# Supplementary material for: Integrative Analysis of Clinical and Bioinformatics Databases to Reveal the Role of Peripheral Innate Immunity in Kawasaki Disease
Source: Hindawi journal article supplement (doi:10.1155/2023/6699050), 2023-11-14
Supplement: f1 [file 6699050.f1.zip]

|           | logFC    | AveExpr  | t        | P.Value  | adj.P.Val | B        |
|-----------|----------|----------|----------|----------|-----------|----------|
| NFKBID    | -2.08727 | 1.608494 | -10.7198 | 1.05E-09 | 2.05E-05  | 12.21904 |
| NADSYN1   | -1.64021 | 0.97417  | -10.252  | 2.23E-09 | 2.18E-05  | 11.53199 |
| FASTKD3   | -1.59649 | 0.542749 | -9.42803 | 8.98E-09 | 5.24E-05  | 10.25176 |
| CTAGE4    | -1.63516 | 1.029487 | -9.32767 | 1.07E-08 | 5.24E-05  | 10.0895  |
| PDE6D     | -1.48248 | 0.939198 | -9.05495 | 1.73E-08 | 6.15E-05  | 9.641427 |
| ZNF213    | -1.6009  | 1.325965 | -8.96293 | 2.04E-08 | 6.15E-05  | 9.487843 |
| GET4      | -1.13941 | 0.807962 | -8.88013 | 2.37E-08 | 6.15E-05  | 9.348612 |
| FLJ22184  | 1.840795 | -1.33772 | 8.792833 | 2.78E-08 | 6.15E-05  | 9.200762 |
| OBFC1     | -1.69949 | 0.650481 | -8.69986 | 3.29E-08 | 6.15E-05  | 9.042075 |
| VAV2      | 2.074467 | -1.86138 | 8.627895 | 3.76E-08 | 6.15E-05  | 8.918384 |
| ZFPM1     | 1.698426 | -1.21502 | 8.614837 | 3.85E-08 | 6.15E-05  | 8.895859 |
| ZNF434    | -1.20169 | 0.805685 | -8.59432 | 4.00E-08 | 6.15E-05  | 8.860413 |
| OSBPL9    | -1.58367 | 1.208838 | -8.58345 | 4.08E-08 | 6.15E-05  | 8.841608 |
| VPS52     | -1.46865 | 1.188755 | -8.50854 | 4.68E-08 | 6.55E-05  | 8.711563 |
| UBE2J1    | -1.97896 | 1.205312 | -8.34799 | 6.32E-08 | 7.68E-05  | 8.430064 |
| C9orf62   | 1.747245 | -1.26445 | 8.333403 | 6.49E-08 | 7.68E-05  | 8.404295 |
| P2RX1     | -2.09945 | 1.405955 | -8.31217 | 6.76E-08 | 7.68E-05  | 8.366729 |
| LDHA      | -2.62566 | 1.460236 | -8.26933 | 7.32E-08 | 7.68E-05  | 8.29075  |
| TMEM158   | 1.959473 | -1.37503 | 8.260559 | 7.45E-08 | 7.68E-05  | 8.275158 |
| BMS1      | -1.17692 | 0.622429 | -8.15755 | 9.05E-08 | 8.48E-05  | 8.091197 |
| TIGD3     | 2.625339 | -1.36874 | 8.155174 | 9.09E-08 | 8.48E-05  | 8.086934 |
| TAGLN3    | 2.021907 | -1.73813 | 8.129232 | 9.55E-08 | 8.51E-05  | 8.040347 |
| CTAGE5    | -1.83565 | 1.183912 | -8.09902 | 1.01E-07 | 8.62E-05  | 7.985963 |
| ANKRD11   | -1.05663 | 0.814461 | -8.03123 | 1.15E-07 | 9.40E-05  | 7.863446 |
| NKAP      | -1.50751 | 0.951393 | -7.98517 | 1.26E-07 | 9.67E-05  | 7.779812 |
| SLC4A1AP  | -1.3489  | 0.867205 | -7.96089 | 1.32E-07 | 9.67E-05  | 7.7356   |
| ABCA3     | 1.43273  | -0.66878 | 7.92911  | 1.40E-07 | 9.67E-05  | 7.677582 |
| CIDEB     | -1.69746 | 1.391939 | -7.89718 | 1.49E-07 | 9.67E-05  | 7.619151 |
| RBM5      | -1.59603 | 1.524373 | -7.89519 | 1.50E-07 | 9.67E-05  | 7.615509 |
| PCDHA11   | 2.032061 | -1.76855 | 7.870251 | 1.57E-07 | 9.67E-05  | 7.569747 |
| C20orf72  | -1.40898 | 1.050198 | -7.86346 | 1.59E-07 | 9.67E-05  | 7.557275 |
| BAALC     | 1.994557 | -1.36606 | 7.862695 | 1.59E-07 | 9.67E-05  | 7.555866 |
| RNF41     | -1.13579 | 0.986108 | -7.85165 | 1.63E-07 | 9.67E-05  | 7.535568 |
| PSMD6     | -1.31863 | 0.543445 | -7.81677 | 1.74E-07 | 0.0001    | 7.471308 |
| ERO1L     | -1.97657 | 1.171397 | -7.74731 | 2.00E-07 | 0.000107  | 7.342827 |
| GUCY1A2   | -1.85364 | 0.364566 | -7.91698 | 2.06E-07 | 0.000107  | 7.330911 |
| LOC613126 | 2.140274 | -1.46614 | 7.712169 | 2.14E-07 | 0.000107  | 7.277548 |
| PSMD7     | -0.85446 | 0.539801 | -7.71042 | 2.15E-07 | 0.000107  | 7.274294 |
| ATG12     | -1.46957 | 0.764607 | -7.70624 | 2.16E-07 | 0.000107  | 7.266508 |
| MAEA      | -2.06985 | 1.519975 | -7.70142 | 2.18E-07 | 0.000107  | 7.25755  |
| ZNF513    | -1.44778 | 0.996865 | -7.68571 | 2.25E-07 | 0.000108  | 7.228269 |
| SNAPIN    | -1.08575 | 0.42944  | -7.62746 | 2.53E-07 | 0.000118  | 7.119423 |
| ARHGEF6   | -2.18192 | 1.49416  | -7.60816 | 2.62E-07 | 0.000118  | 7.083241 |
| LBX1      | 2.095197 | -1.38003 | 7.603439 | 2.65E-07 | 0.000118  | 7.074391 |
| SLC30A7   | -1.61483 | 0.815217 | -7.56429 | 2.86E-07 | 0.000122  | 7.000816 |
| RAB7L1    | -1.04513 | 0.628672 | -7.56266 | 2.87E-07 | 0.000122  | 6.997731 |

|           |          |          |          |          |          |          |
|-----------|----------|----------|----------|----------|----------|----------|
| PDSS1     | -2.91084 | 0.934573 | -7.53995 | 3.00E-07 | 0.000125 | 6.954935 |
| LCE5A     | 2.191734 | -1.41817 | 7.513981 | 3.16E-07 | 0.000128 | 6.905909 |
| TRMT6     | -1.42374 | 0.594393 | -7.49945 | 3.25E-07 | 0.000128 | 6.878435 |
| SYF2      | -1.20077 | 0.914795 | -7.49651 | 3.27E-07 | 0.000128 | 6.872872 |
| FAM32A    | -1.23512 | 0.699958 | -7.48243 | 3.37E-07 | 0.000129 | 6.846207 |
| LPCAT3    | -2.12424 | 1.491429 | -7.46455 | 3.49E-07 | 0.000131 | 6.812299 |
| INTS12    | -1.16669 | 0.667874 | -7.44914 | 3.60E-07 | 0.000133 | 6.783038 |
| ZC3H3     | -2.57176 | 1.905103 | -7.40754 | 3.91E-07 | 0.000139 | 6.703876 |
| SEPHS2    | -1.74096 | 0.925236 | -7.4073  | 3.91E-07 | 0.000139 | 6.703416 |
| BTK       | -1.24019 | 0.885593 | -7.39045 | 4.04E-07 | 0.000141 | 6.671278 |
| LOC100130 | 2.169287 | -1.40125 | 7.382189 | 4.11E-07 | 0.000141 | 6.655508 |
| TTC13     | -1.30618 | 0.663992 | -7.37165 | 4.20E-07 | 0.000142 | 6.635365 |
| MYCBP     | -1.67877 | 1.171977 | -7.33947 | 4.48E-07 | 0.000145 | 6.57378  |
| FCRL5     | -2.07106 | 1.624625 | -7.33545 | 4.52E-07 | 0.000145 | 6.566069 |
| TMEM185I  | -2.34929 | 1.627892 | -7.33436 | 4.53E-07 | 0.000145 | 6.563996 |
| ING2      | -0.86326 | 0.559045 | -7.31572 | 4.70E-07 | 0.000149 | 6.52822  |
| TMEM184I  | -1.95081 | 1.33475  | -7.30306 | 4.82E-07 | 0.00015  | 6.503913 |
| TMED5     | -1.75955 | 1.036578 | -7.28859 | 4.96E-07 | 0.000152 | 6.476079 |
| CACNA2D2  | 2.005433 | -1.12104 | 7.244868 | 5.42E-07 | 0.000157 | 6.391828 |
| GPX1      | 2.309606 | -1.46961 | 7.236361 | 5.52E-07 | 0.000157 | 6.375399 |
| FBXO7     | 3.174887 | -1.82292 | 7.219105 | 5.71E-07 | 0.000157 | 6.342044 |
| PLEKHA8   | 1.642571 | -0.42594 | 7.370563 | 5.78E-07 | 0.000157 | 6.339493 |
| CTAGE11P  | -1.4615  | 0.684194 | -7.21338 | 5.78E-07 | 0.000157 | 6.330961 |
| BUD31     | -1.08246 | 0.745846 | -7.20512 | 5.88E-07 | 0.000157 | 6.314987 |
| ZKSCAN1   | -1.45287 | 1.043598 | -7.20512 | 5.88E-07 | 0.000157 | 6.314973 |
| WSB1      | -2.59717 | 1.201578 | -7.20235 | 5.91E-07 | 0.000157 | 6.309615 |
| HECTD3    | -1.54214 | 1.529846 | -7.18558 | 6.11E-07 | 0.000157 | 6.277122 |
| YWHAZ     | -1.71143 | 1.322872 | -7.18307 | 6.14E-07 | 0.000157 | 6.272242 |
| ARPP19    | -1.37212 | 0.959564 | -7.1784  | 6.20E-07 | 0.000157 | 6.263189 |
| POLL      | 1.453342 | -0.79276 | 7.175885 | 6.23E-07 | 0.000157 | 6.258303 |
| FAM156A   | -0.8331  | 0.629689 | -7.17394 | 6.26E-07 | 0.000157 | 6.254533 |
| MLF2      | -1.50244 | 1.442699 | -7.17361 | 6.26E-07 | 0.000157 | 6.253885 |
| HIATL1    | -1.7556  | 0.928416 | -7.16084 | 6.43E-07 | 0.000159 | 6.229079 |
| RTF1      | -1.24265 | 1.040229 | -7.11352 | 7.08E-07 | 0.000173 | 6.136973 |
| LOC100130 | 1.144144 | -0.62174 | 7.07853  | 7.60E-07 | 0.000181 | 6.068656 |
| AK2       | -0.95801 | 0.913411 | -7.06553 | 7.81E-07 | 0.000181 | 6.043227 |
| MAU2      | -0.89326 | 0.511119 | -7.06432 | 7.83E-07 | 0.000181 | 6.040853 |
| PLP2      | -2.07399 | 1.360527 | -7.06408 | 7.83E-07 | 0.000181 | 6.040391 |
| ACN9      | -1.91459 | 0.751852 | -7.0636  | 7.84E-07 | 0.000181 | 6.039444 |
| PXN       | -2.33851 | 1.744753 | -7.05716 | 7.94E-07 | 0.000181 | 6.026841 |
| SNW1      | -0.8883  | 0.767782 | -7.04527 | 8.14E-07 | 0.000183 | 6.003535 |
| SDC4      | 1.448661 | -1.0461  | 7.024624 | 8.49E-07 | 0.000189 | 5.963042 |
| NME6      | -1.29233 | 0.878295 | -7.0158  | 8.65E-07 | 0.00019  | 5.94571  |
| PPP1R11   | -1.601   | 1.107    | -7.00908 | 8.77E-07 | 0.000191 | 5.93251  |
| AKAP17A   | -0.93646 | 0.537231 | -6.98081 | 9.29E-07 | 0.000197 | 5.876888 |
| HMGXB4    | -0.7821  | 0.302517 | -6.97709 | 9.36E-07 | 0.000197 | 5.869555 |
| LOC401320 | -2.00437 | 1.323894 | -6.97556 | 9.39E-07 | 0.000197 | 5.866548 |

|           |          |          |          |          |          |          |
|-----------|----------|----------|----------|----------|----------|----------|
| PRMT2     | -1.24377 | 0.797759 | -6.97188 | 9.46E-07 | 0.000197 | 5.859291 |
| PLAC8     | -2.71868 | 1.295749 | -6.9597  | 9.70E-07 | 0.0002   | 5.835264 |
| C11orf71  | -1.53408 | 0.811375 | -6.95605 | 9.78E-07 | 0.0002   | 5.828064 |
| PSPC1     | -1.51661 | 0.91623  | -6.94087 | 1.01E-06 | 0.000204 | 5.798085 |
| HMGB3     | -1.2502  | 0.67564  | -6.93629 | 1.02E-06 | 0.000204 | 5.789045 |
| PIGG      | -0.9219  | 0.511063 | -6.90173 | 1.09E-06 | 0.000215 | 5.720654 |
| HNRNPA2E  | -1.28663 | 0.807011 | -6.89973 | 1.10E-06 | 0.000215 | 5.7167   |
| UBE2Q1    | -1.68155 | 1.245634 | -6.89029 | 1.12E-06 | 0.000217 | 5.697971 |
| RPIA      | 1.857675 | -1.4397  | 6.866056 | 1.18E-06 | 0.000222 | 5.649877 |
| TCHP      | -1.31669 | 1.026586 | -6.86504 | 1.18E-06 | 0.000222 | 5.647856 |
| MLX       | -1.03789 | 0.757405 | -6.85912 | 1.19E-06 | 0.000222 | 5.636096 |
| IFITM5    | 1.595606 | -1.00987 | 6.858078 | 1.20E-06 | 0.000222 | 5.634024 |
| SAP30L    | -1.51452 | 0.971311 | -6.85603 | 1.20E-06 | 0.000222 | 5.629944 |
| CACNA1I   | 1.996406 | -1.07788 | 6.849188 | 1.22E-06 | 0.000222 | 5.616347 |
| FAM20A    | -3.61764 | 1.949059 | -6.84418 | 1.23E-06 | 0.000222 | 5.606392 |
| GRM4      | 0.853102 | -0.44014 | 6.843042 | 1.24E-06 | 0.000222 | 5.604119 |
| NDUFA8    | -0.81446 | 0.698444 | -6.83804 | 1.25E-06 | 0.000222 | 5.594164 |
| FOXQ1     | 1.904299 | -1.14074 | 6.800038 | 1.35E-06 | 0.000233 | 5.518407 |
| AAK1      | 2.382643 | -1.5307  | 6.799983 | 1.35E-06 | 0.000233 | 5.518296 |
| SLC37A3   | -2.18683 | 1.339089 | -6.79291 | 1.37E-06 | 0.000233 | 5.504178 |
| TMCO3     | -2.50404 | 1.324858 | -6.78901 | 1.38E-06 | 0.000233 | 5.496376 |
| ARHGAP3C  | -1.13752 | 1.049265 | -6.78208 | 1.40E-06 | 0.000233 | 5.482529 |
| APPL2     | -1.26607 | 0.712059 | -6.78057 | 1.41E-06 | 0.000233 | 5.479507 |
| POU2F1    | 1.240422 | -0.93221 | 6.777317 | 1.42E-06 | 0.000233 | 5.473011 |
| VWCE      | 4.535593 | -1.91286 | 6.77505  | 1.42E-06 | 0.000233 | 5.468478 |
| KLRB1     | 3.126749 | -2.02929 | 6.77138  | 1.43E-06 | 0.000233 | 5.461138 |
| EDARADD   | 1.130395 | -0.87198 | 6.771102 | 1.43E-06 | 0.000233 | 5.460581 |
| ZSWIM3    | -0.81238 | 0.643778 | -6.77058 | 1.44E-06 | 0.000233 | 5.459536 |
| SNRNP27   | -1.45925 | 0.807367 | -6.7595  | 1.47E-06 | 0.000233 | 5.437361 |
| LOC729164 | 1.250141 | -0.84185 | 6.757485 | 1.48E-06 | 0.000233 | 5.433328 |
| ATPAF1    | -1.35962 | 0.810654 | -6.75674 | 1.48E-06 | 0.000233 | 5.431837 |
| ODC1      | 1.698028 | -0.80011 | 6.753513 | 1.49E-06 | 0.000233 | 5.425372 |
| USP35     | -1.18462 | 0.612832 | -6.74531 | 1.51E-06 | 0.000234 | 5.408932 |
| BAG1      | 3.282355 | -1.96156 | 6.744165 | 1.52E-06 | 0.000234 | 5.406642 |
| ISY1      | -1.5477  | 0.883933 | -6.7229  | 1.59E-06 | 0.000242 | 5.363979 |
| CDC37     | -1.58439 | 1.215408 | -6.71385 | 1.62E-06 | 0.000242 | 5.345808 |
| Mar-08    | 2.551249 | -1.24447 | 6.71125  | 1.63E-06 | 0.000242 | 5.340589 |
| ZFP91     | -1.2569  | 1.001162 | -6.7098  | 1.63E-06 | 0.000242 | 5.337666 |
| SLC25A28  | -1.37303 | 0.481478 | -6.70978 | 1.63E-06 | 0.000242 | 5.33764  |
| ZNF276    | -1.56841 | 1.075052 | -6.69384 | 1.69E-06 | 0.000246 | 5.305582 |
| MFAP1     | -1.20226 | 1.034384 | -6.69305 | 1.69E-06 | 0.000246 | 5.303999 |
| FAM127B   | -1.49961 | 1.326981 | -6.6922  | 1.69E-06 | 0.000246 | 5.302297 |
| RIPK3     | -1.87048 | 1.086975 | -6.68151 | 1.73E-06 | 0.000249 | 5.280771 |
| APBB3     | -0.91124 | 0.752671 | -6.67933 | 1.74E-06 | 0.000249 | 5.276387 |
| PHOX2A    | 0.975945 | -0.89689 | 6.672893 | 1.76E-06 | 0.00025  | 5.263416 |
| TTC17     | -1.04771 | 0.494738 | -6.66886 | 1.78E-06 | 0.000251 | 5.255296 |
| CSGALNAC  | -2.44293 | 1.20388  | -6.66397 | 1.80E-06 | 0.000251 | 5.245427 |

|           |          |          |          |          |          |          |
|-----------|----------|----------|----------|----------|----------|----------|
| LAIR1     | -2.28629 | 1.076504 | -6.65627 | 1.82E-06 | 0.000254 | 5.229898 |
| ADPGK     | -1.27125 | 0.513433 | -6.64692 | 1.86E-06 | 0.000256 | 5.211048 |
| GALNT2    | -2.10586 | 1.274118 | -6.64481 | 1.87E-06 | 0.000256 | 5.206789 |
| RAB7A     | -2.34562 | 1.635524 | -6.63665 | 1.90E-06 | 0.000257 | 5.190298 |
| LOC43995  | 2.304668 | -1.21225 | 6.633116 | 1.92E-06 | 0.000257 | 5.183164 |
| DSCR3     | -1.3503  | 1.022442 | -6.62849 | 1.93E-06 | 0.000257 | 5.173812 |
| CAPN6     | 2.576294 | -1.71623 | 6.742903 | 2.00E-06 | 0.000257 | 5.167888 |
| KLKB1     | 3.018837 | -1.68299 | 6.619714 | 1.97E-06 | 0.000257 | 5.156074 |
| SAP25     | 1.84325  | -1.16453 | 6.619043 | 1.97E-06 | 0.000257 | 5.154716 |
| TTI1      | -1.4872  | 1.459958 | -6.61327 | 2.00E-06 | 0.000257 | 5.143036 |
| C17orf56  | -0.71751 | 0.540886 | -6.61133 | 2.01E-06 | 0.000257 | 5.139116 |
| KIN       | -1.89298 | 1.011302 | -6.60625 | 2.03E-06 | 0.000257 | 5.128827 |
| YKT6      | -1.30481 | 0.735754 | -6.60469 | 2.03E-06 | 0.000257 | 5.125676 |
| C12orf5   | -1.04629 | 0.532423 | -6.60375 | 2.04E-06 | 0.000257 | 5.12376  |
| DCTN1     | 1.317215 | -0.49332 | 6.599583 | 2.06E-06 | 0.000257 | 5.115332 |
| ZNFX1-AS1 | -2.2367  | 1.45673  | -6.59705 | 2.07E-06 | 0.000257 | 5.110199 |
| LHFPL5    | 1.706159 | -1.15966 | 6.593783 | 2.08E-06 | 0.000257 | 5.103583 |
| USP12     | 1.090925 | -0.90675 | 6.592284 | 2.09E-06 | 0.000257 | 5.100546 |
| RER1      | -1.49947 | 1.228562 | -6.58957 | 2.10E-06 | 0.000257 | 5.095056 |
| IDI1      | -2.30669 | 0.473266 | -6.58943 | 2.10E-06 | 0.000257 | 5.094772 |
| MTRNR2L2  | 1.741085 | -1.11187 | 6.577907 | 2.15E-06 | 0.000262 | 5.0714   |
| GPR182    | 1.761838 | -1.21252 | 6.563997 | 2.22E-06 | 0.000268 | 5.043172 |
| PHTF1     | -2.06263 | 0.972189 | -6.55883 | 2.24E-06 | 0.000268 | 5.032674 |
| EFEMP2    | -1.65907 | 1.007982 | -6.55844 | 2.24E-06 | 0.000268 | 5.031882 |
| MGC16121  | -1.67432 | 0.719175 | -6.5535  | 2.27E-06 | 0.000269 | 5.021862 |
| GK        | -2.75555 | 1.546091 | -6.55103 | 2.28E-06 | 0.000269 | 5.016828 |
| CDC42EP5  | 1.587234 | -1.02358 | 6.548767 | 2.29E-06 | 0.000269 | 5.012234 |
| RAC2      | -1.66285 | 1.276852 | -6.54483 | 2.31E-06 | 0.000269 | 5.004226 |
| CD55      | -3.16864 | 2.35698  | -6.54045 | 2.33E-06 | 0.000269 | 4.995321 |
| FAM193B   | -1.34185 | 1.108619 | -6.53905 | 2.34E-06 | 0.000269 | 4.992477 |
| PPIB      | -1.10378 | 1.120604 | -6.53109 | 2.38E-06 | 0.000271 | 4.976291 |
| PROSC     | -1.09073 | 0.75129  | -6.52565 | 2.40E-06 | 0.000271 | 4.965219 |
| RPS6KA5   | 2.106996 | -1.33575 | 6.52541  | 2.41E-06 | 0.000271 | 4.964723 |
| SUPT7L    | -1.21496 | 0.820294 | -6.52456 | 2.41E-06 | 0.000271 | 4.962989 |
| SOCS3     | -2.49349 | 1.61438  | -6.51891 | 2.44E-06 | 0.000272 | 4.951486 |
| SHISA4    | 3.241737 | -1.60876 | 6.515134 | 2.46E-06 | 0.000272 | 4.943797 |
| PHKG2     | -1.19285 | 0.803777 | -6.51329 | 2.47E-06 | 0.000272 | 4.940033 |
| TPM4      | -1.72482 | 1.255953 | -6.51281 | 2.47E-06 | 0.000272 | 4.939057 |
| XRN2      | -1.69753 | 0.824023 | -6.49435 | 2.57E-06 | 0.000281 | 4.901416 |
| TCEANC2   | -1.20456 | 0.839539 | -6.49198 | 2.58E-06 | 0.000281 | 4.896587 |
| PROKR1    | 2.420314 | -1.48093 | 6.480447 | 2.65E-06 | 0.000286 | 4.873046 |
| PLAA      | -0.82113 | 0.256962 | -6.475   | 2.68E-06 | 0.000286 | 4.861924 |
| DDX42     | -0.82077 | 0.440188 | -6.47327 | 2.69E-06 | 0.000286 | 4.858385 |
| LEMD2     | -0.79771 | 0.487528 | -6.47203 | 2.69E-06 | 0.000286 | 4.85585  |
| MRPL33    | -1.51671 | 1.064798 | -6.47034 | 2.70E-06 | 0.000286 | 4.852406 |
| LPCAT2    | -2.77601 | 1.587807 | -6.46714 | 2.72E-06 | 0.000287 | 4.845861 |
| PGC       | 2.286694 | -1.40279 | 6.461748 | 2.75E-06 | 0.000288 | 4.834833 |



|           |          |          |          |          |          |          |
|-----------|----------|----------|----------|----------|----------|----------|
| LOC100288 | -1.37212 | 0.809283 | -6.45627 | 2.79E-06 | 0.000288 | 4.823623 |
| ERLIN2    | -1.99332 | 1.117137 | -6.4555  | 2.79E-06 | 0.000288 | 4.82206  |
| ARHGAP24  | -1.65663 | 1.000396 | -6.45522 | 2.79E-06 | 0.000288 | 4.821485 |
| Sep-03    | 1.899752 | -0.58479 | 6.551749 | 2.94E-06 | 0.000293 | 4.795887 |
| NKIRAS2   | -1.54168 | 1.380925 | -6.43856 | 2.89E-06 | 0.000293 | 4.787391 |
| TEX261    | -1.04561 | 0.835845 | -6.43725 | 2.90E-06 | 0.000293 | 4.784702 |
| GABRP     | 3.450342 | -1.95695 | 6.436988 | 2.90E-06 | 0.000293 | 4.784163 |
| BATF      | -1.85953 | 0.997321 | -6.43474 | 2.92E-06 | 0.000293 | 4.779557 |
| LSR       | 1.758006 | -0.86777 | 6.432417 | 2.93E-06 | 0.000293 | 4.774799 |
| RPP14     | -0.82525 | 0.514797 | -6.43185 | 2.93E-06 | 0.000293 | 4.773631 |
| NEDD8     | -0.81019 | 0.679417 | -6.42778 | 2.96E-06 | 0.000293 | 4.765302 |
| RAB4B     | -1.49756 | 0.904373 | -6.41251 | 3.06E-06 | 0.000301 | 4.733989 |
| FAM46C    | 2.2773   | -1.2843  | 6.407874 | 3.09E-06 | 0.000301 | 4.724472 |
| LOC100130 | 3.438648 | -1.9688  | 6.407856 | 3.09E-06 | 0.000301 | 4.724435 |
| MEF2BNB   | -1.40117 | 0.819181 | -6.4003  | 3.14E-06 | 0.000301 | 4.708925 |
| SEL1L3    | -1.30382 | 0.790305 | -6.39877 | 3.15E-06 | 0.000301 | 4.705778 |
| CD164     | -1.80845 | 1.103959 | -6.39783 | 3.15E-06 | 0.000301 | 4.70386  |
| LOC100506 | -1.57915 | 0.593918 | -6.39604 | 3.17E-06 | 0.000301 | 4.700164 |
| HPR       | -3.31436 | 2.093303 | -6.39413 | 3.18E-06 | 0.000301 | 4.696254 |
| CACNB3    | 1.104816 | -0.45092 | 6.392005 | 3.19E-06 | 0.000301 | 4.691886 |
| SORBS3    | 1.861286 | -0.91091 | 6.391497 | 3.20E-06 | 0.000301 | 4.690842 |
| EFCAB3    | 3.100985 | -1.74996 | 6.389358 | 3.21E-06 | 0.000301 | 4.686446 |
| CUTC      | -1.56821 | 0.687886 | -6.38671 | 3.23E-06 | 0.000301 | 4.680995 |
| GYPB      | 3.801382 | -1.59605 | 6.378871 | 3.29E-06 | 0.000305 | 4.66489  |
| ANKS3     | 2.713949 | -1.57786 | 6.365926 | 3.38E-06 | 0.000312 | 4.638259 |
| RBM17     | -0.93461 | 0.647189 | -6.36236 | 3.40E-06 | 0.000313 | 4.630928 |
| PABPC1L   | -0.85691 | 0.791106 | -6.35891 | 3.43E-06 | 0.000313 | 4.623824 |
| MUS81     | -1.18912 | 0.706739 | -6.35746 | 3.44E-06 | 0.000313 | 4.620826 |
| ARL11     | -2.18206 | 1.448255 | -6.35588 | 3.45E-06 | 0.000313 | 4.61758  |
| MOB3C     | -1.5368  | 1.021803 | -6.35354 | 3.47E-06 | 0.000313 | 4.612754 |
| HMGB1     | -1.61833 | 0.925664 | -6.34428 | 3.54E-06 | 0.000318 | 4.593667 |
| SOX13     | 2.720504 | -1.25582 | 6.442405 | 3.68E-06 | 0.000321 | 4.582175 |
| YIPF2     | 0.813989 | -0.3293  | 6.338564 | 3.58E-06 | 0.000318 | 4.581892 |
| C17orf76  | 1.370094 | -0.6343  | 6.337588 | 3.59E-06 | 0.000318 | 4.579879 |
| IL2RG     | -1.72719 | 1.49931  | -6.33733 | 3.59E-06 | 0.000318 | 4.579358 |
| LHB       | 2.123043 | -1.07147 | 6.329862 | 3.65E-06 | 0.000321 | 4.563944 |
| ZNF143    | -1.2116  | 0.764891 | -6.3252  | 3.69E-06 | 0.000321 | 4.554333 |
| FAM83A    | 1.598106 | -0.96606 | 6.546293 | 3.90E-06 | 0.000329 | 4.552069 |
| ANXA3     | -3.86776 | 2.188451 | -6.32297 | 3.70E-06 | 0.000321 | 4.549723 |
| STC1      | 2.755284 | -1.63217 | 6.322432 | 3.71E-06 | 0.000321 | 4.548612 |
| PEX19     | -1.14269 | 0.631517 | -6.31532 | 3.76E-06 | 0.000323 | 4.533936 |
| ZADH2     | -0.89398 | 0.378448 | -6.31513 | 3.77E-06 | 0.000323 | 4.533526 |
| RHBG      | 1.062413 | -0.63996 | 6.314407 | 3.77E-06 | 0.000323 | 4.532042 |
| OPN1LW    | 3.173497 | -1.80601 | 6.307912 | 3.82E-06 | 0.000326 | 4.518626 |
| STX4      | -1.11014 | 0.753174 | -6.3031  | 3.86E-06 | 0.000328 | 4.508675 |
| KRIT1     | -1.27641 | 0.833627 | -6.29621 | 3.92E-06 | 0.00033  | 4.494439 |
| CYB5B     | -1.03018 | 0.885834 | -6.29137 | 3.96E-06 | 0.00033  | 4.484428 |

|           |          |          |          |          |          |          |
|-----------|----------|----------|----------|----------|----------|----------|
| NECAP1    | 2.218738 | -1.14168 | 6.290839 | 3.97E-06 | 0.00033  | 4.48333  |
| GALNT14   | -3.08138 | 2.294589 | -6.28977 | 3.98E-06 | 0.00033  | 4.481115 |
| FLJ37453  | -0.78459 | 0.469462 | -6.28711 | 4.00E-06 | 0.000331 | 4.475626 |
| PDGFB     | 1.76046  | -0.76101 | 6.283818 | 4.03E-06 | 0.000332 | 4.468805 |
| CRCT1     | 2.333949 | -1.39671 | 6.277012 | 4.09E-06 | 0.000335 | 4.454716 |
| CHCHD7    | -2.35019 | 1.280632 | -6.26733 | 4.17E-06 | 0.000341 | 4.434657 |
| MYO15B    | -1.07983 | 0.867684 | -6.26527 | 4.19E-06 | 0.000341 | 4.430404 |
| MUSTN1    | -1.96768 | 0.997706 | -6.2611  | 4.23E-06 | 0.000342 | 4.421766 |
| TIFA      | -2.41888 | 0.935194 | -6.24394 | 4.39E-06 | 0.000352 | 4.386179 |
| PIM3      | -1.2702  | 0.710514 | -6.24215 | 4.41E-06 | 0.000352 | 4.382466 |
| MSL1      | -1.85594 | 0.926794 | -6.2415  | 4.41E-06 | 0.000352 | 4.381099 |
| CHKB      | -1.20727 | 0.719407 | -6.24109 | 4.42E-06 | 0.000352 | 4.380248 |
| BCAS4     | -1.00219 | 0.791725 | -6.23532 | 4.47E-06 | 0.000353 | 4.368287 |
| C1S       | 2.996308 | -1.75226 | 6.234665 | 4.48E-06 | 0.000353 | 4.366921 |
| CLP1      | -0.88882 | 0.828971 | -6.23392 | 4.48E-06 | 0.000353 | 4.365381 |
| CFLAR     | -1.84939 | 1.263067 | -6.22983 | 4.52E-06 | 0.000355 | 4.356877 |
| ACVR1B    | 2.050647 | -0.94597 | 6.218726 | 4.63E-06 | 0.000361 | 4.333813 |
| TTC35     | -2.33241 | 1.013597 | -6.31484 | 4.79E-06 | 0.000361 | 4.328182 |
| IGFBP7    | -1.95988 | 1.139832 | -6.21243 | 4.70E-06 | 0.000361 | 4.320716 |
| NDUFAF1   | -1.52564 | 0.891882 | -6.21145 | 4.71E-06 | 0.000361 | 4.31869  |
| AGPAT2    | -1.70489 | 1.471594 | -6.21031 | 4.72E-06 | 0.000361 | 4.316326 |
| MTFMT     | -1.20582 | 0.813675 | -6.20973 | 4.72E-06 | 0.000361 | 4.315107 |
| OR2A25    | 2.706141 | -1.60604 | 6.209492 | 4.73E-06 | 0.000361 | 4.314615 |
| SDHC      | -1.09352 | 0.471887 | -6.2048  | 4.78E-06 | 0.000361 | 4.304865 |
| BLVRB     | 3.016396 | -1.60254 | 6.20168  | 4.81E-06 | 0.000361 | 4.298368 |
| NXF3      | 1.457064 | -0.78463 | 6.199657 | 4.83E-06 | 0.000361 | 4.294157 |
| DDB1      | 1.214263 | -0.84515 | 6.199068 | 4.83E-06 | 0.000361 | 4.292931 |
| GPR84     | -3.26898 | 2.136504 | -6.19721 | 4.85E-06 | 0.000361 | 4.289062 |
| LILRA5    | -3.02321 | 1.710722 | -6.1963  | 4.86E-06 | 0.000361 | 4.287167 |
| RGS19     | -1.23873 | 0.946609 | -6.19602 | 4.87E-06 | 0.000361 | 4.286582 |
| NUDT5     | -1.23797 | 0.95288  | -6.1931  | 4.90E-06 | 0.000362 | 4.280514 |
| DCTN2     | -1.08952 | 0.60169  | -6.19011 | 4.93E-06 | 0.000362 | 4.274285 |
| OR6Y1     | 1.833197 | -1.0448  | 6.189639 | 4.93E-06 | 0.000362 | 4.273306 |
| TBCC      | -0.90675 | 0.59859  | -6.18733 | 4.96E-06 | 0.000363 | 4.268502 |
| SUMO3     | -1.19501 | 0.906186 | -6.17775 | 5.06E-06 | 0.000366 | 4.248545 |
| CEACAM1   | -2.78195 | 1.980718 | -6.17771 | 5.06E-06 | 0.000366 | 4.248454 |
| LINC00341 | 1.489535 | -0.87495 | 6.175619 | 5.09E-06 | 0.000366 | 4.2441   |
| BEST1     | -2.36956 | 1.741394 | -6.17363 | 5.11E-06 | 0.000366 | 4.239945 |
| SEC61A2   | -1.93142 | 0.948362 | -6.17345 | 5.11E-06 | 0.000366 | 4.239582 |
| PHF23     | -1.34058 | 1.117665 | -6.17176 | 5.13E-06 | 0.000366 | 4.236065 |
| DNTTIP2   | -1.3038  | 0.63211  | -6.16785 | 5.17E-06 | 0.000366 | 4.227908 |
| CYBA      | -2.15329 | 1.137184 | -6.16689 | 5.18E-06 | 0.000366 | 4.225912 |
| PRKAG1    | -1.37584 | 0.567415 | -6.16654 | 5.19E-06 | 0.000366 | 4.225178 |
| WDR48     | -0.99517 | 0.477536 | -6.16623 | 5.19E-06 | 0.000366 | 4.224536 |
| FOXD2     | 1.534206 | -1.02055 | 6.162591 | 5.23E-06 | 0.000366 | 4.216937 |
| CHN1      | 1.429356 | -1.04602 | 6.162269 | 5.24E-06 | 0.000366 | 4.216266 |
| DUX4L4    | 1.712277 | -1.00001 | 6.15912  | 5.27E-06 | 0.000368 | 4.209696 |

|           |          |          |          |          |          |          |
|-----------|----------|----------|----------|----------|----------|----------|
| TAS1R1    | 2.30952  | -1.04026 | 6.156456 | 5.30E-06 | 0.000368 | 4.204138 |
| SNX7      | 2.385315 | -1.48157 | 6.153153 | 5.34E-06 | 0.00037  | 4.197244 |
| ACP6      | -1.36853 | 0.717015 | -6.14884 | 5.39E-06 | 0.000372 | 4.188249 |
| SYN3      | 1.689976 | -1.09747 | 6.144642 | 5.44E-06 | 0.000372 | 4.179477 |
| ROGDI     | -1.94798 | 1.253092 | -6.14322 | 5.46E-06 | 0.000372 | 4.176518 |
| LOC100501 | -1.52552 | 0.838106 | -6.14225 | 5.47E-06 | 0.000372 | 4.174485 |
| MYOD1     | 1.307581 | -0.71886 | 6.14224  | 5.47E-06 | 0.000372 | 4.174462 |
| VPS25     | -1.03519 | 0.408536 | -6.13095 | 5.60E-06 | 0.00038  | 4.150866 |
| PNMA5     | 1.8758   | -0.91261 | 6.128341 | 5.63E-06 | 0.000381 | 4.145421 |
| TCFL5     | -1.25548 | 0.591333 | -6.12326 | 5.70E-06 | 0.000381 | 4.134805 |
| MTMR1     | -1.06388 | 0.499695 | -6.12281 | 5.70E-06 | 0.000381 | 4.133849 |
| LOC441451 | 2.183718 | -1.17287 | 6.121181 | 5.72E-06 | 0.000381 | 4.130451 |
| ZNF394    | -0.68875 | 0.410308 | -6.12116 | 5.72E-06 | 0.000381 | 4.130411 |
| SLC35C1   | 0.97856  | -0.41196 | 6.120313 | 5.73E-06 | 0.000381 | 4.128635 |
| PTGDR     | 1.555283 | -0.62263 | 6.114407 | 5.81E-06 | 0.000384 | 4.116281 |
| OTP       | 2.868128 | -1.59568 | 6.113747 | 5.82E-06 | 0.000384 | 4.114901 |
| IRAK3     | -3.45676 | 1.916174 | -6.11165 | 5.84E-06 | 0.000384 | 4.110513 |
| PRPF18    | -1.5504  | 0.725993 | -6.11073 | 5.85E-06 | 0.000384 | 4.108594 |
| SNX20     | -2.0153  | 1.285208 | -6.10428 | 5.94E-06 | 0.000388 | 4.095094 |
| IQGAP3    | 1.36766  | -0.85774 | 6.102038 | 5.97E-06 | 0.000388 | 4.090393 |
| TAZ       | -0.77389 | 0.655544 | -6.09996 | 5.99E-06 | 0.000389 | 4.086041 |
| LINC00239 | 2.210706 | -1.33743 | 6.097983 | 6.02E-06 | 0.000389 | 4.0819   |
| HMGB4     | 2.950489 | -1.68905 | 6.091186 | 6.11E-06 | 0.000391 | 4.067663 |
| PPM1M     | -1.65255 | 0.924079 | -6.09113 | 6.11E-06 | 0.000391 | 4.067536 |
| ING1      | -0.83555 | 0.567232 | -6.08993 | 6.13E-06 | 0.000391 | 4.065023 |
| PSME3     | -1.01774 | 0.80085  | -6.08849 | 6.14E-06 | 0.000391 | 4.06202  |
| RPL3L     | 2.616075 | -1.27779 | 6.087746 | 6.15E-06 | 0.000391 | 4.060453 |
| TBC1D2B   | -1.91851 | 1.073427 | -6.08709 | 6.16E-06 | 0.000391 | 4.059071 |
| ACER3     | -2.88912 | 1.309303 | -6.08533 | 6.19E-06 | 0.000391 | 4.0554   |
| MTMR14    | -1.59923 | 1.303325 | -6.08299 | 6.22E-06 | 0.000391 | 4.050492 |
| CROCCP2   | -1.29655 | 0.788683 | -6.08057 | 6.25E-06 | 0.000391 | 4.04542  |
| CLK2      | -1.37752 | 1.035112 | -6.08031 | 6.25E-06 | 0.000391 | 4.044872 |
| SORT1     | -2.96929 | 1.347151 | -6.0789  | 6.27E-06 | 0.000391 | 4.041914 |
| GRIN2D    | 2.117491 | -1.12175 | 6.078132 | 6.28E-06 | 0.000391 | 4.0403   |
| POMP      | -1.3318  | 0.823649 | -6.07523 | 6.32E-06 | 0.000391 | 4.03422  |
| YTHDC2    | -1.4421  | 0.833366 | -6.07499 | 6.33E-06 | 0.000391 | 4.033704 |
| MITD1     | -1.40085 | 0.567167 | -6.07037 | 6.39E-06 | 0.000394 | 4.024016 |
| DKFZp434l | 1.027168 | -1.1007  | 6.067703 | 6.43E-06 | 0.000395 | 4.018422 |
| TSPAN31   | -1.86434 | 1.182164 | -6.06514 | 6.46E-06 | 0.000396 | 4.013054 |
| PSMC1     | -0.94494 | 0.654415 | -6.06297 | 6.50E-06 | 0.000396 | 4.008481 |
| TMCO6     | -0.9829  | 0.470931 | -6.058   | 6.57E-06 | 0.0004   | 3.998049 |
| RABGEF1   | -2.1692  | 1.383145 | -6.05422 | 6.62E-06 | 0.000402 | 3.990128 |
| LOC100501 | 1.954584 | -1.23955 | 6.052865 | 6.64E-06 | 0.000402 | 3.987274 |
| DDX53     | 1.653402 | -0.5394  | 6.248332 | 7.04E-06 | 0.000416 | 3.984529 |
| CASP4     | -1.17442 | 1.114345 | -6.04521 | 6.75E-06 | 0.000406 | 3.971191 |
| ANKRD65   | 2.86857  | -1.30666 | 6.044797 | 6.76E-06 | 0.000406 | 3.970325 |
| XK        | 2.041977 | -1.25002 | 6.041535 | 6.81E-06 | 0.000408 | 3.963469 |

|           |          |          |          |          |          |          |
|-----------|----------|----------|----------|----------|----------|----------|
| MPV17     | -0.98476 | 0.981985 | -6.04008 | 6.83E-06 | 0.000408 | 3.960412 |
| CAPN3     | -1.58684 | 0.941224 | -6.03532 | 6.90E-06 | 0.000411 | 3.950414 |
| MED8      | -1.5895  | 1.193429 | -6.02831 | 7.00E-06 | 0.000415 | 3.935672 |
| SEC22C    | -1.07275 | 0.523389 | -6.0283  | 7.01E-06 | 0.000415 | 3.935638 |
| EBPL      | -1.043   | 0.390221 | -6.02223 | 7.10E-06 | 0.000416 | 3.922868 |
| WWP2      | -1.45616 | 0.853888 | -6.02202 | 7.10E-06 | 0.000416 | 3.922433 |
| ELL3      | -1.73511 | 1.132324 | -6.0216  | 7.11E-06 | 0.000416 | 3.921545 |
| FCGR1B    | -2.87762 | 1.989663 | -6.01881 | 7.15E-06 | 0.000417 | 3.915668 |
| NOV       | 1.991838 | -0.74225 | 6.012312 | 7.25E-06 | 0.000422 | 3.901995 |
| DCT       | 3.299497 | -1.71325 | 6.010219 | 7.29E-06 | 0.000422 | 3.897589 |
| PLAC4     | 1.823181 | -0.88376 | 6.009819 | 7.29E-06 | 0.000422 | 3.896745 |
| LOC100651 | 1.395066 | -1.14383 | 6.007777 | 7.33E-06 | 0.000422 | 3.892446 |
| SNCA      | 2.947466 | -1.79527 | 6.002093 | 7.42E-06 | 0.000426 | 3.880472 |
| ATAD3C    | 1.544499 | -0.80952 | 6.000755 | 7.44E-06 | 0.000426 | 3.877653 |
| SMPD2     | -1.33245 | 0.783233 | -5.99871 | 7.47E-06 | 0.000426 | 3.873353 |
| MB21D2    | 1.814956 | -1.1897  | 5.996668 | 7.51E-06 | 0.000426 | 3.869041 |
| TRIOBP    | -2.37304 | 2.184848 | -5.99421 | 7.55E-06 | 0.000426 | 3.863852 |
| KIAA0895L | -1.57866 | 1.362779 | -5.99394 | 7.55E-06 | 0.000426 | 3.863292 |
| USP6NL    | -1.35979 | 0.935803 | -5.99379 | 7.55E-06 | 0.000426 | 3.862967 |
| NSMCE1    | -1.27413 | 0.914154 | -5.99133 | 7.59E-06 | 0.000426 | 3.857781 |
| LCE1A     | 1.562584 | -0.76362 | 5.991181 | 7.60E-06 | 0.000426 | 3.857474 |
| EPB41     | 2.339116 | -1.0719  | 5.989013 | 7.63E-06 | 0.000426 | 3.852904 |
| SNORA78   | 2.307577 | -1.13694 | 5.988662 | 7.64E-06 | 0.000426 | 3.852165 |
| GPR150    | 1.719091 | -0.8741  | 5.986663 | 7.67E-06 | 0.000427 | 3.847948 |
| BIN2      | -1.33585 | 1.072423 | -5.9819  | 7.75E-06 | 0.000429 | 3.837896 |
| C1orf162  | -1.73085 | 1.003299 | -5.98185 | 7.75E-06 | 0.000429 | 3.837794 |
| ZNF7      | -0.99548 | 0.628817 | -5.97639 | 7.85E-06 | 0.000433 | 3.826271 |
| TAS2R4    | 1.513968 | -1.10168 | 5.969302 | 7.97E-06 | 0.000439 | 3.811318 |
| SNX2      | -1.39524 | 0.873938 | -5.96739 | 8.00E-06 | 0.000439 | 3.807278 |
| TM6SF2    | 2.217823 | -1.13785 | 5.965009 | 8.04E-06 | 0.00044  | 3.802255 |
| BECN1     | -0.79384 | 0.556907 | -5.9582  | 8.17E-06 | 0.000442 | 3.787883 |
| PNN       | -1.33329 | 1.111452 | -5.95761 | 8.18E-06 | 0.000442 | 3.786623 |
| ARRDC1    | -1.49203 | 1.15327  | -5.9557  | 8.21E-06 | 0.000442 | 3.782594 |
| FCHSD1    | 1.545255 | -0.88806 | 5.954461 | 8.23E-06 | 0.000442 | 3.779974 |
| FATE1     | 1.192653 | -0.35027 | 5.954037 | 8.24E-06 | 0.000442 | 3.779079 |
| ACTR10    | -1.44284 | 0.611935 | -5.95402 | 8.24E-06 | 0.000442 | 3.77905  |
| ANKRD18A  | 2.233204 | -1.20314 | 5.953897 | 8.24E-06 | 0.000442 | 3.778782 |
| ATF6B     | -1.005   | 0.612525 | -5.95029 | 8.31E-06 | 0.000445 | 3.77116  |
| TMEM9B    | -1.20722 | 0.436063 | -5.94888 | 8.33E-06 | 0.000445 | 3.768173 |
| LOC643661 | 1.215965 | -0.54809 | 5.946451 | 8.38E-06 | 0.000446 | 3.763045 |
| LAMB2     | 1.877547 | -0.74146 | 5.944357 | 8.42E-06 | 0.000447 | 3.758619 |
| CLDN7     | 1.397562 | -0.97689 | 5.93272  | 8.63E-06 | 0.000456 | 3.734007 |
| AP1G2     | -0.87302 | 0.737844 | -5.93228 | 8.64E-06 | 0.000456 | 3.733071 |
| GPR153    | 1.375252 | -1.00339 | 5.930988 | 8.67E-06 | 0.000456 | 3.730343 |
| ESRP2     | 1.761751 | -0.79784 | 5.930153 | 8.68E-06 | 0.000456 | 3.728576 |
| TM7SF3    | -1.10482 | 0.54227  | -5.92815 | 8.72E-06 | 0.000456 | 3.724346 |
| NPR1      | 0.918256 | -0.68747 | 5.927371 | 8.74E-06 | 0.000456 | 3.72269  |

|          |          |          |          |          |          |          |
|----------|----------|----------|----------|----------|----------|----------|
| SPATA22  | 2.414857 | -1.43981 | 5.923388 | 8.81E-06 | 0.000458 | 3.714258 |
| TIRAP    | -0.78693 | 0.502678 | -5.92331 | 8.81E-06 | 0.000458 | 3.714087 |
| ZNF282   | -2.17518 | 1.616556 | -5.92018 | 8.87E-06 | 0.000459 | 3.707478 |
| FCER1G   | -1.83157 | 1.254895 | -5.92017 | 8.88E-06 | 0.000459 | 3.70745  |
| TSPAN14  | -1.86268 | 1.339552 | -5.91672 | 8.94E-06 | 0.00046  | 3.700149 |
| RHOU     | -1.48391 | 0.469668 | -5.91606 | 8.96E-06 | 0.00046  | 3.698734 |
| LRTM1    | 1.733459 | -1.19652 | 5.913064 | 9.01E-06 | 0.00046  | 3.692398 |
| C9       | 3.214078 | -1.73719 | 5.912831 | 9.02E-06 | 0.00046  | 3.691905 |
| KCNT1    | 1.13679  | -0.66498 | 5.912739 | 9.02E-06 | 0.00046  | 3.691709 |
| PLXNA3   | 1.491658 | -1.03358 | 5.905737 | 9.16E-06 | 0.000466 | 3.676875 |
| TIPRL    | -1.04311 | 0.49888  | -5.89764 | 9.33E-06 | 0.000473 | 3.659719 |
| GJD3     | 1.670116 | -0.91379 | 5.896138 | 9.36E-06 | 0.000474 | 3.656528 |
| TRAPPC6B | -1.39244 | 0.692331 | -5.89473 | 9.39E-06 | 0.000474 | 3.65355  |
| PARP6    | -0.78112 | 0.491368 | -5.89263 | 9.43E-06 | 0.000474 | 3.649093 |
| PARVG    | -0.9608  | 0.533334 | -5.89128 | 9.46E-06 | 0.000474 | 3.646228 |
| TRNAU1AF | -1.09293 | 0.510433 | -5.89037 | 9.48E-06 | 0.000474 | 3.644296 |
| WDR93    | 1.936703 | -1.10591 | 5.888659 | 9.51E-06 | 0.000474 | 3.640667 |
| LRRC16B  | 1.151813 | -0.32931 | 5.888422 | 9.52E-06 | 0.000474 | 3.640164 |
| ATAT1    | -1.02287 | 0.810954 | -5.886   | 9.57E-06 | 0.000476 | 3.635028 |
| ZNF134   | -1.39678 | 1.187245 | -5.88387 | 9.61E-06 | 0.000477 | 3.630502 |
| IGF2-AS  | 1.938083 | -1.05542 | 5.880575 | 9.68E-06 | 0.000479 | 3.623516 |
| PRR5     | 1.934684 | -0.88998 | 5.879573 | 9.70E-06 | 0.000479 | 3.621388 |
| MYBL1    | 0.950571 | -0.45904 | 5.877519 | 9.75E-06 | 0.000479 | 3.617029 |
| CCDC89   | 1.209586 | -0.44453 | 5.958719 | 1.01E-05 | 0.000486 | 3.616326 |
| SETD8    | -1.86854 | 1.225524 | -5.87604 | 9.78E-06 | 0.000479 | 3.613888 |
| CTR9     | -0.96213 | 0.65895  | -5.87554 | 9.79E-06 | 0.000479 | 3.612824 |
| C19orf77 | 2.846184 | -0.83301 | 5.874803 | 9.81E-06 | 0.000479 | 3.611263 |
| RASAL1   | 1.437693 | -1.02828 | 5.873989 | 9.82E-06 | 0.000479 | 3.609536 |
| UBB      | 2.546752 | -1.04755 | 5.867417 | 9.97E-06 | 0.000482 | 3.595581 |
| FOXRED1  | -0.94663 | 0.733837 | -5.86716 | 9.97E-06 | 0.000482 | 3.595038 |
| PRAP1    | 1.956645 | -1.0017  | 5.866712 | 9.98E-06 | 0.000482 | 3.594083 |
| PRSS30P  | 1.862865 | -0.62069 | 5.866672 | 9.98E-06 | 0.000482 | 3.593999 |
| DLD      | -1.19741 | 0.448661 | -5.8571  | 1.02E-05 | 0.000487 | 3.573663 |
| ATF2     | -0.9229  | 0.662822 | -5.85697 | 1.02E-05 | 0.000487 | 3.573394 |
| STRADA   | -0.93095 | 0.712001 | -5.8561  | 1.02E-05 | 0.000487 | 3.571538 |
| TRPM5    | 2.535577 | -1.21287 | 5.855752 | 1.02E-05 | 0.000487 | 3.570798 |
| RELT     | -1.06911 | 0.595735 | -5.8537  | 1.03E-05 | 0.000489 | 3.566442 |
| FGF17    | 1.123862 | -0.55608 | 5.936896 | 1.06E-05 | 0.000493 | 3.565225 |
| ADORA1   | 2.511818 | -1.45219 | 5.851295 | 1.03E-05 | 0.000489 | 3.561325 |
| HBE1     | 2.394857 | -0.97177 | 5.851285 | 1.03E-05 | 0.000489 | 3.561304 |
| MED22    | -1.12983 | 0.920683 | -5.84817 | 1.04E-05 | 0.00049  | 3.554675 |
| RAB5B    | -1.02321 | 1.001884 | -5.84786 | 1.04E-05 | 0.00049  | 3.554016 |
| CLPTM1   | -1.58599 | 1.338985 | -5.8434  | 1.05E-05 | 0.000493 | 3.544535 |
| TTC8     | -1.81971 | 0.741722 | -5.84206 | 1.05E-05 | 0.000493 | 3.541684 |
| FBXO3    | -1.86471 | 0.827065 | -5.84162 | 1.05E-05 | 0.000493 | 3.540762 |
| E2F4     | -1.57979 | 1.24085  | -5.83902 | 1.06E-05 | 0.000494 | 3.535214 |
| KLRG1    | 1.774652 | -0.94359 | 5.833027 | 1.08E-05 | 0.000498 | 3.522469 |

|           |          |          |          |          |          |          |
|-----------|----------|----------|----------|----------|----------|----------|
| SEC14L4   | 2.271084 | -1.25919 | 5.83279  | 1.08E-05 | 0.000498 | 3.521966 |
| C1orf229  | 1.646792 | -0.89963 | 5.831605 | 1.08E-05 | 0.000498 | 3.519444 |
| NOVA2     | 2.838954 | -1.22053 | 5.828853 | 1.09E-05 | 0.0005   | 3.513586 |
| RASGRP4   | -1.98869 | 1.505799 | -5.82405 | 1.10E-05 | 0.000504 | 3.503353 |
| TMEM110   | -1.97171 | 1.213037 | -5.82076 | 1.10E-05 | 0.000507 | 3.496348 |
| UPK3B     | 1.542059 | -0.75798 | 5.815629 | 1.12E-05 | 0.000511 | 3.485427 |
| SLC39A9   | -1.45272 | 0.668367 | -5.81458 | 1.12E-05 | 0.000511 | 3.483185 |
| KIT       | 1.498189 | -0.8594  | 5.808725 | 1.13E-05 | 0.000515 | 3.470717 |
| TXNDC12   | -1.46495 | 1.083104 | -5.80854 | 1.13E-05 | 0.000515 | 3.470318 |
| FLJ30901  | 2.254035 | -0.98164 | 5.808121 | 1.14E-05 | 0.000515 | 3.46943  |
| FOX51     | 1.927403 | -0.83675 | 5.807505 | 1.14E-05 | 0.000515 | 3.468116 |
| FCAR      | -2.9707  | 1.966001 | -5.80125 | 1.15E-05 | 0.000521 | 3.454779 |
| OIP5-AS1  | 0.863564 | -0.94035 | 5.798151 | 1.16E-05 | 0.000523 | 3.448176 |
| NDUFS2    | -0.96901 | 0.80189  | -5.79581 | 1.17E-05 | 0.000524 | 3.443177 |
| S100PBP   | -1.36621 | 1.181674 | -5.79555 | 1.17E-05 | 0.000524 | 3.442631 |
| ZNF579    | 1.931269 | -1.01014 | 5.79312  | 1.17E-05 | 0.000525 | 3.437447 |
| PPP1R12A  | -1.79472 | 1.157279 | -5.79057 | 1.18E-05 | 0.000527 | 3.431999 |
| HES7      | 2.609795 | -1.27252 | 5.789174 | 1.18E-05 | 0.000527 | 3.429031 |
| C11orf82  | -2.45078 | 1.280467 | -5.78801 | 1.19E-05 | 0.000528 | 3.426538 |
| OPA1      | -1.02868 | 0.357564 | -5.78627 | 1.19E-05 | 0.000528 | 3.42283  |
| DCAF12    | 2.897079 | -1.59702 | 5.785284 | 1.19E-05 | 0.000528 | 3.420731 |
| PSMD12    | -1.13718 | 0.436899 | -5.78412 | 1.20E-05 | 0.000528 | 3.418244 |
| SDHB      | -0.85065 | 0.34327  | -5.78325 | 1.20E-05 | 0.000528 | 3.416379 |
| C9orf66   | -2.08806 | 1.337902 | -5.77671 | 1.22E-05 | 0.000535 | 3.402423 |
| KRT81     | 1.392319 | -0.76562 | 5.774334 | 1.22E-05 | 0.000536 | 3.397358 |
| RP1       | 0.780894 | -0.19048 | 5.854145 | 1.26E-05 | 0.000539 | 3.395605 |
| GADD45A   | -3.02993 | 1.538734 | -5.77184 | 1.23E-05 | 0.000538 | 3.392034 |
| ENTPD4    | -1.05241 | 0.552885 | -5.7687  | 1.24E-05 | 0.000539 | 3.385326 |
| OGG1      | -0.97643 | 0.894762 | -5.76805 | 1.24E-05 | 0.000539 | 3.38394  |
| SARM1     | 0.986662 | -0.32445 | 5.767899 | 1.24E-05 | 0.000539 | 3.383616 |
| SLC6A13   | 0.885365 | -0.43643 | 5.767161 | 1.24E-05 | 0.000539 | 3.382039 |
| POLM      | -0.96173 | 0.647197 | -5.766   | 1.25E-05 | 0.000539 | 3.379553 |
| COL27A1   | 1.390786 | -0.71595 | 5.765479 | 1.25E-05 | 0.000539 | 3.378446 |
| DTX2P1-UF | -0.81053 | 0.534331 | -5.76411 | 1.25E-05 | 0.000539 | 3.375529 |
| ADRA1D    | 1.629769 | -0.9444  | 5.762514 | 1.26E-05 | 0.000539 | 3.372112 |
| HEXDC     | -1.15365 | 0.810822 | -5.76099 | 1.26E-05 | 0.000539 | 3.368858 |
| DIP2B     | -1.78551 | 1.252113 | -5.75932 | 1.27E-05 | 0.00054  | 3.365289 |
| NEO1      | 1.376015 | -0.94082 | 5.838886 | 1.30E-05 | 0.00054  | 3.364233 |
| GTF2E2    | -1.17346 | 0.670661 | -5.75826 | 1.27E-05 | 0.00054  | 3.363022 |
| C4orf49   | 2.737244 | -1.55409 | 5.929306 | 1.34E-05 | 0.00055  | 3.362695 |
| DNAH1     | -0.84653 | 0.717037 | -5.75695 | 1.27E-05 | 0.00054  | 3.36023  |
| VTI1A     | -1.48132 | 1.017721 | -5.75608 | 1.27E-05 | 0.00054  | 3.358359 |
| WDR73     | -0.80979 | 0.459795 | -5.75535 | 1.28E-05 | 0.00054  | 3.356805 |
| EVPL      | 1.643463 | -0.83872 | 5.754052 | 1.28E-05 | 0.00054  | 3.354027 |
| FIG4      | -1.96399 | 0.863905 | -5.75279 | 1.28E-05 | 0.00054  | 3.351321 |
| LUZP1     | -1.26418 | 0.460831 | -5.75213 | 1.29E-05 | 0.00054  | 3.349915 |
| C16orf87  | -0.84411 | 0.257505 | -5.75157 | 1.29E-05 | 0.00054  | 3.348721 |

|           |          |          |          |          |          |          |
|-----------|----------|----------|----------|----------|----------|----------|
| CTAGE15P  | -1.13369 | 0.381909 | -5.74954 | 1.29E-05 | 0.00054  | 3.344392 |
| ZDHC12    | -1.29371 | 0.971606 | -5.74839 | 1.30E-05 | 0.00054  | 3.341923 |
| CEACAM21  | -1.6899  | 1.167726 | -5.74775 | 1.30E-05 | 0.00054  | 3.340555 |
| NAT10     | 2.293908 | -0.92869 | 5.747037 | 1.30E-05 | 0.00054  | 3.339028 |
| DNAJB2    | 1.910756 | -0.81827 | 5.74662  | 1.30E-05 | 0.00054  | 3.338138 |
| MAPK6     | -1.41511 | 0.245696 | -5.74361 | 1.31E-05 | 0.000542 | 3.331705 |
| MACROD1   | 0.942541 | -0.66845 | 5.741619 | 1.32E-05 | 0.000543 | 3.327441 |
| AGPAT6    | -1.7212  | 1.039859 | -5.73651 | 1.33E-05 | 0.000548 | 3.316521 |
| KLHL6     | -1.1427  | 0.772255 | -5.73298 | 1.34E-05 | 0.00055  | 3.308957 |
| CAHM      | -1.21991 | 0.730845 | -5.73282 | 1.34E-05 | 0.00055  | 3.30861  |
| SENP3     | -0.69113 | 0.507548 | -5.73112 | 1.35E-05 | 0.00055  | 3.304975 |
| PORCN     | 2.220416 | -1.06898 | 5.729688 | 1.35E-05 | 0.00055  | 3.301911 |
| HK3       | -2.98739 | 1.747799 | -5.72807 | 1.36E-05 | 0.00055  | 3.298456 |
| LOC100133 | -0.9366  | 0.330466 | -5.72791 | 1.36E-05 | 0.00055  | 3.29811  |
| TCTA      | -1.13416 | 0.663963 | -5.72449 | 1.37E-05 | 0.000553 | 3.290783 |
| FANCL     | 1.367181 | -0.9111  | 5.723667 | 1.37E-05 | 0.000553 | 3.289021 |
| CASC4     | -1.41639 | 0.858104 | -5.7227  | 1.37E-05 | 0.000553 | 3.286956 |
| HCRTR1    | 1.764113 | -1.02423 | 5.721713 | 1.38E-05 | 0.000553 | 3.284837 |
| HBD       | 4.394049 | -1.96101 | 5.79214  | 1.44E-05 | 0.000567 | 3.276272 |
| DDX59     | -1.68971 | 0.775754 | -5.71756 | 1.39E-05 | 0.000557 | 3.27594  |
| ENTPD7    | -2.96292 | 1.251877 | -5.71684 | 1.39E-05 | 0.000557 | 3.274401 |
| FRAS1     | 1.996331 | -1.2428  | 5.71632  | 1.39E-05 | 0.000557 | 3.273286 |
| BCAP29    | -1.53491 | 0.742394 | -5.71432 | 1.40E-05 | 0.000558 | 3.269002 |
| LOC100527 | -0.914   | 0.789628 | -5.71324 | 1.40E-05 | 0.000558 | 3.266687 |
| MMGT1     | 0.769485 | -0.83251 | 5.709869 | 1.41E-05 | 0.000561 | 3.259466 |
| ADAM9     | -2.25126 | 1.185122 | -5.78706 | 1.45E-05 | 0.000568 | 3.257438 |
| NEDD4     | -2.31045 | 0.994926 | -5.70541 | 1.43E-05 | 0.000565 | 3.249917 |
| SMARCD1   | -1.14239 | 0.816414 | -5.70502 | 1.43E-05 | 0.000565 | 3.249076 |
| MGC42157  | 1.275147 | -0.83607 | 5.703433 | 1.43E-05 | 0.000566 | 3.245672 |
| ERICH1    | -1.36465 | 0.979642 | -5.69954 | 1.44E-05 | 0.000568 | 3.237324 |
| ZMAT2     | -1.40956 | 1.121864 | -5.69848 | 1.45E-05 | 0.000568 | 3.235058 |
| MBTPS1    | -0.82907 | 0.709739 | -5.69688 | 1.45E-05 | 0.000568 | 3.231624 |
| PPM1N     | -1.73336 | 0.567516 | -5.6954  | 1.46E-05 | 0.000568 | 3.228453 |
| DBNDD2    | 0.797641 | -0.27702 | 5.693697 | 1.46E-05 | 0.000568 | 3.224796 |
| HAND1     | 1.182384 | -0.72134 | 5.692652 | 1.47E-05 | 0.000568 | 3.222555 |
| TAF7      | -1.6756  | 0.600704 | -5.69234 | 1.47E-05 | 0.000568 | 3.221875 |
| KNDC1     | 1.929031 | -1.26863 | 5.691951 | 1.47E-05 | 0.000568 | 3.221051 |
| DHH       | 1.564445 | -0.98919 | 5.690875 | 1.47E-05 | 0.000568 | 3.218744 |
| FAM117A   | 1.187756 | -0.83158 | 5.690242 | 1.47E-05 | 0.000568 | 3.217385 |
| RHBDL1    | 1.301382 | -0.68943 | 5.689876 | 1.48E-05 | 0.000568 | 3.216601 |
| STAR      | -1.0679  | 0.531897 | -5.68887 | 1.48E-05 | 0.000568 | 3.214442 |
| HNRPDL    | -1.38417 | 0.882238 | -5.68462 | 1.49E-05 | 0.000573 | 3.205329 |
| SCO1      | -0.99709 | 0.465817 | -5.6822  | 1.50E-05 | 0.000575 | 3.200131 |
| DPP3      | -1.06803 | 0.542606 | -5.68063 | 1.51E-05 | 0.000575 | 3.196765 |
| KRT85     | 1.596188 | -0.82411 | 5.67988  | 1.51E-05 | 0.000575 | 3.195151 |
| FAM206A   | -1.36187 | 0.637367 | -5.67459 | 1.53E-05 | 0.000581 | 3.183796 |
| CYP2B6    | 2.074828 | -1.18719 | 5.672499 | 1.53E-05 | 0.000583 | 3.179306 |

|           |          |          |          |          |          |          |
|-----------|----------|----------|----------|----------|----------|----------|
| PRODH2    | 1.304095 | -0.84218 | 5.670184 | 1.54E-05 | 0.000584 | 3.174335 |
| COX6B2    | 1.983046 | -1.2662  | 5.668057 | 1.55E-05 | 0.000586 | 3.169768 |
| EML2      | -1.27282 | 0.991543 | -5.66748 | 1.55E-05 | 0.000586 | 3.168536 |
| PDZK1IP1  | 3.19503  | -1.32117 | 5.665456 | 1.56E-05 | 0.000586 | 3.16418  |
| RSRC2     | -0.94478 | 0.42119  | -5.66533 | 1.56E-05 | 0.000586 | 3.163912 |
| RHEB      | -0.95285 | 0.707146 | -5.66476 | 1.56E-05 | 0.000586 | 3.162689 |
| TMEM80    | -0.95219 | 0.516385 | -5.66305 | 1.57E-05 | 0.000587 | 3.159019 |
| MFSD11    | -1.17985 | 0.324017 | -5.66215 | 1.57E-05 | 0.000587 | 3.15708  |
| FAM190B   | 1.041866 | -1.28147 | 5.661493 | 1.57E-05 | 0.000587 | 3.155667 |
| BABAM1    | 1.153693 | -0.77012 | 5.659318 | 1.58E-05 | 0.000587 | 3.150994 |
| RUSC1     | 0.90873  | -0.47006 | 5.658479 | 1.58E-05 | 0.000587 | 3.149191 |
| LRRC70    | -2.54668 | 1.135341 | -5.73455 | 1.63E-05 | 0.000595 | 3.148903 |
| ADAT1     | -0.99847 | 0.84542  | -5.65762 | 1.59E-05 | 0.000587 | 3.147336 |
| USP48     | -0.67939 | 0.421018 | -5.65757 | 1.59E-05 | 0.000587 | 3.147246 |
| LINC00324 | -0.77145 | 0.47438  | -5.65714 | 1.59E-05 | 0.000587 | 3.146308 |
| MAGEA8    | 2.700117 | -1.46434 | 5.724782 | 1.66E-05 | 0.000601 | 3.137746 |
| ITSN2     | -1.48532 | 1.023583 | -5.64776 | 1.62E-05 | 0.000595 | 3.126141 |
| PREB      | -0.80874 | 0.647331 | -5.64579 | 1.63E-05 | 0.000595 | 3.121906 |
| SCARNA17  | 1.324338 | -1.01849 | 5.645227 | 1.63E-05 | 0.000595 | 3.120704 |
| RAI2      | 1.261902 | -0.42605 | 5.645117 | 1.63E-05 | 0.000595 | 3.120469 |
| ALKBH6    | -0.87669 | 0.549139 | -5.64498 | 1.63E-05 | 0.000595 | 3.120167 |
| PCSK1N    | 1.7648   | -1.06657 | 5.644712 | 1.63E-05 | 0.000595 | 3.119597 |
| ZNF488    | 2.29513  | -1.11591 | 5.641616 | 1.64E-05 | 0.000598 | 3.112938 |
| ANKRD33   | 2.818604 | -1.18478 | 5.640965 | 1.65E-05 | 0.000598 | 3.111538 |
| SFRP2     | 2.940136 | -1.28727 | 5.640006 | 1.65E-05 | 0.000598 | 3.109477 |
| RNFT1     | -1.76429 | 0.857553 | -5.63832 | 1.66E-05 | 0.000599 | 3.105855 |
| NDST2     | -1.28425 | 0.506215 | -5.6355  | 1.67E-05 | 0.000601 | 3.099777 |
| LOC100507 | 2.918938 | -1.15466 | 5.628697 | 1.69E-05 | 0.000609 | 3.085144 |
| FLJ14186  | -2.64378 | 1.338137 | -5.62567 | 1.70E-05 | 0.000612 | 3.078638 |
| SLC34A3   | 2.848028 | -1.25953 | 5.624247 | 1.71E-05 | 0.000613 | 3.075566 |
| CD274     | -2.68558 | 1.561696 | -5.62203 | 1.72E-05 | 0.000614 | 3.070801 |
| KRTAP5-8  | 1.292123 | -0.95992 | 5.621684 | 1.72E-05 | 0.000614 | 3.070049 |
| LY6G6C    | 1.39181  | -0.38625 | 5.617878 | 1.73E-05 | 0.000618 | 3.061853 |
| EGFEM1P   | 1.709276 | -0.96399 | 5.773311 | 1.85E-05 | 0.00064  | 3.060881 |
| TCEAL1    | 1.341275 | -0.81079 | 5.615267 | 1.74E-05 | 0.000621 | 3.05623  |
| WBSCR17   | 1.957825 | -1.29085 | 5.612396 | 1.75E-05 | 0.000623 | 3.050046 |
| UTS2R     | 1.553183 | -0.91566 | 5.611816 | 1.76E-05 | 0.000623 | 3.048797 |
| NPHP1     | 2.035111 | -1.26302 | 5.611096 | 1.76E-05 | 0.000623 | 3.047246 |
| FOXC2     | 2.7926   | -1.20314 | 5.609001 | 1.77E-05 | 0.000625 | 3.042733 |
| MTHFD2    | -2.14907 | 0.686067 | -5.60833 | 1.77E-05 | 0.000625 | 3.041278 |
| SELE      | 1.751562 | -0.57663 | 5.677889 | 1.84E-05 | 0.000639 | 3.040966 |
| HAGHL     | 1.256672 | -0.47379 | 5.606924 | 1.78E-05 | 0.000626 | 3.038256 |
| MKNK1     | -2.43556 | 1.281411 | -5.60518 | 1.78E-05 | 0.000627 | 3.034497 |
| TSPAN5    | 2.883055 | -1.46784 | 5.604049 | 1.79E-05 | 0.000627 | 3.032063 |
| TPD52L2   | -1.80179 | 1.552621 | -5.60117 | 1.80E-05 | 0.000629 | 3.025859 |
| WDFY2     | -1.73903 | 1.248666 | -5.60109 | 1.80E-05 | 0.000629 | 3.025686 |
| TTY12     | 2.462638 | -1.36471 | 5.755147 | 1.92E-05 | 0.000646 | 3.024853 |



|           |          |          |          |          |          |          |
|-----------|----------|----------|----------|----------|----------|----------|
| C2orf3    | 2.573403 | -0.99886 | 5.596784 | 1.82E-05 | 0.000634 | 3.016403 |
| LOC100651 | 1.178239 | -1.18577 | 5.594967 | 1.82E-05 | 0.000636 | 3.012487 |
| PSMD1     | -0.96959 | 0.60071  | -5.59232 | 1.83E-05 | 0.000638 | 3.00677  |
| LMAN2     | -0.81506 | 0.519911 | -5.58974 | 1.84E-05 | 0.00064  | 3.001225 |
| SIRT5     | -1.44663 | 0.750358 | -5.58739 | 1.85E-05 | 0.00064  | 2.996138 |
| NAT14     | 1.858246 | -0.91346 | 5.586909 | 1.86E-05 | 0.00064  | 2.99511  |
| VPS33A    | -0.93413 | 0.718076 | -5.58263 | 1.87E-05 | 0.000645 | 2.985872 |
| MEX3D     | 1.848458 | -0.94225 | 5.580967 | 1.88E-05 | 0.000645 | 2.98229  |
| RAB20     | -2.61401 | 1.512101 | -5.5807  | 1.88E-05 | 0.000645 | 2.981716 |
| LYZL6     | 2.336737 | -1.54114 | 5.737264 | 2.00E-05 | 0.000658 | 2.981589 |
| HOXD4     | 1.162417 | -0.94383 | 5.580109 | 1.88E-05 | 0.000645 | 2.98044  |
| PRKAA1    | -1.16877 | 0.502758 | -5.5798  | 1.89E-05 | 0.000645 | 2.97977  |
| CD53      | -1.32808 | 0.772047 | -5.57853 | 1.89E-05 | 0.000645 | 2.977023 |
| NT5C2     | -2.00189 | 1.416216 | -5.57851 | 1.89E-05 | 0.000645 | 2.976992 |
| ZFP36     | -1.13691 | 0.860597 | -5.57687 | 1.90E-05 | 0.000646 | 2.973455 |
| UBLCP1    | -1.8183  | 1.19812  | -5.57364 | 1.91E-05 | 0.000646 | 2.966478 |
| GDNF      | -1.71007 | 0.377658 | -5.5735  | 1.91E-05 | 0.000646 | 2.966183 |
| SND1      | 1.006749 | -0.64976 | 5.571334 | 1.92E-05 | 0.000646 | 2.961501 |
| LINC00311 | 2.399494 | -1.4518  | 5.571034 | 1.92E-05 | 0.000646 | 2.960854 |
| FAM89A    | -2.82249 | 0.971342 | -5.57102 | 1.92E-05 | 0.000646 | 2.96082  |
| SERPINE1  | 1.226007 | -0.69705 | 5.570822 | 1.92E-05 | 0.000646 | 2.960396 |
| AGGF1     | -1.57693 | 1.032985 | -5.57048 | 1.93E-05 | 0.000646 | 2.959653 |
| C5orf46   | 2.02667  | -0.926   | 5.568006 | 1.94E-05 | 0.000648 | 2.954317 |
| CTAGE9    | -1.41043 | 0.911217 | -5.56687 | 1.94E-05 | 0.000648 | 2.951861 |
| TIMP4     | -1.95618 | 0.373018 | -5.56668 | 1.94E-05 | 0.000648 | 2.951453 |
| MYL12A    | -1.03659 | 0.586682 | -5.56304 | 1.96E-05 | 0.000652 | 2.9436   |
| AHSP      | 4.125032 | -1.82029 | 5.562115 | 1.96E-05 | 0.000652 | 2.941595 |
| C15orf57  | -1.00655 | 0.559459 | -5.56105 | 1.97E-05 | 0.000652 | 2.939291 |
| ACAA1     | -1.54936 | 0.995035 | -5.56015 | 1.97E-05 | 0.000652 | 2.937343 |
| TMEM70    | -1.50476 | 0.388998 | -5.56013 | 1.97E-05 | 0.000652 | 2.937305 |
| KRT31     | 2.252401 | -0.99524 | 5.558971 | 1.98E-05 | 0.000653 | 2.934806 |
| HP        | -2.23603 | 1.823049 | -5.55259 | 2.00E-05 | 0.000658 | 2.921021 |
| SS18L1    | -1.0791  | 0.764093 | -5.5515  | 2.01E-05 | 0.000658 | 2.918655 |
| CCNL1     | -1.74256 | 0.972833 | -5.55079 | 2.01E-05 | 0.000658 | 2.917131 |
| KRTAP4-11 | 1.556762 | -0.7817  | 5.550361 | 2.01E-05 | 0.000658 | 2.916204 |
| C21orf54  | 1.135177 | -0.25208 | 5.617268 | 2.10E-05 | 0.00067  | 2.915451 |
| BDKRB2    | 1.216339 | -0.87069 | 5.548262 | 2.02E-05 | 0.000658 | 2.911667 |
| HPGD      | -2.63463 | 1.448555 | -5.5482  | 2.02E-05 | 0.000658 | 2.911543 |
| GPR119    | 1.60437  | -0.84461 | 5.548171 | 2.02E-05 | 0.000658 | 2.911471 |
| LPO       | 2.427171 | -1.48813 | 5.548056 | 2.02E-05 | 0.000658 | 2.911221 |
| C12orf10  | 1.045242 | -0.60136 | 5.547878 | 2.03E-05 | 0.000658 | 2.910838 |
| AZIN1     | -1.01789 | 0.297028 | -5.54699 | 2.03E-05 | 0.000658 | 2.908913 |
| DRD3      | 1.57905  | -1.16257 | 5.541262 | 2.06E-05 | 0.000666 | 2.896536 |
| TJP3      | 1.586274 | -0.76801 | 5.54013  | 2.06E-05 | 0.000666 | 2.894089 |
| FGF3      | 2.329121 | -1.036   | 5.539037 | 2.07E-05 | 0.000666 | 2.891725 |
| CREB3L1   | 1.838268 | -0.9384  | 5.538778 | 2.07E-05 | 0.000666 | 2.891166 |
| ZDHHC8    | 2.139574 | -1.0207  | 5.537433 | 2.07E-05 | 0.000666 | 2.888257 |

|          |          |          |          |          |          |          |
|----------|----------|----------|----------|----------|----------|----------|
| ITIH4    | -1.86261 | 0.79985  | -5.53743 | 2.07E-05 | 0.000666 | 2.888252 |
| PPM1F    | -1.74831 | 1.259126 | -5.53325 | 2.09E-05 | 0.00067  | 2.879216 |
| P2RY13   | -2.37343 | 1.605719 | -5.533   | 2.09E-05 | 0.00067  | 2.878662 |
| SLC24A6  | -0.97032 | 0.748298 | -5.53126 | 2.10E-05 | 0.000671 | 2.874911 |
| C1orf64  | 2.540625 | -1.2817  | 5.5296   | 2.11E-05 | 0.000672 | 2.871315 |
| MLKL     | -2.58299 | 1.658824 | -5.52859 | 2.11E-05 | 0.000673 | 2.869128 |
| ABHD16A  | -1.11517 | 0.839161 | -5.52708 | 2.12E-05 | 0.000674 | 2.86586  |
| ATXN1L   | 1.942892 | -0.91871 | 5.525912 | 2.13E-05 | 0.000675 | 2.863337 |
| LRRC57   | -1.13924 | 0.378261 | -5.52042 | 2.15E-05 | 0.00068  | 2.851462 |
| HHEX     | -2.08569 | 0.996832 | -5.5193  | 2.16E-05 | 0.00068  | 2.849031 |
| OR10H2   | 2.006085 | -0.92518 | 5.519108 | 2.16E-05 | 0.00068  | 2.848613 |
| FLJ35390 | 1.693213 | -0.80266 | 5.519077 | 2.16E-05 | 0.00068  | 2.848546 |
| SULF2    | 3.146763 | -0.96905 | 5.51883  | 2.16E-05 | 0.00068  | 2.848012 |
| CCDC67   | 1.405869 | -0.34814 | 5.517961 | 2.17E-05 | 0.00068  | 2.846131 |
| LNX1     | 3.059455 | -1.61115 | 5.514624 | 2.18E-05 | 0.000684 | 2.838907 |
| LZIC     | -1.27584 | 0.690683 | -5.51133 | 2.20E-05 | 0.000688 | 2.831775 |
| SMUG1    | -1.03903 | 0.388501 | -5.51017 | 2.20E-05 | 0.000688 | 2.829268 |
| ACCN4    | 2.098678 | -1.327   | 5.509802 | 2.21E-05 | 0.000688 | 2.828466 |
| ZNF660   | 1.067542 | -0.28243 | 5.508076 | 2.21E-05 | 0.00069  | 2.824729 |
| COX6A2   | 1.197159 | -0.82056 | 5.504531 | 2.23E-05 | 0.00069  | 2.817052 |
| GHSR     | 1.383515 | -0.72175 | 5.504032 | 2.23E-05 | 0.00069  | 2.81597  |
| ADAMTS18 | 1.080626 | -0.48324 | 5.654276 | 2.37E-05 | 0.000702 | 2.815385 |
| KRT71    | 1.634974 | -1.12753 | 5.503638 | 2.24E-05 | 0.00069  | 2.815117 |
| HCN2     | 1.29316  | -0.72277 | 5.503039 | 2.24E-05 | 0.00069  | 2.81382  |
| C17orf72 | 1.853708 | -0.9138  | 5.502754 | 2.24E-05 | 0.00069  | 2.813203 |
| EXOC3    | -0.98016 | 0.618438 | -5.50208 | 2.24E-05 | 0.00069  | 2.811749 |
| SNRNP35  | -0.98471 | 0.68447  | -5.50199 | 2.24E-05 | 0.00069  | 2.811551 |
| TUBGCP3  | -1.16046 | 0.738683 | -5.50194 | 2.25E-05 | 0.00069  | 2.811434 |
| CECR2    | 2.04498  | -0.957   | 5.501697 | 2.25E-05 | 0.00069  | 2.810913 |
| MAFK     | -0.72532 | 0.546653 | -5.49916 | 2.26E-05 | 0.000693 | 2.805415 |
| SUOX     | -1.41687 | 1.022413 | -5.49818 | 2.26E-05 | 0.000693 | 2.803291 |
| DUX4     | 3.1213   | -1.4558  | 5.495971 | 2.28E-05 | 0.000696 | 2.798507 |
| GPR31    | 1.640488 | -0.83432 | 5.494775 | 2.28E-05 | 0.000696 | 2.795915 |
| OTOP1    | -1.49606 | 0.513288 | -5.49312 | 2.29E-05 | 0.000697 | 2.792319 |
| STAG3L2  | 1.887219 | -0.86312 | 5.492867 | 2.29E-05 | 0.000697 | 2.79178  |
| DTNBP1   | -0.85455 | 0.407835 | -5.48925 | 2.31E-05 | 0.000698 | 2.783934 |
| OPRL1    | 1.10702  | -0.39156 | 5.487962 | 2.32E-05 | 0.000698 | 2.781148 |
| HTRA2    | -0.79946 | 0.338246 | -5.48789 | 2.32E-05 | 0.000698 | 2.780999 |
| FLJ32742 | 2.329204 | -0.96453 | 5.487865 | 2.32E-05 | 0.000698 | 2.780939 |
| GPAA1    | -1.16261 | 0.898405 | -5.48746 | 2.32E-05 | 0.000698 | 2.780056 |
| FOXK2    | -0.93619 | 0.857195 | -5.48742 | 2.32E-05 | 0.000698 | 2.779967 |
| DPY19L3  | -2.74924 | 1.449728 | -5.48739 | 2.32E-05 | 0.000698 | 2.779917 |
| VPS39    | -1.33834 | 0.92829  | -5.4854  | 2.33E-05 | 0.0007   | 2.775597 |
| RFNG     | -1.31272 | 1.071368 | -5.48449 | 2.33E-05 | 0.000701 | 2.773625 |
| SF3B4    | -2.16494 | 1.728558 | -5.48236 | 2.35E-05 | 0.000702 | 2.769006 |
| FAM109B  | 1.35853  | -0.68886 | 5.481668 | 2.35E-05 | 0.000702 | 2.767504 |
| UNC13A   | 0.853165 | -0.18247 | 5.551311 | 2.42E-05 | 0.000712 | 2.767477 |

|           |          |          |          |          |          |          |
|-----------|----------|----------|----------|----------|----------|----------|
| PCDHB4    | 2.502525 | -1.13486 | 5.480421 | 2.36E-05 | 0.000702 | 2.7648   |
| CNTNAP1   | 2.224779 | -1.00038 | 5.480261 | 2.36E-05 | 0.000702 | 2.764453 |
| LRRFIP2   | -1.59907 | 1.074852 | -5.47972 | 2.36E-05 | 0.000702 | 2.763274 |
| PIAS1     | -1.33324 | 1.205585 | -5.4794  | 2.36E-05 | 0.000702 | 2.76258  |
| KRTAP11-1 | 1.701154 | -0.76272 | 5.479108 | 2.36E-05 | 0.000702 | 2.761951 |
| TTC9B     | 2.663159 | -1.1453  | 5.477656 | 2.37E-05 | 0.000702 | 2.758803 |
| C8orf4    | 2.675761 | -1.56578 | 5.476807 | 2.38E-05 | 0.000702 | 2.756961 |
| NDUFC2    | -1.20751 | 0.557683 | -5.47515 | 2.38E-05 | 0.000704 | 2.753377 |
| IRF9      | -1.09694 | 0.960942 | -5.46701 | 2.43E-05 | 0.000714 | 2.735716 |
| GPX3      | -1.30312 | 0.502661 | -5.46403 | 2.44E-05 | 0.000717 | 2.729247 |
| TSN       | -0.7534  | 0.37901  | -5.46396 | 2.44E-05 | 0.000717 | 2.729091 |
| CDX4      | 2.121639 | -1.66718 | 5.463483 | 2.45E-05 | 0.000717 | 2.728054 |
| ZKSCAN3   | -0.95867 | 0.742149 | -5.46196 | 2.46E-05 | 0.000718 | 2.724749 |
| FBXO8     | 1.301815 | -0.98321 | 5.460925 | 2.46E-05 | 0.000719 | 2.722501 |
| SPATS1    | 2.090453 | -1.31404 | 5.607747 | 2.61E-05 | 0.000737 | 2.721811 |
| TFF1      | 2.271841 | -0.96357 | 5.460133 | 2.47E-05 | 0.000719 | 2.720781 |
| MXD3      | -2.71357 | 1.828139 | -5.45932 | 2.47E-05 | 0.000719 | 2.719025 |
| RAB8B     | -1.7655  | 0.90865  | -5.4591  | 2.47E-05 | 0.000719 | 2.71854  |
| DPH3      | -1.31934 | 0.608351 | -5.45785 | 2.48E-05 | 0.000719 | 2.715832 |
| CYP4F30P  | 1.212632 | -0.6564  | 5.457432 | 2.48E-05 | 0.000719 | 2.714919 |
| TOX3      | 1.815024 | -0.82212 | 5.456692 | 2.49E-05 | 0.000719 | 2.713313 |
| DACH1     | -3.41109 | 1.627958 | -5.45587 | 2.49E-05 | 0.000719 | 2.711526 |
| LOC399744 | -2.07242 | 1.357723 | -5.45486 | 2.50E-05 | 0.000719 | 2.709342 |
| WDR69     | 1.419251 | -0.36822 | 5.454811 | 2.50E-05 | 0.000719 | 2.709228 |
| COPA      | -1.45148 | 1.172779 | -5.45414 | 2.50E-05 | 0.000719 | 2.707771 |
| IL25      | -1.77537 | 0.348105 | -5.45181 | 2.51E-05 | 0.000722 | 2.702723 |
| OPLAH     | -2.47896 | 1.652285 | -5.44713 | 2.54E-05 | 0.000728 | 2.692553 |
| ELF5      | 1.793704 | -0.88681 | 5.446827 | 2.54E-05 | 0.000728 | 2.691889 |
| COPB2     | -0.82358 | 0.539396 | -5.44613 | 2.54E-05 | 0.000728 | 2.690371 |
| TIAM1     | 1.758613 | -0.82108 | 5.442906 | 2.56E-05 | 0.000732 | 2.683373 |
| PRAMEF1   | 1.969584 | -1.23851 | 5.441433 | 2.57E-05 | 0.000734 | 2.680172 |
| PYY       | 1.522651 | -0.82465 | 5.438889 | 2.59E-05 | 0.000737 | 2.674645 |
| ASB8      | -1.34667 | 1.120698 | -5.43766 | 2.59E-05 | 0.000737 | 2.671981 |
| OGT       | -0.97169 | 0.679067 | -5.43739 | 2.60E-05 | 0.000737 | 2.671381 |
| FAM177A1  | -1.45368 | 0.769139 | -5.43682 | 2.60E-05 | 0.000737 | 2.670157 |
| PRIMA1    | 2.867022 | -1.19963 | 5.435054 | 2.61E-05 | 0.000737 | 2.666311 |
| UGT2B10   | 1.559501 | -0.91947 | 5.434955 | 2.61E-05 | 0.000737 | 2.666096 |
| CORT      | 2.047914 | -0.93557 | 5.434079 | 2.61E-05 | 0.000737 | 2.664192 |
| BCL2      | 1.857626 | -0.92562 | 5.433021 | 2.62E-05 | 0.000737 | 2.661892 |
| DKFZP434C | -1.31903 | 0.553122 | -5.43272 | 2.62E-05 | 0.000737 | 2.661247 |
| KRT1      | 3.722917 | -1.42035 | 5.493666 | 2.74E-05 | 0.000747 | 2.658156 |
| MGC4473   | 2.584583 | -1.10269 | 5.428513 | 2.65E-05 | 0.000743 | 2.652093 |
| LRRC29    | -0.90067 | 0.873826 | -5.42612 | 2.66E-05 | 0.000746 | 2.646886 |
| EVX1      | 2.56077  | -1.11179 | 5.425326 | 2.67E-05 | 0.000746 | 2.645165 |
| ADRB3     | 1.963401 | -0.81435 | 5.424457 | 2.67E-05 | 0.000747 | 2.643275 |
| TXNL4B    | -1.34277 | 0.755163 | -5.42355 | 2.68E-05 | 0.000747 | 2.641312 |
| IMPAD1    | -1.03001 | 0.40195  | -5.42166 | 2.69E-05 | 0.000747 | 2.637191 |

|           |          |          |          |          |          |          |
|-----------|----------|----------|----------|----------|----------|----------|
| WNT7A     | 1.215851 | -0.65309 | 5.488796 | 2.77E-05 | 0.000747 | 2.636431 |
| STK19     | -0.66402 | 0.442176 | -5.42124 | 2.69E-05 | 0.000747 | 2.63627  |
| LOC100133 | -1.07232 | 0.730274 | -5.42099 | 2.69E-05 | 0.000747 | 2.63574  |
| SCGB3A2   | 2.350951 | -1.0324  | 5.419803 | 2.70E-05 | 0.000747 | 2.633154 |
| LYPLA2    | -1.02792 | 0.8929   | -5.41866 | 2.71E-05 | 0.000747 | 2.63066  |
| GPR142    | 2.27554  | -1.02548 | 5.418172 | 2.71E-05 | 0.000747 | 2.629607 |
| ACER1     | 2.043994 | -0.94213 | 5.417907 | 2.71E-05 | 0.000747 | 2.62903  |
| TNNI1     | 1.793884 | -0.785   | 5.417149 | 2.72E-05 | 0.000747 | 2.627381 |
| RGL4      | -2.04251 | 1.177885 | -5.41563 | 2.73E-05 | 0.000747 | 2.624088 |
| FRG1      | -1.33239 | 0.962324 | -5.41497 | 2.73E-05 | 0.000747 | 2.622632 |
| TAC4      | 1.699127 | -0.98376 | 5.414933 | 2.73E-05 | 0.000747 | 2.622561 |
| LOC100653 | 1.4595   | -0.73792 | 5.41328  | 2.74E-05 | 0.000747 | 2.618965 |
| LOC100133 | 3.03747  | -1.21278 | 5.412183 | 2.75E-05 | 0.000747 | 2.616578 |
| C15orf33  | -1.34327 | 0.113008 | -5.41004 | 2.76E-05 | 0.000747 | 2.611918 |
| LOC100507 | -2.06788 | 0.704548 | -5.47682 | 2.84E-05 | 0.000749 | 2.611285 |
| C9orf103  | -2.35414 | 0.815761 | -5.40915 | 2.77E-05 | 0.000747 | 2.609985 |
| TTI2      | -0.84955 | 0.581999 | -5.40809 | 2.77E-05 | 0.000747 | 2.607673 |
| CHRND     | 1.00149  | -0.71264 | 5.407988 | 2.77E-05 | 0.000747 | 2.607452 |
| TRPC4AP   | -0.89653 | 0.711692 | -5.40738 | 2.78E-05 | 0.000747 | 2.606131 |
| TUBA1C    | -1.39455 | 1.226732 | -5.40705 | 2.78E-05 | 0.000747 | 2.605409 |
| C1GALT1C  | -1.94454 | 0.671819 | -5.40664 | 2.78E-05 | 0.000747 | 2.604521 |
| TM2D1     | -1.41038 | 0.711184 | -5.40628 | 2.78E-05 | 0.000747 | 2.603733 |
| CYP11B1   | 1.685945 | -0.82614 | 5.405968 | 2.79E-05 | 0.000747 | 2.603055 |
| C6orf120  | -1.08802 | 0.666933 | -5.40555 | 2.79E-05 | 0.000747 | 2.60214  |
| TBC1D26   | 1.531424 | -0.70682 | 5.405257 | 2.79E-05 | 0.000747 | 2.601507 |
| STOM      | -2.32635 | 1.14522  | -5.40464 | 2.79E-05 | 0.000747 | 2.600174 |
| SRRD      | 2.031075 | -1.14776 | 5.40308  | 2.80E-05 | 0.000747 | 2.596769 |
| NKX1-2    | 2.759541 | -1.16983 | 5.402984 | 2.80E-05 | 0.000747 | 2.596561 |
| SLC35B1   | -0.70992 | 0.375616 | -5.40252 | 2.81E-05 | 0.000747 | 2.595548 |
| EWSR1     | -1.22394 | 0.833419 | -5.40222 | 2.81E-05 | 0.000747 | 2.594896 |
| KCNQ3     | 2.672969 | -1.12952 | 5.40163  | 2.81E-05 | 0.000747 | 2.593613 |
| CHCHD1    | -1.35174 | 0.888562 | -5.4011  | 2.82E-05 | 0.000747 | 2.592451 |
| DLGAP3    | 1.686968 | -0.747   | 5.401009 | 2.82E-05 | 0.000747 | 2.592262 |
| GATA2     | 1.950451 | -0.8231  | 5.400104 | 2.82E-05 | 0.000747 | 2.590291 |
| TRIM2     | 2.10385  | -1.24682 | 5.399775 | 2.82E-05 | 0.000747 | 2.589576 |
| ASCC1     | -1.35662 | 0.913623 | -5.39967 | 2.83E-05 | 0.000747 | 2.589349 |
| SRRM1     | 0.95009  | -0.85902 | 5.39961  | 2.83E-05 | 0.000747 | 2.589216 |
| NSRP1     | -1.8838  | 1.522938 | -5.39954 | 2.83E-05 | 0.000747 | 2.589071 |
| GBAP1     | -1.5405  | 1.096749 | -5.39924 | 2.83E-05 | 0.000747 | 2.588412 |
| ADCYAP1R  | 1.394215 | -1.02721 | 5.396224 | 2.85E-05 | 0.00075  | 2.581844 |
| CDC123    | -1.25003 | 0.664137 | -5.39495 | 2.86E-05 | 0.000751 | 2.57907  |
| SRPK3     | 1.517052 | -0.97462 | 5.393298 | 2.87E-05 | 0.000752 | 2.575474 |
| LOC645676 | -1.0343  | 0.619397 | -5.39322 | 2.87E-05 | 0.000752 | 2.575312 |
| ASCC2     | 2.227942 | -1.00126 | 5.392213 | 2.87E-05 | 0.000753 | 2.573111 |
| GPC4      | 2.427575 | -1.06932 | 5.386389 | 2.91E-05 | 0.000761 | 2.560426 |
| TRIM55    | 1.417051 | -0.30323 | 5.446531 | 3.04E-05 | 0.000779 | 2.559563 |
| SLC1A7    | 1.114638 | -0.5     | 5.38437  | 2.92E-05 | 0.000761 | 2.556028 |

|           |          |          |          |          |          |          |
|-----------|----------|----------|----------|----------|----------|----------|
| SLC9A8    | -1.48441 | 1.008719 | -5.38429 | 2.92E-05 | 0.000761 | 2.555862 |
| FIBIN     | 1.274263 | -0.76863 | 5.384258 | 2.93E-05 | 0.000761 | 2.555783 |
| PP14571   | 1.355974 | -0.71274 | 5.383978 | 2.93E-05 | 0.000761 | 2.555175 |
| LTA       | 1.939708 | -0.98024 | 5.383555 | 2.93E-05 | 0.000761 | 2.554253 |
| LINC00261 | -1.228   | 0.245601 | -5.38148 | 2.94E-05 | 0.000764 | 2.54974  |
| SRRM3     | 2.114774 | -0.94858 | 5.380356 | 2.95E-05 | 0.000764 | 2.547283 |
| MS4A4A    | -3.23214 | 1.452635 | -5.38    | 2.95E-05 | 0.000764 | 2.546517 |
| SYNGR2    | -1.2372  | 0.554156 | -5.37913 | 2.96E-05 | 0.000765 | 2.544617 |
| DYNC1H1   | 1.092785 | -0.57199 | 5.376543 | 2.98E-05 | 0.000768 | 2.538974 |
| SELV      | 1.033843 | -0.76378 | 5.439315 | 3.08E-05 | 0.000787 | 2.532388 |
| GOSR2     | -1.68798 | 0.857517 | -5.37303 | 3.00E-05 | 0.000773 | 2.531319 |
| EXOC3L2   | 1.931929 | -0.89849 | 5.370907 | 3.01E-05 | 0.000776 | 2.526689 |
| ADM       | -2.26066 | 1.614589 | -5.36825 | 3.03E-05 | 0.000779 | 2.520904 |
| SETDB1    | -0.88059 | 0.596078 | -5.36784 | 3.04E-05 | 0.000779 | 2.520012 |
| SNX1      | -1.11926 | 0.629802 | -5.36635 | 3.05E-05 | 0.00078  | 2.516766 |
| GPR15     | 2.848569 | -1.1067  | 5.364394 | 3.06E-05 | 0.000783 | 2.51249  |
| KRTAP2-4  | 1.926701 | -0.89356 | 5.362234 | 3.07E-05 | 0.000785 | 2.50778  |
| FBXO17    | 1.424492 | -0.87373 | 5.359057 | 3.10E-05 | 0.000787 | 2.500851 |
| CCR10     | 1.804936 | -0.53885 | 5.358387 | 3.10E-05 | 0.000787 | 2.49939  |
| LOC100422 | -1.28566 | 0.266158 | -5.35795 | 3.10E-05 | 0.000787 | 2.49843  |
| CPLX2     | 1.195941 | -0.67206 | 5.357895 | 3.10E-05 | 0.000787 | 2.498317 |
| MR1       | -1.48177 | 0.848362 | -5.35788 | 3.10E-05 | 0.000787 | 2.498283 |
| INHBE     | 1.546303 | -0.98985 | 5.357317 | 3.11E-05 | 0.000787 | 2.497056 |
| HAGH      | 2.186219 | -1.19818 | 5.356083 | 3.12E-05 | 0.000787 | 2.494365 |
| CHAC1     | 1.114089 | -0.60581 | 5.355628 | 3.12E-05 | 0.000787 | 2.493374 |
| PGF       | 2.797264 | -1.14312 | 5.355574 | 3.12E-05 | 0.000787 | 2.493255 |
| STAT5B    | -1.55584 | 0.94785  | -5.35469 | 3.13E-05 | 0.000787 | 2.491329 |
| FDPSL2A   | -1.03697 | 0.609145 | -5.35408 | 3.13E-05 | 0.000787 | 2.490007 |
| GYG1      | -2.82066 | 1.704359 | -5.35392 | 3.13E-05 | 0.000787 | 2.489657 |
| FIS1      | 1.683079 | -1.08538 | 5.352907 | 3.14E-05 | 0.000788 | 2.487437 |
| OAT       | -1.56478 | 0.440207 | -5.3506  | 3.16E-05 | 0.000791 | 2.482395 |
| TAF8      | -1.24351 | 0.661624 | -5.34797 | 3.17E-05 | 0.000793 | 2.476663 |
| ADPRHL1   | -1.12681 | 0.992196 | -5.34776 | 3.18E-05 | 0.000793 | 2.476208 |
| TMEM200I  | 1.210983 | -0.29915 | 5.347441 | 3.18E-05 | 0.000793 | 2.47551  |
| PCGF5     | 2.37674  | -0.87341 | 5.347295 | 3.18E-05 | 0.000793 | 2.475192 |
| SAMSN1    | -3.19592 | 1.47473  | -5.3437  | 3.21E-05 | 0.000796 | 2.46734  |
| ATG3      | -1.37756 | 0.660405 | -5.34299 | 3.21E-05 | 0.000796 | 2.4658   |
| IRX4      | 1.893975 | -0.86126 | 5.34201  | 3.22E-05 | 0.000796 | 2.463657 |
| OR5T2     | 1.346963 | -0.94386 | 5.341256 | 3.22E-05 | 0.000796 | 2.462012 |
| OR10R2    | -1.37759 | 0.424169 | -5.34119 | 3.22E-05 | 0.000796 | 2.461871 |
| FAM104A   | 0.989328 | -0.65545 | 5.341092 | 3.22E-05 | 0.000796 | 2.461653 |
| DNAJA2    | -1.11183 | 0.414094 | -5.34085 | 3.23E-05 | 0.000796 | 2.461127 |
| MREG      | -2.37214 | 0.691101 | -5.34067 | 3.23E-05 | 0.000796 | 2.46074  |
| VTA1      | -1.41779 | 0.643581 | -5.3402  | 3.23E-05 | 0.000796 | 2.459703 |
| EPHX3     | 1.879196 | -0.91756 | 5.339569 | 3.24E-05 | 0.000796 | 2.45833  |
| PPP1R35   | -1.09481 | 0.592124 | -5.33905 | 3.24E-05 | 0.000796 | 2.457191 |
| LRRC25    | -1.2956  | 0.890948 | -5.33864 | 3.24E-05 | 0.000796 | 2.456297 |

|           |          |          |          |          |          |          |
|-----------|----------|----------|----------|----------|----------|----------|
| SLC6A17   | 2.7165   | -1.48328 | 5.395543 | 3.39E-05 | 0.000808 | 2.452628 |
| CT47B1    | 1.280161 | -0.61897 | 5.400744 | 3.35E-05 | 0.000806 | 2.451097 |
| SH3BP2    | -1.2291  | 0.874678 | -5.33564 | 3.26E-05 | 0.000801 | 2.449751 |
| GUK1      | 2.46398  | -1.30112 | 5.334846 | 3.27E-05 | 0.000801 | 2.448019 |
| CRLF3     | -1.24839 | 0.727033 | -5.33352 | 3.28E-05 | 0.000801 | 2.445115 |
| CHCHD3    | -0.86587 | 0.714027 | -5.33272 | 3.29E-05 | 0.000801 | 2.443383 |
| PRR21     | 1.779918 | -0.82617 | 5.332564 | 3.29E-05 | 0.000801 | 2.443036 |
| LYZL1     | 1.413564 | -0.70083 | 5.332524 | 3.29E-05 | 0.000801 | 2.442948 |
| OXER1     | 1.825353 | -0.85235 | 5.332221 | 3.29E-05 | 0.000801 | 2.442287 |
| MSL3      | -1.71948 | 1.11485  | -5.33014 | 3.31E-05 | 0.000802 | 2.437738 |
| SZT2      | -0.71314 | 0.63547  | -5.33005 | 3.31E-05 | 0.000802 | 2.437543 |
| OR2H1     | 1.243162 | -0.701   | 5.329885 | 3.31E-05 | 0.000802 | 2.437185 |
| TXNL4A    | -0.79001 | 0.471209 | -5.32726 | 3.33E-05 | 0.000805 | 2.431458 |
| MAGOH     | -1.00928 | 0.582147 | -5.32703 | 3.33E-05 | 0.000805 | 2.430951 |
| CABP2     | 1.784781 | -0.58796 | 5.383742 | 3.48E-05 | 0.000811 | 2.427837 |
| DHDH      | 1.065257 | -0.37831 | 5.325017 | 3.34E-05 | 0.000806 | 2.426553 |
| AMN       | 1.767256 | -0.79496 | 5.324925 | 3.34E-05 | 0.000806 | 2.426352 |
| NT5M      | 1.941656 | -0.82262 | 5.324273 | 3.35E-05 | 0.000806 | 2.424927 |
| GABRB3    | 0.723683 | -0.73064 | 5.323602 | 3.35E-05 | 0.000806 | 2.423462 |
| LOC44046  | 1.193591 | -0.85415 | 5.32273  | 3.36E-05 | 0.000807 | 2.421556 |
| ARPC4     | -1.37141 | 1.105741 | -5.32126 | 3.37E-05 | 0.000808 | 2.418341 |
| FAM181A   | 2.439998 | -1.1059  | 5.319788 | 3.38E-05 | 0.000808 | 2.415131 |
| PPP6R3    | -2.04164 | 1.240317 | -5.3178  | 3.40E-05 | 0.000808 | 2.410779 |
| POC1A     | -1.11099 | 0.903126 | -5.31754 | 3.40E-05 | 0.000808 | 2.410218 |
| ACBD5     | -1.15684 | 0.436649 | -5.31749 | 3.40E-05 | 0.000808 | 2.410108 |
| ZNF818P   | -1.2139  | 0.388429 | -5.31732 | 3.40E-05 | 0.000808 | 2.409726 |
| ORAOV1    | -0.81203 | 0.543648 | -5.31697 | 3.41E-05 | 0.000808 | 2.40897  |
| BFAR      | -0.9092  | 0.603817 | -5.31563 | 3.42E-05 | 0.000808 | 2.406037 |
| SLC25A39  | 3.369551 | -1.47424 | 5.315389 | 3.42E-05 | 0.000808 | 2.405518 |
| PLCXD2    | 1.720207 | -0.85566 | 5.315196 | 3.42E-05 | 0.000808 | 2.405095 |
| IGDCC4    | 2.175538 | -0.95005 | 5.315193 | 3.42E-05 | 0.000808 | 2.405089 |
| HMX2      | 1.958167 | -0.90957 | 5.314759 | 3.42E-05 | 0.000808 | 2.404141 |
| LAMC3     | 2.354355 | -0.98442 | 5.314716 | 3.42E-05 | 0.000808 | 2.404048 |
| KIAA0485  | 1.271064 | -0.85556 | 5.314275 | 3.43E-05 | 0.000808 | 2.403083 |
| ACOT8     | -0.71485 | 0.493845 | -5.31312 | 3.43E-05 | 0.000808 | 2.40055  |
| LOC100130 | 2.411624 | -1.0387  | 5.312968 | 3.44E-05 | 0.000808 | 2.400228 |
| KCNK7     | 2.773838 | -1.10271 | 5.312209 | 3.44E-05 | 0.000808 | 2.398568 |
| LOC100501 | 1.144792 | -0.75581 | 5.312022 | 3.44E-05 | 0.000808 | 2.39816  |
| SLC22A18A | 1.650634 | -0.73064 | 5.311523 | 3.45E-05 | 0.000808 | 2.39707  |
| MILR1     | -2.45134 | 1.650955 | -5.31066 | 3.45E-05 | 0.000809 | 2.395187 |
| PLK1      | -1.55007 | 1.260112 | -5.30996 | 3.46E-05 | 0.000809 | 2.393663 |
| TMEM145   | 2.070891 | -0.965   | 5.308997 | 3.47E-05 | 0.00081  | 2.391548 |
| RNF7      | -0.9727  | 0.380706 | -5.30724 | 3.48E-05 | 0.000811 | 2.387715 |
| FOXB1     | 1.754687 | -0.76033 | 5.306669 | 3.49E-05 | 0.000811 | 2.386457 |
| SLC35C2   | -1.09841 | 0.815286 | -5.30581 | 3.49E-05 | 0.000811 | 2.384572 |
| BNIP2     | -1.94081 | 0.587518 | -5.3689  | 3.60E-05 | 0.00082  | 2.383866 |
| ATP11B    | -1.5386  | 0.400181 | -5.3054  | 3.50E-05 | 0.000811 | 2.383677 |

|           |          |          |          |          |          |          |
|-----------|----------|----------|----------|----------|----------|----------|
| SLC22A17  | 1.71631  | -0.78261 | 5.305344 | 3.50E-05 | 0.000811 | 2.383562 |
| FAM90A1   | -1.71271 | 0.74594  | -5.30479 | 3.50E-05 | 0.000811 | 2.382346 |
| HOXB13    | 1.357791 | -0.82683 | 5.303264 | 3.51E-05 | 0.000813 | 2.379015 |
| IMPG2     | 2.051801 | -0.91771 | 5.301356 | 3.53E-05 | 0.000815 | 2.374842 |
| UBA3      | -1.92219 | 0.823506 | -5.30036 | 3.54E-05 | 0.000816 | 2.37266  |
| IFT172    | 0.955126 | -0.5218  | 5.299312 | 3.54E-05 | 0.000817 | 2.370371 |
| CABP5     | 1.802962 | -0.89948 | 5.298698 | 3.55E-05 | 0.000817 | 2.369029 |
| FBXO15    | 2.190089 | -1.04962 | 5.297864 | 3.56E-05 | 0.000818 | 2.367207 |
| BIN3      | -0.86609 | 0.68324  | -5.2972  | 3.56E-05 | 0.000818 | 2.365743 |
| CDC42SE1  | -1.06536 | 0.768864 | -5.29621 | 3.57E-05 | 0.000818 | 2.363591 |
| SLC16A11  | 1.587785 | -0.80044 | 5.296127 | 3.57E-05 | 0.000818 | 2.363407 |
| LOH12CR1  | -1.12868 | 0.644058 | -5.29552 | 3.57E-05 | 0.000818 | 2.362086 |
| ACOT12    | 2.590376 | -1.32581 | 5.424366 | 3.84E-05 | 0.00085  | 2.361255 |
| SERINC3   | -1.41346 | 1.112856 | -5.29363 | 3.59E-05 | 0.00082  | 2.357937 |
| IL4R      | -1.33205 | 0.8322   | -5.29292 | 3.60E-05 | 0.00082  | 2.356387 |
| MYADML2   | 0.831207 | -0.39612 | 5.292298 | 3.60E-05 | 0.00082  | 2.355031 |
| PRDX6     | 1.834935 | -1.10983 | 5.290894 | 3.61E-05 | 0.000822 | 2.351959 |
| FCER1A    | 3.571684 | -2.45391 | 5.344727 | 3.79E-05 | 0.000848 | 2.345764 |
| SMU1      | -0.82374 | 0.639123 | -5.28447 | 3.66E-05 | 0.000833 | 2.337915 |
| KCNH4     | 1.317518 | -0.95452 | 5.282418 | 3.68E-05 | 0.000836 | 2.333415 |
| GLTP      | -1.48097 | 0.901745 | -5.28207 | 3.69E-05 | 0.000836 | 2.332644 |
| SLC6A5    | 2.431415 | -1.36476 | 5.281251 | 3.69E-05 | 0.000836 | 2.33086  |
| POLR2J    | -1.16535 | 0.999855 | -5.27938 | 3.71E-05 | 0.000839 | 2.32676  |
| LOC100507 | -0.70846 | 0.259997 | -5.27884 | 3.71E-05 | 0.000839 | 2.325576 |
| PSMD10    | -1.02317 | 0.196501 | -5.27784 | 3.72E-05 | 0.00084  | 2.323396 |
| DRD4      | 2.183269 | -0.80297 | 5.276845 | 3.73E-05 | 0.000841 | 2.321216 |
| DPP9      | -1.21834 | 1.271133 | -5.27633 | 3.73E-05 | 0.000841 | 2.320086 |
| EXOSC3    | -0.98604 | 0.584191 | -5.27451 | 3.75E-05 | 0.000843 | 2.316104 |
| C8orf44   | -1.18717 | 0.80241  | -5.27266 | 3.76E-05 | 0.000846 | 2.312054 |
| BBS2      | 1.081113 | -0.61302 | 5.271881 | 3.77E-05 | 0.000846 | 2.310348 |
| LONP2     | -1.10058 | 0.705927 | -5.27166 | 3.77E-05 | 0.000846 | 2.309869 |
| THYN1     | -0.81717 | 0.55177  | -5.27127 | 3.78E-05 | 0.000846 | 2.309001 |
| FAM55A    | 2.043176 | -0.56649 | 5.326496 | 3.95E-05 | 0.000864 | 2.307357 |
| C17orf85  | -1.16155 | 0.418316 | -5.26878 | 3.80E-05 | 0.000848 | 2.303561 |
| LRP10     | -1.50772 | 1.353997 | -5.26684 | 3.81E-05 | 0.00085  | 2.299301 |
| MGC45922  | 1.699562 | -0.90869 | 5.266777 | 3.81E-05 | 0.00085  | 2.299174 |
| SLC25A40  | -1.83341 | 0.678535 | -5.26633 | 3.82E-05 | 0.00085  | 2.298201 |
| HCCS      | -1.236   | 0.832195 | -5.26611 | 3.82E-05 | 0.00085  | 2.297723 |
| HBA1      | 4.524012 | -2.13981 | 5.32104  | 3.99E-05 | 0.000869 | 2.295856 |
| SOX17     | 1.656166 | -0.76637 | 5.264487 | 3.83E-05 | 0.00085  | 2.294157 |
| SCGBL     | 2.21364  | -1.12384 | 5.264463 | 3.83E-05 | 0.00085  | 2.294105 |
| IRX3      | 2.599306 | -1.05386 | 5.263841 | 3.84E-05 | 0.00085  | 2.292742 |
| HOXA3     | 1.052442 | -0.57849 | 5.263727 | 3.84E-05 | 0.00085  | 2.292493 |
| GMDS      | -0.78749 | 0.709939 | -5.26284 | 3.85E-05 | 0.00085  | 2.29055  |
| DNAJC5G   | 2.197444 | -0.86062 | 5.259831 | 3.88E-05 | 0.000855 | 2.283961 |
| CRHR1     | 1.553932 | -0.80103 | 5.258085 | 3.89E-05 | 0.000856 | 2.280135 |
| VNN1      | -4.36863 | 2.32596  | -5.25795 | 3.89E-05 | 0.000856 | 2.279837 |

|           |          |          |          |          |          |          |
|-----------|----------|----------|----------|----------|----------|----------|
| ANKRD22   | -3.69601 | 1.671522 | -5.25746 | 3.90E-05 | 0.000856 | 2.278774 |
| POLR2A    | 0.96872  | -0.69382 | 5.257189 | 3.90E-05 | 0.000856 | 2.278171 |
| CLPS      | 2.082113 | -0.93321 | 5.254908 | 3.92E-05 | 0.00086  | 2.273173 |
| FIBP      | -0.82557 | 0.440209 | -5.25409 | 3.93E-05 | 0.000861 | 2.271379 |
| EFHD1     | 1.520951 | -0.79185 | 5.385472 | 4.17E-05 | 0.000892 | 2.271072 |
| C19orf59  | -2.39015 | 1.477784 | -5.25149 | 3.95E-05 | 0.000864 | 2.265692 |
| ADRA2B    | 0.747155 | -0.45578 | 5.462017 | 4.34E-05 | 0.0009   | 2.264495 |
| C3orf71   | -1.36217 | 0.743574 | -5.24971 | 3.97E-05 | 0.000865 | 2.261783 |
| GOLGA1    | -1.3049  | 0.447548 | -5.2497  | 3.97E-05 | 0.000865 | 2.261767 |
| FAM47A    | 1.393118 | -0.69808 | 5.247492 | 3.99E-05 | 0.000869 | 2.256923 |
| LECT1     | 1.41448  | -0.92239 | 5.244666 | 4.01E-05 | 0.000872 | 2.250729 |
| LGR6      | 2.513402 | -1.08961 | 5.243871 | 4.02E-05 | 0.000873 | 2.248985 |
| SCNN1B    | 1.208438 | -0.99452 | 5.241452 | 4.04E-05 | 0.000876 | 2.243683 |
| IL1R1     | -2.18181 | 0.972785 | -5.24142 | 4.04E-05 | 0.000876 | 2.243616 |
| FSIP1     | 1.722815 | -0.55137 | 5.293365 | 4.24E-05 | 0.000897 | 2.237469 |
| PDPK1     | -1.29845 | 1.165304 | -5.23802 | 4.07E-05 | 0.000882 | 2.236152 |
| ZNF426    | -1.18206 | 0.715022 | -5.2959  | 4.22E-05 | 0.000895 | 2.229298 |
| RARB      | 1.096267 | -0.30999 | 5.232263 | 4.13E-05 | 0.000892 | 2.223534 |
| CCL24     | 1.151154 | -0.63747 | 5.231288 | 4.13E-05 | 0.000892 | 2.221397 |
| PPP1R7    | -0.64341 | 0.546363 | -5.23116 | 4.14E-05 | 0.000892 | 2.221126 |
| CDK5      | -0.87068 | 0.515394 | -5.23112 | 4.14E-05 | 0.000892 | 2.221038 |
| B3GALNT1  | 1.851766 | -0.85068 | 5.230549 | 4.14E-05 | 0.000892 | 2.219776 |
| GSTP1     | 1.427132 | -0.63397 | 5.229786 | 4.15E-05 | 0.000892 | 2.218103 |
| IGF2      | 2.237519 | -1.01386 | 5.228733 | 4.16E-05 | 0.000892 | 2.215793 |
| KLHL12    | -1.15549 | 0.575827 | -5.22837 | 4.16E-05 | 0.000892 | 2.214993 |
| LCE1C     | 1.06802  | -0.59317 | 5.227791 | 4.17E-05 | 0.000892 | 2.213725 |
| PLOD3     | 0.811628 | -0.32283 | 5.227624 | 4.17E-05 | 0.000892 | 2.21336  |
| MEF2D     | 1.373932 | -0.64938 | 5.225778 | 4.19E-05 | 0.000895 | 2.209311 |
| HRC       | 1.56428  | -0.69894 | 5.224278 | 4.20E-05 | 0.000895 | 2.206019 |
| GSTO1     | -1.30968 | 0.512714 | -5.22414 | 4.20E-05 | 0.000895 | 2.205708 |
| ITLN1     | 2.915242 | -1.41046 | 5.223283 | 4.21E-05 | 0.000895 | 2.203838 |
| TNFRSF14  | -0.61403 | 0.39075  | -5.22306 | 4.21E-05 | 0.000895 | 2.203346 |
| BCLAF1    | -0.93057 | 0.77276  | -5.2229  | 4.21E-05 | 0.000895 | 2.202998 |
| LINC00346 | 1.732342 | -0.75151 | 5.222599 | 4.22E-05 | 0.000895 | 2.202336 |
| C1D       | -1.32682 | 0.4463   | -5.22116 | 4.23E-05 | 0.000896 | 2.199171 |
| LOXL1     | -1.83914 | 1.187285 | -5.22102 | 4.23E-05 | 0.000896 | 2.198879 |
| SNRPA1    | -1.23536 | 0.825192 | -5.21843 | 4.26E-05 | 0.000899 | 2.193183 |
| SHISA6    | 2.298354 | -1.39844 | 5.34051  | 4.58E-05 | 0.000925 | 2.190866 |
| PRRT1     | 1.456348 | -0.80003 | 5.216563 | 4.28E-05 | 0.000899 | 2.189091 |
| FGFRL1    | -2.1185  | 1.919781 | -5.21623 | 4.28E-05 | 0.000899 | 2.188356 |
| WFDC12    | 1.599724 | -1.05721 | 5.216224 | 4.28E-05 | 0.000899 | 2.188347 |
| ZNF330    | -1.10795 | 0.422146 | -5.21537 | 4.29E-05 | 0.000899 | 2.186479 |
| GPR25     | 1.215328 | -0.55719 | 5.215212 | 4.29E-05 | 0.000899 | 2.186126 |
| SBK1      | 1.937759 | -0.87166 | 5.214807 | 4.29E-05 | 0.000899 | 2.185237 |
| TOR1A     | -1.04937 | 0.494961 | -5.21428 | 4.30E-05 | 0.000899 | 2.184091 |
| ANXA10    | 1.50971  | -0.78227 | 5.214195 | 4.30E-05 | 0.000899 | 2.183895 |
| ZBTB48    | -0.91531 | 0.81299  | -5.21393 | 4.30E-05 | 0.000899 | 2.183307 |



|           |          |          |          |          |          |          |
|-----------|----------|----------|----------|----------|----------|----------|
| NRBP1     | -0.68848 | 0.572407 | -5.21317 | 4.31E-05 | 0.0009   | 2.181643 |
| SLC34A1   | 2.437762 | -0.99198 | 5.212184 | 4.32E-05 | 0.0009   | 2.17948  |
| KRTAP2-1  | 2.567107 | -1.23186 | 5.211728 | 4.32E-05 | 0.0009   | 2.17848  |
| LOC100509 | 2.291664 | -0.99139 | 5.211476 | 4.32E-05 | 0.0009   | 2.177926 |
| SERPINB1  | -2.11214 | 0.718957 | -5.21105 | 4.33E-05 | 0.0009   | 2.177001 |
| TPTE2     | 1.01579  | -0.29571 | 5.210925 | 4.33E-05 | 0.0009   | 2.176718 |
| PID1      | 2.090211 | -1.22227 | 5.20908  | 4.35E-05 | 0.000901 | 2.172666 |
| TACR1     | 2.779719 | -0.94555 | 5.208912 | 4.35E-05 | 0.000901 | 2.172299 |
| FRMPD3    | 1.221972 | -0.58    | 5.207207 | 4.37E-05 | 0.000904 | 2.168555 |
| CRHR2     | 1.341299 | -0.74802 | 5.206394 | 4.38E-05 | 0.000904 | 2.166771 |
| C6orf27   | 1.286178 | -0.72227 | 5.205509 | 4.38E-05 | 0.000905 | 2.164829 |
| LINC00029 | 1.30264  | -0.62984 | 5.205346 | 4.39E-05 | 0.000905 | 2.16447  |
| OR1L3     | 2.312257 | -1.00293 | 5.203403 | 4.40E-05 | 0.000908 | 2.160203 |
| HTR1B     | 1.832673 | -0.9852  | 5.202492 | 4.41E-05 | 0.000908 | 2.158203 |
| LAMTOR2   | -0.83375 | 0.474096 | -5.20169 | 4.42E-05 | 0.000909 | 2.156445 |
| FLOT2     | -2.32159 | 1.700421 | -5.20051 | 4.43E-05 | 0.00091  | 2.153842 |
| SPRR2E    | 1.32466  | -0.83703 | 5.200214 | 4.44E-05 | 0.00091  | 2.153202 |
| TMEM239   | 2.618233 | -1.13569 | 5.199634 | 4.44E-05 | 0.000911 | 2.151928 |
| ARPC5L    | -0.97094 | 0.554931 | -5.19851 | 4.45E-05 | 0.000912 | 2.149456 |
| C22orf45  | 2.694351 | -1.13253 | 5.198142 | 4.46E-05 | 0.000912 | 2.148651 |
| ZNF546    | -1.24946 | 0.566293 | -5.19773 | 4.46E-05 | 0.000912 | 2.147752 |
| ZNF438    | -1.72325 | 1.235612 | -5.19672 | 4.47E-05 | 0.000913 | 2.145519 |
| SFT2D2    | -1.53685 | 0.448923 | -5.19483 | 4.49E-05 | 0.000916 | 2.141372 |
| FAM180A   | 2.675125 | -1.28623 | 5.191832 | 4.52E-05 | 0.00092  | 2.134791 |
| C6orf208  | 1.77166  | -1.15065 | 5.191781 | 4.52E-05 | 0.00092  | 2.134678 |
| LYPLA1    | -1.50734 | 0.837524 | -5.1906  | 4.54E-05 | 0.000922 | 2.132074 |
| CAV1      | 1.850355 | -0.81549 | 5.189644 | 4.54E-05 | 0.000923 | 2.129985 |
| CT47A11   | 1.751125 | -0.82377 | 5.1884   | 4.56E-05 | 0.000924 | 2.12725  |
| C5orf4    | 3.034639 | -1.45731 | 5.18715  | 4.57E-05 | 0.000925 | 2.124504 |
| ZBTB22    | -1.01345 | 0.474618 | -5.18619 | 4.58E-05 | 0.000925 | 2.122406 |
| UBL4A     | 0.913798 | -0.64783 | 5.186024 | 4.58E-05 | 0.000925 | 2.122031 |
| CPNE3     | -1.16435 | 0.639281 | -5.18566 | 4.59E-05 | 0.000925 | 2.121221 |
| SNX13     | -1.49141 | 0.455102 | -5.18538 | 4.59E-05 | 0.000925 | 2.120624 |
| C14orf93  | -0.62183 | 0.434508 | -5.18511 | 4.59E-05 | 0.000925 | 2.120033 |
| NPBWR1    | 2.668702 | -1.06562 | 5.184535 | 4.60E-05 | 0.000925 | 2.11876  |
| ACO1      | 0.952713 | -0.48104 | 5.18364  | 4.61E-05 | 0.000926 | 2.116793 |
| PSMA7     | -0.85031 | 0.602454 | -5.18308 | 4.61E-05 | 0.000926 | 2.115565 |
| OR7E5P    | -1.24483 | 0.448641 | -5.18198 | 4.62E-05 | 0.000927 | 2.113138 |
| PRIC285   | 1.108387 | -0.40092 | 5.181795 | 4.63E-05 | 0.000927 | 2.112738 |
| JARID2    | 1.348912 | -0.79098 | 5.181471 | 4.63E-05 | 0.000927 | 2.112026 |
| GPR77     | 0.96227  | -0.56324 | 5.180498 | 4.64E-05 | 0.000928 | 2.109888 |
| UBE2H     | -1.42363 | 0.764215 | -5.17848 | 4.66E-05 | 0.000931 | 2.105449 |
| SERPINB8  | -1.27377 | 0.878323 | -5.17772 | 4.67E-05 | 0.000932 | 2.103785 |
| GPR156    | 2.080164 | -0.90881 | 5.176009 | 4.69E-05 | 0.000934 | 2.10002  |
| TMEM214   | 1.329676 | -0.474   | 5.17517  | 4.70E-05 | 0.000935 | 2.098175 |
| VWA5B2    | 2.396504 | -0.89516 | 5.173759 | 4.71E-05 | 0.000937 | 2.095074 |
| RBMS2     | 0.881102 | -0.47079 | 5.173171 | 4.72E-05 | 0.000938 | 2.093783 |

|           |          |          |          |          |          |          |
|-----------|----------|----------|----------|----------|----------|----------|
| LOC92659  | 2.063808 | -0.97651 | 5.171825 | 4.73E-05 | 0.00094  | 2.090824 |
| MNT       | -0.75941 | 0.518616 | -5.17108 | 4.74E-05 | 0.00094  | 2.089187 |
| OR1L4     | 1.797652 | -1.22523 | 5.170026 | 4.75E-05 | 0.000942 | 2.086867 |
| KCNK3     | 1.780713 | -0.82027 | 5.169161 | 4.76E-05 | 0.000942 | 2.084965 |
| ENSA      | -1.16851 | 0.895927 | -5.16908 | 4.76E-05 | 0.000942 | 2.084789 |
| OPTN      | 2.072728 | -0.97785 | 5.167737 | 4.78E-05 | 0.000944 | 2.081835 |
| ROPN1L    | -2.05836 | 1.445356 | -5.16696 | 4.79E-05 | 0.000944 | 2.080121 |
| TMED7-TIC | -1.42334 | 0.743808 | -5.16651 | 4.79E-05 | 0.000944 | 2.079137 |
| SRA1      | -1.02983 | 0.696301 | -5.16589 | 4.80E-05 | 0.000945 | 2.077762 |
| TRAPPC1   | -0.8334  | 0.69328  | -5.1634  | 4.82E-05 | 0.000948 | 2.072287 |
| ID1       | -1.91215 | 1.245046 | -5.16231 | 4.84E-05 | 0.000948 | 2.06989  |
| LIN7B     | 1.892134 | -0.84085 | 5.162264 | 4.84E-05 | 0.000948 | 2.0698   |
| CCDC169   | 1.806786 | -0.77147 | 5.162254 | 4.84E-05 | 0.000948 | 2.069777 |
| C10orf27  | 2.280561 | -0.88878 | 5.161353 | 4.85E-05 | 0.000948 | 2.067794 |
| TGFBR3    | 1.434311 | -0.37894 | 5.16128  | 4.85E-05 | 0.000948 | 2.067635 |
| ARFGAP2   | -0.97819 | 0.779081 | -5.16088 | 4.85E-05 | 0.000948 | 2.066754 |
| IFT43     | -0.89999 | 0.614432 | -5.16055 | 4.86E-05 | 0.000948 | 2.066026 |
| HCAR2     | 1.860501 | -0.8795  | 5.160306 | 4.86E-05 | 0.000948 | 2.065492 |
| RPS6KB2   | -0.87694 | 0.638078 | -5.15946 | 4.87E-05 | 0.000949 | 2.063638 |
| SAP30BP   | -0.60551 | 0.484518 | -5.15819 | 4.88E-05 | 0.000951 | 2.060848 |
| CLEC10A   | 1.341485 | -0.54284 | 5.157773 | 4.89E-05 | 0.000951 | 2.05992  |
| HLF       | 1.187671 | -0.52067 | 5.274485 | 5.27E-05 | 0.000984 | 2.05613  |
| CYBB      | -1.56146 | 0.882096 | -5.15474 | 4.92E-05 | 0.000956 | 2.053246 |
| C19orf23  | 2.014077 | -0.88107 | 5.153581 | 4.93E-05 | 0.000957 | 2.050699 |
| KCNJ10    | 1.250431 | -1.0109  | 5.152835 | 4.94E-05 | 0.000957 | 2.049056 |
| LOC100506 | 1.452845 | -0.77883 | 5.152377 | 4.95E-05 | 0.000957 | 2.048049 |
| PYY2      | 2.171551 | -0.90407 | 5.152247 | 4.95E-05 | 0.000957 | 2.047764 |
| DAGLB     | -1.15405 | 0.897382 | -5.15196 | 4.95E-05 | 0.000957 | 2.047127 |
| FLJ43390  | -1.15486 | 0.297016 | -5.21007 | 5.10E-05 | 0.000965 | 2.046895 |
| NUCB1     | -1.64326 | 1.397106 | -5.15162 | 4.96E-05 | 0.000957 | 2.046375 |
| ORAI2     | -1.51924 | 1.115367 | -5.15103 | 4.96E-05 | 0.000957 | 2.045093 |
| NPBWR2    | 2.414092 | -0.98166 | 5.150884 | 4.96E-05 | 0.000957 | 2.044764 |
| LOC100133 | 1.235085 | -0.9501  | 5.150795 | 4.96E-05 | 0.000957 | 2.044569 |
| PKP3      | 1.243561 | -0.65897 | 5.149923 | 4.97E-05 | 0.000958 | 2.042651 |
| PRY2      | 2.004485 | -0.89181 | 5.148656 | 4.99E-05 | 0.000959 | 2.039862 |
| FAM131C   | 2.602589 | -1.14582 | 5.148228 | 4.99E-05 | 0.000959 | 2.038921 |
| LYRM1     | -1.73199 | 0.78285  | -5.1472  | 5.01E-05 | 0.000961 | 2.036651 |
| C10orf26  | -0.90234 | 0.702191 | -5.14622 | 5.02E-05 | 0.000962 | 2.034508 |
| LEPREL2   | 1.609457 | -0.95692 | 5.263195 | 5.40E-05 | 0.000997 | 2.033042 |
| PCBP4     | 1.318489 | -0.68237 | 5.144992 | 5.03E-05 | 0.000964 | 2.031799 |
| GSR       | -1.66678 | 0.744199 | -5.14419 | 5.04E-05 | 0.000964 | 2.030024 |
| MYEOV     | 1.993958 | -1.032   | 5.14356  | 5.05E-05 | 0.000964 | 2.028647 |
| COG4      | -0.8164  | 0.657246 | -5.14356 | 5.05E-05 | 0.000964 | 2.028644 |
| MAFA      | 2.149606 | -0.88481 | 5.143099 | 5.05E-05 | 0.000964 | 2.027633 |
| TMEM125   | 1.806057 | -1.29184 | 5.140982 | 5.08E-05 | 0.000965 | 2.022972 |
| CDK15     | 2.09941  | -1.2883  | 5.140907 | 5.08E-05 | 0.000965 | 2.022807 |
| LHX1      | 1.29073  | -0.65991 | 5.140584 | 5.08E-05 | 0.000965 | 2.022096 |

|           |          |          |          |          |          |          |
|-----------|----------|----------|----------|----------|----------|----------|
| DMRT3     | -1.37831 | 0.280915 | -5.14043 | 5.08E-05 | 0.000965 | 2.021762 |
| P2RX2     | 2.009003 | -0.94543 | 5.139861 | 5.09E-05 | 0.000965 | 2.020506 |
| UGT2A1    | 1.531607 | -0.79899 | 5.13962  | 5.09E-05 | 0.000965 | 2.019974 |
| KIAA0556  | -1.8221  | 1.277523 | -5.13953 | 5.09E-05 | 0.000965 | 2.019778 |
| RAB1B     | -1.38239 | 1.244407 | -5.13838 | 5.11E-05 | 0.000966 | 2.01725  |
| NKX6-1    | 1.308058 | -0.52822 | 5.195289 | 5.26E-05 | 0.000984 | 2.015395 |
| CDC26     | -1.01945 | 0.812684 | -5.13551 | 5.14E-05 | 0.00097  | 2.010933 |
| LOC146336 | 2.884867 | -1.67016 | 5.135118 | 5.15E-05 | 0.00097  | 2.010064 |
| EFNA3     | 1.528734 | -0.82433 | 5.135043 | 5.15E-05 | 0.00097  | 2.009899 |
| ATP5F1    | -1.17641 | 0.5589   | -5.13353 | 5.16E-05 | 0.000973 | 2.006559 |
| CCDC115   | -1.22359 | 0.948063 | -5.13296 | 5.17E-05 | 0.000973 | 2.005319 |
| UBE2NL    | -0.93823 | 0.560242 | -5.12963 | 5.21E-05 | 0.00098  | 1.997975 |
| TMED4     | -0.82152 | 0.850961 | -5.12822 | 5.23E-05 | 0.000982 | 1.994883 |
| GMPR2     | -1.67268 | 0.993534 | -5.12687 | 5.24E-05 | 0.000983 | 1.991894 |
| GADD45B   | -1.49734 | 1.111686 | -5.12673 | 5.24E-05 | 0.000983 | 1.991584 |
| FLJ39534  | -0.90389 | 0.51442  | -5.12542 | 5.26E-05 | 0.000984 | 1.988709 |
| KLK9      | 1.528435 | -0.71587 | 5.125059 | 5.26E-05 | 0.000984 | 1.987914 |
| ADAM2     | 0.988665 | -0.24521 | 5.124891 | 5.27E-05 | 0.000984 | 1.987542 |
| PRRT2     | 1.10949  | -0.59519 | 5.122785 | 5.29E-05 | 0.000987 | 1.982903 |
| CBFB      | -0.82501 | 0.65194  | -5.12169 | 5.31E-05 | 0.000988 | 1.980489 |
| RND2      | 1.328433 | -0.69449 | 5.235872 | 5.72E-05 | 0.001021 | 1.977103 |
| PAK6      | 0.776683 | -0.24393 | 5.118413 | 5.34E-05 | 0.000994 | 1.973274 |
| KIFC1     | -1.96094 | 1.582142 | -5.11801 | 5.35E-05 | 0.000994 | 1.972386 |
| FAM63B    | -1.53033 | 0.845295 | -5.11789 | 5.35E-05 | 0.000994 | 1.972128 |
| CDKN2A    | 1.208001 | -0.42439 | 5.116891 | 5.36E-05 | 0.000995 | 1.96992  |
| CYP3A43   | 1.526986 | -0.79327 | 5.11665  | 5.37E-05 | 0.000995 | 1.969389 |
| MGC24105  | 1.61449  | -1.06435 | 5.173305 | 5.53E-05 | 0.001    | 1.968518 |
| ADAD1     | 1.630926 | -0.95222 | 5.115663 | 5.38E-05 | 0.000996 | 1.967213 |
| GLE1      | -0.88477 | 0.762947 | -5.11466 | 5.39E-05 | 0.000997 | 1.965004 |
| OSM       | -1.88457 | 1.123419 | -5.11413 | 5.40E-05 | 0.000997 | 1.963831 |
| ZNF253    | -0.90929 | 0.36528  | -5.11373 | 5.40E-05 | 0.000997 | 1.962945 |
| SLC26A8   | -2.38069 | 2.089373 | -5.17061 | 5.56E-05 | 0.001003 | 1.962777 |
| C3orf23   | -1.27647 | 0.202721 | -5.11303 | 5.41E-05 | 0.000997 | 1.961417 |
| WSCD1     | -1.85258 | 0.455337 | -5.1622  | 5.66E-05 | 0.001014 | 1.959658 |
| BAP1      | -1.07449 | 0.882908 | -5.11211 | 5.42E-05 | 0.000997 | 1.959388 |
| P2RX3     | 1.580942 | -0.77576 | 5.111966 | 5.42E-05 | 0.000997 | 1.959068 |
| HBZ       | 3.737302 | -2.07372 | 5.111153 | 5.43E-05 | 0.000997 | 1.957275 |
| C4orf10   | -0.80079 | 0.584434 | -5.11043 | 5.44E-05 | 0.000997 | 1.955677 |
| LOC100507 | -0.94623 | 0.615869 | -5.11036 | 5.44E-05 | 0.000997 | 1.955528 |
| TPTE2P6   | 1.420456 | -0.73592 | 5.110072 | 5.45E-05 | 0.000997 | 1.954894 |
| TBC1D7    | -1.09668 | 0.575204 | -5.10981 | 5.45E-05 | 0.000997 | 1.954319 |
| MMD2      | -0.90145 | 0.17366  | -5.10895 | 5.46E-05 | 0.000997 | 1.952421 |
| OR1S2     | 1.312349 | -0.64341 | 5.108892 | 5.46E-05 | 0.000997 | 1.952294 |
| PPM1B     | -1.12531 | 0.331081 | -5.10841 | 5.47E-05 | 0.000997 | 1.951229 |
| PDZD11    | 1.099012 | -0.58913 | 5.108003 | 5.47E-05 | 0.000997 | 1.950334 |
| DISP2     | 1.300317 | -0.64734 | 5.107961 | 5.47E-05 | 0.000997 | 1.950242 |
| GRPR      | 1.870031 | -0.8899  | 5.107939 | 5.47E-05 | 0.000997 | 1.950193 |

|           |          |          |          |          |          |          |
|-----------|----------|----------|----------|----------|----------|----------|
| GAPDH     | -0.98353 | 0.708823 | -5.10764 | 5.48E-05 | 0.000997 | 1.949542 |
| SNX3      | -1.71558 | 0.856809 | -5.10715 | 5.48E-05 | 0.000997 | 1.948463 |
| PROP1     | 1.92222  | -0.84425 | 5.106037 | 5.50E-05 | 0.000998 | 1.946001 |
| HTATIP2   | -1.45815 | 0.90588  | -5.1058  | 5.50E-05 | 0.000998 | 1.945485 |
| TNP2      | 2.410271 | -0.93431 | 5.104325 | 5.52E-05 | 0.001    | 1.942227 |
| WFDC9     | 1.760911 | -0.908   | 5.103735 | 5.53E-05 | 0.001    | 1.940926 |
| C1orf212  | -1.2685  | 0.535009 | -5.10301 | 5.54E-05 | 0.001    | 1.939329 |
| FLJ32255  | -1.49308 | 1.196088 | -5.10301 | 5.54E-05 | 0.001    | 1.939329 |
| BNIP3L    | 2.069417 | -1.23088 | 5.098012 | 5.60E-05 | 0.001009 | 1.928311 |
| DYRK1B    | 1.41204  | -0.58895 | 5.096177 | 5.62E-05 | 0.001013 | 1.924264 |
| EDEM2     | -1.46792 | 0.900739 | -5.09505 | 5.64E-05 | 0.001014 | 1.921782 |
| FBN1      | 2.234423 | -1.47119 | 5.094231 | 5.65E-05 | 0.001014 | 1.919974 |
| MAS1      | 1.91039  | -0.64003 | 5.094177 | 5.65E-05 | 0.001014 | 1.919855 |
| NLRP9     | -0.66015 | 0.377395 | -5.09413 | 5.65E-05 | 0.001014 | 1.919757 |
| BIRC5     | -1.94979 | 1.263905 | -5.09288 | 5.67E-05 | 0.001014 | 1.917001 |
| CHMP4A    | -0.65748 | 0.588153 | -5.09287 | 5.67E-05 | 0.001014 | 1.916969 |
| RNF167    | -1.39264 | 1.147657 | -5.09234 | 5.67E-05 | 0.001014 | 1.915801 |
| ROR2      | 1.518076 | -1.012   | 5.090755 | 5.69E-05 | 0.001017 | 1.912308 |
| MBD4      | -1.11015 | 0.676805 | -5.08784 | 5.73E-05 | 0.001021 | 1.905876 |
| CDHR5     | 1.710546 | -0.69421 | 5.087737 | 5.73E-05 | 0.001021 | 1.905652 |
| LOC284998 | 1.660096 | -0.94786 | 5.266437 | 6.46E-05 | 0.001086 | 1.902034 |
| GABRB2    | 1.644591 | -0.82756 | 5.085791 | 5.76E-05 | 0.001024 | 1.901361 |
| TBX21     | 1.872354 | -0.69217 | 5.085501 | 5.76E-05 | 0.001024 | 1.900721 |
| PHKA2     | -1.13286 | 0.689609 | -5.08385 | 5.78E-05 | 0.001027 | 1.89707  |
| VGLL2     | 0.941229 | -0.56253 | 5.083739 | 5.78E-05 | 0.001027 | 1.896834 |
| FGF8      | 0.877871 | -0.2688  | 5.196705 | 6.22E-05 | 0.001066 | 1.896773 |
| C2orf56   | -1.2536  | 0.428725 | -5.0829  | 5.80E-05 | 0.001028 | 1.894991 |
| DIRC1     | 1.760158 | -0.80836 | 5.082383 | 5.80E-05 | 0.001028 | 1.893842 |
| GSPT1     | 2.245479 | -1.06146 | 5.081379 | 5.82E-05 | 0.001029 | 1.891628 |
| ENO2      | 1.433107 | -0.862   | 5.080098 | 5.83E-05 | 0.001032 | 1.888802 |
| PDGFC     | -1.61048 | 0.5309   | -5.07898 | 5.85E-05 | 0.001033 | 1.88634  |
| C17orf96  | 1.483728 | -0.84738 | 5.075631 | 5.89E-05 | 0.00104  | 1.878945 |
| STAMBP    | -0.80049 | 0.466688 | -5.07508 | 5.90E-05 | 0.00104  | 1.877719 |
| NEUROG1   | 1.604611 | -0.76367 | 5.074846 | 5.90E-05 | 0.00104  | 1.877213 |
| ESPN      | 1.845175 | -0.65251 | 5.074587 | 5.91E-05 | 0.00104  | 1.876642 |
| TPSG1     | 1.194447 | -0.74589 | 5.074218 | 5.91E-05 | 0.00104  | 1.875827 |
| LOC100129 | 1.50354  | -0.78142 | 5.073203 | 5.93E-05 | 0.001041 | 1.873586 |
| ARHGAP33  | -1.1838  | 0.935918 | -5.07275 | 5.93E-05 | 0.001041 | 1.872579 |
| GSC       | 1.549912 | -0.82545 | 5.072625 | 5.93E-05 | 0.001041 | 1.872312 |
| NUMA1     | -1.1952  | 1.142973 | -5.07092 | 5.96E-05 | 0.001044 | 1.868556 |
| CACNA1E   | 1.837019 | -0.85845 | 5.06961  | 5.97E-05 | 0.001046 | 1.865657 |
| OR2A7     | -1.24238 | 0.485349 | -5.12481 | 6.15E-05 | 0.00106  | 1.864947 |
| POLR1D    | -1.60051 | 1.233494 | -5.06919 | 5.98E-05 | 0.001046 | 1.864725 |
| SLAMF9    | 1.837695 | -0.79571 | 5.068471 | 5.99E-05 | 0.001047 | 1.863145 |
| C1orf198  | 1.866005 | -0.70541 | 5.067569 | 6.00E-05 | 0.001047 | 1.861153 |
| OTUB2     | 1.778946 | -1.09778 | 5.067213 | 6.01E-05 | 0.001047 | 1.860368 |
| GPR12     | 1.810797 | -0.85697 | 5.067115 | 6.01E-05 | 0.001047 | 1.860151 |

|            |          |          |          |          |          |          |
|------------|----------|----------|----------|----------|----------|----------|
| KLHL17     | 2.525115 | -0.87158 | 5.066985 | 6.01E-05 | 0.001047 | 1.859863 |
| CYP4X1     | -1.54757 | 0.3198   | -5.06408 | 6.05E-05 | 0.001053 | 1.853452 |
| KCNQ1OT1   | -1.41854 | 0.893833 | -5.06375 | 6.06E-05 | 0.001053 | 1.852724 |
| TMPRSS11   | -1.4745  | 0.312372 | -5.11069 | 6.35E-05 | 0.001079 | 1.850091 |
| C7orf42    | -1.16267 | 0.689678 | -5.0625  | 6.07E-05 | 0.001054 | 1.849972 |
| C3orf38    | -1.12217 | 0.291281 | -5.06215 | 6.08E-05 | 0.001054 | 1.849192 |
| CHMP1B     | -1.11196 | 0.55561  | -5.0621  | 6.08E-05 | 0.001054 | 1.849083 |
| MTRR       | -1.51522 | 0.489283 | -5.06005 | 6.11E-05 | 0.001058 | 1.844558 |
| PPP2CA     | -1.03007 | 0.460219 | -5.05965 | 6.11E-05 | 0.001058 | 1.843665 |
| HSPA13     | 0.980363 | -0.2207  | 5.169603 | 6.59E-05 | 0.001089 | 1.841089 |
| C7orf28B   | -1.0838  | 0.32675  | -5.05823 | 6.13E-05 | 0.00106  | 1.840536 |
| FLOT1      | -2.35621 | 1.62297  | -5.05817 | 6.13E-05 | 0.00106  | 1.840403 |
| BEST4      | 1.283572 | -0.66129 | 5.057386 | 6.14E-05 | 0.00106  | 1.838673 |
| MRGPRF     | 1.88015  | -0.9175  | 5.057044 | 6.15E-05 | 0.00106  | 1.837918 |
| SLU7       | -1.37155 | 0.880684 | -5.05627 | 6.16E-05 | 0.001061 | 1.8362   |
| ZNF189     | -1.16198 | 0.466573 | -5.05424 | 6.19E-05 | 0.001064 | 1.831731 |
| BPIFB2     | 2.864934 | -1.1986  | 5.053394 | 6.20E-05 | 0.001064 | 1.829858 |
| GPR97      | -1.86424 | 1.35291  | -5.05337 | 6.20E-05 | 0.001064 | 1.829807 |
| GDF5       | 1.953655 | -0.8392  | 5.053121 | 6.20E-05 | 0.001064 | 1.829254 |
| VPS29      | -1.07578 | 0.699616 | -5.05177 | 6.22E-05 | 0.001066 | 1.826273 |
| NFKBIZ     | -2.18936 | 1.190803 | -5.05152 | 6.23E-05 | 0.001066 | 1.82572  |
| MKRN1      | 1.950177 | -1.17427 | 5.050943 | 6.23E-05 | 0.001066 | 1.824444 |
| CRYGA      | 1.428832 | -0.63079 | 5.04976  | 6.25E-05 | 0.001068 | 1.821831 |
| DYRK1A     | 1.81262  | -0.75183 | 5.047    | 6.29E-05 | 0.001074 | 1.815735 |
| ATP11A     | -1.46238 | 0.681504 | -5.04489 | 6.32E-05 | 0.001077 | 1.811076 |
| SNX14      | -1.45192 | 0.378356 | -5.04437 | 6.33E-05 | 0.001077 | 1.809936 |
| HSD17B14   | 1.739774 | -0.63498 | 5.044235 | 6.33E-05 | 0.001077 | 1.809628 |
| MESP1      | 1.05827  | -0.31566 | 5.043984 | 6.33E-05 | 0.001077 | 1.809073 |
| C10orf46   | -1.47244 | 0.809809 | -5.04271 | 6.35E-05 | 0.001079 | 1.806264 |
| IGF2BP3    | -1.84125 | 0.597194 | -5.03923 | 6.40E-05 | 0.001085 | 1.79858  |
| CCDC108    | 1.200822 | -0.62551 | 5.039146 | 6.41E-05 | 0.001085 | 1.798385 |
| AKIRIN2-A' | -0.96531 | 0.829698 | -5.09296 | 6.60E-05 | 0.001089 | 1.796818 |
| PDE1B      | -1.29323 | 0.929932 | -5.0384  | 6.42E-05 | 0.001085 | 1.796731 |
| FUT2       | 1.304602 | -1.13732 | 5.038223 | 6.42E-05 | 0.001085 | 1.796346 |
| MUSK       | 1.465107 | -0.70239 | 5.03788  | 6.42E-05 | 0.001085 | 1.795587 |
| C20orf151  | 0.983919 | -0.60865 | 5.03746  | 6.43E-05 | 0.001085 | 1.79466  |
| TMEM165    | -2.07216 | 0.67217  | -5.03695 | 6.44E-05 | 0.001085 | 1.793524 |
| FUZ        | 0.713088 | -0.18205 | 5.036818 | 6.44E-05 | 0.001085 | 1.79324  |
| GAL3ST3    | 1.726858 | -0.99358 | 5.036151 | 6.45E-05 | 0.001085 | 1.791766 |
| FCGR2A     | -1.85081 | 1.263098 | -5.03611 | 6.45E-05 | 0.001085 | 1.791687 |
| EPN3       | 1.480458 | -0.7795  | 5.036    | 6.45E-05 | 0.001085 | 1.791434 |
| MED12      | -1.85211 | 1.461971 | -5.03448 | 6.47E-05 | 0.001087 | 1.788067 |
| LOC344591  | 1.361799 | -0.75473 | 5.033534 | 6.49E-05 | 0.001088 | 1.785983 |
| CHD1       | -1.60124 | 0.648012 | -5.03346 | 6.49E-05 | 0.001088 | 1.785813 |
| ECM2       | 1.262743 | -0.3072  | 5.031918 | 6.51E-05 | 0.001089 | 1.782412 |
| LINC00491  | 2.818032 | -1.01444 | 5.030964 | 6.53E-05 | 0.001089 | 1.780305 |
| TOP3B      | -0.8217  | 0.606684 | -5.02935 | 6.55E-05 | 0.001089 | 1.776729 |

|           |          |          |          |          |          |          |
|-----------|----------|----------|----------|----------|----------|----------|
| VPS8      | -1.32019 | 0.61748  | -5.0291  | 6.55E-05 | 0.001089 | 1.77618  |
| NASP      | -1.67561 | 1.308783 | -5.02896 | 6.56E-05 | 0.001089 | 1.775865 |
| ECSIT     | 1.315319 | -0.67531 | 5.027937 | 6.57E-05 | 0.001089 | 1.773614 |
| PSG11     | 1.174419 | -0.43783 | 5.027799 | 6.57E-05 | 0.001089 | 1.77331  |
| PSG2      | 1.633634 | -0.76597 | 5.027317 | 6.58E-05 | 0.001089 | 1.772244 |
| CMTM4     | -1.88636 | 0.725297 | -5.02728 | 6.58E-05 | 0.001089 | 1.772162 |
| PRLH      | 1.36235  | -0.62687 | 5.027214 | 6.58E-05 | 0.001089 | 1.772016 |
| DAB2IP    | 1.242803 | -0.47231 | 5.027171 | 6.58E-05 | 0.001089 | 1.77192  |
| FDFT1     | -0.57337 | 0.415101 | -5.02708 | 6.58E-05 | 0.001089 | 1.771724 |
| ALOX5     | -1.74361 | 1.006939 | -5.02662 | 6.59E-05 | 0.001089 | 1.770701 |
| HES4      | 1.616511 | -0.68679 | 5.026385 | 6.60E-05 | 0.001089 | 1.770183 |
| LRRC15    | -1.30496 | 0.297159 | -5.02612 | 6.60E-05 | 0.001089 | 1.769598 |
| MYH13     | 1.220916 | -0.61663 | 5.025823 | 6.60E-05 | 0.001089 | 1.768942 |
| ATP2A1    | -1.35249 | 1.009522 | -5.02578 | 6.60E-05 | 0.001089 | 1.768846 |
| SPAST     | -1.3538  | 0.475267 | -5.07982 | 6.80E-05 | 0.001107 | 1.768673 |
| IL5RA     | 1.88542  | -1.23146 | 5.071548 | 6.92E-05 | 0.001113 | 1.766665 |
| NKX2-3    | 1.5993   | -0.86379 | 5.023292 | 6.64E-05 | 0.001095 | 1.763345 |
| FCF1      | -0.57386 | 0.125219 | -5.02145 | 6.67E-05 | 0.001098 | 1.759276 |
| PGM2      | -1.62502 | 0.612609 | -5.02125 | 6.67E-05 | 0.001098 | 1.758836 |
| AHR       | 1.221502 | -0.90748 | 5.02099  | 6.68E-05 | 0.001098 | 1.758257 |
| SLC25A47  | 1.639873 | -0.81218 | 5.020355 | 6.69E-05 | 0.001098 | 1.756853 |
| PPIH      | 1.601848 | -0.83818 | 5.019935 | 6.69E-05 | 0.001098 | 1.755925 |
| UTP18     | -0.85446 | 0.168474 | -5.01974 | 6.70E-05 | 0.001098 | 1.755497 |
| PLBD2     | 1.139139 | -0.58095 | 5.017131 | 6.74E-05 | 0.001104 | 1.749725 |
| LOC646715 | -0.91665 | 0.307997 | -5.01657 | 6.74E-05 | 0.001104 | 1.748476 |
| CDK5RAP2  | -2.13527 | 1.43662  | -5.01639 | 6.75E-05 | 0.001104 | 1.748089 |
| KCNN2     | 1.558177 | -0.62978 | 5.015378 | 6.76E-05 | 0.001105 | 1.745848 |
| TAF12     | -1.03038 | 0.730983 | -5.01525 | 6.77E-05 | 0.001105 | 1.745565 |
| RUNDC1    | -1.19414 | 0.877257 | -5.01468 | 6.77E-05 | 0.001105 | 1.744305 |
| GDI2      | -0.99188 | 0.555527 | -5.01336 | 6.79E-05 | 0.001107 | 1.741385 |
| HP07349   | 1.520478 | -0.64857 | 5.012357 | 6.81E-05 | 0.001108 | 1.739167 |
| PLEKHG4B  | 1.442742 | -0.71965 | 5.011821 | 6.82E-05 | 0.001108 | 1.737981 |
| CD177     | -1.66799 | 1.40591  | -5.01163 | 6.82E-05 | 0.001108 | 1.737561 |
| SYCE1L    | 1.183561 | -0.66205 | 5.011376 | 6.83E-05 | 0.001108 | 1.736997 |
| MRPS2     | 1.108363 | -0.46632 | 5.010498 | 6.84E-05 | 0.001109 | 1.735057 |
| CETN2     | -1.08808 | 0.939317 | -5.01024 | 6.84E-05 | 0.001109 | 1.734486 |
| PIP4K2A   | 1.745255 | -0.75099 | 5.009578 | 6.85E-05 | 0.00111  | 1.733021 |
| SECTM1    | -1.68722 | 1.498173 | -5.00882 | 6.87E-05 | 0.00111  | 1.731336 |
| HEY2      | 1.533327 | -0.93344 | 5.108714 | 7.51E-05 | 0.00117  | 1.731259 |
| KRT19     | 0.608505 | -0.53485 | 5.008646 | 6.87E-05 | 0.00111  | 1.730961 |
| LOC100128 | 1.183782 | -0.88268 | 5.008543 | 6.87E-05 | 0.00111  | 1.730732 |
| POLR2B    | -0.82342 | 0.23007  | -5.00796 | 6.88E-05 | 0.00111  | 1.729438 |
| LOC100133 | -1.26864 | 0.854167 | -5.00708 | 6.89E-05 | 0.001112 | 1.727493 |
| EMR1      | -1.74749 | 0.597899 | -5.00653 | 6.90E-05 | 0.001112 | 1.726277 |
| MCTP2     | -2.45897 | 1.655336 | -5.0052  | 6.92E-05 | 0.001113 | 1.723339 |
| TSC22D4   | -1.03066 | 1.068092 | -5.0035  | 6.95E-05 | 0.001113 | 1.719585 |
| TBCA      | -1.16473 | 0.446927 | -5.0034  | 6.95E-05 | 0.001113 | 1.719354 |

|           |          |          |          |          |          |          |
|-----------|----------|----------|----------|----------|----------|----------|
| MADD      | 1.015756 | -0.56745 | 5.003361 | 6.95E-05 | 0.001113 | 1.71927  |
| TMEM52    | 1.883485 | -0.82905 | 5.003246 | 6.95E-05 | 0.001113 | 1.719016 |
| HMBS      | 2.130971 | -1.01526 | 5.00321  | 6.95E-05 | 0.001113 | 1.718936 |
| FOXEO     | 1.609512 | -0.72057 | 5.00305  | 6.96E-05 | 0.001113 | 1.718582 |
| GDF15     | 1.616748 | -0.9135  | 5.002896 | 6.96E-05 | 0.001113 | 1.718241 |
| ACOT9     | -1.37395 | 0.895419 | -5.0028  | 6.96E-05 | 0.001113 | 1.71802  |
| NKX2-8    | 1.517897 | -0.79587 | 5.001041 | 6.99E-05 | 0.001116 | 1.714138 |
| LOC100506 | -1.0441  | 0.551302 | -4.99713 | 7.05E-05 | 0.001125 | 1.705488 |
| DSPP      | 1.482355 | -0.51482 | 4.996526 | 7.06E-05 | 0.001126 | 1.704147 |
| ERP27     | -0.93888 | 0.432756 | -4.99503 | 7.09E-05 | 0.001129 | 1.70084  |
| BICD1     | -1.32084 | 0.25366  | -4.99371 | 7.11E-05 | 0.001131 | 1.697918 |
| R3HDML    | 2.449253 | -1.00706 | 4.993188 | 7.12E-05 | 0.001132 | 1.696762 |
| LTK       | 1.238775 | -0.21702 | 4.99194  | 7.14E-05 | 0.001134 | 1.693999 |
| REG3G     | 1.692879 | -0.58043 | 5.33525  | 8.59E-05 | 0.001263 | 1.693066 |
| IDI2-AS1  | -0.98656 | 0.556126 | -4.99077 | 7.16E-05 | 0.001136 | 1.691409 |
| C14orf133 | -0.64615 | 0.361976 | -4.98823 | 7.20E-05 | 0.001142 | 1.685779 |
| MPDU1     | -1.29089 | 0.952887 | -4.98732 | 7.21E-05 | 0.001143 | 1.683765 |
| ANO10     | -2.06465 | 1.087457 | -4.98637 | 7.23E-05 | 0.001145 | 1.681681 |
| BCAM      | 1.747676 | -0.85178 | 4.983885 | 7.27E-05 | 0.00115  | 1.676172 |
| MED27     | -0.88364 | 0.481557 | -4.98059 | 7.32E-05 | 0.001158 | 1.668879 |
| TEP1      | -0.94825 | 0.708513 | -4.98034 | 7.33E-05 | 0.001158 | 1.668322 |
| CLEC4D    | -2.96771 | 1.219726 | -4.97958 | 7.34E-05 | 0.001159 | 1.666649 |
| TAAR5     | 1.185029 | -0.82791 | 4.979022 | 7.35E-05 | 0.00116  | 1.665405 |
| NYX       | 1.819477 | -0.96081 | 4.977259 | 7.38E-05 | 0.001161 | 1.661502 |
| UCKL1     | 1.019586 | -0.37474 | 4.977066 | 7.38E-05 | 0.001161 | 1.661075 |
| CCDC7     | 1.069564 | -0.87955 | 4.976558 | 7.39E-05 | 0.001161 | 1.659949 |
| TECPR1    | -0.91113 | 0.538762 | -4.97643 | 7.39E-05 | 0.001161 | 1.659669 |
| APOE      | 1.303018 | -0.57038 | 4.976413 | 7.39E-05 | 0.001161 | 1.659628 |
| FECH      | 1.214313 | -0.6528  | 4.976155 | 7.40E-05 | 0.001161 | 1.659058 |
| SFTA3     | -1.28974 | 0.222629 | -4.97615 | 7.40E-05 | 0.001161 | 1.659038 |
| LOC100505 | 1.116287 | -0.64345 | 4.974027 | 7.44E-05 | 0.001165 | 1.654345 |
| PCYT1A    | -1.51106 | 0.636138 | -4.97345 | 7.44E-05 | 0.001166 | 1.65307  |
| ZNF862    | -0.75292 | 0.670179 | -4.97312 | 7.45E-05 | 0.001166 | 1.65233  |
| LOC100507 | -1.22217 | 0.257298 | -5.02531 | 7.67E-05 | 0.001183 | 1.651763 |
| ZNF776    | -1.04141 | 0.341921 | -4.97274 | 7.46E-05 | 0.001166 | 1.651485 |
| ERP44     | -1.32245 | 0.787311 | -4.97246 | 7.46E-05 | 0.001166 | 1.650875 |
| TSPAN1    | 0.859873 | -0.71001 | 4.971919 | 7.47E-05 | 0.001166 | 1.649676 |
| ALPL      | -2.11345 | 1.87699  | -4.97131 | 7.48E-05 | 0.001167 | 1.648323 |
| SLC22A10  | 2.507614 | -1.1366  | 4.970361 | 7.50E-05 | 0.001169 | 1.646226 |
| OR52B2    | 1.283212 | -0.83122 | 4.969029 | 7.52E-05 | 0.00117  | 1.643277 |
| FGGY      | -1.27965 | 0.757021 | -4.96774 | 7.54E-05 | 0.001173 | 1.640412 |
| SH3D21    | 1.622738 | -0.81193 | 4.966793 | 7.56E-05 | 0.001175 | 1.638324 |
| KLHDC8A   | 1.231528 | -0.1669  | 4.966307 | 7.57E-05 | 0.001175 | 1.637247 |
| C11orf42  | 1.204832 | -0.61863 | 4.965508 | 7.58E-05 | 0.001176 | 1.635478 |
| PRRG1     | 1.676028 | -0.78347 | 4.965254 | 7.59E-05 | 0.001176 | 1.634916 |
| UTF1      | 1.234675 | -0.61144 | 4.965059 | 7.59E-05 | 0.001176 | 1.634484 |
| GPR39     | 1.214475 | -0.40195 | 4.962525 | 7.63E-05 | 0.001181 | 1.628871 |

|           |          |          |          |          |          |          |
|-----------|----------|----------|----------|----------|----------|----------|
| C19orf44  | 1.107583 | -0.53422 | 4.962254 | 7.64E-05 | 0.001181 | 1.62827  |
| CSNK2A1   | -0.70547 | 0.514495 | -4.9621  | 7.64E-05 | 0.001181 | 1.627927 |
| RAB26     | 1.77637  | -0.80148 | 4.960782 | 7.66E-05 | 0.001183 | 1.625009 |
| OTUD6A    | 1.866492 | -0.88961 | 4.959769 | 7.68E-05 | 0.001184 | 1.622766 |
| C1orf74   | -1.10063 | 0.611446 | -4.95893 | 7.70E-05 | 0.001185 | 1.620899 |
| TTC9C     | -0.86434 | 0.677608 | -4.95867 | 7.70E-05 | 0.001185 | 1.620329 |
| FBXW2     | -1.43248 | 0.661251 | -4.95439 | 7.78E-05 | 0.001195 | 1.610857 |
| GJD2      | 2.217444 | -0.92529 | 4.954153 | 7.78E-05 | 0.001195 | 1.610323 |
| KIF17     | 1.072319 | -0.62531 | 4.953861 | 7.79E-05 | 0.001195 | 1.609675 |
| PCCA      | 0.916567 | -0.29506 | 4.953479 | 7.79E-05 | 0.001195 | 1.60883  |
| FLJ30679  | 2.949065 | -0.99864 | 4.953326 | 7.80E-05 | 0.001195 | 1.608491 |
| GPR45     | 1.311374 | -0.6261  | 4.952114 | 7.82E-05 | 0.001198 | 1.605804 |
| MAPK12    | 2.129833 | -1.02996 | 4.951492 | 7.83E-05 | 0.001198 | 1.604427 |
| C20orf54  | 2.198557 | -1.31288 | 4.95133  | 7.83E-05 | 0.001198 | 1.604067 |
| EOMES     | 1.530939 | -0.55669 | 5.113479 | 8.86E-05 | 0.00129  | 1.600829 |
| C5orf32   | -2.34828 | 1.198161 | -4.94892 | 7.88E-05 | 0.001204 | 1.598728 |
| MAP2K6    | -2.40033 | 1.198621 | -4.94679 | 7.91E-05 | 0.001209 | 1.594009 |
| NTN3      | 2.573683 | -1.06183 | 4.945778 | 7.93E-05 | 0.00121  | 1.591763 |
| ODF4      | 1.301622 | -1.0506  | 4.945706 | 7.93E-05 | 0.00121  | 1.591604 |
| EPS8L3    | 1.769011 | -0.89806 | 4.944791 | 7.95E-05 | 0.001211 | 1.589577 |
| THOC7     | -0.79232 | 0.278891 | -4.94379 | 7.97E-05 | 0.001212 | 1.587364 |
| ZNF548    | 1.5491   | -0.61672 | 4.943706 | 7.97E-05 | 0.001212 | 1.58717  |
| C9orf156  | -0.80618 | 0.44963  | -4.94252 | 7.99E-05 | 0.001212 | 1.584548 |
| GLS2      | 0.851268 | -0.51913 | 4.942419 | 7.99E-05 | 0.001212 | 1.584318 |
| BTBD2     | 1.633466 | -0.92928 | 4.942147 | 8.00E-05 | 0.001212 | 1.583714 |
| CSRP1     | -1.58167 | 1.517102 | -4.942   | 8.00E-05 | 0.001212 | 1.583398 |
| FURIN     | -1.44578 | 0.943966 | -4.94188 | 8.00E-05 | 0.001212 | 1.583123 |
| CDC7      | 1.323704 | -0.69874 | 4.941844 | 8.00E-05 | 0.001212 | 1.583042 |
| OR8J1     | 2.366178 | -0.88092 | 4.940463 | 8.03E-05 | 0.001215 | 1.579983 |
| YIPF4     | -1.33004 | 0.964292 | -4.93998 | 8.04E-05 | 0.001215 | 1.578921 |
| TRAK2     | 1.177761 | -0.7061  | 4.939208 | 8.05E-05 | 0.001217 | 1.5772   |
| C20orf108 | 2.546332 | -1.39747 | 4.938164 | 8.07E-05 | 0.001219 | 1.574886 |
| PRPF38A   | -0.9967  | 0.572313 | -4.93622 | 8.11E-05 | 0.001223 | 1.570582 |
| SEC13     | -0.82177 | 0.594288 | -4.93549 | 8.12E-05 | 0.001224 | 1.56896  |
| CSTL1     | 1.28711  | -0.84007 | 4.934753 | 8.14E-05 | 0.001225 | 1.567324 |
| RANBP6    | -1.22306 | 0.222874 | -4.93431 | 8.14E-05 | 0.001226 | 1.566337 |
| ZNF613    | -1.456   | 0.671265 | -4.9327  | 8.17E-05 | 0.001228 | 1.562771 |
| NR1H2     | -0.98325 | 0.957565 | -4.93265 | 8.18E-05 | 0.001228 | 1.562661 |
| ARHGAP22  | 1.808792 | -0.60228 | 4.932122 | 8.19E-05 | 0.001229 | 1.561491 |
| CLCN1     | 1.811929 | -0.76755 | 4.931339 | 8.20E-05 | 0.00123  | 1.559754 |
| HBA2      | 4.472202 | -2.0627  | 4.974392 | 8.59E-05 | 0.001263 | 1.558989 |
| METTL7A   | 1.155395 | -0.64032 | 4.93038  | 8.22E-05 | 0.001231 | 1.557627 |
| CXorf48   | 1.67819  | -0.66156 | 4.93024  | 8.22E-05 | 0.001231 | 1.557317 |
| DCAF5     | -0.89398 | 0.478868 | -4.92927 | 8.24E-05 | 0.001233 | 1.555175 |
| FLJ42875  | 1.296969 | -0.69642 | 4.92835  | 8.26E-05 | 0.001235 | 1.553124 |
| THEM5     | 1.306926 | -0.72348 | 4.928131 | 8.26E-05 | 0.001235 | 1.552641 |
| TSPAN10   | 1.450185 | -0.64563 | 4.926588 | 8.29E-05 | 0.001238 | 1.549219 |



|           |          |          |          |          |          |          |
|-----------|----------|----------|----------|----------|----------|----------|
| GNRH2     | 1.237903 | -0.78932 | 4.925619 | 8.31E-05 | 0.00124  | 1.547069 |
| KATNA1    | -0.77252 | 0.385441 | -4.92363 | 8.35E-05 | 0.001245 | 1.542652 |
| CDRT15    | 1.480711 | -0.5823  | 5.083242 | 9.43E-05 | 0.001333 | 1.54096  |
| RNF146    | -1.47352 | 0.847507 | -4.92192 | 8.38E-05 | 0.001249 | 1.538862 |
| C18orf12  | 1.476948 | -0.79475 | 4.921146 | 8.39E-05 | 0.001249 | 1.537148 |
| C9orf50   | 1.849766 | -0.80486 | 4.921029 | 8.40E-05 | 0.001249 | 1.536888 |
| HGF       | -2.37906 | 1.252608 | -4.91973 | 8.42E-05 | 0.001251 | 1.534012 |
| PDE4D     | -1.62768 | 0.343005 | -4.91955 | 8.42E-05 | 0.001251 | 1.533605 |
| HAR1A     | 1.115311 | -0.66545 | 4.919372 | 8.43E-05 | 0.001251 | 1.533214 |
| IGSF9     | 2.349904 | -0.86075 | 4.918854 | 8.44E-05 | 0.001252 | 1.532064 |
| CDC42EP4  | 1.391716 | -0.71568 | 4.916896 | 8.48E-05 | 0.001255 | 1.527721 |
| HBXIP     | -1.15349 | 0.449103 | -4.91682 | 8.48E-05 | 0.001255 | 1.527545 |
| NOTUM     | 0.928587 | -0.51446 | 4.916781 | 8.48E-05 | 0.001255 | 1.527465 |
| ZFPL1     | -0.87675 | 0.721789 | -4.91567 | 8.50E-05 | 0.001256 | 1.525    |
| EIF5B     | 1.407765 | -0.23615 | 4.915188 | 8.51E-05 | 0.001256 | 1.523933 |
| MFSD10    | -0.88172 | 0.87008  | -4.91483 | 8.52E-05 | 0.001256 | 1.523138 |
| CYP26A1   | 1.599866 | -0.57019 | 4.914653 | 8.52E-05 | 0.001256 | 1.522745 |
| PPP2R2B   | 1.343293 | -0.90631 | 4.914568 | 8.52E-05 | 0.001256 | 1.522556 |
| LOC100501 | 1.056182 | -0.85574 | 4.911795 | 8.58E-05 | 0.001263 | 1.516404 |
| ATP6V1G2  | 1.472057 | -0.8236  | 4.908597 | 8.64E-05 | 0.00127  | 1.509307 |
| PTPRU     | 1.513723 | -1.02461 | 4.906908 | 8.67E-05 | 0.001274 | 1.505561 |
| TRIP4     | -1.18183 | 0.878463 | -4.90591 | 8.69E-05 | 0.001275 | 1.503338 |
| MKL2      | -0.97928 | 0.307418 | -4.90541 | 8.70E-05 | 0.001275 | 1.502241 |
| AK1       | 1.726978 | -0.74727 | 4.905271 | 8.71E-05 | 0.001275 | 1.501927 |
| RAB11B    | -1.46583 | 1.495902 | -4.90495 | 8.71E-05 | 0.001275 | 1.501219 |
| RCHY1     | -1.28806 | 0.334086 | -4.90452 | 8.72E-05 | 0.001275 | 1.500257 |
| C7orf49   | -0.59745 | 0.476682 | -4.90427 | 8.73E-05 | 0.001275 | 1.499697 |
| PPP4C     | -0.78574 | 0.639064 | -4.90412 | 8.73E-05 | 0.001275 | 1.499364 |
| CTDP1     | -1.11479 | 0.878158 | -4.90344 | 8.74E-05 | 0.001276 | 1.497864 |
| EIF4H     | -0.98567 | 0.691051 | -4.90043 | 8.80E-05 | 0.001284 | 1.491186 |
| PODNL1    | 0.948278 | -0.70685 | 4.90006  | 8.81E-05 | 0.001284 | 1.490363 |
| IL18RAP   | -2.32481 | 1.379322 | -4.89731 | 8.87E-05 | 0.00129  | 1.484248 |
| PLB1      | -2.5971  | 1.776087 | -4.89727 | 8.87E-05 | 0.00129  | 1.484179 |
| LRRC4     | 1.231308 | -0.34289 | 4.939371 | 9.29E-05 | 0.001323 | 1.483928 |
| Mar-05    | -1.25084 | 0.602015 | -4.89573 | 8.90E-05 | 0.001293 | 1.480756 |
| SYNPO     | 1.266982 | -0.78632 | 4.895552 | 8.90E-05 | 0.001293 | 1.480357 |
| MMP27     | 1.320797 | -0.84587 | 4.9454   | 9.16E-05 | 0.001316 | 1.479935 |
| MEMO1     | -0.96866 | 0.46279  | -4.8948  | 8.92E-05 | 0.001293 | 1.47868  |
| IL10RB    | -1.70499 | 0.916004 | -4.89447 | 8.92E-05 | 0.001293 | 1.477952 |
| C5orf44   | -1.30732 | 0.295208 | -4.89434 | 8.93E-05 | 0.001293 | 1.477659 |
| SHC3      | 2.263063 | -1.05953 | 4.894251 | 8.93E-05 | 0.001293 | 1.477468 |
| C22orf24  | 1.316231 | -0.63989 | 4.893318 | 8.95E-05 | 0.001295 | 1.475398 |
| RBBP6     | -0.88689 | 0.785036 | -4.89275 | 8.96E-05 | 0.001296 | 1.47414  |
| NECAP2    | -0.90488 | 0.775981 | -4.89147 | 8.99E-05 | 0.001299 | 1.471289 |
| BMX       | -2.60001 | 1.566277 | -4.89096 | 9.00E-05 | 0.001299 | 1.470173 |
| FSCN2     | 1.401502 | -0.95448 | 4.890563 | 9.01E-05 | 0.001299 | 1.469281 |
| FBXO22    | -0.98162 | 0.508651 | -4.88886 | 9.04E-05 | 0.001303 | 1.465508 |

|           |          |          |          |          |          |          |
|-----------|----------|----------|----------|----------|----------|----------|
| UPP1      | -3.48356 | 2.405519 | -4.88824 | 9.05E-05 | 0.001304 | 1.464124 |
| TRIP10    | 0.872556 | -0.16433 | 4.887867 | 9.06E-05 | 0.001304 | 1.463296 |
| TTLL11    | -0.84565 | 0.579186 | -4.88558 | 9.11E-05 | 0.00131  | 1.458217 |
| AOC2      | 0.685035 | -0.29061 | 4.882955 | 9.16E-05 | 0.001316 | 1.452389 |
| KRT32     | 2.166366 | -0.91204 | 4.881651 | 9.19E-05 | 0.001319 | 1.449493 |
| CSNK1G3   | -1.06255 | 0.317017 | -4.88114 | 9.20E-05 | 0.00132  | 1.448366 |
| CYHR1     | -1.10977 | 1.115538 | -4.88022 | 9.22E-05 | 0.001321 | 1.446323 |
| SBF2      | -1.6483  | 1.275408 | -4.88003 | 9.23E-05 | 0.001321 | 1.445892 |
| C10orf114 | 1.755217 | -1.09077 | 4.87967  | 9.23E-05 | 0.001322 | 1.445093 |
| CLK3      | -1.23461 | 1.035573 | -4.87897 | 9.25E-05 | 0.001323 | 1.443542 |
| SGSM1     | 1.620371 | -0.7085  | 4.878589 | 9.26E-05 | 0.001323 | 1.442692 |
| LIMD2     | -1.17849 | 1.126945 | -4.87795 | 9.27E-05 | 0.001323 | 1.441284 |
| LINC00301 | -1.26381 | 0.280419 | -4.87758 | 9.28E-05 | 0.001323 | 1.440447 |
| CD4       | 1.717876 | -0.73641 | 4.877154 | 9.29E-05 | 0.001323 | 1.439506 |
| SOX21     | 1.743623 | -0.78578 | 4.876342 | 9.30E-05 | 0.001324 | 1.437703 |
| CCDC53    | -1.29456 | 0.823108 | -4.87598 | 9.31E-05 | 0.001324 | 1.436895 |
| OR10A4    | 2.650976 | -1.08816 | 4.875946 | 9.31E-05 | 0.001324 | 1.436823 |
| ADORA2A   | -1.4427  | 1.181078 | -4.87561 | 9.32E-05 | 0.001324 | 1.436072 |
| OR4C3     | 1.981743 | -0.89496 | 4.874823 | 9.34E-05 | 0.001326 | 1.434328 |
| SLC9A1    | -1.61536 | 1.50743  | -4.87342 | 9.37E-05 | 0.001329 | 1.431208 |
| KCNIP2    | 1.390509 | -0.53492 | 4.872718 | 9.38E-05 | 0.00133  | 1.429654 |
| SCN3B     | 2.3633   | -0.94032 | 4.871962 | 9.40E-05 | 0.001332 | 1.427973 |
| CYB5D2    | -0.77409 | 0.686746 | -4.87147 | 9.41E-05 | 0.001332 | 1.426878 |
| SPRR1A    | 1.040974 | -0.71001 | 4.870613 | 9.43E-05 | 0.001333 | 1.424976 |
| RABEP1    | -1.4274  | 0.909275 | -4.87044 | 9.43E-05 | 0.001333 | 1.424582 |
| TREML2    | -1.31383 | 0.915833 | -4.86881 | 9.47E-05 | 0.001336 | 1.420961 |
| LSM6      | -1.01777 | 0.249289 | -4.86779 | 9.49E-05 | 0.001339 | 1.418715 |
| BPIFB6    | 0.999234 | -0.30625 | 4.916733 | 9.77E-05 | 0.001359 | 1.418163 |
| INSIG2    | -1.66503 | 0.722836 | -4.86608 | 9.53E-05 | 0.001342 | 1.414912 |
| PIPOX     | 1.359405 | -0.65263 | 4.86593  | 9.53E-05 | 0.001342 | 1.414574 |
| DAB1      | 1.11803  | -0.69663 | 4.864746 | 9.56E-05 | 0.001345 | 1.411943 |
| CEBPB     | -1.41774 | 0.837775 | -4.86368 | 9.58E-05 | 0.001347 | 1.409565 |
| BRCC3     | -0.97577 | 0.524544 | -4.86283 | 9.60E-05 | 0.001349 | 1.407682 |
| STAG3L1   | 0.81906  | -0.71457 | 4.861683 | 9.62E-05 | 0.001351 | 1.405137 |
| CISH      | -1.57169 | 0.794036 | -4.86157 | 9.63E-05 | 0.001351 | 1.404896 |
| YME1L1    | -1.05331 | 0.639722 | -4.86129 | 9.63E-05 | 0.001351 | 1.404275 |
| BOK       | 1.387629 | -0.26577 | 4.859518 | 9.67E-05 | 0.001355 | 1.400327 |
| PIP5KL1   | 1.403991 | -0.75633 | 4.859392 | 9.67E-05 | 0.001355 | 1.400046 |
| CSPG4     | 1.080978 | -0.34606 | 4.85838  | 9.70E-05 | 0.001357 | 1.397797 |
| DUSP18    | -1.19883 | 0.967499 | -4.85744 | 9.72E-05 | 0.001359 | 1.395708 |
| CASP5     | -2.03482 | 1.376486 | -4.8561  | 9.75E-05 | 0.001359 | 1.392726 |
| ENHO      | 1.39371  | -0.64199 | 4.85576  | 9.76E-05 | 0.001359 | 1.391976 |
| EIF4E     | -1.00661 | 0.450805 | -4.85563 | 9.76E-05 | 0.001359 | 1.391687 |
| C19orf38  | -1.39296 | 0.740853 | -4.85547 | 9.76E-05 | 0.001359 | 1.391338 |
| MBNL3     | 1.541406 | -1.2261  | 4.855423 | 9.76E-05 | 0.001359 | 1.391227 |
| GDF7      | 1.072813 | -0.48397 | 4.855323 | 9.77E-05 | 0.001359 | 1.391003 |
| EGLN2     | -1.01056 | 0.802871 | -4.85491 | 9.77E-05 | 0.001359 | 1.39008  |

|           |          |          |          |          |          |          |
|-----------|----------|----------|----------|----------|----------|----------|
| LRRC23    | -1.0345  | 0.751846 | -4.85467 | 9.78E-05 | 0.001359 | 1.389549 |
| GRB7      | 1.160324 | -0.64887 | 4.853127 | 9.81E-05 | 0.001362 | 1.386122 |
| ALOX5AP   | -2.27736 | 1.59332  | -4.85294 | 9.82E-05 | 0.001362 | 1.385718 |
| GMNN      | -1.64818 | 0.946812 | -4.85271 | 9.82E-05 | 0.001362 | 1.385195 |
| TLE6      | 0.928727 | -0.71147 | 4.852059 | 9.84E-05 | 0.001363 | 1.38375  |
| PSMD11    | -0.54411 | 0.540859 | -4.84981 | 9.89E-05 | 0.001369 | 1.37876  |
| EIF2AK1   | -1.23046 | 0.711603 | -4.84963 | 9.89E-05 | 0.001369 | 1.378349 |
| AKR1C1    | -1.58299 | 0.430392 | -4.84813 | 9.93E-05 | 0.001373 | 1.375012 |
| UNC119    | -1.02657 | 0.863402 | -4.84616 | 9.97E-05 | 0.001377 | 1.370643 |
| CCNB1     | -1.73197 | 1.123152 | -4.84616 | 9.97E-05 | 0.001377 | 1.370636 |
| LOC10013: | 0.970771 | -0.6424  | 4.845038 | 1.00E-04 | 0.00138  | 1.368144 |
| KRTAP12-1 | 1.642667 | -0.98103 | 4.842718 | 0.000101 | 0.001386 | 1.362986 |
| C15orf38  | 1.814327 | -0.8901  | 4.841652 | 0.000101 | 0.001387 | 1.360617 |
| LOC38919: | 1.197251 | -0.6594  | 4.841522 | 0.000101 | 0.001387 | 1.360327 |
| ZNF205    | 1.310766 | -0.51888 | 4.841522 | 0.000101 | 0.001387 | 1.360326 |
| SBNO2     | -1.40525 | 1.204824 | -4.84099 | 0.000101 | 0.001388 | 1.359135 |
| FETUB     | 1.955104 | -0.85172 | 4.839377 | 0.000101 | 0.001391 | 1.355557 |
| TYW5      | -2.72806 | 1.126071 | -4.83935 | 0.000101 | 0.001391 | 1.355505 |
| NXF1      | -0.87615 | 0.560601 | -4.83898 | 0.000101 | 0.001391 | 1.35468  |
| GABPB1    | -0.92041 | 0.564648 | -4.83884 | 0.000101 | 0.001391 | 1.354373 |
| FRMD1     | 1.012266 | -0.57246 | 4.838424 | 0.000102 | 0.001391 | 1.35344  |
| DFNB31    | 1.344975 | -0.59384 | 4.836778 | 0.000102 | 0.001395 | 1.349779 |
| NIT1      | -1.02394 | 0.654007 | -4.83651 | 0.000102 | 0.001395 | 1.349184 |
| USP32P2   | 1.987246 | -0.69384 | 4.835531 | 0.000102 | 0.001397 | 1.347007 |
| C19orf42  | -0.74322 | 0.318231 | -4.83437 | 0.000102 | 0.001399 | 1.344417 |
| KLF7      | -1.55171 | 1.072202 | -4.83431 | 0.000102 | 0.001399 | 1.344284 |
| CHST10    | 1.644602 | -0.59787 | 4.833703 | 0.000103 | 0.0014   | 1.342942 |
| BRD8      | -0.6328  | 0.403875 | -4.83339 | 0.000103 | 0.0014   | 1.342241 |
| NTN4      | 1.014471 | -0.1345  | 4.880653 | 0.000106 | 0.001432 | 1.340325 |
| ARG1      | -3.94448 | 1.947555 | -4.83125 | 0.000103 | 0.001406 | 1.337492 |
| MYOZ3     | 1.338665 | -0.7641  | 4.830783 | 0.000103 | 0.001407 | 1.336448 |
| RNF166    | -1.27639 | 1.031242 | -4.82946 | 0.000104 | 0.00141  | 1.333514 |
| PON3      | 1.783562 | -0.83261 | 4.828203 | 0.000104 | 0.001413 | 1.33071  |
| NEAT1     | -1.85535 | 0.632733 | -4.82763 | 0.000104 | 0.001414 | 1.329434 |
| DNAH9     | 1.338287 | -1.07992 | 4.8755   | 0.000107 | 0.001443 | 1.329201 |
| ZNF418    | 1.400932 | -0.7908  | 4.824371 | 0.000105 | 0.001424 | 1.322188 |
| LTB4R     | -1.5616  | 0.970722 | -4.82369 | 0.000105 | 0.001424 | 1.320668 |
| TNNC1     | 1.524746 | -0.69652 | 4.823602 | 0.000105 | 0.001424 | 1.320477 |
| PSTPIP2   | -2.76518 | 1.934222 | -4.82356 | 0.000105 | 0.001424 | 1.320381 |
| ANKDD1A   | 0.970185 | -0.57066 | 4.823135 | 0.000105 | 0.001424 | 1.319438 |
| FERMT3    | -1.27732 | 1.063138 | -4.82197 | 0.000105 | 0.001427 | 1.316837 |
| LOC10013: | 1.707902 | -0.77019 | 4.817526 | 0.000107 | 0.00144  | 1.30696  |
| C10orf28  | -0.77947 | 0.535199 | -4.81715 | 0.000107 | 0.00144  | 1.30613  |
| CDK7      | -0.7435  | 0.168639 | -4.81681 | 0.000107 | 0.00144  | 1.305369 |
| MAPK14    | -2.62571 | 1.601049 | -4.81554 | 0.000107 | 0.001443 | 1.302552 |
| RHBDD2    | -1.19326 | 0.706158 | -4.81472 | 0.000107 | 0.001444 | 1.300716 |
| AMPD3     | -1.31884 | 0.488414 | -4.81448 | 0.000107 | 0.001444 | 1.300191 |

|           |          |          |          |          |          |          |
|-----------|----------|----------|----------|----------|----------|----------|
| RNF122    | 0.824871 | -0.2288  | 4.813893 | 0.000107 | 0.001445 | 1.298879 |
| LOC100506 | 1.198726 | -0.7923  | 4.813567 | 0.000108 | 0.001445 | 1.298153 |
| C15orf17  | -1.26    | 0.687366 | -4.81283 | 0.000108 | 0.001445 | 1.296506 |
| MTRNR2L6  | 1.184095 | -0.49833 | 4.812358 | 0.000108 | 0.001445 | 1.295462 |
| LALBA     | 3.087425 | -1.17503 | 4.812341 | 0.000108 | 0.001445 | 1.295425 |
| CD72      | -1.60558 | 1.443325 | -4.81208 | 0.000108 | 0.001445 | 1.294852 |
| MFF       | -0.84941 | 0.354053 | -4.81176 | 0.000108 | 0.001445 | 1.294123 |
| EIF4E3    | -1.92817 | 1.445567 | -4.81161 | 0.000108 | 0.001445 | 1.293804 |
| LOC100133 | -2.4861  | 1.428208 | -4.811   | 0.000108 | 0.001446 | 1.292437 |
| ZFR       | -1.19569 | 0.814156 | -4.80958 | 0.000108 | 0.001449 | 1.289289 |
| PMS2L2    | -0.97517 | 0.614774 | -4.80953 | 0.000109 | 0.001449 | 1.289167 |
| PRKCDBP   | 1.591763 | -0.70215 | 4.807737 | 0.000109 | 0.001451 | 1.28518  |
| LOC284446 | 2.674651 | -1.08783 | 4.807654 | 0.000109 | 0.001451 | 1.284996 |
| CA1       | 3.681533 | -1.79648 | 4.807575 | 0.000109 | 0.001451 | 1.28482  |
| SDF2      | -1.21987 | 1.001623 | -4.80749 | 0.000109 | 0.001451 | 1.284623 |
| CRLS1     | -1.02942 | 0.02618  | -4.80744 | 0.000109 | 0.001451 | 1.284518 |
| DPM2      | 1.876276 | -0.71332 | 4.806911 | 0.000109 | 0.001452 | 1.283342 |
| IRF2      | -1.73859 | 1.463515 | -4.80558 | 0.00011  | 0.001456 | 1.28039  |
| GPR32     | 1.42082  | -1.00116 | 4.80488  | 0.00011  | 0.001457 | 1.278822 |
| HNRNPCL1  | -1.8667  | 0.379245 | -4.80365 | 0.00011  | 0.00146  | 1.276081 |
| PSG7      | -0.74941 | 0.152173 | -4.80346 | 0.00011  | 0.00146  | 1.275653 |
| ARL8A     | -1.54555 | 1.185517 | -4.80219 | 0.00011  | 0.001463 | 1.272825 |
| ACY3      | 2.075838 | -0.76179 | 4.79966  | 0.000111 | 0.00147  | 1.267205 |
| BRD3      | -1.31343 | 1.151254 | -4.79937 | 0.000111 | 0.00147  | 1.266564 |
| TRIM21    | -1.25417 | 1.087747 | -4.79918 | 0.000111 | 0.00147  | 1.266128 |
| REEP1     | 2.113808 | -0.94315 | 4.799014 | 0.000111 | 0.00147  | 1.265766 |
| PPP1R3E   | -0.88018 | 0.799323 | -4.79874 | 0.000111 | 0.00147  | 1.265156 |
| ZNF138    | 1.335536 | -0.62668 | 4.891202 | 0.00012  | 0.001545 | 1.264732 |
| COG5      | -0.81443 | 0.302615 | -4.79827 | 0.000111 | 0.00147  | 1.264122 |
| PSG6      | -1.72931 | 0.495795 | -4.79814 | 0.000111 | 0.00147  | 1.263824 |
| GNPAT     | -0.74107 | 0.285729 | -4.79773 | 0.000112 | 0.00147  | 1.262899 |
| NLK       | -1.04411 | 0.597838 | -4.79595 | 0.000112 | 0.001475 | 1.258949 |
| RNF25     | -0.88053 | 0.713884 | -4.79563 | 0.000112 | 0.001475 | 1.258227 |
| GLTPD2    | 1.712958 | -0.76674 | 4.795243 | 0.000112 | 0.001475 | 1.257375 |
| WASH7P    | 0.957246 | -0.58208 | 4.794914 | 0.000112 | 0.001475 | 1.256641 |
| RTCD1     | -1.15605 | 0.528982 | -4.79473 | 0.000112 | 0.001475 | 1.25623  |
| ARHGAP4   | -0.71845 | 0.483313 | -4.79448 | 0.000112 | 0.001475 | 1.255671 |
| MSH3      | -1.29198 | 0.469695 | -4.79427 | 0.000112 | 0.001475 | 1.255205 |
| TMEM114   | 1.613009 | -0.76125 | 4.792768 | 0.000113 | 0.001479 | 1.251865 |
| LEPREL1   | 1.151534 | -0.55176 | 4.831381 | 0.000118 | 0.001529 | 1.251858 |
| BCKDK     | -1.20064 | 0.710588 | -4.7924  | 0.000113 | 0.001479 | 1.251054 |
| SAT1      | -1.33311 | 0.850386 | -4.79129 | 0.000113 | 0.001482 | 1.248573 |
| C2orf28   | -0.73105 | 0.434392 | -4.79021 | 0.000113 | 0.001485 | 1.24616  |
| NR5A1     | 1.33744  | -0.67833 | 4.789681 | 0.000114 | 0.001486 | 1.244991 |
| KIAA0430  | 0.951375 | -0.712   | 4.788379 | 0.000114 | 0.001489 | 1.242093 |
| TMEM131   | -0.96096 | 0.296203 | -4.78803 | 0.000114 | 0.001489 | 1.24132  |
| C9orf25   | 1.307237 | -0.71268 | 4.787567 | 0.000114 | 0.00149  | 1.240286 |

|           |          |          |          |          |          |          |
|-----------|----------|----------|----------|----------|----------|----------|
| PRB4      | 1.221878 | -0.68026 | 4.787416 | 0.000114 | 0.00149  | 1.23995  |
| GLT25D1   | -1.4447  | 0.797792 | -4.78645 | 0.000114 | 0.001492 | 1.237801 |
| MPP7      | -2.04081 | 1.047047 | -4.78599 | 0.000115 | 0.001492 | 1.236781 |
| MAOA      | 1.356877 | -0.7369  | 4.785502 | 0.000115 | 0.001493 | 1.235688 |
| ODF3L2    | 1.828435 | -0.6612  | 4.781514 | 0.000116 | 0.001506 | 1.226808 |
| PPAP2C    | 1.590929 | -0.75158 | 4.781355 | 0.000116 | 0.001506 | 1.226455 |
| CPB2      | -1.16357 | 0.179547 | -4.77958 | 0.000116 | 0.001511 | 1.222494 |
| CMAHP     | -2.3635  | 0.971258 | -4.77857 | 0.000117 | 0.001513 | 1.220243 |
| KCTD11    | 0.792844 | -0.37652 | 4.777488 | 0.000117 | 0.001516 | 1.217843 |
| GOS2      | -3.49923 | 1.796013 | -4.77601 | 0.000117 | 0.00152  | 1.21456  |
| GNAI2     | -1.16286 | 1.071021 | -4.77591 | 0.000117 | 0.00152  | 1.214318 |
| CNPY3     | -1.02519 | 0.850318 | -4.77451 | 0.000118 | 0.001523 | 1.2112   |
| OPRD1     | 1.171751 | -0.81038 | 4.774078 | 0.000118 | 0.001524 | 1.210248 |
| DHFRL1    | 1.588117 | -1.08505 | 4.771507 | 0.000118 | 0.00153  | 1.204522 |
| FZD1      | 1.490572 | -0.67831 | 4.771369 | 0.000118 | 0.00153  | 1.204216 |
| SH3BP5    | -1.8645  | 0.972569 | -4.77025 | 0.000119 | 0.001533 | 1.20173  |
| SPTA1     | 1.235584 | -0.26473 | 4.987551 | 0.000138 | 0.001667 | 1.196504 |
| COPS7A    | -1.14504 | 0.858541 | -4.76668 | 0.00012  | 0.001545 | 1.19376  |
| ASB16     | 1.30009  | -0.6914  | 4.766217 | 0.00012  | 0.001545 | 1.192739 |
| ORMDL3    | 1.944017 | -0.64242 | 4.765543 | 0.00012  | 0.001545 | 1.191237 |
| ATP6V1E1  | -1.20803 | 0.745242 | -4.76533 | 0.00012  | 0.001545 | 1.19076  |
| FAM108A1  | -0.70742 | 0.606348 | -4.76514 | 0.00012  | 0.001545 | 1.190333 |
| OSTalpha  | -3.46074 | 1.602193 | -4.76399 | 0.000121 | 0.001549 | 1.187785 |
| SH3GL2    | -0.55932 | 0.081236 | -4.76124 | 0.000121 | 0.001557 | 1.181645 |
| L2HGDH    | -1.03188 | 0.381278 | -4.76072 | 0.000121 | 0.001558 | 1.180494 |
| NOXO1     | 1.557398 | -0.64691 | 4.759765 | 0.000122 | 0.00156  | 1.178365 |
| DUOXA2    | 1.494042 | -0.66992 | 4.759714 | 0.000122 | 0.00156  | 1.178251 |
| STK3      | -1.61346 | 0.609226 | -4.75937 | 0.000122 | 0.00156  | 1.177489 |
| PTPN22    | -1.97735 | 0.939013 | -4.75914 | 0.000122 | 0.00156  | 1.176975 |
| MAP7D2    | 1.224706 | -0.58409 | 4.757077 | 0.000122 | 0.001566 | 1.172376 |
| SEMA3G    | 0.695744 | -0.36739 | 4.756913 | 0.000123 | 0.001566 | 1.172012 |
| PAX1      | 1.248949 | -0.58594 | 4.756462 | 0.000123 | 0.001566 | 1.171006 |
| VPS18     | 0.693915 | -0.32814 | 4.756286 | 0.000123 | 0.001566 | 1.170613 |
| EPM2AIP1  | -1.0125  | 0.263721 | -4.75555 | 0.000123 | 0.001568 | 1.168982 |
| ARID5B    | -1.20952 | 1.099138 | -4.75521 | 0.000123 | 0.001568 | 1.168222 |
| KLK14     | 1.02446  | -0.65501 | 4.754604 | 0.000123 | 0.001569 | 1.166866 |
| CTRB2     | 1.453806 | -0.76929 | 4.754105 | 0.000123 | 0.00157  | 1.165754 |
| LMO1      | 2.19247  | -0.86635 | 4.753866 | 0.000123 | 0.00157  | 1.165221 |
| POLR1A    | 1.487755 | -0.78882 | 4.753151 | 0.000124 | 0.001571 | 1.163628 |
| ITPKC     | -1.39302 | 0.788115 | -4.7502  | 0.000124 | 0.001581 | 1.157057 |
| PGK1      | -1.35005 | 0.679293 | -4.74985 | 0.000125 | 0.001581 | 1.156266 |
| SCFD1     | -2.1089  | 0.928435 | -4.74872 | 0.000125 | 0.001584 | 1.153762 |
| VWA1      | 1.440695 | -0.63423 | 4.746676 | 0.000125 | 0.00159  | 1.149199 |
| C17orf65  | 1.291783 | -0.67676 | 4.746565 | 0.000125 | 0.00159  | 1.148952 |
| HIST1H2BE | -1.61304 | 1.529275 | -4.74627 | 0.000126 | 0.00159  | 1.148304 |
| SLC5A2    | 1.312843 | -0.68094 | 4.745911 | 0.000126 | 0.001591 | 1.147496 |
| TCERG1L   | 1.369023 | -0.60688 | 4.790339 | 0.00013  | 0.001619 | 1.145062 |

|           |          |          |          |          |          |          |
|-----------|----------|----------|----------|----------|----------|----------|
| FKBP1A    | -2.38033 | 1.234676 | -4.74435 | 0.000126 | 0.001595 | 1.14402  |
| MRPL51    | -1.0837  | 1.025491 | -4.74295 | 0.000127 | 0.001599 | 1.140905 |
| AQR       | -1.1759  | 0.782647 | -4.74288 | 0.000127 | 0.001599 | 1.140746 |
| COX17     | -1.12772 | 0.925154 | -4.74257 | 0.000127 | 0.001599 | 1.14005  |
| ASPHD1    | 2.209083 | -0.87244 | 4.74094  | 0.000127 | 0.001604 | 1.136415 |
| FTO       | 1.16343  | -0.6014  | 4.73979  | 0.000127 | 0.001607 | 1.133852 |
| LOC494558 | 2.12064  | -0.88469 | 4.736915 | 0.000128 | 0.001617 | 1.127443 |
| PANK1     | 1.708114 | -0.71492 | 4.73663  | 0.000128 | 0.001617 | 1.126808 |
| TDRD9     | -2.72336 | 1.769601 | -4.73638 | 0.000128 | 0.001617 | 1.126261 |
| LMAN1L    | 0.991036 | -0.55286 | 4.735844 | 0.000129 | 0.001617 | 1.125056 |
| TGOLN2    | -1.26493 | 0.811664 | -4.73473 | 0.000129 | 0.001619 | 1.122566 |
| C1orf177  | 1.121331 | -0.48898 | 4.733915 | 0.000129 | 0.001619 | 1.120756 |
| DECR1     | -0.88446 | 0.424248 | -4.73367 | 0.000129 | 0.001619 | 1.120201 |
| SMAD2     | -0.7555  | 0.477099 | -4.73342 | 0.000129 | 0.001619 | 1.119658 |
| LOC389607 | 1.120106 | -0.65376 | 4.733406 | 0.000129 | 0.001619 | 1.119621 |
| PRKD2     | 0.778361 | -0.15876 | 4.733378 | 0.000129 | 0.001619 | 1.119559 |
| C7orf11   | -0.91083 | 0.483891 | -4.73289 | 0.000129 | 0.001619 | 1.118482 |
| SFTA2     | 2.083731 | -0.79233 | 4.732811 | 0.00013  | 0.001619 | 1.118295 |
| LOC157746 | 1.951409 | -0.7828  | 4.732771 | 0.00013  | 0.001619 | 1.118204 |
| KRTDAP    | 2.371631 | -1.4938  | 4.820499 | 0.00014  | 0.001687 | 1.117199 |
| ITLN2     | 1.382359 | -0.55336 | 4.731041 | 0.00013  | 0.001623 | 1.114349 |
| MAP3K8    | -1.56375 | 0.546476 | -4.73101 | 0.00013  | 0.001623 | 1.114276 |
| TRIM11    | -0.86668 | 0.404695 | -4.7302  | 0.00013  | 0.001625 | 1.112478 |
| LIMK2     | -2.11889 | 1.457783 | -4.72937 | 0.000131 | 0.001627 | 1.110627 |
| GRB10     | -2.16735 | 1.288922 | -4.72879 | 0.000131 | 0.001628 | 1.109327 |
| RNF38     | -1.18396 | 0.598151 | -4.728   | 0.000131 | 0.001629 | 1.10757  |
| DLK2      | 1.173364 | -0.82348 | 4.727989 | 0.000131 | 0.001629 | 1.107543 |
| CMTM3     | -1.43833 | 1.13825  | -4.72788 | 0.000131 | 0.001629 | 1.107306 |
| C19orf50  | -1.24725 | 1.006201 | -4.72698 | 0.000131 | 0.001631 | 1.105304 |
| CD22      | -1.67976 | 1.761844 | -4.72628 | 0.000131 | 0.001632 | 1.103735 |
| IGBP1     | -1.00359 | 0.582582 | -4.7262  | 0.000132 | 0.001632 | 1.103547 |
| ACTR3     | -1.74651 | 0.954449 | -4.72541 | 0.000132 | 0.001633 | 1.101804 |
| OTOS      | 1.872867 | -0.81731 | 4.724948 | 0.000132 | 0.001633 | 1.100764 |
| SSH3      | -1.45432 | 1.28091  | -4.72492 | 0.000132 | 0.001633 | 1.100702 |
| CLDN17    | 1.773866 | -0.73935 | 4.724701 | 0.000132 | 0.001633 | 1.100213 |
| TMEM14A   | 1.796779 | -0.74532 | 4.724391 | 0.000132 | 0.001633 | 1.099522 |
| CLCNKA    | 1.752624 | -0.85844 | 4.723272 | 0.000132 | 0.001633 | 1.097027 |
| CDK5RAP3  | -0.87592 | 0.5686   | -4.72309 | 0.000132 | 0.001633 | 1.096614 |
| CD82      | -1.44604 | 0.882621 | -4.72295 | 0.000133 | 0.001633 | 1.096312 |
| UTP11L    | -0.93638 | 0.658026 | -4.72294 | 0.000133 | 0.001633 | 1.096282 |
| LAPTM5    | -1.32769 | 0.930014 | -4.72289 | 0.000133 | 0.001633 | 1.096185 |
| MFAP2     | 1.948762 | -0.89823 | 4.722759 | 0.000133 | 0.001633 | 1.095881 |
| CST7      | -2.7523  | 1.541017 | -4.72232 | 0.000133 | 0.001633 | 1.094911 |
| KISS1R    | 1.131649 | -0.62847 | 4.722014 | 0.000133 | 0.001633 | 1.094222 |
| ELFN1     | 1.29421  | -0.6645  | 4.721938 | 0.000133 | 0.001633 | 1.094053 |
| FGF9      | 0.921949 | -0.9405  | 4.72171  | 0.000133 | 0.001633 | 1.093543 |
| DMBX1     | 1.334587 | -0.603   | 4.766361 | 0.000137 | 0.001661 | 1.093124 |

|           |          |          |          |          |          |          |
|-----------|----------|----------|----------|----------|----------|----------|
| TRIM58    | 2.844456 | -1.37983 | 4.720746 | 0.000133 | 0.001636 | 1.091393 |
| LOC643650 | -0.87766 | 0.178827 | -4.71912 | 0.000134 | 0.001641 | 1.087761 |
| PRR5-ARH1 | 1.702625 | -0.66667 | 4.718443 | 0.000134 | 0.001643 | 1.086257 |
| C17orf78  | -1.59737 | 0.295895 | -4.71807 | 0.000134 | 0.001643 | 1.085417 |
| AP2A2     | -0.79353 | 0.748039 | -4.71657 | 0.000134 | 0.001648 | 1.082091 |
| NEUROG3   | 1.959787 | -0.76398 | 4.716224 | 0.000135 | 0.001648 | 1.081308 |
| ERLIN1    | -2.41507 | 1.040776 | -4.71502 | 0.000135 | 0.00165  | 1.078626 |
| TARS      | -1.13843 | 0.745771 | -4.71497 | 0.000135 | 0.00165  | 1.078522 |
| ATOH7     | -1.04539 | 0.255024 | -4.71484 | 0.000135 | 0.00165  | 1.078213 |
| SOCS1     | -1.98496 | 1.227549 | -4.71407 | 0.000135 | 0.001652 | 1.076515 |
| ITGB1BP1  | -0.58834 | 0.266873 | -4.71374 | 0.000135 | 0.001652 | 1.075773 |
| OR4N4     | -1.21385 | 0.120713 | -4.71209 | 0.000136 | 0.001658 | 1.072099 |
| PTPLA     | 1.553798 | -1.00031 | 4.711592 | 0.000136 | 0.001658 | 1.070979 |
| LOC100290 | 0.843041 | -0.41876 | 4.711277 | 0.000136 | 0.001658 | 1.070277 |
| G6PC2     | 1.974818 | -0.82297 | 4.711141 | 0.000136 | 0.001658 | 1.069973 |
| NOS3      | 1.029608 | -0.47767 | 4.710297 | 0.000136 | 0.00166  | 1.06809  |
| SLC12A9   | -0.91229 | 0.591264 | -4.70939 | 0.000137 | 0.001661 | 1.066063 |
| PLEKHM2   | -0.87335 | 0.893225 | -4.70929 | 0.000137 | 0.001661 | 1.065853 |
| TBCB      | -0.67102 | 0.304572 | -4.70855 | 0.000137 | 0.001662 | 1.0642   |
| LOC729603 | -1.65743 | 1.609635 | -4.70832 | 0.000137 | 0.001662 | 1.063672 |
| N4BP2L2   | -1.94633 | 1.174049 | -4.70817 | 0.000137 | 0.001662 | 1.063344 |
| GUCA1C    | 3.282862 | -0.68743 | 4.907515 | 0.000162 | 0.001822 | 1.056507 |
| C18orf34  | -1.11708 | 0.001518 | -4.70322 | 0.000139 | 0.001679 | 1.052311 |
| HYAL1     | -1.29212 | 0.725701 | -4.70286 | 0.000139 | 0.00168  | 1.051492 |
| CTSA      | -1.55959 | 1.263274 | -4.70164 | 0.000139 | 0.001683 | 1.048789 |
| SLC39A13  | -0.72    | 0.50181  | -4.70005 | 0.00014  | 0.001687 | 1.045242 |
| HNRNPA1   | -0.9599  | 0.694402 | -4.69998 | 0.00014  | 0.001687 | 1.045086 |
| RAPGEF3   | 1.293994 | -0.67311 | 4.699887 | 0.00014  | 0.001687 | 1.044869 |
| TINF2     | -0.50138 | 0.184103 | -4.69928 | 0.00014  | 0.001687 | 1.043522 |
| SLC7A13   | 2.142025 | -0.80659 | 4.742876 | 0.000144 | 0.001708 | 1.042217 |
| PNMAL2    | 1.452454 | -0.7079  | 4.698439 | 0.00014  | 0.001689 | 1.041637 |
| PRPS1     | 1.037481 | -0.62296 | 4.698353 | 0.00014  | 0.001689 | 1.041446 |
| SNX17     | -0.91825 | 0.651502 | -4.69818 | 0.00014  | 0.001689 | 1.041067 |
| POU3F1    | 1.011875 | -0.63486 | 4.697765 | 0.00014  | 0.001689 | 1.040134 |
| PTH2      | 1.298812 | -0.67567 | 4.697263 | 0.000141 | 0.001689 | 1.039015 |
| LOC100651 | -2.85249 | 1.50933  | -4.69709 | 0.000141 | 0.001689 | 1.038628 |
| DNASE1L1  | -1.18889 | 0.563994 | -4.69688 | 0.000141 | 0.001689 | 1.038161 |
| MED6      | -0.67819 | 0.337716 | -4.69669 | 0.000141 | 0.001689 | 1.037742 |
| DUSP4     | 1.511346 | -0.6208  | 4.695335 | 0.000141 | 0.001693 | 1.034713 |
| PEX5L     | -1.18224 | 0.354756 | -4.69517 | 0.000141 | 0.001693 | 1.034338 |
| FOXH1     | 2.33452  | -1.01569 | 4.69496  | 0.000141 | 0.001693 | 1.033876 |
| GAGE1     | -1.12411 | 0.285077 | -4.69417 | 0.000142 | 0.001695 | 1.032112 |
| PCMTD2    | -2.73333 | 1.775381 | -4.69349 | 0.000142 | 0.001697 | 1.030597 |
| ADAMTSL2  | 1.362859 | -0.94688 | 4.692591 | 0.000142 | 0.001698 | 1.028589 |
| ILKAP     | -0.82668 | 0.595028 | -4.69251 | 0.000142 | 0.001698 | 1.028407 |
| CCDC24    | -1.0997  | 1.016488 | -4.69225 | 0.000142 | 0.001698 | 1.027824 |
| PARK2     | -1.35868 | 0.245533 | -4.69181 | 0.000142 | 0.001699 | 1.026851 |

|           |          |          |          |          |          |          |
|-----------|----------|----------|----------|----------|----------|----------|
| WDR45     | 1.16287  | -0.61709 | 4.691362 | 0.000143 | 0.0017   | 1.025846 |
| IRAK4     | -1.73135 | 0.562227 | -4.69113 | 0.000143 | 0.0017   | 1.025338 |
| KRTAP3-1  | 1.38035  | -0.6656  | 4.689772 | 0.000143 | 0.001704 | 1.022299 |
| TSNAX     | -1.84353 | 0.900523 | -4.68956 | 0.000143 | 0.001704 | 1.021817 |
| SSC5D     | 1.26603  | -0.67222 | 4.68868  | 0.000143 | 0.001705 | 1.019863 |
| C8orf76   | -0.95212 | 0.300602 | -4.68867 | 0.000143 | 0.001705 | 1.019831 |
| MICAL2    | 2.039652 | -0.85487 | 4.688471 | 0.000143 | 0.001705 | 1.019396 |
| HOXD13    | 0.942589 | -0.68244 | 4.687949 | 0.000144 | 0.001705 | 1.018231 |
| IRAK2     | 0.98443  | -0.78685 | 4.687768 | 0.000144 | 0.001705 | 1.017828 |
| RBMX2     | -0.7683  | 0.631161 | -4.68762 | 0.000144 | 0.001705 | 1.017506 |
| NME2P1    | 0.868166 | -0.59452 | 4.685819 | 0.000144 | 0.00171  | 1.013478 |
| ZNF79     | -0.67579 | 0.754842 | -4.68522 | 0.000145 | 0.001712 | 1.012143 |
| SEC22B    | -0.86404 | 0.536643 | -4.68476 | 0.000145 | 0.001712 | 1.011109 |
| ZDHHC20   | -2.34018 | 0.973656 | -4.68446 | 0.000145 | 0.001713 | 1.010442 |
| TMEM151   | 1.070591 | -0.63915 | 4.68391  | 0.000145 | 0.001714 | 1.009218 |
| CCR5      | 1.477715 | -0.89811 | 4.683047 | 0.000145 | 0.001715 | 1.007292 |
| PMCHL1    | -1.61293 | 0.338901 | -4.68286 | 0.000145 | 0.001715 | 1.006882 |
| GRB2      | -1.47306 | 0.930756 | -4.68261 | 0.000145 | 0.001715 | 1.006324 |
| RPLP2     | 1.925755 | -1.54132 | 4.682456 | 0.000145 | 0.001715 | 1.005973 |
| DRG1      | -0.7342  | 0.558468 | -4.68228 | 0.000146 | 0.001715 | 1.005574 |
| LOC387723 | 1.58092  | -0.77643 | 4.680722 | 0.000146 | 0.00172  | 1.002103 |
| NHLRC3    | -1.0808  | 0.333783 | -4.67923 | 0.000147 | 0.001725 | 0.998778 |
| SEZ6L2    | 1.233525 | -0.68435 | 4.678623 | 0.000147 | 0.001726 | 0.997417 |
| ZC3H12A   | -1.55752 | 1.187689 | -4.67791 | 0.000147 | 0.001728 | 0.995832 |
| CD300LB   | 1.097566 | -0.29763 | 4.676763 | 0.000147 | 0.001732 | 0.993266 |
| CIRBP     | -0.89368 | 0.471504 | -4.6761  | 0.000148 | 0.001733 | 0.991788 |
| KLF17     | 0.917496 | -0.37987 | 4.760186 | 0.00016  | 0.001819 | 0.991014 |
| DKFZp761f | -1.03032 | 0.208614 | -4.67521 | 0.000148 | 0.001735 | 0.989809 |
| ALOX12P2  | 1.01416  | -0.42095 | 4.675212 | 0.000148 | 0.001735 | 0.989803 |
| RDH5      | -1.17099 | 0.95229  | -4.67318 | 0.000149 | 0.001742 | 0.985272 |
| GOPC      | -0.7952  | 0.508126 | -4.67241 | 0.000149 | 0.001744 | 0.98356  |
| TMCC3     | 1.188995 | -0.40163 | 4.670589 | 0.00015  | 0.001747 | 0.979484 |
| JKAMP     | -1.24895 | 0.283258 | -4.67041 | 0.00015  | 0.001747 | 0.979096 |
| ANKRD10   | -0.89511 | 0.671255 | -4.67025 | 0.00015  | 0.001747 | 0.978734 |
| CRYBA4    | 2.001046 | -0.82683 | 4.670213 | 0.00015  | 0.001747 | 0.978646 |
| OR10A5    | 1.168129 | -0.59284 | 4.67014  | 0.00015  | 0.001747 | 0.978483 |
| CYP24A1   | 1.870762 | -0.79141 | 4.669671 | 0.00015  | 0.001747 | 0.977435 |
| SOX3      | 1.407237 | -0.35503 | 4.66966  | 0.00015  | 0.001747 | 0.97741  |
| FMO5      | 0.995186 | -0.49993 | 4.669613 | 0.00015  | 0.001747 | 0.977306 |
| STRADB    | 2.794668 | -1.45651 | 4.668343 | 0.00015  | 0.001751 | 0.974471 |
| ALOXE3    | 1.357288 | -0.67996 | 4.667662 | 0.000151 | 0.001753 | 0.97295  |
| MDH1B     | -1.04688 | 0.172786 | -4.71032 | 0.000155 | 0.001787 | 0.971581 |
| FUT7      | -2.02894 | 1.334782 | -4.66597 | 0.000151 | 0.001759 | 0.969165 |
| POFUT2    | -1.04469 | 0.940045 | -4.664   | 0.000152 | 0.001766 | 0.964765 |
| HCN4      | 1.029545 | -0.68387 | 4.662596 | 0.000152 | 0.00177  | 0.961641 |
| NPTN      | -1.5045  | 0.728411 | -4.66253 | 0.000152 | 0.00177  | 0.961495 |
| ACTL6B    | 0.71832  | -0.45502 | 4.662057 | 0.000153 | 0.001771 | 0.960437 |



|           |          |          |          |          |          |          |
|-----------|----------|----------|----------|----------|----------|----------|
| EHMT1     | -1.08215 | 1.013442 | -4.66095 | 0.000153 | 0.001774 | 0.957968 |
| FAM110B   | -1.70021 | 0.658314 | -4.66031 | 0.000153 | 0.001774 | 0.956527 |
| VRK2      | -1.16668 | 0.246219 | -4.66029 | 0.000153 | 0.001774 | 0.956499 |
| C2orf47   | -0.94542 | 0.391261 | -4.66014 | 0.000153 | 0.001774 | 0.956159 |
| ABCC4     | 1.334294 | -0.3765  | 4.659338 | 0.000153 | 0.001776 | 0.954366 |
| LDHD      | 1.35029  | -0.73966 | 4.659082 | 0.000154 | 0.001776 | 0.953794 |
| CRADD     | -0.8769  | 0.425044 | -4.65707 | 0.000154 | 0.001784 | 0.94931  |
| TSPO      | -1.56146 | 0.991055 | -4.65671 | 0.000154 | 0.001784 | 0.948504 |
| ECE1      | -1.73625 | 1.250069 | -4.65649 | 0.000155 | 0.001784 | 0.948018 |
| SLC9A5    | 0.74509  | -0.4342  | 4.655867 | 0.000155 | 0.001785 | 0.946615 |
| C5orf22   | -0.72965 | 0.205282 | -4.65508 | 0.000155 | 0.001787 | 0.944849 |
| PLEKHB2   | -1.11259 | 0.753215 | -4.65435 | 0.000155 | 0.001789 | 0.943232 |
| LOC64320  | 1.863562 | -0.90133 | 4.653866 | 0.000155 | 0.00179  | 0.942147 |
| SIRPD     | -1.85702 | 1.076968 | -4.65352 | 0.000156 | 0.00179  | 0.941382 |
| FBXL22    | 1.068487 | -0.53145 | 4.651747 | 0.000156 | 0.001796 | 0.937416 |
| DNAJC12   | 1.201449 | -0.18871 | 4.651619 | 0.000156 | 0.001796 | 0.937129 |
| SPINK7    | 1.035171 | -0.56162 | 4.650195 | 0.000157 | 0.001801 | 0.933948 |
| PIK3AP1   | -2.1805  | 1.462791 | -4.64811 | 0.000158 | 0.001807 | 0.929295 |
| MANBAL    | -0.45364 | 0.245806 | -4.64811 | 0.000158 | 0.001807 | 0.929286 |
| C20orf141 | 1.426272 | -0.82042 | 4.647091 | 0.000158 | 0.00181  | 0.927017 |
| LOC72944  | -0.87339 | 0.284224 | -4.64589 | 0.000158 | 0.001814 | 0.924344 |
| GALE      | -0.79013 | 0.491106 | -4.64509 | 0.000159 | 0.001817 | 0.922543 |
| RNF141    | -1.31918 | 0.806811 | -4.64453 | 0.000159 | 0.001817 | 0.921307 |
| EGFL6     | 1.104818 | -0.5034  | 4.644513 | 0.000159 | 0.001817 | 0.92126  |
| HMGCS1    | -1.12667 | 0.602154 | -4.64413 | 0.000159 | 0.001817 | 0.920397 |
| UGCG      | -2.42474 | 1.355251 | -4.64394 | 0.000159 | 0.001817 | 0.919972 |
| MAGEA6    | 1.436659 | -0.72313 | 4.642874 | 0.000159 | 0.001819 | 0.917598 |
| LOC100506 | 0.967027 | -0.5992  | 4.642736 | 0.00016  | 0.001819 | 0.917291 |
| ALKBH1    | -0.52172 | 0.398232 | -4.64216 | 0.00016  | 0.00182  | 0.916015 |
| PTGDS     | 2.08316  | -1.22613 | 4.642116 | 0.00016  | 0.00182  | 0.915904 |
| LOC72991  | -2.17485 | 1.44143  | -4.64183 | 0.00016  | 0.00182  | 0.91526  |
| SLC41A3   | 1.44712  | -0.88334 | 4.641406 | 0.00016  | 0.001821 | 0.91432  |
| EXT1      | -1.76046 | 1.178141 | -4.641   | 0.00016  | 0.001821 | 0.913408 |
| CADPS2    | 2.174524 | -0.81611 | 4.640289 | 0.00016  | 0.001822 | 0.911824 |
| MIER2     | 1.175392 | -0.39903 | 4.640173 | 0.00016  | 0.001822 | 0.911566 |
| COL11A2   | 1.550938 | -0.89418 | 4.639959 | 0.000161 | 0.001822 | 0.911088 |
| SLC34A2   | -1.27963 | 0.122824 | -4.63937 | 0.000161 | 0.001822 | 0.90978  |
| RAD51B    | 2.010423 | -0.89663 | 4.63918  | 0.000161 | 0.001822 | 0.909348 |
| TDRD10    | -1.52984 | 0.450893 | -4.63887 | 0.000161 | 0.001822 | 0.908653 |
| PRRC2A    | -1.21258 | 1.286273 | -4.63852 | 0.000161 | 0.001822 | 0.907863 |
| KRTAP1-5  | 1.992119 | -0.68521 | 4.638411 | 0.000161 | 0.001822 | 0.90763  |
| SLC6A10P  | 2.582801 | -1.03253 | 4.638321 | 0.000161 | 0.001822 | 0.907429 |
| RLIM      | -1.16427 | 0.610938 | -4.63825 | 0.000161 | 0.001822 | 0.90728  |
| ZNF440    | -0.76466 | 0.298028 | -4.63735 | 0.000162 | 0.001822 | 0.905258 |
| CYTH4     | -1.81187 | 1.033182 | -4.63728 | 0.000162 | 0.001822 | 0.905101 |
| RQCD1     | -0.73084 | 0.498715 | -4.63725 | 0.000162 | 0.001822 | 0.905037 |
| IL1R2     | -4.10913 | 2.035715 | -4.6372  | 0.000162 | 0.001822 | 0.904927 |

|           |          |          |          |          |          |          |
|-----------|----------|----------|----------|----------|----------|----------|
| LRRC41    | -0.97573 | 1.079934 | -4.63632 | 0.000162 | 0.001824 | 0.902963 |
| RHOV      | 1.902729 | -0.81676 | 4.63598  | 0.000162 | 0.001824 | 0.9022   |
| THY1      | 1.401203 | -0.83298 | 4.635203 | 0.000162 | 0.001827 | 0.900463 |
| CACNA1A   | 1.499774 | -0.67373 | 4.634384 | 0.000163 | 0.001829 | 0.898634 |
| HEATR7B2  | 0.918165 | -0.27115 | 4.634271 | 0.000163 | 0.001829 | 0.898381 |
| RAPSN     | 1.691407 | -0.58793 | 4.633221 | 0.000163 | 0.001829 | 0.896036 |
| SRBD1     | -1.00212 | 0.627885 | -4.63301 | 0.000163 | 0.001829 | 0.895569 |
| MSLNL     | 1.848303 | -0.84716 | 4.632962 | 0.000163 | 0.001829 | 0.895458 |
| MED20     | -0.84404 | 0.521551 | -4.63292 | 0.000163 | 0.001829 | 0.895365 |
| FBXO18    | -0.7631  | 0.737164 | -4.63283 | 0.000163 | 0.001829 | 0.895166 |
| HOOK2     | -0.76383 | 0.664095 | -4.6325  | 0.000163 | 0.00183  | 0.89442  |
| CAMK2N2   | 0.914099 | -0.55815 | 4.632269 | 0.000163 | 0.00183  | 0.893909 |
| ACSS2     | -1.23393 | 0.781009 | -4.63163 | 0.000164 | 0.001831 | 0.892482 |
| TNFSF9    | 1.300192 | -0.77498 | 4.630597 | 0.000164 | 0.001835 | 0.890173 |
| FBXL6     | -0.73541 | 0.6789   | -4.62926 | 0.000165 | 0.001839 | 0.887182 |
| PDLIM3    | -1.48182 | 0.296365 | -4.6291  | 0.000165 | 0.001839 | 0.886828 |
| PRRG3     | 1.338995 | -0.57252 | 4.62849  | 0.000165 | 0.001841 | 0.885467 |
| KIF19     | 1.27819  | -0.53582 | 4.627764 | 0.000165 | 0.001842 | 0.883844 |
| FLJ38773  | 0.910596 | -0.23541 | 4.627617 | 0.000165 | 0.001842 | 0.883517 |
| B3GALT2   | 2.072731 | -0.83575 | 4.627155 | 0.000165 | 0.001843 | 0.882484 |
| GNAO1     | 0.887495 | -0.37613 | 4.626046 | 0.000166 | 0.001846 | 0.880006 |
| FOXL1     | 1.233305 | -0.65196 | 4.625801 | 0.000166 | 0.001846 | 0.879459 |
| APOBEC3B  | -1.72646 | 1.328201 | -4.6258  | 0.000166 | 0.001846 | 0.879453 |
| FLJ23865  | 0.885324 | -0.51113 | 4.625021 | 0.000166 | 0.001848 | 0.877717 |
| LOC729866 | -1.05109 | 0.030198 | -4.66683 | 0.000171 | 0.001875 | 0.877151 |
| LILRB2    | -1.50842 | 0.91457  | -4.62397 | 0.000167 | 0.001851 | 0.875362 |
| SBK2      | 1.700665 | -0.74965 | 4.623469 | 0.000167 | 0.001852 | 0.874249 |
| ARHGEF16  | 1.974709 | -0.83321 | 4.623263 | 0.000167 | 0.001852 | 0.873787 |
| PABPC4L   | 1.985693 | -0.67311 | 4.623071 | 0.000167 | 0.001852 | 0.873359 |
| TXNDC17   | -1.59042 | 0.547249 | -4.62263 | 0.000167 | 0.001852 | 0.872373 |
| CST2      | 1.392284 | -0.9005  | 4.622305 | 0.000167 | 0.001852 | 0.871648 |
| DENND2C   | -1.79183 | 0.450906 | -4.62227 | 0.000167 | 0.001852 | 0.871578 |
| FOXD3     | 0.714962 | -0.69972 | 4.622074 | 0.000167 | 0.001852 | 0.871132 |
| C1orf170  | 1.787714 | -0.73341 | 4.621269 | 0.000168 | 0.001855 | 0.869334 |
| LCE1D     | 0.982972 | -0.60492 | 4.617439 | 0.000169 | 0.001869 | 0.860774 |
| GSTK1     | -0.81995 | 0.30955  | -4.61738 | 0.000169 | 0.001869 | 0.860632 |
| C8orf55   | 1.254416 | -0.58512 | 4.617063 | 0.000169 | 0.00187  | 0.859934 |
| ISLR      | 1.171476 | -0.72088 | 4.616465 | 0.00017  | 0.00187  | 0.858599 |
| LOC100506 | 0.671463 | -0.3108  | 4.616374 | 0.00017  | 0.00187  | 0.858394 |
| OR10G8    | 1.914576 | -0.74777 | 4.615983 | 0.00017  | 0.00187  | 0.857522 |
| OBP2B     | 2.278245 | -0.7267  | 4.615698 | 0.00017  | 0.00187  | 0.856884 |
| LOC339246 | 1.231474 | -0.64308 | 4.615692 | 0.00017  | 0.00187  | 0.856871 |
| ZNF691    | -0.62548 | 0.552339 | -4.61522 | 0.00017  | 0.001871 | 0.855808 |
| LOC100285 | 1.727576 | -0.84629 | 4.614766 | 0.00017  | 0.001872 | 0.854802 |
| PIGF      | -1.14012 | 0.454659 | -4.61458 | 0.00017  | 0.001872 | 0.854382 |
| LCE3D     | 1.629858 | -0.77967 | 4.614235 | 0.00017  | 0.001872 | 0.853615 |
| ITGB7     | 1.61863  | -0.66087 | 4.614048 | 0.00017  | 0.001872 | 0.853198 |

|          |          |          |          |          |          |          |
|----------|----------|----------|----------|----------|----------|----------|
| ANKRD53  | 1.288508 | -0.56024 | 4.6137   | 0.000171 | 0.001873 | 0.85242  |
| TOR1AIP1 | -1.64848 | 1.163912 | -4.61295 | 0.000171 | 0.001875 | 0.850751 |
| COL4A2   | 0.909715 | -0.60013 | 4.61162  | 0.000171 | 0.001879 | 0.847771 |
| TDH      | -1.89917 | 0.615086 | -4.61021 | 0.000172 | 0.001884 | 0.844613 |
| FLJ45340 | -1.29402 | 0.887309 | -4.60976 | 0.000172 | 0.001885 | 0.843623 |
| NLRP14   | 1.736241 | -0.77275 | 4.609259 | 0.000172 | 0.001885 | 0.842495 |
| CXCL16   | -1.43212 | 0.445884 | -4.60924 | 0.000172 | 0.001885 | 0.842461 |
| PATL1    | -1.23746 | 0.814178 | -4.60798 | 0.000173 | 0.001889 | 0.83963  |
| JAK3     | -1.11719 | 0.793086 | -4.60745 | 0.000173 | 0.00189  | 0.838453 |
| LRP3     | 1.375874 | -0.68305 | 4.606747 | 0.000173 | 0.001892 | 0.836881 |
| MXRA8    | 1.068416 | -0.55481 | 4.605591 | 0.000174 | 0.001896 | 0.834298 |
| TCF21    | 2.290141 | -0.7021  | 4.603384 | 0.000175 | 0.001905 | 0.829363 |
| RFC2     | -0.92922 | 0.743406 | -4.60167 | 0.000175 | 0.001912 | 0.825537 |
| SLTM     | -0.68896 | 0.301929 | -4.60131 | 0.000176 | 0.001912 | 0.824719 |
| FLJ43860 | 1.535052 | -0.74679 | 4.6009   | 0.000176 | 0.001913 | 0.823812 |
| CAPN10   | -1.0422  | 0.809152 | -4.59871 | 0.000177 | 0.001921 | 0.818925 |
| GPR183   | 1.678518 | -1.42727 | 4.598521 | 0.000177 | 0.001921 | 0.818494 |
| HBS1L    | -0.80748 | 0.093813 | -4.59818 | 0.000177 | 0.001922 | 0.817729 |
| GNG5     | -1.16346 | 0.859974 | -4.59744 | 0.000177 | 0.001924 | 0.816087 |
| NOTCH3   | 1.580539 | -0.93764 | 4.629376 | 0.000186 | 0.001982 | 0.815534 |
| IL9      | 1.599941 | -0.2681  | 4.638485 | 0.000182 | 0.001963 | 0.815525 |
| KDM5B    | -0.98294 | 1.093142 | -4.59645 | 0.000178 | 0.001927 | 0.813874 |
| PRM2     | 1.266288 | -0.85327 | 4.636639 | 0.000183 | 0.001967 | 0.811511 |
| RNF148   | -1.46577 | 0.243837 | -4.62712 | 0.000187 | 0.001987 | 0.810658 |
| RB1      | -1.29435 | 0.560493 | -4.59484 | 0.000178 | 0.001933 | 0.810257 |
| C9orf131 | -1.05183 | 0.771761 | -4.59466 | 0.000178 | 0.001933 | 0.809856 |
| CWC25    | -0.77299 | 0.68959  | -4.59364 | 0.000179 | 0.001937 | 0.807586 |
| KBTBD5   | 2.378935 | -0.77682 | 4.592453 | 0.000179 | 0.001941 | 0.804929 |
| CEACAM3  | -1.79568 | 1.267843 | -4.59233 | 0.000179 | 0.001941 | 0.804647 |
| ELSPBP1  | 0.967288 | -0.2664  | 4.848687 | 0.000218 | 0.002174 | 0.803266 |
| LOC22144 | -1.49829 | 0.956962 | -4.59148 | 0.00018  | 0.001943 | 0.802761 |
| DEDD     | -0.79405 | 0.644642 | -4.58957 | 0.00018  | 0.001951 | 0.79849  |
| FLJ11235 | -0.68007 | 0.231398 | -4.58915 | 0.000181 | 0.001952 | 0.797554 |
| STXBP3   | -1.4301  | 0.486414 | -4.58756 | 0.000181 | 0.001958 | 0.793996 |
| CALY     | 1.533088 | -0.64363 | 4.586895 | 0.000182 | 0.00196  | 0.792504 |
| SCT      | 0.891174 | -0.2633  | 4.585866 | 0.000182 | 0.001963 | 0.790204 |
| SPTBN2   | 0.848403 | -0.52731 | 4.585701 | 0.000182 | 0.001963 | 0.789833 |
| ZNF565   | -0.74535 | 0.464282 | -4.58548 | 0.000182 | 0.001963 | 0.789334 |
| C20orf46 | 1.069098 | -0.57537 | 4.584986 | 0.000182 | 0.001963 | 0.788237 |
| CNIH4    | -1.78339 | 0.365193 | -4.58442 | 0.000183 | 0.001964 | 0.786981 |
| DDN      | 1.198763 | -0.58751 | 4.584034 | 0.000183 | 0.001965 | 0.786108 |
| DNAH2    | 1.839128 | -0.63719 | 4.582455 | 0.000183 | 0.00197  | 0.782576 |
| TTBK1    | 1.554388 | -0.81847 | 4.581462 | 0.000184 | 0.001974 | 0.780356 |
| AUP1     | -0.79906 | 0.586782 | -4.58072 | 0.000184 | 0.001975 | 0.778705 |
| SMR3A    | 1.55655  | -0.8287  | 4.580662 | 0.000184 | 0.001975 | 0.778568 |
| MOB1A    | -0.87199 | 0.521323 | -4.58055 | 0.000184 | 0.001975 | 0.778315 |
| TBC1D15  | -1.04764 | 0.214134 | -4.58018 | 0.000184 | 0.001975 | 0.777484 |

|           |          |          |          |          |          |          |
|-----------|----------|----------|----------|----------|----------|----------|
| TAF10     | -0.63153 | 0.456392 | -4.57999 | 0.000184 | 0.001975 | 0.777058 |
| TBC1D3P2  | 1.424957 | -0.61106 | 4.579406 | 0.000185 | 0.001976 | 0.775759 |
| PNPLA6    | -1.301   | 0.754731 | -4.57925 | 0.000185 | 0.001976 | 0.775408 |
| RAB40C    | -1.19206 | 1.015387 | -4.57874 | 0.000185 | 0.001977 | 0.774279 |
| MYL12B    | -1.31473 | 0.819829 | -4.57836 | 0.000185 | 0.001978 | 0.773418 |
| HBQ1      | 3.056824 | -1.01024 | 4.578088 | 0.000185 | 0.001978 | 0.772811 |
| CA14      | 1.34019  | -0.73283 | 4.577887 | 0.000185 | 0.001978 | 0.772362 |
| BCAT1     | 1.026936 | -0.45347 | 4.577088 | 0.000186 | 0.001981 | 0.770577 |
| CCDC54    | -0.60415 | 0.258299 | -4.57662 | 0.000186 | 0.001982 | 0.769521 |
| PIGK      | -1.98118 | 0.405329 | -4.57546 | 0.000186 | 0.001985 | 0.76694  |
| IRAK1     | 0.989608 | -0.43432 | 4.575279 | 0.000186 | 0.001985 | 0.76653  |
| GABRA3    | 2.014005 | -0.79153 | 4.574077 | 0.000187 | 0.001987 | 0.763844 |
| C7orf44   | -1.14899 | 0.610439 | -4.57389 | 0.000187 | 0.001987 | 0.763421 |
| TRIM22    | -2.39296 | 1.379228 | -4.5735  | 0.000187 | 0.001987 | 0.762559 |
| CCR1      | -2.03837 | 1.306898 | -4.57342 | 0.000187 | 0.001987 | 0.762381 |
| PACRG     | 1.804605 | -0.86191 | 4.573254 | 0.000187 | 0.001987 | 0.762003 |
| C4orf34   | -1.29067 | 0.386339 | -4.57296 | 0.000187 | 0.001987 | 0.761348 |
| HYAL2     | -0.99335 | 0.30493  | -4.57289 | 0.000188 | 0.001987 | 0.761179 |
| GRINA     | -1.51616 | 0.996769 | -4.57268 | 0.000188 | 0.001987 | 0.760714 |
| FAM105A   | -1.62689 | 0.383565 | -4.57222 | 0.000188 | 0.001988 | 0.759688 |
| KRTAP10-1 | 0.82097  | -0.64179 | 4.571957 | 0.000188 | 0.001988 | 0.759102 |
| TDRD5     | 1.245924 | -0.34271 | 4.570599 | 0.000189 | 0.001993 | 0.756065 |
| ARHGEF10  | 2.11839  | -0.80692 | 4.570512 | 0.000189 | 0.001993 | 0.755872 |
| C9orf140  | -1.24929 | 0.707606 | -4.56961 | 0.000189 | 0.001995 | 0.753849 |
| TRPM8     | 1.373612 | -0.28969 | 4.569596 | 0.000189 | 0.001995 | 0.753823 |
| GGH       | -1.70463 | 0.983879 | -4.56901 | 0.000189 | 0.001996 | 0.752511 |
| IRF2BP1   | 1.324494 | -0.40194 | 4.568473 | 0.000189 | 0.001996 | 0.75131  |
| UCN2      | 1.270473 | -0.73516 | 4.568276 | 0.00019  | 0.001996 | 0.75087  |
| SLC36A3   | 1.504465 | -0.82911 | 4.568102 | 0.00019  | 0.001996 | 0.750482 |
| SLC26A10  | 2.357211 | -0.86656 | 4.568069 | 0.00019  | 0.001996 | 0.750408 |
| PKLR      | 1.708915 | -0.53575 | 4.565927 | 0.000191 | 0.002005 | 0.745617 |
| BPIFA3    | 1.253918 | -1.23017 | 4.606326 | 0.000196 | 0.002042 | 0.745566 |
| NMNAT2    | -1.36455 | 0.132804 | -4.64309 | 0.000206 | 0.002105 | 0.745235 |
| MAP3K1    | -1.05892 | 0.621203 | -4.56531 | 0.000191 | 0.002007 | 0.74424  |
| ASH2L     | -0.67379 | 0.380433 | -4.56305 | 0.000192 | 0.002015 | 0.739188 |
| XCR1      | 1.081283 | -0.54216 | 4.563008 | 0.000192 | 0.002015 | 0.739087 |
| LOC100506 | 1.49517  | -0.57593 | 4.562858 | 0.000192 | 0.002015 | 0.738752 |
| GMEB2     | -0.59531 | 0.327741 | -4.56204 | 0.000192 | 0.002017 | 0.736923 |
| KLHDC3    | -0.88537 | 0.75167  | -4.56195 | 0.000192 | 0.002017 | 0.736716 |
| MGC21881  | -1.40734 | 0.926038 | -4.56032 | 0.000193 | 0.002024 | 0.733067 |
| CRP       | 1.40034  | -0.64916 | 4.559169 | 0.000194 | 0.002028 | 0.730502 |
| FLJ31715  | 2.063296 | -0.79877 | 4.558934 | 0.000194 | 0.002028 | 0.729976 |
| MUT       | -1.17271 | 0.336258 | -4.55786 | 0.000194 | 0.002031 | 0.727565 |
| ELL2      | -1.69809 | 0.342858 | -4.55785 | 0.000194 | 0.002031 | 0.727562 |
| FGF4      | 1.617537 | -0.59308 | 4.557279 | 0.000194 | 0.002033 | 0.726273 |
| BST1      | -1.87509 | 1.040708 | -4.55678 | 0.000195 | 0.002034 | 0.725156 |
| KIAA0040  | -1.30897 | 1.036079 | -4.55608 | 0.000195 | 0.002036 | 0.723582 |

|           |          |          |          |          |          |          |
|-----------|----------|----------|----------|----------|----------|----------|
| PBXIP1    | 0.978046 | -0.30353 | 4.555773 | 0.000195 | 0.002036 | 0.722906 |
| ZNF841    | -0.78514 | 0.439616 | -4.55576 | 0.000195 | 0.002036 | 0.722876 |
| LGALS2    | 3.601813 | -1.65237 | 4.585093 | 0.000206 | 0.002102 | 0.719558 |
| DUSP15    | 1.74186  | -0.84807 | 4.554263 | 0.000196 | 0.002042 | 0.719528 |
| DPPA5     | 2.219266 | -1.42677 | 4.619611 | 0.000217 | 0.00217  | 0.717682 |
| SPDYE4    | 1.370783 | -0.99121 | 4.591837 | 0.000202 | 0.002089 | 0.714029 |
| TBCE      | -1.00602 | 0.535655 | -4.55132 | 0.000197 | 0.002054 | 0.712934 |
| NLRP10    | 0.564551 | -0.12833 | 4.550989 | 0.000197 | 0.002054 | 0.712205 |
| TCEANC    | 1.469618 | -0.89842 | 4.549556 | 0.000198 | 0.00206  | 0.708998 |
| ANKRD30B  | -1.68622 | 0.808128 | -4.58927 | 0.000204 | 0.002095 | 0.708433 |
| CALHM2    | 1.521708 | -0.52007 | 4.548603 | 0.000198 | 0.002061 | 0.706867 |
| GMPR      | 2.945284 | -1.08909 | 4.548392 | 0.000198 | 0.002061 | 0.706395 |
| ADCK4     | -1.64852 | 1.237156 | -4.54814 | 0.000199 | 0.002061 | 0.705841 |
| CBLL1     | 1.627472 | -1.03476 | 4.547976 | 0.000199 | 0.002061 | 0.705464 |
| GPX2      | 1.213823 | -0.66684 | 4.547935 | 0.000199 | 0.002061 | 0.705372 |
| KLF6      | -1.91172 | 1.230923 | -4.54782 | 0.000199 | 0.002061 | 0.705104 |
| DSCR8     | 2.260711 | -1.48222 | 4.623742 | 0.000215 | 0.00216  | 0.704518 |
| RTN1      | 2.029024 | -0.81544 | 4.547266 | 0.000199 | 0.002063 | 0.703875 |
| CTIF      | 1.272761 | -0.45743 | 4.546994 | 0.000199 | 0.002063 | 0.703268 |
| NACC2     | -1.14048 | 0.733094 | -4.54661 | 0.000199 | 0.002064 | 0.702402 |
| KIAA0415  | -0.57483 | 0.414345 | -4.54574 | 0.0002   | 0.002067 | 0.700456 |
| HAO2      | -1.13067 | 0.174314 | -4.54513 | 0.0002   | 0.002069 | 0.699089 |
| TBX2      | 1.086949 | -0.93913 | 5.091936 | 0.000275 | 0.002511 | 0.698858 |
| RPL36     | 1.606213 | -1.234   | 4.544096 | 0.0002   | 0.002073 | 0.696784 |
| PPP1R14D  | 1.184914 | -0.56609 | 4.543139 | 0.000201 | 0.002075 | 0.694643 |
| FAM48A    | -0.89054 | 0.625638 | -4.54309 | 0.000201 | 0.002075 | 0.694541 |
| EIF3B     | 1.198306 | -0.53546 | 4.542387 | 0.000201 | 0.002078 | 0.69296  |
| OR51E1    | -0.96054 | 0.264951 | -4.57081 | 0.000212 | 0.002143 | 0.688571 |
| NPHP3     | -1.24104 | 0.487118 | -4.53905 | 0.000203 | 0.002092 | 0.685495 |
| BRWD3     | -1.02419 | 0.926098 | -4.5387  | 0.000203 | 0.002092 | 0.684705 |
| SPPL2A    | -1.49705 | 0.352894 | -4.53771 | 0.000203 | 0.002095 | 0.682492 |
| IL31RA    | -1.45536 | 0.437796 | -4.53752 | 0.000204 | 0.002095 | 0.68208  |
| FAM127A   | -0.8638  | 0.754544 | -4.53675 | 0.000204 | 0.002095 | 0.680342 |
| KRT9      | 0.894051 | -0.63541 | 4.536539 | 0.000204 | 0.002095 | 0.679876 |
| ICAM1     | -1.37205 | 0.804817 | -4.53653 | 0.000204 | 0.002095 | 0.679856 |
| NMNAT1    | -1.24285 | 0.98267  | -4.53647 | 0.000204 | 0.002095 | 0.679717 |
| METTL7B   | -2.32264 | 1.367627 | -4.53611 | 0.000204 | 0.002096 | 0.678922 |
| EPB42     | 3.356621 | -1.04071 | 4.566271 | 0.000214 | 0.002157 | 0.678734 |
| TMSB10    | 1.132853 | -0.88573 | 4.535541 | 0.000204 | 0.002096 | 0.677644 |
| FLAD1     | -0.76928 | 0.793995 | -4.53533 | 0.000205 | 0.002096 | 0.67716  |
| HNF1A-AS1 | 2.158899 | -0.86112 | 4.535211 | 0.000205 | 0.002096 | 0.676906 |
| OR7G3     | 1.465436 | -0.71261 | 4.535144 | 0.000205 | 0.002096 | 0.676755 |
| HAUS4     | -1.85805 | 1.253452 | -4.53469 | 0.000205 | 0.002097 | 0.675749 |
| REEP6     | 1.038048 | -0.5385  | 4.534657 | 0.000205 | 0.002097 | 0.675667 |
| FAM7A1    | -1.76972 | 1.060028 | -4.53195 | 0.000206 | 0.002106 | 0.669616 |
| LOC100652 | -1.45089 | 0.815985 | -4.53185 | 0.000206 | 0.002106 | 0.669391 |
| HIST1H2BJ | -0.52404 | 0.072119 | -4.53066 | 0.000207 | 0.002111 | 0.666717 |

|           |          |          |          |          |          |          |
|-----------|----------|----------|----------|----------|----------|----------|
| FAM188A   | -1.4305  | 0.521663 | -4.53039 | 0.000207 | 0.002111 | 0.666123 |
| TEX101    | 0.870883 | -0.59556 | 4.528881 | 0.000208 | 0.002115 | 0.662742 |
| CSN1S1    | 1.99833  | -0.64365 | 4.528631 | 0.000208 | 0.002115 | 0.662181 |
| CD300LF   | -1.89734 | 0.98804  | -4.52858 | 0.000208 | 0.002115 | 0.662076 |
| ZNF589    | -0.6921  | 0.61363  | -4.5284  | 0.000208 | 0.002115 | 0.661663 |
| NAA60     | -1.38984 | 1.152059 | -4.52825 | 0.000208 | 0.002115 | 0.661325 |
| PGS1      | -1.03703 | 0.825816 | -4.52819 | 0.000208 | 0.002115 | 0.661202 |
| SELM      | 1.779812 | -1.06288 | 4.526999 | 0.000209 | 0.00212  | 0.65853  |
| SOX1      | 0.956191 | -0.50541 | 4.526812 | 0.000209 | 0.00212  | 0.658112 |
| RIOK1     | -0.91267 | 0.675171 | -4.52517 | 0.000209 | 0.002127 | 0.654431 |
| NT5C1A    | 1.738372 | -1.07111 | 4.56391  | 0.000216 | 0.002164 | 0.653213 |
| FAM194A   | -0.47299 | 0.226656 | -4.52431 | 0.00021  | 0.002129 | 0.652502 |
| CCNH      | -1.21058 | 0.46067  | -4.52418 | 0.00021  | 0.002129 | 0.652223 |
| MYL10     | 0.999917 | -0.80878 | 4.522741 | 0.000211 | 0.002135 | 0.649001 |
| WIP1      | -1.76754 | 0.87344  | -4.52177 | 0.000211 | 0.002138 | 0.64682  |
| UNC50     | -0.92232 | 0.322682 | -4.52171 | 0.000211 | 0.002138 | 0.646693 |
| PSMD5     | -0.9984  | 0.616251 | -4.52089 | 0.000212 | 0.00214  | 0.644849 |
| HSD17B1   | -0.62065 | 0.508871 | -4.52079 | 0.000212 | 0.00214  | 0.644637 |
| HSF4      | 0.894442 | -0.27315 | 4.520313 | 0.000212 | 0.002142 | 0.643567 |
| SRPR      | -0.90151 | 0.415608 | -4.51932 | 0.000212 | 0.002143 | 0.641343 |
| WFDC10B   | 0.848062 | -0.54911 | 4.519171 | 0.000212 | 0.002143 | 0.641013 |
| CPA3      | 1.426929 | -0.84704 | 4.519136 | 0.000212 | 0.002143 | 0.640933 |
| NIN       | -1.23509 | 0.845221 | -4.5179  | 0.000213 | 0.002147 | 0.638162 |
| REEP3     | -1.26736 | 0.888607 | -4.51787 | 0.000213 | 0.002147 | 0.638109 |
| DNAJC8    | -0.85644 | 0.674416 | -4.51737 | 0.000213 | 0.002149 | 0.636975 |
| C1QL1     | 1.277309 | -0.48732 | 4.516777 | 0.000214 | 0.002151 | 0.635655 |
| GGT3P     | -1.50176 | 0.900871 | -4.51536 | 0.000214 | 0.002156 | 0.63249  |
| HDAC8     | -0.81013 | 0.750286 | -4.51337 | 0.000215 | 0.002162 | 0.628036 |
| NCF4      | -1.68698 | 1.206351 | -4.51331 | 0.000215 | 0.002162 | 0.62789  |
| FAM182A   | 1.977352 | -0.70615 | 4.512532 | 0.000216 | 0.002164 | 0.626153 |
| PRCD      | 1.281777 | -0.42535 | 4.512156 | 0.000216 | 0.002165 | 0.625312 |
| TAAR2     | 1.429053 | -0.65312 | 4.511524 | 0.000216 | 0.002167 | 0.623897 |
| TXNDC3    | -2.08613 | 0.892069 | -4.51104 | 0.000216 | 0.002168 | 0.622823 |
| BCL6      | -2.10947 | 1.319276 | -4.50973 | 0.000217 | 0.00217  | 0.619891 |
| ZNF167    | -1.73724 | 1.113953 | -4.5096  | 0.000217 | 0.00217  | 0.619585 |
| C9orf71   | 0.952002 | -0.48069 | 4.509596 | 0.000217 | 0.00217  | 0.619582 |
| MAN2C1    | -1.36919 | 0.827046 | -4.50959 | 0.000217 | 0.00217  | 0.619576 |
| IMPDH1    | -1.72546 | 1.16263  | -4.5092  | 0.000217 | 0.002171 | 0.618692 |
| TMSB4X    | -0.89119 | 0.84027  | -4.50812 | 0.000218 | 0.002174 | 0.61628  |
| CCNYL1    | -1.24951 | 0.614982 | -4.50788 | 0.000218 | 0.002174 | 0.615738 |
| AMT       | -0.94254 | 0.643401 | -4.50768 | 0.000218 | 0.002174 | 0.6153   |
| LOC100133 | -1.43018 | 0.816027 | -4.50668 | 0.000219 | 0.002178 | 0.613049 |
| COL10A1   | 1.086034 | -0.45163 | 4.506161 | 0.000219 | 0.00218  | 0.611893 |
| CCBL2     | -0.76643 | -0.10115 | -4.50533 | 0.000219 | 0.002183 | 0.610037 |
| RAB27A    | -1.75636 | 1.123562 | -4.505   | 0.00022  | 0.002183 | 0.6093   |
| TUBGCP2   | -0.78292 | 0.5982   | -4.50479 | 0.00022  | 0.002183 | 0.608836 |
| ZBTB7B    | -0.75204 | 0.631494 | -4.50433 | 0.00022  | 0.002184 | 0.607786 |

|           |          |          |          |          |          |          |
|-----------|----------|----------|----------|----------|----------|----------|
| UBL4B     | 1.767504 | -0.70597 | 4.504136 | 0.00022  | 0.002184 | 0.60736  |
| CSDC2     | 1.170478 | -0.69965 | 4.50292  | 0.000221 | 0.002189 | 0.60464  |
| GFRA3     | 1.370752 | -0.67167 | 4.501301 | 0.000221 | 0.002196 | 0.601015 |
| CORIN     | 0.947348 | -0.57706 | 4.529781 | 0.000233 | 0.002274 | 0.599539 |
| EVI2B     | -1.81615 | 1.491826 | -4.498   | 0.000223 | 0.002212 | 0.593626 |
| UNQ6975   | -1.10625 | 0.221251 | -4.49753 | 0.000223 | 0.002214 | 0.59257  |
| MUC5B     | 1.493092 | -0.66396 | 4.49704  | 0.000224 | 0.002215 | 0.591477 |
| GGT1      | -1.46357 | 0.978938 | -4.49648 | 0.000224 | 0.002216 | 0.590234 |
| WSB2      | -1.90978 | 1.015155 | -4.49637 | 0.000224 | 0.002216 | 0.589986 |
| RPAP2     | -0.58728 | 0.077777 | -4.49482 | 0.000225 | 0.002223 | 0.586499 |
| MAD2L2    | -0.76811 | 0.329307 | -4.49432 | 0.000225 | 0.002224 | 0.585393 |
| LOC28457  | 1.099845 | -0.62881 | 4.494211 | 0.000225 | 0.002224 | 0.585144 |
| KRTAP4-12 | 1.176459 | -0.60791 | 4.493583 | 0.000225 | 0.002226 | 0.583739 |
| GGT8P     | -1.27413 | 0.321275 | -4.49294 | 0.000226 | 0.002228 | 0.582293 |
| TMOD3     | -1.27244 | 0.842499 | -4.49255 | 0.000226 | 0.002229 | 0.581418 |
| APOC4     | 1.262009 | -0.44072 | 4.573031 | 0.00024  | 0.00232  | 0.579084 |
| CCKAR     | -0.68457 | 0.163794 | -4.5297  | 0.000233 | 0.002274 | 0.578657 |
| CST3      | 1.658786 | -0.7893  | 4.491081 | 0.000227 | 0.002236 | 0.578136 |
| LOC64690  | 1.953258 | -0.64674 | 4.621114 | 0.000249 | 0.002372 | 0.577528 |
| FAM57A    | 1.193925 | -0.60184 | 4.489559 | 0.000228 | 0.002241 | 0.57473  |
| SEZ6      | 1.154596 | -0.57316 | 4.489291 | 0.000228 | 0.002241 | 0.57413  |
| ANP32A-IT | -2.00194 | 1.283379 | -4.4892  | 0.000228 | 0.002241 | 0.573928 |
| NPPB      | 1.39266  | -0.56967 | 4.489125 | 0.000228 | 0.002241 | 0.573759 |
| FLT4      | 0.889885 | -0.40431 | 4.48883  | 0.000228 | 0.002242 | 0.573097 |
| STXBP6    | 1.749587 | -0.71528 | 4.487879 | 0.000228 | 0.002245 | 0.570969 |
| SH2D5     | 1.671592 | -0.70385 | 4.487718 | 0.000228 | 0.002245 | 0.570609 |
| SOX18     | 1.336456 | -0.68684 | 4.487106 | 0.000229 | 0.002247 | 0.569238 |
| PRSS36    | -0.7873  | 0.294409 | -4.48454 | 0.00023  | 0.00226  | 0.563499 |
| PCDHGB1   | 1.177053 | -0.51529 | 4.484177 | 0.00023  | 0.00226  | 0.56268  |
| CDR2L     | 1.694454 | -0.59365 | 4.483861 | 0.000231 | 0.002261 | 0.561973 |
| BBS1      | -1.66194 | 0.849955 | -4.48327 | 0.000231 | 0.002263 | 0.560661 |
| GABRD     | 0.879153 | -0.16278 | 4.481699 | 0.000232 | 0.00227  | 0.557132 |
| ELMO3     | -1.13471 | 0.872343 | -4.48103 | 0.000232 | 0.002272 | 0.555637 |
| MAML1     | -1.00104 | 0.789466 | -4.48097 | 0.000232 | 0.002272 | 0.555505 |
| SERPINI2  | 0.675052 | -0.30925 | 4.601906 | 0.000259 | 0.002426 | 0.554592 |
| KAT5      | -0.5987  | 0.4117   | -4.48055 | 0.000232 | 0.002273 | 0.554568 |
| RIT1      | -1.47851 | 0.82468  | -4.47971 | 0.000233 | 0.002274 | 0.552669 |
| OTOA      | -0.97587 | 0.219242 | -4.51741 | 0.00024  | 0.002319 | 0.551863 |
| TSHB      | 0.730341 | -0.61354 | 4.479248 | 0.000233 | 0.002274 | 0.551645 |
| SERPINF2  | 1.081425 | -0.50354 | 4.479157 | 0.000233 | 0.002274 | 0.55144  |
| STX11     | -1.68185 | 1.167377 | -4.47816 | 0.000234 | 0.002278 | 0.549203 |
| C2orf70   | 0.785478 | -0.82333 | 4.477976 | 0.000234 | 0.002278 | 0.548797 |
| PPID      | -1.32934 | 0.825093 | -4.47771 | 0.000234 | 0.002279 | 0.548208 |
| FKBP15    | -0.93023 | 0.552878 | -4.47741 | 0.000234 | 0.002279 | 0.547519 |
| SHE       | 1.65458  | -0.41894 | 4.514645 | 0.000241 | 0.002325 | 0.545842 |
| MST1P9    | -1.80395 | 0.723947 | -4.51317 | 0.000242 | 0.002331 | 0.542618 |
| KLHL2     | -2.28096 | 1.31827  | -4.51139 | 0.000243 | 0.002334 | 0.538743 |

|           |          |          |          |          |          |          |
|-----------|----------|----------|----------|----------|----------|----------|
| GAL3ST1   | 1.142688 | -0.42362 | 4.473356 | 0.000236 | 0.002299 | 0.538451 |
| PPP2R3B   | -1.31701 | 1.034969 | -4.47263 | 0.000237 | 0.002302 | 0.536822 |
| ZNF765    | -1.47326 | 0.45952  | -4.47185 | 0.000237 | 0.002305 | 0.535082 |
| TNFAIP3   | -1.60088 | 0.693528 | -4.47174 | 0.000237 | 0.002305 | 0.534832 |
| SPI1      | -1.76772 | 1.491111 | -4.47145 | 0.000237 | 0.002305 | 0.534193 |
| PPCS      | -0.93477 | 0.157367 | -4.47093 | 0.000238 | 0.002307 | 0.53302  |
| GABRR1    | -0.68694 | 0.203112 | -4.46984 | 0.000238 | 0.002311 | 0.530576 |
| CCDC113   | 0.690311 | -0.53322 | 4.469433 | 0.000238 | 0.002312 | 0.529667 |
| SELT      | -1.37759 | 0.269394 | -4.46825 | 0.000239 | 0.002318 | 0.527011 |
| HIST1H2BE | -1.54968 | 1.234571 | -4.46795 | 0.000239 | 0.002318 | 0.526349 |
| CHADL     | 1.692554 | -0.55872 | 4.467835 | 0.000239 | 0.002318 | 0.526088 |
| B3GALT5   | -1.38517 | 0.449292 | -4.46702 | 0.00024  | 0.00232  | 0.524254 |
| MICB      | -1.28317 | 1.121355 | -4.46672 | 0.00024  | 0.00232  | 0.52359  |
| KLHDC7A   | 1.177495 | -0.65795 | 4.466363 | 0.00024  | 0.00232  | 0.522792 |
| C9orf167  | -1.46384 | 0.974619 | -4.46573 | 0.00024  | 0.002322 | 0.52138  |
| GRK6      | -0.76267 | 0.529881 | -4.4651  | 0.000241 | 0.002324 | 0.519956 |
| LIME1     | 1.114923 | -0.37993 | 4.463515 | 0.000242 | 0.002331 | 0.516414 |
| SLC17A7   | 0.782748 | -0.52287 | 4.463097 | 0.000242 | 0.002331 | 0.515478 |
| HIST1H3D  | -1.55983 | 1.399573 | -4.46279 | 0.000242 | 0.002331 | 0.514782 |
| FAM192A   | -0.98073 | 0.774723 | -4.46224 | 0.000242 | 0.002333 | 0.513552 |
| PTCH2     | 1.125578 | -0.57751 | 4.461876 | 0.000243 | 0.002334 | 0.512745 |
| NRBP2     | -1.73051 | 1.313405 | -4.46097 | 0.000243 | 0.002336 | 0.510717 |
| C19orf67  | 1.192095 | -0.57672 | 4.458504 | 0.000245 | 0.002349 | 0.505193 |
| CD80      | 1.223044 | -0.61457 | 4.458237 | 0.000245 | 0.002349 | 0.504597 |
| ARPC3     | -0.98602 | 0.552939 | -4.45802 | 0.000245 | 0.002349 | 0.504104 |
| TMPRSS9   | 3.049407 | -0.9668  | 4.457202 | 0.000245 | 0.002352 | 0.502278 |
| GPR160    | -1.72814 | 0.655191 | -4.45579 | 0.000246 | 0.002359 | 0.499109 |
| NTNG1     | 1.376395 | -0.66861 | 4.491874 | 0.000254 | 0.002405 | 0.496179 |
| FAM90A7   | -1.52442 | 0.4075   | -4.45426 | 0.000247 | 0.002366 | 0.495678 |
| ABCB1     | 1.654424 | -0.51223 | 4.453925 | 0.000247 | 0.002366 | 0.494938 |
| ATP13A1   | -0.81039 | 0.875013 | -4.45388 | 0.000247 | 0.002366 | 0.494837 |
| CLRN3     | 2.237249 | -0.7863  | 4.45316  | 0.000248 | 0.002367 | 0.493225 |
| FRMD4A    | -1.54911 | 0.461946 | -4.45308 | 0.000248 | 0.002367 | 0.493044 |
| C18orf21  | -1.03854 | 0.490385 | -4.45287 | 0.000248 | 0.002367 | 0.492585 |
| ZCCHC9    | -0.91213 | 0.337814 | -4.45278 | 0.000248 | 0.002367 | 0.492384 |
| FBN3      | 1.154555 | -0.67339 | 4.45223  | 0.000248 | 0.002369 | 0.491142 |
| TNFSF10   | -1.7398  | 1.000729 | -4.45199 | 0.000248 | 0.002369 | 0.490597 |
| LOC64419  | 1.386685 | -0.64642 | 4.478985 | 0.000261 | 0.002438 | 0.489198 |
| SULF1     | -1.09502 | 0.188328 | -4.45044 | 0.000249 | 0.002376 | 0.487134 |
| SLC4A2    | -1.40444 | 1.340894 | -4.44921 | 0.00025  | 0.002381 | 0.484379 |
| TBC1D10A  | 0.91617  | -0.51622 | 4.448928 | 0.00025  | 0.002381 | 0.483746 |
| NXPH4     | 2.070243 | -0.79248 | 4.448696 | 0.00025  | 0.002381 | 0.483227 |
| ZNF195    | -0.69215 | 0.262992 | -4.44864 | 0.00025  | 0.002381 | 0.483096 |
| WRAP73    | -0.88326 | 0.636965 | -4.44781 | 0.000251 | 0.002384 | 0.481251 |
| FAM49B    | -1.16497 | 0.582762 | -4.44759 | 0.000251 | 0.002384 | 0.480759 |
| DHRX      | -0.92979 | 0.508855 | -4.4469  | 0.000251 | 0.002387 | 0.479216 |
| CDH15     | 1.358356 | -0.93557 | 4.564517 | 0.00028  | 0.002545 | 0.478233 |



|           |          |          |          |          |          |          |
|-----------|----------|----------|----------|----------|----------|----------|
| LINC00260 | -1.68769 | 1.239126 | -4.44646 | 0.000251 | 0.002388 | 0.478211 |
| CCNL2     | -0.56622 | 0.474435 | -4.44567 | 0.000252 | 0.002392 | 0.476446 |
| LOC100501 | -0.6919  | 0.543545 | -4.44487 | 0.000252 | 0.002395 | 0.474648 |
| COX19     | -0.71724 | 0.66908  | -4.44376 | 0.000253 | 0.0024   | 0.472171 |
| LOC100133 | 1.131109 | -0.51654 | 4.469531 | 0.000267 | 0.002472 | 0.46865  |
| NRAS      | -1.54559 | 0.561442 | -4.44209 | 0.000254 | 0.002407 | 0.468442 |
| C4orf29   | -1.63459 | 0.790182 | -4.44191 | 0.000254 | 0.002407 | 0.468019 |
| NMUR1     | 1.658111 | -0.57868 | 4.441371 | 0.000254 | 0.002408 | 0.466821 |
| CADM3     | 1.464412 | -0.73444 | 4.4413   | 0.000255 | 0.002408 | 0.466661 |
| ROBO2     | 1.664222 | -1.02226 | 4.477641 | 0.000262 | 0.002442 | 0.465126 |
| C17orf80  | -1.41352 | 0.917984 | -4.43974 | 0.000255 | 0.002415 | 0.463165 |
| GATA1     | 2.300742 | -0.84485 | 4.438699 | 0.000256 | 0.00242  | 0.460836 |
| SGSM3     | -0.88598 | 0.637521 | -4.4383  | 0.000256 | 0.00242  | 0.459947 |
| NHLH1     | 1.377969 | -0.63206 | 4.438149 | 0.000256 | 0.00242  | 0.459603 |
| FXVD7     | 1.028224 | -0.54111 | 4.437926 | 0.000257 | 0.00242  | 0.459105 |
| ME2       | -1.49223 | 0.818227 | -4.43773 | 0.000257 | 0.00242  | 0.45867  |
| FBXO38    | -0.99441 | 0.569062 | -4.43767 | 0.000257 | 0.00242  | 0.45852  |
| C11orf36  | 1.011025 | -0.77115 | 4.437219 | 0.000257 | 0.002422 | 0.45752  |
| ATP5C1    | -1.72162 | 0.452671 | -4.43662 | 0.000257 | 0.002422 | 0.45617  |
| MCART2    | -1.20737 | 0.165705 | -4.43659 | 0.000257 | 0.002422 | 0.456105 |
| ABHD1     | 1.444595 | -0.69965 | 4.436582 | 0.000257 | 0.002422 | 0.456094 |
| TP53I3    | -1.79856 | 1.002042 | -4.43627 | 0.000257 | 0.002422 | 0.4554   |
| TTC29     | 0.728534 | -0.22197 | 4.436075 | 0.000258 | 0.002422 | 0.454959 |
| PDXK      | -0.69432 | 0.3539   | -4.43553 | 0.000258 | 0.002424 | 0.453734 |
| CBLN3     | 1.532868 | -0.71179 | 4.435131 | 0.000258 | 0.002425 | 0.452843 |
| NKAIN1    | 2.021529 | -0.83117 | 4.434366 | 0.000259 | 0.002426 | 0.45113  |
| TMEM234   | -0.91311 | 0.630429 | -4.43416 | 0.000259 | 0.002426 | 0.45067  |
| IL34      | 1.961812 | -0.53261 | 4.433792 | 0.000259 | 0.002426 | 0.449845 |
| SAR1B     | -1.7709  | 0.302389 | -4.43378 | 0.000259 | 0.002426 | 0.449818 |
| ACTL7A    | 1.428994 | -0.68021 | 4.433667 | 0.000259 | 0.002426 | 0.449565 |
| COQ3      | -1.02208 | 0.592373 | -4.46998 | 0.000267 | 0.002471 | 0.448411 |
| CCDC126   | -1.79287 | 0.584331 | -4.4331  | 0.000259 | 0.002427 | 0.448295 |
| CCDC17    | -1.54536 | 1.378303 | -4.43292 | 0.00026  | 0.002427 | 0.447883 |
| SPG11     | -1.35209 | 0.802683 | -4.43276 | 0.00026  | 0.002427 | 0.447522 |
| RGS3      | -1.17264 | 0.812094 | -4.43266 | 0.00026  | 0.002427 | 0.447311 |
| SLC25A11  | -0.72839 | 0.496885 | -4.43242 | 0.00026  | 0.002427 | 0.446762 |
| POU4F2    | 1.165224 | -0.6111  | 4.432399 | 0.00026  | 0.002427 | 0.446724 |
| PLA2G12B  | 1.920671 | -0.85146 | 4.45842  | 0.000274 | 0.002505 | 0.444496 |
| CRYBB3    | 1.313079 | -0.71735 | 4.430799 | 0.000261 | 0.002434 | 0.443139 |
| SMARCB1   | -0.9401  | 0.799139 | -4.42937 | 0.000262 | 0.00244  | 0.43995  |
| GALNT1    | -1.25196 | 0.084096 | -4.42895 | 0.000262 | 0.002442 | 0.438992 |
| IDH1      | -1.47714 | 0.718209 | -4.42851 | 0.000262 | 0.002442 | 0.438002 |
| SLC6A8    | 1.628674 | -0.6318  | 4.42796  | 0.000263 | 0.002444 | 0.436781 |
| LOC650293 | -1.92809 | 0.650708 | -4.46444 | 0.00027  | 0.002493 | 0.436309 |
| ENTPD6    | 1.090772 | -0.2741  | 4.427063 | 0.000263 | 0.002448 | 0.434771 |
| ICAM5     | -1.1292  | 0.432816 | -4.42588 | 0.000264 | 0.002453 | 0.432113 |
| ZNF329    | 2.206444 | -1.3106  | 4.531081 | 0.000301 | 0.002666 | 0.43114  |

|           |          |          |          |          |          |          |
|-----------|----------|----------|----------|----------|----------|----------|
| H2AFZ     | -0.87047 | 0.349669 | -4.42535 | 0.000264 | 0.002455 | 0.430945 |
| SP100     | -1.72249 | 0.76735  | -4.42475 | 0.000264 | 0.002457 | 0.4296   |
| SERPINA11 | 2.493501 | -0.69062 | 4.461347 | 0.000272 | 0.002501 | 0.429568 |
| BHMT      | 1.384697 | -1.06462 | 4.460202 | 0.000273 | 0.002501 | 0.42707  |
| LINC00461 | -1.35734 | 0.379277 | -4.42248 | 0.000266 | 0.002469 | 0.424496 |
| CDC42     | -1.02726 | 0.609946 | -4.42189 | 0.000266 | 0.002471 | 0.423173 |
| ACAN      | 1.209006 | -0.69441 | 4.421429 | 0.000267 | 0.002471 | 0.42215  |
| ANK1      | 2.261852 | -0.58078 | 4.421157 | 0.000267 | 0.002471 | 0.421542 |
| MRPS31    | -1.02931 | 0.479541 | -4.42111 | 0.000267 | 0.002471 | 0.421441 |
| LENEP     | 1.410722 | -0.71235 | 4.457508 | 0.000274 | 0.002508 | 0.421188 |
| SUPT6H    | -1.34063 | 1.291871 | -4.41996 | 0.000267 | 0.002475 | 0.418862 |
| ANXA4     | -0.57903 | 0.356369 | -4.41844 | 0.000268 | 0.002483 | 0.415459 |
| KRT14     | 1.279213 | -0.60254 | 4.417404 | 0.000269 | 0.002487 | 0.413133 |
| DCAF10    | -1.04874 | 0.849351 | -4.41738 | 0.000269 | 0.002487 | 0.413088 |
| C20orf195 | 1.345375 | -0.60674 | 4.416121 | 0.00027  | 0.002493 | 0.41026  |
| SPTLC1    | -1.35545 | 0.539459 | -4.41525 | 0.00027  | 0.002496 | 0.408316 |
| B4GALNT4  | 0.973088 | -0.44268 | 4.492184 | 0.000287 | 0.002588 | 0.407799 |
| FAM108B1  | 1.418173 | -0.32532 | 4.441027 | 0.000285 | 0.002575 | 0.406676 |
| HDAC2     | -0.70496 | 0.388298 | -4.41421 | 0.000271 | 0.002499 | 0.405989 |
| MEF2BNB-  | 0.676319 | -0.34137 | 4.414207 | 0.000271 | 0.002499 | 0.40597  |
| C11orf51  | -1.07187 | 0.551144 | -4.41398 | 0.000271 | 0.002499 | 0.405471 |
| CLCN7     | -0.81955 | 0.739848 | -4.41277 | 0.000272 | 0.002501 | 0.402743 |
| B3GNT2    | -1.85035 | 0.808891 | -4.41272 | 0.000272 | 0.002501 | 0.40264  |
| WDR20     | -1.5023  | 0.953771 | -4.4127  | 0.000272 | 0.002501 | 0.402591 |
| MERTK     | 1.660473 | -0.69424 | 4.412081 | 0.000272 | 0.002501 | 0.401209 |
| NLRC4     | -2.21425 | 1.194656 | -4.41205 | 0.000272 | 0.002501 | 0.401128 |
| FZD3      | 0.868856 | -0.24385 | 4.41183  | 0.000273 | 0.002501 | 0.400647 |
| SMYD1     | 0.970797 | -0.29722 | 4.411625 | 0.000273 | 0.002501 | 0.400187 |
| KLC3      | 1.184601 | -0.39807 | 4.41155  | 0.000273 | 0.002501 | 0.400018 |
| ATXN7L3B  | -0.82187 | 0.542001 | -4.41153 | 0.000273 | 0.002501 | 0.399969 |
| PTPN1     | -1.18664 | 0.488814 | -4.41128 | 0.000273 | 0.002501 | 0.399404 |
| C1orf38   | -1.26086 | 0.744295 | -4.41078 | 0.000273 | 0.002503 | 0.398295 |
| RIMKLB    | 1.070071 | -0.36562 | 4.410086 | 0.000274 | 0.002505 | 0.396737 |
| ATP9B     | -0.94548 | 0.604062 | -4.40938 | 0.000274 | 0.002507 | 0.395153 |
| TMC2      | 1.12525  | -0.43695 | 4.408461 | 0.000275 | 0.00251  | 0.393098 |
| ADM2      | 1.142461 | -0.62994 | 4.40745  | 0.000275 | 0.002514 | 0.390833 |
| C16orf11  | 0.920501 | -0.50033 | 4.40658  | 0.000276 | 0.002518 | 0.388884 |
| TEX12     | 1.051859 | -0.24789 | 4.406401 | 0.000276 | 0.002518 | 0.388482 |
| FCAMR     | 1.190521 | -0.60996 | 4.405947 | 0.000276 | 0.002519 | 0.387465 |
| RAB27B    | 2.168349 | -0.93497 | 4.405855 | 0.000276 | 0.002519 | 0.387259 |
| N4BP1     | -1.71525 | 1.174852 | -4.4045  | 0.000277 | 0.002525 | 0.384213 |
| LCE4A     | 1.153461 | -0.59953 | 4.404428 | 0.000277 | 0.002525 | 0.384062 |
| ZNF569    | -1.20933 | 0.294732 | -4.42949 | 0.000292 | 0.002616 | 0.381584 |
| PCP4      | 1.362075 | -0.64095 | 4.402986 | 0.000278 | 0.002532 | 0.380831 |
| AIF1      | -1.01891 | 0.662775 | -4.40251 | 0.000279 | 0.002534 | 0.379755 |
| LOC100133 | -1.41203 | 0.888354 | -4.40207 | 0.000279 | 0.002535 | 0.378769 |
| GRIN2C    | 1.309109 | -0.55338 | 4.400563 | 0.00028  | 0.002543 | 0.375403 |

|           |          |          |          |          |          |          |
|-----------|----------|----------|----------|----------|----------|----------|
| TUBA1A    | -1.20421 | 1.000865 | -4.39978 | 0.00028  | 0.002545 | 0.373645 |
| FAM43B    | 0.965731 | -0.59268 | 4.399637 | 0.00028  | 0.002545 | 0.373326 |
| LOC72931  | -0.69481 | 0.696084 | -4.3991  | 0.000281 | 0.002547 | 0.372113 |
| C1orf49   | 1.325923 | -0.4052  | 4.434224 | 0.000289 | 0.002598 | 0.370357 |
| SLC17A9   | 1.480407 | -0.5077  | 4.397504 | 0.000282 | 0.002555 | 0.368547 |
| PSKH2     | 0.945226 | -0.75103 | 4.396822 | 0.000282 | 0.002557 | 0.367019 |
| CLPX      | -0.55531 | 0.216429 | -4.39681 | 0.000282 | 0.002557 | 0.366991 |
| SLC38A2   | -1.23414 | 0.811399 | -4.39484 | 0.000284 | 0.002567 | 0.362584 |
| ATF6      | -1.1333  | 0.439001 | -4.39409 | 0.000284 | 0.002571 | 0.360901 |
| FKBP1B    | 1.764456 | -1.03032 | 4.392289 | 0.000285 | 0.002579 | 0.356862 |
| PCIF1     | -0.91373 | 0.943123 | -4.39147 | 0.000286 | 0.002583 | 0.355023 |
| ABCG2     | 1.5688   | -0.76087 | 4.390842 | 0.000286 | 0.002585 | 0.353621 |
| FAM196A   | -1.32693 | 0.30981  | -4.41623 | 0.000301 | 0.002666 | 0.352737 |
| DENND1A   | -1.23587 | 1.148644 | -4.38971 | 0.000287 | 0.00259  | 0.351088 |
| MAN2B2    | -1.01597 | 0.762681 | -4.38919 | 0.000287 | 0.002592 | 0.349924 |
| KALRN     | 1.155127 | -0.51066 | 4.388501 | 0.000288 | 0.002595 | 0.348375 |
| EFNA2     | 1.268206 | -0.53533 | 4.388085 | 0.000288 | 0.002596 | 0.347443 |
| FES       | -1.69564 | 1.198028 | -4.38785 | 0.000288 | 0.002596 | 0.346922 |
| AUH       | -0.80704 | 0.356011 | -4.38698 | 0.000289 | 0.002598 | 0.344977 |
| GLIS1     | 1.286282 | -0.62793 | 4.386503 | 0.000289 | 0.002598 | 0.343898 |
| ADRB1     | 1.054457 | -0.37427 | 4.441443 | 0.000321 | 0.002786 | 0.343851 |
| LMTK2     | -1.10838 | 0.900261 | -4.38643 | 0.000289 | 0.002598 | 0.343736 |
| FIBCD1    | 1.968328 | -0.71897 | 4.386337 | 0.000289 | 0.002598 | 0.343527 |
| CR1       | -2.70024 | 1.861939 | -4.38622 | 0.000289 | 0.002598 | 0.343261 |
| IZUMO4    | -0.70663 | 0.472662 | -4.38619 | 0.000289 | 0.002598 | 0.343206 |
| KRT13     | 1.791973 | -0.68433 | 4.385577 | 0.00029  | 0.0026   | 0.341823 |
| DKFZp761f | -1.99034 | 1.395793 | -4.38536 | 0.00029  | 0.0026   | 0.341335 |
| LOC100128 | 1.327873 | -1.4343  | 5.155711 | 0.000447 | 0.003444 | 0.339657 |
| RAD54B    | -1.13144 | 0.48322  | -4.38337 | 0.000291 | 0.00261  | 0.336876 |
| ATG5      | -1.08251 | 0.126866 | -4.38328 | 0.000291 | 0.00261  | 0.336666 |
| EPS8L2    | 0.714454 | -0.36955 | 4.383119 | 0.000291 | 0.00261  | 0.336316 |
| PLEKHO1   | 1.413193 | -0.45161 | 4.381829 | 0.000292 | 0.002616 | 0.333424 |
| LINC00174 | -1.00074 | 0.774137 | -4.38022 | 0.000293 | 0.002625 | 0.32983  |
| RORB      | 1.67003  | -0.41067 | 4.379881 | 0.000294 | 0.002625 | 0.32906  |
| NXF2      | 1.128914 | -0.8751  | 4.379705 | 0.000294 | 0.002625 | 0.328666 |
| ANKRD32   | -1.11457 | 0.333249 | -4.3791  | 0.000294 | 0.002628 | 0.327303 |
| ZFYVE21   | 0.549787 | -0.43677 | 4.37869  | 0.000294 | 0.002629 | 0.32639  |
| KIFC2     | 1.290626 | -0.36491 | 4.377781 | 0.000295 | 0.002633 | 0.324355 |
| LOC64519  | 2.177004 | -0.8072  | 4.377616 | 0.000295 | 0.002633 | 0.323983 |
| DSE       | -1.75248 | 1.160639 | -4.3771  | 0.000295 | 0.002635 | 0.322817 |
| VGF       | 1.216218 | -0.6348  | 4.376881 | 0.000296 | 0.002635 | 0.322336 |
| CHST4     | 0.843058 | -0.66048 | 4.376725 | 0.000296 | 0.002635 | 0.321987 |
| ADARB2-A  | 1.422619 | -0.67031 | 4.37656  | 0.000296 | 0.002635 | 0.321617 |
| PTGES     | 1.143915 | -0.49778 | 4.376344 | 0.000296 | 0.002635 | 0.321134 |
| USP21     | -1.0049  | 1.104407 | -4.37615 | 0.000296 | 0.002635 | 0.320705 |
| SHKBP1    | -1.42974 | 1.167882 | -4.37576 | 0.000296 | 0.002636 | 0.319823 |
| CTNNB1    | -1.55584 | 1.084284 | -4.37422 | 0.000297 | 0.002645 | 0.316384 |

|           |          |          |          |          |          |          |
|-----------|----------|----------|----------|----------|----------|----------|
| OXR1      | -1.15263 | 0.476577 | -4.37368 | 0.000298 | 0.002647 | 0.315154 |
| LOC642236 | 0.89746  | -0.51915 | 4.373411 | 0.000298 | 0.002647 | 0.314561 |
| GABRA1    | 1.676964 | -0.57265 | 4.372771 | 0.000298 | 0.00265  | 0.313127 |
| SNTG1     | -0.94213 | 0.123641 | -4.37204 | 0.000299 | 0.002653 | 0.311494 |
| ZNF408    | -1.00559 | 1.058672 | -4.37045 | 0.0003   | 0.002662 | 0.307927 |
| HMGCS2    | 0.84496  | -0.8551  | 4.404633 | 0.000309 | 0.002722 | 0.305732 |
| TPST2     | -1.20549 | 0.899067 | -4.36908 | 0.000301 | 0.002666 | 0.304851 |
| ZCCHC17   | -0.99547 | 0.812797 | -4.36893 | 0.000301 | 0.002666 | 0.304524 |
| IFNA8     | -1.23211 | 0.031552 | -4.39159 | 0.000318 | 0.00278  | 0.299116 |
| ZIM3      | 0.909942 | -0.20221 | 4.440824 | 0.000321 | 0.002789 | 0.298804 |
| MESTIT1   | 1.513085 | -0.69455 | 4.364281 | 0.000304 | 0.002694 | 0.294101 |
| EAPP      | -0.79309 | 0.355531 | -4.36305 | 0.000305 | 0.002701 | 0.291352 |
| C12orf51  | 1.357163 | -0.22983 | 4.362873 | 0.000305 | 0.002701 | 0.290946 |
| CHRM1     | 1.419522 | -0.55281 | 4.361891 | 0.000306 | 0.002706 | 0.288746 |
| B3GNT6    | 2.466899 | -0.8116  | 4.361251 | 0.000307 | 0.002708 | 0.287312 |
| POP4      | -0.79294 | 0.47299  | -4.36118 | 0.000307 | 0.002708 | 0.287143 |
| EBI3      | -2.00322 | 0.967993 | -4.36059 | 0.000307 | 0.00271  | 0.285838 |
| HMBOX1    | -0.81597 | 0.425936 | -4.35973 | 0.000308 | 0.002714 | 0.283892 |
| ABCB10    | -1.56049 | 0.402356 | -4.35942 | 0.000308 | 0.002715 | 0.283201 |
| OTOF      | 1.072812 | -0.59549 | 4.358457 | 0.000309 | 0.00272  | 0.281049 |
| CEPT1     | -1.65818 | 0.904383 | -4.3583  | 0.000309 | 0.00272  | 0.280697 |
| NPSA      | 1.671927 | -0.53266 | 4.382792 | 0.000325 | 0.002801 | 0.279976 |
| METTL9    | -1.6662  | 0.944933 | -4.35568 | 0.000311 | 0.002734 | 0.274826 |
| CELA2B    | 1.278759 | -0.62717 | 4.355484 | 0.000311 | 0.002734 | 0.274387 |
| EPG5      | -1.52521 | 1.005309 | -4.35444 | 0.000311 | 0.002738 | 0.272037 |
| RAB34     | 0.925342 | -0.48477 | 4.354389 | 0.000312 | 0.002738 | 0.271933 |
| GSTA2     | 1.122461 | -0.83272 | 4.353603 | 0.000312 | 0.002742 | 0.27017  |
| GLRX5     | 2.206454 | -1.00134 | 4.352787 | 0.000313 | 0.002746 | 0.268341 |
| SUGP2     | -0.68498 | 0.731035 | -4.35201 | 0.000313 | 0.002749 | 0.266593 |
| CPXM1     | 1.486287 | -0.94867 | 4.351917 | 0.000313 | 0.002749 | 0.266393 |
| GEMIN7    | -0.5806  | 0.509455 | -4.35177 | 0.000313 | 0.002749 | 0.266068 |
| GBAS      | -1.38024 | 0.697667 | -4.38633 | 0.000322 | 0.00279  | 0.265743 |
| SERBP1    | -0.85651 | 0.891149 | -4.35123 | 0.000314 | 0.002751 | 0.264846 |
| LOC100506 | 1.337671 | -0.55453 | 4.375653 | 0.00033  | 0.002831 | 0.264436 |
| C19orf29  | -0.90912 | 0.720281 | -4.35087 | 0.000314 | 0.002752 | 0.264041 |
| GJB3      | 1.04891  | -0.62637 | 4.350091 | 0.000315 | 0.002755 | 0.262299 |
| MMP7      | -2.05725 | 0.644436 | -4.35003 | 0.000315 | 0.002755 | 0.262174 |
| TRPM2     | -2.09639 | 1.542488 | -4.34918 | 0.000315 | 0.002759 | 0.260265 |
| RPS6KA3   | -1.05052 | 0.463294 | -4.34765 | 0.000316 | 0.002768 | 0.256823 |
| AHDC1     | 0.995195 | -0.39074 | 4.346189 | 0.000318 | 0.002775 | 0.253554 |
| TGFBI     | 2.662415 | -1.29057 | 4.346118 | 0.000318 | 0.002775 | 0.253395 |
| SGSH      | -1.09749 | 0.191341 | -4.34496 | 0.000318 | 0.00278  | 0.250798 |
| MECOM     | -0.71824 | 0.436813 | -4.34486 | 0.000318 | 0.00278  | 0.250583 |
| DGUOK     | -0.61679 | 0.520492 | -4.34413 | 0.000319 | 0.002783 | 0.248929 |
| CTNS      | -0.77192 | 0.696527 | -4.34358 | 0.000319 | 0.002785 | 0.247705 |
| LOC652276 | -0.75561 | 0.40848  | -4.34352 | 0.000319 | 0.002785 | 0.247568 |
| HEPH      | 1.200718 | -0.57267 | 4.342872 | 0.00032  | 0.002786 | 0.24612  |

|           |          |          |          |          |          |          |
|-----------|----------|----------|----------|----------|----------|----------|
| ARAF      | -1.02915 | 0.956303 | -4.34265 | 0.00032  | 0.002786 | 0.245613 |
| ZNF100    | -1.18406 | 0.443376 | -4.34255 | 0.00032  | 0.002786 | 0.245401 |
| NUDT3     | -0.81187 | 0.344516 | -4.34249 | 0.00032  | 0.002786 | 0.245254 |
| ANGPT2    | 0.691854 | -0.1951  | 4.342152 | 0.000321 | 0.002786 | 0.244508 |
| UGT3A1    | 1.021478 | -0.52439 | 4.341089 | 0.000321 | 0.00279  | 0.242126 |
| LIN7A     | -1.64303 | 1.038054 | -4.37512 | 0.000331 | 0.002833 | 0.241254 |
| EHF       | -1.03762 | 0.264477 | -4.3405  | 0.000322 | 0.00279  | 0.240808 |
| VAPA      | -1.24997 | 1.070634 | -4.34035 | 0.000322 | 0.00279  | 0.24047  |
| MAPK15    | 0.812645 | -0.41501 | 4.340091 | 0.000322 | 0.00279  | 0.239889 |
| GSTA3     | 1.152181 | -0.46725 | 4.339927 | 0.000322 | 0.00279  | 0.239519 |
| HGFAC     | 1.415735 | -0.65245 | 4.339886 | 0.000322 | 0.00279  | 0.239428 |
| BRD9      | -0.83188 | 0.646283 | -4.33985 | 0.000322 | 0.00279  | 0.239357 |
| ATP6V1D   | -1.15387 | 0.737613 | -4.33928 | 0.000323 | 0.002793 | 0.23807  |
| MMP8      | -4.74047 | 1.963461 | -4.33867 | 0.000323 | 0.002794 | 0.236707 |
| MYCN      | 1.196105 | -0.68    | 4.338626 | 0.000323 | 0.002794 | 0.236604 |
| GPBP1L1   | -0.48772 | 0.281872 | -4.33833 | 0.000323 | 0.002795 | 0.23595  |
| LOC100134 | 0.746093 | -0.47705 | 4.338201 | 0.000323 | 0.002795 | 0.235652 |
| HSPC081   | 0.929139 | -0.49783 | 4.337445 | 0.000324 | 0.002798 | 0.233958 |
| SFTPD     | 1.180594 | -0.48014 | 4.337089 | 0.000324 | 0.002799 | 0.233159 |
| CXCR4     | 1.084768 | -0.57699 | 4.336804 | 0.000325 | 0.0028   | 0.23252  |
| MANSC1    | -2.13863 | 1.750992 | -4.33606 | 0.000325 | 0.002802 | 0.230857 |
| FAM123C   | 0.876754 | -0.38315 | 4.333951 | 0.000327 | 0.002814 | 0.226126 |
| PION      | -1.27083 | 0.336313 | -4.33376 | 0.000327 | 0.002814 | 0.225694 |
| ZNF622    | -0.56551 | 0.447801 | -4.33371 | 0.000327 | 0.002814 | 0.225575 |
| TRIM41    | -0.97954 | 0.750804 | -4.33318 | 0.000327 | 0.002816 | 0.22439  |
| IST1      | -1.13198 | 0.792698 | -4.33275 | 0.000328 | 0.002818 | 0.223442 |
| CPB1      | 1.388196 | -0.68466 | 4.33219  | 0.000328 | 0.00282  | 0.22218  |
| S100A10   | 1.322692 | -0.61514 | 4.331909 | 0.000328 | 0.002821 | 0.22155  |
| UGT2B15   | 1.300308 | -0.63496 | 4.331725 | 0.000328 | 0.002821 | 0.221138 |
| UCN       | 0.663171 | -0.21097 | 4.330044 | 0.00033  | 0.002829 | 0.21737  |
| ARL6IP5   | -1.23215 | 0.416762 | -4.33002 | 0.00033  | 0.002829 | 0.217323 |
| CPSF2     | -1.25576 | 0.593108 | -4.32989 | 0.00033  | 0.002829 | 0.217033 |
| MEA1      | -0.62119 | 0.643449 | -4.32881 | 0.000331 | 0.002833 | 0.214595 |
| FAM178B   | 2.021044 | -0.80125 | 4.328509 | 0.000331 | 0.002833 | 0.213928 |
| DNASE1L2  | -0.76836 | 0.744727 | -4.32827 | 0.000331 | 0.002834 | 0.213398 |
| POR       | -1.35825 | 0.805476 | -4.32776 | 0.000331 | 0.002836 | 0.212258 |
| CCNB1IP1  | 1.076641 | -0.5979  | 4.327234 | 0.000332 | 0.002838 | 0.211071 |
| TJAP1     | -0.64275 | 0.528569 | -4.32657 | 0.000332 | 0.002841 | 0.20958  |
| CPT2      | -0.81915 | 0.476422 | -4.32598 | 0.000333 | 0.002844 | 0.208263 |
| HIST1H2BK | -1.66854 | 1.412479 | -4.32476 | 0.000334 | 0.002851 | 0.205524 |
| LOC100501 | -1.28239 | 0.672703 | -4.32373 | 0.000335 | 0.002856 | 0.203229 |
| WDR35     | -1.08022 | 0.477417 | -4.35751 | 0.000344 | 0.002917 | 0.202774 |
| NCEH1     | 0.757179 | -0.59363 | 4.323115 | 0.000335 | 0.002859 | 0.20184  |
| FGF19     | 1.195913 | -0.57684 | 4.393286 | 0.000356 | 0.002986 | 0.197808 |
| PFN1      | -0.61562 | 0.653215 | -4.32064 | 0.000337 | 0.002874 | 0.196295 |
| GMFB      | -1.26255 | 0.312572 | -4.35407 | 0.000347 | 0.002934 | 0.195249 |
| HMGB3P1   | 1.696347 | -0.43907 | 4.343829 | 0.000355 | 0.002976 | 0.195148 |

|           |          |          |          |          |          |          |
|-----------|----------|----------|----------|----------|----------|----------|
| MNS1      | -1.58275 | 0.334722 | -4.31912 | 0.000338 | 0.002883 | 0.192895 |
| NNAT      | 0.948402 | -0.54296 | 4.317275 | 0.00034  | 0.002893 | 0.18875  |
| ST3GAL4   | -2.41847 | 1.450204 | -4.31727 | 0.00034  | 0.002893 | 0.188747 |
| JPH2      | 1.347799 | -0.68174 | 4.317045 | 0.00034  | 0.002894 | 0.188234 |
| MYBL2     | -1.37676 | 1.028811 | -4.3165  | 0.00034  | 0.002896 | 0.187004 |
| THOC5     | -1.26128 | 0.821157 | -4.31575 | 0.000341 | 0.002899 | 0.185323 |
| HDGFL1    | 1.037656 | -0.86045 | 4.315633 | 0.000341 | 0.002899 | 0.18507  |
| C20orf165 | 0.777216 | -0.39266 | 4.315492 | 0.000341 | 0.002899 | 0.184753 |
| ICA1      | -1.70909 | 1.036712 | -4.31495 | 0.000341 | 0.002901 | 0.183545 |
| AP1S3     | -0.69113 | 0.375374 | -4.34858 | 0.000351 | 0.002951 | 0.183234 |
| NRF1      | -0.93397 | 0.76778  | -4.31356 | 0.000343 | 0.002909 | 0.180415 |
| ZNF257    | 1.235309 | -0.66976 | 4.313469 | 0.000343 | 0.002909 | 0.18022  |
| PRR14     | -0.87518 | 0.802231 | -4.31311 | 0.000343 | 0.00291  | 0.179404 |
| FAM105B   | -0.61678 | 0.331996 | -4.313   | 0.000343 | 0.00291  | 0.179158 |
| KIF5C     | 1.368856 | -0.33804 | 4.373268 | 0.000372 | 0.003071 | 0.175522 |
| TBCEL     | 0.987224 | -0.73957 | 4.309712 | 0.000346 | 0.002929 | 0.171799 |
| ETV3L     | 1.225026 | -0.40549 | 4.309405 | 0.000346 | 0.00293  | 0.171111 |
| C1orf123  | -0.76048 | 0.488441 | -4.30899 | 0.000346 | 0.002932 | 0.170187 |
| SRMS      | 0.969654 | -0.38899 | 4.307386 | 0.000348 | 0.002939 | 0.166585 |
| CSGALNAC  | -2.02015 | 1.293143 | -4.30701 | 0.000348 | 0.002939 | 0.165744 |
| PRPF40A   | -1.18005 | 0.746597 | -4.307   | 0.000348 | 0.002939 | 0.16571  |
| CRBN      | -1.45989 | 0.111389 | -4.30684 | 0.000348 | 0.002939 | 0.165351 |
| BZW1      | -1.37971 | 1.01604  | -4.30649 | 0.000348 | 0.002939 | 0.164575 |
| ITFG1     | -1.12238 | 0.538555 | -4.30648 | 0.000348 | 0.002939 | 0.164548 |
| CTRC      | 1.260132 | -0.48695 | 4.306428 | 0.000348 | 0.002939 | 0.164436 |
| MADCAM1   | 1.095057 | -0.43044 | 4.305588 | 0.000349 | 0.002943 | 0.162554 |
| BCAN      | 0.956713 | -0.46535 | 4.305512 | 0.000349 | 0.002943 | 0.162384 |
| POU3F3    | 0.943197 | -0.6398  | 4.30514  | 0.000349 | 0.002944 | 0.16155  |
| HAVCR2    | -1.92701 | 1.146706 | -4.30463 | 0.00035  | 0.002946 | 0.160397 |
| DICER1    | -1.56654 | 1.023085 | -4.30448 | 0.00035  | 0.002946 | 0.160068 |
| SPANXN3   | 0.850117 | -0.46403 | 4.304336 | 0.00035  | 0.002946 | 0.159748 |
| FAM190A   | 2.043097 | -0.77816 | 4.574025 | 0.000444 | 0.003433 | 0.159713 |
| PTPRA     | -0.54165 | 0.322329 | -4.30325 | 0.000351 | 0.002951 | 0.15732  |
| RAB24     | -1.25213 | 0.861198 | -4.30299 | 0.000351 | 0.002951 | 0.156732 |
| ST5       | 0.906662 | -0.46402 | 4.302676 | 0.000351 | 0.002952 | 0.156026 |
| SPDEF     | 1.280644 | -0.51054 | 4.302175 | 0.000352 | 0.002954 | 0.154905 |
| LILRB3    | -1.1292  | 0.762076 | -4.30175 | 0.000352 | 0.002956 | 0.153957 |
| TOM1      | -1.44333 | 1.224191 | -4.30148 | 0.000352 | 0.002957 | 0.153351 |
| SLC11A1   | -1.85597 | 1.386743 | -4.29754 | 0.000356 | 0.002981 | 0.144519 |
| TOP1P2    | -0.81119 | 0.167872 | -4.31913 | 0.000375 | 0.003086 | 0.141359 |
| HIST1H3F  | -1.44676 | 1.332058 | -4.29607 | 0.000357 | 0.002989 | 0.14122  |
| TPCN2     | -1.20266 | 0.798292 | -4.29572 | 0.000357 | 0.00299  | 0.140426 |
| LAT2      | -1.24562 | 0.670603 | -4.29563 | 0.000357 | 0.00299  | 0.140234 |
| FGR       | -1.88758 | 1.433614 | -4.29517 | 0.000358 | 0.002991 | 0.139203 |
| SLC4A1    | 1.566454 | -0.49718 | 4.293554 | 0.000359 | 0.003001 | 0.13558  |
| SFTPC     | 0.851116 | -0.28956 | 4.293353 | 0.000359 | 0.003001 | 0.13513  |
| DLC1      | -1.58267 | 0.290692 | -4.29332 | 0.000359 | 0.003001 | 0.135063 |

|           |          |          |          |          |          |          |
|-----------|----------|----------|----------|----------|----------|----------|
| SLC25A20  | -0.79172 | 0.436204 | -4.29307 | 0.000359 | 0.003001 | 0.134501 |
| MYOC      | -1.6848  | 0.379277 | -4.29154 | 0.000361 | 0.00301  | 0.131077 |
| OXT       | 0.949569 | -0.47712 | 4.290595 | 0.000361 | 0.003016 | 0.128948 |
| EIF2B2    | -0.54833 | 0.437315 | -4.29011 | 0.000362 | 0.003017 | 0.127868 |
| CST9      | 1.000053 | -0.62631 | 4.360277 | 0.000383 | 0.003125 | 0.127624 |
| PNLIPRP1  | 1.405995 | -0.44141 | 4.289988 | 0.000362 | 0.003017 | 0.127588 |
| ATP2C1    | -0.99256 | 0.451383 | -4.28975 | 0.000362 | 0.003018 | 0.127054 |
| RETN      | -2.30915 | 1.074864 | -4.28957 | 0.000362 | 0.003018 | 0.126658 |
| LRRC45    | 0.85429  | -0.33828 | 4.289288 | 0.000362 | 0.003019 | 0.126018 |
| OR8U1     | 0.926317 | -0.54988 | 4.288795 | 0.000363 | 0.00302  | 0.124914 |
| MFSD8     | -0.59603 | 0.098666 | -4.28861 | 0.000363 | 0.00302  | 0.124501 |
| SPATA13   | -1.54044 | 0.669912 | -4.28849 | 0.000363 | 0.00302  | 0.124237 |
| LRRC37A2  | -1.15182 | 0.717672 | -4.28829 | 0.000363 | 0.00302  | 0.123777 |
| SLC13A4   | 0.517666 | -0.42564 | 4.288135 | 0.000363 | 0.00302  | 0.123434 |
| CPN1      | 1.16414  | -0.53371 | 4.287841 | 0.000364 | 0.00302  | 0.122775 |
| FAM133B   | -1.27287 | 0.513913 | -4.28777 | 0.000364 | 0.00302  | 0.122616 |
| FGFBP2    | 2.573364 | -0.92301 | 4.28614  | 0.000365 | 0.00303  | 0.118964 |
| HERC2P4   | -1.4935  | 0.500439 | -4.28589 | 0.000365 | 0.003031 | 0.118396 |
| CCZ1      | -0.84382 | 0.200958 | -4.28577 | 0.000365 | 0.003031 | 0.118131 |
| GUCY2GP   | 1.322819 | -0.72501 | 4.285265 | 0.000366 | 0.003031 | 0.117001 |
| LOC100501 | -0.76778 | 0.553039 | -4.28519 | 0.000366 | 0.003031 | 0.11684  |
| CSF2RA    | -1.97115 | 1.144233 | -4.28511 | 0.000366 | 0.003031 | 0.11666  |
| TUBB2A    | 3.06063  | -1.5651  | 4.284147 | 0.000367 | 0.003036 | 0.114495 |
| GHRH      | 1.311966 | -0.568   | 4.284062 | 0.000367 | 0.003036 | 0.114306 |
| FABP2     | -1.36628 | 0.311115 | -4.28283 | 0.000368 | 0.003043 | 0.111552 |
| CDC40     | -1.56597 | 0.620382 | -4.28274 | 0.000368 | 0.003043 | 0.111347 |
| HEATR7B1  | 1.593826 | -0.51049 | 4.342038 | 0.000399 | 0.003205 | 0.109346 |
| OSBPL5    | 1.31537  | -0.49446 | 4.281193 | 0.000369 | 0.003052 | 0.107875 |
| CDS2      | -0.97664 | 0.475742 | -4.28112 | 0.000369 | 0.003052 | 0.107708 |
| CELF4     | 1.192236 | -0.59986 | 4.280981 | 0.00037  | 0.003052 | 0.1074   |
| SLC35E1   | -0.91063 | 0.442751 | -4.2805  | 0.00037  | 0.003054 | 0.106316 |
| ZNF429    | -1.42997 | 0.621032 | -4.2803  | 0.00037  | 0.003054 | 0.105875 |
| CRYBA2    | 1.424043 | -0.81032 | 4.311965 | 0.000381 | 0.003117 | 0.103193 |
| ABCB5     | 1.056692 | -0.55157 | 4.299193 | 0.000393 | 0.003176 | 0.097927 |
| NFATC2    | 0.518937 | -0.26106 | 4.276287 | 0.000374 | 0.00308  | 0.096878 |
| PIK3C3    | -0.72479 | 0.236701 | -4.27574 | 0.000374 | 0.003083 | 0.095659 |
| MINOS1    | -0.62421 | 0.414888 | -4.27482 | 0.000375 | 0.003086 | 0.093581 |
| TEF       | 0.852557 | -0.57639 | 4.27443  | 0.000375 | 0.003086 | 0.092716 |
| MON1B     | -0.97534 | 1.00925  | -4.2744  | 0.000375 | 0.003086 | 0.092652 |
| OR8D2     | 0.972693 | -0.71484 | 4.274146 | 0.000376 | 0.003086 | 0.092079 |
| PDHA1     | -0.70103 | 0.448778 | -4.27404 | 0.000376 | 0.003086 | 0.09183  |
| FAS       | -1.95806 | 0.536591 | -4.27401 | 0.000376 | 0.003086 | 0.091784 |
| ZNF586    | -0.8532  | 0.410685 | -4.27203 | 0.000377 | 0.003099 | 0.087342 |
| PSMA1     | -0.62362 | 0.101199 | -4.27162 | 0.000378 | 0.003101 | 0.086418 |
| LOC146880 | -0.95338 | 0.777974 | -4.27014 | 0.000379 | 0.003108 | 0.08309  |
| LOC730961 | -0.72145 | 0.040449 | -4.27005 | 0.000379 | 0.003108 | 0.082908 |
| MTMR8     | 1.164675 | -0.62991 | 4.27     | 0.000379 | 0.003108 | 0.082786 |

|           |          |          |          |          |          |          |
|-----------|----------|----------|----------|----------|----------|----------|
| TRAF7     | -0.79316 | 0.734526 | -4.26984 | 0.000379 | 0.003108 | 0.082438 |
| LOC100501 | -1.6233  | 0.368753 | -4.26967 | 0.000379 | 0.003108 | 0.082039 |
| DHX16     | -0.50649 | 0.267986 | -4.26937 | 0.00038  | 0.003109 | 0.081376 |
| C8orf42   | 1.295955 | -0.33151 | 4.269049 | 0.00038  | 0.003109 | 0.080655 |
| ARX       | 0.723579 | -0.57573 | 4.268958 | 0.00038  | 0.003109 | 0.080451 |
| SLC25A2   | -0.73599 | 0.205735 | -4.30151 | 0.000391 | 0.003167 | 0.080321 |
| GNL2      | -1.25964 | 1.050055 | -4.26743 | 0.000381 | 0.003117 | 0.07703  |
| GCLM      | -1.55666 | 0.221667 | -4.26736 | 0.000381 | 0.003117 | 0.076868 |
| DNAJC1    | -0.943   | 0.426703 | -4.26709 | 0.000382 | 0.003118 | 0.076263 |
| BTBD10    | -0.98932 | 0.315684 | -4.26655 | 0.000382 | 0.00312  | 0.07506  |
| MRGPRX2   | 1.785023 | -0.69808 | 4.265725 | 0.000383 | 0.003125 | 0.073204 |
| CYP3A5    | 0.905538 | -0.70599 | 4.265327 | 0.000383 | 0.003125 | 0.072311 |
| XRCC4     | -1.81923 | 0.523404 | -4.26425 | 0.000384 | 0.003132 | 0.069887 |
| GPIHBP1   | 1.527627 | -0.61144 | 4.263891 | 0.000385 | 0.003133 | 0.069092 |
| KCNN4     | 0.934472 | -0.36769 | 4.262736 | 0.000386 | 0.003139 | 0.066504 |
| GZMM      | 1.577972 | -0.71528 | 4.262672 | 0.000386 | 0.003139 | 0.06636  |
| HERC4     | -1.16066 | 0.496186 | -4.26259 | 0.000386 | 0.003139 | 0.066174 |
| C1orf50   | -0.676   | 0.442183 | -4.26225 | 0.000386 | 0.00314  | 0.065406 |
| RPS6KB1   | -0.93731 | 0.669371 | -4.26125 | 0.000387 | 0.003145 | 0.063175 |
| LOC100285 | -1.38707 | 0.757945 | -4.26125 | 0.000387 | 0.003145 | 0.063167 |
| STRA6     | 1.063306 | -0.49542 | 4.260445 | 0.000388 | 0.003149 | 0.061369 |
| FOXN1     | 1.164374 | -0.61123 | 4.260212 | 0.000388 | 0.00315  | 0.060847 |
| MTHFD1L   | -1.02383 | 0.719592 | -4.25922 | 0.000389 | 0.003156 | 0.05862  |
| SOHLH1    | 1.242581 | -0.75516 | 4.257906 | 0.00039  | 0.003164 | 0.055677 |
| ZFYVE26   | -0.75412 | 0.554424 | -4.25755 | 0.00039  | 0.003165 | 0.054883 |
| TTC15     | -1.25758 | 0.812414 | -4.25643 | 0.000391 | 0.003171 | 0.052376 |
| CCNI      | 0.815398 | -0.49272 | 4.255563 | 0.000392 | 0.003176 | 0.050426 |
| HMGCL     | -0.52505 | 0.244236 | -4.25527 | 0.000392 | 0.003176 | 0.049778 |
| HINT3     | -1.39029 | 0.677936 | -4.25484 | 0.000393 | 0.003176 | 0.048814 |
| CDK3      | -0.87151 | 0.85201  | -4.25479 | 0.000393 | 0.003176 | 0.048697 |
| TAF11     | -1.52434 | 0.711518 | -4.25471 | 0.000393 | 0.003176 | 0.048522 |
| SLC36A1   | 1.396557 | -0.5184  | 4.253744 | 0.000394 | 0.003182 | 0.04635  |
| LYG1      | -1.08546 | 0.830477 | -4.25268 | 0.000395 | 0.003188 | 0.043973 |
| TESC      | 1.639768 | -1.3239  | 4.252212 | 0.000395 | 0.00319  | 0.042916 |
| MS4A2     | 1.456647 | -0.77522 | 4.352036 | 0.000441 | 0.003423 | 0.042445 |
| POM121L1  | -2.18604 | 1.193014 | -4.25162 | 0.000396 | 0.003192 | 0.041585 |
| TIGIT     | 1.569678 | -0.75369 | 4.251618 | 0.000396 | 0.003192 | 0.041583 |
| CAMTA2    | -1.59021 | 1.587059 | -4.25135 | 0.000396 | 0.003192 | 0.040976 |
| C6orf126  | 1.149707 | -0.59374 | 4.251262 | 0.000396 | 0.003192 | 0.040786 |
| MRVI1-AS1 | -2.09946 | 1.481626 | -4.25055 | 0.000397 | 0.003196 | 0.039196 |
| SLC30A9   | -1.74129 | 0.616146 | -4.25014 | 0.000397 | 0.003198 | 0.038264 |
| LINC00204 | -0.97837 | 0.629851 | -4.24879 | 0.000398 | 0.003205 | 0.035241 |
| PIKFYVE   | -0.82148 | 0.138735 | -4.28054 | 0.00041  | 0.003258 | 0.034465 |
| FLJ36644  | -1.58116 | 0.850639 | -4.24837 | 0.000399 | 0.003205 | 0.034305 |
| MOG       | 1.461689 | -0.80798 | 4.505006 | 0.000506 | 0.003717 | 0.034268 |
| BPNT1     | -0.90973 | 0.371027 | -4.24835 | 0.000399 | 0.003205 | 0.034257 |
| NCR2      | 0.837655 | -0.51591 | 4.248327 | 0.000399 | 0.003205 | 0.034208 |



|           |          |          |          |          |          |          |
|-----------|----------|----------|----------|----------|----------|----------|
| POP7      | 0.705353 | -0.527   | 4.248214 | 0.000399 | 0.003205 | 0.033954 |
| SRF       | -1.38558 | 0.707726 | -4.24766 | 0.000399 | 0.003207 | 0.032713 |
| HMGB2     | -1.95314 | 0.923281 | -4.24681 | 0.0004   | 0.003211 | 0.030812 |
| RPL7L1    | -0.83419 | 0.630098 | -4.24674 | 0.0004   | 0.003211 | 0.030658 |
| RGS14     | -1.40055 | 1.415946 | -4.24671 | 0.0004   | 0.003211 | 0.030572 |
| HDC       | 2.223045 | -0.80958 | 4.245751 | 0.000401 | 0.003216 | 0.028435 |
| PRDM11    | 1.235609 | -0.49084 | 4.245516 | 0.000401 | 0.003217 | 0.027908 |
| TNF       | -0.81005 | 0.559924 | -4.24485 | 0.000402 | 0.00322  | 0.026424 |
| HCAR1     | 1.221981 | -0.53268 | 4.244749 | 0.000402 | 0.00322  | 0.026187 |
| LOC96610  | -0.80686 | 0.536453 | -4.24398 | 0.000403 | 0.003224 | 0.024464 |
| DNAJB11   | -0.81076 | 0.610361 | -4.24361 | 0.000403 | 0.003225 | 0.023627 |
| PRSS23    | 1.765969 | -0.81332 | 4.243489 | 0.000403 | 0.003225 | 0.023364 |
| FLJ36848  | 0.821295 | -0.50939 | 4.243309 | 0.000403 | 0.003225 | 0.02296  |
| SLC35F5   | -1.32643 | 0.479765 | -4.2424  | 0.000404 | 0.003231 | 0.020923 |
| LILRP2    | -1.46623 | 1.035407 | -4.24215 | 0.000405 | 0.003232 | 0.020358 |
| TMEM169   | -1.72085 | 1.148228 | -4.24154 | 0.000405 | 0.003235 | 0.018988 |
| CNGB1     | 0.698623 | -0.56415 | 4.240629 | 0.000406 | 0.00324  | 0.016954 |
| CALR3     | 0.8891   | -0.72884 | 4.240533 | 0.000406 | 0.00324  | 0.016739 |
| CLEC4E    | -2.06327 | 1.245501 | -4.24022 | 0.000406 | 0.003241 | 0.016042 |
| PGLYRP4   | -0.77535 | 0.252208 | -4.24007 | 0.000407 | 0.003241 | 0.015694 |
| ATP6V1H   | -1.09737 | 0.547902 | -4.23966 | 0.000407 | 0.003242 | 0.014787 |
| ALG8      | 0.928578 | -0.56907 | 4.239138 | 0.000407 | 0.003244 | 0.013612 |
| VAX2      | 1.352001 | -0.52884 | 4.238976 | 0.000408 | 0.003244 | 0.013248 |
| GSX1      | 1.416662 | -0.5582  | 4.238867 | 0.000408 | 0.003244 | 0.013005 |
| OR2M2     | -0.60126 | 0.05319  | -4.27035 | 0.000419 | 0.003314 | 0.012177 |
| IK        | -1.21266 | 1.36876  | -4.23839 | 0.000408 | 0.003247 | 0.011932 |
| CLDN3     | 0.838589 | -0.36561 | 4.236398 | 0.00041  | 0.003259 | 0.007471 |
| ZNF292    | -1.56826 | 0.88651  | -4.2352  | 0.000411 | 0.003267 | 0.00478  |
| LOC401351 | -1.3245  | 0.923663 | -4.23504 | 0.000411 | 0.003267 | 0.004421 |
| CYP7B1    | 1.369717 | -1.0052  | 4.234875 | 0.000411 | 0.003267 | 0.004058 |
| RERG      | 0.968579 | -0.72137 | 4.234395 | 0.000412 | 0.003269 | 0.002981 |
| RBM8A     | -0.64241 | 0.689689 | -4.2341  | 0.000412 | 0.003269 | 0.00231  |
| LRRFIP1   | -1.75689 | 1.209177 | -4.23401 | 0.000412 | 0.003269 | 0.002117 |
| KIAA1644  | 1.796649 | -0.53588 | 4.233005 | 0.000413 | 0.003276 | -0.00013 |
| RASGRF1   | -0.67999 | 0.236904 | -4.23266 | 0.000414 | 0.003277 | -0.00091 |
| LOC285074 | 0.74719  | -0.5485  | 4.231963 | 0.000414 | 0.003281 | -0.00247 |
| FHOD1     | -0.93451 | 0.456361 | -4.2305  | 0.000416 | 0.003291 | -0.00575 |
| NDUFA7    | -0.94191 | 0.62993  | -4.22849 | 0.000418 | 0.003304 | -0.01025 |
| C16orf93  | -0.62263 | 0.516207 | -4.22849 | 0.000418 | 0.003304 | -0.01025 |
| HSH2D     | 0.88501  | -0.32843 | 4.228153 | 0.000418 | 0.003305 | -0.01101 |
| GTF2E1    | -0.94989 | 0.20554  | -4.22648 | 0.00042  | 0.003315 | -0.01476 |
| ETV4      | 0.879269 | -0.50707 | 4.292971 | 0.000445 | 0.003434 | -0.01561 |
| EXOSC4    | -1.65999 | 0.784096 | -4.22576 | 0.00042  | 0.003319 | -0.01637 |
| EMR3      | 2.285445 | -0.76785 | 4.224574 | 0.000421 | 0.003326 | -0.01903 |
| UNC5A     | 1.481857 | -0.55595 | 4.224523 | 0.000422 | 0.003326 | -0.01915 |
| ZNF611    | -1.48402 | 0.909205 | -4.25576 | 0.000433 | 0.003393 | -0.01974 |
| CALCOCO1  | -0.73796 | 0.541092 | -4.22326 | 0.000423 | 0.003335 | -0.02198 |

|            |          |          |          |          |          |          |
|------------|----------|----------|----------|----------|----------|----------|
| DLG2       | 1.075665 | -0.30767 | 4.22288  | 0.000423 | 0.003336 | -0.02283 |
| TBRG1      | -1.37111 | 0.734709 | -4.22278 | 0.000423 | 0.003336 | -0.02305 |
| VPS36      | -0.92812 | 0.309505 | -4.22094 | 0.000425 | 0.003349 | -0.02718 |
| RRAGA      | -0.57734 | 0.132246 | -4.22079 | 0.000425 | 0.003349 | -0.02752 |
| BRF2       | -0.69949 | 0.498494 | -4.22058 | 0.000425 | 0.003349 | -0.02799 |
| IL17RB     | -0.94639 | 0.198888 | -4.24095 | 0.000448 | 0.003447 | -0.02899 |
| CRK        | -1.44654 | 1.074237 | -4.21979 | 0.000426 | 0.003354 | -0.02974 |
| KCTD5      | -0.49272 | 0.198442 | -4.2193  | 0.000427 | 0.003356 | -0.03085 |
| CHMP6      | 1.110805 | -0.86538 | 4.218783 | 0.000427 | 0.003359 | -0.03201 |
| GNA12      | 0.973721 | -0.52926 | 4.217188 | 0.000429 | 0.00337  | -0.03558 |
| IMPACT     | -1.23434 | 0.321693 | -4.21671 | 0.000429 | 0.003372 | -0.03667 |
| LOC10065   | 1.221251 | -1.3173  | 4.216619 | 0.000429 | 0.003372 | -0.03686 |
| FGL1       | -0.56639 | 0.103331 | -4.24704 | 0.000442 | 0.003425 | -0.03882 |
| RTN4       | -1.0904  | 0.724109 | -4.2155  | 0.00043  | 0.003379 | -0.03936 |
| ZNF717     | -1.08642 | 0.466515 | -4.23591 | 0.000453 | 0.003474 | -0.03997 |
| ALDH4A1    | -0.90193 | 0.608605 | -4.21497 | 0.000431 | 0.003381 | -0.04056 |
| DIAPH2     | -1.37198 | 0.607687 | -4.21493 | 0.000431 | 0.003381 | -0.04064 |
| CBX3       | -1.17843 | 0.353094 | -4.21408 | 0.000432 | 0.003386 | -0.04255 |
| ERG        | 1.561351 | -0.6794  | 4.213802 | 0.000432 | 0.003387 | -0.04317 |
| SKINTL     | -0.84753 | 0.30683  | -4.24485 | 0.000444 | 0.003434 | -0.04361 |
| NCKAP1L    | -1.09916 | 0.612092 | -4.21288 | 0.000433 | 0.003393 | -0.04523 |
| ATOX1      | -0.79794 | 0.6029   | -4.21259 | 0.000433 | 0.003393 | -0.04588 |
| COQ10B     | -1.69415 | 0.950599 | -4.21245 | 0.000434 | 0.003393 | -0.04619 |
| TRPC4      | 0.998246 | -0.43998 | 4.243401 | 0.000446 | 0.003439 | -0.04677 |
| TMEM188    | -1.41733 | 0.743624 | -4.21178 | 0.000434 | 0.003394 | -0.04771 |
| OR51A7     | 0.743241 | -0.38086 | 4.211641 | 0.000434 | 0.003394 | -0.04802 |
| GPSM3      | -0.8137  | 0.730459 | -4.21163 | 0.000434 | 0.003394 | -0.04803 |
| SQRDL      | -1.23352 | 0.697448 | -4.21163 | 0.000434 | 0.003394 | -0.04805 |
| CLIC5      | 1.286665 | -0.92377 | 4.210684 | 0.000435 | 0.0034   | -0.05016 |
| CNOT7      | -1.27677 | 0.91405  | -4.21049 | 0.000436 | 0.0034   | -0.05059 |
| CAPZB      | -1.06593 | 0.787343 | -4.2095  | 0.000437 | 0.003406 | -0.05282 |
| C19orf76   | 0.839687 | -0.11488 | 4.208878 | 0.000437 | 0.003409 | -0.05421 |
| C11orf54   | -1.48713 | 0.689683 | -4.20885 | 0.000437 | 0.003409 | -0.05427 |
| LOC10050   | -1.45861 | 0.790254 | -4.20871 | 0.000437 | 0.003409 | -0.05459 |
| PLL        | 1.295136 | -0.66911 | 4.20853  | 0.000438 | 0.003409 | -0.05499 |
| MOCS3      | 1.06126  | -0.29979 | 4.208124 | 0.000438 | 0.003409 | -0.0559  |
| HOXB9      | 0.915376 | -0.66998 | 4.208117 | 0.000438 | 0.003409 | -0.05591 |
| EPHB1      | 1.511104 | 0.030344 | 4.207813 | 0.000438 | 0.00341  | -0.0566  |
| SLC25A12   | -1.53202 | 0.76184  | -4.20774 | 0.000438 | 0.00341  | -0.05677 |
| NUAK1      | 1.265066 | -0.68719 | 4.207319 | 0.000439 | 0.003412 | -0.0577  |
| FGFR1OP2   | -2.2651  | 0.606746 | -4.20698 | 0.000439 | 0.003413 | -0.05846 |
| CARD17     | -2.31312 | 1.555513 | -4.20656 | 0.00044  | 0.003415 | -0.05939 |
| CDH9       | 1.01674  | -0.4645  | 4.205843 | 0.00044  | 0.003419 | -0.06101 |
| PRMT10     | -0.66273 | 0.179295 | -4.2053  | 0.000441 | 0.003422 | -0.06223 |
| CYP11B1-AS | -1.94594 | 1.021117 | -4.20468 | 0.000441 | 0.003424 | -0.06363 |
| SBF1       | -0.83668 | 0.905657 | -4.20459 | 0.000442 | 0.003424 | -0.06381 |
| ABCA8      | -1.33915 | 0.240542 | -4.25994 | 0.000478 | 0.003588 | -0.06479 |

|           |          |          |          |          |          |          |
|-----------|----------|----------|----------|----------|----------|----------|
| ELAVL2    | -1.09084 | 0.439919 | -4.20406 | 0.000442 | 0.003425 | -0.06501 |
| CSPG5     | 0.461022 | -0.21285 | 4.203505 | 0.000443 | 0.003428 | -0.06625 |
| HMMR      | -2.16337 | 0.847383 | -4.20317 | 0.000443 | 0.00343  | -0.06699 |
| FAM53B    | 0.85719  | -0.30288 | 4.202798 | 0.000443 | 0.003431 | -0.06783 |
| TMEFF2    | 1.000293 | -0.28258 | 4.202542 | 0.000444 | 0.003432 | -0.06841 |
| TNPO1     | -1.30896 | 0.636661 | -4.20172 | 0.000445 | 0.003434 | -0.07025 |
| IVNS1ABP  | -1.17761 | 0.601793 | -4.20086 | 0.000445 | 0.003439 | -0.07218 |
| CPA1      | 0.589733 | -0.13165 | 4.200554 | 0.000446 | 0.003439 | -0.07286 |
| GIPC3     | 1.178533 | -0.41652 | 4.1995   | 0.000447 | 0.003444 | -0.07523 |
| APOBEC3C  | -1.61966 | 1.751518 | -4.19934 | 0.000447 | 0.003444 | -0.07559 |
| TMEM167   | -1.27833 | 0.358848 | -4.19894 | 0.000447 | 0.003445 | -0.07648 |
| CTRL      | -0.74017 | 0.909818 | -4.19887 | 0.000447 | 0.003445 | -0.07663 |
| GRIPAP1   | -0.81062 | 0.745182 | -4.19875 | 0.000448 | 0.003445 | -0.07692 |
| C17orf53  | -0.78339 | 0.53598  | -4.19855 | 0.000448 | 0.003445 | -0.07736 |
| MAP1LC3C  | -0.61981 | 0.056053 | -4.19723 | 0.000449 | 0.003453 | -0.08031 |
| UBE2K     | -0.63506 | 0.414009 | -4.19711 | 0.000449 | 0.003453 | -0.08058 |
| LOC10065  | -1.23041 | 0.643867 | -4.19674 | 0.00045  | 0.003454 | -0.08141 |
| PSMD4     | -0.98915 | 0.750488 | -4.19654 | 0.00045  | 0.003455 | -0.08187 |
| TMPRSS6   | 0.497924 | -0.15511 | 4.195944 | 0.000451 | 0.003458 | -0.08319 |
| HIST2H3A  | 0.538299 | -0.32891 | 4.195001 | 0.000452 | 0.003464 | -0.08531 |
| EMILIN3   | 1.404417 | -0.61442 | 4.193739 | 0.000453 | 0.003473 | -0.08813 |
| RUNDC3A   | 2.458757 | -1.1199  | 4.193316 | 0.000453 | 0.003474 | -0.08908 |
| AP4B1     | -0.74057 | 0.516759 | -4.19247 | 0.000454 | 0.003478 | -0.09099 |
| RAG2      | 1.046915 | -0.33574 | 4.1924   | 0.000454 | 0.003478 | -0.09114 |
| GM2A      | -1.71128 | 1.015218 | -4.19232 | 0.000454 | 0.003478 | -0.09132 |
| C1orf114  | 1.496085 | -0.50544 | 4.191931 | 0.000455 | 0.00348  | -0.09219 |
| TTC1      | -1.22263 | 1.061905 | -4.191   | 0.000456 | 0.003484 | -0.09427 |
| HSPB9     | 0.953426 | -0.23961 | 4.190873 | 0.000456 | 0.003484 | -0.09456 |
| C1orf63   | -1.78803 | 0.768188 | -4.19083 | 0.000456 | 0.003484 | -0.09465 |
| MAG       | 1.032785 | -0.42385 | 4.188857 | 0.000458 | 0.003499 | -0.09908 |
| API5      | -1.13229 | 0.540855 | -4.18736 | 0.00046  | 0.00351  | -0.10244 |
| IGFBP3    | 1.819808 | -1.31039 | 4.326    | 0.000531 | 0.003832 | -0.1037  |
| PDE12     | -0.86349 | 0.479195 | -4.18618 | 0.000461 | 0.003518 | -0.10508 |
| P2RY4     | 1.137945 | -0.55168 | 4.185958 | 0.000461 | 0.003519 | -0.10557 |
| FNBP1     | -0.68088 | 0.336132 | -4.1851  | 0.000462 | 0.003524 | -0.10749 |
| LOC10013  | 1.321081 | -0.67949 | 4.184794 | 0.000462 | 0.003526 | -0.10818 |
| FSTL1     | 1.180844 | -0.51887 | 4.184468 | 0.000463 | 0.003526 | -0.10891 |
| TEKT5     | 1.069    | -0.40554 | 4.184244 | 0.000463 | 0.003526 | -0.10941 |
| TRIP11    | -0.73015 | 0.336059 | -4.18413 | 0.000463 | 0.003526 | -0.10967 |
| MFN1      | -0.75065 | 0.268573 | -4.18373 | 0.000464 | 0.003526 | -0.11056 |
| HIST1H2BM | -1.461   | 1.333197 | -4.18359 | 0.000464 | 0.003526 | -0.11089 |
| STOML1    | -1.16385 | 0.748031 | -4.18355 | 0.000464 | 0.003526 | -0.11096 |
| MMP28     | 0.838198 | -0.54778 | 4.183435 | 0.000464 | 0.003526 | -0.11122 |
| ROM1      | -1.48212 | 0.973673 | -4.18341 | 0.000464 | 0.003526 | -0.11129 |
| SCGB3A1   | 2.074943 | -1.54862 | 4.183217 | 0.000464 | 0.003526 | -0.11171 |
| DRAM1     | -1.86357 | 0.671587 | -4.18308 | 0.000464 | 0.003526 | -0.11202 |
| GJC3      | 1.529203 | -0.39879 | 4.18287  | 0.000464 | 0.003526 | -0.11249 |

|           |          |          |          |          |          |          |
|-----------|----------|----------|----------|----------|----------|----------|
| RANBP10   | 0.951989 | -0.39764 | 4.182679 | 0.000465 | 0.003526 | -0.11292 |
| RTP3      | -1.19972 | 0.243257 | -4.20177 | 0.00049  | 0.003645 | -0.11438 |
| NDST3     | 1.142568 | -0.47798 | 4.275843 | 0.000519 | 0.003778 | -0.11446 |
| SMCR5     | 0.938711 | -0.63662 | 4.180957 | 0.000467 | 0.003539 | -0.11678 |
| SLC18A3   | 1.31347  | -0.81291 | 4.180635 | 0.000467 | 0.003541 | -0.1175  |
| TWIST1    | 1.207882 | -0.61411 | 4.180214 | 0.000467 | 0.003543 | -0.11844 |
| EME2      | -1.42881 | 0.961999 | -4.17927 | 0.000468 | 0.003549 | -0.12056 |
| HEATR8    | 0.943263 | -0.51927 | 4.178548 | 0.000469 | 0.003554 | -0.12218 |
| MYCL1     | 1.15279  | -0.59339 | 4.178024 | 0.00047  | 0.003557 | -0.12335 |
| C21orf37  | -0.53203 | 0.15891  | -4.20836 | 0.000483 | 0.003603 | -0.12344 |
| SMC6      | -1.28861 | 0.702069 | -4.17777 | 0.00047  | 0.003557 | -0.12391 |
| ARID4A    | -1.47055 | 0.884178 | -4.1775  | 0.00047  | 0.003558 | -0.12453 |
| ADAM17    | -0.80802 | 0.719093 | -4.17654 | 0.000471 | 0.003562 | -0.12668 |
| ZFYVE16   | -1.31407 | 0.457684 | -4.17645 | 0.000471 | 0.003562 | -0.12688 |
| STX18     | -1.2118  | 0.590974 | -4.17638 | 0.000472 | 0.003562 | -0.12704 |
| ZFAND2A   | -1.34442 | 0.458066 | -4.17635 | 0.000472 | 0.003562 | -0.1271  |
| AANAT     | 0.743058 | -0.60524 | 4.176283 | 0.000472 | 0.003562 | -0.12725 |
| ADRB2     | 0.837483 | -0.44234 | 4.17558  | 0.000472 | 0.003566 | -0.12883 |
| ZNF219    | 0.747198 | -0.28509 | 4.175188 | 0.000473 | 0.003567 | -0.12971 |
| ARID5A    | -1.03956 | 0.755762 | -4.17509 | 0.000473 | 0.003567 | -0.12993 |
| PRO2012   | -1.02293 | 0.155399 | -4.1749  | 0.000473 | 0.003568 | -0.13036 |
| DGCR8     | 0.820836 | -0.25511 | 4.174618 | 0.000474 | 0.003568 | -0.13098 |
| RAB6A     | -0.96431 | 0.322865 | -4.17441 | 0.000474 | 0.003568 | -0.13146 |
| SP2       | -1.33191 | 1.212111 | -4.17435 | 0.000474 | 0.003568 | -0.13159 |
| SRSF9     | -0.50665 | 0.349574 | -4.17409 | 0.000474 | 0.003569 | -0.13217 |
| VAMP4     | -1.47742 | 0.393005 | -4.17306 | 0.000475 | 0.003576 | -0.13446 |
| GPHB5     | 0.944543 | -0.46624 | 4.172372 | 0.000476 | 0.00358  | -0.13601 |
| LOC72973  | -1.33647 | 0.902145 | -4.17222 | 0.000476 | 0.00358  | -0.13635 |
| PLSCR1    | -2.48571 | 1.341671 | -4.17181 | 0.000477 | 0.003582 | -0.13727 |
| C8orf31   | 0.905866 | -0.5586  | 4.17143  | 0.000477 | 0.003584 | -0.13812 |
| TPX2      | -1.51334 | 1.113535 | -4.17093 | 0.000478 | 0.003587 | -0.13924 |
| C3orf54   | 1.455881 | -0.30377 | 4.170633 | 0.000478 | 0.003588 | -0.13991 |
| VOPP1     | -0.78219 | 0.367048 | -4.1703  | 0.000478 | 0.003588 | -0.14066 |
| KRTAP8-1  | -0.92941 | 0.230332 | -4.16969 | 0.000479 | 0.003592 | -0.14203 |
| GPRC6A    | -0.59215 | 0.00695  | -4.16947 | 0.000479 | 0.003592 | -0.14251 |
| LOC100501 | -0.99165 | 0.971373 | -4.16934 | 0.000479 | 0.003592 | -0.14281 |
| SEMG1     | 1.720413 | -0.59045 | 4.168603 | 0.00048  | 0.003596 | -0.14446 |
| STRC      | 1.172299 | -0.38157 | 4.232408 | 0.000508 | 0.003728 | -0.14462 |
| Mar-11    | -1.35411 | 0.382402 | -4.16831 | 0.000481 | 0.003596 | -0.14513 |
| LOC400236 | -0.92888 | 0.526553 | -4.16824 | 0.000481 | 0.003596 | -0.14527 |
| SCFD2     | 1.152348 | -0.37846 | 4.168212 | 0.000481 | 0.003596 | -0.14533 |
| SAA2      | 0.530799 | -0.54098 | 4.26989  | 0.000526 | 0.003813 | -0.14569 |
| MOSPD3    | -1.42899 | 1.017052 | -4.16792 | 0.000481 | 0.003597 | -0.146   |
| RPS6KC1   | -0.91728 | 0.433983 | -4.16749 | 0.000481 | 0.003599 | -0.14696 |
| SCYL1     | -0.96456 | 0.881912 | -4.16719 | 0.000482 | 0.0036   | -0.14763 |
| C17orf62  | -0.90405 | 0.601837 | -4.16688 | 0.000482 | 0.003601 | -0.14832 |
| GNB2      | -1.12431 | 0.936193 | -4.1668  | 0.000482 | 0.003601 | -0.14849 |

|           |          |          |          |          |          |          |
|-----------|----------|----------|----------|----------|----------|----------|
| ERVV-2    | 0.897541 | -0.65116 | 4.16441  | 0.000485 | 0.003618 | -0.15385 |
| LMOD1     | 0.917716 | -0.54478 | 4.163298 | 0.000486 | 0.003625 | -0.15635 |
| JAK2      | -1.97831 | 1.036686 | -4.16319 | 0.000486 | 0.003625 | -0.15658 |
| CCDC124   | 0.747292 | -0.32046 | 4.163158 | 0.000486 | 0.003625 | -0.15666 |
| UBXN6     | 1.780894 | -0.73229 | 4.162528 | 0.000487 | 0.003629 | -0.15807 |
| HIST2H2BE | -1.874   | 1.247679 | -4.16214 | 0.000487 | 0.00363  | -0.15893 |
| TNS1      | 2.967957 | -1.02548 | 4.161279 | 0.000488 | 0.003636 | -0.16087 |
| HIST1H2BF | -1.55664 | 1.303783 | -4.16055 | 0.000489 | 0.003641 | -0.16251 |
| RAC3      | 0.949631 | -0.40753 | 4.159771 | 0.00049  | 0.003645 | -0.16425 |
| MGAT4C    | 1.020795 | -0.29334 | 4.188217 | 0.000505 | 0.003714 | -0.1675  |
| KDM1B     | -1.78497 | 1.177556 | -4.15802 | 0.000492 | 0.003658 | -0.16818 |
| BCDIN3D   | -0.80625 | 0.398179 | -4.15789 | 0.000492 | 0.003658 | -0.16846 |
| ARL6IP6   | -1.16317 | 0.557505 | -4.15745 | 0.000493 | 0.00366  | -0.16945 |
| RABEPK    | -0.61551 | 0.336404 | -4.15736 | 0.000493 | 0.00366  | -0.16965 |
| KCNK15    | 0.957206 | -0.40409 | 4.157246 | 0.000493 | 0.00366  | -0.1699  |
| C20orf201 | 1.265568 | -0.51671 | 4.15569  | 0.000495 | 0.00367  | -0.17339 |
| CNGA1     | 1.034834 | -0.39089 | 4.155656 | 0.000495 | 0.00367  | -0.17347 |
| FKRP      | -0.74508 | 0.693573 | -4.15484 | 0.000496 | 0.003676 | -0.1753  |
| CACNG6    | 2.451106 | -1.11796 | 4.154644 | 0.000496 | 0.003676 | -0.17573 |
| C15orf29  | 0.782364 | -0.51836 | 4.154419 | 0.000496 | 0.003677 | -0.17624 |
| HIST1H2BA | 1.130713 | -0.56744 | 4.17317  | 0.000523 | 0.003796 | -0.17673 |
| DEFB4A    | 1.400988 | -0.65321 | 4.153156 | 0.000498 | 0.003686 | -0.17907 |
| MCU       | -1.69068 | 1.581986 | -4.15296 | 0.000498 | 0.003687 | -0.17951 |
| FTMT      | 1.586256 | -0.49684 | 4.152459 | 0.000499 | 0.00369  | -0.18063 |
| MFAP3L    | 1.722282 | -0.51261 | 4.152122 | 0.000499 | 0.003691 | -0.18138 |
| OSTF1     | -1.16082 | 0.727615 | -4.15168 | 0.0005   | 0.003693 | -0.18238 |
| RSL1D1    | -1.1276  | 1.051607 | -4.15132 | 0.0005   | 0.003695 | -0.18318 |
| MRPL53    | -0.81564 | 0.479413 | -4.15112 | 0.0005   | 0.003695 | -0.18362 |
| CFL1      | -0.90005 | 0.64294  | -4.1508  | 0.000501 | 0.003697 | -0.18435 |
| RALGAPA2  | -1.69712 | 0.996532 | -4.15061 | 0.000501 | 0.003697 | -0.18478 |
| HNRNPH2   | -1.0816  | 0.551932 | -4.14977 | 0.000502 | 0.003701 | -0.18666 |
| HIST1H3G  | -1.31666 | 1.221087 | -4.14963 | 0.000502 | 0.003701 | -0.18697 |
| TENC1     | 1.190057 | -0.36238 | 4.212504 | 0.000531 | 0.003832 | -0.18703 |
| CACNA2D4  | -1.12673 | 0.544686 | -4.1495  | 0.000502 | 0.003701 | -0.18727 |
| PRDM12    | -0.70901 | 0.124363 | -4.14945 | 0.000502 | 0.003701 | -0.18736 |
| SLC47A2   | 0.964552 | -0.29415 | 4.212323 | 0.000531 | 0.003832 | -0.18742 |
| SIRPA     | -2.16658 | 1.507685 | -4.14935 | 0.000502 | 0.003701 | -0.1876  |
| TMEM95    | 1.332834 | -0.67923 | 4.148786 | 0.000503 | 0.003704 | -0.18886 |
| CTAGE1    | 1.045256 | -0.24035 | 4.148114 | 0.000504 | 0.003709 | -0.19036 |
| TAS2R39   | 0.969878 | -0.65484 | 4.147669 | 0.000504 | 0.003711 | -0.19136 |
| LRRC37A4  | -0.95546 | 0.657123 | -4.14755 | 0.000504 | 0.003711 | -0.19162 |
| IL1RN     | -1.49771 | 0.907462 | -4.14699 | 0.000505 | 0.003713 | -0.19289 |
| FAM110A   | 1.097369 | -0.34186 | 4.14697  | 0.000505 | 0.003713 | -0.19293 |
| ZDHHC9    | -0.92749 | 0.807567 | -4.14611 | 0.000506 | 0.003717 | -0.19486 |
| HES2      | 0.99747  | -0.64263 | 4.145833 | 0.000506 | 0.003717 | -0.19547 |
| TM4SF5    | 1.09985  | -0.48286 | 4.145046 | 0.000507 | 0.003723 | -0.19723 |
| SEMA6C    | 0.598399 | -0.27562 | 4.144913 | 0.000507 | 0.003723 | -0.19753 |

|           |          |          |          |          |          |          |
|-----------|----------|----------|----------|----------|----------|----------|
| HR        | 1.094506 | -0.42877 | 4.143883 | 0.000509 | 0.003728 | -0.19984 |
| RNF215    | 1.035682 | -0.31462 | 4.143845 | 0.000509 | 0.003728 | -0.19993 |
| C1orf194  | 0.934143 | -0.43583 | 4.143428 | 0.000509 | 0.00373  | -0.20086 |
| POTEB     | -1.70296 | 0.569901 | -4.14303 | 0.00051  | 0.003732 | -0.20176 |
| LRRC7     | 2.320973 | -0.70563 | 4.44556  | 0.000677 | 0.004488 | -0.20231 |
| FUNDC2P2  | 1.063079 | -0.93507 | 4.142323 | 0.000511 | 0.003736 | -0.20334 |
| LOC100128 | 0.902523 | -0.72569 | 4.14222  | 0.000511 | 0.003736 | -0.20357 |
| C11orf9   | 0.626695 | -0.30999 | 4.141547 | 0.000511 | 0.00374  | -0.20507 |
| ELMO2     | -1.82382 | 1.321647 | -4.14139 | 0.000512 | 0.00374  | -0.20542 |
| LOC100130 | -1.36929 | 0.908806 | -4.14128 | 0.000512 | 0.00374  | -0.20568 |
| GNS       | -1.9117  | 0.998145 | -4.14079 | 0.000512 | 0.003743 | -0.20677 |
| SCCPDH    | -0.99438 | 0.282982 | -4.13965 | 0.000514 | 0.003752 | -0.20932 |
| CRNDE     | -1.54111 | 0.384372 | -4.19163 | 0.000556 | 0.003948 | -0.20982 |
| STK33     | 1.455593 | -0.31618 | 4.157589 | 0.000542 | 0.003873 | -0.21069 |
| PSME4     | 0.818231 | -0.79164 | 4.138362 | 0.000515 | 0.003762 | -0.21221 |
| ANKLE1    | 0.801198 | -0.36797 | 4.137923 | 0.000516 | 0.003764 | -0.21319 |
| C21orf91  | -1.02338 | 0.511929 | -4.13776 | 0.000516 | 0.003764 | -0.21355 |
| PLEKHG1   | -1.89215 | 0.847692 | -4.137   | 0.000517 | 0.003769 | -0.21527 |
| ITGAX     | -1.798   | 1.365248 | -4.13606 | 0.000518 | 0.003774 | -0.21736 |
| TXNDC11   | -0.97631 | 1.020538 | -4.13591 | 0.000518 | 0.003774 | -0.21769 |
| FSIP2     | 1.349202 | -0.27917 | 4.13581  | 0.000518 | 0.003774 | -0.21793 |
| CHST2     | -1.52536 | 1.250512 | -4.13567 | 0.000519 | 0.003774 | -0.21823 |
| CYB561D1  | 1.071221 | -0.71872 | 4.135673 | 0.000519 | 0.003774 | -0.21823 |
| C16orf45  | 1.23251  | -0.92397 | 4.134684 | 0.00052  | 0.003779 | -0.22045 |
| ZNRF4     | 0.970777 | -0.36179 | 4.134481 | 0.00052  | 0.003779 | -0.2209  |
| LOC100134 | 1.054399 | -0.8457  | 4.134427 | 0.00052  | 0.003779 | -0.22102 |
| TMEM60    | -0.76971 | 0.374174 | -4.13347 | 0.000521 | 0.003786 | -0.22317 |
| SLC35A4   | -0.51906 | 0.450822 | -4.13281 | 0.000522 | 0.003791 | -0.22464 |
| OR5V1     | 0.83335  | -0.50787 | 4.131399 | 0.000524 | 0.003801 | -0.2278  |
| ATMIN     | -0.63998 | 0.262318 | -4.13087 | 0.000524 | 0.003804 | -0.22899 |
| MGC16703  | -0.58497 | 0.243314 | -4.1297  | 0.000526 | 0.003813 | -0.23162 |
| MTIF3     | -0.79726 | 0.365828 | -4.12903 | 0.000527 | 0.003816 | -0.23311 |
| CRISPLD1  | -0.90129 | 0.397629 | -4.1288  | 0.000527 | 0.003816 | -0.23363 |
| ARVP6125  | -1.13869 | 0.266415 | -4.12874 | 0.000527 | 0.003816 | -0.23375 |
| GALR3     | 0.957828 | -0.64597 | 4.128437 | 0.000527 | 0.003817 | -0.23444 |
| LINC00167 | 1.060549 | -0.44799 | 4.12814  | 0.000528 | 0.003818 | -0.23511 |
| TBC1D3F   | -1.17101 | 0.830395 | -4.12759 | 0.000528 | 0.003821 | -0.23634 |
| AP3M1     | -1.1462  | 0.655722 | -4.12748 | 0.000529 | 0.003821 | -0.23658 |
| NEUROD2   | 1.059173 | -0.38565 | 4.127137 | 0.000529 | 0.003823 | -0.23735 |
| ELL       | -1.04442 | 1.015036 | -4.12573 | 0.000531 | 0.003832 | -0.24051 |
| HINT2     | 1.020779 | -0.66347 | 4.125707 | 0.000531 | 0.003832 | -0.24055 |
| AFF4      | -1.20927 | 1.014102 | -4.12549 | 0.000531 | 0.003832 | -0.24103 |
| PSG1      | -0.95973 | 0.445514 | -4.12489 | 0.000532 | 0.003833 | -0.24239 |
| IKZF1     | -1.13974 | 1.018536 | -4.12444 | 0.000532 | 0.003836 | -0.24339 |
| NANS      | -0.86498 | 0.427186 | -4.12408 | 0.000533 | 0.003837 | -0.24419 |
| CUL3      | -1.04722 | 0.29636  | -4.1229  | 0.000534 | 0.003844 | -0.24683 |
| TMEM50A   | -0.70695 | 0.305791 | -4.12278 | 0.000534 | 0.003844 | -0.2471  |

|           |          |          |          |          |          |          |
|-----------|----------|----------|----------|----------|----------|----------|
| CSRNP2    | -0.58086 | 0.183445 | -4.12271 | 0.000534 | 0.003844 | -0.24728 |
| PXK       | -1.20496 | 1.287506 | -4.12267 | 0.000534 | 0.003844 | -0.24735 |
| BRWD1-IT1 | 1.422896 | -0.6153  | 4.122007 | 0.000535 | 0.003849 | -0.24884 |
| MB21D1    | -1.37416 | 0.823574 | -4.12168 | 0.000536 | 0.00385  | -0.24957 |
| FAM189B   | -0.5506  | 0.677406 | -4.12162 | 0.000536 | 0.00385  | -0.2497  |
| PCDHB1    | 1.048365 | -0.58059 | 4.121    | 0.000537 | 0.003853 | -0.2511  |
| ASF1B     | 0.911219 | -0.47056 | 4.120923 | 0.000537 | 0.003853 | -0.25127 |
| CD99P1    | -1.15482 | 0.444672 | -4.1208  | 0.000537 | 0.003853 | -0.25154 |
| TYK2      | -1.19582 | 1.221753 | -4.12023 | 0.000538 | 0.003857 | -0.25283 |
| H2AFX     | -0.8702  | 0.910303 | -4.11946 | 0.000538 | 0.003862 | -0.25454 |
| COP55     | -0.95428 | 0.17452  | -4.11909 | 0.000539 | 0.003863 | -0.25537 |
| FAM72D    | -1.76281 | 0.935137 | -4.119   | 0.000539 | 0.003863 | -0.25558 |
| GSX2      | -0.61921 | 0.256226 | -4.13671 | 0.000568 | 0.004004 | -0.25621 |
| PPP1R2    | -0.92109 | 0.629251 | -4.11835 | 0.00054  | 0.003868 | -0.25704 |
| TUBGCP6   | -0.6726  | 0.649113 | -4.11787 | 0.00054  | 0.00387  | -0.2581  |
| TMEM41B   | -1.10419 | 0.342834 | -4.11777 | 0.000541 | 0.00387  | -0.25833 |
| ABI1      | -0.91799 | 0.397841 | -4.11761 | 0.000541 | 0.00387  | -0.25869 |
| CHIC2     | -1.43225 | 1.024627 | -4.11732 | 0.000541 | 0.003871 | -0.25935 |
| KAT8      | -0.7153  | 0.515105 | -4.1172  | 0.000541 | 0.003871 | -0.2596  |
| DEFB129   | 0.978409 | -0.79243 | 4.116711 | 0.000542 | 0.003873 | -0.2607  |
| ZNF85     | -0.61173 | 0.030573 | -4.11509 | 0.000544 | 0.003886 | -0.26434 |
| AKIRIN2   | -1.32323 | 1.145347 | -4.11467 | 0.000545 | 0.003888 | -0.26529 |
| HDGFRP2   | -0.89537 | 0.739707 | -4.1146  | 0.000545 | 0.003888 | -0.26542 |
| ZCCHC8    | -0.51273 | 0.125622 | -4.11359 | 0.000546 | 0.003895 | -0.26769 |
| IGSF23    | 1.490299 | -0.88723 | 4.130963 | 0.000576 | 0.004033 | -0.26873 |
| CCDC8     | 1.001949 | -0.8902  | 4.113044 | 0.000547 | 0.003899 | -0.26892 |
| COTL1     | -1.25417 | 0.993432 | -4.11272 | 0.000547 | 0.0039   | -0.26964 |
| PSMC6     | -1.88841 | 0.551467 | -4.11259 | 0.000547 | 0.0039   | -0.26992 |
| EXOG      | -1.16104 | 0.77826  | -4.11109 | 0.000549 | 0.003912 | -0.27329 |
| MOB2      | 0.597069 | -0.29501 | 4.110312 | 0.00055  | 0.003918 | -0.27503 |
| TKTL1     | 1.302238 | -0.43299 | 4.11015  | 0.00055  | 0.003918 | -0.2754  |
| S100A9    | -1.83853 | 1.008109 | -4.10968 | 0.000551 | 0.003921 | -0.27646 |
| DIRAS1    | 1.1918   | -0.62578 | 4.109387 | 0.000551 | 0.003922 | -0.27711 |
| DDX4      | 1.082338 | -0.33678 | 4.126685 | 0.000581 | 0.004063 | -0.27806 |
| NGLY1     | -0.65295 | 0.165078 | -4.10796 | 0.000553 | 0.003934 | -0.2803  |
| GPR101    | 0.842232 | -0.32432 | 4.135965 | 0.000569 | 0.004008 | -0.28183 |
| CHST12    | 0.909432 | -0.21541 | 4.106924 | 0.000554 | 0.003942 | -0.28262 |
| NUDT12    | 1.016626 | -0.44288 | 4.157301 | 0.0006   | 0.004141 | -0.28274 |
| ALDH3A1   | 0.919685 | -0.27081 | 4.106754 | 0.000555 | 0.003942 | -0.283   |
| SPDYE1    | -0.88506 | 0.178832 | -4.10652 | 0.000555 | 0.003942 | -0.28353 |
| EIF4G3    | -1.30982 | 0.869059 | -4.10647 | 0.000555 | 0.003942 | -0.28364 |
| WNT10A    | 1.093515 | -0.51556 | 4.105671 | 0.000556 | 0.003948 | -0.28543 |
| ZNF643    | -0.89494 | 0.758969 | -4.13288 | 0.000573 | 0.004023 | -0.28858 |
| MYADML    | 0.830419 | -0.55354 | 4.104011 | 0.000558 | 0.00396  | -0.28914 |
| TGFBRAP1  | -0.6877  | 0.706113 | -4.10342 | 0.000559 | 0.003964 | -0.29047 |
| PRSS3     | 0.924489 | -0.46477 | 4.10324  | 0.000559 | 0.003964 | -0.29087 |
| RGS10     | 1.453994 | -0.76833 | 4.102796 | 0.00056  | 0.003967 | -0.29187 |

|           |          |          |          |          |          |          |
|-----------|----------|----------|----------|----------|----------|----------|
| ATP2B2    | 0.754912 | -0.34234 | 4.120058 | 0.00059  | 0.004104 | -0.2925  |
| ANKRD55   | -2.36868 | 1.456887 | -4.10225 | 0.000561 | 0.003971 | -0.29309 |
| GPR68     | 0.630575 | -0.46043 | 4.10204  | 0.000561 | 0.003971 | -0.29356 |
| UQCR11    | -0.58216 | 0.179588 | -4.10156 | 0.000561 | 0.003974 | -0.29464 |
| ECSCR     | -2.48286 | 0.659062 | -4.10136 | 0.000562 | 0.003974 | -0.29508 |
| DNAL4     | 1.170301 | -0.67299 | 4.101227 | 0.000562 | 0.003974 | -0.29538 |
| YTHDF3    | -1.45489 | 0.896543 | -4.10075 | 0.000562 | 0.003977 | -0.29644 |
| KIF2B     | 1.106187 | -0.3968  | 4.160759 | 0.000596 | 0.004128 | -0.29734 |
| CREB5     | -1.94447 | 1.572472 | -4.10034 | 0.000563 | 0.003979 | -0.29736 |
| CLASRP    | -1.02327 | 0.817733 | -4.10028 | 0.000563 | 0.003979 | -0.29749 |
| ERCC3     | -0.86248 | 0.492212 | -4.10013 | 0.000563 | 0.003979 | -0.29784 |
| CWH43     | -0.87332 | 0.131009 | -4.12824 | 0.000579 | 0.004054 | -0.29873 |
| TOMM40L   | -0.81863 | 0.900086 | -4.09888 | 0.000565 | 0.003989 | -0.30064 |
| PIWIL4    | -1.50587 | 0.831402 | -4.09861 | 0.000565 | 0.00399  | -0.30123 |
| SIX5      | 0.844413 | -0.50305 | 4.098416 | 0.000566 | 0.003991 | -0.30167 |
| IL4       | 1.786074 | -0.67369 | 4.115731 | 0.000596 | 0.004128 | -0.30194 |
| C20orf3   | -1.29221 | 0.8242   | -4.09793 | 0.000566 | 0.003994 | -0.30276 |
| FLJ26850  | 1.926099 | -1.31997 | 4.225923 | 0.000654 | 0.004386 | -0.30351 |
| LDB1      | 0.97409  | -0.68911 | 4.097255 | 0.000567 | 0.003998 | -0.30427 |
| TBKBP1    | 1.011077 | -0.25657 | 4.096318 | 0.000568 | 0.004004 | -0.30637 |
| SLC39A8   | -1.5991  | 0.401192 | -4.15606 | 0.000602 | 0.004147 | -0.30736 |
| ELOVL1    | -0.6883  | 0.480774 | -4.0955  | 0.000569 | 0.004009 | -0.30821 |
| KRT18P55  | -1.21952 | 0.401368 | -4.09522 | 0.00057  | 0.00401  | -0.30882 |
| PCSK2     | -1.40073 | 0.159088 | -4.11247 | 0.0006   | 0.004141 | -0.30904 |
| EFCAB2    | -2.03829 | 1.441899 | -4.09505 | 0.00057  | 0.00401  | -0.30922 |
| SPRY1     | -1.68709 | 0.565053 | -4.09437 | 0.000571 | 0.004015 | -0.31074 |
| UGT1A8    | 1.430898 | -0.4132  | 4.154245 | 0.000604 | 0.004158 | -0.31123 |
| C7orf23   | 1.047086 | -0.83307 | 4.094084 | 0.000571 | 0.004017 | -0.31137 |
| MAFF      | 1.499571 | -0.68097 | 4.093868 | 0.000572 | 0.004017 | -0.31185 |
| SLC22A14  | 1.11851  | -0.45266 | 4.093721 | 0.000572 | 0.004017 | -0.31218 |
| SYNPR     | -0.99576 | 0.174841 | -4.09341 | 0.000572 | 0.004019 | -0.31287 |
| RGS9      | 1.476389 | -0.74603 | 4.092274 | 0.000574 | 0.004026 | -0.31542 |
| METTL11A  | 0.632398 | -0.25306 | 4.092068 | 0.000574 | 0.004027 | -0.31589 |
| TAS2R16   | -0.71351 | 0.085561 | -4.0919  | 0.000574 | 0.004027 | -0.31626 |
| KIF27     | 0.772933 | -0.64146 | 4.090957 | 0.000575 | 0.004033 | -0.31837 |
| NUP43     | 0.844935 | -0.83759 | 4.08986  | 0.000577 | 0.004042 | -0.32083 |
| MED11     | -0.5676  | 0.1987   | -4.08904 | 0.000578 | 0.004048 | -0.32266 |
| CLSTN2    | 1.883383 | -1.1392  | 4.263091 | 0.000694 | 0.004552 | -0.32416 |
| LOC39070! | -0.84836 | 0.681275 | -4.08798 | 0.000579 | 0.004054 | -0.32505 |
| DNAJC7    | -0.77301 | 0.402669 | -4.08797 | 0.00058  | 0.004054 | -0.32507 |
| PRDM5     | -2.36235 | 1.219289 | -4.08738 | 0.00058  | 0.004058 | -0.32639 |
| VN1R4     | -1.37852 | -0.29799 | -4.14674 | 0.000614 | 0.004199 | -0.32725 |
| DARC      | 1.463191 | -0.51441 | 4.086422 | 0.000582 | 0.004063 | -0.32853 |
| LINC00202 | 1.308524 | -0.43595 | 4.103503 | 0.000613 | 0.00419  | -0.32859 |
| ART5      | 1.316814 | -0.51098 | 4.086374 | 0.000582 | 0.004063 | -0.32864 |
| TAS2R19   | -0.94262 | 0.229819 | -4.08538 | 0.000583 | 0.004071 | -0.33087 |
| XKR5      | 1.422264 | -0.63847 | 4.170427 | 0.000651 | 0.00437  | -0.33197 |



|          |          |          |          |          |          |          |
|----------|----------|----------|----------|----------|----------|----------|
| LOC51145 | 1.664391 | -0.45474 | 4.112816 | 0.0006   | 0.004141 | -0.33247 |
| SGK1     | 1.419395 | -0.87434 | 4.084567 | 0.000584 | 0.004077 | -0.33268 |
| C6orf64  | -0.75971 | 0.278003 | -4.08444 | 0.000584 | 0.004077 | -0.33295 |
| AASDHPPT | -0.83924 | 0.476718 | -4.08405 | 0.000585 | 0.004079 | -0.33385 |
| ZFP36L2  | 0.978509 | 0.029792 | 4.083265 | 0.000586 | 0.004085 | -0.33559 |
| TRIM29   | 1.226797 | -0.48481 | 4.082727 | 0.000587 | 0.004089 | -0.3368  |
| AFMID    | -1.28611 | 0.854602 | -4.0825  | 0.000587 | 0.00409  | -0.33731 |
| BPIFA1   | 1.499854 | -1.03734 | 4.109913 | 0.000604 | 0.004156 | -0.33883 |
| HJURP    | -1.48159 | 1.119292 | -4.08128 | 0.000589 | 0.004099 | -0.34004 |
| Mar-03   | -0.90431 | 0.58942  | -4.08127 | 0.000589 | 0.004099 | -0.34007 |
| TGS1     | -0.91874 | 0.549436 | -4.08088 | 0.000589 | 0.0041   | -0.34093 |
| MRPL44   | -1.11364 | 0.900498 | -4.0808  | 0.000589 | 0.0041   | -0.34111 |
| MARS     | -1.06094 | 0.801743 | -4.07971 | 0.000591 | 0.004107 | -0.34356 |
| MGAT4A   | -1.09589 | 0.025238 | -4.07961 | 0.000591 | 0.004107 | -0.34378 |
| CSN3     | 1.179648 | -0.25817 | 4.079321 | 0.000591 | 0.004108 | -0.34443 |
| FAF2     | -1.28021 | 1.24774  | -4.07925 | 0.000591 | 0.004108 | -0.34459 |
| LGALS3   | 1.477178 | -1.02238 | 4.07911  | 0.000592 | 0.004108 | -0.3449  |
| GPR78    | 0.901894 | -0.49722 | 4.077963 | 0.000593 | 0.004117 | -0.34746 |
| BAIAP2L2 | -1.06188 | 0.274667 | -4.07708 | 0.000594 | 0.004124 | -0.34945 |
| HSPC072  | 1.672559 | -0.56626 | 4.076795 | 0.000595 | 0.004126 | -0.35008 |
| CD58     | -1.93417 | 0.387282 | -4.07625 | 0.000596 | 0.004128 | -0.35129 |
| ADD3     | -0.76925 | 0.097812 | -4.07567 | 0.000596 | 0.004131 | -0.3526  |
| GFRA4    | 0.874807 | -0.32295 | 4.075344 | 0.000597 | 0.004132 | -0.35333 |
| PCDH15   | 0.594705 | -0.14698 | 4.075055 | 0.000597 | 0.004132 | -0.35397 |
| PLEKHA2  | -0.96169 | 0.372957 | -4.07491 | 0.000597 | 0.004132 | -0.3543  |
| SLC35B3  | -1.03991 | 0.254774 | -4.0749  | 0.000597 | 0.004132 | -0.35432 |
| FEZ1     | 1.287692 | -0.45635 | 4.090954 | 0.00063  | 0.004276 | -0.35594 |
| LOC10065 | 0.645277 | -0.43272 | 4.073878 | 0.000599 | 0.004139 | -0.35661 |
| FXD4     | 1.028397 | -0.58118 | 4.073813 | 0.000599 | 0.004139 | -0.35675 |
| MTDH     | -1.35658 | 0.569056 | -4.07373 | 0.000599 | 0.004139 | -0.35693 |
| C12orf4  | -1.08299 | 0.23272  | -4.073   | 0.0006   | 0.004141 | -0.35858 |
| KIAA0087 | -1.20974 | 0.255964 | -4.0896  | 0.000632 | 0.004284 | -0.3589  |
| KHNYN    | -0.52143 | 0.425334 | -4.07266 | 0.000601 | 0.004141 | -0.35933 |
| PYROXD1  | -1.44713 | 0.331858 | -4.0725  | 0.000601 | 0.004141 | -0.3597  |
| ARMC10   | -0.759   | 0.247566 | -4.07242 | 0.000601 | 0.004141 | -0.35987 |
| PTN      | 0.810803 | -0.18018 | 4.130635 | 0.000637 | 0.004299 | -0.36158 |
| PLA2G4D  | 0.666358 | -0.45812 | 4.071436 | 0.000602 | 0.004148 | -0.36208 |
| SLC25A48 | 1.078456 | -0.47509 | 4.088006 | 0.000635 | 0.004291 | -0.36237 |
| PABPN1   | -0.50825 | 0.408106 | -4.07117 | 0.000603 | 0.004149 | -0.36267 |
| FHL5     | 2.112967 | -0.78474 | 4.086645 | 0.000637 | 0.004299 | -0.36533 |
| C16orf53 | -0.63661 | 0.502141 | -4.06967 | 0.000605 | 0.004159 | -0.36603 |
| FBXO6    | -1.4178  | 0.913632 | -4.06856 | 0.000606 | 0.004169 | -0.3685  |
| DRD5     | -1.3741  | 0.326274 | -4.06823 | 0.000607 | 0.00417  | -0.36925 |
| GOLGA8IP | 0.615889 | -0.674   | 4.067899 | 0.000607 | 0.004172 | -0.36999 |
| FAM182B  | -1.68643 | 0.568903 | -4.06751 | 0.000608 | 0.004174 | -0.37087 |
| C21orf88 | 0.756422 | -0.69185 | 4.067099 | 0.000608 | 0.004175 | -0.37178 |
| CYP2W1   | 1.027524 | -0.60381 | 4.06708  | 0.000608 | 0.004175 | -0.37183 |

|          |          |          |          |          |          |          |
|----------|----------|----------|----------|----------|----------|----------|
| IER3     | -1.25986 | 0.567191 | -4.06702 | 0.000609 | 0.004175 | -0.37195 |
| MAPK11   | 1.193977 | -0.79586 | 4.066869 | 0.000609 | 0.004175 | -0.3723  |
| MDM4     | -0.8731  | 0.63587  | -4.06673 | 0.000609 | 0.004175 | -0.37261 |
| MGC34796 | 0.797442 | -0.67297 | 4.066135 | 0.00061  | 0.004179 | -0.37394 |
| CARD6    | -1.45906 | 0.650773 | -4.06554 | 0.000611 | 0.004182 | -0.37528 |
| HAPLN2   | 0.861287 | -0.34331 | 4.065406 | 0.000611 | 0.004182 | -0.37557 |
| C2CD3    | -0.88011 | 0.489918 | -4.06536 | 0.000611 | 0.004182 | -0.37567 |
| ZKSCAN2  | 0.797615 | -0.54367 | 4.064867 | 0.000612 | 0.004186 | -0.37678 |
| ANKZF1   | -0.75953 | 0.81615  | -4.06445 | 0.000612 | 0.004188 | -0.37772 |
| ZNF791   | -1.21726 | 0.956052 | -4.06353 | 0.000613 | 0.004194 | -0.37976 |
| LPIN3    | 1.277747 | -0.4989  | 4.062484 | 0.000615 | 0.004202 | -0.38211 |
| FFAR1    | 0.752078 | -0.62182 | 4.061795 | 0.000616 | 0.004207 | -0.38365 |
| DUSP5P   | 1.6759   | -0.45767 | 4.061485 | 0.000616 | 0.004208 | -0.38435 |
| KREMEN1  | -1.69084 | 1.4201   | -4.06095 | 0.000617 | 0.004212 | -0.38555 |
| MPHOSPH  | -1.05672 | 0.551155 | -4.05985 | 0.000619 | 0.004222 | -0.38801 |
| SEC23B   | -0.92238 | 0.496169 | -4.05913 | 0.00062  | 0.004227 | -0.38961 |
| UBE2D1   | -1.61119 | 0.811155 | -4.05867 | 0.00062  | 0.00423  | -0.39065 |
| NDUFV2   | -0.63693 | 0.06879  | -4.05825 | 0.000621 | 0.004232 | -0.3916  |
| JUNB     | -0.85565 | 0.850348 | -4.05823 | 0.000621 | 0.004232 | -0.39164 |
| A4GALT   | 1.192088 | -0.53127 | 4.116365 | 0.000657 | 0.004395 | -0.39202 |
| C16orf70 | -0.72401 | 0.307286 | -4.05787 | 0.000622 | 0.004234 | -0.39243 |
| DLEU2    | -0.91666 | 0.276698 | -4.08448 | 0.00064  | 0.004315 | -0.39447 |
| C10orf91 | 0.677083 | -0.28987 | 4.055922 | 0.000624 | 0.004251 | -0.3968  |
| TMEM8A   | -0.84693 | 0.448709 | -4.0557  | 0.000625 | 0.004252 | -0.39729 |
| F13B     | 1.504437 | -0.12285 | 4.082821 | 0.000642 | 0.004324 | -0.39809 |
| ACADL    | 1.024848 | -0.24516 | 4.055123 | 0.000626 | 0.004256 | -0.39859 |
| C8G      | 0.665297 | -0.11909 | 4.054985 | 0.000626 | 0.004256 | -0.39889 |
| UBE2J2   | -0.99036 | 0.843004 | -4.05448 | 0.000627 | 0.004259 | -0.40002 |
| C20orf24 | -1.20096 | 0.483    | -4.05438 | 0.000627 | 0.004259 | -0.40025 |
| NKD2     | 1.222576 | -0.59417 | 4.054258 | 0.000627 | 0.004259 | -0.40052 |
| S100A7   | 0.700672 | -0.13087 | 4.054059 | 0.000627 | 0.00426  | -0.40097 |
| FLJ12825 | -0.8577  | 0.462357 | -4.05377 | 0.000628 | 0.004261 | -0.40161 |
| LOC64898 | -0.87155 | 0.804098 | -4.05337 | 0.000628 | 0.004263 | -0.4025  |
| CASP9    | -0.66697 | 0.524769 | -4.05242 | 0.00063  | 0.004271 | -0.40462 |
| LAMB3    | -1.25543 | 0.690103 | -4.05141 | 0.000631 | 0.004279 | -0.4069  |
| CEP85    | -0.70247 | 0.648993 | -4.05119 | 0.000631 | 0.004279 | -0.40739 |
| ROPN1B   | 1.011397 | -0.19854 | 4.078037 | 0.000649 | 0.004359 | -0.40855 |
| HCRT     | 0.937436 | -0.54331 | 4.049716 | 0.000634 | 0.00429  | -0.41068 |
| MAP3K7   | -0.7556  | 0.310636 | -4.04968 | 0.000634 | 0.00429  | -0.41076 |
| FAR1     | -1.64288 | 0.467054 | -4.04923 | 0.000634 | 0.004291 | -0.41178 |
| C14orf21 | 0.669444 | -0.37139 | 4.049174 | 0.000634 | 0.004291 | -0.4119  |
| REXO1L1  | -1.79867 | 0.41728  | -4.04916 | 0.000634 | 0.004291 | -0.41194 |
| CALM3    | -0.78478 | 0.601244 | -4.04822 | 0.000636 | 0.004297 | -0.41402 |
| FAM151A  | 0.690232 | -0.50001 | 4.105949 | 0.000673 | 0.004469 | -0.41423 |
| GTPBP2   | -1.61179 | 1.514472 | -4.04779 | 0.000636 | 0.004299 | -0.41499 |
| KCNQ4    | 0.726369 | -0.38873 | 4.105076 | 0.000674 | 0.004476 | -0.41609 |
| CCAR1    | -1.3406  | 0.875715 | -4.04681 | 0.000638 | 0.004305 | -0.41718 |

|           |          |          |          |          |          |          |
|-----------|----------|----------|----------|----------|----------|----------|
| NUDT15    | -1.38124 | 0.564304 | -4.04565 | 0.00064  | 0.004315 | -0.41977 |
| SCGB1A1   | 0.767802 | -0.53554 | 4.045031 | 0.000641 | 0.004319 | -0.42117 |
| RIN3      | -1.08983 | 1.022451 | -4.04475 | 0.000641 | 0.00432  | -0.42179 |
| INPPL1    | -0.94065 | 0.705731 | -4.04434 | 0.000642 | 0.004323 | -0.42272 |
| UBE2G2    | -0.99224 | 0.962668 | -4.0441  | 0.000642 | 0.004324 | -0.42324 |
| CDCA5     | -1.95103 | 1.581631 | -4.0437  | 0.000643 | 0.004325 | -0.42414 |
| CBWD6     | 1.139157 | -0.25788 | 4.07066  | 0.00066  | 0.004411 | -0.42469 |
| NTN1      | 0.786981 | -0.23374 | 4.090315 | 0.000696 | 0.004558 | -0.42509 |
| SLC39A5   | 0.993409 | -0.65694 | 4.04247  | 0.000644 | 0.004336 | -0.4269  |
| TFG       | -0.7983  | 0.641562 | -4.0417  | 0.000646 | 0.004342 | -0.42861 |
| ANKS4B    | -1.25571 | 0.335692 | -4.06854 | 0.000663 | 0.004424 | -0.42932 |
| MEF2A     | -1.59605 | 0.966953 | -4.04049 | 0.000647 | 0.004353 | -0.43134 |
| C6orf89   | -0.94648 | 0.904348 | -4.04034 | 0.000648 | 0.004353 | -0.43166 |
| LOC145694 | 1.024822 | -0.5083  | 4.039612 | 0.000649 | 0.004359 | -0.43329 |
| UHRF2     | -0.99456 | 0.796279 | -4.0394  | 0.000649 | 0.004359 | -0.43376 |
| SDHD      | -0.96515 | 0.339452 | -4.03822 | 0.000651 | 0.004368 | -0.43642 |
| CRB3      | 0.940573 | -0.50394 | 4.036054 | 0.000654 | 0.004386 | -0.44125 |
| ZNF683    | 2.056641 | -0.80274 | 4.035904 | 0.000654 | 0.004386 | -0.44159 |
| MAP1LC3A  | 1.538538 | -0.54355 | 4.035675 | 0.000655 | 0.004387 | -0.4421  |
| BTN2A3P   | 0.766366 | -0.35165 | 4.035153 | 0.000655 | 0.004391 | -0.44327 |
| RIMBP2    | 0.810126 | -0.4837  | 4.034894 | 0.000656 | 0.004392 | -0.44385 |
| LINC00315 | 0.736014 | -0.48388 | 4.034647 | 0.000656 | 0.004393 | -0.4444  |
| CA4       | -1.76539 | 1.011944 | -4.03438 | 0.000657 | 0.004394 | -0.44499 |
| SMTNL2    | -1.17165 | 0.184937 | -4.03417 | 0.000657 | 0.004395 | -0.44547 |
| CCNG2     | -1.47806 | 0.782054 | -4.03324 | 0.000658 | 0.004401 | -0.44756 |
| SIGLEC9   | -1.26665 | 0.810117 | -4.03296 | 0.000659 | 0.004403 | -0.44819 |
| C12orf59  | 1.703038 | -0.48746 | 4.047458 | 0.000696 | 0.004558 | -0.45073 |
| TAL1      | 1.179314 | -0.45507 | 4.031746 | 0.000661 | 0.004412 | -0.45089 |
| FOXK1     | -0.60506 | 0.34677  | -4.03144 | 0.000661 | 0.004414 | -0.45157 |
| CD99      | 1.184252 | -0.51437 | 4.030498 | 0.000663 | 0.004422 | -0.45368 |
| ATP10B    | 1.037986 | -0.65704 | 4.030379 | 0.000663 | 0.004422 | -0.45395 |
| RASL11B   | 1.307173 | -0.53937 | 4.123875 | 0.000809 | 0.005065 | -0.4549  |
| CTF1      | 1.144928 | -0.50442 | 4.029791 | 0.000664 | 0.004424 | -0.45527 |
| DOK3      | -1.69917 | 1.213968 | -4.02971 | 0.000664 | 0.004424 | -0.45544 |
| PRAMEF2   | -1.10685 | 0.17294  | -4.05588 | 0.000683 | 0.004509 | -0.45702 |
| CSMD1     | 0.77311  | -0.54901 | 4.054537 | 0.000685 | 0.004515 | -0.45996 |
| TRIM39    | -0.83542 | 0.660591 | -4.02705 | 0.000668 | 0.004449 | -0.4614  |
| MAP3K14   | 0.863116 | -0.25826 | 4.027039 | 0.000668 | 0.004449 | -0.46142 |
| GPR149    | 0.67005  | -0.72994 | 4.053668 | 0.000686 | 0.004521 | -0.46186 |
| CALM2     | -0.92529 | 0.403108 | -4.02613 | 0.000669 | 0.004457 | -0.46347 |
| ARL16     | -1.00078 | 0.348721 | -4.02594 | 0.00067  | 0.004457 | -0.46387 |
| DPEP3     | 1.146169 | -0.44728 | 4.025808 | 0.00067  | 0.004457 | -0.46417 |
| JAM2      | -1.26959 | 0.401473 | -4.02506 | 0.000671 | 0.004463 | -0.46585 |
| GSTM2P1   | 1.711077 | -0.56765 | 4.024701 | 0.000672 | 0.004465 | -0.46665 |
| EIF4G1    | 0.702889 | -0.3672  | 4.024031 | 0.000673 | 0.004469 | -0.46815 |
| LOC100294 | 1.207791 | -0.37071 | 4.079835 | 0.000713 | 0.004639 | -0.46993 |
| MCF2L2    | 0.827659 | -0.19962 | 4.023024 | 0.000674 | 0.004477 | -0.4704  |

|           |          |          |          |          |          |          |
|-----------|----------|----------|----------|----------|----------|----------|
| TRIM53P   | -1.43105 | 0.758141 | -4.02249 | 0.000675 | 0.004481 | -0.47161 |
| ProSAPiP1 | 0.928085 | -0.64118 | 4.021507 | 0.000677 | 0.004488 | -0.47379 |
| PPP1R12C  | -0.82692 | 0.63911  | -4.02128 | 0.000677 | 0.004489 | -0.47431 |
| HTR7P1    | -0.91709 | 0.374187 | -4.02079 | 0.000678 | 0.004492 | -0.4754  |
| LAMP1     | -1.41299 | 1.021832 | -4.02057 | 0.000678 | 0.004492 | -0.47589 |
| PPWD1     | -1.0068  | 0.453121 | -4.02052 | 0.000678 | 0.004492 | -0.47601 |
| RORA      | 1.911421 | -1.53234 | 4.020314 | 0.000679 | 0.004493 | -0.47646 |
| ALDH1L2   | -1.48457 | 0.536448 | -4.01976 | 0.000679 | 0.004497 | -0.4777  |
| CMTM7     | -1.04849 | 0.952059 | -4.01961 | 0.00068  | 0.004497 | -0.47803 |
| C7orf41   | 1.199716 | -0.60074 | 4.019299 | 0.00068  | 0.004499 | -0.47873 |
| ZNF557    | -0.75128 | 0.487423 | -4.01858 | 0.000681 | 0.004504 | -0.48035 |
| DNAL1     | -0.61262 | 0.193042 | -4.01844 | 0.000681 | 0.004504 | -0.48064 |
| ITGB1BP3  | 1.433839 | -0.5195  | 4.018346 | 0.000682 | 0.004504 | -0.48087 |
| CYGB      | 1.830077 | -0.53703 | 4.018218 | 0.000682 | 0.004504 | -0.48115 |
| ZDHHC3    | -1.41523 | 0.81098  | -4.01726 | 0.000683 | 0.00451  | -0.4833  |
| CELA1     | 1.062019 | -0.87169 | 4.017166 | 0.000684 | 0.00451  | -0.48351 |
| GDAP2     | -1.10743 | 0.650333 | -4.01713 | 0.000684 | 0.00451  | -0.48358 |
| LOC100506 | 1.103016 | -0.18395 | 4.01655  | 0.000684 | 0.004514 | -0.48488 |
| DPCD      | 1.081436 | -0.37231 | 4.016061 | 0.000685 | 0.004516 | -0.48598 |
| LOC100288 | 0.99035  | -0.85674 | 4.014438 | 0.000688 | 0.00453  | -0.4896  |
| SLC25A16  | -0.7604  | 0.198742 | -4.01419 | 0.000688 | 0.004532 | -0.49015 |
| HIST1H2BF | -1.3313  | 1.15639  | -4.01368 | 0.000689 | 0.004535 | -0.4913  |
| DYNC1I2   | -0.86265 | 0.352364 | -4.01351 | 0.000689 | 0.004536 | -0.49167 |
| C1orf70   | 0.717299 | -0.60335 | 4.013056 | 0.00069  | 0.004539 | -0.4927  |
| LGI3      | 0.944709 | -0.78325 | 4.012909 | 0.00069  | 0.004539 | -0.49303 |
| SELO      | -0.68913 | 0.534615 | -4.01254 | 0.000691 | 0.004541 | -0.49385 |
| ICOSLG    | 1.83505  | -0.5512  | 4.012114 | 0.000692 | 0.004544 | -0.4948  |
| NMI       | -1.17568 | 0.465849 | -4.01205 | 0.000692 | 0.004544 | -0.49495 |
| FLJ37798  | -0.63327 | 0.050723 | -4.01111 | 0.000693 | 0.004552 | -0.49705 |
| FAM115C   | -1.06237 | 0.426397 | -4.01089 | 0.000694 | 0.004552 | -0.49753 |
| TRIM34    | -1.31413 | 1.479226 | -4.01048 | 0.000694 | 0.004554 | -0.49845 |
| VAC14     | -0.83351 | 0.905092 | -4.00989 | 0.000695 | 0.004558 | -0.49979 |
| LOC644656 | -1.00836 | 0.654314 | -4.00953 | 0.000696 | 0.004558 | -0.50058 |
| GTF2F2    | -1.2063  | 0.511086 | -4.00949 | 0.000696 | 0.004558 | -0.50066 |
| KAT7      | -0.81975 | 0.600379 | -4.00921 | 0.000696 | 0.004558 | -0.5013  |
| LINC00466 | -0.48322 | 0.014195 | -4.02396 | 0.000734 | 0.004734 | -0.50194 |
| FICD      | -0.83626 | 1.021918 | -4.00743 | 0.000699 | 0.004576 | -0.50527 |
| TTY3      | 1.307229 | -0.20783 | 4.006672 | 0.0007   | 0.004582 | -0.50697 |
| C2orf67   | -1.08428 | 0.754241 | -4.00645 | 0.000701 | 0.004582 | -0.50746 |
| GOLGA6A   | -1.28069 | 0.457208 | -4.00644 | 0.000701 | 0.004582 | -0.50749 |
| C1orf85   | 0.710298 | -0.27574 | 4.005909 | 0.000702 | 0.004586 | -0.50868 |
| TLR10     | -1.85215 | 1.219501 | -4.00492 | 0.000703 | 0.004595 | -0.5109  |
| ANAPC4    | -0.70729 | 0.13527  | -4.00432 | 0.000704 | 0.0046   | -0.51223 |
| TTC21B    | 1.087815 | -0.40746 | 4.004045 | 0.000705 | 0.004601 | -0.51285 |
| CUTA      | 1.172193 | -0.62309 | 4.003847 | 0.000705 | 0.004602 | -0.51329 |
| TNRC6C    | -0.70928 | 0.691229 | -4.00325 | 0.000706 | 0.004607 | -0.51462 |
| PDCD6     | -0.63612 | 0.218035 | -4.00308 | 0.000706 | 0.004607 | -0.51501 |

|          |          |          |          |          |          |          |
|----------|----------|----------|----------|----------|----------|----------|
| NKX2-5   | 0.891241 | -0.58904 | 4.002567 | 0.000707 | 0.004611 | -0.51615 |
| BAGE     | -1.5911  | 0.455286 | -4.0007  | 0.00071  | 0.004628 | -0.52032 |
| HLTF     | 1.020201 | -0.35807 | 4.000689 | 0.00071  | 0.004628 | -0.52035 |
| TRIM10   | 1.590839 | -0.66558 | 4.000362 | 0.000711 | 0.00463  | -0.52108 |
| ZFAT     | 0.638268 | -0.18186 | 3.999155 | 0.000713 | 0.004639 | -0.52378 |
| GNAI1    | -1.2987  | 0.321889 | -3.9991  | 0.000713 | 0.004639 | -0.52391 |
| LOC44017 | 0.868949 | -0.44011 | 3.999027 | 0.000713 | 0.004639 | -0.52407 |
| SLITRK6  | -0.91929 | 0.183445 | -3.99763 | 0.000715 | 0.004652 | -0.52718 |
| FLCN     | -1.2455  | 0.946674 | -3.99687 | 0.000717 | 0.004658 | -0.52889 |
| TIAL1    | -0.77031 | 0.29078  | -3.9968  | 0.000717 | 0.004658 | -0.52906 |
| ENTHD1   | 1.384912 | -0.58499 | 4.027674 | 0.0008   | 0.005031 | -0.52949 |
| CHUK     | -1.40065 | 0.467639 | -3.99557 | 0.000719 | 0.004669 | -0.53181 |
| LIM2     | 1.119379 | -0.46358 | 3.995485 | 0.000719 | 0.004669 | -0.53199 |
| PSEN1    | -1.38374 | 0.959353 | -3.99503 | 0.00072  | 0.004672 | -0.53301 |
| PRSS37   | 0.87491  | -0.38056 | 3.994953 | 0.00072  | 0.004672 | -0.53318 |
| SLC35A5  | -1.16883 | 0.444945 | -3.99458 | 0.00072  | 0.004673 | -0.53401 |
| DDI2     | -0.60393 | 0.192983 | -3.99446 | 0.000721 | 0.004673 | -0.53429 |
| DENND2D  | -0.97329 | 0.900603 | -3.99427 | 0.000721 | 0.004673 | -0.5347  |
| MYOG     | 1.08743  | -0.67425 | 3.994247 | 0.000721 | 0.004673 | -0.53475 |
| HSPB8    | 1.436361 | -0.49355 | 4.072146 | 0.000805 | 0.005047 | -0.53509 |
| KIAA1009 | -1.87338 | 1.098556 | -3.994   | 0.000721 | 0.004675 | -0.53531 |
| HMGCLL1  | 1.111686 | -0.61618 | 3.993812 | 0.000722 | 0.004675 | -0.53573 |
| CYP4F22  | 2.002596 | -0.55835 | 4.007476 | 0.000762 | 0.004858 | -0.53784 |
| OR4D2    | 0.966221 | -0.58064 | 3.992561 | 0.000724 | 0.004687 | -0.53852 |
| OR5AP2   | 1.099223 | -0.50924 | 3.992436 | 0.000724 | 0.004687 | -0.5388  |
| ENTPD8   | 1.773151 | -0.73934 | 4.007021 | 0.000763 | 0.00486  | -0.53883 |
| UCN3     | 0.998926 | -0.55037 | 3.991902 | 0.000725 | 0.004691 | -0.54    |
| USF2     | -1.39177 | 1.268401 | -3.99157 | 0.000726 | 0.004693 | -0.54074 |
| BDKRB1   | -0.61324 | 0.088247 | -3.99093 | 0.000727 | 0.004699 | -0.54218 |
| FABP3    | -0.9871  | 0.578515 | -3.99061 | 0.000727 | 0.004701 | -0.54289 |
| KRT6A    | 0.93372  | -0.62515 | 4.004773 | 0.000767 | 0.004877 | -0.54373 |
| ZNF326   | -0.6876  | 0.452528 | -3.99017 | 0.000728 | 0.004704 | -0.54387 |
| LIPA     | 1.213479 | -0.53059 | 3.989709 | 0.000729 | 0.004708 | -0.5449  |
| FLVCR2   | -2.54202 | 1.077046 | -3.98942 | 0.000729 | 0.004708 | -0.54554 |
| MAST1    | 1.181356 | -0.42705 | 3.989418 | 0.000729 | 0.004708 | -0.54555 |
| SH3RF3   | -1.41136 | 1.290085 | -3.98785 | 0.000732 | 0.004722 | -0.54905 |
| ATG4A    | -0.64427 | 0.185963 | -3.98772 | 0.000732 | 0.004722 | -0.54935 |
| NR2F2    | 0.83385  | -0.51378 | 3.987683 | 0.000732 | 0.004722 | -0.54943 |
| SNRK     | -1.31337 | 0.974156 | -3.98623 | 0.000735 | 0.004735 | -0.55267 |
| UGP2     | -1.04927 | 0.603295 | -4.01135 | 0.000756 | 0.004821 | -0.5544  |
| MDP1     | -0.89446 | 0.487677 | -3.98461 | 0.000737 | 0.004751 | -0.55631 |
| NRG1     | 1.385741 | -0.61317 | 3.98384  | 0.000739 | 0.004758 | -0.55802 |
| ASB12    | 0.928002 | -0.19784 | 3.983372 | 0.00074  | 0.004761 | -0.55906 |
| DMRT1    | -0.9519  | 0.2716   | -3.98331 | 0.00074  | 0.004761 | -0.55921 |
| FUK      | -0.49208 | 0.340758 | -3.98319 | 0.00074  | 0.004761 | -0.55946 |
| GLA      | -0.87922 | 0.401309 | -3.98262 | 0.000741 | 0.004762 | -0.56074 |
| TMEM39A  | -0.73267 | 0.222601 | -3.98251 | 0.000741 | 0.004762 | -0.56099 |

|           |          |          |          |          |          |          |
|-----------|----------|----------|----------|----------|----------|----------|
| A4GNT     | 0.735928 | -0.36054 | 3.982478 | 0.000741 | 0.004762 | -0.56106 |
| GZMK      | 2.645147 | -2.16871 | 3.982436 | 0.000741 | 0.004762 | -0.56116 |
| WDFY3     | -1.8999  | 0.940233 | -3.98239 | 0.000741 | 0.004762 | -0.56127 |
| GUCY1B2   | 1.275729 | -0.55291 | 3.9819   | 0.000742 | 0.004765 | -0.56235 |
| LOC728735 | 1.032192 | -0.43583 | 3.981782 | 0.000742 | 0.004765 | -0.56262 |
| ADAM10    | -1.46336 | 0.65352  | -3.98148 | 0.000743 | 0.004767 | -0.5633  |
| SCUBE1    | 0.631939 | -0.08874 | 3.995611 | 0.000783 | 0.004949 | -0.56369 |
| ATP6V1C1  | -2.18413 | 1.342952 | -3.98102 | 0.000744 | 0.004771 | -0.56432 |
| KCTD16    | 1.599376 | -0.39432 | 3.980268 | 0.000745 | 0.004778 | -0.566   |
| MYD88     | -1.95292 | 1.661325 | -3.9797  | 0.000746 | 0.004781 | -0.56726 |
| ATF1      | -1.07888 | 0.713144 | -3.97966 | 0.000746 | 0.004781 | -0.56737 |
| IRF2BPL   | 1.027404 | -0.35394 | 3.979513 | 0.000746 | 0.004781 | -0.56769 |
| XPNPEP3   | 1.10209  | -0.4733  | 3.978364 | 0.000748 | 0.004793 | -0.57026 |
| LINC00328 | -1.42287 | 0.429453 | -3.97772 | 0.000749 | 0.004798 | -0.5717  |
| HIST1H3C  | -0.86103 | 0.770963 | -3.97756 | 0.00075  | 0.004798 | -0.57206 |
| SNRPD3    | -1.08485 | 0.830731 | -3.97716 | 0.00075  | 0.004801 | -0.57295 |
| EEF1A2    | 0.718918 | -0.29733 | 3.976543 | 0.000751 | 0.004807 | -0.57433 |
| SEC61B    | -0.59184 | 0.324039 | -3.97639 | 0.000752 | 0.004807 | -0.57468 |
| KCNAB2    | -0.6325  | 0.472204 | -3.97591 | 0.000753 | 0.004811 | -0.57575 |
| GPR56     | 2.003645 | -0.52467 | 3.974987 | 0.000754 | 0.004818 | -0.5778  |
| MYBPH     | 2.13621  | -0.90887 | 3.974951 | 0.000754 | 0.004818 | -0.57789 |
| GOLGA3    | 0.829468 | -0.39122 | 3.974765 | 0.000755 | 0.004818 | -0.5783  |
| HIST1H2BL | -1.18731 | 1.014104 | -3.97473 | 0.000755 | 0.004818 | -0.57838 |
| CRLF2     | 0.983555 | -0.49409 | 3.974515 | 0.000755 | 0.004818 | -0.57886 |
| EIF5      | -1.07878 | 0.678252 | -3.9728  | 0.000758 | 0.004835 | -0.58268 |
| SERPINA6  | 0.85485  | -0.50608 | 3.972247 | 0.000759 | 0.004839 | -0.58393 |
| C9orf95   | -1.32067 | 0.669529 | -3.97098 | 0.000761 | 0.004852 | -0.58677 |
| YWHAE     | -1.2654  | 1.010622 | -3.96991 | 0.000763 | 0.00486  | -0.58916 |
| SLC6A18   | 0.864558 | -0.443   | 3.969096 | 0.000765 | 0.004866 | -0.59097 |
| SLX4      | -0.83683 | 0.751896 | -3.96897 | 0.000765 | 0.004866 | -0.59125 |
| AQP5      | 0.992669 | -0.48766 | 3.968866 | 0.000765 | 0.004866 | -0.59148 |
| ASAH1     | -1.54234 | 0.529179 | -3.96826 | 0.000766 | 0.004872 | -0.59283 |
| CDC73     | -1.19603 | 0.643883 | -3.96655 | 0.000769 | 0.004887 | -0.59665 |
| KRTAP7-1  | -0.77558 | 0.240284 | -3.96647 | 0.000769 | 0.004887 | -0.59684 |
| ACTG1     | -0.7499  | 0.612362 | -3.96609 | 0.00077  | 0.00489  | -0.59768 |
| GTF3C3    | -0.82391 | 0.253833 | -3.96523 | 0.000771 | 0.004898 | -0.5996  |
| PLBD1     | -1.79752 | 0.856696 | -3.96486 | 0.000772 | 0.004901 | -0.60044 |
| ZNF493    | -1.5194  | 1.165269 | -3.96455 | 0.000773 | 0.004903 | -0.60114 |
| GNA15     | -1.38556 | 0.959121 | -3.96397 | 0.000774 | 0.004908 | -0.60242 |
| ZYX       | -1.065   | 1.001357 | -3.96371 | 0.000774 | 0.004909 | -0.60301 |
| CAPNS2    | -1.1819  | 0.801448 | -3.98874 | 0.000796 | 0.005011 | -0.6038  |
| SARNP     | -1.54837 | 0.800462 | -3.96334 | 0.000775 | 0.004912 | -0.60383 |
| C21orf58  | 1.293925 | -0.63183 | 3.962343 | 0.000777 | 0.004922 | -0.60606 |
| LOC388387 | -1.32778 | 0.625981 | -3.96096 | 0.000779 | 0.004936 | -0.60916 |
| AMICA1    | -1.4649  | 1.086723 | -3.96081 | 0.000779 | 0.004936 | -0.60948 |
| RBMXL1    | -0.98111 | 0.612632 | -3.96053 | 0.00078  | 0.004938 | -0.6101  |
| Sep-14    | -2.07257 | 1.532236 | -3.96037 | 0.00078  | 0.004938 | -0.61047 |

|           |          |          |          |          |          |          |
|-----------|----------|----------|----------|----------|----------|----------|
| NAV2      | -0.7798  | 0.094568 | -3.96008 | 0.000781 | 0.00494  | -0.6111  |
| LACTB     | -2.2437  | 0.823482 | -3.9738  | 0.000823 | 0.005135 | -0.61119 |
| SPACA1    | 1.378883 | -0.4999  | 3.95984  | 0.000781 | 0.004941 | -0.61165 |
| CEP55     | -2.29589 | 0.919983 | -3.95954 | 0.000782 | 0.004943 | -0.61233 |
| ZNF784    | 0.795956 | -0.69502 | 3.959334 | 0.000782 | 0.004944 | -0.61278 |
| ZUFSP     | -1.22695 | 0.235118 | -3.9581  | 0.000784 | 0.004955 | -0.61554 |
| ZNF561    | -1.18099 | 0.538511 | -3.95796 | 0.000785 | 0.004955 | -0.61585 |
| CLPTM1L   | -0.49149 | 0.47722  | -3.95725 | 0.000786 | 0.004961 | -0.61743 |
| KIAA0564  | -1.13932 | 0.372051 | -3.95621 | 0.000788 | 0.004972 | -0.61975 |
| EMILIN1   | 1.264303 | -0.68663 | 3.954851 | 0.00079  | 0.004986 | -0.6228  |
| PDK1      | -1.00366 | 0.484794 | -3.95422 | 0.000792 | 0.004992 | -0.62421 |
| CTAG2     | 1.7194   | -0.38411 | 3.966651 | 0.000837 | 0.005176 | -0.62675 |
| EIF2S1    | -1.30006 | 0.867254 | -3.95251 | 0.000795 | 0.005009 | -0.62802 |
| CDC25B    | 1.275757 | -0.72806 | 3.952455 | 0.000795 | 0.005009 | -0.62815 |
| IFT27     | -0.71238 | 0.449341 | -3.95234 | 0.000795 | 0.005009 | -0.62842 |
| TREX2     | 0.976967 | -0.61322 | 3.950896 | 0.000798 | 0.005022 | -0.63163 |
| ALDH8A1   | -0.90191 | 0.631351 | -3.95028 | 0.000799 | 0.005027 | -0.63301 |
| MGC10814  | 0.857277 | -1.16448 | 3.95027  | 0.000799 | 0.005027 | -0.63303 |
| DUSP3     | -1.2309  | 0.958196 | -3.94985 | 0.0008   | 0.00503  | -0.63396 |
| POLK      | -2.71478 | 1.180996 | -3.94887 | 0.000801 | 0.005038 | -0.63616 |
| TNFAIP6   | -1.72057 | 1.087888 | -3.9485  | 0.000802 | 0.005041 | -0.63698 |
| FSCN3     | 1.058972 | -0.42783 | 3.947863 | 0.000803 | 0.005045 | -0.63841 |
| MAML3     | -2.01192 | 0.68245  | -3.94771 | 0.000804 | 0.005045 | -0.63876 |
| CSHL1     | 0.761519 | -0.33805 | 3.947703 | 0.000804 | 0.005045 | -0.63876 |
| PPP2R2C   | 0.999584 | -0.50621 | 3.947272 | 0.000804 | 0.005047 | -0.63972 |
| LIF       | 0.871741 | -0.34188 | 3.9472   | 0.000805 | 0.005047 | -0.63989 |
| PTBP2     | -1.03242 | 0.162853 | -3.94691 | 0.000805 | 0.005048 | -0.64054 |
| FCRL1     | -1.76878 | 1.26864  | -3.94597 | 0.000807 | 0.005058 | -0.64264 |
| ISCA2     | -0.87501 | 0.311864 | -3.94552 | 0.000808 | 0.005061 | -0.64364 |
| SAMD11    | 0.909265 | -0.37522 | 3.944827 | 0.000809 | 0.005065 | -0.64519 |
| LOC441666 | -2.17138 | 0.560434 | -3.9448  | 0.000809 | 0.005065 | -0.64525 |
| MMADHC    | -1.10357 | 0.324051 | -3.9443  | 0.00081  | 0.005068 | -0.64636 |
| GADD45G   | 0.898884 | -0.52621 | 3.944216 | 0.00081  | 0.005068 | -0.64655 |
| STAG1     | -0.9939  | 0.706812 | -3.96916 | 0.000832 | 0.005157 | -0.64659 |
| SOX8      | 0.944537 | -0.52921 | 3.944147 | 0.00081  | 0.005068 | -0.64671 |
| CYP2A7    | 0.892542 | -0.31031 | 3.996801 | 0.000857 | 0.005269 | -0.64704 |
| WDR70     | -0.80397 | 0.406929 | -3.94386 | 0.000811 | 0.00507  | -0.64734 |
| KIAA1609  | -1.01401 | 0.641213 | -3.94327 | 0.000812 | 0.005074 | -0.64867 |
| COQ7      | -0.74838 | 0.535627 | -3.94323 | 0.000812 | 0.005074 | -0.64875 |
| GPR137    | -0.96926 | 0.86942  | -3.94056 | 0.000817 | 0.005104 | -0.65472 |
| ZXDC      | -0.8356  | 0.548591 | -3.93903 | 0.00082  | 0.005119 | -0.65813 |
| RASD2     | 1.031226 | -0.39478 | 3.938908 | 0.00082  | 0.005119 | -0.65841 |
| C1orf158  | 0.794618 | -0.51401 | 3.938899 | 0.00082  | 0.005119 | -0.65843 |
| LOC100501 | -1.20506 | 0.159075 | -3.96339 | 0.000843 | 0.005206 | -0.6592  |
| GNLY      | 2.467096 | -1.22555 | 3.937048 | 0.000824 | 0.005138 | -0.66256 |
| C6orf192  | 0.784492 | -0.68404 | 3.936827 | 0.000824 | 0.005139 | -0.66305 |
| CCL21     | 1.086135 | -0.50666 | 3.936527 | 0.000825 | 0.005141 | -0.66372 |

|           |          |          |          |          |          |          |
|-----------|----------|----------|----------|----------|----------|----------|
| CHRM4     | 0.866706 | -0.44461 | 3.936062 | 0.000826 | 0.005145 | -0.66476 |
| CWF19L1   | -0.80038 | 0.204268 | -3.93566 | 0.000827 | 0.005146 | -0.66565 |
| ALPI      | 1.092085 | -0.49025 | 3.93564  | 0.000827 | 0.005146 | -0.6657  |
| LOC646626 | 1.333281 | -0.78524 | 3.934808 | 0.000828 | 0.005152 | -0.66756 |
| UFD1L     | -1.01215 | 0.659124 | -3.93461 | 0.000829 | 0.005152 | -0.66799 |
| STYXL1    | -1.0562  | 0.862161 | -3.93457 | 0.000829 | 0.005152 | -0.66808 |
| PPA2      | 0.848407 | -0.19066 | 3.934445 | 0.000829 | 0.005152 | -0.66837 |
| ABCD1     | -0.88951 | 0.68831  | -3.93429 | 0.000829 | 0.005152 | -0.66871 |
| ANKRD44   | -0.79109 | 0.495852 | -3.9342  | 0.000829 | 0.005152 | -0.66892 |
| NBN       | -1.67247 | 0.921242 | -3.93418 | 0.000829 | 0.005152 | -0.66895 |
| CX3CR1    | 1.575013 | -0.62522 | 3.93407  | 0.00083  | 0.005152 | -0.66921 |
| U2SURP    | -0.65234 | 0.494371 | -3.93396 | 0.00083  | 0.005152 | -0.66945 |
| QARS      | -0.88303 | 0.793811 | -3.93346 | 0.000831 | 0.005155 | -0.67056 |
| IQCE      | -1.08209 | 0.638388 | -3.93343 | 0.000831 | 0.005155 | -0.67063 |
| KIAA1704  | -1.1869  | 0.624974 | -3.93297 | 0.000832 | 0.005157 | -0.67167 |
| DERA      | -0.58063 | 0.210335 | -3.93272 | 0.000832 | 0.005157 | -0.67222 |
| TMEM71    | -1.07237 | 0.364369 | -3.93269 | 0.000832 | 0.005157 | -0.67229 |
| PLEK2     | 2.653777 | -1.17437 | 3.932276 | 0.000833 | 0.005161 | -0.67321 |
| IL28B     | 1.314669 | -0.2104  | 3.932064 | 0.000833 | 0.005162 | -0.67369 |
| FGFR4     | 1.01094  | -0.51116 | 3.931263 | 0.000835 | 0.005169 | -0.67547 |
| CDH7      | 0.770554 | -0.8132  | 3.931198 | 0.000835 | 0.005169 | -0.67562 |
| LOC254051 | 1.496895 | -0.51097 | 3.990259 | 0.00096  | 0.005705 | -0.67721 |
| CBFA2T3   | 0.888763 | -0.23772 | 3.930151 | 0.000837 | 0.005178 | -0.67796 |
| C5orf15   | -1.47524 | 0.403615 | -3.98192 | 0.000886 | 0.005385 | -0.67877 |
| SYCE3     | -1.72586 | 1.016424 | -3.92923 | 0.000839 | 0.005188 | -0.68003 |
| CRYL1     | 1.037818 | -0.56955 | 3.928321 | 0.000841 | 0.005197 | -0.68204 |
| PCDH9     | -1.38251 | 1.230472 | -3.928   | 0.000841 | 0.005199 | -0.68277 |
| C14orf128 | 1.032649 | -0.50407 | 3.999875 | 0.00094  | 0.005632 | -0.68459 |
| C6orf10   | 1.40026  | -0.42649 | 3.926912 | 0.000844 | 0.005209 | -0.68519 |
| HTR1F     | 1.38535  | -0.28713 | 3.938193 | 0.000893 | 0.005416 | -0.6887  |
| CCL27     | 0.701516 | -0.25835 | 3.925073 | 0.000847 | 0.00523  | -0.6893  |
| FYN       | 1.173894 | -0.37282 | 3.924697 | 0.000848 | 0.005233 | -0.69013 |
| TLK2      | -0.58629 | 0.205337 | -3.92318 | 0.000851 | 0.005249 | -0.69352 |
| HMHB1     | 0.788894 | -0.39738 | 3.92305  | 0.000851 | 0.005249 | -0.69381 |
| TEKT2     | 1.042611 | -0.44233 | 3.92299  | 0.000851 | 0.005249 | -0.69394 |
| MST1P2    | -0.71311 | 0.474144 | -3.92285 | 0.000852 | 0.005249 | -0.69426 |
| KANK2     | 1.163721 | -0.37738 | 3.922437 | 0.000852 | 0.005252 | -0.69518 |
| RALB      | -1.67619 | 0.871746 | -3.92179 | 0.000854 | 0.005256 | -0.69663 |
| NXT2      | -1.20501 | -0.059   | -3.99401 | 0.000952 | 0.005676 | -0.69673 |
| HGS       | -0.76714 | 0.719114 | -3.9217  | 0.000854 | 0.005256 | -0.69682 |
| WDR53     | -0.70702 | 0.375118 | -3.92161 | 0.000854 | 0.005256 | -0.69702 |
| RGS5      | -0.74742 | 0.128281 | -3.92155 | 0.000854 | 0.005256 | -0.69715 |
| VSIG1     | 0.762397 | -0.56081 | 3.920503 | 0.000856 | 0.005267 | -0.6995  |
| RPP38     | -0.49665 | 0.360369 | -3.92004 | 0.000857 | 0.00527  | -0.70053 |
| PLA2G3    | 1.040859 | -0.95751 | 3.919866 | 0.000857 | 0.00527  | -0.70092 |
| OTUD1     | -1.4944  | 0.618407 | -3.91921 | 0.000859 | 0.005277 | -0.70239 |
| UGT2B11   | -0.86005 | 0.14652  | -3.94197 | 0.000885 | 0.005385 | -0.706   |



|           |          |          |          |          |          |          |
|-----------|----------|----------|----------|----------|----------|----------|
| CADM4     | 0.692201 | -0.17742 | 3.917235 | 0.000863 | 0.005299 | -0.70679 |
| SPAG11B   | -1.12094 | 0.209314 | -3.91715 | 0.000863 | 0.005299 | -0.70698 |
| COPS7B    | -0.66955 | 0.680087 | -3.91682 | 0.000864 | 0.005301 | -0.70772 |
| C9orf46   | -0.724   | 0.149631 | -3.91591 | 0.000865 | 0.00531  | -0.70974 |
| ERC2      | -1.70715 | 0.333958 | -3.91583 | 0.000866 | 0.00531  | -0.70993 |
| PADI2     | -1.90004 | 1.156564 | -3.91516 | 0.000867 | 0.005317 | -0.71143 |
| COL4A5    | 1.570144 | -0.6757  | 3.914713 | 0.000868 | 0.005321 | -0.71242 |
| KCTD21    | -0.75237 | 0.36054  | -3.91438 | 0.000869 | 0.005323 | -0.71316 |
| KNCN      | -1.04041 | 0.462696 | -3.91404 | 0.000869 | 0.005326 | -0.71392 |
| ADAMTS12  | 1.014657 | -0.33302 | 3.913816 | 0.00087  | 0.005327 | -0.71442 |
| COL21A1   | -0.63583 | 0.092128 | -3.93779 | 0.000893 | 0.005418 | -0.71513 |
| KRT16     | 0.65268  | -0.24035 | 3.913461 | 0.00087  | 0.005329 | -0.71521 |
| PLEKHG5   | 0.951628 | -0.56467 | 3.913352 | 0.000871 | 0.005329 | -0.71546 |
| SRI       | -0.57977 | 0.183706 | -3.91316 | 0.000871 | 0.00533  | -0.71589 |
| KLRC4     | 0.789979 | -0.57913 | 3.912811 | 0.000872 | 0.005333 | -0.71667 |
| KBTBD3    | -1.60954 | 0.403791 | -3.91216 | 0.000873 | 0.005336 | -0.71811 |
| LOC645421 | 1.343107 | -0.67217 | 3.912161 | 0.000873 | 0.005336 | -0.71812 |
| AKAP8     | -0.40456 | 0.243905 | -3.91187 | 0.000874 | 0.005336 | -0.71877 |
| CCDC34    | -1.33114 | 0.631903 | -3.91181 | 0.000874 | 0.005336 | -0.7189  |
| MATK      | 1.218831 | -0.52721 | 3.911526 | 0.000874 | 0.005336 | -0.71953 |
| PGD       | -1.63274 | 0.919189 | -3.91147 | 0.000874 | 0.005336 | -0.71967 |
| GTF2H2D   | -1.2963  | 0.539975 | -3.9114  | 0.000875 | 0.005336 | -0.71981 |
| TBCK      | -1.17139 | 0.912426 | -3.91136 | 0.000875 | 0.005336 | -0.7199  |
| RNASEH1   | 1.255425 | -0.65577 | 3.911318 | 0.000875 | 0.005336 | -0.72    |
| ADSSL1    | 1.3419   | -0.77677 | 3.911138 | 0.000875 | 0.005337 | -0.7204  |
| ALG12     | -0.64632 | 0.635806 | -3.90998 | 0.000877 | 0.00535  | -0.72299 |
| SUCLG1    | -1.14887 | 0.430964 | -3.90973 | 0.000878 | 0.005351 | -0.72354 |
| LRGUK     | 0.877742 | -0.30733 | 3.933433 | 0.000902 | 0.005459 | -0.72465 |
| KDM4A     | -0.86391 | 0.783955 | -3.90889 | 0.00088  | 0.00536  | -0.72542 |
| THAP1     | -1.06625 | 0.369784 | -3.90694 | 0.000884 | 0.005383 | -0.72978 |
| RNF145    | -0.89106 | 0.358627 | -3.90675 | 0.000884 | 0.005383 | -0.73019 |
| APOA4     | 0.873739 | -0.4294  | 3.906063 | 0.000886 | 0.005385 | -0.73172 |
| LOC100293 | 0.838959 | -0.25744 | 3.906051 | 0.000886 | 0.005385 | -0.73175 |
| PPAT      | 0.78771  | -0.76184 | 3.904523 | 0.000889 | 0.005403 | -0.73516 |
| FBXO28    | -0.83771 | 0.23214  | -3.90413 | 0.00089  | 0.005405 | -0.73605 |
| CATSPER4  | 0.889246 | -0.51288 | 3.904082 | 0.00089  | 0.005405 | -0.73614 |
| RGS4      | -0.94938 | 0.059608 | -3.91626 | 0.000938 | 0.005622 | -0.73644 |
| WDR81     | 0.97318  | -0.32906 | 3.903572 | 0.000891 | 0.00541  | -0.73728 |
| KIAA0753  | -0.57498 | 0.345271 | -3.90344 | 0.000891 | 0.00541  | -0.73759 |
| SLC39A1   | -0.78742 | 0.434154 | -3.90315 | 0.000892 | 0.005412 | -0.73823 |
| CENPW     | -1.43156 | 1.107781 | -3.90256 | 0.000893 | 0.005416 | -0.73955 |
| SULT1E1   | 0.753564 | -0.19638 | 3.926311 | 0.000917 | 0.00552  | -0.74021 |
| SOS1      | -0.92142 | 0.725774 | -3.90096 | 0.000896 | 0.00543  | -0.7431  |
| C8orf84   | 1.049353 | -0.4716  | 3.900953 | 0.000896 | 0.00543  | -0.74312 |
| IL1F10    | 0.657706 | -0.40838 | 3.900909 | 0.000896 | 0.00543  | -0.74322 |
| SLCO1B3   | 1.694945 | -0.79881 | 3.912986 | 0.000945 | 0.005651 | -0.74355 |
| FAM189A1  | 0.765634 | -0.57431 | 3.90011  | 0.000898 | 0.005438 | -0.745   |

|           |          |          |          |          |          |          |
|-----------|----------|----------|----------|----------|----------|----------|
| CNNM3     | 0.633735 | -0.15337 | 3.899452 | 0.000899 | 0.005445 | -0.74647 |
| SYCP2L    | 0.675054 | -0.16903 | 3.898574 | 0.000901 | 0.005455 | -0.74843 |
| OGFOD2    | -0.86968 | 0.818937 | -3.89816 | 0.000902 | 0.005458 | -0.74936 |
| CXorf26   | -1.23115 | 0.852508 | -3.89773 | 0.000903 | 0.00546  | -0.75031 |
| TMC1      | 0.549718 | -0.4308  | 3.89668  | 0.000905 | 0.005471 | -0.75266 |
| C7orf51   | 0.880761 | -0.4507  | 4.205134 | 0.001251 | 0.006828 | -0.75273 |
| UBA1      | -1.15908 | 1.274148 | -3.89662 | 0.000905 | 0.005471 | -0.7528  |
| NAT1      | -1.66779 | 0.339438 | -3.90859 | 0.000955 | 0.005686 | -0.75312 |
| NDUFB5    | -0.79065 | 0.131339 | -3.89614 | 0.000906 | 0.005475 | -0.75387 |
| TWF1      | -1.5237  | 0.073573 | -3.89545 | 0.000908 | 0.005483 | -0.7554  |
| ASB7      | -1.34495 | 0.815467 | -3.89489 | 0.000909 | 0.005486 | -0.75665 |
| SLC22A13  | -0.78686 | 0.364246 | -3.89472 | 0.000909 | 0.005486 | -0.75702 |
| LACE1     | -0.9033  | 0.459917 | -3.8947  | 0.000909 | 0.005486 | -0.75708 |
| FAM64A    | -1.55853 | 0.892396 | -3.89465 | 0.000909 | 0.005486 | -0.7572  |
| PIH1D2    | 1.304295 | -0.76196 | 3.906573 | 0.000959 | 0.005701 | -0.75751 |
| SPTLC2    | -1.44494 | 0.64213  | -3.89437 | 0.00091  | 0.005486 | -0.75781 |
| CPT1B     | -1.22401 | 0.827833 | -3.89436 | 0.00091  | 0.005486 | -0.75784 |
| NSUN5P2   | -0.70142 | 0.684707 | -3.8933  | 0.000912 | 0.005498 | -0.7602  |
| CSF1R     | 1.993941 | -0.81471 | 3.891957 | 0.000915 | 0.005514 | -0.76319 |
| FBXL18    | -1.15475 | 0.716629 | -3.89155 | 0.000916 | 0.005517 | -0.7641  |
| SLITRK4   | 1.138809 | -0.82952 | 3.891311 | 0.000916 | 0.005519 | -0.76463 |
| FAM98C    | -0.68736 | 0.505971 | -3.89096 | 0.000917 | 0.00552  | -0.76541 |
| ATP7B     | 0.668771 | -0.39874 | 3.890552 | 0.000918 | 0.005523 | -0.76633 |
| WAC       | -0.9998  | 0.904252 | -3.88983 | 0.00092  | 0.005531 | -0.76794 |
| HEXIM2    | 0.690207 | -0.21878 | 3.889684 | 0.00092  | 0.005531 | -0.76826 |
| AP3S1     | -0.71252 | 0.22413  | -3.88947 | 0.00092  | 0.005532 | -0.76875 |
| SCYL2     | -1.16462 | 0.275466 | -3.88805 | 0.000923 | 0.005549 | -0.7719  |
| ZSCAN1    | 0.831413 | -0.48949 | 3.887516 | 0.000925 | 0.005554 | -0.7731  |
| ZNF430    | -1.01928 | 0.440926 | -3.8866  | 0.000927 | 0.005564 | -0.77514 |
| C19orf63  | -0.45353 | 0.281277 | -3.88641 | 0.000927 | 0.005565 | -0.77557 |
| TNFRSF4   | 0.917109 | -0.47952 | 3.885241 | 0.00093  | 0.005578 | -0.77817 |
| PRKCA     | -0.6607  | 0.399083 | -3.88476 | 0.000931 | 0.005583 | -0.77925 |
| MYH8      | 1.329532 | -0.7151  | 3.908559 | 0.001042 | 0.006052 | -0.78133 |
| PCBD2     | -0.68563 | 0.4315   | -3.88242 | 0.000936 | 0.005612 | -0.78445 |
| CD244     | 1.339038 | -0.52946 | 3.881894 | 0.000937 | 0.005617 | -0.78564 |
| BHLHA15   | 0.765753 | -0.41266 | 3.881156 | 0.000938 | 0.005622 | -0.78728 |
| SULT2A1   | 0.724824 | -0.37177 | 3.88113  | 0.000938 | 0.005622 | -0.78734 |
| KIAA0368  | 1.150323 | -0.38968 | 3.891884 | 0.000992 | 0.005843 | -0.78946 |
| BAZ1B     | -0.59425 | 0.662825 | -3.87965 | 0.000942 | 0.005637 | -0.79063 |
| LYL1      | 1.216527 | -0.27099 | 3.879546 | 0.000942 | 0.005637 | -0.79087 |
| ANP32E    | -0.98428 | 0.597972 | -3.87841 | 0.000944 | 0.005649 | -0.79341 |
| C9orf72   | -1.77958 | 0.613184 | -3.8784  | 0.000944 | 0.005649 | -0.79343 |
| SIRT7     | -0.71265 | 0.494521 | -3.87803 | 0.000945 | 0.005651 | -0.79424 |
| LOC10013: | -1.14942 | 1.141186 | -3.87768 | 0.000946 | 0.005652 | -0.79504 |
| MAP3K9    | 0.501899 | -0.31208 | 3.877639 | 0.000946 | 0.005652 | -0.79512 |
| FCN2      | 1.466819 | -0.40548 | 3.877045 | 0.000947 | 0.005657 | -0.79645 |
| STAM2     | -1.18061 | 0.686756 | -3.87699 | 0.000948 | 0.005657 | -0.79657 |

|          |          |          |          |          |          |          |
|----------|----------|----------|----------|----------|----------|----------|
| LMF2     | 0.71936  | -0.17885 | 3.876181 | 0.000949 | 0.005666 | -0.79837 |
| BAHD1    | 0.697191 | -0.41652 | 3.875922 | 0.00095  | 0.005668 | -0.79895 |
| GRIN1    | 0.973734 | -0.56483 | 3.875735 | 0.00095  | 0.005668 | -0.79937 |
| PLVAP    | 2.30172  | -0.57946 | 3.875473 | 0.000951 | 0.00567  | -0.79995 |
| RBCK1    | -0.79951 | 0.702122 | -3.87483 | 0.000952 | 0.005676 | -0.80139 |
| CHODL    | 0.778261 | -0.5366  | 3.873921 | 0.000954 | 0.005686 | -0.80341 |
| TBC1D3P5 | 1.02328  | -0.56564 | 3.87362  | 0.000955 | 0.005686 | -0.80408 |
| TMED7    | -1.05903 | 0.25684  | -3.87339 | 0.000956 | 0.005687 | -0.80459 |
| AP3B2    | -3.30424 | 2.035906 | -3.87274 | 0.000957 | 0.005694 | -0.80604 |
| IL17F    | 1.074177 | -0.55843 | 3.872371 | 0.000958 | 0.005696 | -0.80687 |
| GRAMD1A  | -1.01067 | 0.969588 | -3.87235 | 0.000958 | 0.005696 | -0.80691 |
| TNPO3    | -1.4975  | 1.284015 | -3.87189 | 0.000959 | 0.0057   | -0.80793 |
| KLRF1    | 1.356213 | -0.79624 | 4.238055 | 0.001432 | 0.007502 | -0.80812 |
| ERVFRD-1 | -0.86713 | 0.085218 | -3.8949  | 0.000985 | 0.005812 | -0.80877 |
| LOC64418 | 0.806081 | -0.51921 | 3.909595 | 0.00104  | 0.006042 | -0.80914 |
| CDC42EP3 | -1.54274 | 0.851029 | -3.87061 | 0.000962 | 0.005712 | -0.8108  |
| COL12A1  | 1.722763 | -0.65517 | 3.908599 | 0.001042 | 0.006052 | -0.81126 |
| SIKE1    | -1.4038  | 0.777443 | -3.8703  | 0.000962 | 0.005713 | -0.81148 |
| LRRCS5   | -1.13633 | 0.219606 | -3.90838 | 0.001043 | 0.006052 | -0.81173 |
| ATP2A2   | -1.33968 | 1.100725 | -3.87013 | 0.000963 | 0.005713 | -0.81186 |
| LOC64551 | -1.44612 | 0.752656 | -3.87    | 0.000963 | 0.005713 | -0.81215 |
| TBX19    | -0.62571 | 0.14437  | -3.86998 | 0.000963 | 0.005713 | -0.81219 |
| FAM100A  | 0.796051 | -0.28822 | 3.869879 | 0.000963 | 0.005713 | -0.81242 |
| COX7A1   | 1.211791 | -0.45802 | 3.869803 | 0.000964 | 0.005713 | -0.81259 |
| UFM1     | 0.740241 | -0.18259 | 3.869641 | 0.000964 | 0.005713 | -0.81295 |
| NPRL3    | 1.866181 | -0.54955 | 3.868926 | 0.000966 | 0.005721 | -0.81455 |
| BMS1P1   | -1.15598 | 0.177069 | -3.86821 | 0.000967 | 0.005729 | -0.81615 |
| NFIA     | 0.80603  | -0.46055 | 3.867754 | 0.000968 | 0.005732 | -0.81716 |
| PPP6R2   | -0.56731 | 0.441169 | -3.8677  | 0.000968 | 0.005732 | -0.81729 |
| LYPD2    | 1.982743 | -1.04176 | 3.867537 | 0.000969 | 0.005732 | -0.81765 |
| DZANK1   | -0.5338  | 0.156869 | -3.86667 | 0.000971 | 0.005742 | -0.81959 |
| LPPR5    | 1.079879 | -0.32407 | 3.866584 | 0.000971 | 0.005742 | -0.81977 |
| CHKA     | -0.96977 | 0.614654 | -3.86643 | 0.000971 | 0.005742 | -0.82011 |
| ELOVL2   | -1.24733 | 0.222119 | -3.90412 | 0.001053 | 0.006092 | -0.82078 |
| SLFN12   | -1.37328 | 0.414964 | -3.90397 | 0.001053 | 0.006092 | -0.82109 |
| RNF135   | -1.14418 | 0.942468 | -3.86579 | 0.000973 | 0.005749 | -0.82153 |
| ALAS2    | 2.91805  | -0.97717 | 3.865382 | 0.000974 | 0.005751 | -0.82245 |
| TRIM65   | 0.597808 | -0.03566 | 3.865378 | 0.000974 | 0.005751 | -0.82246 |
| MIER3    | 0.886477 | -0.45861 | 3.864138 | 0.000976 | 0.005766 | -0.82522 |
| NIPSNAP3 | -0.96768 | 0.454458 | -3.86338 | 0.000978 | 0.005774 | -0.82692 |
| MYPN     | -0.74762 | 0.216932 | -3.88388 | 0.00101  | 0.005921 | -0.83282 |
| RCCD1    | -0.883   | 0.5638   | -3.86069 | 0.000984 | 0.005809 | -0.8329  |
| PSMB6    | -0.62283 | 0.402426 | -3.85951 | 0.000987 | 0.005821 | -0.83553 |
| CDC5L    | -0.76974 | 0.397924 | -3.85866 | 0.000989 | 0.005831 | -0.83744 |
| HSD3B2   | 0.734744 | -0.33905 | 3.857856 | 0.000991 | 0.00584  | -0.83922 |
| SPTSSA   | -1.428   | 0.394062 | -3.85735 | 0.000992 | 0.005843 | -0.84034 |
| LOC40112 | 0.713606 | -0.64165 | 3.857255 | 0.000992 | 0.005843 | -0.84056 |

|           |          |          |          |          |          |          |
|-----------|----------|----------|----------|----------|----------|----------|
| CEBPZ     | -1.15418 | 0.65403  | -3.87989 | 0.001019 | 0.005955 | -0.84153 |
| CENPO     | -0.72103 | 0.651916 | -3.85667 | 0.000993 | 0.005849 | -0.84186 |
| BRP44     | -0.61129 | 0.18906  | -3.85643 | 0.000994 | 0.005851 | -0.8424  |
| PLIN5     | -1.63606 | 1.020263 | -3.85531 | 0.000997 | 0.005864 | -0.8449  |
| PPBPL2    | 1.33111  | -0.52776 | 3.878461 | 0.001114 | 0.006295 | -0.84493 |
| DNAJC3-AS | -1.34568 | 1.361948 | -3.85499 | 0.000997 | 0.005865 | -0.8456  |
| ZNF787    | -0.84365 | 0.764536 | -3.85496 | 0.000997 | 0.005865 | -0.84567 |
| RASSF5    | -1.22625 | 1.137493 | -3.854   | 0.001    | 0.005877 | -0.84782 |
| TNFRSF10A | -0.86001 | 0.517821 | -3.85386 | 0.001    | 0.005877 | -0.84811 |
| RPA1      | 0.971083 | -0.53392 | 3.853615 | 0.001001 | 0.005878 | -0.84867 |
| HNRNPA1L  | -0.95429 | 0.672828 | -3.8535  | 0.001001 | 0.005878 | -0.84893 |
| CAP1      | -1.26095 | 0.843245 | -3.85153 | 0.001005 | 0.005904 | -0.85331 |
| DHTKD1    | -1.19672 | 0.77398  | -3.85116 | 0.001006 | 0.005907 | -0.85414 |
| SCRN1     | 0.944776 | -0.21204 | 3.851049 | 0.001007 | 0.005907 | -0.85439 |
| CSNK1G1   | -0.68788 | 0.628228 | -3.85081 | 0.001007 | 0.005908 | -0.85492 |
| DYNC1LI2  | -1.45519 | 0.601304 | -3.85073 | 0.001007 | 0.005908 | -0.85509 |
| CCDC37    | -0.60149 | 0.171953 | -3.88696 | 0.001093 | 0.006228 | -0.85721 |
| FBXL19    | 0.848452 | -0.44259 | 3.849481 | 0.00101  | 0.005921 | -0.85788 |
| CABP4     | 0.844612 | -0.37239 | 3.849302 | 0.001011 | 0.005922 | -0.85828 |
| RPAP1     | 0.779889 | -0.35581 | 3.848437 | 0.001013 | 0.005932 | -0.86021 |
| FLJ14107  | -0.71803 | 0.593887 | -3.84826 | 0.001013 | 0.005933 | -0.8606  |
| C14orf101 | -1.56666 | 0.705973 | -3.84791 | 0.001014 | 0.005936 | -0.86139 |
| TCP10L    | 0.70016  | -0.28235 | 3.847593 | 0.001015 | 0.005938 | -0.86209 |
| ARHGAP27  | -1.19635 | 1.043101 | -3.84709 | 0.001016 | 0.005943 | -0.86321 |
| IL18R1    | -3.18534 | 1.750623 | -3.84704 | 0.001016 | 0.005943 | -0.86333 |
| ECHDC3    | -1.39118 | 0.675698 | -3.84611 | 0.001018 | 0.005954 | -0.86538 |
| SPNS3     | 1.364374 | -0.65644 | 3.845926 | 0.001019 | 0.005954 | -0.8658  |
| DENND1C   | -0.63509 | 0.582515 | -3.84569 | 0.001019 | 0.005955 | -0.86633 |
| ND3       | 1.282166 | -0.87979 | 3.845444 | 0.00102  | 0.005956 | -0.86688 |
| PI4KB     | -0.72337 | 0.670697 | -3.84465 | 0.001022 | 0.005964 | -0.86864 |
| ARID3A    | -1.06573 | 1.05961  | -3.84453 | 0.001022 | 0.005964 | -0.86891 |
| SLC2A12   | 1.048945 | -0.28805 | 3.844453 | 0.001022 | 0.005964 | -0.86908 |
| LIMCH1    | -0.84205 | 0.075421 | -3.86657 | 0.001051 | 0.006087 | -0.87059 |
| SLC13A2   | 0.534783 | -0.46451 | 3.843671 | 0.001024 | 0.005973 | -0.87083 |
| KANK3     | 0.884525 | -0.4684  | 3.843428 | 0.001025 | 0.005975 | -0.87137 |
| FAM71E2   | 1.890798 | -0.44528 | 3.865825 | 0.001146 | 0.006432 | -0.87163 |
| DCTN5     | -0.64382 | 0.412025 | -3.84322 | 0.001025 | 0.005976 | -0.87184 |
| TCP10     | 0.996498 | -0.33012 | 3.865694 | 0.001053 | 0.006092 | -0.8725  |
| CKAP4     | -2.01814 | 1.396768 | -3.84223 | 0.001027 | 0.005988 | -0.87404 |
| HEBP2     | -1.06825 | 0.376267 | -3.84179 | 0.001029 | 0.005992 | -0.87502 |
| PPP2R5B   | 0.963534 | -0.41718 | 3.840606 | 0.001031 | 0.006007 | -0.87765 |
| GBA       | -1.21743 | 0.720319 | -3.84007 | 0.001033 | 0.006013 | -0.87885 |
| CCDC69    | -0.91961 | 0.610726 | -3.8396  | 0.001034 | 0.006018 | -0.87989 |
| ODZ2      | 0.951827 | -0.68668 | 3.88718  | 0.001093 | 0.006228 | -0.88075 |
| LOC100286 | -1.73953 | 1.171372 | -3.83913 | 0.001035 | 0.006022 | -0.88094 |
| STON2     | 1.147366 | -0.40066 | 3.838288 | 0.001037 | 0.006032 | -0.88282 |
| U2AF1     | -0.59956 | 0.214662 | -3.83798 | 0.001038 | 0.006034 | -0.8835  |

|           |          |          |          |          |          |          |
|-----------|----------|----------|----------|----------|----------|----------|
| KIAA0528  | -1.05461 | 0.149533 | -3.83791 | 0.001038 | 0.006034 | -0.88365 |
| GOLGA7    | -0.85355 | 0.511638 | -3.83763 | 0.001039 | 0.006036 | -0.88428 |
| RILP      | 1.623588 | -0.53179 | 3.835912 | 0.001043 | 0.006052 | -0.88811 |
| TCEB3C    | -1.39621 | 0.357023 | -3.83542 | 0.001044 | 0.006057 | -0.8892  |
| HNRNPK    | -0.74623 | 0.730886 | -3.83472 | 0.001046 | 0.006065 | -0.89076 |
| WDR1      | -0.77495 | 0.665599 | -3.83393 | 0.001047 | 0.006074 | -0.89252 |
| AADAT     | -0.9671  | 0.222874 | -3.83351 | 0.001049 | 0.006078 | -0.89346 |
| ZWILCH    | -1.03406 | 0.517889 | -3.83325 | 0.001049 | 0.00608  | -0.89403 |
| LOC64521  | -0.56934 | 0.495083 | -3.83219 | 0.001052 | 0.006092 | -0.89639 |
| NLRP4     | 1.016722 | -0.63599 | 3.831598 | 0.001053 | 0.006092 | -0.89771 |
| GRRP1     | 0.739645 | -0.45312 | 3.83152  | 0.001053 | 0.006092 | -0.89789 |
| GDF9      | -1.24658 | 0.549805 | -3.83055 | 0.001056 | 0.006104 | -0.90005 |
| C6orf201  | -0.85123 | 0.156106 | -3.83035 | 0.001056 | 0.006105 | -0.9005  |
| COG7      | -0.61061 | 0.364446 | -3.83016 | 0.001057 | 0.006106 | -0.90091 |
| AURKB     | -1.42607 | 1.169329 | -3.8291  | 0.001059 | 0.006119 | -0.90329 |
| NPC1L1    | 0.827103 | -0.4187  | 3.828373 | 0.001061 | 0.006125 | -0.90489 |
| LOC100130 | 0.790134 | -0.4447  | 3.828311 | 0.001061 | 0.006125 | -0.90503 |
| RNF39     | 0.779743 | -0.50575 | 3.828271 | 0.001061 | 0.006125 | -0.90512 |
| TMCC2     | 1.748445 | -0.56328 | 3.828118 | 0.001062 | 0.006125 | -0.90546 |
| NSMCE4A   | -0.99739 | 0.459699 | -3.82807 | 0.001062 | 0.006125 | -0.90556 |
| CATSPERG  | 1.59425  | -1.18379 | 3.838372 | 0.00112  | 0.006319 | -0.90577 |
| PVRL2     | -2.03274 | 1.297361 | -3.82792 | 0.001062 | 0.006125 | -0.90591 |
| TOR2A     | -0.45329 | 0.357877 | -3.8275  | 0.001063 | 0.006129 | -0.90683 |
| CTAGE6P   | -1.08289 | 0.275721 | -3.84963 | 0.001092 | 0.006227 | -0.90754 |
| GTDC1     | -1.82064 | 0.798345 | -3.82701 | 0.001065 | 0.006134 | -0.90794 |
| ISG20L2   | -0.59574 | 0.480538 | -3.82691 | 0.001065 | 0.006134 | -0.90814 |
| PRSS53    | 0.574568 | -0.4117  | 3.849279 | 0.001093 | 0.006228 | -0.9083  |
| NUMBL     | 1.158541 | -0.6741  | 3.826233 | 0.001066 | 0.006142 | -0.90966 |
| GIT2      | -0.80311 | 0.534537 | -3.82612 | 0.001067 | 0.006142 | -0.90991 |
| CAPN1     | -1.24666 | 1.170971 | -3.8259  | 0.001067 | 0.006143 | -0.91039 |
| EXOC6     | -2.79738 | 1.349701 | -3.82581 | 0.001067 | 0.006143 | -0.91059 |
| TNNI3     | 0.836841 | -0.31247 | 3.825394 | 0.001069 | 0.006145 | -0.91153 |
| TRIM74    | 0.724388 | -0.56676 | 3.825279 | 0.001069 | 0.006145 | -0.91178 |
| TRABD     | -0.65338 | 0.36387  | -3.82525 | 0.001069 | 0.006145 | -0.91184 |
| GAS6      | -1.65305 | 1.299089 | -3.82465 | 0.00107  | 0.006148 | -0.91318 |
| NPB       | 0.816119 | -0.42876 | 3.824558 | 0.001071 | 0.006148 | -0.91339 |
| P4HA1     | -1.32912 | 0.588375 | -3.82439 | 0.001071 | 0.006148 | -0.91376 |
| GSTM3     | 1.105089 | -0.33955 | 3.824389 | 0.001071 | 0.006148 | -0.91377 |
| DGKA      | -0.98402 | 1.054356 | -3.82435 | 0.001071 | 0.006148 | -0.91385 |
| NCS1      | 1.260362 | -0.4605  | 3.824245 | 0.001071 | 0.006148 | -0.91409 |
| NSUN7     | -3.20516 | 1.710402 | -3.8241  | 0.001072 | 0.006148 | -0.91441 |
| PIK3CA    | -1.0743  | 0.337573 | -3.82407 | 0.001072 | 0.006148 | -0.91448 |
| UCK2      | -0.75623 | 0.81277  | -3.8238  | 0.001072 | 0.00615  | -0.91508 |
| WNT9B     | 0.843697 | -0.42409 | 3.845957 | 0.001101 | 0.006257 | -0.91555 |
| ITIH2     | 1.455161 | -0.27871 | 3.844964 | 0.0012   | 0.006636 | -0.9157  |
| HEATR2    | 0.647753 | -0.32352 | 3.823016 | 0.001074 | 0.006159 | -0.91682 |
| FADD      | -0.84305 | 0.628924 | -3.82261 | 0.001075 | 0.006163 | -0.91772 |

|           |          |          |          |          |          |          |
|-----------|----------|----------|----------|----------|----------|----------|
| TMC4      | -1.77043 | 1.0281   | -3.82206 | 0.001077 | 0.006169 | -0.91894 |
| FMNL2     | 0.959192 | -0.46676 | 3.821982 | 0.001077 | 0.006169 | -0.91912 |
| DHRS4L1   | 0.790302 | -0.38651 | 3.821844 | 0.001077 | 0.006169 | -0.91943 |
| PIP5K1A   | -0.52335 | 0.271273 | -3.82173 | 0.001078 | 0.006169 | -0.91969 |
| AKAP8L    | -0.77297 | 0.766738 | -3.82071 | 0.00108  | 0.006182 | -0.92196 |
| CCNT2     | -1.98443 | 0.557246 | -3.82009 | 0.001082 | 0.006188 | -0.92333 |
| TMEM79    | -0.62022 | 0.528962 | -3.82001 | 0.001082 | 0.006188 | -0.9235  |
| FAM172A   | -0.6918  | 0.010658 | -3.81968 | 0.001083 | 0.006191 | -0.92425 |
| ASCL2     | 0.771445 | -0.29021 | 3.81941  | 0.001084 | 0.006193 | -0.92485 |
| KCNA3     | 1.245803 | -0.28365 | 3.818755 | 0.001085 | 0.006201 | -0.92631 |
| RASA4P    | 0.899115 | -0.40933 | 3.818649 | 0.001085 | 0.006201 | -0.92654 |
| TLR5      | -1.82226 | 1.206063 | -3.81839 | 0.001086 | 0.006202 | -0.92711 |
| FREM1     | 1.0462   | -0.46592 | 3.839202 | 0.001216 | 0.006703 | -0.92787 |
| PTPRJ     | -0.69162 | 0.457356 | -3.81796 | 0.001087 | 0.006207 | -0.92807 |
| OBFC2A    | -1.64264 | 0.281138 | -3.81769 | 0.001088 | 0.006208 | -0.92868 |
| RDH16     | 0.549594 | -0.20342 | 3.817646 | 0.001088 | 0.006208 | -0.92877 |
| KIAA0408  | 0.784722 | -0.50509 | 3.993702 | 0.001357 | 0.007227 | -0.92879 |
| PAPD4     | -1.26109 | 0.455509 | -3.81696 | 0.00109  | 0.006216 | -0.9303  |
| CLCA3P    | 1.930546 | -1.38109 | 3.849967 | 0.0013   | 0.007022 | -0.93085 |
| SLCO6A1   | 0.720097 | -0.23143 | 3.837838 | 0.001122 | 0.006323 | -0.93325 |
| ATP12A    | 0.941388 | -0.60078 | 3.879546 | 0.00122  | 0.006719 | -0.9336  |
| STRAP     | -0.60065 | 0.219022 | -3.81547 | 0.001093 | 0.006228 | -0.93363 |
| PTPN3     | -0.95426 | 0.24129  | -3.81527 | 0.001094 | 0.00623  | -0.93407 |
| REN       | 1.13932  | -0.38003 | 3.81483  | 0.001095 | 0.006234 | -0.93504 |
| RAB42     | 0.533414 | -0.28907 | 3.814271 | 0.001097 | 0.00624  | -0.93629 |
| LOC728640 | -0.71307 | 0.217106 | -3.81415 | 0.001097 | 0.00624  | -0.93655 |
| PHF11     | -1.03698 | 0.498845 | -3.81394 | 0.001097 | 0.006241 | -0.93701 |
| WIPF3     | 0.84471  | -0.82782 | 3.813326 | 0.001099 | 0.006249 | -0.93839 |
| CALML4    | 1.055738 | -0.34935 | 3.813148 | 0.001099 | 0.006249 | -0.93878 |
| TRPC2     | 0.81402  | -0.39431 | 3.81239  | 0.001101 | 0.006257 | -0.94047 |
| TMEM179I  | -0.79032 | 0.553415 | -3.8117  | 0.001103 | 0.006264 | -0.942   |
| LOC100507 | -1.23103 | 0.402834 | -3.8115  | 0.001104 | 0.006264 | -0.94244 |
| C17orf99  | 1.444908 | -0.5145  | 3.811496 | 0.001104 | 0.006264 | -0.94246 |
| HSDL1     | -1.39871 | 0.358954 | -3.81127 | 0.001104 | 0.006265 | -0.94298 |
| CPA6      | -1.11553 | 0.279645 | -3.81124 | 0.001104 | 0.006265 | -0.94303 |
| SENP5     | -0.84986 | 0.537842 | -3.81083 | 0.001105 | 0.006267 | -0.94393 |
| SLC5A9    | -1.006   | 0.242528 | -3.8108  | 0.001105 | 0.006267 | -0.94401 |
| RBP2      | -1.35302 | 0.173376 | -3.84605 | 0.001197 | 0.006622 | -0.94407 |
| RBM23     | -1.36697 | 1.33233  | -3.81055 | 0.001106 | 0.006267 | -0.94457 |
| MUL1      | -0.54899 | 0.478844 | -3.81054 | 0.001106 | 0.006267 | -0.94459 |
| ACSL4     | -1.74667 | 0.554181 | -3.81044 | 0.001106 | 0.006267 | -0.94481 |
| PUS10     | -1.02868 | 0.804028 | -3.81009 | 0.001107 | 0.006268 | -0.94558 |
| MYOZ1     | 0.710954 | -0.32771 | 3.809902 | 0.001108 | 0.006268 | -0.94601 |
| RAB1A     | -1.35124 | 0.621956 | -3.8098  | 0.001108 | 0.006268 | -0.94623 |
| TNIP1     | -1.21549 | 1.088853 | -3.80977 | 0.001108 | 0.006268 | -0.94629 |
| LOC100133 | 1.026914 | -0.09775 | 3.809729 | 0.001108 | 0.006268 | -0.94639 |
| RNGTT     | -0.84299 | 0.225031 | -3.80866 | 0.001111 | 0.006282 | -0.94877 |

|           |          |          |          |          |          |          |
|-----------|----------|----------|----------|----------|----------|----------|
| ABHD3     | -1.44054 | 0.686306 | -3.80855 | 0.001111 | 0.006282 | -0.94901 |
| PIP5K1C   | -1.07669 | 1.209513 | -3.80781 | 0.001113 | 0.006291 | -0.95066 |
| MGC27382  | 0.841693 | -0.17171 | 3.807318 | 0.001114 | 0.006295 | -0.95176 |
| TG        | 1.217655 | -0.51346 | 3.807032 | 0.001115 | 0.006297 | -0.95239 |
| RAB43     | -0.76308 | 0.978311 | -3.80622 | 0.001117 | 0.006305 | -0.9542  |
| PTPLAD2   | -1.22016 | 0.581996 | -3.80615 | 0.001117 | 0.006305 | -0.95435 |
| GOLGA6L9  | -1.00828 | 0.152177 | -3.80609 | 0.001118 | 0.006305 | -0.95449 |
| FAM55C    | -1.05816 | 0.454901 | -3.80488 | 0.001121 | 0.00632  | -0.95719 |
| RRAGD     | -1.49881 | 0.863084 | -3.80392 | 0.001123 | 0.00633  | -0.95933 |
| XRCC1     | -0.56631 | 0.592513 | -3.80358 | 0.001124 | 0.006333 | -0.96006 |
| HIGD1B    | 0.775412 | -0.5892  | 3.825235 | 0.001154 | 0.006462 | -0.96072 |
| EMILIN2   | -1.64429 | 0.708211 | -3.80324 | 0.001125 | 0.006336 | -0.96083 |
| LOC100133 | -1.3602  | 0.267838 | -3.80256 | 0.001127 | 0.006345 | -0.96235 |
| LBX2      | 0.935472 | -0.4973  | 3.80198  | 0.001128 | 0.006351 | -0.96364 |
| MTTP      | 0.683695 | -0.26382 | 3.811414 | 0.001191 | 0.006605 | -0.96432 |
| GHITM     | -0.79356 | 0.23222  | -3.80166 | 0.001129 | 0.006354 | -0.96434 |
| PAPD5     | -1.00934 | 0.547566 | -3.80144 | 0.00113  | 0.006356 | -0.96483 |
| FAM83D    | -1.09544 | 0.219088 | -3.80063 | 0.001132 | 0.006366 | -0.96663 |
| ASL       | -0.73704 | 0.355294 | -3.79988 | 0.001134 | 0.006375 | -0.96831 |
| LOC100506 | -1.56775 | 1.082243 | -3.82157 | 0.001164 | 0.006507 | -0.96871 |
| SYT14L    | 1.241805 | -0.19179 | 3.798693 | 0.001137 | 0.006391 | -0.97095 |
| CHMP3     | -1.12032 | 0.818256 | -3.79759 | 0.00114  | 0.006405 | -0.9734  |
| OMA1      | -1.01488 | 0.275966 | -3.79736 | 0.001141 | 0.006407 | -0.97391 |
| GAS7      | -1.89415 | 1.058328 | -3.79694 | 0.001142 | 0.006411 | -0.97484 |
| USP38     | 0.747161 | -0.2223  | 3.818034 | 0.001173 | 0.006547 | -0.97641 |
| PLIN3     | -1.02738 | 0.742477 | -3.79579 | 0.001145 | 0.006427 | -0.97741 |
| C17orf64  | 1.214012 | -0.66886 | 3.804769 | 0.001209 | 0.006677 | -0.97875 |
| CXorf40B  | -0.45116 | 0.277788 | -3.79495 | 0.001147 | 0.006436 | -0.97928 |
| HOXC5     | 1.375085 | -0.4235  | 3.794555 | 0.001148 | 0.00644  | -0.98015 |
| POM121L9  | -0.86492 | 0.083677 | -3.79418 | 0.001149 | 0.006441 | -0.98099 |
| RARG      | 0.807574 | -0.27137 | 3.794127 | 0.001149 | 0.006441 | -0.9811  |
| ALAD      | -0.7329  | 0.544176 | -3.79407 | 0.001149 | 0.006441 | -0.98122 |
| C11orf45  | 1.067102 | -0.52284 | 3.815664 | 0.00118  | 0.00656  | -0.98157 |
| TMCO2     | -0.61859 | 0.104309 | -3.79313 | 0.001152 | 0.006454 | -0.98332 |
| C20orf20  | -0.70591 | 0.397371 | -3.79275 | 0.001153 | 0.006457 | -0.98417 |
| SHISA9    | 0.637611 | -0.41662 | 3.79264  | 0.001153 | 0.006457 | -0.98441 |
| C12orf32  | -0.86229 | 0.650369 | -3.79115 | 0.001157 | 0.006476 | -0.98773 |
| KIAA1432  | -0.70388 | 0.286733 | -3.79087 | 0.001158 | 0.006478 | -0.98834 |
| VAMP3     | -1.19914 | 0.454242 | -3.79018 | 0.00116  | 0.006487 | -0.98989 |
| THBS3     | -0.81702 | 0.495895 | -3.78873 | 0.001164 | 0.006507 | -0.99311 |
| ZSCAN10   | 1.051052 | -0.64192 | 3.788193 | 0.001165 | 0.006512 | -0.9943  |
| FLJ40852  | -0.3821  | -0.07281 | -3.85013 | 0.0013   | 0.007022 | -0.99448 |
| RABGAP1L  | -0.85432 | 0.589471 | -3.78761 | 0.001167 | 0.006516 | -0.9956  |
| TTC14     | -1.37662 | 0.346309 | -3.78761 | 0.001167 | 0.006516 | -0.9956  |
| PEX2      | -1.2831  | -0.02147 | -3.78753 | 0.001167 | 0.006516 | -0.99578 |
| PRX       | 0.755518 | -0.12096 | 3.786892 | 0.001169 | 0.006524 | -0.99719 |
| GRM1      | -1.06045 | 0.342758 | -3.78528 | 0.001173 | 0.006546 | -1.00076 |

|           |          |          |          |          |          |          |
|-----------|----------|----------|----------|----------|----------|----------|
| FAM154A   | 0.644694 | -0.18587 | 3.78499  | 0.001174 | 0.006547 | -1.00142 |
| HDAC9     | 1.393282 | -0.57714 | 3.784846 | 0.001174 | 0.006548 | -1.00174 |
| OS9       | -1.05674 | 0.760324 | -3.78442 | 0.001175 | 0.006552 | -1.00269 |
| MPEG1     | 0.733349 | -0.34822 | 3.78405  | 0.001176 | 0.006554 | -1.00351 |
| LOC100125 | 0.780007 | -0.47125 | 3.783962 | 0.001177 | 0.006554 | -1.0037  |
| CDH23     | -1.36504 | 1.023935 | -3.78389 | 0.001177 | 0.006554 | -1.00387 |
| ZNF573    | 0.970637 | -0.61766 | 3.783776 | 0.001177 | 0.006554 | -1.00412 |
| PILRB     | -0.50261 | 0.550377 | -3.7836  | 0.001178 | 0.006555 | -1.00452 |
| ZCCHC10   | -0.9974  | 0.11658  | -3.78346 | 0.001178 | 0.006555 | -1.00483 |
| ITGA7     | -2.36693 | 1.380635 | -3.78338 | 0.001178 | 0.006555 | -1.00501 |
| CASP1     | -1.32591 | 0.851371 | -3.78283 | 0.00118  | 0.00656  | -1.00623 |
| C15orf59  | 0.939322 | -0.33604 | 3.782691 | 0.00118  | 0.00656  | -1.00653 |
| RAB22A    | -0.9438  | 0.37113  | -3.78236 | 0.001181 | 0.006563 | -1.00726 |
| KRT17     | 1.336716 | -0.97931 | 3.781648 | 0.001183 | 0.006569 | -1.00885 |
| SIGLEC7   | -1.35478 | 0.930273 | -3.78163 | 0.001183 | 0.006569 | -1.00889 |
| NPSR1     | 1.463121 | -0.65909 | 3.781609 | 0.001183 | 0.006569 | -1.00894 |
| NLRC5     | -1.23241 | 1.097735 | -3.78099 | 0.001185 | 0.006577 | -1.01032 |
| LOC148415 | -0.63199 | 0.520852 | -3.78053 | 0.001186 | 0.006582 | -1.01134 |
| CENPF     | -1.51173 | 0.914328 | -3.77961 | 0.001189 | 0.006593 | -1.01338 |
| RASGEF1B  | -1.26501 | 0.368116 | -3.77954 | 0.001189 | 0.006593 | -1.01353 |
| ARMC8     | -0.92705 | 0.477684 | -3.77841 | 0.001192 | 0.006607 | -1.01605 |
| PLXND1    | 1.486074 | -0.28484 | 3.778205 | 0.001193 | 0.006607 | -1.0165  |
| SYDE1     | 0.915932 | -0.61473 | 3.778141 | 0.001193 | 0.006607 | -1.01664 |
| LOC283865 | -0.90682 | 0.363866 | -3.77771 | 0.001194 | 0.006612 | -1.01761 |
| RNF139    | -1.19064 | 0.332403 | -3.79894 | 0.001226 | 0.006736 | -1.018   |
| PTPN5     | 0.856159 | -0.46874 | 3.777471 | 0.001195 | 0.006614 | -1.01814 |
| KCTD7     | 0.642324 | -0.38483 | 3.777316 | 0.001195 | 0.006614 | -1.01848 |
| C16orf59  | 1.228808 | -0.39603 | 3.777223 | 0.001195 | 0.006614 | -1.01869 |
| GBA3      | 0.576734 | -0.66573 | 3.798536 | 0.001227 | 0.006738 | -1.01888 |
| IL18BP    | 0.614506 | -0.35402 | 3.77652  | 0.001197 | 0.006622 | -1.02025 |
| ACPP      | -2.09308 | 0.859392 | -3.7971  | 0.001231 | 0.006753 | -1.02201 |
| LOC338625 | 1.107395 | -0.42846 | 3.784427 | 0.001267 | 0.006888 | -1.02289 |
| UGT2B28   | 0.82221  | -0.34457 | 3.774519 | 0.001203 | 0.006648 | -1.0247  |
| PRKAB1    | -0.99919 | 0.644932 | -3.77431 | 0.001203 | 0.006649 | -1.02516 |
| SLC15A1   | 0.782842 | -0.35654 | 3.774014 | 0.001204 | 0.006652 | -1.02582 |
| TMEM130   | -0.92761 | 0.232807 | -3.77316 | 0.001207 | 0.006663 | -1.02772 |
| SLC31A1   | -2.04469 | 1.620353 | -3.77201 | 0.00121  | 0.006677 | -1.03026 |
| OSBP      | -0.75676 | 0.737707 | -3.77184 | 0.00121  | 0.006678 | -1.03064 |
| ADAM6     | -1.21639 | 0.192755 | -3.77042 | 0.001214 | 0.006698 | -1.03381 |
| ZBTB7C    | 0.914921 | -0.51973 | 3.770311 | 0.001215 | 0.006698 | -1.03405 |
| DUSP11    | -0.70337 | 0.211098 | -3.76975 | 0.001216 | 0.006703 | -1.03529 |
| PAPSS1    | -1.52256 | 0.811077 | -3.76878 | 0.001219 | 0.006717 | -1.03745 |
| ATL3      | -0.91363 | 0.411275 | -3.76824 | 0.00122  | 0.006721 | -1.03866 |
| LMBR1     | -1.17655 | 0.453373 | -3.7675  | 0.001223 | 0.006731 | -1.04029 |
| IGDCC3    | 0.62684  | -0.42779 | 3.767175 | 0.001223 | 0.006733 | -1.04102 |
| OR51B2    | -0.91163 | 0.190129 | -3.76703 | 0.001224 | 0.006733 | -1.04134 |
| TMEM11    | -0.57429 | 0.361059 | -3.76687 | 0.001224 | 0.006733 | -1.04168 |



|          |          |          |          |          |          |          |
|----------|----------|----------|----------|----------|----------|----------|
| BCL3     | -0.91927 | 0.664047 | -3.76687 | 0.001224 | 0.006733 | -1.04169 |
| DBC1     | -1.27218 | 0.257601 | -3.76651 | 0.001225 | 0.006736 | -1.04251 |
| TAS2R13  | 0.921317 | -0.56154 | 3.766163 | 0.001226 | 0.006738 | -1.04326 |
| FUT4     | -0.84871 | 0.765977 | -3.76578 | 0.001227 | 0.006741 | -1.04411 |
| HK1      | 0.841343 | -0.27177 | 3.765455 | 0.001228 | 0.006744 | -1.04484 |
| REG1B    | 0.960933 | -0.4949  | 3.76492  | 0.00123  | 0.00675  | -1.04603 |
| VPS35    | -0.83271 | 0.597914 | -3.76439 | 0.001231 | 0.006755 | -1.0472  |
| CENPB    | 0.942499 | -0.30736 | 3.764225 | 0.001232 | 0.006756 | -1.04757 |
| ADAMTS7  | -1.06876 | 0.548242 | -3.76341 | 0.001234 | 0.006766 | -1.04938 |
| KRT79    | 0.968265 | -0.25561 | 3.76325  | 0.001235 | 0.006766 | -1.04974 |
| ECRP     | -1.36959 | 0.791515 | -3.76319 | 0.001235 | 0.006766 | -1.04986 |
| KCNQ1DN  | 0.761001 | -0.34895 | 3.762992 | 0.001235 | 0.006768 | -1.05031 |
| C19orf51 | 0.962235 | -0.64073 | 3.762772 | 0.001236 | 0.006768 | -1.0508  |
| FAM19A4  | -2.13965 | 1.022882 | -3.76274 | 0.001236 | 0.006768 | -1.05087 |
| SSR1     | -1.29099 | 0.464756 | -3.7621  | 0.001238 | 0.006776 | -1.05228 |
| NCK2     | 0.880663 | -0.45188 | 3.761758 | 0.001239 | 0.006779 | -1.05305 |
| C11orf30 | -0.86214 | 0.823543 | -3.76159 | 0.001239 | 0.00678  | -1.05343 |
| CXCR3    | 1.443392 | -0.61587 | 3.761481 | 0.00124  | 0.00678  | -1.05367 |
| BBC3     | 1.126534 | -0.35831 | 3.761148 | 0.001241 | 0.006783 | -1.05441 |
| SLK      | -1.60075 | 0.776135 | -3.76066 | 0.001242 | 0.006789 | -1.05549 |
| ELOVL4   | 1.198377 | -0.68759 | 3.820004 | 0.001387 | 0.007347 | -1.0568  |
| C6       | 0.624712 | -0.39935 | 3.759876 | 0.001244 | 0.0068   | -1.05723 |
| SMURF1   | -0.80712 | 0.610208 | -3.7587  | 0.001248 | 0.006816 | -1.05985 |
| VSIG10L  | -1.23205 | 0.896704 | -3.75838 | 0.001249 | 0.00682  | -1.06057 |
| CASS4    | 0.814952 | -0.46996 | 3.757308 | 0.001252 | 0.006833 | -1.06294 |
| OLFM1    | 1.91981  | -1.05305 | 3.756661 | 0.001254 | 0.006841 | -1.06437 |
| LRRC37B  | -0.84292 | 0.597806 | -3.75656 | 0.001254 | 0.006841 | -1.06461 |
| ANKS1A   | -1.22104 | 0.483495 | -3.75631 | 0.001255 | 0.006843 | -1.06516 |
| APLP2    | -1.40071 | 1.095971 | -3.75596 | 0.001256 | 0.006847 | -1.06592 |
| ARSB     | -0.95884 | 0.657506 | -3.75514 | 0.001258 | 0.006858 | -1.06776 |
| MECP2    | -0.77151 | 0.813091 | -3.755   | 0.001259 | 0.006858 | -1.06805 |
| SVEP1    | -0.83957 | 0.172093 | -3.75472 | 0.001259 | 0.006861 | -1.06869 |
| ZAN      | 0.569581 | -0.48418 | 3.75446  | 0.00126  | 0.006861 | -1.06926 |
| LDOC1L   | 1.109248 | -0.56779 | 3.754454 | 0.00126  | 0.006861 | -1.06927 |
| FAM167B  | 0.444497 | -0.1816  | 3.753784 | 0.001262 | 0.006869 | -1.07076 |
| FAM131B  | 0.996147 | -0.47935 | 3.753703 | 0.001262 | 0.006869 | -1.07094 |
| ALMS1P   | 1.321031 | -0.5877  | 3.78591  | 0.001369 | 0.007277 | -1.07167 |
| CSRNP1   | -1.44337 | 1.437139 | -3.753   | 0.001264 | 0.006878 | -1.07249 |
| ATXN7L3  | -0.76865 | 0.555939 | -3.75207 | 0.001267 | 0.006889 | -1.07458 |
| CRIP1    | 1.337525 | -0.54603 | 3.751999 | 0.001267 | 0.006889 | -1.07473 |
| C11orf48 | -0.66805 | 0.422815 | -3.7515  | 0.001269 | 0.006895 | -1.07583 |
| C12orf49 | -0.76808 | 0.401744 | -3.75126 | 0.00127  | 0.006897 | -1.07636 |
| SLC2A3   | -2.08239 | 1.230055 | -3.74899 | 0.001276 | 0.006931 | -1.08141 |
| MGC11082 | -1.25292 | 0.895187 | -3.74892 | 0.001277 | 0.006931 | -1.08155 |
| PSMB3    | -0.7115  | 0.338545 | -3.74846 | 0.001278 | 0.006936 | -1.08258 |
| SIL1     | -0.86822 | 0.315894 | -3.74783 | 0.00128  | 0.006944 | -1.08398 |
| TP53I11  | -1.22011 | 1.001701 | -3.74773 | 0.00128  | 0.006944 | -1.08421 |

|          |          |          |          |          |          |          |
|----------|----------|----------|----------|----------|----------|----------|
| KIAA0100 | 0.448723 | -0.32099 | 3.747512 | 0.001281 | 0.006945 | -1.08469 |
| APOH     | -1.27788 | 0.372179 | -3.74739 | 0.001281 | 0.006945 | -1.08497 |
| ERI1     | -1.75567 | 0.958725 | -3.74731 | 0.001281 | 0.006945 | -1.08514 |
| ARSD     | -1.13926 | 0.746151 | -3.74661 | 0.001283 | 0.006954 | -1.0867  |
| SLC29A3  | 0.810166 | -0.29796 | 3.745707 | 0.001286 | 0.006966 | -1.0887  |
| DLGAP4   | -0.82355 | 0.663514 | -3.74563 | 0.001286 | 0.006966 | -1.08886 |
| ZBTB4    | 0.973628 | -0.34588 | 3.745144 | 0.001288 | 0.006972 | -1.08995 |
| LY6H     | 0.41213  | -0.08159 | 3.74419  | 0.001291 | 0.006986 | -1.09207 |
| LMX1B    | 0.600013 | -0.201   | 3.744028 | 0.001291 | 0.006986 | -1.09243 |
| WBP1     | -0.3521  | 0.337021 | -3.74395 | 0.001291 | 0.006986 | -1.09261 |
| CBLN1    | -1.21304 | 0.116693 | -3.76429 | 0.001326 | 0.007123 | -1.09342 |
| ANKRD23  | -0.79331 | 0.519478 | -3.74336 | 0.001293 | 0.006994 | -1.0939  |
| TFAP2C   | 0.823048 | -0.30571 | 3.763672 | 0.001328 | 0.007128 | -1.09477 |
| KLHL9    | -1.07901 | 0.57726  | -3.74296 | 0.001294 | 0.006998 | -1.0948  |
| IL36RN   | 1.969242 | -0.38173 | 3.818338 | 0.001534 | 0.007867 | -1.09494 |
| THOC4    | -0.64815 | 0.627559 | -3.74147 | 0.001299 | 0.007021 | -1.0981  |
| MTMR9    | -1.00315 | 0.448309 | -3.74126 | 0.001299 | 0.007022 | -1.09856 |
| PRM1     | 1.021756 | -0.43714 | 3.74074  | 0.001301 | 0.007025 | -1.09973 |
| RNF2     | -1.05152 | 0.43197  | -3.74021 | 0.001303 | 0.007031 | -1.1009  |
| PEG3     | -0.65192 | 0.03793  | -3.79839 | 0.001454 | 0.007575 | -1.1015  |
| BFSP1    | 1.186987 | -0.36275 | 3.739588 | 0.001305 | 0.00704  | -1.10228 |
| ZNF558   | -0.76052 | 0.122584 | -3.7389  | 0.001307 | 0.007049 | -1.10382 |
| B3GALT4  | -0.73545 | 0.34233  | -3.73832 | 0.001308 | 0.007057 | -1.1051  |
| DRAM2    | -0.9207  | 0.28826  | -3.73796 | 0.001309 | 0.007061 | -1.1059  |
| ANKLE2   | -0.71662 | 0.547407 | -3.73713 | 0.001312 | 0.007066 | -1.10774 |
| NAP1L5   | 0.859991 | -0.45545 | 3.737072 | 0.001312 | 0.007066 | -1.10787 |
| RASGRF2  | 1.337938 | -0.72967 | 3.737051 | 0.001312 | 0.007066 | -1.10791 |
| COPE     | -0.73759 | 0.722526 | -3.73704 | 0.001312 | 0.007066 | -1.10794 |
| UNC93A   | -0.67319 | 0.257191 | -3.73703 | 0.001312 | 0.007066 | -1.10796 |
| RAB2B    | 0.917227 | -0.42365 | 3.736773 | 0.001313 | 0.007068 | -1.10853 |
| LOC72798 | 1.232606 | -0.42694 | 3.735925 | 0.001316 | 0.007077 | -1.11041 |
| THAP6    | -1.07741 | 0.532074 | -3.73591 | 0.001316 | 0.007077 | -1.11045 |
| TDO2     | 1.589407 | -1.28255 | 3.80474  | 0.001434 | 0.00751  | -1.11062 |
| IMPA1    | -1.33779 | 0.181273 | -3.73582 | 0.001316 | 0.007077 | -1.11065 |
| ZMYND15  | -1.05932 | 0.569422 | -3.7358  | 0.001316 | 0.007077 | -1.11068 |
| ZFP36L1  | -0.63603 | 0.74039  | -3.73279 | 0.001325 | 0.007123 | -1.11736 |
| INPP4A   | -0.88032 | 0.735905 | -3.73277 | 0.001325 | 0.007123 | -1.11741 |
| DIP2A    | -0.75528 | 0.60898  | -3.73249 | 0.001326 | 0.007123 | -1.11803 |
| RUSC2    | 0.803821 | -0.24092 | 3.732091 | 0.001327 | 0.007128 | -1.11892 |
| PSMG2    | -0.54597 | 0.284422 | -3.73188 | 0.001328 | 0.007128 | -1.11938 |
| CDC34    | 1.169107 | -0.54737 | 3.731622 | 0.001329 | 0.007128 | -1.11996 |
| RBM22    | -0.43659 | 0.389584 | -3.73159 | 0.001329 | 0.007128 | -1.12003 |
| MTO1     | -0.67598 | 0.437082 | -3.73152 | 0.001329 | 0.007128 | -1.1202  |
| ESX1     | 1.217558 | -0.3806  | 3.751513 | 0.001365 | 0.007263 | -1.12122 |
| CBFA2T2  | 0.825447 | -0.2395  | 3.730704 | 0.001332 | 0.007139 | -1.122   |
| VPS54    | -2.0144  | 1.091624 | -3.7305  | 0.001332 | 0.00714  | -1.12246 |
| CTSF     | 1.349535 | -0.65933 | 3.730408 | 0.001333 | 0.00714  | -1.12266 |

|           |          |          |          |          |          |          |
|-----------|----------|----------|----------|----------|----------|----------|
| DGAT1     | -0.54639 | 0.275051 | -3.72987 | 0.001334 | 0.007147 | -1.12384 |
| ARSE      | 1.610926 | -0.39539 | 3.737375 | 0.00141  | 0.007426 | -1.12491 |
| LEPR      | -1.33229 | 0.266458 | -3.72922 | 0.001336 | 0.007156 | -1.12528 |
| HAND2     | 1.013517 | -0.41547 | 3.728672 | 0.001338 | 0.007161 | -1.12651 |
| RWDD3     | -0.80782 | 0.140607 | -3.72865 | 0.001338 | 0.007161 | -1.12656 |
| PRPF3     | -0.74492 | 0.601444 | -3.72855 | 0.001338 | 0.007161 | -1.12679 |
| BAG5      | -0.724   | 0.406309 | -3.7284  | 0.001339 | 0.007161 | -1.1271  |
| HSDL2     | -1.29577 | 0.59455  | -3.72837 | 0.001339 | 0.007161 | -1.12718 |
| IFNK      | 0.746187 | -0.24079 | 3.72804  | 0.00134  | 0.007164 | -1.12791 |
| ABI3      | 0.97828  | -0.31794 | 3.727741 | 0.001341 | 0.007167 | -1.12857 |
| LINC00314 | -1.77451 | 0.39229  | -3.727   | 0.001343 | 0.007177 | -1.13022 |
| PHOSPHO1  | 1.967708 | -0.36488 | 3.726803 | 0.001344 | 0.007177 | -1.13065 |
| OGDH      | -0.76303 | 0.808048 | -3.72667 | 0.001344 | 0.007177 | -1.13094 |
| PTGER2    | -1.04173 | 0.151452 | -3.72663 | 0.001344 | 0.007177 | -1.13103 |
| VWA5A     | -2.22447 | 1.311546 | -3.72656 | 0.001345 | 0.007177 | -1.13119 |
| KRTAP6-3  | 0.782724 | -0.63595 | 3.726113 | 0.001346 | 0.007182 | -1.13219 |
| LCE2D     | 0.60755  | -0.52077 | 3.726034 | 0.001346 | 0.007182 | -1.13236 |
| ROBO4     | 0.442066 | -0.33147 | 3.745247 | 0.001385 | 0.007341 | -1.13485 |
| MTX1      | -0.79535 | 0.566208 | -3.72459 | 0.001351 | 0.007204 | -1.13556 |
| CNIH2     | 0.846456 | -0.43562 | 3.724121 | 0.001352 | 0.00721  | -1.1366  |
| GPR75     | 0.604635 | -0.47375 | 3.723718 | 0.001354 | 0.007215 | -1.1375  |
| LGALS8-AS | -1.21706 | 0.700771 | -3.72333 | 0.001355 | 0.007219 | -1.13835 |
| TNNT2     | 0.912057 | -0.63048 | 3.742874 | 0.001392 | 0.007363 | -1.14001 |
| FBXL12    | -0.69399 | 0.554317 | -3.72215 | 0.001358 | 0.007235 | -1.14097 |
| APOC3     | 1.45413  | -0.51973 | 3.753093 | 0.001472 | 0.007646 | -1.14124 |
| EIF1AD    | -0.74211 | 0.718253 | -3.72175 | 0.00136  | 0.00724  | -1.14186 |
| PRLHR     | 0.846207 | -0.31035 | 3.721457 | 0.001361 | 0.007243 | -1.14251 |
| NPLOC4    | -0.76216 | 0.566424 | -3.72027 | 0.001364 | 0.007261 | -1.14516 |
| NCLN      | -0.96587 | 0.978704 | -3.71957 | 0.001367 | 0.007269 | -1.14669 |
| EDF1      | 0.766631 | -0.43046 | 3.718777 | 0.001369 | 0.007277 | -1.14846 |
| SLC22A1   | 1.230123 | -0.38014 | 3.718703 | 0.001369 | 0.007277 | -1.14862 |
| LOC40065! | 1.21931  | -0.32746 | 3.718592 | 0.00137  | 0.007277 | -1.14887 |
| POU2F3    | 1.308307 | -0.55148 | 3.718397 | 0.00137  | 0.007279 | -1.1493  |
| LOC28424! | 1.208951 | -0.49253 | 3.725174 | 0.001449 | 0.007559 | -1.15134 |
| HNRNPKP3  | -0.92197 | 0.182838 | -3.73735 | 0.00141  | 0.007426 | -1.15201 |
| SETD5     | -1.33921 | 0.993548 | -3.71671 | 0.001376 | 0.007305 | -1.15304 |
| STK38L    | -1.08799 | 0.792579 | -3.71585 | 0.001379 | 0.007315 | -1.15496 |
| C19orf12  | -1.14775 | 0.592558 | -3.71582 | 0.001379 | 0.007315 | -1.15501 |
| SIPA1L2   | -1.82849 | 1.614076 | -3.71581 | 0.001379 | 0.007315 | -1.15503 |
| CYP2S1    | 1.025942 | -0.34921 | 3.715202 | 0.001381 | 0.007323 | -1.15638 |
| NUDT19    | -0.76984 | 0.684641 | -3.71472 | 0.001382 | 0.007329 | -1.15746 |
| RFX4      | 0.869696 | -0.43085 | 3.713812 | 0.001385 | 0.007341 | -1.15947 |
| DENND4B   | -0.51137 | 0.394391 | -3.71343 | 0.001386 | 0.007345 | -1.16032 |
| ANGEL1    | 1.291349 | -0.33553 | 3.713078 | 0.001387 | 0.007347 | -1.16109 |
| LCN15     | 0.815029 | -0.42957 | 3.712697 | 0.001389 | 0.007352 | -1.16194 |
| AQP7      | 1.228492 | -0.70694 | 3.712243 | 0.00139  | 0.007358 | -1.16295 |
| CACNG5    | 0.91331  | -0.29704 | 3.711843 | 0.001391 | 0.007362 | -1.16383 |

|           |          |          |          |          |          |          |
|-----------|----------|----------|----------|----------|----------|----------|
| FOLR3     | -1.94473 | 1.131181 | -3.71172 | 0.001392 | 0.007363 | -1.16411 |
| USH1C     | 0.699979 | -0.49096 | 3.711489 | 0.001393 | 0.007363 | -1.16462 |
| GRIN2B    | -1.08355 | 0.167825 | -3.73133 | 0.001429 | 0.007494 | -1.1651  |
| ZDHHC6    | -0.90603 | 0.118337 | -3.71111 | 0.001394 | 0.007367 | -1.16547 |
| C22orf36  | -1.51705 | 1.111257 | -3.71094 | 0.001394 | 0.007368 | -1.16583 |
| GDPD2     | 0.888202 | -0.38462 | 3.710427 | 0.001396 | 0.007374 | -1.16697 |
| PDPN      | -0.85153 | 0.230892 | -3.71037 | 0.001396 | 0.007374 | -1.1671  |
| RMND5B    | -0.59461 | 0.387038 | -3.7101  | 0.001397 | 0.007376 | -1.16769 |
| HMX1      | 0.713734 | -0.41455 | 3.709355 | 0.001399 | 0.007387 | -1.16935 |
| KIAA0754  | -1.52533 | 0.608829 | -3.70877 | 0.001401 | 0.007395 | -1.17064 |
| LTBP4     | 0.963448 | -0.3132  | 3.707694 | 0.001405 | 0.007412 | -1.17303 |
| TMEM40    | 1.263311 | -0.50189 | 3.707316 | 0.001406 | 0.007416 | -1.17387 |
| PMEL      | 0.771053 | -0.44143 | 3.707008 | 0.001407 | 0.00742  | -1.17455 |
| SCAPER    | -0.70317 | 0.243576 | -3.70643 | 0.001409 | 0.007426 | -1.17583 |
| PELO      | -0.76522 | 0.489324 | -3.70626 | 0.00141  | 0.007426 | -1.1762  |
| FLJ25328  | 0.660008 | -0.254   | 3.789882 | 0.001628 | 0.008199 | -1.17895 |
| RNASE2    | -1.92156 | 1.09123  | -3.70479 | 0.001414 | 0.007447 | -1.17947 |
| AGFG1     | -1.47238 | 0.813468 | -3.70474 | 0.001415 | 0.007447 | -1.17959 |
| SGOL1     | -0.66913 | 0.362478 | -3.7044  | 0.001416 | 0.00745  | -1.18034 |
| IL26      | -1.2729  | 0.580022 | -3.70434 | 0.001416 | 0.00745  | -1.18046 |
| DOCK3     | 1.028764 | -0.5929  | 3.703969 | 0.001417 | 0.007454 | -1.18129 |
| PHC2      | -1.46829 | 1.012998 | -3.70374 | 0.001418 | 0.007456 | -1.1818  |
| EFNB1     | 0.817893 | -0.27995 | 3.703278 | 0.001419 | 0.007461 | -1.18282 |
| TRAPPC8   | -0.96474 | 0.291837 | -3.70324 | 0.001419 | 0.007461 | -1.18291 |
| CD320     | 0.805991 | -0.31371 | 3.702545 | 0.001422 | 0.007471 | -1.18445 |
| LOC100501 | -1.01309 | 0.917023 | -3.70238 | 0.001422 | 0.007472 | -1.18481 |
| PRR13     | -0.89145 | 0.623288 | -3.70194 | 0.001424 | 0.007477 | -1.18579 |
| AP4M1     | -0.52553 | 0.235236 | -3.70138 | 0.001426 | 0.007485 | -1.18703 |
| SLC17A5   | 1.250224 | -0.50849 | 3.700968 | 0.001427 | 0.007487 | -1.18794 |
| STK17A    | -0.77388 | 0.433573 | -3.70093 | 0.001427 | 0.007487 | -1.18802 |
| IL32      | 1.633319 | -0.85534 | 3.700891 | 0.001427 | 0.007487 | -1.18811 |
| CATSPER3  | 0.677724 | -0.0038  | 3.700418 | 0.001429 | 0.007494 | -1.18916 |
| PAK4      | 0.512357 | -0.37619 | 3.699751 | 0.001431 | 0.0075   | -1.19064 |
| TSGA10IP  | 0.52781  | -0.1821  | 3.699701 | 0.001431 | 0.0075   | -1.19075 |
| C2orf68   | -1.29498 | 0.959703 | -3.69833 | 0.001436 | 0.007514 | -1.19379 |
| GNAI3     | -1.30867 | 0.350634 | -3.69832 | 0.001436 | 0.007514 | -1.19382 |
| BLZF1     | -1.1203  | 0.454105 | -3.6983  | 0.001436 | 0.007514 | -1.19384 |
| SYTL1     | -0.49954 | 0.539271 | -3.69786 | 0.001437 | 0.007519 | -1.19483 |
| MUC13     | -1.01324 | 0.306355 | -3.6977  | 0.001438 | 0.007519 | -1.19519 |
| SELENBP1  | 2.301471 | -0.47513 | 3.697583 | 0.001438 | 0.007519 | -1.19544 |
| FKBP5     | -2.30494 | 1.09095  | -3.69757 | 0.001438 | 0.007519 | -1.19546 |
| TXNIP     | 0.919348 | -0.59092 | 3.697193 | 0.00144  | 0.007524 | -1.19631 |
| ZNF142    | 0.663754 | -0.31467 | 3.696453 | 0.001442 | 0.007535 | -1.19795 |
| APH1B     | -1.00387 | 0.295189 | -3.69556 | 0.001445 | 0.007548 | -1.19992 |
| AVL9      | -1.03713 | 0.564145 | -3.69535 | 0.001446 | 0.00755  | -1.2004  |
| LRG1      | -1.53795 | 0.958983 | -3.69459 | 0.001448 | 0.007559 | -1.20208 |
| NAIP      | -3.08154 | 2.112556 | -3.69446 | 0.001449 | 0.007559 | -1.20237 |

|           |          |          |          |          |          |          |
|-----------|----------|----------|----------|----------|----------|----------|
| LOC388796 | 1.548478 | -1.15834 | 3.694364 | 0.001449 | 0.007559 | -1.20258 |
| LOC100130 | -0.88892 | 0.70319  | -3.69432 | 0.001449 | 0.007559 | -1.20267 |
| MOP-1     | 1.107427 | -0.62846 | 3.694089 | 0.00145  | 0.00756  | -1.20318 |
| HOXD9     | 0.699142 | -0.54798 | 3.693284 | 0.001453 | 0.007572 | -1.20497 |
| RAB3IP    | -1.28897 | 0.921734 | -3.69259 | 0.001455 | 0.00758  | -1.2065  |
| TSNARE1   | 0.774027 | -0.17512 | 3.692029 | 0.001457 | 0.007588 | -1.20775 |
| PAGE2     | 1.681566 | -1.09853 | 3.691131 | 0.00146  | 0.007602 | -1.20974 |
| SLC7A2    | -0.84364 | 0.26343  | -3.69101 | 0.00146  | 0.007602 | -1.21    |
| LOC400897 | -1.40413 | 0.246407 | -3.69074 | 0.001461 | 0.007605 | -1.2106  |
| PSMD13    | -0.46817 | 0.085801 | -3.69019 | 0.001463 | 0.007613 | -1.21181 |
| RAI14     | 0.809784 | -0.44561 | 3.697057 | 0.001545 | 0.007906 | -1.21221 |
| GRWD1     | 0.992811 | -0.51347 | 3.688929 | 0.001467 | 0.007633 | -1.21462 |
| ADRBK1    | -0.7108  | 0.717037 | -3.68849 | 0.001469 | 0.007639 | -1.2156  |
| PECR      | -1.98885 | 0.922452 | -3.68832 | 0.00147  | 0.007639 | -1.21596 |
| KIAA2026  | -0.88982 | 0.503473 | -3.68824 | 0.00147  | 0.007639 | -1.21615 |
| FAM186B   | 0.963081 | -0.57027 | 3.687676 | 0.001472 | 0.007646 | -1.21739 |
| CNGB3     | 1.234856 | -0.26248 | 3.68727  | 0.001473 | 0.00765  | -1.21829 |
| FGF7      | -1.88042 | 0.571029 | -3.6865  | 0.001476 | 0.007662 | -1.21999 |
| TMUB2     | -0.76894 | 0.582178 | -3.68613 | 0.001477 | 0.007666 | -1.22082 |
| TMEM63B   | 0.689054 | -0.268   | 3.685661 | 0.001479 | 0.007673 | -1.22185 |
| ANKRA2    | -1.06513 | 0.276392 | -3.6853  | 0.00148  | 0.007677 | -1.22265 |
| FOLR2     | 0.96044  | -0.51177 | 3.684742 | 0.001482 | 0.007684 | -1.22389 |
| SHD       | 1.102394 | -0.45169 | 3.684701 | 0.001482 | 0.007684 | -1.22398 |
| CYP4Z2P   | -1.2623  | 0.144392 | -3.68391 | 0.001485 | 0.007696 | -1.22573 |
| POU6F1    | 0.870249 | -0.32037 | 3.689787 | 0.001571 | 0.007998 | -1.22794 |
| MYPOP     | -0.77195 | 0.915247 | -3.68265 | 0.001489 | 0.007715 | -1.22852 |
| GPR141    | -2.4646  | 1.42042  | -3.68259 | 0.001489 | 0.007715 | -1.22866 |
| SLC27A1   | 1.056571 | -0.40276 | 3.682299 | 0.00149  | 0.007719 | -1.2293  |
| LOC100657 | -1.13723 | 0.979097 | -3.68206 | 0.001491 | 0.007721 | -1.22982 |
| ADAM7     | 0.729687 | -0.59461 | 3.73585  | 0.001664 | 0.008325 | -1.23081 |
| SMARCD3   | -1.15192 | 0.65691  | -3.68153 | 0.001493 | 0.007728 | -1.23101 |
| ANAPC16   | -0.53833 | 0.124084 | -3.68123 | 0.001494 | 0.007732 | -1.23167 |
| YPEL4     | 1.008304 | -0.45784 | 3.680775 | 0.001495 | 0.007738 | -1.23267 |
| LOC220729 | -0.65479 | 0.287264 | -3.68005 | 0.001498 | 0.007747 | -1.23428 |
| HLA-DRB1  | 1.26002  | -0.64449 | 3.679966 | 0.001498 | 0.007747 | -1.23447 |
| SLC26A11  | -1.08157 | 0.470967 | -3.67991 | 0.001498 | 0.007747 | -1.23458 |
| GCKR      | -1.21711 | 0.917088 | -3.67949 | 0.0015   | 0.00775  | -1.23553 |
| C6orf141  | 0.758649 | -0.44117 | 3.679474 | 0.0015   | 0.00775  | -1.23556 |
| C7orf74   | -1.36351 | 1.249003 | -3.6794  | 0.0015   | 0.00775  | -1.23571 |
| PEX13     | -0.91414 | 0.608864 | -3.67828 | 0.001504 | 0.007766 | -1.2382  |
| ZNF254    | -0.92347 | 0.232255 | -3.6782  | 0.001504 | 0.007766 | -1.23838 |
| ZNF620    | -1.26604 | 0.462996 | -3.67819 | 0.001505 | 0.007766 | -1.23841 |
| MXI1      | 1.6783   | -1.32572 | 3.677926 | 0.001505 | 0.007768 | -1.23898 |
| PIGS      | -0.5193  | 0.52462  | -3.67785 | 0.001506 | 0.007768 | -1.23916 |
| DENND4C   | 0.546219 | -0.42963 | 3.677247 | 0.001508 | 0.007777 | -1.24049 |
| C21orf119 | -1.03292 | 0.481105 | -3.67684 | 0.001509 | 0.007782 | -1.2414  |
| GLIPR1L2  | -1.14714 | 0.210125 | -3.67664 | 0.00151  | 0.007784 | -1.24184 |

|          |          |          |          |          |          |          |
|----------|----------|----------|----------|----------|----------|----------|
| FAM47C   | 1.082922 | -0.68419 | 3.676323 | 0.001511 | 0.007785 | -1.24253 |
| PPARG    | -2.18039 | 1.153    | -3.67631 | 0.001511 | 0.007785 | -1.24256 |
| NAPG     | -0.91959 | 0.079375 | -3.6761  | 0.001512 | 0.007787 | -1.24302 |
| C2CD4C   | 0.891295 | -0.53299 | 3.675688 | 0.001513 | 0.007793 | -1.24394 |
| IL28A    | 0.875936 | -0.43963 | 3.675556 | 0.001514 | 0.007793 | -1.24423 |
| NRM      | -0.74972 | 0.616835 | -3.67534 | 0.001514 | 0.007795 | -1.24472 |
| TRIM46   | 0.822228 | -0.28642 | 3.675175 | 0.001515 | 0.007796 | -1.24507 |
| UCA1     | -0.57714 | 0.171949 | -3.67506 | 0.001515 | 0.007796 | -1.24533 |
| ZNF397   | -1.27125 | 0.878301 | -3.67475 | 0.001517 | 0.007799 | -1.24602 |
| DNA2     | -1.60938 | 0.635221 | -3.67452 | 0.001517 | 0.007801 | -1.24653 |
| TUBG1    | -0.78877 | 0.744291 | -3.67443 | 0.001518 | 0.007801 | -1.24672 |
| C12orf50 | -0.9907  | 0.346922 | -3.70308 | 0.001645 | 0.008259 | -1.24717 |
| DPEP2    | 1.062427 | -0.22778 | 3.673996 | 0.001519 | 0.007807 | -1.24768 |
| SUFU     | -0.67867 | 0.690898 | -3.67355 | 0.001521 | 0.007812 | -1.24868 |
| MEIG1    | 1.275395 | -0.20803 | 3.673464 | 0.001521 | 0.007812 | -1.24886 |
| KBTBD4   | -0.62896 | 0.427873 | -3.67315 | 0.001522 | 0.007816 | -1.24956 |
| TCTE1    | 0.612862 | -0.41549 | 3.672361 | 0.001525 | 0.007828 | -1.2513  |
| MUC2     | 0.677321 | -0.41608 | 3.671989 | 0.001526 | 0.007833 | -1.25213 |
| AP3B1    | -0.8505  | 0.522054 | -3.67181 | 0.001527 | 0.007834 | -1.25252 |
| CPSF3    | -0.59362 | 0.337984 | -3.68908 | 0.001573 | 0.008003 | -1.25688 |
| SCAMP5   | 0.866983 | -0.20714 | 3.669781 | 0.001534 | 0.007867 | -1.25701 |
| TMBIM1   | -1.0486  | 0.764864 | -3.66893 | 0.001537 | 0.007881 | -1.2589  |
| NSF      | -0.67098 | 0.234182 | -3.66859 | 0.001538 | 0.007885 | -1.25965 |
| IL17B    | 0.96288  | -0.7654  | 3.668358 | 0.001539 | 0.007887 | -1.26016 |
| LRRC72   | 0.987386 | -0.31852 | 3.674401 | 0.001627 | 0.008194 | -1.26122 |
| UBD      | -0.86186 | 0.059114 | -3.6677  | 0.001542 | 0.007895 | -1.26162 |
| TOP1     | -0.87124 | 0.720678 | -3.66769 | 0.001542 | 0.007895 | -1.26164 |
| NENF     | 0.771342 | -0.37107 | 3.667241 | 0.001543 | 0.007901 | -1.26264 |
| CPA4     | 0.793733 | -0.4186  | 3.666878 | 0.001545 | 0.007906 | -1.26344 |
| AGTPBP1  | -1.35122 | 0.453998 | -3.66654 | 0.001546 | 0.007908 | -1.26418 |
| CYLD     | -0.75591 | 0.367856 | -3.66632 | 0.001547 | 0.007908 | -1.26468 |
| PACSIN2  | -1.15425 | 0.600537 | -3.66616 | 0.001547 | 0.007908 | -1.26504 |
| SRPK1    | -1.34849 | 0.728807 | -3.66613 | 0.001547 | 0.007908 | -1.2651  |
| SPNS2    | -0.89952 | 0.923151 | -3.66606 | 0.001547 | 0.007908 | -1.26524 |
| PINK1    | 1.104023 | -0.51004 | 3.665969 | 0.001548 | 0.007908 | -1.26545 |
| B4GALT3  | 0.637373 | -0.26659 | 3.665547 | 0.001549 | 0.007914 | -1.26638 |
| IQSEC2   | 0.908138 | -0.43944 | 3.664984 | 0.001551 | 0.007922 | -1.26763 |
| HAUS2    | -1.04754 | 0.602517 | -3.66441 | 0.001553 | 0.00793  | -1.2689  |
| PELP1    | 0.542761 | -0.47458 | 3.663942 | 0.001555 | 0.007937 | -1.26993 |
| REL      | -0.92423 | 0.610823 | -3.66375 | 0.001556 | 0.007939 | -1.27037 |
| FAM55D   | 0.866072 | -0.1885  | 3.68189  | 0.001599 | 0.008097 | -1.27248 |
| FAM78B   | 1.164382 | -0.42621 | 3.668533 | 0.001649 | 0.008267 | -1.2739  |
| FAM65A   | 0.809081 | -0.32806 | 3.662129 | 0.001562 | 0.007966 | -1.27395 |
| AQP10    | 0.813468 | -0.50465 | 3.661072 | 0.001565 | 0.007982 | -1.27629 |
| PAQR4    | -1.00953 | 1.032675 | -3.66106 | 0.001566 | 0.007982 | -1.27632 |
| ZNF136   | -0.84627 | 0.357349 | -3.66088 | 0.001566 | 0.007983 | -1.2767  |
| CACNA2D3 | 1.855233 | -1.1062  | 3.66043  | 0.001568 | 0.007989 | -1.27771 |

|           |          |          |          |          |          |          |
|-----------|----------|----------|----------|----------|----------|----------|
| LOC10050! | -1.50891 | 1.382345 | -3.66031 | 0.001568 | 0.00799  | -1.27798 |
| TMEM14E   | 1.49327  | -0.62173 | 3.712739 | 0.00175  | 0.008607 | -1.27857 |
| SLC9A9    | -1.17621 | 0.482195 | -3.65998 | 0.001569 | 0.007994 | -1.27871 |
| TACR2     | 1.011777 | -0.6     | 3.659544 | 0.001571 | 0.007998 | -1.27967 |
| APOO      | -0.70889 | 0.279355 | -3.65908 | 0.001573 | 0.008003 | -1.2807  |
| DISC1     | -0.94666 | 0.544393 | -3.65891 | 0.001573 | 0.008003 | -1.28106 |
| CLDN4     | 1.188138 | -0.48618 | 3.657809 | 0.001577 | 0.008021 | -1.2835  |
| ZNF700    | -1.07837 | 0.569    | -3.65762 | 0.001578 | 0.008021 | -1.28393 |
| ZNF583    | -1.11103 | 0.370716 | -3.65753 | 0.001578 | 0.008021 | -1.28411 |
| NUPR1     | 0.815766 | -0.38969 | 3.657481 | 0.001579 | 0.008021 | -1.28423 |
| GYPA      | 0.765014 | -0.24109 | 3.657385 | 0.001579 | 0.008021 | -1.28444 |
| KAT2B     | 0.799536 | -0.34169 | 3.684881 | 0.001713 | 0.008479 | -1.28568 |
| C16orf7   | -0.85292 | 0.591723 | -3.656   | 0.001584 | 0.008043 | -1.28751 |
| PLEKHA1   | 1.021762 | -0.33779 | 3.65587  | 0.001584 | 0.008043 | -1.28779 |
| MGC39545  | -1.85773 | 0.456349 | -3.65587 | 0.001584 | 0.008043 | -1.2878  |
| ALOX12B   | 0.927588 | -0.38678 | 3.655783 | 0.001585 | 0.008043 | -1.28799 |
| PTGER1    | 0.45154  | -0.25665 | 3.655357 | 0.001586 | 0.008048 | -1.28893 |
| BHLHE23   | 0.838167 | -0.46754 | 3.655035 | 0.001588 | 0.008051 | -1.28964 |
| TFDP1     | -0.90225 | 0.527152 | -3.65501 | 0.001588 | 0.008051 | -1.28969 |
| ELK1      | -0.71336 | 0.567039 | -3.65387 | 0.001592 | 0.00807  | -1.29222 |
| SERP2     | 0.9754   | -0.52372 | 3.653513 | 0.001593 | 0.008075 | -1.29301 |
| ZNF585B   | -0.97218 | 0.502151 | -3.65337 | 0.001594 | 0.008075 | -1.29332 |
| TAS2R8    | -0.88529 | 0.063157 | -3.65231 | 0.001598 | 0.008092 | -1.29567 |
| BPIFB4    | 1.322968 | -0.54867 | 3.652242 | 0.001598 | 0.008092 | -1.29582 |
| SERPINH1  | 1.160808 | -0.45034 | 3.651384 | 0.001601 | 0.008104 | -1.29772 |
| VPS16     | -0.38258 | 0.168949 | -3.65117 | 0.001602 | 0.008106 | -1.29818 |
| ANKRD36B  | 1.359205 | -0.72143 | 3.657269 | 0.001691 | 0.008421 | -1.29825 |
| HS1BP3    | -1.39178 | 0.649644 | -3.65109 | 0.001602 | 0.008106 | -1.29838 |
| COL4A1    | -1.01429 | 0.082387 | -3.65095 | 0.001603 | 0.008106 | -1.29867 |
| FBLN2     | -0.59615 | 0.795938 | -3.65012 | 0.001606 | 0.008119 | -1.30051 |
| TMOD1     | 1.867983 | -0.8532  | 3.655417 | 0.001698 | 0.008446 | -1.30225 |
| LYNX1     | 0.799776 | -0.34557 | 3.649042 | 0.00161  | 0.008137 | -1.30289 |
| SIGLEC10  | -1.62814 | 0.816362 | -3.64886 | 0.00161  | 0.008137 | -1.30329 |
| SLC43A1   | 0.722645 | -0.19225 | 3.648817 | 0.001611 | 0.008137 | -1.30339 |
| SNAPC3    | -1.00542 | 0.425648 | -3.64876 | 0.001611 | 0.008137 | -1.30353 |
| SEMA3E    | -0.94217 | 0.171874 | -3.66702 | 0.001654 | 0.008287 | -1.30474 |
| SCARA3    | 1.049249 | -0.69662 | 3.648007 | 0.001614 | 0.008149 | -1.30518 |
| PIGC      | -0.55418 | 0.356743 | -3.64741 | 0.001616 | 0.008158 | -1.30649 |
| MAX       | -0.70141 | 0.599365 | -3.6471  | 0.001617 | 0.008162 | -1.30718 |
| SRSF12    | 0.617394 | -0.15257 | 3.686184 | 0.001708 | 0.008467 | -1.30835 |
| WBP4      | -1.27169 | 1.082475 | -3.64636 | 0.00162  | 0.008174 | -1.30882 |
| UPF2      | -0.84696 | 0.878807 | -3.64595 | 0.001621 | 0.008179 | -1.30973 |
| IRX1      | 0.649498 | -0.28394 | 3.645556 | 0.001623 | 0.008185 | -1.3106  |
| SLMO2     | -0.60069 | 0.343781 | -3.64542 | 0.001623 | 0.008185 | -1.31091 |
| NOL8      | -0.80619 | 0.621719 | -3.64506 | 0.001625 | 0.00819  | -1.3117  |
| GML       | 0.850531 | -0.41877 | 3.644834 | 0.001626 | 0.00819  | -1.3122  |
| RPL35A    | 1.693658 | -1.85376 | 3.644819 | 0.001626 | 0.00819  | -1.31223 |

|           |          |          |          |          |          |          |
|-----------|----------|----------|----------|----------|----------|----------|
| WDR27     | -0.9911  | 0.765907 | -3.64401 | 0.001629 | 0.008199 | -1.31402 |
| MAPK1     | -1.01886 | 0.63877  | -3.64367 | 0.00163  | 0.008203 | -1.31476 |
| LTBR      | -1.1814  | 0.926201 | -3.6436  | 0.00163  | 0.008203 | -1.31493 |
| SNAP23    | -1.13037 | 0.503317 | -3.64339 | 0.001631 | 0.008205 | -1.31538 |
| CECR6     | 1.192117 | -0.11748 | 3.642874 | 0.001633 | 0.008213 | -1.31653 |
| ERH       | -1.04576 | -0.12355 | -3.64221 | 0.001635 | 0.008223 | -1.318   |
| POLA2     | -0.60285 | 0.396944 | -3.6421  | 0.001636 | 0.008223 | -1.31825 |
| CRYGN     | 0.965015 | -0.4626  | 3.641166 | 0.001639 | 0.008239 | -1.32031 |
| KRT222    | -0.92243 | 0.056214 | -3.64017 | 0.001643 | 0.008256 | -1.32252 |
| ZER1      | 1.008607 | -0.40564 | 3.639828 | 0.001645 | 0.008259 | -1.32326 |
| PRKDC     | 1.153428 | -0.42439 | 3.639669 | 0.001645 | 0.008259 | -1.32361 |
| LOC100128 | -0.49104 | 0.221172 | -3.63944 | 0.001646 | 0.008261 | -1.32412 |
| LRSAM1    | -1.10388 | 0.88067  | -3.6392  | 0.001647 | 0.008264 | -1.32466 |
| ZFP3      | -0.95861 | 0.235328 | -3.63886 | 0.001648 | 0.008267 | -1.32541 |
| NDUFA9    | -0.79522 | 0.689786 | -3.63801 | 0.001651 | 0.00828  | -1.32728 |
| MICAL1    | -1.04463 | 0.556798 | -3.6376  | 0.001653 | 0.008286 | -1.32819 |
| NEU1      | -0.73556 | 0.416831 | -3.6374  | 0.001654 | 0.008287 | -1.32863 |
| CD5L      | -0.60407 | 0.045564 | -3.63696 | 0.001656 | 0.008292 | -1.3296  |
| KIF5A     | 1.38012  | -0.24708 | 3.636689 | 0.001657 | 0.008294 | -1.3302  |
| LMX1A     | 0.740557 | -0.44235 | 3.636618 | 0.001657 | 0.008294 | -1.33036 |
| KLF8      | -0.68177 | 0.7453   | -3.63628 | 0.001658 | 0.008299 | -1.33111 |
| VCPIP1    | -1.02739 | 0.408599 | -3.6354  | 0.001661 | 0.008313 | -1.33304 |
| DUSP6     | 1.287499 | -0.79317 | 3.634546 | 0.001665 | 0.008326 | -1.33494 |
| VIT       | 1.287201 | -0.39429 | 3.661513 | 0.001804 | 0.008792 | -1.3351  |
| ZSCAN30   | -1.00307 | 0.513475 | -3.63386 | 0.001667 | 0.008337 | -1.33646 |
| CEBPD     | -1.31165 | 0.945472 | -3.63335 | 0.001669 | 0.008343 | -1.33759 |
| DCAF4L2   | 0.833296 | -0.60235 | 3.633314 | 0.00167  | 0.008343 | -1.33766 |
| BAI2      | 0.648615 | -0.19456 | 3.632829 | 0.001671 | 0.00835  | -1.33873 |
| NIPA2     | -0.68859 | 0.149213 | -3.63218 | 0.001674 | 0.008361 | -1.34017 |
| ARL8B     | -1.26471 | 0.648376 | -3.63155 | 0.001676 | 0.008371 | -1.34156 |
| RAVER1    | -1.28224 | 1.13678  | -3.63086 | 0.001679 | 0.008382 | -1.34309 |
| ZNF572    | 1.03016  | -0.88746 | 3.630781 | 0.001679 | 0.008382 | -1.34326 |
| SERPINB3  | -0.49019 | -0.03239 | -3.63585 | 0.001776 | 0.0087   | -1.34452 |
| CXCL11    | -1.19629 | 0.144543 | -3.62966 | 0.001684 | 0.0084   | -1.34574 |
| IFFO2     | 1.1332   | -0.53937 | 3.629599 | 0.001684 | 0.0084   | -1.34587 |
| ABHD11    | -0.7739  | 0.450144 | -3.62917 | 0.001686 | 0.008407 | -1.34683 |
| TEKT3     | -1.07315 | 0.203999 | -3.64738 | 0.00173  | 0.008536 | -1.34732 |
| GABRE     | -0.48544 | 0.186354 | -3.62893 | 0.001687 | 0.008409 | -1.34734 |
| VILL      | -0.47934 | 0.407747 | -3.62864 | 0.001688 | 0.008413 | -1.34799 |
| LRBA      | 1.092901 | -0.83701 | 3.62844  | 0.001689 | 0.008414 | -1.34843 |
| LHX5      | 0.826515 | -0.39168 | 3.628266 | 0.001689 | 0.008416 | -1.34881 |
| CTBS      | -1.04557 | 0.353159 | -3.62783 | 0.001691 | 0.008421 | -1.34976 |
| FAM120AC  | -1.01037 | 0.929278 | -3.62727 | 0.001693 | 0.008429 | -1.351   |
| TMC3      | 0.900255 | -0.15434 | 3.626774 | 0.001695 | 0.008436 | -1.35211 |
| SLC22A4   | -1.8646  | 1.479511 | -3.62666 | 0.001696 | 0.008436 | -1.35235 |
| DNAJA1    | -1.26743 | 0.954813 | -3.62607 | 0.001698 | 0.008446 | -1.35367 |
| LOC28594  | 1.264161 | -0.46003 | 3.625834 | 0.001699 | 0.008446 | -1.35418 |



|           |          |          |          |          |          |          |
|-----------|----------|----------|----------|----------|----------|----------|
| MAGEL2    | 0.895083 | -0.50347 | 3.625196 | 0.001701 | 0.008456 | -1.35559 |
| BMF       | 0.685466 | -0.14508 | 3.624893 | 0.001702 | 0.008459 | -1.35626 |
| ZNF655    | -0.72225 | 0.112156 | -3.62475 | 0.001703 | 0.008459 | -1.35657 |
| ZFP28     | -1.14092 | 0.871774 | -3.62469 | 0.001703 | 0.008459 | -1.35671 |
| CCND3     | -1.48328 | 1.34024  | -3.62461 | 0.001704 | 0.008459 | -1.35689 |
| ALG2      | -0.58704 | 0.394038 | -3.62452 | 0.001704 | 0.008459 | -1.35709 |
| NDUFV1    | 0.681593 | -0.36247 | 3.624382 | 0.001705 | 0.008459 | -1.35739 |
| LOC151534 | 0.497789 | -0.23934 | 3.624264 | 0.001705 | 0.00846  | -1.35765 |
| BIRC2     | -1.26086 | 0.488476 | -3.62409 | 0.001706 | 0.008461 | -1.35803 |
| KPNA2     | -0.78035 | 0.461172 | -3.6237  | 0.001707 | 0.008466 | -1.35889 |
| AHNAK2    | 1.055183 | -0.25904 | 3.62309  | 0.00171  | 0.008474 | -1.36024 |
| IL6ST     | -1.49914 | 0.504793 | -3.62283 | 0.001711 | 0.008477 | -1.36081 |
| CAPZA1    | -1.73758 | 0.415726 | -3.62247 | 0.001712 | 0.008479 | -1.3616  |
| HIST1H4I  | -0.81929 | 0.453389 | -3.6223  | 0.001713 | 0.008479 | -1.36199 |
| EMP2      | -1.01553 | 0.25807  | -3.62229 | 0.001713 | 0.008479 | -1.36201 |
| H2AFB2    | -0.84482 | 0.551993 | -3.62204 | 0.001714 | 0.008482 | -1.36256 |
| UQCR10    | -0.71457 | 0.250322 | -3.62183 | 0.001715 | 0.008484 | -1.36302 |
| AVPI1     | 0.71626  | -0.19308 | 3.621395 | 0.001716 | 0.00849  | -1.36399 |
| RSPH4A    | -0.86347 | -0.0075  | -3.621   | 0.001718 | 0.008496 | -1.36485 |
| TSTA3     | 1.033413 | -0.58545 | 3.620831 | 0.001719 | 0.008497 | -1.36523 |
| CD59      | -2.27727 | 1.570361 | -3.6203  | 0.001721 | 0.008505 | -1.36641 |
| C6orf124  | 0.828774 | -0.33986 | 3.620215 | 0.001721 | 0.008505 | -1.36659 |
| STOML2    | 0.636501 | -0.52342 | 3.619635 | 0.001723 | 0.008514 | -1.36787 |
| DIRAS2    | -0.99353 | 0.250895 | -3.61903 | 0.001726 | 0.008522 | -1.36921 |
| DMD       | -1.28909 | 0.378708 | -3.61901 | 0.001726 | 0.008522 | -1.36925 |
| CST5      | 0.930747 | -0.31166 | 3.617964 | 0.00173  | 0.008536 | -1.37156 |
| SIGLEC5   | -1.60278 | 1.061538 | -3.61781 | 0.001731 | 0.008536 | -1.3719  |
| RTP1      | 1.070586 | -0.41131 | 3.617802 | 0.001731 | 0.008536 | -1.37192 |
| PVT1      | 0.802428 | -0.51831 | 3.617723 | 0.001731 | 0.008536 | -1.37209 |
| C2orf88   | 1.578163 | -0.77088 | 3.617664 | 0.001731 | 0.008536 | -1.37223 |
| GZF1      | -0.76526 | 0.318589 | -3.63553 | 0.001777 | 0.008704 | -1.37299 |
| DMTF1     | -1.02342 | 0.318685 | -3.61646 | 0.001736 | 0.008556 | -1.37489 |
| CXCL5     | 1.760729 | -0.95453 | 3.616361 | 0.001736 | 0.008556 | -1.3751  |
| INTS3     | -0.80685 | 0.704693 | -3.61634 | 0.001737 | 0.008556 | -1.37515 |
| IGFLR1    | -0.78594 | 0.3782   | -3.61447 | 0.001744 | 0.008589 | -1.37928 |
| YIF1A     | 0.758924 | -0.33519 | 3.614419 | 0.001744 | 0.008589 | -1.37939 |
| PROX1     | -0.95409 | 0.155189 | -3.61437 | 0.001745 | 0.008589 | -1.37951 |
| PPP2R3C   | -1.06749 | 0.517425 | -3.61414 | 0.001745 | 0.008591 | -1.38    |
| TRIM69    | -1.42049 | 0.936455 | -3.61374 | 0.001747 | 0.008597 | -1.38088 |
| BPGM      | 1.548982 | -0.60882 | 3.612356 | 0.001753 | 0.00862  | -1.38394 |
| RNF121    | -0.86507 | 0.195551 | -3.61173 | 0.001755 | 0.00863  | -1.38532 |
| TATDN3    | -0.8994  | 0.637909 | -3.61118 | 0.001757 | 0.008639 | -1.38654 |
| CARS      | -0.98184 | 0.533875 | -3.61098 | 0.001758 | 0.008641 | -1.38699 |
| LOC100506 | 1.101799 | -0.42787 | 3.686378 | 0.002024 | 0.00957  | -1.38714 |
| MBD2      | -0.5961  | 0.165487 | -3.6107  | 0.001759 | 0.008643 | -1.3876  |
| GZMH      | 2.146048 | -1.10534 | 3.610689 | 0.001759 | 0.008643 | -1.38762 |
| LOC349196 | -1.08936 | 0.172906 | -3.60977 | 0.001763 | 0.008659 | -1.38965 |

|           |          |          |          |          |          |          |
|-----------|----------|----------|----------|----------|----------|----------|
| C4orf3    | -0.97363 | 0.10235  | -3.60925 | 0.001765 | 0.008667 | -1.39079 |
| B3GAT1    | 1.5975   | -0.65824 | 3.60916  | 0.001766 | 0.008667 | -1.391   |
| KIF2C     | -0.99725 | 0.472852 | -3.60902 | 0.001766 | 0.008667 | -1.39131 |
| PTGIR     | 1.331143 | -0.29382 | 3.6086   | 0.001768 | 0.008674 | -1.39223 |
| FBXW7     | -0.68146 | 0.269963 | -3.60837 | 0.001769 | 0.008676 | -1.39275 |
| PI3       | 2.631465 | -1.49161 | 3.608023 | 0.00177  | 0.008681 | -1.39351 |
| PPP3CB    | -0.62514 | -0.11374 | -3.60779 | 0.001771 | 0.008683 | -1.39402 |
| UBE2V2    | 0.986519 | -0.216   | 3.607603 | 0.001772 | 0.008685 | -1.39444 |
| RPS11     | 1.446179 | -1.10496 | 3.606138 | 0.001778 | 0.008708 | -1.39767 |
| MLXIP     | -1.37269 | 1.140189 | -3.60587 | 0.001779 | 0.008711 | -1.39827 |
| PRR7      | -0.85024 | 1.003003 | -3.6049  | 0.001783 | 0.008727 | -1.40041 |
| LY6G5B    | -0.69011 | 0.453509 | -3.60485 | 0.001783 | 0.008727 | -1.40051 |
| C1RL      | -1.8018  | 0.796938 | -3.60446 | 0.001785 | 0.008733 | -1.40136 |
| SSTR5     | 0.933849 | -0.49448 | 3.604236 | 0.001786 | 0.008735 | -1.40187 |
| PARD6G    | 0.654063 | -0.47554 | 3.6038   | 0.001788 | 0.008742 | -1.40283 |
| CHGA      | 0.792186 | -0.51394 | 3.603682 | 0.001788 | 0.008742 | -1.40309 |
| CMYA5     | -0.78933 | 0.131637 | -3.6208  | 0.001837 | 0.008913 | -1.40489 |
| PTK2B     | -0.86192 | 0.870421 | -3.60286 | 0.001792 | 0.008757 | -1.40491 |
| LOC44245  | 1.154787 | -0.46232 | 3.602734 | 0.001792 | 0.008757 | -1.40518 |
| U2AF1L4   | -0.71721 | 0.639124 | -3.60257 | 0.001793 | 0.008758 | -1.40554 |
| MIR22HG   | -1.10199 | 0.415039 | -3.60228 | 0.001794 | 0.008761 | -1.40619 |
| RRNAD1    | -0.54861 | 0.531028 | -3.60224 | 0.001794 | 0.008761 | -1.40628 |
| HBM       | 2.772871 | -1.29973 | 3.601962 | 0.001795 | 0.008764 | -1.40688 |
| GPR146    | 2.05043  | -0.66312 | 3.601754 | 0.001796 | 0.008766 | -1.40734 |
| TMEM182   | -1.06275 | 0.01698  | -3.60154 | 0.001797 | 0.008768 | -1.40781 |
| FAM92B    | 1.316888 | -0.48208 | 3.601394 | 0.001798 | 0.008769 | -1.40813 |
| WDR19     | -0.6481  | 0.385401 | -3.60059 | 0.001801 | 0.008783 | -1.40991 |
| PFN1P2    | 0.946209 | -0.51279 | 3.600376 | 0.001802 | 0.008785 | -1.41038 |
| DIRC2     | -1.34429 | 0.686097 | -3.59938 | 0.001806 | 0.008801 | -1.41258 |
| S100A11   | -1.22905 | 1.067762 | -3.59903 | 0.001808 | 0.008806 | -1.41335 |
| LRP2      | 0.976493 | -0.231   | 3.603767 | 0.00191  | 0.009173 | -1.41373 |
| SPAG5     | -1.28044 | 1.180366 | -3.59874 | 0.001809 | 0.00881  | -1.41398 |
| COMMD2    | -1.09184 | 0.326785 | -3.61622 | 0.001856 | 0.008982 | -1.4148  |
| RTTN      | 1.046082 | -0.15626 | 3.603256 | 0.001912 | 0.009181 | -1.41484 |
| ZNF839    | -1.06966 | 0.864398 | -3.59818 | 0.001811 | 0.008817 | -1.41521 |
| DOCK11    | -0.87341 | 0.233922 | -3.59818 | 0.001811 | 0.008817 | -1.41522 |
| C14orf162 | 0.795911 | -0.44071 | 3.597774 | 0.001813 | 0.008823 | -1.41612 |
| DPP7      | 0.687448 | -0.25713 | 3.597515 | 0.001814 | 0.008826 | -1.41669 |
| MCTP1     | -2.02564 | 1.318728 | -3.59701 | 0.001816 | 0.008834 | -1.4178  |
| ELMOD3    | -0.46233 | 0.266919 | -3.59689 | 0.001817 | 0.008835 | -1.41807 |
| LINGO2    | 1.088086 | -0.82256 | 3.596378 | 0.001819 | 0.008843 | -1.4192  |
| ALG14     | -1.14572 | 0.342107 | -3.60102 | 0.001922 | 0.00921  | -1.41967 |
| USP33     | -1.76995 | 1.044447 | -3.59601 | 0.00182  | 0.008848 | -1.42001 |
| ACOT7     | -1.27238 | 1.276665 | -3.59461 | 0.001826 | 0.008874 | -1.42311 |
| TNRC6A    | -1.16165 | 1.011731 | -3.59452 | 0.001827 | 0.008874 | -1.42329 |
| PRAMEF10  | -1.09501 | 0.185513 | -3.59861 | 0.001932 | 0.009245 | -1.42484 |
| DHRS13    | -1.11127 | 0.85331  | -3.59379 | 0.00183  | 0.008887 | -1.4249  |

|           |          |          |          |          |          |          |
|-----------|----------|----------|----------|----------|----------|----------|
| REEP5     | -1.07883 | 0.755898 | -3.59329 | 0.001832 | 0.008895 | -1.426   |
| ZNF133    | -0.69424 | 0.503322 | -3.59297 | 0.001833 | 0.0089   | -1.42671 |
| ACR       | 0.848716 | -0.39665 | 3.592688 | 0.001834 | 0.008903 | -1.42734 |
| CCDC70    | 0.801557 | -0.21565 | 3.592354 | 0.001836 | 0.008908 | -1.42807 |
| VPS53     | -1.38077 | 1.148837 | -3.59151 | 0.001839 | 0.008921 | -1.42995 |
| RP9       | -0.70304 | 0.573146 | -3.59099 | 0.001842 | 0.00893  | -1.43108 |
| PSTK      | 1.435405 | -0.06815 | 3.59012  | 0.001845 | 0.008945 | -1.433   |
| NLRP11    | 0.591477 | -0.21802 | 3.607404 | 0.001894 | 0.009111 | -1.43389 |
| AK4       | -1.02843 | 0.940501 | -3.58948 | 0.001848 | 0.008956 | -1.4344  |
| RPGRIP1   | 1.356615 | -0.51    | 3.588819 | 0.001851 | 0.008968 | -1.43587 |
| C10orf137 | -0.86707 | 0.519665 | -3.58858 | 0.001852 | 0.008971 | -1.4364  |
| MED12L    | -1.01161 | 0.453955 | -3.58816 | 0.001854 | 0.008975 | -1.43731 |
| MMP23B    | 1.097136 | -0.28299 | 3.588158 | 0.001854 | 0.008975 | -1.43733 |
| IL17RE    | 0.822972 | -0.49981 | 3.587746 | 0.001856 | 0.008981 | -1.43823 |
| AFP       | 1.227287 | -0.32976 | 3.592256 | 0.00196  | 0.009349 | -1.43855 |
| HYI       | 0.838351 | -0.11676 | 3.587475 | 0.001857 | 0.008982 | -1.43883 |
| FRK       | -0.79341 | 0.145653 | -3.58739 | 0.001857 | 0.008982 | -1.43902 |
| EIF2C3    | -0.81434 | 0.817002 | -3.58637 | 0.001861 | 0.009001 | -1.44126 |
| RLTPR     | 0.879117 | -0.50988 | 3.586032 | 0.001863 | 0.009006 | -1.44201 |
| ACAD8     | -0.60794 | 0.289052 | -3.58527 | 0.001866 | 0.009018 | -1.44369 |
| LOC72917  | 0.645804 | -0.45201 | 3.585247 | 0.001866 | 0.009018 | -1.44374 |
| GRIN3B    | 0.71629  | -0.42745 | 3.584702 | 0.001869 | 0.009027 | -1.44494 |
| WDR5B     | -1.27488 | 0.379412 | -3.58444 | 0.00187  | 0.00903  | -1.44551 |
| RAB37     | 0.798809 | -0.38431 | 3.583637 | 0.001873 | 0.009043 | -1.44729 |
| C5orf51   | 0.510875 | -0.77814 | 3.583617 | 0.001873 | 0.009043 | -1.44734 |
| PEX26     | 0.81987  | -0.66411 | 3.583277 | 0.001875 | 0.009048 | -1.44809 |
| SF1       | -1.49112 | 1.182114 | -3.583   | 0.001876 | 0.00905  | -1.44869 |
| NKX6-3    | 0.729229 | -0.29957 | 3.582951 | 0.001876 | 0.00905  | -1.4488  |
| TMEM167   | -0.88528 | 0.213871 | -3.58286 | 0.001877 | 0.00905  | -1.449   |
| KATNB1    | -0.66537 | 0.525257 | -3.58273 | 0.001877 | 0.009051 | -1.4493  |
| LMNA      | 1.337932 | -0.29332 | 3.58145  | 0.001883 | 0.009075 | -1.45211 |
| EXOC7     | -0.7275  | 0.716481 | -3.58125 | 0.001884 | 0.009076 | -1.45255 |
| LOC72908  | -0.74963 | 0.105692 | -3.58109 | 0.001884 | 0.009076 | -1.4529  |
| SLC6A9    | 1.701044 | -0.37904 | 3.581094 | 0.001884 | 0.009076 | -1.4529  |
| CAV3      | -0.71068 | 0.385387 | -3.58078 | 0.001886 | 0.00908  | -1.4536  |
| FER1L6-AS | 0.9175   | -0.38794 | 3.580058 | 0.001889 | 0.009093 | -1.45518 |
| ALOX15    | 1.439343 | -0.17368 | 3.579638 | 0.001891 | 0.0091   | -1.45611 |
| EXPH5     | 0.510162 | -0.52495 | 3.579339 | 0.001892 | 0.009104 | -1.45676 |
| SIRPB1    | -1.05337 | 0.939726 | -3.57845 | 0.001896 | 0.009118 | -1.45872 |
| CNBD1     | 1.298506 | -0.65462 | 3.787261 | 0.00264  | 0.011657 | -1.45928 |
| RBKS      | -0.8948  | 0.297888 | -3.57784 | 0.001899 | 0.009129 | -1.46007 |
| ARHGDI    | -0.9977  | 1.191918 | -3.57757 | 0.0019   | 0.009132 | -1.46066 |
| COPZ2     | 1.440283 | -0.36924 | 3.616531 | 0.002344 | 0.010683 | -1.46215 |
| RNF187    | 0.952747 | -0.54383 | 3.576824 | 0.001903 | 0.009144 | -1.46231 |
| VWA3A     | 0.827963 | -0.65782 | 3.576816 | 0.001903 | 0.009144 | -1.46232 |
| NDUFAB1   | -0.72884 | 0.428174 | -3.57476 | 0.001912 | 0.009181 | -1.46685 |
| GCM1      | 0.864992 | -0.44256 | 3.574492 | 0.001913 | 0.009184 | -1.46744 |

|           |          |          |          |          |          |          |
|-----------|----------|----------|----------|----------|----------|----------|
| CALU      | -0.42368 | 0.473587 | -3.57378 | 0.001916 | 0.009197 | -1.46901 |
| ZNF76     | -0.93466 | 0.857267 | -3.57334 | 0.001918 | 0.009203 | -1.46997 |
| PARP9     | -1.63581 | 0.932141 | -3.57329 | 0.001919 | 0.009203 | -1.4701  |
| HARS2     | -0.41787 | 0.230534 | -3.5732  | 0.001919 | 0.009203 | -1.47029 |
| TYMS      | -1.63153 | 1.484764 | -3.57307 | 0.00192  | 0.009203 | -1.47057 |
| RPS6KA1   | -0.80029 | 0.641855 | -3.57211 | 0.001924 | 0.009219 | -1.47269 |
| TRAPPC3   | -0.49277 | 0.050606 | -3.57175 | 0.001926 | 0.009225 | -1.47349 |
| PIEZO2    | -0.42394 | 0.065045 | -3.57158 | 0.001926 | 0.009226 | -1.47386 |
| GH2       | -0.74802 | 0.213215 | -3.57143 | 0.001927 | 0.009227 | -1.47419 |
| CDYL2     | -1.01294 | 0.835952 | -3.57109 | 0.001928 | 0.009232 | -1.47494 |
| GMPPA     | -0.73066 | 0.662399 | -3.57055 | 0.001931 | 0.009241 | -1.47612 |
| C2orf76   | -1.45841 | 0.712956 | -3.58786 | 0.00198  | 0.009415 | -1.47615 |
| PHAX      | -1.0575  | 0.79565  | -3.57016 | 0.001933 | 0.009245 | -1.47699 |
| CNOT4     | -0.9878  | 0.685647 | -3.56936 | 0.001936 | 0.00926  | -1.47875 |
| RARRES1   | -0.52749 | 0.067472 | -3.58645 | 0.001986 | 0.009436 | -1.47921 |
| PEX11B    | -0.7592  | 0.175536 | -3.56892 | 0.001938 | 0.009267 | -1.47972 |
| KCNJ4     | 1.178494 | -0.09102 | 3.586108 | 0.001988 | 0.009441 | -1.47994 |
| MUC1      | -1.33711 | 0.621203 | -3.56862 | 0.00194  | 0.009271 | -1.48038 |
| LOC100133 | 0.793731 | -0.27837 | 3.568245 | 0.001941 | 0.009277 | -1.4812  |
| SLC4A3    | 1.236327 | -0.8673  | 3.592015 | 0.002104 | 0.009839 | -1.48189 |
| LOC100616 | 0.947747 | -0.17703 | 3.567856 | 0.001943 | 0.009283 | -1.48206 |
| CYYR1     | -1.28645 | 0.25729  | -3.56774 | 0.001943 | 0.009283 | -1.48232 |
| RIPK1     | -0.6833  | 0.445737 | -3.56581 | 0.001952 | 0.009322 | -1.48657 |
| CLEC5A    | -2.83099 | 1.224272 | -3.56576 | 0.001952 | 0.009322 | -1.48668 |
| FAM57B    | 0.796673 | -0.38721 | 3.565571 | 0.001953 | 0.009323 | -1.48709 |
| ZNF140    | -1.1159  | 0.358341 | -3.56529 | 0.001955 | 0.009327 | -1.48772 |
| TSNAXIP1  | 1.468683 | -0.48595 | 3.569028 | 0.002066 | 0.009708 | -1.48859 |
| STX10     | -0.94335 | 0.700394 | -3.56443 | 0.001958 | 0.009343 | -1.4896  |
| MYBPC3    | -0.70564 | 0.446761 | -3.56374 | 0.001962 | 0.009354 | -1.49113 |
| C6orf15   | 0.973448 | -0.26564 | 3.666843 | 0.002576 | 0.011446 | -1.49157 |
| MAEL      | -0.91755 | 0.301435 | -3.56323 | 0.001964 | 0.009361 | -1.49226 |
| C10orf82  | 1.432175 | -0.21061 | 3.563176 | 0.001964 | 0.009361 | -1.49237 |
| PDS5B     | -0.69321 | 0.451686 | -3.56269 | 0.001966 | 0.00937  | -1.49344 |
| BUB3      | -0.4803  | 0.454582 | -3.56246 | 0.001967 | 0.009372 | -1.49394 |
| ZMYM2     | -0.95169 | 0.279243 | -3.56172 | 0.001971 | 0.009386 | -1.49557 |
| AP1S1     | -1.20757 | 1.03249  | -3.56099 | 0.001974 | 0.0094   | -1.49719 |
| ZMYM6NB   | -0.49511 | 0.377843 | -3.56021 | 0.001978 | 0.009414 | -1.4989  |
| ACPT      | 0.586989 | -0.38107 | 3.560026 | 0.001978 | 0.009414 | -1.4993  |
| RASA1     | -0.68052 | -0.05359 | -3.56001 | 0.001979 | 0.009414 | -1.49934 |
| GPS2      | -0.73367 | 0.700473 | -3.55991 | 0.001979 | 0.009414 | -1.49955 |
| SLC25A35  | -0.51597 | 0.498368 | -3.55945 | 0.001981 | 0.00942  | -1.50057 |
| MYCT1     | 1.274299 | -0.42508 | 3.559339 | 0.001982 | 0.00942  | -1.50081 |
| OR13C4    | 0.743108 | -0.3899  | 3.559033 | 0.001983 | 0.009424 | -1.50149 |
| BAZ1A     | -1.36261 | 0.506275 | -3.55767 | 0.001989 | 0.009447 | -1.50449 |
| ANP32A    | -0.73264 | 0.678426 | -3.55756 | 0.00199  | 0.009447 | -1.50474 |
| DKFZP434F | -1.02887 | 0.85043  | -3.5566  | 0.001994 | 0.009466 | -1.50684 |
| LOC100501 | 1.308932 | -0.68228 | 3.560418 | 0.002107 | 0.009848 | -1.50712 |

|           |          |          |          |          |          |          |
|-----------|----------|----------|----------|----------|----------|----------|
| PLA2G7    | 1.694169 | -0.89043 | 3.58675  | 0.002298 | 0.010526 | -1.50724 |
| GTPBP4    | -0.74624 | 0.639846 | -3.55587 | 0.001998 | 0.009478 | -1.50846 |
| DDX23     | -0.44103 | 0.327358 | -3.55583 | 0.001998 | 0.009478 | -1.50853 |
| ANKRD13B  | 0.850504 | -0.17034 | 3.572577 | 0.00205  | 0.009649 | -1.50918 |
| TTY1      | 0.984637 | -0.34515 | 3.559098 | 0.002113 | 0.00987  | -1.50996 |
| FAR2      | -1.55252 | 0.881192 | -3.55449 | 0.002004 | 0.009505 | -1.51149 |
| UBXN7     | 0.878465 | -0.27199 | 3.553932 | 0.002007 | 0.009515 | -1.51271 |
| IFNA4     | -1.08949 | 0.164694 | -3.55337 | 0.002009 | 0.009525 | -1.51396 |
| TST       | 0.813956 | -0.2111  | 3.553181 | 0.00201  | 0.009527 | -1.51437 |
| ARHGEF26  | 0.887865 | -0.35057 | 3.552859 | 0.002012 | 0.009531 | -1.51508 |
| MGC27345  | 0.613282 | -0.41919 | 3.552797 | 0.002012 | 0.009531 | -1.51521 |
| KIAA1324  | 1.819122 | -0.62446 | 3.654144 | 0.002642 | 0.011657 | -1.51529 |
| LOC255480 | 0.815083 | -0.32448 | 3.552508 | 0.002013 | 0.009535 | -1.51585 |
| ZNF92     | -0.89947 | 0.285736 | -3.55192 | 0.002016 | 0.009544 | -1.51714 |
| ZC3H13    | -0.90009 | 0.65917  | -3.55181 | 0.002016 | 0.009544 | -1.51739 |
| HS3ST2    | -0.92284 | 0.236865 | -3.5517  | 0.002017 | 0.009544 | -1.51762 |
| CD300C    | -1.06285 | 0.848416 | -3.55169 | 0.002017 | 0.009544 | -1.51764 |
| MS4A1     | -1.18135 | 1.195167 | -3.55145 | 0.002018 | 0.009547 | -1.51819 |
| ATP5SL    | -0.71677 | 0.674074 | -3.55106 | 0.00202  | 0.009553 | -1.51904 |
| HMCN1     | -0.63315 | 0.23299  | -3.55005 | 0.002025 | 0.009571 | -1.52126 |
| DTX3L     | -1.27825 | 0.998433 | -3.54961 | 0.002027 | 0.009578 | -1.52222 |
| LINC00263 | 0.82629  | -0.23775 | 3.549398 | 0.002028 | 0.009581 | -1.52269 |
| FFAR2     | -0.97438 | 0.555596 | -3.54925 | 0.002028 | 0.009582 | -1.52302 |
| CSTF3     | -0.90024 | 0.525687 | -3.54914 | 0.002029 | 0.009582 | -1.52325 |
| PYGO2     | 0.553757 | -0.2854  | 3.548944 | 0.00203  | 0.009584 | -1.52369 |
| TMEM1061  | -1.00077 | 0.343551 | -3.57096 | 0.002205 | 0.010188 | -1.52628 |
| FOXM1     | -0.97671 | 0.63445  | -3.54726 | 0.002038 | 0.009619 | -1.5274  |
| ETFDH     | -0.83395 | 0.416466 | -3.54696 | 0.002039 | 0.009623 | -1.52806 |
| CEP152    | -1.29053 | 0.807499 | -3.54678 | 0.00204  | 0.009623 | -1.52846 |
| CAMKK2    | -0.97013 | 0.827782 | -3.54676 | 0.00204  | 0.009623 | -1.5285  |
| HSPBAP1   | -0.95695 | 0.445208 | -3.54645 | 0.002042 | 0.009628 | -1.52918 |
| APBA1     | 0.820342 | -0.3165  | 3.546325 | 0.002042 | 0.009628 | -1.52945 |
| UFL1      | -1.08512 | 0.198678 | -3.54595 | 0.002044 | 0.009634 | -1.53028 |
| SCGB1C1   | 1.398027 | -0.24307 | 3.545744 | 0.002045 | 0.009636 | -1.53073 |
| PTHLH     | 0.832734 | -0.43109 | 3.545278 | 0.002047 | 0.009642 | -1.53175 |
| RFC3      | 0.843352 | -0.32317 | 3.545191 | 0.002048 | 0.009642 | -1.53194 |
| COX3      | 1.064458 | -0.57077 | 3.545191 | 0.002048 | 0.009642 | -1.53194 |
| RBM18     | -0.61388 | 0.290984 | -3.54464 | 0.00205  | 0.00965  | -1.53316 |
| C4orf32   | -1.722   | 0.919628 | -3.54441 | 0.002051 | 0.009651 | -1.53366 |
| MORF4L1   | -0.90636 | 0.61103  | -3.54438 | 0.002051 | 0.009651 | -1.53373 |
| ZC3H11A   | -1.30704 | 0.923829 | -3.54404 | 0.002053 | 0.009656 | -1.53447 |
| NAP1L4    | -0.73054 | 0.559776 | -3.54345 | 0.002056 | 0.009667 | -1.53578 |
| C6orf170  | -1.17316 | 0.301841 | -3.54701 | 0.002172 | 0.010072 | -1.53596 |
| FLJ45248  | -1.01169 | 0.640495 | -3.54304 | 0.002058 | 0.009674 | -1.53668 |
| AKR1B1    | 0.911292 | -0.40251 | 3.542903 | 0.002058 | 0.009674 | -1.53698 |
| RUNX1T1   | -0.43877 | 0.131004 | -3.54106 | 0.002067 | 0.009711 | -1.54103 |
| WBP2      | -1.34491 | 1.161925 | -3.54083 | 0.002068 | 0.009713 | -1.54153 |

|           |          |          |          |          |          |          |
|-----------|----------|----------|----------|----------|----------|----------|
| PPDPF     | 1.157471 | -0.66719 | 3.540784 | 0.002069 | 0.009713 | -1.54164 |
| LOC100501 | 0.821512 | -0.15261 | 3.540362 | 0.002071 | 0.009719 | -1.54257 |
| PRDM6     | 0.810495 | -0.32403 | 3.540286 | 0.002071 | 0.009719 | -1.54273 |
| POLR2J4   | -1.04717 | 1.02131  | -3.53996 | 0.002072 | 0.009724 | -1.54344 |
| LOC100128 | -1.00742 | 0.861805 | -3.5393  | 0.002076 | 0.009737 | -1.54491 |
| ANKRD33B  | -1.41635 | 0.848297 | -3.53908 | 0.002077 | 0.009739 | -1.54539 |
| ST6GALNA  | 1.394125 | -0.29678 | 3.538944 | 0.002077 | 0.00974  | -1.54568 |
| PDE3A     | 1.350407 | -0.23707 | 3.538342 | 0.00208  | 0.009749 | -1.54701 |
| KIAA0930  | -2.01994 | 0.978219 | -3.53832 | 0.00208  | 0.009749 | -1.54706 |
| C19orf70  | 0.860953 | -0.71447 | 3.536697 | 0.002088 | 0.009784 | -1.55062 |
| TMEM38B   | -0.77665 | 0.195667 | -3.5359  | 0.002092 | 0.009798 | -1.55237 |
| LOC100130 | -0.55093 | 0.022271 | -3.53587 | 0.002092 | 0.009798 | -1.55244 |
| C5orf50   | 0.566065 | -0.26388 | 3.535607 | 0.002093 | 0.009801 | -1.55302 |
| CYP26B1   | 2.225174 | -0.92792 | 3.535117 | 0.002096 | 0.00981  | -1.5541  |
| EDEM1     | -0.67947 | 0.136054 | -3.53469 | 0.002098 | 0.009818 | -1.55504 |
| PLEKHM3   | -0.86633 | 0.461397 | -3.53455 | 0.002099 | 0.009818 | -1.55534 |
| DPEP1     | 0.826873 | -0.35663 | 3.533757 | 0.002102 | 0.009833 | -1.55709 |
| SLC4A5    | 0.71042  | -0.36366 | 3.533701 | 0.002103 | 0.009833 | -1.55721 |
| FCN3      | 0.931026 | -0.41461 | 3.53221  | 0.00211  | 0.009858 | -1.56049 |
| LINC00113 | -1.00263 | 0.200526 | -3.5322  | 0.00211  | 0.009858 | -1.5605  |
| C7orf25   | -1.26264 | 0.932473 | -3.53085 | 0.002117 | 0.009884 | -1.56349 |
| CREB3L2   | -0.98201 | 0.605927 | -3.5307  | 0.002117 | 0.009885 | -1.5638  |
| PTPN4     | 0.843926 | -0.31817 | 3.529559 | 0.002123 | 0.009909 | -1.56631 |
| METTL6    | -0.76071 | 0.283382 | -3.52922 | 0.002125 | 0.009914 | -1.56706 |
| SLC9A3R2  | 0.921274 | -0.24876 | 3.528683 | 0.002127 | 0.009924 | -1.56824 |
| MGC16025  | 0.807629 | -0.33349 | 3.52855  | 0.002128 | 0.009924 | -1.56853 |
| SH2D2A    | 1.078441 | -0.36157 | 3.528462 | 0.002128 | 0.009924 | -1.56873 |
| SEMA5A    | -1.20306 | 0.101177 | -3.52764 | 0.002132 | 0.009939 | -1.57052 |
| LTBP1     | 0.744355 | -0.18808 | 3.527602 | 0.002133 | 0.009939 | -1.57061 |
| ZKSCAN5   | -0.8698  | 0.672012 | -3.5269  | 0.002136 | 0.009952 | -1.57216 |
| FUT9      | 0.716701 | -0.18926 | 3.526865 | 0.002136 | 0.009952 | -1.57223 |
| LINC00085 | -1.15818 | 0.646216 | -3.52642 | 0.002138 | 0.009959 | -1.57322 |
| FDPS      | -0.53511 | 0.224185 | -3.52607 | 0.00214  | 0.009965 | -1.57398 |
| SEC14L1   | 1.022322 | -0.48749 | 3.525884 | 0.002141 | 0.009965 | -1.57439 |
| KLHL33    | 1.294485 | -0.49319 | 3.525868 | 0.002141 | 0.009965 | -1.57442 |
| C1orf122  | -0.83673 | 0.460756 | -3.52539 | 0.002143 | 0.009974 | -1.57548 |
| LOC55420  | 0.896471 | -0.32055 | 3.524323 | 0.002149 | 0.009996 | -1.57782 |
| ICAM2     | 1.274157 | -0.35422 | 3.523918 | 0.002151 | 0.010003 | -1.57871 |
| SSTR3     | 0.734949 | -0.46358 | 3.522844 | 0.002156 | 0.010025 | -1.58107 |
| DVL3      | -0.8337  | 0.659746 | -3.52255 | 0.002158 | 0.01003  | -1.58172 |
| LPHN1     | 1.134827 | -0.57085 | 3.52181  | 0.002161 | 0.010045 | -1.58334 |
| ANKRD2    | 0.521328 | -0.3017  | 3.521261 | 0.002164 | 0.010055 | -1.58455 |
| GCK       | 0.811664 | -0.51479 | 3.524345 | 0.002286 | 0.010481 | -1.58469 |
| TMEM69    | -0.42453 | -0.01837 | -3.52103 | 0.002165 | 0.010057 | -1.58506 |
| SNRPD1    | -1.22527 | 1.046194 | -3.52097 | 0.002165 | 0.010057 | -1.58518 |
| WNT10B    | 0.73176  | -0.35125 | 3.520824 | 0.002166 | 0.010057 | -1.5855  |
| ATP6V0A2  | -0.55312 | 0.207548 | -3.52077 | 0.002166 | 0.010057 | -1.58562 |

|           |          |          |          |          |          |          |
|-----------|----------|----------|----------|----------|----------|----------|
| SNX6      | -1.06572 | 0.380103 | -3.52023 | 0.002169 | 0.010067 | -1.5868  |
| CHD9      | -0.9569  | 0.574527 | -3.52001 | 0.00217  | 0.01007  | -1.5873  |
| KTN1      | -1.01812 | 0.183232 | -3.51987 | 0.002171 | 0.010071 | -1.5876  |
| CYP2E1    | 0.789077 | -0.36494 | 3.51939  | 0.002173 | 0.010077 | -1.58865 |
| LRRK1     | -0.57656 | 0.452639 | -3.51925 | 0.002174 | 0.010078 | -1.58897 |
| GBP2      | -1.5768  | 0.946465 | -3.51794 | 0.002181 | 0.010106 | -1.59184 |
| NIP7      | -0.67529 | 0.51868  | -3.51736 | 0.002184 | 0.010117 | -1.59311 |
| PPIP5K2   | -1.1114  | -0.00679 | -3.51703 | 0.002185 | 0.01012  | -1.59384 |
| EMB       | -1.10533 | 0.113174 | -3.51701 | 0.002185 | 0.01012  | -1.59387 |
| ATG10     | -1.31332 | 0.692698 | -3.53314 | 0.002241 | 0.010318 | -1.5943  |
| BRP44L    | -0.53515 | -0.04124 | -3.51628 | 0.002189 | 0.010134 | -1.59549 |
| IBA57     | 0.647437 | -0.21384 | 3.516205 | 0.002189 | 0.010134 | -1.59565 |
| LOC100506 | -0.83256 | 0.670759 | -3.51612 | 0.00219  | 0.010134 | -1.59583 |
| CENPE     | -0.97069 | 0.346242 | -3.516   | 0.00219  | 0.010135 | -1.59611 |
| INSL6     | 0.659869 | -0.29816 | 3.515071 | 0.002195 | 0.010154 | -1.59814 |
| TIPIN     | -1.22056 | 0.568955 | -3.51411 | 0.0022   | 0.010174 | -1.60026 |
| MASP2     | 0.803931 | -0.45701 | 3.513898 | 0.002201 | 0.010177 | -1.60071 |
| PALMD     | 0.728749 | -0.54659 | 3.513784 | 0.002202 | 0.010177 | -1.60097 |
| SGPL1     | -0.65099 | 0.387115 | -3.5135  | 0.002203 | 0.010181 | -1.60159 |
| PCDHGA8   | 0.689274 | -0.53367 | 3.512721 | 0.002207 | 0.010194 | -1.6033  |
| GIN1      | -1.37776 | -0.03572 | -3.51568 | 0.002332 | 0.010647 | -1.60331 |
| LOC100133 | -1.0333  | 0.211196 | -3.51261 | 0.002208 | 0.010194 | -1.60354 |
| RBMS1     | -1.28198 | 0.560146 | -3.51255 | 0.002208 | 0.010194 | -1.60368 |
| SMOC1     | 0.688462 | -0.46523 | 3.512287 | 0.002209 | 0.010196 | -1.60425 |
| CDC42BPB  | 0.656056 | -0.26043 | 3.512247 | 0.00221  | 0.010196 | -1.60434 |
| MATN4     | 0.641748 | -0.44145 | 3.51216  | 0.00221  | 0.010196 | -1.60453 |
| RGN       | 0.956163 | -0.35473 | 3.514243 | 0.002339 | 0.010672 | -1.60639 |
| RNF17     | -1.1481  | 0.207929 | -3.53262 | 0.002401 | 0.010891 | -1.60705 |
| FLRT2     | -1.11511 | 0.257873 | -3.51366 | 0.002342 | 0.010676 | -1.60763 |
| LCT       | 0.590787 | -0.50531 | 3.510536 | 0.002218 | 0.010232 | -1.6081  |
| DSG1      | 1.877456 | -0.27473 | 3.513113 | 0.002345 | 0.010684 | -1.60881 |
| CDCA2     | -1.54652 | 1.313229 | -3.50922 | 0.002225 | 0.010261 | -1.61098 |
| ARF1      | -0.83496 | 0.844572 | -3.5087  | 0.002228 | 0.010271 | -1.61212 |
| COPS8     | -0.73629 | 0.188012 | -3.50798 | 0.002231 | 0.010285 | -1.61371 |
| HOPX      | 0.922113 | -0.69249 | 3.507389 | 0.002234 | 0.010297 | -1.615   |
| DENR      | -1.08168 | 0.852884 | -3.50729 | 0.002235 | 0.010297 | -1.61522 |
| GABRQ     | 0.746374 | -0.18853 | 3.507116 | 0.002236 | 0.010299 | -1.6156  |
| LOC100505 | 0.511627 | -0.45764 | 3.506211 | 0.002241 | 0.010318 | -1.61759 |
| NPY       | 0.476132 | -0.49461 | 3.505885 | 0.002242 | 0.010321 | -1.6183  |
| ZDHHC19   | 0.868524 | -0.37627 | 3.505598 | 0.002244 | 0.010323 | -1.61893 |
| KIAA0125  | -0.8986  | 0.805828 | -3.50557 | 0.002244 | 0.010323 | -1.619   |
| GNMT      | -0.7724  | 0.472911 | -3.50531 | 0.002245 | 0.010327 | -1.61957 |
| FEV       | 0.615178 | -0.35924 | 3.504458 | 0.00225  | 0.010345 | -1.62144 |
| C3AR1     | -1.50451 | 0.720919 | -3.50421 | 0.002251 | 0.010348 | -1.62198 |
| LIPE      | 0.892491 | -0.39988 | 3.50413  | 0.002251 | 0.010348 | -1.62216 |
| CTBP2     | -1.04088 | 0.917323 | -3.50255 | 0.00226  | 0.010383 | -1.62562 |
| TFAP2A    | -0.77901 | 0.182792 | -3.50163 | 0.002264 | 0.010402 | -1.62764 |

|           |          |          |          |          |          |          |
|-----------|----------|----------|----------|----------|----------|----------|
| SMAD6     | 0.595604 | -0.1345  | 3.50158  | 0.002265 | 0.010402 | -1.62775 |
| INTS5     | -0.73356 | 0.757619 | -3.50119 | 0.002267 | 0.010409 | -1.62862 |
| PEX14     | -0.60922 | 0.567276 | -3.50031 | 0.002271 | 0.010424 | -1.63054 |
| HPRT1     | -0.83209 | 0.334273 | -3.50029 | 0.002271 | 0.010424 | -1.63058 |
| LOC100125 | 0.571706 | -0.35726 | 3.500253 | 0.002272 | 0.010424 | -1.63066 |
| FLJ35424  | -1.11326 | 0.240733 | -3.51621 | 0.002329 | 0.010636 | -1.6308  |
| TMEM132I  | -0.9933  | 0.252465 | -3.53375 | 0.002395 | 0.010871 | -1.63114 |
| COL4A4    | -0.75696 | -0.02938 | -3.52111 | 0.002463 | 0.011082 | -1.63126 |
| PRDM15    | 0.745923 | -0.30713 | 3.499781 | 0.002274 | 0.010433 | -1.6317  |
| FCHSD2    | -1.00233 | 0.708462 | -3.49846 | 0.002281 | 0.010462 | -1.6346  |
| METTTL21D | -1.16169 | 0.51199  | -3.49791 | 0.002284 | 0.010473 | -1.6358  |
| CCDC166   | 0.664435 | -0.50861 | 3.497397 | 0.002287 | 0.010481 | -1.63693 |
| ATP11C    | -1.19039 | 0.39921  | -3.49692 | 0.002289 | 0.01049  | -1.63797 |
| C8orf83   | -1.1799  | 0.341959 | -3.51136 | 0.002354 | 0.010714 | -1.64124 |
| ANKRD62   | -0.89761 | 0.143323 | -3.51104 | 0.002356 | 0.010716 | -1.64192 |
| ARL10     | 0.789232 | -0.29633 | 3.559519 | 0.002643 | 0.011657 | -1.64202 |
| FABP5     | -0.88637 | 0.543399 | -3.49443 | 0.002302 | 0.010545 | -1.64344 |
| DNMT3A    | -0.69843 | 0.564653 | -3.49411 | 0.002304 | 0.010549 | -1.64414 |
| ABLM1     | 1.554145 | -0.92846 | 3.493994 | 0.002305 | 0.010549 | -1.64439 |
| CLCNKB    | 0.727287 | -0.52132 | 3.493974 | 0.002305 | 0.010549 | -1.64444 |
| GNG10     | -1.63507 | 0.040298 | -3.49374 | 0.002306 | 0.010552 | -1.64494 |
| TNFSF13B  | -1.3606  | 0.602483 | -3.49354 | 0.002307 | 0.010555 | -1.64539 |
| ABCB11    | -0.64345 | 0.241655 | -3.49303 | 0.00231  | 0.010565 | -1.6465  |
| ADAP1     | -0.85674 | 0.760541 | -3.49269 | 0.002312 | 0.01057  | -1.64726 |
| C1orf174  | 0.565938 | -0.53019 | 3.492471 | 0.002313 | 0.010571 | -1.64773 |
| C12orf11  | -1.06743 | 0.568204 | -3.49246 | 0.002313 | 0.010571 | -1.64774 |
| SHCBP1L   | 1.157825 | -0.36141 | 3.496148 | 0.002602 | 0.011536 | -1.64958 |
| MYH14     | 0.682831 | -0.53353 | 3.491365 | 0.002319 | 0.010595 | -1.65016 |
| LOC100505 | 1.094887 | -0.30881 | 3.493555 | 0.002451 | 0.011055 | -1.65079 |
| AHNAK     | 1.024456 | -0.48675 | 3.490591 | 0.002323 | 0.010612 | -1.65185 |
| LOC100125 | 1.31734  | -1.07594 | 3.49522  | 0.0028   | 0.0121   | -1.65437 |
| LOC100505 | -0.87791 | 0.591918 | -3.48887 | 0.002332 | 0.010647 | -1.65562 |
| C2orf51   | 0.66409  | -0.59381 | 3.488376 | 0.002335 | 0.010656 | -1.65671 |
| ADD1      | -0.74543 | 0.574319 | -3.48752 | 0.002339 | 0.010672 | -1.65859 |
| MGAM      | -1.94079 | 1.067498 | -3.48732 | 0.00234  | 0.010675 | -1.65902 |
| RPL10L    | 1.0753   | -0.7687  | 3.486986 | 0.002342 | 0.010676 | -1.65976 |
| C17orf70  | -0.70927 | 0.729647 | -3.48696 | 0.002342 | 0.010676 | -1.6598  |
| OTOP2     | 1.018354 | -0.35832 | 3.485642 | 0.00235  | 0.010701 | -1.6627  |
| ZNF845    | -1.22873 | 0.255051 | -3.48551 | 0.00235  | 0.010702 | -1.663   |
| LRRC48    | 0.648366 | -0.11276 | 3.485242 | 0.002352 | 0.010706 | -1.66358 |
| EFHB      | -1.11006 | 0.179112 | -3.48475 | 0.002354 | 0.010714 | -1.66465 |
| SLC10A4   | -1.02049 | 0.119207 | -3.48452 | 0.002356 | 0.010716 | -1.66516 |
| MID2      | 0.774622 | -0.52414 | 3.626282 | 0.003122 | 0.013135 | -1.66605 |
| PIK3R5    | -0.92424 | 0.882693 | -3.48214 | 0.002369 | 0.010771 | -1.67037 |
| BTBD3     | -1.44769 | 0.790803 | -3.48198 | 0.00237  | 0.010771 | -1.67074 |
| CCDC159   | -0.91453 | 0.648964 | -3.48192 | 0.00237  | 0.010771 | -1.67086 |
| PTCRA     | 1.3586   | -0.35594 | 3.480964 | 0.002375 | 0.010792 | -1.67295 |



|           |          |          |          |          |          |          |
|-----------|----------|----------|----------|----------|----------|----------|
| LOC100501 | 0.970523 | -0.82735 | 3.496415 | 0.002435 | 0.011021 | -1.67342 |
| CASR      | 1.456645 | -0.63102 | 3.48257  | 0.002513 | 0.011241 | -1.67434 |
| PLA2G16   | 0.853283 | -0.25908 | 3.480144 | 0.00238  | 0.01081  | -1.67475 |
| LOC100130 | 0.730373 | -0.38532 | 3.479326 | 0.002384 | 0.010828 | -1.67654 |
| C11orf74  | 1.932731 | -0.37124 | 3.508289 | 0.002944 | 0.012565 | -1.67693 |
| ASB4      | 0.827361 | -0.58536 | 3.477882 | 0.002392 | 0.010862 | -1.67971 |
| SS18      | -0.92273 | 0.165947 | -3.4768  | 0.002398 | 0.010882 | -1.68208 |
| STAC2     | 0.692985 | -0.3588  | 3.476763 | 0.002398 | 0.010882 | -1.68216 |
| CEP135    | -0.9598  | 0.368439 | -3.47546 | 0.002405 | 0.01091  | -1.68501 |
| KIAA1045  | 1.873747 | -0.68435 | 3.507139 | 0.00254  | 0.011334 | -1.68729 |
| MRPS10    | -0.81484 | 0.164582 | -3.47412 | 0.002413 | 0.010941 | -1.68796 |
| IKBK      | -0.51712 | 0.455713 | -3.47398 | 0.002414 | 0.010942 | -1.68826 |
| CENPM     | -1.15383 | 0.980193 | -3.47383 | 0.002414 | 0.010944 | -1.68858 |
| ANXA2P1   | -0.93335 | 0.77267  | -3.47354 | 0.002416 | 0.010947 | -1.68921 |
| SIGIRR    | 0.852692 | -0.1879  | 3.47349  | 0.002416 | 0.010947 | -1.68933 |
| TPTE      | -0.88474 | 0.158918 | -3.47266 | 0.002421 | 0.010966 | -1.69114 |
| C1orf52   | -0.91181 | 0.574379 | -3.47251 | 0.002422 | 0.010967 | -1.69148 |
| MYL4      | 0.674152 | -0.36902 | 3.472376 | 0.002423 | 0.010968 | -1.69177 |
| MRPL42P5  | -1.10145 | 0.545908 | -3.48695 | 0.002488 | 0.011164 | -1.69378 |
| SLC23A2   | -0.71582 | 0.477392 | -3.4708  | 0.002431 | 0.011005 | -1.69522 |
| PEAR1     | 0.789236 | -0.47213 | 3.469906 | 0.002436 | 0.011023 | -1.69718 |
| C1orf172  | 1.08751  | -0.48713 | 3.485367 | 0.002497 | 0.011202 | -1.69719 |
| LACC1     | 0.727304 | -0.27747 | 3.469578 | 0.002438 | 0.011029 | -1.6979  |
| RBMS3     | -0.76588 | 0.185941 | -3.48926 | 0.002642 | 0.011657 | -1.69824 |
| WASH1     | -0.39252 | 0.227591 | -3.46938 | 0.002439 | 0.011031 | -1.69833 |
| CLIC3     | 1.407725 | -0.14485 | 3.468969 | 0.002442 | 0.011038 | -1.69923 |
| SNX15     | -0.9214  | 0.780001 | -3.46872 | 0.002443 | 0.011038 | -1.69979 |
| NUP50     | -0.82137 | 0.517359 | -3.46862 | 0.002444 | 0.011038 | -1.7     |
| MTNR1A    | -0.74429 | 0.17593  | -3.46848 | 0.002444 | 0.011038 | -1.7003  |
| GTF3C2    | -0.68177 | 0.648541 | -3.46848 | 0.002444 | 0.011038 | -1.7003  |
| UPB1      | -1.03421 | 0.33146  | -3.46842 | 0.002445 | 0.011038 | -1.70042 |
| MUDENG    | -0.87405 | 0.093327 | -3.46838 | 0.002445 | 0.011038 | -1.70052 |
| SPINK5    | 0.803239 | -0.35813 | 3.468296 | 0.002445 | 0.011038 | -1.7007  |
| ZBTB39    | 0.90129  | -0.23767 | 3.467895 | 0.002448 | 0.011046 | -1.70158 |
| TNIP3     | -1.39619 | 0.656204 | -3.46736 | 0.002451 | 0.011055 | -1.70275 |
| CCDC18    | -1.53119 | 0.593156 | -3.46723 | 0.002452 | 0.011055 | -1.70305 |
| MTHFS     | -0.82684 | 0.282696 | -3.46689 | 0.002453 | 0.011059 | -1.70378 |
| LOC100501 | 0.964134 | -0.76863 | 3.466887 | 0.002453 | 0.011059 | -1.70379 |
| SF3A2     | 0.816083 | -0.25876 | 3.466496 | 0.002456 | 0.011063 | -1.70464 |
| NUDT22    | -0.55365 | 0.336824 | -3.46649 | 0.002456 | 0.011063 | -1.70466 |
| TAP2      | -0.91339 | 0.360795 | -3.46639 | 0.002456 | 0.011063 | -1.70488 |
| TMEM175   | 0.599359 | -0.37694 | 3.46629  | 0.002457 | 0.011063 | -1.7051  |
| GJC2      | 0.899859 | -0.26586 | 3.466184 | 0.002457 | 0.011063 | -1.70533 |
| NXNL1     | 0.845842 | -0.4453  | 3.466132 | 0.002458 | 0.011063 | -1.70544 |
| BRMS1     | -0.49859 | 0.447054 | -3.4651  | 0.002464 | 0.011084 | -1.7077  |
| LINC00307 | 0.770109 | -0.38006 | 3.464071 | 0.002469 | 0.011108 | -1.70995 |
| TBC1D5    | -0.72628 | 0.844307 | -3.46366 | 0.002472 | 0.011116 | -1.71084 |

|           |          |          |          |          |          |          |
|-----------|----------|----------|----------|----------|----------|----------|
| LOC493754 | -0.48172 | 0.217826 | -3.46344 | 0.002473 | 0.011119 | -1.71133 |
| LOC100134 | 0.692961 | -0.58676 | 3.46329  | 0.002474 | 0.01112  | -1.71166 |
| ADAM22    | 0.863271 | -0.25412 | 3.463214 | 0.002474 | 0.01112  | -1.71183 |
| PLEKHA3   | -1.04552 | 0.584227 | -3.46252 | 0.002478 | 0.011133 | -1.71335 |
| SPP2      | 0.789768 | -0.30376 | 3.462512 | 0.002478 | 0.011133 | -1.71337 |
| SFT2D3    | -0.96349 | 0.451968 | -3.46175 | 0.002483 | 0.01115  | -1.71504 |
| S1PR4     | -0.5232  | 0.592582 | -3.46146 | 0.002484 | 0.011154 | -1.71566 |
| DNAJC3    | -1.1653  | 0.727649 | -3.46123 | 0.002486 | 0.011158 | -1.71617 |
| C21orf56  | 1.022204 | -0.21841 | 3.460965 | 0.002487 | 0.011162 | -1.71675 |
| JAKMIP1   | 1.543718 | -0.39242 | 3.47947  | 0.0027   | 0.011815 | -1.7188  |
| SSX3      | 0.893546 | -0.52033 | 3.459043 | 0.002498 | 0.011204 | -1.72096 |
| PARN      | -0.95772 | 0.872044 | -3.45872 | 0.0025   | 0.01121  | -1.72167 |
| PPY       | 0.69299  | -0.31712 | 3.45832  | 0.002502 | 0.011218 | -1.72254 |
| C6orf168  | -0.84131 | 0.220903 | -3.47325 | 0.002567 | 0.011419 | -1.72325 |
| EHD2      | 1.071153 | -0.27601 | 3.457306 | 0.002508 | 0.011241 | -1.72476 |
| ZNF638    | -1.69135 | 0.999838 | -3.47641 | 0.002719 | 0.011872 | -1.72522 |
| NDEL1     | -0.90798 | 0.612806 | -3.45701 | 0.00251  | 0.011241 | -1.72541 |
| VN1R1     | -0.77342 | 0.088801 | -3.45697 | 0.00251  | 0.011241 | -1.72549 |
| XYLT2     | 0.733849 | -0.21868 | 3.456791 | 0.002511 | 0.011241 | -1.72588 |
| SCN4A     | -0.69221 | 0.252852 | -3.45672 | 0.002512 | 0.011241 | -1.72603 |
| LECT2     | -0.79595 | 0.201351 | -3.45665 | 0.002512 | 0.011241 | -1.7262  |
| TLR8      | -1.96313 | 0.805948 | -3.45648 | 0.002513 | 0.011241 | -1.72657 |
| MAP4K1    | 0.875001 | -0.24198 | 3.456433 | 0.002513 | 0.011241 | -1.72667 |
| OSCAR     | -1.4009  | 0.855713 | -3.45643 | 0.002513 | 0.011241 | -1.72668 |
| DYNC2LI1  | 1.090236 | -0.24808 | 3.455793 | 0.002517 | 0.011255 | -1.72807 |
| MYO10     | -2.17998 | 1.46036  | -3.4555  | 0.002519 | 0.01126  | -1.72872 |
| HRH1      | 1.23886  | -0.39739 | 3.457059 | 0.002662 | 0.011706 | -1.729   |
| STK35     | -1.21835 | 1.181237 | -3.45518 | 0.002521 | 0.011266 | -1.72941 |
| ZNF274    | -0.77819 | 0.482826 | -3.45483 | 0.002523 | 0.011272 | -1.73018 |
| CENPBD1   | -1.05444 | 0.835872 | -3.45395 | 0.002528 | 0.011289 | -1.7321  |
| BEST2     | 1.001562 | -0.30574 | 3.453889 | 0.002528 | 0.011289 | -1.73223 |
| SLC25A46  | -0.94685 | 0.192616 | -3.45387 | 0.002528 | 0.011289 | -1.73228 |
| ZNF208    | -0.85963 | -0.08965 | -3.46876 | 0.002593 | 0.011504 | -1.7329  |
| SERTAD3   | -0.76007 | 0.437293 | -3.45354 | 0.00253  | 0.011295 | -1.73299 |
| TECR      | 0.644866 | -0.1639  | 3.453319 | 0.002531 | 0.011299 | -1.73348 |
| LOC100283 | 0.825682 | -0.16298 | 3.453386 | 0.002684 | 0.011777 | -1.73686 |
| SRGAP1    | 0.672862 | -0.33876 | 3.451147 | 0.002544 | 0.01135  | -1.73823 |
| LOC100133 | -1.76535 | 1.19915  | -3.45046 | 0.002548 | 0.011363 | -1.73973 |
| ACTBL2    | 0.683695 | -0.66625 | 3.450446 | 0.002548 | 0.011363 | -1.73977 |
| CCDC28A   | -0.55408 | 0.14648  | -3.45033 | 0.002549 | 0.011364 | -1.74001 |
| EPHX1     | 0.983798 | -0.05152 | 3.450051 | 0.002551 | 0.011368 | -1.74063 |
| DHFR      | -2.53877 | 1.412113 | -3.44966 | 0.002553 | 0.011376 | -1.74148 |
| CORO2A    | -1.13608 | 0.502759 | -3.44922 | 0.002555 | 0.011385 | -1.74244 |
| SLA       | -0.94618 | 0.481746 | -3.44863 | 0.002559 | 0.011398 | -1.74374 |
| DBR1      | -0.77856 | 0.430252 | -3.44823 | 0.002561 | 0.011406 | -1.74461 |
| ATP5J     | -0.68168 | 0.212711 | -3.44794 | 0.002563 | 0.011409 | -1.74524 |
| PHF1      | 0.48294  | -0.26426 | 3.44792  | 0.002563 | 0.011409 | -1.74529 |

|           |          |          |          |          |          |          |
|-----------|----------|----------|----------|----------|----------|----------|
| GJB5      | -0.83611 | 0.049837 | -3.44747 | 0.002566 | 0.011418 | -1.74628 |
| LOC10065: | -1.56469 | 0.943579 | -3.44723 | 0.002567 | 0.011419 | -1.74679 |
| SYT1      | -0.6742  | 0.103348 | -3.46224 | 0.002631 | 0.011633 | -1.74691 |
| GPX4      | 0.848491 | -0.28938 | 3.446655 | 0.002571 | 0.011432 | -1.74805 |
| CELA2A    | 0.820936 | -0.51185 | 3.446345 | 0.002572 | 0.011437 | -1.74873 |
| C15orf56  | -0.79223 | 0.138778 | -3.44611 | 0.002574 | 0.011441 | -1.74924 |
| ZC3H15    | -0.91943 | 0.272011 | -3.4457  | 0.002576 | 0.011446 | -1.75015 |
| GYPC      | 1.701368 | -0.77642 | 3.445636 | 0.002577 | 0.011446 | -1.75028 |
| C19orf60  | 0.762449 | -0.48534 | 3.445458 | 0.002578 | 0.011448 | -1.75067 |
| C1QTNF5   | 0.588479 | -0.32568 | 3.445355 | 0.002578 | 0.011448 | -1.7509  |
| CCPG1     | -0.64253 | 0.095419 | -3.44525 | 0.002579 | 0.011448 | -1.75113 |
| SCAND2    | -0.42452 | 0.188476 | -3.44318 | 0.002591 | 0.0115   | -1.75565 |
| ALDH1A1   | 1.351934 | -0.5201  | 3.442194 | 0.002597 | 0.011521 | -1.75781 |
| UVRAG     | -0.81789 | 0.560124 | -3.44192 | 0.002599 | 0.011526 | -1.7584  |
| RP2       | -1.36864 | 0.842798 | -3.44164 | 0.0026   | 0.011531 | -1.75902 |
| RNF138    | -1.09743 | 0.272965 | -3.44125 | 0.002603 | 0.011536 | -1.75986 |
| BCHE      | 0.63191  | -0.50125 | 3.440993 | 0.002604 | 0.01154  | -1.76043 |
| RUNX3     | 1.075704 | -0.39172 | 3.44077  | 0.002606 | 0.011543 | -1.76092 |
| DOCK5     | -1.38595 | 1.048238 | -3.44043 | 0.002608 | 0.01155  | -1.76167 |
| C22orf37  | -1.09725 | 0.727463 | -3.44013 | 0.00261  | 0.011555 | -1.76232 |
| SCAMP2    | -0.61533 | 0.536854 | -3.43998 | 0.00261  | 0.011557 | -1.76265 |
| CEACAM4   | -1.26924 | 0.75751  | -3.43908 | 0.002616 | 0.011578 | -1.76462 |
| PRSS8     | 0.555155 | -0.43649 | 3.438307 | 0.002621 | 0.011596 | -1.7663  |
| KPNA6     | -0.7388  | 0.650971 | -3.43759 | 0.002625 | 0.011613 | -1.76788 |
| SUPT16H   | -0.60701 | 0.411192 | -3.43696 | 0.002629 | 0.011627 | -1.76925 |
| DYSF      | -1.18659 | 0.932107 | -3.43653 | 0.002631 | 0.011633 | -1.7702  |
| ZBTB32    | -0.8879  | 1.244061 | -3.43642 | 0.002632 | 0.011633 | -1.77042 |
| TLE1      | -0.98053 | 0.884417 | -3.43604 | 0.002634 | 0.011641 | -1.77127 |
| PGAM1     | -0.56973 | 0.374439 | -3.43594 | 0.002635 | 0.011641 | -1.77147 |
| SULT1B1   | -2.16466 | 1.028421 | -3.43503 | 0.00264  | 0.011657 | -1.77347 |
| GNB3      | 0.467491 | -0.15944 | 3.434996 | 0.002641 | 0.011657 | -1.77354 |
| MYO18A    | -0.7612  | 0.792296 | -3.43483 | 0.002642 | 0.011657 | -1.7739  |
| LINC00402 | 1.26492  | -0.84668 | 3.436013 | 0.002792 | 0.012094 | -1.77403 |
| SSH1      | -1.37726 | 1.412949 | -3.43457 | 0.002643 | 0.011657 | -1.77447 |
| DMRTA1    | 0.87451  | -0.27288 | 3.434198 | 0.002645 | 0.011664 | -1.77528 |
| PHLDA3    | 0.852767 | -0.52748 | 3.43409  | 0.002646 | 0.011664 | -1.77552 |
| IKBKB     | -0.6109  | 0.523104 | -3.43388 | 0.002647 | 0.011667 | -1.77597 |
| ABCC11    | -0.58406 | 0.088835 | -3.4338  | 0.002648 | 0.011667 | -1.77616 |
| PKMYT1    | -0.91826 | 0.783181 | -3.43333 | 0.002651 | 0.011676 | -1.77718 |
| CACNB4    | 0.869211 | -0.5056  | 3.433274 | 0.002651 | 0.011676 | -1.7773  |
| SRP14     | -0.79213 | 0.265448 | -3.43303 | 0.002653 | 0.01168  | -1.77782 |
| DNAH17    | -1.70367 | 1.10491  | -3.43266 | 0.002655 | 0.011687 | -1.77864 |
| CCDC43    | -0.70469 | 0.463479 | -3.43224 | 0.002657 | 0.011694 | -1.77956 |
| COX7B     | 0.669398 | -0.41813 | 3.432193 | 0.002658 | 0.011694 | -1.77966 |
| BAZ2A     | -0.87367 | 0.680529 | -3.43207 | 0.002658 | 0.011695 | -1.77992 |
| ALKBH8    | 0.809709 | -0.63096 | 3.43174  | 0.00266  | 0.011701 | -1.78065 |
| LYRM2     | -0.64733 | 0.259752 | -3.4313  | 0.002663 | 0.011708 | -1.78162 |

|           |          |          |          |          |          |          |
|-----------|----------|----------|----------|----------|----------|----------|
| SCYL3     | -0.83332 | 0.425899 | -3.43112 | 0.002664 | 0.01171  | -1.78201 |
| C14orf129 | -1.1951  | -0.2025  | -3.43089 | 0.002666 | 0.011714 | -1.7825  |
| ADIPOR1   | 1.200536 | -0.5426  | 3.430653 | 0.002667 | 0.011718 | -1.78302 |
| KRTAP5-9  | 0.683896 | -0.51278 | 3.429537 | 0.002674 | 0.011745 | -1.78546 |
| CSF3R     | -1.20853 | 0.957617 | -3.42878 | 0.002679 | 0.011761 | -1.78713 |
| MED26     | -0.79532 | 0.531643 | -3.42872 | 0.002679 | 0.011761 | -1.78725 |
| AXL       | 0.760036 | -0.47081 | 3.428552 | 0.00268  | 0.011761 | -1.78761 |
| OR4F4     | -1.20239 | 0.206053 | -3.42854 | 0.00268  | 0.011761 | -1.78764 |
| CDHR2     | 0.912862 | -0.83041 | 3.427116 | 0.002689 | 0.011792 | -1.79075 |
| DPYSL5    | -0.93477 | 0.12586  | -3.42708 | 0.002689 | 0.011792 | -1.79083 |
| LOC100509 | 0.487159 | -0.49747 | 3.426987 | 0.00269  | 0.011792 | -1.79103 |
| TBL2      | -0.5697  | 0.389201 | -3.42693 | 0.00269  | 0.011792 | -1.79115 |
| TSPAN2    | -1.26242 | 0.750587 | -3.42674 | 0.002691 | 0.011792 | -1.79157 |
| STAG2     | -1.16025 | 0.36401  | -3.42673 | 0.002691 | 0.011792 | -1.7916  |
| PRDX3     | -1.03347 | 0.113192 | -3.42647 | 0.002693 | 0.011797 | -1.79216 |
| LBH       | 1.458791 | -0.6583  | 3.426315 | 0.002694 | 0.011798 | -1.7925  |
| TUBE1     | -0.86399 | 0.039105 | -3.42616 | 0.002695 | 0.0118   | -1.79284 |
| RECQL5    | -1.64721 | 0.653445 | -3.42583 | 0.002697 | 0.011806 | -1.79356 |
| GRM3      | -0.66835 | 0.24578  | -3.4253  | 0.0027   | 0.011815 | -1.79471 |
| DALRD3    | -0.56771 | 0.357252 | -3.42496 | 0.002702 | 0.011821 | -1.79546 |
| UTP20     | 0.713775 | -0.19447 | 3.424812 | 0.002703 | 0.011821 | -1.79578 |
| ASPHD2    | -0.99467 | 0.666989 | -3.42478 | 0.002703 | 0.011821 | -1.79585 |
| TROVE2    | -0.8185  | 0.514126 | -3.4241  | 0.002708 | 0.011837 | -1.79734 |
| CPSF7     | -0.79113 | 0.669938 | -3.42385 | 0.002709 | 0.011841 | -1.79787 |
| PLA2G5    | 0.824695 | -0.55405 | 3.423534 | 0.002711 | 0.011847 | -1.79857 |
| SASH3     | -0.74022 | 0.69707  | -3.42333 | 0.002713 | 0.01185  | -1.79902 |
| DOT1L     | -0.81971 | 0.659006 | -3.42308 | 0.002714 | 0.011854 | -1.79956 |
| AGXT2L2   | -0.49784 | 0.305643 | -3.42212 | 0.00272  | 0.011875 | -1.80165 |
| ART1      | 0.998759 | -0.39384 | 3.436546 | 0.002788 | 0.012084 | -1.80206 |
| MORC1     | 0.557492 | -0.33421 | 3.421895 | 0.002721 | 0.011879 | -1.80215 |
| XPNPEP2   | 0.786799 | -0.36682 | 3.421235 | 0.002726 | 0.011894 | -1.80359 |
| RGPD1     | 0.787836 | -0.18283 | 3.451743 | 0.002871 | 0.012326 | -1.80399 |
| SAR1A     | -0.6498  | 0.298917 | -3.42064 | 0.002729 | 0.011908 | -1.80489 |
| UBE2D3    | -0.74056 | 0.576406 | -3.42022 | 0.002732 | 0.011917 | -1.8058  |
| SPP1      | 1.499423 | -0.70826 | 3.434642 | 0.0028   | 0.0121   | -1.80615 |
| C9orf79   | 0.614709 | -0.36324 | 3.419995 | 0.002733 | 0.01192  | -1.8063  |
| HGC6.3    | 0.755055 | -0.55111 | 3.419891 | 0.002734 | 0.01192  | -1.80652 |
| PDE4C     | 0.51467  | -0.17379 | 3.41974  | 0.002735 | 0.01192  | -1.80685 |
| SH2B2     | -0.86801 | 1.049657 | -3.41972 | 0.002735 | 0.01192  | -1.8069  |
| TCTE3     | 0.819642 | -0.64252 | 3.419574 | 0.002736 | 0.01192  | -1.80721 |
| AKT1S1    | -0.83897 | 1.199341 | -3.41954 | 0.002736 | 0.01192  | -1.8073  |
| GATAD1    | -0.66784 | 0.609711 | -3.41942 | 0.002737 | 0.01192  | -1.80756 |
| C16orf3   | 0.772481 | -0.68692 | 3.418215 | 0.002745 | 0.011951 | -1.81018 |
| PTPRM     | 1.026895 | -0.32804 | 3.417705 | 0.002748 | 0.011962 | -1.81129 |
| PTGR1     | -1.66532 | 0.902525 | -3.41739 | 0.00275  | 0.011968 | -1.81198 |
| MSX2P1    | 1.13293  | -0.67125 | 3.41606  | 0.002758 | 0.012002 | -1.81488 |
| HGD       | 1.450689 | -0.603   | 3.415739 | 0.00276  | 0.012008 | -1.81558 |

|           |          |          |          |          |          |          |
|-----------|----------|----------|----------|----------|----------|----------|
| ERI2      | -0.92915 | 0.364381 | -3.41513 | 0.002764 | 0.012023 | -1.81691 |
| GALNS     | -0.96789 | 0.769193 | -3.41496 | 0.002765 | 0.012025 | -1.81728 |
| AIM2      | -2.45684 | 1.970212 | -3.41415 | 0.00277  | 0.012037 | -1.81905 |
| SNIP1     | -0.78498 | 0.633987 | -3.4141  | 0.002771 | 0.012037 | -1.81915 |
| CNOT8     | -0.84166 | 0.26623  | -3.41409 | 0.002771 | 0.012037 | -1.81917 |
| WNT6      | 0.788512 | -0.21058 | 3.414087 | 0.002771 | 0.012037 | -1.81919 |
| CDH4      | 0.75984  | -0.49936 | 3.414028 | 0.002771 | 0.012037 | -1.81932 |
| KRT76     | 0.731975 | -0.37055 | 3.41376  | 0.002773 | 0.012041 | -1.8199  |
| LRFN2     | 0.815768 | -0.36081 | 3.413705 | 0.002773 | 0.012041 | -1.82002 |
| AKNA      | -0.98414 | 0.94745  | -3.41341 | 0.002775 | 0.012046 | -1.82066 |
| STAU2     | -0.81415 | 0.364809 | -3.41269 | 0.00278  | 0.012062 | -1.82224 |
| IFT57     | -1.26478 | 0.464728 | -3.41263 | 0.00278  | 0.012062 | -1.82236 |
| B3GNTL1   | -0.86759 | 0.522137 | -3.41184 | 0.002785 | 0.012082 | -1.82409 |
| TARDBP    | -0.81145 | 0.411285 | -3.41152 | 0.002787 | 0.012084 | -1.82479 |
| PLXDC2    | -1.22758 | 1.224016 | -3.4115  | 0.002787 | 0.012084 | -1.82483 |
| TBC1D8    | -2.59941 | 1.196108 | -3.41134 | 0.002788 | 0.012084 | -1.82518 |
| LINC00506 | 1.024043 | -0.30998 | 3.411297 | 0.002789 | 0.012084 | -1.82528 |
| CDKL2     | 0.527666 | -0.13358 | 3.410707 | 0.002792 | 0.012095 | -1.82656 |
| XDH       | -0.63377 | 0.069255 | -3.41052 | 0.002794 | 0.012096 | -1.82698 |
| DPH5      | -0.86147 | 0.392014 | -3.4104  | 0.002794 | 0.012096 | -1.82723 |
| FOXP3     | 0.783206 | -0.11587 | 3.410358 | 0.002795 | 0.012096 | -1.82732 |
| TMEM127   | -0.99594 | 1.019254 | -3.41022 | 0.002796 | 0.012096 | -1.82762 |
| C1orf94   | -0.66862 | 0.240932 | -3.41019 | 0.002796 | 0.012096 | -1.82768 |
| NFKB2     | -0.77773 | 0.847834 | -3.40994 | 0.002797 | 0.012098 | -1.82823 |
| CWC15     | -0.80002 | 0.549923 | -3.40983 | 0.002798 | 0.012098 | -1.82848 |
| FLJ90680  | -0.82915 | 0.144369 | -3.40981 | 0.002798 | 0.012098 | -1.82851 |
| RHOT2     | -0.55824 | 0.44762  | -3.40956 | 0.0028   | 0.0121   | -1.82906 |
| POLR3F    | -0.66324 | 0.004948 | -3.40915 | 0.002803 | 0.012106 | -1.82996 |
| NCOR1     | -0.86832 | 0.543451 | -3.40846 | 0.002807 | 0.012121 | -1.83146 |
| SCGB2A1   | -1.01358 | 0.202716 | -3.40839 | 0.002807 | 0.012121 | -1.83161 |
| IGSF11    | -0.69603 | 0.289142 | -3.40832 | 0.002808 | 0.012121 | -1.83176 |
| OR8K3     | -0.8062  | 0.260909 | -3.40822 | 0.002809 | 0.012121 | -1.83198 |
| SPIRE2    | -0.47397 | 0.240737 | -3.40728 | 0.002815 | 0.012143 | -1.83403 |
| MORC4     | 1.073926 | -0.56559 | 3.40726  | 0.002815 | 0.012143 | -1.83408 |
| ARMC9     | 0.702046 | -0.32886 | 3.407007 | 0.002816 | 0.012147 | -1.83463 |
| INTS6     | -1.17286 | 1.04395  | -3.40673 | 0.002818 | 0.012152 | -1.83524 |
| ST3GAL2   | -0.9948  | 0.733315 | -3.40641 | 0.00282  | 0.012158 | -1.83592 |
| GCAT      | 1.322549 | -0.8104  | 3.405839 | 0.002824 | 0.012172 | -1.83718 |
| DPH3P1    | -1.2245  | 0.62794  | -3.40549 | 0.002826 | 0.012179 | -1.83795 |
| NPAS1     | 0.705746 | -0.31638 | 3.404778 | 0.002831 | 0.012196 | -1.83949 |
| C1QB      | -1.88423 | 1.568502 | -3.40461 | 0.002832 | 0.012198 | -1.83986 |
| BANK1     | -1.07937 | 0.609268 | -3.40441 | 0.002833 | 0.012201 | -1.84029 |
| RCOR2     | 0.980322 | -0.47989 | 3.404255 | 0.002834 | 0.012203 | -1.84063 |
| BLOC1S1   | -0.99246 | 0.40398  | -3.4038  | 0.002837 | 0.012213 | -1.84161 |
| CA10      | -0.65706 | 0.209298 | -3.40318 | 0.002841 | 0.012228 | -1.84298 |
| MOAP1     | -0.66166 | 0.260226 | -3.403   | 0.002842 | 0.01223  | -1.84336 |
| IL1B      | -1.54714 | 0.859315 | -3.40279 | 0.002844 | 0.012233 | -1.84383 |

|           |          |          |          |          |          |          |
|-----------|----------|----------|----------|----------|----------|----------|
| GSC2      | 0.80522  | -0.2099  | 3.438223 | 0.003167 | 0.013275 | -1.84387 |
| INSL4     | -0.90447 | 0.057215 | -3.40249 | 0.002846 | 0.012239 | -1.84449 |
| EBF3      | -1.00919 | 0.258768 | -3.41633 | 0.002919 | 0.012484 | -1.84541 |
| PROM2     | 0.492858 | -0.25551 | 3.401461 | 0.002853 | 0.012265 | -1.84672 |
| EPHA5     | -1.37045 | 0.433527 | -3.43125 | 0.003004 | 0.012765 | -1.84708 |
| DNAH12    | 0.939782 | -0.25773 | 3.400957 | 0.002856 | 0.012277 | -1.84782 |
| HMGA2     | 0.659633 | -0.19772 | 3.430773 | 0.003007 | 0.012771 | -1.84808 |
| MOK       | 0.528934 | -0.10183 | 3.39978  | 0.002864 | 0.012307 | -1.85039 |
| DKFZP434I | -1.90952 | 0.555535 | -3.3997  | 0.002864 | 0.012307 | -1.85055 |
| DCLK2     | 0.774969 | -0.23469 | 3.399884 | 0.003029 | 0.012841 | -1.8512  |
| OR6W1P    | 0.767408 | -0.53922 | 3.399354 | 0.002866 | 0.012314 | -1.85131 |
| SGSM2     | -0.65138 | 0.662963 | -3.39898 | 0.002869 | 0.012322 | -1.85213 |
| ELF4      | -1.47069 | 1.480637 | -3.39873 | 0.002871 | 0.012326 | -1.85268 |
| ZNF585A   | -1.06627 | 0.721828 | -3.39842 | 0.002873 | 0.012329 | -1.85335 |
| LOC100655 | 0.669864 | -0.52617 | 3.398334 | 0.002873 | 0.012329 | -1.85354 |
| MIER1     | -1.21956 | 0.603283 | -3.39811 | 0.002875 | 0.012331 | -1.85404 |
| VDAC3     | -0.57647 | 0.408745 | -3.39808 | 0.002875 | 0.012331 | -1.8541  |
| NMUR2     | 1.040656 | -0.32845 | 3.397417 | 0.002879 | 0.012347 | -1.85554 |
| DPYSL4    | 1.481557 | -1.01593 | 3.431986 | 0.00321  | 0.013396 | -1.85666 |
| SCRT2     | 0.932359 | -0.38971 | 3.396137 | 0.002888 | 0.012381 | -1.85833 |
| SAMD9L    | -1.73571 | 1.016336 | -3.39603 | 0.002888 | 0.012381 | -1.85856 |
| LOC100655 | -0.80506 | -0.03441 | -3.39514 | 0.002894 | 0.012404 | -1.86051 |
| C1QTNF3   | -1.26692 | 0.429403 | -3.39458 | 0.002898 | 0.012417 | -1.86172 |
| RGP1      | -1.21973 | 1.119228 | -3.3943  | 0.0029   | 0.012422 | -1.86232 |
| DNAJC13   | -0.97863 | 0.359559 | -3.39405 | 0.002902 | 0.012427 | -1.86288 |
| C9orf24   | 0.624546 | -0.16164 | 3.393765 | 0.002903 | 0.012432 | -1.86349 |
| UROC1     | 0.522142 | -0.28052 | 3.393433 | 0.002906 | 0.012439 | -1.86422 |
| LLGL2     | 0.700102 | -0.04499 | 3.393026 | 0.002908 | 0.012448 | -1.8651  |
| MEIS1     | 1.102884 | -0.61967 | 3.392478 | 0.002912 | 0.012461 | -1.8663  |
| ABHD2     | -1.19377 | 0.767455 | -3.392   | 0.002915 | 0.012472 | -1.86735 |
| LINC00162 | 0.680259 | -0.62996 | 3.405977 | 0.002988 | 0.012712 | -1.86758 |
| AP1M2     | 1.340074 | -0.23134 | 3.391384 | 0.002919 | 0.012484 | -1.86868 |
| PLEKHF2   | -0.97946 | 0.232889 | -3.39121 | 0.002921 | 0.012486 | -1.86906 |
| SLC1A3    | -2.34708 | 0.783644 | -3.39105 | 0.002922 | 0.012488 | -1.8694  |
| SPDYE7P   | -0.4522  | 0.200467 | -3.39074 | 0.002924 | 0.012494 | -1.87007 |
| UBE2DNL   | 0.708539 | -0.44368 | 3.390634 | 0.002924 | 0.012495 | -1.87031 |
| ATP6V1A   | -1.03401 | 0.702703 | -3.3902  | 0.002927 | 0.012505 | -1.87126 |
| UQCRFS1   | -0.4955  | 0.013865 | -3.39002 | 0.002929 | 0.012507 | -1.87165 |
| C19orf34  | 1.408501 | -1.0379  | 3.408109 | 0.00338  | 0.013885 | -1.87261 |
| OR51E2    | -0.37334 | 0.008809 | -3.38954 | 0.002932 | 0.012518 | -1.87269 |
| MORC2-AS  | 0.893931 | -0.69431 | 3.388793 | 0.002937 | 0.012537 | -1.87432 |
| RPS3      | 1.082882 | -0.96527 | 3.387622 | 0.002945 | 0.012565 | -1.87687 |
| SLC36A4   | -0.82331 | -0.0621  | -3.38755 | 0.002945 | 0.012565 | -1.87703 |
| ZNF131    | -0.67293 | 0.16722  | -3.3864  | 0.002953 | 0.012595 | -1.87954 |
| LOC1      | 0.558406 | -0.20372 | 3.385964 | 0.002956 | 0.012605 | -1.88048 |
| OK/SW-CL  | -0.86489 | 0.175724 | -3.38562 | 0.002958 | 0.012612 | -1.88124 |
| NPPA      | 1.532138 | -0.90252 | 3.401689 | 0.003207 | 0.013386 | -1.88184 |

|           |          |          |          |          |          |          |
|-----------|----------|----------|----------|----------|----------|----------|
| PYGL      | -1.70551 | 1.196981 | -3.38506 | 0.002962 | 0.012626 | -1.88245 |
| C3orf51   | 0.717598 | -0.39763 | 3.384726 | 0.002964 | 0.012633 | -1.88318 |
| LOC100501 | 0.545549 | -0.35641 | 3.38408  | 0.002969 | 0.012647 | -1.88459 |
| TBP       | -0.41059 | 0.28202  | -3.38402 | 0.002969 | 0.012647 | -1.88472 |
| LOC100128 | -1.10613 | 0.913577 | -3.38395 | 0.00297  | 0.012647 | -1.88487 |
| C1orf210  | 0.827975 | -0.89444 | 3.397865 | 0.003043 | 0.012885 | -1.88494 |
| BAG6      | 0.937648 | -0.36393 | 3.38363  | 0.002972 | 0.012654 | -1.88557 |
| C9orf125  | 0.999901 | -0.73023 | 3.417358 | 0.003313 | 0.013701 | -1.88663 |
| LOC100506 | -0.93306 | -0.15315 | -3.38292 | 0.003147 | 0.013216 | -1.88736 |
| MAF       | 0.744975 | -0.3511  | 3.382713 | 0.002978 | 0.012678 | -1.88756 |
| RARRES3   | 1.139621 | -0.85058 | 3.382017 | 0.002983 | 0.012695 | -1.88908 |
| STX3      | -1.29027 | 0.856958 | -3.39558 | 0.003059 | 0.012947 | -1.88984 |
| LOC100501 | -0.58701 | 0.311529 | -3.3808  | 0.002991 | 0.012725 | -1.89172 |
| LINC00473 | -0.66139 | 0.112342 | -3.3795  | 0.003    | 0.01276  | -1.89456 |
| ATCAY     | 0.828862 | -0.45301 | 3.379172 | 0.003003 | 0.012765 | -1.89527 |
| FAM111A   | -1.16538 | 0.72822  | -3.37916 | 0.003003 | 0.012765 | -1.8953  |
| GZMA      | 1.779425 | -1.4627  | 3.378912 | 0.003004 | 0.012765 | -1.89584 |
| ITGA2     | 0.861718 | -0.29208 | 3.378886 | 0.003004 | 0.012765 | -1.89589 |
| ALPK1     | -1.43463 | 0.869395 | -3.37848 | 0.003007 | 0.012771 | -1.89678 |
| TEX13B    | 0.551387 | -0.44668 | 3.392152 | 0.003082 | 0.01303  | -1.89716 |
| NDUFB6    | -0.65639 | 0.516534 | -3.37826 | 0.003009 | 0.012775 | -1.89725 |
| GOLT1A    | 0.682629 | -0.30338 | 3.377862 | 0.003012 | 0.012784 | -1.89812 |
| NFE2L1    | -0.59554 | 0.479641 | -3.37727 | 0.003016 | 0.012798 | -1.8994  |
| EXTL1     | 0.563596 | -0.28195 | 3.377032 | 0.003017 | 0.012802 | -1.89993 |
| CCNB2     | -1.61662 | 1.079509 | -3.37643 | 0.003021 | 0.012817 | -1.90123 |
| NID1      | 1.214989 | -0.26322 | 3.376158 | 0.003023 | 0.012823 | -1.90183 |
| SLC5A3    | 0.933718 | -0.13872 | 3.38979  | 0.003099 | 0.013071 | -1.90222 |
| TAGAP     | -0.88951 | 0.86241  | -3.37536 | 0.003029 | 0.012841 | -1.90357 |
| ARHGEF1   | -0.71711 | 0.704481 | -3.37427 | 0.003037 | 0.01287  | -1.90594 |
| ZMYM5     | -1.26775 | 0.436445 | -3.37401 | 0.003038 | 0.012875 | -1.90649 |
| PRKAR1A   | -1.38231 | 0.827391 | -3.37377 | 0.00304  | 0.012879 | -1.90702 |
| VAV1      | -0.62452 | 0.430737 | -3.37357 | 0.003041 | 0.012882 | -1.90746 |
| MYO19     | -0.65366 | 0.508315 | -3.37252 | 0.003049 | 0.012908 | -1.90974 |
| TNFAIP1   | -0.33253 | 0.150049 | -3.37103 | 0.003059 | 0.012947 | -1.91299 |
| BEX5      | 0.899858 | -0.33125 | 3.370356 | 0.003064 | 0.012964 | -1.91445 |
| PFKFB3    | -1.63084 | 1.097711 | -3.36913 | 0.003073 | 0.012998 | -1.91712 |
| FBXL20    | -1.15844 | 0.877823 | -3.36865 | 0.003076 | 0.013009 | -1.91816 |
| SLITRK2   | 1.029571 | -0.50902 | 3.367838 | 0.003256 | 0.013536 | -1.9195  |
| GATA5     | 0.842907 | -0.22225 | 3.368032 | 0.00308  | 0.013025 | -1.9195  |
| CAMKMT    | 1.150376 | -0.39849 | 3.412795 | 0.003346 | 0.01379  | -1.92072 |
| USP19     | -0.71364 | 0.751271 | -3.36728 | 0.003086 | 0.013042 | -1.92115 |
| FAM13A-A  | -0.83462 | 0.53205  | -3.36698 | 0.003088 | 0.013048 | -1.92179 |
| RNF14     | -0.4705  | 0.109692 | -3.36639 | 0.003092 | 0.013063 | -1.92307 |
| C20orf106 | -0.94255 | 0.938927 | -3.36624 | 0.003093 | 0.013064 | -1.92341 |
| TCP11L1   | -0.61559 | 0.52156  | -3.3661  | 0.003094 | 0.013066 | -1.92371 |
| ALDOB     | 0.820327 | -0.38418 | 3.365844 | 0.003096 | 0.013071 | -1.92426 |
| CLN3      | -0.65851 | 0.594182 | -3.36568 | 0.003097 | 0.013071 | -1.92462 |

|           |          |          |          |          |          |          |
|-----------|----------|----------|----------|----------|----------|----------|
| ZNF615    | -1.71745 | 0.732068 | -3.36563 | 0.003097 | 0.013071 | -1.92472 |
| SDSL      | 1.111748 | -0.32577 | 3.365393 | 0.003099 | 0.013071 | -1.92524 |
| PTMS      | 0.902299 | -0.37969 | 3.365164 | 0.003101 | 0.013071 | -1.92574 |
| ZNF695    | -0.85122 | 0.114699 | -3.36512 | 0.003101 | 0.013071 | -1.92583 |
| LOC80054  | 0.517085 | -0.10152 | 3.365106 | 0.003101 | 0.013071 | -1.92587 |
| NELF      | -1.01696 | 1.202934 | -3.36507 | 0.003101 | 0.013071 | -1.92594 |
| GAL3ST2   | 0.906715 | -0.36032 | 3.364893 | 0.003103 | 0.013071 | -1.92633 |
| SHCBP1    | -1.69303 | 1.135306 | -3.36489 | 0.003103 | 0.013071 | -1.92634 |
| TMEM62    | -0.65553 | 0.242296 | -3.3647  | 0.003104 | 0.013074 | -1.92676 |
| FLJ11710  | 0.615758 | -0.67692 | 3.364508 | 0.003105 | 0.013077 | -1.92717 |
| CD27      | 1.412253 | -0.38834 | 3.364226 | 0.003107 | 0.013083 | -1.92778 |
| PHOX2B    | 1.165413 | -0.26683 | 3.363894 | 0.003285 | 0.01362  | -1.9279  |
| NFKBIA    | -1.02436 | 0.391519 | -3.36337 | 0.003114 | 0.013106 | -1.92964 |
| SLC25A24  | -1.27062 | 0.442421 | -3.36287 | 0.003117 | 0.013116 | -1.93073 |
| BTBD7     | -1.06721 | 0.553157 | -3.36283 | 0.003117 | 0.013116 | -1.93082 |
| SH3KBP1   | -0.67586 | 0.674796 | -3.3618  | 0.003125 | 0.01314  | -1.93304 |
| CYB5R1    | -0.76048 | 0.290961 | -3.36175 | 0.003125 | 0.01314  | -1.93317 |
| GBE1      | -0.84141 | 0.281522 | -3.3612  | 0.003129 | 0.013154 | -1.93436 |
| MTMR6     | -1.15197 | 0.400179 | -3.36097 | 0.003131 | 0.013158 | -1.93485 |
| CAPSL     | 0.621979 | -0.15685 | 3.359174 | 0.003522 | 0.014305 | -1.93521 |
| BCL10     | -0.9108  | 0.607843 | -3.36012 | 0.003137 | 0.01318  | -1.93671 |
| OTX1      | 0.626502 | -0.35018 | 3.360073 | 0.003137 | 0.01318  | -1.93681 |
| ITGA9     | -0.99436 | 0.148215 | -3.35936 | 0.003142 | 0.013198 | -1.93835 |
| TMEM33    | -1.21736 | 0.570851 | -3.35843 | 0.003149 | 0.01322  | -1.94038 |
| LAMTOR1   | -0.50095 | 0.220209 | -3.35837 | 0.003149 | 0.01322  | -1.94051 |
| RHOXF1    | 1.649525 | -0.42319 | 3.447305 | 0.004905 | 0.018292 | -1.94154 |
| SLC43A3   | -1.65943 | 1.149182 | -3.35761 | 0.003155 | 0.01324  | -1.94215 |
| LOC100129 | 0.590389 | -0.4358  | 3.357275 | 0.003157 | 0.013248 | -1.94289 |
| NBPF1     | -0.6106  | 0.42779  | -3.35706 | 0.003159 | 0.013251 | -1.94335 |
| WHSC1L1   | -0.59475 | 0.803938 | -3.35671 | 0.003161 | 0.013259 | -1.94411 |
| XPO6      | -0.9852  | 0.871879 | -3.35655 | 0.003163 | 0.013261 | -1.94445 |
| TOR3A     | -1.03206 | 0.664167 | -3.35628 | 0.003165 | 0.013267 | -1.94505 |
| MON1A     | 0.563922 | -0.17449 | 3.35556  | 0.00317  | 0.013283 | -1.94661 |
| SNUPN     | -0.62012 | 0.386758 | -3.35507 | 0.003173 | 0.013295 | -1.94769 |
| C18orf25  | -0.98799 | 0.950161 | -3.35488 | 0.003175 | 0.013298 | -1.9481  |
| EDNRB     | -1.13468 | 0.446379 | -3.35427 | 0.003179 | 0.013314 | -1.94942 |
| OR7E156P  | -0.78877 | 0.390837 | -3.35416 | 0.00318  | 0.013314 | -1.94965 |
| PDZD4     | 0.51745  | -0.33893 | 3.354078 | 0.003181 | 0.013314 | -1.94983 |
| LSM2      | -0.63982 | 0.324077 | -3.35354 | 0.003185 | 0.013327 | -1.951   |
| PEAK1     | -0.86517 | 0.17529  | -3.35347 | 0.003185 | 0.013327 | -1.95116 |
| ARHGAP15  | -0.85046 | 0.42744  | -3.35321 | 0.003187 | 0.013332 | -1.95171 |
| HPCAL4    | 0.713198 | -0.19586 | 3.366233 | 0.003268 | 0.013574 | -1.95257 |
| MACF1     | -1.12704 | 0.579663 | -3.35255 | 0.003192 | 0.013349 | -1.95316 |
| KCTD18    | -0.66234 | 0.163994 | -3.35221 | 0.003194 | 0.013357 | -1.95389 |
| GAB3      | -0.88683 | 0.429247 | -3.352   | 0.003196 | 0.013359 | -1.95434 |
| C9orf9    | -0.89533 | 0.834825 | -3.35185 | 0.003197 | 0.013359 | -1.95468 |
| KCNE1L    | -1.33673 | 1.138612 | -3.35184 | 0.003197 | 0.013359 | -1.95469 |



|           |          |          |          |          |          |          |
|-----------|----------|----------|----------|----------|----------|----------|
| ATP8A1    | -1.05815 | 0.722889 | -3.35149 | 0.0032   | 0.013366 | -1.95546 |
| ATP2A3    | -1.14484 | 1.085728 | -3.35141 | 0.0032   | 0.013366 | -1.95563 |
| RNF182    | 2.558035 | -1.62363 | 3.350817 | 0.003383 | 0.013894 | -1.95572 |
| AGA       | -0.61778 | 0.394454 | -3.35136 | 0.003201 | 0.013366 | -1.95574 |
| HUS1      | -0.72384 | 0.493634 | -3.35056 | 0.003206 | 0.013386 | -1.95748 |
| OGFOD1    | -0.77133 | 0.78664  | -3.35    | 0.003211 | 0.013396 | -1.9587  |
| GOLGA8E   | 0.926073 | -0.12189 | 3.349848 | 0.003212 | 0.013398 | -1.95902 |
| C5orf35   | -0.81423 | -0.13965 | -3.37784 | 0.00338  | 0.013885 | -1.95918 |
| C14orf109 | -0.52374 | 0.200247 | -3.34974 | 0.003212 | 0.013398 | -1.95925 |
| ZDHHC1    | 0.40883  | -0.13145 | 3.349158 | 0.003217 | 0.013413 | -1.96052 |
| FAM149A   | 0.948452 | -0.24501 | 3.348135 | 0.003404 | 0.013944 | -1.96143 |
| APOL2     | -1.05615 | 0.878718 | -3.34865 | 0.003221 | 0.013425 | -1.96163 |
| HDAC4     | -1.16208 | 0.45063  | -3.34857 | 0.003221 | 0.013425 | -1.96181 |
| SLC16A5   | -0.90861 | 0.447644 | -3.34849 | 0.003222 | 0.013425 | -1.96197 |
| F11R      | 0.918148 | -0.37675 | 3.347983 | 0.003225 | 0.013438 | -1.96307 |
| WDR85     | -0.69927 | 0.609049 | -3.34781 | 0.003227 | 0.013441 | -1.96344 |
| EEPD1     | -1.25452 | 0.31134  | -3.3476  | 0.003228 | 0.013444 | -1.9639  |
| UBE2G1    | -0.80157 | 0.531245 | -3.34711 | 0.003232 | 0.013457 | -1.96497 |
| ASCL3     | 0.680637 | -0.29535 | 3.359855 | 0.003315 | 0.013701 | -1.96618 |
| PRSS56    | 0.600166 | -0.5223  | 3.345691 | 0.003242 | 0.013498 | -1.96805 |
| PLA2G4A   | -1.10832 | 0.460866 | -3.34525 | 0.003246 | 0.013508 | -1.96901 |
| WDR12     | -0.71803 | 0.342021 | -3.3451  | 0.003247 | 0.01351  | -1.96932 |
| ACSBG2    | 0.488943 | -0.24355 | 3.344533 | 0.003251 | 0.013525 | -1.97056 |
| SPATA18   | 0.702801 | -0.44195 | 3.344386 | 0.003252 | 0.013527 | -1.97088 |
| DUSP13    | -1.74649 | 1.005747 | -3.34399 | 0.003255 | 0.013536 | -1.97174 |
| KCNJ6     | 0.361854 | -0.0941  | 3.357018 | 0.003336 | 0.013771 | -1.97224 |
| LOC645166 | -1.27032 | 1.124038 | -3.34339 | 0.00326  | 0.013549 | -1.97304 |
| CT45A5    | -1.08595 | 0.513161 | -3.35664 | 0.003339 | 0.013775 | -1.97305 |
| NFRKB     | -0.67912 | 0.602269 | -3.34293 | 0.003263 | 0.01356  | -1.97403 |
| KLK4      | 0.704238 | -0.35512 | 3.342517 | 0.003266 | 0.01357  | -1.97494 |
| LOC404266 | 0.58173  | -0.37285 | 3.341843 | 0.003271 | 0.013582 | -1.9764  |
| FZD6      | -0.8342  | 0.103044 | -3.34184 | 0.003271 | 0.013582 | -1.9764  |
| OR2W1     | -1.19332 | 0.278516 | -3.34174 | 0.003272 | 0.013582 | -1.97662 |
| LDB3      | 0.761548 | -0.48222 | 3.341691 | 0.003272 | 0.013582 | -1.97673 |
| NCOR2     | 0.711087 | -0.18869 | 3.341235 | 0.003276 | 0.013593 | -1.97772 |
| IL2RB     | 1.419868 | -0.48757 | 3.340867 | 0.003279 | 0.013601 | -1.97852 |
| TTC33     | -1.07256 | 0.100676 | -3.34079 | 0.003279 | 0.013601 | -1.97868 |
| PLK3      | -0.88157 | 0.206946 | -3.34008 | 0.003285 | 0.01362  | -1.98023 |
| E2F6      | -0.69602 | 0.258891 | -3.3398  | 0.003287 | 0.013623 | -1.98083 |
| C14orf132 | 0.967032 | -0.83322 | 3.339462 | 0.003289 | 0.013631 | -1.98157 |
| TMPRSS2   | 0.738889 | -0.55875 | 3.339267 | 0.003291 | 0.013633 | -1.98199 |
| TDRD7     | -1.05393 | 0.571427 | -3.33922 | 0.003291 | 0.013633 | -1.98208 |
| BCAS3     | -0.71738 | 0.762683 | -3.33902 | 0.003293 | 0.013636 | -1.98253 |
| PPP1R17   | -1.44596 | 0.653341 | -3.35204 | 0.003374 | 0.013876 | -1.98287 |
| GSK3B     | -0.81393 | 0.727889 | -3.33885 | 0.003294 | 0.013638 | -1.9829  |
| CLEC1B    | -1.16796 | 0.793962 | -3.33877 | 0.003294 | 0.013638 | -1.98306 |
| TLK1      | -1.08208 | 0.559483 | -3.35179 | 0.003376 | 0.013876 | -1.9834  |

|           |          |          |          |          |          |          |
|-----------|----------|----------|----------|----------|----------|----------|
| DEK       | -0.95123 | 0.101261 | -3.3382  | 0.003299 | 0.013653 | -1.98431 |
| COL4A6    | -0.83762 | 0.181374 | -3.33809 | 0.0033   | 0.013654 | -1.98454 |
| CD44      | -1.03286 | 0.441209 | -3.33727 | 0.003306 | 0.013677 | -1.98632 |
| ACVR2A    | 0.590852 | -0.19035 | 3.336478 | 0.003312 | 0.013699 | -1.98804 |
| SLC9A10   | 0.941533 | -0.39066 | 3.363739 | 0.003487 | 0.01419  | -1.98871 |
| PIGV      | -0.62022 | 0.385094 | -3.3361  | 0.003315 | 0.013701 | -1.98885 |
| TGM3      | 1.128959 | -0.12057 | 3.33603  | 0.003315 | 0.013701 | -1.98901 |
| CXorf38   | -1.11015 | 0.619719 | -3.33588 | 0.003316 | 0.013703 | -1.98934 |
| OR2W3     | 1.803835 | -0.63138 | 3.335796 | 0.003317 | 0.013703 | -1.98952 |
| KLF9      | 0.901641 | -0.988   | 3.335485 | 0.003319 | 0.01371  | -1.99019 |
| SFSWAP    | -0.50729 | 0.704978 | -3.33462 | 0.003326 | 0.013733 | -1.99207 |
| NEK9      | -1.5871  | 1.025483 | -3.33455 | 0.003326 | 0.013733 | -1.99222 |
| DEGS1     | -1.08764 | 0.578235 | -3.3331  | 0.003338 | 0.013773 | -1.99538 |
| SNCB      | 0.760615 | -0.36917 | 3.332868 | 0.003339 | 0.013775 | -1.99587 |
| TH        | 0.689377 | -0.49824 | 3.332775 | 0.00334  | 0.013775 | -1.99607 |
| NPFF      | -0.61661 | 0.64553  | -3.33237 | 0.003343 | 0.013782 | -1.99695 |
| PLA2G2F   | 0.84631  | -0.35785 | 3.332356 | 0.003343 | 0.013782 | -1.99698 |
| HIST1H2BI | -1.20303 | 0.892701 | -3.33123 | 0.003352 | 0.013812 | -1.99941 |
| KCTD20    | -0.67199 | 0.319118 | -3.3309  | 0.003354 | 0.01382  | -2.00014 |
| C2orf66   | -0.58044 | 0.128474 | -3.34368 | 0.003438 | 0.014046 | -2.0007  |
| CARS2     | -0.92882 | 0.754227 | -3.33044 | 0.003358 | 0.013829 | -2.00114 |
| RALGPS1   | -0.85752 | 0.603344 | -3.33041 | 0.003358 | 0.013829 | -2.00121 |
| WDSUB1    | -0.84648 | 0.224221 | -3.32998 | 0.003361 | 0.01384  | -2.00214 |
| KRCC1     | -1.14829 | 0.28749  | -3.3299  | 0.003362 | 0.01384  | -2.00232 |
| IWS1      | -1.11316 | 1.015836 | -3.32944 | 0.003366 | 0.013851 | -2.0033  |
| GUCA2B    | 1.079274 | -0.30467 | 3.327895 | 0.003562 | 0.014418 | -2.00444 |
| ELMOD2    | -1.07    | 0.023417 | -3.3289  | 0.00337  | 0.013866 | -2.00448 |
| ARIH1     | -0.78704 | 0.465796 | -3.32877 | 0.003371 | 0.013867 | -2.00476 |
| LCE3E     | 0.517544 | -0.47821 | 3.328177 | 0.003375 | 0.013876 | -2.00604 |
| SNX12     | -0.68225 | 0.477305 | -3.32811 | 0.003376 | 0.013876 | -2.00618 |
| SFTPA1    | 0.959105 | -0.23334 | 3.327543 | 0.00338  | 0.013885 | -2.00742 |
| MAPRE1    | -0.94278 | 0.623594 | -3.32688 | 0.003385 | 0.013898 | -2.00886 |
| FMO1      | -0.71373 | 0.423251 | -3.32682 | 0.003386 | 0.013898 | -2.00899 |
| DLGAP5    | -1.73087 | 1.1945   | -3.32673 | 0.003387 | 0.013898 | -2.00918 |
| ARF5      | -0.62006 | 0.168665 | -3.32669 | 0.003387 | 0.013898 | -2.00927 |
| NPC2      | 0.7276   | -0.59166 | 3.326605 | 0.003388 | 0.013898 | -2.00945 |
| SEMA3F    | 0.45638  | -0.28791 | 3.326342 | 0.00339  | 0.013903 | -2.01002 |
| C6orf1    | -0.52239 | 0.375461 | -3.3257  | 0.003395 | 0.013921 | -2.01141 |
| YIPF1     | -0.87114 | 0.45281  | -3.3254  | 0.003397 | 0.013926 | -2.01205 |
| HSP90AA1  | -1.39638 | 0.92703  | -3.32535 | 0.003397 | 0.013926 | -2.01217 |
| CREBZF    | -0.96951 | 0.172188 | -3.3378  | 0.003484 | 0.014179 | -2.01322 |
| E2F2      | 1.287239 | -1.11358 | 3.324751 | 0.003402 | 0.013942 | -2.01347 |
| FKBP8     | 1.354459 | -0.29448 | 3.324531 | 0.003404 | 0.013944 | -2.01395 |
| ARV1      | -0.87773 | 0.290603 | -3.32428 | 0.003406 | 0.013949 | -2.01449 |
| HTR2B     | 0.814601 | -0.08531 | 3.322338 | 0.003607 | 0.014532 | -2.01624 |
| PLTP      | 0.886764 | -0.22198 | 3.32313  | 0.003415 | 0.013983 | -2.01698 |
| IQSEC1    | -0.87958 | 0.615352 | -3.32277 | 0.003417 | 0.013991 | -2.01775 |

|           |          |          |          |          |          |          |
|-----------|----------|----------|----------|----------|----------|----------|
| KIAA1715  | -2.04327 | 0.717156 | -3.32232 | 0.003421 | 0.014003 | -2.01873 |
| KLF1      | 1.605454 | -0.39829 | 3.321969 | 0.003424 | 0.01401  | -2.0195  |
| ASPM      | -1.48696 | 0.707843 | -3.32191 | 0.003424 | 0.01401  | -2.01963 |
| SMG8      | -0.49923 | 0.163076 | -3.32178 | 0.003425 | 0.01401  | -2.01992 |
| HYLS1     | -0.58092 | 0.546158 | -3.32172 | 0.003426 | 0.01401  | -2.02003 |
| LOC100501 | 0.625167 | -0.18918 | 3.334562 | 0.003509 | 0.014257 | -2.02013 |
| RNF20     | -0.88627 | 0.699077 | -3.32162 | 0.003426 | 0.014011 | -2.02025 |
| PHLPP2    | 1.022496 | -0.41322 | 3.320421 | 0.003623 | 0.014569 | -2.0203  |
| SCN2A     | 0.991681 | -0.27347 | 3.320144 | 0.003625 | 0.014572 | -2.02089 |
| RPS15     | 1.244055 | -0.75455 | 3.321048 | 0.003431 | 0.014026 | -2.02149 |
| CYR61     | -0.84808 | 0.261222 | -3.32065 | 0.003434 | 0.014036 | -2.02236 |
| METTL14   | -0.73705 | 0.086943 | -3.32056 | 0.003435 | 0.014036 | -2.02256 |
| DISP1     | 0.844034 | -0.39013 | 3.319917 | 0.00344  | 0.014051 | -2.02394 |
| FOSL1     | -0.93559 | 0.419444 | -3.3198  | 0.003441 | 0.014051 | -2.02419 |
| PTPRH     | 0.652655 | -0.45801 | 3.333294 | 0.003729 | 0.014903 | -2.02465 |
| PIN4      | -0.84955 | 0.107702 | -3.31837 | 0.003639 | 0.014616 | -2.02465 |
| OPN1SW    | 0.586605 | -0.36584 | 3.319004 | 0.003447 | 0.014074 | -2.02592 |
| DDAH2     | -1.52311 | 1.110822 | -3.31865 | 0.00345  | 0.014083 | -2.02668 |
| SAA3P     | -1.33868 | 0.229854 | -3.31829 | 0.003453 | 0.014092 | -2.02748 |
| RBM33     | -0.97354 | 0.335483 | -3.31809 | 0.003454 | 0.014095 | -2.0279  |
| NGB       | 0.762257 | -0.3425  | 3.317254 | 0.003461 | 0.014119 | -2.02971 |
| UBTD1     | -1.10695 | 0.951286 | -3.31715 | 0.003462 | 0.01412  | -2.02995 |
| FRY       | 1.071265 | -0.59241 | 3.316662 | 0.003466 | 0.014132 | -2.031   |
| FARP1     | 1.121316 | -0.4491  | 3.316204 | 0.003469 | 0.014144 | -2.03199 |
| RNF216    | -0.99111 | 0.915513 | -3.31604 | 0.003471 | 0.014147 | -2.03235 |
| SPTAN1    | 0.956937 | -0.37828 | 3.315797 | 0.003473 | 0.014151 | -2.03287 |
| RAB11A    | -0.63916 | 0.28736  | -3.3156  | 0.003474 | 0.014151 | -2.03329 |
| MCL1      | -1.34782 | 0.786212 | -3.31558 | 0.003474 | 0.014151 | -2.03333 |
| G6PD      | -1.04045 | 0.843293 | -3.31555 | 0.003474 | 0.014151 | -2.0334  |
| USP6      | -0.66659 | 0.331803 | -3.31523 | 0.003477 | 0.014158 | -2.0341  |
| NOXA1     | 0.811916 | -0.39459 | 3.314405 | 0.003484 | 0.014179 | -2.03588 |
| CBR4      | -0.86308 | 0.491498 | -3.31284 | 0.003496 | 0.014224 | -2.03926 |
| RILPL1    | -0.95577 | 0.831608 | -3.31211 | 0.003502 | 0.014245 | -2.04085 |
| TRAPPC9   | 0.733988 | -0.31275 | 3.311817 | 0.003504 | 0.014252 | -2.04149 |
| LPGAT1    | -1.24887 | 0.592663 | -3.31167 | 0.003506 | 0.014254 | -2.04182 |
| MPPE1     | -0.62198 | 0.449217 | -3.31143 | 0.003507 | 0.014257 | -2.04233 |
| KIAA2013  | -0.54152 | 0.627305 | -3.31137 | 0.003508 | 0.014257 | -2.04245 |
| INPP5J    | 0.418766 | -0.3957  | 3.324024 | 0.003593 | 0.014499 | -2.04258 |
| KIAA1370  | -0.87144 | 0.445319 | -3.31125 | 0.003509 | 0.014257 | -2.04272 |
| MOS       | 0.9515   | -0.5634  | 3.30953  | 0.003523 | 0.014305 | -2.04644 |
| IDH3A     | -0.93738 | 0.612678 | -3.30945 | 0.003523 | 0.014305 | -2.04661 |
| PI16      | 1.390008 | -0.99141 | 3.309186 | 0.003526 | 0.014311 | -2.04718 |
| SWT1      | -0.5856  | 0.1336   | -3.30902 | 0.003527 | 0.014314 | -2.04755 |
| STAT5A    | -0.51254 | 0.441354 | -3.30891 | 0.003528 | 0.014314 | -2.04777 |
| FRAT1     | -1.18585 | 1.184432 | -3.30848 | 0.003531 | 0.014321 | -2.04871 |
| MSRB2     | -0.95321 | 0.619183 | -3.30844 | 0.003532 | 0.014321 | -2.04881 |
| ZNF93     | -0.70712 | 0.248476 | -3.30836 | 0.003532 | 0.014321 | -2.04898 |

|           |          |          |          |          |          |          |
|-----------|----------|----------|----------|----------|----------|----------|
| ETV6      | -1.02151 | 0.891154 | -3.30835 | 0.003532 | 0.014321 | -2.04899 |
| QSOX2     | -0.77224 | 0.442071 | -3.30811 | 0.003534 | 0.014326 | -2.04952 |
| SPATA20   | 0.780337 | -0.13899 | 3.307927 | 0.003536 | 0.014329 | -2.04991 |
| IFNB1     | 0.755333 | -0.43189 | 3.307646 | 0.003538 | 0.014335 | -2.05052 |
| C18orf8   | -0.55347 | 0.206707 | -3.3067  | 0.003546 | 0.014363 | -2.05256 |
| FGD5      | 1.12775  | -0.32972 | 3.298052 | 0.004284 | 0.016526 | -2.05338 |
| KRT16P3   | -0.90391 | 0.075392 | -3.31828 | 0.00364  | 0.014616 | -2.05482 |
| PRKCD     | -0.93895 | 0.676115 | -3.30537 | 0.003556 | 0.014404 | -2.05544 |
| LOC100501 | 0.740915 | -0.74384 | 3.305156 | 0.003558 | 0.014408 | -2.05591 |
| UBE2F     | -0.70447 | 0.081277 | -3.30482 | 0.003561 | 0.014416 | -2.05664 |
| ACCN1     | 0.563989 | -0.30979 | 3.304278 | 0.003565 | 0.014428 | -2.05781 |
| LOC100501 | -1.40515 | 0.617244 | -3.3039  | 0.003568 | 0.014438 | -2.05863 |
| DDX56     | -0.89313 | 0.908882 | -3.30363 | 0.003571 | 0.014443 | -2.05921 |
| KRT72     | 1.245597 | -0.42576 | 3.302751 | 0.003578 | 0.014469 | -2.06111 |
| ZNF625    | -0.55833 | 0.198781 | -3.30267 | 0.003578 | 0.014469 | -2.06128 |
| OTUD7A    | 0.761177 | -0.38951 | 3.301968 | 0.003584 | 0.01448  | -2.06281 |
| RAB3GAP2  | -1.38797 | 0.403428 | -3.30192 | 0.003585 | 0.01448  | -2.0629  |
| KLF12     | 1.435227 | -1.23462 | 3.301901 | 0.003585 | 0.01448  | -2.06295 |
| LOC100130 | 0.420058 | -0.15019 | 3.301893 | 0.003585 | 0.01448  | -2.06297 |
| SPEF1     | 1.406747 | -0.1719  | 3.30188  | 0.003585 | 0.01448  | -2.063   |
| ENPP2     | -0.72856 | 0.202446 | -3.30144 | 0.003589 | 0.014492 | -2.06395 |
| CPNE1     | -0.72584 | 0.458856 | -3.30126 | 0.00359  | 0.014495 | -2.06434 |
| DAZL      | -1.08522 | 0.169622 | -3.30118 | 0.003591 | 0.014495 | -2.06451 |
| PCDHB7    | 0.782837 | -0.49011 | 3.30092  | 0.003593 | 0.014499 | -2.06507 |
| HAT1      | -1.40854 | 0.083015 | -3.30032 | 0.003598 | 0.014514 | -2.06637 |
| RBFOX2    | 0.755177 | -0.24182 | 3.300023 | 0.0036   | 0.014521 | -2.06701 |
| TMEM120   | -0.90555 | 0.399503 | -3.29989 | 0.003601 | 0.014521 | -2.0673  |
| PCNXL3    | -0.44878 | 0.576444 | -3.29985 | 0.003602 | 0.014521 | -2.06739 |
| C3orf39   | 0.865724 | -0.22269 | 3.299285 | 0.003606 | 0.014532 | -2.06861 |
| ATG14     | 0.97887  | -0.32487 | 3.299274 | 0.003606 | 0.014532 | -2.06863 |
| DDX60L    | -1.51373 | 0.865486 | -3.29903 | 0.003608 | 0.014532 | -2.06916 |
| ACSL1     | -1.56516 | 0.924694 | -3.299   | 0.003609 | 0.014532 | -2.06924 |
| CLIP1     | -0.875   | 0.360069 | -3.29898 | 0.003609 | 0.014532 | -2.06927 |
| HNRNPUL1  | -0.85985 | 0.877706 | -3.29885 | 0.00361  | 0.014532 | -2.06955 |
| ERLEC1    | -0.96803 | 0.20998  | -3.29881 | 0.00361  | 0.014532 | -2.06964 |
| AP1AR     | -0.86524 | 0.069148 | -3.31097 | 0.0037   | 0.014812 | -2.07037 |
| MTF1      | -2.27465 | 1.239483 | -3.29809 | 0.003616 | 0.014552 | -2.07119 |
| ANKRD13C  | -0.65092 | 0.719583 | -3.29803 | 0.003617 | 0.014552 | -2.07133 |
| CAB39     | -1.37962 | 0.514044 | -3.29775 | 0.003619 | 0.014558 | -2.07194 |
| HIST1H2BM | -1.00424 | 0.790373 | -3.29718 | 0.003624 | 0.014571 | -2.07317 |
| TMEM108   | 0.692703 | -0.08987 | 3.296972 | 0.003626 | 0.014572 | -2.07361 |
| SSR4      | 0.682882 | -0.38065 | 3.296131 | 0.003633 | 0.014597 | -2.07543 |
| EPN2      | 0.942181 | -0.16928 | 3.295954 | 0.003634 | 0.0146   | -2.07581 |
| GLT25D2   | 0.526578 | -0.15335 | 3.295202 | 0.00364  | 0.014616 | -2.07744 |
| COA5      | -0.60736 | 0.060025 | -3.29507 | 0.003641 | 0.014618 | -2.07773 |
| TWSG1     | 1.560892 | -0.49606 | 3.306803 | 0.003953 | 0.015591 | -2.07981 |
| UMOD      | 0.749885 | -0.51032 | 3.293866 | 0.003651 | 0.014655 | -2.08033 |

|           |          |          |          |          |          |          |
|-----------|----------|----------|----------|----------|----------|----------|
| SLC22A24  | -0.83395 | 0.258532 | -3.29325 | 0.003657 | 0.014671 | -2.08167 |
| C19orf33  | 0.991681 | -0.54192 | 3.293202 | 0.003657 | 0.014671 | -2.08177 |
| MRPL36    | -0.51363 | 0.258745 | -3.29287 | 0.00366  | 0.014679 | -2.08248 |
| MYO1H     | 0.543148 | -0.08397 | 3.292478 | 0.003663 | 0.01469  | -2.08333 |
| NUP62CL   | 1.046974 | -0.49975 | 3.29046  | 0.003875 | 0.015373 | -2.08383 |
| CXXC1     | -0.53664 | 0.496583 | -3.29207 | 0.003666 | 0.0147   | -2.08422 |
| C14orf105 | 2.161059 | -0.66812 | 4.217056 | 0.008866 | 0.028456 | -2.08447 |
| TTK       | -2.3166  | 0.924061 | -3.29172 | 0.003669 | 0.014709 | -2.08498 |
| ATP13A3   | -1.49599 | 0.643773 | -3.29104 | 0.003675 | 0.014727 | -2.08643 |
| UBOX5     | -0.84055 | 0.685843 | -3.29102 | 0.003675 | 0.014727 | -2.08649 |
| CREB3     | -0.44221 | 0.468617 | -3.29047 | 0.00368  | 0.014742 | -2.08768 |
| PGM3      | -0.73386 | 0.517827 | -3.29007 | 0.003683 | 0.014753 | -2.08854 |
| ZP3       | 0.771814 | 0.002893 | 3.289535 | 0.003688 | 0.014768 | -2.08969 |
| RBM34     | -0.79852 | 0.731435 | -3.28805 | 0.0037   | 0.014812 | -2.09289 |
| NQO2      | -1.22565 | 0.748412 | -3.28762 | 0.003704 | 0.014823 | -2.09384 |
| SCN3A     | 0.730104 | -0.52082 | 3.299878 | 0.003794 | 0.015116 | -2.09396 |
| LCORL     | -0.74488 | 0.131764 | -3.2871  | 0.003708 | 0.014838 | -2.09495 |
| SYVN1     | -0.90331 | 0.926154 | -3.28696 | 0.00371  | 0.01484  | -2.09526 |
| PPP4R2    | -1.245   | 0.847685 | -3.28685 | 0.00371  | 0.01484  | -2.09549 |
| POLE2     | -1.09067 | 0.581337 | -3.29904 | 0.003801 | 0.015133 | -2.09573 |
| IFT88     | -1.00784 | 0.619751 | -3.28483 | 0.003924 | 0.015506 | -2.09575 |
| TRIM17    | 0.533485 | -0.34711 | 3.31469  | 0.004134 | 0.016109 | -2.09644 |
| PGBD2     | -0.66884 | 0.391807 | -3.28619 | 0.003716 | 0.01486  | -2.09691 |
| THSD7B    | -0.71248 | 0.179907 | -3.28487 | 0.003727 | 0.0149   | -2.09976 |
| CD300LD   | 0.687125 | -0.11796 | 3.284836 | 0.003728 | 0.0149   | -2.09985 |
| LOC100130 | -0.83004 | -0.17199 | -3.28426 | 0.003732 | 0.014913 | -2.10108 |
| GBA2      | -1.32052 | 1.284768 | -3.2841  | 0.003734 | 0.014916 | -2.10144 |
| KPTN      | -0.64256 | 0.526598 | -3.28381 | 0.003736 | 0.014923 | -2.10206 |
| INO80C    | -0.33177 | 0.248814 | -3.28328 | 0.003741 | 0.014938 | -2.10321 |
| MICU1     | -0.71499 | 0.538919 | -3.28278 | 0.003745 | 0.014952 | -2.10428 |
| LINC00467 | -0.87783 | 0.234279 | -3.28267 | 0.003746 | 0.014952 | -2.10452 |
| CACHD1    | -0.42983 | 0.093016 | -3.28242 | 0.003748 | 0.014958 | -2.10506 |
| TSR2      | -0.63477 | 0.436199 | -3.28115 | 0.003759 | 0.014998 | -2.1078  |
| FAM26D    | 0.784112 | -0.30442 | 3.293293 | 0.00385  | 0.015294 | -2.10795 |
| C8orf60   | -1.28495 | 0.844896 | -3.281   | 0.00376  | 0.015001 | -2.10813 |
| SERP1     | -1.44874 | 0.577212 | -3.28036 | 0.003766 | 0.01502  | -2.10952 |
| APOBEC2   | 0.876675 | -0.21403 | 3.345287 | 0.004475 | 0.017081 | -2.11004 |
| FAM187B   | 0.955811 | -0.49444 | 3.276991 | 0.003994 | 0.015713 | -2.11234 |
| TTC32     | -1.19292 | 0.342415 | -3.27878 | 0.00378  | 0.015071 | -2.11294 |
| TULP1     | 0.675174 | -0.50269 | 3.290629 | 0.003873 | 0.01537  | -2.11361 |
| C1orf27   | 0.844014 | -0.34966 | 3.278305 | 0.003784 | 0.015084 | -2.11395 |
| ATP5J2    | -0.65227 | 0.282171 | -3.27728 | 0.003793 | 0.015116 | -2.11616 |
| KRTAP1-3  | 0.731081 | -0.58766 | 3.277101 | 0.003794 | 0.015116 | -2.11655 |
| LOC100131 | 0.864576 | -0.36696 | 3.276806 | 0.003797 | 0.015124 | -2.11719 |
| PHLDB2    | 0.836534 | -0.18938 | 3.276605 | 0.003798 | 0.015127 | -2.11762 |
| ENPP6     | 0.621256 | -0.38427 | 3.288432 | 0.003893 | 0.015434 | -2.11828 |
| FAM107B   | -0.57113 | 0.085399 | -3.27628 | 0.003801 | 0.015133 | -2.11833 |

|           |          |          |          |          |          |          |
|-----------|----------|----------|----------|----------|----------|----------|
| PSMC2     | -0.91848 | 0.299649 | -3.27576 | 0.003806 | 0.015148 | -2.11946 |
| DSTN      | 0.580193 | -0.54883 | 3.274948 | 0.003813 | 0.015173 | -2.1212  |
| GIGYF2    | -1.12153 | 0.601727 | -3.27388 | 0.003822 | 0.015205 | -2.12351 |
| SH3GL1    | -0.54938 | 0.537675 | -3.27382 | 0.003823 | 0.015205 | -2.12362 |
| C11orf86  | 0.654742 | -0.29282 | 3.27096  | 0.004048 | 0.015877 | -2.12509 |
| PCDHA5    | 1.132707 | -0.52455 | 3.273099 | 0.003829 | 0.015228 | -2.12519 |
| CSAD      | -1.2704  | 0.817738 | -3.27293 | 0.003831 | 0.01523  | -2.12556 |
| LOC100506 | -1.16655 | 0.337915 | -3.27266 | 0.003833 | 0.015237 | -2.12613 |
| CYP1B1    | -1.9558  | 0.546854 | -3.27243 | 0.003835 | 0.015242 | -2.12664 |
| LOC100507 | 0.715338 | -0.68934 | 3.283894 | 0.004158 | 0.016183 | -2.12743 |
| RAB21     | -1.52143 | 1.282626 | -3.27098 | 0.003848 | 0.015287 | -2.12977 |
| GRIK2     | -0.89606 | 0.174445 | -3.27096 | 0.003848 | 0.015287 | -2.1298  |
| XAGE1A    | -1.36933 | 0.26806  | -3.26872 | 0.004069 | 0.015926 | -2.12983 |
| MTCH1     | -0.71485 | 0.572613 | -3.27051 | 0.003852 | 0.015296 | -2.13079 |
| UBR7      | -0.99509 | 0.698865 | -3.27017 | 0.003855 | 0.015305 | -2.13151 |
| RAB11FIP2 | -0.72902 | 0.131038 | -3.2685  | 0.00387  | 0.01536  | -2.13512 |
| FOXP1     | 0.855208 | -0.41718 | 3.268224 | 0.003872 | 0.015367 | -2.13571 |
| ZNF18     | -0.47368 | 0.416786 | -3.26751 | 0.003878 | 0.015383 | -2.13726 |
| DPF2      | 0.453486 | -0.00131 | 3.267246 | 0.003881 | 0.015389 | -2.13782 |
| FKBP7     | -0.79572 | 0.194853 | -3.27847 | 0.003981 | 0.01567  | -2.13943 |
| SIPA1     | -0.5401  | 0.624751 | -3.26571 | 0.003894 | 0.015437 | -2.14112 |
| UEVLD     | -1.72577 | 0.905331 | -3.26528 | 0.003898 | 0.015449 | -2.14207 |
| C1orf183  | 0.52836  | -0.33562 | 3.265164 | 0.003899 | 0.01545  | -2.14231 |
| OR4X2     | 0.824208 | -0.4559  | 3.264948 | 0.003901 | 0.015454 | -2.14278 |
| RBM14     | -1.2997  | 1.070073 | -3.26478 | 0.003903 | 0.015457 | -2.14314 |
| DPPA3     | 0.802218 | -0.13917 | 3.276626 | 0.003997 | 0.015721 | -2.14334 |
| IBSP      | 0.713106 | -0.19773 | 3.264603 | 0.003904 | 0.01546  | -2.14352 |
| TERF1     | -0.71551 | 0.626653 | -3.26452 | 0.003905 | 0.01546  | -2.14369 |
| CBWD2     | -0.71637 | 0.301452 | -3.26441 | 0.003906 | 0.015461 | -2.14394 |
| PAPOLA    | -1.11919 | 0.68916  | -3.26391 | 0.00391  | 0.015475 | -2.14502 |
| LOC154767 | -1.31057 | 0.648669 | -3.26384 | 0.003911 | 0.015475 | -2.14516 |
| SON       | -0.56487 | 0.286149 | -3.26373 | 0.003912 | 0.015476 | -2.14541 |
| DAD1      | -0.54306 | 0.465838 | -3.26344 | 0.003915 | 0.01548  | -2.14604 |
| ZSCAN29   | -0.51707 | 0.31736  | -3.26343 | 0.003915 | 0.01548  | -2.14604 |
| TRIM54    | 0.792649 | -0.22394 | 3.27493  | 0.00424  | 0.016378 | -2.14605 |
| OR11A1    | 0.636676 | -0.48577 | 3.263204 | 0.003917 | 0.015485 | -2.14654 |
| C7orf29   | -0.81893 | 0.429324 | -3.26294 | 0.003919 | 0.015491 | -2.1471  |
| BUB1      | -1.33293 | 1.244455 | -3.26277 | 0.00392  | 0.015494 | -2.14747 |
| EML3      | -0.55405 | 0.59816  | -3.26211 | 0.003926 | 0.015506 | -2.1489  |
| SHFM1     | -0.84207 | 0.748177 | -3.26208 | 0.003927 | 0.015506 | -2.14896 |
| SPSB4     | 0.565032 | -0.50012 | 3.262081 | 0.003927 | 0.015506 | -2.14896 |
| ARNTL     | -0.82149 | 0.438147 | -3.26192 | 0.003928 | 0.015508 | -2.1493  |
| CRIP2     | 1.204343 | -0.36192 | 3.261752 | 0.00393  | 0.015511 | -2.14967 |
| KIAA0494  | -0.62478 | 0.421162 | -3.26143 | 0.003933 | 0.015519 | -2.15036 |
| RNF26     | 0.713955 | -0.33056 | 3.260176 | 0.003944 | 0.015561 | -2.15307 |
| GNG13     | -0.82624 | -0.00261 | -3.26003 | 0.003945 | 0.015563 | -2.15339 |
| PDLIM4    | 0.687969 | -0.43265 | 3.258923 | 0.003955 | 0.015596 | -2.15577 |

|           |          |          |          |          |          |          |
|-----------|----------|----------|----------|----------|----------|----------|
| PVR       | 1.176439 | -0.83765 | 3.258698 | 0.003957 | 0.015601 | -2.15625 |
| TNFRSF6B  | -0.69049 | 0.577796 | -3.25825 | 0.003961 | 0.015614 | -2.15723 |
| ZNF75D    | -0.62556 | 0.095174 | -3.25799 | 0.003964 | 0.01562  | -2.15779 |
| BBS4      | -0.88871 | 0.32226  | -3.25783 | 0.003965 | 0.015622 | -2.15811 |
| PNLIPRP2  | -0.78667 | 0.036649 | -3.25526 | 0.004193 | 0.016251 | -2.15827 |
| FAM160B1  | -0.9617  | 0.064977 | -3.25772 | 0.003966 | 0.015623 | -2.15836 |
| PAQR7     | 0.629358 | -0.433   | 3.257608 | 0.003967 | 0.015624 | -2.1586  |
| SERPINA1C | 0.973804 | -0.91053 | 3.257504 | 0.003968 | 0.015625 | -2.15883 |
| ZNF486    | 0.746125 | -0.18744 | 3.28083  | 0.004186 | 0.016231 | -2.16188 |
| PAG1      | -1.25236 | 0.125772 | -3.25606 | 0.003981 | 0.01567  | -2.16195 |
| FLJ42627  | 0.528604 | -0.24258 | 3.255169 | 0.003989 | 0.015699 | -2.16386 |
| PCSK5     | 1.341016 | -0.56222 | 3.254609 | 0.003994 | 0.015713 | -2.16507 |
| PSMC5     | -0.48787 | 0.389758 | -3.25379 | 0.004002 | 0.015736 | -2.16683 |
| CYP19A1   | -3.19039 | 1.225809 | -3.25364 | 0.004003 | 0.015738 | -2.16716 |
| FOLH1     | 0.584346 | -0.40637 | 3.253482 | 0.004005 | 0.01574  | -2.1675  |
| SF3A3     | -0.4408  | 0.657669 | -3.25291 | 0.00401  | 0.015758 | -2.16873 |
| CD2       | 1.590571 | -0.91158 | 3.252649 | 0.004012 | 0.015762 | -2.16929 |
| LOC100506 | -1.19375 | 0.00734  | -3.25262 | 0.004012 | 0.015762 | -2.16934 |
| ZNF713    | 0.654842 | -1.04092 | 3.252063 | 0.004018 | 0.015779 | -2.17055 |
| DONSON    | -1.14182 | 0.974559 | -3.25075 | 0.00403  | 0.015823 | -2.17338 |
| ANKH      | 1.511995 | -0.3648  | 3.250578 | 0.004031 | 0.015826 | -2.17375 |
| MLLT10    | -0.56346 | 0.457043 | -3.25038 | 0.004033 | 0.015828 | -2.17419 |
| CDK10     | -0.60046 | 0.798018 | -3.25033 | 0.004034 | 0.015828 | -2.17429 |
| MBD6      | -0.76554 | 0.427821 | -3.25028 | 0.004034 | 0.015828 | -2.1744  |
| CAPZA2    | -1.16198 | 0.511707 | -3.24983 | 0.004038 | 0.015841 | -2.17537 |
| LOC100129 | -1.25078 | 0.726382 | -3.24864 | 0.004049 | 0.015877 | -2.17792 |
| PTPN2     | -1.71202 | 0.83977  | -3.2481  | 0.004054 | 0.015894 | -2.1791  |
| CHML      | -0.44102 | 0.006767 | -3.24783 | 0.004057 | 0.015898 | -2.17966 |
| LRRN2     | 0.812059 | -0.56712 | 3.247809 | 0.004057 | 0.015898 | -2.17972 |
| TNFAIP8L3 | -2.15677 | 0.979054 | -3.24752 | 0.00406  | 0.015905 | -2.18035 |
| MINK1     | -0.79189 | 0.807695 | -3.24739 | 0.004061 | 0.015907 | -2.18062 |
| UCP1      | 0.949784 | -0.5847  | 3.246991 | 0.004064 | 0.015917 | -2.18148 |
| DDC       | -0.69827 | 0.016615 | -3.24694 | 0.004065 | 0.015917 | -2.18158 |
| PRSS2     | 1.043301 | -0.62525 | 3.246762 | 0.004067 | 0.01592  | -2.18197 |
| LRIG3     | 0.894751 | -0.16892 | 3.257951 | 0.004168 | 0.016201 | -2.18295 |
| TFR2      | 0.877917 | -0.23688 | 3.24568  | 0.004077 | 0.015953 | -2.1843  |
| C21orf7   | 1.280722 | -0.02972 | 3.257193 | 0.004175 | 0.016207 | -2.18455 |
| LSM12     | -0.62775 | 0.701789 | -3.24555 | 0.004078 | 0.015954 | -2.18458 |
| CIR1      | -0.9304  | 1.018252 | -3.24536 | 0.00408  | 0.015955 | -2.18499 |
| CTSC      | -1.42852 | 0.555018 | -3.24536 | 0.00408  | 0.015955 | -2.185   |
| AKT2      | -0.7365  | 0.768982 | -3.24514 | 0.004082 | 0.015959 | -2.18547 |
| GPR108    | -0.57246 | 0.519783 | -3.24508 | 0.004082 | 0.015959 | -2.1856  |
| STX8      | -0.66587 | 0.475379 | -3.24471 | 0.004086 | 0.015969 | -2.18639 |
| PRR15L    | -1.1766  | 0.275701 | -3.24448 | 0.004088 | 0.015974 | -2.18688 |
| LOC729234 | -0.628   | -0.01753 | -3.24386 | 0.004094 | 0.015994 | -2.18822 |
| FAM173B   | -1.37599 | 0.936634 | -3.24339 | 0.004098 | 0.016006 | -2.18923 |
| TMEM231   | -0.63587 | 0.22953  | -3.24332 | 0.004099 | 0.016006 | -2.18938 |

|           |          |          |          |          |          |          |
|-----------|----------|----------|----------|----------|----------|----------|
| SPRR3     | 0.741378 | -0.43148 | 3.243219 | 0.0041   | 0.016006 | -2.1896  |
| DDX3X     | -0.95977 | 0.737625 | -3.24319 | 0.0041   | 0.016006 | -2.18967 |
| SPANXA1   | -1.49091 | 0.739919 | -3.24248 | 0.004107 | 0.016022 | -2.1912  |
| PIGB      | -1.08661 | 0.36452  | -3.24243 | 0.004107 | 0.016022 | -2.19129 |
| ADAM15    | -0.98351 | 0.556336 | -3.2424  | 0.004107 | 0.016022 | -2.19137 |
| SNX27     | -0.91776 | 0.667133 | -3.24238 | 0.004107 | 0.016022 | -2.19141 |
| MPHOSPH   | -0.86803 | 0.772664 | -3.24195 | 0.004111 | 0.016033 | -2.19233 |
| KIF1B     | -1.93412 | 1.435525 | -3.24192 | 0.004112 | 0.016033 | -2.19239 |
| FOXI3     | 0.59342  | -0.40619 | 3.24142  | 0.004116 | 0.016048 | -2.19347 |
| ZNF12     | -1.10477 | 0.512991 | -3.24077 | 0.004123 | 0.016068 | -2.19487 |
| INGX      | -0.68501 | 0.252859 | -3.2378  | 0.004361 | 0.016754 | -2.19513 |
| ZNF876P   | 0.695295 | -0.23937 | 3.264721 | 0.004337 | 0.016687 | -2.19542 |
| CAPN2     | 0.788361 | -0.38048 | 3.239231 | 0.004137 | 0.016119 | -2.19818 |
| PPP1R12B  | 1.044797 | -0.41216 | 3.237938 | 0.004149 | 0.016163 | -2.20097 |
| LOC100657 | 0.555357 | -0.15508 | 3.237571 | 0.004153 | 0.016173 | -2.20176 |
| METTTL3   | -0.72611 | 0.300058 | -3.23745 | 0.004154 | 0.016175 | -2.20201 |
| INCENP    | 0.643965 | -0.3339  | 3.261351 | 0.004369 | 0.016778 | -2.20243 |
| CCDC114   | 0.865961 | -0.43745 | 3.237232 | 0.004156 | 0.01618  | -2.20249 |
| IL29      | 0.514485 | -0.08803 | 3.236883 | 0.004159 | 0.016186 | -2.20324 |
| SPATA2L   | 0.830118 | -0.342   | 3.236669 | 0.004161 | 0.016191 | -2.2037  |
| C3        | 1.007017 | -0.29089 | 3.236514 | 0.004163 | 0.016193 | -2.20403 |
| ILVBL     | 0.979296 | -0.5652  | 3.236405 | 0.004164 | 0.016194 | -2.20426 |
| UBAP2L    | -0.67211 | 0.561753 | -3.23623 | 0.004165 | 0.016197 | -2.20464 |
| ARSJ      | -1.06177 | 0.380585 | -3.23608 | 0.004167 | 0.0162   | -2.20497 |
| ZFHX2     | 0.582949 | -0.27351 | 3.235877 | 0.004169 | 0.016201 | -2.2054  |
| KIAA1429  | -0.9568  | 0.379674 | -3.23567 | 0.004171 | 0.016203 | -2.20585 |
| DHX33     | -0.55481 | 0.478036 | -3.23565 | 0.004171 | 0.016203 | -2.20588 |
| VCAN      | 1.809163 | -1.1569  | 3.235484 | 0.004173 | 0.016206 | -2.20625 |
| KRT86     | 0.775553 | -0.34241 | 3.235245 | 0.004175 | 0.016207 | -2.20676 |
| SLC25A37  | -0.78009 | 0.700273 | -3.2352  | 0.004175 | 0.016207 | -2.20687 |
| CYP2C18   | -0.51699 | 0.151164 | -3.23481 | 0.004179 | 0.016218 | -2.2077  |
| SCML4     | 1.222086 | -0.35797 | 3.234709 | 0.00418  | 0.016218 | -2.20791 |
| BPI       | -1.91556 | 1.31484  | -3.23454 | 0.004182 | 0.016221 | -2.20828 |
| FAM65B    | -0.97454 | 0.537215 | -3.23431 | 0.004184 | 0.016227 | -2.20877 |
| CSNK1G2   | -0.51028 | 0.717282 | -3.23376 | 0.004189 | 0.01624  | -2.20996 |
| STARD7    | 0.56975  | -0.54628 | 3.233552 | 0.004191 | 0.016245 | -2.2104  |
| HIST1H4D  | -1.36734 | 1.278348 | -3.23306 | 0.004196 | 0.016257 | -2.21145 |
| VPS33B    | -0.4949  | 0.34473  | -3.23291 | 0.004197 | 0.016259 | -2.21179 |
| NSA2      | -1.08028 | 0.504289 | -3.23264 | 0.0042   | 0.016266 | -2.21237 |
| ECD       | -0.58668 | 0.513887 | -3.23243 | 0.004202 | 0.016271 | -2.21282 |
| CMIP      | -1.20404 | 1.160556 | -3.23216 | 0.004204 | 0.016277 | -2.2134  |
| NR2F1     | 1.607365 | -0.36096 | 3.25741  | 0.004988 | 0.018515 | -2.21386 |
| GPRC5D    | 0.721342 | -0.1728  | 3.231618 | 0.00421  | 0.016294 | -2.21456 |
| TTC30B    | -0.70081 | 0.318354 | -3.24296 | 0.004311 | 0.01661  | -2.21469 |
| CDCA3     | -0.99959 | 0.820879 | -3.23111 | 0.004214 | 0.01631  | -2.21566 |
| C1orf144  | -0.91885 | 0.773005 | -3.23092 | 0.004216 | 0.016314 | -2.21606 |
| CSNK1D    | -1.37117 | 0.977124 | -3.23064 | 0.004219 | 0.01632  | -2.21667 |



|           |          |          |          |          |          |          |
|-----------|----------|----------|----------|----------|----------|----------|
| DCBLD1    | 0.809939 | -0.21216 | 3.230582 | 0.004219 | 0.01632  | -2.21679 |
| SLC14A1   | 1.025634 | -0.39284 | 3.230448 | 0.004221 | 0.016322 | -2.21708 |
| HIST2H2A/ | -1.1918  | 1.034816 | -3.23025 | 0.004223 | 0.016326 | -2.21751 |
| PKNOX2    | -0.88086 | -0.16619 | -3.22273 | 0.004756 | 0.017868 | -2.21752 |
| CTBP1     | -0.60297 | 0.568584 | -3.23014 | 0.004224 | 0.016327 | -2.21773 |
| NIPSNAP3/ | -1.08163 | -0.21933 | -3.24033 | 0.004575 | 0.017367 | -2.21779 |
| STK16     | -0.71063 | 0.360002 | -3.22996 | 0.004225 | 0.01633  | -2.21813 |
| FOLR1     | 0.540314 | -0.25421 | 3.229874 | 0.004226 | 0.01633  | -2.21831 |
| TESK2     | -0.66264 | 0.284138 | -3.22838 | 0.004241 | 0.016378 | -2.22151 |
| SDC2      | 1.596457 | -0.53537 | 3.228282 | 0.004242 | 0.016378 | -2.22174 |
| LOC64929/ | 0.527455 | -0.45665 | 3.22824  | 0.004242 | 0.016378 | -2.22182 |
| CANX      | 0.743576 | -0.84237 | 3.228125 | 0.004243 | 0.016379 | -2.22207 |
| LOC25410/ | 1.327483 | -0.51784 | 3.22803  | 0.004244 | 0.01638  | -2.22228 |
| TREML4    | 3.194201 | 0.001626 | 3.515314 | 0.008117 | 0.026533 | -2.22526 |
| RBL2      | -0.74821 | 0.461721 | -3.22516 | 0.004272 | 0.016483 | -2.22845 |
| KDELR1    | -0.58755 | 0.753847 | -3.22511 | 0.004272 | 0.016483 | -2.22856 |
| SELK      | 1.022677 | -0.91714 | 3.223542 | 0.004288 | 0.016535 | -2.23192 |
| SFXN1     | -0.85519 | 0.440784 | -3.22306 | 0.004292 | 0.01655  | -2.23295 |
| GALK2     | -0.52932 | 0.261934 | -3.22186 | 0.004304 | 0.016592 | -2.23554 |
| RPGR      | -0.94104 | 0.728016 | -3.2213  | 0.00431  | 0.01661  | -2.23674 |
| WDR83     | -0.43607 | 0.436139 | -3.22078 | 0.004315 | 0.016623 | -2.23787 |
| ZDHHC16   | -0.42537 | 0.387269 | -3.2207  | 0.004316 | 0.016623 | -2.23802 |
| AK8       | 0.650521 | -0.37551 | 3.220277 | 0.00432  | 0.016636 | -2.23894 |
| FAM20C    | 0.8111   | -0.37503 | 3.220142 | 0.004321 | 0.016638 | -2.23923 |
| SH3GLB1   | -1.19591 | 0.696537 | -3.21995 | 0.004323 | 0.016641 | -2.23964 |
| ZNF318    | -0.77603 | 0.398411 | -3.21872 | 0.004335 | 0.016685 | -2.24229 |
| PIAS4     | -0.69867 | 0.568068 | -3.21816 | 0.004341 | 0.0167   | -2.24349 |
| ZNF160    | -0.98369 | 0.495443 | -3.21805 | 0.004342 | 0.0167   | -2.24371 |
| CC2D1B    | -0.57675 | 0.406414 | -3.21762 | 0.004346 | 0.016712 | -2.24465 |
| TRAM1L1   | -0.63757 | 0.207549 | -3.2288  | 0.00445  | 0.017014 | -2.24466 |
| CD63      | -1.05987 | 0.415265 | -3.21759 | 0.004346 | 0.016712 | -2.24472 |
| APOD      | 1.215133 | -0.08114 | 3.213938 | 0.0046   | 0.017427 | -2.24542 |
| FAM208A   | -1.28247 | 0.461191 | -3.21692 | 0.004353 | 0.016734 | -2.24615 |
| C12orf74  | 0.90816  | -0.33294 | 3.216826 | 0.004354 | 0.016734 | -2.24635 |
| HEATR1    | 0.753993 | -0.34823 | 3.216715 | 0.004355 | 0.016735 | -2.24659 |
| PHYHD1    | 0.484238 | -0.0693  | 3.215443 | 0.004368 | 0.016777 | -2.24932 |
| GPCPD1    | -0.79715 | 0.101602 | -3.21517 | 0.00437  | 0.016781 | -2.2499  |
| NR4A2     | 1.475736 | -0.74118 | 3.226277 | 0.004475 | 0.017081 | -2.24998 |
| HPCA      | -0.54709 | 0.468672 | -3.21473 | 0.004375 | 0.016794 | -2.25085 |
| PDXDC2P   | -0.95171 | 0.90402  | -3.21447 | 0.004377 | 0.016801 | -2.25141 |
| SLC12A3   | 0.48784  | -0.32438 | 3.214252 | 0.00438  | 0.016806 | -2.25188 |
| EPB49     | 1.810784 | -0.35046 | 3.214085 | 0.004381 | 0.016808 | -2.25224 |
| CERCAM    | 0.516331 | 0.044184 | 3.214042 | 0.004382 | 0.016808 | -2.25233 |
| WNT11     | 0.414261 | -0.2019  | 3.213748 | 0.004385 | 0.016813 | -2.25296 |
| DUSP26    | -1.03632 | 0.279399 | -3.21365 | 0.004385 | 0.016813 | -2.25316 |
| GPR111    | -0.79994 | -0.18097 | -3.21365 | 0.004386 | 0.016813 | -2.25318 |
| GLT1D1    | -1.12356 | 0.777404 | -3.21333 | 0.004389 | 0.016822 | -2.25385 |

|           |          |          |          |          |          |          |
|-----------|----------|----------|----------|----------|----------|----------|
| C9orf174  | 0.841027 | 0.009119 | 3.212174 | 0.0044   | 0.016863 | -2.25634 |
| LOC441124 | -1.31834 | 1.02886  | -3.22237 | 0.004514 | 0.017198 | -2.25824 |
| LZTS2     | -0.85706 | 1.039184 | -3.21129 | 0.004409 | 0.016894 | -2.25824 |
| ARL5B     | -1.01836 | 0.368485 | -3.21099 | 0.004412 | 0.016902 | -2.25889 |
| CCIN      | 1.021777 | -0.44809 | 3.210815 | 0.004414 | 0.016903 | -2.25926 |
| RGR       | 0.773637 | -0.46258 | 3.210786 | 0.004414 | 0.016903 | -2.25932 |
| CASP14    | 0.714464 | -0.26254 | 3.207069 | 0.004671 | 0.017658 | -2.25987 |
| KIF3B     | 0.528128 | -0.07336 | 3.210526 | 0.004417 | 0.01691  | -2.25988 |
| COL1A2    | -0.96147 | 0.518531 | -3.21032 | 0.004419 | 0.016914 | -2.26033 |
| DHRS9     | -1.97534 | 1.177625 | -3.21015 | 0.004421 | 0.016918 | -2.26069 |
| LOC728171 | -1.48048 | 1.091504 | -3.2097  | 0.004425 | 0.016932 | -2.26165 |
| ANGPTL5   | -0.80531 | 0.101165 | -3.20944 | 0.004428 | 0.016939 | -2.26222 |
| PRSS38    | 0.695857 | -0.80899 | 3.297649 | 0.005847 | 0.020774 | -2.26357 |
| C15orf27  | -0.7646  | 0.120563 | -3.21901 | 0.004548 | 0.017288 | -2.26534 |
| PPPDE1    | -1.55513 | 0.43766  | -3.20762 | 0.004446 | 0.017006 | -2.26612 |
| CFC1      | 0.783989 | -0.41953 | 3.20724  | 0.00445  | 0.017014 | -2.26693 |
| TACC3     | -0.55391 | 0.500063 | -3.20706 | 0.004452 | 0.017015 | -2.26732 |
| TIMELESS  | -0.8119  | 0.861341 | -3.20702 | 0.004452 | 0.017015 | -2.26741 |
| SPATA3    | 0.615531 | -0.27103 | 3.206931 | 0.004453 | 0.017016 | -2.2676  |
| FAM193A   | -0.60357 | 0.592367 | -3.20613 | 0.004461 | 0.017043 | -2.26931 |
| GAL       | 0.769451 | -0.33936 | 3.205962 | 0.004463 | 0.017047 | -2.26967 |
| PCDHGB4   | -0.57602 | 0.02102  | -3.20587 | 0.004464 | 0.017047 | -2.26987 |
| GIPC1     | 0.703932 | -0.3056  | 3.205136 | 0.004471 | 0.017072 | -2.27145 |
| NR1H4     | 0.486888 | -0.33669 | 3.215881 | 0.00458  | 0.017375 | -2.27195 |
| CYP17A1   | -0.67024 | 0.189369 | -3.20458 | 0.004477 | 0.017084 | -2.27264 |
| NFS1      | -0.37904 | 0.321324 | -3.20429 | 0.00448  | 0.017091 | -2.27325 |
| C19orf26  | 0.528774 | -0.30476 | 3.203859 | 0.004484 | 0.017105 | -2.27419 |
| OMD       | 0.417464 | -0.09316 | 3.226787 | 0.004713 | 0.017778 | -2.27424 |
| DTWD2     | 0.748998 | -0.50789 | 3.20359  | 0.004487 | 0.017112 | -2.27476 |
| RNF6      | -0.87555 | 0.393656 | -3.20306 | 0.004493 | 0.01713  | -2.2759  |
| ZNF747    | 0.498633 | -0.15292 | 3.201999 | 0.004503 | 0.017164 | -2.27817 |
| RAP2C     | -1.38374 | 0.671659 | -3.202   | 0.004504 | 0.017164 | -2.27818 |
| CCDC3     | 1.537583 | -0.55313 | 3.201849 | 0.004505 | 0.017167 | -2.2785  |
| CDC42EP1  | 0.805539 | -0.0343  | 3.200337 | 0.004521 | 0.017219 | -2.28174 |
| SERINC2   | -1.56304 | 1.199084 | -3.2002  | 0.004522 | 0.017221 | -2.28203 |
| CCDC82    | 0.497344 | -0.46106 | 3.200068 | 0.004523 | 0.017223 | -2.28232 |
| MORN2     | -0.86124 | 0.537653 | -3.19969 | 0.004527 | 0.017235 | -2.28313 |
| ZNF117    | -0.47155 | 0.009021 | -3.19938 | 0.00453  | 0.017242 | -2.2838  |
| AGBL3     | 1.147203 | -0.33899 | 3.199339 | 0.004531 | 0.017242 | -2.28388 |
| PHACTR3   | -0.73153 | 0.353592 | -3.19913 | 0.004533 | 0.017247 | -2.28433 |
| TLX2      | 0.57048  | -0.32513 | 3.199016 | 0.004534 | 0.017247 | -2.28457 |
| LOC400021 | -0.66394 | -0.0205  | -3.19896 | 0.004535 | 0.017247 | -2.2847  |
| CDK14     | -0.97565 | 1.015395 | -3.19844 | 0.00454  | 0.017263 | -2.2858  |
| EFHA2     | -0.76493 | 0.027483 | -3.19767 | 0.004548 | 0.017288 | -2.28745 |
| CHI3L1    | 2.410855 | -0.97044 | 3.197155 | 0.004553 | 0.017304 | -2.28856 |
| KCNG3     | -0.50217 | 0.065157 | -3.19627 | 0.004563 | 0.017336 | -2.29047 |
| WDR34     | -0.81112 | 0.822026 | -3.19608 | 0.004565 | 0.01734  | -2.29087 |

|           |          |          |          |          |          |          |
|-----------|----------|----------|----------|----------|----------|----------|
| ICAM4     | 1.114643 | -0.28908 | 3.195878 | 0.004567 | 0.017344 | -2.2913  |
| NPIPL2    | 0.780608 | -0.16637 | 3.195387 | 0.004572 | 0.01736  | -2.29235 |
| PEPD      | 0.705742 | -0.39992 | 3.195141 | 0.004574 | 0.017367 | -2.29288 |
| POTEF     | -0.92271 | 0.660198 | -3.19482 | 0.004578 | 0.017373 | -2.29357 |
| RCOR3     | -0.59873 | 0.533306 | -3.19473 | 0.004579 | 0.017373 | -2.29376 |
| NFYC      | -0.71875 | 0.700765 | -3.19452 | 0.004581 | 0.017375 | -2.29422 |
| SH2B3     | -0.72841 | 0.881058 | -3.19441 | 0.004582 | 0.017375 | -2.29444 |
| C11orf52  | 0.751616 | -0.32855 | 3.217006 | 0.004816 | 0.018049 | -2.29453 |
| C17orf108 | -1.40012 | 0.992196 | -3.19422 | 0.004584 | 0.01738  | -2.29485 |
| LPAL2     | -0.82897 | 0.261247 | -3.19407 | 0.004586 | 0.017382 | -2.29518 |
| IL11      | 0.964484 | -0.44137 | 3.234787 | 0.005608 | 0.020141 | -2.29539 |
| DNAJC17   | -0.86125 | 0.724254 | -3.19397 | 0.004587 | 0.017383 | -2.2954  |
| OMG       | -1.24752 | 0.296926 | -3.18955 | 0.004858 | 0.018162 | -2.29671 |
| MRPS15    | -0.57023 | 0.369566 | -3.19274 | 0.004599 | 0.017427 | -2.29803 |
| MAGEB2    | 0.610687 | -0.37061 | 3.19186  | 0.004609 | 0.017456 | -2.29991 |
| TMEM220   | 0.852559 | -0.45654 | 3.191796 | 0.004609 | 0.017456 | -2.30005 |
| LOC388241 | 0.580519 | -0.35944 | 3.191405 | 0.004613 | 0.017468 | -2.30089 |
| HACE1     | -1.10195 | 0.163772 | -3.20156 | 0.004729 | 0.017803 | -2.30218 |
| EMBP1     | -1.04471 | 0.022438 | -3.21243 | 0.004864 | 0.018179 | -2.30403 |
| IGLV6-57  | -1.13918 | 1.461554 | -3.18976 | 0.004631 | 0.01753  | -2.30441 |
| LOC100506 | -0.93525 | 0.823937 | -3.18962 | 0.004632 | 0.017532 | -2.30471 |
| LOC407831 | -0.68463 | 0.818426 | -3.18944 | 0.004634 | 0.017536 | -2.3051  |
| PAX6      | 0.659474 | -0.34315 | 3.21187  | 0.00487  | 0.018194 | -2.30518 |
| PCYT1B    | -0.97894 | 0.599345 | -3.18906 | 0.004638 | 0.017548 | -2.30592 |
| SKA3      | -1.13814 | 0.359326 | -3.19966 | 0.004749 | 0.017858 | -2.30617 |
| RASA2     | -1.0648  | 0.515787 | -3.18852 | 0.004644 | 0.017566 | -2.30706 |
| PPM1H     | 0.572096 | -0.39997 | 3.187866 | 0.004651 | 0.017589 | -2.30847 |
| RLF       | -0.60556 | 0.001915 | -3.187   | 0.00466  | 0.01762  | -2.31032 |
| CLIC4     | -1.01817 | 1.001496 | -3.18587 | 0.004672 | 0.017658 | -2.31274 |
| NELL2     | 2.061446 | -1.13881 | 3.185534 | 0.004675 | 0.017664 | -2.31346 |
| ZC3H7A    | -0.73355 | 0.366665 | -3.18541 | 0.004677 | 0.017664 | -2.31372 |
| CNTRL     | -0.91374 | 0.657996 | -3.18538 | 0.004677 | 0.017664 | -2.31379 |
| KL        | -1.15385 | 0.389697 | -3.18533 | 0.004678 | 0.017664 | -2.31391 |
| MOGAT3    | 0.577603 | -0.42051 | 3.185311 | 0.004678 | 0.017664 | -2.31394 |
| ZNFX1     | -0.87285 | 0.957684 | -3.18512 | 0.00468  | 0.017668 | -2.31435 |
| KMO       | -0.8337  | 0.331375 | -3.18452 | 0.004686 | 0.017689 | -2.31563 |
| ZXDA      | -0.46664 | 0.154514 | -3.18406 | 0.004691 | 0.017704 | -2.31661 |
| PDZD3     | 0.557599 | -0.21219 | 3.179525 | 0.004968 | 0.018464 | -2.31776 |
| RIMS2     | 0.752955 | -0.26495 | 3.182479 | 0.004708 | 0.017762 | -2.32001 |
| SMC5      | -0.89373 | 0.370394 | -3.18244 | 0.004708 | 0.017762 | -2.32008 |
| LIPG      | -0.90206 | 0.373643 | -3.19246 | 0.004827 | 0.018073 | -2.32137 |
| DMAP1     | -0.54973 | 0.318968 | -3.18177 | 0.004716 | 0.017783 | -2.32151 |
| CXADR     | -0.8123  | 0.156026 | -3.18164 | 0.004717 | 0.017785 | -2.32181 |
| COL9A3    | -1.39953 | 1.008817 | -3.18127 | 0.004721 | 0.017796 | -2.3226  |
| LINS      | -0.84685 | 0.125215 | -3.18096 | 0.004724 | 0.017799 | -2.32325 |
| CHRNA1    | 0.572198 | -0.19517 | 3.180919 | 0.004725 | 0.017799 | -2.32334 |
| HILS1     | 0.714456 | -0.45604 | 3.180741 | 0.004727 | 0.017799 | -2.32373 |

|           |          |          |          |          |          |          |
|-----------|----------|----------|----------|----------|----------|----------|
| ARTN      | 0.690034 | -0.39543 | 3.180728 | 0.004727 | 0.017799 | -2.32375 |
| CUEDC2    | -0.42296 | 0.300881 | -3.18071 | 0.004727 | 0.017799 | -2.3238  |
| SRGN      | -2.01314 | 1.168091 | -3.18069 | 0.004727 | 0.017799 | -2.32384 |
| ACHE      | 0.773832 | -0.45917 | 3.180435 | 0.00473  | 0.017803 | -2.32438 |
| ZNF768    | -0.8669  | 0.915688 | -3.18027 | 0.004732 | 0.017806 | -2.32472 |
| PITPNM1   | -0.91916 | 0.756762 | -3.18007 | 0.004734 | 0.017811 | -2.32516 |
| CHST7     | 0.987653 | -0.15092 | 3.17908  | 0.004745 | 0.017847 | -2.32728 |
| HPN       | -1.34263 | 1.338216 | -3.17859 | 0.00475  | 0.017858 | -2.32833 |
| ATL2      | -1.62401 | 0.40636  | -3.17856 | 0.00475  | 0.017858 | -2.32839 |
| UBL5      | -0.76326 | 0.205499 | -3.17846 | 0.004751 | 0.017859 | -2.3286  |
| HRH2      | 0.899038 | -0.37793 | 3.178333 | 0.004753 | 0.01786  | -2.32888 |
| ATP6      | 1.078471 | -0.34047 | 3.177716 | 0.004759 | 0.017879 | -2.3302  |
| CLSTN3    | -0.9199  | 0.664763 | -3.1775  | 0.004762 | 0.017884 | -2.33066 |
| LRRC8C    | -1.12152 | 0.405023 | -3.17728 | 0.004764 | 0.017886 | -2.33113 |
| FAM91A1   | -1.12514 | 0.333527 | -3.17727 | 0.004764 | 0.017886 | -2.33115 |
| PLEKHM1   | -0.81485 | 0.604923 | -3.1772  | 0.004765 | 0.017886 | -2.3313  |
| ATP1B4    | 1.12152  | -0.58275 | 3.175756 | 0.005919 | 0.020939 | -2.3325  |
| CBX4      | -0.5542  | 0.628819 | -3.17657 | 0.004772 | 0.017908 | -2.33266 |
| EXOC1     | -1.30308 | 0.79097  | -3.17645 | 0.004773 | 0.017909 | -2.3329  |
| NCOA7     | -1.42912 | 0.289124 | -3.17592 | 0.004779 | 0.017928 | -2.33405 |
| SYT15     | 0.595765 | -0.16813 | 3.175588 | 0.004782 | 0.017938 | -2.33475 |
| TAOK3     | -0.77512 | 0.800752 | -3.17414 | 0.004798 | 0.017994 | -2.33785 |
| FAM71F1   | 0.770792 | -0.50357 | 3.183081 | 0.004929 | 0.018356 | -2.34112 |
| LOC100128 | 0.852077 | -0.17081 | 3.172562 | 0.004815 | 0.018049 | -2.34123 |
| CACNA1C   | -0.72523 | 0.093738 | -3.17253 | 0.004816 | 0.018049 | -2.34129 |
| EID1      | -0.71664 | 0.225108 | -3.17196 | 0.004822 | 0.018069 | -2.34252 |
| AGTRAP    | -0.95493 | 0.466385 | -3.17183 | 0.004823 | 0.018071 | -2.34278 |
| SDF2L1    | 0.652867 | -0.22744 | 3.171598 | 0.004826 | 0.018073 | -2.34329 |
| CNTN3     | -0.66019 | 0.010109 | -3.17153 | 0.004827 | 0.018073 | -2.34344 |
| KARS      | -0.78824 | 0.538609 | -3.17124 | 0.00483  | 0.018081 | -2.34406 |
| GPR63     | 0.510298 | -0.38582 | 3.171023 | 0.004832 | 0.018087 | -2.34452 |
| ZWINT     | -1.58176 | 1.092352 | -3.17059 | 0.004837 | 0.018101 | -2.34545 |
| HCK       | -1.14375 | 0.699224 | -3.17008 | 0.004843 | 0.018119 | -2.34654 |
| TXNDC15   | -0.54782 | 0.275245 | -3.16946 | 0.00485  | 0.018141 | -2.34786 |
| ST6GALNA  | 0.851748 | -0.23866 | 3.168976 | 0.004855 | 0.018157 | -2.3489  |
| FAM83H    | -0.58107 | 0.215596 | -3.16887 | 0.004856 | 0.018158 | -2.34913 |
| ZNF200    | -0.89716 | 0.419412 | -3.16857 | 0.004859 | 0.018164 | -2.34976 |
| SOCS6     | -0.54791 | 0.060406 | -3.16788 | 0.004867 | 0.018185 | -2.35125 |
| CCP110    | -0.90817 | 0.116043 | -3.16749 | 0.004871 | 0.018194 | -2.35207 |
| CNOT2     | -0.40608 | 0.342892 | -3.16735 | 0.004873 | 0.018197 | -2.35238 |
| LINC00238 | -0.77979 | 0.199461 | -3.17737 | 0.004992 | 0.018524 | -2.35314 |
| CCNC      | -1.07525 | 0.045407 | -3.17393 | 0.005292 | 0.019302 | -2.35497 |
| ZNF157    | 0.728332 | -0.29245 | 3.166101 | 0.004887 | 0.018245 | -2.35504 |
| SLC7A4    | 0.637137 | -0.4279  | 3.165806 | 0.00489  | 0.018253 | -2.35567 |
| C22orf43  | -0.54864 | 0.376865 | -3.16575 | 0.004891 | 0.018253 | -2.35579 |
| RBM6      | -0.72421 | 0.545667 | -3.16478 | 0.004901 | 0.018286 | -2.35786 |
| COMMD7    | -0.47534 | 0.29981  | -3.16475 | 0.004902 | 0.018286 | -2.35794 |

|           |          |          |          |          |          |          |
|-----------|----------|----------|----------|----------|----------|----------|
| ANKHD1    | -1.54727 | 1.30945  | -3.16469 | 0.004902 | 0.018286 | -2.35805 |
| SIGLEC6   | -0.91359 | 0.5654   | -3.16373 | 0.004913 | 0.018319 | -2.36011 |
| BLM       | -1.07529 | 0.382993 | -3.16329 | 0.004918 | 0.018333 | -2.36104 |
| ORMDL2    | -0.60264 | 0.204248 | -3.16323 | 0.004919 | 0.018333 | -2.36117 |
| MBOAT2    | -1.36684 | 0.569754 | -3.16306 | 0.004921 | 0.018337 | -2.36154 |
| C14orf102 | -0.67075 | 0.779294 | -3.16272 | 0.004924 | 0.018347 | -2.36228 |
| LOC100501 | 0.775231 | -0.37477 | 3.184287 | 0.005174 | 0.018993 | -2.3623  |
| ALCAM     | -1.08513 | 0.30327  | -3.16233 | 0.004929 | 0.018356 | -2.36309 |
| LAMA5     | 0.731908 | -0.25741 | 3.161932 | 0.004933 | 0.01837  | -2.36395 |
| ARSG      | 0.495362 | -0.23438 | 3.161561 | 0.004937 | 0.01838  | -2.36474 |
| FIP1L1    | -0.43575 | 0.524978 | -3.16152 | 0.004938 | 0.01838  | -2.36483 |
| ALDH6A1   | -0.46585 | 0.416513 | -3.16087 | 0.004945 | 0.018402 | -2.36622 |
| BTNL2     | 0.515075 | -0.23622 | 3.160814 | 0.004946 | 0.018402 | -2.36634 |
| TP53TG5   | 1.292585 | -0.26352 | 3.168413 | 0.005357 | 0.01947  | -2.36634 |
| SCRN3     | -1.64868 | 0.692949 | -3.1605  | 0.004949 | 0.018412 | -2.36702 |
| PIGH      | -0.60084 | 0.241332 | -3.16022 | 0.004952 | 0.01842  | -2.36761 |
| SYT9      | 0.76154  | -0.24716 | 3.159347 | 0.004962 | 0.018453 | -2.36947 |
| ZEB2      | -0.83273 | 0.056406 | -3.159   | 0.004966 | 0.018464 | -2.37021 |
| PUS7L     | -0.92261 | 0.00209  | -3.15882 | 0.004968 | 0.018464 | -2.37059 |
| MGC39584  | -0.95914 | 0.177612 | -3.1587  | 0.00497  | 0.018464 | -2.37086 |
| PGLYRP3   | 0.824418 | -0.48787 | 3.15868  | 0.00497  | 0.018464 | -2.3709  |
| TMEM180   | -0.54762 | 0.380189 | -3.15854 | 0.004971 | 0.018466 | -2.37119 |
| OLFM3     | 0.958083 | -0.47086 | 3.167973 | 0.005098 | 0.018799 | -2.37292 |
| SULT1C2   | 0.995688 | -0.35398 | 3.167868 | 0.005099 | 0.018799 | -2.37314 |
| CCDC144A  | 0.548644 | -0.33939 | 3.157571 | 0.004982 | 0.0185   | -2.37327 |
| OSTCP1    | 0.756345 | -0.17641 | 3.15757  | 0.004982 | 0.0185   | -2.37327 |
| FLJ31356  | 0.735785 | -0.22657 | 3.157043 | 0.004988 | 0.018515 | -2.37439 |
| MED24     | 0.934646 | -0.22745 | 3.156673 | 0.004992 | 0.018524 | -2.37518 |
| GLYATL2   | 0.38478  | -0.33132 | 3.155929 | 0.005001 | 0.018551 | -2.37677 |
| FXVD2     | 0.76278  | -0.43467 | 3.155459 | 0.005006 | 0.018565 | -2.37778 |
| ZMYND17   | -0.91879 | 0.238806 | -3.15543 | 0.005007 | 0.018565 | -2.37784 |
| SLC4A10   | 0.96929  | 0.026977 | 3.162784 | 0.005423 | 0.019653 | -2.37794 |
| SYMPK     | 0.56481  | -0.25354 | 3.155218 | 0.005009 | 0.018569 | -2.37829 |
| MTRF1     | -0.8438  | 0.510003 | -3.15517 | 0.00501  | 0.018569 | -2.37839 |
| ZNF124    | -1.35003 | 0.477245 | -3.16246 | 0.005427 | 0.019659 | -2.37861 |
| CDS1      | -0.47675 | -0.00602 | -3.15499 | 0.005012 | 0.018573 | -2.37878 |
| ITPRIPL1  | 0.53968  | 0.101051 | 3.154699 | 0.005015 | 0.018582 | -2.3794  |
| FCRLA     | -1.72383 | 1.516327 | -3.15377 | 0.005025 | 0.018618 | -2.38138 |
| ZBTB80S   | -0.99958 | 0.215616 | -3.15368 | 0.005027 | 0.018618 | -2.38158 |
| ABHD13    | -1.21348 | 0.249057 | -3.15361 | 0.005027 | 0.018618 | -2.38172 |
| MTCP1     | -1.00982 | 0.661019 | -3.15328 | 0.005031 | 0.018628 | -2.38244 |
| FOXD1     | 0.855039 | -0.43577 | 3.153039 | 0.005034 | 0.018635 | -2.38294 |
| GLRX      | -1.37915 | 0.415141 | -3.15295 | 0.005035 | 0.018635 | -2.38314 |
| CTAGE3P   | -0.44669 | 0.103855 | -3.16293 | 0.005156 | 0.018949 | -2.38352 |
| TJP1      | -0.74095 | 0.369824 | -3.15234 | 0.005042 | 0.018657 | -2.38443 |
| MSRA      | -1.20031 | 0.523064 | -3.15215 | 0.005044 | 0.01866  | -2.38483 |
| COX4I2    | 0.489064 | -0.30983 | 3.152068 | 0.005045 | 0.01866  | -2.38502 |

|           |          |          |          |          |          |          |
|-----------|----------|----------|----------|----------|----------|----------|
| IYD       | 0.646022 | -0.39881 | 3.152026 | 0.005045 | 0.01866  | -2.38511 |
| CORO6     | -0.93405 | 0.134363 | -3.15166 | 0.00505  | 0.018667 | -2.3859  |
| GPBAR1    | 1.352652 | -0.34994 | 3.151627 | 0.00505  | 0.018667 | -2.38596 |
| GGNBP2    | -0.80883 | 0.909616 | -3.15161 | 0.00505  | 0.018667 | -2.38599 |
| PLEKHJ1   | -0.6116  | 0.432058 | -3.15022 | 0.005066 | 0.018722 | -2.38895 |
| SERPINB10 | -1.90769 | 0.794783 | -3.15952 | 0.005195 | 0.019045 | -2.39069 |
| CD300A    | -0.84936 | 0.617591 | -3.14921 | 0.005078 | 0.018762 | -2.39112 |
| MCTS1     | -0.90723 | 0.397094 | -3.14912 | 0.005079 | 0.018762 | -2.39131 |
| SPAG9     | -0.7495  | 0.453066 | -3.14856 | 0.005085 | 0.018782 | -2.39249 |
| KLC2      | 0.623813 | -0.44047 | 3.148358 | 0.005088 | 0.018788 | -2.39293 |
| KIAA1908  | -0.61398 | 0.362997 | -3.14823 | 0.005089 | 0.01879  | -2.39322 |
| CACNA1H   | 0.677001 | -0.26071 | 3.14783  | 0.005094 | 0.018799 | -2.39406 |
| EFHA1     | -0.94142 | 0.054319 | -3.1478  | 0.005094 | 0.018799 | -2.39413 |
| C10orf92  | 1.079506 | -0.34241 | 3.147552 | 0.005097 | 0.018799 | -2.39466 |
| A2ML1     | 0.494462 | -0.35649 | 3.147527 | 0.005097 | 0.018799 | -2.39471 |
| ATOH8     | 1.153009 | -0.4636  | 3.147459 | 0.005098 | 0.018799 | -2.39485 |
| ORC4      | -1.06424 | 0.359781 | -3.14735 | 0.005099 | 0.018799 | -2.39508 |
| HS3ST5    | -1.03599 | 0.267127 | -3.14705 | 0.005103 | 0.018808 | -2.39574 |
| CHRNA3    | 0.799213 | -0.43909 | 3.146956 | 0.005104 | 0.018808 | -2.39593 |
| GLCC1     | 0.6483   | -0.28095 | 3.146499 | 0.005109 | 0.018824 | -2.3969  |
| HSF1      | -0.40104 | 0.471723 | -3.14633 | 0.005111 | 0.018828 | -2.39726 |
| RPL8      | 1.191398 | -0.82818 | 3.146089 | 0.005114 | 0.018835 | -2.39778 |
| HORMAD1   | -1.66765 | 1.275632 | -3.14599 | 0.005115 | 0.018836 | -2.39799 |
| SLC25A14  | -0.37827 | -0.01711 | -3.14533 | 0.005123 | 0.018858 | -2.3994  |
| ZNF671    | -0.51576 | 0.400077 | -3.1453  | 0.005123 | 0.018858 | -2.39945 |
| FNDC3A    | -1.19437 | 0.183715 | -3.14487 | 0.005128 | 0.018873 | -2.40037 |
| PPP1R9B   | 0.735828 | -0.08769 | 3.144752 | 0.005129 | 0.018874 | -2.40063 |
| TM9SF1    | -0.51474 | 0.457924 | -3.14463 | 0.005131 | 0.018875 | -2.40089 |
| C5orf27   | 0.693957 | -0.38849 | 3.144575 | 0.005131 | 0.018875 | -2.40101 |
| ALLC      | -1.04472 | 0.191749 | -3.14446 | 0.005133 | 0.018876 | -2.40125 |
| C1orf192  | 0.799881 | -0.23453 | 3.144314 | 0.005135 | 0.018879 | -2.40156 |
| RAD52     | 0.612981 | -0.06646 | 3.14358  | 0.005143 | 0.018907 | -2.40313 |
| PGBD4     | 0.772366 | -0.37179 | 3.141614 | 0.005166 | 0.018982 | -2.40732 |
| TMEM160   | 0.717829 | -0.49433 | 3.141546 | 0.005167 | 0.018982 | -2.40747 |
| CALML6    | 0.759063 | -0.12345 | 3.141512 | 0.005167 | 0.018982 | -2.40754 |
| CUL7      | -0.54007 | 0.432905 | -3.14142 | 0.005168 | 0.018982 | -2.40774 |
| ARPC1B    | -0.54183 | 0.446516 | -3.14104 | 0.005173 | 0.018993 | -2.40855 |
| ERMN      | -0.7923  | 0.212092 | -3.1409  | 0.005175 | 0.018993 | -2.40885 |
| POTEKP    | -0.84748 | 0.691406 | -3.14083 | 0.005175 | 0.018993 | -2.409   |
| DTD1      | 0.675801 | -0.31029 | 3.140152 | 0.005183 | 0.019019 | -2.41044 |
| FAM118B   | -1.30185 | 0.667568 | -3.13993 | 0.005186 | 0.019025 | -2.41091 |
| ING4      | -0.48848 | 0.197823 | -3.13953 | 0.005191 | 0.019039 | -2.41177 |
| ST6GALNA  | -0.91962 | 0.267246 | -3.13912 | 0.005195 | 0.019045 | -2.41265 |
| C1orf187  | 0.695104 | -0.75083 | 3.139101 | 0.005196 | 0.019045 | -2.41268 |
| CTXN1     | 0.609162 | -0.32718 | 3.139056 | 0.005196 | 0.019045 | -2.41278 |
| NUP37     | -0.6362  | 0.13853  | -3.13865 | 0.005201 | 0.019059 | -2.41363 |
| GLI4      | -0.5609  | 0.659811 | -3.13844 | 0.005203 | 0.019061 | -2.41408 |

|           |          |          |          |          |          |          |
|-----------|----------|----------|----------|----------|----------|----------|
| FBXL21    | -0.92063 | 0.178494 | -3.13844 | 0.005203 | 0.019061 | -2.41409 |
| MAP1LC3B  | -0.86976 | 0.406944 | -3.13836 | 0.005204 | 0.019061 | -2.41426 |
| FAM9B     | -0.73222 | 0.216531 | -3.13797 | 0.005209 | 0.019074 | -2.41509 |
| BPHL      | 0.693468 | -0.39583 | 3.137839 | 0.005211 | 0.019076 | -2.41537 |
| PRO2852   | -1.31527 | 0.903877 | -3.13774 | 0.005212 | 0.019077 | -2.41559 |
| PRKCH     | 1.326966 | -0.78659 | 3.137397 | 0.005216 | 0.019088 | -2.41631 |
| DGKD      | -0.64691 | 0.496528 | -3.13715 | 0.005219 | 0.019095 | -2.41685 |
| BAI3      | -0.63183 | -0.05799 | -3.14691 | 0.005343 | 0.01943  | -2.41717 |
| ARHGEF2   | -0.62866 | 0.636323 | -3.13689 | 0.005222 | 0.019103 | -2.4174  |
| CELF2     | -0.78954 | 0.589486 | -3.1368  | 0.005223 | 0.019103 | -2.41759 |
| EZH2      | -0.77742 | 0.49937  | -3.13603 | 0.005232 | 0.019133 | -2.41922 |
| EVI5      | 0.751954 | -0.17325 | 3.145499 | 0.00536  | 0.019472 | -2.42014 |
| EDN3      | 1.15748  | -0.30884 | 3.135313 | 0.00524  | 0.019161 | -2.42075 |
| PIWIL2    | 1.559963 | -0.2688  | 3.135052 | 0.005244 | 0.019168 | -2.42131 |
| CDCA7     | -1.59183 | 1.003175 | -3.13499 | 0.005244 | 0.019168 | -2.42144 |
| AIRE      | 0.64074  | -0.29576 | 3.134666 | 0.005248 | 0.019178 | -2.42213 |
| FBXO21    | 0.72661  | -0.5279  | 3.13433  | 0.005252 | 0.019185 | -2.42285 |
| SLC23A3   | -0.82824 | 0.837192 | -3.13426 | 0.005253 | 0.019185 | -2.42299 |
| LOC64345  | -1.12062 | 0.599885 | -3.13425 | 0.005253 | 0.019185 | -2.42302 |
| NAIF1     | -0.54463 | 0.450442 | -3.13387 | 0.005258 | 0.019198 | -2.42384 |
| C15orf60  | -1.09603 | 0.167921 | -3.13374 | 0.005259 | 0.0192   | -2.42411 |
| RPL32     | 1.233505 | -0.78372 | 3.133315 | 0.005264 | 0.019215 | -2.42501 |
| STIM2     | -0.81924 | 0.792921 | -3.13298 | 0.005268 | 0.019226 | -2.42571 |
| MAP6D1    | -0.56041 | 0.274124 | -3.1316  | 0.005285 | 0.019283 | -2.42866 |
| PLDN      | -0.80496 | 0.543901 | -3.13124 | 0.005289 | 0.019295 | -2.42943 |
| BCL2A1    | -0.95279 | 0.37441  | -3.13093 | 0.005293 | 0.019302 | -2.43009 |
| LINC00442 | 0.64368  | -0.31368 | 3.130467 | 0.005298 | 0.019315 | -2.43108 |
| DIO2      | 0.650219 | -0.34671 | 3.130465 | 0.005298 | 0.019315 | -2.43108 |
| HIP1      | -1.4811  | 1.116131 | -3.13021 | 0.005301 | 0.019322 | -2.43163 |
| SLC22A12  | 0.550495 | -0.39103 | 3.129596 | 0.005309 | 0.019346 | -2.43293 |
| KRR1      | -1.11446 | 0.522213 | -3.13938 | 0.005434 | 0.019661 | -2.43298 |
| IGHD      | -0.92597 | 0.906563 | -3.12948 | 0.00531  | 0.019347 | -2.43317 |
| ITGB6     | 0.819327 | -0.45457 | 3.124035 | 0.005622 | 0.02017  | -2.43395 |
| MAP4      | -0.9052  | 0.682694 | -3.12885 | 0.005318 | 0.019371 | -2.43452 |
| SWAP70    | -0.95309 | 0.539406 | -3.12868 | 0.00532  | 0.019375 | -2.43489 |
| PRAMEF3   | -0.88595 | -0.03768 | -3.12826 | 0.005325 | 0.01939  | -2.43577 |
| SERINC1   | -0.76192 | 0.267764 | -3.12307 | 0.005635 | 0.020202 | -2.43595 |
| ALKBH4    | -0.55584 | 0.476667 | -3.12794 | 0.005329 | 0.0194   | -2.43646 |
| PIK3R6    | -1.18833 | 1.071029 | -3.12756 | 0.005333 | 0.019413 | -2.43726 |
| TMEM171   | 0.643755 | -0.39422 | 3.127257 | 0.005337 | 0.019423 | -2.43791 |
| ZNF44     | -1.2146  | 0.944058 | -3.12692 | 0.005341 | 0.01943  | -2.43864 |
| CHAF1B    | -0.7074  | 0.515445 | -3.1269  | 0.005341 | 0.01943  | -2.43868 |
| TMEM107   | -1.20358 | 0.765056 | -3.12681 | 0.005342 | 0.01943  | -2.43886 |
| H1FNT     | 0.547235 | -0.40816 | 3.125977 | 0.005353 | 0.019462 | -2.44064 |
| ADD2      | -1.0236  | 0.346828 | -3.12578 | 0.005355 | 0.019467 | -2.44106 |
| GTSE1     | -0.95104 | 0.936569 | -3.12547 | 0.005359 | 0.019472 | -2.44173 |
| EEF2      | 0.808476 | -0.43077 | 3.125335 | 0.00536  | 0.019472 | -2.44201 |

|           |          |          |          |          |          |          |
|-----------|----------|----------|----------|----------|----------|----------|
| RNF115    | -0.51961 | 0.468085 | -3.12518 | 0.005362 | 0.019475 | -2.44233 |
| APAF1     | -1.22801 | 0.812715 | -3.12493 | 0.005365 | 0.019482 | -2.44286 |
| WDR16     | -0.96191 | 0.196232 | -3.13403 | 0.005499 | 0.019837 | -2.44421 |
| CCDC41    | -0.70528 | 0.315555 | -3.12355 | 0.005382 | 0.01954  | -2.44581 |
| AZI2      | -1.4131  | 0.684459 | -3.12303 | 0.005388 | 0.019559 | -2.44691 |
| FLRT3     | -1.14922 | 0.154577 | -3.12252 | 0.005395 | 0.019578 | -2.448   |
| PGAP3     | 0.75318  | -0.33201 | 3.122265 | 0.005398 | 0.019586 | -2.44854 |
| SPACA4    | 0.36399  | -0.27979 | 3.131951 | 0.005524 | 0.019901 | -2.44856 |
| RNF19A    | -1.02601 | 0.415345 | -3.12158 | 0.005406 | 0.019612 | -2.45    |
| DPM1      | -1.12465 | 0.153649 | -3.12151 | 0.005407 | 0.019612 | -2.45015 |
| LOC100506 | -1.98262 | 1.38795  | -3.12135 | 0.005409 | 0.019616 | -2.45049 |
| C4orf19   | 0.643951 | -0.2876  | 3.108448 | 0.006107 | 0.02146  | -2.45187 |
| PHF13     | 0.553761 | -0.31998 | 3.120589 | 0.005418 | 0.019646 | -2.45211 |
| SPAG7     | -0.78543 | 0.462087 | -3.12036 | 0.005421 | 0.01965  | -2.4526  |
| AGK       | -0.8868  | -0.0376  | -3.12034 | 0.005421 | 0.01965  | -2.45264 |
| TEX13A    | 1.1583   | -0.59748 | 3.119944 | 0.005426 | 0.019659 | -2.45348 |
| KRTAP4-1  | -0.80301 | -0.02611 | -3.11953 | 0.005431 | 0.019661 | -2.45436 |
| UBE2A     | -0.43397 | 0.005244 | -3.11953 | 0.005431 | 0.019661 | -2.45437 |
| ZNF646    | -0.85532 | 0.626778 | -3.11947 | 0.005432 | 0.019661 | -2.45449 |
| BSN-AS2   | 0.43841  | -0.09737 | 3.119418 | 0.005433 | 0.019661 | -2.4546  |
| FOXO4     | -1.07239 | 0.72755  | -3.11935 | 0.005434 | 0.019661 | -2.45474 |
| CDIPT     | -0.65339 | 0.597164 | -3.11905 | 0.005437 | 0.019671 | -2.45539 |
| IGF1R     | -1.15662 | 1.092854 | -3.11897 | 0.005438 | 0.019671 | -2.45556 |
| TSPAN4    | 0.820853 | -0.35833 | 3.118649 | 0.005442 | 0.019681 | -2.45623 |
| LOC100291 | 1.058218 | -0.09001 | 3.124511 | 0.005897 | 0.020892 | -2.45662 |
| LITAF     | -1.24454 | 1.004909 | -3.11845 | 0.005445 | 0.019686 | -2.45665 |
| DNAJB5    | 0.597601 | -0.35836 | 3.118249 | 0.005447 | 0.01969  | -2.45708 |
| H2AFY2    | 0.802675 | -0.32512 | 3.118212 | 0.005448 | 0.01969  | -2.45716 |
| TNFSF13   | -1.14758 | 0.805634 | -3.11796 | 0.005451 | 0.019697 | -2.45769 |
| SPATA24   | 0.55254  | -0.20923 | 3.117686 | 0.005454 | 0.019699 | -2.45828 |
| TRIM25    | -1.57209 | 0.778547 | -3.11769 | 0.005454 | 0.019699 | -2.45828 |
| PKP1      | 0.608829 | -0.28338 | 3.117678 | 0.005454 | 0.019699 | -2.4583  |
| RNF19B    | -1.16782 | 1.026473 | -3.1162  | 0.005473 | 0.019762 | -2.46145 |
| CHEK1     | -1.4024  | 1.113998 | -3.1161  | 0.005474 | 0.019762 | -2.46165 |
| POM121L4  | -0.96584 | 0.352997 | -3.11568 | 0.005479 | 0.019778 | -2.46255 |
| LIN28A    | 1.425181 | -0.41324 | 3.163099 | 0.006491 | 0.02248  | -2.4628  |
| TMEM2     | -1.06286 | 0.715385 | -3.11555 | 0.005481 | 0.01978  | -2.46283 |
| LOC100651 | 0.932381 | -0.31418 | 3.109709 | 0.005805 | 0.020664 | -2.46385 |
| TRAPPC4   | -0.62325 | 0.416479 | -3.11423 | 0.005497 | 0.019835 | -2.46563 |
| ALS2CR12  | 1.150655 | -0.35379 | 3.114025 | 0.005499 | 0.019837 | -2.46607 |
| TBK1      | -0.94642 | 0.214392 | -3.11357 | 0.005505 | 0.019854 | -2.46705 |
| AP1B1     | -1.04834 | 1.127824 | -3.11332 | 0.005508 | 0.019862 | -2.46756 |
| BEAN1     | 1.023024 | -0.37713 | 3.119106 | 0.005967 | 0.021077 | -2.46771 |
| SCG2      | 1.055199 | -0.24161 | 3.119084 | 0.005967 | 0.021077 | -2.46775 |
| HSBP1     | -0.79059 | 0.52912  | -3.11284 | 0.005514 | 0.01988  | -2.46859 |
| ZDHHC5    | 0.507693 | -0.26703 | 3.112402 | 0.00552  | 0.019893 | -2.46952 |
| GPC6      | -1.13665 | 0.362461 | -3.11237 | 0.00552  | 0.019893 | -2.46958 |



|          |          |          |          |          |          |          |
|----------|----------|----------|----------|----------|----------|----------|
| VPS11    | -0.53252 | 0.507141 | -3.11209 | 0.005524 | 0.019901 | -2.47019 |
| PKD1L1   | -0.92728 | 0.178461 | -3.11196 | 0.005525 | 0.019901 | -2.47046 |
| WISP2    | 0.477537 | -0.38572 | 3.111832 | 0.005527 | 0.019903 | -2.47073 |
| XRCC3    | 0.51484  | -0.41224 | 3.111743 | 0.005528 | 0.019904 | -2.47092 |
| ZNF281   | -0.99694 | 0.426773 | -3.11142 | 0.005532 | 0.019914 | -2.47161 |
| CLDN10   | 0.794247 | -0.2449  | 3.11069  | 0.005541 | 0.019944 | -2.47316 |
| ZNF169   | 1.237765 | -0.66817 | 3.130333 | 0.005822 | 0.020711 | -2.47366 |
| AHSA2    | -1.01616 | 0.367429 | -3.10979 | 0.005552 | 0.019981 | -2.47507 |
| CLCA4    | 0.655736 | -0.31633 | 3.104275 | 0.005875 | 0.020844 | -2.47518 |
| FAM125A  | -0.48897 | 0.520333 | -3.10929 | 0.005559 | 0.019996 | -2.47613 |
| C1orf86  | -0.62895 | 0.637437 | -3.10929 | 0.005559 | 0.019996 | -2.47614 |
| DLAT     | 0.513839 | -0.41111 | 3.108423 | 0.00557  | 0.020032 | -2.47798 |
| COPS3    | 0.462814 | -0.54546 | 3.108142 | 0.005573 | 0.020041 | -2.47857 |
| PPP2R5A  | -0.85554 | 0.376958 | -3.10781 | 0.005577 | 0.020052 | -2.47928 |
| KIAA0355 | 0.805474 | -0.41629 | 3.101968 | 0.005905 | 0.020913 | -2.47999 |
| NAMPT    | -1.67321 | 0.845668 | -3.10731 | 0.005584 | 0.020071 | -2.48035 |
| FBXO9    | -1.51915 | 0.608418 | -3.10721 | 0.005585 | 0.020072 | -2.48056 |
| ZNF69    | 0.714793 | -0.18866 | 3.106456 | 0.005595 | 0.020103 | -2.48216 |
| MYO1G    | -0.87153 | 0.517651 | -3.10627 | 0.005597 | 0.020107 | -2.48255 |
| HOGA1    | 0.90016  | -0.3415  | 3.115641 | 0.005729 | 0.020456 | -2.48272 |
| ZNF415   | -1.08004 | 0.56267  | -3.12552 | 0.005883 | 0.020864 | -2.48356 |
| PLA2G6   | -0.57811 | 0.356527 | -3.1055  | 0.005607 | 0.020139 | -2.48419 |
| PTPRC    | -1.05988 | 0.407044 | -3.10519 | 0.005611 | 0.020145 | -2.48484 |
| SH3RF2   | 0.688578 | -0.19596 | 3.104657 | 0.005617 | 0.020166 | -2.48598 |
| ZNF831   | 1.174566 | -0.78261 | 3.104498 | 0.005619 | 0.02017  | -2.48632 |
| HENMT1   | -0.7052  | 0.062003 | -3.10432 | 0.005622 | 0.02017  | -2.48669 |
| VNN2     | -1.37669 | 0.705305 | -3.10427 | 0.005622 | 0.02017  | -2.4868  |
| MFI2-AS1 | 0.849259 | -0.12063 | 3.123837 | 0.005905 | 0.020913 | -2.48703 |
| USP11    | 0.758709 | -0.20608 | 3.103442 | 0.005633 | 0.020202 | -2.48856 |
| CEP192   | -0.86969 | 0.538298 | -3.10332 | 0.005634 | 0.020202 | -2.48882 |
| UMODL1   | -0.79271 | 0.173016 | -3.10292 | 0.00564  | 0.020216 | -2.48967 |
| ABCD3    | -0.96421 | 0.091114 | -3.10234 | 0.005647 | 0.020239 | -2.49091 |
| KLHDC10  | -0.82049 | 0.388408 | -3.10198 | 0.005651 | 0.020251 | -2.49166 |
| HLA-DRB5 | 1.0418   | -0.43986 | 3.101643 | 0.005656 | 0.020263 | -2.49238 |
| LDLR     | -1.19445 | 1.091275 | -3.10097 | 0.005664 | 0.02029  | -2.49382 |
| TAC3     | 0.549362 | -0.3212  | 3.100902 | 0.005665 | 0.02029  | -2.49395 |
| SYNJ1    | -0.59347 | 0.314286 | -3.10049 | 0.005671 | 0.020305 | -2.49482 |
| SYT12    | 0.650132 | -0.11962 | 3.100317 | 0.005673 | 0.020309 | -2.4952  |
| PRKCB    | -0.84827 | 0.810943 | -3.1     | 0.005677 | 0.02032  | -2.49587 |
| THNSL1   | -0.53757 | 0.221645 | -3.09962 | 0.005682 | 0.020334 | -2.49667 |
| FGD4     | -2.22142 | 0.984061 | -3.09944 | 0.005684 | 0.020336 | -2.49706 |
| PTCH1    | 0.448783 | -0.55925 | 3.099411 | 0.005684 | 0.020336 | -2.49712 |
| GGTLC2   | -0.99603 | 0.683152 | -3.0993  | 0.005686 | 0.020337 | -2.49735 |
| CCR9     | 0.987086 | -0.24084 | 3.1167   | 0.006322 | 0.022058 | -2.49755 |
| RAPGEF4  | -0.5719  | 0.309219 | -3.09725 | 0.005712 | 0.020425 | -2.50171 |
| CD5      | 1.243212 | -0.4515  | 3.097194 | 0.005713 | 0.020425 | -2.50183 |
| GPSM2    | -1.05987 | 0.644203 | -3.09716 | 0.005714 | 0.020425 | -2.50191 |

|           |          |          |          |          |          |          |
|-----------|----------|----------|----------|----------|----------|----------|
| LMCD1     | 0.653572 | -0.14015 | 3.09708  | 0.005714 | 0.020425 | -2.50207 |
| PYCR1     | -0.77713 | 0.837839 | -3.09683 | 0.005718 | 0.020432 | -2.5026  |
| RELN      | -0.82808 | 0.164946 | -3.09676 | 0.005719 | 0.020432 | -2.50275 |
| ENY2      | -0.86848 | 0.113056 | -3.09648 | 0.005722 | 0.020441 | -2.50334 |
| PCGF2     | 0.607991 | -0.43823 | 3.096163 | 0.005726 | 0.020452 | -2.50402 |
| COASY     | -0.6305  | 0.519163 | -3.09573 | 0.005732 | 0.020465 | -2.50494 |
| ZNF517    | 1.55497  | -1.08069 | 3.071969 | 0.006956 | 0.023675 | -2.50565 |
| LOC100507 | -0.82846 | 0.432043 | -3.09528 | 0.005738 | 0.020482 | -2.5059  |
| NEFL      | 0.925195 | -0.37471 | 3.094566 | 0.005747 | 0.020512 | -2.50741 |
| VDAC1     | 0.535965 | -0.32201 | 3.094    | 0.005754 | 0.020534 | -2.50861 |
| ATP9A     | -1.7909  | 0.776468 | -3.0939  | 0.005756 | 0.020535 | -2.50881 |
| TBC1D2    | -0.72491 | 0.434873 | -3.09365 | 0.005759 | 0.020543 | -2.50935 |
| AEBP2     | -0.72742 | 0.480207 | -3.0933  | 0.005764 | 0.020555 | -2.51008 |
| LOC648740 | 0.675065 | -0.26956 | 3.093019 | 0.005767 | 0.020558 | -2.51069 |
| GINS2     | -1.24643 | 1.194977 | -3.093   | 0.005768 | 0.020558 | -2.51073 |
| LGALS8    | -1.61432 | 1.144724 | -3.093   | 0.005768 | 0.020558 | -2.51073 |
| SOX30     | 0.547361 | -0.39463 | 3.092798 | 0.00577  | 0.020564 | -2.51116 |
| RNPEP     | -0.95157 | 0.776862 | -3.09262 | 0.005772 | 0.020569 | -2.51154 |
| ZNF702P   | -0.82668 | 0.147143 | -3.09207 | 0.00578  | 0.02059  | -2.5127  |
| PRDM2     | -1.03643 | 1.03943  | -3.09148 | 0.005787 | 0.020614 | -2.51396 |
| NEDD4L    | 1.254616 | -0.73458 | 3.090387 | 0.005802 | 0.020661 | -2.51627 |
| AGAP7     | -0.75093 | 0.596017 | -3.09032 | 0.005803 | 0.020661 | -2.51642 |
| SSRP1     | 0.751208 | -0.33729 | 3.090078 | 0.005806 | 0.020664 | -2.51693 |
| ADCY3     | -1.09591 | 0.62185  | -3.08892 | 0.005821 | 0.020711 | -2.51939 |
| MCOLN3    | 0.863216 | -0.49659 | 3.088908 | 0.005821 | 0.020711 | -2.51941 |
| KPNB1     | -0.71307 | 0.670935 | -3.08871 | 0.005824 | 0.020713 | -2.51983 |
| TEX15     | 0.46521  | -0.13734 | 3.088506 | 0.005826 | 0.020719 | -2.52026 |
| NDUFV3    | -0.67906 | 0.612228 | -3.08786 | 0.005835 | 0.020746 | -2.52163 |
| ZNF518A   | -1.05884 | 0.484468 | -3.08769 | 0.005837 | 0.02075  | -2.52199 |
| ARHGAP26  | -0.83136 | 0.557302 | -3.08756 | 0.005839 | 0.02075  | -2.52226 |
| SRC       | 0.751276 | -0.21317 | 3.087527 | 0.005839 | 0.02075  | -2.52234 |
| MKNK2     | -0.5447  | 0.569738 | -3.0867  | 0.00585  | 0.020781 | -2.52409 |
| SCN8A     | -1.33724 | 0.464362 | -3.08649 | 0.005853 | 0.020787 | -2.52453 |
| COL6A3    | -0.45347 | 0.092406 | -3.08641 | 0.005854 | 0.020787 | -2.52471 |
| ASB6      | -0.52636 | 0.599967 | -3.08618 | 0.005857 | 0.020794 | -2.5252  |
| POLR3GL   | -0.7261  | 0.416321 | -3.08519 | 0.00587  | 0.020836 | -2.5273  |
| TLR4      | -1.08992 | 0.77849  | -3.08513 | 0.005871 | 0.020836 | -2.52743 |
| KRTAP12-2 | -0.88084 | 0.073756 | -3.08492 | 0.005874 | 0.020842 | -2.52785 |
| ZNF280D   | -1.19085 | 0.328406 | -3.08449 | 0.005879 | 0.020855 | -2.52877 |
| OR5L2     | 0.570189 | -0.48748 | 3.084141 | 0.005884 | 0.020864 | -2.52951 |
| TMCO5A    | -0.83866 | 0.360785 | -3.08392 | 0.005887 | 0.020869 | -2.52998 |
| IFNGR1    | -1.35357 | 0.248113 | -3.08388 | 0.005888 | 0.020869 | -2.53007 |
| LOC100137 | -1.18043 | 0.992651 | -3.08373 | 0.00589  | 0.020872 | -2.53038 |
| C5AR1     | -1.31871 | 0.906834 | -3.08316 | 0.005897 | 0.020892 | -2.5316  |
| ELF2      | -0.75299 | 0.335172 | -3.08228 | 0.005909 | 0.020922 | -2.53347 |
| PPP1R18   | -0.63439 | 0.593392 | -3.08198 | 0.005913 | 0.02093  | -2.5341  |
| ARL17A    | -0.52098 | 0.173632 | -3.08188 | 0.005914 | 0.02093  | -2.5343  |

|           |          |          |          |          |          |          |
|-----------|----------|----------|----------|----------|----------|----------|
| ORC6      | -1.33537 | 0.884794 | -3.08187 | 0.005914 | 0.02093  | -2.53433 |
| DDIT4     | 0.67379  | -0.55601 | 3.081613 | 0.005918 | 0.020938 | -2.53487 |
| C20orf107 | 0.871514 | -0.69081 | 3.067414 | 0.006679 | 0.022949 | -2.53547 |
| TSC2      | -0.5955  | 0.714517 | -3.08104 | 0.005926 | 0.020958 | -2.53609 |
| SV2B      | 0.54955  | -0.7401  | 3.080843 | 0.005928 | 0.020963 | -2.53651 |
| LOC100506 | 0.704633 | -0.35142 | 3.08048  | 0.005933 | 0.020977 | -2.53727 |
| NACC1     | -0.61518 | 0.625418 | -3.08037 | 0.005934 | 0.020978 | -2.5375  |
| BMPER     | -0.80614 | 0.184104 | -3.08877 | 0.006081 | 0.021389 | -2.53889 |
| ARPC4-TTL | -1.0807  | 0.806698 | -3.07834 | 0.005962 | 0.02107  | -2.5418  |
| NOSTRIN   | 0.613325 | -0.27316 | 3.078042 | 0.005966 | 0.021077 | -2.54244 |
| SPA17     | -1.40529 | 0.780771 | -3.07768 | 0.005971 | 0.021087 | -2.5432  |
| SLC11A2   | -0.63122 | 0.05816  | -3.07742 | 0.005974 | 0.021095 | -2.54376 |
| MIR497HG  | 0.66222  | -0.28225 | 3.077121 | 0.005978 | 0.021106 | -2.54439 |
| PRDX2     | 1.102048 | -0.34966 | 3.076567 | 0.005986 | 0.021128 | -2.54556 |
| VRK3      | -0.5144  | 0.378944 | -3.07636 | 0.005989 | 0.021135 | -2.54601 |
| CLIC1     | -0.74167 | 0.233991 | -3.07605 | 0.005993 | 0.021146 | -2.54666 |
| DEFB104B  | -0.61046 | 0.000622 | -3.07581 | 0.005996 | 0.021153 | -2.54717 |
| HIST1H4F  | -0.63591 | 0.24586  | -3.08398 | 0.006146 | 0.021579 | -2.54888 |
| SKAP1     | 1.298169 | -0.63881 | 3.074386 | 0.006015 | 0.021218 | -2.55018 |
| DHRS2     | 0.551932 | -0.26208 | 3.074154 | 0.006018 | 0.021225 | -2.55067 |
| APLP1     | 0.539191 | -0.45728 | 3.073907 | 0.006022 | 0.021229 | -2.5512  |
| CHMP7     | -0.82087 | 0.771212 | -3.0739  | 0.006022 | 0.021229 | -2.5512  |
| ZNF267    | -1.48788 | 0.179052 | -3.07292 | 0.006035 | 0.021272 | -2.55328 |
| NPFFR2    | 0.809082 | -0.49992 | 3.091323 | 0.006339 | 0.02211  | -2.55386 |
| PCDHB11   | -0.62041 | 0.049643 | -3.07257 | 0.00604  | 0.021286 | -2.55403 |
| WDR37     | -0.57615 | 0.015958 | -3.07242 | 0.006042 | 0.021289 | -2.55435 |
| DHX29     | -0.53164 | 0.148248 | -3.0719  | 0.006049 | 0.02131  | -2.55544 |
| TCF25     | -0.77739 | 0.702594 | -3.07175 | 0.006051 | 0.021313 | -2.55576 |
| OR5I1     | -0.63708 | 0.213821 | -3.07169 | 0.006052 | 0.021313 | -2.55589 |
| KLHL20    | -0.66019 | 0.653905 | -3.07122 | 0.006058 | 0.021331 | -2.55688 |
| E2F8      | -2.50393 | 1.294347 | -3.07095 | 0.006062 | 0.021341 | -2.55746 |
| TAS2R38   | 1.414934 | -0.63824 | 3.100001 | 0.006552 | 0.022614 | -2.55768 |
| PIP       | -0.51134 | -0.02015 | -3.07943 | 0.006209 | 0.021747 | -2.55839 |
| DYNLRB1   | -0.41546 | 0.529081 | -3.07051 | 0.006068 | 0.021357 | -2.55839 |
| SMA5      | -1.45558 | 0.89573  | -3.07043 | 0.006069 | 0.021357 | -2.55855 |
| GLRX2     | -0.63986 | 0.179014 | -3.07037 | 0.00607  | 0.021357 | -2.55869 |
| GYLTL1B   | 1.087973 | -0.3269  | 3.069938 | 0.006076 | 0.021374 | -2.5596  |
| RNF144B   | -1.33801 | 0.314764 | -3.06941 | 0.006083 | 0.02139  | -2.56072 |
| ZNF512    | -0.59584 | 0.319796 | -3.06936 | 0.006084 | 0.02139  | -2.56081 |
| VEPH1     | 1.128931 | -0.32998 | 3.066878 | 0.007032 | 0.023851 | -2.56168 |
| GADD45G   | -1.02276 | 0.610493 | -3.06866 | 0.006094 | 0.02142  | -2.5623  |
| RNF175    | 0.786052 | -0.49731 | 3.068157 | 0.0061   | 0.021441 | -2.56337 |
| STON1-GTI | -0.816   | 0.272148 | -3.07677 | 0.006246 | 0.02184  | -2.56394 |
| INTU      | -1.17149 | 0.254782 | -3.0751  | 0.006269 | 0.02191  | -2.56741 |
| SNAI2     | -0.47611 | 0.037808 | -3.06591 | 0.006131 | 0.021538 | -2.56811 |
| FXR2      | -0.9118  | 1.010345 | -3.06584 | 0.006132 | 0.021538 | -2.56827 |
| DYRK4     | -0.77019 | 0.463697 | -3.06583 | 0.006133 | 0.021538 | -2.56829 |

|           |          |          |          |          |          |          |
|-----------|----------|----------|----------|----------|----------|----------|
| LOC100506 | -0.88985 | 0.139461 | -3.06553 | 0.006137 | 0.021549 | -2.56893 |
| LINC00302 | -0.80397 | 0.134678 | -3.06476 | 0.006147 | 0.021579 | -2.57055 |
| SAMD8     | -0.96743 | 0.223492 | -3.06465 | 0.006149 | 0.02158  | -2.57078 |
| Mar-07    | -1.1776  | 0.410026 | -3.06445 | 0.006152 | 0.021585 | -2.57121 |
| SNTB1     | -0.91431 | 0.637419 | -3.0644  | 0.006152 | 0.021585 | -2.57132 |
| GOLGA8A   | -0.87734 | 0.461217 | -3.06336 | 0.006167 | 0.021631 | -2.57351 |
| ANXA2P3   | 0.356462 | -0.07507 | 3.063052 | 0.006171 | 0.021643 | -2.57417 |
| PRL       | -1.63773 | 1.425343 | -3.0627  | 0.006176 | 0.02165  | -2.57491 |
| RALGPS2   | -0.95471 | 0.637982 | -3.06268 | 0.006176 | 0.02165  | -2.57496 |
| MAL       | 1.615215 | -1.05086 | 3.062655 | 0.006177 | 0.02165  | -2.57501 |
| FHL1      | 1.152411 | -0.28556 | 3.062505 | 0.006179 | 0.02165  | -2.57532 |
| SOCS4     | -1.50876 | 0.483545 | -3.0625  | 0.006179 | 0.02165  | -2.57533 |
| C11orf41  | 1.154562 | -0.74948 | 3.067291 | 0.00789  | 0.02596  | -2.57557 |
| LOC100507 | -0.7941  | 0.522688 | -3.06927 | 0.00635  | 0.022121 | -2.57956 |
| RBM47     | -1.02759 | 0.759004 | -3.06037 | 0.006209 | 0.021747 | -2.57985 |
| DNTTIP1   | -0.7159  | 0.286964 | -3.06013 | 0.006212 | 0.021755 | -2.58034 |
| LFNG      | 1.00252  | -0.50519 | 3.06001  | 0.006214 | 0.021757 | -2.5806  |
| COLEC10   | -0.5347  | 0.226255 | -3.07786 | 0.006528 | 0.022544 | -2.58146 |
| SSBP3     | 0.797241 | 0.041039 | 3.059217 | 0.006225 | 0.021792 | -2.58228 |
| OVOL2     | -0.59045 | 0.045954 | -3.0588  | 0.006231 | 0.021805 | -2.58315 |
| GABBR1    | -0.97219 | 0.523412 | -3.0588  | 0.006231 | 0.021805 | -2.58316 |
| PCDH8     | -1.43328 | 0.262775 | -3.05821 | 0.006239 | 0.02183  | -2.58441 |
| NUP214    | 0.444652 | -0.28949 | 3.058039 | 0.006241 | 0.021834 | -2.58477 |
| PBX2      | -0.66641 | 0.608293 | -3.05789 | 0.006243 | 0.021838 | -2.58507 |
| HSD11B1   | -1.25431 | 0.203377 | -3.07594 | 0.006556 | 0.022623 | -2.58541 |
| XPO7      | 0.593487 | -0.25011 | 3.057678 | 0.006246 | 0.02184  | -2.58553 |
| RDH12     | -0.51341 | 0.178283 | -3.06639 | 0.006391 | 0.022227 | -2.58556 |
| NAGS      | -0.54337 | 0.449264 | -3.05629 | 0.006266 | 0.021905 | -2.58846 |
| NLRP6     | -1.07938 | 1.289833 | -3.056   | 0.00627  | 0.021912 | -2.58908 |
| DEF8      | -0.80337 | 0.696473 | -3.05536 | 0.006279 | 0.021936 | -2.59043 |
| PADI4     | -1.53679 | 1.139408 | -3.05534 | 0.006279 | 0.021936 | -2.59046 |
| GUSB      | -0.63012 | 0.311704 | -3.05479 | 0.006287 | 0.02196  | -2.59164 |
| SSTR2     | -1.13761 | 0.194251 | -3.05471 | 0.006288 | 0.02196  | -2.5918  |
| CHMP5     | -1.6191  | 0.418671 | -3.05392 | 0.0063   | 0.021995 | -2.59347 |
| FAM165B   | -0.81657 | 0.376561 | -3.05384 | 0.006301 | 0.021995 | -2.59365 |
| C17orf105 | -0.36841 | -0.05456 | -3.07172 | 0.006616 | 0.022798 | -2.59405 |
| LOC100657 | 0.741184 | -0.79844 | 3.05354  | 0.006305 | 0.022006 | -2.59427 |
| MON2      | -1.16709 | 0.54381  | -3.0526  | 0.006318 | 0.022049 | -2.59627 |
| MRPL2     | 0.582713 | -0.22682 | 3.051354 | 0.006336 | 0.022103 | -2.59889 |
| TCIRG1    | -0.52488 | 0.306157 | -3.05083 | 0.006344 | 0.02212  | -2.59999 |
| KCNK13    | -0.61104 | 0.319632 | -3.05076 | 0.006345 | 0.02212  | -2.60014 |
| PLEKHB1   | 1.208834 | -0.30681 | 3.050521 | 0.006348 | 0.022121 | -2.60065 |
| C6orf81   | -1.66861 | 0.837651 | -3.05042 | 0.00635  | 0.022121 | -2.60087 |
| COQ5      | -0.88398 | 0.213333 | -3.0504  | 0.00635  | 0.022121 | -2.60091 |
| TRA2A     | -1.08092 | 1.023515 | -3.05039 | 0.00635  | 0.022121 | -2.60093 |
| FCGBP     | 1.556858 | -0.77515 | 3.050162 | 0.006353 | 0.022127 | -2.60141 |
| LOC100508 | 0.685831 | -0.76663 | 3.049931 | 0.006357 | 0.022134 | -2.6019  |

|           |          |          |          |          |          |          |
|-----------|----------|----------|----------|----------|----------|----------|
| RNASEL    | -1.27695 | 0.727479 | -3.04907 | 0.006369 | 0.022173 | -2.60371 |
| SH3PXD2B  | -1.31642 | 0.681835 | -3.04894 | 0.006371 | 0.022176 | -2.60399 |
| ARL13B    | -1.50238 | 0.382278 | -3.0488  | 0.006373 | 0.022179 | -2.60429 |
| LOC100501 | -0.91402 | 0.083177 | -3.04853 | 0.006377 | 0.022189 | -2.60485 |
| E2F5      | -0.92434 | 0.620062 | -3.04835 | 0.006379 | 0.022194 | -2.60524 |
| TMEM5     | -0.5698  | 0.145924 | -3.04818 | 0.006382 | 0.022198 | -2.60559 |
| LARP7     | -1.15227 | 0.690372 | -3.04715 | 0.006396 | 0.022238 | -2.60776 |
| S100A12   | -1.94308 | 0.629804 | -3.04714 | 0.006397 | 0.022238 | -2.60778 |
| LOC439990 | -0.6873  | 0.076447 | -3.04658 | 0.006405 | 0.022263 | -2.60898 |
| LOC100121 | -1.26297 | 0.809774 | -3.04648 | 0.006406 | 0.022264 | -2.60917 |
| PLGLB1    | -0.67333 | 0.474771 | -3.04636 | 0.006408 | 0.022266 | -2.60944 |
| FNDC3B    | -1.30513 | 0.755275 | -3.04624 | 0.00641  | 0.022268 | -2.60968 |
| LINC00176 | 1.01576  | -0.45705 | 3.045866 | 0.006415 | 0.022283 | -2.61048 |
| FAM63A    | -1.06008 | 1.152401 | -3.04567 | 0.006418 | 0.022289 | -2.61089 |
| RBPMS2    | 1.611308 | -0.31059 | 3.045234 | 0.006424 | 0.022307 | -2.61181 |
| NUDCD1    | -0.74803 | 0.149606 | -3.04492 | 0.006429 | 0.022319 | -2.61248 |
| CRH       | -1.06683 | 0.395709 | -3.05329 | 0.006579 | 0.022693 | -2.61282 |
| THAP5     | -1.51901 | 0.375149 | -3.04465 | 0.006433 | 0.022328 | -2.61305 |
| FABP7     | 1.363684 | -0.64869 | 3.058566 | 0.007158 | 0.024156 | -2.61425 |
| SKP2      | -0.69359 | 0.181707 | -3.04374 | 0.006446 | 0.02237  | -2.61496 |
| ZNF365    | 1.01815  | -0.76604 | 3.309061 | 0.013328 | 0.038797 | -2.61574 |
| WDR52     | -1.06995 | 0.36826  | -3.04324 | 0.006453 | 0.022391 | -2.61602 |
| ZNF780B   | -0.86539 | 0.364742 | -3.0428  | 0.00646  | 0.02241  | -2.61696 |
| MT1JP     | 0.748742 | -0.43934 | 3.042579 | 0.006463 | 0.022417 | -2.61742 |
| NFAM1     | -0.91253 | 0.51853  | -3.04243 | 0.006465 | 0.022417 | -2.61773 |
| TNFRSF1B  | -0.69928 | 0.602784 | -3.04241 | 0.006465 | 0.022417 | -2.61777 |
| YIPF6     | -0.71527 | 0.005613 | -3.04221 | 0.006468 | 0.022424 | -2.6182  |
| ZDHHC17   | -1.27116 | 0.492666 | -3.04207 | 0.00647  | 0.022426 | -2.61848 |
| CYP21A2   | 0.456002 | -0.18322 | 3.041926 | 0.006472 | 0.02243  | -2.61879 |
| PRPF6     | 0.552141 | -0.21131 | 3.041708 | 0.006475 | 0.022437 | -2.61925 |
| PAGE5     | 1.345175 | -0.65966 | 3.082279 | 0.008191 | 0.026745 | -2.62019 |
| MT3       | 1.005883 | -0.44189 | 3.040918 | 0.006487 | 0.022473 | -2.62092 |
| FRG2      | -0.46008 | 0.111936 | -3.04071 | 0.00649  | 0.022479 | -2.62135 |
| LOC100121 | -0.58397 | 0.401137 | -3.04038 | 0.006495 | 0.022485 | -2.62206 |
| FAM40A    | -0.44348 | 0.417854 | -3.04036 | 0.006495 | 0.022485 | -2.6221  |
| PSMD14    | -0.72299 | 0.155108 | -3.04022 | 0.006497 | 0.022488 | -2.62239 |
| NOTCH4    | -0.70139 | 0.433553 | -3.04012 | 0.006499 | 0.02249  | -2.62261 |
| LOC100131 | -0.7705  | 0.542688 | -3.03959 | 0.006506 | 0.022512 | -2.62373 |
| MLLT1     | -1.07042 | 0.705889 | -3.03942 | 0.006509 | 0.022517 | -2.62408 |
| GCC2      | -0.67477 | 0.325293 | -3.03926 | 0.006511 | 0.022521 | -2.62442 |
| SLC16A6   | -0.96148 | 0.595119 | -3.03911 | 0.006513 | 0.022524 | -2.62473 |
| TOM1L1    | 0.59739  | -0.18109 | 3.039055 | 0.006514 | 0.022524 | -2.62485 |
| NSFL1C    | -0.83852 | 0.518892 | -3.03873 | 0.006519 | 0.022533 | -2.62554 |
| SNED1     | 0.663687 | -0.20445 | 3.038652 | 0.00652  | 0.022533 | -2.6257  |
| PITPNB    | -0.59171 | 0.199596 | -3.03863 | 0.006521 | 0.022533 | -2.62575 |
| TRO       | 0.80433  | -0.20581 | 3.038458 | 0.006523 | 0.022538 | -2.62611 |
| ENDOG     | 0.76723  | -0.18328 | 3.038239 | 0.006526 | 0.022544 | -2.62657 |

|           |          |          |          |          |          |          |
|-----------|----------|----------|----------|----------|----------|----------|
| SAMD1     | -0.99773 | 1.33935  | -3.0381  | 0.006528 | 0.022544 | -2.62686 |
| OR10J3    | 0.773933 | -0.43816 | 3.03775  | 0.006533 | 0.022558 | -2.6276  |
| PRNT      | -0.86016 | 0.173205 | -3.03662 | 0.00655  | 0.022612 | -2.62999 |
| C4orf36   | -0.71292 | 0.039165 | -3.04488 | 0.006703 | 0.023006 | -2.63031 |
| PCDHGA5   | 1.27826  | -0.72172 | 3.039301 | 0.0071   | 0.02401  | -2.63084 |
| HCN3      | -0.53164 | 0.101793 | -3.05346 | 0.006885 | 0.023501 | -2.63144 |
| CFL1P1    | -0.59089 | 0.325278 | -3.03532 | 0.006569 | 0.022666 | -2.63273 |
| IQCF4     | 0.979921 | -0.40544 | 3.034966 | 0.006575 | 0.02268  | -2.63347 |
| ZNF629    | 0.661133 | -0.32478 | 3.034464 | 0.006582 | 0.022698 | -2.63453 |
| CPEB3     | 0.982665 | -0.14816 | 3.033675 | 0.006594 | 0.022734 | -2.63619 |
| APCDD1    | -1.42622 | 0.677429 | -3.03253 | 0.006611 | 0.022789 | -2.63861 |
| NAT8B     | 1.055486 | -0.17527 | 3.032149 | 0.006616 | 0.022798 | -2.63941 |
| CDKN3     | -1.19408 | 0.394866 | -3.03208 | 0.006617 | 0.022798 | -2.63956 |
| HNF1A     | 0.62747  | -0.54669 | 3.03203  | 0.006618 | 0.022798 | -2.63966 |
| BCL2L11   | -0.60695 | 0.42374  | -3.03189 | 0.00662  | 0.022801 | -2.63995 |
| ZNF174    | -0.71085 | 0.599661 | -3.03179 | 0.006622 | 0.022802 | -2.64016 |
| TXN       | -1.02318 | 0.575096 | -3.03136 | 0.006628 | 0.02282  | -2.64108 |
| FLJ25758  | -0.89153 | 0.2776   | -3.0313  | 0.006629 | 0.02282  | -2.64119 |
| PEBP1     | 0.938314 | -0.48708 | 3.03083  | 0.006636 | 0.02284  | -2.64219 |
| SNX19     | -0.75663 | 0.346438 | -3.03063 | 0.006639 | 0.022846 | -2.64262 |
| TCF4      | -0.52615 | 0.741937 | -3.03023 | 0.006645 | 0.022863 | -2.64345 |
| KLHL23    | -0.63364 | 0.230705 | -3.03015 | 0.006646 | 0.022863 | -2.64363 |
| NOTCH2    | 0.8303   | -0.7481  | 3.029246 | 0.00666  | 0.022903 | -2.64553 |
| SFTA1P    | -0.3897  | 0.118226 | -3.02922 | 0.00666  | 0.022903 | -2.64558 |
| VN1R5     | -0.6457  | 0.165681 | -3.02855 | 0.00667  | 0.022931 | -2.647   |
| MLST8     | -0.5947  | 0.677811 | -3.02852 | 0.006671 | 0.022931 | -2.64707 |
| ZNF311    | 0.901946 | -0.03815 | 3.02811  | 0.006677 | 0.022948 | -2.64792 |
| MAD2L1    | -1.45081 | 0.479309 | -3.03076 | 0.007233 | 0.024359 | -2.64822 |
| CCDC87    | 1.138489 | -0.07239 | 3.027926 | 0.00668  | 0.022949 | -2.64831 |
| ABCA2     | -0.87147 | 0.932105 | -3.02755 | 0.006685 | 0.022965 | -2.6491  |
| P2RX5     | -0.78803 | 0.785071 | -3.02739 | 0.006688 | 0.022969 | -2.64943 |
| SNRPC     | 0.868745 | -0.14016 | 3.027213 | 0.00669  | 0.022974 | -2.64981 |
| PCMT1     | -1.54978 | 0.659867 | -3.02664 | 0.006699 | 0.022999 | -2.65101 |
| DR1       | -1.10394 | 0.72345  | -3.02658 | 0.0067   | 0.022999 | -2.65114 |
| LOC344887 | -1.48981 | 0.828678 | -3.02582 | 0.006711 | 0.02303  | -2.65274 |
| CDC25A    | -1.05071 | 0.745507 | -3.02497 | 0.006724 | 0.02307  | -2.65454 |
| MFSD4     | 0.749266 | -0.44435 | 3.024846 | 0.006726 | 0.023073 | -2.65479 |
| IL6       | 0.584281 | -0.36869 | 3.024104 | 0.006737 | 0.023107 | -2.65636 |
| MEN1      | -0.75661 | 0.825444 | -3.02365 | 0.006744 | 0.023127 | -2.65732 |
| SENP1     | -0.56793 | 0.070077 | -3.02321 | 0.006751 | 0.023145 | -2.65823 |
| IFI35     | -0.99508 | 0.586715 | -3.02288 | 0.006756 | 0.023159 | -2.65893 |
| ABHD12    | -0.74874 | 0.861164 | -3.02264 | 0.00676  | 0.023167 | -2.65944 |
| HPS5      | -0.61095 | 0.351204 | -3.02217 | 0.006767 | 0.023185 | -2.66043 |
| CLDN19    | 0.6689   | -0.41755 | 3.022141 | 0.006767 | 0.023185 | -2.66049 |
| SOS2      | -1.1453  | 0.54508  | -3.02177 | 0.006773 | 0.023199 | -2.66127 |
| HEATR5A   | 1.075792 | -0.30991 | 3.021662 | 0.006774 | 0.023199 | -2.6615  |
| TSPYL4    | -0.4957  | 0.115371 | -3.02164 | 0.006775 | 0.023199 | -2.66154 |

|           |          |          |          |          |          |          |
|-----------|----------|----------|----------|----------|----------|----------|
| C9orf91   | 0.908779 | -0.39571 | 3.021057 | 0.006784 | 0.023225 | -2.66277 |
| FTSJ1     | -0.60693 | 0.650711 | -3.02007 | 0.006799 | 0.023273 | -2.66484 |
| CC2D1A    | -0.88505 | 0.942932 | -3.01968 | 0.006805 | 0.023289 | -2.66566 |
| HIBCH     | -0.41284 | 0.350088 | -3.01961 | 0.006806 | 0.023289 | -2.66582 |
| RCC1      | -0.90727 | 1.013006 | -3.01948 | 0.006808 | 0.023292 | -2.66609 |
| C8orf73   | -1.25392 | 0.62739  | -3.01925 | 0.006811 | 0.023299 | -2.66657 |
| FAM200A   | -1.04608 | 0.383003 | -3.01887 | 0.006817 | 0.023316 | -2.66738 |
| RAB35     | -0.52737 | 0.37666  | -3.01791 | 0.006832 | 0.023362 | -2.66939 |
| UQCC      | -0.6472  | 0.522529 | -3.01777 | 0.006834 | 0.023365 | -2.66969 |
| C6orf105  | 1.163744 | -0.47596 | 3.042254 | 0.007823 | 0.025795 | -2.67031 |
| ACAP1     | -0.85858 | 0.590472 | -3.01701 | 0.006846 | 0.023401 | -2.6713  |
| RSBN1     | -1.09146 | 0.586648 | -3.01628 | 0.006857 | 0.023436 | -2.67283 |
| GDA       | 1.368775 | -0.43864 | 3.037949 | 0.008375 | 0.027217 | -2.67292 |
| PANK3     | -1.10446 | 0.237233 | -3.01616 | 0.006859 | 0.023437 | -2.67307 |
| SH3PXD2A  | -1.17335 | 0.452482 | -3.01593 | 0.006862 | 0.023445 | -2.67355 |
| AP2S1     | 0.564825 | -0.47584 | 3.014986 | 0.006877 | 0.023491 | -2.67554 |
| KAAG1     | 0.645363 | -0.50254 | 3.031746 | 0.007217 | 0.024332 | -2.6758  |
| SSPN      | 0.74979  | -0.34604 | 3.007513 | 0.007281 | 0.024472 | -2.67591 |
| OSBP2     | 1.838657 | -0.30592 | 3.014691 | 0.006881 | 0.023498 | -2.67617 |
| LEAP2     | -0.62168 | 0.351925 | -3.01466 | 0.006882 | 0.023498 | -2.67622 |
| RTN2      | -0.8412  | 0.759998 | -3.01463 | 0.006883 | 0.023498 | -2.6763  |
| ARHGAP5   | -0.9623  | 0.092309 | -3.00718 | 0.007286 | 0.024481 | -2.67659 |
| COL2A1    | -0.9464  | 0.261019 | -3.01421 | 0.006889 | 0.023508 | -2.67717 |
| RAB2A     | -1.13048 | 0.406007 | -3.0142  | 0.006889 | 0.023508 | -2.6772  |
| ZP1       | 1.138646 | -0.45782 | 3.006858 | 0.007292 | 0.02449  | -2.67727 |
| FLJ43663  | -0.58496 | 0.449872 | -3.01381 | 0.006895 | 0.023523 | -2.67802 |
| TTF2      | -0.78005 | 0.463308 | -3.01378 | 0.006896 | 0.023523 | -2.67809 |
| JAKMIP3   | -1.10969 | 0.261216 | -3.01366 | 0.006897 | 0.023524 | -2.67833 |
| PDLIM5    | -0.74333 | 0.520394 | -3.01347 | 0.0069   | 0.02353  | -2.67873 |
| PPEF2     | -1.04159 | 0.364753 | -3.00607 | 0.007304 | 0.02452  | -2.67889 |
| CDK1      | -1.44484 | 0.623729 | -3.01308 | 0.006906 | 0.023545 | -2.67955 |
| PEX5      | -0.69274 | 0.515681 | -3.01304 | 0.006907 | 0.023545 | -2.67963 |
| EIF4A1    | -0.50007 | 0.496451 | -3.01268 | 0.006913 | 0.02356  | -2.68038 |
| PCDHAC1   | 0.94155  | -0.35266 | 3.020691 | 0.007072 | 0.023945 | -2.68052 |
| LOC100510 | 0.998839 | -0.10286 | 3.012425 | 0.006917 | 0.023569 | -2.68093 |
| DUX3      | -0.86951 | 0.217213 | -3.01187 | 0.006925 | 0.023595 | -2.6821  |
| ARHGEF17  | -0.66963 | 0.266471 | -3.01177 | 0.006927 | 0.023596 | -2.6823  |
| C5orf30   | -0.87491 | 0.148146 | -3.01961 | 0.007089 | 0.02399  | -2.68277 |
| HIVEP2    | 0.736308 | -0.42304 | 3.010715 | 0.006943 | 0.023648 | -2.68453 |
| UGT2B17   | 1.788796 | -0.55505 | 2.998581 | 0.009664 | 0.030293 | -2.68466 |
| CSF2RB    | -1.00166 | 0.653089 | -3.01061 | 0.006945 | 0.02365  | -2.68476 |
| NAA16     | -0.38841 | 0.245581 | -3.01033 | 0.006949 | 0.02366  | -2.68534 |
| MAPK3     | -0.77042 | 0.641079 | -3.0102  | 0.006951 | 0.023663 | -2.68562 |
| LOC100286 | -0.51147 | 0.22344  | -3.00958 | 0.006961 | 0.023688 | -2.68691 |
| AGAP10    | 0.60525  | -0.55869 | 3.009436 | 0.006963 | 0.023688 | -2.68722 |
| CREM      | -0.76029 | 0.602125 | -3.00942 | 0.006963 | 0.023688 | -2.68724 |
| WDR5      | -0.54022 | 0.589092 | -3.0093  | 0.006965 | 0.02369  | -2.6875  |

|           |          |          |          |          |          |          |
|-----------|----------|----------|----------|----------|----------|----------|
| POLR2J2   | 0.562555 | -0.94892 | 3.009122 | 0.006968 | 0.023696 | -2.68788 |
| PVALB     | 1.679628 | -0.49557 | 3.008298 | 0.006981 | 0.023736 | -2.68961 |
| MARVELD1  | 1.037602 | -0.37736 | 3.008156 | 0.006983 | 0.023739 | -2.6899  |
| ZNF34     | -0.69963 | 0.641318 | -3.00762 | 0.006992 | 0.023763 | -2.69102 |
| PHACTR4   | -0.57765 | 0.501743 | -3.00755 | 0.006993 | 0.023763 | -2.69118 |
| PTBP3     | -0.87021 | 0.841446 | -3.0072  | 0.006998 | 0.023778 | -2.69191 |
| PDZD7     | 0.55011  | -0.85083 | 3.007096 | 0.007    | 0.023779 | -2.69213 |
| CD6       | 1.417004 | -0.57256 | 3.006081 | 0.007016 | 0.023827 | -2.69427 |
| FAM120B   | -0.97319 | 0.631151 | -3.00599 | 0.007017 | 0.023827 | -2.69445 |
| ACP5      | 0.656587 | -0.20223 | 3.005971 | 0.007018 | 0.023827 | -2.6945  |
| TNFRSF11A | 0.707755 | -0.23658 | 3.005839 | 0.00702  | 0.023827 | -2.69477 |
| MME       | 1.638334 | 0.209538 | 3.00581  | 0.00702  | 0.023827 | -2.69483 |
| LOC646938 | 0.482119 | -0.37751 | 3.005742 | 0.007021 | 0.023827 | -2.69498 |
| NFATC4    | 0.634259 | -0.36514 | 3.005622 | 0.007023 | 0.023829 | -2.69523 |
| RND3      | -0.79373 | 0.327045 | -3.00555 | 0.007024 | 0.023829 | -2.69538 |
| CRISP2    | 1.973794 | -0.57771 | 2.998827 | 0.008129 | 0.026568 | -2.69711 |
| COL1A1    | 0.514008 | -0.16042 | 3.004708 | 0.007038 | 0.023866 | -2.69715 |
| ZBTB40    | 0.49089  | -0.27405 | 3.004624 | 0.007039 | 0.023866 | -2.69733 |
| MLLT11    | 0.836643 | -0.43825 | 3.004431 | 0.007042 | 0.023872 | -2.69773 |
| PITHD1    | 1.195384 | -0.36871 | 3.006076 | 0.007631 | 0.025322 | -2.6984  |
| TAF2      | -0.75431 | 0.265496 | -3.00398 | 0.007049 | 0.023892 | -2.69867 |
| SLC35A2   | -0.39913 | 0.410927 | -3.00383 | 0.007052 | 0.023896 | -2.699   |
| PCDH11X   | -0.83308 | 0.16517  | -3.00366 | 0.007054 | 0.023901 | -2.69935 |
| OLFM4     | -3.39342 | 1.81793  | -2.99609 | 0.007467 | 0.024934 | -2.69948 |
| HAO1      | 0.855289 | -0.49721 | 3.003433 | 0.007058 | 0.023909 | -2.69983 |
| UCP2      | -1.02293 | 1.356268 | -3.0029  | 0.007066 | 0.023934 | -2.70095 |
| PILRA     | -0.94875 | 0.843152 | -3.00269 | 0.00707  | 0.023941 | -2.70138 |
| MAP3K11   | -0.69269 | 0.667671 | -3.00228 | 0.007076 | 0.023955 | -2.70226 |
| CNOT3     | -0.5561  | 0.756058 | -3.0015  | 0.007089 | 0.02399  | -2.70388 |
| PTCHD1    | -0.55097 | 0.119979 | -3.00133 | 0.007091 | 0.023994 | -2.70425 |
| SPSB3     | -0.66076 | 0.53693  | -3.00124 | 0.007093 | 0.023994 | -2.70443 |
| C20orf30  | -0.60599 | 0.084291 | -3.00093 | 0.007098 | 0.024007 | -2.70508 |
| ZNF414    | -0.58143 | 0.533959 | -3.00067 | 0.007102 | 0.024013 | -2.70564 |
| LYVE1     | 1.175535 | -0.35204 | 3.000402 | 0.007106 | 0.024023 | -2.70619 |
| ZNF230    | -1.2595  | 0.958328 | -3.00817 | 0.007271 | 0.024453 | -2.70647 |
| SFXN5     | -0.74279 | 0.431209 | -3.00023 | 0.007109 | 0.024026 | -2.70655 |
| DPP6      | 0.787091 | -0.25819 | 3.000183 | 0.00711  | 0.024026 | -2.70665 |
| CYLC2     | 0.720021 | -0.27131 | 2.991988 | 0.007535 | 0.025101 | -2.70793 |
| RTN4RL2   | 0.472202 | -0.18866 | 2.999189 | 0.007125 | 0.024076 | -2.70874 |
| GYS1      | -0.60578 | 0.42494  | -2.99894 | 0.007129 | 0.024084 | -2.70927 |
| SASH1     | 0.680166 | -0.14687 | 2.998882 | 0.00713  | 0.024084 | -2.70939 |
| CDHR4     | 0.690252 | -0.5838  | 2.991213 | 0.007548 | 0.025123 | -2.70953 |
| ITGAE     | -1.00956 | 0.50811  | -3.00659 | 0.007296 | 0.0245   | -2.70973 |
| CA13      | 0.649781 | -0.16993 | 2.9981   | 0.007143 | 0.024121 | -2.71103 |
| QSOX1     | -1.05237 | 0.422824 | -2.99805 | 0.007144 | 0.024121 | -2.71113 |
| MYH2      | 1.164085 | -0.62842 | 2.990376 | 0.007562 | 0.025153 | -2.71125 |
| CBX5      | -0.81906 | 0.80773  | -2.9979  | 0.007146 | 0.024125 | -2.71145 |



|           |          |          |          |          |          |          |
|-----------|----------|----------|----------|----------|----------|----------|
| ATAD2B    | -0.71233 | -0.01768 | -2.99771 | 0.007149 | 0.024131 | -2.71186 |
| MYOF      | -1.52628 | 0.673479 | -2.99646 | 0.007169 | 0.024191 | -2.71447 |
| LOC10050! | -0.45481 | 0.114247 | -3.01199 | 0.007534 | 0.025101 | -2.71608 |
| BCR       | -0.63828 | 0.57478  | -2.99524 | 0.007189 | 0.024253 | -2.71703 |
| LOC10050! | -0.86973 | 0.028063 | -3.00282 | 0.007357 | 0.02468  | -2.71754 |
| JAZF1     | 0.705747 | -0.17085 | 3.010615 | 0.007556 | 0.025142 | -2.71888 |
| BRSK1     | 0.550727 | -0.33526 | 2.986469 | 0.007628 | 0.02532  | -2.7193  |
| C17orf42  | -1.05172 | -0.02271 | -2.99389 | 0.007211 | 0.024322 | -2.71985 |
| DCLK1     | -0.70985 | 0.080696 | -2.99358 | 0.007216 | 0.024332 | -2.72051 |
| MPHOSPH!  | -0.7508  | 0.424996 | -2.99341 | 0.007218 | 0.024332 | -2.72086 |
| DHRS3     | 1.339569 | -0.52785 | 2.993396 | 0.007219 | 0.024332 | -2.7209  |
| ATP5G3    | -0.90025 | 0.226406 | -2.99289 | 0.007227 | 0.024356 | -2.72196 |
| C18orf32  | 0.810679 | -0.25358 | 2.992671 | 0.00723  | 0.024359 | -2.72242 |
| TMEM30A   | -1.50933 | 0.294071 | -2.99252 | 0.007233 | 0.024359 | -2.72274 |
| SLC35A1   | -1.07937 | 0.13003  | -2.99252 | 0.007233 | 0.024359 | -2.72274 |
| PCNXL2    | 0.572557 | -0.14232 | 2.992137 | 0.007239 | 0.024374 | -2.72354 |
| RBPJ      | -1.2479  | 0.799809 | -2.9921  | 0.00724  | 0.024374 | -2.72361 |
| GBP6      | 0.615254 | -0.97111 | 2.991371 | 0.007252 | 0.02441  | -2.72515 |
| BEND4     | -0.60555 | 0.159104 | -2.99111 | 0.007256 | 0.02442  | -2.72568 |
| ESD       | -0.95817 | 0.6072   | -2.99073 | 0.007262 | 0.024437 | -2.7265  |
| CXorf59   | 0.898306 | -0.41604 | 2.990533 | 0.007265 | 0.024443 | -2.7269  |
| RAN       | -0.65701 | 0.363367 | -2.99026 | 0.00727  | 0.024453 | -2.72748 |
| TMPRSS11  | -0.80864 | 0.087562 | -2.99008 | 0.007273 | 0.024455 | -2.72784 |
| FAM101B   | -0.92269 | 0.855203 | -2.98967 | 0.007279 | 0.024472 | -2.72872 |
| LRR37BP!  | -0.51565 | 0.256582 | -2.98955 | 0.007281 | 0.024472 | -2.72897 |
| UBQLN1    | -1.14224 | 0.181516 | -2.98944 | 0.007283 | 0.024474 | -2.72919 |
| ZCCHC3    | -0.43281 | 0.107157 | -2.98898 | 0.007291 | 0.02449  | -2.73016 |
| NR3C1     | -0.65829 | 0.242381 | -2.98832 | 0.007301 | 0.024514 | -2.73154 |
| KRT6C     | 0.796341 | -0.74723 | 2.984549 | 0.009333 | 0.029544 | -2.7323  |
| 1/2-SBSRN | 0.606664 | -0.48658 | 2.987731 | 0.007311 | 0.024538 | -2.73278 |
| ZZEF1     | -0.54149 | 0.397109 | -2.9872  | 0.00732  | 0.024563 | -2.73389 |
| TUBB4B    | -0.52996 | 0.651141 | -2.98567 | 0.007345 | 0.024644 | -2.73711 |
| MCAT      | -0.44836 | 0.333645 | -2.98485 | 0.007359 | 0.02468  | -2.73881 |
| ZNF83     | -1.21131 | 0.516582 | -2.98583 | 0.007974 | 0.026177 | -2.73946 |
| WT1-AS    | 0.477228 | -0.56487 | 3.029216 | 0.008524 | 0.027576 | -2.73965 |
| LMNB1     | -1.0444  | 0.501648 | -2.98441 | 0.007366 | 0.0247   | -2.73973 |
| RIMBP3    | 0.689821 | 0.008993 | 2.98411  | 0.007371 | 0.024713 | -2.74037 |
| INSL5     | 0.990807 | -0.67707 | 3.018525 | 0.008712 | 0.028047 | -2.74049 |
| SLC22A15  | -0.90328 | 0.354138 | -2.984   | 0.007373 | 0.024715 | -2.74059 |
| SREBF2    | -1.05096 | 0.846538 | -2.9834  | 0.007383 | 0.024744 | -2.74186 |
| TSHZ3     | -1.66636 | 0.730992 | -2.98325 | 0.007385 | 0.024747 | -2.74217 |
| ZNF271    | -0.69523 | 0.511526 | -2.98319 | 0.007386 | 0.024747 | -2.7423  |
| CNKSR2    | 0.784488 | -0.32142 | 2.975671 | 0.008539 | 0.027608 | -2.743   |
| ZNF570    | -0.45475 | 0.228073 | -2.9826  | 0.007396 | 0.02477  | -2.74353 |
| GUCA2A    | 0.566097 | -0.23472 | 2.982539 | 0.007397 | 0.02477  | -2.74366 |
| ASB13     | 0.902456 | -0.56104 | 2.982476 | 0.007398 | 0.02477  | -2.74379 |
| MYL7      | 0.48458  | -0.22134 | 2.982473 | 0.007398 | 0.02477  | -2.7438  |

|           |          |          |          |          |          |          |
|-----------|----------|----------|----------|----------|----------|----------|
| NROB1     | -0.85821 | 0.089605 | -2.98191 | 0.007407 | 0.024797 | -2.74498 |
| BSPRY     | 0.695276 | 0.02953  | 2.981787 | 0.007409 | 0.0248   | -2.74524 |
| CSE1L     | 0.657218 | -0.62504 | 2.981305 | 0.007417 | 0.024822 | -2.74625 |
| LRRC38    | -0.96187 | 0.392974 | -2.98118 | 0.007419 | 0.024825 | -2.74651 |
| RNU12     | 1.056914 | -0.4479  | 2.981047 | 0.007422 | 0.024825 | -2.74679 |
| MLL2      | 0.320189 | -0.24868 | 2.981023 | 0.007422 | 0.024825 | -2.74684 |
| LOC10027: | 0.412283 | -0.19521 | 2.99678  | 0.007787 | 0.025698 | -2.74703 |
| ZNF385D   | 1.056795 | -0.1053  | 2.996279 | 0.007795 | 0.025717 | -2.74805 |
| RAET1E    | -0.80751 | 0.036649 | -2.98008 | 0.007438 | 0.024871 | -2.74881 |
| IFNGR2    | -0.97408 | 0.589577 | -2.98004 | 0.007438 | 0.024871 | -2.74889 |
| LOC10013: | 0.438122 | -0.38252 | 2.979936 | 0.00744  | 0.024872 | -2.74911 |
| C2orf72   | 0.561026 | -0.39174 | 2.979835 | 0.007442 | 0.024872 | -2.74933 |
| RDH8      | 0.478533 | -0.15349 | 2.979807 | 0.007442 | 0.024872 | -2.74939 |
| TNPO2     | -0.55369 | 0.368561 | -2.9796  | 0.007446 | 0.024879 | -2.74981 |
| KCNMB3    | -1.12118 | 0.893215 | -2.97947 | 0.007448 | 0.024882 | -2.75009 |
| LOC44242: | -0.3638  | 0.57015  | -2.97895 | 0.007457 | 0.024907 | -2.75118 |
| TGM2      | 0.754783 | 0.084177 | 2.978549 | 0.007463 | 0.024925 | -2.75202 |
| WTAP      | -0.64332 | 0.30778  | -2.97799 | 0.007473 | 0.024947 | -2.75318 |
| SERPINB6  | -0.64228 | 0.418363 | -2.97792 | 0.007474 | 0.024947 | -2.75333 |
| BCL2L1    | 1.170202 | -0.06149 | 2.977571 | 0.00748  | 0.024963 | -2.75407 |
| USP34     | -0.5967  | 0.289299 | -2.9769  | 0.007491 | 0.024996 | -2.75548 |
| ZNF684    | -1.23774 | 0.74528  | -2.9843  | 0.007664 | 0.025393 | -2.75581 |
| KBTBD2    | -0.96165 | 0.411372 | -2.97647 | 0.007498 | 0.025016 | -2.75638 |
| ANXA1     | -1.34498 | 0.051231 | -2.97607 | 0.007505 | 0.025034 | -2.75721 |
| TUBB3     | 0.458841 | -0.1404  | 2.975684 | 0.007511 | 0.02505  | -2.75802 |
| SPDYA     | -0.92749 | 0.303418 | -2.97564 | 0.007512 | 0.02505  | -2.7581  |
| SLC25A13  | -0.54351 | 0.428331 | -2.97554 | 0.007514 | 0.025051 | -2.75832 |
| TBC1D14   | -0.93032 | 0.535418 | -2.97482 | 0.007526 | 0.025087 | -2.75982 |
| CCDC47    | -1.12238 | 0.800286 | -2.97459 | 0.00753  | 0.025092 | -2.7603  |
| IL17RA    | -0.91322 | 0.614924 | -2.97458 | 0.00753  | 0.025092 | -2.76033 |
| C8orf56   | 0.414781 | -0.30266 | 2.981736 | 0.007708 | 0.025498 | -2.7611  |
| TSEN54    | 0.812983 | -0.18223 | 2.974119 | 0.007538 | 0.025105 | -2.76129 |
| KLB       | 0.770939 | -0.22689 | 2.973928 | 0.007541 | 0.025112 | -2.76169 |
| OR5P2     | -0.67629 | 0.100911 | -2.97385 | 0.007542 | 0.025112 | -2.76187 |
| SLC35F1   | -0.30441 | 0.052212 | -2.97351 | 0.007548 | 0.025123 | -2.76256 |
| LOC10050: | -0.48596 | 0.107799 | -2.97327 | 0.007552 | 0.025132 | -2.76308 |
| CSRP2     | -0.8437  | 0.270285 | -2.98077 | 0.007724 | 0.02553  | -2.76309 |
| KRTAP4-6  | 0.657983 | -0.56183 | 2.972654 | 0.007563 | 0.025153 | -2.76436 |
| DHX36     | -0.69999 | 0.003411 | -2.97259 | 0.007564 | 0.025153 | -2.76449 |
| LILRA4    | -0.7778  | 0.600743 | -2.97213 | 0.007571 | 0.025175 | -2.76546 |
| DDX17     | -0.72298 | 0.548381 | -2.97192 | 0.007575 | 0.025182 | -2.76589 |
| ZNF232    | -0.74715 | 0.505743 | -2.9716  | 0.00758  | 0.025196 | -2.76656 |
| ZNRF1     | -0.76081 | 0.538198 | -2.97146 | 0.007583 | 0.0252   | -2.76687 |
| BSC12     | -0.59504 | 0.373973 | -2.97081 | 0.007594 | 0.025232 | -2.76822 |
| DCAF11    | -0.41367 | 0.327765 | -2.97057 | 0.007598 | 0.02524  | -2.76871 |
| PRKAR2A   | -1.0143  | 0.603179 | -2.97046 | 0.0076   | 0.02524  | -2.76896 |
| RANBP17   | -0.72868 | 0.271007 | -2.97045 | 0.0076   | 0.02524  | -2.76897 |

|           |          |          |          |          |          |          |
|-----------|----------|----------|----------|----------|----------|----------|
| ZCCHC12   | 0.654035 | -0.21975 | 2.961179 | 0.008065 | 0.026399 | -2.7713  |
| MPND      | -0.50754 | 0.400554 | -2.96884 | 0.007627 | 0.02532  | -2.77233 |
| H3F3B     | -0.65211 | 0.42011  | -2.96875 | 0.007629 | 0.02532  | -2.77253 |
| ZNF33B    | 0.725528 | -0.32369 | 2.968722 | 0.007629 | 0.02532  | -2.77259 |
| PALM      | 0.562425 | -0.41467 | 2.96783  | 0.007645 | 0.025363 | -2.77445 |
| DAPP1     | -1.05544 | 0.541421 | -2.96745 | 0.007651 | 0.02538  | -2.77524 |
| FAM19A1   | 0.46159  | -0.09223 | 2.967302 | 0.007654 | 0.025384 | -2.77556 |
| ANAPC7    | -1.0908  | 0.791174 | -2.9672  | 0.007656 | 0.025386 | -2.77578 |
| DMRTB1    | 0.593079 | -0.31634 | 2.967064 | 0.007658 | 0.025389 | -2.77606 |
| BTNL8     | 1.138273 | -0.36707 | 2.974363 | 0.007834 | 0.025812 | -2.77631 |
| CYP51A1   | -0.9016  | 0.606359 | -2.96686 | 0.007661 | 0.025392 | -2.77647 |
| VPREB1    | 0.610916 | -0.44852 | 2.966863 | 0.007661 | 0.025392 | -2.77647 |
| TAAR9     | 0.589154 | -0.15929 | 2.966772 | 0.007663 | 0.025393 | -2.77666 |
| OR2T8     | 1.083617 | -0.37033 | 2.970148 | 0.009088 | 0.028967 | -2.77709 |
| RBM27     | -0.73885 | 0.77841  | -2.96596 | 0.007677 | 0.02543  | -2.77837 |
| CLSTN1    | 0.917929 | -0.31571 | 2.965889 | 0.007678 | 0.02543  | -2.77851 |
| INTS9     | 0.642383 | -0.33477 | 2.965734 | 0.007681 | 0.025435 | -2.77884 |
| TMLHE     | -1.79649 | 1.051216 | -2.96559 | 0.007683 | 0.025438 | -2.77913 |
| C13orf27  | -0.98839 | 0.10097  | -2.97255 | 0.007865 | 0.025888 | -2.78005 |
| TP53BP2   | -0.70091 | 0.281679 | -2.96515 | 0.007691 | 0.025459 | -2.78006 |
| PDHB      | -0.33391 | 0.066489 | -2.96504 | 0.007693 | 0.025461 | -2.78029 |
| LAIR2     | 0.824246 | -0.17138 | 2.964559 | 0.007701 | 0.025481 | -2.78129 |
| RAB18     | -0.97668 | 0.099667 | -2.96455 | 0.007701 | 0.025481 | -2.78132 |
| MTX3      | 0.916216 | -0.25751 | 2.955925 | 0.008159 | 0.026657 | -2.78209 |
| CNN2      | -0.91451 | 0.751957 | -2.96407 | 0.007709 | 0.0255   | -2.78232 |
| NLRP2     | -0.68448 | 0.539299 | -2.96385 | 0.007713 | 0.025508 | -2.78278 |
| TPI1      | -0.38313 | 0.224167 | -2.96356 | 0.007718 | 0.02552  | -2.78339 |
| BBS7      | -1.20747 | 0.50641  | -2.96347 | 0.00772  | 0.025521 | -2.78357 |
| EML4      | -0.78927 | 0.41988  | -2.96282 | 0.007731 | 0.025549 | -2.78493 |
| LOC92249  | 0.366023 | -0.12872 | 2.961487 | 0.007754 | 0.025621 | -2.78771 |
| C21orf81  | 1.493008 | -0.71227 | 2.952806 | 0.008963 | 0.028673 | -2.78822 |
| TBC1D20   | -0.60376 | 0.450341 | -2.9608  | 0.007766 | 0.025656 | -2.78914 |
| NUS1      | -0.81331 | 0.137425 | -2.9605  | 0.007771 | 0.025668 | -2.78979 |
| LOC339316 | 1.00713  | -0.50132 | 2.952142 | 0.008227 | 0.026834 | -2.78985 |
| HIST3H3   | -0.73523 | 0.40891  | -2.96046 | 0.007772 | 0.025668 | -2.78987 |
| FAM116B   | 0.52434  | -0.23235 | 2.960155 | 0.007777 | 0.025681 | -2.7905  |
| ODF3      | 0.596536 | -0.3301  | 2.967369 | 0.007956 | 0.026129 | -2.79073 |
| DNAJC15   | -0.99367 | 0.452539 | -2.95987 | 0.007782 | 0.025692 | -2.79108 |
| EBF4      | 0.498174 | -0.37485 | 2.959773 | 0.007784 | 0.025694 | -2.7913  |
| TIMMDC1   | -0.58946 | 0.126299 | -2.95934 | 0.007792 | 0.02571  | -2.7922  |
| SLC35F3   | 0.503479 | -0.25078 | 2.965636 | 0.007986 | 0.026207 | -2.7943  |
| ZMYM6     | -0.6128  | 0.160304 | -2.9582  | 0.007811 | 0.025767 | -2.79457 |
| ZNF180    | -0.94317 | 0.256527 | -2.96535 | 0.007991 | 0.026214 | -2.7949  |
| RABL2A    | 0.638561 | -0.42783 | 2.95774  | 0.007819 | 0.025789 | -2.79554 |
| SGIP1     | -0.64238 | 0.237187 | -2.95742 | 0.007825 | 0.025799 | -2.79621 |
| PTPN14    | 1.096617 | -0.43541 | 2.957311 | 0.007827 | 0.025801 | -2.79644 |
| LOC389834 | -1.28514 | 0.054346 | -2.95706 | 0.007831 | 0.025811 | -2.79697 |

|           |          |          |          |          |          |          |
|-----------|----------|----------|----------|----------|----------|----------|
| ANKRD52   | 0.980701 | -0.16992 | 2.956904 | 0.007834 | 0.025812 | -2.79729 |
| DBNL      | -0.65962 | 0.537367 | -2.95632 | 0.007844 | 0.025841 | -2.7985  |
| LOC646576 | 0.792883 | -0.34437 | 2.963485 | 0.008024 | 0.026297 | -2.79873 |
| HEXA      | -0.7499  | 0.278494 | -2.95596 | 0.007851 | 0.025856 | -2.79927 |
| CWC27     | -0.9934  | 0.798517 | -2.95592 | 0.007851 | 0.025856 | -2.79935 |
| DTL       | -1.17101 | 0.818543 | -2.95584 | 0.007853 | 0.025856 | -2.79952 |
| FLJ13197  | 1.067328 | -0.43822 | 2.955527 | 0.007858 | 0.02587  | -2.80016 |
| C11orf58  | -0.71672 | 0.107174 | -2.95368 | 0.007891 | 0.02596  | -2.80403 |
| FRYL      | -0.69137 | 0.802088 | -2.95367 | 0.007891 | 0.02596  | -2.80405 |
| CFP       | 0.598434 | -0.30092 | 2.953143 | 0.0079   | 0.025986 | -2.80514 |
| OR8G2     | 0.570214 | -0.36323 | 2.953342 | 0.008555 | 0.027655 | -2.80516 |
| MYH7      | 0.964662 | -0.72524 | 2.955609 | 0.009367 | 0.029645 | -2.80528 |
| RSRC1     | -1.27127 | 0.518661 | -2.95251 | 0.007912 | 0.026016 | -2.80646 |
| STXBP2    | -0.91391 | 0.67201  | -2.95247 | 0.007912 | 0.026016 | -2.80654 |
| NOL4      | -0.6625  | 0.086727 | -2.95229 | 0.007915 | 0.026022 | -2.80691 |
| SPAM1     | 0.783451 | -0.25731 | 2.952378 | 0.008572 | 0.027699 | -2.8071  |
| DCLRE1C   | -1.05101 | 0.766888 | -2.95215 | 0.007918 | 0.026026 | -2.80721 |
| PNPLA8    | 0.652659 | -0.2763  | 2.952064 | 0.007919 | 0.026027 | -2.80739 |
| ANKAR     | -0.78318 | 0.534762 | -2.95183 | 0.007924 | 0.026036 | -2.80788 |
| SHPK      | 0.48741  | -0.27408 | 2.951654 | 0.007927 | 0.026042 | -2.80825 |
| TMCO1     | -1.25207 | 0.023406 | -2.95126 | 0.007934 | 0.026061 | -2.80907 |
| METTL5    | -0.77336 | 0.258235 | -2.94919 | 0.00797  | 0.026173 | -2.81339 |
| C8orf46   | 0.869134 | -0.45904 | 2.948971 | 0.007974 | 0.026177 | -2.81385 |
| DNM2      | -0.5149  | 0.425666 | -2.94873 | 0.007979 | 0.026187 | -2.81435 |
| MORF4L2   | -0.6764  | 0.375328 | -2.94821 | 0.007988 | 0.026209 | -2.81545 |
| FAM120A   | -1.03183 | 0.884162 | -2.94791 | 0.007993 | 0.026214 | -2.81606 |
| MFAP3     | -1.26762 | 0.772188 | -2.94789 | 0.007994 | 0.026214 | -2.8161  |
| LOC100653 | -0.4676  | 0.467064 | -2.94732 | 0.008004 | 0.026243 | -2.81729 |
| DEPDC1B   | -0.68535 | 0.064867 | -2.94676 | 0.008014 | 0.026272 | -2.81846 |
| CHIC1     | 0.826308 | -0.39107 | 2.938132 | 0.008485 | 0.027474 | -2.81856 |
| SCN5A     | -0.76347 | 0.077623 | -2.95339 | 0.008204 | 0.026779 | -2.81951 |
| C1orf115  | 0.619883 | -0.21738 | 2.946182 | 0.008024 | 0.026297 | -2.81967 |
| MTIF2     | -1.13321 | 0.681496 | -2.94568 | 0.008033 | 0.026321 | -2.82071 |
| IGSF6     | -1.1507  | 0.406095 | -2.94562 | 0.008034 | 0.026321 | -2.82083 |
| MAPT      | 0.552336 | -0.29588 | 2.945187 | 0.008042 | 0.026338 | -2.82174 |
| RPRD1B    | 0.606043 | -0.46652 | 2.945184 | 0.008042 | 0.026338 | -2.82175 |
| CABLES2   | -0.54593 | 0.350667 | -2.94432 | 0.008058 | 0.026384 | -2.82355 |
| RPL38     | 1.190304 | -0.77556 | 2.944085 | 0.008062 | 0.026394 | -2.82404 |
| C5orf34   | 0.772077 | -0.24924 | 2.951101 | 0.008246 | 0.026879 | -2.82422 |
| CTNND2    | 0.638175 | -0.64949 | 2.94355  | 0.008072 | 0.026417 | -2.82516 |
| LRRC42    | -0.35147 | 0.147124 | -2.94316 | 0.008079 | 0.026435 | -2.82597 |
| NOL7      | -0.58065 | 0.34122  | -2.94304 | 0.008081 | 0.026437 | -2.82622 |
| CCDC90B   | -1.09463 | 0.632625 | -2.94297 | 0.008082 | 0.026437 | -2.82636 |
| C14orf159 | 0.633922 | -0.15947 | 2.94258  | 0.008089 | 0.026456 | -2.82718 |
| ERCC1     | 0.708444 | -0.2692  | 2.941592 | 0.008107 | 0.02651  | -2.82924 |
| HDLBP     | 0.510067 | -0.05723 | 2.941263 | 0.008113 | 0.026526 | -2.82993 |
| FBLN1     | -0.52609 | 0.158073 | -2.93907 | 0.008153 | 0.026643 | -2.8345  |

|          |          |          |          |          |          |          |
|----------|----------|----------|----------|----------|----------|----------|
| ZNF28    | -1.09871 | 0.326489 | -2.9456  | 0.008346 | 0.027143 | -2.83553 |
| PPT2     | 0.929446 | -0.26143 | 2.938465 | 0.008164 | 0.02667  | -2.83576 |
| FBXO31   | -0.70326 | 0.131292 | -2.93804 | 0.008172 | 0.026691 | -2.83664 |
| PCDH12   | 0.753126 | -0.21074 | 2.917714 | 0.009239 | 0.029321 | -2.83766 |
| C16orf13 | 0.668209 | -0.1752  | 2.937011 | 0.008191 | 0.026745 | -2.83879 |
| OTUB1    | -0.35688 | 0.187996 | -2.93636 | 0.008202 | 0.026778 | -2.84014 |
| KDEL2    | -0.67702 | 0.486102 | -2.93616 | 0.008206 | 0.026779 | -2.84056 |
| FBXO11   | -0.71382 | 0.615446 | -2.93612 | 0.008207 | 0.026779 | -2.84065 |
| SHC1     | -0.48411 | 0.370148 | -2.93593 | 0.00821  | 0.026785 | -2.84103 |
| CCL8     | 0.956726 | -0.21511 | 2.934942 | 0.008228 | 0.026834 | -2.8431  |
| HIF1A    | -0.86085 | 0.276929 | -2.93486 | 0.00823  | 0.026834 | -2.84326 |
| TLL5     | 0.478714 | -0.4598  | 2.934816 | 0.008231 | 0.026834 | -2.84336 |
| UBE4A    | -0.68236 | 0.063339 | -2.93384 | 0.008249 | 0.026884 | -2.84539 |
| PCCB     | -0.43477 | 0.329826 | -2.93351 | 0.008255 | 0.026899 | -2.84607 |
| FLJ33996 | 1.039576 | -0.28145 | 2.933319 | 0.008258 | 0.026906 | -2.84648 |
| KIF20A   | -1.11354 | 0.873111 | -2.93278 | 0.008268 | 0.026935 | -2.84761 |
| C12orf37 | 0.532544 | -0.22528 | 2.939562 | 0.008458 | 0.02742  | -2.84794 |
| TIGD1    | 0.837094 | -0.51212 | 2.932082 | 0.008281 | 0.026972 | -2.84905 |
| PDIA2    | 0.937486 | -0.17439 | 2.909277 | 0.010311 | 0.031862 | -2.84919 |
| GNPNT1   | 0.801156 | -0.55688 | 2.931964 | 0.008283 | 0.026974 | -2.8493  |
| PML      | -0.8831  | 0.844171 | -2.93167 | 0.008289 | 0.026988 | -2.84992 |
| PPL      | 0.673138 | -0.48994 | 2.931126 | 0.008299 | 0.027016 | -2.85104 |
| POMT1    | -0.50418 | 0.31078  | -2.93097 | 0.008302 | 0.027021 | -2.85138 |
| OXTR     | 0.7419   | 0.001324 | 2.930807 | 0.008305 | 0.027026 | -2.85171 |
| C19orf18 | 0.903176 | -0.32858 | 2.921386 | 0.008803 | 0.028293 | -2.85282 |
| TNFRSF19 | 1.234533 | -0.5655  | 2.929199 | 0.008335 | 0.027119 | -2.85505 |
| SF3B14   | -0.93504 | 0.17029  | -2.92895 | 0.008339 | 0.02713  | -2.85557 |
| RAB31    | -1.17599 | 0.739427 | -2.92871 | 0.008344 | 0.02714  | -2.85607 |
| NOA1     | 0.475171 | -0.31173 | 2.928104 | 0.008355 | 0.027167 | -2.85733 |
| UBXN4    | -1.33258 | 0.612517 | -2.92727 | 0.008371 | 0.027213 | -2.85906 |
| JAG2     | -0.6361  | 0.445025 | -2.92709 | 0.008374 | 0.027217 | -2.85944 |
| SC5DL    | -1.23359 | 0.377072 | -2.92697 | 0.008376 | 0.027218 | -2.8597  |
| SCPEP1   | -1.07044 | 0.127652 | -2.92609 | 0.008393 | 0.027267 | -2.86152 |
| UBTD2    | -0.69963 | 0.505062 | -2.92595 | 0.008396 | 0.027272 | -2.86182 |
| SMARCA1  | -0.56151 | 0.531904 | -2.92564 | 0.008401 | 0.027285 | -2.86245 |
| CDH13    | -1.08716 | 0.461264 | -2.9255  | 0.008404 | 0.02729  | -2.86276 |
| FLJ21369 | -0.75761 | 0.362685 | -2.92503 | 0.008413 | 0.027311 | -2.86373 |
| TNKS1BP1 | 0.707897 | -0.17915 | 2.924997 | 0.008413 | 0.027311 | -2.8638  |
| ZNF812   | -0.82274 | 0.441448 | -2.92455 | 0.008422 | 0.027334 | -2.86473 |
| CDK5R2   | 0.634658 | -0.45796 | 2.924235 | 0.008428 | 0.027349 | -2.86538 |
| AIPL1    | -0.6449  | -0.03045 | -2.92384 | 0.008435 | 0.027368 | -2.8662  |
| NKIRAS1  | -1.51735 | 0.585526 | -2.92341 | 0.008443 | 0.02739  | -2.8671  |
| GGA1     | -1.59755 | 0.800199 | -2.92332 | 0.008445 | 0.027391 | -2.86729 |
| CXCL17   | -0.50091 | -0.01084 | -2.92303 | 0.00845  | 0.027404 | -2.8679  |
| MBOAT1   | -0.9558  | 0.289777 | -2.92293 | 0.008452 | 0.027406 | -2.86809 |
| CTGF     | 1.860112 | -1.14162 | 2.927022 | 0.011129 | 0.033809 | -2.86852 |
| METTL19  | 0.405748 | 0.01283  | 2.921793 | 0.008474 | 0.027461 | -2.87046 |

|           |          |          |          |          |          |          |
|-----------|----------|----------|----------|----------|----------|----------|
| CASP2     | -1.55594 | 1.707627 | -2.92176 | 0.008474 | 0.027461 | -2.87052 |
| CEP63     | -0.65637 | 0.65601  | -2.92172 | 0.008475 | 0.027461 | -2.8706  |
| GCFC1-AS1 | -1.16952 | 0.251044 | -2.92157 | 0.008478 | 0.027466 | -2.87092 |
| GIT1      | -0.69454 | 1.020277 | -2.92139 | 0.008481 | 0.027473 | -2.8713  |
| KRT83     | -0.62492 | 0.130291 | -2.9213  | 0.008483 | 0.027474 | -2.87149 |
| ABCA12    | -0.83567 | -0.09149 | -2.91224 | 0.008981 | 0.028703 | -2.8715  |
| C17orf66  | 0.61582  | -0.10838 | 2.927849 | 0.008679 | 0.027959 | -2.87198 |
| FLNB      | -1.15161 | 0.741384 | -2.92053 | 0.008498 | 0.027512 | -2.87309 |
| SOAT2     | 0.754325 | -0.46947 | 2.920258 | 0.008503 | 0.027524 | -2.87365 |
| C12orf57  | 1.191752 | -0.84225 | 2.920083 | 0.008506 | 0.027526 | -2.87401 |
| RILPL2    | -0.6702  | 0.309182 | -2.92008 | 0.008506 | 0.027526 | -2.87402 |
| C9orf116  | 0.545046 | -0.29228 | 2.919755 | 0.008512 | 0.027541 | -2.8747  |
| RRAGB     | -0.74361 | 0.098386 | -2.91009 | 0.009024 | 0.028815 | -2.87588 |
| ECHDC1    | -0.6648  | 0.274341 | -2.91878 | 0.008531 | 0.027592 | -2.87673 |
| LRRC43    | 0.861802 | -0.08725 | 2.918584 | 0.008535 | 0.0276   | -2.87713 |
| ZNF766    | -1.37086 | 0.458102 | -2.90931 | 0.009039 | 0.028843 | -2.87748 |
| ALG10     | -0.61193 | 0.118986 | -2.91729 | 0.009247 | 0.029332 | -2.87779 |
| CHST5     | 0.688094 | -0.4554  | 2.917387 | 0.008557 | 0.02766  | -2.87962 |
| TMEM238   | 0.891385 | -0.37817 | 2.916986 | 0.008565 | 0.02768  | -2.88045 |
| GPR27     | -1.28996 | 0.746363 | -2.916   | 0.008584 | 0.027732 | -2.8825  |
| C16orf78  | 0.407406 | -0.45969 | 2.91581  | 0.008588 | 0.027739 | -2.8829  |
| ATP8B4    | -1.69761 | 1.019055 | -2.92184 | 0.008794 | 0.028272 | -2.88429 |
| KRTAP19-1 | 0.611601 | -0.33189 | 2.914856 | 0.008606 | 0.027794 | -2.88488 |
| BSDC1     | -0.5431  | 0.293144 | -2.91446 | 0.008614 | 0.027814 | -2.88571 |
| FBXO30    | -0.96505 | -0.13826 | -2.91396 | 0.008623 | 0.02784  | -2.88675 |
| LOC100506 | 0.463602 | -0.38722 | 2.913748 | 0.008627 | 0.027849 | -2.88718 |
| C12orf69  | 1.378948 | -0.73614 | 2.921354 | 0.009581 | 0.030147 | -2.88734 |
| C19orf55  | -0.60538 | 0.387095 | -2.91345 | 0.008633 | 0.027863 | -2.8878  |
| TINAGL1   | 0.579871 | -0.40786 | 2.913063 | 0.00864  | 0.027878 | -2.8886  |
| PRAC      | 0.491404 | -0.73148 | 2.913    | 0.008642 | 0.027878 | -2.88873 |
| PSMA2     | -1.06633 | -0.00958 | -2.91292 | 0.008643 | 0.027878 | -2.88889 |
| OTUD3     | -0.54617 | 0.109234 | -2.9129  | 0.008643 | 0.027878 | -2.88894 |
| SAA4      | 0.662807 | -0.31308 | 2.912708 | 0.008647 | 0.027886 | -2.88934 |
| LOC100507 | -0.98201 | 0.006209 | -2.91262 | 0.008649 | 0.027886 | -2.88951 |
| HRASLS    | 1.295416 | -0.58361 | 2.932135 | 0.011776 | 0.035259 | -2.88956 |
| Sep-06    | -0.73128 | 0.9049   | -2.91176 | 0.008665 | 0.027935 | -2.8913  |
| IFI30     | -0.72412 | 0.359193 | -2.91157 | 0.008669 | 0.02794  | -2.89171 |
| AURKA     | -0.70213 | 0.446236 | -2.91153 | 0.00867  | 0.02794  | -2.89178 |
| CCT8L2    | -0.75278 | 0.042144 | -2.9113  | 0.008674 | 0.02795  | -2.89226 |
| ARHGDIG   | 0.404457 | -0.17476 | 2.910561 | 0.008689 | 0.027986 | -2.8938  |
| EIF2B1    | -0.45126 | 0.323498 | -2.91044 | 0.008691 | 0.027986 | -2.89406 |
| C9orf80   | -0.79212 | 0.152294 | -2.91043 | 0.008691 | 0.027986 | -2.89407 |
| ZNF26     | -0.81144 | 0.386962 | -2.90862 | 0.008726 | 0.02809  | -2.89784 |
| NAPB      | -1.00042 | 0.312912 | -2.90855 | 0.008728 | 0.02809  | -2.89798 |
| TFF2      | 0.637476 | -0.44415 | 2.907472 | 0.008749 | 0.028153 | -2.90021 |
| EIF3A     | 0.535722 | -0.20734 | 2.907037 | 0.008757 | 0.028176 | -2.90111 |
| TMEM192   | -0.67498 | 0.334812 | -2.91351 | 0.008956 | 0.028668 | -2.90136 |

|           |          |          |          |          |          |          |
|-----------|----------|----------|----------|----------|----------|----------|
| LARP6     | -1.2792  | 0.386997 | -2.91318 | 0.008963 | 0.028673 | -2.90204 |
| NUFIP1    | 0.695697 | -0.55201 | 2.91293  | 0.008968 | 0.02868  | -2.90255 |
| ITGA3     | 0.792035 | 0.052892 | 2.896787 | 0.009291 | 0.029428 | -2.90301 |
| ZNF578    | -0.80736 | 0.091419 | -2.90609 | 0.008776 | 0.02823  | -2.90307 |
| DEXI      | 0.804134 | -0.23146 | 2.905751 | 0.008782 | 0.028247 | -2.90378 |
| ADAMTS16  | 0.887603 | -0.22155 | 2.905523 | 0.008787 | 0.028257 | -2.90425 |
| ZNF843    | 0.60238  | -0.48342 | 2.905138 | 0.008794 | 0.028272 | -2.90505 |
| C10orf47  | 0.642998 | 0.182254 | 2.904654 | 0.008804 | 0.028293 | -2.90606 |
| PLCZ1     | 1.748042 | -0.62977 | 2.963404 | 0.013056 | 0.038194 | -2.90608 |
| ROCK1     | -1.49956 | 0.947462 | -2.90425 | 0.008812 | 0.028314 | -2.90689 |
| ZNF2      | -1.19056 | 0.450809 | -2.9036  | 0.008825 | 0.02835  | -2.90825 |
| NGDN      | -0.7784  | 0.604929 | -2.90348 | 0.008827 | 0.028353 | -2.9085  |
| PSD       | 0.742658 | -0.47042 | 2.90338  | 0.008829 | 0.028355 | -2.9087  |
| CD160     | 1.117736 | -0.06882 | 2.902418 | 0.008848 | 0.028411 | -2.91069 |
| TRDMT1    | -0.74539 | 0.161784 | -2.90174 | 0.008861 | 0.02845  | -2.91211 |
| TRPC6     | 0.846284 | -0.35116 | 2.900038 | 0.009598 | 0.030176 | -2.91245 |
| LOC439911 | -0.66876 | 0.254408 | -2.9015  | 0.008866 | 0.028456 | -2.91259 |
| CLK4      | -1.16843 | 0.484893 | -2.90796 | 0.009066 | 0.028912 | -2.91272 |
| SUMF1     | -0.75901 | 0.102913 | -2.90112 | 0.008873 | 0.028474 | -2.91338 |
| DDIT4L    | 1.015648 | -0.63857 | 2.879348 | 0.010035 | 0.031204 | -2.91433 |
| NBL1      | 0.368111 | -0.3101  | 2.900582 | 0.008884 | 0.028504 | -2.9145  |
| LRRC34    | -0.45161 | 0.049271 | -2.90024 | 0.008891 | 0.028521 | -2.91522 |
| NARF      | -0.66952 | 0.327804 | -2.89999 | 0.008896 | 0.028529 | -2.91573 |
| FLRT1     | 0.921891 | -0.49006 | 2.898392 | 0.009632 | 0.03024  | -2.91575 |
| PBOV1     | 0.535014 | -0.40323 | 2.899971 | 0.008896 | 0.028529 | -2.91577 |
| BTBD6     | 0.466414 | -0.23321 | 2.899388 | 0.008908 | 0.028561 | -2.91698 |
| MAGEB4    | 1.288246 | -0.43375 | 2.876942 | 0.010087 | 0.031317 | -2.91913 |
| NDUFA10   | -0.53444 | 0.304665 | -2.89791 | 0.008937 | 0.028646 | -2.92004 |
| MTHFSD    | -0.87046 | 0.265687 | -2.89784 | 0.008939 | 0.028646 | -2.92019 |
| ENTPD2    | 0.595071 | -0.42468 | 2.89782  | 0.008939 | 0.028646 | -2.92023 |
| ACIN1     | -0.62684 | 0.494821 | -2.89776 | 0.00894  | 0.028646 | -2.92035 |
| URB1      | 0.798644 | -0.48473 | 2.897457 | 0.008946 | 0.028658 | -2.92098 |
| ABCC2     | -0.87813 | 0.86034  | -2.89743 | 0.008947 | 0.028658 | -2.92103 |
| LY6G6F    | 0.827522 | -0.30731 | 2.8972   | 0.008951 | 0.028665 | -2.92151 |
| TUFT1     | 0.761061 | -0.37363 | 2.897174 | 0.008952 | 0.028665 | -2.92157 |
| NEK2      | -1.66879 | 0.976297 | -2.89694 | 0.008956 | 0.028668 | -2.92206 |
| ETS2      | -1.49993 | 0.737391 | -2.89691 | 0.008957 | 0.028668 | -2.92212 |
| TPM3      | -1.60756 | 1.073853 | -2.89667 | 0.008962 | 0.028673 | -2.92261 |
| NBEAL2    | -0.91631 | 0.567367 | -2.89636 | 0.008968 | 0.02868  | -2.92326 |
| INPP5F    | -0.6828  | 0.662234 | -2.89626 | 0.00897  | 0.028681 | -2.92345 |
| ATP13A2   | -0.64516 | 0.764062 | -2.89591 | 0.008977 | 0.028699 | -2.92418 |
| DICER1-AS | -0.76054 | 0.553099 | -2.89572 | 0.008981 | 0.028703 | -2.92458 |
| GNB4      | -1.21647 | 0.544401 | -2.89563 | 0.008983 | 0.028703 | -2.92477 |
| UBQLN2    | -1.19232 | 0.657655 | -2.89523 | 0.008991 | 0.028723 | -2.92559 |
| IL15RA    | -0.99334 | 0.550626 | -2.89407 | 0.009014 | 0.028794 | -2.92801 |
| ADAMTSL3  | -0.4403  | 0.163239 | -2.89379 | 0.00902  | 0.028807 | -2.92859 |
| RPL19     | 1.126626 | -0.75812 | 2.893349 | 0.009028 | 0.028825 | -2.92949 |

|           |          |          |          |          |          |          |
|-----------|----------|----------|----------|----------|----------|----------|
| ZNF37A    | -0.73005 | 0.700877 | -2.89329 | 0.00903  | 0.028825 | -2.92962 |
| SPARC     | 1.341894 | -0.33417 | 2.892846 | 0.009038 | 0.028843 | -2.93054 |
| ATP5G2    | 0.716093 | -0.41516 | 2.892782 | 0.00904  | 0.028843 | -2.93067 |
| LINC00470 | -0.81108 | 0.225379 | -2.89251 | 0.009045 | 0.028856 | -2.93124 |
| TES       | -0.65115 | 0.506141 | -2.8924  | 0.009047 | 0.028858 | -2.93145 |
| CSNK2B    | -0.40827 | 0.525005 | -2.89077 | 0.00908  | 0.02895  | -2.93483 |
| KRTAP13-3 | -0.74052 | 0.350714 | -2.89713 | 0.009284 | 0.02942  | -2.93486 |
| CASC2     | -0.72903 | 0.045691 | -2.89076 | 0.009081 | 0.02895  | -2.93486 |
| C20orf7   | -1.12988 | 0.346945 | -2.89034 | 0.009089 | 0.028967 | -2.93572 |
| OXSRI     | -0.86156 | 0.846177 | -2.89027 | 0.00909  | 0.028967 | -2.93586 |
| LOC100287 | -0.8516  | 0.616859 | -2.89018 | 0.009092 | 0.028968 | -2.93605 |
| CORO1C    | -0.85003 | 0.803255 | -2.8899  | 0.009098 | 0.028981 | -2.93663 |
| APBB1IP   | -1.18666 | 0.999735 | -2.88981 | 0.0091   | 0.028982 | -2.93681 |
| LOC100126 | -1.06286 | 0.369591 | -2.88939 | 0.009108 | 0.029005 | -2.9377  |
| ALAS1     | -1.03979 | 0.894839 | -2.88908 | 0.009115 | 0.02902  | -2.93834 |
| THUMPD3   | -0.54777 | 0.222913 | -2.88887 | 0.009119 | 0.029029 | -2.93877 |
| EXOSC8    | -0.7773  | 0.473064 | -2.88869 | 0.009122 | 0.029036 | -2.93914 |
| LOC100506 | 0.389299 | -0.2552  | 2.888379 | 0.009129 | 0.029051 | -2.93979 |
| ZNF300    | -0.75663 | 0.039738 | -2.88635 | 0.009885 | 0.030853 | -2.9399  |
| NDFIP1    | -0.69887 | 0.258972 | -2.88829 | 0.009131 | 0.029053 | -2.93998 |
| PROK2     | -1.43701 | 1.074829 | -2.88821 | 0.009132 | 0.029053 | -2.94013 |
| RABIF     | -1.08476 | 0.558858 | -2.88769 | 0.009143 | 0.029082 | -2.94121 |
| ZNF697    | 0.488177 | -0.21525 | 2.887525 | 0.009146 | 0.029088 | -2.94155 |
| EMX2OS    | -0.84103 | 0.11881  | -2.88729 | 0.009151 | 0.029098 | -2.94203 |
| CSNK1A1P  | -0.64701 | 0.207928 | -2.88706 | 0.009156 | 0.029108 | -2.94252 |
| LINC00256 | -1.2434  | 0.835078 | -2.88679 | 0.009161 | 0.029121 | -2.94308 |
| ALOX15B   | 0.829536 | -0.47829 | 2.886467 | 0.009168 | 0.02913  | -2.94374 |
| MRPS36    | -0.55499 | 0.079257 | -2.88646 | 0.009168 | 0.02913  | -2.94376 |
| PPP1R13L  | 0.544939 | -0.24736 | 2.886436 | 0.009168 | 0.02913  | -2.94381 |
| C1QTNF9   | -0.73433 | 0.225036 | -2.8858  | 0.009181 | 0.029167 | -2.94512 |
| CHPF2     | -0.62514 | 0.491835 | -2.88487 | 0.0092   | 0.029222 | -2.94704 |
| CENPL     | -1.75986 | 0.929789 | -2.88432 | 0.009212 | 0.029254 | -2.94819 |
| SH2D6     | 1.925347 | -0.72718 | 2.883636 | 0.009226 | 0.029293 | -2.9496  |
| GFRA2     | 0.406466 | -0.13142 | 2.883522 | 0.009228 | 0.029296 | -2.94984 |
| STK40     | 0.533347 | -0.19337 | 2.883316 | 0.009232 | 0.029304 | -2.95026 |
| VAMP7     | -0.7634  | -0.17115 | -2.8828  | 0.009243 | 0.029324 | -2.95133 |
| ERF       | -0.59373 | 0.734897 | -2.8828  | 0.009243 | 0.029324 | -2.95133 |
| DDX46     | -0.47889 | 0.307496 | -2.88252 | 0.009249 | 0.029332 | -2.95191 |
| LOC100509 | -0.97655 | 0.227882 | -2.88245 | 0.00925  | 0.029332 | -2.95205 |
| GMFG      | -0.86211 | 0.338974 | -2.88171 | 0.009265 | 0.029376 | -2.95359 |
| SRSF5     | -0.53474 | 0.150091 | -2.88151 | 0.009269 | 0.029384 | -2.954   |
| FAM171B   | -0.3908  | 0.082451 | -2.88124 | 0.009275 | 0.029397 | -2.95456 |
| VMA21     | -0.6391  | 0.279897 | -2.88071 | 0.009286 | 0.029422 | -2.95566 |
| LOC100509 | 0.618819 | -0.57854 | 2.880497 | 0.00929  | 0.029428 | -2.95609 |
| C19orf80  | 0.634745 | -0.23964 | 2.886698 | 0.009498 | 0.02995  | -2.95617 |
| CCDC84    | -0.40767 | 0.251234 | -2.88    | 0.009301 | 0.029454 | -2.95712 |
| NEK8      | -0.90912 | 1.028209 | -2.87919 | 0.009317 | 0.029503 | -2.9588  |



|           |           |          |          |          |          |          |
|-----------|-----------|----------|----------|----------|----------|----------|
| LINC00471 | 1.09348   | -0.52724 | 2.851708 | 0.011614 | 0.034865 | -2.95932 |
| TMEM185   | -0.71247  | 0.593459 | -2.87842 | 0.009333 | 0.029544 | -2.9604  |
| ACSS3     | -0.80755  | 0.037986 | -2.88399 | 0.009555 | 0.030085 | -2.96169 |
| SYT8      | 1.03356   | -0.77843 | 2.908158 | 0.013263 | 0.038683 | -2.96416 |
| CELSR3    | 0.584141  | -0.19261 | 2.876431 | 0.009375 | 0.029665 | -2.9645  |
| PNISR     | -0.74029  | 0.555997 | -2.87617 | 0.00938  | 0.029677 | -2.96503 |
| PPY2      | 0.491695  | -0.39575 | 2.876111 | 0.009381 | 0.029677 | -2.96516 |
| WIPI2     | 0.377941  | -0.05311 | 2.875772 | 0.009388 | 0.029694 | -2.96586 |
| SNRNP70   | -0.64767  | 0.588864 | -2.87564 | 0.009391 | 0.029698 | -2.96614 |
| NKX3-1    | 0.893346  | -0.8173  | 2.875547 | 0.009393 | 0.0297   | -2.96633 |
| FLJ36116  | 0.606452  | -0.35815 | 2.875382 | 0.009397 | 0.029706 | -2.96667 |
| ADAMTS9   | -0.581649 | -0.20286 | 2.865407 | 0.009951 | 0.030985 | -2.96682 |
| COX15     | -0.98112  | 0.586702 | -2.87456 | 0.009414 | 0.029753 | -2.96837 |
| FGD3      | -0.86079  | 0.91297  | -2.87445 | 0.009416 | 0.029753 | -2.96859 |
| LOC38963  | -1.31905  | 0.985863 | -2.87445 | 0.009416 | 0.029753 | -2.9686  |
| C22orf31  | 0.971327  | -0.26005 | 2.864221 | 0.009977 | 0.031046 | -2.96923 |
| USPL1     | -0.61321  | 0.393588 | -2.87405 | 0.009424 | 0.029774 | -2.96941 |
| STK32B    | -0.8464   | 0.344452 | -2.87982 | 0.009643 | 0.030256 | -2.9702  |
| WDR72     | -0.48801  | 0.083479 | -2.87334 | 0.009439 | 0.029817 | -2.97089 |
| POU1F1    | 0.79246   | -0.14039 | 2.873183 | 0.009443 | 0.02982  | -2.97121 |
| PLEKHH2   | -0.85704  | 0.110136 | -2.87315 | 0.009443 | 0.02982  | -2.97128 |
| DCP1A     | -0.44555  | 0.063265 | -2.87287 | 0.009449 | 0.029834 | -2.97186 |
| YIPF5     | -0.89406  | 0.315219 | -2.87126 | 0.009483 | 0.029935 | -2.97518 |
| LOC10050  | -1.00706  | 0.154178 | -2.87114 | 0.009486 | 0.029937 | -2.97544 |
| LOC10050  | 1.132138  | -0.1621  | 2.871096 | 0.009486 | 0.029937 | -2.97552 |
| ALDH5A1   | 0.631733  | -0.25545 | 2.870851 | 0.009492 | 0.029948 | -2.97603 |
| SLC37A2   | 0.967909  | -0.51283 | 2.870642 | 0.009496 | 0.02995  | -2.97646 |
| C8orf39   | 0.395731  | -0.26592 | 2.870569 | 0.009498 | 0.02995  | -2.97661 |
| LOC10065  | 0.742095  | -0.29967 | 2.870547 | 0.009498 | 0.02995  | -2.97665 |
| FAM178A   | -0.94217  | 0.525163 | -2.87026 | 0.009504 | 0.029963 | -2.97724 |
| ACP1      | 0.699112  | -0.61207 | 2.869939 | 0.009511 | 0.02998  | -2.97791 |
| HIST1H2A  | -1.04554  | 0.867293 | -2.86976 | 0.009515 | 0.029987 | -2.97829 |
| LOC10050  | 0.688987  | -0.364   | 2.869619 | 0.009518 | 0.029992 | -2.97857 |
| SLC38A1   | 1.071839  | -0.80538 | 2.868835 | 0.009534 | 0.030039 | -2.98019 |
| TACC1     | 0.583698  | -0.13905 | 2.868678 | 0.009538 | 0.030045 | -2.98051 |
| SDCBP     | -1.56865  | 1.179729 | -2.86808 | 0.00955  | 0.03008  | -2.98175 |
| PGLYRP2   | 0.557132  | -0.35584 | 2.858004 | 0.010114 | 0.031359 | -2.98184 |
| RUNX2     | 0.425103  | -0.26762 | 2.86796  | 0.009553 | 0.030083 | -2.982   |
| UNC5B     | 0.794197  | -0.27137 | 2.867646 | 0.009559 | 0.030094 | -2.98264 |
| BET3L     | 0.986356  | -0.11215 | 2.873594 | 0.009775 | 0.030567 | -2.98289 |
| ZNF598    | -0.47042  | 0.492707 | -2.86704 | 0.009572 | 0.03013  | -2.9839  |
| PALM3     | 1.016849  | -0.68901 | 2.872298 | 0.010627 | 0.032658 | -2.98407 |
| T         | 0.582263  | -0.41117 | 2.866866 | 0.009576 | 0.030137 | -2.98425 |
| BHLHE22   | -0.60965  | 0.12193  | -2.86652 | 0.009583 | 0.03015  | -2.98496 |
| GAS2L2    | 0.535506  | -0.35219 | 2.8661   | 0.009592 | 0.030173 | -2.98583 |
| FBXL5     | -1.26329  | 0.940784 | -2.86604 | 0.009594 | 0.030173 | -2.98595 |
| GCGR      | 0.506488  | -0.39004 | 2.865886 | 0.009597 | 0.030176 | -2.98628 |

|           |          |          |          |          |          |          |
|-----------|----------|----------|----------|----------|----------|----------|
| STARD10   | 0.951593 | 0.339463 | 2.865586 | 0.009603 | 0.030189 | -2.9869  |
| C2orf53   | 0.478649 | -0.27477 | 2.865476 | 0.009606 | 0.030191 | -2.98712 |
| AQP9      | -1.17546 | 0.674221 | -2.86536 | 0.009608 | 0.030194 | -2.98736 |
| PSG8      | -0.74809 | 0.136684 | -2.86525 | 0.00961  | 0.030197 | -2.98759 |
| YY1AP1    | 0.491812 | -0.17531 | 2.865107 | 0.009614 | 0.030202 | -2.98788 |
| MTAP      | 0.74727  | -0.46797 | 2.864832 | 0.009619 | 0.030215 | -2.98845 |
| ANKRD60   | -0.95475 | 0.222784 | -2.86426 | 0.009632 | 0.03024  | -2.98963 |
| ECI2      | 0.717257 | -0.25797 | 2.864259 | 0.009632 | 0.03024  | -2.98963 |
| MOB3B     | -0.85729 | 0.825803 | -2.86386 | 0.00964  | 0.030256 | -2.99047 |
| CHRNA2    | 0.465596 | -0.1885  | 2.86384  | 0.009641 | 0.030256 | -2.9905  |
| PTGES3    | -0.87945 | 0.841256 | -2.86372 | 0.009643 | 0.030256 | -2.99075 |
| C19orf53  | 0.551123 | -0.42427 | 2.863628 | 0.009645 | 0.030257 | -2.99094 |
| C1orf228  | -0.67863 | 0.245127 | -2.86353 | 0.009647 | 0.030258 | -2.99113 |
| LOC72968  | -0.68939 | 0.421579 | -2.86348 | 0.009648 | 0.030258 | -2.99125 |
| TGFBR2    | -0.92392 | 0.469961 | -2.8633  | 0.009652 | 0.030265 | -2.99162 |
| C1orf43   | -0.63082 | 0.265104 | -2.86312 | 0.009656 | 0.030272 | -2.99199 |
| POTED     | -0.97481 | 0.196379 | -2.86854 | 0.009883 | 0.030853 | -2.99317 |
| PIK3CD    | -0.96189 | 1.061188 | -2.86234 | 0.009673 | 0.030315 | -2.99359 |
| CDH24     | -0.96255 | 0.363113 | -2.8622  | 0.009676 | 0.030319 | -2.99387 |
| DSCC1     | -1.15935 | 0.589705 | -2.86207 | 0.009679 | 0.030323 | -2.99415 |
| FBXW5     | -0.38953 | 0.307946 | -2.86188 | 0.009683 | 0.030331 | -2.99453 |
| LOC15100  | -1.0973  | -0.11711 | -2.86176 | 0.009685 | 0.030334 | -2.99479 |
| LAMB2P1   | -0.8063  | 0.29526  | -2.86092 | 0.009703 | 0.030386 | -2.99651 |
| RHOG      | -0.65269 | 0.57226  | -2.86023 | 0.009718 | 0.030428 | -2.99794 |
| C11orf40  | -0.53181 | 0.011786 | -2.86605 | 0.009937 | 0.030956 | -2.99825 |
| CHMP1A    | -0.68136 | 0.426257 | -2.85936 | 0.009737 | 0.030482 | -2.99974 |
| HTR6      | 0.799104 | -0.19243 | 2.858625 | 0.009753 | 0.030527 | -3.00125 |
| Dec-01    | -0.42222 | -0.04068 | -2.86438 | 0.009974 | 0.031045 | -3.00165 |
| HAS3      | 0.895918 | 0.042678 | 2.848056 | 0.010336 | 0.031928 | -3.00199 |
| SEC31B    | -0.50524 | 0.256565 | -2.85815 | 0.009763 | 0.030554 | -3.00223 |
| PPP1CB    | -1.42498 | 0.282368 | -2.85808 | 0.009765 | 0.030554 | -3.00237 |
| PMS2P4    | -0.48418 | 0.341497 | -2.85789 | 0.009769 | 0.030562 | -3.00277 |
| MEX3A     | 0.589618 | -0.45666 | 2.857785 | 0.009771 | 0.030564 | -3.00299 |
| IRF7      | -1.19534 | 1.296864 | -2.8576  | 0.009775 | 0.030567 | -3.00336 |
| C21orf104 | 0.602289 | -0.44109 | 2.857367 | 0.00978  | 0.030578 | -3.00385 |
| ATP6V0E1  | -0.66526 | 0.28592  | -2.85651 | 0.009799 | 0.030631 | -3.00561 |
| C2orf84   | -0.62591 | 0.082109 | -2.85641 | 0.009801 | 0.030633 | -3.00581 |
| MRM1      | 0.649824 | -0.20232 | 2.856005 | 0.00981  | 0.030656 | -3.00665 |
| ZNF383    | -0.95903 | 0.165192 | -2.85577 | 0.009815 | 0.030667 | -3.00714 |
| DDO       | 1.05444  | -0.47315 | 2.840534 | 0.011363 | 0.034328 | -3.00872 |
| ASB5      | -0.95313 | 0.358888 | -2.85429 | 0.009847 | 0.030763 | -3.01019 |
| RHOT1     | -1.38527 | 0.891672 | -2.85379 | 0.009858 | 0.030788 | -3.01123 |
| ATP6AP1   | -0.59387 | 0.384725 | -2.85378 | 0.009858 | 0.030788 | -3.01123 |
| OIP5      | -1.44897 | 0.809175 | -2.8535  | 0.009864 | 0.030802 | -3.01182 |
| KLRC1     | 0.550865 | -0.45946 | 2.852544 | 0.009885 | 0.030853 | -3.01379 |
| PRPF8     | 0.689421 | -0.22677 | 2.851761 | 0.009903 | 0.030892 | -3.0154  |
| LOH12CR2  | -0.48091 | 0.029784 | -2.85171 | 0.009904 | 0.030892 | -3.01551 |

|           |          |          |          |          |          |          |
|-----------|----------|----------|----------|----------|----------|----------|
| MTMR7     | -0.54061 | -0.00792 | -2.85169 | 0.009904 | 0.030892 | -3.01554 |
| GBP1      | -2.02859 | 1.351907 | -2.85169 | 0.009904 | 0.030892 | -3.01555 |
| FN3KRP    | 0.770606 | -0.47084 | 2.851436 | 0.00991  | 0.030902 | -3.01607 |
| LOC90499  | -1.0014  | 0.511672 | -2.85132 | 0.009912 | 0.030902 | -3.0163  |
| SUB1      | -1.52378 | 0.300698 | -2.8513  | 0.009913 | 0.030902 | -3.01636 |
| BACE1     | 0.748998 | -0.32016 | 2.851196 | 0.009915 | 0.030902 | -3.01656 |
| PSMB1     | -0.49073 | 0.087828 | -2.85118 | 0.009915 | 0.030902 | -3.01661 |
| RPL13A    | 1.12872  | -0.8218  | 2.850698 | 0.009926 | 0.03093  | -3.01759 |
| LOC10027  | -0.70453 | 0.597891 | -2.85019 | 0.009937 | 0.030956 | -3.01864 |
| OLFM2     | -0.63733 | 0.68871  | -2.84996 | 0.009942 | 0.030965 | -3.0191  |
| KIAA0947  | -0.69305 | 0.21697  | -2.84991 | 0.009943 | 0.030965 | -3.01922 |
| PROCR     | 0.949287 | -0.4557  | 2.849162 | 0.00996  | 0.031006 | -3.02075 |
| C15orf39  | 0.702703 | -0.20652 | 2.848392 | 0.009977 | 0.031046 | -3.02234 |
| ZNF45     | -0.78316 | 0.45603  | -2.8479  | 0.009988 | 0.031073 | -3.02335 |
| GOLGA2P2  | 0.797698 | -0.36531 | 2.83724  | 0.010583 | 0.032556 | -3.02388 |
| MAGIX     | -0.58006 | 0.519291 | -2.84734 | 0.01     | 0.031106 | -3.02449 |
| PKD1L3    | -0.54121 | 0.069028 | -2.85891 | 0.010486 | 0.032304 | -3.02532 |
| SLC27A6   | 1.367099 | -1.17985 | 2.816502 | 0.012488 | 0.03679  | -3.02636 |
| DYNLT1    | -1.09794 | 0.408054 | -2.84587 | 0.010033 | 0.031203 | -3.02753 |
| SEMA6D    | -0.87714 | 0.301112 | -2.84572 | 0.010036 | 0.031204 | -3.02784 |
| ATPAF1-AS | 0.693106 | -1.10917 | 2.845653 | 0.010038 | 0.031204 | -3.02797 |
| C6orf57   | -0.72798 | 0.250191 | -2.8454  | 0.010043 | 0.031216 | -3.02849 |
| TNIP2     | -0.85633 | 0.700191 | -2.84514 | 0.010049 | 0.031228 | -3.02904 |
| WBSCR22   | 0.682772 | -0.30819 | 2.845079 | 0.01005  | 0.031228 | -3.02916 |
| SRSF1     | -0.75833 | 0.300691 | -2.84424 | 0.010069 | 0.031282 | -3.03089 |
| HHIPL2    | -0.57269 | 0.386422 | -2.84414 | 0.010071 | 0.031283 | -3.03108 |
| GKN1      | -0.65449 | 0.035253 | -2.844   | 0.010074 | 0.031288 | -3.03137 |
| HSFX1     | 0.611858 | -0.21243 | 2.843882 | 0.010077 | 0.031292 | -3.03162 |
| CETN1     | -0.64619 | -0.02984 | -2.8402  | 0.010915 | 0.033344 | -3.0321  |
| BHLHB9    | -0.45833 | 0.086081 | -2.84905 | 0.010313 | 0.031864 | -3.0328  |
| ANKRD40   | -0.79456 | 0.61624  | -2.84327 | 0.010091 | 0.031324 | -3.03289 |
| OXCT2     | 0.520072 | -0.70965 | 2.843038 | 0.010096 | 0.031335 | -3.03335 |
| ARID1A    | -1.00447 | 0.960991 | -2.84276 | 0.010102 | 0.031345 | -3.03393 |
| LCE1F     | 0.529285 | -0.59533 | 2.842749 | 0.010102 | 0.031345 | -3.03395 |
| PNPLA5    | 0.591394 | -0.42247 | 2.842672 | 0.010104 | 0.031346 | -3.03411 |
| DDX39B    | -0.34819 | 0.12897  | -2.84242 | 0.01011  | 0.031358 | -3.03463 |
| VBP1      | -0.84335 | -0.00603 | -2.84233 | 0.010112 | 0.031359 | -3.03482 |
| G2E3      | -0.72846 | 0.052299 | -2.8422  | 0.010115 | 0.031359 | -3.03508 |
| GRM8      | 0.613177 | -0.43207 | 2.853767 | 0.010602 | 0.032596 | -3.03562 |
| MTCH2     | -0.48934 | 0.174006 | -2.8418  | 0.010124 | 0.031381 | -3.03589 |
| KRTAP15-1 | 0.681601 | -0.63963 | 2.845692 | 0.01124  | 0.034066 | -3.03632 |
| HSPA14    | -0.77834 | 0.00705  | -2.84145 | 0.010131 | 0.031401 | -3.03662 |
| CD247     | 1.379628 | -0.56276 | 2.841337 | 0.010134 | 0.031403 | -3.03685 |
| ZBED2     | -0.83688 | 0.546687 | -2.84126 | 0.010136 | 0.031403 | -3.037   |
| SLC38A5   | 1.264752 | -0.49069 | 2.841209 | 0.010137 | 0.031403 | -3.03712 |
| NFKBIB    | -0.58589 | 0.547436 | -2.8411  | 0.010139 | 0.031405 | -3.03733 |
| INE1      | 0.515487 | -0.81925 | 2.840823 | 0.010146 | 0.03142  | -3.03791 |

|           |          |          |          |          |          |          |
|-----------|----------|----------|----------|----------|----------|----------|
| TCN1      | -1.9686  | 1.130539 | -2.84075 | 0.010147 | 0.03142  | -3.03807 |
| KIAA1530  | -1.07116 | 0.93505  | -2.84026 | 0.010158 | 0.031449 | -3.03908 |
| SRD5A1    | -0.54904 | 0.346824 | -2.83973 | 0.01017  | 0.031477 | -3.04015 |
| RRM2      | -2.27149 | 1.489853 | -2.83972 | 0.01017  | 0.031477 | -3.04018 |
| SNCG      | 0.482414 | -0.40223 | 2.839096 | 0.010184 | 0.031515 | -3.04146 |
| SLC28A1   | 0.46769  | -0.16336 | 2.838959 | 0.010188 | 0.03152  | -3.04174 |
| SPACA7    | 0.982178 | -0.64346 | 2.828353 | 0.01079  | 0.033064 | -3.04183 |
| MYL6B     | -0.62714 | 0.429326 | -2.83871 | 0.010193 | 0.031532 | -3.04226 |
| ACTR5     | 0.842113 | -0.49535 | 2.838571 | 0.010196 | 0.031537 | -3.04254 |
| PPP4R1    | -1.0709  | 0.695848 | -2.83805 | 0.010208 | 0.031568 | -3.04361 |
| FLJ43681  | -0.50153 | 0.465622 | -2.83791 | 0.010211 | 0.031573 | -3.04389 |
| TBC1D12   | 0.928274 | -0.19369 | 2.837424 | 0.010222 | 0.031601 | -3.0449  |
| FGF2      | -0.70591 | 0.452311 | -2.83737 | 0.010224 | 0.031601 | -3.04501 |
| MOB4      | -1.16928 | -0.11571 | -2.8247  | 0.010876 | 0.033245 | -3.04921 |
| TMEM199   | -0.50575 | 0.257376 | -2.8353  | 0.010271 | 0.031741 | -3.04927 |
| CHRNA3    | 0.908464 | -0.80387 | 2.884623 | 0.013852 | 0.039998 | -3.05112 |
| FIGF      | -0.50469 | -0.16876 | -2.84406 | 0.010825 | 0.033142 | -3.05504 |
| SETD4     | -0.44553 | 0.328049 | -2.83219 | 0.010341 | 0.031941 | -3.05566 |
| UBASH3B   | -1.05537 | 0.499459 | -2.83202 | 0.010345 | 0.031945 | -3.056   |
| FAM134B   | -1.02756 | 0.213068 | -2.83198 | 0.010346 | 0.031945 | -3.05608 |
| PDZD8     | -0.9431  | 0.430537 | -2.8319  | 0.010348 | 0.031946 | -3.05625 |
| HCG4      | 1.150729 | -0.70241 | 2.837943 | 0.014098 | 0.040539 | -3.05752 |
| RMI1      | -0.84628 | 0.150677 | -2.83124 | 0.010363 | 0.031987 | -3.0576  |
| NUDT1     | 0.633344 | -0.40048 | 2.830786 | 0.010374 | 0.032015 | -3.05854 |
| MAPK4     | -0.50503 | 0.220554 | -2.83064 | 0.010377 | 0.032015 | -3.05884 |
| FAM160A1  | 1.090964 | -0.04845 | 2.830632 | 0.010377 | 0.032015 | -3.05885 |
| ZNF207    | -0.85127 | 0.185842 | -2.83008 | 0.01039  | 0.032049 | -3.05998 |
| ZNF443    | -1.18602 | 0.3166   | -2.83552 | 0.010622 | 0.032649 | -3.06025 |
| NHS       | 1.147248 | -0.70941 | 2.859087 | 0.012722 | 0.037377 | -3.06109 |
| PLAC9     | -0.70448 | 0.502329 | -2.82868 | 0.010422 | 0.032144 | -3.06286 |
| TRIM38    | -1.28182 | 1.163071 | -2.8284  | 0.010429 | 0.032154 | -3.06344 |
| ZNF347    | -1.28343 | 0.80208  | -2.82839 | 0.010429 | 0.032154 | -3.06346 |
| SGOL2     | -1.26035 | 0.457895 | -2.84579 | 0.011238 | 0.034065 | -3.06404 |
| LINC00115 | -0.90071 | 0.526693 | -2.82789 | 0.01044  | 0.032185 | -3.06449 |
| CFDP1     | -1.06421 | 1.106286 | -2.82778 | 0.010443 | 0.032188 | -3.06471 |
| CEP41     | -0.79515 | 0.999874 | -2.82714 | 0.010458 | 0.032228 | -3.06603 |
| LEUTX     | -0.61446 | 0.246076 | -2.81607 | 0.011082 | 0.033708 | -3.06662 |
| CLEC4A    | -1.29679 | 0.213114 | -2.82647 | 0.010473 | 0.032271 | -3.0674  |
| GPRASP2   | 1.758306 | -1.41923 | 2.745989 | 0.015881 | 0.044536 | -3.06872 |
| FHL3      | -0.98245 | 1.068773 | -2.82534 | 0.010499 | 0.032339 | -3.06972 |
| PTGDR2    | 1.797361 | -0.70585 | 2.825302 | 0.0105   | 0.032339 | -3.06979 |
| FBN2      | -0.67374 | 0.19445  | -2.82523 | 0.010502 | 0.03234  | -3.06995 |
| KCNE1     | -1.03224 | 0.520554 | -2.82495 | 0.010508 | 0.032354 | -3.07052 |
| DMRT2     | 1.262164 | -0.45616 | 2.830185 | 0.010747 | 0.032959 | -3.07106 |
| TM9SF2    | -0.8364  | 0.201528 | -2.82401 | 0.01053  | 0.032417 | -3.07245 |
| NDUFS1    | -0.86907 | 0.578388 | -2.82376 | 0.010536 | 0.032429 | -3.07296 |
| BBS9      | -1.15719 | 0.312401 | -2.82295 | 0.010555 | 0.032483 | -3.07462 |

|           |          |          |          |          |          |          |
|-----------|----------|----------|----------|----------|----------|----------|
| FBXO33    | -0.71586 | 0.052723 | -2.8226  | 0.010563 | 0.032503 | -3.07535 |
| TP53INP2  | 0.670925 | -0.02911 | 2.827889 | 0.010801 | 0.033087 | -3.07571 |
| EPAS1     | -1.30168 | 0.748262 | -2.82171 | 0.010584 | 0.032556 | -3.07716 |
| S100G     | 0.91792  | -0.13593 | 2.821269 | 0.010594 | 0.032583 | -3.07807 |
| C1orf110  | -0.96291 | 0.313844 | -2.821   | 0.010601 | 0.032596 | -3.07862 |
| RPUSD2    | 0.828313 | -0.33191 | 2.820756 | 0.010606 | 0.032605 | -3.07912 |
| TCP11     | -0.81659 | -0.0058  | -2.81935 | 0.010639 | 0.032691 | -3.082   |
| BGN       | 0.66217  | -0.25841 | 2.815069 | 0.011519 | 0.034671 | -3.08209 |
| SLC13A5   | 0.636462 | -0.26369 | 2.830177 | 0.011152 | 0.033868 | -3.08275 |
| LOC339894 | -0.76159 | 0.262954 | -2.81861 | 0.010657 | 0.032739 | -3.08352 |
| Mar-09    | 0.789234 | -0.16894 | 2.81836  | 0.010663 | 0.032752 | -3.08403 |
| MAPK13    | -0.98075 | 0.699091 | -2.81778 | 0.010676 | 0.032789 | -3.08522 |
| GPANK1    | -0.46183 | 0.387129 | -2.81698 | 0.010695 | 0.032842 | -3.08686 |
| DMGDH     | 0.686839 | -0.17827 | 2.816286 | 0.010712 | 0.032887 | -3.08828 |
| SH3GL3    | 0.625961 | -0.48425 | 2.816094 | 0.010716 | 0.032896 | -3.08868 |
| DIABLO    | -0.42135 | 0.179956 | -2.81593 | 0.01072  | 0.032897 | -3.08902 |
| H2AFY     | -0.50692 | 0.031556 | -2.81589 | 0.010721 | 0.032897 | -3.08909 |
| TGDS      | -0.77431 | 0.111716 | -2.81587 | 0.010722 | 0.032897 | -3.08913 |
| HOOK3     | -1.24574 | 0.690883 | -2.81529 | 0.010735 | 0.032934 | -3.09031 |
| PTPN13    | 1.036887 | -0.73304 | 2.810861 | 0.011623 | 0.034882 | -3.09045 |
| CD300E    | 0.68232  | -0.30675 | 2.814763 | 0.010748 | 0.032959 | -3.0914  |
| DHX9      | -0.89679 | 0.774993 | -2.81474 | 0.010748 | 0.032959 | -3.09145 |
| NR5A2     | 0.588973 | -0.40129 | 2.813491 | 0.010778 | 0.033044 | -3.09401 |
| EML6      | 0.587635 | -0.13452 | 2.813229 | 0.010784 | 0.033058 | -3.09455 |
| PROC      | 0.848964 | -0.20343 | 2.805132 | 0.012784 | 0.037521 | -3.09481 |
| KCTD9     | -0.81496 | 0.095928 | -2.81302 | 0.010789 | 0.033064 | -3.09497 |
| ACACB     | 0.768311 | -0.24556 | 2.812579 | 0.0108   | 0.033087 | -3.09588 |
| LSAMP     | -0.56114 | 0.092258 | -2.81246 | 0.010803 | 0.033089 | -3.09612 |
| MUC3      | -0.64432 | 0.196574 | -2.81235 | 0.010805 | 0.033091 | -3.09634 |
| ANK3      | 0.720259 | -0.72911 | 2.817551 | 0.011047 | 0.033639 | -3.09663 |
| CLN8      | -0.56908 | 0.313053 | -2.81193 | 0.010815 | 0.033117 | -3.09721 |
| C14orf23  | 1.158045 | -0.14045 | 2.816525 | 0.011071 | 0.033685 | -3.09871 |
| LOC388630 | 0.555526 | -0.43319 | 2.810861 | 0.010841 | 0.033185 | -3.0994  |
| DOK1      | -0.94471 | 0.895443 | -2.81074 | 0.010844 | 0.033189 | -3.09964 |
| TRAM2     | 0.797891 | -0.08014 | 2.810664 | 0.010846 | 0.033189 | -3.0998  |
| RECQL     | -0.81014 | 0.121557 | -2.81054 | 0.010849 | 0.033191 | -3.10005 |
| CNOT6L    | -0.85591 | 0.553363 | -2.81047 | 0.01085  | 0.033191 | -3.10019 |
| FCRL2     | -1.40759 | 1.176835 | -2.81043 | 0.010851 | 0.033191 | -3.10028 |
| ZNF81     | -0.8047  | 0.383716 | -2.81555 | 0.011095 | 0.033734 | -3.10068 |
| MTX2      | -0.88838 | 0.201617 | -2.80963 | 0.01087  | 0.033241 | -3.10191 |
| LRIG1     | 0.636376 | -0.46299 | 2.809596 | 0.010871 | 0.033241 | -3.10198 |
| FAM35B    | -0.7184  | 0.141778 | -2.80953 | 0.010873 | 0.033241 | -3.10211 |
| PF4       | 1.121003 | -0.24765 | 2.808719 | 0.010892 | 0.03329  | -3.10378 |
| SRPX2     | 0.765688 | -0.4004  | 2.8108   | 0.012096 | 0.035905 | -3.1046  |
| HFE2      | -0.44588 | 0.1186   | -2.80829 | 0.010903 | 0.033317 | -3.10467 |
| SURF2     | 0.601965 | -0.26448 | 2.808044 | 0.010909 | 0.03333  | -3.10516 |
| FSD1L     | 1.195041 | -1.18522 | 2.766071 | 0.015269 | 0.043178 | -3.10619 |

|          |          |          |          |          |          |          |
|----------|----------|----------|----------|----------|----------|----------|
| FLJ30064 | -1.27259 | 0.440213 | -2.80744 | 0.010923 | 0.033364 | -3.10641 |
| OBSL1    | -1.37291 | 0.420545 | -2.80718 | 0.010929 | 0.033378 | -3.10692 |
| ADSL     | -0.71318 | 0.397486 | -2.80702 | 0.010933 | 0.033384 | -3.10726 |
| ABLM3    | 1.08884  | -0.01956 | 2.80693  | 0.010935 | 0.033386 | -3.10744 |
| SLC44A5  | 1.411584 | -1.19748 | 2.773558 | 0.013641 | 0.039545 | -3.10779 |
| CRIP1    | -0.74907 | 0.207553 | -2.80602 | 0.010958 | 0.033448 | -3.10931 |
| LOC44160 | -0.53827 | -0.04063 | -2.79474 | 0.011608 | 0.034854 | -3.10955 |
| FZD4     | -0.57719 | -0.01815 | -2.8054  | 0.010972 | 0.033488 | -3.11057 |
| ND6      | 0.983617 | -0.47871 | 2.805277 | 0.010975 | 0.033491 | -3.11082 |
| DNAJB14  | -0.99555 | 0.247652 | -2.80522 | 0.010977 | 0.033491 | -3.11093 |
| VMAC     | -0.66923 | 0.372563 | -2.80506 | 0.010981 | 0.033498 | -3.11128 |
| MAS1L    | 0.58865  | -0.41499 | 2.8045   | 0.010994 | 0.033534 | -3.11241 |
| KRBA1    | 0.522788 | -0.23464 | 2.804276 | 0.011    | 0.033545 | -3.11287 |
| COG8     | -0.49221 | 0.458394 | -2.80415 | 0.011003 | 0.03355  | -3.11313 |
| KRBOX1   | 0.895787 | -0.21216 | 2.81479  | 0.011526 | 0.034686 | -3.11343 |
| TMED1    | -0.50438 | 0.093511 | -2.80383 | 0.011011 | 0.033565 | -3.11378 |
| PIAS2    | -0.46978 | 0.160158 | -2.80381 | 0.011011 | 0.033565 | -3.11383 |
| LOC10050 | -0.45203 | -0.09339 | -2.80306 | 0.011029 | 0.033615 | -3.11536 |
| LMTK3    | 0.56309  | -0.24331 | 2.802853 | 0.011034 | 0.033625 | -3.11578 |
| SPIN3    | 0.696318 | -0.42865 | 2.802542 | 0.011042 | 0.033639 | -3.11642 |
| SSX7     | 0.495733 | -0.06794 | 2.813259 | 0.011564 | 0.034773 | -3.11647 |
| PUF60    | 0.61129  | -0.20582 | 2.802448 | 0.011044 | 0.033639 | -3.11661 |
| LHFPL1   | -0.65043 | 0.171463 | -2.80762 | 0.011288 | 0.034143 | -3.1167  |
| BCMO1    | -0.46162 | 0.100564 | -2.80235 | 0.011047 | 0.033639 | -3.11681 |
| GSTA5    | -1.16099 | 0.245495 | -2.80231 | 0.011048 | 0.033639 | -3.1169  |
| MAP2K7   | 0.62997  | 0.00257  | 2.802094 | 0.011053 | 0.03365  | -3.11733 |
| ASAP1    | -1.40465 | 1.130744 | -2.80195 | 0.011057 | 0.033656 | -3.11764 |
| CLCA2    | -0.83359 | 0.119477 | -2.8067  | 0.01131  | 0.0342   | -3.11855 |
| RAMP3    | 0.532191 | -0.25764 | 2.801435 | 0.011069 | 0.033685 | -3.11868 |
| VHL      | -0.94599 | 0.574935 | -2.80134 | 0.011071 | 0.033685 | -3.11888 |
| CERS6    | -0.8705  | 0.329387 | -2.80106 | 0.011078 | 0.0337   | -3.11945 |
| USP17    | -0.70449 | -0.01452 | -2.80049 | 0.011092 | 0.033733 | -3.12062 |
| SLCO4A1  | -2.16349 | 1.335572 | -2.80033 | 0.011096 | 0.033734 | -3.12094 |
| ARF4     | -0.67701 | 0.166552 | -2.80013 | 0.011101 | 0.033744 | -3.12135 |
| IFITM3   | -0.79081 | 0.812261 | -2.79961 | 0.011114 | 0.033777 | -3.12241 |
| MUC8     | 0.435318 | -0.21347 | 2.799415 | 0.011118 | 0.033784 | -3.12281 |
| LOC10028 | -0.55775 | 0.059035 | -2.79938 | 0.011119 | 0.033784 | -3.12288 |
| HIST1H1B | 0.589248 | -0.15179 | 2.804397 | 0.011367 | 0.034335 | -3.1232  |
| LOC64283 | -1.03983 | 1.508164 | -2.79852 | 0.01114  | 0.033838 | -3.12464 |
| NR2E1    | 0.68448  | -0.31148 | 2.808963 | 0.011671 | 0.034998 | -3.12502 |
| S100A8   | -1.71393 | 0.234378 | -2.79757 | 0.011164 | 0.033894 | -3.12658 |
| DBH      | 0.988073 | -0.23762 | 2.79755  | 0.011164 | 0.033894 | -3.12662 |
| SLC2A6   | -0.74584 | 0.662246 | -2.79745 | 0.011167 | 0.033897 | -3.12683 |
| TPRG1L   | -0.53898 | 0.540818 | -2.79721 | 0.011173 | 0.033909 | -3.12731 |
| LOC11323 | -0.90025 | 0.960336 | -2.79696 | 0.011179 | 0.033923 | -3.12784 |
| TPRA1    | 0.364842 | -0.0803  | 2.796649 | 0.011187 | 0.033937 | -3.12846 |
| PLEKHG6  | 0.453084 | -0.39219 | 2.796623 | 0.011187 | 0.033937 | -3.12852 |

|           |          |          |          |          |          |          |
|-----------|----------|----------|----------|----------|----------|----------|
| SLC26A6   | -0.66673 | 0.542162 | -2.79596 | 0.011204 | 0.033982 | -3.12988 |
| FLJ44715  | 0.829395 | -0.69793 | 2.784613 | 0.011867 | 0.035433 | -3.12989 |
| WDR38     | 0.411292 | -0.31943 | 2.79559  | 0.011213 | 0.034004 | -3.13063 |
| ARL3      | -0.90655 | 0.306734 | -2.79548 | 0.011215 | 0.034007 | -3.13085 |
| EPB41L4A- | 0.906464 | -0.72729 | 2.794795 | 0.011232 | 0.034053 | -3.13225 |
| AGXT      | -0.9114  | 0.18753  | -2.79437 | 0.011243 | 0.03407  | -3.13313 |
| SPN       | 0.382294 | -0.36741 | 2.794031 | 0.011251 | 0.03409  | -3.13381 |
| KATNAL1   | -0.60218 | 0.347079 | -2.79376 | 0.011258 | 0.034103 | -3.13436 |
| BIK       | -1.17543 | 1.229491 | -2.79371 | 0.011259 | 0.034103 | -3.13447 |
| B4GALT6   | 0.573062 | -0.20537 | 2.793505 | 0.011264 | 0.034111 | -3.13489 |
| GTF2A2    | -0.549   | 0.081789 | -2.79344 | 0.011266 | 0.034111 | -3.13502 |
| AGR2      | 0.418758 | -0.32576 | 2.793404 | 0.011267 | 0.034111 | -3.13509 |
| MPP3      | 0.79928  | -0.05422 | 2.793209 | 0.011272 | 0.034118 | -3.13549 |
| PBK       | -1.27313 | 0.651068 | -2.79317 | 0.011273 | 0.034118 | -3.13557 |
| VDAC2     | -0.45858 | 0.437267 | -2.79292 | 0.011279 | 0.034131 | -3.13609 |
| EIF2AK2   | -1.36904 | 1.310615 | -2.79282 | 0.011281 | 0.034133 | -3.13629 |
| SUPT5H    | 0.504735 | -0.0828  | 2.792603 | 0.011287 | 0.034143 | -3.13673 |
| DUSP27    | -0.86372 | 0.113735 | -2.79231 | 0.011294 | 0.034156 | -3.13733 |
| PACSIN3   | 0.665401 | -0.23872 | 2.780446 | 0.011974 | 0.035657 | -3.13825 |
| ZSWIM5    | 0.527316 | -0.63421 | 2.802043 | 0.011845 | 0.035386 | -3.13879 |
| TTF1      | -0.79685 | 0.692539 | -2.79158 | 0.011312 | 0.0342   | -3.13881 |
| C8orf34   | 0.367076 | -0.33817 | 2.802021 | 0.011845 | 0.035386 | -3.13883 |
| SCN9A     | -1.34097 | 0.773667 | -2.79084 | 0.011331 | 0.034246 | -3.14032 |
| SLC16A8   | 0.524299 | -0.47985 | 2.790834 | 0.011331 | 0.034246 | -3.14034 |
| TMEM170   | -0.51018 | 0.126111 | -2.79014 | 0.011348 | 0.034293 | -3.14176 |
| LOC100288 | 0.797185 | -0.38955 | 2.778592 | 0.012023 | 0.03574  | -3.14197 |
| BCCIP     | -1.55613 | 0.914396 | -2.77833 | 0.01203  | 0.035746 | -3.1425  |
| NKAPP1    | 0.638466 | -0.28248 | 2.789544 | 0.011363 | 0.034328 | -3.14297 |
| LAPTM4B   | -0.91148 | 0.801217 | -2.78928 | 0.01137  | 0.034337 | -3.1435  |
| PI4K2A    | 0.424376 | -0.06156 | 2.789015 | 0.011376 | 0.034352 | -3.14405 |
| PRH2      | -0.39522 | 0.024632 | -2.78892 | 0.011379 | 0.034354 | -3.14425 |
| ECHS1     | 0.618934 | -0.25425 | 2.788811 | 0.011382 | 0.034357 | -3.14447 |
| MANEAL    | 1.008315 | -0.63802 | 2.803766 | 0.016084 | 0.044957 | -3.14454 |
| FAM24A    | 0.658378 | -0.09355 | 2.77695  | 0.012066 | 0.035827 | -3.14526 |
| USP42     | -0.7887  | 0.597693 | -2.78802 | 0.011401 | 0.034402 | -3.14609 |
| FOXA2     | 0.593152 | -0.5677  | 2.787902 | 0.011404 | 0.034402 | -3.14632 |
| PLSCR3    | 0.780928 | -0.19695 | 2.787896 | 0.011405 | 0.034402 | -3.14634 |
| HFE       | 0.467067 | -0.18136 | 2.787883 | 0.011405 | 0.034402 | -3.14636 |
| PPHLN1    | -0.62404 | 0.563192 | -2.78787 | 0.011405 | 0.034402 | -3.1464  |
| TTY8      | 0.566549 | -0.14698 | 2.787538 | 0.011414 | 0.034422 | -3.14707 |
| PSIP1     | -0.95994 | 0.712006 | -2.78734 | 0.011419 | 0.034432 | -3.14748 |
| AGPAT4    | -0.66044 | 0.493459 | -2.78718 | 0.011423 | 0.034438 | -3.1478  |
| MFI2      | 0.310196 | -0.20838 | 2.7866   | 0.011437 | 0.034473 | -3.14898 |
| CALR      | 0.540991 | -0.05335 | 2.786578 | 0.011438 | 0.034473 | -3.14903 |
| CIC       | -0.62356 | 0.529287 | -2.78555 | 0.011464 | 0.034539 | -3.15113 |
| SPCS3     | -1.09339 | 0.253174 | -2.78554 | 0.011464 | 0.034539 | -3.15115 |
| POC5      | -0.62115 | 0.346527 | -2.7855  | 0.011465 | 0.034539 | -3.15122 |

|           |          |          |          |          |          |          |
|-----------|----------|----------|----------|----------|----------|----------|
| LOC100655 | -1.25839 | 0.846747 | -2.78534 | 0.011469 | 0.034546 | -3.15156 |
| MIEN1     | -0.44324 | 0.374015 | -2.78501 | 0.011477 | 0.034566 | -3.15223 |
| NLGN4Y    | 0.628897 | -0.74885 | 2.759781 | 0.014691 | 0.041833 | -3.15299 |
| CCDC132   | 0.618517 | -0.15822 | 2.784592 | 0.011488 | 0.034593 | -3.15308 |
| HIST1H2AL | -0.6975  | 0.217862 | -2.78418 | 0.011498 | 0.034615 | -3.15392 |
| NUDT21    | -0.47518 | 0.08914  | -2.78415 | 0.011499 | 0.034615 | -3.15398 |
| YPLR6490  | 0.905321 | -0.42206 | 2.799781 | 0.012379 | 0.036552 | -3.15424 |
| LOC541475 | 0.695868 | -0.54133 | 2.764838 | 0.01332  | 0.03878  | -3.15582 |
| DAPL1     | -1.0676  | 0.240764 | -2.77165 | 0.012205 | 0.036163 | -3.15589 |
| LSM10     | -0.39055 | 0.214467 | -2.78295 | 0.011529 | 0.034691 | -3.15642 |
| TTLL7     | -0.68742 | 0.325648 | -2.78217 | 0.011549 | 0.034741 | -3.15803 |
| CRELD1    | 0.379325 | -0.10777 | 2.782163 | 0.01155  | 0.034741 | -3.15803 |
| RGNEF     | -0.3626  | -0.05771 | -2.78205 | 0.011552 | 0.034744 | -3.15827 |
| C2orf83   | 0.646464 | -0.36698 | 2.771491 | 0.013699 | 0.039678 | -3.15892 |
| CHTF8     | -0.61494 | 0.661322 | -2.78113 | 0.011576 | 0.034804 | -3.16014 |
| RHOQ      | -0.97185 | 0.752278 | -2.78094 | 0.011581 | 0.034813 | -3.16052 |
| ANKRD27   | -0.35033 | -0.0123  | -2.78079 | 0.011585 | 0.03482  | -3.16084 |
| GSG2      | -0.88096 | 0.449086 | -2.7806  | 0.01159  | 0.034829 | -3.16123 |
| VPS41     | -0.53978 | 0.122095 | -2.78047 | 0.011593 | 0.034833 | -3.16148 |
| DLG3      | 1.120584 | -0.54635 | 2.780245 | 0.011598 | 0.034839 | -3.16194 |
| SPRN      | 0.552554 | -0.36799 | 2.780213 | 0.011599 | 0.034839 | -3.16201 |
| RB1CC1    | -1.02982 | 0.067857 | -2.78019 | 0.0116   | 0.034839 | -3.16205 |
| SURF1     | -0.29961 | 0.022858 | -2.77988 | 0.011608 | 0.034854 | -3.16268 |
| NAV3      | 0.64297  | -0.35953 | 2.787929 | 0.013244 | 0.038652 | -3.16307 |
| DEFB106B  | -0.7125  | 0.178337 | -2.77946 | 0.011618 | 0.034873 | -3.16354 |
| FOSB      | 1.048501 | -0.65651 | 2.779066 | 0.011629 | 0.034893 | -3.16435 |
| SYCP1     | 0.506627 | -0.40312 | 2.77865  | 0.011639 | 0.03492  | -3.16519 |
| KISS1     | 0.682019 | -0.45413 | 2.778441 | 0.011645 | 0.03493  | -3.16562 |
| GOLGA4    | -0.56191 | 0.233993 | -2.77833 | 0.011648 | 0.034934 | -3.16585 |
| SPESP1    | 0.680137 | -0.34293 | 2.782601 | 0.011919 | 0.035534 | -3.16713 |
| PI15      | -0.37537 | -0.07502 | -2.78232 | 0.011926 | 0.035545 | -3.16769 |
| CTTN      | 0.521018 | -0.16241 | 2.777224 | 0.011676 | 0.035008 | -3.1681  |
| ZNF341    | -0.71739 | 0.573574 | -2.77711 | 0.011679 | 0.035012 | -3.16834 |
| JSRP1     | 0.843882 | -0.05032 | 2.776851 | 0.011685 | 0.035026 | -3.16886 |
| RARRES2   | 0.81546  | -0.58043 | 2.789299 | 0.016519 | 0.045925 | -3.16946 |
| LOC145755 | -0.59606 | -0.07316 | -2.77733 | 0.012976 | 0.038005 | -3.16983 |
| FAM18B2   | -0.97693 | 0.224497 | -2.77633 | 0.011699 | 0.035061 | -3.16992 |
| TTC5      | -0.48157 | 0.192238 | -2.77517 | 0.011729 | 0.035144 | -3.17227 |
| ULBP2     | -0.60732 | 0.273295 | -2.77509 | 0.011731 | 0.035144 | -3.17245 |
| TLX1      | 0.662222 | -0.28745 | 2.775044 | 0.011732 | 0.035144 | -3.17254 |
| ADAD2     | 0.617279 | -0.35592 | 2.774293 | 0.011751 | 0.035197 | -3.17407 |
| SLC25A43  | -1.5372  | 0.772517 | -2.77392 | 0.011761 | 0.03522  | -3.17483 |
| RIC8A     | -0.27375 | 0.240793 | -2.77314 | 0.011781 | 0.03527  | -3.17642 |
| VPS37D    | 0.397199 | -0.15038 | 2.772921 | 0.011787 | 0.035282 | -3.17686 |
| ADAMTS15  | 1.184203 | -0.2829  | 2.770479 | 0.016033 | 0.044866 | -3.17719 |
| LGALS3BP  | -1.16127 | 0.730432 | -2.77246 | 0.011799 | 0.03531  | -3.17781 |
| RBM39     | -0.86952 | 0.476342 | -2.77242 | 0.0118   | 0.03531  | -3.17787 |



|           |          |          |          |          |          |          |
|-----------|----------|----------|----------|----------|----------|----------|
| LOC728690 | 0.465644 | -0.22738 | 2.772287 | 0.011803 | 0.035314 | -3.17815 |
| C9orf40   | 0.674868 | -0.14685 | 2.77216  | 0.011807 | 0.035314 | -3.17841 |
| UHRF1BP1  | -0.88922 | 0.27965  | -2.77216 | 0.011807 | 0.035314 | -3.17841 |
| IFT20     | -1.02334 | -0.05461 | -2.77172 | 0.011818 | 0.035343 | -3.17931 |
| KGFLP1    | -1.00149 | 0.126133 | -2.77155 | 0.011823 | 0.035345 | -3.17965 |
| GOT2      | 0.524762 | -0.31194 | 2.771549 | 0.011823 | 0.035345 | -3.17965 |
| PCGF3     | -1.19968 | 0.9226   | -2.77139 | 0.011827 | 0.035352 | -3.17998 |
| MOV10L1   | 0.924916 | -0.21472 | 2.771222 | 0.011831 | 0.03536  | -3.18032 |
| LOC284561 | -0.61003 | 0.122006 | -2.7711  | 0.011834 | 0.035364 | -3.18056 |
| HEMGN     | 1.039443 | -0.45601 | 2.712248 | 0.016159 | 0.045138 | -3.18124 |
| CXCL13    | -0.71231 | 0.306917 | -2.77556 | 0.012102 | 0.035918 | -3.18129 |
| SIAE      | -0.70352 | 0.300303 | -2.77029 | 0.011855 | 0.035407 | -3.18222 |
| RAB5C     | -0.68811 | 0.565299 | -2.77027 | 0.011856 | 0.035407 | -3.18227 |
| SUV39H2   | -0.65457 | 0.253893 | -2.76975 | 0.011869 | 0.035437 | -3.18331 |
| ZNF630    | -0.53057 | 0.336355 | -2.76956 | 0.011875 | 0.035446 | -3.1837  |
| CR2       | -0.86499 | 0.520388 | -2.76942 | 0.011878 | 0.035452 | -3.18399 |
| FTHL17    | 0.690505 | -0.36695 | 2.769268 | 0.011882 | 0.035458 | -3.1843  |
| LYPLAL1   | -0.58733 | 0.241874 | -2.77398 | 0.012144 | 0.036014 | -3.18447 |
| F2RL3     | 0.597446 | -0.00274 | 2.768874 | 0.011892 | 0.035484 | -3.1851  |
| PCSK4     | 0.863985 | -0.2465  | 2.768707 | 0.011897 | 0.035491 | -3.18544 |
| MLNR      | -0.78731 | 0.214412 | -2.77325 | 0.012163 | 0.03606  | -3.18594 |
| AMY1C     | -0.78193 | 0.5782   | -2.76828 | 0.011908 | 0.03552  | -3.18632 |
| TUBA8     | 0.959168 | -0.11326 | 2.767975 | 0.011916 | 0.035534 | -3.18693 |
| MEIS3P1   | 0.897911 | -0.17381 | 2.772726 | 0.012177 | 0.036084 | -3.18698 |
| MAPK9     | -0.80804 | 0.585828 | -2.76791 | 0.011918 | 0.035534 | -3.18706 |
| DYM       | -0.39807 | 0.166461 | -2.76769 | 0.011923 | 0.035543 | -3.1875  |
| SYNPO2L   | 0.701821 | -0.5831  | 2.741075 | 0.013489 | 0.03919  | -3.18766 |
| PARM1     | 0.901418 | -0.09219 | 2.767514 | 0.011928 | 0.035547 | -3.18786 |
| PRF1      | 1.512005 | -0.5316  | 2.766818 | 0.011946 | 0.035596 | -3.18928 |
| CD1E      | 0.646048 | -0.42535 | 2.766246 | 0.011961 | 0.035635 | -3.19044 |
| FAM101A   | 0.59124  | -0.35213 | 2.765878 | 0.011971 | 0.035656 | -3.19119 |
| LOC100506 | 0.57702  | -0.04714 | 2.76584  | 0.011972 | 0.035656 | -3.19127 |
| SLC12A8   | -0.68214 | 0.298431 | -2.7655  | 0.011981 | 0.035666 | -3.19195 |
| TIPARP    | -1.07196 | 0.014032 | -2.76548 | 0.011982 | 0.035666 | -3.192   |
| GTF2IRD2E | -0.70019 | 0.320629 | -2.76543 | 0.011983 | 0.035666 | -3.19209 |
| GTF2I     | -0.86207 | 0.810435 | -2.7649  | 0.011997 | 0.035702 | -3.19317 |
| FAM201A   | 0.596373 | -0.35067 | 2.764782 | 0.012    | 0.035707 | -3.19342 |
| RAX2      | 0.47712  | -0.19713 | 2.764618 | 0.012004 | 0.035714 | -3.19375 |
| STT3B     | -0.7634  | 0.21958  | -2.76445 | 0.012009 | 0.03572  | -3.19409 |
| OR7D4     | -0.67602 | 0.162157 | -2.76438 | 0.012011 | 0.03572  | -3.19425 |
| TTLL3     | 0.452229 | -0.14574 | 2.764271 | 0.012013 | 0.03572  | -3.19446 |
| GFM2      | -0.62533 | 0.089662 | -2.76427 | 0.012013 | 0.03572  | -3.19446 |
| LOC100133 | -0.42843 | 0.248019 | -2.76387 | 0.012024 | 0.03574  | -3.19527 |
| C15orf2   | -0.28897 | 0.033294 | -2.76369 | 0.012029 | 0.035746 | -3.19564 |
| RNF217    | -0.98297 | 0.710004 | -2.76285 | 0.012051 | 0.035804 | -3.19734 |
| C2orf27A  | 0.360378 | -0.32085 | 2.762581 | 0.012058 | 0.03582  | -3.1979  |
| CA5B      | -0.62853 | 0.679589 | -2.76237 | 0.012064 | 0.035827 | -3.19833 |

|           |          |          |          |          |          |          |
|-----------|----------|----------|----------|----------|----------|----------|
| LOC100130 | -0.96417 | 0.300991 | -2.76228 | 0.012066 | 0.035827 | -3.19851 |
| F11       | -0.39713 | 0.048059 | -2.76177 | 0.01208  | 0.035862 | -3.19954 |
| PLK4      | -0.90219 | 0.167229 | -2.76046 | 0.012115 | 0.035949 | -3.20221 |
| LINC00264 | 1.040212 | -0.08111 | 2.748407 | 0.012835 | 0.037631 | -3.20237 |
| KDR       | 0.461573 | -0.24874 | 2.760109 | 0.012124 | 0.035972 | -3.20292 |
| IFNA10    | 0.592619 | -0.29718 | 2.769505 | 0.012697 | 0.037321 | -3.20333 |
| WDFY4     | -0.67046 | 0.582878 | -2.75981 | 0.012132 | 0.03599  | -3.20352 |
| PFDN2     | -0.41689 | 0.568958 | -2.75957 | 0.012138 | 0.036003 | -3.20401 |
| ZNF154    | -0.57195 | 0.332695 | -2.75867 | 0.012162 | 0.03606  | -3.20585 |
| JOSD1     | -1.03626 | 0.960775 | -2.75856 | 0.012165 | 0.036061 | -3.20606 |
| FGFR3     | -0.85998 | 0.210711 | -2.7585  | 0.012167 | 0.036061 | -3.20619 |
| FEZF2     | 0.668165 | -0.17866 | 2.766925 | 0.012767 | 0.037487 | -3.20844 |
| KIAA0101  | -1.32628 | 0.476736 | -2.75678 | 0.012213 | 0.036177 | -3.20968 |
| SLC16A3   | -0.67276 | 0.487767 | -2.75676 | 0.012213 | 0.036177 | -3.20971 |
| SIX3      | 0.640773 | -0.291   | 2.744652 | 0.01294  | 0.03791  | -3.20986 |
| MZT2B     | 0.852567 | -0.66015 | 2.756391 | 0.012223 | 0.036201 | -3.21047 |
| LOC400095 | -0.8315  | 0.341029 | -2.75627 | 0.012227 | 0.036205 | -3.21072 |
| DOCK8     | -1.02387 | 0.979517 | -2.75535 | 0.012252 | 0.036273 | -3.2126  |
| SAMD4B    | -1.45179 | 1.266407 | -2.75503 | 0.01226  | 0.036293 | -3.21324 |
| GSS       | 0.374018 | -0.20932 | 2.754918 | 0.012263 | 0.036296 | -3.21347 |
| MT1E      | 0.83714  | -0.45136 | 2.754703 | 0.012269 | 0.036308 | -3.2139  |
| GIN5A     | 0.969936 | -0.92803 | 2.763302 | 0.017331 | 0.047588 | -3.21419 |
| NLRP12    | -1.03028 | 0.729407 | -2.75416 | 0.012283 | 0.036346 | -3.215   |
| C15orf23  | -0.8553  | 0.720125 | -2.75384 | 0.012292 | 0.036366 | -3.21564 |
| C21orf96  | 0.530086 | -0.11559 | 2.753665 | 0.012297 | 0.036374 | -3.21601 |
| TMPRSS13  | -0.46252 | 0.122971 | -2.75331 | 0.012306 | 0.036398 | -3.21673 |
| RPS2      | 0.76283  | -0.42318 | 2.753235 | 0.012308 | 0.036398 | -3.21688 |
| ALDH1A2   | -0.85183 | 0.228922 | -2.75284 | 0.012319 | 0.03642  | -3.21769 |
| ANO1      | -0.74435 | 0.067462 | -2.75282 | 0.01232  | 0.03642  | -3.21773 |
| SLC47A1   | 0.44503  | -0.04519 | 2.752662 | 0.012324 | 0.036427 | -3.21804 |
| LRRC46    | -0.51671 | 0.366528 | -2.75252 | 0.012328 | 0.036433 | -3.21833 |
| IL27      | -0.82531 | 0.335209 | -2.75229 | 0.012334 | 0.036446 | -3.21879 |
| MAFIP     | -0.60405 | 0.144226 | -2.75189 | 0.012345 | 0.036473 | -3.21961 |
| CCDC88B   | -0.64451 | 0.725415 | -2.75167 | 0.012351 | 0.036485 | -3.22006 |
| EAF2      | -1.32037 | 0.105715 | -2.75141 | 0.012358 | 0.0365   | -3.22059 |
| XAGE3     | 0.719626 | -0.32246 | 2.745785 | 0.016805 | 0.046455 | -3.22084 |
| MAP2K2    | -0.40049 | 0.559121 | -2.75108 | 0.012367 | 0.036521 | -3.22126 |
| IRX6      | -0.36939 | 0.067911 | -2.75031 | 0.012388 | 0.036572 | -3.22282 |
| CCL5      | 1.057243 | 0.136866 | 2.750135 | 0.012393 | 0.03658  | -3.22317 |
| FTCD      | 0.568511 | -0.12915 | 2.749553 | 0.012408 | 0.036616 | -3.22435 |
| IPO11     | 0.588213 | -0.57488 | 2.74955  | 0.012408 | 0.036616 | -3.22436 |
| CNFN      | 0.979741 | -0.25637 | 2.749208 | 0.012418 | 0.036638 | -3.22505 |
| RALY      | -0.6929  | 0.702979 | -2.74901 | 0.012423 | 0.036645 | -3.22546 |
| LOC100501 | -0.77948 | 0.146981 | -2.74898 | 0.012424 | 0.036645 | -3.22551 |
| LCN6      | 1.407026 | -0.76947 | 2.720298 | 0.0159   | 0.044571 | -3.22597 |
| ZNF135    | -0.9811  | 0.781292 | -2.7486  | 0.012434 | 0.03667  | -3.22628 |
| SRG7      | 0.498279 | -0.25945 | 2.748275 | 0.012443 | 0.036691 | -3.22694 |

|           |          |          |          |          |          |          |
|-----------|----------|----------|----------|----------|----------|----------|
| PRMT3     | -0.56892 | 0.139018 | -2.74805 | 0.01245  | 0.036704 | -3.22741 |
| APOC2     | -0.6705  | 0.105208 | -2.74779 | 0.012457 | 0.036719 | -3.22793 |
| MAP2K3    | 0.91803  | -0.51325 | 2.747608 | 0.012462 | 0.036728 | -3.2283  |
| AGPS      | -0.55308 | 0.306496 | -2.74692 | 0.01248  | 0.036778 | -3.22969 |
| ATRX      | -0.92286 | 0.527713 | -2.74669 | 0.012487 | 0.03679  | -3.23016 |
| LOC100505 | 0.967501 | -0.48262 | 2.699833 | 0.015256 | 0.043153 | -3.23085 |
| TIMM50    | 0.758439 | -0.17124 | 2.745578 | 0.012517 | 0.03687  | -3.23241 |
| CNTN2     | 0.466337 | -0.19593 | 2.74529  | 0.012525 | 0.036888 | -3.233   |
| RBFOX3    | 0.670507 | -0.13277 | 2.744364 | 0.012551 | 0.036958 | -3.23487 |
| KLHL11    | -0.39147 | 0.090505 | -2.74415 | 0.012556 | 0.036969 | -3.23531 |
| LOC440046 | -0.96116 | 0.330696 | -2.7431  | 0.012585 | 0.037049 | -3.23744 |
| MUC4      | 0.901792 | -0.66536 | 2.742966 | 0.012589 | 0.037054 | -3.23771 |
| PIGU      | -0.45209 | 0.319681 | -2.74248 | 0.012603 | 0.037089 | -3.2387  |
| RELL2     | -0.44733 | 0.563027 | -2.74202 | 0.012615 | 0.037121 | -3.23963 |
| CCDC165   | 0.429388 | -0.10558 | 2.74124  | 0.012637 | 0.037178 | -3.24121 |
| GCN1L1    | 0.558822 | -0.01811 | 2.741123 | 0.01264  | 0.037182 | -3.24144 |
| TAF1C     | -0.47667 | 0.170879 | -2.74099 | 0.012644 | 0.037188 | -3.24171 |
| RAE1      | -0.62178 | 0.401043 | -2.7405  | 0.012658 | 0.037217 | -3.24271 |
| PITX3     | 0.460814 | -0.2971  | 2.74049  | 0.012658 | 0.037217 | -3.24272 |
| EIF3K     | 0.48605  | -0.31829 | 2.739258 | 0.012692 | 0.037312 | -3.24522 |
| GLIS3-AS1 | 1.003157 | -0.36019 | 2.7159   | 0.018914 | 0.050732 | -3.24569 |
| SCGN      | 0.657264 | -0.62113 | 2.747821 | 0.013297 | 0.038748 | -3.24619 |
| SYNGR1    | 0.821008 | -0.18969 | 2.738778 | 0.012705 | 0.03734  | -3.24619 |
| STAT3     | -1.07101 | 0.962857 | -2.73868 | 0.012708 | 0.037343 | -3.2464  |
| C14orf142 | -1.20558 | 0.101598 | -2.73331 | 0.015492 | 0.043619 | -3.24698 |
| WDR45L    | -0.3815  | 0.034983 | -2.73786 | 0.012731 | 0.037399 | -3.24805 |
| ZNF252    | -0.97787 | 0.339267 | -2.73767 | 0.012736 | 0.037408 | -3.24843 |
| ASB1      | -0.49437 | 0.209565 | -2.73721 | 0.012749 | 0.03744  | -3.24936 |
| LOC100268 | 0.78702  | -0.18632 | 2.736481 | 0.012769 | 0.03749  | -3.25084 |
| NPIPL3    | -0.82337 | 0.852248 | -2.73601 | 0.012783 | 0.037521 | -3.2518  |
| ZNF780A   | -1.08781 | 0.282685 | -2.74026 | 0.013063 | 0.038208 | -3.25205 |
| BNC2      | -0.33466 | 0.256427 | -2.7358  | 0.012788 | 0.037528 | -3.25221 |
| OR7A5     | 1.08943  | -0.49892 | 2.705834 | 0.016367 | 0.045593 | -3.25262 |
| MGST1     | -1.07129 | 0.571518 | -2.73548 | 0.012798 | 0.03755  | -3.25287 |
| CPSF6     | -0.44048 | 0.365474 | -2.73534 | 0.012802 | 0.037556 | -3.25316 |
| FOXF2     | -0.37549 | -0.10767 | -2.73966 | 0.01308  | 0.038239 | -3.25326 |
| BUD13     | -0.37114 | 0.225332 | -2.73468 | 0.01282  | 0.037604 | -3.25448 |
| EVC2      | 0.7695   | -0.186   | 2.722241 | 0.013582 | 0.039396 | -3.25451 |
| FADS3     | -0.76447 | 0.660032 | -2.73434 | 0.012829 | 0.037626 | -3.25517 |
| RAB3GAP1  | -0.62841 | 0.235821 | -2.73424 | 0.012832 | 0.037629 | -3.25537 |
| HHLA1     | 0.626766 | -0.46679 | 2.751943 | 0.01426  | 0.040914 | -3.25677 |
| MTR       | 0.618988 | -0.31962 | 2.733043 | 0.012866 | 0.037717 | -3.2578  |
| CCRL1     | -0.51375 | 0.045036 | -2.73295 | 0.012869 | 0.037719 | -3.25799 |
| HMGN2     | -0.64459 | 0.56148  | -2.73213 | 0.012892 | 0.037781 | -3.25965 |
| CTU2      | 0.48358  | -0.19127 | 2.731588 | 0.012907 | 0.03782  | -3.26074 |
| PLA2G2A   | 0.561231 | -0.4302  | 2.730147 | 0.012948 | 0.037928 | -3.26366 |
| FAM83B    | 1.078974 | -0.4134  | 2.738222 | 0.013571 | 0.039384 | -3.26511 |

|           |          |          |          |          |          |          |
|-----------|----------|----------|----------|----------|----------|----------|
| YTHDF1    | -0.44253 | 0.323267 | -2.72856 | 0.012993 | 0.03805  | -3.26688 |
| RGL2      | -0.42473 | 0.462096 | -2.7284  | 0.012998 | 0.038056 | -3.26718 |
| DKFZP547L | 1.225884 | -0.90675 | 2.688192 | 0.018749 | 0.050469 | -3.26806 |
| ESPL1     | -0.78507 | 0.367762 | -2.72694 | 0.013039 | 0.038168 | -3.27013 |
| TRIM37    | -0.56828 | 0.235402 | -2.72693 | 0.01304  | 0.038168 | -3.27016 |
| ANAPC2    | -0.44251 | 0.52673  | -2.72684 | 0.013042 | 0.03817  | -3.27035 |
| GPR37L1   | 0.478197 | -0.40995 | 2.72672  | 0.013046 | 0.038174 | -3.27059 |
| TET3      | -0.85597 | 0.708364 | -2.72636 | 0.013056 | 0.038194 | -3.27131 |
| BTG4      | -0.68543 | 0.103773 | -2.72584 | 0.013071 | 0.038225 | -3.27236 |
| HN1       | -0.80737 | 0.687359 | -2.7256  | 0.013078 | 0.038239 | -3.27286 |
| PTEN      | -0.9448  | 0.606151 | -2.72547 | 0.013081 | 0.038239 | -3.27311 |
| IL37      | 0.602511 | -0.27699 | 2.724169 | 0.013119 | 0.038342 | -3.27574 |
| APC2      | 0.52227  | -0.32818 | 2.723827 | 0.013129 | 0.038365 | -3.27643 |
| PTTG1IP   | -0.63356 | 0.222497 | -2.72348 | 0.013139 | 0.038389 | -3.27714 |
| GPR34     | 0.446796 | -0.31099 | 2.723349 | 0.013142 | 0.038394 | -3.2774  |
| C17orf57  | 0.373089 | -0.07587 | 2.727268 | 0.013435 | 0.03908  | -3.27801 |
| NPFFR1    | 0.579917 | -0.37521 | 2.723033 | 0.013151 | 0.038415 | -3.27804 |
| CERS2     | -0.44348 | 0.483047 | -2.72232 | 0.013172 | 0.038469 | -3.27947 |
| C20orf132 | 0.555777 | -0.23406 | 2.721657 | 0.013191 | 0.038519 | -3.28082 |
| TRAPPC6A  | 0.729523 | -0.43437 | 2.721552 | 0.013194 | 0.038523 | -3.28103 |
| MTMR9LP   | 0.367678 | -0.37185 | 2.721268 | 0.013202 | 0.038541 | -3.2816  |
| WBSCR28   | 1.097044 | -0.4406  | 2.706718 | 0.015643 | 0.043975 | -3.28164 |
| ZAR1      | 0.525661 | -0.22965 | 2.733921 | 0.014209 | 0.040794 | -3.28247 |
| HOXC12    | -0.75404 | -0.14135 | -2.72497 | 0.013502 | 0.039217 | -3.2826  |
| NQO1      | 0.771286 | -0.1389  | 2.724672 | 0.013511 | 0.039226 | -3.28319 |
| RTN3      | -1.14806 | 0.661684 | -2.72047 | 0.013225 | 0.038602 | -3.28321 |
| SLC39A7   | -0.37211 | 0.254909 | -2.71974 | 0.013247 | 0.038653 | -3.2847  |
| ATXN7     | -1.10898 | 0.528261 | -2.71961 | 0.01325  | 0.038657 | -3.28494 |
| PPIF      | 0.649492 | -0.3877  | 2.71922  | 0.013262 | 0.038683 | -3.28574 |
| LOC254128 | -0.89984 | 0.677925 | -2.71895 | 0.013269 | 0.038696 | -3.28628 |
| TSR1      | -0.62883 | 0.64103  | -2.71886 | 0.013272 | 0.038698 | -3.28646 |
| AFG3L1P   | -0.70358 | 0.496231 | -2.71873 | 0.013276 | 0.0387   | -3.28673 |
| C12orf24  | 0.555407 | -0.20181 | 2.718662 | 0.013278 | 0.0387   | -3.28686 |
| VWF       | 1.205555 | -0.40739 | 2.718642 | 0.013278 | 0.0387   | -3.28691 |
| LOC643988 | 0.635605 | -0.15593 | 2.717801 | 0.013303 | 0.038759 | -3.2886  |
| EXOC5     | -0.79564 | 0.161909 | -2.71765 | 0.013307 | 0.038766 | -3.2889  |
| USP8      | -0.75544 | 0.1471   | -2.71749 | 0.013312 | 0.038774 | -3.28923 |
| CDH3      | 0.515425 | -0.36936 | 2.717399 | 0.013315 | 0.038776 | -3.28941 |
| GTF3C6    | -0.46394 | 0.304092 | -2.71726 | 0.013318 | 0.03878  | -3.28968 |
| TARP      | 1.123511 | -0.08864 | 2.716833 | 0.013331 | 0.038801 | -3.29056 |
| CABP1     | 0.753297 | -0.51486 | 2.717315 | 0.016797 | 0.046439 | -3.29249 |
| MFSD7     | -0.5415  | 0.33497  | -2.71528 | 0.013377 | 0.038928 | -3.2937  |
| MORN3     | 1.133109 | -0.67717 | 2.693199 | 0.015468 | 0.043566 | -3.29373 |
| ZNF444    | 0.429907 | -0.21716 | 2.714808 | 0.01339  | 0.038962 | -3.29464 |
| GGT2      | -0.62097 | 0.13511  | -2.71343 | 0.013431 | 0.039073 | -3.29741 |
| LTA4H     | -0.60489 | 0.317948 | -2.71317 | 0.013438 | 0.039084 | -3.29794 |
| C4orf7    | 1.001305 | -0.44302 | 2.697989 | 0.015924 | 0.044619 | -3.29811 |

|           |          |          |          |          |          |          |
|-----------|----------|----------|----------|----------|----------|----------|
| SLC22A8   | 0.610618 | -0.23559 | 2.712957 | 0.013445 | 0.039095 | -3.29838 |
| RNF31     | -0.39149 | 0.421443 | -2.71291 | 0.013446 | 0.039095 | -3.29847 |
| KLC4      | -0.52264 | 0.645702 | -2.71248 | 0.013459 | 0.039124 | -3.29934 |
| D4S234E   | 1.288684 | -0.74045 | 2.712437 | 0.01346  | 0.039124 | -3.29942 |
| KIF15     | -1.00517 | 0.443237 | -2.71206 | 0.013471 | 0.03915  | -3.30018 |
| C6orf48   | 1.049184 | -0.90784 | 2.711769 | 0.01348  | 0.039169 | -3.30077 |
| SRCIN1    | 0.691754 | -0.51739 | 2.682998 | 0.015258 | 0.043153 | -3.30093 |
| LOC100121 | -0.54624 | -0.06279 | -2.7114  | 0.013491 | 0.03919  | -3.30152 |
| GPATCH2   | -0.60462 | 0.171122 | -2.71094 | 0.013504 | 0.039217 | -3.30244 |
| ALK       | -0.85371 | 0.211385 | -2.7107  | 0.013511 | 0.039226 | -3.30292 |
| IL13RA2   | -0.72273 | 0.142693 | -2.70298 | 0.014626 | 0.041672 | -3.30303 |
| ZNF490    | -0.40763 | 0.030028 | -2.71002 | 0.013531 | 0.039278 | -3.30429 |
| BRIX1     | -0.79529 | 0.453909 | -2.70963 | 0.013543 | 0.039306 | -3.30509 |
| TBC1D9B   | -0.45647 | 0.470885 | -2.70857 | 0.013574 | 0.039386 | -3.30723 |
| NDUFB11   | 0.602755 | -0.35763 | 2.708479 | 0.013577 | 0.039388 | -3.3074  |
| ZNF544    | -1.15547 | 0.923266 | -2.70771 | 0.0136   | 0.039442 | -3.30895 |
| PAFAH1B2  | -0.57405 | 0.226754 | -2.70731 | 0.013612 | 0.039471 | -3.30976 |
| HOXC9     | -0.55459 | -0.27889 | -2.7112  | 0.013909 | 0.040137 | -3.31004 |
| TTC22     | 0.654709 | 0.158212 | 2.706497 | 0.013636 | 0.039535 | -3.3114  |
| C7orf60   | -1.10743 | 0.467683 | -2.706   | 0.013651 | 0.039567 | -3.3124  |
| PLAGL1    | -1.02274 | 0.706768 | -2.7057  | 0.01366  | 0.039586 | -3.31299 |
| AVPR1A    | -0.39652 | 0.178559 | -2.70464 | 0.013691 | 0.039673 | -3.31513 |
| ETF1      | -0.38205 | -0.111   | -2.70446 | 0.013697 | 0.039678 | -3.31551 |
| RPL36AL   | -0.99103 | 0.964026 | -2.70438 | 0.013699 | 0.039678 | -3.31567 |
| KCTD2     | -0.40854 | 0.301124 | -2.70415 | 0.013706 | 0.039687 | -3.31613 |
| UBN1      | 0.671202 | -0.20026 | 2.704134 | 0.013706 | 0.039687 | -3.31616 |
| ACRC      | -0.90294 | 0.905191 | -2.70241 | 0.013758 | 0.039824 | -3.31962 |
| LOC100130 | 0.507439 | -0.41335 | 2.702331 | 0.013761 | 0.039824 | -3.31979 |
| LOC440131 | -0.82075 | 0.273101 | -2.70227 | 0.013762 | 0.039824 | -3.31991 |
| CAB39L    | -1.1706  | 0.423265 | -2.70227 | 0.013762 | 0.039824 | -3.31992 |
| ZMAT5     | -0.40729 | 0.2771   | -2.70223 | 0.013764 | 0.039824 | -3.31999 |
| ITPKA     | 0.713728 | -0.11157 | 2.702012 | 0.01377  | 0.039836 | -3.32043 |
| CHCHD6    | 0.630078 | -0.38829 | 2.701697 | 0.01378  | 0.039855 | -3.32106 |
| S100A16   | 0.568252 | -0.24887 | 2.701664 | 0.013781 | 0.039855 | -3.32113 |
| CERS5     | -0.32646 | -0.08031 | -2.70114 | 0.013796 | 0.039894 | -3.32218 |
| C4orf42   | -0.58214 | 0.550015 | -2.70107 | 0.013798 | 0.039894 | -3.32232 |
| TTY20     | -1.13893 | 0.471004 | -2.70094 | 0.013802 | 0.039894 | -3.32258 |
| ACMSD     | 0.7172   | -0.23494 | 2.700941 | 0.013802 | 0.039894 | -3.32258 |
| LRRC58    | -0.83096 | 0.158492 | -2.70062 | 0.013812 | 0.039917 | -3.32324 |
| PTPRZ1    | -0.81374 | 0.0486   | -2.70016 | 0.013826 | 0.03995  | -3.32415 |
| MYCNOS    | 0.458206 | -0.32595 | 2.699864 | 0.013835 | 0.039971 | -3.32475 |
| C6orf47   | -0.42779 | 0.402896 | -2.69967 | 0.013841 | 0.039982 | -3.32515 |
| LCE2B     | 0.442393 | -0.32628 | 2.699565 | 0.013844 | 0.039985 | -3.32535 |
| PPP6C     | -0.85719 | 0.257141 | -2.69936 | 0.01385  | 0.039997 | -3.32577 |
| IGFALS    | 0.7208   | -0.30104 | 2.702159 | 0.014182 | 0.040734 | -3.32802 |
| HIST1H1T  | 0.716968 | -0.10697 | 2.698022 | 0.013891 | 0.040099 | -3.32846 |
| PIEZO1    | 0.707198 | -0.11069 | 2.697993 | 0.013892 | 0.040099 | -3.32852 |

|           |          |          |          |          |          |          |
|-----------|----------|----------|----------|----------|----------|----------|
| NSMCE2    | -1.02904 | -0.09841 | -2.69769 | 0.013901 | 0.040119 | -3.32912 |
| GPT       | 0.375496 | -0.27779 | 2.697243 | 0.013914 | 0.040147 | -3.33003 |
| LOC100285 | -0.4876  | 0.063033 | -2.70446 | 0.01458  | 0.041584 | -3.33148 |
| LOC100501 | -0.47374 | 0.232762 | -2.69651 | 0.013937 | 0.040206 | -3.33151 |
| APOLD1    | 0.763256 | -0.73441 | 2.696097 | 0.013949 | 0.040236 | -3.33233 |
| ENTPD1    | -1.43388 | 1.125532 | -2.69597 | 0.013953 | 0.040236 | -3.33259 |
| NFYA      | -0.54757 | 0.424013 | -2.69596 | 0.013953 | 0.040236 | -3.33261 |
| HDAC5     | -0.69726 | 0.87013  | -2.69578 | 0.013959 | 0.04024  | -3.33296 |
| ANKRD34B  | -1.36031 | 0.222301 | -2.69578 | 0.013959 | 0.04024  | -3.33297 |
| LOC100506 | 0.828184 | -0.63505 | 2.703629 | 0.014606 | 0.041627 | -3.33311 |
| STARD13   | -0.79138 | 0.164695 | -2.69567 | 0.013962 | 0.040243 | -3.33318 |
| C16orf5   | 0.791803 | -0.03051 | 2.695487 | 0.013968 | 0.040248 | -3.33356 |
| KIF14     | 0.679964 | -0.15569 | 2.695481 | 0.013968 | 0.040248 | -3.33357 |
| CA5A      | -0.7349  | 0.58132  | -2.69528 | 0.013974 | 0.04026  | -3.33398 |
| FAM103A1  | -0.46953 | 0.142607 | -2.69513 | 0.013979 | 0.040267 | -3.33428 |
| C2orf49   | -0.85214 | 0.122074 | -2.695   | 0.013983 | 0.040273 | -3.33453 |
| NPTX1     | 1.285701 | -0.79668 | 2.697865 | 0.014314 | 0.041028 | -3.33655 |
| LOC100133 | -0.70385 | 0.235227 | -2.69773 | 0.014318 | 0.041035 | -3.33682 |
| SESN3     | 0.87575  | -0.26949 | 2.693792 | 0.01402  | 0.040373 | -3.33697 |
| EXD1      | 0.532056 | -0.54498 | 2.701659 | 0.014667 | 0.041771 | -3.33698 |
| RPL13P5   | -0.59283 | 0.140991 | -2.69365 | 0.014024 | 0.04038  | -3.33726 |
| MTL5      | -0.9438  | 0.436161 | -2.69252 | 0.014058 | 0.04047  | -3.33952 |
| CCDC22    | -0.40257 | 0.291155 | -2.69249 | 0.014059 | 0.04047  | -3.33957 |
| VKORC1L1  | -1.20471 | 0.740557 | -2.69233 | 0.014064 | 0.040472 | -3.3399  |
| IL17A     | 0.551436 | -0.43779 | 2.692332 | 0.014064 | 0.040472 | -3.3399  |
| FAHD1     | 0.505481 | -0.32512 | 2.692154 | 0.01407  | 0.040482 | -3.34026 |
| C16orf54  | -0.77164 | 0.797829 | -2.69175 | 0.014082 | 0.040512 | -3.34108 |
| PPP1R15A  | -0.43806 | 0.699862 | -2.69163 | 0.014086 | 0.040515 | -3.34132 |
| LOC439945 | 1.260705 | -0.8455  | 2.69158  | 0.014087 | 0.040515 | -3.34141 |
| METTL2A   | 0.499883 | -0.14642 | 2.695035 | 0.014402 | 0.041237 | -3.34217 |
| CEL       | -0.77725 | 0.553635 | -2.69111 | 0.014102 | 0.040545 | -3.34235 |
| KIAA0922  | -0.98405 | 0.811378 | -2.69076 | 0.014113 | 0.04057  | -3.34307 |
| KRTAP4-9  | -0.64954 | 0.122846 | -2.69449 | 0.014418 | 0.041261 | -3.34325 |
| GTPBP6    | -0.75082 | 0.679442 | -2.69024 | 0.014129 | 0.040609 | -3.3441  |
| SSX8      | 0.530902 | -0.03405 | 2.697987 | 0.014781 | 0.04204  | -3.34417 |
| SP1       | -0.92391 | 0.591733 | -2.69012 | 0.014132 | 0.040615 | -3.34435 |
| KRTAP4-8  | 0.435986 | -0.56219 | 2.689672 | 0.014146 | 0.040648 | -3.34525 |
| SLC1A1    | -0.65286 | 0.114994 | -2.68957 | 0.014149 | 0.040651 | -3.34545 |
| LOC100133 | -0.52613 | 0.688481 | -2.68905 | 0.014165 | 0.040692 | -3.3465  |
| UFC1      | -0.5823  | 0.6354   | -2.688   | 0.014198 | 0.040773 | -3.34861 |
| RBPJL     | 0.468168 | -0.25437 | 2.68771  | 0.014207 | 0.040793 | -3.34919 |
| LOC100501 | -0.80801 | 0.234205 | -2.68733 | 0.014218 | 0.040814 | -3.34994 |
| ATXN3     | -1.14517 | 0.844336 | -2.68689 | 0.014232 | 0.040848 | -3.35083 |
| NCDN      | -0.59734 | 0.927809 | -2.68641 | 0.014247 | 0.040885 | -3.3518  |
| TMTC3     | -0.84485 | 0.397018 | -2.68592 | 0.014263 | 0.040917 | -3.35279 |
| PIGW      | -0.74457 | 0.156726 | -2.68561 | 0.014272 | 0.040936 | -3.3534  |
| NSUN5     | -0.40874 | 0.434472 | -2.68556 | 0.014273 | 0.040936 | -3.35349 |

|           |          |          |          |          |          |          |
|-----------|----------|----------|----------|----------|----------|----------|
| KCNJ16    | -0.89784 | 0.006092 | -2.68543 | 0.014278 | 0.040942 | -3.35376 |
| OLAH      | -2.77411 | 1.485961 | -2.68475 | 0.014299 | 0.040997 | -3.35513 |
| INPP5A    | -0.80228 | 0.551926 | -2.68458 | 0.014304 | 0.041006 | -3.35548 |
| CH25H     | -0.91589 | 0.108359 | -2.6752  | 0.015512 | 0.043663 | -3.35724 |
| ARHGAP11  | -0.94553 | 0.64188  | -2.68296 | 0.014355 | 0.041133 | -3.35872 |
| PNLIP     | -0.47749 | 0.108848 | -2.69026 | 0.015025 | 0.042624 | -3.35929 |
| DYNLRB2   | -0.84118 | 0.084773 | -2.68266 | 0.014364 | 0.041154 | -3.35932 |
| CADPS     | -0.82113 | 0.309011 | -2.68231 | 0.014375 | 0.041176 | -3.36003 |
| MAP3K3    | -0.63534 | 0.609431 | -2.68228 | 0.014376 | 0.041176 | -3.3601  |
| SNHG1     | 0.833852 | -0.71492 | 2.681768 | 0.014392 | 0.041216 | -3.36111 |
| C8orf22   | -0.51342 | -0.09254 | -2.68526 | 0.014708 | 0.041868 | -3.36157 |
| EEF1D     | -0.75008 | 0.819287 | -2.68137 | 0.014405 | 0.04124  | -3.36191 |
| SNX24     | 0.548373 | -0.04105 | 2.681295 | 0.014407 | 0.04124  | -3.36206 |
| DCP1B     | 0.666827 | -0.16619 | 2.680975 | 0.014417 | 0.041261 | -3.3627  |
| KIF20B    | -1.19023 | 0.410274 | -2.68083 | 0.014422 | 0.041264 | -3.363   |
| NARFL     | 0.372454 | -0.10896 | 2.680711 | 0.014425 | 0.041269 | -3.36323 |
| GAK       | -0.60795 | 0.649264 | -2.68046 | 0.014433 | 0.041285 | -3.36373 |
| MED23     | -0.84512 | 0.150317 | -2.68033 | 0.014437 | 0.041291 | -3.36399 |
| ZNF701    | 0.79234  | -0.39446 | 2.680131 | 0.014444 | 0.041303 | -3.3644  |
| TOR1AIP2  | -0.83719 | 0.491977 | -2.67995 | 0.014449 | 0.041313 | -3.36476 |
| UBL3      | -0.66578 | 0.071881 | -2.67961 | 0.01446  | 0.041332 | -3.36545 |
| CTNNA2    | -0.57531 | 0.249261 | -2.6796  | 0.01446  | 0.041332 | -3.36546 |
| APRT      | 0.988983 | -0.40472 | 2.678926 | 0.014482 | 0.041387 | -3.36682 |
| PHF8      | -0.79921 | 0.45094  | -2.67848 | 0.014496 | 0.041422 | -3.36771 |
| PURA      | 0.307176 | -0.00602 | 2.678201 | 0.014504 | 0.041441 | -3.36827 |
| FAM8A1    | -1.00108 | 0.590148 | -2.67799 | 0.014511 | 0.041454 | -3.3687  |
| GIMAP4    | -0.79886 | 0.87145  | -2.67769 | 0.014521 | 0.04147  | -3.36929 |
| GLOD5     | -1.15867 | 0.619937 | -2.67768 | 0.014521 | 0.04147  | -3.36932 |
| IFNA21    | -0.60016 | -0.02324 | -2.67722 | 0.014535 | 0.041498 | -3.37023 |
| ZNF451    | -0.7704  | -0.06869 | -2.67714 | 0.014538 | 0.041498 | -3.37041 |
| EPSTI1    | -1.901   | 1.407082 | -2.67713 | 0.014538 | 0.041498 | -3.37041 |
| DEDD2     | -0.50814 | 0.752935 | -2.6771  | 0.014539 | 0.041498 | -3.37048 |
| SERF2     | -0.37173 | 0.454959 | -2.67704 | 0.014541 | 0.041498 | -3.37061 |
| TANC1     | -0.42196 | -0.09097 | -2.67637 | 0.014563 | 0.041551 | -3.37195 |
| LOC64532: | -0.94514 | 0.324477 | -2.67631 | 0.014564 | 0.041551 | -3.37206 |
| COBL      | -0.59424 | 0.139396 | -2.66722 | 0.015775 | 0.044303 | -3.37276 |
| PDCD10    | -1.11506 | -0.15695 | -2.67585 | 0.014579 | 0.041584 | -3.37299 |
| COQ2      | -1.2032  | 0.432419 | -2.67574 | 0.014583 | 0.041585 | -3.37321 |
| KCNRG     | 0.647111 | -0.65144 | 2.672164 | 0.018343 | 0.049644 | -3.37424 |
| BET1      | -0.85284 | 0.250015 | -2.67519 | 0.0146   | 0.041626 | -3.3743  |
| LPAR2     | -0.86146 | 0.707146 | -2.67511 | 0.014602 | 0.041626 | -3.37446 |
| C9orf78   | 0.877982 | -0.16107 | 2.675082 | 0.014603 | 0.041626 | -3.37452 |
| CAMK1     | 1.044152 | -0.24616 | 2.674449 | 0.014623 | 0.041671 | -3.37579 |
| MGA       | 0.613244 | -0.24793 | 2.673948 | 0.014639 | 0.041705 | -3.37679 |
| PLCD4     | 0.664047 | -0.07638 | 2.677562 | 0.014953 | 0.042456 | -3.37682 |
| IFI16     | -1.04735 | 1.249325 | -2.67379 | 0.014645 | 0.041713 | -3.37712 |
| PARL      | -0.61175 | -0.32953 | -2.67214 | 0.014697 | 0.041845 | -3.38041 |

|           |          |          |          |          |          |          |
|-----------|----------|----------|----------|----------|----------|----------|
| PSPH      | -0.60135 | 0.387395 | -2.67171 | 0.014711 | 0.041872 | -3.38128 |
| RPS26     | 1.331955 | -0.84273 | 2.671494 | 0.014718 | 0.041886 | -3.38171 |
| LOC100506 | 1.02378  | -0.93749 | 2.620118 | 0.018    | 0.048966 | -3.38199 |
| ALX4      | 0.687281 | -0.21724 | 2.671105 | 0.01473  | 0.041915 | -3.38249 |
| DNAI2     | 0.989252 | -0.62353 | 2.675656 | 0.0192   | 0.051326 | -3.38262 |
| ZC3H14    | -0.37349 | 0.428914 | -2.67094 | 0.014736 | 0.041924 | -3.38283 |
| HSD17B8   | 0.752558 | -0.59568 | 2.669553 | 0.01478  | 0.04204  | -3.3856  |
| POMT2     | -0.33496 | 0.262757 | -2.66947 | 0.014783 | 0.04204  | -3.38577 |
| CALM1     | -0.42897 | 0.343628 | -2.66898 | 0.014799 | 0.042079 | -3.38674 |
| CRLF1     | 0.409781 | -0.39012 | 2.668116 | 0.014827 | 0.042152 | -3.38847 |
| TM4SF19   | 0.76536  | -0.32593 | 2.640402 | 0.019513 | 0.052027 | -3.38878 |
| WFDC13    | -0.8205  | -0.03943 | -2.66686 | 0.014867 | 0.042261 | -3.39098 |
| WRNIP1    | -0.73293 | 0.43423  | -2.66664 | 0.014874 | 0.042275 | -3.39143 |
| CASC1     | 0.739106 | -0.16188 | 2.666494 | 0.014879 | 0.042282 | -3.39172 |
| CORO1A    | -0.48404 | 0.569495 | -2.66548 | 0.014912 | 0.042369 | -3.39375 |
| NCR3      | 1.010415 | -0.63574 | 2.665421 | 0.014914 | 0.042369 | -3.39387 |
| SERPINA1  | -0.68046 | 0.437842 | -2.66523 | 0.01492  | 0.042381 | -3.39425 |
| SPACA3    | 0.474168 | -0.18065 | 2.664919 | 0.01493  | 0.042403 | -3.39487 |
| TRMT12    | -0.65989 | 0.353855 | -2.66459 | 0.014941 | 0.042427 | -3.39553 |
| LOC100507 | 0.602408 | -0.39145 | 2.663565 | 0.014974 | 0.04251  | -3.39758 |
| KIAA1797  | 0.603516 | -0.29351 | 2.662985 | 0.014993 | 0.042557 | -3.39874 |
| DERL1     | -0.37946 | 0.111138 | -2.66269 | 0.015003 | 0.042578 | -3.39933 |
| F13A1     | 1.442824 | -0.58236 | 2.66214  | 0.015021 | 0.042623 | -3.40043 |
| POTEE     | -0.8113  | 0.643149 | -2.66206 | 0.015023 | 0.042624 | -3.40058 |
| KCNF1     | -0.94819 | 0.29782  | -2.66128 | 0.015049 | 0.042685 | -3.40215 |
| HORMAD2   | 0.324    | -0.21776 | 2.667853 | 0.015754 | 0.04425  | -3.40307 |
| DNAJA4    | 0.966539 | -0.2418  | 2.660699 | 0.015068 | 0.042732 | -3.40331 |
| SOST      | -0.56462 | 0.15268  | -2.66033 | 0.01508  | 0.042755 | -3.40405 |
| PCSK1     | -0.64569 | 0.005335 | -2.66032 | 0.01508  | 0.042755 | -3.40408 |
| ZNF789    | 0.419764 | -0.15286 | 2.663491 | 0.015411 | 0.043455 | -3.40465 |
| ZNF137P   | -0.66219 | 0.172015 | -2.65543 | 0.016731 | 0.046322 | -3.40498 |
| MLN       | 0.586726 | -0.28416 | 2.659398 | 0.01511  | 0.042833 | -3.40591 |
| KLF16     | -0.4585  | 0.370793 | -2.65935 | 0.015112 | 0.042833 | -3.406   |
| PEBP4     | 0.832227 | -0.09027 | 2.645519 | 0.016016 | 0.044832 | -3.40616 |
| TUBB      | -0.8898  | 1.110083 | -2.65923 | 0.015116 | 0.042838 | -3.40625 |
| LCE2C     | 0.555263 | -0.61016 | 2.659021 | 0.015123 | 0.042846 | -3.40666 |
| MRPS18A   | -0.45691 | 0.322116 | -2.65901 | 0.015123 | 0.042846 | -3.40669 |
| WFDC3     | 0.551379 | -0.33065 | 2.658709 | 0.015133 | 0.042868 | -3.40729 |
| LZTR1     | -0.46007 | 0.19618  | -2.65814 | 0.015152 | 0.042915 | -3.40843 |
| ZMYND8    | -0.61947 | 0.4146   | -2.65806 | 0.015154 | 0.042916 | -3.40859 |
| ZPLD1     | -0.45721 | 0.091442 | -2.65775 | 0.015165 | 0.042938 | -3.4092  |
| C19orf68  | 0.525112 | -0.16342 | 2.657311 | 0.015179 | 0.042973 | -3.41008 |
| NFE2L2    | -0.81845 | 0.474076 | -2.65709 | 0.015186 | 0.042982 | -3.41052 |
| ACTC1     | -0.6618  | 0.385852 | -2.65708 | 0.015187 | 0.042982 | -3.41054 |
| C9orf11   | 0.625069 | -0.01255 | 2.660498 | 0.015511 | 0.043663 | -3.41056 |
| PC        | 0.848341 | -0.16402 | 2.656767 | 0.015197 | 0.043006 | -3.41117 |
| IL3RA     | -1.02481 | 0.087559 | -2.65668 | 0.0152   | 0.043008 | -3.41135 |



|           |          |          |          |          |          |          |
|-----------|----------|----------|----------|----------|----------|----------|
| HYDIN     | 0.490173 | -0.32769 | 2.647248 | 0.016455 | 0.045764 | -3.41155 |
| AMD1      | 0.615553 | -0.21942 | 2.655671 | 0.015233 | 0.043096 | -3.41336 |
| POU3F2    | 1.155477 | -0.92482 | 2.635428 | 0.018089 | 0.049158 | -3.41556 |
| MDFI      | 0.401931 | -0.31512 | 2.654109 | 0.015285 | 0.043213 | -3.41648 |
| IKBKE     | -0.39692 | 0.510148 | -2.65408 | 0.015286 | 0.043213 | -3.41653 |
| POMGNT1   | 0.674445 | -0.31453 | 2.653846 | 0.015294 | 0.04323  | -3.417   |
| OR51G1    | -0.51387 | 0.154037 | -2.65378 | 0.015296 | 0.04323  | -3.41714 |
| DKK3      | -1.02339 | 0.425435 | -2.65346 | 0.015307 | 0.043249 | -3.41777 |
| NPM3      | 0.642472 | -0.44045 | 2.653442 | 0.015307 | 0.043249 | -3.41781 |
| VAPB      | -0.6506  | 0.353796 | -2.65276 | 0.01533  | 0.043307 | -3.41917 |
| XPO1      | -0.98316 | 0.612405 | -2.65235 | 0.015344 | 0.043339 | -3.41999 |
| TCTN3     | 0.565909 | -0.17095 | 2.652257 | 0.015347 | 0.043342 | -3.42017 |
| FUT6      | 0.381425 | -0.30839 | 2.652097 | 0.015352 | 0.043346 | -3.42049 |
| CCDC62    | 0.696957 | -0.23638 | 2.652017 | 0.015355 | 0.043346 | -3.42065 |
| GSDMD     | -0.62689 | 0.581323 | -2.65201 | 0.015355 | 0.043346 | -3.42067 |
| UBE2W     | -0.82301 | -0.12842 | -2.65174 | 0.015364 | 0.043365 | -3.42121 |
| GBP3      | -1.57715 | 0.900546 | -2.65162 | 0.015368 | 0.04337  | -3.42144 |
| APOF      | 0.608651 | -0.22558 | 2.651331 | 0.015378 | 0.043391 | -3.42202 |
| GOLPH3    | -0.70012 | 0.099245 | -2.65113 | 0.015384 | 0.043398 | -3.42242 |
| C14orf118 | -1.20574 | 0.46462  | -2.65113 | 0.015384 | 0.043398 | -3.42243 |
| IFNAR2    | -0.59475 | 0.354312 | -2.65446 | 0.015713 | 0.044139 | -3.42247 |
| KCNG1     | 0.712945 | -0.12695 | 2.650874 | 0.015393 | 0.043413 | -3.42294 |
| POU2F2    | -0.85302 | 1.26057  | -2.65084 | 0.015394 | 0.043413 | -3.423   |
| SP140L    | -1.37501 | 1.303112 | -2.64998 | 0.015423 | 0.043481 | -3.42471 |
| MAPKAP1   | -1.22243 | 0.974857 | -2.64944 | 0.015441 | 0.043525 | -3.42579 |
| NDC80     | -1.12866 | 0.941038 | -2.64937 | 0.015443 | 0.043525 | -3.42593 |
| COX7A2L   | -0.4758  | -0.09361 | -2.64932 | 0.015445 | 0.043525 | -3.42603 |
| ADSS      | -0.52343 | 0.077091 | -2.64891 | 0.015459 | 0.043547 | -3.42686 |
| MAP4K2    | -0.49966 | 0.768245 | -2.64889 | 0.015459 | 0.043547 | -3.42689 |
| ACAT1     | -0.77217 | 0.055927 | -2.64889 | 0.01546  | 0.043547 | -3.4269  |
| ATP2B3    | 0.562978 | -0.71894 | 2.648166 | 0.015484 | 0.043603 | -3.42834 |
| TRUB2     | 0.843995 | 0.084738 | 2.634059 | 0.016414 | 0.045684 | -3.42865 |
| FTSJD1    | -0.80506 | 0.208631 | -2.64719 | 0.015517 | 0.04367  | -3.43029 |
| ZNF576    | -0.40302 | 0.226781 | -2.64623 | 0.015549 | 0.043755 | -3.43219 |
| CCL2      | 0.997741 | -0.41769 | 2.645944 | 0.015559 | 0.043776 | -3.43277 |
| C14orf45  | 1.018471 | -0.39903 | 2.644582 | 0.015605 | 0.043899 | -3.43548 |
| TSEN34    | -0.76742 | 0.463958 | -2.64447 | 0.015608 | 0.043904 | -3.43571 |
| CFD       | 1.343226 | -0.63831 | 2.64421  | 0.015617 | 0.043919 | -3.43623 |
| RPL18     | 0.94167  | -0.4886  | 2.644179 | 0.015618 | 0.043919 | -3.43629 |
| LINC00189 | 0.970301 | -0.32816 | 2.612888 | 0.017688 | 0.048333 | -3.43636 |
| C6orf211  | -0.89206 | -0.11934 | -2.64388 | 0.015629 | 0.043941 | -3.43689 |
| ABCB8     | -0.40649 | 0.42018  | -2.64286 | 0.015663 | 0.044026 | -3.43892 |
| IRS4      | 0.801194 | -0.47386 | 2.646097 | 0.015997 | 0.044802 | -3.43896 |
| MYNN      | -0.73202 | 0.023228 | -2.6424  | 0.015679 | 0.044063 | -3.43984 |
| SDCCAG8   | -0.97885 | 0.839135 | -2.6422  | 0.015685 | 0.044074 | -3.44022 |
| LYPD5     | -0.96746 | 0.536165 | -2.64216 | 0.015687 | 0.044074 | -3.44031 |
| RHOA      | -0.78271 | 0.491805 | -2.63939 | 0.015781 | 0.044314 | -3.44583 |

|           |          |          |          |          |          |          |
|-----------|----------|----------|----------|----------|----------|----------|
| ADRBK2    | -0.62651 | 0.518295 | -2.63852 | 0.015811 | 0.044391 | -3.44757 |
| SPICE1    | -0.49763 | 0.195109 | -2.63833 | 0.015818 | 0.044403 | -3.44793 |
| LINC00161 | 0.596694 | -0.2114  | 2.638147 | 0.015824 | 0.044414 | -3.44831 |
| FAM122C   | -1.21148 | 0.443253 | -2.64134 | 0.01616  | 0.045138 | -3.44833 |
| ZNF345    | 0.519102 | -0.16012 | 2.641127 | 0.016168 | 0.045152 | -3.44875 |
| SFT2D1    | -0.66058 | -0.04161 | -2.6376  | 0.015843 | 0.044457 | -3.44939 |
| AKD1      | -1.21893 | 0.588918 | -2.63757 | 0.015844 | 0.044457 | -3.44945 |
| COPS4     | -0.74322 | 0.067121 | -2.63721 | 0.015856 | 0.044486 | -3.45018 |
| FOXA1     | 0.614005 | -0.06091 | 2.637105 | 0.01586  | 0.044489 | -3.45038 |
| HSF5      | -0.86986 | 0.280073 | -2.63696 | 0.015865 | 0.044497 | -3.45066 |
| CPNE2     | -0.60841 | 0.627011 | -2.63635 | 0.015886 | 0.044543 | -3.45189 |
| NAB1      | -1.00041 | 0.780964 | -2.6362  | 0.015891 | 0.044551 | -3.45218 |
| IGSF3     | 0.378172 | -0.05768 | 2.635677 | 0.015909 | 0.044589 | -3.45322 |
| HUS1B     | -0.45186 | 0.167775 | -2.6354  | 0.015919 | 0.04461  | -3.45378 |
| FAM36A    | -0.38193 | 0.086713 | -2.63453 | 0.015949 | 0.044681 | -3.45551 |
| USP32     | -0.927   | 0.274619 | -2.63421 | 0.01596  | 0.044706 | -3.45614 |
| ZBTB26    | -1.0778  | 0.49454  | -2.63306 | 0.016    | 0.044804 | -3.45843 |
| CHFR      | -0.97709 | 0.716966 | -2.63296 | 0.016003 | 0.044808 | -3.45863 |
| AKR7L     | 0.537567 | -0.11931 | 2.632618 | 0.016015 | 0.044832 | -3.45931 |
| RPS28     | 0.93556  | -0.53739 | 2.632359 | 0.016024 | 0.044847 | -3.45983 |
| LETMD1    | 0.498532 | -0.46461 | 2.631823 | 0.016043 | 0.044886 | -3.46089 |
| RABAC1    | -0.47646 | 0.348692 | -2.63175 | 0.016045 | 0.044887 | -3.46103 |
| SORBS1    | 0.449377 | -0.23416 | 2.631682 | 0.016047 | 0.044887 | -3.46117 |
| ANKRD37   | -1.10849 | 0.571504 | -2.63155 | 0.016052 | 0.044893 | -3.46144 |
| GTF2IRD2  | -0.44665 | 0.065579 | -2.63149 | 0.016054 | 0.044893 | -3.46156 |
| ETNK2     | -1.21027 | 0.43847  | -2.61723 | 0.017015 | 0.046883 | -3.4616  |
| SYNDIG1   | -0.6297  | 0.164212 | -2.63457 | 0.016396 | 0.04566  | -3.46165 |
| SMA4      | -0.71898 | 0.565113 | -2.63138 | 0.016058 | 0.044897 | -3.46177 |
| TCEB3     | -0.46004 | 0.494926 | -2.63088 | 0.016075 | 0.04494  | -3.46277 |
| XRCC6     | 0.607145 | -0.22223 | 2.629897 | 0.01611  | 0.045022 | -3.46472 |
| OPRK1     | 0.431341 | -0.08627 | 2.629286 | 0.016131 | 0.045076 | -3.46594 |
| PISD      | -0.81156 | 0.607721 | -2.62874 | 0.01615  | 0.045123 | -3.46702 |
| WWC2      | 0.523121 | -0.11083 | 2.61814  | 0.017494 | 0.047939 | -3.46785 |
| H1FOO     | -0.56368 | 0.187331 | -2.6274  | 0.016197 | 0.045228 | -3.46968 |
| USP53     | 0.674728 | -0.63661 | 2.627037 | 0.01621  | 0.045257 | -3.47041 |
| GULP1     | 1.315973 | -0.82277 | 2.571219 | 0.023396 | 0.059714 | -3.47067 |
| TOPBP1    | -1.96691 | 0.565342 | -2.6249  | 0.01848  | 0.049909 | -3.4718  |
| PRKG1     | -0.34075 | 0.053106 | -2.62628 | 0.016236 | 0.045322 | -3.47191 |
| ASZ1      | 0.559703 | -0.22589 | 2.62624  | 0.016238 | 0.045322 | -3.47199 |
| HIPK4     | 0.760328 | -0.35491 | 2.626068 | 0.016244 | 0.045327 | -3.47233 |
| DNAL1     | 0.720953 | -0.20547 | 2.626061 | 0.016244 | 0.045327 | -3.47235 |
| ANKRD46   | 0.612338 | -0.12229 | 2.625592 | 0.016261 | 0.045367 | -3.47328 |
| RNF181    | -0.3734  | 0.232046 | -2.62548 | 0.016265 | 0.045371 | -3.4735  |
| PRDM8     | 0.453226 | -0.18135 | 2.625368 | 0.016268 | 0.045376 | -3.47373 |
| ZBTB7A    | -0.55282 | 0.719751 | -2.62506 | 0.016279 | 0.0454   | -3.47434 |
| OSBPL11   | -0.98462 | 0.692341 | -2.62495 | 0.016283 | 0.045404 | -3.47456 |
| UNKL      | -0.52667 | 0.411748 | -2.62479 | 0.016289 | 0.045413 | -3.47487 |

|           |          |          |          |          |          |          |
|-----------|----------|----------|----------|----------|----------|----------|
| EGR4      | -0.77735 | 0.475045 | -2.62771 | 0.016638 | 0.04619  | -3.47513 |
| SNORD22   | -0.37924 | 0.06591  | -2.62464 | 0.016294 | 0.045421 | -3.47516 |
| LOC10013: | -0.73606 | -0.08984 | -2.6135  | 0.017666 | 0.048303 | -3.4768  |
| EIF3J     | 0.468979 | -0.68452 | 2.623403 | 0.016338 | 0.045537 | -3.47763 |
| CRABP2    | -0.55325 | 0.504366 | -2.62313 | 0.016348 | 0.045558 | -3.47818 |
| LOC20218: | -0.66651 | 0.459401 | -2.62268 | 0.016363 | 0.045589 | -3.47906 |
| ATP5L     | -0.68578 | -0.07585 | -2.62268 | 0.016364 | 0.045589 | -3.47907 |
| TGFA      | -1.80391 | 1.345667 | -2.62214 | 0.016383 | 0.045629 | -3.48013 |
| SUCLA2    | -0.70419 | -0.09495 | -2.60742 | 0.017374 | 0.047659 | -3.48076 |
| MMP24     | 0.494338 | -0.54344 | 2.627821 | 0.017142 | 0.047159 | -3.4809  |
| SEMA4A    | -0.79897 | 0.663687 | -2.62168 | 0.016399 | 0.045661 | -3.48105 |
| EPHB2     | 0.57501  | -0.10466 | 2.62135  | 0.016411 | 0.045684 | -3.4817  |
| HIRIP3    | 0.652918 | 0.087337 | 2.621309 | 0.016412 | 0.045684 | -3.48179 |
| CAMKK1    | -0.99043 | 0.720596 | -2.62102 | 0.016422 | 0.045693 | -3.48235 |
| SUZ12     | -0.45311 | 0.252433 | -2.62098 | 0.016424 | 0.045693 | -3.48243 |
| CCDC142   | -0.6104  | 0.490353 | -2.62097 | 0.016424 | 0.045693 | -3.48246 |
| PLA2G2D   | 0.396242 | -0.52526 | 2.620256 | 0.01645  | 0.045757 | -3.48388 |
| KIAA1468  | -0.66896 | 0.082611 | -2.61996 | 0.01646  | 0.045767 | -3.48447 |
| ARFRP1    | -0.52182 | 0.340319 | -2.61995 | 0.01646  | 0.045767 | -3.48448 |
| BMP3      | -1.07344 | 0.578938 | -2.62271 | 0.016817 | 0.046481 | -3.48494 |
| FLJ34690  | 1.058912 | -0.44099 | 2.55161  | 0.02318  | 0.059314 | -3.48737 |
| A2M       | 0.495061 | -0.25242 | 2.617733 | 0.01654  | 0.045975 | -3.48888 |
| MED25     | -0.78314 | 1.249048 | -2.61688 | 0.01657  | 0.046054 | -3.49058 |
| TFCP2L1   | 0.587882 | -0.42956 | 2.616761 | 0.016574 | 0.046059 | -3.49081 |
| RAB14     | -0.56782 | 0.483238 | -2.61637 | 0.016588 | 0.046091 | -3.49159 |
| GP9       | 0.750951 | -0.19012 | 2.615811 | 0.016609 | 0.046134 | -3.4927  |
| LMO2      | -0.74782 | 0.578119 | -2.61581 | 0.016609 | 0.046134 | -3.4927  |
| BAAT      | 0.661614 | -0.67494 | 2.62445  | 0.01784  | 0.048658 | -3.49309 |
| CD200R1   | 0.83793  | -0.24638 | 2.601036 | 0.017612 | 0.048184 | -3.49322 |
| LOC64373: | 0.938695 | -0.66433 | 2.615505 | 0.016619 | 0.046158 | -3.4933  |
| KDM4C     | -0.46285 | 0.250111 | -2.61526 | 0.016628 | 0.046175 | -3.49379 |
| CEP95     | -0.87078 | 0.712873 | -2.61511 | 0.016634 | 0.046184 | -3.49409 |
| LOC10050: | -1.09246 | 0.416619 | -2.61484 | 0.016643 | 0.046195 | -3.49461 |
| ERP29     | -0.41305 | 0.3103   | -2.61481 | 0.016645 | 0.046195 | -3.49468 |
| SLC15A2   | -0.73904 | 0.482273 | -2.61467 | 0.01665  | 0.046202 | -3.49496 |
| RBMV1B    | -0.76604 | 0.220302 | -2.6146  | 0.016652 | 0.046203 | -3.49511 |
| VGLL1     | 0.46951  | -0.20489 | 2.614314 | 0.016662 | 0.046224 | -3.49566 |
| FAM113A   | 0.42541  | -0.1343  | 2.614234 | 0.016665 | 0.046226 | -3.49582 |
| Sep-07    | -0.65961 | 0.230225 | -2.61416 | 0.016668 | 0.046227 | -3.49598 |
| KCNC3     | 0.523844 | -0.40453 | 2.614017 | 0.016673 | 0.046233 | -3.49625 |
| COG6      | -0.58971 | 0.093786 | -2.61396 | 0.016675 | 0.046233 | -3.49636 |
| TMX3      | -0.79336 | 0.257252 | -2.61678 | 0.017031 | 0.046921 | -3.49657 |
| FADS1     | 0.593964 | 0.011034 | 2.613835 | 0.01668  | 0.04624  | -3.49661 |
| SMPD1     | -0.61408 | 0.754502 | -2.61369 | 0.016685 | 0.046247 | -3.4969  |
| CYBASC3   | 0.639318 | -0.14123 | 2.613418 | 0.016695 | 0.046257 | -3.49744 |
| TP53TG1   | -0.54221 | 0.327787 | -2.6134  | 0.016695 | 0.046257 | -3.49747 |
| BRD7P3    | -0.65394 | 0.048072 | -2.61632 | 0.017048 | 0.046958 | -3.49747 |

|          |          |          |          |          |          |          |
|----------|----------|----------|----------|----------|----------|----------|
| DUSP12   | -0.46428 | 0.034526 | -2.6134  | 0.016695 | 0.046257 | -3.49748 |
| WDR25    | 0.401083 | 0.053437 | 2.613315 | 0.016698 | 0.046259 | -3.49764 |
| ATP13A4  | -0.91651 | 0.283083 | -2.61291 | 0.016713 | 0.046292 | -3.49844 |
| SLC9A3R1 | 1.209523 | -0.33085 | 2.612835 | 0.016716 | 0.046294 | -3.4986  |
| ATP1A1OS | -0.68614 | 0.501933 | -2.61254 | 0.016726 | 0.046317 | -3.49918 |
| BLOC1S2  | -0.8135  | -0.13036 | -2.61236 | 0.016733 | 0.046322 | -3.49954 |
| SOD2     | -0.80422 | 0.663488 | -2.61225 | 0.016737 | 0.046326 | -3.49976 |
| LOC38902 | -0.66522 | -0.21648 | -2.61772 | 0.01751  | 0.047969 | -3.50046 |
| SNX5     | -0.63265 | 0.477286 | -2.61165 | 0.016759 | 0.04638  | -3.50094 |
| HLCS     | 0.877548 | -0.18394 | 2.611379 | 0.016768 | 0.0464   | -3.50148 |
| TRIP6    | -0.64309 | 0.724021 | -2.61108 | 0.016779 | 0.046419 | -3.50207 |
| ATP5D    | 0.605791 | -0.25052 | 2.61101  | 0.016782 | 0.046419 | -3.50221 |
| CERK     | -1.35078 | 0.619943 | -2.611   | 0.016782 | 0.046419 | -3.50223 |
| TP73-AS1 | -0.94666 | 0.894753 | -2.61093 | 0.016785 | 0.04642  | -3.50238 |
| TTC7B    | -1.0458  | 0.875043 | -2.61064 | 0.016795 | 0.046439 | -3.50295 |
| MPP2     | 0.45108  | -0.23586 | 2.609937 | 0.016821 | 0.046483 | -3.50434 |
| GTF2H5   | -0.7459  | 0.179233 | -2.60989 | 0.016822 | 0.046483 | -3.50443 |
| MRGPRX4  | 0.551432 | -0.21907 | 2.609798 | 0.016826 | 0.046483 | -3.50461 |
| SNX22    | 0.833262 | -0.40957 | 2.609742 | 0.016828 | 0.046483 | -3.50473 |
| ACTR3BP2 | -0.71811 | 0.217773 | -2.60971 | 0.016829 | 0.046483 | -3.5048  |
| CAPN5    | 0.81531  | -0.10362 | 2.609632 | 0.016832 | 0.046484 | -3.50494 |
| PENK     | -0.92058 | 0.11251  | -2.59501 | 0.01784  | 0.048658 | -3.50496 |
| CSRP2BP  | 0.725088 | -0.4644  | 2.609171 | 0.016849 | 0.04652  | -3.50586 |
| FXR1     | -0.74205 | 0.489969 | -2.60915 | 0.01685  | 0.04652  | -3.50591 |
| RASAL2   | 0.93506  | 0.124607 | 2.609055 | 0.016853 | 0.046522 | -3.50609 |
| LOC44089 | 0.449407 | -0.28513 | 2.608993 | 0.016855 | 0.046522 | -3.50621 |
| LOC10050 | -0.6646  | 0.369559 | -2.6086  | 0.016869 | 0.046555 | -3.50698 |
| STAT2    | -0.91092 | 0.584273 | -2.6084  | 0.016877 | 0.046569 | -3.50739 |
| TMEM115  | -0.54833 | 0.582397 | -2.60822 | 0.016883 | 0.04658  | -3.50774 |
| LOC10012 | 0.490305 | -0.59585 | 2.607922 | 0.016894 | 0.046604 | -3.50833 |
| ZNF425   | -0.696   | 0.441631 | -2.60749 | 0.01691  | 0.046641 | -3.50919 |
| OSR2     | -0.70457 | -0.06006 | -2.6065  | 0.016946 | 0.046734 | -3.51115 |
| RPF2     | -0.72666 | 0.585622 | -2.60634 | 0.016952 | 0.046743 | -3.51146 |
| LOC10050 | 0.938299 | -0.7019  | 2.573411 | 0.019215 | 0.051349 | -3.51195 |
| PGM1     | -0.62021 | 0.487307 | -2.60593 | 0.016967 | 0.046778 | -3.51227 |
| ADAMTS9  | 0.483381 | -0.18467 | 2.605564 | 0.016981 | 0.046809 | -3.513   |
| LHX2     | 0.884434 | -0.80926 | 2.582978 | 0.020118 | 0.053213 | -3.51324 |
| CCDC125  | -0.87837 | 0.635151 | -2.60499 | 0.017002 | 0.046859 | -3.51414 |
| WNT1     | 0.44916  | -0.32122 | 2.604942 | 0.017003 | 0.046859 | -3.51423 |
| HBB      | 2.305138 | -2.67045 | 2.481094 | 0.02556  | 0.063785 | -3.51461 |
| CLUL1    | 0.454998 | -0.13186 | 2.606587 | 0.017405 | 0.047731 | -3.51653 |
| SLC12A5  | 0.319934 | -0.09693 | 2.6037   | 0.017049 | 0.046958 | -3.51669 |
| AGBL2    | -0.61533 | 0.296991 | -2.60334 | 0.017062 | 0.046984 | -3.5174  |
| EPS15L1  | -0.67105 | 0.66271  | -2.60331 | 0.017063 | 0.046984 | -3.51745 |
| AMMECR1  | -0.43067 | 0.114409 | -2.60314 | 0.01707  | 0.046995 | -3.5178  |
| HAUS7    | 0.322444 | -0.25423 | 2.602635 | 0.017088 | 0.04704  | -3.5188  |
| TAF4B    | -0.74347 | 0.41889  | -2.6025  | 0.017093 | 0.047047 | -3.51906 |

|           |          |          |          |          |          |          |
|-----------|----------|----------|----------|----------|----------|----------|
| KRT16P2   | -0.62367 | 0.165397 | -2.60226 | 0.017102 | 0.047065 | -3.51954 |
| C6orf130  | -0.39004 | 0.118505 | -2.60115 | 0.017143 | 0.047159 | -3.52174 |
| C13orf15  | 1.097003 | -0.19795 | 2.601134 | 0.017144 | 0.047159 | -3.52177 |
| PLEKHH1   | -0.36562 | -0.05611 | -2.60372 | 0.017512 | 0.047969 | -3.52213 |
| GPR173    | 0.5168   | -0.33893 | 2.600729 | 0.017159 | 0.047194 | -3.52257 |
| B3GAT2    | 0.573445 | -0.30018 | 2.603473 | 0.017521 | 0.047988 | -3.52262 |
| PTPRF     | 1.338485 | -0.2822  | 2.537515 | 0.029775 | 0.071788 | -3.52315 |
| TCP10L2   | 0.487075 | -0.27764 | 2.600038 | 0.017184 | 0.047258 | -3.52393 |
| KPNA4     | -0.83045 | 0.241199 | -2.59976 | 0.017195 | 0.047279 | -3.52448 |
| FAM106A   | 0.759173 | -0.49612 | 2.584642 | 0.018237 | 0.049453 | -3.52513 |
| GPD2      | -0.72473 | 0.496747 | -2.60202 | 0.017575 | 0.048097 | -3.52547 |
| GDEP      | 0.486573 | -0.46209 | 2.59932  | 0.020237 | 0.053491 | -3.52729 |
| SPATA5L1  | -1.0613  | 0.305952 | -2.59778 | 0.017268 | 0.04747  | -3.52839 |
| LOC100506 | -2.17091 | 1.673223 | -2.59772 | 0.01727  | 0.04747  | -3.52851 |
| C2orf89   | 1.46132  | -0.45113 | 2.597702 | 0.017271 | 0.04747  | -3.52855 |
| GUSBP1    | -0.66404 | 0.321021 | -2.59712 | 0.017293 | 0.047523 | -3.52969 |
| PICALM    | -1.19589 | 0.857352 | -2.597   | 0.017297 | 0.047529 | -3.52994 |
| ETNK1     | -0.80829 | 0.412844 | -2.59686 | 0.017303 | 0.047536 | -3.53022 |
| ZNF302    | -0.77146 | 0.220984 | -2.59651 | 0.017316 | 0.047566 | -3.53092 |
| C11orf2   | 0.632134 | -0.27143 | 2.59629  | 0.017324 | 0.047575 | -3.53134 |
| RAB10     | -0.64962 | 0.36688  | -2.59629 | 0.017324 | 0.047575 | -3.53135 |
| C20orf79  | -0.81326 | 0.058689 | -2.58131 | 0.018367 | 0.049687 | -3.5316  |
| PKP2      | -0.56555 | 0.082943 | -2.59565 | 0.017348 | 0.047627 | -3.5326  |
| C15orf63  | -0.4753  | 0.622173 | -2.59543 | 0.017356 | 0.047644 | -3.53305 |
| LOC100506 | 0.785197 | -1.13565 | 2.589962 | 0.022583 | 0.058168 | -3.5332  |
| OSBPL2    | -0.57064 | 0.465884 | -2.59521 | 0.017364 | 0.047652 | -3.53348 |
| C10orf35  | 0.869861 | -0.62696 | 2.595108 | 0.017368 | 0.047652 | -3.53368 |
| DEPDC1    | -0.97391 | 0.306316 | -2.5951  | 0.017369 | 0.047652 | -3.53369 |
| ZNF667    | 0.684646 | -0.30803 | 2.595083 | 0.017369 | 0.047652 | -3.53373 |
| FXD1      | 0.642569 | -0.15108 | 2.579786 | 0.018427 | 0.049828 | -3.53456 |
| PRSS12    | -0.93145 | 0.272031 | -2.58314 | 0.018827 | 0.050576 | -3.53519 |
| FAM150A   | 1.006593 | -0.50493 | 2.599652 | 0.018187 | 0.049373 | -3.53536 |
| SFXN3     | -0.68495 | 0.684566 | -2.59413 | 0.017405 | 0.047731 | -3.53562 |
| UBQLN3    | 0.572001 | -0.49026 | 2.590483 | 0.019815 | 0.052667 | -3.53613 |
| C19orf79  | -0.78645 | 0.299039 | -2.5928  | 0.017455 | 0.047861 | -3.53825 |
| LOC64379  | -0.57071 | 0.107091 | -2.59228 | 0.017474 | 0.047907 | -3.53926 |
| TXLNG     | -0.87773 | 0.321058 | -2.58098 | 0.018913 | 0.050732 | -3.53935 |
| TIGD6     | 0.719348 | -0.45647 | 2.592207 | 0.017477 | 0.047909 | -3.53941 |
| TC2N      | 0.851383 | -0.72357 | 2.591808 | 0.017492 | 0.047939 | -3.5402  |
| DLG1      | -0.81079 | 0.432322 | -2.59171 | 0.017496 | 0.047939 | -3.54038 |
| TCTEX1D1  | -1.48064 | 0.48487  | -2.59393 | 0.017881 | 0.048722 | -3.54127 |
| ERVH-3    | 0.549161 | -0.44441 | 2.590826 | 0.017529 | 0.048004 | -3.54214 |
| KDEL3     | -0.50671 | 0.295055 | -2.59032 | 0.017549 | 0.048048 | -3.54313 |
| MEGF11    | -0.38688 | 0.205058 | -2.59028 | 0.01755  | 0.048048 | -3.54322 |
| C3orf19   | -0.71641 | 0.569715 | -2.59001 | 0.01756  | 0.048069 | -3.54374 |
| THEG      | 0.530488 | -0.4956  | 2.589663 | 0.017573 | 0.048097 | -3.54443 |
| SPIN1     | -0.57    | 0.300798 | -2.57431 | 0.018642 | 0.050272 | -3.54519 |

|           |          |          |          |          |          |          |
|-----------|----------|----------|----------|----------|----------|----------|
| FBXO39    | -2.13793 | 1.123181 | -2.58887 | 0.017604 | 0.048167 | -3.546   |
| GLRA4     | 0.899387 | -0.2574  | 2.55513  | 0.019963 | 0.052944 | -3.54678 |
| BDNF      | -0.9454  | 0.250573 | -2.58827 | 0.017626 | 0.048216 | -3.54718 |
| PFKFB1    | 0.834782 | -0.46218 | 2.554284 | 0.019998 | 0.052995 | -3.54839 |
| ITGB1BP2  | 0.667882 | -0.13269 | 2.587324 | 0.017662 | 0.048303 | -3.54905 |
| CLINT1    | -0.74109 | -0.10027 | -2.58725 | 0.017665 | 0.048303 | -3.5492  |
| NCALD     | 0.401617 | -0.22766 | 2.5871   | 0.017671 | 0.048311 | -3.54949 |
| AOC4      | 0.449075 | -0.54009 | 2.587015 | 0.017674 | 0.048313 | -3.54966 |
| CD47      | -0.71811 | 0.069677 | -2.5867  | 0.017686 | 0.048333 | -3.55028 |
| CA8       | 0.524557 | -0.14995 | 2.586622 | 0.017689 | 0.048333 | -3.55043 |
| KCNAB3    | -0.85839 | 0.614748 | -2.58647 | 0.017695 | 0.048343 | -3.55074 |
| HNRNPC    | -0.4227  | 0.38925  | -2.58621 | 0.017705 | 0.048363 | -3.55125 |
| CXADRP3   | -0.5996  | 0.279996 | -2.58598 | 0.017714 | 0.048381 | -3.55171 |
| ATG13     | -0.42729 | 0.24605  | -2.5856  | 0.017728 | 0.048413 | -3.55245 |
| RBM7      | -0.80868 | 0.184599 | -2.58762 | 0.018122 | 0.049235 | -3.55358 |
| MGC23284  | -0.89714 | 0.659201 | -2.58493 | 0.017754 | 0.048476 | -3.55377 |
| ZNF202    | 0.665653 | -0.54041 | 2.58481  | 0.017758 | 0.048482 | -3.55401 |
| FLJ10038  | -0.58572 | 0.241977 | -2.58447 | 0.017771 | 0.048511 | -3.55467 |
| RHCE      | 1.163861 | -0.24373 | 2.522293 | 0.025656 | 0.063934 | -3.55468 |
| TEX264    | -0.41395 | 0.456911 | -2.58425 | 0.01778  | 0.048528 | -3.55512 |
| GCA       | -1.38228 | 0.088512 | -2.58384 | 0.017796 | 0.048564 | -3.55593 |
| LOC650226 | 0.532514 | -0.16549 | 2.583237 | 0.017819 | 0.04862  | -3.55711 |
| RBM15B    | 0.423149 | -0.10005 | 2.582954 | 0.017829 | 0.048643 | -3.55767 |
| DDB2      | 0.470415 | -0.37789 | 2.582498 | 0.017847 | 0.04867  | -3.55857 |
| VAMP5     | -0.75994 | 0.332788 | -2.58234 | 0.017853 | 0.04868  | -3.55888 |
| LUZP4     | -0.75292 | 0.010818 | -2.58225 | 0.017856 | 0.048682 | -3.55905 |
| TP53RK    | -0.43904 | 0.364277 | -2.58186 | 0.017871 | 0.04871  | -3.55982 |
| LOC100130 | -0.63847 | 0.459635 | -2.58182 | 0.017873 | 0.04871  | -3.5599  |
| ZFHX3     | 0.838561 | -0.26757 | 2.581794 | 0.017874 | 0.04871  | -3.55995 |
| INTS8     | -0.86301 | 0.403985 | -2.58105 | 0.017903 | 0.048775 | -3.56142 |
| RIN1      | 0.717152 | -0.17939 | 2.580767 | 0.017914 | 0.048793 | -3.56198 |
| GSTTP1    | 0.82213  | -0.33673 | 2.580745 | 0.017915 | 0.048793 | -3.56202 |
| TCEB1     | -0.48427 | -0.06002 | -2.58035 | 0.01793  | 0.048828 | -3.56281 |
| KLHL1     | -0.53781 | 0.125902 | -2.57998 | 0.017944 | 0.04886  | -3.56354 |
| DGKH      | 0.871994 | -0.11673 | 2.579912 | 0.017947 | 0.04886  | -3.56366 |
| LOC57399  | 0.324459 | -0.09515 | 2.582332 | 0.018327 | 0.049619 | -3.56389 |
| YARS      | -0.67356 | 0.845314 | -2.57977 | 0.017952 | 0.048868 | -3.56394 |
| SP110     | -0.75347 | 0.6397   | -2.5796  | 0.017959 | 0.048879 | -3.56428 |
| TOMM40    | -0.65819 | 0.643649 | -2.57943 | 0.017965 | 0.048888 | -3.56462 |
| DYRK3     | 0.993513 | -0.32691 | 2.579394 | 0.017967 | 0.048888 | -3.56468 |
| GLB1L3    | 0.826445 | -0.20938 | 2.571274 | 0.019908 | 0.05285  | -3.56492 |
| IGLON5    | 0.438153 | -0.3526  | 2.57883  | 0.017989 | 0.04894  | -3.5658  |
| DLX6      | 0.550446 | -0.13258 | 2.577743 | 0.018031 | 0.049041 | -3.56794 |
| SEPX1     | -0.716   | 0.424568 | -2.57761 | 0.018036 | 0.049049 | -3.5682  |
| IFI27     | 2.753509 | -1.48991 | 2.57711  | 0.018055 | 0.049095 | -3.56918 |
| HAS2      | -0.55219 | 0.070144 | -2.57946 | 0.018439 | 0.049856 | -3.56948 |
| PTS       | -0.79785 | 0.031102 | -2.57668 | 0.018072 | 0.049134 | -3.57004 |

|           |          |          |          |          |          |          |
|-----------|----------|----------|----------|----------|----------|----------|
| CSH1      | -0.72151 | 0.568399 | -2.57659 | 0.018076 | 0.049136 | -3.57021 |
| EBF1      | -0.94423 | 1.281201 | -2.57651 | 0.018079 | 0.049138 | -3.57037 |
| FLJ31306  | -0.68166 | 0.639627 | -2.57548 | 0.018119 | 0.049233 | -3.5724  |
| GLTPD1    | -0.4697  | 0.539325 | -2.57533 | 0.018124 | 0.049235 | -3.57268 |
| CRB2      | 0.522702 | -0.10298 | 2.575272 | 0.018127 | 0.049235 | -3.5728  |
| CARD8     | -0.95142 | 0.717739 | -2.5748  | 0.018145 | 0.049274 | -3.57373 |
| LOC100128 | 0.606612 | -0.39851 | 2.574775 | 0.018146 | 0.049274 | -3.57378 |
| AFG3L2    | -0.60363 | 0.330093 | -2.57371 | 0.018188 | 0.049373 | -3.57588 |
| LOC100130 | -0.66088 | 0.141519 | -2.57364 | 0.018191 | 0.049374 | -3.57601 |
| BCAS2     | 0.563159 | -0.54871 | 2.573488 | 0.018197 | 0.049383 | -3.57631 |
| PCDH1     | 0.646227 | -0.25345 | 2.573409 | 0.0182   | 0.049384 | -3.57647 |
| CNTLN     | -0.94882 | 0.416445 | -2.57332 | 0.018203 | 0.049387 | -3.57664 |
| TRIM14    | -0.91318 | 0.879934 | -2.57315 | 0.01821  | 0.049399 | -3.57699 |
| NUP62     | 0.447863 | -0.25377 | 2.572762 | 0.018225 | 0.049433 | -3.57774 |
| SH2D1B    | 1.161894 | -0.47418 | 2.572641 | 0.01823  | 0.049439 | -3.57798 |
| CDC42BPA  | 0.929106 | -0.4673  | 2.57202  | 0.018254 | 0.049491 | -3.5792  |
| ERMP1     | 0.542965 | -0.41756 | 2.571754 | 0.018265 | 0.049513 | -3.57972 |
| ACSBG1    | 1.233151 | -0.14797 | 2.571499 | 0.018275 | 0.04953  | -3.58023 |
| C1orf88   | 0.558706 | -0.27101 | 2.571449 | 0.018277 | 0.04953  | -3.58032 |
| RFESD     | 0.683295 | -0.3353  | 2.571399 | 0.018279 | 0.04953  | -3.58042 |
| MYO3A     | -0.79392 | 0.289289 | -2.57121 | 0.018286 | 0.049543 | -3.58079 |
| ANKRD49   | -0.87948 | -0.17164 | -2.57112 | 0.018289 | 0.049545 | -3.58096 |
| VGLL4     | -0.71856 | 0.722387 | -2.571   | 0.018294 | 0.049552 | -3.5812  |
| YRDC      | -0.3915  | 0.002235 | -2.57041 | 0.018318 | 0.049609 | -3.58238 |
| RNF112    | -0.68193 | 0.917322 | -2.57032 | 0.018321 | 0.04961  | -3.58254 |
| LOC388155 | -0.58027 | 0.306467 | -2.57011 | 0.018329 | 0.049619 | -3.58295 |
| PAWR      | -0.70861 | 0.630499 | -2.57004 | 0.018332 | 0.04962  | -3.5831  |
| CA2       | 0.976019 | -0.78216 | 2.569433 | 0.018356 | 0.049671 | -3.58429 |
| LARP1B    | -0.88806 | 0.309605 | -2.56921 | 0.018365 | 0.049687 | -3.58473 |
| OR8H1     | -0.56844 | 0.126371 | -2.57147 | 0.018755 | 0.050478 | -3.58502 |
| RBMV2EP   | 0.634108 | -0.24718 | 2.560585 | 0.020351 | 0.053762 | -3.58509 |
| LRP1      | 1.107707 | -0.16062 | 2.568657 | 0.018387 | 0.049734 | -3.58582 |
| DAZ2      | 0.571795 | -0.39248 | 2.570683 | 0.018786 | 0.050522 | -3.58656 |
| ZNF808    | 0.533676 | -0.25962 | 2.56816  | 0.018406 | 0.04978  | -3.58679 |
| LOC100506 | -0.77759 | 0.355114 | -2.57006 | 0.018811 | 0.050553 | -3.58776 |
| CCDC66    | 0.458782 | -0.10195 | 2.572166 | 0.019265 | 0.051455 | -3.58826 |
| CNBP      | -0.62651 | 0.288228 | -2.56709 | 0.018449 | 0.049874 | -3.5889  |
| CENPH     | -0.99627 | 0.460195 | -2.56919 | 0.018846 | 0.050613 | -3.58946 |
| SEMA4B    | 0.575334 | -0.02894 | 2.566664 | 0.018466 | 0.049903 | -3.58973 |
| SFTP8     | 0.450396 | -0.52662 | 2.566642 | 0.018467 | 0.049903 | -3.58977 |
| KDM2A     | -0.59969 | 0.530307 | -2.5666  | 0.018468 | 0.049903 | -3.58987 |
| SNX29     | -0.58882 | 0.822367 | -2.56645 | 0.018474 | 0.049903 | -3.59015 |
| LRWD1     | -0.41644 | 0.581267 | -2.56644 | 0.018474 | 0.049903 | -3.59016 |
| COL9A1    | 0.590467 | -0.46174 | 2.566431 | 0.018475 | 0.049903 | -3.59019 |
| HIST1H2AJ | -0.91901 | 0.783917 | -2.56625 | 0.018482 | 0.049909 | -3.59054 |
| GP8R      | -1.51287 | 0.792754 | -2.56578 | 0.018501 | 0.049952 | -3.59146 |
| MYO1F     | -0.91409 | 0.770715 | -2.56526 | 0.018522 | 0.050002 | -3.5925  |

|           |          |          |          |          |          |          |
|-----------|----------|----------|----------|----------|----------|----------|
| ZNF33A    | -0.49661 | 0.417176 | -2.56429 | 0.01856  | 0.050099 | -3.59439 |
| PAX5      | -0.3431  | 0.029928 | -2.5641  | 0.018568 | 0.050113 | -3.59478 |
| KCNV1     | -0.50962 | 0.179642 | -2.56609 | 0.01897  | 0.050835 | -3.59548 |
| NYNRIN    | 0.429801 | -0.30354 | 2.565986 | 0.018975 | 0.050839 | -3.59569 |
| AXIN1     | -0.55267 | 0.620218 | -2.56363 | 0.018586 | 0.050156 | -3.59569 |
| PMVK      | 0.526318 | -0.12254 | 2.563137 | 0.018606 | 0.050203 | -3.59666 |
| FAM169A   | 1.115123 | -0.99428 | 2.554216 | 0.020619 | 0.054302 | -3.59708 |
| NEK1      | -0.54841 | 0.236019 | -2.56285 | 0.018618 | 0.050226 | -3.59722 |
| C22orf25  | -0.69168 | 0.895979 | -2.56272 | 0.018623 | 0.05023  | -3.59748 |
| LONRF1    | -1.37745 | 0.559643 | -2.56269 | 0.018624 | 0.05023  | -3.59753 |
| CST6      | 1.319528 | -0.29466 | 2.510176 | 0.023299 | 0.059543 | -3.59762 |
| TOR1B     | -1.04705 | 0.806656 | -2.56167 | 0.018665 | 0.050326 | -3.59954 |
| KIF18B    | 0.407466 | -0.06803 | 2.561237 | 0.018682 | 0.050366 | -3.60039 |
| Sep-15    | -0.61974 | -0.18483 | -2.56115 | 0.018686 | 0.050369 | -3.60056 |
| DBP       | 0.775828 | 0.050369 | 2.56095  | 0.018694 | 0.050384 | -3.60096 |
| C10orf54  | -0.548   | 0.401948 | -2.56052 | 0.018711 | 0.050408 | -3.60179 |
| FMO3      | -0.69521 | 0.1575   | -2.5605  | 0.018712 | 0.050408 | -3.60184 |
| FAM21A    | -0.51749 | 0.299075 | -2.5605  | 0.018712 | 0.050408 | -3.60184 |
| FKBPL     | -0.45612 | 0.351594 | -2.56043 | 0.018715 | 0.050408 | -3.60199 |
| ZNF587    | -0.46025 | 0.369578 | -2.56041 | 0.018716 | 0.050408 | -3.60202 |
| ZNF792    | 0.521263 | -0.32327 | 2.559895 | 0.018736 | 0.050449 | -3.60303 |
| CTSD      | -0.75878 | 0.733398 | -2.55985 | 0.018738 | 0.050449 | -3.60312 |
| CILP2     | 0.357795 | -0.27483 | 2.559833 | 0.018739 | 0.050449 | -3.60315 |
| BTBD8     | 0.360588 | -0.09807 | 2.561961 | 0.019137 | 0.051198 | -3.6035  |
| GMCL1     | -0.72663 | 0.420268 | -2.55909 | 0.018769 | 0.050504 | -3.60461 |
| EMR4P     | -0.68229 | 0.02061  | -2.55896 | 0.018774 | 0.050504 | -3.60486 |
| CDA       | -0.85335 | 0.752268 | -2.55895 | 0.018774 | 0.050504 | -3.60489 |
| LOC100128 | 0.604018 | -0.28875 | 2.558938 | 0.018775 | 0.050504 | -3.60491 |
| LOC284933 | 0.450456 | -0.35557 | 2.558881 | 0.018777 | 0.050504 | -3.60502 |
| PAM16     | -0.32064 | 0.131892 | -2.5585  | 0.018792 | 0.050531 | -3.60576 |
| SPINLW1-V | -0.59696 | 0.033896 | -2.55837 | 0.018798 | 0.050538 | -3.60602 |
| IP6K1     | 0.439497 | -0.00312 | 2.55827  | 0.018802 | 0.050542 | -3.60622 |
| SLMAP     | -0.97559 | 0.807684 | -2.55817 | 0.018806 | 0.050546 | -3.60641 |
| S1PR2     | 0.500055 | -0.41512 | 2.557709 | 0.018825 | 0.050576 | -3.60732 |
| NHP2L1    | 0.588772 | -0.24959 | 2.557692 | 0.018825 | 0.050576 | -3.60735 |
| DIO3OS    | 0.962051 | -0.5561  | 2.548532 | 0.020861 | 0.054734 | -3.60778 |
| KLRD1     | 1.125348 | -0.25575 | 2.527191 | 0.021794 | 0.056561 | -3.60788 |
| LOC399815 | -0.91351 | -0.03648 | -2.5451  | 0.020385 | 0.053831 | -3.60795 |
| MS4A15    | 0.452301 | -0.23838 | 2.557295 | 0.018841 | 0.050607 | -3.60813 |
| RSU1      | -0.43336 | 0.166079 | -2.55699 | 0.018854 | 0.050626 | -3.60873 |
| MBOAT4    | -0.71156 | 0.262719 | -2.55659 | 0.01887  | 0.050663 | -3.60952 |
| OCIAD1    | -0.53394 | -0.0548  | -2.55604 | 0.018892 | 0.050715 | -3.61058 |
| DGCR2     | -0.72993 | 0.630361 | -2.55585 | 0.0189   | 0.050724 | -3.61097 |
| SMAD1     | -0.82644 | 0.411724 | -2.55579 | 0.018902 | 0.050724 | -3.61108 |
| DQX1      | -0.69564 | 0.444808 | -2.55572 | 0.018905 | 0.050724 | -3.61121 |
| SRRT      | -0.45217 | 0.623051 | -2.5557  | 0.018906 | 0.050724 | -3.61125 |
| COMMD5    | -0.30958 | 0.161707 | -2.55526 | 0.018924 | 0.050752 | -3.61212 |



|           |          |          |          |          |          |          |
|-----------|----------|----------|----------|----------|----------|----------|
| IGHA1     | -0.90248 | 1.568715 | -2.55512 | 0.018929 | 0.05076  | -3.61239 |
| LNPEP     | -0.7672  | 0.313889 | -2.5546  | 0.018951 | 0.050809 | -3.61342 |
| HCLS1     | -0.4631  | 0.332997 | -2.55454 | 0.018953 | 0.050809 | -3.61352 |
| ACTL9     | 0.41009  | -0.10476 | 2.554398 | 0.018959 | 0.050818 | -3.61381 |
| DDX24     | 0.919948 | -0.39778 | 2.554142 | 0.018969 | 0.050835 | -3.61431 |
| TM4SF18   | 1.119084 | -0.76881 | 2.555937 | 0.019383 | 0.051729 | -3.61519 |
| CYP8B1    | 1.813198 | -0.63781 | 2.470555 | 0.026095 | 0.064787 | -3.616   |
| KRTAP4-2  | -0.54448 | 0.19511  | -2.55306 | 0.019013 | 0.050929 | -3.61643 |
| GSDMC     | 0.55123  | -0.24579 | 2.553061 | 0.019013 | 0.050929 | -3.61643 |
| LPP       | -0.70607 | 0.495415 | -2.55281 | 0.019024 | 0.05095  | -3.61693 |
| RCC2      | 0.607844 | -0.14225 | 2.552644 | 0.01903  | 0.050961 | -3.61725 |
| SHISA2    | -0.41366 | 0.118833 | -2.55257 | 0.019033 | 0.050962 | -3.61739 |
| FAM58A    | -0.54747 | 0.145685 | -2.55237 | 0.019042 | 0.050977 | -3.61779 |
| LY75      | 1.103689 | -0.75714 | 2.539117 | 0.020641 | 0.054331 | -3.61935 |
| SLC31A2   | -1.04092 | 0.482526 | -2.55142 | 0.01908  | 0.051074 | -3.61965 |
| WSCD2     | 0.780821 | -0.30233 | 2.551274 | 0.019086 | 0.051083 | -3.61994 |
| MLL4      | -0.55085 | 0.721096 | -2.55119 | 0.01909  | 0.051086 | -3.62011 |
| TRIM16L   | -0.34906 | 0.188345 | -2.55086 | 0.019103 | 0.051115 | -3.62075 |
| GLIS2     | 0.418093 | -0.24032 | 2.548801 | 0.019188 | 0.051326 | -3.62478 |
| SLC29A4   | 0.347684 | -0.38874 | 2.548602 | 0.019196 | 0.051326 | -3.62517 |
| CDKN2C    | -0.54213 | -0.04187 | -2.54859 | 0.019197 | 0.051326 | -3.6252  |
| PPBP      | 0.984302 | -0.67026 | 2.548502 | 0.0192   | 0.051326 | -3.62537 |
| SEC24C    | -0.72417 | 0.590669 | -2.54849 | 0.019201 | 0.051326 | -3.62539 |
| PDE3B     | -0.56483 | 0.173702 | -2.54823 | 0.019212 | 0.051348 | -3.62591 |
| SOX9      | 0.566548 | -0.29202 | 2.547797 | 0.019229 | 0.051376 | -3.62675 |
| NEBL      | 0.939419 | -0.25662 | 2.547782 | 0.01923  | 0.051376 | -3.62678 |
| FAM134A   | -0.59522 | 0.406737 | -2.54763 | 0.019236 | 0.051386 | -3.62708 |
| TBC1D3B   | 0.837811 | -0.1018  | 2.548297 | 0.019699 | 0.052415 | -3.62999 |
| SPACA5    | -0.7023  | 0.224019 | -2.54583 | 0.019311 | 0.051571 | -3.6306  |
| SLC7A5    | 0.439188 | -0.20196 | 2.545724 | 0.019315 | 0.051575 | -3.63081 |
| BUB1B     | -0.9575  | 0.600974 | -2.54555 | 0.019322 | 0.051587 | -3.63114 |
| COX6A1    | -0.50744 | 0.291395 | -2.54447 | 0.019367 | 0.051699 | -3.63325 |
| CHORDC1   | -0.99713 | 0.404894 | -2.54434 | 0.019372 | 0.051707 | -3.63352 |
| GNA13     | -1.28554 | 0.625776 | -2.54329 | 0.019416 | 0.051809 | -3.63556 |
| LRRC17    | 0.863504 | -0.30491 | 2.50131  | 0.025543 | 0.063759 | -3.63569 |
| IGF2BP2   | 1.098582 | -0.07842 | 2.543214 | 0.019419 | 0.051811 | -3.63572 |
| RNF13     | -0.84945 | 0.094022 | -2.54297 | 0.019429 | 0.051831 | -3.63619 |
| UPF3A     | -0.59131 | 0.432697 | -2.54279 | 0.019437 | 0.051844 | -3.63654 |
| KIAA1654  | 0.433547 | -0.201   | 2.543895 | 0.019884 | 0.052813 | -3.63851 |
| TMEM134   | 0.637684 | -0.37495 | 2.541536 | 0.019489 | 0.051977 | -3.639   |
| NFIB      | -0.647   | 0.139528 | -2.54145 | 0.019493 | 0.051979 | -3.63917 |
| LOC440300 | -0.43582 | 0.006763 | -2.54087 | 0.019517 | 0.05203  | -3.6403  |
| HDAC11    | 0.568446 | -0.46349 | 2.540589 | 0.019529 | 0.052049 | -3.64085 |
| JRKL      | -0.71743 | 0.062347 | -2.54056 | 0.01953  | 0.052049 | -3.6409  |
| LOC100129 | 1.339023 | -0.32988 | 2.480845 | 0.023959 | 0.060738 | -3.64163 |
| ZFP90     | -0.80181 | 0.305846 | -2.5393  | 0.019583 | 0.052184 | -3.64337 |
| OR4K17    | -0.42342 | 0.151495 | -2.53899 | 0.019596 | 0.052211 | -3.64397 |

|           |          |          |          |          |          |          |
|-----------|----------|----------|----------|----------|----------|----------|
| PMM1      | -0.42394 | 0.191399 | -2.53888 | 0.0196   | 0.052216 | -3.64419 |
| LPPR4     | -0.60288 | 0.182167 | -2.54282 | 0.020482 | 0.054023 | -3.64446 |
| C1R       | -0.39331 | 0.164956 | -2.53864 | 0.019611 | 0.052236 | -3.64466 |
| INMT      | -0.49114 | 0.102722 | -2.54022 | 0.020039 | 0.053045 | -3.64562 |
| C15orf40  | -0.5592  | 0.406887 | -2.53808 | 0.019634 | 0.052292 | -3.64575 |
| LOC100506 | 0.649411 | -0.4424  | 2.522195 | 0.020817 | 0.054653 | -3.64583 |
| DKFZP434H | 0.541776 | -0.41485 | 2.537717 | 0.019649 | 0.052321 | -3.64647 |
| CCDC150   | -0.8821  | 0.425725 | -2.53769 | 0.019651 | 0.052321 | -3.64652 |
| KIAA1586  | 0.616985 | -0.1735  | 2.53731  | 0.019666 | 0.052357 | -3.64726 |
| UBASH3A   | 1.262728 | -0.55482 | 2.537132 | 0.019674 | 0.05237  | -3.64761 |
| LRTOMT    | -0.44731 | 0.726961 | -2.53688 | 0.019685 | 0.052391 | -3.64811 |
| C11orf16  | 0.368705 | -0.11267 | 2.53676  | 0.01969  | 0.052397 | -3.64834 |
| VRK1      | -0.67243 | 0.082087 | -2.53647 | 0.019702 | 0.052415 | -3.64889 |
| DGKB      | 0.87753  | -0.50388 | 2.53922  | 0.020636 | 0.054331 | -3.65133 |
| DPY19L1   | -0.64495 | 0.19444  | -2.53518 | 0.019757 | 0.052554 | -3.65143 |
| DUSP1     | -1.30113 | 0.53008  | -2.53506 | 0.019761 | 0.052559 | -3.65166 |
| SLC8A3    | 0.856591 | 0.129314 | 2.535001 | 0.019764 | 0.052559 | -3.65177 |
| NBAS      | 0.496776 | -0.23697 | 2.534666 | 0.019778 | 0.05259  | -3.65243 |
| CGB       | 0.470616 | -0.22973 | 2.534427 | 0.019788 | 0.05261  | -3.65289 |
| TMEM151L  | -0.67862 | -0.00343 | -2.53425 | 0.019796 | 0.052623 | -3.65325 |
| CCDC81    | 0.836422 | -0.22354 | 2.533564 | 0.019825 | 0.052685 | -3.65458 |
| FLJ31958  | -0.6723  | 0.182179 | -2.53304 | 0.019847 | 0.052737 | -3.6556  |
| ARHGAP10  | 0.824971 | -0.19027 | 2.532757 | 0.019859 | 0.052762 | -3.65616 |
| HDGF      | 0.667261 | 0.002432 | 2.532221 | 0.019882 | 0.052813 | -3.6572  |
| GALNT5    | 0.536001 | -0.33934 | 2.522122 | 0.022021 | 0.057007 | -3.65735 |
| LOC100125 | -0.64733 | 0.249299 | -2.53205 | 0.019889 | 0.052816 | -3.65754 |
| SPG7      | -0.77123 | 0.56744  | -2.53202 | 0.01989  | 0.052816 | -3.65759 |
| SNX10     | -1.20382 | 0.411708 | -2.53188 | 0.019897 | 0.052826 | -3.65787 |
| BST2      | -0.55851 | 0.463532 | -2.53144 | 0.019915 | 0.05285  | -3.65873 |
| TAF15     | -0.76984 | 0.305572 | -2.53143 | 0.019916 | 0.05285  | -3.65874 |
| TPR       | -0.63778 | 0.47113  | -2.53141 | 0.019917 | 0.05285  | -3.65879 |
| TMEM173   | -0.5511  | 0.053009 | -2.5313  | 0.019921 | 0.052856 | -3.65901 |
| N4BP3     | 0.795698 | -0.22841 | 2.531124 | 0.019929 | 0.052866 | -3.65934 |
| PP12613   | -0.70808 | 0.213509 | -2.53108 | 0.019931 | 0.052866 | -3.65943 |
| APBA3     | -0.52831 | 0.11079  | -2.53216 | 0.020383 | 0.053831 | -3.6612  |
| FRZB      | -0.94448 | 0.462892 | -2.53014 | 0.019971 | 0.052957 | -3.66126 |
| C10orf116 | 0.58082  | -0.22657 | 2.530025 | 0.019976 | 0.052957 | -3.66149 |
| PREX1     | -0.77592 | 0.700451 | -2.53002 | 0.019976 | 0.052957 | -3.66149 |
| ZNF574    | 0.491749 | -0.04287 | 2.529961 | 0.019978 | 0.052957 | -3.66161 |
| LOC389033 | 0.404763 | -0.36025 | 2.529762 | 0.019987 | 0.052972 | -3.662   |
| LPAR5     | -0.85958 | 1.197738 | -2.52941 | 0.020002 | 0.052998 | -3.66269 |
| CKMT2     | -0.60257 | 0.186631 | -2.52927 | 0.020008 | 0.053006 | -3.66295 |
| AGAP2     | 0.620602 | -0.28811 | 2.529158 | 0.020013 | 0.053012 | -3.66318 |
| DBF4B     | -0.9838  | 0.775588 | -2.52895 | 0.020022 | 0.053029 | -3.66359 |
| IL22      | 0.920946 | -0.33177 | 2.530711 | 0.020446 | 0.053947 | -3.66399 |
| EHD1      | -0.52319 | 0.47897  | -2.52873 | 0.020031 | 0.053045 | -3.66402 |
| MFNG      | 0.690367 | -0.23705 | 2.528647 | 0.020035 | 0.053045 | -3.66418 |

|           |          |          |          |          |          |          |
|-----------|----------|----------|----------|----------|----------|----------|
| RPS6KA4   | 0.561219 | -0.04103 | 2.528559 | 0.020038 | 0.053045 | -3.66435 |
| KCNH6     | -0.56164 | -0.16219 | -2.52821 | 0.020053 | 0.053076 | -3.66503 |
| GGT5      | -1.18322 | 0.740027 | -2.52779 | 0.020071 | 0.053117 | -3.66585 |
| NXNL2     | -1.1062  | 1.237143 | -2.52741 | 0.020088 | 0.053146 | -3.66659 |
| HBP1      | -0.84437 | 0.534281 | -2.52741 | 0.020088 | 0.053146 | -3.66659 |
| LINC00152 | -0.90668 | 0.3456   | -2.5272  | 0.020097 | 0.053162 | -3.66699 |
| FAM184A   | -0.80046 | 0.330457 | -2.52586 | 0.020155 | 0.053301 | -3.66961 |
| FAM13B    | -0.74847 | 0.257974 | -2.52496 | 0.020193 | 0.053394 | -3.67137 |
| TCN2      | -1.30734 | 0.969166 | -2.52486 | 0.020198 | 0.053394 | -3.67156 |
| CHERP     | -0.50564 | 0.529917 | -2.52486 | 0.020198 | 0.053394 | -3.67156 |
| DCD       | 1.104441 | -0.86761 | 2.520448 | 0.036259 | 0.08326  | -3.67363 |
| SSX2IP    | 0.533098 | -0.02317 | 2.522848 | 0.020285 | 0.053609 | -3.67548 |
| C5        | -0.77406 | 0.451833 | -2.52274 | 0.02029  | 0.053615 | -3.6757  |
| LOC38888  | -0.41345 | -0.08432 | -2.52392 | 0.020741 | 0.05452  | -3.67707 |
| TAS1R2    | 0.468886 | -0.46879 | 2.508366 | 0.022004 | 0.056978 | -3.67773 |
| DIS3      | -1.05732 | 0.458787 | -2.52168 | 0.020335 | 0.053728 | -3.67775 |
| RPS29     | 1.516769 | -1.59119 | 2.521    | 0.020365 | 0.053792 | -3.67908 |
| LONP1     | 0.5704   | -0.19097 | 2.520273 | 0.020397 | 0.053852 | -3.6805  |
| CHCHD10   | 0.653836 | -0.10782 | 2.520228 | 0.020399 | 0.053852 | -3.68059 |
| RNASEH2A  | 0.478119 | -0.12964 | 2.520108 | 0.020404 | 0.053859 | -3.68082 |
| RNF34     | -0.87836 | 0.799391 | -2.51985 | 0.020415 | 0.053881 | -3.68133 |
| THOC1     | -0.67142 | 0.783417 | -2.51937 | 0.020436 | 0.053929 | -3.68226 |
| MFG8      | 0.364535 | 0.002457 | 2.518668 | 0.020467 | 0.053996 | -3.68363 |
| AP4E1     | -0.49072 | 0.113843 | -2.51831 | 0.020482 | 0.054023 | -3.68433 |
| UBFD1     | 0.516924 | -0.19003 | 2.51773  | 0.020508 | 0.054082 | -3.68545 |
| BMP8A     | -0.5382  | 0.204131 | -2.51756 | 0.020515 | 0.054094 | -3.68578 |
| HM13      | -0.68142 | 0.432251 | -2.51694 | 0.020543 | 0.054159 | -3.687   |
| NDUFA1    | -0.69836 | 0.510781 | -2.51683 | 0.020547 | 0.054161 | -3.68721 |
| MAPK7     | -0.34382 | 0.308726 | -2.5168  | 0.020549 | 0.054161 | -3.68727 |
| ZRANB2    | -1.18713 | 0.53313  | -2.51668 | 0.020554 | 0.054168 | -3.6875  |
| DSTYK     | -0.37866 | 0.371634 | -2.51603 | 0.020582 | 0.054235 | -3.68876 |
| ZNF37BP   | -0.73385 | 0.471141 | -2.51595 | 0.020586 | 0.054236 | -3.68891 |
| NAA35     | -0.57684 | 0.188774 | -2.51589 | 0.020588 | 0.054236 | -3.68903 |
| CIDEC     | -0.28697 | 0.223363 | -2.5158  | 0.020592 | 0.05424  | -3.68921 |
| ABCG5     | -0.55437 | 0.184765 | -2.51724 | 0.021035 | 0.055029 | -3.68996 |
| NCBP2     | -0.49344 | 0.489736 | -2.51491 | 0.020632 | 0.054328 | -3.69093 |
| PNO1      | 0.503296 | -0.3261  | 2.514751 | 0.020639 | 0.054331 | -3.69125 |
| FGF21     | 0.470143 | -0.36407 | 2.500828 | 0.022351 | 0.057679 | -3.692   |
| PSME2     | -0.69426 | 0.693396 | -2.5143  | 0.020659 | 0.05437  | -3.69213 |
| SLFN13    | 0.549943 | -0.16464 | 2.514173 | 0.020664 | 0.054372 | -3.69237 |
| FAM54A    | -1.08347 | 0.690269 | -2.51416 | 0.020665 | 0.054372 | -3.6924  |
| FASN      | 0.742457 | 0.086424 | 2.513858 | 0.020678 | 0.0544   | -3.69299 |
| LPCAT1    | -0.4493  | 0.351286 | -2.51336 | 0.0207   | 0.05445  | -3.69396 |
| SLC7A6    | -0.68916 | 0.526205 | -2.51325 | 0.020705 | 0.054455 | -3.69417 |
| TSC1      | 0.973997 | -0.70348 | 2.51303  | 0.020715 | 0.054474 | -3.6946  |
| GRIA3     | 0.734346 | -0.15024 | 2.512896 | 0.020721 | 0.054481 | -3.69486 |
| ACSM5     | -0.91471 | 0.317237 | -2.51284 | 0.020723 | 0.054481 | -3.69496 |

|           |          |          |          |          |          |          |
|-----------|----------|----------|----------|----------|----------|----------|
| ZNF799    | -1.2965  | 0.486356 | -2.51393 | 0.021183 | 0.055333 | -3.69633 |
| SYNC      | 0.467274 | -0.81666 | 2.512094 | 0.020756 | 0.054551 | -3.69642 |
| C1orf101  | -0.52896 | -0.01536 | -2.51205 | 0.020758 | 0.054551 | -3.6965  |
| CKMT1A    | -0.74066 | 0.004373 | -2.5114  | 0.020787 | 0.054615 | -3.69778 |
| ZNF22     | -0.77621 | 0.246465 | -2.51138 | 0.020788 | 0.054615 | -3.6978  |
| GDAP1     | 0.346862 | -0.07708 | 2.514652 | 0.021719 | 0.056396 | -3.69813 |
| LOC100501 | -0.56157 | 0.140183 | -2.51118 | 0.020797 | 0.054631 | -3.6982  |
| PCDHB17   | -0.91479 | 0.36459  | -2.51106 | 0.020802 | 0.054638 | -3.69843 |
| KIAA0319L | -1.35332 | 1.133213 | -2.51077 | 0.020815 | 0.054653 | -3.69899 |
| PHF10     | -0.95641 | 0.159797 | -2.51075 | 0.020816 | 0.054653 | -3.69903 |
| SLC26A9   | -0.39723 | 0.050633 | -2.51051 | 0.020827 | 0.054673 | -3.69951 |
| MC4R      | -0.70643 | 0.0935   | -2.51215 | 0.021262 | 0.055467 | -3.69974 |
| OR4C46    | -0.3468  | -0.03623 | -2.51191 | 0.021273 | 0.05548  | -3.70021 |
| PDHA2     | -0.91004 | 0.135012 | -2.51007 | 0.020846 | 0.054716 | -3.70035 |
| LAMA3     | -0.79832 | 0.184028 | -2.50997 | 0.02085  | 0.054721 | -3.70055 |
| CD70      | 0.687247 | -0.37289 | 2.509732 | 0.020861 | 0.054734 | -3.70101 |
| LOC554206 | -0.5092  | 0.231619 | -2.50966 | 0.020864 | 0.054735 | -3.70114 |
| CUL4A     | 0.400667 | -0.53897 | 2.509449 | 0.020874 | 0.054752 | -3.70156 |
| ZNF519    | -0.76111 | 0.242802 | -2.50934 | 0.020879 | 0.054758 | -3.70178 |
| AMN1      | -0.96116 | 0.287169 | -2.50875 | 0.020905 | 0.05482  | -3.70292 |
| PKN1      | -0.53106 | 0.623834 | -2.50856 | 0.020913 | 0.054835 | -3.70329 |
| SAMD9     | -1.89518 | 1.286441 | -2.50808 | 0.020935 | 0.054883 | -3.70422 |
| CLCN3     | -0.98196 | 0.3947   | -2.50778 | 0.020948 | 0.054909 | -3.7048  |
| POLRMT    | 0.52958  | -0.1195  | 2.507696 | 0.020952 | 0.054909 | -3.70497 |
| C10orf90  | -0.7785  | 0.233009 | -2.50768 | 0.020953 | 0.054909 | -3.70501 |
| POT1      | -0.704   | -0.21437 | -2.50752 | 0.02096  | 0.054914 | -3.70531 |
| KIAA0284  | 0.51889  | -0.3487  | 2.507505 | 0.020961 | 0.054914 | -3.70534 |
| NHP2      | 0.662134 | -0.42388 | 2.507303 | 0.02097  | 0.054929 | -3.70573 |
| KIAA1210  | -0.51125 | 0.126539 | -2.50725 | 0.020972 | 0.054929 | -3.70584 |
| MTA1      | -0.58498 | 0.733375 | -2.5071  | 0.020979 | 0.054932 | -3.70612 |
| NUPL2     | -0.62177 | 0.262214 | -2.5071  | 0.020979 | 0.054932 | -3.70612 |
| O3FAR1    | 0.403984 | -0.63811 | 2.506916 | 0.020987 | 0.054946 | -3.70648 |
| FMOD      | 0.593436 | -0.48088 | 2.500385 | 0.029725 | 0.071684 | -3.70689 |
| MRPS5     | -0.5226  | 0.560746 | -2.50667 | 0.020998 | 0.054968 | -3.70696 |
| IL12B     | -0.41999 | 0.16454  | -2.50647 | 0.021007 | 0.054984 | -3.70735 |
| LINC00478 | 0.86068  | -0.16249 | 2.50632  | 0.021014 | 0.05499  | -3.70764 |
| C16orf71  | -0.57506 | 0.147865 | -2.50629 | 0.021015 | 0.05499  | -3.70769 |
| ATG16L2   | -0.54625 | 0.404935 | -2.50608 | 0.021024 | 0.055008 | -3.70811 |
| PIGY      | -0.77238 | 0.148583 | -2.50556 | 0.021048 | 0.055054 | -3.70911 |
| C10orf122 | -0.55402 | -0.13349 | -2.49151 | 0.022788 | 0.058557 | -3.70961 |
| MAPRE3    | -0.69983 | 0.818073 | -2.50508 | 0.021069 | 0.055103 | -3.71006 |
| MCM10     | -1.43028 | 1.040211 | -2.50493 | 0.021076 | 0.055114 | -3.71035 |
| FAM46B    | 0.360301 | -0.20447 | 2.504835 | 0.02108  | 0.055117 | -3.71053 |
| LOC286161 | 0.609576 | -0.61199 | 2.508121 | 0.022016 | 0.057    | -3.71053 |
| TPK1      | -0.78341 | -0.17735 | -2.50454 | 0.021093 | 0.055144 | -3.71109 |
| ADH5      | -0.84844 | 0.256232 | -2.50446 | 0.021097 | 0.055146 | -3.71125 |
| RPL26L1   | -1.01624 | 0.287868 | -2.50398 | 0.021119 | 0.055196 | -3.71219 |

|          |          |          |          |          |          |          |
|----------|----------|----------|----------|----------|----------|----------|
| ACVR1    | 0.730144 | -0.20829 | 2.503885 | 0.021123 | 0.055199 | -3.71237 |
| CD24     | -1.23219 | 0.486167 | -2.50336 | 0.021147 | 0.055253 | -3.71338 |
| PZP      | 0.908759 | -0.72025 | 2.507863 | 0.022673 | 0.058332 | -3.71355 |
| TM4SF1   | 0.406361 | -0.26674 | 2.488862 | 0.022913 | 0.05881  | -3.7146  |
| USP28    | -0.6195  | 0.729351 | -2.5027  | 0.021176 | 0.055324 | -3.71467 |
| DHRS7C   | -0.62566 | 0.098511 | -2.50388 | 0.021636 | 0.056224 | -3.71564 |
| PTDSS1   | 0.470944 | -0.23473 | 2.502109 | 0.021203 | 0.055379 | -3.71582 |
| DHRS7B   | -0.51786 | 0.540745 | -2.50191 | 0.021212 | 0.055395 | -3.7162  |
| LEPREL4  | 0.51422  | -0.03528 | 2.501774 | 0.021218 | 0.055404 | -3.71647 |
| RTKN2    | -0.9629  | 0.333661 | -2.50153 | 0.021229 | 0.055425 | -3.71693 |
| ATAD1    | -0.71768 | 0.070601 | -2.50145 | 0.021233 | 0.055427 | -3.71709 |
| MLYCD    | -0.62124 | 0.5829   | -2.50133 | 0.021238 | 0.055434 | -3.71732 |
| PDCD4    | 0.638121 | -0.23858 | 2.500909 | 0.021258 | 0.055467 | -3.71815 |
| C12orf76 | -0.60044 | 0.562823 | -2.50091 | 0.021258 | 0.055467 | -3.71815 |
| C9orf64  | 0.369829 | -0.22424 | 2.500866 | 0.021259 | 0.055467 | -3.71823 |
| FPR2     | -1.13886 | 0.496393 | -2.50061 | 0.021271 | 0.05548  | -3.71873 |
| SEMA4C   | 0.806925 | -0.31932 | 2.500239 | 0.021288 | 0.055512 | -3.71945 |
| APOA5    | 0.385527 | -0.23124 | 2.498905 | 0.021349 | 0.05566  | -3.72203 |
| USP20    | 0.466122 | -0.19431 | 2.498866 | 0.02135  | 0.05566  | -3.72211 |
| SYT13    | 0.567097 | -0.63192 | 2.498414 | 0.021371 | 0.055706 | -3.72298 |
| LST1     | -0.52336 | 0.40424  | -2.49832 | 0.021375 | 0.055708 | -3.72317 |
| RTBDN    | 0.408337 | -0.39764 | 2.498272 | 0.021377 | 0.055708 | -3.72326 |
| LUC7L2   | -0.48945 | 0.462172 | -2.49784 | 0.021397 | 0.055752 | -3.72411 |
| LTV1     | -0.81925 | 0.738231 | -2.49766 | 0.021405 | 0.055766 | -3.72445 |
| C2CD4A   | 0.475985 | -0.49863 | 2.497469 | 0.021414 | 0.055781 | -3.72482 |
| FBL      | 0.91815  | -0.53091 | 2.496695 | 0.021449 | 0.055866 | -3.72632 |
| MUC22    | -0.44224 | 0.102708 | -2.49645 | 0.021461 | 0.055888 | -3.7268  |
| RFTN2    | 2.087632 | -0.96735 | 2.35658  | 0.043248 | 0.094986 | -3.7268  |
| LOC54146 | 0.416866 | -0.06222 | 2.497452 | 0.02193  | 0.056839 | -3.72797 |
| QRICH2   | 0.483618 | -0.03921 | 2.495721 | 0.021494 | 0.055967 | -3.7282  |
| CHRA1    | 0.567726 | -0.02443 | 2.495499 | 0.021504 | 0.055986 | -3.72864 |
| C17orf51 | 0.404186 | -0.09692 | 2.495426 | 0.021507 | 0.055987 | -3.72878 |
| TEK      | 0.840446 | -0.45542 | 2.483434 | 0.023832 | 0.060518 | -3.72955 |
| RNPEPL1  | -0.4977  | 0.6409   | -2.49502 | 0.021526 | 0.056028 | -3.72957 |
| KPNA5    | -0.84588 | 0.08048  | -2.49488 | 0.021532 | 0.056038 | -3.72984 |
| RDM1     | -0.80747 | 0.489813 | -2.49469 | 0.021541 | 0.056053 | -3.7302  |
| FOXG1    | 0.43147  | -0.16375 | 2.496004 | 0.021997 | 0.056973 | -3.73074 |
| BOD1     | -0.86855 | 0.802794 | -2.49432 | 0.021558 | 0.056084 | -3.73092 |
| SENP2    | -0.92367 | 0.733503 | -2.49426 | 0.021561 | 0.056084 | -3.73103 |
| SLC16A9  | 0.409981 | -0.29808 | 2.494243 | 0.021562 | 0.056084 | -3.73107 |
| COPZ1    | -0.35017 | 0.312542 | -2.49413 | 0.021567 | 0.056087 | -3.73129 |
| RMND1    | -0.68654 | 0.292471 | -2.49409 | 0.021569 | 0.056087 | -3.73137 |
| BATF2    | -1.42499 | 0.77913  | -2.49396 | 0.021575 | 0.056095 | -3.73162 |
| C17orf75 | -0.94706 | 0.478506 | -2.49341 | 0.0216   | 0.056149 | -3.73268 |
| MDC1     | 0.584227 | -0.41463 | 2.493383 | 0.021601 | 0.056149 | -3.73273 |
| RNF168   | -0.57649 | 0.103629 | -2.49321 | 0.021609 | 0.056162 | -3.73306 |
| MATR3    | -0.81601 | 0.100253 | -2.49224 | 0.021654 | 0.056264 | -3.73496 |

|          |          |          |          |          |          |          |
|----------|----------|----------|----------|----------|----------|----------|
| EIF2C2   | 0.681504 | -0.22944 | 2.492074 | 0.021661 | 0.056276 | -3.73527 |
| GLIS3    | 0.449058 | -0.12577 | 2.4918   | 0.021674 | 0.056301 | -3.7358  |
| SGK494   | -0.62439 | 0.267955 | -2.49144 | 0.021691 | 0.056338 | -3.7365  |
| UBA7     | -0.5464  | 0.549793 | -2.49114 | 0.021705 | 0.056366 | -3.73709 |
| LTN1     | -1.10278 | 0.278257 | -2.49202 | 0.022182 | 0.057348 | -3.73837 |
| SYT10    | 0.710125 | -0.45405 | 2.49202  | 0.022182 | 0.057348 | -3.73838 |
| KGFLP2   | 0.603547 | -0.54472 | 2.473156 | 0.023079 | 0.059104 | -3.73963 |
| ZNF410   | -0.33876 | -0.02143 | -2.48975 | 0.021769 | 0.056517 | -3.73976 |
| ZNF263   | -0.44856 | 0.342389 | -2.48968 | 0.021772 | 0.056518 | -3.7399  |
| USP30    | -0.80947 | 0.657484 | -2.48933 | 0.021788 | 0.056553 | -3.74058 |
| C6orf145 | 0.574332 | 0.08391  | 2.488898 | 0.021808 | 0.05659  | -3.74142 |
| MORC3    | -0.79044 | 0.145824 | -2.48875 | 0.021815 | 0.0566   | -3.7417  |
| SOCS5    | -0.82693 | 0.060104 | -2.48802 | 0.021849 | 0.056682 | -3.74312 |
| GDPD3    | -1.10111 | 1.317153 | -2.4878  | 0.021859 | 0.0567   | -3.74354 |
| HIRA     | 0.849762 | -0.35134 | 2.4872   | 0.021887 | 0.056765 | -3.74471 |
| LOC33865 | 0.797094 | -0.5092  | 2.472385 | 0.023708 | 0.060281 | -3.74564 |
| FAM83E   | 0.38292  | -0.20967 | 2.486673 | 0.021912 | 0.056818 | -3.74573 |
| GLIPR1L1 | 0.341524 | -0.08401 | 2.48664  | 0.021913 | 0.056818 | -3.74579 |
| FPGT     | -1.01054 | 0.084689 | -2.47463 | 0.024264 | 0.061345 | -3.74591 |
| ACAP3    | -0.63918 | 0.858293 | -2.48654 | 0.021918 | 0.056823 | -3.74599 |
| RG9MTD2  | -0.74463 | -0.16022 | -2.48636 | 0.021927 | 0.056837 | -3.74634 |
| VRTN     | 0.367792 | -0.3337  | 2.48892  | 0.02291  | 0.05881  | -3.74692 |
| ATRNL1   | 1.013821 | -0.78463 | 2.473894 | 0.0243   | 0.061405 | -3.74728 |
| HSPA12A  | -0.97671 | 0.018409 | -2.48546 | 0.021969 | 0.056929 | -3.74808 |
| LILRA2   | -0.75075 | 0.741005 | -2.48541 | 0.021971 | 0.056929 | -3.74816 |
| INTS10   | -0.36354 | -0.02479 | -2.48512 | 0.021984 | 0.056956 | -3.74872 |
| CYP4F12  | 1.076005 | -0.10965 | 2.486324 | 0.02245  | 0.057878 | -3.74928 |
| SLC35A3  | -0.54434 | -0.04387 | -2.4848  | 0.021999 | 0.056973 | -3.74934 |
| ZNF847P  | 1.283815 | 0.174714 | 2.484803 | 0.021999 | 0.056973 | -3.74934 |
| LHX3     | 0.661744 | -0.00212 | 2.483704 | 0.022051 | 0.057076 | -3.75147 |
| NIT2     | 0.660879 | -0.14045 | 2.483415 | 0.022064 | 0.057103 | -3.75203 |
| TBX15    | 0.698736 | -0.22327 | 2.482669 | 0.022099 | 0.057186 | -3.75347 |
| MUC3A    | -0.94233 | -0.16768 | -2.48249 | 0.022108 | 0.0572   | -3.75381 |
| IGIP     | 1.446732 | -0.6671  | 2.472053 | 0.02515  | 0.063009 | -3.75488 |
| ITGAM    | -1.15501 | 0.652969 | -2.48192 | 0.022135 | 0.057262 | -3.75491 |
| SYTL2    | 0.840718 | -0.20081 | 2.483326 | 0.022591 | 0.058183 | -3.75502 |
| CDCA8    | -0.76629 | 0.410345 | -2.4816  | 0.02215  | 0.057294 | -3.75553 |
| RNF185   | -0.67586 | 0.289374 | -2.48119 | 0.022169 | 0.057337 | -3.75633 |
| KIF13A   | -0.98173 | 0.160182 | -2.48111 | 0.022173 | 0.057339 | -3.75649 |
| SERPINI1 | -1.22191 | 0.44251  | -2.4821  | 0.02265  | 0.058287 | -3.75737 |
| MMP17    | 0.559004 | -0.1122  | 2.480397 | 0.022206 | 0.057403 | -3.75786 |
| CASP8    | 0.388939 | -0.76007 | 2.480223 | 0.022215 | 0.057416 | -3.75819 |
| C21orf49 | 0.712699 | -0.38757 | 2.479967 | 0.022227 | 0.057434 | -3.75869 |
| RAPGEFL1 | -1.23607 | 1.406356 | -2.47992 | 0.022229 | 0.057434 | -3.75877 |
| RAP1A    | -0.68211 | 0.127778 | -2.47989 | 0.02223  | 0.057434 | -3.75884 |
| TMPO     | -0.55421 | 0.395316 | -2.47968 | 0.02224  | 0.057453 | -3.75925 |
| GNAS     | 0.536036 | -0.12404 | 2.479448 | 0.022251 | 0.057467 | -3.75969 |

|           |          |          |          |          |          |          |
|-----------|----------|----------|----------|----------|----------|----------|
| C19orf47  | -0.51454 | 0.716226 | -2.4794  | 0.022253 | 0.057467 | -3.75978 |
| ZNF431    | -0.56345 | 0.242763 | -2.47938 | 0.022255 | 0.057467 | -3.75983 |
| LOC100131 | 1.036254 | -0.10274 | 2.479207 | 0.022263 | 0.05748  | -3.76016 |
| SGCB      | 0.73534  | -0.17149 | 2.462175 | 0.023616 | 0.060126 | -3.76051 |
| THBS1     | -0.76034 | 0.270265 | -2.47855 | 0.022294 | 0.057553 | -3.76143 |
| CYP2B7P1  | 0.467761 | -0.36262 | 2.444002 | 0.025823 | 0.064229 | -3.7621  |
| CALML5    | -0.67951 | 0.227883 | -2.47934 | 0.022781 | 0.058548 | -3.76264 |
| PURG      | -0.9345  | 0.24179  | -2.47785 | 0.022327 | 0.05763  | -3.76277 |
| SLC45A1   | 0.90049  | -0.33986 | 2.414371 | 0.02742  | 0.067386 | -3.76335 |
| CALCOCO2  | -1.06164 | 0.916018 | -2.47751 | 0.022343 | 0.057665 | -3.76344 |
| HTR2A     | -0.70712 | -0.00095 | -2.4789  | 0.022802 | 0.05858  | -3.76348 |
| TUBA3D    | -0.80429 | 0.516455 | -2.47675 | 0.022379 | 0.057743 | -3.7649  |
| TMBIM4    | -0.8222  | 0.012237 | -2.47667 | 0.022383 | 0.057745 | -3.76506 |
| C9orf100  | -0.53472 | 0.393228 | -2.47658 | 0.022387 | 0.057748 | -3.76523 |
| COL20A1   | 0.638791 | -0.20795 | 2.476393 | 0.022396 | 0.057764 | -3.76559 |
| CLNS1A    | 0.48135  | -0.17801 | 2.47618  | 0.022406 | 0.057782 | -3.766   |
| NPY6R     | 0.768999 | -0.55213 | 2.47598  | 0.022416 | 0.057799 | -3.76639 |
| PCOLCE2   | -2.19535 | 1.657138 | -2.47662 | 0.022912 | 0.05881  | -3.76783 |
| PUS3      | -1.2762  | 0.346557 | -2.47521 | 0.022453 | 0.057879 | -3.76788 |
| GPATCH4   | -0.75585 | 0.884494 | -2.47495 | 0.022465 | 0.057903 | -3.76838 |
| EPHB3     | 0.643494 | -0.02529 | 2.474884 | 0.022468 | 0.057903 | -3.7685  |
| CENPQ     | -1.06799 | 0.110926 | -2.47338 | 0.02254  | 0.058082 | -3.77141 |
| IL1RAPL1  | 0.783049 | -0.23427 | 2.472822 | 0.022567 | 0.058142 | -3.77248 |
| CD40      | -0.67882 | 0.678918 | -2.47257 | 0.022579 | 0.058165 | -3.77296 |
| RNASE8    | 0.380196 | -0.04472 | 2.472049 | 0.022604 | 0.058201 | -3.77397 |
| PRSS21    | 0.56449  | -0.04471 | 2.472038 | 0.022604 | 0.058201 | -3.77399 |
| C20orf160 | -1.17452 | 0.593108 | -2.47326 | 0.023073 | 0.059098 | -3.77424 |
| ITGA11    | 0.440585 | -0.45204 | 2.471714 | 0.02262  | 0.058233 | -3.77462 |
| LRRC36    | 0.64662  | -0.24647 | 2.454497 | 0.023998 | 0.0608   | -3.77508 |
| P2RY14    | -1.59692 | 0.885634 | -2.47131 | 0.022639 | 0.058276 | -3.77541 |
| MFRP      | 0.47021  | -0.40655 | 2.471183 | 0.022645 | 0.058284 | -3.77564 |
| WFDC11    | -0.41842 | 0.160242 | -2.47245 | 0.023113 | 0.059184 | -3.77579 |
| VN1R2     | -0.49091 | 0.26746  | -2.47102 | 0.022653 | 0.058288 | -3.77595 |
| ZMAT1     | -1.80405 | 0.824956 | -2.47023 | 0.022691 | 0.058368 | -3.77749 |
| CXCL14    | 0.79318  | -0.30541 | 2.470196 | 0.022693 | 0.058368 | -3.77755 |
| LOC100506 | 0.616262 | -0.24652 | 2.432233 | 0.025755 | 0.064121 | -3.77797 |
| AOAH      | -0.75006 | 0.521277 | -2.46994 | 0.022705 | 0.058392 | -3.77805 |
| SULT1A2   | 0.725343 | -0.17346 | 2.469357 | 0.022733 | 0.058456 | -3.77916 |
| CDK12     | 1.318235 | -0.35627 | 2.372316 | 0.030672 | 0.073384 | -3.77918 |
| LARP1     | -0.63885 | 0.780413 | -2.46924 | 0.022739 | 0.058464 | -3.7794  |
| CDC42SE2  | -0.67721 | 0.202009 | -2.46908 | 0.022747 | 0.058475 | -3.7797  |
| PCDHB12   | -0.58721 | 0.078874 | -2.47032 | 0.023216 | 0.059371 | -3.77986 |
| CYP2F1    | 0.524809 | -0.26516 | 2.468679 | 0.022766 | 0.058517 | -3.78047 |
| RHOBTB2   | 0.521541 | -0.01639 | 2.467968 | 0.022801 | 0.05858  | -3.78184 |
| ZSCAN16   | -0.68936 | 0.748679 | -2.46758 | 0.022819 | 0.058616 | -3.78259 |
| PCDHB14   | -0.64171 | -0.00074 | -2.46671 | 0.022862 | 0.058717 | -3.78427 |
| DDX52     | 0.434926 | -0.50318 | 2.466609 | 0.022866 | 0.058721 | -3.78446 |

|           |          |          |          |          |          |          |
|-----------|----------|----------|----------|----------|----------|----------|
| CR1L      | 1.40083  | -1.02458 | 2.451693 | 0.024743 | 0.062242 | -3.78447 |
| EFTUD2    | 0.525311 | -0.11897 | 2.466523 | 0.02287  | 0.058724 | -3.78462 |
| PLCH1     | 0.547812 | -0.27731 | 2.467355 | 0.023361 | 0.05964  | -3.78551 |
| SCAF11    | -0.52345 | 0.333179 | -2.4651  | 0.022939 | 0.058862 | -3.78736 |
| MAPKAPK3  | -0.41146 | 0.2657   | -2.46503 | 0.022943 | 0.058862 | -3.78749 |
| MAGI2-AS1 | -0.65227 | 0.070516 | -2.46501 | 0.022944 | 0.058862 | -3.78755 |
| FAM158A   | 0.383878 | -0.0832  | 2.464988 | 0.022945 | 0.058862 | -3.78758 |
| TMOD2     | -1.19752 | 0.878975 | -2.46624 | 0.023416 | 0.059756 | -3.78764 |
| FAM53C    | -0.80004 | 0.524486 | -2.46487 | 0.022951 | 0.058866 | -3.78781 |
| TRNT1     | -0.79403 | 0.446451 | -2.4648  | 0.022954 | 0.058866 | -3.78794 |
| PRPSAP1   | -0.25407 | 0.204927 | -2.46477 | 0.022956 | 0.058866 | -3.788   |
| MAP6      | 0.452042 | -0.48637 | 2.466036 | 0.023426 | 0.059763 | -3.78802 |
| DAND5     | 0.807997 | -1.05822 | 2.468075 | 0.025351 | 0.063422 | -3.78838 |
| LOC100129 | -0.44654 | 0.288476 | -2.46766 | 0.02461  | 0.06199  | -3.78856 |
| SCEL      | 0.696237 | -0.61301 | 2.467565 | 0.025377 | 0.063479 | -3.78932 |
| UGT2B4    | 0.34932  | -0.09672 | 2.464085 | 0.022989 | 0.058944 | -3.78932 |
| NUF2      | -1.4364  | 0.632567 | -2.464   | 0.022993 | 0.058947 | -3.78948 |
| LOC100506 | -0.67827 | -0.18275 | -2.46382 | 0.023002 | 0.058961 | -3.78983 |
| NADK      | -0.67963 | 0.595856 | -2.46363 | 0.023011 | 0.058977 | -3.79019 |
| PTPN7     | -0.71156 | 0.525085 | -2.46347 | 0.023019 | 0.058983 | -3.7905  |
| ZCCHC7    | -0.63319 | 0.181294 | -2.46346 | 0.02302  | 0.058983 | -3.79052 |
| FPGS      | 0.46505  | -0.04177 | 2.462909 | 0.023047 | 0.059045 | -3.79158 |
| GSTM1     | -0.81821 | 0.448609 | -2.46261 | 0.023061 | 0.059074 | -3.79215 |
| EPHA8     | 0.665402 | -0.18568 | 2.461305 | 0.023125 | 0.059207 | -3.79467 |
| C19orf43  | -0.92234 | 0.672074 | -2.4608  | 0.02315  | 0.059263 | -3.79565 |
| HOXD10    | 0.630352 | -0.36504 | 2.460662 | 0.023157 | 0.059273 | -3.79591 |
| MED13     | -0.7354  | 0.629278 | -2.46042 | 0.023169 | 0.059295 | -3.79638 |
| CBLB      | -0.92779 | 1.099122 | -2.46015 | 0.023182 | 0.059314 | -3.7969  |
| Sep-09    | 0.612099 | -0.09174 | 2.459843 | 0.023197 | 0.059344 | -3.79748 |
| SPIC      | -0.62965 | 0.35636  | -2.45962 | 0.023208 | 0.059365 | -3.79792 |
| APOBEC3F  | -0.83437 | 1.115282 | -2.45952 | 0.023213 | 0.059369 | -3.7981  |
| FAM75A2   | -0.58396 | -0.02613 | -2.4616  | 0.024242 | 0.061306 | -3.79846 |
| AP3D1     | -0.5201  | 0.833615 | -2.45933 | 0.023222 | 0.059378 | -3.79847 |
| TFRC      | -0.73795 | -0.23722 | -2.45907 | 0.023235 | 0.059403 | -3.79898 |
| RHAG      | 1.252208 | -0.67074 | 2.447681 | 0.026405 | 0.065359 | -3.79937 |
| FSTL3     | -0.82628 | 0.898986 | -2.45883 | 0.023247 | 0.059425 | -3.79943 |
| CENPN     | -0.8103  | 0.474191 | -2.45819 | 0.023278 | 0.059498 | -3.80066 |
| PTPRB     | 0.833337 | -0.09048 | 2.459191 | 0.023764 | 0.060385 | -3.80106 |
| C15orf43  | 0.622281 | -0.06677 | 2.457478 | 0.023313 | 0.059559 | -3.80203 |
| ALG6      | -0.54271 | -0.10417 | -2.45747 | 0.023314 | 0.059559 | -3.80205 |
| CLEC3A    | -0.67897 | 0.01987  | -2.45746 | 0.023314 | 0.059559 | -3.80207 |
| NNMT      | -0.90207 | 0.517327 | -2.45702 | 0.023336 | 0.059608 | -3.80292 |
| C2orf78   | 0.481298 | -0.07557 | 2.458137 | 0.023816 | 0.060495 | -3.80306 |
| CHRD      | 0.444164 | -0.33399 | 2.456862 | 0.023344 | 0.059619 | -3.80322 |
| PLCB2     | -0.61502 | 0.590985 | -2.45674 | 0.02335  | 0.059627 | -3.80345 |
| DCC       | -0.82713 | 0.192252 | -2.45656 | 0.023359 | 0.05964  | -3.80381 |
| LAMA4     | 0.572314 | -0.26008 | 2.456142 | 0.02338  | 0.059679 | -3.8046  |



|          |          |          |          |          |          |          |
|----------|----------|----------|----------|----------|----------|----------|
| PNMA3    | 0.547982 | -0.3137  | 2.455218 | 0.023425 | 0.059763 | -3.80638 |
| KIAA0391 | -0.36116 | 0.107025 | -2.45517 | 0.023428 | 0.059763 | -3.80646 |
| NAA30    | -0.43306 | 0.352107 | -2.45486 | 0.023443 | 0.059789 | -3.80706 |
| HBG1     | 2.605221 | -1.41878 | 2.454843 | 0.023444 | 0.059789 | -3.8071  |
| SGK3     | -0.63961 | 0.067486 | -2.45453 | 0.023459 | 0.059821 | -3.8077  |
| ZBTB43   | -0.88752 | 0.614088 | -2.45392 | 0.02349  | 0.059891 | -3.80887 |
| ANKRD20A | -0.45035 | 0.089591 | -2.45339 | 0.023516 | 0.059942 | -3.8099  |
| RLBP1    | 0.667867 | -0.42364 | 2.453301 | 0.023521 | 0.059942 | -3.81006 |
| CAMSAP3  | -1.12804 | 0.77544  | -2.4533  | 0.023521 | 0.059942 | -3.81006 |
| PSMB8    | -0.5348  | 0.224445 | -2.45319 | 0.023526 | 0.059942 | -3.81027 |
| ITGB3BP  | -0.56029 | -0.14647 | -2.45318 | 0.023527 | 0.059942 | -3.81029 |
| PKD1L2   | -0.45949 | -0.05696 | -2.45314 | 0.023528 | 0.059942 | -3.81036 |
| C3orf24  | -0.53161 | 0.118303 | -2.45275 | 0.023548 | 0.059984 | -3.81111 |
| L3MBTL1  | -0.77299 | 1.012328 | -2.45252 | 0.02356  | 0.060007 | -3.81157 |
| STAG3L4  | -0.87461 | 0.276954 | -2.45161 | 0.023605 | 0.060114 | -3.81331 |
| PEX16    | -0.34812 | 0.148881 | -2.45136 | 0.023618 | 0.060126 | -3.81379 |
| PPP1R3B  | -1.09616 | 0.66064  | -2.45133 | 0.023619 | 0.060126 | -3.81385 |
| MEP1B    | -0.70106 | 0.128788 | -2.43391 | 0.025053 | 0.062846 | -3.81403 |
| PRDX1    | 0.538178 | -0.30848 | 2.451071 | 0.023632 | 0.060151 | -3.81434 |
| FAM171A1 | 0.61094  | -0.4871  | 2.45095  | 0.023638 | 0.060159 | -3.81458 |
| PMPCB    | -0.38681 | -0.1372  | -2.45062 | 0.023654 | 0.060192 | -3.8152  |
| SRSF2    | -0.48935 | 0.050462 | -2.45057 | 0.023657 | 0.060192 | -3.81531 |
| CACNG8   | 0.783248 | -0.32419 | 2.45025  | 0.023673 | 0.060225 | -3.81592 |
| HNF4A    | 0.382274 | -0.23209 | 2.450069 | 0.023682 | 0.06024  | -3.81627 |
| TSPAN15  | 0.637005 | -0.35319 | 2.449885 | 0.023691 | 0.060256 | -3.81662 |
| CDK11B   | -0.29983 | 0.357282 | -2.44967 | 0.023702 | 0.060276 | -3.81704 |
| LRRC39   | -0.72809 | 0.150468 | -2.44947 | 0.023712 | 0.060285 | -3.81742 |
| LOC28627 | -0.87272 | 0.577481 | -2.44937 | 0.023717 | 0.06029  | -3.8176  |
| C16orf86 | -0.51221 | 0.516841 | -2.44922 | 0.023725 | 0.060301 | -3.81789 |
| EDA2R    | 0.296084 | -0.20748 | 2.448756 | 0.023748 | 0.060353 | -3.81879 |
| AGBL5    | -0.64016 | 0.744539 | -2.44797 | 0.023788 | 0.060438 | -3.8203  |
| TMEM138  | -0.48624 | 0.438693 | -2.44753 | 0.02381  | 0.060486 | -3.82115 |
| MGRN1    | -0.58969 | 0.383064 | -2.44707 | 0.023833 | 0.060518 | -3.82203 |
| HELLS    | -0.96877 | 0.377292 | -2.44703 | 0.023835 | 0.060518 | -3.8221  |
| ZNF711   | -0.95243 | 0.29445  | -2.44697 | 0.023838 | 0.060518 | -3.82221 |
| IQCD     | 0.597752 | 0.01127  | 2.446759 | 0.023849 | 0.060538 | -3.82262 |
| COLQ     | 0.808323 | -0.13268 | 2.446669 | 0.023853 | 0.060542 | -3.82279 |
| BMP15    | -0.45429 | -0.00683 | -2.44635 | 0.02387  | 0.060575 | -3.82341 |
| MRPL14   | 0.623585 | -0.49709 | 2.446196 | 0.023877 | 0.060586 | -3.8237  |
| MED19    | -0.37314 | 0.206911 | -2.44611 | 0.023881 | 0.060589 | -3.82386 |
| EIF1AX   | 0.605217 | -0.68838 | 2.446051 | 0.023884 | 0.060589 | -3.82398 |
| PPP1R32  | -0.63725 | 0.582435 | -2.44568 | 0.023903 | 0.060629 | -3.82469 |
| ZNF226   | -0.98284 | 0.482149 | -2.44547 | 0.023914 | 0.060649 | -3.8251  |
| ZFP112   | -0.72279 | 0.117115 | -2.44635 | 0.024411 | 0.061637 | -3.82546 |
| CCDC40   | 0.895991 | 0.242248 | 2.444816 | 0.023947 | 0.060724 | -3.82635 |
| CAPN9    | -0.58241 | 0.193434 | -2.44475 | 0.02395  | 0.060725 | -3.82647 |
| TRIM35   | 0.354717 | -0.27427 | 2.444307 | 0.023973 | 0.060766 | -3.82732 |

|           |          |          |          |          |          |          |
|-----------|----------|----------|----------|----------|----------|----------|
| MIS18A    | 0.489721 | -0.42961 | 2.444187 | 0.023979 | 0.060774 | -3.82755 |
| ZC4H2     | 0.681535 | -0.35277 | 2.444096 | 0.023983 | 0.060778 | -3.82773 |
| C17orf47  | -0.68702 | 0.223495 | -2.44513 | 0.024473 | 0.06174  | -3.82777 |
| UGT3A2    | -0.55693 | 0.187969 | -2.44387 | 0.023995 | 0.060799 | -3.82816 |
| CINP      | 0.701324 | -0.30796 | 2.443465 | 0.024015 | 0.060835 | -3.82894 |
| LOC727916 | -0.63249 | -0.00014 | -2.44319 | 0.02403  | 0.060863 | -3.82947 |
| TRIM24    | 0.427195 | -0.02997 | 2.44283  | 0.024048 | 0.060901 | -3.83015 |
| PRTG      | 0.881558 | -0.81234 | 2.445139 | 0.026539 | 0.065658 | -3.83032 |
| SDPR      | 0.804052 | 0.103392 | 2.443766 | 0.024543 | 0.061859 | -3.83037 |
| MYO1A     | 0.510759 | -0.2107  | 2.442718 | 0.024053 | 0.060903 | -3.83037 |
| LOC100501 | 0.769116 | -0.17875 | 2.42525  | 0.025509 | 0.063713 | -3.83037 |
| PRKACA    | -0.42286 | 0.552877 | -2.4427  | 0.024055 | 0.060903 | -3.83041 |
| C9orf30   | -1.09303 | 0.747426 | -2.44232 | 0.024074 | 0.060943 | -3.83113 |
| FAM3B     | 1.13716  | -0.44063 | 2.442079 | 0.024086 | 0.060966 | -3.83159 |
| CRISP1    | -1.03286 | 0.600882 | -2.44171 | 0.024105 | 0.061006 | -3.8323  |
| C16orf92  | 0.461248 | -0.31621 | 2.441393 | 0.024121 | 0.061039 | -3.83291 |
| SEC23A    | -0.6709  | -0.07854 | -2.44119 | 0.024131 | 0.061057 | -3.83329 |
| FAM123B   | 0.930042 | -0.17084 | 2.341012 | 0.032629 | 0.076871 | -3.83429 |
| LOC100657 | -0.90514 | 0.980142 | -2.44016 | 0.024184 | 0.061183 | -3.83527 |
| ZNF627    | -0.55545 | 0.025864 | -2.43938 | 0.024224 | 0.061275 | -3.83676 |
| EFHC2     | 0.702274 | -0.24809 | 2.440254 | 0.024723 | 0.062202 | -3.83702 |
| NTSR2     | 0.357827 | -0.28306 | 2.439045 | 0.024241 | 0.061306 | -3.83741 |
| ADC       | 0.416612 | -0.34995 | 2.438862 | 0.02425  | 0.061319 | -3.83776 |
| COMMD1    | -0.42002 | 0.34568  | -2.43847 | 0.02427  | 0.061349 | -3.83851 |
| MPHOSPH1  | -0.8314  | 0.521902 | -2.43844 | 0.024272 | 0.061349 | -3.83856 |
| XPNPEP1   | -0.79197 | 0.868457 | -2.43819 | 0.024285 | 0.061374 | -3.83904 |
| DGCR6L    | 0.560983 | -0.28733 | 2.437011 | 0.024345 | 0.061512 | -3.8413  |
| SCAMP3    | 0.485975 | -0.12297 | 2.43687  | 0.024353 | 0.061522 | -3.84157 |
| TNP1      | 1.292191 | -0.97362 | 2.371153 | 0.029917 | 0.072034 | -3.84167 |
| MAB21L1   | 0.956292 | -0.42976 | 2.43822  | 0.025439 | 0.063603 | -3.84234 |
| STK11IP   | -0.37927 | 0.240155 | -2.43629 | 0.024382 | 0.06159  | -3.84268 |
| GIPR      | 0.469987 | -0.53478 | 2.436223 | 0.024386 | 0.061591 | -3.84281 |
| CTNBL1    | -0.5323  | 0.582343 | -2.43582 | 0.024407 | 0.061634 | -3.84357 |
| BCAR4     | 0.601604 | -0.25872 | 2.435676 | 0.024414 | 0.061638 | -3.84386 |
| AFAP1     | 1.020076 | -0.53397 | 2.373144 | 0.039388 | 0.088577 | -3.8447  |
| PPP2R5E   | -0.55617 | 0.230871 | -2.43614 | 0.024937 | 0.062611 | -3.84483 |
| MRPS23    | -0.68624 | 0.394441 | -2.4351  | 0.024444 | 0.061704 | -3.84495 |
| LOC728767 | 0.813637 | -0.35538 | 2.435029 | 0.024448 | 0.061706 | -3.84509 |
| KRTAP4-7  | 1.344552 | -0.93867 | 2.406916 | 0.030615 | 0.07328  | -3.84551 |
| NR2C2AP   | 0.68825  | -0.39699 | 2.434629 | 0.024468 | 0.06174  | -3.84586 |
| HIST2H4B  | -0.68045 | 0.395815 | -2.43455 | 0.024472 | 0.06174  | -3.846   |
| ITCH      | -0.61601 | 0.328211 | -2.43447 | 0.024476 | 0.06174  | -3.84616 |
| KIAA1109  | -0.71071 | 0.496905 | -2.43447 | 0.024477 | 0.06174  | -3.84617 |
| APCDD1L   | 0.775276 | -0.35403 | 2.434148 | 0.024493 | 0.061773 | -3.84678 |
| CELF5     | 0.487359 | -0.32133 | 2.434059 | 0.024498 | 0.061777 | -3.84695 |
| NEK11     | -0.40829 | 0.12191  | -2.43383 | 0.02451  | 0.0618   | -3.8474  |
| FBXW9     | 0.489245 | -0.14186 | 2.433237 | 0.02454  | 0.061859 | -3.84852 |

|           |          |          |          |          |          |          |
|-----------|----------|----------|----------|----------|----------|----------|
| BAHCC1    | 0.654105 | 0.062515 | 2.433197 | 0.024542 | 0.061859 | -3.8486  |
| LOC728875 | 0.45021  | -0.28332 | 2.433013 | 0.024552 | 0.061874 | -3.84895 |
| TM7SF2    | -0.64395 | 0.623382 | -2.43282 | 0.024562 | 0.061891 | -3.84932 |
| LHFP      | 0.885296 | -0.14848 | 2.43266  | 0.02457  | 0.061904 | -3.84963 |
| SLC25A3   | 0.255327 | -0.32539 | 2.432344 | 0.024587 | 0.061938 | -3.85023 |
| MYADM     | -0.53606 | 0.317725 | -2.43177 | 0.024616 | 0.061997 | -3.85133 |
| GRM5      | 0.538137 | -0.30692 | 2.431598 | 0.024625 | 0.062011 | -3.85166 |
| ANKRD13C  | -1.02561 | 0.273965 | -2.43324 | 0.025701 | 0.064029 | -3.85167 |
| RAB7B     | 0.467588 | -0.30928 | 2.432132 | 0.025146 | 0.063009 | -3.85241 |
| ZAK       | -1.06659 | 0.514661 | -2.43089 | 0.024662 | 0.062095 | -3.853   |
| SLC33A1   | -0.67852 | -0.01652 | -2.43083 | 0.024665 | 0.062096 | -3.85312 |
| C15orf24  | -0.41008 | -0.05085 | -2.43056 | 0.024679 | 0.062123 | -3.85364 |
| MINA      | -0.58104 | 0.424488 | -2.43049 | 0.024683 | 0.062125 | -3.85378 |
| CD2BP2    | -0.51408 | 0.525056 | -2.4304  | 0.024688 | 0.062128 | -3.85394 |
| NDUFB3    | -0.84369 | 0.074916 | -2.43001 | 0.024708 | 0.062172 | -3.8547  |
| BANF2     | -0.57333 | -0.23041 | -2.41188 | 0.026229 | 0.065039 | -3.85554 |
| THRB      | 1.422687 | -0.82855 | 2.395573 | 0.040586 | 0.090708 | -3.85585 |
| DOK2      | 0.822269 | -0.03268 | 2.429113 | 0.024755 | 0.062262 | -3.85641 |
| IL7R      | 1.508626 | -0.52718 | 2.42908  | 0.024757 | 0.062262 | -3.85647 |
| TSPAN32   | -0.38563 | 0.459984 | -2.42899 | 0.024761 | 0.062265 | -3.85664 |
| LOC283481 | 0.495817 | -0.14696 | 2.428745 | 0.024774 | 0.06229  | -3.85711 |
| MCMBP     | -0.61797 | 0.346245 | -2.42892 | 0.025315 | 0.063349 | -3.85849 |
| RNLS      | -0.73384 | 0.442135 | -2.4276  | 0.024834 | 0.062431 | -3.85929 |
| CSNK1A1   | -0.6481  | 0.244127 | -2.42755 | 0.024837 | 0.062431 | -3.85939 |
| SGCG      | 1.352352 | -0.60526 | 2.308559 | 0.041677 | 0.09244  | -3.85963 |
| ABHD5     | -0.91277 | 0.591112 | -2.42695 | 0.024868 | 0.062503 | -3.86055 |
| LOC100508 | 0.347489 | -0.06737 | 2.427599 | 0.025385 | 0.063491 | -3.86098 |
| ZNF767    | -0.32702 | 0.153479 | -2.42665 | 0.024884 | 0.062533 | -3.8611  |
| ZNF385A   | 0.956136 | -0.16603 | 2.426214 | 0.024907 | 0.062566 | -3.86195 |
| DCDC1     | -0.6991  | 0.055447 | -2.42621 | 0.024907 | 0.062566 | -3.86195 |
| MAN1A1    | -1.1806  | 0.642022 | -2.42618 | 0.024909 | 0.062566 | -3.86202 |
| HIST1H3H  | -0.90998 | 0.906129 | -2.42616 | 0.02491  | 0.062566 | -3.86205 |
| CES4A     | -0.68791 | 0.669738 | -2.42588 | 0.024924 | 0.062595 | -3.86258 |
| DEAF1     | -0.57104 | 0.640229 | -2.42581 | 0.024928 | 0.062596 | -3.86271 |
| EFHD2     | -0.55987 | 0.376399 | -2.42545 | 0.024947 | 0.062629 | -3.86341 |
| GOLPH3L   | -0.67953 | 0.532267 | -2.42533 | 0.024953 | 0.062636 | -3.86363 |
| CENPJ     | -0.61528 | 0.667445 | -2.42473 | 0.024985 | 0.0627   | -3.86478 |
| HHATL     | 0.40738  | -0.07696 | 2.424727 | 0.024985 | 0.0627   | -3.86479 |
| CD302     | -0.75301 | 0.2365   | -2.42424 | 0.025011 | 0.062756 | -3.86572 |
| SNX21     | -0.68222 | 0.56027  | -2.42412 | 0.025017 | 0.062764 | -3.86595 |
| AGAP1     | 0.436122 | -0.50796 | 2.423224 | 0.025064 | 0.062866 | -3.86766 |
| PRR11     | 0.498974 | -0.76119 | 2.423126 | 0.02507  | 0.062871 | -3.86784 |
| SLC9A6    | -0.83185 | 0.406773 | -2.42305 | 0.025074 | 0.062873 | -3.86799 |
| TRPC7     | 0.512818 | -0.31437 | 2.422779 | 0.025088 | 0.062901 | -3.8685  |
| ANKK1     | 0.500452 | -0.88509 | 2.422302 | 0.025113 | 0.062957 | -3.86942 |
| FAM126A   | -0.50966 | 0.212472 | -2.42292 | 0.025633 | 0.063884 | -3.86982 |
| RALGAPB   | -0.40324 | 0.034757 | -2.42194 | 0.025133 | 0.062997 | -3.87011 |

|           |          |          |          |          |          |          |
|-----------|----------|----------|----------|----------|----------|----------|
| SLC38A11  | 0.54542  | -0.51627 | 2.423274 | 0.026233 | 0.065041 | -3.8703  |
| PPP2R2D   | -0.77945 | 0.586451 | -2.42163 | 0.025149 | 0.063009 | -3.87071 |
| EXOSC10   | 0.458833 | -0.22207 | 2.421602 | 0.02515  | 0.063009 | -3.87075 |
| LOC100655 | -1.27922 | 0.33459  | -2.421   | 0.025182 | 0.063081 | -3.8719  |
| ZNF197    | -1.14514 | 0.703551 | -2.42055 | 0.025206 | 0.063133 | -3.87276 |
| ELTD1     | 0.542503 | -0.23406 | 2.421502 | 0.026329 | 0.06522  | -3.8736  |
| LPHN2     | 0.386292 | -0.14601 | 2.419734 | 0.02525  | 0.063229 | -3.87431 |
| ABHD14A   | 0.714496 | -0.09662 | 2.419654 | 0.025254 | 0.063229 | -3.87447 |
| KLHL8     | -1.01536 | 0.474923 | -2.41965 | 0.025254 | 0.063229 | -3.87448 |
| MEFV      | -0.59553 | 0.422918 | -2.41954 | 0.02526  | 0.063235 | -3.87468 |
| PPAPDC3   | 0.845543 | -0.00934 | 2.418848 | 0.025297 | 0.063319 | -3.876   |
| SPINK4    | 0.769396 | -0.28729 | 2.418566 | 0.025312 | 0.063349 | -3.87654 |
| PTAR1     | -0.78153 | -0.07697 | -2.41813 | 0.025335 | 0.063392 | -3.87738 |
| LOC100501 | 1.090129 | -0.71118 | 2.404858 | 0.030736 | 0.073488 | -3.87934 |
| TSGA10    | -0.65332 | 0.262453 | -2.4164  | 0.025427 | 0.06359  | -3.88067 |
| AHSG      | 0.453635 | -0.22367 | 2.416317 | 0.025432 | 0.063593 | -3.88083 |
| KCNK6     | -0.4187  | 0.409524 | -2.41611 | 0.025443 | 0.063604 | -3.88122 |
| C5orf47   | -0.50758 | 0.101517 | -2.41591 | 0.025454 | 0.063623 | -3.8816  |
| USP16     | -0.6413  | 0.219553 | -2.41664 | 0.025971 | 0.064536 | -3.88167 |
| PUM2      | -0.56147 | 0.435652 | -2.41531 | 0.025486 | 0.063684 | -3.88274 |
| PSMA6     | -1.16926 | -0.33005 | -2.41529 | 0.025487 | 0.063684 | -3.88279 |
| TMED2     | -0.7357  | -0.01015 | -2.41522 | 0.025491 | 0.063684 | -3.88292 |
| FEM1B     | -0.68548 | 0.419449 | -2.4152  | 0.025492 | 0.063684 | -3.88295 |
| ZNF593    | 0.578301 | -0.22612 | 2.415152 | 0.025495 | 0.063684 | -3.88305 |
| ACTR3C    | -0.95492 | 0.381853 | -2.41476 | 0.025515 | 0.06372  | -3.88379 |
| LOC100506 | -0.54925 | 0.009727 | -2.41449 | 0.02553  | 0.063742 | -3.88431 |
| IFRD2     | 0.639187 | -0.28908 | 2.414477 | 0.025531 | 0.063742 | -3.88433 |
| SPOPL     | -0.90225 | 0.662899 | -2.41423 | 0.025544 | 0.063759 | -3.88481 |
| PPP1R16A  | -0.46501 | 0.610758 | -2.41392 | 0.025561 | 0.063785 | -3.88539 |
| LOC646511 | 0.486277 | -0.39721 | 2.413824 | 0.025566 | 0.063789 | -3.88558 |
| SNRNP48   | -0.6306  | 0.39561  | -2.41376 | 0.025569 | 0.06379  | -3.88569 |
| MMP19     | 0.499797 | -0.30417 | 2.413459 | 0.025586 | 0.063821 | -3.88627 |
| CENPA     | -1.49853 | 0.408446 | -2.41341 | 0.025588 | 0.063821 | -3.88637 |
| FLII      | -0.5232  | 0.45711  | -2.41311 | 0.025604 | 0.063853 | -3.88693 |
| JUP       | 1.055063 | -0.31384 | 2.412987 | 0.025611 | 0.063857 | -3.88717 |
| PEX10     | 0.437269 | -0.03138 | 2.412961 | 0.025612 | 0.063857 | -3.88722 |
| ADAM30    | 0.871322 | -0.3083  | 2.412749 | 0.025624 | 0.063877 | -3.88763 |
| USP1      | -0.73915 | -0.16889 | -2.41269 | 0.025627 | 0.063877 | -3.88774 |
| SERPINA13 | 0.804851 | -0.42354 | 2.352278 | 0.03287  | 0.077216 | -3.88827 |
| SETP4     | 0.807582 | -0.12433 | 2.412842 | 0.026177 | 0.064934 | -3.88884 |
| SLC19A2   | -0.93821 | 0.308578 | -2.41148 | 0.025692 | 0.064015 | -3.89004 |
| TXNDC9    | -0.90173 | -0.17554 | -2.41107 | 0.025715 | 0.064054 | -3.89082 |
| ZNF462    | 0.882006 | -0.48559 | 2.367042 | 0.03761  | 0.0855   | -3.89085 |
| OFD1      | -0.39637 | 0.384867 | -2.41067 | 0.025736 | 0.064095 | -3.89158 |
| CLCN6     | -0.42868 | 0.432955 | -2.41065 | 0.025737 | 0.064095 | -3.89162 |
| CD163L1   | -0.85904 | 0.129357 | -2.41029 | 0.025757 | 0.064121 | -3.89232 |
| NPTXR     | 0.385969 | -0.23092 | 2.410277 | 0.025758 | 0.064121 | -3.89233 |

|           |          |          |          |          |          |          |
|-----------|----------|----------|----------|----------|----------|----------|
| POTEM     | -0.67774 | 0.524351 | -2.41019 | 0.025762 | 0.064124 | -3.8925  |
| GCFC1     | -0.86698 | 0.242745 | -2.41005 | 0.02577  | 0.064134 | -3.89276 |
| SLCO2A1   | -0.52986 | 0.34356  | -2.41072 | 0.026293 | 0.065139 | -3.89284 |
| TTN       | -0.73632 | 0.392906 | -2.40998 | 0.025774 | 0.064137 | -3.8929  |
| SPTBN4    | 0.472829 | -0.2185  | 2.409605 | 0.025794 | 0.064179 | -3.89361 |
| LOC100506 | 1.26577  | -1.0895  | 2.36514  | 0.037736 | 0.085677 | -3.89391 |
| GRAPL     | -0.70919 | 0.659404 | -2.40911 | 0.025821 | 0.064229 | -3.89455 |
| PLXNA1    | -0.3567  | 0.190561 | -2.40905 | 0.025824 | 0.064229 | -3.89467 |
| GON4L     | -0.62814 | 0.443051 | -2.40864 | 0.025847 | 0.064277 | -3.89545 |
| ZNF564    | -0.95886 | 0.491718 | -2.40806 | 0.025878 | 0.064347 | -3.89656 |
| GPATCH3   | -0.28007 | 0.234984 | -2.40766 | 0.0259   | 0.064393 | -3.89731 |
| PRKX      | 0.597317 | -0.27827 | 2.407468 | 0.02591  | 0.064411 | -3.89768 |
| MGAT4B    | -0.48226 | 0.56569  | -2.40738 | 0.025915 | 0.064415 | -3.89785 |
| RERGL     | -0.71567 | 0.180544 | -2.40679 | 0.025948 | 0.064487 | -3.89897 |
| ZFC3H1    | -0.66579 | 0.313744 | -2.40618 | 0.025981 | 0.064553 | -3.90012 |
| TSPAN8    | -0.38237 | 0.03796  | -2.40661 | 0.027146 | 0.066855 | -3.90136 |
| STAMBPL1  | -0.82961 | 0.526094 | -2.40597 | 0.026553 | 0.065676 | -3.90178 |
| PHF16     | 0.404395 | -0.39317 | 2.4051   | 0.02604  | 0.064691 | -3.90218 |
| SNAPC2    | 0.472727 | -0.21257 | 2.40476  | 0.026058 | 0.06473  | -3.90282 |
| KCNA1     | 0.54462  | -0.11288 | 2.40503  | 0.026605 | 0.065747 | -3.90355 |
| CCND1     | -0.39762 | 0.236369 | -2.40434 | 0.026081 | 0.064778 | -3.90362 |
| AIG1      | -0.7027  | 0.23692  | -2.40419 | 0.02609  | 0.064785 | -3.90391 |
| TGFB1     | -0.45716 | 0.611685 | -2.40417 | 0.026091 | 0.064785 | -3.90395 |
| TTC39C    | 0.607852 | -0.25012 | 2.403803 | 0.026111 | 0.064819 | -3.90464 |
| PARP16    | 0.555628 | -0.13276 | 2.403721 | 0.026115 | 0.064822 | -3.9048  |
| LOC100507 | -0.50967 | 0.165739 | -2.4043  | 0.026646 | 0.065813 | -3.90492 |
| RAB13     | 0.391648 | -0.11299 | 2.403594 | 0.026122 | 0.064831 | -3.90504 |
| CYBRD1    | 0.867023 | -0.66575 | 2.403182 | 0.026145 | 0.064879 | -3.90582 |
| LSP1      | 0.50546  | -0.1315  | 2.402728 | 0.02617  | 0.064933 | -3.90669 |
| LOC100655 | -0.87589 | 0.422298 | -2.4026  | 0.026177 | 0.064934 | -3.90693 |
| KCNMA1    | -2.27849 | 1.17801  | -2.40252 | 0.026181 | 0.064937 | -3.90708 |
| PGRMC2    | -0.371   | 0.301721 | -2.40185 | 0.026218 | 0.065019 | -3.90835 |
| ZC3HAV1   | -0.73886 | 0.869758 | -2.40085 | 0.026273 | 0.065125 | -3.91025 |
| ECI1      | 0.540597 | -0.212   | 2.400797 | 0.026276 | 0.065125 | -3.91036 |
| AFTPH     | -0.71488 | 0.411471 | -2.40072 | 0.026281 | 0.065125 | -3.9105  |
| TIMP3     | 0.521891 | -0.36599 | 2.400717 | 0.026281 | 0.065125 | -3.91051 |
| MST1R     | 0.601155 | -0.31537 | 2.400616 | 0.026286 | 0.065131 | -3.9107  |
| XYLT1     | 0.536412 | -0.32343 | 2.399333 | 0.026357 | 0.065282 | -3.91313 |
| INVS      | -0.60923 | 0.658181 | -2.39918 | 0.026366 | 0.065294 | -3.91342 |
| SYPL1     | 0.421669 | -0.72621 | 2.399107 | 0.02637  | 0.065294 | -3.91356 |
| VGLL3     | 0.386667 | -0.22499 | 2.399067 | 0.026372 | 0.065294 | -3.91364 |
| C15orf42  | -0.81731 | 0.456693 | -2.39859 | 0.026398 | 0.065351 | -3.91454 |
| KIDINS220 | -0.95142 | 0.421103 | -2.39749 | 0.026459 | 0.065485 | -3.91663 |
| CNDP2     | -0.58024 | 0.495841 | -2.39686 | 0.026495 | 0.065565 | -3.91783 |
| TCOF1     | 0.539724 | 0.055415 | 2.396595 | 0.026509 | 0.065592 | -3.91833 |
| PHF3      | -0.46261 | 0.336417 | -2.3959  | 0.026548 | 0.065672 | -3.91965 |
| COX2      | 0.773213 | -0.2118  | 2.395622 | 0.026564 | 0.065693 | -3.92018 |

|           |          |          |          |          |          |          |
|-----------|----------|----------|----------|----------|----------|----------|
| UBE2V1    | -0.33423 | 0.226597 | -2.39555 | 0.026568 | 0.065695 | -3.92031 |
| RPS20P27  | 1.012979 | -0.93793 | 2.395153 | 0.02659  | 0.065739 | -3.92107 |
| PQLC2     | 0.28715  | -0.04656 | 2.395113 | 0.026592 | 0.065739 | -3.92114 |
| C4orf33   | -0.99921 | 0.053221 | -2.39496 | 0.026601 | 0.065747 | -3.92144 |
| SKAP2     | -0.9471  | 0.4095   | -2.39487 | 0.026606 | 0.065747 | -3.9216  |
| CCDC83    | -0.6884  | 0.115362 | -2.39461 | 0.02662  | 0.065775 | -3.9221  |
| UBAC2-AS1 | -0.47038 | 0.46839  | -2.3945  | 0.026627 | 0.065782 | -3.92231 |
| PEX11G    | -0.79814 | 0.148351 | -2.39426 | 0.02664  | 0.065807 | -3.92276 |
| SPATA2    | -0.90275 | 0.444744 | -2.39401 | 0.026654 | 0.065824 | -3.92323 |
| CABYR     | 0.685889 | -0.03151 | 2.394355 | 0.027202 | 0.066942 | -3.92361 |
| SPC25     | -1.09871 | 0.570322 | -2.39363 | 0.026675 | 0.065862 | -3.92396 |
| FAM86B2   | -0.73623 | 0.283329 | -2.39362 | 0.026676 | 0.065862 | -3.92397 |
| ZNF770    | 0.371291 | -0.50907 | 2.393518 | 0.026681 | 0.065868 | -3.92417 |
| WDR54     | 0.673612 | -0.31444 | 2.393395 | 0.026688 | 0.065877 | -3.9244  |
| LIN7C     | -0.82897 | 0.311829 | -2.39271 | 0.026727 | 0.065964 | -3.92571 |
| RHOBTB1   | 1.064125 | -0.11959 | 2.375637 | 0.028922 | 0.070119 | -3.92586 |
| PTF1A     | 0.341571 | -0.36611 | 2.390069 | 0.026875 | 0.066322 | -3.93071 |
| LOC100129 | 0.548364 | -0.505   | 2.373492 | 0.033898 | 0.078941 | -3.93157 |
| DPPA2     | 0.843254 | -0.25952 | 2.390105 | 0.027443 | 0.067409 | -3.93159 |
| NKAIN2    | 0.451257 | -0.01276 | 2.390092 | 0.027443 | 0.067409 | -3.93161 |
| MZF1      | -0.33682 | 0.458256 | -2.38959 | 0.026903 | 0.066381 | -3.93162 |
| HNRNPA3   | -0.88137 | 0.402276 | -2.38947 | 0.026909 | 0.066388 | -3.93184 |
| LOC64344  | -0.64139 | 0.059203 | -2.38976 | 0.027462 | 0.067439 | -3.93224 |
| MLL5      | -0.66192 | 0.568039 | -2.38906 | 0.026932 | 0.066436 | -3.93261 |
| RBM38     | 0.982979 | -0.15075 | 2.388767 | 0.026949 | 0.06647  | -3.93317 |
| FAM122B   | -0.50912 | 0.303293 | -2.38862 | 0.026957 | 0.066482 | -3.93345 |
| MAGEA5    | 0.514321 | -0.50838 | 2.374052 | 0.031509 | 0.07489  | -3.93346 |
| TNFSF8    | 0.250488 | -0.07468 | 2.388397 | 0.02697  | 0.066504 | -3.93387 |
| C1orf87   | -0.50772 | -0.33524 | -2.38833 | 0.026973 | 0.066505 | -3.934   |
| LOC40079  | 0.379985 | -0.10789 | 2.388429 | 0.027538 | 0.067557 | -3.93473 |
| C2orf16   | -0.46306 | -0.03772 | -2.38793 | 0.026996 | 0.066553 | -3.93475 |
| TP53AIP1  | 0.612489 | -0.26916 | 2.387858 | 0.027    | 0.066555 | -3.93489 |
| KCTD13    | -0.37442 | 0.499754 | -2.38771 | 0.027008 | 0.066566 | -3.93517 |
| HRCT1     | 0.425893 | -0.33755 | 2.346794 | 0.030673 | 0.073384 | -3.93543 |
| PAH       | -0.54451 | 0.085101 | -2.38712 | 0.027042 | 0.066642 | -3.9363  |
| ARHGAP35  | -0.65158 | 0.670557 | -2.38609 | 0.0271   | 0.066773 | -3.93824 |
| PFKFB4    | -0.83703 | 0.443733 | -2.38605 | 0.027103 | 0.066773 | -3.93831 |
| B3GNT7    | 0.375949 | -0.0582  | 2.385889 | 0.027112 | 0.066788 | -3.93862 |
| KIRREL2   | 0.278161 | -0.02699 | 2.386293 | 0.02766  | 0.067772 | -3.93873 |
| POLD3     | -0.45423 | 0.044866 | -2.38578 | 0.027118 | 0.066795 | -3.93882 |
| GUCA1A    | 0.763209 | -0.33068 | 2.316183 | 0.033401 | 0.078107 | -3.9403  |
| POU5F1    | 0.471163 | -0.31582 | 2.384809 | 0.027173 | 0.066914 | -3.94067 |
| LCE1E     | 1.136577 | -1.04746 | 2.265208 | 0.047294 | 0.101733 | -3.94081 |
| PPM1G     | -0.36682 | 0.44185  | -2.38456 | 0.027188 | 0.066935 | -3.94114 |
| ZNF404    | -1.02906 | 0.405924 | -2.38446 | 0.027193 | 0.066935 | -3.94132 |
| EPDR1     | -1.01076 | 0.323937 | -2.38443 | 0.027195 | 0.066935 | -3.94139 |
| SHISA7    | 0.627821 | -0.29217 | 2.384424 | 0.027195 | 0.066935 | -3.94139 |

|           |          |          |          |          |          |          |
|-----------|----------|----------|----------|----------|----------|----------|
| BANF1     | -0.50333 | 0.733672 | -2.38418 | 0.02721  | 0.066953 | -3.94186 |
| TRIM72    | 0.382977 | -0.14693 | 2.384079 | 0.027215 | 0.066954 | -3.94205 |
| VCL       | -0.85389 | 0.897069 | -2.384   | 0.02722  | 0.066954 | -3.94219 |
| CNIH      | -0.43213 | -0.11978 | -2.38398 | 0.02722  | 0.066954 | -3.94223 |
| BID       | -0.73263 | 0.459251 | -2.38391 | 0.027225 | 0.066956 | -3.94236 |
| IPW       | -0.8441  | 0.574305 | -2.36662 | 0.029459 | 0.071157 | -3.94248 |
| PHACTR1   | -1.05117 | 0.567414 | -2.38308 | 0.027272 | 0.067065 | -3.94394 |
| ETFA      | -0.42136 | 0.169998 | -2.38292 | 0.027281 | 0.067079 | -3.94425 |
| CCDC71    | -0.33302 | 0.306822 | -2.38232 | 0.027316 | 0.067155 | -3.94538 |
| TM7SF4    | -0.49563 | 0.197251 | -2.38282 | 0.028501 | 0.06939  | -3.94552 |
| ARFGEF1   | -0.39544 | 0.042728 | -2.3818  | 0.027346 | 0.06722  | -3.94636 |
| STYX      | -0.54381 | 0.26349  | -2.38159 | 0.027358 | 0.067241 | -3.94676 |
| C2orf80   | -0.79392 | 0.146249 | -2.36247 | 0.029058 | 0.070378 | -3.94791 |
| CHDH      | -0.58783 | 0.189677 | -2.3803  | 0.027431 | 0.067398 | -3.94919 |
| C8A       | -0.41066 | -0.0163  | -2.38029 | 0.027432 | 0.067398 | -3.94921 |
| ARFIP2    | 0.29438  | -0.09431 | 2.37985  | 0.027457 | 0.067435 | -3.95004 |
| TAF6      | -0.44795 | 0.443434 | -2.37964 | 0.02747  | 0.067449 | -3.95045 |
| KIAA1751  | -0.5185  | -0.03515 | -2.37943 | 0.027481 | 0.067469 | -3.95083 |
| GABPB2    | -0.80236 | 1.12873  | -2.37935 | 0.027486 | 0.067472 | -3.95098 |
| COMMD8    | -1.22087 | -0.46836 | -2.37898 | 0.027508 | 0.067517 | -3.95169 |
| PIK3CB    | -0.96373 | 0.525038 | -2.37875 | 0.027521 | 0.06754  | -3.95212 |
| LPXN      | 0.455166 | -0.05073 | 2.378566 | 0.027531 | 0.067557 | -3.95247 |
| PPP1CA    | -0.33633 | 0.429683 | -2.3785  | 0.027535 | 0.067557 | -3.9526  |
| BCL2L13   | -0.58001 | 0.420568 | -2.37836 | 0.027543 | 0.067561 | -3.95285 |
| RAB11FIP5 | 0.576867 | -0.44118 | 2.378193 | 0.027553 | 0.067577 | -3.95317 |
| APTX      | -0.33479 | 0.189094 | -2.37794 | 0.027567 | 0.067604 | -3.95365 |
| PDLIM7    | -0.74587 | 0.714438 | -2.37759 | 0.027587 | 0.067645 | -3.95431 |
| DCAF13    | -0.67506 | 0.249577 | -2.37752 | 0.027592 | 0.067646 | -3.95444 |
| DSN1      | -0.94538 | 0.519606 | -2.37746 | 0.027595 | 0.067646 | -3.95455 |
| TECPR2    | -0.86626 | 0.91356  | -2.37696 | 0.027624 | 0.067703 | -3.9555  |
| PTOV1     | -0.48729 | 0.686056 | -2.37694 | 0.027625 | 0.067703 | -3.95553 |
| ACSL3     | -1.02009 | 0.371673 | -2.37644 | 0.027654 | 0.067767 | -3.95649 |
| ISL2      | -1.21948 | 0.989708 | -2.37618 | 0.027669 | 0.067783 | -3.95698 |
| PJA2      | -1.01329 | 0.082613 | -2.37614 | 0.027672 | 0.067783 | -3.95706 |
| ATHL1     | -0.78592 | 0.636042 | -2.37565 | 0.0277   | 0.067844 | -3.95798 |
| MEPE      | 0.702393 | -0.16306 | 2.356914 | 0.029393 | 0.071031 | -3.95823 |
| RCL1      | -0.49962 | 0.076011 | -2.37481 | 0.027749 | 0.067955 | -3.95956 |
| DNAJC9    | -0.50719 | 0.422699 | -2.37431 | 0.027778 | 0.068018 | -3.96051 |
| DNAJC2    | -0.67224 | 0.494241 | -2.37408 | 0.027791 | 0.068042 | -3.96095 |
| CLDN1     | 0.757458 | -0.17919 | 2.373722 | 0.027812 | 0.068085 | -3.96162 |
| C17orf110 | 0.411357 | -0.14291 | 2.373892 | 0.02838  | 0.06918  | -3.96194 |
| GRPEL1    | -0.82501 | 0.334602 | -2.37339 | 0.027831 | 0.068118 | -3.96225 |
| C7orf36   | 0.432841 | -0.53295 | 2.373371 | 0.027833 | 0.068118 | -3.96228 |
| RAB28     | 0.660463 | -0.23355 | 2.37301  | 0.027854 | 0.068153 | -3.96296 |
| KLF13     | -0.48359 | 0.410198 | -2.37301 | 0.027854 | 0.068153 | -3.96297 |
| TAS2R40   | -0.42408 | -0.05921 | -2.37293 | 0.027858 | 0.068155 | -3.96311 |
| C14orf37  | -0.53171 | 0.218675 | -2.37314 | 0.028424 | 0.069245 | -3.96335 |

|           |          |          |          |          |          |          |
|-----------|----------|----------|----------|----------|----------|----------|
| LOC283588 | 0.459297 | -0.16767 | 2.372768 | 0.027868 | 0.06817  | -3.96342 |
| SLAIN2    | -0.78312 | 0.897013 | -2.3727  | 0.027871 | 0.068171 | -3.96354 |
| FAM166B   | 0.331294 | -0.26786 | 2.373011 | 0.028431 | 0.069255 | -3.96359 |
| BLNK      | -1.266   | 0.553184 | -2.35325 | 0.029616 | 0.07148  | -3.96502 |
| FKBP3     | -0.61705 | 0.295039 | -2.37171 | 0.02793  | 0.068304 | -3.96542 |
| TNFRSF13C | -0.68692 | 0.758338 | -2.37159 | 0.027936 | 0.068312 | -3.96563 |
| TWF2      | -0.53164 | 0.432889 | -2.37139 | 0.027948 | 0.068333 | -3.96602 |
| ZNF496    | 0.386958 | -0.22178 | 2.370928 | 0.027975 | 0.06839  | -3.96689 |
| LOC100506 | -0.44259 | -0.04715 | -2.35221 | 0.02968  | 0.071592 | -3.96696 |
| LINC00476 | -0.32342 | 0.043047 | -2.37071 | 0.027988 | 0.068413 | -3.9673  |
| BACH1     | -0.64346 | 0.182844 | -2.37044 | 0.028004 | 0.068443 | -3.96782 |
| FTSJ3     | -0.3813  | 0.466796 | -2.3697  | 0.028047 | 0.068533 | -3.96921 |
| SEMA6B    | -0.7648  | 0.052039 | -2.36969 | 0.028048 | 0.068533 | -3.96922 |
| MIXL1     | 0.367699 | -0.07573 | 2.369527 | 0.028057 | 0.068548 | -3.96953 |
| CCDC105   | 0.775794 | -0.17075 | 2.369119 | 0.028081 | 0.068598 | -3.9703  |
| SOX11     | -0.54574 | 0.059651 | -2.36869 | 0.028106 | 0.068648 | -3.97111 |
| C2orf73   | -0.59282 | 0.058687 | -2.36862 | 0.02811  | 0.068648 | -3.97124 |
| ZNF720    | -0.44556 | 0.543765 | -2.36859 | 0.028112 | 0.068648 | -3.9713  |
| ABO       | 1.054277 | -0.40098 | 2.368675 | 0.029336 | 0.070912 | -3.97168 |
| ATXN3L    | 0.861881 | -0.23932 | 2.36815  | 0.028138 | 0.068703 | -3.97213 |
| FOSL2     | -0.86634 | 0.9406   | -2.3677  | 0.028165 | 0.068759 | -3.97297 |
| MLL3      | -0.52594 | 0.240165 | -2.36759 | 0.028171 | 0.068759 | -3.97318 |
| FAM45A    | -0.96869 | 0.464899 | -2.36751 | 0.028176 | 0.068759 | -3.97334 |
| ZNHIT2    | 0.476936 | -0.10941 | 2.36747  | 0.028178 | 0.068759 | -3.97341 |
| TEC       | -0.62754 | 0.420983 | -2.36747 | 0.028179 | 0.068759 | -3.97342 |
| RNPC3     | -1.05805 | 0.366649 | -2.3672  | 0.028194 | 0.068788 | -3.97392 |
| ADAMTS4   | 1.196524 | -0.50243 | 2.333684 | 0.03804  | 0.086189 | -3.9748  |
| LOC158571 | -0.57059 | 0.401011 | -2.34782 | 0.029949 | 0.072083 | -3.9751  |
| MAP9      | 0.80724  | -0.1331  | 2.347585 | 0.029964 | 0.072091 | -3.97554 |
| HEATR7A   | -0.38553 | 0.419026 | -2.36626 | 0.02825  | 0.068915 | -3.97569 |
| GPHN      | 0.394441 | -0.30958 | 2.365852 | 0.028274 | 0.06896  | -3.97646 |
| GGPS1     | -0.39549 | -0.0046  | -2.36583 | 0.028275 | 0.06896  | -3.9765  |
| CHAT      | 0.489128 | -0.18549 | 2.36506  | 0.028321 | 0.069063 | -3.97795 |
| SERPINC1  | -0.85428 | 0.376426 | -2.36475 | 0.028339 | 0.069099 | -3.97854 |
| NLGN4X    | 0.793843 | -0.3622  | 2.347527 | 0.03137  | 0.07466  | -3.97911 |
| LRRC47    | 0.787848 | -0.09531 | 2.364245 | 0.028369 | 0.069163 | -3.97949 |
| FGF6      | -0.35348 | 0.222421 | -2.36367 | 0.028403 | 0.069222 | -3.98058 |
| SLC7A14   | -0.74162 | 0.199582 | -2.36366 | 0.028404 | 0.069222 | -3.9806  |
| ORC5      | -0.71924 | 0.489774 | -2.36346 | 0.028416 | 0.069242 | -3.98096 |
| SLC17A2   | -0.68841 | 0.244522 | -2.36333 | 0.028423 | 0.069245 | -3.98121 |
| MORC2     | 0.678756 | -0.11661 | 2.36272  | 0.02846  | 0.069315 | -3.98236 |
| GGTLC1    | -0.76499 | 0.417242 | -2.36258 | 0.028468 | 0.069326 | -3.98262 |
| YEATS4    | -0.76223 | 0.074279 | -2.36209 | 0.028497 | 0.069389 | -3.98355 |
| KDM6B     | -1.1144  | 0.920957 | -2.36192 | 0.028507 | 0.069394 | -3.98387 |
| MSL3P1    | -0.72887 | 0.434257 | -2.36187 | 0.02851  | 0.069394 | -3.98395 |
| PQLC1     | -0.47506 | 0.414015 | -2.36162 | 0.028525 | 0.069422 | -3.98442 |
| CRIPAK    | -0.7074  | 0.259254 | -2.36152 | 0.028531 | 0.069429 | -3.98462 |



|           |          |          |          |          |          |          |
|-----------|----------|----------|----------|----------|----------|----------|
| NTSR1     | -1.30873 | 1.11993  | -2.36143 | 0.028537 | 0.069433 | -3.98479 |
| TFAP2D    | 0.381258 | -0.14101 | 2.361216 | 0.029786 | 0.071804 | -3.98544 |
| NLGN1     | 0.33347  | -0.0979  | 2.360939 | 0.028566 | 0.069496 | -3.98571 |
| SF3B1     | -0.70118 | 0.237647 | -2.36087 | 0.02857  | 0.069497 | -3.98584 |
| NMNAT3    | 0.820707 | -0.20733 | 2.359424 | 0.028656 | 0.069699 | -3.98856 |
| CKAP2L    | -0.82072 | 0.288588 | -2.35919 | 0.02867  | 0.069724 | -3.98901 |
| OR4C1P    | -0.53381 | 0.242024 | -2.35893 | 0.028686 | 0.069753 | -3.98949 |
| FBLL1     | -0.61603 | -0.06768 | -2.35882 | 0.028692 | 0.069761 | -3.9897  |
| C1QTNF7   | 0.45621  | -0.23077 | 2.358499 | 0.028712 | 0.069799 | -3.9903  |
| GNL3      | -0.82446 | 0.487663 | -2.35811 | 0.028735 | 0.069837 | -3.99103 |
| CIITA     | -1.00115 | 1.228028 | -2.35806 | 0.028738 | 0.069837 | -3.99113 |
| TRAFD1    | -0.64126 | 0.648622 | -2.35802 | 0.02874  | 0.069837 | -3.9912  |
| WDR74     | 0.579658 | -0.21911 | 2.357999 | 0.028742 | 0.069837 | -3.99124 |
| DUS2L     | -0.47034 | 0.485484 | -2.35793 | 0.028746 | 0.069838 | -3.99137 |
| ANLN      | -1.49318 | 0.783874 | -2.35785 | 0.028751 | 0.069842 | -3.99153 |
| PLEKHG3   | 0.616165 | -0.08067 | 2.357747 | 0.028757 | 0.069848 | -3.99172 |
| ZBTB37    | -0.52252 | 0.334626 | -2.35756 | 0.028768 | 0.069849 | -3.99208 |
| NEK6      | 0.370082 | -0.36195 | 2.357553 | 0.028769 | 0.069849 | -3.99208 |
| FAM89B    | -0.36441 | 0.3152   | -2.35748 | 0.028773 | 0.069849 | -3.99221 |
| LOC100133 | -0.58856 | 0.325518 | -2.35746 | 0.028774 | 0.069849 | -3.99225 |
| NUDT8     | 0.713382 | -0.29447 | 2.357439 | 0.028775 | 0.069849 | -3.9923  |
| SNPH      | 0.702049 | -0.17243 | 2.357225 | 0.028788 | 0.069872 | -3.9927  |
| OR6A2     | -0.49063 | 0.14662  | -2.35698 | 0.028803 | 0.069898 | -3.99316 |
| LOC100501 | 0.613074 | -0.38504 | 2.356929 | 0.028806 | 0.069898 | -3.99326 |
| IKZF2     | 0.474161 | -0.40782 | 2.356858 | 0.02881  | 0.0699   | -3.99339 |
| VPS13B    | -0.67844 | 0.496704 | -2.35665 | 0.028823 | 0.069921 | -3.99378 |
| DENND5A   | -0.51744 | 0.319659 | -2.35641 | 0.028837 | 0.069948 | -3.99423 |
| ENTPD3    | -0.29735 | 0.173238 | -2.35564 | 0.028883 | 0.070051 | -3.99567 |
| FAM179B   | -0.27786 | 0.055572 | -2.35541 | 0.028898 | 0.070077 | -3.99612 |
| ANO3      | -0.65882 | 0.084335 | -2.33645 | 0.030658 | 0.073366 | -3.99614 |
| MFSD5     | -0.29249 | 0.231525 | -2.35505 | 0.028919 | 0.070119 | -3.99679 |
| SLC25A42  | 0.490091 | -0.11756 | 2.354635 | 0.028944 | 0.070157 | -3.99757 |
| FAM199X   | -0.88395 | 0.307155 | -2.35463 | 0.028945 | 0.070157 | -3.99758 |
| MRPL28    | -0.33722 | 0.192467 | -2.35405 | 0.02898  | 0.070232 | -3.99866 |
| RGMA      | 0.439984 | -0.30587 | 2.353835 | 0.028993 | 0.070255 | -3.99907 |
| LOC100501 | 1.155553 | -0.43293 | 2.283023 | 0.035682 | 0.082166 | -3.99924 |
| LY86      | 0.843699 | -0.31254 | 2.353382 | 0.02902  | 0.070313 | -3.99992 |
| NOTCH1    | -0.84488 | 0.748293 | -2.35309 | 0.029038 | 0.070347 | -4.00047 |
| LIFR      | -0.59768 | 0.066351 | -2.35277 | 0.029057 | 0.070378 | -4.00107 |
| PRPF40B   | 0.606781 | -0.20067 | 2.352694 | 0.029062 | 0.070378 | -4.00122 |
| LCN12     | 0.321177 | -0.20207 | 2.352641 | 0.029065 | 0.070378 | -4.00131 |
| SLMO1     | -0.48257 | 0.386075 | -2.35228 | 0.029087 | 0.070422 | -4.00199 |
| CD248     | 0.739399 | -0.30466 | 2.35159  | 0.029129 | 0.070515 | -4.00329 |
| HAPLN1    | -0.6507  | 0.200539 | -2.35157 | 0.029718 | 0.071677 | -4.00355 |
| RANBP3    | -0.6361  | 0.61939  | -2.35095 | 0.029168 | 0.070593 | -4.00448 |
| ABCA1     | -0.68696 | 0.139567 | -2.35089 | 0.029171 | 0.070593 | -4.0046  |
| AMPH      | -0.86564 | 0.308694 | -2.35089 | 0.029172 | 0.070593 | -4.00461 |

|           |          |          |          |          |          |          |
|-----------|----------|----------|----------|----------|----------|----------|
| SIGLECP3  | 0.706019 | -0.43612 | 2.332432 | 0.031582 | 0.074998 | -4.00518 |
| PRDM7     | -0.42621 | 0.087389 | -2.35033 | 0.029205 | 0.070666 | -4.00565 |
| CCDC27    | 0.675396 | -0.41568 | 2.331689 | 0.031629 | 0.075075 | -4.00653 |
| PDCD11    | 0.663267 | -0.17061 | 2.349693 | 0.029244 | 0.070751 | -4.00685 |
| CUBN      | -0.42498 | 0.375006 | -2.34948 | 0.029257 | 0.070774 | -4.00725 |
| TMEM129   | 0.22089  | -0.04418 | 2.349103 | 0.02928  | 0.070821 | -4.00796 |
| KLC1      | -1.43616 | 1.275295 | -2.34871 | 0.029304 | 0.07087  | -4.00869 |
| LIAS      | -0.44658 | 0.200426 | -2.34853 | 0.029315 | 0.070888 | -4.00903 |
| PPP2R2A   | -0.60725 | 0.354245 | -2.34837 | 0.029325 | 0.070903 | -4.00934 |
| SLCO1B1   | 0.931093 | -0.14457 | 2.30605  | 0.033315 | 0.077954 | -4.00951 |
| SLC2A10   | 0.408601 | -0.33456 | 2.3482   | 0.029336 | 0.070912 | -4.00965 |
| FLJ40453  | -0.73497 | 0.067611 | -2.34591 | 0.032315 | 0.076322 | -4.00973 |
| FLJ20021  | 0.608227 | -0.46525 | 2.347427 | 0.029383 | 0.071016 | -4.0111  |
| GALNTL1   | 0.411665 | -0.35214 | 2.347189 | 0.029397 | 0.071034 | -4.01155 |
| CUX1      | -0.8406  | 0.655353 | -2.34676 | 0.029424 | 0.071089 | -4.01235 |
| CDH26     | -0.61621 | 0.486115 | -2.34634 | 0.02945  | 0.071143 | -4.01315 |
| PKN2      | 0.628876 | -0.5777  | 2.345387 | 0.029508 | 0.071266 | -4.01493 |
| MTRF1L    | -0.63889 | 0.284368 | -2.34531 | 0.029513 | 0.071269 | -4.01507 |
| TMEM144   | -0.74628 | 0.36124  | -2.34505 | 0.029529 | 0.071298 | -4.01555 |
| CTSW      | 1.030465 | -0.16791 | 2.344888 | 0.029539 | 0.071314 | -4.01586 |
| NRN1      | 0.956282 | -0.35643 | 2.344012 | 0.029593 | 0.071436 | -4.01751 |
| ANKRD26   | -0.43288 | 0.029515 | -2.3436  | 0.029619 | 0.07148  | -4.01829 |
| SH2B1     | -0.50184 | 0.459359 | -2.34351 | 0.029624 | 0.071484 | -4.01844 |
| HYAL4     | -0.58052 | -0.23222 | -2.34318 | 0.029644 | 0.071524 | -4.01906 |
| OGN       | 0.800785 | -0.33617 | 2.300598 | 0.033685 | 0.078573 | -4.01938 |
| RYR1      | 0.64519  | 0.067706 | 2.342626 | 0.029678 | 0.071592 | -4.0201  |
| IL10RA    | 0.427169 | -0.21371 | 2.341427 | 0.029753 | 0.071742 | -4.02235 |
| MAGEC2    | 0.461271 | -0.21753 | 2.322101 | 0.031576 | 0.074995 | -4.02262 |
| EFCAB11   | -0.70148 | 0.589554 | -2.3408  | 0.030385 | 0.072846 | -4.02355 |
| SERAC1    | -1.51143 | 1.10479  | -2.34071 | 0.029797 | 0.071823 | -4.0237  |
| JMJD5     | 0.509621 | -0.23506 | 2.340042 | 0.029839 | 0.071914 | -4.02494 |
| NMT1      | -0.40798 | 0.28747  | -2.33997 | 0.029843 | 0.071916 | -4.02509 |
| MASTL     | -0.86765 | 0.434686 | -2.33961 | 0.029865 | 0.07196  | -4.02575 |
| TNNI2     | -0.67726 | 0.33792  | -2.33919 | 0.029891 | 0.072014 | -4.02653 |
| IL22RA1   | 0.631023 | -0.10735 | 2.339101 | 0.030492 | 0.073039 | -4.0267  |
| ENO1      | -0.47941 | 0.301059 | -2.33901 | 0.029903 | 0.072032 | -4.02687 |
| CCDC50    | -0.56911 | 0.583129 | -2.33889 | 0.02991  | 0.072034 | -4.0271  |
| EFCAB7    | -0.99507 | 0.343238 | -2.33885 | 0.029913 | 0.072034 | -4.02718 |
| PAX7      | 0.447595 | -0.2994  | 2.338731 | 0.02992  | 0.072034 | -4.0274  |
| LOC100288 | -0.43269 | 0.145752 | -2.33871 | 0.029922 | 0.072034 | -4.02745 |
| PRDM4     | -0.26165 | 0.057583 | -2.33862 | 0.029927 | 0.072038 | -4.0276  |
| MRPS27    | 0.572535 | -0.36876 | 2.338082 | 0.029961 | 0.072091 | -4.02861 |
| CD8A      | 1.216625 | -0.75839 | 2.338048 | 0.029963 | 0.072091 | -4.02868 |
| FAT1      | -0.31431 | 0.147868 | -2.33786 | 0.029975 | 0.072109 | -4.02904 |
| AIF1L     | -0.62077 | 0.470664 | -2.33704 | 0.030026 | 0.072222 | -4.03056 |
| RNASE3    | -1.11529 | 0.560058 | -2.33669 | 0.030048 | 0.072262 | -4.03122 |
| LPAR3     | -0.6611  | -0.10877 | -2.31813 | 0.032511 | 0.076685 | -4.03127 |

|           |          |          |          |          |          |          |
|-----------|----------|----------|----------|----------|----------|----------|
| SERPING1  | -1.33729 | 1.36187  | -2.33666 | 0.03005  | 0.072262 | -4.03128 |
| GPHA2     | 0.355718 | -0.32509 | 2.336224 | 0.030077 | 0.072314 | -4.03209 |
| TRHR      | -0.44155 | 0.142051 | -2.3362  | 0.030079 | 0.072314 | -4.03214 |
| ADAMTS1   | 0.74242  | -0.13323 | 2.316858 | 0.031918 | 0.075622 | -4.03228 |
| GPR55     | 0.402788 | -0.3791  | 2.335964 | 0.030093 | 0.072338 | -4.03258 |
| NDUFB4    | -0.40502 | 0.252155 | -2.3359  | 0.030097 | 0.072338 | -4.03269 |
| STGC3     | 0.410701 | -0.14438 | 2.33586  | 0.0301   | 0.072338 | -4.03277 |
| CCDC146   | -0.70596 | 0.505378 | -2.33574 | 0.030107 | 0.07234  | -4.033   |
| HS3ST3B1  | -0.66866 | -0.08651 | -2.33568 | 0.030111 | 0.07234  | -4.03311 |
| FLJ23152  | 0.428298 | -0.24081 | 2.335668 | 0.030112 | 0.07234  | -4.03313 |
| KIF3C     | -0.68501 | 0.934838 | -2.33526 | 0.030137 | 0.07237  | -4.03389 |
| ICAM3     | 0.491695 | -0.15446 | 2.335258 | 0.030137 | 0.07237  | -4.0339  |
| LOC100125 | -1.0513  | 0.512212 | -2.33524 | 0.030139 | 0.07237  | -4.03394 |
| DTNA      | 0.541989 | -0.22773 | 2.335236 | 0.030139 | 0.07237  | -4.03394 |
| PIK3CG    | -0.86976 | 0.553532 | -2.33492 | 0.030159 | 0.072409 | -4.03454 |
| KHDRBS3   | 0.40056  | -0.28135 | 2.334678 | 0.030174 | 0.072436 | -4.03498 |
| NPVF      | 0.510632 | -0.23663 | 2.334471 | 0.030187 | 0.072458 | -4.03537 |
| USP4      | -0.6086  | 0.57847  | -2.33438 | 0.030192 | 0.072463 | -4.03554 |
| DSCAM-AS  | -0.41735 | 0.260005 | -2.33386 | 0.030225 | 0.072532 | -4.03651 |
| EPHX4     | 0.409964 | -0.32537 | 2.333393 | 0.030852 | 0.073667 | -4.03728 |
| CFI       | -0.59142 | 0.168424 | -2.33343 | 0.030252 | 0.072589 | -4.03732 |
| DIO3      | 0.406769 | -0.30505 | 2.332789 | 0.031559 | 0.074971 | -4.03767 |
| CCNA1     | -0.47214 | 0.095868 | -2.33275 | 0.030893 | 0.073741 | -4.03848 |
| SEC22A    | -0.56047 | 0.012773 | -2.33258 | 0.030306 | 0.072709 | -4.03891 |
| SYNE1     | -0.51709 | 0.086199 | -2.33246 | 0.030313 | 0.072717 | -4.03912 |
| TAF9      | -0.59273 | 0.263295 | -2.33229 | 0.030324 | 0.072734 | -4.03944 |
| SLC29A1   | 0.908835 | -0.19597 | 2.332012 | 0.030342 | 0.072768 | -4.03997 |
| AKAP1     | 0.714228 | -0.41204 | 2.331816 | 0.030354 | 0.072788 | -4.04033 |
| GIN5      | -0.58664 | 0.470292 | -2.33152 | 0.030372 | 0.072824 | -4.04088 |
| AKAP5     | 0.47716  | 0.059606 | 2.331164 | 0.030395 | 0.072861 | -4.04155 |
| USP15     | -0.93727 | 0.451998 | -2.3304  | 0.030444 | 0.072968 | -4.04299 |
| DNAJC4    | -0.40885 | 0.213213 | -2.33011 | 0.030462 | 0.073003 | -4.04352 |
| ADAM33    | 0.355677 | -0.17109 | 2.329928 | 0.030473 | 0.073014 | -4.04386 |
| LOC149355 | 0.485386 | -0.12195 | 2.329918 | 0.030474 | 0.073014 | -4.04388 |
| ACRBP     | 0.852595 | -0.08779 | 2.329717 | 0.030487 | 0.073036 | -4.04426 |
| HIST2H2BC | -0.37781 | 0.305715 | -2.32956 | 0.030497 | 0.073042 | -4.04456 |
| NFYB      | -0.75657 | 0.066962 | -2.32918 | 0.030521 | 0.073081 | -4.04526 |
| ADH1C     | 0.396816 | -0.23233 | 2.329179 | 0.030521 | 0.073081 | -4.04526 |
| DAAM2     | -1.40765 | 0.336154 | -2.32909 | 0.030527 | 0.073086 | -4.04543 |
| PPT1      | -0.72737 | 0.383069 | -2.3285  | 0.030564 | 0.073167 | -4.04653 |
| DIDO1     | -1.35531 | 0.916143 | -2.32757 | 0.030623 | 0.073291 | -4.04827 |
| PAPOLG    | -0.72821 | 0.134061 | -2.32657 | 0.030687 | 0.073407 | -4.05014 |
| FAM195A   | 0.460749 | -0.24817 | 2.326513 | 0.03069  | 0.073407 | -4.05024 |
| WNT2      | 1.111915 | -1.04349 | 2.179745 | 0.050163 | 0.10658  | -4.05026 |
| UBAP1L    | 0.348333 | -0.08229 | 2.326227 | 0.030709 | 0.073442 | -4.05077 |
| CYP27B1   | -0.52491 | 0.221876 | -2.32586 | 0.030732 | 0.073488 | -4.05146 |
| MST1      | 0.507896 | -0.36364 | 2.325726 | 0.030741 | 0.073491 | -4.05171 |

|           |          |          |          |          |          |          |
|-----------|----------|----------|----------|----------|----------|----------|
| SHANK2    | 0.562856 | -0.6844  | 2.307276 | 0.034    | 0.079111 | -4.05172 |
| VPS4B     | -1.26428 | 0.75167  | -2.32528 | 0.030769 | 0.073549 | -4.05254 |
| PCDHB9    | 0.612064 | -0.77828 | 2.30681  | 0.034032 | 0.079166 | -4.05255 |
| RSBN1L    | -0.53546 | 0.041472 | -2.32523 | 0.030772 | 0.073549 | -4.05263 |
| LTB       | 0.74416  | -0.18695 | 2.325032 | 0.030785 | 0.07357  | -4.053   |
| NUPL1     | -0.86338 | 0.211535 | -2.32478 | 0.030801 | 0.073599 | -4.05347 |
| SNHG11    | -0.39203 | 0.3679   | -2.32463 | 0.030811 | 0.073613 | -4.05375 |
| SMPD4     | -0.74338 | 0.745289 | -2.32451 | 0.030819 | 0.073621 | -4.05398 |
| STK24     | -0.5891  | 0.676726 | -2.32447 | 0.030821 | 0.073621 | -4.05406 |
| HHLA2     | -0.95167 | 0.484232 | -2.32422 | 0.030837 | 0.073649 | -4.05451 |
| FAM154B   | 0.538128 | -0.11414 | 2.324102 | 0.030845 | 0.073659 | -4.05474 |
| ATP8B5P   | 0.856039 | -0.29821 | 2.30411  | 0.032763 | 0.077097 | -4.0557  |
| ESYT1     | 0.724859 | -0.14151 | 2.323445 | 0.030887 | 0.073741 | -4.05597 |
| SLC25A38  | 0.576404 | -0.22526 | 2.32333  | 0.030894 | 0.073741 | -4.05618 |
| ANXA8L2   | -1.03671 | 0.311257 | -2.32308 | 0.03091  | 0.07377  | -4.05665 |
| PPAP2B    | -0.52947 | 0.561382 | -2.32242 | 0.030953 | 0.073862 | -4.05788 |
| GRIK4     | -0.56872 | -0.13307 | -2.32059 | 0.033108 | 0.077617 | -4.05812 |
| B3GALT1   | -0.47098 | 0.068135 | -2.32181 | 0.031595 | 0.075022 | -4.05871 |
| LOC28434  | -0.72393 | 0.016665 | -2.30299 | 0.033522 | 0.078325 | -4.05879 |
| HIST1H2AM | -0.79088 | 0.943895 | -2.32172 | 0.030998 | 0.073961 | -4.05919 |
| TTY5      | 0.541064 | -0.38068 | 2.318157 | 0.034131 | 0.07935  | -4.0593  |
| ZNF786    | -0.52544 | 0.451543 | -2.32161 | 0.031005 | 0.073969 | -4.05939 |
| CHRNA4    | 0.464386 | -0.42967 | 2.321302 | 0.031025 | 0.074007 | -4.05996 |
| CCDC76    | 0.682567 | -0.14647 | 2.321214 | 0.03103  | 0.074012 | -4.06013 |
| PHLDA2    | 1.133594 | -0.67357 | 2.250415 | 0.038971 | 0.08779  | -4.06065 |
| PLK1S1    | -0.38282 | 0.260053 | -2.32079 | 0.031058 | 0.074068 | -4.06092 |
| MAP3K4    | 0.425016 | -0.10273 | 2.320248 | 0.031093 | 0.074142 | -4.06193 |
| COL5A3    | 0.53079  | -0.3026  | 2.319665 | 0.03113  | 0.07422  | -4.06301 |
| WDR11     | -0.44507 | 0.295731 | -2.31963 | 0.031133 | 0.07422  | -4.06308 |
| RSPH10B   | 0.873281 | -0.39764 | 2.299186 | 0.033094 | 0.077603 | -4.06472 |
| UBE2Q2P1  | 0.637499 | -0.42818 | 2.318734 | 0.03119  | 0.074348 | -4.06475 |
| RAD51AP1  | -1.34309 | 0.542002 | -2.29958 | 0.033754 | 0.078679 | -4.06498 |
| PARP1     | 0.630153 | -0.17673 | 2.318482 | 0.031207 | 0.074378 | -4.06522 |
| GPR1      | -0.89372 | 0.413385 | -2.31842 | 0.031211 | 0.074379 | -4.06533 |
| CX3CL1    | -0.27739 | 0.179549 | -2.31809 | 0.031232 | 0.07442  | -4.06594 |
| UBR4      | -0.51798 | 0.496199 | -2.31776 | 0.031253 | 0.074462 | -4.06655 |
| MTMR10    | -0.67452 | 0.062674 | -2.31756 | 0.031267 | 0.074485 | -4.06694 |
| DSCR9     | -0.35131 | 0.041681 | -2.31713 | 0.031295 | 0.074542 | -4.06774 |
| IFT80     | -1.19995 | 0.524091 | -2.31681 | 0.031315 | 0.074583 | -4.06834 |
| TRPV5     | 0.533919 | -0.45539 | 2.316577 | 0.03133  | 0.074604 | -4.06877 |
| MDK       | 0.538767 | -0.29061 | 2.316555 | 0.031332 | 0.074604 | -4.06881 |
| LGALS12   | 0.776637 | -0.40735 | 2.316312 | 0.031348 | 0.074632 | -4.06926 |
| ZNF730    | 0.461627 | -0.03899 | 2.316066 | 0.03197  | 0.0757   | -4.0693  |
| ZNF592    | 0.366283 | -0.12245 | 2.316169 | 0.031357 | 0.074637 | -4.06953 |
| TOMM34    | -0.72531 | 0.949916 | -2.31617 | 0.031357 | 0.074637 | -4.06953 |
| KSR2      | -0.69339 | 0.16487  | -2.3157  | 0.031387 | 0.074691 | -4.0704  |
| C8orf75   | -0.48454 | -0.07038 | -2.31517 | 0.031422 | 0.074764 | -4.07138 |

|           |          |          |          |          |          |          |
|-----------|----------|----------|----------|----------|----------|----------|
| CDH17     | -0.34247 | 0.049263 | -2.29545 | 0.033348 | 0.078012 | -4.07157 |
| CYP11A1   | -0.37154 | 0.303571 | -2.31498 | 0.031434 | 0.074784 | -4.07173 |
| HIST3H2A  | -0.88124 | 0.68264  | -2.31492 | 0.031438 | 0.074784 | -4.07184 |
| ZNF283    | -0.56307 | 0.204507 | -2.31467 | 0.031455 | 0.074815 | -4.07232 |
| ERGIC3    | -0.34712 | 0.318812 | -2.3146  | 0.031459 | 0.074816 | -4.07244 |
| H3F3C     | -0.61756 | 0.464082 | -2.31428 | 0.03148  | 0.074857 | -4.07305 |
| FTSJD2    | -0.52728 | 0.434136 | -2.31419 | 0.031486 | 0.074861 | -4.0732  |
| SFRP1     | 0.504416 | -0.40967 | 2.314129 | 0.03149  | 0.074862 | -4.07332 |
| HABP4     | 0.549999 | -0.15427 | 2.313962 | 0.031501 | 0.074879 | -4.07363 |
| OR3A1     | -0.47463 | 0.148032 | -2.31281 | 0.032863 | 0.077209 | -4.07419 |
| TLCD1     | 0.421063 | -0.33524 | 2.313453 | 0.031534 | 0.074938 | -4.07458 |
| FAM122A   | -0.37418 | 0.143351 | -2.3134  | 0.031537 | 0.074938 | -4.07467 |
| PYGM      | -0.88246 | 1.126491 | -2.31319 | 0.031551 | 0.074963 | -4.07507 |
| FANCI     | -0.62693 | 0.571342 | -2.31285 | 0.031574 | 0.074995 | -4.0757  |
| MYH1      | 0.546939 | -0.15616 | 2.312035 | 0.032235 | 0.076199 | -4.07673 |
| SCG5      | -0.67929 | 0.428648 | -2.31212 | 0.031622 | 0.07507  | -4.07707 |
| USF1      | -0.98689 | 1.028431 | -2.31209 | 0.031623 | 0.07507  | -4.07712 |
| FXC1      | -0.64737 | 0.363283 | -2.31186 | 0.031638 | 0.075088 | -4.07755 |
| C20orf152 | -0.50149 | 0.102413 | -2.31069 | 0.031715 | 0.075255 | -4.07972 |
| ARPC5     | -0.62976 | 0.271214 | -2.31067 | 0.031717 | 0.075255 | -4.07976 |
| HSD3B1    | -0.76898 | 0.276469 | -2.31043 | 0.031733 | 0.075284 | -4.08021 |
| TIAM2     | 1.201956 | -0.68228 | 2.310292 | 0.031741 | 0.075296 | -4.08046 |
| TMBIM6    | -0.41042 | 0.143883 | -2.31018 | 0.031749 | 0.075305 | -4.08068 |
| SUV420H1  | -0.34809 | 0.234091 | -2.30998 | 0.031762 | 0.075326 | -4.08104 |
| INHBC     | 0.444991 | -0.52721 | 2.309467 | 0.031796 | 0.075397 | -4.082   |
| OR1G1     | 0.747525 | -0.43895 | 2.30843  | 0.033156 | 0.0777   | -4.08217 |
| TANK      | -0.97874 | 0.443823 | -2.30915 | 0.031817 | 0.075438 | -4.08259 |
| C14orf81  | -0.93179 | 0.34822  | -2.30884 | 0.031837 | 0.075477 | -4.08316 |
| AGER      | -0.46435 | 0.49862  | -2.30855 | 0.031856 | 0.075512 | -4.08369 |
| TAS2R43   | -0.36492 | 0.070125 | -2.30759 | 0.033212 | 0.077795 | -4.0837  |
| LOC400550 | -0.72021 | 0.245618 | -2.30804 | 0.03189  | 0.075583 | -4.08464 |
| AADAC     | -0.47978 | -0.03384 | -2.30702 | 0.03325  | 0.077872 | -4.08474 |
| FLJ20712  | -0.57661 | -0.10814 | -2.30789 | 0.0319   | 0.075592 | -4.08493 |
| HERC2     | -0.47069 | 0.531778 | -2.30787 | 0.031901 | 0.075592 | -4.08496 |
| C9orf139  | -0.7432  | 0.519929 | -2.30749 | 0.031926 | 0.075633 | -4.08567 |
| LOC643833 | 0.587082 | -0.27068 | 2.30698  | 0.032571 | 0.076793 | -4.08604 |
| BAI1      | 0.422091 | -0.25491 | 2.307283 | 0.03194  | 0.075648 | -4.08605 |
| CCDC96    | 0.456629 | -0.21419 | 2.307282 | 0.03194  | 0.075648 | -4.08606 |
| FAM18B1   | -0.84422 | 0.314698 | -2.30622 | 0.033304 | 0.077951 | -4.08619 |
| SRRM2     | 0.530629 | -0.31471 | 2.307161 | 0.031948 | 0.075657 | -4.08628 |
| LINC00032 | 0.444022 | -0.09892 | 2.306425 | 0.032608 | 0.076833 | -4.08706 |
| SRGAP2P1  | -0.64582 | 0.178482 | -2.28678 | 0.033944 | 0.079009 | -4.08742 |
| TIMM22    | -0.34814 | 0.414419 | -2.30644 | 0.031996 | 0.075752 | -4.08762 |
| RGPD5     | -0.76623 | 0.698254 | -2.30628 | 0.032006 | 0.075761 | -4.08792 |
| IPP       | -0.63478 | 0.340552 | -2.30622 | 0.03201  | 0.075761 | -4.08802 |
| DCX       | 0.475062 | -0.21999 | 2.306209 | 0.032011 | 0.075761 | -4.08805 |
| SLC16A13  | -0.50807 | 0.452387 | -2.30555 | 0.032055 | 0.075847 | -4.08927 |

|           |          |          |          |          |          |          |
|-----------|----------|----------|----------|----------|----------|----------|
| COL6A2    | 0.952241 | -0.05378 | 2.305501 | 0.032058 | 0.075847 | -4.08936 |
| HSD17B10  | 0.421199 | -0.18232 | 2.305488 | 0.032059 | 0.075847 | -4.08939 |
| CASC5     | 0.556011 | -0.09853 | 2.30467  | 0.032113 | 0.075966 | -4.09091 |
| ADAMTS1C  | 0.862546 | -0.19012 | 2.303798 | 0.032171 | 0.076094 | -4.09253 |
| CCRL2     | -0.82587 | 0.493302 | -2.30363 | 0.032183 | 0.076112 | -4.09284 |
| MCHR1     | -0.75768 | -0.12716 | -2.3035  | 0.032191 | 0.076122 | -4.09307 |
| SLC39A4   | -0.52268 | 0.592639 | -2.30341 | 0.032197 | 0.076127 | -4.09324 |
| KBTBD7    | -0.73169 | 0.504008 | -2.30304 | 0.032835 | 0.077188 | -4.09329 |
| CTSO      | -0.90876 | 0.18402  | -2.28342 | 0.034178 | 0.079413 | -4.09357 |
| SMEK1     | -0.82819 | 0.578556 | -2.30321 | 0.032211 | 0.07615  | -4.09362 |
| DPP10     | -0.82279 | 0.298262 | -2.30256 | 0.032254 | 0.076229 | -4.09483 |
| NPHS2     | -0.5064  | 0.224377 | -2.30254 | 0.032255 | 0.076229 | -4.09486 |
| ADCY4     | -0.64353 | 0.703498 | -2.30239 | 0.032265 | 0.076242 | -4.09513 |
| KCNV2     | 0.442457 | -0.3409  | 2.302133 | 0.032283 | 0.076274 | -4.09562 |
| SEC61A1   | 0.234952 | -0.12851 | 2.30178  | 0.032306 | 0.076321 | -4.09627 |
| GCH1      | -1.31447 | 0.570116 | -2.30165 | 0.032315 | 0.076322 | -4.09651 |
| NPAS2     | 0.715277 | -0.07492 | 2.3016   | 0.032318 | 0.076322 | -4.09661 |
| PEX7      | -0.34481 | -0.04825 | -2.30145 | 0.032328 | 0.076337 | -4.09689 |
| ZNF48     | 0.642881 | -0.17498 | 2.30085  | 0.032368 | 0.076422 | -4.098   |
| KIAA1731  | -0.59299 | 0.245136 | -2.30079 | 0.032373 | 0.076423 | -4.09811 |
| FMR1      | -0.63153 | 0.297441 | -2.30064 | 0.032383 | 0.076437 | -4.09839 |
| ZNF532    | -0.32088 | 0.046696 | -2.30048 | 0.032393 | 0.076453 | -4.09869 |
| BRD7      | -0.378   | 0.225208 | -2.29921 | 0.032479 | 0.076645 | -4.10104 |
| OR4A15    | 0.494582 | -0.41193 | 2.298981 | 0.032494 | 0.076672 | -4.10146 |
| EPB41L4B  | -0.54635 | 0.11928  | -2.29892 | 0.032498 | 0.076672 | -4.10157 |
| SQSTM1    | 0.427705 | 0.215877 | 2.298735 | 0.03251  | 0.076685 | -4.10192 |
| PRDM13    | -0.82316 | 0.168004 | -2.29863 | 0.032517 | 0.07669  | -4.10211 |
| HAS1      | 0.762611 | -0.61817 | 2.278541 | 0.036889 | 0.084301 | -4.10258 |
| ARHGEF26  | -0.34232 | 0.152862 | -2.29789 | 0.032567 | 0.076793 | -4.10348 |
| ARHGAP20  | 0.582278 | -0.18783 | 2.297809 | 0.032573 | 0.076793 | -4.10364 |
| ZNF439    | -0.92451 | 0.586676 | -2.29752 | 0.032592 | 0.076827 | -4.10418 |
| CHMP4C    | 0.609906 | -0.19101 | 2.29748  | 0.032595 | 0.076827 | -4.10425 |
| CDH8      | 0.30365  | -0.12144 | 2.297405 | 0.0326   | 0.07683  | -4.10439 |
| EGFL8     | 0.712551 | -0.24511 | 2.297269 | 0.032609 | 0.076833 | -4.10464 |
| LRRC37A3  | -1.34911 | 1.301535 | -2.29688 | 0.032635 | 0.076877 | -4.10536 |
| PMS2P1    | -0.33248 | 0.26415  | -2.29657 | 0.032657 | 0.076917 | -4.10594 |
| UCHL1     | -1.12786 | 1.529737 | -2.29646 | 0.032664 | 0.076917 | -4.10613 |
| TNFRSF25  | 1.12875  | -0.36642 | 2.296422 | 0.032666 | 0.076917 | -4.10621 |
| SERPINB7  | -0.3142  | 0.19264  | -2.29639 | 0.032668 | 0.076917 | -4.10626 |
| TMEM178   | 0.788891 | -0.60216 | 2.221765 | 0.040281 | 0.090222 | -4.10697 |
| SLC18A2   | 0.761756 | -0.502   | 2.276315 | 0.035375 | 0.081628 | -4.10706 |
| SPAG5-AS1 | -0.49457 | 0.348529 | -2.29521 | 0.032748 | 0.077096 | -4.10845 |
| PSPN      | 0.375763 | -0.10306 | 2.295149 | 0.032752 | 0.077096 | -4.10857 |
| SRRM4     | 0.472711 | -0.46168 | 2.294995 | 0.032763 | 0.077097 | -4.10885 |
| CBR3      | -0.72669 | 0.209078 | -2.29497 | 0.032764 | 0.077097 | -4.1089  |
| SHC2      | 0.256428 | -0.07712 | 2.29479  | 0.032777 | 0.077117 | -4.10923 |
| TMX1      | -0.86749 | -0.00952 | -2.29473 | 0.032781 | 0.077117 | -4.10934 |

|           |          |          |          |          |          |          |
|-----------|----------|----------|----------|----------|----------|----------|
| LOC729887 | -0.62826 | 0.444659 | -2.29452 | 0.032795 | 0.07714  | -4.10972 |
| KLRF2     | 0.483562 | -0.08406 | 2.294419 | 0.032802 | 0.077148 | -4.10992 |
| GNPDA1    | -0.46257 | 0.26418  | -2.29436 | 0.032806 | 0.077148 | -4.11003 |
| EXOSC9    | -0.51758 | 0.490422 | -2.29424 | 0.032814 | 0.077158 | -4.11025 |
| ITIH3     | -0.32302 | 0.021836 | -2.29399 | 0.032831 | 0.077188 | -4.11071 |
| UBL7      | 0.426792 | -0.03584 | 2.2938   | 0.032844 | 0.077196 | -4.11106 |
| CLCN2     | -0.35324 | 0.411387 | -2.29377 | 0.032846 | 0.077196 | -4.11111 |
| P2RY1     | 0.443392 | -0.15633 | 2.273699 | 0.034862 | 0.080704 | -4.11128 |
| INTS4     | -0.58255 | 0.379668 | -2.29365 | 0.032854 | 0.077205 | -4.11133 |
| PPM1D     | -0.47387 | 0.247128 | -2.29355 | 0.032861 | 0.077209 | -4.11153 |
| SPINK13   | 0.665299 | -0.21097 | 2.292553 | 0.033546 | 0.078363 | -4.11255 |
| C11orf31  | -0.63528 | 0.200932 | -2.29299 | 0.032899 | 0.07727  | -4.11257 |
| MTG1      | -0.5274  | 0.594855 | -2.29296 | 0.032901 | 0.07727  | -4.11262 |
| APEX2     | -0.26657 | 0.319848 | -2.29274 | 0.032916 | 0.077295 | -4.11302 |
| TBL1XR1   | -0.55919 | -0.19461 | -2.29251 | 0.032932 | 0.077323 | -4.11345 |
| NHLH2     | 0.544335 | -0.47255 | 2.292364 | 0.032942 | 0.077337 | -4.11372 |
| C1orf182  | 0.520438 | -0.3541  | 2.292053 | 0.032963 | 0.077378 | -4.1143  |
| ASS1      | -0.57305 | 0.392701 | -2.2917  | 0.032987 | 0.077424 | -4.11495 |
| LPPR3     | 0.806699 | -0.04137 | 2.291504 | 0.033    | 0.077447 | -4.11531 |
| BCAP31    | -0.41745 | 0.207228 | -2.29143 | 0.033005 | 0.077449 | -4.11545 |
| IL1RAP    | -1.15511 | -0.14565 | -2.29091 | 0.033041 | 0.077523 | -4.11641 |
| ZBTB17    | -0.27411 | 0.240101 | -2.29063 | 0.03306  | 0.077559 | -4.11693 |
| GLYR1     | -0.39256 | 0.321145 | -2.29034 | 0.033079 | 0.077596 | -4.11746 |
| DES       | 0.631804 | -0.36968 | 2.289813 | 0.033735 | 0.078643 | -4.11757 |
| PHC3      | -0.44246 | 0.30634  | -2.29025 | 0.033085 | 0.077601 | -4.11763 |
| TMEM59    | -0.6159  | 0.124731 | -2.29018 | 0.033091 | 0.077603 | -4.11777 |
| STMN1     | -0.81762 | 0.589896 | -2.29007 | 0.033098 | 0.077603 | -4.11797 |
| CD97      | -0.72214 | 0.680538 | -2.28942 | 0.033143 | 0.077688 | -4.11917 |
| PRICKLE2  | -0.43998 | 0.063355 | -2.28936 | 0.033147 | 0.077689 | -4.11929 |
| PNPLA3    | 0.490516 | -0.36714 | 2.265225 | 0.04006  | 0.089769 | -4.12055 |
| ZNF215    | -1.42133 | 1.199265 | -2.28864 | 0.033196 | 0.077785 | -4.12061 |
| ARID4B    | -0.80848 | 0.123861 | -2.28856 | 0.033201 | 0.077788 | -4.12075 |
| PRICKLE3  | -0.4801  | 0.658834 | -2.28844 | 0.03321  | 0.077795 | -4.12099 |
| CTH       | 0.501565 | -0.3935  | 2.287891 | 0.033867 | 0.078887 | -4.12109 |
| LAMB1     | 1.170292 | -0.61959 | 2.213666 | 0.040928 | 0.091254 | -4.1211  |
| LOC348840 | 1.477277 | -1.28866 | 2.196318 | 0.056118 | 0.115879 | -4.12117 |
| KRTAP9-3  | -0.72718 | 0.154218 | -2.28781 | 0.033253 | 0.077872 | -4.12214 |
| CALML3    | 0.369646 | -0.21936 | 2.287446 | 0.033278 | 0.077916 | -4.12282 |
| RPS20     | 1.006577 | -0.81762 | 2.287423 | 0.03328  | 0.077916 | -4.12286 |
| ACSL5     | -0.65019 | 0.448236 | -2.28729 | 0.033288 | 0.077928 | -4.1231  |
| DCAF16    | -0.46821 | 0.012005 | -2.26711 | 0.035333 | 0.081564 | -4.12327 |
| ASXL2     | -0.66686 | 0.506656 | -2.28699 | 0.033309 | 0.077951 | -4.12366 |
| HOXA4     | 0.453126 | -0.04035 | 2.286976 | 0.03331  | 0.077951 | -4.12369 |
| GCG       | -0.53766 | 0.041789 | -2.28545 | 0.03473  | 0.080467 | -4.12392 |
| ZDHHC7    | -0.59169 | 0.376674 | -2.28649 | 0.033344 | 0.07801  | -4.12458 |
| C4orf46   | 0.546951 | -0.6762  | 2.283607 | 0.035641 | 0.082081 | -4.12462 |
| CHRNA10   | -0.46234 | 0.635013 | -2.28594 | 0.033382 | 0.078081 | -4.12561 |

|           |          |          |          |          |          |          |
|-----------|----------|----------|----------|----------|----------|----------|
| EFCAB4A   | -0.67262 | 0.723134 | -2.28585 | 0.033388 | 0.078086 | -4.12577 |
| RAB32     | -1.14643 | 0.821407 | -2.28532 | 0.033424 | 0.078152 | -4.12674 |
| ZDHHHC21  | -0.71241 | 0.431071 | -2.28512 | 0.033439 | 0.078176 | -4.12713 |
| FMO9P     | 0.582519 | -0.2823  | 2.264545 | 0.037912 | 0.085974 | -4.12721 |
| ASB2      | 0.861778 | -0.41212 | 2.284672 | 0.033469 | 0.078238 | -4.12795 |
| UBR1      | -0.52091 | 0.565985 | -2.28452 | 0.033479 | 0.078253 | -4.12822 |
| ZNF614    | -0.63104 | 0.363633 | -2.28426 | 0.033498 | 0.078287 | -4.12872 |
| FNIP2     | 0.420302 | -0.45754 | 2.283947 | 0.033519 | 0.078325 | -4.12929 |
| MRGPRE    | 0.530358 | -0.35276 | 2.2837   | 0.033536 | 0.078349 | -4.12974 |
| C15orf37  | 0.344599 | -0.38563 | 2.283036 | 0.034205 | 0.079455 | -4.12998 |
| ZNF623    | -0.75245 | 0.191401 | -2.26308 | 0.03633  | 0.083374 | -4.13091 |
| GNRHR     | -0.74665 | 0.154823 | -2.28303 | 0.033583 | 0.078438 | -4.13098 |
| BTG1      | 0.701349 | -0.4763  | 2.282701 | 0.033606 | 0.078478 | -4.13159 |
| CRIP3     | -0.45339 | 0.335625 | -2.28267 | 0.033608 | 0.078478 | -4.13164 |
| SERPINB4  | -0.72573 | 0.214015 | -2.28255 | 0.033616 | 0.078488 | -4.13186 |
| LOC731789 | 1.464464 | -0.49572 | 2.168325 | 0.045691 | 0.099176 | -4.13198 |
| GCHFR     | 0.517346 | -0.4149  | 2.282288 | 0.033634 | 0.078521 | -4.13235 |
| THRAP3    | 0.470551 | -0.21889 | 2.282139 | 0.033645 | 0.078536 | -4.13263 |
| MRFAP1L1  | -0.62759 | 0.310724 | -2.2818  | 0.033668 | 0.078573 | -4.13325 |
| SLC24A4   | -0.82384 | 0.710983 | -2.28168 | 0.033677 | 0.078573 | -4.13348 |
| GDF1      | 0.402295 | 0.053346 | 2.281658 | 0.033678 | 0.078573 | -4.13351 |
| SIGLEC12  | -1.43602 | 0.23103  | -2.28158 | 0.033684 | 0.078573 | -4.13366 |
| SETD6     | 0.549    | -0.39448 | 2.28157  | 0.033684 | 0.078573 | -4.13368 |
| UROS      | -0.57124 | 0.185295 | -2.28138 | 0.033697 | 0.078593 | -4.13402 |
| MC5R      | -0.34824 | 0.1845   | -2.28129 | 0.033703 | 0.078593 | -4.13419 |
| IRF1      | -0.59781 | 0.469631 | -2.28127 | 0.033705 | 0.078593 | -4.13423 |
| THAP2     | -1.05082 | 0.405461 | -2.27798 | 0.036042 | 0.082848 | -4.1347  |
| KIAA1328  | 0.93044  | -0.23593 | 2.280405 | 0.034389 | 0.07977  | -4.13479 |
| SMC3      | -0.40865 | 0.08148  | -2.28087 | 0.033733 | 0.078643 | -4.13497 |
| PDYN      | -0.56393 | 0.159018 | -2.27968 | 0.03444  | 0.079869 | -4.13613 |
| TAF1L     | 0.316625 | -0.24249 | 2.280184 | 0.033781 | 0.078732 | -4.13624 |
| SH2D4B    | -0.42686 | 0.213664 | -2.27974 | 0.033811 | 0.078788 | -4.13705 |
| USP40     | -1.11192 | 0.697948 | -2.27972 | 0.033813 | 0.078788 | -4.1371  |
| LINC00308 | 0.866747 | -0.61393 | 2.182937 | 0.054336 | 0.113068 | -4.13715 |
| LOC93622  | 0.753129 | -0.52006 | 2.279527 | 0.033826 | 0.07881  | -4.13745 |
| EMX1      | 0.401916 | -0.35987 | 2.27903  | 0.033861 | 0.078882 | -4.13837 |
| RMI2      | -0.65841 | 0.242139 | -2.27869 | 0.033885 | 0.078918 | -4.13899 |
| USP46     | 0.323723 | -0.52123 | 2.278265 | 0.033915 | 0.078969 | -4.13978 |
| ANKMY1    | -0.35872 | 0.259867 | -2.27807 | 0.033928 | 0.078987 | -4.14014 |
| LOC142937 | -0.97756 | 0.68706  | -2.27804 | 0.03393  | 0.078987 | -4.1402  |
| IFNA2     | 0.497231 | -0.53006 | 2.276289 | 0.035377 | 0.081628 | -4.1405  |
| LOC100129 | -0.53151 | -0.0871  | -2.25736 | 0.036749 | 0.084041 | -4.14117 |
| OR7E24    | 0.520956 | -0.38584 | 2.277315 | 0.033981 | 0.079077 | -4.14153 |
| MFSD6L    | 0.860878 | -0.56534 | 2.27731  | 0.033981 | 0.079077 | -4.14154 |
| CHAD      | 0.410355 | -0.11069 | 2.27677  | 0.034019 | 0.079147 | -4.14253 |
| C12orf56  | 0.418479 | -0.38682 | 2.275993 | 0.034699 | 0.080424 | -4.14286 |
| NSDHL     | -0.53051 | 0.100192 | -2.27574 | 0.034718 | 0.080455 | -4.14333 |



|              |          |          |          |          |          |          |
|--------------|----------|----------|----------|----------|----------|----------|
| A1CF         | -0.47103 | 0.02835  | -2.27471 | 0.03549  | 0.08183  | -4.14336 |
| C15orf26     | 0.748451 | -0.2899  | 2.276317 | 0.034051 | 0.079202 | -4.14337 |
| DKFZp547c142 | 0.398633 | -0.16805 | 2.27605  | 0.03407  | 0.079236 | -4.14386 |
| LOC100501    | 0.703296 | -0.30109 | 2.275777 | 0.034089 | 0.079271 | -4.14437 |
| EP300        | -1.02667 | 1.203651 | -2.27542 | 0.034114 | 0.07932  | -4.14502 |
| KCNK9        | 0.307967 | -0.18927 | 2.274999 | 0.034144 | 0.07937  | -4.1458  |
| C13orf33     | -0.52928 | -0.09959 | -2.27489 | 0.034152 | 0.079379 | -4.14601 |
| SLC1A5       | 0.762523 | -0.19623 | 2.274709 | 0.034164 | 0.079399 | -4.14633 |
| KDM6A        | -0.57246 | 0.323856 | -2.2746  | 0.034172 | 0.079407 | -4.14653 |
| LOC100501    | 0.636523 | 0.089123 | 2.254213 | 0.036272 | 0.08328  | -4.14668 |
| FLJ30403     | -0.2958  | 0.124287 | -2.27428 | 0.034195 | 0.079441 | -4.14713 |
| SMARCA4      | -0.52821 | 0.495063 | -2.27381 | 0.034227 | 0.079498 | -4.14799 |
| CYB5R4       | -0.84744 | -0.04861 | -2.27366 | 0.034238 | 0.079514 | -4.14827 |
| TMEM208      | -0.50904 | 0.163735 | -2.27356 | 0.034245 | 0.079522 | -4.14846 |
| SLC37A1      | -0.70467 | 0.87487  | -2.27342 | 0.034255 | 0.079535 | -4.14871 |
| WDR24        | 0.377713 | -0.03605 | 2.272586 | 0.034314 | 0.079662 | -4.15025 |
| FAM27A       | -0.69726 | 0.367001 | -2.27245 | 0.034324 | 0.07967  | -4.1505  |
| OR10J5       | 0.58347  | -0.41793 | 2.272419 | 0.034326 | 0.07967  | -4.15055 |
| FUT5         | 0.421898 | -0.2052  | 2.272196 | 0.034341 | 0.079698 | -4.15096 |
| SLC40A1      | -1.01066 | 0.098801 | -2.27205 | 0.034352 | 0.079712 | -4.15123 |
| LOC100501    | 0.657006 | -0.42239 | 2.271747 | 0.034373 | 0.079752 | -4.15179 |
| ANXA7        | -0.54482 | 0.256827 | -2.27165 | 0.03438  | 0.079759 | -4.15197 |
| NCF2         | -0.71126 | 0.456465 | -2.27127 | 0.034407 | 0.079803 | -4.15268 |
| DHRS11       | 0.327348 | -0.28518 | 2.270497 | 0.034462 | 0.079911 | -4.15409 |
| ZC3HC1       | -0.40479 | 0.184474 | -2.26762 | 0.034667 | 0.080376 | -4.15939 |
| TIMD4        | -0.85611 | 0.427384 | -2.24679 | 0.037537 | 0.085414 | -4.16014 |
| EREG         | 1.016299 | -0.08629 | 2.267203 | 0.034696 | 0.080424 | -4.16015 |
| POLR2I       | 0.552119 | -0.37297 | 2.267185 | 0.034698 | 0.080424 | -4.16019 |
| NTNG2        | -0.77167 | 0.642523 | -2.26685 | 0.034721 | 0.080455 | -4.1608  |
| CNNM2        | -0.80562 | 0.760052 | -2.26647 | 0.034749 | 0.0805   | -4.16151 |
| MIR600HG     | -0.99812 | 0.310742 | -2.26588 | 0.034791 | 0.080588 | -4.16259 |
| GPR62        | 0.482519 | -0.33334 | 2.265625 | 0.034809 | 0.080621 | -4.16306 |
| SCN4B        | -0.66504 | 0.134147 | -2.26482 | 0.035498 | 0.081839 | -4.16324 |
| CYB5D1       | 0.43079  | -0.07721 | 2.263612 | 0.036291 | 0.083314 | -4.16339 |
| ZNF211       | -0.6387  | 0.351064 | -2.26539 | 0.034826 | 0.08065  | -4.16349 |
| TBC1D10B     | -0.37131 | 0.370898 | -2.2651  | 0.034847 | 0.080689 | -4.16402 |
| RBM41        | -0.64534 | 0.103791 | -2.26494 | 0.034858 | 0.080704 | -4.16431 |
| RNASEH2C     | 0.543609 | -0.26875 | 2.264835 | 0.034866 | 0.080704 | -4.16451 |
| C12orf40     | 0.36203  | -0.03648 | 2.262975 | 0.036337 | 0.083374 | -4.16454 |
| ZNF441       | -0.69285 | 0.200199 | -2.26242 | 0.036378 | 0.083396 | -4.16554 |
| SRSF10       | -0.59164 | 0.07648  | -2.26415 | 0.034915 | 0.080801 | -4.16577 |
| CRYAA        | -0.49435 | -0.00615 | -2.26414 | 0.034916 | 0.080801 | -4.16579 |
| C8orf45      | 1.348176 | -0.42919 | 2.114994 | 0.060902 | 0.123571 | -4.16605 |
| TTY11        | 0.830262 | -0.19208 | 2.263937 | 0.03493  | 0.080825 | -4.16616 |
| PRR18        | 0.838135 | -0.4808  | 2.21969  | 0.041371 | 0.091937 | -4.16649 |
| SLC45A3      | 0.750862 | -0.16564 | 2.242597 | 0.037137 | 0.08472  | -4.1677  |
| MOSPD2       | -0.79286 | 0.207327 | -2.26275 | 0.035016 | 0.081014 | -4.16835 |

|           |          |          |          |          |          |          |
|-----------|----------|----------|----------|----------|----------|----------|
| KRTAP9-4  | -0.44124 | -0.09598 | -2.2616  | 0.035732 | 0.082242 | -4.16911 |
| E2F1      | -0.62712 | 0.697526 | -2.26232 | 0.035047 | 0.081075 | -4.16913 |
| PIF1      | -0.70871 | 0.831345 | -2.26186 | 0.03508  | 0.081143 | -4.16998 |
| TSPAN7    | 0.962949 | -0.40078 | 2.188431 | 0.045029 | 0.098102 | -4.17008 |
| PAQR9     | 0.908032 | -0.50625 | 2.216311 | 0.039896 | 0.089461 | -4.17023 |
| XCL2      | 0.997503 | -0.35508 | 2.261538 | 0.035103 | 0.081186 | -4.17057 |
| PTPRE     | -0.65602 | 0.367751 | -2.26127 | 0.035123 | 0.081222 | -4.17107 |
| FRMPD2    | -0.43369 | -0.14087 | -2.25935 | 0.036603 | 0.083815 | -4.17108 |
| NCF1      | -0.45533 | 0.602077 | -2.26114 | 0.035132 | 0.081233 | -4.17129 |
| KRT37     | 0.748463 | -0.38153 | 2.216242 | 0.040721 | 0.090907 | -4.17157 |
| EDDM3B    | -0.45779 | 0.091557 | -2.26093 | 0.035147 | 0.081253 | -4.17169 |
| APC       | -0.55136 | 0.234935 | -2.26091 | 0.035149 | 0.081253 | -4.17173 |
| BRI3BP    | -0.43349 | 0.467239 | -2.26083 | 0.035154 | 0.081256 | -4.17186 |
| TMEM168   | -1.01404 | 0.351567 | -2.25873 | 0.036649 | 0.0839   | -4.1722  |
| SCUBE3    | -0.48197 | 0.002359 | -2.26047 | 0.035181 | 0.081308 | -4.17254 |
| PTGFR     | -0.5157  | 0.141431 | -2.26013 | 0.035205 | 0.081355 | -4.17315 |
| ZNF337    | -0.56192 | 0.6299   | -2.26006 | 0.03521  | 0.081357 | -4.17329 |
| SMG9      | -0.52522 | 0.649479 | -2.25993 | 0.035219 | 0.081368 | -4.17351 |
| FOXP4     | -0.45907 | 0.558005 | -2.25982 | 0.035228 | 0.081378 | -4.17373 |
| DCP2      | -0.8284  | 0.016266 | -2.25959 | 0.035244 | 0.081406 | -4.17414 |
| GALNT10   | -0.64612 | 0.715433 | -2.25943 | 0.035256 | 0.081424 | -4.17444 |
| FAM176B   | 0.641066 | -0.02121 | 2.259264 | 0.035268 | 0.081442 | -4.17474 |
| GSTT2     | -0.51366 | 0.338399 | -2.25909 | 0.03528  | 0.081462 | -4.17507 |
| BCL7B     | 0.334198 | -0.04277 | 2.258428 | 0.035328 | 0.081563 | -4.17628 |
| RCE1      | -0.33846 | 0.54148  | -2.25814 | 0.03535  | 0.081588 | -4.17681 |
| POMZP3    | 0.678767 | 0.027795 | 2.258103 | 0.035352 | 0.081588 | -4.17687 |
| PSKH1     | -0.522   | 0.286027 | -2.25768 | 0.035382 | 0.08163  | -4.17764 |
| CACNG3    | -0.42139 | 0.061495 | -2.25743 | 0.035401 | 0.081663 | -4.17811 |
| PCDHB16   | 0.681404 | -0.45233 | 2.255328 | 0.0369   | 0.084306 | -4.17831 |
| SNX4      | -1.0547  | -0.25544 | -2.257   | 0.035432 | 0.081725 | -4.1789  |
| C16orf46  | 1.224213 | -0.80064 | 2.05491  | 0.079746 | 0.152344 | -4.17916 |
| RBM45     | -0.47034 | 0.057551 | -2.25665 | 0.035458 | 0.081775 | -4.17955 |
| ADRA2A    | 1.095107 | -0.19455 | 2.182752 | 0.045517 | 0.098887 | -4.17967 |
| TIMM23    | -0.30472 | 0.235761 | -2.25635 | 0.035479 | 0.081815 | -4.18008 |
| ABI3BP    | 1.161069 | -0.37892 | 2.182449 | 0.045543 | 0.098922 | -4.18018 |
| LOC100130 | -0.81209 | 0.18466  | -2.25533 | 0.03619  | 0.083131 | -4.18051 |
| KLRAP1    | -0.50801 | 0.006372 | -2.25367 | 0.037023 | 0.084502 | -4.1813  |
| SEPN1     | 0.482792 | -0.12632 | 2.255519 | 0.03554  | 0.081918 | -4.18161 |
| PSMD9     | -0.36595 | 0.263504 | -2.25551 | 0.035541 | 0.081918 | -4.18163 |
| SLC35G1   | 0.455906 | -0.27685 | 2.255446 | 0.035546 | 0.081919 | -4.18175 |
| LCA5      | -0.65958 | -0.05878 | -2.23478 | 0.03773  | 0.085674 | -4.18182 |
| YPEL2     | -0.4571  | 0.684234 | -2.25527 | 0.035559 | 0.08194  | -4.18208 |
| SMARCA1   | -0.39572 | -0.00913 | -2.25516 | 0.035566 | 0.081948 | -4.18227 |
| ZNF781    | -0.81484 | 0.198817 | -2.23432 | 0.038486 | 0.087027 | -4.18243 |
| ZSWIM1    | -0.39997 | 0.41555  | -2.255   | 0.035578 | 0.081965 | -4.18257 |
| DDX51     | 0.580601 | -0.1088  | 2.254932 | 0.035583 | 0.081967 | -4.18269 |
| CPNE6     | 0.384648 | -0.319   | 2.254773 | 0.035595 | 0.081985 | -4.18298 |

|          |          |          |          |          |          |          |
|----------|----------|----------|----------|----------|----------|----------|
| GAR1     | 0.469039 | -0.30734 | 2.253518 | 0.035687 | 0.082167 | -4.18528 |
| RRP15    | -0.4648  | 0.124864 | -2.25305 | 0.035721 | 0.082231 | -4.18614 |
| KRT6B    | -0.49493 | 0.126409 | -2.25303 | 0.035723 | 0.082231 | -4.18618 |
| MGMT     | 0.509458 | -0.30203 | 2.252399 | 0.035769 | 0.082318 | -4.18734 |
| ANAPC1   | 0.368318 | -0.0705  | 2.251519 | 0.035833 | 0.082457 | -4.18895 |
| GAGE7    | -1.00036 | 0.099982 | -2.25115 | 0.035861 | 0.08251  | -4.18963 |
| G3BP2    | -0.90641 | 0.683531 | -2.25077 | 0.035888 | 0.082562 | -4.19031 |
| ARFGAP1  | -0.70209 | 0.70454  | -2.25073 | 0.035892 | 0.082562 | -4.1904  |
| ZNF484   | -0.54819 | 0.109639 | -2.25057 | 0.035903 | 0.082579 | -4.19069 |
| ARFGAP3  | -0.42223 | 0.173028 | -2.25005 | 0.035942 | 0.082658 | -4.19164 |
| KIAA1614 | -0.62024 | 0.235874 | -2.24943 | 0.035988 | 0.082753 | -4.19278 |
| TUBB4A   | -0.94276 | 0.930167 | -2.24923 | 0.036002 | 0.082777 | -4.19314 |
| SREK1    | -0.8148  | 0.203339 | -2.24915 | 0.036008 | 0.082781 | -4.19329 |
| MIR31HG  | 0.709894 | -0.67118 | 2.202913 | 0.045031 | 0.098102 | -4.19488 |
| ACTRT2   | 0.325307 | -0.24739 | 2.248016 | 0.036092 | 0.082954 | -4.19536 |
| SH3D19   | -1.08841 | 0.425541 | -2.24786 | 0.036103 | 0.082971 | -4.19565 |
| BTAF1    | -0.82835 | 0.279952 | -2.20189 | 0.041058 | 0.091451 | -4.19573 |
| MTERFD3  | -0.58432 | 0.24131  | -2.24749 | 0.036131 | 0.083024 | -4.19633 |
| C10orf76 | -0.45559 | 0.250861 | -2.24724 | 0.036149 | 0.083057 | -4.19678 |
| HTN3     | -0.69404 | 0.113609 | -2.24702 | 0.036166 | 0.083085 | -4.19719 |
| PSCA     | 0.504971 | -0.20429 | 2.246507 | 0.036204 | 0.083153 | -4.19812 |
| RASIP1   | 0.831318 | -0.1598  | 2.245193 | 0.036942 | 0.084364 | -4.1989  |
| PIGO     | -0.32949 | 0.133983 | -2.24581 | 0.036256 | 0.08326  | -4.19941 |
| FAM81A   | 0.506753 | -0.27194 | 2.245206 | 0.036301 | 0.083326 | -4.2005  |
| NISCH    | -0.37906 | 0.388586 | -2.24507 | 0.036311 | 0.08334  | -4.20076 |
| PGAM2    | 0.41501  | 0.018797 | 2.244664 | 0.036341 | 0.083374 | -4.2015  |
| MLC1     | 0.808062 | 0.10448  | 2.24464  | 0.036343 | 0.083374 | -4.20154 |
| RABGGTB  | -0.39859 | 0.04748  | -2.24452 | 0.036352 | 0.083377 | -4.20176 |
| ITGAD    | 0.741108 | -0.06541 | 2.244444 | 0.036357 | 0.083377 | -4.2019  |
| ZBED3    | 0.650125 | -0.37197 | 2.244411 | 0.03636  | 0.083377 | -4.20196 |
| SPTB     | 0.437911 | -0.0905  | 2.24436  | 0.036364 | 0.083377 | -4.20205 |
| ADCY10   | 0.41739  | -0.35904 | 2.199108 | 0.043054 | 0.094755 | -4.20209 |
| LY96     | -1.36659 | -0.23038 | -2.24434 | 0.036365 | 0.083377 | -4.20209 |
| WDR87    | 0.401789 | -0.13214 | 2.244073 | 0.036385 | 0.083403 | -4.20258 |
| RAD51    | -0.776   | 0.754314 | -2.24382 | 0.036404 | 0.083437 | -4.20305 |
| RPS19    | 0.806861 | -0.60138 | 2.243698 | 0.036413 | 0.083447 | -4.20326 |
| ARHGAP9  | -0.434   | 0.405483 | -2.2435  | 0.036428 | 0.083472 | -4.20363 |
| GPR22    | 0.576367 | -0.12866 | 2.242258 | 0.037163 | 0.084769 | -4.20422 |
| KCNK4    | 0.331809 | -0.39503 | 2.24256  | 0.036498 | 0.083623 | -4.20534 |
| CIAO1    | -0.24521 | 0.113594 | -2.24242 | 0.036509 | 0.083637 | -4.2056  |
| PRO1768  | 0.657861 | -0.10595 | 2.221389 | 0.038766 | 0.087458 | -4.20592 |
| TMEM150  | -0.39362 | 0.367369 | -2.24217 | 0.036527 | 0.083669 | -4.20605 |
| COMT     | 0.421375 | -0.14096 | 2.242085 | 0.036534 | 0.083675 | -4.20621 |
| ADAMTSL4 | -1.11889 | 1.097398 | -2.24184 | 0.036552 | 0.083707 | -4.20666 |
| PDCD1    | 0.547254 | -0.20009 | 2.240933 | 0.03662  | 0.083843 | -4.20832 |
| KCTD19   | 0.409107 | -0.15533 | 2.239905 | 0.03734  | 0.085085 | -4.20848 |
| TRIP12   | -0.7478  | 0.46023  | -2.24042 | 0.036658 | 0.083912 | -4.20925 |

|           |          |          |          |          |          |          |
|-----------|----------|----------|----------|----------|----------|----------|
| NEDD9     | 0.599525 | -0.14931 | 2.240238 | 0.036672 | 0.083933 | -4.20958 |
| ALDOAP2   | -0.4722  | 0.312812 | -2.24012 | 0.036681 | 0.083945 | -4.20981 |
| FABP12    | 0.54539  | -0.40654 | 2.238774 | 0.037426 | 0.085246 | -4.21053 |
| ZNF498    | -0.52169 | 0.416529 | -2.23967 | 0.036715 | 0.084011 | -4.21062 |
| LOC392288 | -0.48917 | 0.323293 | -2.23961 | 0.036719 | 0.084012 | -4.21073 |
| EPPK1     | -0.81691 | 0.01074  | -2.23952 | 0.036726 | 0.084014 | -4.2109  |
| UBA6      | -0.85614 | 0.419072 | -2.23948 | 0.036729 | 0.084014 | -4.21096 |
| LIMS1     | -0.8358  | 0.682739 | -2.23929 | 0.036744 | 0.084038 | -4.21132 |
| DUOXA1    | -0.54599 | 0.070897 | -2.23889 | 0.036773 | 0.084087 | -4.21204 |
| ACAD10    | -0.67294 | 0.731691 | -2.23861 | 0.036795 | 0.084126 | -4.21256 |
| C4B       | 1.231455 | -0.32939 | 2.238208 | 0.036825 | 0.084185 | -4.21329 |
| ACOX1     | -0.89641 | 0.689813 | -2.23814 | 0.03683  | 0.084187 | -4.21342 |
| IL1RAPL2  | -0.39226 | 0.151322 | -2.23753 | 0.036876 | 0.084282 | -4.21453 |
| LOC221814 | -0.502   | 0.025315 | -2.23643 | 0.037604 | 0.085497 | -4.21477 |
| C11orf83  | 0.4207   | -0.21646 | 2.23723  | 0.036899 | 0.084306 | -4.21508 |
| HLA-DPB2  | 0.658043 | -0.16478 | 2.237019 | 0.036915 | 0.084331 | -4.21546 |
| C14orf55  | -0.65092 | 0.168706 | -2.21605 | 0.039186 | 0.088199 | -4.21552 |
| MAN1B1    | -0.25796 | 0.165713 | -2.23696 | 0.036919 | 0.084331 | -4.21557 |
| AVP       | 0.738104 | -0.19253 | 2.23673  | 0.036937 | 0.084361 | -4.21599 |
| PDGFRB    | 0.992109 | -0.12928 | 2.236279 | 0.036971 | 0.08442  | -4.21681 |
| LOC100506 | -0.44716 | 0.044461 | -2.23523 | 0.037696 | 0.085636 | -4.21695 |
| DHRS1     | -0.44571 | 0.178838 | -2.23603 | 0.03699  | 0.084453 | -4.21727 |
| CEND1     | 0.334263 | -0.41809 | 2.235674 | 0.037017 | 0.084502 | -4.21792 |
| ARHGEF11  | -0.89974 | 0.955316 | -2.23558 | 0.037024 | 0.084502 | -4.2181  |
| PDC       | 0.570568 | -0.20719 | 2.234118 | 0.037781 | 0.085759 | -4.21895 |
| TNIK      | 0.585748 | -0.21963 | 2.234555 | 0.037102 | 0.084659 | -4.21996 |
| DIXDC1    | -0.61848 | 0.240458 | -2.23455 | 0.037102 | 0.084659 | -4.21996 |
| NPDC1     | 0.533401 | -0.16852 | 2.23438  | 0.037115 | 0.084679 | -4.22028 |
| LOC100133 | -0.68497 | 0.201282 | -2.2335  | 0.037182 | 0.084794 | -4.22189 |
| LOC100136 | 0.733935 | -0.02841 | 2.233492 | 0.037182 | 0.084794 | -4.2219  |
| KCNK17    | 0.654766 | -0.4158  | 2.233264 | 0.0372   | 0.084824 | -4.22231 |
| TRIM15    | 0.974761 | -0.27159 | 2.211828 | 0.039521 | 0.088815 | -4.22309 |
| FLJ31485  | 0.343502 | -0.15618 | 2.232677 | 0.037244 | 0.084916 | -4.22338 |
| COG3      | -0.47297 | -0.07828 | -2.23225 | 0.037277 | 0.08498  | -4.22416 |
| FAM46D    | -0.50779 | -0.0994  | -2.23174 | 0.037316 | 0.085059 | -4.22509 |
| ARRDC3    | 0.731525 | -0.11076 | 2.231538 | 0.037331 | 0.085083 | -4.22546 |
| LANCL1    | -0.59395 | 0.388602 | -2.23149 | 0.037335 | 0.085083 | -4.22555 |
| SRSF6     | -0.54942 | 0.273015 | -2.23092 | 0.037379 | 0.085159 | -4.22659 |
| TNFRSF1A  | -0.63945 | 0.564919 | -2.23088 | 0.037381 | 0.085159 | -4.22665 |
| LOC100133 | -0.84829 | 0.252083 | -2.22941 | 0.038142 | 0.086389 | -4.22745 |
| PRR12     | 0.366529 | -0.07009 | 2.230269 | 0.037428 | 0.085246 | -4.22777 |
| MLH1      | -0.37354 | 0.114629 | -2.23009 | 0.037442 | 0.085267 | -4.2281  |
| FAHD2A    | 0.444247 | -0.19345 | 2.229979 | 0.037451 | 0.085277 | -4.2283  |
| DOK6      | -0.89502 | 0.542136 | -2.2299  | 0.037457 | 0.085277 | -4.22845 |
| AGAP3     | 0.774691 | 0.070524 | 2.229839 | 0.037461 | 0.085277 | -4.22856 |
| PLIN4     | -1.20145 | 0.962698 | -2.22981 | 0.037464 | 0.085277 | -4.22862 |
| LOC100653 | 0.537419 | -0.12388 | 2.228492 | 0.038213 | 0.08652  | -4.22911 |

|          |          |          |          |          |          |          |
|----------|----------|----------|----------|----------|----------|----------|
| PTPRG    | 0.549356 | -0.45079 | 2.207818 | 0.040577 | 0.090706 | -4.2296  |
| RDH10    | -0.41816 | 0.419196 | -2.22901 | 0.037525 | 0.085406 | -4.23007 |
| SLAMF7   | -0.49687 | 0.114272 | -2.22895 | 0.037529 | 0.085406 | -4.23017 |
| CD180    | -0.82751 | 1.044599 | -2.22869 | 0.03755  | 0.085433 | -4.23065 |
| HELB     | -1.01982 | 0.707242 | -2.22863 | 0.037554 | 0.085433 | -4.23076 |
| CYP27A1  | 1.01398  | 0.186559 | 2.228434 | 0.037569 | 0.085457 | -4.23112 |
| HIF1AN   | -0.42795 | 0.327588 | -2.2283  | 0.037579 | 0.08547  | -4.23135 |
| SLC25A41 | 0.533922 | -0.50698 | 2.228229 | 0.037585 | 0.085472 | -4.23149 |
| BEGAIN   | -1.14316 | 0.067959 | -2.22818 | 0.037589 | 0.085472 | -4.23158 |
| C2orf74  | -0.63794 | 0.592173 | -2.22785 | 0.037614 | 0.0855   | -4.23218 |
| CCDC102B | 0.402638 | -0.1224  | 2.227348 | 0.037653 | 0.085561 | -4.23309 |
| PSMC3    | -0.36082 | 0.35541  | -2.22735 | 0.037653 | 0.085561 | -4.23309 |
| PCDHB10  | -0.73464 | 0.177871 | -2.22733 | 0.037654 | 0.085561 | -4.23313 |
| FSHB     | 0.562145 | -0.23236 | 2.224601 | 0.039241 | 0.088286 | -4.23339 |
| STAC     | -1.58435 | 0.986757 | -2.22695 | 0.037683 | 0.085617 | -4.23381 |
| ACRV1    | -0.42178 | -0.27895 | -2.20452 | 0.041671 | 0.092437 | -4.23413 |
| FAM160A2 | -0.44888 | 0.03745  | -2.22668 | 0.037704 | 0.085644 | -4.2343  |
| SLC20A1  | -0.66256 | 0.356972 | -2.22644 | 0.037722 | 0.085674 | -4.23474 |
| CXCL9    | -1.0144  | 0.214693 | -2.22636 | 0.037729 | 0.085674 | -4.2349  |
| CCDC30   | -1.31156 | 0.916612 | -2.22582 | 0.03777  | 0.085745 | -4.23587 |
| MPST     | 0.510224 | -0.19453 | 2.225039 | 0.037831 | 0.085863 | -4.23729 |
| GALNT6   | 0.593597 | 0.201999 | 2.224843 | 0.037846 | 0.085888 | -4.23765 |
| SLC1A2   | -0.42275 | 0.030128 | -2.22477 | 0.037851 | 0.08589  | -4.23778 |
| PLD2     | 0.399637 | -0.14202 | 2.224705 | 0.037857 | 0.085892 | -4.2379  |
| UTY      | -0.9991  | 0.301831 | -2.22452 | 0.037871 | 0.085905 | -4.23824 |
| TYMP     | -0.91263 | 0.76539  | -2.22451 | 0.037871 | 0.085905 | -4.23825 |
| BAMBI    | -0.96168 | 1.209677 | -2.22424 | 0.037893 | 0.085944 | -4.23875 |
| CCBE1    | -0.74863 | 0.258703 | -2.22395 | 0.037915 | 0.085974 | -4.23927 |
| C1orf55  | -1.08334 | 1.083967 | -2.22354 | 0.037947 | 0.086028 | -4.24003 |
| NUDT11   | -0.55583 | -0.09346 | -2.22353 | 0.037947 | 0.086028 | -4.24003 |
| PSMD8    | -0.32905 | 0.288193 | -2.22341 | 0.037957 | 0.086039 | -4.24025 |
| GBF1     | 0.436053 | -0.2375  | 2.223251 | 0.037969 | 0.086058 | -4.24055 |
| WIPF1    | -0.61104 | 0.804268 | -2.22293 | 0.037994 | 0.086105 | -4.24114 |
| NUP205   | 0.540202 | -0.41465 | 2.222479 | 0.038029 | 0.086174 | -4.24195 |
| DOCK2    | -0.56713 | 0.431545 | -2.22228 | 0.038045 | 0.086189 | -4.24232 |
| PCDH18   | 1.671364 | -1.17493 | 2.024027 | 0.100433 | 0.181925 | -4.24284 |
| HDAC3    | -0.28971 | 0.09897  | -2.2215  | 0.038105 | 0.086316 | -4.24373 |
| FST      | -0.4969  | 0.089487 | -2.2202  | 0.038859 | 0.087598 | -4.24407 |
| ANKRD58  | 0.317068 | 0.076812 | 2.220933 | 0.038149 | 0.086396 | -4.24476 |
| FAM125B  | -0.66554 | 0.5171   | -2.22067 | 0.03817  | 0.086432 | -4.24523 |
| FOXC1    | -0.72421 | 0.226032 | -2.22001 | 0.038221 | 0.086528 | -4.24643 |
| OSBPL3   | 0.531853 | -0.12033 | 2.21977  | 0.03824  | 0.086562 | -4.24687 |
| APLN     | 0.318884 | -0.23745 | 2.219643 | 0.03825  | 0.086574 | -4.24711 |
| H19      | 0.48426  | -0.08979 | 2.219502 | 0.038261 | 0.086589 | -4.24736 |
| THOC3    | 0.44446  | -0.20928 | 2.21841  | 0.038346 | 0.086772 | -4.24935 |
| PCNA     | -0.59368 | 0.26877  | -2.21828 | 0.038356 | 0.086785 | -4.24957 |
| SNAPC5   | -0.82849 | 0.683511 | -2.2178  | 0.038394 | 0.086859 | -4.25044 |

|           |          |          |          |          |          |          |
|-----------|----------|----------|----------|----------|----------|----------|
| TRIM49    | -0.36719 | -0.11957 | -2.21649 | 0.039151 | 0.088166 | -4.25074 |
| RPL31     | -0.46494 | 0.042053 | -2.21755 | 0.038414 | 0.086894 | -4.2509  |
| MRPL22    | -0.8614  | -0.0702  | -2.2172  | 0.038441 | 0.086946 | -4.25154 |
| RNASET2   | -0.58447 | 0.492985 | -2.21678 | 0.038474 | 0.087011 | -4.25231 |
| CRCP      | -0.64233 | 0.092804 | -2.21613 | 0.038525 | 0.087105 | -4.25349 |
| TXNRD1    | -0.70662 | 0.174795 | -2.21606 | 0.038531 | 0.087105 | -4.25361 |
| RWDD4     | -0.71833 | 0.173248 | -2.21602 | 0.038534 | 0.087105 | -4.25369 |
| ACP2      | -0.64331 | 0.563887 | -2.21593 | 0.038541 | 0.087105 | -4.25386 |
| MRPS7     | -0.50155 | 0.608447 | -2.21591 | 0.038543 | 0.087105 | -4.25388 |
| BRE       | -0.39222 | 0.302415 | -2.21579 | 0.038552 | 0.087117 | -4.25411 |
| C1orf54   | 0.462845 | -0.31999 | 2.215643 | 0.038564 | 0.087129 | -4.25437 |
| HEPACAM1  | 0.638225 | -0.19233 | 2.215608 | 0.038566 | 0.087129 | -4.25443 |
| ACAP2     | -0.66057 | 0.376769 | -2.21529 | 0.038592 | 0.087176 | -4.25502 |
| GP1BA     | 0.429144 | -0.21056 | 2.215046 | 0.038611 | 0.087206 | -4.25545 |
| C1QTNF9B  | 0.791627 | -0.09063 | 2.215008 | 0.038614 | 0.087206 | -4.25552 |
| KIAA1984  | 0.822736 | -0.06457 | 2.214926 | 0.03862  | 0.08721  | -4.25567 |
| GGA3      | -0.36991 | 0.802731 | -2.21451 | 0.038653 | 0.087274 | -4.25642 |
| KCNJ15    | -0.75328 | 0.799885 | -2.21439 | 0.038662 | 0.087285 | -4.25664 |
| LOC100501 | -1.3239  | -0.07961 | -2.21131 | 0.040296 | 0.090234 | -4.25709 |
| CCM2      | -0.30547 | 0.348824 | -2.21379 | 0.03871  | 0.087375 | -4.25773 |
| TNFSF18   | 0.849457 | 0.096727 | 2.213775 | 0.038711 | 0.087375 | -4.25776 |
| ZNF619    | -0.35155 | 0.061259 | -2.21365 | 0.038721 | 0.087381 | -4.25799 |
| GNAL      | -0.69432 | -0.02643 | -2.21358 | 0.038726 | 0.087381 | -4.2581  |
| ZNF761    | -0.59575 | 0.08582  | -2.21357 | 0.038727 | 0.087381 | -4.25813 |
| PCDHB5    | 0.289667 | -0.05793 | 2.212799 | 0.038788 | 0.087499 | -4.25953 |
| NR2C1     | -0.54842 | 0.353128 | -2.21271 | 0.038795 | 0.087502 | -4.25968 |
| TXNRD2    | 0.39126  | 0.130209 | 2.212647 | 0.0388   | 0.087502 | -4.25981 |
| TMEM47    | -0.26915 | 0.05383  | -2.21261 | 0.038803 | 0.087502 | -4.25987 |
| LGALS7B   | 0.341351 | -0.34788 | 2.212113 | 0.038842 | 0.087572 | -4.26077 |
| LOC158431 | -0.83307 | 0.279946 | -2.2121  | 0.038843 | 0.087572 | -4.26079 |
| BBIP1     | -0.66141 | 0.298342 | -2.21152 | 0.03889  | 0.087657 | -4.26185 |
| DLG4      | 0.696358 | -0.14759 | 2.211419 | 0.038897 | 0.087664 | -4.26203 |
| RANBP2    | -0.76011 | 0.878216 | -2.21119 | 0.038915 | 0.087695 | -4.26244 |
| MS4A12    | -0.72901 | 0.211593 | -2.2109  | 0.038938 | 0.087736 | -4.26297 |
| PGM2L1    | -0.43276 | -0.10302 | -2.21061 | 0.038962 | 0.08778  | -4.26351 |
| HAPLN4    | 0.414452 | -0.00878 | 2.210221 | 0.038992 | 0.087828 | -4.2642  |
| APOC1     | 0.639367 | -0.15506 | 2.20882  | 0.039762 | 0.089223 | -4.26453 |
| PAFAH1B1  | -0.5804  | 0.466441 | -2.20985 | 0.039022 | 0.087885 | -4.26488 |
| NCBP1     | -0.5072  | 0.245867 | -2.20812 | 0.03916  | 0.088174 | -4.268   |
| GSTM2     | -0.72788 | 0.694047 | -2.2078  | 0.039185 | 0.088199 | -4.26858 |
| SARDH     | 0.371901 | -0.11237 | 2.207767 | 0.039188 | 0.088199 | -4.26865 |
| INO80B    | -0.30728 | 0.330118 | -2.20776 | 0.039188 | 0.088199 | -4.26866 |
| SESTD1    | -1.08705 | 0.752891 | -2.20732 | 0.039223 | 0.088257 | -4.26945 |
| SENP8     | -0.55624 | 0.178745 | -2.20732 | 0.039224 | 0.088257 | -4.26945 |
| DACT1     | 0.421401 | -0.18316 | 2.206603 | 0.039281 | 0.088366 | -4.27076 |
| NPNT      | -0.41132 | -0.0244  | -2.20631 | 0.039304 | 0.088409 | -4.27128 |
| IMP4      | -0.75652 | 0.66763  | -2.20596 | 0.039333 | 0.088463 | -4.27193 |

|           |          |          |          |          |          |          |
|-----------|----------|----------|----------|----------|----------|----------|
| CEP164    | -0.44615 | 0.443956 | -2.20501 | 0.039409 | 0.088613 | -4.27364 |
| OCEL1     | 0.585215 | -0.1665  | 2.204722 | 0.039432 | 0.088655 | -4.27416 |
| PRO0471   | 0.68567  | -0.1055  | 2.203092 | 0.040223 | 0.090124 | -4.27481 |
| TEAD3     | 0.621789 | -0.37587 | 2.204257 | 0.039469 | 0.088729 | -4.275   |
| GUCY1A3   | 0.762411 | 0.078496 | 2.204073 | 0.039484 | 0.088752 | -4.27534 |
| CPSF3L    | -0.88455 | 0.958784 | -2.20376 | 0.039509 | 0.088799 | -4.27591 |
| ATP1A2    | 0.832918 | -0.38458 | 2.202202 | 0.040296 | 0.090234 | -4.27641 |
| HIPK1     | -0.74565 | 0.752339 | -2.20342 | 0.039536 | 0.088839 | -4.27651 |
| CCT4      | 0.611895 | -0.50453 | 2.203247 | 0.03955  | 0.08886  | -4.27683 |
| CLEC3B    | 0.637105 | -0.37171 | 2.203156 | 0.039558 | 0.088865 | -4.27699 |
| CETP      | -0.75443 | 1.026283 | -2.20311 | 0.039561 | 0.088865 | -4.27708 |
| HIST1H3E  | -0.42715 | 0.39935  | -2.20285 | 0.039583 | 0.088902 | -4.27756 |
| YIPF7     | -0.73312 | -0.07077 | -2.20148 | 0.040354 | 0.090334 | -4.2777  |
| WDR18     | 0.504733 | 0.021308 | 2.202629 | 0.0396   | 0.088928 | -4.27795 |
| RGS2      | 0.94743  | -0.24164 | 2.202592 | 0.039603 | 0.088928 | -4.27801 |
| GFOD1     | 0.50934  | -0.10124 | 2.202368 | 0.039621 | 0.088958 | -4.27842 |
| LRRIQ3    | -0.77629 | 0.023959 | -2.20221 | 0.039634 | 0.088977 | -4.27871 |
| LOC10029: | 0.207563 | -0.04613 | 2.198731 | 0.041317 | 0.091868 | -4.27944 |
| ACPL2     | -0.72087 | 0.125249 | -2.20132 | 0.039706 | 0.089128 | -4.28031 |
| HIST2H2AC | -0.52088 | 0.624531 | -2.20122 | 0.039714 | 0.089136 | -4.2805  |
| WNK1      | 0.598824 | -0.01356 | 2.201139 | 0.03972  | 0.08914  | -4.28064 |
| GJA3      | 0.521839 | -0.12207 | 2.200368 | 0.039783 | 0.08926  | -4.28204 |
| NUP54     | -0.54158 | -0.05924 | -2.20023 | 0.039794 | 0.089274 | -4.28228 |
| ARPC1A    | -0.3331  | 0.094882 | -2.19971 | 0.039836 | 0.089359 | -4.28322 |
| TSTD1     | -0.45059 | 0.270132 | -2.19943 | 0.039859 | 0.0894   | -4.28373 |
| RPS16     | 0.862645 | -0.59635 | 2.199276 | 0.039871 | 0.089417 | -4.28401 |
| SLC12A2   | -0.54364 | 0.201893 | -2.19877 | 0.039912 | 0.089489 | -4.28492 |
| INSIG1    | -0.41125 | 0.08543  | -2.19793 | 0.039981 | 0.089631 | -4.28644 |
| KRT15     | 0.417113 | -0.38687 | 2.197612 | 0.040007 | 0.089679 | -4.28701 |
| SGK223    | 0.897362 | -0.10218 | 2.197416 | 0.040023 | 0.089704 | -4.28737 |
| RIBC2     | 0.530222 | -0.25135 | 2.197365 | 0.040027 | 0.089704 | -4.28746 |
| ENPP5     | 0.891248 | -0.47672 | 2.078804 | 0.060009 | 0.122178 | -4.29144 |
| SIAH3     | 0.931401 | -0.5018  | 2.145665 | 0.048831 | 0.10434  | -4.29255 |
| KIRREL3-A | 0.37644  | -0.40865 | 2.194432 | 0.040266 | 0.09021  | -4.29276 |
| TM9SF4    | -0.23272 | 0.250214 | -2.19434 | 0.040273 | 0.090216 | -4.29291 |
| LRP11     | -0.56672 | 0.044364 | -2.19291 | 0.041056 | 0.091451 | -4.29305 |
| MSMO1     | -0.52823 | 0.15244  | -2.18838 | 0.043012 | 0.094683 | -4.29327 |
| KIAA0319  | 0.604061 | 0.406164 | 2.192745 | 0.04107  | 0.091466 | -4.29334 |
| SIGLEC15  | 0.503026 | -0.25793 | 2.193696 | 0.040326 | 0.090293 | -4.29408 |
| TMEM51    | 0.912337 | -0.31264 | 2.193623 | 0.040332 | 0.090296 | -4.29422 |
| TLR9      | -0.46325 | 0.508433 | -2.19254 | 0.040421 | 0.090475 | -4.29617 |
| KIAA0586  | -0.49469 | -0.07164 | -2.19223 | 0.040446 | 0.09052  | -4.29672 |
| ENPP7     | -0.42116 | -0.02877 | -2.19193 | 0.040471 | 0.090566 | -4.29727 |
| RABL3     | -0.36948 | 0.06922  | -2.19158 | 0.0405   | 0.09062  | -4.2979  |
| FAM133A   | -0.26522 | 0.073837 | -2.19146 | 0.04051  | 0.090631 | -4.29811 |
| MOGAT1    | 0.796861 | -0.33094 | 2.19119  | 0.040532 | 0.090671 | -4.2986  |
| MAGEA2B   | -0.58669 | 0.092634 | -2.19107 | 0.040542 | 0.090683 | -4.29882 |

|           |          |          |          |          |          |          |
|-----------|----------|----------|----------|----------|----------|----------|
| LAS1L     | 0.473771 | -0.07498 | 2.190958 | 0.040551 | 0.090684 | -4.29902 |
| ANAPC5    | -0.38128 | 0.314094 | -2.19095 | 0.040552 | 0.090684 | -4.29903 |
| C1orf31   | -0.83049 | 0.533155 | -2.18941 | 0.041346 | 0.091899 | -4.29931 |
| ULBP1     | 0.726129 | -0.26325 | 2.190715 | 0.040571 | 0.090706 | -4.29946 |
| CTLA4     | -0.85938 | 0.315838 | -2.19067 | 0.040575 | 0.090706 | -4.29954 |
| CDK6      | -0.69886 | 0.894491 | -2.19061 | 0.04058  | 0.090706 | -4.29966 |
| SLC26A2   | -0.58719 | -0.02235 | -2.16506 | 0.045979 | 0.099649 | -4.30005 |
| RAB11FIP3 | 0.56611  | 0.060166 | 2.190385 | 0.040599 | 0.090726 | -4.30005 |
| AP1M1     | -0.3747  | 0.247397 | -2.19028 | 0.040607 | 0.09073  | -4.30024 |
| SYT6      | 0.40533  | -0.13361 | 2.190255 | 0.040609 | 0.09073  | -4.30029 |
| STARD3NL  | -0.70728 | -0.07465 | -2.19007 | 0.040625 | 0.090754 | -4.30062 |
| PCDH20    | -0.39473 | 0.078946 | -2.18969 | 0.040656 | 0.090813 | -4.30131 |
| TMEM53    | 0.470102 | -0.13103 | 2.189436 | 0.040677 | 0.09085  | -4.30177 |
| ADAMTS3   | -1.25626 | 0.437545 | -2.18925 | 0.040692 | 0.090873 | -4.3021  |
| FAM164C   | -0.27609 | 0.205182 | -2.189   | 0.040713 | 0.0909   | -4.30255 |
| CD300LG   | 0.44104  | -0.24989 | 2.188997 | 0.040713 | 0.0909   | -4.30256 |
| KLHL13    | 0.821869 | -0.1559  | 2.109059 | 0.053616 | 0.111888 | -4.30349 |
| TTY21     | 0.722637 | -0.23413 | 2.185054 | 0.042455 | 0.093722 | -4.30366 |
| LOC158960 | -0.35434 | -0.03081 | -2.18696 | 0.04155  | 0.092223 | -4.30368 |
| TDP2      | -0.67989 | 0.704746 | -2.18695 | 0.041551 | 0.092223 | -4.30369 |
| WASF1     | -0.37503 | 0.030638 | -2.18818 | 0.040781 | 0.09103  | -4.30403 |
| DNAJC6    | 0.197516 | -0.03908 | 2.188089 | 0.040788 | 0.091036 | -4.30419 |
| METTL22   | -0.33994 | 0.208948 | -2.18762 | 0.040827 | 0.091112 | -4.30503 |
| ERCC6L    | -0.92219 | 0.587027 | -2.18754 | 0.040834 | 0.091117 | -4.30518 |
| OXA1L     | -0.31502 | 0.163124 | -2.18739 | 0.040847 | 0.091124 | -4.30546 |
| VSIG10    | -0.28302 | 0.069367 | -2.18738 | 0.040847 | 0.091124 | -4.30547 |
| ATG2B     | -0.50206 | 0.167306 | -2.18733 | 0.040851 | 0.091124 | -4.30555 |
| NKAIN4    | -0.58852 | 0.339049 | -2.18681 | 0.040894 | 0.091203 | -4.30649 |
| ABCC10    | 0.432472 | -0.45988 | 2.186797 | 0.040895 | 0.091203 | -4.30652 |
| SLC10A1   | 0.284655 | -0.20804 | 2.186619 | 0.04091  | 0.091225 | -4.30684 |
| KRT27     | -0.32641 | -0.03738 | -2.18457 | 0.04175  | 0.09255  | -4.30794 |
| ZNF681    | -0.65788 | 0.103219 | -2.18556 | 0.040999 | 0.091402 | -4.30875 |
| ACTA1     | -0.63027 | 0.361831 | -2.18523 | 0.041026 | 0.091451 | -4.30935 |
| TCL6      | -0.74269 | 0.630241 | -2.18509 | 0.041037 | 0.091451 | -4.30959 |
| FOXE1     | 0.400889 | -0.18739 | 2.185059 | 0.04104  | 0.091451 | -4.30965 |
| MEX3B     | -0.36435 | 0.072871 | -2.18504 | 0.041041 | 0.091451 | -4.30968 |
| TMEM198   | 0.39373  | -0.04411 | 2.18496  | 0.041048 | 0.091451 | -4.30983 |
| DMKN      | 0.937732 | -0.4404  | 2.011757 | 0.06752  | 0.13385  | -4.30986 |
| LGALS1    | -0.6143  | 0.04346  | -2.18484 | 0.041058 | 0.091451 | -4.31004 |
| C9orf86   | -0.39375 | 0.447408 | -2.18451 | 0.041086 | 0.091472 | -4.31063 |
| GRIN2A    | -0.74502 | 0.246089 | -2.18449 | 0.041087 | 0.091472 | -4.31067 |
| SLC38A3   | 0.356181 | -0.29811 | 2.184483 | 0.041088 | 0.091472 | -4.31069 |
| ZDHHC15   | -0.42902 | 0.085804 | -2.18445 | 0.041091 | 0.091472 | -4.31075 |
| CBLN4     | 0.695768 | -0.17539 | 2.182947 | 0.041886 | 0.092757 | -4.31084 |
| CLIP4     | 0.807529 | -0.36443 | 2.184373 | 0.041097 | 0.091475 | -4.31088 |
| KLF14     | 0.889582 | -0.72009 | 2.184127 | 0.041118 | 0.091511 | -4.31133 |
| RAB8A     | -0.83272 | 0.90505  | -2.18394 | 0.041134 | 0.091536 | -4.31167 |



|           |          |          |          |          |          |          |
|-----------|----------|----------|----------|----------|----------|----------|
| SLC39A12  | 0.407264 | -0.27902 | 2.183557 | 0.041165 | 0.091596 | -4.31235 |
| LOC100501 | -0.64566 | 0.244133 | -2.18345 | 0.041174 | 0.091605 | -4.31254 |
| LOC100501 | -0.63903 | 0.195355 | -2.18337 | 0.041181 | 0.091605 | -4.31269 |
| STX2      | 0.590715 | -0.26822 | 2.183341 | 0.041183 | 0.091605 | -4.31274 |
| GJB6      | -0.60803 | 0.159801 | -2.18138 | 0.042018 | 0.092979 | -4.31364 |
| TMEM200   | -0.55276 | -0.21742 | -2.18277 | 0.041231 | 0.091701 | -4.31377 |
| MGAT2     | -0.43991 | 0.063373 | -2.18194 | 0.041301 | 0.091845 | -4.31526 |
| LGALS9    | -0.55586 | 0.732851 | -2.1817  | 0.04132  | 0.091868 | -4.31568 |
| PRRT3     | 0.545802 | -0.28469 | 2.181533 | 0.041335 | 0.091889 | -4.31599 |
| LOC100501 | -0.72295 | 0.285883 | -2.18137 | 0.041348 | 0.091899 | -4.31628 |
| DCUN1D2   | -0.77822 | 0.326845 | -2.18105 | 0.041375 | 0.091937 | -4.31685 |
| KCMF1     | -0.34852 | 0.078629 | -2.181   | 0.04138  | 0.091937 | -4.31695 |
| KLHL30    | 0.500515 | -0.27515 | 2.180831 | 0.041394 | 0.091948 | -4.31725 |
| CYP2R1    | -0.48885 | 0.166321 | -2.18082 | 0.041394 | 0.091948 | -4.31726 |
| C19orf46  | 0.370146 | -0.29442 | 2.180752 | 0.0414   | 0.091951 | -4.3174  |
| ZFYVE9    | 0.459711 | -0.57177 | 2.180469 | 0.041424 | 0.091994 | -4.3179  |
| LOC100501 | 0.719658 | -0.28877 | 2.180355 | 0.041434 | 0.092005 | -4.31811 |
| ZIC3      | -0.50275 | 0.091462 | -2.17857 | 0.042255 | 0.093396 | -4.31864 |
| SEMA3D    | 0.682471 | -0.18968 | 2.130179 | 0.049164 | 0.104823 | -4.32004 |
| RFC1      | -0.44705 | 0.416162 | -2.17919 | 0.041532 | 0.092212 | -4.32021 |
| DENND1B   | -0.33377 | 0.099506 | -2.179   | 0.041548 | 0.092223 | -4.32055 |
| C1orf21   | -1.0185  | 0.225743 | -2.17846 | 0.041593 | 0.092306 | -4.32151 |
| EDA       | 0.385818 | -0.11234 | 2.178127 | 0.041621 | 0.092358 | -4.32211 |
| PLCB1     | 0.425191 | -0.18282 | 2.17782  | 0.041647 | 0.092405 | -4.32267 |
| C21orf90  | -0.43291 | 0.172532 | -2.17625 | 0.042452 | 0.093722 | -4.32277 |
| ADRM1     | -0.33523 | 0.447713 | -2.17757 | 0.041668 | 0.092437 | -4.32312 |
| LRPAP1    | -0.76221 | 0.408661 | -2.17715 | 0.041704 | 0.09249  | -4.32387 |
| KPNA3     | -0.62057 | 0.361778 | -2.1769  | 0.041724 | 0.092525 | -4.32431 |
| ELN       | 0.328558 | -0.27244 | 2.176681 | 0.041743 | 0.09255  | -4.32471 |
| IRF8      | -0.80108 | 0.825569 | -2.17665 | 0.041746 | 0.09255  | -4.32477 |
| LCN8      | 0.490482 | -0.34449 | 2.176363 | 0.04177  | 0.092584 | -4.32528 |
| KCNQ2     | -0.43271 | 0.113458 | -2.17622 | 0.041782 | 0.0926   | -4.32553 |
| IL23A     | 1.016676 | -0.57956 | 2.17594  | 0.041806 | 0.092634 | -4.32604 |
| SLC25A15  | 0.439837 | -0.44902 | 2.175928 | 0.041807 | 0.092634 | -4.32606 |
| DLL1      | 0.739761 | -0.08305 | 2.175783 | 0.041819 | 0.092651 | -4.32632 |
| SIAH1     | -0.54719 | 0.177693 | -2.17549 | 0.041844 | 0.092695 | -4.32684 |
| PLXNB2    | 0.703498 | -0.17977 | 2.175256 | 0.041864 | 0.092729 | -4.32727 |
| RPL7A     | 0.684623 | -0.42738 | 2.175085 | 0.041878 | 0.092751 | -4.32758 |
| RELL1     | 0.503355 | -0.53013 | 2.174803 | 0.041902 | 0.092783 | -4.32808 |
| CYP2C19   | 0.721725 | -0.22084 | 2.174628 | 0.041917 | 0.092805 | -4.3284  |
| WBP11     | 0.447645 | -0.21593 | 2.174575 | 0.041922 | 0.092805 | -4.32849 |
| ARMC6     | 0.316736 | -0.16906 | 2.174    | 0.041971 | 0.092902 | -4.32952 |
| SORCS3    | -0.76626 | 0.199993 | -2.16762 | 0.044795 | 0.097698 | -4.32952 |
| CASQ1     | -0.35816 | 0.05001  | -2.17391 | 0.041978 | 0.092909 | -4.32968 |
| TNS4      | -0.45652 | 0.04939  | -2.17342 | 0.04202  | 0.092979 | -4.33055 |
| SIAH2     | 0.88179  | -0.23554 | 2.173297 | 0.04203  | 0.092993 | -4.33078 |
| ACOT4     | 0.743127 | -0.28765 | 2.173036 | 0.042053 | 0.093031 | -4.33125 |

|           |          |          |          |          |          |          |
|-----------|----------|----------|----------|----------|----------|----------|
| ZBTB41    | -0.63484 | 0.229709 | -2.17127 | 0.042879 | 0.094454 | -4.33164 |
| STAC3     | -0.45379 | 0.214726 | -2.1728  | 0.042073 | 0.093066 | -4.33168 |
| CLN6      | 0.366854 | -0.1595  | 2.172716 | 0.04208  | 0.093071 | -4.33183 |
| SCO2      | -0.58312 | 0.471902 | -2.17247 | 0.042101 | 0.093107 | -4.33228 |
| LOC15221  | -0.49413 | 0.272981 | -2.17233 | 0.042113 | 0.093122 | -4.33251 |
| TMEM202   | 0.780653 | -0.63346 | 2.051102 | 0.061198 | 0.124055 | -4.33305 |
| CLDN8     | 0.606271 | -0.44983 | 2.148795 | 0.045613 | 0.099049 | -4.33352 |
| LOC10050  | 0.822101 | -0.21313 | 2.171501 | 0.042184 | 0.093268 | -4.33401 |
| DGKI      | -0.64836 | 0.262554 | -2.1493  | 0.044804 | 0.097707 | -4.33427 |
| LOC64262  | -0.43678 | 0.087355 | -2.17119 | 0.04221  | 0.093316 | -4.33456 |
| ARL1      | -0.72663 | 0.22492  | -2.17076 | 0.042247 | 0.093387 | -4.33533 |
| LINC00310 | -0.61408 | 0.297321 | -2.17058 | 0.042262 | 0.093399 | -4.33565 |
| EFEMP1    | 0.697603 | -0.24562 | 2.170312 | 0.042285 | 0.09344  | -4.33614 |
| HLA-DOA   | -0.57734 | 0.538209 | -2.17002 | 0.04231  | 0.093485 | -4.33666 |
| MUTED     | -0.62986 | -0.04763 | -2.16983 | 0.042326 | 0.09351  | -4.33699 |
| DDX19A    | 0.825215 | -0.21368 | 2.169752 | 0.042333 | 0.093514 | -4.33714 |
| JTB       | -0.37603 | 0.186747 | -2.1697  | 0.042338 | 0.093514 | -4.33724 |
| ACOX2     | -0.88584 | 0.919498 | -2.16933 | 0.042369 | 0.093573 | -4.33789 |
| KLHL7     | -0.67414 | 0.150996 | -2.16866 | 0.042426 | 0.093689 | -4.33909 |
| LOC10013  | -0.52311 | 0.404279 | -2.16852 | 0.042439 | 0.093706 | -4.33935 |
| PLEKHG2   | -0.39225 | 0.424553 | -2.16826 | 0.042461 | 0.093723 | -4.33981 |
| NDNL2     | -0.47992 | 0.368006 | -2.16808 | 0.042477 | 0.093748 | -4.34014 |
| FGF10     | 0.472582 | -0.16706 | 2.16741  | 0.042534 | 0.093864 | -4.34134 |
| LOC10065  | -0.45703 | 0.05577  | -2.16696 | 0.042573 | 0.093938 | -4.34214 |
| ABI2      | 0.370838 | 0.042228 | 2.166722 | 0.042593 | 0.093973 | -4.34257 |
| DDX5      | -0.56109 | 0.039683 | -2.16629 | 0.042631 | 0.094045 | -4.34335 |
| SERTAD1   | -0.31625 | 0.237738 | -2.16606 | 0.04265  | 0.094078 | -4.34375 |
| PDE5A     | 0.411662 | -0.04469 | 2.165895 | 0.042665 | 0.094099 | -4.34405 |
| C1GALT1   | -0.97865 | 0.385935 | -2.16535 | 0.042712 | 0.094193 | -4.34503 |
| ZNF526    | 0.368123 | -0.14008 | 2.165195 | 0.042725 | 0.094208 | -4.3453  |
| TMEM30B   | 0.409931 | -0.13596 | 2.165119 | 0.042732 | 0.094208 | -4.34544 |
| C5orf56   | -0.66836 | 0.730015 | -2.1651  | 0.042734 | 0.094208 | -4.34548 |
| NSL1      | -0.93988 | 0.311953 | -2.16447 | 0.042788 | 0.094318 | -4.3466  |
| FLJ35946  | 0.437982 | -0.22456 | 2.164136 | 0.042817 | 0.09437  | -4.3472  |
| ZHX1      | -0.54486 | -0.11495 | -2.16364 | 0.042859 | 0.094454 | -4.34808 |
| PLD1      | -1.07905 | 0.666282 | -2.16354 | 0.042868 | 0.094454 | -4.34826 |
| IFFO1     | -0.33941 | 0.175655 | -2.16351 | 0.042871 | 0.094454 | -4.34832 |
| ANKRD6    | -0.45669 | 0.20785  | -2.16347 | 0.042874 | 0.094454 | -4.34838 |
| TIMM8A    | -0.41298 | 0.213961 | -2.16331 | 0.042888 | 0.094463 | -4.34867 |
| PRPF38B   | -1.12315 | 1.282819 | -2.16306 | 0.04291  | 0.094501 | -4.34912 |
| NINL      | 1.099838 | -0.70685 | 2.042043 | 0.066187 | 0.131823 | -4.34931 |
| HNRNPU    | -0.45801 | 0.655157 | -2.16278 | 0.042935 | 0.094545 | -4.34963 |
| STK25     | -0.40098 | 0.383006 | -2.16255 | 0.042954 | 0.094577 | -4.35003 |
| HCG27     | -0.90099 | 0.807976 | -2.16228 | 0.042978 | 0.094618 | -4.35052 |
| SLC5A6    | -0.4659  | 0.661058 | -2.16165 | 0.043033 | 0.094719 | -4.35165 |
| AP1G1     | -0.69609 | 0.671691 | -2.16133 | 0.04306  | 0.094755 | -4.35222 |
| LRRC9     | -0.74084 | 0.34114  | -2.16129 | 0.043064 | 0.094755 | -4.35229 |

|           |          |          |          |          |          |          |
|-----------|----------|----------|----------|----------|----------|----------|
| NOX1      | -0.50219 | 0.093134 | -2.16123 | 0.043069 | 0.094755 | -4.35239 |
| FANK1     | 1.308064 | -0.3958  | 2.07912  | 0.055342 | 0.114638 | -4.35251 |
| EYA3      | -0.53175 | 0.297577 | -2.16109 | 0.043082 | 0.094773 | -4.35265 |
| SPDYE5    | -0.57013 | 0.199042 | -2.16064 | 0.043121 | 0.094845 | -4.35346 |
| JUND      | 0.62366  | 0.025817 | 2.160599 | 0.043124 | 0.094845 | -4.35353 |
| FKSG43    | 0.379629 | -0.38802 | 2.160466 | 0.043136 | 0.09486  | -4.35376 |
| FBXL16    | 1.033145 | -0.50647 | 2.160366 | 0.043144 | 0.094868 | -4.35394 |
| GTPBP5    | -0.47136 | 0.494777 | -2.15986 | 0.043188 | 0.094954 | -4.35484 |
| C1orf159  | -0.40582 | 0.650916 | -2.15967 | 0.043205 | 0.094979 | -4.35519 |
| GABARAPL  | -0.40914 | 0.069444 | -2.15962 | 0.04321  | 0.094979 | -4.35528 |
| ELOF1     | 0.404346 | -0.20471 | 2.159565 | 0.043214 | 0.094979 | -4.35537 |
| F12       | 0.688473 | -0.42655 | 2.159484 | 0.043221 | 0.094983 | -4.35552 |
| ABT1      | 0.499141 | -0.59066 | 2.159432 | 0.043226 | 0.094983 | -4.35561 |
| TFIP11    | -0.4401  | 0.359672 | -2.15926 | 0.04324  | 0.094986 | -4.35591 |
| LOC100501 | -0.52672 | 0.128386 | -2.15924 | 0.043242 | 0.094986 | -4.35595 |
| SLC12A7   | -0.77616 | 0.673392 | -2.15915 | 0.043251 | 0.094986 | -4.35612 |
| C6orf115  | -0.4609  | 0.01235  | -2.15914 | 0.043251 | 0.094986 | -4.35613 |
| DOM3Z     | -0.27156 | 0.431749 | -2.15871 | 0.043289 | 0.095051 | -4.3569  |
| ZNF90     | 0.562725 | -0.28907 | 2.158689 | 0.043291 | 0.095051 | -4.35694 |
| KIAA0226L | -0.70738 | 0.608798 | -2.15863 | 0.043296 | 0.095052 | -4.35704 |
| IL20      | 0.445751 | -0.40521 | 2.109288 | 0.049297 | 0.105061 | -4.35722 |
| ADAM21    | -0.45535 | 0.154315 | -2.15843 | 0.043313 | 0.095079 | -4.35739 |
| MT1L      | 0.704801 | -0.39382 | 2.157993 | 0.043352 | 0.095153 | -4.35818 |
| SPANXB2   | 0.570845 | -0.24934 | 2.107799 | 0.050321 | 0.106857 | -4.3591  |
| DNAI1     | -0.33973 | 0.092012 | -2.15721 | 0.04342  | 0.095293 | -4.35958 |
| OBFC2B    | -0.53866 | 0.503688 | -2.15705 | 0.043434 | 0.095313 | -4.35986 |
| ESCO1     | 0.381123 | -0.17146 | 2.156836 | 0.043453 | 0.095344 | -4.36025 |
| CCDC107   | 0.430607 | -0.04839 | 2.156549 | 0.043478 | 0.095388 | -4.36076 |
| TTY23     | -0.4852  | 0.074757 | -2.14963 | 0.046395 | 0.100305 | -4.36078 |
| TNFAIP8L2 | -0.32553 | 0.127479 | -2.15619 | 0.043509 | 0.095442 | -4.3614  |
| ANKRD13A  | -0.61664 | 0.365316 | -2.15616 | 0.043512 | 0.095442 | -4.36146 |
| PIN1      | -0.26937 | 0.14295  | -2.15577 | 0.043547 | 0.095506 | -4.36215 |
| CHAC2     | -0.491   | 0.171344 | -2.15545 | 0.043575 | 0.095557 | -4.36272 |
| NBR2      | -0.48462 | 0.293878 | -2.15538 | 0.043581 | 0.095561 | -4.36285 |
| MRAP      | 0.396544 | -0.40525 | 2.155297 | 0.043588 | 0.095565 | -4.363   |
| LOC653160 | 0.437506 | -0.13916 | 2.15507  | 0.043608 | 0.095596 | -4.3634  |
| ZNF114    | 0.348057 | -0.05725 | 2.155028 | 0.043612 | 0.095596 | -4.36348 |
| ZNF605    | 1.009008 | -0.36788 | 2.104296 | 0.051658 | 0.108965 | -4.36381 |
| KIF5B     | -0.88713 | 0.622218 | -2.15299 | 0.044475 | 0.097102 | -4.36405 |
| GTF2H2B   | 0.669932 | -0.71829 | 2.1547   | 0.043641 | 0.095648 | -4.36406 |
| PLCG2     | -0.48701 | 0.452446 | -2.15432 | 0.043674 | 0.0957   | -4.36473 |
| SLC35D1   | -0.37938 | 0.48665  | -2.15431 | 0.043676 | 0.0957   | -4.36477 |
| CCDC25    | 0.457798 | -0.17568 | 2.154268 | 0.043679 | 0.0957   | -4.36483 |
| C8orf68   | -0.37736 | 0.048858 | -2.1513  | 0.044625 | 0.097397 | -4.36704 |
| TNNC2     | 0.696155 | 0.026855 | 2.153004 | 0.04379  | 0.095933 | -4.36709 |
| SCLT1     | -0.9142  | 0.950916 | -2.15287 | 0.043802 | 0.095949 | -4.36733 |
| STAM      | -0.60495 | 0.232771 | -2.15277 | 0.043811 | 0.095958 | -4.36751 |

|           |          |          |          |          |          |          |
|-----------|----------|----------|----------|----------|----------|----------|
| CCNA2     | -0.72553 | 0.438379 | -2.15262 | 0.043824 | 0.095975 | -4.36777 |
| GIMAP5    | 0.878907 | -0.397   | 2.152294 | 0.043853 | 0.096028 | -4.36835 |
| MUC6      | 0.504386 | -0.40632 | 2.152173 | 0.043864 | 0.096041 | -4.36857 |
| MXRA5     | -0.6447  | 0.145899 | -2.15099 | 0.043968 | 0.096259 | -4.37067 |
| MUM1L1    | -0.44947 | 0.102438 | -2.14915 | 0.044817 | 0.097724 | -4.37084 |
| ARHGEF38  | 0.321627 | -0.18662 | 2.150563 | 0.044007 | 0.096332 | -4.37144 |
| SSU72     | -0.29294 | 0.232002 | -2.15028 | 0.044032 | 0.096376 | -4.37195 |
| FRMPD4    | 0.573468 | -0.43078 | 2.149441 | 0.044106 | 0.096525 | -4.37344 |
| EIF3C     | 0.506565 | -0.10222 | 2.149366 | 0.044113 | 0.096525 | -4.37357 |
| AFF2      | 0.574489 | -0.37065 | 2.149346 | 0.044115 | 0.096525 | -4.37361 |
| LRCH3     | -0.53703 | 0.252077 | -2.14903 | 0.044142 | 0.096575 | -4.37417 |
| MEX3C     | 0.608036 | -0.89382 | 2.148923 | 0.044152 | 0.096575 | -4.37436 |
| MAP3K2    | -1.50663 | 0.867496 | -2.14885 | 0.044159 | 0.096575 | -4.3745  |
| ZNF710    | -0.69805 | 0.673876 | -2.14885 | 0.044159 | 0.096575 | -4.3745  |
| FBXO27    | 0.272951 | -0.12328 | 2.148813 | 0.044162 | 0.096575 | -4.37456 |
| NLRP8     | -0.35971 | -0.10978 | -2.14864 | 0.044178 | 0.096598 | -4.37487 |
| SEC62     | -0.99554 | 0.589462 | -2.14829 | 0.044209 | 0.096656 | -4.37549 |
| IFITM1    | -0.64611 | 0.41314  | -2.14718 | 0.044307 | 0.09686  | -4.37746 |
| ZNF714    | 0.466447 | -0.28213 | 2.147057 | 0.044319 | 0.096874 | -4.37769 |
| HIST1H1E  | -0.58613 | 0.197093 | -2.14694 | 0.044329 | 0.096882 | -4.3779  |
| SMARCA5   | -0.41439 | -0.02218 | -2.14691 | 0.044332 | 0.096882 | -4.37796 |
| GAPT      | -0.60782 | 0.365973 | -2.14679 | 0.044343 | 0.096884 | -4.37817 |
| DDRGRK1   | -0.33479 | 0.268963 | -2.14679 | 0.044343 | 0.096884 | -4.37817 |
| SMC4      | -0.65151 | 0.220377 | -2.14659 | 0.044361 | 0.096912 | -4.37852 |
| LEP       | 1.218725 | -1.0174  | 2.0631   | 0.054848 | 0.113845 | -4.37856 |
| HOXC13    | 0.679636 | -0.53411 | 2.062107 | 0.059998 | 0.122178 | -4.37862 |
| ZNF624    | -0.74615 | 0.212034 | -2.14475 | 0.045213 | 0.0984   | -4.37862 |
| HEMK1     | -1.04358 | 0.990458 | -2.14645 | 0.044373 | 0.096927 | -4.37876 |
| ZNF665    | -0.51935 | 0.149856 | -2.14612 | 0.044403 | 0.096982 | -4.37936 |
| NOC2L     | -0.52582 | 0.599718 | -2.14597 | 0.044416 | 0.097    | -4.37962 |
| PSMA3     | -0.6399  | 0.306792 | -2.14562 | 0.044448 | 0.097058 | -4.38025 |
| STARD3    | -0.74097 | 0.736319 | -2.14528 | 0.044478 | 0.097102 | -4.38085 |
| NBPF10    | -0.42238 | 0.119392 | -2.14518 | 0.044487 | 0.097111 | -4.38103 |
| SYK       | -0.44132 | 0.243985 | -2.14361 | 0.044627 | 0.097397 | -4.38382 |
| C11orf85  | 0.491888 | -0.30173 | 2.138921 | 0.04651  | 0.100509 | -4.38472 |
| FAM189A2  | -0.51762 | -0.21159 | -2.14307 | 0.044676 | 0.097492 | -4.38478 |
| MED29     | -0.3794  | 0.158756 | -2.14274 | 0.044706 | 0.097543 | -4.38537 |
| CFHR3     | -0.82509 | 0.013014 | -2.1427  | 0.044709 | 0.097543 | -4.38544 |
| LOC100507 | -0.59544 | -0.09916 | -2.09285 | 0.050908 | 0.107825 | -4.38546 |
| IPO8      | -0.84638 | 0.800026 | -2.14245 | 0.044732 | 0.097581 | -4.38588 |
| MX2       | -0.74449 | 0.762464 | -2.14226 | 0.044749 | 0.097609 | -4.38623 |
| E2F7      | -0.88645 | 0.575597 | -2.14144 | 0.044823 | 0.097726 | -4.38768 |
| UPP2      | 0.347841 | -0.14562 | 2.14116  | 0.044848 | 0.09777  | -4.38818 |
| KCNS3     | 0.277431 | -0.07186 | 2.136776 | 0.046707 | 0.100834 | -4.38847 |
| SNTN      | 0.305052 | -0.11515 | 2.140417 | 0.044915 | 0.097906 | -4.3895  |
| MRPS34    | 0.36383  | -0.12885 | 2.140079 | 0.044946 | 0.097961 | -4.3901  |
| CDH6      | -0.34378 | 0.104266 | -2.13992 | 0.04496  | 0.097982 | -4.39038 |

|          |          |          |          |          |          |          |
|----------|----------|----------|----------|----------|----------|----------|
| LOC33935 | 0.316714 | 0.050463 | 2.139658 | 0.044984 | 0.098023 | -4.39085 |
| SLFNL1   | -0.3183  | 0.207459 | -2.13861 | 0.045079 | 0.098198 | -4.39272 |
| RNF208   | 0.78786  | -0.23585 | 2.138347 | 0.045103 | 0.098227 | -4.39318 |
| STK38    | -0.57353 | 0.35191  | -2.13827 | 0.04511  | 0.098227 | -4.39331 |
| MYBPC2   | 0.733836 | -0.30659 | 2.138264 | 0.04511  | 0.098227 | -4.39333 |
| MED7     | 0.653547 | -0.20824 | 2.138234 | 0.045113 | 0.098227 | -4.39338 |
| CSK      | -0.41134 | 0.472657 | -2.1374  | 0.045189 | 0.098382 | -4.39487 |
| BRPF1    | -0.42087 | 0.482326 | -2.13734 | 0.045194 | 0.098382 | -4.39497 |
| TBX5     | 0.757382 | -0.0832  | 2.137262 | 0.045202 | 0.098387 | -4.39511 |
| MYLK3    | 0.736912 | -0.16376 | 2.132478 | 0.047103 | 0.10147  | -4.39596 |
| NLGN2    | 0.30142  | -0.26427 | 2.13661  | 0.045261 | 0.098494 | -4.39626 |
| KIF23    | 0.522581 | -0.2504  | 2.136174 | 0.045301 | 0.098566 | -4.39704 |
| KIAA0196 | -0.24223 | -0.12541 | -2.13614 | 0.045304 | 0.098566 | -4.3971  |
| VEGFA    | -0.8931  | 0.888548 | -2.13589 | 0.045327 | 0.098605 | -4.39755 |
| COL18A1  | -0.66013 | 0.576661 | -2.13579 | 0.045336 | 0.098612 | -4.39772 |
| PYCARD   | -0.40058 | 0.326669 | -2.13574 | 0.04534  | 0.098612 | -4.39781 |
| VPS28    | 0.397657 | -0.09312 | 2.135647 | 0.045349 | 0.098619 | -4.39797 |
| RNF151   | 0.386827 | -0.40492 | 2.135431 | 0.045368 | 0.098651 | -4.39836 |
| WHSC1    | -0.5452  | 0.611931 | -2.13512 | 0.045397 | 0.098703 | -4.39891 |
| SASS6    | 0.807892 | -0.23353 | 2.134309 | 0.045471 | 0.098844 | -4.40035 |
| ZNF259P1 | -0.36949 | 0.021407 | -2.13429 | 0.045472 | 0.098844 | -4.40038 |
| SPRY4    | -0.58989 | 0.125034 | -2.13238 | 0.04634  | 0.100209 | -4.40042 |
| ZKSCAN4  | -0.40526 | 0.192525 | -2.13419 | 0.045482 | 0.09885  | -4.40056 |
| C6orf223 | -0.53477 | 0.344895 | -2.13416 | 0.045485 | 0.09885  | -4.40062 |
| AKIRIN1  | -1.47251 | 0.624014 | -2.1339  | 0.045509 | 0.098886 | -4.40108 |
| SPPL3    | -0.769   | 0.229608 | -2.13386 | 0.045512 | 0.098886 | -4.40114 |
| IL17RD   | -0.5337  | 0.150795 | -2.13368 | 0.045528 | 0.0989   | -4.40146 |
| GCSH     | 0.579405 | -0.56926 | 2.132989 | 0.045592 | 0.099016 | -4.40269 |
| TYW1     | -0.71932 | 0.34063  | -2.13271 | 0.045617 | 0.099049 | -4.40318 |
| TBX1     | 0.615993 | -0.06859 | 2.132427 | 0.045643 | 0.099095 | -4.40369 |
| MIR100HG | -0.34048 | 0.068096 | -2.13219 | 0.045665 | 0.099131 | -4.40411 |
| MSR1     | -0.747   | 0.432273 | -2.13125 | 0.045751 | 0.099289 | -4.40577 |
| NGRN     | -0.62457 | 0.721956 | -2.13123 | 0.045753 | 0.099289 | -4.40581 |
| COL17A1  | 0.584634 | 0.046012 | 2.131078 | 0.045767 | 0.099309 | -4.40608 |
| STIL     | 0.519209 | -0.2012  | 2.128973 | 0.046655 | 0.100745 | -4.4064  |
| LRRC71   | 0.37105  | -0.04133 | 2.130503 | 0.04582  | 0.099413 | -4.4071  |
| TAS2R10  | -0.22668 | -0.0424  | -2.13039 | 0.04583  | 0.099424 | -4.40729 |
| ACTR1A   | -0.42587 | 0.313118 | -2.13007 | 0.04586  | 0.099478 | -4.40787 |
| ZNF726   | -0.69462 | 0.244076 | -2.12966 | 0.045897 | 0.099542 | -4.40859 |
| PODXL    | 0.292012 | -0.21349 | 2.129589 | 0.045904 | 0.099542 | -4.40872 |
| GPR132   | -0.94954 | 0.874877 | -2.12958 | 0.045905 | 0.099542 | -4.40873 |
| LZTFL1   | -0.77784 | -0.0188  | -2.1293  | 0.045931 | 0.099588 | -4.40923 |
| SDCBP2   | -0.42582 | 0.286907 | -2.1292  | 0.04594  | 0.099596 | -4.40941 |
| FHOD3    | 0.453787 | -0.12417 | 2.127195 | 0.04682  | 0.101    | -4.40953 |
| ME3      | 0.841548 | -0.23395 | 2.128952 | 0.045963 | 0.099635 | -4.40985 |
| LRRC61   | -0.46734 | 0.653428 | -2.12874 | 0.045982 | 0.099649 | -4.41022 |
| CACNA1F  | 0.424295 | -0.15707 | 2.128716 | 0.045985 | 0.099649 | -4.41026 |

|           |          |          |          |          |          |          |
|-----------|----------|----------|----------|----------|----------|----------|
| CDK2AP2   | -0.37495 | 0.520818 | -2.12857 | 0.045998 | 0.099667 | -4.41052 |
| LOC100506 | -0.6599  | 0.999791 | -2.12793 | 0.046057 | 0.099784 | -4.41166 |
| VSTM4     | -0.40942 | 0.113421 | -2.12752 | 0.046095 | 0.099848 | -4.41238 |
| KBTBD12   | -0.70779 | 0.236781 | -2.1275  | 0.046097 | 0.099848 | -4.41241 |
| LOC100125 | 0.491791 | 0.005482 | 2.127417 | 0.046105 | 0.099854 | -4.41256 |
| HHAT      | 0.519419 | -0.06159 | 2.076047 | 0.0535   | 0.111698 | -4.41301 |
| FCN1      | -0.60448 | 0.584453 | -2.12703 | 0.04614  | 0.099914 | -4.41325 |
| UPK2      | -0.53217 | 0.273589 | -2.127   | 0.046143 | 0.099914 | -4.41329 |
| IL11RA    | 0.628952 | -0.30985 | 2.12695  | 0.046148 | 0.099914 | -4.41339 |
| UCK1      | -0.39267 | 0.293431 | -2.12673 | 0.046169 | 0.099938 | -4.41379 |
| TRIM52    | -0.43466 | 0.212178 | -2.12672 | 0.046169 | 0.099938 | -4.41379 |
| GAS2L3    | 0.52324  | -0.15947 | 2.124633 | 0.047059 | 0.101406 | -4.41402 |
| MRPS22    | -0.57117 | -0.11531 | -2.12622 | 0.046216 | 0.100025 | -4.41469 |
| SMAD7     | 0.518306 | -0.25441 | 2.126177 | 0.04622  | 0.100025 | -4.41476 |
| CCDC101   | -0.51799 | 0.560977 | -2.12602 | 0.046235 | 0.100046 | -4.41504 |
| C6orf174  | 0.705702 | 0.110388 | 2.124019 | 0.047117 | 0.10147  | -4.4151  |
| LOC100505 | 0.511405 | -0.2393  | 2.125827 | 0.046252 | 0.100074 | -4.41538 |
| GOLT1B    | -0.41967 | 0.071672 | -2.12566 | 0.046268 | 0.100096 | -4.41567 |
| UBTF      | -0.61193 | 0.780549 | -2.1253  | 0.046302 | 0.100158 | -4.41632 |
| DGAT2     | -0.96707 | 0.705652 | -2.12509 | 0.046321 | 0.100189 | -4.41669 |
| CHRM5     | 0.571931 | -0.12159 | 2.124889 | 0.046339 | 0.100209 | -4.41704 |
| PDCD6IP   | -1.2596  | 1.059926 | -2.12456 | 0.04637  | 0.100262 | -4.41762 |
| WDFY3-AS  | -0.87957 | 0.70091  | -2.12357 | 0.046462 | 0.10044  | -4.41938 |
| C9orf135  | 0.468366 | -0.06372 | 2.123488 | 0.04647  | 0.100445 | -4.41952 |
| RIPK4     | 0.321566 | -0.18122 | 2.123141 | 0.046502 | 0.100504 | -4.42013 |
| RAD54L    | -0.74947 | 0.812687 | -2.12281 | 0.046533 | 0.100544 | -4.42071 |
| CES3      | 0.255051 | -0.31939 | 2.122725 | 0.046541 | 0.100544 | -4.42087 |
| USP7      | -0.31743 | 0.180572 | -2.12272 | 0.046541 | 0.100544 | -4.42087 |
| HMGCR     | -0.54124 | -0.05866 | -2.12254 | 0.046558 | 0.100569 | -4.42119 |
| FBXO42    | -0.30434 | 0.210635 | -2.1223  | 0.04658  | 0.100606 | -4.42161 |
| GAN       | -0.22659 | 0.02992  | -2.12204 | 0.046605 | 0.100648 | -4.42207 |
| OR5P3     | -0.53641 | 0.185738 | -2.12137 | 0.046667 | 0.10076  | -4.42325 |
| BMP5      | -0.4175  | 0.225805 | -2.12078 | 0.046724 | 0.100859 | -4.42431 |
| PVRIG     | 0.940342 | -0.32783 | 2.12055  | 0.046745 | 0.100894 | -4.42471 |
| TMEM139   | -0.56269 | 0.055085 | -2.12021 | 0.046777 | 0.100952 | -4.42532 |
| TPI1P2    | -0.26402 | 0.019752 | -2.12003 | 0.046793 | 0.100968 | -4.42563 |
| ZNF177    | -1.15324 | 0.620526 | -2.12002 | 0.046794 | 0.100968 | -4.42565 |
| TMEM86B   | 0.625541 | 0.02777  | 2.119851 | 0.04681  | 0.100991 | -4.42595 |
| MCM6      | -0.60071 | 0.505824 | -2.11969 | 0.046826 | 0.101    | -4.42624 |
| PNMA1     | 0.544973 | -0.3063  | 2.11964  | 0.04683  | 0.101    | -4.42632 |
| ZNF563    | -0.57603 | 0.223214 | -2.11948 | 0.046845 | 0.101021 | -4.4266  |
| MUC12     | -0.32696 | 0.035322 | -2.1192  | 0.046872 | 0.101068 | -4.4271  |
| CA5BP1    | -0.55597 | 0.677779 | -2.1187  | 0.046918 | 0.101146 | -4.42798 |
| GPR162    | 0.77265  | 0.068464 | 2.118654 | 0.046923 | 0.101146 | -4.42806 |
| CAPRIN2   | -0.63414 | 0.399644 | -2.11865 | 0.046923 | 0.101146 | -4.42808 |
| SERPINE2  | -0.4968  | 0.299125 | -2.11842 | 0.046945 | 0.101181 | -4.42848 |
| CST1      | -0.42634 | -0.05865 | -2.11554 | 0.047917 | 0.10281  | -4.42996 |

|           |          |          |          |          |          |          |
|-----------|----------|----------|----------|----------|----------|----------|
| TMEM204   | 1.231261 | -0.54764 | 2.117525 | 0.047029 | 0.101351 | -4.43005 |
| NR3C2     | 1.160664 | -0.82413 | 1.9866   | 0.075435 | 0.146127 | -4.43084 |
| FBXL4     | -0.76732 | 0.302616 | -2.11663 | 0.047113 | 0.10147  | -4.43163 |
| DENND3    | -0.50844 | 0.313725 | -2.11651 | 0.047125 | 0.10147  | -4.43184 |
| EDEM3     | -0.76677 | 0.022799 | -2.11651 | 0.047125 | 0.10147  | -4.43185 |
| HTR1E     | -0.29645 | -0.01719 | -2.11651 | 0.047125 | 0.10147  | -4.43185 |
| ZIC5      | 0.419385 | -0.35525 | 2.116502 | 0.047125 | 0.10147  | -4.43186 |
| KCNH5     | 0.739713 | -0.40266 | 2.093441 | 0.050059 | 0.10641  | -4.43197 |
| SEC16B    | 0.549481 | -0.21791 | 2.116366 | 0.047138 | 0.101486 | -4.4321  |
| SHROOM3   | -0.51553 | 0.12482  | -2.11629 | 0.047146 | 0.101491 | -4.43224 |
| PVRL3     | 0.380544 | -0.00644 | 2.115433 | 0.047227 | 0.101654 | -4.43375 |
| KNTC1     | -0.68443 | 0.423072 | -2.11535 | 0.047235 | 0.10166  | -4.4339  |
| ZFAND6    | -0.44609 | -0.25993 | -2.11524 | 0.047245 | 0.101671 | -4.43409 |
| AGRP      | 0.579607 | -0.36173 | 2.114962 | 0.047271 | 0.101716 | -4.43458 |
| CRTC2     | -0.35544 | 0.350981 | -2.11485 | 0.047282 | 0.101728 | -4.43478 |
| DCHS1     | 0.719404 | 0.042109 | 2.114729 | 0.047293 | 0.101733 | -4.43499 |
| S1PR3     | 0.324411 | -0.33008 | 2.11421  | 0.047342 | 0.101807 | -4.43591 |
| LOC100655 | -0.77645 | 0.676985 | -2.11416 | 0.047347 | 0.101807 | -4.43599 |
| SFPQ      | 1.12527  | -0.20175 | 2.114154 | 0.047348 | 0.101807 | -4.436   |
| SPAG4     | -0.46813 | 0.437105 | -2.11414 | 0.047349 | 0.101807 | -4.43604 |
| NOD2      | -0.76477 | 0.617    | -2.11384 | 0.047377 | 0.101856 | -4.43656 |
| GPATCH1   | -0.49794 | 0.473837 | -2.11375 | 0.047386 | 0.101863 | -4.43671 |
| DCLK3     | -0.77628 | 0.286104 | -2.11161 | 0.048292 | 0.103447 | -4.43684 |
| LOC100506 | -0.57664 | 0.440103 | -2.11352 | 0.047408 | 0.101898 | -4.43712 |
| HSD11B2   | 0.265236 | -0.05384 | 2.110789 | 0.04837  | 0.103545 | -4.43827 |
| ZNF286A   | -0.32941 | 0.065883 | -2.11274 | 0.047482 | 0.102048 | -4.4385  |
| PSMA4     | -0.73482 | -0.43062 | -2.11262 | 0.047493 | 0.102058 | -4.43871 |
| OR10J1    | -0.28313 | 0.051634 | -2.11257 | 0.047498 | 0.102058 | -4.43879 |
| HCG23     | 0.37394  | -0.16239 | 2.11216  | 0.047537 | 0.102132 | -4.43952 |
| MOV10     | -0.77404 | 0.904412 | -2.11191 | 0.047561 | 0.102171 | -4.43996 |
| BCL6B     | 0.508089 | -0.24526 | 2.111287 | 0.04762  | 0.102288 | -4.44106 |
| ACBD7     | 0.373732 | -0.8684  | 2.111062 | 0.047642 | 0.102323 | -4.44146 |
| LOC100133 | -0.73711 | 0.24028  | -2.11087 | 0.04766  | 0.10235  | -4.44179 |
| PRH1-PRR4 | -0.6952  | 0.027903 | -2.10605 | 0.049611 | 0.105626 | -4.44187 |
| SYDE2     | 0.659019 | -0.2891  | 2.084199 | 0.052667 | 0.110444 | -4.44196 |
| GLT8D1    | -0.51134 | 0.149365 | -2.11075 | 0.047671 | 0.102364 | -4.442   |
| NRG2      | -0.70348 | 0.077313 | -2.11065 | 0.047681 | 0.102373 | -4.44217 |
| NFIL3     | -0.82057 | 0.637704 | -2.11035 | 0.04771  | 0.102425 | -4.44272 |
| SMYD3     | 0.490779 | -0.0782  | 2.109494 | 0.047792 | 0.102588 | -4.44422 |
| KHDRBS1   | -0.34445 | 0.220412 | -2.1089  | 0.047848 | 0.102698 | -4.44526 |
| SPRR2C    | -0.39122 | 0.150887 | -2.10838 | 0.047898 | 0.102795 | -4.44618 |
| VPS13D    | -0.47908 | 0.303934 | -2.10829 | 0.047906 | 0.102801 | -4.44633 |
| EPB41L4A  | 0.538826 | -0.24691 | 2.108125 | 0.047923 | 0.10281  | -4.44663 |
| SLC45A2   | -0.31238 | 0.012058 | -2.10809 | 0.047926 | 0.10281  | -4.4467  |
| C7orf33   | 0.863088 | -0.18628 | 2.084209 | 0.050979 | 0.107918 | -4.44797 |
| C5orf25   | -0.56302 | 0.399144 | -2.10727 | 0.048005 | 0.102963 | -4.44814 |
| KCNJ8     | 0.378483 | -0.17512 | 2.107195 | 0.048012 | 0.102963 | -4.44827 |

|           |          |          |          |          |          |          |
|-----------|----------|----------|----------|----------|----------|----------|
| FEZ2      | -0.43456 | 0.063286 | -2.10718 | 0.048013 | 0.102963 | -4.44829 |
| LOC100501 | 0.645562 | -0.02342 | 2.106786 | 0.048051 | 0.103033 | -4.44899 |
| ITGA10    | 0.833699 | -0.3836  | 1.975576 | 0.065863 | 0.13131  | -4.44988 |
| TP53I13   | -0.48715 | 0.754319 | -2.10616 | 0.048112 | 0.103152 | -4.4501  |
| GSDMA     | 0.394958 | -0.27081 | 2.106062 | 0.048121 | 0.10316  | -4.45026 |
| AMZ2P1    | -0.54068 | 0.17232  | -2.10592 | 0.048135 | 0.103168 | -4.45052 |
| ENO1-AS1  | -0.49582 | 0.255049 | -2.10591 | 0.048135 | 0.103168 | -4.45053 |
| GAD2      | -0.64192 | 0.227328 | -2.10374 | 0.04905  | 0.104683 | -4.45059 |
| LINC00339 | -0.62741 | 0.078206 | -2.1055  | 0.048175 | 0.103242 | -4.45125 |
| GP2       | 0.793923 | -0.21512 | 2.019145 | 0.059659 | 0.121613 | -4.45175 |
| C12orf34  | 0.339195 | -0.14894 | 2.104942 | 0.048229 | 0.103346 | -4.45223 |
| SMPX      | 0.546705 | -0.42095 | 2.102563 | 0.049164 | 0.104823 | -4.45264 |
| POM121    | -0.40691 | 0.391043 | -2.1045  | 0.048271 | 0.103425 | -4.453   |
| LDHB      | 0.937138 | -0.28252 | 2.104403 | 0.048281 | 0.103435 | -4.45318 |
| PLD5      | -0.55176 | 0.194047 | -2.10401 | 0.048318 | 0.103482 | -4.45386 |
| SERF1B    | 0.591495 | -0.44175 | 2.104009 | 0.048319 | 0.103482 | -4.45387 |
| SYNE2     | 0.895548 | -1.05589 | 2.103681 | 0.04835  | 0.103537 | -4.45445 |
| OSBPL6    | -0.39136 | 0.019813 | -2.10363 | 0.048355 | 0.103537 | -4.45454 |
| RLN1      | -0.81923 | 0.008553 | -2.07675 | 0.053427 | 0.111605 | -4.4546  |
| C4orf37   | 0.706475 | -0.21485 | 2.103533 | 0.048365 | 0.103545 | -4.45471 |
| ZNF804B   | 0.817639 | -0.11541 | 2.103357 | 0.048382 | 0.103545 | -4.45502 |
| SKIV2L2   | -0.51552 | 0.051435 | -2.10335 | 0.048383 | 0.103545 | -4.45504 |
| POLR1C    | -0.4741  | 0.454539 | -2.10332 | 0.048385 | 0.103545 | -4.45508 |
| C1orf124  | -0.25205 | 0.238471 | -2.1031  | 0.048406 | 0.103579 | -4.45547 |
| KIF21B    | -0.35971 | 0.466127 | -2.10253 | 0.048462 | 0.103686 | -4.45647 |
| PPP2R3A   | 0.755293 | -0.39752 | 1.971529 | 0.067571 | 0.133911 | -4.45698 |
| NAAA      | 0.65875  | -0.4354  | 2.101924 | 0.048521 | 0.103801 | -4.45754 |
| RHBDD1    | -0.46764 | 0.322359 | -2.10168 | 0.048544 | 0.10384  | -4.45797 |
| IDI2      | 0.371723 | -0.27244 | 2.101492 | 0.048562 | 0.103868 | -4.4583  |
| TAPBP     | -0.40875 | 0.360292 | -2.1014  | 0.048572 | 0.103876 | -4.45847 |
| TSSK3     | 0.272479 | -0.19083 | 2.100879 | 0.048622 | 0.103972 | -4.45937 |
| CLEC2L    | 1.389743 | -0.00226 | 2.077442 | 0.051664 | 0.108967 | -4.45967 |
| ANKRD42   | -0.64149 | 0.317222 | -2.10069 | 0.048641 | 0.104001 | -4.45971 |
| MIIP      | -0.49251 | 0.476142 | -2.10052 | 0.048657 | 0.104025 | -4.46001 |
| TGFBR1    | -0.61217 | 0.289393 | -2.09997 | 0.048711 | 0.104128 | -4.46098 |
| LIPF      | -0.33197 | 0.066395 | -2.09982 | 0.048725 | 0.104146 | -4.46123 |
| ZNF407    | -0.73773 | 0.287788 | -2.09931 | 0.048775 | 0.104242 | -4.46213 |
| C9orf142  | 0.42252  | -0.13021 | 2.098742 | 0.04883  | 0.10434  | -4.46313 |
| VIP       | -0.31691 | 0.1171   | -2.09823 | 0.04888  | 0.104432 | -4.46402 |
| LOC727983 | -0.46559 | -0.07476 | -2.09314 | 0.05088  | 0.107801 | -4.46417 |
| PLXNC1    | -1.24539 | 0.82624  | -2.09807 | 0.048895 | 0.104451 | -4.46431 |
| PARK7     | -0.28085 | 0.245754 | -2.09803 | 0.048899 | 0.104451 | -4.46437 |
| FAM120C   | 0.467416 | 0.070071 | 2.097337 | 0.048967 | 0.104585 | -4.4656  |
| KIAA0317  | -0.47318 | 0.175065 | -2.097   | 0.049    | 0.104644 | -4.46618 |
| RNF11     | 0.59181  | -0.86259 | 2.096733 | 0.049026 | 0.10468  | -4.46665 |
| RNF149    | -0.73124 | 0.395517 | -2.09672 | 0.049027 | 0.10468  | -4.46668 |
| SRPRB     | 0.561157 | -0.29772 | 2.09664  | 0.049035 | 0.104683 | -4.46682 |



|           |          |          |          |          |          |          |
|-----------|----------|----------|----------|----------|----------|----------|
| MSMB      | 0.718656 | -0.04852 | 2.096597 | 0.04904  | 0.104683 | -4.46689 |
| DYNC1LI1  | -0.63637 | 0.195925 | -2.09654 | 0.049045 | 0.104683 | -4.467   |
| JHDM1D    | 0.326222 | -0.50689 | 2.09624  | 0.049074 | 0.104723 | -4.46752 |
| CCDC149   | 0.698277 | -0.07759 | 2.095979 | 0.0491   | 0.104766 | -4.46798 |
| IMP3      | 0.449848 | -0.21377 | 2.095903 | 0.049108 | 0.104771 | -4.46811 |
| LINC00421 | 0.375681 | -0.42041 | 2.093546 | 0.050049 | 0.106407 | -4.46834 |
| LRP6      | -0.65425 | 0.26542  | -2.09554 | 0.049143 | 0.104823 | -4.46875 |
| GIPC2     | 0.514879 | -0.15025 | 2.095522 | 0.049145 | 0.104823 | -4.46878 |
| ASPH      | -0.906   | 0.496008 | -2.09545 | 0.049152 | 0.104823 | -4.4689  |
| AKIP1     | -0.43271 | 0.515618 | -2.0954  | 0.049157 | 0.104823 | -4.46899 |
| FAM129A   | -1.0052  | 0.707571 | -2.09519 | 0.049177 | 0.104839 | -4.46935 |
| BPESC1    | -0.57532 | -0.05029 | -2.0949  | 0.049206 | 0.104888 | -4.46986 |
| NETO2     | -0.48062 | 0.116442 | -2.0918  | 0.050221 | 0.106682 | -4.47137 |
| PTP4A3    | 0.603102 | -0.02349 | 2.093992 | 0.049295 | 0.105061 | -4.47146 |
| CXorf21   | -0.69511 | 0.542927 | -2.09391 | 0.049303 | 0.105062 | -4.47161 |
| ZBTB8A    | -0.37426 | 0.281732 | -2.09351 | 0.049343 | 0.105135 | -4.47231 |
| TMEM174   | -0.45704 | -0.00991 | -2.09274 | 0.049419 | 0.105286 | -4.47366 |
| ARHGEF40  | -1.02474 | 0.773094 | -2.09265 | 0.049427 | 0.105292 | -4.47381 |
| GOLGA5    | -0.51125 | 0.395826 | -2.09252 | 0.04944  | 0.105309 | -4.47405 |
| FAM3A     | -0.71266 | 0.83127  | -2.09228 | 0.049464 | 0.105347 | -4.47446 |
| LOC28426  | 0.315956 | -0.43017 | 2.091502 | 0.049541 | 0.105499 | -4.47583 |
| C11orf92  | -0.45706 | 0.101434 | -2.09104 | 0.049586 | 0.105584 | -4.47663 |
| ZNF738    | -0.53764 | 0.079038 | -2.09068 | 0.049622 | 0.105638 | -4.47726 |
| LOC10013  | -0.43838 | 0.087675 | -2.09061 | 0.049629 | 0.105642 | -4.47739 |
| SLC2A14   | -0.92148 | 0.420022 | -2.09041 | 0.049649 | 0.105672 | -4.47774 |
| MCM8      | -1.31285 | 1.270055 | -2.09024 | 0.049665 | 0.105696 | -4.47803 |
| ANO7      | 0.553368 | -0.293   | 2.089975 | 0.049692 | 0.105741 | -4.4785  |
| GPRC5C    | 0.393398 | -0.28068 | 2.089366 | 0.049752 | 0.105857 | -4.47957 |
| SPO11     | 0.759863 | -0.36088 | 2.031848 | 0.060441 | 0.122826 | -4.48133 |
| MRGPRX3   | -0.60367 | -0.08447 | -2.086   | 0.0508   | 0.107666 | -4.48146 |
| VTI1B     | 0.590639 | -0.17585 | 2.088201 | 0.049868 | 0.106081 | -4.48161 |
| UROD      | 0.394136 | -0.36148 | 2.088197 | 0.049868 | 0.106081 | -4.48161 |
| OXSM      | -0.51687 | 0.076775 | -2.088   | 0.049887 | 0.106111 | -4.48195 |
| SV2C      | 0.390569 | -0.3151  | 2.087124 | 0.049975 | 0.106286 | -4.48349 |
| NCAM1     | -0.60046 | 0.22204  | -2.0848  | 0.05092  | 0.107839 | -4.48354 |
| MGP       | -0.62056 | 0.256237 | -2.08667 | 0.05002  | 0.106361 | -4.48428 |
| ZC3H6     | 0.469772 | -0.25786 | 2.086658 | 0.050021 | 0.106361 | -4.48431 |
| TNFRSF10  | 0.54802  | -0.08847 | 2.084246 | 0.050976 | 0.107918 | -4.4845  |
| MRRF      | -0.42573 | 0.370663 | -2.08626 | 0.050061 | 0.10641  | -4.485   |
| C3orf18   | 0.645    | -0.33792 | 2.085922 | 0.050095 | 0.106471 | -4.48559 |
| AWAT1     | -0.57109 | 0.180723 | -2.08578 | 0.050109 | 0.106489 | -4.48584 |
| ME1       | 0.633589 | -0.30571 | 2.085635 | 0.050123 | 0.106509 | -4.4861  |
| QDPR      | 0.713852 | -0.25927 | 2.061637 | 0.053295 | 0.111399 | -4.4869  |
| LINC00479 | -0.56872 | -0.00978 | -2.08259 | 0.051142 | 0.10818  | -4.48736 |
| AIFM1     | -0.40258 | 0.366324 | -2.08487 | 0.0502   | 0.106648 | -4.48744 |
| RFC4      | -0.57554 | 0.284831 | -2.08432 | 0.050254 | 0.106741 | -4.48839 |
| C2        | -0.99594 | 0.879972 | -2.08414 | 0.050273 | 0.10677  | -4.48872 |

|           |          |          |          |          |          |          |
|-----------|----------|----------|----------|----------|----------|----------|
| PRPF39    | -0.65429 | 0.147819 | -2.08361 | 0.050325 | 0.106857 | -4.48963 |
| GAGE3     | 0.672162 | -0.24723 | 2.059909 | 0.053476 | 0.111682 | -4.48987 |
| MICALL2   | 0.543842 | -0.00243 | 2.083474 | 0.05034  | 0.106875 | -4.48988 |
| MAP7D3    | -0.6617  | 0.667743 | -2.08341 | 0.050346 | 0.106878 | -4.48999 |
| SSFA2     | -0.87403 | 0.345935 | -2.08321 | 0.050366 | 0.106899 | -4.49033 |
| HIST1H4J  | -0.60339 | 0.187487 | -2.0832  | 0.050367 | 0.106899 | -4.49035 |
| CHM       | -0.97726 | 0.652675 | -2.08307 | 0.05038  | 0.106915 | -4.49058 |
| PDGFD     | 0.307167 | -0.13946 | 2.080669 | 0.051336 | 0.108475 | -4.4907  |
| ANKRD34A  | -0.67675 | 1.274354 | -2.08289 | 0.050399 | 0.106943 | -4.4909  |
| YAF2      | -0.83436 | 0.454146 | -2.08046 | 0.051357 | 0.108495 | -4.49105 |
| SPOCK2    | 0.679955 | -0.19291 | 2.082034 | 0.050484 | 0.107113 | -4.49239 |
| RFXANK    | -0.30063 | 0.228697 | -2.08175 | 0.050512 | 0.107161 | -4.49288 |
| MGC34034  | 0.557823 | -0.57912 | 2.041498 | 0.060709 | 0.123229 | -4.49316 |
| CWC22     | -0.88633 | 0.673567 | -2.08132 | 0.050555 | 0.107241 | -4.49363 |
| NRGN      | 0.892746 | 0.142096 | 2.080833 | 0.050605 | 0.107334 | -4.49449 |
| SSH2      | -0.60109 | 0.081358 | -2.08035 | 0.050653 | 0.107425 | -4.49532 |
| CDK5RAP1  | -0.45284 | 0.319228 | -2.08018 | 0.050671 | 0.10745  | -4.49563 |
| MAPK10    | 0.405615 | -0.2207  | 2.074626 | 0.05275  | 0.11058  | -4.49601 |
| WBSCR16   | -0.47011 | 0.528817 | -2.0799  | 0.050699 | 0.107499 | -4.49612 |
| YSK4      | -0.69359 | 0.142022 | -2.07937 | 0.050752 | 0.107589 | -4.49703 |
| SNAI3     | 0.471771 | 0.008991 | 2.079368 | 0.050753 | 0.107589 | -4.49705 |
| ZNF721    | -0.86946 | 0.326844 | -2.07912 | 0.050777 | 0.10763  | -4.49748 |
| KRT35     | 0.382206 | -0.36817 | 2.078191 | 0.050872 | 0.107801 | -4.4991  |
| LOC100506 | 0.466162 | -0.42591 | 2.078137 | 0.050877 | 0.107801 | -4.4992  |
| FRMD3     | 0.256188 | -0.03594 | 2.07556  | 0.051856 | 0.10926  | -4.49955 |
| B4GALT5   | -1.30831 | 0.798065 | -2.07791 | 0.0509   | 0.107825 | -4.49959 |
| ABCF3     | 0.281135 | -0.2379  | 2.077863 | 0.050905 | 0.107825 | -4.49967 |
| MICALCL   | 1.377863 | -0.12138 | 2.025325 | 0.05804  | 0.118995 | -4.5001  |
| CSDA      | 0.824445 | 0.085955 | 2.077281 | 0.050964 | 0.107918 | -4.50069 |
| GRPEL2    | -0.42696 | 0.155081 | -2.07719 | 0.050973 | 0.107918 | -4.50085 |
| UNC119B   | 0.326097 | -0.08548 | 2.076678 | 0.051025 | 0.108003 | -4.50174 |
| ITGB2     | -0.47875 | 0.448193 | -2.07643 | 0.051051 | 0.108042 | -4.50218 |
| TAP1      | -0.57169 | 0.466216 | -2.07639 | 0.051054 | 0.108042 | -4.50225 |
| MPZL1     | -0.94095 | 0.715245 | -2.07612 | 0.051082 | 0.108085 | -4.50272 |
| LCP1      | -0.3791  | 0.219453 | -2.07608 | 0.051086 | 0.108085 | -4.50278 |
| C15orf5   | 0.551437 | -0.2969  | 2.075607 | 0.051134 | 0.108175 | -4.50361 |
| RAD9A     | -0.39061 | 0.43278  | -2.07535 | 0.05116  | 0.108206 | -4.50405 |
| HSP90B1   | 0.522346 | -0.00613 | 2.075194 | 0.051176 | 0.108229 | -4.50433 |
| LOC100507 | -0.49971 | 0.072269 | -2.07273 | 0.052146 | 0.109691 | -4.50445 |
| PLCG1     | 0.584309 | -0.0003  | 2.074986 | 0.051197 | 0.108252 | -4.50469 |
| SREK1IP1  | -0.45261 | 0.176242 | -2.07497 | 0.051198 | 0.108252 | -4.50471 |
| CNTD1     | -0.57003 | -0.06011 | -2.04932 | 0.055408 | 0.114727 | -4.50491 |
| LOC100288 | -0.81496 | 0.133132 | -2.07217 | 0.052202 | 0.109772 | -4.5054  |
| ARRB2     | -0.44879 | 0.376481 | -2.07448 | 0.051249 | 0.108345 | -4.50558 |
| PRKD1     | -0.45222 | 0.007904 | -2.07207 | 0.052213 | 0.109772 | -4.50558 |
| WDTC1     | -0.39771 | 0.395273 | -2.07444 | 0.051253 | 0.108345 | -4.50565 |
| HDAC7     | -0.4313  | 0.380064 | -2.07432 | 0.051265 | 0.108359 | -4.50585 |

|           |          |          |          |          |          |          |
|-----------|----------|----------|----------|----------|----------|----------|
| ITPR2     | -0.65478 | 0.542953 | -2.07422 | 0.051275 | 0.108369 | -4.50603 |
| LOC100506 | -0.3104  | 0.006701 | -2.0717  | 0.052251 | 0.109817 | -4.50621 |
| NOP10     | -0.54167 | 0.46688  | -2.07407 | 0.05129  | 0.108388 | -4.50628 |
| ITGA6     | 0.650233 | -0.71671 | 2.073543 | 0.051344 | 0.108479 | -4.50721 |
| TRIM27    | -0.49983 | 0.170585 | -2.07315 | 0.051384 | 0.10854  | -4.50789 |
| SLC30A1   | -0.55934 | 0.117777 | -2.07282 | 0.051418 | 0.1086   | -4.50847 |
| NOX4      | -0.53813 | 0.083385 | -2.07266 | 0.051434 | 0.108622 | -4.50874 |
| FAM161A   | -0.59773 | 0.353689 | -2.07023 | 0.052403 | 0.110063 | -4.50877 |
| LOC389833 | -0.86601 | 0.429668 | -2.0701  | 0.052416 | 0.110075 | -4.50899 |
| EN2       | 0.301233 | -0.45854 | 2.072512 | 0.051449 | 0.108643 | -4.509   |
| GPT2      | -0.47033 | 0.558648 | -2.0722  | 0.051482 | 0.108699 | -4.50955 |
| PCDP1     | 0.415996 | 0.044865 | 2.069617 | 0.052465 | 0.110148 | -4.50982 |
| C22orf39  | -0.79813 | 0.884587 | -2.07172 | 0.05153  | 0.108789 | -4.51038 |
| ZBED1     | -0.5386  | 0.601943 | -2.07167 | 0.051535 | 0.108789 | -4.51047 |
| DHRS7     | -0.64397 | 0.200218 | -2.07142 | 0.051561 | 0.108832 | -4.51091 |
| NKX2-1    | -0.4616  | 0.094515 | -2.04748 | 0.054794 | 0.113757 | -4.51118 |
| SCGB1D2   | -0.43881 | 0.117547 | -2.06866 | 0.052565 | 0.110326 | -4.51148 |
| RP11-165F | 0.300142 | -0.11881 | 2.071089 | 0.051595 | 0.108884 | -4.51148 |
| RHPN1     | 0.447059 | -0.06595 | 2.071022 | 0.051602 | 0.108884 | -4.5116  |
| CATSPER1  | -0.67954 | 0.396965 | -2.07101 | 0.051603 | 0.108884 | -4.51163 |
| GALNT9    | 0.711773 | -0.96435 | 2.070963 | 0.051608 | 0.108884 | -4.5117  |
| BRF1      | 0.379912 | 0.049959 | 2.070494 | 0.051656 | 0.108965 | -4.51252 |
| BOD1P     | -0.56101 | 0.422523 | -2.07022 | 0.051684 | 0.108998 | -4.513   |
| SORL1     | 0.724459 | -0.70634 | 2.070118 | 0.051695 | 0.109008 | -4.51317 |
| PNPLA2    | -0.67095 | 0.765739 | -2.07    | 0.051706 | 0.109022 | -4.51337 |
| FAAH      | 0.578492 | -0.01575 | 2.069864 | 0.051721 | 0.109039 | -4.51361 |
| AHCY      | -0.5782  | 0.481406 | -2.06948 | 0.05176  | 0.109104 | -4.51427 |
| TRAPPC10  | -0.80037 | 0.354414 | -2.06946 | 0.051762 | 0.109104 | -4.51432 |
| RPRD2     | -0.34374 | 0.582889 | -2.06904 | 0.051805 | 0.109183 | -4.51505 |
| ZBTB33    | -0.63145 | 0.180749 | -2.06869 | 0.051841 | 0.109247 | -4.51566 |
| LOC100128 | -0.65485 | 0.237234 | -2.06852 | 0.051858 | 0.10926  | -4.51595 |
| ZG16      | 0.318006 | -0.25518 | 2.044531 | 0.055112 | 0.114259 | -4.51623 |
| LAPTM4A   | -0.49637 | -0.2899  | -2.06796 | 0.051916 | 0.10937  | -4.51692 |
| CER1      | -0.39157 | 0.028429 | -2.06759 | 0.051954 | 0.109438 | -4.51756 |
| ACSF2     | 0.548077 | -0.00479 | 2.067531 | 0.051961 | 0.109438 | -4.51767 |
| THAP8     | -0.50693 | 0.674287 | -2.06747 | 0.051967 | 0.109438 | -4.51779 |
| RPF1      | -0.57159 | 0.289232 | -2.06743 | 0.051971 | 0.109438 | -4.51785 |
| CAGE1     | 0.573667 | -0.25675 | 2.067344 | 0.05198  | 0.109445 | -4.518   |
| HEG1      | 0.796932 | -0.50463 | 2.067225 | 0.051992 | 0.109459 | -4.51821 |
| PTGR2     | 0.733448 | -0.1691  | 2.067024 | 0.052013 | 0.109491 | -4.51856 |
| HIST1H1C  | -0.75468 | 0.434487 | -2.06686 | 0.05203  | 0.109515 | -4.51884 |
| SFN       | 0.366413 | -0.08217 | 2.066706 | 0.052046 | 0.109537 | -4.51911 |
| LYN       | -0.67327 | 0.487078 | -2.06624 | 0.052094 | 0.109626 | -4.51991 |
| KIRREL    | 0.426318 | -0.32355 | 2.065911 | 0.052128 | 0.109686 | -4.52049 |
| NSUN6     | -0.5722  | 0.462151 | -2.06585 | 0.052135 | 0.109689 | -4.5206  |
| DND1      | 0.30775  | -0.40185 | 2.065727 | 0.052147 | 0.109691 | -4.52081 |
| HIGD2A    | 0.463982 | -0.14432 | 2.065616 | 0.052159 | 0.109703 | -4.521   |

|           |          |          |          |          |          |          |
|-----------|----------|----------|----------|----------|----------|----------|
| RAP1B     | -0.80964 | 0.321683 | -2.06533 | 0.052188 | 0.109754 | -4.5215  |
| C14orf91  | 0.743126 | -0.09689 | 2.065086 | 0.052213 | 0.109772 | -4.52192 |
| BNC1      | 0.480101 | -0.29212 | 2.059483 | 0.054327 | 0.113068 | -4.52193 |
| NTS       | 0.463618 | -0.23746 | 2.064847 | 0.052238 | 0.109812 | -4.52234 |
| ISG20     | 0.559223 | -0.16054 | 2.064715 | 0.052252 | 0.109817 | -4.52257 |
| MIR7-3HG  | 0.49371  | -0.38212 | 2.063994 | 0.052327 | 0.109962 | -4.52382 |
| PDE6H     | -0.59623 | 0.362142 | -2.06388 | 0.052338 | 0.109975 | -4.52402 |
| TMEM86A   | 0.860369 | -0.07803 | 2.063664 | 0.052361 | 0.110001 | -4.52439 |
| LIPH      | 0.760307 | -0.13749 | 2.063655 | 0.052362 | 0.110001 | -4.52441 |
| EHBP1     | -0.52143 | 0.455991 | -2.06338 | 0.05239  | 0.110049 | -4.52488 |
| PSAT1     | -0.77522 | 0.785049 | -2.06084 | 0.053378 | 0.111526 | -4.52496 |
| UBXN8     | -0.60592 | 0.205406 | -2.0631  | 0.05242  | 0.110075 | -4.52537 |
| SRY       | -0.23769 | 0.043785 | -2.03904 | 0.055707 | 0.115224 | -4.52561 |
| RBAK      | -0.73177 | 0.201325 | -2.06286 | 0.052445 | 0.110116 | -4.5258  |
| PSG9      | 0.212732 | -0.04727 | 2.0564   | 0.054653 | 0.11356  | -4.52719 |
| ASTL      | 0.473829 | -0.58375 | 2.061758 | 0.052559 | 0.110326 | -4.5277  |
| TDRKH     | 0.454713 | 0.147958 | 2.061679 | 0.052568 | 0.110326 | -4.52784 |
| FAM124B   | 0.478365 | -0.1009  | 2.059038 | 0.053567 | 0.111826 | -4.52806 |
| LOC65307! | -0.72675 | 0.350629 | -2.06142 | 0.052594 | 0.11037  | -4.52828 |
| RPRM      | -0.45067 | 0.003384 | -2.06124 | 0.052614 | 0.1104   | -4.52861 |
| USP3      | -0.68227 | 0.806519 | -2.06105 | 0.052633 | 0.110428 | -4.52893 |
| GFPT1     | 0.314043 | -0.14734 | 2.060807 | 0.052658 | 0.110444 | -4.52936 |
| PGAM5     | -0.54865 | 0.732326 | -2.06078 | 0.052661 | 0.110444 | -4.5294  |
| ZNF187    | -0.55406 | 0.408659 | -2.06076 | 0.052663 | 0.110444 | -4.52944 |
| MSI1      | 0.465215 | -0.15607 | 2.060709 | 0.052669 | 0.110444 | -4.52953 |
| ATP1A1    | 0.47374  | -0.35134 | 2.060541 | 0.052686 | 0.110469 | -4.52982 |
| STIM1     | -0.35865 | 0.413359 | -2.06043 | 0.052697 | 0.110481 | -4.53    |
| PRMT8     | 0.455749 | -0.39399 | 2.054423 | 0.054863 | 0.113863 | -4.53056 |
| STAT1     | -0.96957 | 0.291789 | -2.05967 | 0.052777 | 0.110624 | -4.53133 |
| GDAP1L1   | -0.19414 | 0.01207  | -2.05714 | 0.053767 | 0.11216  | -4.53134 |
| NAPRT1    | -0.60706 | 0.277995 | -2.05919 | 0.052827 | 0.110716 | -4.53215 |
| SYNGAP1   | 0.50748  | -0.0782  | 2.059143 | 0.052832 | 0.110716 | -4.53224 |
| AKAP3     | -0.40789 | 0.305136 | -2.03314 | 0.057171 | 0.117508 | -4.53233 |
| IL4I1     | 0.949927 | -0.68548 | 2.059071 | 0.05284  | 0.11072  | -4.53237 |
| GABRG3    | 0.528729 | -0.18897 | 2.056274 | 0.053859 | 0.112302 | -4.53282 |
| LRRC6     | -1.14454 | 0.806976 | -2.05873 | 0.052875 | 0.110782 | -4.53295 |
| TCEAL3    | 0.324808 | -0.1005  | 2.058588 | 0.052891 | 0.110803 | -4.53321 |
| SDC1      | 0.570143 | 0.054719 | 2.058381 | 0.052912 | 0.110826 | -4.53356 |
| SOLH      | -0.78936 | 0.610407 | -2.05837 | 0.052913 | 0.110826 | -4.53358 |
| OTC       | -0.42478 | -0.18553 | -2.03428 | 0.056227 | 0.116056 | -4.53373 |
| HIST1H4K  | -0.46657 | 0.148979 | -2.05825 | 0.052926 | 0.110841 | -4.53379 |
| CLVS1     | -0.52567 | 0.034502 | -2.05815 | 0.052936 | 0.110851 | -4.53397 |
| FAM205A   | -0.63647 | 0.201194 | -2.05227 | 0.055092 | 0.114242 | -4.53422 |
| MKL1      | -0.56391 | 0.619973 | -2.0578  | 0.052973 | 0.110905 | -4.53456 |
| C22orf28  | -0.41969 | 0.286502 | -2.05776 | 0.052978 | 0.110905 | -4.53465 |
| SPTSSB    | -0.45599 | 0.045506 | -2.05775 | 0.052979 | 0.110905 | -4.53467 |
| ALG11     | -0.71749 | 0.103699 | -2.05761 | 0.052993 | 0.110922 | -4.5349  |

|           |          |          |          |          |          |          |
|-----------|----------|----------|----------|----------|----------|----------|
| CBR1      | -0.50303 | 0.620373 | -2.05756 | 0.052998 | 0.110922 | -4.53499 |
| DDX11     | -0.3641  | 0.394691 | -2.05731 | 0.053024 | 0.110964 | -4.53542 |
| DHRS12    | -0.48658 | 0.725566 | -2.05705 | 0.053052 | 0.111009 | -4.53587 |
| MAGEB18   | 0.88789  | 0.136404 | 2.051041 | 0.055224 | 0.114455 | -4.53632 |
| LOC100501 | -0.6926  | 0.431494 | -2.05664 | 0.053095 | 0.111088 | -4.53658 |
| ITGA8     | -0.7433  | 0.279111 | -2.05653 | 0.053107 | 0.111098 | -4.53677 |
| HIST1H2AE | 0.401188 | -0.25964 | 2.05649  | 0.053111 | 0.111098 | -4.53684 |
| SELL      | -0.5628  | 0.748774 | -2.0537  | 0.054131 | 0.112744 | -4.53724 |
| TREX1     | 0.547172 | -0.06269 | 2.056024 | 0.05316  | 0.111188 | -4.53765 |
| SEPT7P2   | -0.42083 | 0.152918 | -2.05597 | 0.053165 | 0.111188 | -4.53774 |
| SLCO2B1   | -0.51647 | 0.119647 | -2.05592 | 0.053171 | 0.111189 | -4.53784 |
| CNOT1     | -0.55699 | 0.37839  | -2.05575 | 0.053188 | 0.111213 | -4.53812 |
| MIA2      | 0.513744 | -0.48056 | 2.029579 | 0.057565 | 0.118209 | -4.53835 |
| DSC1      | 1.069833 | -0.14131 | 2.052977 | 0.054208 | 0.112851 | -4.53849 |
| PRAMEL    | -0.68158 | 0.278771 | -2.05517 | 0.05325  | 0.111133 | -4.53914 |
| ENDOD1    | 0.585117 | -0.18084 | 2.054832 | 0.053286 | 0.111392 | -4.53972 |
| LAGE3     | 0.610863 | -0.19019 | 2.054689 | 0.053301 | 0.1114   | -4.53996 |
| KDM5C     | -0.43834 | 0.545512 | -2.05463 | 0.053307 | 0.1114   | -4.54006 |
| C2orf82   | -0.70975 | 0.285143 | -2.02835 | 0.057702 | 0.118415 | -4.54043 |
| MKLN1     | -0.63365 | 0.324747 | -2.05415 | 0.053358 | 0.111495 | -4.5409  |
| SHBG      | 0.42929  | -0.46839 | 2.017595 | 0.062061 | 0.125377 | -4.54128 |
| SPECC1L   | -0.46601 | 0.248703 | -2.0536  | 0.053416 | 0.111592 | -4.54185 |
| ZNF610    | -0.658   | 0.432352 | -2.0532  | 0.053458 | 0.111658 | -4.54255 |
| SLC22A9   | -0.67744 | 0.077543 | -2.05297 | 0.053482 | 0.111683 | -4.54294 |
| TSPAN11   | -0.56923 | 0.128868 | -2.04715 | 0.055642 | 0.115114 | -4.54294 |
| CCDC158   | 0.365452 | -0.17596 | 2.052914 | 0.053488 | 0.111685 | -4.54304 |
| UGT1A6    | -0.43281 | 0.22757  | -2.05205 | 0.053579 | 0.111839 | -4.54453 |
| QRICH1    | 0.557507 | -0.07552 | 2.051936 | 0.053592 | 0.111853 | -4.54473 |
| DENND2A   | 0.554899 | -0.3358  | 2.051672 | 0.05362  | 0.111888 | -4.54519 |
| GPR123    | 0.429395 | -0.21214 | 2.051495 | 0.053639 | 0.111915 | -4.5455  |
| TAB2      | 0.502259 | -0.59524 | 2.051242 | 0.053665 | 0.111959 | -4.54593 |
| NXPH3     | 0.265785 | -0.14536 | 2.045338 | 0.055838 | 0.115446 | -4.54603 |
| NACA      | -0.63305 | 1.080462 | -2.05013 | 0.053784 | 0.112183 | -4.54786 |
| TFCP2     | -0.65599 | 0.512563 | -2.04969 | 0.053831 | 0.112268 | -4.54862 |
| IRF4      | -0.36206 | 0.376058 | -2.04952 | 0.053849 | 0.112294 | -4.54891 |
| ART4      | -0.40693 | 0.124297 | -2.04936 | 0.053866 | 0.112306 | -4.5492  |
| C1orf106  | -0.53973 | 0.536886 | -2.04919 | 0.053884 | 0.112332 | -4.54949 |
| KEL       | 0.892666 | 0.452036 | 2.048442 | 0.053964 | 0.112485 | -4.55078 |
| ATP1B1    | 0.464415 | -0.83311 | 2.048271 | 0.053982 | 0.112511 | -4.55107 |
| LAMC1     | -0.54676 | 0.291637 | -2.0481  | 0.054    | 0.112537 | -4.55136 |
| SP8       | 1.139193 | -0.91008 | 1.911182 | 0.075459 | 0.146137 | -4.55191 |
| CAST      | -0.62584 | 0.294176 | -2.04738 | 0.054077 | 0.112687 | -4.55262 |
| SNRNP200  | 0.347587 | -0.1775  | 2.047091 | 0.054108 | 0.112733 | -4.55311 |
| SNHG10    | 0.959633 | 0.35505  | 2.047017 | 0.054116 | 0.112733 | -4.55324 |
| RNF114    | -0.45598 | 0.359673 | -2.04701 | 0.054117 | 0.112733 | -4.55326 |
| CYP2C9    | -0.27022 | -0.04616 | -2.04685 | 0.054134 | 0.112744 | -4.55353 |
| SPRR1B    | 0.355947 | -0.2719  | 2.046611 | 0.054159 | 0.112785 | -4.55394 |

|           |          |          |          |          |          |          |
|-----------|----------|----------|----------|----------|----------|----------|
| SUPV3L1   | 0.736396 | -0.01715 | 2.022357 | 0.057551 | 0.118202 | -4.55402 |
| LOC59510: | -0.29887 | -0.13133 | -2.0465  | 0.054171 | 0.112796 | -4.55413 |
| C5orf54   | -0.4828  | 0.127735 | -2.04646 | 0.054176 | 0.112796 | -4.55421 |
| USH1G     | 0.375106 | -0.44365 | 2.020852 | 0.05772  | 0.118429 | -4.55658 |
| FLYWCH2   | 0.335885 | -0.11129 | 2.045024 | 0.054329 | 0.113068 | -4.55668 |
| TRPM6     | -0.9636  | 0.729301 | -2.04498 | 0.054334 | 0.113068 | -4.55676 |
| ADAT3     | 0.43482  | 0.142498 | 2.044597 | 0.054375 | 0.113137 | -4.55742 |
| SPANXD    | -0.57852 | 0.113494 | -2.04455 | 0.05438  | 0.113137 | -4.5575  |
| CYP2D6    | -0.39664 | 0.548875 | -2.04449 | 0.054387 | 0.11314  | -4.55761 |
| OAS1      | -1.04037 | 0.996511 | -2.01963 | 0.057857 | 0.118682 | -4.55864 |
| LBP       | 0.709851 | -0.1924  | 1.988608 | 0.063222 | 0.127158 | -4.55896 |
| CD81      | 0.603019 | -0.10783 | 2.043472 | 0.054496 | 0.113354 | -4.55936 |
| UCHL5     | -0.44622 | -0.09884 | -2.04327 | 0.054518 | 0.113387 | -4.55971 |
| UBA2      | -0.46024 | 0.169826 | -2.04312 | 0.054534 | 0.113398 | -4.55997 |
| EIF2B4    | -0.35508 | 0.316698 | -2.04312 | 0.054535 | 0.113398 | -4.55998 |
| STEAP4    | -0.97966 | 0.83869  | -2.04289 | 0.054559 | 0.113436 | -4.56036 |
| KRTAP9-2  | -0.67518 | 0.253422 | -2.04004 | 0.055598 | 0.115047 | -4.56067 |
| RNF128    | -0.22794 | 0.050486 | -2.04258 | 0.054592 | 0.113492 | -4.56091 |
| COL4A3BP  | -0.66686 | 0.267696 | -2.04253 | 0.054597 | 0.113492 | -4.56098 |
| GTF3C1    | -0.33085 | 0.390165 | -2.04243 | 0.054609 | 0.113503 | -4.56117 |
| C22orf23  | 0.184105 | -0.04266 | 2.042378 | 0.054614 | 0.113503 | -4.56125 |
| FGA       | 0.716167 | -0.29184 | 2.039655 | 0.05564  | 0.115114 | -4.56134 |
| EPHA10    | 0.237903 | -0.20659 | 2.042144 | 0.054639 | 0.113544 | -4.56166 |
| PVRL1     | 0.491433 | -0.39418 | 2.041941 | 0.054661 | 0.113565 | -4.56201 |
| FAM76B    | -0.71499 | 0.367963 | -2.04158 | 0.0547   | 0.113634 | -4.56263 |
| ADCK3     | 0.432232 | -0.09154 | 2.041489 | 0.05471  | 0.113642 | -4.56278 |
| EPHB6     | 0.523259 | -0.13222 | 2.041419 | 0.054718 | 0.113646 | -4.56291 |
| CAPRIN1   | -0.97659 | 1.012827 | -2.04083 | 0.054781 | 0.113757 | -4.56392 |
| ZBTB12    | 0.347357 | -0.12028 | 2.016464 | 0.058215 | 0.119329 | -4.56402 |
| PDHX      | -0.45213 | -0.01295 | -2.04075 | 0.05479  | 0.113757 | -4.56406 |
| PRKCI     | -0.62203 | 0.365429 | -2.04074 | 0.054792 | 0.113757 | -4.56409 |
| RARS      | -0.38512 | 0.034014 | -2.04029 | 0.05484  | 0.11384  | -4.56486 |
| GARS      | 0.219357 | -0.0613  | 2.039976 | 0.054874 | 0.113874 | -4.5654  |
| MAP3K5    | -0.60142 | 0.271039 | -2.03945 | 0.054931 | 0.11398  | -4.5663  |
| IL9R      | 0.479354 | -0.48215 | 2.039155 | 0.054963 | 0.114034 | -4.56681 |
| SUSD3     | -0.72595 | 0.325056 | -2.03898 | 0.054982 | 0.114062 | -4.56711 |
| CTSG      | 1.906794 | -0.78748 | 2.038692 | 0.055013 | 0.114114 | -4.56761 |
| MRPS9     | -0.50847 | 0.808786 | -2.03846 | 0.055038 | 0.114154 | -4.56801 |
| C2CD2L    | 0.30602  | -0.07571 | 2.038331 | 0.055052 | 0.114172 | -4.56823 |
| NUDT13    | 0.327469 | -0.19155 | 2.037875 | 0.055102 | 0.11425  | -4.56902 |
| CDO1      | 0.527622 | -0.47688 | 2.036987 | 0.055198 | 0.114426 | -4.57055 |
| RFTN1     | 0.7493   | 0.076729 | 2.036884 | 0.05521  | 0.114437 | -4.57072 |
| POLN      | -0.65906 | 0.200892 | -2.03654 | 0.055247 | 0.114491 | -4.57132 |
| COX4NB    | -0.57004 | 0.135864 | -2.03644 | 0.055258 | 0.114502 | -4.5715  |
| C1orf135  | -0.38892 | 0.168941 | -2.03614 | 0.05529  | 0.114557 | -4.572   |
| LINC00265 | -1.42162 | 1.1273   | -2.03583 | 0.055325 | 0.114616 | -4.57254 |
| CMTM1     | -0.63151 | 0.228461 | -2.03541 | 0.055371 | 0.114687 | -4.57327 |

|           |          |          |          |          |          |          |
|-----------|----------|----------|----------|----------|----------|----------|
| CLN5      | -0.51427 | -0.10899 | -2.03525 | 0.055388 | 0.114706 | -4.57354 |
| PCDH11Y   | 0.505746 | -0.13178 | 2.035215 | 0.055392 | 0.114706 | -4.5736  |
| PTAFR     | -0.70008 | 0.253452 | -2.03448 | 0.055472 | 0.114848 | -4.57486 |
| PRKCSH    | -0.50758 | 0.628059 | -2.03407 | 0.055517 | 0.114926 | -4.57557 |
| RNF170    | -0.38496 | 0.239588 | -2.03403 | 0.055522 | 0.114926 | -4.57565 |
| CCDC127   | -0.41682 | 0.499295 | -2.03396 | 0.055529 | 0.11493  | -4.57577 |
| GPR172A   | 0.291415 | -0.05788 | 2.033412 | 0.055589 | 0.115041 | -4.5767  |
| GFPT2     | 0.869318 | -0.76054 | 2.008624 | 0.059109 | 0.120745 | -4.57729 |
| OVGP1     | 0.552696 | -0.21448 | 2.032773 | 0.055659 | 0.115138 | -4.5778  |
| FLJ13744  | -0.47009 | 0.176131 | -2.02954 | 0.05675  | 0.116802 | -4.57862 |
| NUDT16P1  | -0.66292 | 0.48121  | -2.03197 | 0.055747 | 0.115296 | -4.57919 |
| CXorf22   | -0.45792 | 0.070099 | -2.02905 | 0.056805 | 0.116879 | -4.57947 |
| NT5DC2    | -0.81325 | 1.328746 | -2.03176 | 0.05577  | 0.115331 | -4.57954 |
| TMEM43    | -0.42287 | 0.307525 | -2.03153 | 0.055795 | 0.11537  | -4.57993 |
| PTP4A2    | -0.47873 | 0.389166 | -2.03107 | 0.055846 | 0.115451 | -4.58073 |
| LOC100240 | -0.79401 | 0.376898 | -2.03094 | 0.05586  | 0.115469 | -4.58095 |
| DOC2B     | 0.326041 | -0.1989  | 2.03085  | 0.05587  | 0.115477 | -4.58111 |
| CXorf56   | -0.52758 | 0.589193 | -2.0308  | 0.055876 | 0.115477 | -4.5812  |
| LEMD3     | -0.63208 | -0.00036 | -2.02779 | 0.056944 | 0.117104 | -4.5816  |
| FUT1      | 0.519394 | -0.45114 | 1.986279 | 0.067137 | 0.133322 | -4.5821  |
| MRPL20    | -0.46994 | 0.233076 | -2.03023 | 0.055938 | 0.115593 | -4.58217 |
| OTOP3     | 0.460171 | -0.23298 | 2.027385 | 0.05699  | 0.117185 | -4.5823  |
| TIMM44    | -0.41645 | 0.554984 | -2.02988 | 0.055977 | 0.115661 | -4.58278 |
| CEBPA     | -0.55255 | 0.570087 | -2.02974 | 0.055993 | 0.115682 | -4.58302 |
| ZNF687    | -0.39373 | 0.433825 | -2.0294  | 0.056031 | 0.115748 | -4.58361 |
| DFNA5     | -0.76832 | 0.538663 | -2.02654 | 0.057084 | 0.117352 | -4.58374 |
| C1orf131  | -0.87001 | 0.672987 | -2.02929 | 0.056042 | 0.11576  | -4.58379 |
| C15orf32  | 0.767358 | -0.29296 | 2.004519 | 0.059583 | 0.1215   | -4.58423 |
| CABLES1   | 0.512725 | 0.037507 | 2.028926 | 0.056083 | 0.11583  | -4.58442 |
| IPO7      | -0.76269 | 0.445819 | -2.02866 | 0.056112 | 0.115879 | -4.58488 |
| KIAA1652  | -0.55491 | 0.313046 | -2.02811 | 0.056173 | 0.11598  | -4.58582 |
| PRDX5     | 0.4354   | -0.3865  | 2.028052 | 0.056179 | 0.115981 | -4.58592 |
| SLC38A7   | -0.71727 | 0.65652  | -2.02771 | 0.056217 | 0.116047 | -4.58651 |
| CLPB      | 0.348116 | -0.12479 | 2.027515 | 0.056239 | 0.116067 | -4.58684 |
| PITPNM3   | 0.559838 | -0.25963 | 2.027459 | 0.056245 | 0.116067 | -4.58694 |
| SMARCE1   | -0.83159 | 0.80768  | -2.02716 | 0.056278 | 0.116124 | -4.58745 |
| PDCD1LG2  | -1.41586 | 0.9111   | -2.02684 | 0.056313 | 0.116183 | -4.58799 |
| EVL       | 0.878497 | -0.23841 | 2.026741 | 0.056324 | 0.116195 | -4.58817 |
| TFEB      | 0.389752 | 0.041929 | 2.026401 | 0.056362 | 0.11626  | -4.58875 |
| PRSS33    | 1.658282 | -0.47874 | 2.025961 | 0.056411 | 0.116349 | -4.58951 |
| SMC1B     | -0.42291 | 0.01593  | -2.02587 | 0.056421 | 0.116356 | -4.58967 |
| ATRIP     | 0.333722 | -0.02389 | 2.025824 | 0.056426 | 0.116356 | -4.58975 |
| NFATC2IP  | -0.43939 | 0.257116 | -2.02572 | 0.056437 | 0.116367 | -4.58992 |
| MRPL37    | 0.441021 | -0.0806  | 2.02545  | 0.056468 | 0.116409 | -4.59039 |
| PDE8A     | -0.64934 | 0.391033 | -2.02537 | 0.056476 | 0.116409 | -4.59052 |
| FILIP1L   | -0.56548 | 0.316117 | -2.02533 | 0.056481 | 0.116409 | -4.59059 |
| TBX6      | -0.32768 | 0.367594 | -2.02532 | 0.056482 | 0.116409 | -4.5906  |

|           |          |          |          |          |          |          |
|-----------|----------|----------|----------|----------|----------|----------|
| NCAPG     | -1.32506 | 1.012208 | -2.02504 | 0.056514 | 0.116463 | -4.5911  |
| C8orf66   | 0.290542 | -0.27723 | 2.024786 | 0.056542 | 0.116508 | -4.59153 |
| SLC9B2    | -0.56179 | 0.452923 | -2.02459 | 0.056564 | 0.116542 | -4.59187 |
| OR5H1     | 0.3221   | -0.38076 | 2.024318 | 0.056594 | 0.116578 | -4.59233 |
| PRKCG     | 0.312755 | -0.04491 | 2.024272 | 0.056599 | 0.116578 | -4.59241 |
| DOCK10    | 0.716738 | -0.30314 | 2.024266 | 0.056599 | 0.116578 | -4.59242 |
| STK17B    | -0.54759 | 0.161663 | -2.02372 | 0.056661 | 0.11668  | -4.59336 |
| CAPG      | -0.41961 | 0.191732 | -2.02372 | 0.056661 | 0.11668  | -4.59336 |
| ARHGAP39  | 0.595903 | -0.41067 | 1.996797 | 0.061315 | 0.124228 | -4.59342 |
| GDI1      | -0.38765 | 0.363534 | -2.02363 | 0.05667  | 0.116688 | -4.59351 |
| ZNF696    | 0.370433 | -0.21524 | 2.023533 | 0.056681 | 0.116697 | -4.59368 |
| CCL20     | -0.7182  | 0.543901 | -2.0234  | 0.056696 | 0.116715 | -4.5939  |
| NPCDR1    | 0.713005 | -0.7378  | 2.023134 | 0.056726 | 0.116764 | -4.59436 |
| NPY1R     | 0.261656 | -0.05815 | 2.016729 | 0.05901  | 0.120605 | -4.59447 |
| OCLM      | -0.54261 | -0.04885 | -2.02273 | 0.056771 | 0.116833 | -4.59505 |
| MRPS28    | -0.77033 | -0.06708 | -2.02254 | 0.056792 | 0.116865 | -4.59539 |
| RAD17     | -0.79254 | 0.222844 | -2.02232 | 0.056817 | 0.116891 | -4.59576 |
| REXO1     | -0.50492 | 0.742629 | -2.02182 | 0.056872 | 0.11699  | -4.59661 |
| TMEM205   | 0.335588 | -0.29666 | 2.02178  | 0.056877 | 0.11699  | -4.59668 |
| ST3GAL3   | 0.46979  | 0.102738 | 2.021719 | 0.056884 | 0.116992 | -4.59679 |
| LOC100501 | -0.53576 | -0.22041 | -1.99652 | 0.060514 | 0.122935 | -4.59772 |
| BBX       | 0.463637 | -0.3397  | 2.019997 | 0.057077 | 0.117352 | -4.59974 |
| DYDC2     | -0.2648  | 0.05296  | -2.01989 | 0.057089 | 0.117352 | -4.59993 |
| FBXL7     | -0.3046  | -0.03716 | -2.01873 | 0.057219 | 0.117596 | -4.60192 |
| CHST14    | -0.53972 | 0.734081 | -2.01858 | 0.057236 | 0.117617 | -4.60217 |
| CHURC1    | -0.72075 | -0.12047 | -2.01827 | 0.057271 | 0.117677 | -4.6027  |
| SPON2     | 1.225146 | -0.24058 | 2.018084 | 0.057292 | 0.117707 | -4.60302 |
| UBE2E1    | -1.33564 | 0.737038 | -2.0148  | 0.058404 | 0.119636 | -4.60372 |
| RPS5      | 0.78561  | -0.59473 | 2.017653 | 0.05734  | 0.117795 | -4.60375 |
| FEM1C     | -0.67714 | 0.399883 | -2.01477 | 0.058408 | 0.119636 | -4.60377 |
| TK2       | -0.93768 | 0.871109 | -2.01725 | 0.057385 | 0.117875 | -4.60444 |
| SERPINA4  | -0.32157 | -0.02669 | -2.01352 | 0.058549 | 0.119863 | -4.60588 |
| MYRIP     | -0.39045 | -0.17904 | -2.01561 | 0.057571 | 0.118209 | -4.60725 |
| CCR4      | 0.401491 | -0.59677 | 2.0156   | 0.057572 | 0.118209 | -4.60727 |
| AMPD1     | 0.843117 | -0.45364 | 1.960774 | 0.065687 | 0.131039 | -4.60751 |
| WDR78     | -0.62051 | 0.07657  | -2.0154  | 0.057594 | 0.118242 | -4.60761 |
| TIMP2     | -0.48842 | 0.27398  | -2.01521 | 0.057616 | 0.118275 | -4.60794 |
| PRPS2     | -1.09421 | 0.421206 | -2.01478 | 0.057665 | 0.118363 | -4.60868 |
| SEC24A    | -0.84829 | 0.403851 | -2.01468 | 0.057677 | 0.118374 | -4.60885 |
| IL28RA    | -0.67622 | 0.61798  | -2.01428 | 0.057722 | 0.118429 | -4.60953 |
| EFS       | 0.412393 | -0.15552 | 2.00733  | 0.060087 | 0.122258 | -4.61029 |
| C20orf43  | -0.93058 | 0.886894 | -2.01331 | 0.057832 | 0.118643 | -4.61119 |
| POU3F4    | 0.410356 | -0.23691 | 2.012398 | 0.057935 | 0.11883  | -4.61274 |
| PLA2G10   | -0.36789 | 0.139763 | -2.00941 | 0.059019 | 0.120611 | -4.61286 |
| PSAP      | -0.5852  | 0.544226 | -2.01216 | 0.057962 | 0.118872 | -4.61314 |
| SYNRG     | -0.72636 | 0.609938 | -2.012   | 0.057981 | 0.118898 | -4.61343 |
| GEM       | 0.365147 | -0.30265 | 1.984588 | 0.062767 | 0.126436 | -4.61379 |



|          |          |          |          |          |          |          |
|----------|----------|----------|----------|----------|----------|----------|
| ADAM8    | -0.47815 | 0.562391 | -2.01166 | 0.05802  | 0.118966 | -4.61401 |
| FAM175B  | 0.434257 | -0.12769 | 2.011178 | 0.058074 | 0.119052 | -4.61483 |
| FAM74A1  | 0.848444 | -0.45578 | 1.983115 | 0.062944 | 0.126715 | -4.61625 |
| DSCAM    | 0.334277 | -0.38993 | 2.006957 | 0.059301 | 0.121036 | -4.61702 |
| TRPV4    | 0.647885 | -0.02272 | 2.009826 | 0.058228 | 0.119344 | -4.61714 |
| C12orf73 | -0.96322 | 0.564628 | -2.00943 | 0.058274 | 0.119425 | -4.61782 |
| POLA1    | 0.486458 | -0.2391  | 2.009142 | 0.058306 | 0.119479 | -4.61831 |
| CYP4Z1   | -0.65986 | 0.076289 | -2.00581 | 0.059434 | 0.121256 | -4.61896 |
| ITGAV    | -0.67273 | -0.09301 | -2.00861 | 0.058367 | 0.11959  | -4.61921 |
| CANT1    | -0.6141  | 0.625871 | -2.00829 | 0.058404 | 0.119636 | -4.61976 |
| DAXX     | -0.31095 | 0.379477 | -2.00783 | 0.058457 | 0.119715 | -4.62055 |
| CHTOP    | -0.27859 | 0.033774 | -2.00782 | 0.058458 | 0.119715 | -4.62057 |
| PARP3    | 0.804716 | -0.13909 | 2.007477 | 0.058497 | 0.119782 | -4.62115 |
| GPR65    | -0.68764 | 0.417449 | -2.00722 | 0.058526 | 0.119829 | -4.62158 |
| POLE3    | 0.390028 | -0.50082 | 2.006927 | 0.05856  | 0.119874 | -4.62209 |
| ZNF214   | -0.34394 | 0.010328 | -2.00333 | 0.05972  | 0.121701 | -4.62315 |
| MEIS3    | 0.427492 | -0.26431 | 1.981347 | 0.062318 | 0.125765 | -4.62322 |
| C6orf70  | -0.44449 | -0.20284 | -2.0057  | 0.058701 | 0.120146 | -4.62418 |
| GRAMD2   | 0.450351 | -0.03159 | 2.005662 | 0.058706 | 0.120146 | -4.62424 |
| IMPA2    | -0.82054 | 0.33151  | -2.00535 | 0.058742 | 0.120206 | -4.62478 |
| FBXL14   | -0.29094 | 0.066409 | -2.0053  | 0.058747 | 0.120206 | -4.62486 |
| ENGASE   | 0.325162 | 0.02354  | 2.005112 | 0.058769 | 0.120229 | -4.62518 |
| HMGN1    | -0.6395  | 0.374182 | -2.0051  | 0.058771 | 0.120229 | -4.62521 |
| TBX4     | -0.5257  | -0.22618 | -2.00498 | 0.058784 | 0.120244 | -4.62541 |
| MEGF10   | -0.79119 | 0.246428 | -2.00418 | 0.058876 | 0.120403 | -4.62677 |
| THADA    | 0.324465 | -0.04246 | 2.004115 | 0.058884 | 0.120403 | -4.62688 |
| GNA11    | -0.53498 | 0.91176  | -2.0041  | 0.058886 | 0.120403 | -4.62691 |
| LOC40094 | 0.684468 | -0.20147 | 2.004094 | 0.058886 | 0.120403 | -4.62692 |
| C8orf38  | 0.223816 | -0.05786 | 2.000615 | 0.060036 | 0.122192 | -4.62775 |
| APOBEC3A | -1.69331 | 0.945964 | -2.00044 | 0.060056 | 0.122221 | -4.62805 |
| ORC3     | -0.39026 | -0.08787 | -2.00327 | 0.058981 | 0.120584 | -4.62832 |
| SLC3A1   | -0.40823 | 0.112324 | -2.00322 | 0.058987 | 0.120584 | -4.62841 |
| GGCX     | -0.3559  | 0.108055 | -2.00306 | 0.059006 | 0.120605 | -4.62868 |
| TRAF1    | 0.427505 | -0.23967 | 2.002792 | 0.059037 | 0.120635 | -4.62914 |
| UBE2N    | -0.62252 | 0.103228 | -2.00234 | 0.059089 | 0.120729 | -4.6299  |
| TMEM92   | -0.84435 | 0.719057 | -2.0022  | 0.059105 | 0.120745 | -4.63014 |
| OPA3     | 0.423593 | 0.112061 | 2.002085 | 0.059119 | 0.120752 | -4.63034 |
| TRIM26   | -0.39766 | 0.472744 | -2.00173 | 0.05916  | 0.120824 | -4.63096 |
| CROCC    | 0.318686 | -0.06453 | 2.00163  | 0.059171 | 0.120828 | -4.63112 |
| PAICS    | -0.67139 | 0.318848 | -2.0016  | 0.059174 | 0.120828 | -4.63116 |
| ZNF728   | -0.49416 | -0.09066 | -1.95534 | 0.071005 | 0.13921  | -4.63134 |
| PANK4    | -0.34647 | 0.461736 | -2.00146 | 0.059191 | 0.120843 | -4.6314  |
| GOLGA2   | -0.43306 | 0.298805 | -2.00143 | 0.059194 | 0.120843 | -4.63145 |
| RNF40    | -0.40797 | 0.576009 | -2.00137 | 0.059202 | 0.120845 | -4.63156 |
| DUSP9    | 0.349065 | -0.28629 | 2.000431 | 0.05931  | 0.121043 | -4.63316 |
| WEE1     | 0.600689 | -0.38722 | 2.000182 | 0.059339 | 0.121089 | -4.63358 |
| PRUNE    | -0.99241 | 0.855276 | -2.00001 | 0.059359 | 0.121117 | -4.63387 |

|           |          |          |          |          |          |          |
|-----------|----------|----------|----------|----------|----------|----------|
| FLJ32756  | -0.39614 | 0.125638 | -1.99321 | 0.061738 | 0.124904 | -4.63397 |
| IGSF5     | 0.460143 | -0.4743  | 1.992944 | 0.06177  | 0.124942 | -4.63442 |
| ANXA5     | -0.49215 | 0.147273 | -1.99925 | 0.059447 | 0.121271 | -4.63516 |
| LOC100506 | 0.489255 | -0.09439 | 1.998984 | 0.059479 | 0.121323 | -4.63562 |
| NUDT18    | -0.45152 | 0.227769 | -1.9984  | 0.059546 | 0.121448 | -4.63661 |
| EED       | -0.36277 | -0.11565 | -1.99808 | 0.059584 | 0.1215   | -4.63717 |
| TMEM229   | -0.49923 | -0.09946 | -1.99789 | 0.059606 | 0.121532 | -4.63748 |
| TRIM5     | -0.71146 | 0.969429 | -1.99769 | 0.059629 | 0.121567 | -4.63782 |
| SNX9      | -0.43667 | 0.223925 | -1.99739 | 0.059664 | 0.121613 | -4.63833 |
| LIX1L     | -0.34737 | 0.164733 | -1.99706 | 0.059703 | 0.121678 | -4.63889 |
| ROMO1     | -0.44224 | 0.086554 | -1.9965  | 0.059769 | 0.121788 | -4.63985 |
| NUDT4     | -0.33852 | 0.067552 | -1.99608 | 0.059817 | 0.121874 | -4.64056 |
| LUC7L     | -0.54563 | 0.830024 | -1.9952  | 0.059921 | 0.122073 | -4.64206 |
| QRSL1     | -0.69613 | 0.702    | -1.99488 | 0.059958 | 0.122135 | -4.64259 |
| AR        | 0.606098 | -0.21742 | 1.994677 | 0.059982 | 0.122171 | -4.64295 |
| SLC35E4   | 0.371879 | -0.63398 | 1.994472 | 0.060006 | 0.122178 | -4.6433  |
| DCTN3     | -0.21471 | -0.09055 | -1.99443 | 0.06001  | 0.122178 | -4.64336 |
| KCNK1     | 0.772194 | -0.16692 | 1.963613 | 0.06628  | 0.131954 | -4.6434  |
| SPATA17   | 0.999545 | -0.5717  | 1.872681 | 0.091013 | 0.16849  | -4.64353 |
| TMEM116   | 0.548068 | -0.44582 | 1.994256 | 0.060031 | 0.122192 | -4.64366 |
| GPR115    | -0.38552 | 0.095135 | -1.99424 | 0.060034 | 0.122192 | -4.6437  |
| TCTEX1D2  | 0.604487 | -0.03225 | 1.991121 | 0.061151 | 0.123985 | -4.64378 |
| MYH10     | -0.41994 | 0.083987 | -1.99385 | 0.060079 | 0.122255 | -4.64435 |
| ZIK1      | 0.537962 | -0.31437 | 1.99323  | 0.060152 | 0.122378 | -4.6454  |
| FITM2     | 0.703608 | -0.19316 | 1.993098 | 0.060168 | 0.122391 | -4.64563 |
| LHX9      | -0.42197 | 0.169241 | -1.99307 | 0.060171 | 0.122391 | -4.64568 |
| LOC100288 | 0.395547 | -0.30917 | 1.96775  | 0.063975 | 0.128224 | -4.64596 |
| SNAPC4    | -0.24951 | 0.328629 | -1.9929  | 0.060191 | 0.122419 | -4.64597 |
| LOC100133 | -0.75176 | 0.200131 | -1.98931 | 0.061365 | 0.124291 | -4.64682 |
| ANAPC10   | -0.53456 | -0.03402 | -1.98918 | 0.061382 | 0.124311 | -4.64706 |
| METTL16   | 0.477969 | -0.35073 | 1.99193  | 0.060305 | 0.122631 | -4.64761 |
| S1PR5     | 0.828366 | 0.448937 | 1.991905 | 0.060308 | 0.122631 | -4.64766 |
| FAM83C    | 0.585865 | -0.60145 | 1.936168 | 0.068831 | 0.135751 | -4.64788 |
| C20orf111 | -0.43316 | 0.313027 | -1.99149 | 0.060356 | 0.122717 | -4.64835 |
| CDSN      | 0.334735 | -0.23408 | 1.99129  | 0.060381 | 0.122753 | -4.6487  |
| STK4      | -0.57723 | 0.526699 | -1.99113 | 0.0604   | 0.12278  | -4.64898 |
| MYH4      | 0.310651 | -0.10147 | 1.990999 | 0.060415 | 0.122793 | -4.64919 |
| ZBTB45    | 0.328726 | -0.06486 | 1.990967 | 0.060419 | 0.122793 | -4.64925 |
| GBP7      | 0.82158  | -0.37682 | 1.98742  | 0.06159  | 0.124657 | -4.65001 |
| ELOVL5    | -0.54666 | 0.383396 | -1.99037 | 0.06049  | 0.122906 | -4.65027 |
| DDX47     | 0.491806 | -0.25342 | 1.990335 | 0.060493 | 0.122906 | -4.65032 |
| BAZ2B     | -0.7227  | 0.509675 | -1.96237 | 0.065487 | 0.130733 | -4.65066 |
| ZNF250    | -0.56501 | 0.689776 | -1.98968 | 0.060571 | 0.123038 | -4.65143 |
| NCOA4     | 0.844164 | -0.43479 | 1.989499 | 0.060592 | 0.123069 | -4.65174 |
| HERPUD2   | -0.41835 | 0.219794 | -1.98915 | 0.060634 | 0.123129 | -4.65233 |
| RHBDF2    | 1.850016 | 0.670226 | 1.989141 | 0.060635 | 0.123129 | -4.65235 |
| CYP3A4    | -0.37439 | 0.046823 | -1.98192 | 0.063087 | 0.126952 | -4.65283 |

|           |          |          |          |          |          |          |
|-----------|----------|----------|----------|----------|----------|----------|
| GPR137B   | -0.65033 | -0.05271 | -1.98872 | 0.060685 | 0.123202 | -4.65306 |
| TMEM38A   | -0.56464 | 0.739744 | -1.98868 | 0.060689 | 0.123202 | -4.65312 |
| TINAG     | 0.496273 | -0.27859 | 1.98868  | 0.060689 | 0.123202 | -4.65313 |
| JMJD7     | 0.46497  | -0.18767 | 1.988243 | 0.060741 | 0.123282 | -4.65387 |
| SAC3D1    | 0.407336 | -0.02655 | 1.98808  | 0.06076  | 0.123308 | -4.65415 |
| DNMT3L    | -0.9508  | 0.23789  | -1.98713 | 0.060873 | 0.123524 | -4.65576 |
| ARHGAP28  | 0.549843 | -0.34584 | 1.983728 | 0.062032 | 0.125343 | -4.65622 |
| LOC100125 | 0.418808 | -0.40563 | 1.986808 | 0.060912 | 0.123576 | -4.6563  |
| SMURF2    | -0.66488 | 0.341971 | -1.98638 | 0.060963 | 0.123667 | -4.65703 |
| SKI       | -1.10045 | 1.142002 | -1.98589 | 0.061021 | 0.123767 | -4.65786 |
| PPARA     | 0.624154 | 0.025999 | 1.985857 | 0.061025 | 0.123767 | -4.65791 |
| SUGT1P3   | 0.586647 | -0.15298 | 1.985733 | 0.061039 | 0.123785 | -4.65812 |
| HIST2H3D  | -0.49175 | 0.590341 | -1.98511 | 0.061114 | 0.123923 | -4.65918 |
| LAD1      | -0.56641 | 0.145354 | -1.98158 | 0.06229  | 0.125735 | -4.65984 |
| USO1      | -0.46535 | -0.0924  | -1.98458 | 0.061177 | 0.124024 | -4.66007 |
| REG1A     | 0.404796 | -0.14326 | 1.984183 | 0.061224 | 0.124095 | -4.66075 |
| MAD2L1BF  | -0.36917 | 0.174227 | -1.98405 | 0.06124  | 0.124115 | -4.66098 |
| VAMP2     | -0.37679 | 0.410462 | -1.98377 | 0.061274 | 0.124171 | -4.66145 |
| KRT82     | -0.43413 | 0.040237 | -1.97674 | 0.063716 | 0.127863 | -4.66147 |
| RNF150    | -0.85368 | 0.081622 | -1.98058 | 0.062411 | 0.125901 | -4.66152 |
| TDRD3     | 0.549861 | -0.00653 | 1.980384 | 0.062434 | 0.125914 | -4.66184 |
| COMMD1C   | -0.65555 | -0.17235 | -1.98038 | 0.062435 | 0.125914 | -4.66185 |
| MTM1      | -0.43359 | 0.024905 | -1.98348 | 0.061309 | 0.124228 | -4.66195 |
| TRIM56    | -0.41718 | 0.434036 | -1.98331 | 0.061329 | 0.124243 | -4.66223 |
| ANK2      | 0.308616 | -0.09277 | 1.983045 | 0.061361 | 0.124291 | -4.66268 |
| SPINLW1   | -0.29965 | 0.107953 | -1.97979 | 0.062506 | 0.126028 | -4.66285 |
| INO80     | -0.48119 | 0.513568 | -1.98281 | 0.061389 | 0.124314 | -4.66308 |
| GAS8      | -0.66969 | 0.464444 | -1.98221 | 0.06146  | 0.124442 | -4.66409 |
| TLR1      | -0.57384 | -0.00241 | -1.98217 | 0.061465 | 0.124442 | -4.66415 |
| TIMP1     | -0.6905  | 0.616404 | -1.98211 | 0.061472 | 0.124443 | -4.66425 |
| TMEM229I  | -0.6218  | 0.312577 | -1.9787  | 0.062638 | 0.126229 | -4.66468 |
| C9orf37   | -0.3739  | 0.256917 | -1.98114 | 0.061589 | 0.124657 | -4.6659  |
| JRK       | 0.931519 | -0.19849 | 1.981014 | 0.061604 | 0.124671 | -4.66611 |
| PFDN1     | -0.40414 | 0.182272 | -1.98082 | 0.061627 | 0.124705 | -4.66643 |
| SUMF2     | -0.47672 | 0.594316 | -1.98048 | 0.061668 | 0.124775 | -4.66701 |
| PKN3      | 0.457674 | 0.137853 | 1.979707 | 0.061761 | 0.124938 | -4.66832 |
| ZFAND3    | -0.40997 | 0.483302 | -1.97929 | 0.061811 | 0.125013 | -4.66902 |
| PPP1R1C   | -0.45005 | 0.184396 | -1.9792  | 0.061823 | 0.125024 | -4.66919 |
| MFHAS1    | 0.507333 | -0.25882 | 1.978938 | 0.061854 | 0.125074 | -4.66962 |
| UBE2M     | -0.39132 | 0.429459 | -1.97885 | 0.061865 | 0.125084 | -4.66978 |
| SRSF11    | -0.59493 | 0.153098 | -1.97857 | 0.061898 | 0.125137 | -4.67024 |
| CNRIP1    | 0.704388 | -0.09254 | 1.952975 | 0.065819 | 0.131237 | -4.67055 |
| MIR133A1  | 0.368084 | -0.25923 | 1.977969 | 0.061971 | 0.125272 | -4.67126 |
| POC1B     | -0.4496  | -0.053   | -1.97786 | 0.061984 | 0.125279 | -4.67144 |
| DCST1     | 0.409861 | -0.13984 | 1.977832 | 0.061987 | 0.125279 | -4.67149 |
| ARGLU1    | -0.75515 | 0.656072 | -1.97754 | 0.062023 | 0.125337 | -4.67199 |
| ADORA2B   | -0.70826 | 0.674186 | -1.97728 | 0.062054 | 0.125375 | -4.67242 |

|           |          |          |          |          |          |          |
|-----------|----------|----------|----------|----------|----------|----------|
| PRSS27    | -0.6098  | 0.585563 | -1.97685 | 0.062106 | 0.125454 | -4.67315 |
| EDIL3     | 1.230073 | -1.18406 | 1.763442 | 0.105887 | 0.189475 | -4.6732  |
| ZNF346    | 0.241932 | 0.219385 | 1.976584 | 0.062138 | 0.125507 | -4.6736  |
| CISD2     | 0.59024  | -0.00258 | 1.976345 | 0.062167 | 0.125543 | -4.67401 |
| ATAD3A    | 0.36405  | -0.01722 | 1.976329 | 0.062169 | 0.125543 | -4.67403 |
| MGC70870  | -0.64816 | 0.335181 | -1.97626 | 0.062177 | 0.125546 | -4.67415 |
| ZNF491    | -0.25155 | -0.09172 | -1.97614 | 0.062192 | 0.125553 | -4.67435 |
| XPOT      | -0.43914 | -0.02716 | -1.97613 | 0.062193 | 0.125553 | -4.67437 |
| SART1     | -0.39271 | 0.37157  | -1.97513 | 0.062315 | 0.125765 | -4.67606 |
| DNM1L     | -0.73682 | 0.54189  | -1.97503 | 0.062327 | 0.125771 | -4.67623 |
| ZNF222    | -0.3676  | 0.196104 | -1.97496 | 0.062335 | 0.125775 | -4.67635 |
| LOC100655 | 0.456162 | 0.024614 | 1.974606 | 0.062378 | 0.125848 | -4.67694 |
| LASP1     | -0.33174 | 0.456869 | -1.97412 | 0.062437 | 0.125914 | -4.67775 |
| LOC100505 | -0.42285 | 0.079295 | -1.97046 | 0.063641 | 0.127752 | -4.67848 |
| TRIM6     | 0.302773 | -0.09639 | 1.973603 | 0.0625   | 0.126028 | -4.67864 |
| OGFRL1    | 0.532463 | -0.08924 | 1.970249 | 0.063667 | 0.127791 | -4.67884 |
| KIR2DL2   | 0.697636 | 0.09899  | 1.973481 | 0.062515 | 0.126033 | -4.67884 |
| MED4      | -0.31567 | -0.04143 | -1.97289 | 0.062587 | 0.126167 | -4.67985 |
| CDX2      | -0.58233 | -0.21569 | -1.97276 | 0.062603 | 0.126179 | -4.68006 |
| ABCF1     | 0.434399 | -0.11633 | 1.972728 | 0.062607 | 0.126179 | -4.68011 |
| KLHL5     | -0.7196  | 0.458626 | -1.97191 | 0.062707 | 0.126355 | -4.68149 |
| MRPS24    | 0.507084 | -0.26182 | 1.971706 | 0.062731 | 0.126391 | -4.68183 |
| FAM60A    | -0.31595 | 0.297994 | -1.97142 | 0.062766 | 0.126436 | -4.68232 |
| HAX1      | -0.37373 | 0.257697 | -1.97108 | 0.062808 | 0.126506 | -4.68289 |
| WRN       | 0.4861   | -0.26566 | 1.970833 | 0.062838 | 0.126548 | -4.68331 |
| ARHGEF12  | 0.520524 | -0.41041 | 1.970806 | 0.062841 | 0.126548 | -4.68335 |
| LGR5      | -0.52291 | 0.195904 | -1.97067 | 0.062858 | 0.126569 | -4.68359 |
| ASTN2     | -0.23788 | 0.110652 | -1.97059 | 0.062868 | 0.126576 | -4.68372 |
| MEF2C     | 0.546207 | -0.232   | 1.969438 | 0.063009 | 0.126833 | -4.68566 |
| METTTL13  | 0.269629 | -0.12592 | 1.969336 | 0.063021 | 0.126845 | -4.68583 |
| C9orf3    | -0.45689 | 0.669625 | -1.96897 | 0.063066 | 0.126923 | -4.68645 |
| IL36B     | -0.30895 | 0.076171 | -1.96558 | 0.064242 | 0.128656 | -4.68665 |
| H3F3A     | -0.61229 | 0.208136 | -1.9683  | 0.063148 | 0.127061 | -4.68757 |
| RFXAP     | -0.55467 | 0.213136 | -1.96502 | 0.064312 | 0.12876  | -4.68759 |
| LRFN3     | 0.72387  | 0.047893 | 1.968202 | 0.06316  | 0.127073 | -4.68774 |
| OR51D1    | -0.44453 | 0.145724 | -1.96814 | 0.063168 | 0.127076 | -4.68785 |
| CALB2     | 0.70082  | -0.31509 | 1.939783 | 0.068361 | 0.135014 | -4.68787 |
| SOX15     | 0.415572 | -0.48508 | 1.931922 | 0.07143  | 0.139878 | -4.68818 |
| DPYSL3    | -0.276   | 0.070664 | -1.96785 | 0.063204 | 0.127134 | -4.68833 |
| LOC100655 | 0.560461 | -0.20405 | 1.967558 | 0.06324  | 0.12718  | -4.68883 |
| SYN1      | 0.327143 | -0.28262 | 1.967265 | 0.063276 | 0.12724  | -4.68932 |
| CELSR1    | -0.60078 | 0.733494 | -1.96704 | 0.063304 | 0.127283 | -4.68971 |
| PMS2      | -0.49352 | 0.647921 | -1.96682 | 0.063331 | 0.127324 | -4.69007 |
| TTC3      | 0.554741 | -0.07037 | 1.966282 | 0.063397 | 0.127444 | -4.69097 |
| SCAMP1    | -0.72826 | 0.412254 | -1.96601 | 0.063431 | 0.127499 | -4.69144 |
| EIF3L     | 0.531394 | -0.23448 | 1.965899 | 0.063444 | 0.127502 | -4.69162 |
| CCT8      | -0.31582 | 0.216792 | -1.96589 | 0.063445 | 0.127502 | -4.69164 |

|           |          |          |          |          |          |          |
|-----------|----------|----------|----------|----------|----------|----------|
| NUDT16L1  | -0.24971 | 0.193616 | -1.96575 | 0.063462 | 0.127522 | -4.69186 |
| MYF6      | -0.65584 | 0.300044 | -1.9624  | 0.064637 | 0.129331 | -4.69196 |
| JAKMIP2   | 0.412824 | -0.26254 | 1.965349 | 0.063512 | 0.12761  | -4.69254 |
| ZNF485    | 0.547758 | -0.18063 | 1.96519  | 0.063531 | 0.127623 | -4.69281 |
| PTPN12    | -0.63095 | 0.022193 | -1.96519 | 0.063531 | 0.127623 | -4.69281 |
| FOPNL     | -0.246   | 0.01643  | -1.96512 | 0.06354  | 0.127628 | -4.69293 |
| TTC25     | 0.878523 | 0.250983 | 1.965051 | 0.063549 | 0.127628 | -4.69305 |
| WDR13     | -0.28376 | 0.153848 | -1.96498 | 0.063557 | 0.127628 | -4.69316 |
| DSC2      | -0.79937 | 0.662395 | -1.96496 | 0.06356  | 0.127628 | -4.6932  |
| LOC150197 | -0.44082 | 0.161409 | -1.9573  | 0.066123 | 0.131722 | -4.69373 |
| TULP4     | 0.579942 | -0.25422 | 1.905606 | 0.073894 | 0.143838 | -4.69396 |
| NBEAL1    | 0.74174  | -0.53528 | 1.964436 | 0.063624 | 0.127744 | -4.69408 |
| APOA2     | 0.547432 | 0.026745 | 1.964347 | 0.063636 | 0.127752 | -4.69423 |
| ZDHHC18   | -0.61662 | 0.685433 | -1.96377 | 0.063707 | 0.127857 | -4.6952  |
| HECA      | 0.563887 | -0.62433 | 1.9635   | 0.06374  | 0.127899 | -4.69566 |
| SPINT1    | 0.689399 | 0.257379 | 1.963251 | 0.063771 | 0.127947 | -4.69607 |
| SLC5A7    | -0.2389  | 0.047781 | -1.96314 | 0.063785 | 0.127962 | -4.69626 |
| DMWD      | 0.27987  | -0.09053 | 1.962988 | 0.063804 | 0.127986 | -4.69652 |
| MMP25     | -0.68255 | 0.42245  | -1.96246 | 0.063869 | 0.12809  | -4.6974  |
| MRPL13    | -0.90548 | -0.24435 | -1.96241 | 0.063875 | 0.12809  | -4.69748 |
| EBF2      | -0.32077 | -0.05635 | -1.96241 | 0.063875 | 0.12809  | -4.69748 |
| ALDH3A2   | -0.37458 | 0.227246 | -1.96233 | 0.063886 | 0.128098 | -4.69763 |
| SLC23A1   | -0.56399 | 0.253945 | -1.96207 | 0.063918 | 0.128149 | -4.69806 |
| RRBP1     | -0.64063 | 0.53709  | -1.96196 | 0.063932 | 0.128164 | -4.69825 |
| INPP5K    | 0.356316 | -0.17142 | 1.961891 | 0.06394  | 0.128167 | -4.69836 |
| C3orf58   | -0.86964 | 0.29086  | -1.95825 | 0.065156 | 0.130205 | -4.69889 |
| FNDC9     | -0.37207 | 0.055637 | -1.958   | 0.065187 | 0.130228 | -4.69931 |
| TRAPPC5   | 0.445643 | -0.29497 | 1.960939 | 0.064058 | 0.128378 | -4.69996 |
| FLJ40194  | 0.704204 | -0.31931 | 1.901785 | 0.074422 | 0.144507 | -4.70009 |
| UBR3      | -0.58008 | -0.15756 | -1.9608  | 0.064075 | 0.128399 | -4.70019 |
| EZR       | 0.38834  | -0.10705 | 1.960513 | 0.064111 | 0.128459 | -4.70068 |
| FAM102A   | 0.912098 | -0.22529 | 1.960324 | 0.064135 | 0.128481 | -4.70099 |
| DYDC1     | 0.495099 | -0.04393 | 1.960315 | 0.064136 | 0.128481 | -4.70101 |
| IER2      | 0.358751 | -0.02463 | 1.960011 | 0.064174 | 0.128544 | -4.70152 |
| CCRN4L    | -0.41753 | 0.486037 | -1.9599  | 0.064188 | 0.128559 | -4.70171 |
| VPS26B    | -0.59738 | 0.520768 | -1.95902 | 0.064297 | 0.128752 | -4.70319 |
| ABP1      | -0.96283 | 0.506692 | -1.95888 | 0.064314 | 0.12876  | -4.70341 |
| SUGT1     | -0.23982 | 0.325556 | -1.95868 | 0.06434  | 0.128798 | -4.70376 |
| RAB40AL   | -0.46973 | 0.031288 | -1.95847 | 0.064366 | 0.128828 | -4.70411 |
| LY6G5C    | -0.38277 | 0.51435  | -1.95845 | 0.064368 | 0.128828 | -4.70414 |
| RNF186    | -0.61021 | -0.07502 | -1.93213 | 0.068502 | 0.135197 | -4.70505 |
| SIGLEC1   | 1.404642 | -0.0689  | 1.931798 | 0.068546 | 0.135242 | -4.7056  |
| PAX2      | 0.414844 | -0.1806  | 1.953463 | 0.065758 | 0.131154 | -4.70686 |
| TBXAS1    | -0.61623 | 0.033279 | -1.9566  | 0.0646   | 0.129279 | -4.70725 |
| CDT1      | -0.57263 | 0.708275 | -1.95629 | 0.064639 | 0.129331 | -4.70777 |
| MAFG      | -0.39102 | 0.200052 | -1.9562  | 0.06465  | 0.12934  | -4.70792 |
| KCNH1     | -0.55365 | 0.125597 | -1.95571 | 0.064711 | 0.12944  | -4.70873 |

|           |          |          |          |          |          |          |
|-----------|----------|----------|----------|----------|----------|----------|
| TAX1BP3   | -0.52472 | 0.666423 | -1.9557  | 0.064713 | 0.12944  | -4.70876 |
| CTXN3     | 0.469923 | -0.24624 | 1.948119 | 0.067288 | 0.13354  | -4.7089  |
| CTAGE10P  | -0.88276 | 0.352049 | -1.95551 | 0.064736 | 0.129472 | -4.70907 |
| FANCF     | 0.477794 | -0.53618 | 1.955343 | 0.064758 | 0.129502 | -4.70935 |
| GRIK5     | 0.359044 | -0.30298 | 1.955128 | 0.064785 | 0.129543 | -4.70971 |
| SCN10A    | -0.2626  | -0.24643 | -1.94717 | 0.067409 | 0.133708 | -4.71046 |
| SLC28A2   | 0.610176 | -0.77498 | 1.951232 | 0.06604  | 0.13157  | -4.71058 |
| C2orf69   | -0.69731 | 0.248437 | -1.95447 | 0.064867 | 0.129694 | -4.71081 |
| DCUN1D1   | -0.47606 | -0.03851 | -1.95434 | 0.064883 | 0.129713 | -4.71103 |
| CALHM1    | 0.393794 | -0.23082 | 1.954214 | 0.0649   | 0.129733 | -4.71125 |
| GIF       | 0.831031 | -0.81398 | 1.80529  | 0.092783 | 0.171025 | -4.7119  |
| FAM71D    | 0.575285 | -0.40348 | 1.92435  | 0.070389 | 0.13828  | -4.71313 |
| ADAMTS6   | -0.42639 | 0.085077 | -1.95302 | 0.06505  | 0.130007 | -4.71325 |
| FCER2     | -0.84239 | 1.047631 | -1.95302 | 0.06505  | 0.130007 | -4.71325 |
| CD1B      | 0.357525 | -0.46812 | 1.850035 | 0.085734 | 0.161013 | -4.71352 |
| TBC1D17   | -0.32121 | 0.441003 | -1.9521  | 0.065166 | 0.130212 | -4.71479 |
| ARHGAP18  | -0.85195 | 0.620781 | -1.95204 | 0.065174 | 0.130215 | -4.71489 |
| CPNE5     | -0.4635  | 0.517373 | -1.95185 | 0.065198 | 0.130236 | -4.71521 |
| ZNF483    | -0.73449 | 0.229556 | -1.94836 | 0.066405 | 0.132176 | -4.71535 |
| PKIB      | 0.630948 | -0.47223 | 1.944088 | 0.067805 | 0.134208 | -4.71554 |
| ZNF148    | 0.394935 | -0.43727 | 1.951647 | 0.065223 | 0.130274 | -4.71555 |
| WFIKK2    | 0.375217 | -0.18535 | 1.95113  | 0.065289 | 0.130391 | -4.71641 |
| SIDT2     | 0.575103 | -0.32633 | 1.950686 | 0.065345 | 0.13049  | -4.71716 |
| KHDRBS2   | -0.75617 | 0.167106 | -1.94677 | 0.066608 | 0.132552 | -4.71799 |
| SCHIP1    | 0.801706 | -0.33311 | 1.837871 | 0.091236 | 0.168792 | -4.71839 |
| ABCC5     | -1.03807 | 0.979758 | -1.94975 | 0.065464 | 0.130714 | -4.71873 |
| AGT       | 0.845913 | -0.6707  | 1.946315 | 0.066666 | 0.132629 | -4.71875 |
| METTL23   | -0.30456 | -0.07771 | -1.94952 | 0.065493 | 0.130733 | -4.71911 |
| MRPL35    | -0.4099  | 0.343008 | -1.94947 | 0.065499 | 0.130733 | -4.71919 |
| ZSCAN21   | -0.5698  | 0.5455   | -1.94946 | 0.0655   | 0.130733 | -4.71921 |
| C1orf56   | -0.44318 | 0.480552 | -1.94903 | 0.065554 | 0.130828 | -4.71992 |
| LOC393078 | 0.35596  | -0.38214 | 1.94884  | 0.065579 | 0.130864 | -4.72025 |
| LOC158696 | -0.47731 | 0.047748 | -1.94877 | 0.065588 | 0.130869 | -4.72037 |
| GNAT1     | 0.693156 | -0.03872 | 1.948126 | 0.06567  | 0.131018 | -4.72144 |
| MRPS12    | 0.53672  | -0.21072 | 1.947762 | 0.065716 | 0.131084 | -4.72205 |
| ISX       | -0.41892 | -0.00483 | -1.94737 | 0.065766 | 0.131157 | -4.72271 |
| MEG3      | 0.790885 | -0.52904 | 1.947187 | 0.065789 | 0.13119  | -4.72301 |
| TAPT1     | -0.37646 | 0.00041  | -1.94637 | 0.065893 | 0.131357 | -4.72438 |
| FBXO34    | -0.48797 | -0.03528 | -1.94629 | 0.065903 | 0.131364 | -4.72451 |
| C2orf40   | 0.811989 | -0.21615 | 1.942825 | 0.067114 | 0.133303 | -4.72454 |
| LOC81691  | -0.76495 | 0.468794 | -1.94616 | 0.06592  | 0.131385 | -4.72474 |
| KLHL18    | -0.59375 | 0.435596 | -1.94588 | 0.065956 | 0.131442 | -4.7252  |
| C5orf24   | -0.44343 | 0.532265 | -1.94577 | 0.06597  | 0.131456 | -4.72538 |
| SLC22A2   | -0.32925 | 0.07826  | -1.94555 | 0.065998 | 0.1315   | -4.72575 |
| MRS2      | -0.43614 | 0.129059 | -1.94429 | 0.066159 | 0.13178  | -4.72786 |
| RYK       | -0.60191 | 0.257314 | -1.94386 | 0.066214 | 0.131863 | -4.72858 |
| CERS4     | -0.48027 | 0.50998  | -1.94371 | 0.066233 | 0.131888 | -4.72883 |

|           |          |          |          |          |          |          |
|-----------|----------|----------|----------|----------|----------|----------|
| NRP1      | -0.37402 | 0.146164 | -1.94342 | 0.06627  | 0.131947 | -4.7293  |
| ELAVL4    | 0.570408 | -0.39673 | 1.942661 | 0.066368 | 0.132115 | -4.73058 |
| LOC286461 | -0.3969  | 0.073113 | -1.91612 | 0.070629 | 0.138668 | -4.73138 |
| RNF216P1  | -0.32635 | 0.459359 | -1.94106 | 0.066574 | 0.132498 | -4.73325 |
| ERMAP     | -0.62699 | 0.519238 | -1.94064 | 0.066628 | 0.132577 | -4.73395 |
| SSX1      | -0.46178 | 0.126623 | -1.94059 | 0.066634 | 0.132577 | -4.73403 |
| CTC1      | -0.3588  | 0.452084 | -1.94027 | 0.066676 | 0.132634 | -4.73457 |
| RECQL4    | -0.46306 | 0.586838 | -1.94021 | 0.066683 | 0.132635 | -4.73467 |
| NXF5      | 0.449188 | -0.272   | 1.939435 | 0.066783 | 0.13282  | -4.73596 |
| PSG5      | -0.39524 | 0.030038 | -1.93938 | 0.06679  | 0.132821 | -4.73605 |
| SLC6A19   | -0.44641 | 0.252929 | -1.93912 | 0.066824 | 0.132874 | -4.73649 |
| C1orf173  | 0.37207  | -0.26203 | 1.93892  | 0.06685  | 0.132912 | -4.73682 |
| MRPL19    | -0.50763 | 0.395759 | -1.93882 | 0.066863 | 0.132925 | -4.73699 |
| BLID      | -0.28347 | 0.147769 | -1.93861 | 0.066889 | 0.132964 | -4.73733 |
| DYX1C1    | -0.64065 | -0.10996 | -1.93814 | 0.066951 | 0.133073 | -4.73812 |
| LOC100506 | 0.445482 | -0.31638 | 1.938042 | 0.066963 | 0.133073 | -4.73828 |
| C1QC      | -0.9593  | 0.82962  | -1.93803 | 0.066964 | 0.133073 | -4.7383  |
| ZNF674    | 0.390484 | 0.011503 | 1.929939 | 0.069649 | 0.137031 | -4.73879 |
| POLR2E    | -0.34176 | 0.509354 | -1.93773 | 0.067003 | 0.133137 | -4.7388  |
| SLC27A4   | -0.46593 | 0.837265 | -1.93765 | 0.067014 | 0.133144 | -4.73894 |
| ERGIC2    | -0.47536 | 0.265969 | -1.93701 | 0.067097 | 0.133296 | -4.74001 |
| FAM126B   | -1.07314 | 0.563331 | -1.93695 | 0.067104 | 0.133297 | -4.7401  |
| NCAN      | 0.347534 | -0.37528 | 1.936695 | 0.067138 | 0.133322 | -4.74053 |
| MGC4294   | 0.419597 | -0.09967 | 1.936424 | 0.067173 | 0.133379 | -4.74098 |
| LOC100127 | 0.224594 | -0.19623 | 1.936237 | 0.067197 | 0.133413 | -4.74129 |
| LOC100129 | 0.69473  | -0.04434 | 1.93598  | 0.06723  | 0.133466 | -4.74172 |
| VAR52     | 0.40613  | 0.080933 | 1.935791 | 0.067255 | 0.133501 | -4.74204 |
| KANSL3    | -0.45914 | 0.363532 | -1.93554 | 0.067287 | 0.13354  | -4.74245 |
| FHIT      | 0.539301 | 0.040381 | 1.935463 | 0.067297 | 0.133545 | -4.74258 |
| KCNIP4    | -0.45284 | 0.184404 | -1.93519 | 0.067333 | 0.133591 | -4.74304 |
| SHANK1    | 0.562283 | -0.72307 | 1.93518  | 0.067334 | 0.133591 | -4.74305 |
| C1QA      | -1.14042 | 1.003276 | -1.93507 | 0.067348 | 0.133605 | -4.74323 |
| HEY1      | 0.920716 | -0.19957 | 1.934572 | 0.067413 | 0.133708 | -4.74407 |
| GMIP      | -0.37562 | 0.25309  | -1.93444 | 0.06743  | 0.133727 | -4.74428 |
| TOX2      | -0.72289 | 0.569918 | -1.93416 | 0.067467 | 0.133786 | -4.74475 |
| SLC25A19  | -0.40044 | 0.442423 | -1.93402 | 0.067485 | 0.13381  | -4.74499 |
| FERMT2    | -0.8232  | 0.258873 | -1.90771 | 0.071769 | 0.1404   | -4.74515 |
| ZNF275    | -0.28871 | 0.083291 | -1.93379 | 0.067515 | 0.13385  | -4.74537 |
| PPP4R1L   | -0.23494 | 0.046989 | -1.93363 | 0.067536 | 0.133868 | -4.74563 |
| KIAA1217  | 0.206593 | -0.04132 | 1.933584 | 0.067542 | 0.133868 | -4.74571 |
| EHD4      | 0.444295 | -0.16913 | 1.933312 | 0.067577 | 0.133911 | -4.74616 |
| NTHL1     | 0.448072 | 0.01844  | 1.933174 | 0.067595 | 0.133933 | -4.74639 |
| SIGLEC8   | 0.929123 | -0.38015 | 1.933031 | 0.067614 | 0.133946 | -4.74663 |
| PTPN20B   | -0.73393 | 0.168228 | -1.93302 | 0.067616 | 0.133946 | -4.74665 |
| TADA3     | -0.4113  | 0.329665 | -1.93271 | 0.067656 | 0.134002 | -4.74717 |
| ALDOC     | 0.34034  | -0.16241 | 1.932697 | 0.067658 | 0.134002 | -4.74719 |
| KIAA1033  | -0.91268 | 0.40384  | -1.93248 | 0.067686 | 0.134045 | -4.74755 |

|           |          |          |          |          |          |          |
|-----------|----------|----------|----------|----------|----------|----------|
| TMEM25    | 0.778674 | -0.20814 | 1.932398 | 0.067697 | 0.134053 | -4.74768 |
| SAMD3     | 0.848033 | -0.05959 | 1.932032 | 0.067745 | 0.134134 | -4.74829 |
| C20orf202 | 0.196654 | -0.05661 | 1.92811  | 0.069031 | 0.136103 | -4.74889 |
| ASTE1     | -0.37071 | 0.185592 | -1.93167 | 0.067792 | 0.134208 | -4.7489  |
| PCBP2     | 0.399169 | -0.21995 | 1.931546 | 0.067808 | 0.134208 | -4.7491  |
| POLE      | -1.26505 | 0.838869 | -1.93154 | 0.067809 | 0.134208 | -4.74912 |
| APOPT1    | -0.32865 | 0.104942 | -1.93123 | 0.067849 | 0.13423  | -4.74962 |
| HEBP1     | 0.600501 | -0.31858 | 1.931181 | 0.067856 | 0.13423  | -4.74971 |
| HPS4      | -0.60396 | 0.399751 | -1.93117 | 0.067857 | 0.13423  | -4.74973 |
| LOC100130 | -0.86431 | 0.362244 | -1.93116 | 0.067859 | 0.13423  | -4.74975 |
| KLHL25    | 0.615646 | -0.12552 | 1.931106 | 0.067866 | 0.13423  | -4.74983 |
| LSM14B    | -0.32888 | 0.383629 | -1.93109 | 0.067868 | 0.13423  | -4.74986 |
| SYNPO2    | -0.48294 | 0.13486  | -1.93108 | 0.067869 | 0.13423  | -4.74987 |
| PAPL      | 0.243909 | -0.17035 | 1.923133 | 0.070551 | 0.138543 | -4.74994 |
| ENAM      | -0.48546 | 0.040063 | -1.93064 | 0.067927 | 0.134315 | -4.75061 |
| TONSL     | -0.65457 | 0.832783 | -1.93063 | 0.067928 | 0.134315 | -4.75062 |
| PDAP1     | -0.47984 | 0.338775 | -1.9306  | 0.067932 | 0.134315 | -4.75067 |
| LOC100240 | -0.62438 | 0.380282 | -1.93011 | 0.067996 | 0.134428 | -4.75149 |
| LOC646627 | -0.72652 | -1.18813 | -1.32059 | 0.325448 | 0.450024 | -4.75153 |
| CUL9      | 0.302532 | -0.11192 | 1.929188 | 0.068117 | 0.134654 | -4.75302 |
| MPP1      | 0.644348 | -0.26806 | 1.928836 | 0.068164 | 0.134728 | -4.75361 |
| HBBP1     | 0.654335 | -0.16731 | 1.928796 | 0.068169 | 0.134728 | -4.75367 |
| MMP13     | 1.274536 | -1.33489 | 1.595576 | 0.155453 | 0.255091 | -4.75382 |
| DNPEP     | 0.473195 | -0.11549 | 1.92848  | 0.06821  | 0.134791 | -4.7542  |
| COL6A5    | -0.41765 | 0.017247 | -1.92845 | 0.068214 | 0.134791 | -4.75425 |
| ZNF335    | -0.39364 | 0.315105 | -1.92829 | 0.068235 | 0.134819 | -4.75451 |
| NUMB      | -0.73474 | 0.556074 | -1.92806 | 0.068265 | 0.134865 | -4.75489 |
| MYO9B     | -0.52174 | 0.595523 | -1.92776 | 0.068305 | 0.13493  | -4.7554  |
| XAB2      | -0.4884  | 0.573423 | -1.92744 | 0.068347 | 0.134999 | -4.75592 |
| ZCWPW1    | -0.3796  | 0.233999 | -1.92728 | 0.068368 | 0.135014 | -4.75619 |
| ZNF24     | -0.74244 | 0.198666 | -1.92698 | 0.068408 | 0.135079 | -4.7567  |
| ST7-AS1   | 0.619167 | -0.13254 | 1.863043 | 0.081076 | 0.154189 | -4.75677 |
| CATX-1    | -0.39637 | 0.110086 | -1.92677 | 0.068436 | 0.13512  | -4.75704 |
| LOC387891 | 0.808279 | -0.48485 | 1.918682 | 0.071147 | 0.139433 | -4.75722 |
| ZNF367    | -0.57452 | 0.193071 | -1.92644 | 0.06848  | 0.135187 | -4.75759 |
| OR52K3P   | 0.838645 | 0.084258 | 1.926397 | 0.068485 | 0.135187 | -4.75766 |
| C12orf53  | 0.319642 | -0.44609 | 1.926354 | 0.06849  | 0.135187 | -4.75773 |
| C1QTNF4   | 0.704747 | 0.164194 | 1.926106 | 0.068523 | 0.135215 | -4.75814 |
| PRINS     | 0.527872 | -0.62535 | 1.92609  | 0.068525 | 0.135215 | -4.75817 |
| BRI3      | -0.44335 | 0.331194 | -1.92545 | 0.068609 | 0.135354 | -4.75923 |
| AGL       | -0.73506 | -0.25906 | -1.91704 | 0.071368 | 0.139796 | -4.75989 |
| FAM71C    | 0.317223 | -0.14684 | 1.91672  | 0.071411 | 0.139867 | -4.76042 |
| GIMAP2    | -0.82964 | -0.25091 | -1.92465 | 0.068716 | 0.13555  | -4.76056 |
| AKT1      | -0.51795 | 0.608884 | -1.92445 | 0.068742 | 0.135588 | -4.76089 |
| ZMYM1     | -0.46434 | -0.12981 | -1.91953 | 0.070171 | 0.137935 | -4.76303 |
| LOC389701 | -0.51776 | 0.131383 | -1.89655 | 0.073307 | 0.142995 | -4.76336 |
| ALDH1L1   | 0.351469 | 0.010623 | 1.922778 | 0.068964 | 0.135998 | -4.76366 |



|           |          |          |          |          |          |          |
|-----------|----------|----------|----------|----------|----------|----------|
| NBPF9     | -0.56674 | -0.01005 | -1.91457 | 0.071701 | 0.1403   | -4.76393 |
| PPP1R14B  | -0.53478 | 0.481653 | -1.92228 | 0.069029 | 0.136103 | -4.76448 |
| KRT10     | -0.43947 | 0.232716 | -1.92218 | 0.069043 | 0.136113 | -4.76465 |
| LIPT2     | -0.48996 | 0.203285 | -1.92193 | 0.069077 | 0.136166 | -4.76508 |
| PPIL4     | -0.76207 | 0.379923 | -1.91819 | 0.07035  | 0.138217 | -4.76523 |
| UHRF1BP1  | -0.42301 | 0.524204 | -1.92109 | 0.069189 | 0.136373 | -4.76647 |
| RBP7      | 0.740532 | -0.09623 | 1.921015 | 0.069198 | 0.136378 | -4.76659 |
| FAM73A    | -0.60514 | 0.243092 | -1.9173  | 0.070471 | 0.138412 | -4.76671 |
| ABL2      | -0.62502 | 0.794306 | -1.92087 | 0.069217 | 0.136389 | -4.76682 |
| FCRLB     | -0.41249 | 0.442379 | -1.92087 | 0.069218 | 0.136389 | -4.76683 |
| RNF10     | 0.521842 | -0.221   | 1.920767 | 0.069231 | 0.136397 | -4.767   |
| KRTAP13-4 | 0.29423  | -0.21137 | 1.9207   | 0.06924  | 0.136397 | -4.76711 |
| FAM102B   | 0.210721 | -0.45026 | 1.920681 | 0.069243 | 0.136397 | -4.76714 |
| TLN1      | -0.65364 | 0.915234 | -1.92032 | 0.069291 | 0.136479 | -4.76774 |
| ASPG      | 0.35859  | -0.24429 | 1.920033 | 0.069329 | 0.13654  | -4.76821 |
| LOC100294 | -0.60979 | 0.300548 | -1.91988 | 0.069349 | 0.136566 | -4.76847 |
| MYEOV2    | -0.4522  | 0.051465 | -1.9195  | 0.069401 | 0.136653 | -4.7691  |
| PPP2CB    | -0.37074 | 0.117699 | -1.91926 | 0.069432 | 0.136702 | -4.76949 |
| WFDC5     | 0.451185 | -0.26044 | 1.919103 | 0.069453 | 0.13673  | -4.76975 |
| CCDC12    | -0.33153 | 0.375524 | -1.91895 | 0.069474 | 0.136755 | -4.77    |
| CCDC58    | 0.620707 | -0.12327 | 1.891998 | 0.073943 | 0.143885 | -4.77076 |
| IMMT      | -0.43486 | 0.466251 | -1.91834 | 0.069556 | 0.136903 | -4.77102 |
| PDE11A    | -0.27386 | 0.026869 | -1.91824 | 0.069568 | 0.136914 | -4.77118 |
| ABCF2     | -0.41632 | 0.302868 | -1.91813 | 0.069583 | 0.13693  | -4.77136 |
| KCNK10    | 0.513436 | -0.50399 | 1.897614 | 0.076098 | 0.147063 | -4.77139 |
| APOL6     | -0.81219 | 0.61968  | -1.91807 | 0.069591 | 0.136933 | -4.77146 |
| CHD8      | -0.59709 | 0.808645 | -1.91734 | 0.06969  | 0.137099 | -4.77268 |
| HMOX2     | 0.42722  | 0.001616 | 1.916972 | 0.069739 | 0.137181 | -4.77328 |
| ATOH1     | 0.431937 | -0.51492 | 1.835993 | 0.08957  | 0.166449 | -4.77385 |
| PCSK7     | -0.56329 | 0.627902 | -1.91644 | 0.06981  | 0.137307 | -4.77416 |
| SUV420H2  | -0.32325 | 0.6388   | -1.91588 | 0.069886 | 0.137443 | -4.77509 |
| KDELC2    | -0.39919 | 0.236753 | -1.91486 | 0.070022 | 0.137697 | -4.77677 |
| HIVEP3    | 0.565468 | -0.15085 | 1.914791 | 0.070032 | 0.137702 | -4.77689 |
| PDXP      | -0.37598 | 0.618205 | -1.9143  | 0.070098 | 0.137819 | -4.77771 |
| CYB561    | 0.618008 | 0.059336 | 1.914113 | 0.070123 | 0.137854 | -4.77801 |
| GPBP1     | -0.45151 | 0.095485 | -1.9135  | 0.070206 | 0.137989 | -4.77902 |
| ZNF184    | -0.68429 | -0.03999 | -1.9097  | 0.071498 | 0.139995 | -4.77918 |
| LOC100507 | -0.34487 | 0.012523 | -1.90949 | 0.071526 | 0.140011 | -4.77952 |
| CABIN1    | 0.450798 | 0.239699 | 1.912798 | 0.0703   | 0.138161 | -4.78018 |
| TMEM63A   | 0.368062 | -0.00402 | 1.912743 | 0.070308 | 0.138162 | -4.78027 |
| LOC100125 | -0.22462 | -0.00043 | -1.91257 | 0.070332 | 0.138195 | -4.78057 |
| ROCK1P1   | -0.83381 | 0.421256 | -1.90433 | 0.073098 | 0.142673 | -4.78059 |
| C14orf135 | -0.51865 | -0.02089 | -1.88534 | 0.074882 | 0.145286 | -4.78159 |
| RXRG      | -0.56588 | -0.04212 | -1.91186 | 0.070427 | 0.138341 | -4.78174 |
| FXYD3     | 0.563053 | -0.13474 | 1.884465 | 0.075006 | 0.145468 | -4.783   |
| RAB6B     | -0.49832 | 0.182452 | -1.911   | 0.070543 | 0.138541 | -4.78315 |
| C7orf64   | 0.214749 | -0.06462 | 1.906889 | 0.071881 | 0.140577 | -4.78379 |

|           |          |          |          |          |          |          |
|-----------|----------|----------|----------|----------|----------|----------|
| LOC283788 | -0.9669  | 0.212621 | -1.91059 | 0.0706   | 0.138624 | -4.78384 |
| MARVELD2  | 0.282479 | -0.42006 | 1.910125 | 0.070662 | 0.138695 | -4.7846  |
| PRELP     | 0.371181 | -0.18244 | 1.910112 | 0.070664 | 0.138695 | -4.78462 |
| KRI1      | 0.371956 | -0.08944 | 1.910101 | 0.070666 | 0.138695 | -4.78464 |
| DDX50     | -0.48177 | 0.111182 | -1.91006 | 0.070671 | 0.138695 | -4.78471 |
| IL23R     | 0.959166 | -0.43091 | 1.738774 | 0.113123 | 0.199292 | -4.78505 |
| FLT3      | -0.86183 | 0.492074 | -1.87106 | 0.079896 | 0.152522 | -4.78517 |
| TIA1      | -0.61975 | 0.472616 | -1.90954 | 0.070741 | 0.138819 | -4.78556 |
| PEA15     | -0.48423 | 0.865061 | -1.90936 | 0.070766 | 0.138854 | -4.78586 |
| EZH1      | -0.31122 | 0.208332 | -1.90911 | 0.070799 | 0.138905 | -4.78627 |
| WFDC10A   | -0.28009 | 0.036848 | -1.88237 | 0.075304 | 0.14593  | -4.7864  |
| CXCR2     | 0.570455 | -0.03561 | 1.908896 | 0.070829 | 0.138949 | -4.78663 |
| CRISPLD2  | -0.9778  | 0.977029 | -1.90871 | 0.070855 | 0.138986 | -4.78694 |
| DPYSL2    | 0.377828 | -0.08742 | 1.908599 | 0.070869 | 0.139001 | -4.78712 |
| RIMS4     | 0.271094 | -0.13944 | 1.908246 | 0.070918 | 0.139081 | -4.7877  |
| TAOK1     | -0.45049 | 0.061246 | -1.90815 | 0.070931 | 0.139094 | -4.78787 |
| HOXB6     | -0.53602 | 0.214078 | -1.90798 | 0.070954 | 0.139125 | -4.78814 |
| SLC6A4    | 0.680754 | 0.148512 | 1.907411 | 0.071031 | 0.139248 | -4.78908 |
| CPS1      | -0.32084 | 0.048858 | -1.9072  | 0.07106  | 0.139291 | -4.78943 |
| EXOC2     | -0.53473 | 0.170852 | -1.9069  | 0.071101 | 0.139358 | -4.78992 |
| RPS6KL1   | -0.33737 | 0.001418 | -1.90603 | 0.07122  | 0.139556 | -4.79136 |
| FLVCR1    | 0.605266 | 0.036798 | 1.905999 | 0.071224 | 0.139556 | -4.7914  |
| INPP1     | -0.29843 | 0.474047 | -1.90587 | 0.071242 | 0.139578 | -4.79163 |
| LINC00475 | 0.366302 | -0.35352 | 1.891716 | 0.075829 | 0.146615 | -4.79197 |
| CNNM1     | -0.39849 | -0.01005 | -1.90552 | 0.071289 | 0.139657 | -4.79219 |
| BDH2      | -0.47235 | 0.021321 | -1.90449 | 0.071431 | 0.139878 | -4.7939  |
| PMS1      | 0.212557 | -0.04251 | 1.903926 | 0.071508 | 0.14     | -4.79482 |
| RHO       | 0.621239 | -0.12707 | 1.90378  | 0.071528 | 0.140011 | -4.79506 |
| WDR82     | -0.78035 | 0.502302 | -1.90364 | 0.071546 | 0.140021 | -4.79529 |
| SKA2      | -0.4612  | 0.352644 | -1.90364 | 0.071547 | 0.140021 | -4.79529 |
| TSPY3     | -1.50698 | 0.351297 | -1.89933 | 0.072921 | 0.142384 | -4.79616 |
| CCS       | 0.397349 | -0.03063 | 1.902497 | 0.071704 | 0.1403   | -4.79717 |
| ARHGEF37  | 0.619303 | -0.05985 | 1.902198 | 0.071745 | 0.140366 | -4.79767 |
| NTM       | -0.56485 | 0.152146 | -1.90153 | 0.071836 | 0.140517 | -4.79876 |
| SNX33     | 0.390073 | 0.231678 | 1.874714 | 0.076401 | 0.147549 | -4.79878 |
| FER1L4    | -0.4968  | 0.619623 | -1.90135 | 0.071861 | 0.140552 | -4.79906 |
| MRPL52    | -0.40088 | 0.348564 | -1.90104 | 0.071905 | 0.140609 | -4.79958 |
| NRBF2     | -0.71884 | 0.710999 | -1.9002  | 0.07202  | 0.140821 | -4.80096 |
| GRHL2     | -0.53549 | 0.192606 | -1.89091 | 0.074967 | 0.145421 | -4.80236 |
| CYTH2     | -0.32759 | 0.372811 | -1.8991  | 0.072172 | 0.141104 | -4.80277 |
| ADNP      | 0.381855 | -0.43518 | 1.898915 | 0.072198 | 0.141139 | -4.80307 |
| AIMP2     | -0.37797 | 0.361016 | -1.89839 | 0.07227  | 0.141266 | -4.80393 |
| C2orf77   | 0.457749 | -0.06904 | 1.893897 | 0.073677 | 0.143502 | -4.80502 |
| SLC35G5   | -0.29913 | 0.063859 | -1.89727 | 0.072426 | 0.141557 | -4.80578 |
| TTLL4     | -0.46959 | 0.631637 | -1.897   | 0.072463 | 0.141615 | -4.80621 |
| LOC100506 | 0.87788  | -0.74993 | 1.862624 | 0.080029 | 0.152686 | -4.80637 |
| ANAPC13   | -0.41615 | 0.357369 | -1.8966  | 0.072518 | 0.141709 | -4.80687 |

|           |          |          |          |          |          |          |
|-----------|----------|----------|----------|----------|----------|----------|
| LOC100507 | -0.59631 | 0.689697 | -1.89605 | 0.072595 | 0.141845 | -4.80778 |
| PCYOX1    | -0.45407 | 0.143403 | -1.89595 | 0.072608 | 0.141857 | -4.80793 |
| LOC100506 | -0.58674 | -0.19683 | -1.86562 | 0.078603 | 0.150713 | -4.80807 |
| BMP8B     | -0.54352 | 0.930567 | -1.89587 | 0.07262  | 0.141865 | -4.80807 |
| OR4D5     | 0.926809 | -0.84556 | 1.720953 | 0.11641  | 0.20371  | -4.80965 |
| KRT80     | -0.76428 | 0.330241 | -1.89462 | 0.072793 | 0.142191 | -4.81012 |
| MIA3      | -0.71721 | 0.807093 | -1.89427 | 0.072842 | 0.142271 | -4.81069 |
| ACTR3B    | -0.57348 | 0.58076  | -1.89407 | 0.07287  | 0.14231  | -4.81102 |
| AKAP12    | 0.329596 | -0.42442 | 1.894028 | 0.072876 | 0.14231  | -4.8111  |
| BEST3     | -0.49268 | 0.156933 | -1.89355 | 0.072942 | 0.142411 | -4.81188 |
| TUSC1     | -0.72389 | 0.586537 | -1.88939 | 0.074309 | 0.144355 | -4.81236 |
| PLCB4     | 0.466033 | -0.08003 | 1.893234 | 0.072987 | 0.142483 | -4.8124  |
| LOC389797 | -0.2492  | -0.0241  | -1.89317 | 0.072995 | 0.142486 | -4.8125  |
| KLHDC9    | -0.48038 | 0.253023 | -1.89229 | 0.073119 | 0.142698 | -4.81395 |
| STOML3    | -0.63735 | 0.023567 | -1.89193 | 0.073169 | 0.142781 | -4.81453 |
| CKB       | 0.652042 | -0.06665 | 1.891592 | 0.073216 | 0.14286  | -4.81509 |
| SLC2A4RG  | 0.455722 | 0.013835 | 1.891376 | 0.073247 | 0.142905 | -4.81545 |
| HHIP      | -0.4168  | 0.251243 | -1.89107 | 0.073289 | 0.142974 | -4.81594 |
| SPRYD3    | -0.21131 | 0.291883 | -1.89089 | 0.073315 | 0.142997 | -4.81625 |
| GPR172B   | 0.286217 | -0.21763 | 1.890687 | 0.073343 | 0.143037 | -4.81658 |
| NME1      | -0.56372 | 0.431438 | -1.89062 | 0.073352 | 0.14304  | -4.81668 |
| MIAT      | -1.03737 | 0.175798 | -1.89032 | 0.073394 | 0.143108 | -4.81717 |
| AGBL4     | 0.369856 | 0.010333 | 1.886212 | 0.074758 | 0.145059 | -4.81754 |
| FABP1     | 0.651036 | 0.164914 | 1.889805 | 0.073467 | 0.143215 | -4.81802 |
| CEACAM15  | -0.78623 | 0.46584  | -1.88978 | 0.073471 | 0.143215 | -4.81807 |
| CHD7      | -0.38181 | 0.412213 | -1.88977 | 0.073471 | 0.143215 | -4.81807 |
| C14orf1   | -0.42716 | 0.384431 | -1.8897  | 0.073482 | 0.143222 | -4.8182  |
| HEPACAM   | -0.25271 | -0.05256 | -1.88952 | 0.073507 | 0.143254 | -4.81849 |
| NCL       | 0.492541 | -0.07833 | 1.889475 | 0.073513 | 0.143254 | -4.81856 |
| SDHAF2    | -0.16664 | -0.00239 | -1.88914 | 0.073561 | 0.143321 | -4.81912 |
| RNF130    | -0.53485 | 0.44578  | -1.88913 | 0.073562 | 0.143321 | -4.81913 |
| LOXL2     | 0.263504 | -0.24542 | 1.888536 | 0.073645 | 0.143469 | -4.8201  |
| H2AFV     | -0.31271 | 0.108544 | -1.88836 | 0.07367  | 0.143502 | -4.82038 |
| FADS6     | -0.33701 | -0.26316 | -1.85778 | 0.079761 | 0.152354 | -4.8206  |
| C12orf36  | 0.337386 | -0.32437 | 1.888201 | 0.073693 | 0.143518 | -4.82065 |
| GOT1L1    | -0.23893 | 0.044013 | -1.86081 | 0.078431 | 0.150473 | -4.8212  |
| LOC100136 | 0.505422 | -0.10831 | 1.857199 | 0.079848 | 0.152474 | -4.82152 |
| HOXA6     | 0.347831 | -0.22928 | 1.887443 | 0.073799 | 0.143712 | -4.82189 |
| LYPD4     | 0.453979 | -0.54871 | 1.824681 | 0.085815 | 0.161091 | -4.82204 |
| CACNG4    | 0.289711 | -0.16037 | 1.887087 | 0.07385  | 0.143795 | -4.82247 |
| CREG1     | -0.61302 | 0.302701 | -1.88698 | 0.073865 | 0.143811 | -4.82265 |
| FBXO32    | 0.486637 | -0.22083 | 1.88675  | 0.073897 | 0.143838 | -4.82303 |
| RAD21L1   | -0.58042 | 0.266192 | -1.88672 | 0.073901 | 0.143838 | -4.82307 |
| SMG7      | 0.307032 | 0.028826 | 1.886503 | 0.073932 | 0.143884 | -4.82343 |
| DGCR6     | 0.466904 | -0.16563 | 1.886397 | 0.073947 | 0.143885 | -4.8236  |
| PRPF4B    | -0.47841 | -0.12289 | -1.88634 | 0.073955 | 0.143886 | -4.8237  |
| KLHL10    | 0.509335 | -0.26915 | 1.886174 | 0.073979 | 0.143917 | -4.82397 |

|           |          |          |          |          |          |          |
|-----------|----------|----------|----------|----------|----------|----------|
| MRPS30    | -0.42759 | 0.362252 | -1.88603 | 0.073999 | 0.143933 | -4.82421 |
| PAK1IP1   | 0.741084 | -0.01513 | 1.886013 | 0.074001 | 0.143933 | -4.82423 |
| LOC388588 | 1.10471  | -0.70795 | 1.885785 | 0.074033 | 0.143981 | -4.82461 |
| LOC100506 | 0.441099 | -0.27898 | 1.871145 | 0.078778 | 0.150946 | -4.82488 |
| EIF3G     | 0.488509 | -0.14196 | 1.885607 | 0.074059 | 0.144016 | -4.8249  |
| C9orf85   | -0.67742 | 0.40445  | -1.88129 | 0.075457 | 0.146137 | -4.82554 |
| GHRL      | -0.49012 | 0.188942 | -1.88507 | 0.074135 | 0.144149 | -4.82578 |
| KEAP1     | -0.37717 | 0.326598 | -1.88493 | 0.074154 | 0.144174 | -4.826   |
| STX12     | -0.33033 | -0.1287  | -1.88481 | 0.074172 | 0.144176 | -4.8262  |
| R3HDM2    | -0.67073 | 0.760496 | -1.88478 | 0.074175 | 0.144176 | -4.82625 |
| CCDC88C   | 0.688748 | 0.160321 | 1.884767 | 0.074177 | 0.144176 | -4.82627 |
| TBC1D13   | -0.24145 | 0.158072 | -1.88462 | 0.074199 | 0.144189 | -4.82652 |
| SLC22A31  | -0.56369 | 0.557093 | -1.88461 | 0.074199 | 0.144189 | -4.82652 |
| CNTN6     | -0.43349 | 0.109643 | -1.87003 | 0.07894  | 0.151183 | -4.82666 |
| PLXNA4    | -0.67355 | 0.181309 | -1.88451 | 0.074213 | 0.144202 | -4.82668 |
| MAZ       | -0.57089 | 0.832592 | -1.88442 | 0.074227 | 0.144214 | -4.82684 |
| CCDC73    | 0.706926 | -0.00024 | 1.880302 | 0.075599 | 0.146285 | -4.82715 |
| MTERFD1   | -0.52681 | 0.285073 | -1.8838  | 0.074314 | 0.144355 | -4.82785 |
| TLN2      | 0.979745 | -0.46716 | 1.883679 | 0.074332 | 0.144375 | -4.82805 |
| PRIM2     | 0.735219 | -0.07408 | 1.883555 | 0.074349 | 0.144395 | -4.82825 |
| FAM153A   | 0.525728 | -0.35763 | 1.879548 | 0.075707 | 0.146421 | -4.82837 |
| MGST3     | 0.406355 | -0.54012 | 1.883442 | 0.074365 | 0.144412 | -4.82844 |
| FAM167A   | -1.57768 | 0.952513 | -1.85625 | 0.079107 | 0.151413 | -4.82852 |
| SEPSECS   | -0.37606 | 0.184561 | -1.87945 | 0.075721 | 0.146434 | -4.82853 |
| OSMR      | 0.448379 | -0.60595 | 1.874554 | 0.077301 | 0.148859 | -4.82875 |
| LOC100133 | -0.33732 | -0.11002 | -1.88295 | 0.074436 | 0.14452  | -4.82925 |
| LOC100495 | -0.33397 | 0.128987 | -1.88255 | 0.074493 | 0.144612 | -4.8299  |
| SKIV2L    | -0.33162 | 0.331079 | -1.88251 | 0.074498 | 0.144612 | -4.82997 |
| ZNF285    | -0.7079  | 0.553559 | -1.85135 | 0.080722 | 0.15368  | -4.83084 |
| MPZL3     | 0.660874 | -0.33105 | 1.881695 | 0.074614 | 0.144822 | -4.83129 |
| SNTG2     | -0.52705 | 0.047393 | -1.85098 | 0.080778 | 0.153756 | -4.83143 |
| Mar-01    | -0.99751 | 0.928783 | -1.88076 | 0.074747 | 0.145059 | -4.83282 |
| SH3BGRL2  | 0.821918 | -0.34124 | 1.880698 | 0.074756 | 0.145059 | -4.83292 |
| CNIH3     | -0.5625  | 0.021575 | -1.85334 | 0.079541 | 0.152065 | -4.83319 |
| STON1     | -0.70763 | 0.312522 | -1.87955 | 0.07492  | 0.145344 | -4.8348  |
| C4orf27   | -0.71222 | 0.351379 | -1.8753  | 0.076317 | 0.147427 | -4.83526 |
| RHD       | -0.70119 | 0.007714 | -1.87897 | 0.075002 | 0.145468 | -4.83574 |
| LCK       | 0.970639 | -0.22946 | 1.878847 | 0.07502  | 0.145481 | -4.83594 |
| TCF7      | 1.069859 | -0.38955 | 1.878221 | 0.07511  | 0.14564  | -4.83697 |
| ST3GAL1   | -0.25871 | 0.486461 | -1.87765 | 0.075191 | 0.145783 | -4.83789 |
| PPAN      | 0.455887 | -0.04292 | 1.877594 | 0.075199 | 0.145786 | -4.83799 |
| HOXA2     | -0.263   | -0.04416 | -1.87335 | 0.076598 | 0.147869 | -4.83841 |
| TOP2A     | -1.36204 | 0.862826 | -1.87716 | 0.075261 | 0.145891 | -4.83869 |
| HSD17B4   | -0.33209 | 0.338691 | -1.87701 | 0.075283 | 0.145919 | -4.83894 |
| FCGR3B    | -0.88697 | 0.765892 | -1.87691 | 0.075298 | 0.14593  | -4.83911 |
| C10orf32  | -0.50974 | -0.43558 | -1.87279 | 0.076679 | 0.147952 | -4.83932 |
| LOC729678 | 0.434354 | -0.1067  | 1.876702 | 0.075327 | 0.145957 | -4.83944 |

|           |          |          |          |          |          |          |
|-----------|----------|----------|----------|----------|----------|----------|
| CSNK1E    | -0.44379 | 0.752918 | -1.87667 | 0.075332 | 0.145957 | -4.8395  |
| SLC5A12   | 1.045252 | -0.7814  | 1.698747 | 0.120627 | 0.209295 | -4.84012 |
| AGSK1     | -0.39518 | 0.463518 | -1.87618 | 0.075402 | 0.146077 | -4.84029 |
| OR2B2     | 0.402083 | -0.33412 | 1.875736 | 0.075466 | 0.146137 | -4.84102 |
| ANKRD57   | -0.3476  | 0.088096 | -1.87571 | 0.07547  | 0.146137 | -4.84107 |
| DCTN6     | -0.47131 | -0.30005 | -1.87555 | 0.075493 | 0.146151 | -4.84133 |
| ETS1      | 0.52727  | -0.29286 | 1.87553  | 0.075496 | 0.146151 | -4.84135 |
| HS6ST1    | -0.41023 | 0.578416 | -1.87546 | 0.075506 | 0.146151 | -4.84148 |
| AGPAT9    | -0.77512 | 0.28916  | -1.87545 | 0.075507 | 0.146151 | -4.84149 |
| LOC401176 | -0.29046 | 0.239362 | -1.87531 | 0.075527 | 0.146176 | -4.84172 |
| SMC2      | -0.97521 | 0.611353 | -1.87491 | 0.075584 | 0.146272 | -4.84236 |
| CPAMD8    | 0.596408 | -0.32939 | 1.874576 | 0.075633 | 0.146337 | -4.84291 |
| SSB       | -0.59313 | 0.320394 | -1.87441 | 0.075657 | 0.146349 | -4.84319 |
| SPATA8    | 0.320094 | -0.41448 | 1.87439  | 0.07566  | 0.146349 | -4.84321 |
| KRT3      | 0.486005 | -0.52688 | 1.874378 | 0.075661 | 0.146349 | -4.84323 |
| LRCH2     | -0.34693 | 0.048603 | -1.87036 | 0.077031 | 0.148456 | -4.84325 |
| SHROOM4   | -0.55505 | 0.236379 | -1.87011 | 0.077068 | 0.148511 | -4.84365 |
| TDG       | -0.42709 | 0.269441 | -1.87372 | 0.075757 | 0.146489 | -4.84431 |
| CPT1C     | 0.267899 | -0.1633  | 1.873057 | 0.075852 | 0.146645 | -4.84538 |
| TAS2R3    | 0.394178 | -0.41318 | 1.858218 | 0.080683 | 0.153623 | -4.84545 |
| TSPEAR    | 1.416229 | -0.13515 | 1.640908 | 0.127038 | 0.217814 | -4.8456  |
| SNHG5     | 0.730818 | -0.79865 | 1.872198 | 0.075976 | 0.14687  | -4.84678 |
| SPPL2B    | -0.30748 | 0.379322 | -1.87212 | 0.075987 | 0.146877 | -4.8469  |
| TAF4      | 0.580088 | -0.32522 | 1.871965 | 0.07601  | 0.146906 | -4.84716 |
| SLC5A8    | -0.62275 | 0.283636 | -1.84374 | 0.080988 | 0.154051 | -4.84856 |
| SWI5      | -0.34041 | 0.524919 | -1.87059 | 0.076209 | 0.147262 | -4.8494  |
| KCNJ2     | -0.90704 | 0.21633  | -1.87052 | 0.076219 | 0.147266 | -4.84951 |
| C1orf190  | 0.471233 | 0.036166 | 1.869963 | 0.0763   | 0.147409 | -4.85042 |
| HSPA1A    | -0.90748 | 0.830093 | -1.86965 | 0.076345 | 0.147467 | -4.85092 |
| DNM3      | 0.620333 | -0.48804 | 1.869247 | 0.076404 | 0.147549 | -4.85159 |
| C7orf54   | 0.326861 | -0.10948 | 1.869204 | 0.07641  | 0.147549 | -4.85166 |
| LOC100288 | -0.65595 | 0.459581 | -1.86498 | 0.077817 | 0.149639 | -4.85195 |
| LOC399855 | 0.339108 | -0.39138 | 1.868235 | 0.076551 | 0.147807 | -4.85323 |
| FAM82B    | -0.4002  | -0.16925 | -1.868   | 0.076585 | 0.147858 | -4.85361 |
| CCNB3     | 0.355841 | -0.10771 | 1.83256  | 0.084584 | 0.159432 | -4.85381 |
| ABAT      | -0.72823 | 0.628993 | -1.86781 | 0.076613 | 0.147875 | -4.85393 |
| EPYC      | 0.252505 | -0.02568 | 1.867777 | 0.076618 | 0.147875 | -4.85398 |
| TMEM88    | -0.59943 | 0.573418 | -1.86773 | 0.076624 | 0.147875 | -4.85405 |
| LOC100507 | -0.5835  | 0.88979  | -1.86767 | 0.076634 | 0.147879 | -4.85415 |
| GPC5      | -0.68496 | 0.453483 | -1.86318 | 0.078081 | 0.149987 | -4.85484 |
| ZDHHC11   | -0.70978 | 0.646064 | -1.86724 | 0.076697 | 0.147971 | -4.85485 |
| LOC100288 | 0.374184 | -0.31758 | 1.858151 | 0.079706 | 0.152332 | -4.85506 |
| LOC441495 | -0.87973 | 0.451175 | -1.86684 | 0.076754 | 0.148067 | -4.85549 |
| LOC100276 | -0.38979 | 0.003775 | -1.86672 | 0.076772 | 0.148086 | -4.85569 |
| REC8      | -0.28556 | 0.477218 | -1.86657 | 0.076794 | 0.148105 | -4.85594 |
| CPT1A     | -0.48852 | 0.323558 | -1.86655 | 0.076796 | 0.148105 | -4.85596 |
| XAF1      | -1.35502 | 1.094625 | -1.86638 | 0.076822 | 0.148141 | -4.85625 |

|           |          |          |          |          |          |          |
|-----------|----------|----------|----------|----------|----------|----------|
| GCNT3     | 0.214693 | -0.03374 | 1.866317 | 0.076831 | 0.148142 | -4.85635 |
| ABCA10    | 0.711336 | -0.00668 | 1.862032 | 0.078251 | 0.150187 | -4.8567  |
| RAPGEF2   | -0.63299 | 0.421786 | -1.86609 | 0.076863 | 0.14819  | -4.85671 |
| PIR       | -0.67597 | 0.592073 | -1.86576 | 0.076913 | 0.148271 | -4.85726 |
| C5orf62   | -0.43921 | 0.541312 | -1.86528 | 0.076982 | 0.148386 | -4.85803 |
| CNTF      | 0.395001 | -0.24892 | 1.865245 | 0.076988 | 0.148386 | -4.85809 |
| GREB1     | -0.17762 | 0.035524 | -1.86416 | 0.077146 | 0.148648 | -4.85985 |
| ARHGAP1   | 0.324514 | 0.039644 | 1.864096 | 0.077156 | 0.148652 | -4.85995 |
| PCDHGA9   | -0.42887 | 0.085176 | -1.86382 | 0.077196 | 0.148714 | -4.8604  |
| SHROOM1   | -0.39634 | 0.162723 | -1.8637  | 0.077214 | 0.148735 | -4.8606  |
| NUDT10    | 0.677342 | -0.54234 | 1.777879 | 0.099053 | 0.180008 | -4.86062 |
| ZNF236    | 0.283279 | -0.30189 | 1.863451 | 0.077251 | 0.148791 | -4.861   |
| MSL2      | -0.49666 | 0.177913 | -1.86337 | 0.077262 | 0.148798 | -4.86113 |
| ZNF804A   | 0.187288 | -0.03943 | 1.858838 | 0.078723 | 0.150884 | -4.86185 |
| RANBP9    | -0.9694  | 0.861897 | -1.86267 | 0.077365 | 0.148968 | -4.86227 |
| TMEM123   | -0.83612 | 0.528257 | -1.86235 | 0.077412 | 0.149043 | -4.86279 |
| MS4A6A    | -0.74615 | -0.10837 | -1.86206 | 0.077455 | 0.149111 | -4.86326 |
| STXBP5    | -0.6422  | 0.261783 | -1.86181 | 0.077492 | 0.149168 | -4.86367 |
| ITM2B     | -0.68027 | 0.646489 | -1.86158 | 0.077526 | 0.149206 | -4.86404 |
| LOC28544: | 0.388815 | -0.20061 | 1.861552 | 0.07753  | 0.149206 | -4.86408 |
| CHIT1     | -1.55421 | 0.665964 | -1.86152 | 0.077535 | 0.149206 | -4.86414 |
| HTR1D     | 0.333978 | -0.22466 | 1.861192 | 0.077583 | 0.149276 | -4.86467 |
| TSPAN18   | 0.578348 | -0.53673 | 1.861166 | 0.077586 | 0.149276 | -4.86471 |
| CELF3     | 0.396143 | -0.19876 | 1.860642 | 0.077664 | 0.14941  | -4.86556 |
| CTNNBIP1  | 0.450721 | -0.19756 | 1.860421 | 0.077696 | 0.149458 | -4.86592 |
| HTT       | -0.31892 | 0.332261 | -1.86024 | 0.077722 | 0.149494 | -4.8662  |
| FAM204A   | -0.48321 | 0.162226 | -1.85954 | 0.077827 | 0.149639 | -4.86735 |
| CD48      | -0.56734 | -0.03604 | -1.85954 | 0.077827 | 0.149639 | -4.86735 |
| LOC10028: | 0.299676 | -0.22687 | 1.859488 | 0.077834 | 0.149639 | -4.86743 |
| TMEM55A   | -0.66935 | 0.125692 | -1.85947 | 0.077836 | 0.149639 | -4.86745 |
| EGLN3     | 0.788606 | 0.261577 | 1.795419 | 0.090527 | 0.167783 | -4.86745 |
| PRM3      | 0.278097 | -0.23874 | 1.859277 | 0.077865 | 0.14968  | -4.86777 |
| TOP1MT    | 0.537052 | -0.19401 | 1.859209 | 0.077875 | 0.149685 | -4.86788 |
| AGFG2     | 0.650621 | -0.18258 | 1.859156 | 0.077883 | 0.149685 | -4.86797 |
| ZBTB46    | 0.440692 | -0.16068 | 1.858945 | 0.077914 | 0.14973  | -4.86831 |
| PPAPDC1A  | -0.50786 | 0.239093 | -1.85863 | 0.07796  | 0.149804 | -4.86882 |
| C2orf50   | -0.81953 | 0.123435 | -1.85447 | 0.079372 | 0.151818 | -4.86888 |
| RFWD2     | -0.45997 | 0.077939 | -1.8581  | 0.07804  | 0.149943 | -4.86969 |
| CCDC130   | -0.27456 | 0.184739 | -1.85786 | 0.078075 | 0.149987 | -4.87007 |
| TUBAL3    | 0.547718 | -0.19152 | 1.826567 | 0.084523 | 0.15939  | -4.87012 |
| RCVRN     | -0.75716 | 0.479104 | -1.85778 | 0.078087 | 0.149987 | -4.8702  |
| LOC14970: | 0.455258 | -0.07825 | 1.857731 | 0.078094 | 0.149987 | -4.87028 |
| FAM74A3   | 0.48857  | -0.52356 | 1.853594 | 0.079503 | 0.152008 | -4.87028 |
| DOK5      | -0.46382 | 0.211809 | -1.85756 | 0.078119 | 0.15002  | -4.87055 |
| TCEAL7    | 0.673608 | -0.26518 | 1.821781 | 0.086272 | 0.161763 | -4.8707  |
| UCHL3     | -0.42171 | 0.220767 | -1.85717 | 0.078178 | 0.150119 | -4.87119 |
| TMEM181   | 0.521403 | -0.2377  | 1.85708  | 0.07819  | 0.150128 | -4.87133 |

|           |          |          |          |          |          |          |
|-----------|----------|----------|----------|----------|----------|----------|
| SCIN      | 0.623773 | -0.22088 | 1.84796  | 0.081233 | 0.154458 | -4.87133 |
| COIL      | -0.35355 | 0.102114 | -1.85693 | 0.078212 | 0.150155 | -4.87157 |
| SMPDL3A   | -0.73682 | 0.272788 | -1.85679 | 0.078234 | 0.150183 | -4.87181 |
| HAUS6     | -0.71434 | 0.079595 | -1.85667 | 0.078251 | 0.150187 | -4.872   |
| KLRC3     | 0.796192 | -0.27778 | 1.852212 | 0.07971  | 0.152332 | -4.8725  |
| HPS6      | -0.22328 | 0.190936 | -1.85625 | 0.078314 | 0.150293 | -4.87268 |
| CLEC4C    | 0.990987 | -0.5357  | 1.799389 | 0.093751 | 0.172549 | -4.87286 |
| BCL2L14   | -0.42914 | 0.157768 | -1.85611 | 0.078335 | 0.150305 | -4.8729  |
| RPAIN     | -0.49261 | 0.152425 | -1.8561  | 0.078336 | 0.150305 | -4.87292 |
| ACTRT1    | -0.56581 | 0.224752 | -1.85195 | 0.079749 | 0.152344 | -4.87292 |
| ELAVL1    | -0.56263 | 0.682043 | -1.85539 | 0.078442 | 0.150479 | -4.87407 |
| CD3G      | 0.892251 | -0.4894  | 1.85507  | 0.078489 | 0.150554 | -4.87458 |
| GRHPR     | -0.28012 | 0.264617 | -1.85497 | 0.078504 | 0.150568 | -4.87475 |
| NEURL     | 0.624367 | -0.0665  | 1.854529 | 0.07857  | 0.150679 | -4.87546 |
| RPSAP52   | 0.428513 | -0.541   | 1.854343 | 0.078597 | 0.150713 | -4.87576 |
| HPSE2     | -0.32463 | -0.07521 | -1.85018 | 0.080015 | 0.152674 | -4.87577 |
| LXN       | -0.40875 | 0.09511  | -1.85385 | 0.078671 | 0.150829 | -4.87655 |
| SLC24A2   | 0.406095 | -0.20969 | 1.853713 | 0.078691 | 0.150854 | -4.87678 |
| LRCH1     | -0.4778  | 0.301526 | -1.85359 | 0.078709 | 0.150873 | -4.87697 |
| LOC10013: | -0.5753  | 0.250847 | -1.8534  | 0.078738 | 0.150899 | -4.87728 |
| PPP1R42   | 0.477609 | -0.21125 | 1.844146 | 0.081811 | 0.155391 | -4.8774  |
| C18orf54  | -0.52404 | 0.252085 | -1.85315 | 0.078775 | 0.150946 | -4.87769 |
| LMF1      | 0.927156 | 0.158686 | 1.853066 | 0.078788 | 0.15095  | -4.87782 |
| KLHDC4    | -0.47665 | 0.471801 | -1.85298 | 0.0788   | 0.150959 | -4.87796 |
| EXOC8     | -0.54254 | 0.065873 | -1.81699 | 0.087032 | 0.162845 | -4.87819 |
| STBD1     | -0.69416 | 0.252815 | -1.8525  | 0.078873 | 0.151083 | -4.87874 |
| MEGF6     | 0.486659 | -0.01505 | 1.852336 | 0.078897 | 0.151115 | -4.879   |
| ZNF193    | -0.3128  | 0.374793 | -1.85164 | 0.079001 | 0.151286 | -4.88014 |
| GLP1R     | -0.37707 | -0.01245 | -1.85126 | 0.079058 | 0.151371 | -4.88075 |
| IKBKAP    | -0.45838 | 0.322946 | -1.85124 | 0.079061 | 0.151371 | -4.88078 |
| NET1      | 0.38665  | -0.11621 | 1.851083 | 0.079084 | 0.1514   | -4.88103 |
| POLE4     | -0.4027  | 0.101326 | -1.85102 | 0.079093 | 0.151402 | -4.88113 |
| RTKN      | 0.434412 | 0.23291  | 1.850618 | 0.079154 | 0.151489 | -4.88178 |
| VEZF1     | -0.45594 | 0.121213 | -1.85034 | 0.079196 | 0.151554 | -4.88223 |
| WIF1      | -1.08879 | 0.307746 | -1.84574 | 0.080684 | 0.153623 | -4.88289 |
| CLEC18B   | -0.52598 | 0.690012 | -1.84966 | 0.079297 | 0.151733 | -4.88332 |
| SERTAD4   | 0.358563 | -0.02218 | 1.845247 | 0.080759 | 0.153734 | -4.88368 |
| ANKRD30B  | -0.62606 | -0.08794 | -1.84943 | 0.079331 | 0.151765 | -4.88369 |
| HRG       | 0.36583  | -0.3076  | 1.849421 | 0.079333 | 0.151765 | -4.88371 |
| C8orf33   | -0.42577 | 0.410554 | -1.8494  | 0.079337 | 0.151765 | -4.88375 |
| NUP160    | -0.50359 | 0.487876 | -1.84893 | 0.079407 | 0.151869 | -4.8845  |
| C22orf15  | 0.370347 | -0.16792 | 1.848741 | 0.079436 | 0.151908 | -4.88481 |
| APOB      | 0.442676 | 0.082375 | 1.848693 | 0.079443 | 0.151908 | -4.88489 |
| PARG      | -0.58131 | 0.097125 | -1.84397 | 0.080952 | 0.153998 | -4.88573 |
| FAM134C   | -0.30108 | 0.177654 | -1.84741 | 0.079636 | 0.152232 | -4.88695 |
| CATR1     | 0.603212 | 0.045862 | 1.846906 | 0.079712 | 0.152332 | -4.88777 |
| EMCN      | -0.35835 | 0.057731 | -1.84686 | 0.079719 | 0.152332 | -4.88784 |

|           |          |          |          |          |          |          |
|-----------|----------|----------|----------|----------|----------|----------|
| MMP12     | -0.48059 | -0.20471 | -1.8375  | 0.082827 | 0.15694  | -4.88796 |
| SMCP      | 0.341546 | -0.21287 | 1.846705 | 0.079742 | 0.152344 | -4.8881  |
| OR13D1    | 0.466322 | -0.21367 | 1.846335 | 0.079798 | 0.152409 | -4.88869 |
| PLEKHF1   | 0.665731 | 0.096256 | 1.846237 | 0.079813 | 0.152423 | -4.88885 |
| IFITM4P   | -0.97584 | 0.768304 | -1.84575 | 0.079887 | 0.152522 | -4.88964 |
| CAMK4     | 0.523621 | -0.19612 | 1.845695 | 0.079895 | 0.152522 | -4.88972 |
| PABPC1    | 0.466054 | -0.39329 | 1.845565 | 0.079915 | 0.152542 | -4.88993 |
| MRPS25    | 0.370682 | -0.08652 | 1.845401 | 0.079939 | 0.152575 | -4.8902  |
| PSD4      | -0.34649 | 0.529804 | -1.84524 | 0.079963 | 0.152605 | -4.89045 |
| RP9P      | 0.612111 | 0.035185 | 1.845102 | 0.079985 | 0.152631 | -4.89068 |
| MOB1B     | 0.612612 | -0.05833 | 1.844634 | 0.080055 | 0.152722 | -4.89143 |
| ATP2C2    | -1.3042  | 0.928495 | -1.84432 | 0.080103 | 0.152798 | -4.89194 |
| ASRGL1    | -0.43526 | 0.593653 | -1.84423 | 0.080117 | 0.15281  | -4.89209 |
| HDGFRP3   | -0.77946 | 0.535285 | -1.80778 | 0.08851  | 0.164976 | -4.89254 |
| NPM1      | -0.56982 | 0.489158 | -1.84393 | 0.080162 | 0.152868 | -4.89257 |
| TMEM218   | -0.27377 | 0.178928 | -1.84391 | 0.080165 | 0.152868 | -4.8926  |
| MAGEB6    | -0.41003 | 0.061479 | -1.84387 | 0.080171 | 0.152868 | -4.89267 |
| TRPM1     | -0.65604 | -0.06428 | -1.84368 | 0.080199 | 0.152907 | -4.89297 |
| PLEKHO2   | -0.4405  | 0.390327 | -1.84342 | 0.080239 | 0.152966 | -4.89338 |
| HIST2H2AE | -0.63894 | 0.551775 | -1.84338 | 0.080246 | 0.152966 | -4.89346 |
| LRTM2     | -0.32829 | -0.19111 | -1.81512 | 0.085437 | 0.160581 | -4.89403 |
| RPL34     | 0.742058 | -1.35719 | 1.8424   | 0.080394 | 0.153234 | -4.89503 |
| OR1F1     | 0.383361 | -0.29674 | 1.842121 | 0.080437 | 0.1533   | -4.89548 |
| CLSPN     | -0.83303 | 0.538137 | -1.83779 | 0.081896 | 0.155521 | -4.89561 |
| C18orf10  | 0.321521 | -0.1062  | 1.84187  | 0.080475 | 0.153358 | -4.89589 |
| USP22     | -0.40849 | 0.488704 | -1.84178 | 0.080488 | 0.15336  | -4.89603 |
| ZFYVE20   | -0.35053 | -0.03498 | -1.84176 | 0.080492 | 0.15336  | -4.89607 |
| CD46      | -0.9405  | 0.359863 | -1.84167 | 0.080505 | 0.15337  | -4.8962  |
| UGT8      | -0.42258 | -0.01749 | -1.84162 | 0.080512 | 0.15337  | -4.89628 |
| CBWD5     | -0.48001 | 0.509596 | -1.84113 | 0.080588 | 0.153498 | -4.89708 |
| LOC100128 | 0.626806 | -0.17985 | 1.836783 | 0.08205  | 0.15575  | -4.89722 |
| USP49     | -0.73029 | -0.48422 | -1.77169 | 0.095649 | 0.175374 | -4.89782 |
| GNPTAB    | -0.59594 | 0.314843 | -1.84066 | 0.08066  | 0.153613 | -4.89784 |
| KRT75     | 0.470278 | -0.45333 | 1.831246 | 0.083794 | 0.158282 | -4.89788 |
| TRMT2A    | -0.41109 | 0.57744  | -1.84063 | 0.080664 | 0.153613 | -4.89788 |
| TMEM146   | -0.50723 | -0.07251 | -1.81249 | 0.085858 | 0.161124 | -4.8982  |
| ATG7      | -0.35154 | 0.472182 | -1.83964 | 0.080814 | 0.15381  | -4.89947 |
| PPP2R1A   | 0.253506 | -0.0353  | 1.83956  | 0.080827 | 0.153819 | -4.8996  |
| PIGR      | 0.287108 | -0.17122 | 1.811218 | 0.086061 | 0.161441 | -4.9002  |
| GNB2L1    | 0.56255  | -0.30832 | 1.839075 | 0.080901 | 0.153933 | -4.90038 |
| KRTAP13-1 | 0.360849 | -0.20481 | 1.839066 | 0.080902 | 0.153933 | -4.9004  |
| CPVL      | 0.862566 | -0.4375  | 1.838781 | 0.080946 | 0.153998 | -4.90086 |
| FOXJ3     | 0.296589 | -0.24531 | 1.837942 | 0.081074 | 0.154189 | -4.90221 |
| SHISA5    | -0.38965 | 0.582441 | -1.83786 | 0.081087 | 0.154194 | -4.90234 |
| C8orf59   | 0.571677 | -0.03751 | 1.832722 | 0.082676 | 0.156684 | -4.9037  |
| TFB2M     | -0.49076 | 0.01507  | -1.8368  | 0.081249 | 0.154473 | -4.90404 |
| CDH16     | -0.36037 | 0.072162 | -1.8083  | 0.086529 | 0.16212  | -4.9048  |



|           |          |          |          |          |          |          |
|-----------|----------|----------|----------|----------|----------|----------|
| TJP2      | -0.70218 | 0.980265 | -1.83622 | 0.081339 | 0.154628 | -4.90497 |
| GAS1      | 0.343194 | -0.07646 | 1.808135 | 0.086556 | 0.162139 | -4.90507 |
| NAT2      | -0.29157 | 0.117968 | -1.83608 | 0.081359 | 0.154652 | -4.90519 |
| TNFRSF11E | -0.36333 | 0.02928  | -1.83594 | 0.081381 | 0.154675 | -4.90542 |
| TOM1L2    | -0.43496 | 0.618955 | -1.8359  | 0.081387 | 0.154675 | -4.90548 |
| LOC399900 | -0.51051 | 0.470038 | -1.8356  | 0.081434 | 0.15475  | -4.90598 |
| STAP1     | 0.164235 | -0.02191 | 1.831019 | 0.08294  | 0.157062 | -4.90642 |
| RPL35     | 0.816226 | -0.85026 | 1.834384 | 0.081621 | 0.155079 | -4.90792 |
| BASP1     | -0.66976 | 0.557879 | -1.83436 | 0.081624 | 0.155079 | -4.90795 |
| NAA10     | 0.251413 | -0.06222 | 1.834217 | 0.081646 | 0.155107 | -4.90819 |
| C20orf26  | 0.651325 | -0.32441 | 1.801656 | 0.088501 | 0.164976 | -4.90923 |
| RPTN      | 0.92798  | -0.3859  | 1.771139 | 0.093596 | 0.172313 | -4.90987 |
| LHPP      | -0.49935 | 0.666261 | -1.83317 | 0.081808 | 0.155391 | -4.90987 |
| KIAA0748  | 0.903189 | -0.3074  | 1.833036 | 0.081828 | 0.155408 | -4.91008 |
| WFDC1     | -0.80739 | 0.438875 | -1.8323  | 0.081942 | 0.155593 | -4.91126 |
| LOC729088 | -0.60232 | 0.377562 | -1.82795 | 0.083417 | 0.157767 | -4.9113  |
| ANKMY2    | -0.45574 | 0.406321 | -1.8317  | 0.082035 | 0.15575  | -4.91223 |
| CCR3      | 0.24569  | -0.07188 | 1.831582 | 0.082053 | 0.15575  | -4.91242 |
| LOC646808 | 0.401327 | -0.03334 | 1.831562 | 0.082056 | 0.15575  | -4.91245 |
| FAM25A    | -0.33595 | -0.04001 | -1.83147 | 0.08207  | 0.155761 | -4.91259 |
| LOC400604 | -0.75793 | 0.67941  | -1.83131 | 0.082095 | 0.155793 | -4.91285 |
| FAM124A   | 0.163289 | -0.03266 | 1.831101 | 0.082127 | 0.15584  | -4.91319 |
| RSPH9     | -0.2684  | 0.310566 | -1.83033 | 0.082247 | 0.156051 | -4.91442 |
| LOC100133 | -0.4877  | -0.00924 | -1.83026 | 0.082257 | 0.156056 | -4.91453 |
| CCDC78    | 0.375841 | 0.032669 | 1.829956 | 0.082305 | 0.156131 | -4.91502 |
| UTP3      | -0.34173 | 0.334599 | -1.82916 | 0.082428 | 0.15635  | -4.91629 |
| MARK1     | -0.63597 | 0.28581  | -1.82907 | 0.082442 | 0.156353 | -4.91644 |
| TNKS2     | -0.35618 | 0.184223 | -1.82905 | 0.082445 | 0.156353 | -4.91647 |
| ZNF704    | -0.4997  | 0.012176 | -1.82852 | 0.082528 | 0.156494 | -4.91733 |
| NOL3      | -0.49136 | 0.316467 | -1.82825 | 0.08257  | 0.156558 | -4.91776 |
| LOC90246  | 0.263372 | -0.23241 | 1.828083 | 0.082596 | 0.156587 | -4.91802 |
| ISM2      | -0.46165 | 0.091808 | -1.82805 | 0.082601 | 0.156587 | -4.91807 |
| LINC00221 | -0.51014 | 0.096382 | -1.828   | 0.08261  | 0.156588 | -4.91816 |
| TCAM1P    | 0.564391 | -0.36634 | 1.823501 | 0.084113 | 0.158756 | -4.91838 |
| SRM       | -0.51699 | 0.960506 | -1.82783 | 0.082635 | 0.15662  | -4.91842 |
| DHX38     | 0.347995 | -0.29865 | 1.82715  | 0.082741 | 0.156792 | -4.91952 |
| DCXR      | 0.400945 | -0.14939 | 1.826316 | 0.082871 | 0.157008 | -4.92085 |
| STC2      | 0.502257 | -0.04601 | 1.826071 | 0.082909 | 0.157062 | -4.92124 |
| SETX      | -0.34338 | 0.217479 | -1.82602 | 0.082918 | 0.157062 | -4.92133 |
| MRPL4     | -0.46108 | 0.641138 | -1.82595 | 0.082929 | 0.157062 | -4.92144 |
| GLMN      | -0.42758 | 0.040088 | -1.82592 | 0.082933 | 0.157062 | -4.92149 |
| GRIK3     | -0.30753 | 0.061506 | -1.82577 | 0.082957 | 0.15708  | -4.92173 |
| RASGEF1A  | -0.63703 | 0.344285 | -1.8253  | 0.08303  | 0.157202 | -4.92248 |
| PRKACG    | 0.22918  | -0.26158 | 1.820913 | 0.08452  | 0.15939  | -4.92249 |
| CD84      | -0.56696 | 0.345126 | -1.82519 | 0.083047 | 0.15722  | -4.92265 |
| ATP6V1G3  | 0.848273 | -0.70027 | 1.801001 | 0.09074  | 0.168097 | -4.92299 |
| RDH11     | 0.947099 | -0.29932 | 1.792513 | 0.090001 | 0.167059 | -4.92349 |

|           |          |          |          |          |          |          |
|-----------|----------|----------|----------|----------|----------|----------|
| OR1N2     | 0.346447 | -0.50462 | 1.824442 | 0.083164 | 0.157425 | -4.92385 |
| OSGEP     | -0.24672 | 0.299324 | -1.82439 | 0.083172 | 0.157425 | -4.92393 |
| KIAA1539  | -0.44922 | 0.345018 | -1.82423 | 0.083197 | 0.157457 | -4.92418 |
| CHRNA2    | 0.258317 | 0.027291 | 1.823947 | 0.083241 | 0.157527 | -4.92464 |
| SLC9A3    | -0.4907  | 0.229717 | -1.82374 | 0.083274 | 0.157572 | -4.92497 |
| BIN1      | 0.658062 | -0.17273 | 1.823395 | 0.083328 | 0.15766  | -4.92552 |
| PLN       | -0.52308 | 0.019898 | -1.8233  | 0.083343 | 0.157673 | -4.92567 |
| CST9L     | -0.35994 | 0.067802 | -1.82324 | 0.083353 | 0.157677 | -4.92578 |
| SIRPB2    | -0.58855 | 0.382841 | -1.82289 | 0.083407 | 0.157763 | -4.92632 |
| FAM55B    | 0.610888 | -0.2808  | 1.662972 | 0.115944 | 0.203111 | -4.92658 |
| FKBP9     | -0.83437 | 0.386216 | -1.82271 | 0.083435 | 0.157786 | -4.92661 |
| CCBP2     | 0.339182 | -0.52888 | 1.822379 | 0.083488 | 0.157871 | -4.92715 |
| TMEM101   | -0.27592 | 0.097618 | -1.82215 | 0.083524 | 0.157925 | -4.92752 |
| RYBP      | 0.7077   | -0.94373 | 1.821776 | 0.083582 | 0.158019 | -4.92811 |
| SLC35B4   | -0.24099 | 0.27052  | -1.82172 | 0.083592 | 0.158022 | -4.92821 |
| C2orf18   | -0.26317 | 0.020102 | -1.82149 | 0.083627 | 0.158074 | -4.92857 |
| SNF8      | 0.297678 | -0.24692 | 1.821355 | 0.083648 | 0.158076 | -4.92878 |
| LOC100136 | 0.360378 | -0.18231 | 1.821337 | 0.083651 | 0.158076 | -4.92881 |
| POF1B     | 0.642063 | 0.003549 | 1.821327 | 0.083653 | 0.158076 | -4.92883 |
| SLC10A7   | -0.7083  | 0.174309 | -1.78432 | 0.092373 | 0.170477 | -4.92888 |
| ZNF575    | 0.469751 | -0.01581 | 1.821164 | 0.083679 | 0.15811  | -4.92909 |
| FGFR1OP   | -0.78701 | 0.013533 | -1.78389 | 0.092444 | 0.170507 | -4.92954 |
| MRPS18B   | 0.503604 | -0.20659 | 1.820751 | 0.083743 | 0.158217 | -4.92975 |
| CRYGB     | -0.38435 | -0.01933 | -1.82044 | 0.083792 | 0.158282 | -4.93024 |
| PLEKHN1   | 0.574038 | -0.22208 | 1.820097 | 0.083847 | 0.158366 | -4.93079 |
| CCDC136   | 0.560517 | 0.15045  | 1.75731  | 0.095988 | 0.175841 | -4.9311  |
| ARSF      | 0.342071 | -0.26866 | 1.819897 | 0.083878 | 0.15841  | -4.93111 |
| ASMT      | -0.60685 | 0.597565 | -1.79109 | 0.089338 | 0.166179 | -4.93185 |
| RXFP4     | 0.474321 | -0.26345 | 1.814287 | 0.08557  | 0.160754 | -4.933   |
| KCNIP3    | -0.65708 | 0.294157 | -1.81869 | 0.084069 | 0.158755 | -4.93304 |
| KIR3DL1   | 0.501006 | 0.268629 | 1.818562 | 0.084089 | 0.158756 | -4.93324 |
| AK5       | 1.037061 | -0.33936 | 1.818557 | 0.08409  | 0.158756 | -4.93325 |
| ACOT1     | 0.574716 | -0.23276 | 1.818438 | 0.084109 | 0.158756 | -4.93344 |
| MEPCE     | -0.47598 | 0.858796 | -1.8184  | 0.084115 | 0.158756 | -4.93351 |
| APCS      | 0.368088 | -0.35187 | 1.818378 | 0.084118 | 0.158756 | -4.93353 |
| MGC4580C  | -0.53826 | 0.320874 | -1.81761 | 0.084239 | 0.15897  | -4.93476 |
| CKAP5     | -0.44179 | 0.530742 | -1.8173  | 0.084289 | 0.159049 | -4.93526 |
| UBE2C     | 0.683543 | -0.16654 | 1.816998 | 0.084336 | 0.159122 | -4.93574 |
| CCDC168   | -0.30599 | -0.01061 | -1.81693 | 0.084348 | 0.159129 | -4.93585 |
| ANP32D    | 0.462194 | -0.28965 | 1.8165   | 0.084415 | 0.159241 | -4.93653 |
| BRAP      | -0.50329 | 0.865834 | -1.81629 | 0.084449 | 0.15929  | -4.93687 |
| ZNF626    | -0.34433 | -0.32205 | -1.8158  | 0.084527 | 0.15939  | -4.93765 |
| RUFY2     | -0.28136 | 0.163914 | -1.81564 | 0.084551 | 0.159421 | -4.9379  |
| RPS15A    | 0.447826 | -0.40358 | 1.815514 | 0.084572 | 0.159432 | -4.9381  |
| MSX2      | -0.37675 | 0.046729 | -1.81547 | 0.084579 | 0.159432 | -4.93817 |
| TMPRSS4   | 0.360052 | -0.14393 | 1.8154   | 0.08459  | 0.159432 | -4.93828 |
| DPP4      | 0.455323 | -0.28634 | 1.815321 | 0.084602 | 0.15944  | -4.93841 |

|           |          |          |          |          |          |          |
|-----------|----------|----------|----------|----------|----------|----------|
| MTBP      | 0.693411 | -0.00202 | 1.815132 | 0.084632 | 0.159481 | -4.93871 |
| CXCL3     | -0.48738 | 0.2846   | -1.81498 | 0.084657 | 0.159513 | -4.93896 |
| XRN1      | -0.69865 | 0.322122 | -1.81438 | 0.084752 | 0.159661 | -4.9399  |
| SLC25A26  | 0.503264 | -0.7382  | 1.814379 | 0.084752 | 0.159661 | -4.93991 |
| CEBPG     | -0.2902  | 0.095654 | -1.81431 | 0.084763 | 0.159666 | -4.94002 |
| CDKN1C    | 1.148621 | -0.28634 | 1.814087 | 0.084799 | 0.159718 | -4.94037 |
| DCAF17    | -0.72267 | 0.282249 | -1.80934 | 0.086362 | 0.161868 | -4.94083 |
| BAIAP2    | 0.441788 | 0.141218 | 1.813594 | 0.084877 | 0.159851 | -4.94116 |
| HNRNPUL2  | -0.4057  | 0.275688 | -1.81321 | 0.084939 | 0.159946 | -4.94177 |
| TSSK2     | -0.38284 | 0.140828 | -1.81317 | 0.084945 | 0.159946 | -4.94183 |
| MALT1     | -0.48803 | 0.050074 | -1.81306 | 0.084962 | 0.159963 | -4.942   |
| LATS2     | -0.72015 | 0.406871 | -1.81295 | 0.08498  | 0.159983 | -4.94219 |
| RENBP     | -0.4266  | 0.195811 | -1.81272 | 0.085017 | 0.160036 | -4.94255 |
| EXT2      | 0.280971 | -0.08242 | 1.81259  | 0.085037 | 0.16006  | -4.94276 |
| PLXNA2    | 0.410918 | 0.111484 | 1.811654 | 0.085187 | 0.160317 | -4.94425 |
| CDYL      | -0.77092 | 0.661215 | -1.81159 | 0.085197 | 0.160317 | -4.94435 |
| NUDT2     | -0.50764 | 0.161427 | -1.81158 | 0.085198 | 0.160317 | -4.94436 |
| CXCL10    | -1.09341 | 0.281078 | -1.8069  | 0.086754 | 0.162419 | -4.94468 |
| CLEC2B    | -1.13472 | 0.007833 | -1.81136 | 0.085234 | 0.160369 | -4.94472 |
| FKBP14    | -0.35461 | 0.356519 | -1.81124 | 0.085253 | 0.160376 | -4.9449  |
| HIST1H4E  | -0.4251  | 0.364625 | -1.81123 | 0.085254 | 0.160376 | -4.94492 |
| OLIG2     | 0.895082 | 0.030051 | 1.806733 | 0.086782 | 0.162454 | -4.94495 |
| MPPED1    | 0.552669 | -0.40557 | 1.810781 | 0.085326 | 0.160496 | -4.94564 |
| MAGOHB    | -0.28874 | 0.172367 | -1.81071 | 0.085338 | 0.160503 | -4.94575 |
| HAPLN3    | -0.56602 | 0.630007 | -1.81061 | 0.085354 | 0.160512 | -4.9459  |
| ADAM29    | 0.606258 | -0.6269  | 1.778068 | 0.092418 | 0.170498 | -4.94593 |
| ZNF800    | -0.67686 | 0.096601 | -1.81057 | 0.085361 | 0.160512 | -4.94598 |
| C1orf180  | 0.216981 | -0.06406 | 1.810523 | 0.085368 | 0.160512 | -4.94605 |
| GUSBP10   | -0.50303 | 0.003763 | -1.81028 | 0.085406 | 0.160569 | -4.94643 |
| SPARCL1   | -0.65741 | 0.248907 | -1.81014 | 0.085429 | 0.160581 | -4.94665 |
| C11orf88  | 0.349445 | -0.38189 | 1.810115 | 0.085433 | 0.160581 | -4.9467  |
| KIAA1875  | -0.39218 | 0.474935 | -1.80992 | 0.085465 | 0.160617 | -4.94701 |
| BRMS1L    | -0.71483 | 0.365137 | -1.80526 | 0.087019 | 0.162836 | -4.94727 |
| B3GNT4    | 0.368317 | -0.13482 | 1.809564 | 0.085521 | 0.160702 | -4.94757 |
| HLA-DQA1  | 3.044618 | -1.14754 | 1.809536 | 0.085526 | 0.160702 | -4.94762 |
| DNAAF1    | 0.774824 | 0.051977 | 1.809432 | 0.085543 | 0.160718 | -4.94778 |
| CCDC60    | 0.21029  | -0.01112 | 1.804575 | 0.087131 | 0.162982 | -4.94835 |
| ITPRIPL2  | -0.54175 | 0.259126 | -1.80878 | 0.085647 | 0.160883 | -4.94882 |
| OMP       | 0.30526  | -0.18845 | 1.808552 | 0.085684 | 0.160937 | -4.94918 |
| MICAL3    | -0.47251 | 0.615414 | -1.8082  | 0.085741 | 0.161013 | -4.94975 |
| OPN4      | 0.347418 | -0.29673 | 1.808096 | 0.085757 | 0.161028 | -4.94991 |
| LINC00094 | 0.431382 | -0.3418  | 1.807988 | 0.085774 | 0.161045 | -4.95008 |
| SPHAR     | -0.25874 | -0.02923 | -1.80791 | 0.085787 | 0.161052 | -4.9502  |
| MRPL47    | -0.73819 | -0.21441 | -1.80755 | 0.085844 | 0.161124 | -4.95077 |
| DPYD      | -0.86587 | 0.233722 | -1.80748 | 0.085856 | 0.161124 | -4.95088 |
| IFNAR1    | -0.5598  | -0.02009 | -1.80677 | 0.085971 | 0.161321 | -4.95202 |
| ANKRD7    | 0.33301  | -0.23082 | 1.806408 | 0.086029 | 0.161404 | -4.95259 |

|           |          |          |          |          |          |          |
|-----------|----------|----------|----------|----------|----------|----------|
| C10orf96  | -0.67733 | 0.408768 | -1.80639 | 0.086031 | 0.161404 | -4.95261 |
| SLC5A10   | 0.695991 | -0.2974  | 1.777572 | 0.0916   | 0.169337 | -4.95296 |
| ABCC1     | -0.47516 | 0.571003 | -1.80617 | 0.086068 | 0.161441 | -4.95297 |
| ARL6IP1   | -0.58101 | 0.028304 | -1.80579 | 0.086129 | 0.16154  | -4.95357 |
| NUP85     | -0.28281 | 0.162538 | -1.8057  | 0.086143 | 0.161552 | -4.95371 |
| APOBEC3G  | -0.77963 | 0.392291 | -1.80506 | 0.086246 | 0.161729 | -4.95472 |
| HIST1H2Bf | -0.54259 | 0.539517 | -1.80476 | 0.086295 | 0.161789 | -4.9552  |
| MIB2      | -0.32704 | 0.426593 | -1.80455 | 0.086329 | 0.161838 | -4.95553 |
| EPHX2     | 0.922901 | -0.31918 | 1.804419 | 0.08635  | 0.161862 | -4.95574 |
| CDC42EP2  | 0.553499 | 0.008421 | 1.804297 | 0.08637  | 0.161868 | -4.95594 |
| CASKIN2   | 0.514912 | -0.56305 | 1.803596 | 0.086483 | 0.162065 | -4.95705 |
| C7orf61   | -0.51701 | 0.635879 | -1.80339 | 0.086517 | 0.162113 | -4.95738 |
| SHH       | 0.307966 | -0.11316 | 1.803161 | 0.086554 | 0.162139 | -4.95774 |
| ALG13     | 0.393696 | -0.29796 | 1.802789 | 0.086614 | 0.162233 | -4.95833 |
| LOC100131 | 0.435893 | -0.28674 | 1.798068 | 0.08819  | 0.16457  | -4.95861 |
| HAVCR1    | 0.352155 | -0.29535 | 1.802561 | 0.086651 | 0.162286 | -4.95869 |
| KIR3DL3   | 0.462799 | -0.50018 | 1.699556 | 0.115255 | 0.202176 | -4.95871 |
| SAP18     | -0.17611 | -0.05615 | -1.80229 | 0.086696 | 0.162342 | -4.95913 |
| B3GNT5    | -0.69288 | 0.225596 | -1.80227 | 0.086697 | 0.162342 | -4.95914 |
| LMBRD2    | -0.48557 | 0.095    | -1.80192 | 0.086755 | 0.162419 | -4.95971 |
| LYZ       | -1.26804 | 0.993819 | -1.80142 | 0.086836 | 0.16254  | -4.9605  |
| IKZF4     | -0.65559 | 0.474245 | -1.80115 | 0.086879 | 0.162605 | -4.96092 |
| HMOX1     | 0.600812 | -0.54645 | 1.800847 | 0.08693  | 0.162684 | -4.96141 |
| CT45A1    | 0.342319 | -0.01804 | 1.795789 | 0.088563 | 0.165032 | -4.96219 |
| NOXRED1   | 0.614265 | -0.11187 | 1.799926 | 0.087079 | 0.162917 | -4.96287 |
| LOC100651 | -0.54413 | 0.995585 | -1.79987 | 0.087089 | 0.16292  | -4.96296 |
| C1orf116  | 0.624816 | -0.20603 | 1.799153 | 0.087205 | 0.163106 | -4.96409 |
| MAPKBP1   | -0.35267 | 0.358691 | -1.79909 | 0.087215 | 0.163109 | -4.96419 |
| STX17     | 0.261975 | -0.08314 | 1.798898 | 0.087247 | 0.163153 | -4.96449 |
| PPP1R1B   | 0.47504  | -0.18128 | 1.798799 | 0.087263 | 0.163168 | -4.96465 |
| PCDHGC4   | -0.65087 | 0.33479  | -1.79391 | 0.088873 | 0.165482 | -4.96515 |
| TPM2      | 0.669917 | -0.11485 | 1.798392 | 0.08733  | 0.163268 | -4.96529 |
| LOC100509 | 0.352377 | -0.16789 | 1.798369 | 0.087333 | 0.163268 | -4.96533 |
| NAV1      | -0.29499 | 0.058999 | -1.7983  | 0.087344 | 0.163272 | -4.96543 |
| PTH       | 0.496729 | -0.0913  | 1.793683 | 0.08891  | 0.165529 | -4.9655  |
| PPM1A     | -0.50303 | -0.18645 | -1.79813 | 0.087373 | 0.16331  | -4.96571 |
| VPS45     | -0.4467  | 0.506145 | -1.79805 | 0.087385 | 0.163318 | -4.96583 |
| AKAP4     | 0.763481 | -0.8883  | 1.787749 | 0.090792 | 0.168178 | -4.96621 |
| L1CAM     | 0.408398 | -0.15055 | 1.797564 | 0.087465 | 0.163451 | -4.9666  |
| PEX1      | -0.44913 | 0.014162 | -1.79747 | 0.08748  | 0.163452 | -4.96675 |
| KHSRP     | 0.332762 | -0.0564  | 1.797459 | 0.087482 | 0.163452 | -4.96677 |
| NSUN3     | -0.35244 | -0.17402 | -1.79664 | 0.087617 | 0.163688 | -4.96807 |
| BTN1A1    | -0.32188 | 0.135023 | -1.79649 | 0.087641 | 0.163717 | -4.9683  |
| NBPF11    | -0.34619 | 0.066753 | -1.79568 | 0.087773 | 0.163949 | -4.96958 |
| ZDHHC13   | -0.34462 | 0.043603 | -1.79543 | 0.087815 | 0.164011 | -4.96998 |
| C4orf26   | 0.253353 | -0.16225 | 1.795025 | 0.087881 | 0.164116 | -4.97062 |
| TUG1      | -0.42199 | 0.175315 | -1.79499 | 0.087888 | 0.164116 | -4.97068 |

|           |          |          |          |          |          |          |
|-----------|----------|----------|----------|----------|----------|----------|
| USP45     | -0.54255 | 0.058137 | -1.7902  | 0.089485 | 0.166347 | -4.97096 |
| COPB1     | -0.8267  | 0.442223 | -1.79473 | 0.087929 | 0.164178 | -4.97108 |
| HTR2C     | -0.75773 | 0.403577 | -1.79459 | 0.087953 | 0.164207 | -4.97131 |
| POU2AF1   | -0.62952 | 0.830866 | -1.79453 | 0.087962 | 0.164208 | -4.9714  |
| HEATR4    | -0.26073 | -0.01417 | -1.78981 | 0.089549 | 0.166438 | -4.97158 |
| GYS2      | -0.4303  | 0.046681 | -1.78926 | 0.089642 | 0.166551 | -4.97245 |
| TCEB3B    | -0.47431 | -0.09989 | -1.79362 | 0.088112 | 0.164472 | -4.97284 |
| OR12D2    | 0.322689 | -0.26965 | 1.793508 | 0.088131 | 0.164491 | -4.97302 |
| ADAM5P    | 0.578779 | -0.18012 | 1.793356 | 0.088155 | 0.164522 | -4.97326 |
| PTRHD1    | -0.40806 | -0.04206 | -1.7931  | 0.088198 | 0.16457  | -4.97366 |
| NCK1      | -0.34974 | 0.007841 | -1.79265 | 0.088271 | 0.164691 | -4.97437 |
| CS        | -0.81307 | 0.979083 | -1.79256 | 0.088287 | 0.164705 | -4.97452 |
| TAF1      | -0.61193 | 0.132401 | -1.79237 | 0.088318 | 0.164747 | -4.97481 |
| CYP20A1   | -0.66326 | 0.666769 | -1.79223 | 0.088341 | 0.164775 | -4.97504 |
| GNRHR2    | 0.665327 | -0.60115 | 1.61889  | 0.129713 | 0.221182 | -4.97524 |
| PCP4L1    | 0.332944 | -0.21746 | 1.7921   | 0.088363 | 0.164799 | -4.97524 |
| CDK5R1    | -0.15802 | 0.012756 | -1.79204 | 0.088373 | 0.164803 | -4.97534 |
| KTI12     | 0.787188 | 0.081319 | 1.787112 | 0.089999 | 0.167059 | -4.97582 |
| SLC25A22  | -0.7695  | 0.727949 | -1.79149 | 0.088464 | 0.164956 | -4.97621 |
| TIMM17A   | -0.38281 | 0.105695 | -1.79137 | 0.088483 | 0.164975 | -4.97639 |
| KCNA4     | -0.50253 | -0.08863 | -1.79117 | 0.088516 | 0.164976 | -4.97671 |
| GFRA1     | -0.31179 | -0.00676 | -1.79117 | 0.088517 | 0.164976 | -4.97671 |
| FBP2      | 0.506079 | -0.00033 | 1.791028 | 0.08854  | 0.165003 | -4.97693 |
| RPS7P5    | -0.97849 | -0.18659 | -1.70682 | 0.11014  | 0.195161 | -4.97697 |
| RECK      | 0.583335 | -0.64283 | 1.790319 | 0.088657 | 0.165178 | -4.97805 |
| YBX2      | 0.315853 | -0.28676 | 1.790308 | 0.088659 | 0.165178 | -4.97807 |
| DKFZP586f | 0.86974  | -1.19805 | 1.537373 | 0.152798 | 0.251481 | -4.9781  |
| AGXT2     | -0.15627 | 0.022958 | -1.78989 | 0.088728 | 0.165281 | -4.97873 |
| ZNF362    | 0.309507 | -0.08376 | 1.789873 | 0.088731 | 0.165281 | -4.97876 |
| FSTL5     | -0.25389 | -0.08748 | -1.78966 | 0.088766 | 0.165331 | -4.97909 |
| KLHL24    | -0.491   | 0.119051 | -1.78954 | 0.088787 | 0.165353 | -4.97929 |
| SUCLG2    | 0.345967 | -0.5828  | 1.789181 | 0.088845 | 0.165447 | -4.97985 |
| FBXO4     | -0.65398 | 0.197431 | -1.7789  | 0.092277 | 0.17038  | -4.97998 |
| OR5F1     | -0.40222 | 0.005666 | -1.78876 | 0.088915 | 0.165529 | -4.98051 |
| GAFA1     | 0.433072 | -0.34706 | 1.763442 | 0.097072 | 0.177279 | -4.98054 |
| KRAS      | -0.78264 | 0.789284 | -1.78824 | 0.089002 | 0.165675 | -4.98133 |
| NDOR1     | 0.266337 | -0.16034 | 1.787708 | 0.08909  | 0.165824 | -4.98217 |
| TK1       | -0.5768  | 0.622703 | -1.78761 | 0.089106 | 0.165838 | -4.98232 |
| ATG4C     | -0.416   | 0.210505 | -1.78753 | 0.08912  | 0.165848 | -4.98245 |
| PERP      | 0.623536 | -0.38901 | 1.601262 | 0.137969 | 0.231989 | -4.98319 |
| LEFTY1    | 0.8589   | -0.13555 | 1.786934 | 0.089219 | 0.166008 | -4.98339 |
| CPEB4     | -0.75092 | 0.595716 | -1.78691 | 0.089223 | 0.166008 | -4.98343 |
| CLK1      | -0.90407 | 0.521855 | -1.78666 | 0.089265 | 0.16607  | -4.98383 |
| C14orf56  | 0.623602 | -0.32532 | 1.59181  | 0.142929 | 0.238588 | -4.98387 |
| CSN1S2AP  | 0.493434 | -0.53472 | 1.742257 | 0.100811 | 0.18251  | -4.98389 |
| RNF8      | -0.30628 | 0.323652 | -1.7862  | 0.08934  | 0.166179 | -4.98454 |
| SYCE1     | 0.56355  | -0.37682 | 1.757143 | 0.095111 | 0.174545 | -4.98465 |

|           |          |          |          |          |          |          |
|-----------|----------|----------|----------|----------|----------|----------|
| DLEU7     | 0.390918 | -0.05547 | 1.785924 | 0.089387 | 0.16625  | -4.98498 |
| CBX1      | -0.43584 | 0.612328 | -1.78587 | 0.089396 | 0.166251 | -4.98507 |
| TMX4      | -0.48837 | 0.292127 | -1.78565 | 0.089432 | 0.166303 | -4.98541 |
| PLCH2     | 0.509366 | 0.028655 | 1.785351 | 0.089482 | 0.166347 | -4.98588 |
| MYL6      | -0.51356 | 0.052747 | -1.78531 | 0.089489 | 0.166347 | -4.98595 |
| KCTD1     | 0.359089 | -0.33213 | 1.785306 | 0.08949  | 0.166347 | -4.98595 |
| ANP32B    | -0.30959 | 0.206649 | -1.78491 | 0.089556 | 0.166438 | -4.98658 |
| AKTIP     | -0.41536 | 0.126457 | -1.78468 | 0.089594 | 0.166477 | -4.98693 |
| OR11G2    | 0.449632 | -0.43285 | 1.78399  | 0.08971  | 0.166661 | -4.98803 |
| RPN1      | -0.28466 | 0.077929 | -1.78385 | 0.089733 | 0.166681 | -4.98825 |
| APOA1BP   | 0.477985 | -0.13256 | 1.783823 | 0.089738 | 0.166681 | -4.98829 |
| LANCL2    | -0.40266 | 0.425774 | -1.78347 | 0.089797 | 0.166775 | -4.98885 |
| DSP       | 1.030474 | -0.26031 | 1.668267 | 0.116184 | 0.203404 | -4.98916 |
| RFPL2     | 0.559683 | -0.46382 | 1.766125 | 0.095469 | 0.175118 | -4.98924 |
| RGL1      | 0.479486 | -0.68817 | 1.78285  | 0.0899   | 0.166952 | -4.98982 |
| GPR155    | -0.55267 | 0.208928 | -1.78247 | 0.089964 | 0.167054 | -4.99042 |
| KRT8      | 0.454976 | -0.22303 | 1.782325 | 0.089988 | 0.167059 | -4.99064 |
| FAM76A    | -0.65049 | 0.507965 | -1.78224 | 0.090003 | 0.167059 | -4.99078 |
| STAG3     | -0.345   | 0.242909 | -1.7822  | 0.090009 | 0.167059 | -4.99084 |
| NFX1      | -0.24671 | 0.191399 | -1.78202 | 0.09004  | 0.1671   | -4.99113 |
| CEACAM7   | -0.42569 | 0.158937 | -1.78186 | 0.090066 | 0.167133 | -4.99138 |
| THOC2     | -0.40179 | 0.117815 | -1.78158 | 0.090113 | 0.167204 | -4.99181 |
| NUP88     | -0.44393 | 0.488788 | -1.77647 | 0.091786 | 0.169627 | -4.99245 |
| COMP      | 0.494795 | -0.30987 | 1.776441 | 0.091791 | 0.169627 | -4.9925  |
| EXD3      | 0.419756 | 0.147506 | 1.780796 | 0.090245 | 0.167433 | -4.99305 |
| SERPINF1  | 0.691107 | -0.18621 | 1.780394 | 0.090313 | 0.167542 | -4.99368 |
| LMOD2     | 0.329002 | -0.10346 | 1.780344 | 0.090321 | 0.167542 | -4.99376 |
| TMC5      | -0.90223 | 0.240054 | -1.66892 | 0.114745 | 0.201552 | -4.99392 |
| LSM1      | -0.49194 | -0.1229  | -1.78005 | 0.090371 | 0.167619 | -4.99423 |
| LOC100506 | 0.388057 | -0.25818 | 1.779629 | 0.090441 | 0.167734 | -4.99488 |
| C1orf168  | 0.537972 | -0.04646 | 1.779461 | 0.090469 | 0.16777  | -4.99515 |
| PREPL     | -0.5492  | 0.17074  | -1.77941 | 0.090478 | 0.16777  | -4.99523 |
| ANKRD36B  | 0.55055  | -0.3253  | 1.750246 | 0.096323 | 0.17624  | -4.99529 |
| SLC22A5   | -0.50525 | 0.423211 | -1.77924 | 0.090507 | 0.167783 | -4.9955  |
| C14orf80  | 0.303278 | -0.00402 | 1.779216 | 0.090511 | 0.167783 | -4.99553 |
| PCF11     | -0.45758 | 0.385165 | -1.77914 | 0.090524 | 0.167783 | -4.99566 |
| UBE2L3    | -0.39223 | 0.308374 | -1.77911 | 0.090528 | 0.167783 | -4.99569 |
| GLB1      | -0.3438  | 0.368762 | -1.77884 | 0.090575 | 0.167854 | -4.99613 |
| METTL17   | -0.23413 | 0.016891 | -1.7784  | 0.090648 | 0.167974 | -4.99681 |
| TMEM9     | 0.322268 | -0.17095 | 1.778143 | 0.090692 | 0.168039 | -4.99722 |
| ERCC4     | -0.47049 | 0.043973 | -1.77808 | 0.090702 | 0.168042 | -4.99731 |
| VIM       | -0.51491 | 0.43058  | -1.77738 | 0.09082  | 0.168214 | -4.99841 |
| CITED4    | -0.48808 | 0.888843 | -1.77733 | 0.09083  | 0.168215 | -4.9985  |
| KLHL28    | 0.305725 | -0.57105 | 1.777258 | 0.090841 | 0.168221 | -4.99861 |
| LOC145837 | -0.343   | -0.18788 | -1.77247 | 0.092466 | 0.170518 | -4.9987  |
| UGDH      | -1.0671  | 0.628083 | -1.77698 | 0.090889 | 0.168293 | -4.99905 |
| F2RL1     | -1.23417 | 1.039538 | -1.77629 | 0.091005 | 0.16849  | -5.00013 |

|           |          |          |          |          |          |          |
|-----------|----------|----------|----------|----------|----------|----------|
| LOC10065: | 0.401046 | -0.21005 | 1.776053 | 0.091045 | 0.168534 | -5.0005  |
| LOC10012: | 0.726171 | -0.19244 | 1.77111  | 0.092698 | 0.170884 | -5.00081 |
| DHCR7     | -0.65232 | 0.189448 | -1.77577 | 0.091093 | 0.168607 | -5.00094 |
| ANPEP     | -0.72451 | 0.695659 | -1.77563 | 0.091116 | 0.168634 | -5.00116 |
| CCL16     | 0.395048 | -0.57764 | 1.741987 | 0.0987   | 0.179575 | -5.00141 |
| TTC9      | -0.17465 | 0.034931 | -1.77545 | 0.091147 | 0.168676 | -5.00144 |
| TMEM128   | -0.58538 | -0.17067 | -1.73657 | 0.100691 | 0.18236  | -5.00184 |
| WDR77     | 0.374538 | -0.26191 | 1.775158 | 0.091197 | 0.168751 | -5.0019  |
| MAN2A2    | -0.47634 | 0.337113 | -1.77493 | 0.091235 | 0.168792 | -5.00225 |
| GVINP1    | -0.55122 | 0.255059 | -1.77488 | 0.091244 | 0.168792 | -5.00234 |
| HKR1      | -0.30575 | 0.371603 | -1.77471 | 0.091272 | 0.168827 | -5.0026  |
| HOXB4     | -0.26806 | 0.222436 | -1.77462 | 0.091288 | 0.168841 | -5.00275 |
| NAA38     | -0.83004 | 0.22931  | -1.76403 | 0.094819 | 0.17409  | -5.00299 |
| MRC2      | 0.525376 | -0.05166 | 1.774248 | 0.091351 | 0.168941 | -5.00333 |
| THRSP     | -0.53613 | 0.260844 | -1.7484  | 0.099714 | 0.180891 | -5.00337 |
| LOC33980: | -0.72744 | 0.247073 | -1.77401 | 0.091391 | 0.168999 | -5.00369 |
| SERPINA7  | 0.431102 | -0.1774  | 1.773525 | 0.091474 | 0.169137 | -5.00446 |
| PLCL2     | -0.54633 | 0.554687 | -1.77345 | 0.091486 | 0.169144 | -5.00458 |
| GJB4      | -0.35041 | 0.000588 | -1.76803 | 0.093225 | 0.171743 | -5.0056  |
| C9orf4    | -0.36423 | 0.017957 | -1.73882 | 0.099269 | 0.180316 | -5.00624 |
| C17orf69  | 0.29707  | -0.21229 | 1.77227  | 0.091688 | 0.169484 | -5.00643 |
| IGLL1     | -0.6512  | 1.172764 | -1.7717  | 0.091785 | 0.169627 | -5.00732 |
| SLC25A4   | 0.472524 | -0.15881 | 1.771293 | 0.091854 | 0.169727 | -5.00796 |
| PGPEP1    | -0.33793 | 0.021342 | -1.77123 | 0.091866 | 0.169733 | -5.00806 |
| MMS22L    | -0.48624 | 0.088461 | -1.77109 | 0.091888 | 0.169749 | -5.00827 |
| MTCP1NB   | -0.33906 | 0.014869 | -1.77107 | 0.091892 | 0.169749 | -5.0083  |
| TMEM50B   | -0.63734 | -0.2685  | -1.76982 | 0.092105 | 0.170127 | -5.01026 |
| C15orf62  | 0.337307 | 0.038617 | 1.769716 | 0.092124 | 0.170145 | -5.01043 |
| PCDHGA2   | 0.406274 | -0.42949 | 1.768998 | 0.092247 | 0.170356 | -5.01155 |
| LOC10013: | 0.440426 | -0.36769 | 1.76418  | 0.093889 | 0.172738 | -5.01159 |
| FMNL1     | -0.47382 | 0.703084 | -1.76888 | 0.092266 | 0.170376 | -5.01173 |
| LINC00256 | -0.68797 | 0.434771 | -1.76854 | 0.092324 | 0.170451 | -5.01226 |
| RAMP2     | 0.271978 | -0.09186 | 1.768469 | 0.092337 | 0.170455 | -5.01238 |
| TSPAN13   | -0.46876 | 0.129703 | -1.76838 | 0.092352 | 0.170455 | -5.01251 |
| KCNC4     | 0.365051 | -0.17743 | 1.768381 | 0.092352 | 0.170455 | -5.01251 |
| OSR1      | -0.3538  | 0.077991 | -1.76337 | 0.094028 | 0.172929 | -5.01284 |
| LOC10050: | -0.26901 | 0.086676 | -1.76815 | 0.092391 | 0.170495 | -5.01287 |
| FBXO45    | -0.56474 | 0.101503 | -1.75747 | 0.095961 | 0.175816 | -5.01311 |
| ZNRD1     | -0.27261 | 0.025825 | -1.768   | 0.092418 | 0.170498 | -5.01312 |
| TNFRSF12A | -0.48823 | 0.340195 | -1.76797 | 0.092422 | 0.170498 | -5.01315 |
| PDE7A     | -0.65393 | 0.254717 | -1.76794 | 0.092428 | 0.170498 | -5.0132  |
| SCML1     | -0.71379 | 0.363053 | -1.76781 | 0.09245  | 0.170507 | -5.01341 |
| ZNF514    | -0.47185 | 0.404388 | -1.76767 | 0.092474 | 0.170518 | -5.01362 |
| SECISBP2L | -0.32624 | 0.182289 | -1.76751 | 0.092501 | 0.170544 | -5.01387 |
| DGCR14    | -0.22569 | 0.293462 | -1.76749 | 0.092505 | 0.170544 | -5.01391 |
| RALYL     | 0.503262 | -0.259   | 1.736906 | 0.098705 | 0.179575 | -5.01579 |
| PAIP2     | -0.44519 | -0.1177  | -1.76439 | 0.093038 | 0.171479 | -5.01875 |

|           |          |          |          |          |          |          |
|-----------|----------|----------|----------|----------|----------|----------|
| ATG4B     | -0.63215 | 0.603447 | -1.76406 | 0.093095 | 0.171561 | -5.01926 |
| BIRC7     | 0.231653 | -0.08112 | 1.764031 | 0.093101 | 0.171561 | -5.01931 |
| A1BG      | 0.510651 | -0.44548 | 1.763774 | 0.093145 | 0.171627 | -5.01971 |
| SVIL      | -0.62565 | 0.294037 | -1.7635  | 0.093192 | 0.171698 | -5.02014 |
| PACS2     | -0.43201 | 0.650845 | -1.76319 | 0.093246 | 0.171764 | -5.02062 |
| LCLAT1    | -0.47191 | -0.03505 | -1.76304 | 0.093271 | 0.171795 | -5.02085 |
| C3orf33   | 0.75278  | -0.42482 | 1.733452 | 0.099329 | 0.180409 | -5.02108 |
| GABBR2    | 0.570338 | -0.42037 | 1.733381 | 0.099342 | 0.180409 | -5.02119 |
| PFDN6     | 0.361259 | -0.15721 | 1.762811 | 0.093311 | 0.171853 | -5.02122 |
| MIR155HG  | -0.48078 | 0.178806 | -1.72889 | 0.101072 | 0.182829 | -5.02136 |
| TBC1D22B  | -0.29718 | 0.362404 | -1.76247 | 0.09337  | 0.171945 | -5.02175 |
| LOC100651 | 1.558001 | -0.80477 | 1.73262  | 0.09948  | 0.180584 | -5.02235 |
| SLC38A6   | -0.48396 | -0.16015 | -1.73256 | 0.099492 | 0.180587 | -5.02244 |
| RFT1      | -0.48876 | 0.315476 | -1.7617  | 0.093504 | 0.172175 | -5.02295 |
| LMLN      | 0.468247 | -0.05422 | 1.761595 | 0.093522 | 0.172192 | -5.02311 |
| MRPS11    | -0.47455 | 0.281931 | -1.7606  | 0.093695 | 0.172478 | -5.02467 |
| GPRIN2    | 0.406826 | -0.51478 | 1.760459 | 0.093719 | 0.172506 | -5.02488 |
| PRKAB2    | -0.32839 | 0.332109 | -1.76019 | 0.093766 | 0.172561 | -5.02531 |
| ZNRF2     | -0.50821 | 0.235676 | -1.7495  | 0.097363 | 0.177706 | -5.02536 |
| PDE1C     | 0.701323 | -0.47437 | 1.749463 | 0.097369 | 0.177706 | -5.02542 |
| TRIM40    | 0.761722 | -0.28267 | 1.589869 | 0.132902 | 0.225365 | -5.02595 |
| ATP6V1E2  | -0.46625 | 0.414936 | -1.75957 | 0.093873 | 0.172729 | -5.02626 |
| GRAP      | -0.65575 | 0.912911 | -1.75956 | 0.093875 | 0.172729 | -5.02629 |
| SRXN1     | 0.664602 | -0.19596 | 1.759242 | 0.093931 | 0.172798 | -5.02678 |
| C9orf114  | -0.34163 | 0.493674 | -1.75917 | 0.093943 | 0.172805 | -5.02689 |
| ZNF678    | 0.459571 | -0.317   | 1.759017 | 0.09397  | 0.172838 | -5.02713 |
| FARSA     | 0.346136 | 0.100869 | 1.758568 | 0.094048 | 0.172949 | -5.02783 |
| SSX4B     | -0.74192 | -0.01565 | -1.74782 | 0.09766  | 0.178137 | -5.02794 |
| GTF3C4    | -0.32708 | 0.331535 | -1.75847 | 0.094065 | 0.172964 | -5.02798 |
| CMTM5     | 0.655659 | -0.14911 | 1.757902 | 0.094164 | 0.17313  | -5.02887 |
| ACTN1     | -0.51383 | 0.865318 | -1.75762 | 0.094213 | 0.173205 | -5.02931 |
| LOC100121 | -0.58588 | 0.226656 | -1.75227 | 0.095966 | 0.175816 | -5.03004 |
| TMEM186   | -0.28272 | 0.164223 | -1.75681 | 0.094355 | 0.173449 | -5.03057 |
| WDR64     | -0.57389 | 0.161407 | -1.75177 | 0.096054 | 0.175945 | -5.03081 |
| MGLL      | 0.729165 | -0.14787 | 1.756504 | 0.094408 | 0.17353  | -5.03104 |
| C2orf29   | -0.3013  | 0.057713 | -1.75608 | 0.094482 | 0.17365  | -5.03171 |
| PIK3C2B   | 0.610356 | -0.26932 | 1.75578  | 0.094534 | 0.17373  | -5.03217 |
| KRT40     | 0.187787 | -0.03953 | 1.750707 | 0.096242 | 0.17614  | -5.03246 |
| RAB30     | -0.56764 | 0.630804 | -1.75524 | 0.094629 | 0.173887 | -5.03301 |
| RGS6      | 0.317335 | 0.028033 | 1.755109 | 0.094652 | 0.173913 | -5.03321 |
| TRIM42    | 0.263977 | -0.20438 | 1.754988 | 0.094673 | 0.173936 | -5.0334  |
| TET2      | -0.79377 | 0.133911 | -1.75492 | 0.094685 | 0.173942 | -5.03351 |
| SYCP2     | -0.2016  | 0.040321 | -1.75485 | 0.094697 | 0.173947 | -5.03361 |
| GATA4     | 0.403253 | -0.22867 | 1.754738 | 0.094717 | 0.173967 | -5.03379 |
| HSPG2     | 0.260923 | -0.01149 | 1.754304 | 0.094793 | 0.174085 | -5.03447 |
| ABHD16B   | 0.225993 | -0.23305 | 1.754271 | 0.094799 | 0.174085 | -5.03452 |
| AKR7A2    | 0.448025 | 0.018814 | 1.754172 | 0.094816 | 0.17409  | -5.03467 |



|           |          |          |          |          |          |          |
|-----------|----------|----------|----------|----------|----------|----------|
| CLTA      | -0.17684 | 0.021845 | -1.75363 | 0.094911 | 0.174233 | -5.03551 |
| ALDH16A1  | 0.406757 | 0.107509 | 1.753609 | 0.094915 | 0.174233 | -5.03555 |
| HIAT1     | -0.81579 | 0.701404 | -1.75332 | 0.094965 | 0.174309 | -5.03599 |
| C17orf103 | 0.546799 | -0.30964 | 1.75273  | 0.095069 | 0.174484 | -5.03691 |
| CA12      | 0.446488 | -0.12703 | 1.741406 | 0.098805 | 0.179706 | -5.03776 |
| LOC28424  | 0.220226 | -0.03224 | 1.752003 | 0.095197 | 0.174686 | -5.03804 |
| MMP1      | 0.589957 | -0.45673 | 1.751337 | 0.095314 | 0.174884 | -5.03908 |
| FRA10AC1  | -0.353   | 0.068875 | -1.7461  | 0.097057 | 0.177269 | -5.03956 |
| CLDN16    | -0.35668 | 0.102503 | -1.75069 | 0.095428 | 0.175077 | -5.04008 |
| CLCN4     | 0.363453 | -0.2148  | 1.750566 | 0.09545  | 0.175101 | -5.04027 |
| TUBA4A    | -0.39275 | 0.571061 | -1.75032 | 0.095494 | 0.175148 | -5.04066 |
| SH3BP4    | -0.29038 | 0.270035 | -1.75022 | 0.095512 | 0.175165 | -5.04082 |
| APOL1     | -0.95678 | 0.674891 | -1.75012 | 0.095529 | 0.175179 | -5.04096 |
| GJA5      | -0.4529  | -0.1114  | -1.72038 | 0.101724 | 0.183738 | -5.04102 |
| C16orf62  | -0.31521 | 0.243952 | -1.74942 | 0.095653 | 0.175374 | -5.04205 |
| EIF5A2    | -0.39273 | 0.137487 | -1.7493  | 0.095673 | 0.175395 | -5.04223 |
| ERAL1     | 0.333068 | 0.0396   | 1.748976 | 0.095731 | 0.175484 | -5.04274 |
| TERF2IP   | 0.247926 | -0.1073  | 1.748928 | 0.09574  | 0.175484 | -5.04282 |
| INSRR     | 0.330182 | -0.1223  | 1.714578 | 0.103717 | 0.186564 | -5.04303 |
| SIRT6     | 0.249568 | -0.26343 | 1.748651 | 0.095789 | 0.175557 | -5.04325 |
| FAM9C     | -0.80444 | 0.419843 | -1.74792 | 0.095918 | 0.175778 | -5.04438 |
| RNF213    | -0.75837 | 0.793225 | -1.74776 | 0.095946 | 0.175813 | -5.04462 |
| PAIP1     | -0.5088  | -0.17133 | -1.71799 | 0.102168 | 0.184404 | -5.04466 |
| DRAP1     | -0.28217 | 0.055755 | -1.74688 | 0.096103 | 0.176009 | -5.046   |
| ZC3H18    | -0.51296 | 0.631061 | -1.74684 | 0.096109 | 0.176009 | -5.04605 |
| CRNKL1    | -0.65862 | 0.498681 | -1.7468  | 0.096116 | 0.176009 | -5.04611 |
| KIF3A     | -0.43275 | 0.301791 | -1.74636 | 0.096194 | 0.176136 | -5.04679 |
| CMC1      | -0.42228 | 0.160985 | -1.74629 | 0.096207 | 0.17614  | -5.0469  |
| RPL41     | 1.078615 | -1.32718 | 1.746237 | 0.096217 | 0.17614  | -5.04699 |
| HECW1     | 0.568062 | -0.47502 | 1.716401 | 0.102464 | 0.184801 | -5.04707 |
| RALA      | -0.41638 | 0.088339 | -1.74614 | 0.096234 | 0.17614  | -5.04714 |
| PAPSS2    | 0.602182 | 0.248843 | 1.746129 | 0.096236 | 0.17614  | -5.04716 |
| DHX37     | 0.318853 | -0.07339 | 1.746041 | 0.096251 | 0.176142 | -5.04729 |
| CHSY1     | -0.5947  | 0.066937 | -1.74587 | 0.096281 | 0.17618  | -5.04755 |
| LOC100501 | -0.37839 | -0.22839 | -1.74082 | 0.098001 | 0.178593 | -5.0477  |
| BPIFB3    | -0.26665 | 0.074805 | -1.74447 | 0.096531 | 0.176604 | -5.04973 |
| SMAP1     | -0.46588 | 0.175844 | -1.74433 | 0.096555 | 0.176631 | -5.04994 |
| TRADD     | 0.256089 | -0.19705 | 1.744115 | 0.096594 | 0.176686 | -5.05027 |
| SYS1      | -0.27718 | 0.220558 | -1.74382 | 0.096647 | 0.17676  | -5.05074 |
| SUV39H1   | 0.282768 | 0.04879  | 1.743783 | 0.096653 | 0.17676  | -5.05079 |
| CIB2      | 0.23943  | -0.14501 | 1.743738 | 0.096661 | 0.17676  | -5.05086 |
| VTCN1     | -0.5578  | 0.086104 | -1.74349 | 0.096705 | 0.176824 | -5.05124 |
| LRRK2     | -0.83592 | 0.354906 | -1.74319 | 0.096759 | 0.176906 | -5.05171 |
| MCCC2     | -0.52048 | 0.488733 | -1.74301 | 0.096792 | 0.176949 | -5.05199 |
| C17orf76  | -0.41779 | 0.17146  | -1.74295 | 0.096802 | 0.176951 | -5.05208 |
| C10orf81  | 0.514553 | 0.072112 | 1.742853 | 0.096819 | 0.176966 | -5.05223 |
| RPS4Y1    | -2.54414 | -0.31499 | -1.59277 | 0.139865 | 0.234592 | -5.05229 |

|           |          |          |          |          |          |          |
|-----------|----------|----------|----------|----------|----------|----------|
| ZG16B     | 0.619097 | -0.30121 | 1.742484 | 0.096885 | 0.17707  | -5.0528  |
| DEFA6     | -0.26763 | 0.176217 | -1.73747 | 0.098603 | 0.179439 | -5.05284 |
| LOC642855 | -0.38461 | 0.229876 | -1.74242 | 0.096897 | 0.177074 | -5.0529  |
| PRMT5     | -0.42766 | 0.520302 | -1.74222 | 0.096933 | 0.177124 | -5.05321 |
| C6orf58   | 0.549292 | -0.07405 | 1.742082 | 0.096957 | 0.177152 | -5.05342 |
| COX8A     | -0.36306 | 0.182196 | -1.74194 | 0.096983 | 0.177173 | -5.05365 |
| TRIO      | -0.41377 | 0.67018  | -1.74191 | 0.096988 | 0.177173 | -5.05369 |
| C7orf34   | 0.6207   | 0.183573 | 1.741864 | 0.096996 | 0.177173 | -5.05376 |
| OBP2A     | 0.306884 | -0.29151 | 1.741098 | 0.097133 | 0.177374 | -5.05494 |
| MRPL15    | -0.56688 | 0.089302 | -1.74102 | 0.097146 | 0.177382 | -5.05506 |
| ERAP1     | 0.517087 | 0.128265 | 1.740506 | 0.097239 | 0.177535 | -5.05586 |
| DBIL5P    | 0.489098 | -0.05316 | 1.735395 | 0.098978 | 0.179904 | -5.05603 |
| TADA2B    | -0.50644 | 0.296856 | -1.74011 | 0.097309 | 0.177637 | -5.05647 |
| ACOT2     | 0.565179 | -0.18632 | 1.740092 | 0.097313 | 0.177637 | -5.0565  |
| MIP       | 0.299775 | -0.37262 | 1.709743 | 0.103711 | 0.186564 | -5.05717 |
| ITIH1     | 0.370334 | -0.10823 | 1.739562 | 0.097408 | 0.177761 | -5.05732 |
| IL12RB1   | -0.40834 | 0.327835 | -1.7393  | 0.097456 | 0.177831 | -5.05773 |
| NUDT7     | -0.7812  | 0.317948 | -1.69917 | 0.107656 | 0.191783 | -5.05804 |
| NUDC      | 0.270817 | -0.00096 | 1.738913 | 0.097525 | 0.177941 | -5.05832 |
| DTX2      | -0.38521 | 0.343545 | -1.73843 | 0.097612 | 0.178083 | -5.05907 |
| XRCC5     | -0.62393 | 0.481743 | -1.73333 | 0.099352 | 0.180409 | -5.0592  |
| UBE2S     | -0.36482 | 0.419026 | -1.73824 | 0.097645 | 0.178127 | -5.05935 |
| PHF5A     | -0.7054  | 0.287649 | -1.73786 | 0.097714 | 0.178219 | -5.05994 |
| LAMB4     | 0.445238 | 0.009095 | 1.737808 | 0.097724 | 0.17822  | -5.06003 |
| FAM163A   | 0.628869 | -0.2496  | 1.70757  | 0.104121 | 0.187101 | -5.06046 |
| LOC728543 | 0.328263 | -0.06565 | 1.737396 | 0.097798 | 0.178322 | -5.06066 |
| LOC646976 | 0.647271 | -0.1232  | 1.737396 | 0.097798 | 0.178322 | -5.06066 |
| TTC16     | 0.70121  | -0.4081  | 1.73721  | 0.097831 | 0.178367 | -5.06095 |
| COBLL1    | -0.55514 | 0.158561 | -1.73709 | 0.097854 | 0.178391 | -5.06114 |
| GIGYF1    | -0.42022 | 0.462816 | -1.73694 | 0.09788  | 0.178422 | -5.06137 |
| MYCBPAP   | 0.522661 | 0.047563 | 1.736869 | 0.097893 | 0.178429 | -5.06148 |
| CENPC1    | -0.40098 | 0.216226 | -1.73632 | 0.097992 | 0.178593 | -5.06232 |
| DDX25     | 0.576413 | -0.58413 | 1.701586 | 0.106171 | 0.189844 | -5.06259 |
| CASP8AP2  | -0.65583 | -0.05639 | -1.70574 | 0.104467 | 0.187533 | -5.06323 |
| ABRA      | -0.58965 | 0.134693 | -1.73064 | 0.09984  | 0.181068 | -5.06331 |
| TMEM187   | 0.480481 | -0.1352  | 1.735668 | 0.09811  | 0.178774 | -5.06333 |
| C2orf63   | 0.521825 | -0.05059 | 1.735522 | 0.098136 | 0.178798 | -5.06356 |
| STX5      | 0.238761 | -0.07135 | 1.735493 | 0.098141 | 0.178798 | -5.0636  |
| ZNF551    | -0.59189 | 0.562678 | -1.73536 | 0.098164 | 0.178824 | -5.0638  |
| FRMD6     | -0.51227 | 0.149849 | -1.73526 | 0.098183 | 0.178831 | -5.06396 |
| SLC30A5   | -0.39937 | -0.06626 | -1.73524 | 0.098186 | 0.178831 | -5.06399 |
| FUT11     | 0.193837 | -0.24212 | 1.734845 | 0.098258 | 0.17893  | -5.0646  |
| DERL3     | -0.54537 | 0.615527 | -1.73484 | 0.098259 | 0.17893  | -5.06461 |
| NDRG3     | -0.58459 | 0.164577 | -1.72939 | 0.100068 | 0.181365 | -5.06523 |
| CSH2      | -0.35451 | 0.243523 | -1.7343  | 0.098356 | 0.179091 | -5.06544 |
| TOMM20L   | 0.332087 | -0.24976 | 1.734192 | 0.098376 | 0.179111 | -5.06561 |
| CHID1     | 0.321656 | -0.01487 | 1.733769 | 0.098453 | 0.179215 | -5.06626 |

|           |          |          |          |          |          |          |
|-----------|----------|----------|----------|----------|----------|----------|
| CENPI     | -0.47455 | 0.042665 | -1.73376 | 0.098455 | 0.179215 | -5.06628 |
| RNF111    | -0.52306 | -0.04111 | -1.73372 | 0.098461 | 0.179215 | -5.06633 |
| SLCO4C1   | -0.73454 | 0.638886 | -1.72811 | 0.100302 | 0.181721 | -5.06719 |
| ZFP1      | 0.401634 | -0.02016 | 1.72198  | 0.102341 | 0.184648 | -5.06736 |
| DAZAP2    | 0.283975 | -0.42535 | 1.732987 | 0.098595 | 0.179439 | -5.06746 |
| PSME1     | -0.42471 | 0.421776 | -1.73267 | 0.098653 | 0.179513 | -5.06796 |
| OR6K2     | 0.419826 | -0.27134 | 1.732319 | 0.098716 | 0.179579 | -5.06849 |
| LOC72843: | -0.37463 | 0.15724  | -1.73195 | 0.098782 | 0.179682 | -5.06906 |
| NMBR      | 0.701228 | -0.46917 | 1.720713 | 0.102576 | 0.184935 | -5.06929 |
| KNG1      | -0.38084 | -0.01432 | -1.73155 | 0.098856 | 0.179784 | -5.06968 |
| ZNF668    | 0.284842 | -0.0241  | 1.731369 | 0.098889 | 0.179826 | -5.06996 |
| ACADM     | -0.72917 | 0.282468 | -1.73113 | 0.098933 | 0.179868 | -5.07033 |
| MAST2     | -0.34897 | 0.613102 | -1.73112 | 0.098933 | 0.179868 | -5.07033 |
| CTSL1     | -0.54118 | 0.041368 | -1.73108 | 0.098941 | 0.179868 | -5.0704  |
| VWDE      | 0.277296 | -0.22191 | 1.731039 | 0.098949 | 0.179868 | -5.07047 |
| CYC1      | 0.268355 | -0.23639 | 1.730615 | 0.099026 | 0.179975 | -5.07112 |
| FMNL3     | -0.44548 | 0.344188 | -1.73013 | 0.099114 | 0.180102 | -5.07186 |
| C20orf203 | -0.48312 | 0.273449 | -1.72487 | 0.100897 | 0.18263  | -5.07215 |
| PPA1      | -0.65695 | 0.408517 | -1.72482 | 0.100906 | 0.18263  | -5.07222 |
| KCND1     | -1.13336 | 1.502067 | -1.72989 | 0.099158 | 0.180165 | -5.07223 |
| NACA2     | -0.63519 | 0.91835  | -1.72936 | 0.099255 | 0.180316 | -5.07305 |
| CASC3     | 0.376771 | -0.15769 | 1.729322 | 0.099261 | 0.180316 | -5.07311 |
| CCDC80    | -0.40074 | 0.075398 | -1.69914 | 0.105723 | 0.189199 | -5.0732  |
| LOC10013: | -0.36947 | 0.017186 | -1.72393 | 0.101069 | 0.182829 | -5.07358 |
| ARHGEF7   | -0.30775 | 0.121124 | -1.7288  | 0.099357 | 0.180409 | -5.07391 |
| TUBA3C    | -0.27232 | 0.192107 | -1.72873 | 0.09937  | 0.180417 | -5.07402 |
| BRWD1     | -0.50589 | 0.599172 | -1.72834 | 0.09944  | 0.180527 | -5.07461 |
| GRAMD1B   | -0.79729 | 1.044602 | -1.72774 | 0.09955  | 0.180677 | -5.07554 |
| OSTBETA   | 0.287936 | -0.35977 | 1.69755  | 0.106029 | 0.189642 | -5.0756  |
| IRAK1BP1  | 0.361039 | 0.022838 | 1.722569 | 0.10132  | 0.183194 | -5.07566 |
| CDH11     | -0.55484 | 0.218637 | -1.72754 | 0.099587 | 0.180726 | -5.07585 |
| MYL1      | 0.822225 | -0.79698 | 1.601779 | 0.131735 | 0.223947 | -5.07607 |
| TNS3      | 0.520514 | 0.032466 | 1.727303 | 0.09963  | 0.180789 | -5.07621 |
| RSF1      | -0.70393 | 0.598382 | -1.72706 | 0.099675 | 0.180853 | -5.07659 |
| NCOA5     | -0.37452 | 0.401454 | -1.72687 | 0.09971  | 0.180891 | -5.07688 |
| NTRK3     | -0.3466  | -0.06698 | -1.72651 | 0.099775 | 0.180968 | -5.07743 |
| XXYL1     | 0.33254  | -0.25127 | 1.726512 | 0.099775 | 0.180968 | -5.07743 |
| SOX5      | 0.601366 | -0.11521 | 1.726006 | 0.099868 | 0.181103 | -5.07821 |
| SACM1L    | -0.61061 | -0.17148 | -1.72589 | 0.099889 | 0.181109 | -5.07838 |
| LOC10028: | -0.59225 | 1.179205 | -1.72589 | 0.09989  | 0.181109 | -5.07839 |
| GK5       | -0.59178 | 0.232985 | -1.6956  | 0.106403 | 0.190085 | -5.07853 |
| SCNN1G    | 0.366446 | -0.21855 | 1.725715 | 0.099921 | 0.181149 | -5.07866 |
| PCTP      | -0.38214 | 0.224096 | -1.72539 | 0.099981 | 0.18124  | -5.07915 |
| AJAP1     | -0.68495 | 0.392048 | -1.72531 | 0.099995 | 0.181249 | -5.07927 |
| MYOT      | 0.549371 | -0.60232 | 1.645164 | 0.124135 | 0.213937 | -5.07994 |
| SYCE2     | 0.630151 | -0.41679 | 1.598723 | 0.132414 | 0.224771 | -5.08032 |
| EHBP1L1   | -0.38346 | 0.424616 | -1.72421 | 0.100199 | 0.181584 | -5.08097 |

|           |          |          |          |          |          |          |
|-----------|----------|----------|----------|----------|----------|----------|
| EIF2S2    | -0.63487 | 0.501837 | -1.72407 | 0.100224 | 0.181614 | -5.08118 |
| LLGL1     | 0.206758 | -0.15264 | 1.723952 | 0.100245 | 0.181635 | -5.08136 |
| CCL15     | 0.388816 | -0.53781 | 1.718605 | 0.102054 | 0.184249 | -5.08171 |
| MAGEA4    | 0.382078 | -0.45133 | 1.718535 | 0.102067 | 0.184255 | -5.08182 |
| OR51Q1    | -0.42233 | 0.079712 | -1.68807 | 0.108777 | 0.193427 | -5.08282 |
| MVD       | -0.31411 | 0.25207  | -1.72298 | 0.100425 | 0.181925 | -5.08286 |
| NEUROG2   | -0.31463 | 0.066239 | -1.71738 | 0.102281 | 0.184556 | -5.08357 |
| PRLR      | 0.20207  | -0.0449  | 1.710868 | 0.104413 | 0.187471 | -5.08419 |
| FCGRT     | 0.274313 | -0.06766 | 1.721577 | 0.100683 | 0.18236  | -5.08501 |
| GALNT7    | -0.46475 | -0.08715 | -1.7213  | 0.100734 | 0.18242  | -5.08543 |
| ZNF664    | 0.488868 | -0.17137 | 1.721074 | 0.100776 | 0.182479 | -5.08578 |
| CGB1      | 0.42433  | -0.48579 | 1.720956 | 0.100798 | 0.182502 | -5.08596 |
| CD37      | -0.39711 | 0.522104 | -1.72077 | 0.100832 | 0.182531 | -5.08625 |
| APOL5     | 0.334345 | -0.27997 | 1.715343 | 0.102662 | 0.185038 | -5.08668 |
| TNKS      | -0.29659 | 0.075963 | -1.72008 | 0.10096  | 0.182711 | -5.0873  |
| HDHD2     | 0.381321 | -0.52942 | 1.719627 | 0.101044 | 0.182829 | -5.088   |
| CYP4A11   | 0.344227 | -0.35724 | 1.719615 | 0.101046 | 0.182829 | -5.08801 |
| MBP       | 0.567535 | 0.276634 | 1.719551 | 0.101058 | 0.182829 | -5.08811 |
| C12orf44  | -0.2607  | 0.179828 | -1.71935 | 0.101095 | 0.182853 | -5.08842 |
| SALL3     | -0.47234 | 0.135444 | -1.71852 | 0.101249 | 0.183115 | -5.08969 |
| TTBK2     | -0.26626 | 0.248652 | -1.71842 | 0.101267 | 0.183122 | -5.08984 |
| PCNX      | -0.55706 | 0.404972 | -1.7184  | 0.101271 | 0.183122 | -5.08987 |
| GRM7      | -0.38663 | 0.330762 | -1.71784 | 0.101375 | 0.183275 | -5.09073 |
| LRAT      | 0.307495 | -0.14053 | 1.717575 | 0.101424 | 0.183338 | -5.09114 |
| PTGS2     | 0.754863 | -0.7529  | 1.717556 | 0.101428 | 0.183338 | -5.09117 |
| POM121L8  | 0.472191 | -0.3342  | 1.717184 | 0.101497 | 0.183446 | -5.09174 |
| DKK2      | -0.36357 | 0.219222 | -1.71199 | 0.103288 | 0.185945 | -5.09177 |
| CCNY      | -0.38894 | 0.253848 | -1.71684 | 0.101561 | 0.183536 | -5.09227 |
| HIST1H2AC | -0.68976 | 0.266429 | -1.71682 | 0.101566 | 0.183536 | -5.0923  |
| SLC25A10  | -0.48384 | 0.594811 | -1.71648 | 0.101627 | 0.18363  | -5.09281 |
| KIF26B    | 0.562368 | -0.07249 | 1.716372 | 0.101648 | 0.183651 | -5.09298 |
| ERV3-2    | -0.85887 | 0.607278 | -1.7163  | 0.101662 | 0.183658 | -5.09309 |
| ZNF192    | -0.48969 | -0.00683 | -1.6974  | 0.107997 | 0.192267 | -5.0933  |
| HOXC8     | -0.18026 | 0.017492 | -1.71608 | 0.101703 | 0.183716 | -5.09343 |
| TADA1     | -0.36054 | 0.038771 | -1.71577 | 0.101761 | 0.183787 | -5.09391 |
| PGLYRP1   | -0.73253 | 0.837208 | -1.71522 | 0.101863 | 0.183954 | -5.09474 |
| C6orf35   | -0.30726 | 0.042146 | -1.71462 | 0.101975 | 0.184138 | -5.09566 |
| LOC100505 | -0.26672 | -0.00562 | -1.71457 | 0.101983 | 0.184138 | -5.09573 |
| LOC780525 | -0.41243 | 0.199026 | -1.67297 | 0.112779 | 0.198838 | -5.0969  |
| B4GALT4   | -0.61501 | 0.09269  | -1.71359 | 0.102168 | 0.184404 | -5.09724 |
| TMEM65    | 0.471175 | -0.49928 | 1.708325 | 0.103978 | 0.186922 | -5.09734 |
| FBXW4P1   | -0.46699 | 0.550321 | -1.71352 | 0.102181 | 0.184404 | -5.09735 |
| PIGN      | -0.39688 | 0.008473 | -1.71348 | 0.102187 | 0.184404 | -5.0974  |
| C5orf45   | 0.423774 | 0.035737 | 1.712543 | 0.102363 | 0.18467  | -5.09883 |
| VSX1      | 0.27214  | -0.39552 | 1.712225 | 0.102423 | 0.184761 | -5.09932 |
| ABCC3     | 0.724623 | 0.148809 | 1.712042 | 0.102457 | 0.184801 | -5.0996  |
| C7orf62   | 0.974814 | -0.65301 | 1.454713 | 0.168012 | 0.270793 | -5.09972 |

|           |          |          |          |          |          |          |
|-----------|----------|----------|----------|----------|----------|----------|
| RBMV2FP   | 0.3198   | -0.23535 | 1.676526 | 0.111046 | 0.196517 | -5.10002 |
| HTATSF1P2 | -1.07447 | 0.335514 | -1.71168 | 0.102525 | 0.184888 | -5.10015 |
| TTY9A     | 0.544569 | -0.21617 | 1.711649 | 0.102531 | 0.184888 | -5.1002  |
| ASPRV1    | 0.839027 | 0.271798 | 1.711504 | 0.102558 | 0.18492  | -5.10042 |
| SLC44A1   | -0.61145 | 0.154614 | -1.7113  | 0.102597 | 0.184956 | -5.10074 |
| ERAS      | 0.375321 | -0.21168 | 1.711027 | 0.102648 | 0.18503  | -5.10115 |
| LOC339290 | -0.6152  | 0.097156 | -1.71076 | 0.102698 | 0.185088 | -5.10156 |
| OR2T5     | -0.35813 | -0.01576 | -1.68015 | 0.109412 | 0.194221 | -5.10172 |
| CD3D      | 0.972191 | -0.87907 | 1.71051  | 0.102745 | 0.185154 | -5.10194 |
| AXIN2     | 0.493444 | -0.28426 | 1.710288 | 0.102786 | 0.185212 | -5.10228 |
| ACO2      | 0.283423 | 0.095009 | 1.710234 | 0.102797 | 0.185214 | -5.10236 |
| CIB4      | 0.480845 | 0.008653 | 1.704903 | 0.104626 | 0.187732 | -5.10253 |
| SRFBP1    | -0.37782 | 0.043313 | -1.70991 | 0.102858 | 0.185306 | -5.10286 |
| IRS2      | 0.334583 | 0.047408 | 1.709692 | 0.102899 | 0.185363 | -5.10319 |
| NDE1      | -0.49044 | 0.765912 | -1.70951 | 0.102932 | 0.185402 | -5.10346 |
| MKI67     | -0.91157 | 0.85138  | -1.70948 | 0.102939 | 0.185402 | -5.10352 |
| DDR2      | -0.44136 | 0.135366 | -1.67846 | 0.109745 | 0.194655 | -5.10425 |
| C2orf61   | -0.42183 | 0.414021 | -1.70892 | 0.103044 | 0.185574 | -5.10437 |
| XYLB      | -0.57063 | 0.196501 | -1.70849 | 0.103124 | 0.185701 | -5.10501 |
| SCAI      | -0.56287 | -0.0762  | -1.70831 | 0.103158 | 0.185745 | -5.10529 |
| PTPLAD1   | -0.33229 | 0.112768 | -1.70803 | 0.103213 | 0.185826 | -5.10573 |
| THNSL2    | 0.983154 | -0.28362 | 1.702498 | 0.105083 | 0.18838  | -5.10617 |
| SPATA16   | -0.30694 | 0.063788 | -1.70735 | 0.103341 | 0.186023 | -5.10676 |
| RAB6C     | 0.495241 | -0.27973 | 1.676547 | 0.110124 | 0.19515  | -5.10711 |
| LOC100501 | -0.58574 | 0.187667 | -1.70691 | 0.103423 | 0.186153 | -5.10743 |
| ZNF469    | 0.546147 | -0.22459 | 1.706862 | 0.103432 | 0.186153 | -5.1075  |
| PBX3      | -0.45168 | 0.417226 | -1.70677 | 0.10345  | 0.186168 | -5.10765 |
| EXOSC5    | 0.480429 | -0.15965 | 1.706674 | 0.103468 | 0.186183 | -5.10779 |
| NS3BP     | -0.70167 | 0.808185 | -1.70644 | 0.103512 | 0.186246 | -5.10815 |
| STMN2     | 0.463115 | -0.74886 | 1.705422 | 0.103705 | 0.186564 | -5.1097  |
| TM6SF1    | 0.356165 | -0.21614 | 1.705279 | 0.103732 | 0.186564 | -5.10992 |
| GPR17     | -0.41808 | 0.197758 | -1.70525 | 0.103737 | 0.186564 | -5.10995 |
| AS3MT     | 0.571542 | -0.36276 | 1.674625 | 0.110506 | 0.195713 | -5.10998 |
| RRP36     | 0.246674 | -0.18141 | 1.704624 | 0.103856 | 0.186761 | -5.11091 |
| DNAJC30   | 0.425846 | -0.04481 | 1.70452  | 0.103876 | 0.18678  | -5.11107 |
| CPSF4     | 0.240936 | -0.16704 | 1.703966 | 0.103981 | 0.186922 | -5.11191 |
| PTPRS     | 0.311488 | -0.17356 | 1.703919 | 0.10399  | 0.186922 | -5.11199 |
| CMA1      | -0.48395 | 0.247808 | -1.7039  | 0.103993 | 0.186922 | -5.11201 |
| ZC3H8     | -0.49131 | 0.505011 | -1.70345 | 0.104079 | 0.18706  | -5.1127  |
| SLC2A2    | -0.3364  | 0.147789 | -1.70334 | 0.104099 | 0.187079 | -5.11286 |
| LOC100495 | 0.345495 | -0.03853 | 1.703092 | 0.104147 | 0.18713  | -5.11324 |
| C14orf48  | 0.330933 | -0.13311 | 1.702839 | 0.104195 | 0.187199 | -5.11363 |
| PRORS1P   | -0.55275 | 0.136215 | -1.70252 | 0.104256 | 0.187281 | -5.11412 |
| TP73      | 0.258553 | -0.14259 | 1.7025   | 0.104259 | 0.187281 | -5.11414 |
| LOC401841 | -0.23647 | 0.154041 | -1.70212 | 0.104332 | 0.187394 | -5.11473 |
| LOC100501 | 0.591911 | -0.4434  | 1.702036 | 0.104348 | 0.187405 | -5.11485 |
| MED1      | -0.27984 | -0.03487 | -1.70194 | 0.104366 | 0.187421 | -5.115   |

|          |          |          |          |          |          |          |
|----------|----------|----------|----------|----------|----------|----------|
| TOB1     | -0.41991 | 0.04856  | -1.70178 | 0.104397 | 0.18746  | -5.11525 |
| PHB2     | 0.396539 | -0.31307 | 1.701417 | 0.104466 | 0.187533 | -5.11579 |
| UNC5D    | 0.648886 | -0.65456 | 1.689789 | 0.108443 | 0.192981 | -5.1159  |
| RPS18    | 0.873768 | -0.81    | 1.701075 | 0.104531 | 0.187631 | -5.11631 |
| HERC1    | -0.39044 | 0.321476 | -1.70088 | 0.104568 | 0.18768  | -5.11661 |
| LRRC28   | -0.3715  | 0.204665 | -1.70077 | 0.104589 | 0.187701 | -5.11678 |
| BORA     | -0.46951 | 0.197937 | -1.7007  | 0.104602 | 0.187707 | -5.11688 |
| GFAP     | 0.375843 | -0.04035 | 1.70045  | 0.10465  | 0.187759 | -5.11726 |
| ISG15    | 0.949979 | -0.2313  | 1.700074 | 0.104722 | 0.18787  | -5.11783 |
| SMARCD2  | -0.27947 | 0.27533  | -1.69968 | 0.104797 | 0.187988 | -5.11843 |
| NOX3     | -0.37816 | 0.015235 | -1.69405 | 0.106703 | 0.190517 | -5.11895 |
| KIF1C    | -0.42181 | 0.288025 | -1.69916 | 0.104897 | 0.188141 | -5.11922 |
| SALL1    | -0.16968 | 0.033936 | -1.69913 | 0.104901 | 0.188141 | -5.11926 |
| LINGO4   | 0.248636 | -0.21411 | 1.698934 | 0.10494  | 0.188192 | -5.11956 |
| S100A3   | 0.263815 | -0.21811 | 1.693548 | 0.106799 | 0.190619 | -5.1197  |
| G6PC     | 0.456162 | -0.3272  | 1.698624 | 0.104999 | 0.188282 | -5.12004 |
| C19orf52 | -0.28413 | 0.226023 | -1.69855 | 0.105014 | 0.188291 | -5.12015 |
| CP       | 0.530632 | -0.18352 | 1.667618 | 0.111906 | 0.197682 | -5.12042 |
| LOC40102 | 0.377554 | -0.25866 | 1.698347 | 0.105052 | 0.188342 | -5.12046 |
| PLRG1    | -0.57251 | 0.225428 | -1.69803 | 0.105113 | 0.188416 | -5.12094 |
| OPN1MW   | 0.261047 | -0.27627 | 1.697618 | 0.105192 | 0.188529 | -5.12156 |
| SOCS2    | -0.85229 | 0.529867 | -1.6976  | 0.105195 | 0.188529 | -5.12159 |
| LOC10013 | 0.505356 | -0.16446 | 1.697508 | 0.105213 | 0.188544 | -5.12173 |
| CPZ      | -0.40553 | -0.02995 | -1.69198 | 0.107101 | 0.191037 | -5.12206 |
| PRCC     | -0.46577 | 0.791724 | -1.69714 | 0.105283 | 0.188652 | -5.12228 |
| LOC10050 | -0.35976 | 0.055074 | -1.6969  | 0.105329 | 0.188703 | -5.12265 |
| DNAJC24  | 0.498182 | -0.0308  | 1.696894 | 0.105331 | 0.188703 | -5.12266 |
| METTL2B  | -0.3832  | 0.278136 | -1.69638 | 0.105429 | 0.188862 | -5.12344 |
| PPOX     | 0.29189  | -0.07648 | 1.696068 | 0.105489 | 0.188953 | -5.12392 |
| FAM188B  | -0.46383 | 0.057275 | -1.69596 | 0.105511 | 0.188975 | -5.12409 |
| FGF23    | -0.3718  | 0.004545 | -1.69584 | 0.105533 | 0.188997 | -5.12426 |
| TCEA1    | -0.33225 | 0.1509   | -1.6957  | 0.10556  | 0.189029 | -5.12448 |
| LOC10013 | 0.385638 | -0.04177 | 1.664874 | 0.112459 | 0.1984   | -5.1245  |
| MYLIP    | -0.40855 | 0.630173 | -1.6956  | 0.105579 | 0.18904  | -5.12462 |
| GABARAPL | -0.36219 | 0.06211  | -1.69553 | 0.105593 | 0.18904  | -5.12473 |
| KCNJ9    | 0.292772 | -0.27556 | 1.695492 | 0.1056   | 0.18904  | -5.12479 |
| PAN2     | -0.3884  | 0.515557 | -1.69542 | 0.105615 | 0.18904  | -5.1249  |
| MGC1305  | -0.46461 | 0.239988 | -1.69541 | 0.105615 | 0.18904  | -5.12491 |
| LOC10050 | 0.319322 | -0.27748 | 1.683477 | 0.109675 | 0.194566 | -5.12534 |
| UGT2B7   | -0.48297 | 0.226501 | -1.69507 | 0.105682 | 0.189143 | -5.12543 |
| THSD4    | -0.41492 | -0.18403 | -1.68894 | 0.107692 | 0.191811 | -5.12664 |
| GMCL1P1  | 0.284535 | -0.12162 | 1.693833 | 0.10592  | 0.189505 | -5.1273  |
| OR1D5    | -0.24712 | 0.047302 | -1.69382 | 0.105923 | 0.189505 | -5.12733 |
| DIEXF    | -0.66674 | 0.760662 | -1.69372 | 0.105941 | 0.18952  | -5.12747 |
| ADCY5    | -0.29385 | -0.14341 | -1.68191 | 0.109983 | 0.194935 | -5.12767 |
| SDHAP1   | -0.25618 | 0.16092  | -1.69332 | 0.106019 | 0.189641 | -5.12808 |
| NBPF15   | -0.34924 | 0.291485 | -1.69254 | 0.106169 | 0.189844 | -5.12926 |

|           |          |          |          |          |          |          |
|-----------|----------|----------|----------|----------|----------|----------|
| CHST6     | -0.5239  | 0.148742 | -1.69249 | 0.106178 | 0.189844 | -5.12933 |
| ATP2B4    | -0.62073 | 0.420899 | -1.69245 | 0.106187 | 0.189844 | -5.1294  |
| LRRC3     | 0.240613 | -0.25636 | 1.692398 | 0.106197 | 0.189844 | -5.12948 |
| PRR22     | -0.41399 | 0.503275 | -1.69238 | 0.1062   | 0.189844 | -5.1295  |
| ADAMTS8   | -0.39965 | 0.124842 | -1.69222 | 0.106231 | 0.189883 | -5.12975 |
| PAX3      | 0.578369 | -0.25771 | 1.691969 | 0.10628  | 0.189952 | -5.13013 |
| ABHD6     | 0.390422 | -0.23864 | 1.691819 | 0.106309 | 0.189986 | -5.13035 |
| DDA1      | -0.21001 | 0.066966 | -1.69166 | 0.10634  | 0.190026 | -5.1306  |
| GFRAL     | 0.238711 | -0.0473  | 1.68628  | 0.10821  | 0.192594 | -5.13064 |
| RPS25     | 0.717352 | -0.29806 | 1.691597 | 0.106352 | 0.190029 | -5.13069 |
| RCSD1     | 0.298339 | -0.21583 | 1.691465 | 0.106377 | 0.190057 | -5.13089 |
| PHGDH     | -0.55669 | 0.866936 | -1.69115 | 0.106438 | 0.190131 | -5.13137 |
| OR1Q1     | -0.34257 | 0.157054 | -1.69065 | 0.106536 | 0.190288 | -5.13213 |
| PRKRIR    | -0.65283 | 0.313629 | -1.69036 | 0.106591 | 0.190369 | -5.13256 |
| GJA4      | 0.357176 | -0.06943 | 1.690151 | 0.106632 | 0.190425 | -5.13288 |
| DRD2      | 0.306442 | -0.18017 | 1.690041 | 0.106653 | 0.190446 | -5.13305 |
| ARHGAP12  | -0.50908 | -0.10789 | -1.68967 | 0.106724 | 0.190536 | -5.1336  |
| SCGB1D1   | -0.52113 | -0.10849 | -1.68426 | 0.108605 | 0.193157 | -5.13368 |
| APBB2     | -0.60184 | 0.273579 | -1.68962 | 0.106735 | 0.190536 | -5.13368 |
| NCSTN     | -0.26748 | 0.141922 | -1.68958 | 0.106742 | 0.190536 | -5.13374 |
| UPK1B     | -0.47159 | 0.083324 | -1.68912 | 0.106832 | 0.190662 | -5.13444 |
| ADAR      | -0.82151 | 0.750314 | -1.68903 | 0.10685  | 0.190675 | -5.13458 |
| PDCD7     | -0.41272 | 0.278243 | -1.68881 | 0.106893 | 0.190735 | -5.13491 |
| LOC284885 | -0.37622 | 0.656281 | -1.68849 | 0.106955 | 0.190829 | -5.1354  |
| DTX1      | -0.75927 | 0.953086 | -1.68818 | 0.107014 | 0.190916 | -5.13585 |
| ADAM20    | -0.41023 | 0.062567 | -1.68271 | 0.108909 | 0.19354  | -5.13601 |
| CPD       | -0.74779 | 0.068274 | -1.68776 | 0.107097 | 0.191037 | -5.13649 |
| HIST1H3B  | -0.45405 | 0.520969 | -1.68754 | 0.10714  | 0.191089 | -5.13683 |
| ZNF80     | 0.297472 | 0.084971 | 1.687443 | 0.107158 | 0.191104 | -5.13697 |
| XKR4      | -0.4733  | 0.214865 | -1.68719 | 0.107207 | 0.191173 | -5.13735 |
| RHOXF2    | -0.59819 | 0.088172 | -1.68682 | 0.10728  | 0.191286 | -5.13792 |
| CSF1      | -0.61137 | 0.25798  | -1.68668 | 0.107308 | 0.191318 | -5.13813 |
| OR10H3    | -0.56023 | 0.071569 | -1.68632 | 0.107377 | 0.191425 | -5.13867 |
| LOC100506 | 0.717827 | 0.03239  | 1.686147 | 0.107411 | 0.191467 | -5.13893 |
| EIF3H     | 0.384044 | -0.44606 | 1.685969 | 0.107446 | 0.191512 | -5.1392  |
| GRTP1     | 0.611354 | -0.13156 | 1.680454 | 0.109352 | 0.194169 | -5.13938 |
| FOXO4     | 0.308853 | -0.10076 | 1.685545 | 0.107528 | 0.191642 | -5.13984 |
| ANTXR2    | -0.62385 | 0.529645 | -1.68549 | 0.107539 | 0.191644 | -5.13993 |
| ANKRD12   | -0.438   | 0.114596 | -1.68532 | 0.107573 | 0.191686 | -5.14018 |
| PCDHGA3   | -0.40385 | -0.10108 | -1.67987 | 0.109468 | 0.194304 | -5.14027 |
| NR1D1     | 0.548401 | -0.00875 | 1.685263 | 0.107584 | 0.191688 | -5.14027 |
| HOXA9     | -0.91407 | 0.980469 | -1.6849  | 0.107654 | 0.191783 | -5.14081 |
| COG1      | 0.246026 | 0.062754 | 1.684813 | 0.107672 | 0.191793 | -5.14095 |
| RRN3P3    | -0.30469 | 0.416136 | -1.68461 | 0.10771  | 0.191827 | -5.14125 |
| PDE8B     | 0.419035 | -0.68697 | 1.525805 | 0.155626 | 0.255261 | -5.1413  |
| C20orf94  | -0.36266 | 0.337472 | -1.68454 | 0.107725 | 0.191835 | -5.14136 |
| RNASE6    | 0.62485  | -0.16871 | 1.683249 | 0.107978 | 0.192267 | -5.14331 |

|           |          |          |          |          |          |          |
|-----------|----------|----------|----------|----------|----------|----------|
| ALMS1     | 0.436184 | -0.12436 | 1.683185 | 0.10799  | 0.192267 | -5.1434  |
| BACH2     | 0.548303 | -0.49143 | 1.682905 | 0.108045 | 0.192336 | -5.14382 |
| POLG2     | -0.34777 | 0.10944  | -1.68283 | 0.10806  | 0.192345 | -5.14394 |
| RWDD2A    | 0.585021 | -0.47681 | 1.676201 | 0.110193 | 0.195237 | -5.14576 |
| CCDC59    | 0.310777 | -0.34247 | 1.680826 | 0.108454 | 0.192981 | -5.14696 |
| PIWIL1    | 0.526715 | 0.101367 | 1.68081  | 0.108457 | 0.192981 | -5.14698 |
| RASSF8    | -0.42492 | 0.157067 | -1.68053 | 0.108512 | 0.193061 | -5.1474  |
| PFAS      | -0.74173 | 0.653142 | -1.68045 | 0.108529 | 0.193074 | -5.14753 |
| NCAPD2    | -0.33144 | 0.398111 | -1.68021 | 0.108576 | 0.19314  | -5.14789 |
| FAM20B    | 0.395663 | -0.063   | 1.680064 | 0.108604 | 0.193157 | -5.14811 |
| DRP2      | -0.31763 | 0.136193 | -1.67944 | 0.108727 | 0.193356 | -5.14905 |
| LOC100509 | -0.45753 | 0.059846 | -1.67912 | 0.10879  | 0.193432 | -5.14953 |
| BTG3      | -0.51018 | 0.46731  | -1.67888 | 0.108837 | 0.193497 | -5.14989 |
| SLC6A6    | -0.5951  | 0.424831 | -1.67884 | 0.108846 | 0.193497 | -5.14995 |
| MED28     | -0.40797 | 0.114156 | -1.67872 | 0.108869 | 0.193504 | -5.15013 |
| STEAP2    | 0.517009 | -0.10084 | 1.678717 | 0.108869 | 0.193504 | -5.15013 |
| FAM26F    | -0.85699 | -0.05091 | -1.67862 | 0.108888 | 0.193519 | -5.15028 |
| NFIC      | 0.479927 | 0.143529 | 1.678344 | 0.108943 | 0.193582 | -5.1507  |
| GLTSCR2   | 0.497599 | -0.20831 | 1.678116 | 0.108988 | 0.193645 | -5.15104 |
| CITED2    | 0.2298   | -0.07128 | 1.677877 | 0.109035 | 0.193711 | -5.1514  |
| B4GALT1   | -0.27409 | 0.344611 | -1.67765 | 0.10908  | 0.193773 | -5.15174 |
| C22orf26  | 0.336125 | -0.35984 | 1.672131 | 0.111003 | 0.196486 | -5.15184 |
| FLJ39653  | -0.71391 | 0.828321 | -1.67754 | 0.109103 | 0.193795 | -5.15191 |
| TOX4      | 0.241988 | -0.27874 | 1.677177 | 0.109174 | 0.193904 | -5.15245 |
| ITPRIP    | -0.33013 | 0.357918 | -1.67711 | 0.109186 | 0.193909 | -5.15255 |
| DEFB103B  | 0.453458 | -0.45944 | 1.607591 | 0.125454 | 0.215684 | -5.15335 |
| PIGM      | -0.3078  | 0.118595 | -1.67651 | 0.109305 | 0.194103 | -5.15345 |
| AGRN      | -0.32115 | 0.283455 | -1.67618 | 0.109372 | 0.194186 | -5.15396 |
| FRMD4B    | -0.48711 | 0.287681 | -1.67598 | 0.10941  | 0.194221 | -5.15424 |
| SHROOM2   | -0.40535 | 0.107763 | -1.67542 | 0.109523 | 0.194383 | -5.1551  |
| SLC22A18  | -0.45102 | 0.426724 | -1.6753  | 0.109546 | 0.194387 | -5.15527 |
| GPR158    | -0.35355 | -0.16702 | -1.67529 | 0.109548 | 0.194387 | -5.15529 |
| EPOR      | 0.302152 | 0.010175 | 1.675257 | 0.109554 | 0.194387 | -5.15534 |
| CDKL3     | -0.28495 | 0.101818 | -1.67503 | 0.1096   | 0.19445  | -5.15568 |
| F3        | 0.513816 | -0.52328 | 1.601306 | 0.127873 | 0.218843 | -5.15581 |
| LOC283174 | 0.442338 | -0.20392 | 1.643501 | 0.116842 | 0.204247 | -5.1561  |
| LOC100509 | 0.959317 | -0.34249 | 1.489277 | 0.158806 | 0.259261 | -5.15631 |
| CIRH1A    | -0.44014 | 0.571359 | -1.67436 | 0.109732 | 0.194648 | -5.15668 |
| CPLX3     | -0.52784 | 0.227999 | -1.67415 | 0.109774 | 0.194686 | -5.157   |
| SHOC2     | -0.52289 | -0.15503 | -1.67411 | 0.109783 | 0.194686 | -5.15707 |
| ZNF238    | -0.73533 | 0.37007  | -1.6738  | 0.109844 | 0.194772 | -5.15753 |
| CFL2      | 0.392675 | -0.19224 | 1.673718 | 0.10986  | 0.194772 | -5.15765 |
| IFT46     | -0.34769 | 0.165495 | -1.67371 | 0.109862 | 0.194772 | -5.15766 |
| PRRG4     | -0.35989 | 0.145656 | -1.67366 | 0.109871 | 0.194772 | -5.15773 |
| DTYMK     | -0.41492 | 0.354146 | -1.67359 | 0.109886 | 0.194781 | -5.15785 |
| ABCA7     | -0.32859 | 0.58508  | -1.67254 | 0.110094 | 0.195114 | -5.15941 |
| HAUS5     | -0.73269 | 0.713368 | -1.67168 | 0.110266 | 0.195348 | -5.16071 |



|            |          |          |          |          |          |          |
|------------|----------|----------|----------|----------|----------|----------|
| ACTB       | -0.33413 | 0.38311  | -1.67115 | 0.110373 | 0.19552  | -5.16151 |
| MCM9       | -0.53399 | 0.450265 | -1.67055 | 0.110491 | 0.195712 | -5.1624  |
| MRT04      | -0.53032 | 0.34342  | -1.67045 | 0.110512 | 0.195713 | -5.16255 |
| C15orf38-7 | 0.612465 | -0.31571 | 1.664831 | 0.112467 | 0.1984   | -5.16273 |
| C9orf5     | -0.51578 | 0.447352 | -1.67    | 0.110603 | 0.195856 | -5.16324 |
| ADI1       | -0.36406 | 0.138034 | -1.66976 | 0.11065  | 0.195922 | -5.16359 |
| WNT2B      | 0.577904 | -0.59332 | 1.633069 | 0.119954 | 0.208423 | -5.16398 |
| LOC100288  | 0.297981 | -0.42548 | 1.669256 | 0.110751 | 0.196084 | -5.16435 |
| LOC286359  | 0.5155   | -0.38188 | 1.637852 | 0.118024 | 0.205793 | -5.16441 |
| VN1R3      | -0.59654 | 0.344688 | -1.66327 | 0.112784 | 0.198838 | -5.16506 |
| NTRK2      | -0.36287 | 0.111412 | -1.66853 | 0.110897 | 0.196324 | -5.16544 |
| KHDC1      | -0.27478 | 0.284183 | -1.66797 | 0.111008 | 0.196486 | -5.16627 |
| KCNK16     | -0.3404  | 0.087917 | -1.66785 | 0.111034 | 0.196513 | -5.16646 |
| ZBTB47     | -0.43316 | 0.48656  | -1.66762 | 0.111079 | 0.196558 | -5.1668  |
| EEA1       | -0.47358 | -0.0998  | -1.66725 | 0.111153 | 0.196671 | -5.16735 |
| LOC100129  | 0.405801 | -0.12629 | 1.661702 | 0.1131   | 0.19927  | -5.16739 |
| INA        | 0.33803  | -0.28066 | 1.66716  | 0.111172 | 0.196686 | -5.16749 |
| WDR60      | -0.40022 | 0.062275 | -1.63568 | 0.118482 | 0.206377 | -5.1676  |
| C12orf35   | 0.83029  | -0.50199 | 1.667072 | 0.111189 | 0.196699 | -5.16762 |
| MFSD9      | -0.47612 | 0.230761 | -1.66694 | 0.111217 | 0.19673  | -5.16782 |
| CDK2       | -0.5011  | 0.582237 | -1.66648 | 0.111308 | 0.196844 | -5.1685  |
| SOD1       | 0.423535 | -0.09662 | 1.666473 | 0.11131  | 0.196844 | -5.16852 |
| TRPM4      | 0.430295 | 0.175272 | 1.666465 | 0.111311 | 0.196844 | -5.16853 |
| PRSS57     | 0.717672 | -0.28454 | 1.666011 | 0.111403 | 0.196988 | -5.16921 |
| TCTN1      | 0.522368 | -0.15916 | 1.665934 | 0.111418 | 0.196997 | -5.16932 |
| TAF13      | -0.35369 | 0.001367 | -1.66589 | 0.111428 | 0.196997 | -5.16939 |
| TP53TG3    | 0.309102 | -0.33273 | 1.665223 | 0.111561 | 0.197208 | -5.17039 |
| LMAN2L     | -0.23515 | 0.173825 | -1.66519 | 0.111567 | 0.197208 | -5.17043 |
| LOC340508  | 0.532302 | 0.126287 | 1.659522 | 0.113543 | 0.199856 | -5.17063 |
| WDR96      | -0.50157 | 0.174538 | -1.66454 | 0.111699 | 0.19741  | -5.17141 |
| SLIT3      | -0.45479 | -0.02937 | -1.66449 | 0.11171  | 0.19741  | -5.17149 |
| OTX2       | -0.43591 | -0.01073 | -1.66448 | 0.111712 | 0.19741  | -5.1715  |
| RNPS1      | -0.72027 | 0.666849 | -1.66401 | 0.111806 | 0.197559 | -5.1722  |
| SBNO1      | -0.50947 | 0.281535 | -1.66376 | 0.111858 | 0.197632 | -5.17258 |
| MRPL45     | 0.37511  | -0.21498 | 1.663567 | 0.111896 | 0.197681 | -5.17286 |
| FYB        | -0.51272 | 0.491371 | -1.66316 | 0.111979 | 0.197793 | -5.17348 |
| GLUD2      | -0.44563 | 0.081063 | -1.66305 | 0.112001 | 0.197814 | -5.17364 |
| SDAD1      | -0.3505  | 0.241901 | -1.66288 | 0.112035 | 0.197856 | -5.17389 |
| APP        | -0.63129 | 0.578908 | -1.66277 | 0.112056 | 0.197864 | -5.17405 |
| EBP        | 0.382699 | -0.18142 | 1.662756 | 0.11206  | 0.197864 | -5.17408 |
| SALL2      | 0.374205 | -0.0451  | 1.662653 | 0.112081 | 0.197883 | -5.17423 |
| DBIL5P2    | -0.2321  | 0.082466 | -1.66238 | 0.112136 | 0.197958 | -5.17464 |
| TMEM45A    | -0.75102 | 0.402942 | -1.66234 | 0.112143 | 0.197958 | -5.17469 |
| MYO6       | -0.40468 | 0.098429 | -1.66193 | 0.112226 | 0.198087 | -5.17531 |
| BACE2      | 0.449484 | -0.03503 | 1.661676 | 0.112278 | 0.198161 | -5.17569 |
| VSTM2L     | 0.471515 | -0.02432 | 1.661237 | 0.112368 | 0.1983   | -5.17635 |
| CCDC116    | -0.38343 | 0.113822 | -1.64892 | 0.116637 | 0.204016 | -5.17656 |

|           |          |          |          |          |          |          |
|-----------|----------|----------|----------|----------|----------|----------|
| NR1I2     | -0.38922 | 0.084246 | -1.65537 | 0.114391 | 0.201074 | -5.17679 |
| SLC41A1   | 0.481825 | -0.22332 | 1.660928 | 0.11243  | 0.198393 | -5.17681 |
| FAM108C1  | -0.47092 | 0.153885 | -1.66082 | 0.112452 | 0.1984   | -5.17697 |
| ADAMTS2   | -0.64121 | 0.345587 | -1.66071 | 0.112475 | 0.1984   | -5.17714 |
| SP3P      | -0.48138 | 0.146248 | -1.59093 | 0.129166 | 0.220498 | -5.1772  |
| KIAA1199  | 0.617945 | -0.05383 | 1.660576 | 0.112502 | 0.19843  | -5.17733 |
| CCDC19    | 0.587237 | 0.09721  | 1.659845 | 0.11265  | 0.198674 | -5.17842 |
| OR6N1     | -0.32467 | -0.06452 | -1.65965 | 0.112689 | 0.198724 | -5.17871 |
| TBC1D9    | 0.523784 | -0.31095 | 1.659452 | 0.11273  | 0.198779 | -5.17901 |
| SCUBE2    | -0.48484 | 0.296448 | -1.65891 | 0.11284  | 0.198919 | -5.17982 |
| GFI1B     | 0.454102 | 0.080777 | 1.658521 | 0.11292  | 0.199042 | -5.1804  |
| PKM2      | -0.4305  | 0.410275 | -1.65835 | 0.112954 | 0.19908  | -5.18066 |
| FBXL19-AS | -0.32667 | -0.05089 | -1.65831 | 0.112961 | 0.19908  | -5.18071 |
| ZNF41     | -0.42947 | 0.4199   | -1.65824 | 0.112976 | 0.199087 | -5.18081 |
| ZCCHC5    | 0.309423 | -0.26411 | 1.626585 | 0.120413 | 0.209024 | -5.1809  |
| MGC4859   | 0.508985 | -0.12974 | 1.652311 | 0.115018 | 0.201941 | -5.18132 |
| LOC100190 | -0.27877 | -0.0228  | -1.65771 | 0.113085 | 0.199261 | -5.18161 |
| PDE10A    | -0.51493 | 0.233011 | -1.65199 | 0.115085 | 0.20204  | -5.1818  |
| SAAL1     | -0.39916 | 0.180737 | -1.65726 | 0.113176 | 0.199369 | -5.18228 |
| ZNF8      | -0.21954 | 0.10801  | -1.65698 | 0.113234 | 0.199453 | -5.1827  |
| RNMT      | 0.397797 | -0.16758 | 1.656744 | 0.113282 | 0.199519 | -5.18305 |
| CAMK2G    | -0.40011 | 0.674456 | -1.65657 | 0.113316 | 0.199562 | -5.1833  |
| TAF3      | 0.670628 | -0.06939 | 1.655916 | 0.113451 | 0.199781 | -5.18428 |
| FBXW4     | -0.28619 | 0.369558 | -1.65583 | 0.113468 | 0.199793 | -5.18441 |
| SCRT1     | 0.226158 | -0.20973 | 1.655778 | 0.113479 | 0.199795 | -5.18449 |
| GOLGB1    | -0.33614 | 0.249787 | -1.65553 | 0.113529 | 0.199856 | -5.18485 |
| ZNF703    | 0.288179 | -0.05435 | 1.655459 | 0.113545 | 0.199856 | -5.18496 |
| C21orf15  | 0.672332 | -0.07525 | 1.655354 | 0.113566 | 0.199875 | -5.18512 |
| COL22A1   | -0.43259 | 0.127365 | -1.6553  | 0.113577 | 0.199877 | -5.1852  |
| COQ6      | 0.33256  | -0.19177 | 1.65518  | 0.113602 | 0.19989  | -5.18538 |
| SLC25A5   | -0.31272 | 0.137855 | -1.65516 | 0.113605 | 0.19989  | -5.1854  |
| SAP30     | -0.64759 | 0.471962 | -1.65476 | 0.113687 | 0.200017 | -5.186   |
| ZNF827    | -0.89831 | 1.670485 | -1.6544  | 0.113761 | 0.200128 | -5.18653 |
| GPR110    | -0.66915 | 0.127144 | -1.65432 | 0.113779 | 0.200142 | -5.18667 |
| CYP39A1   | 0.554385 | -0.61129 | 1.584165 | 0.130698 | 0.222589 | -5.18682 |
| SLX1A     | -0.26046 | 0.137719 | -1.65379 | 0.113887 | 0.200315 | -5.18746 |
| CYB5R3    | -0.34076 | 0.543326 | -1.65365 | 0.113914 | 0.200331 | -5.18765 |
| Mar-02    | 0.518082 | -0.05498 | 1.653642 | 0.113917 | 0.200331 | -5.18767 |
| CYP2A6    | 0.288444 | -0.23127 | 1.621479 | 0.121509 | 0.210415 | -5.18835 |
| C12orf75  | 0.51688  | 0.077924 | 1.652982 | 0.114052 | 0.200533 | -5.18865 |
| NDUFA3    | 0.348368 | -0.13611 | 1.652981 | 0.114052 | 0.200533 | -5.18865 |
| ZNF277    | -0.55045 | 0.370644 | -1.64706 | 0.116101 | 0.203318 | -5.18908 |
| CD19      | -0.44119 | 0.277533 | -1.65235 | 0.114183 | 0.200745 | -5.1896  |
| FTSJ2     | -0.41382 | 0.547562 | -1.65168 | 0.11432  | 0.200968 | -5.19059 |
| KRTAP4-5  | 0.279971 | -0.55421 | 1.621452 | 0.124623 | 0.214556 | -5.19065 |
| OLFML3    | -0.66685 | 0.415565 | -1.64572 | 0.116379 | 0.203692 | -5.19106 |
| MSRB3     | -1.00905 | 0.711778 | -1.65111 | 0.114437 | 0.201137 | -5.19143 |

|           |          |          |          |          |          |          |
|-----------|----------|----------|----------|----------|----------|----------|
| GFER      | -0.32259 | 0.486368 | -1.65075 | 0.114512 | 0.20125  | -5.19197 |
| C1orf111  | 0.30124  | -0.16878 | 1.645029 | 0.116524 | 0.203836 | -5.19209 |
| ALX3      | 0.256739 | -0.21346 | 1.650498 | 0.114563 | 0.201323 | -5.19235 |
| SYNDIG1L  | -0.35144 | 0.071368 | -1.65031 | 0.114603 | 0.201375 | -5.19263 |
| TRAF6     | -0.28812 | 0.028298 | -1.64975 | 0.114718 | 0.20154  | -5.19346 |
| IL6R      | -0.51614 | 0.527197 | -1.64972 | 0.114724 | 0.20154  | -5.1935  |
| CLEC16A   | -0.27315 | 0.302714 | -1.6497  | 0.114728 | 0.20154  | -5.19353 |
| SEC61G    | -0.46743 | 0.02593  | -1.64952 | 0.114766 | 0.20157  | -5.1938  |
| LOC100129 | 0.632518 | -0.00186 | 1.643659 | 0.116809 | 0.204218 | -5.19411 |
| C11orf57  | -0.53933 | 0.406359 | -1.64924 | 0.114824 | 0.201654 | -5.19422 |
| CAPN8     | -0.45999 | 0.370454 | -1.64854 | 0.114967 | 0.201875 | -5.19525 |
| ZRANB3    | -0.34305 | 0.155055 | -1.64853 | 0.11497  | 0.201875 | -5.19527 |
| NBPF14    | -0.41937 | 0.158086 | -1.64782 | 0.115118 | 0.20208  | -5.19633 |
| IGSF10    | 0.457307 | -0.33859 | 1.610737 | 0.124764 | 0.214704 | -5.19637 |
| EEF1G     | 0.538067 | -0.6404  | 1.647742 | 0.115133 | 0.202088 | -5.19644 |
| LOC158407 | 0.415703 | -0.24475 | 1.647689 | 0.115144 | 0.20209  | -5.19652 |
| SERPINB5  | -0.47986 | 0.260237 | -1.64749 | 0.115185 | 0.202143 | -5.19681 |
| CYCS      | -0.33012 | 0.00994  | -1.64728 | 0.115229 | 0.202173 | -5.19713 |
| SPEF2     | 0.328023 | 0.007906 | 1.647259 | 0.115233 | 0.202173 | -5.19716 |
| DUSP22    | -0.24543 | 0.002948 | -1.64723 | 0.11524  | 0.202173 | -5.19721 |
| FLT3LG    | 0.586344 | -0.00388 | 1.647212 | 0.115243 | 0.202173 | -5.19723 |
| TTLL10    | -0.47852 | 0.247725 | -1.64707 | 0.115272 | 0.202188 | -5.19744 |
| HIST1H2BC | -0.53808 | 0.513962 | -1.64637 | 0.115417 | 0.202423 | -5.19847 |
| LOC648777 | 0.63014  | -0.43046 | 1.645946 | 0.115505 | 0.202546 | -5.1991  |
| SAMD10    | 0.278822 | 0.020108 | 1.645937 | 0.115507 | 0.202546 | -5.19912 |
| PLIN1     | 0.527531 | -0.02731 | 1.640201 | 0.117531 | 0.205214 | -5.19921 |
| C22orf32  | 0.308892 | -0.20042 | 1.645798 | 0.115536 | 0.202578 | -5.19932 |
| SEMA5B    | -0.2589  | 0.146828 | -1.633   | 0.119968 | 0.208428 | -5.19989 |
| ART3      | 0.582932 | -0.39299 | 1.645381 | 0.115623 | 0.202712 | -5.19994 |
| RBM4      | -0.32882 | 0.498435 | -1.64531 | 0.115638 | 0.202721 | -5.20005 |
| COX5A     | -0.58605 | 0.537609 | -1.64518 | 0.115665 | 0.20275  | -5.20024 |
| CELF6     | -0.8345  | 0.549437 | -1.64481 | 0.11574  | 0.202864 | -5.20078 |
| MRP63     | -0.36292 | 0.381068 | -1.64473 | 0.115758 | 0.202876 | -5.20091 |
| DNAH7     | -0.66979 | 0.286238 | -1.64451 | 0.115804 | 0.202931 | -5.20124 |
| MARVELD3  | -0.44798 | 0.143982 | -1.64446 | 0.115814 | 0.202931 | -5.2013  |
| C20orf177 | -0.38302 | -0.21596 | -1.64443 | 0.11582  | 0.202931 | -5.20135 |
| SPATA19   | -0.3321  | 0.0342   | -1.64421 | 0.115865 | 0.202992 | -5.20167 |
| SNRPB2    | 0.238128 | -0.34648 | 1.643672 | 0.115978 | 0.203154 | -5.20248 |
| LOC727820 | 0.417429 | -0.16388 | 1.643068 | 0.116104 | 0.203318 | -5.20337 |
| C14orf119 | -0.41524 | 0.292791 | -1.64304 | 0.116111 | 0.203318 | -5.20342 |
| CCDC63    | -0.51581 | 0.101296 | -1.64302 | 0.116114 | 0.203318 | -5.20344 |
| GPR107    | -0.33131 | 0.126507 | -1.64292 | 0.116134 | 0.203336 | -5.20358 |
| CTDNEP1   | -0.25764 | 0.406841 | -1.6426  | 0.116201 | 0.203417 | -5.20406 |
| RPRML     | -0.3514  | 0.078658 | -1.64199 | 0.11633  | 0.203623 | -5.20497 |
| IL17D     | -0.50299 | 0.364803 | -1.64168 | 0.116394 | 0.2037   | -5.20543 |
| POLQ      | -0.45689 | 0.131221 | -1.64152 | 0.116427 | 0.203721 | -5.20566 |
| LOC100507 | 0.26698  | -0.17425 | 1.641232 | 0.116487 | 0.203794 | -5.20609 |

|           |          |          |          |          |          |          |
|-----------|----------|----------|----------|----------|----------|----------|
| EBAG9     | -0.43394 | 0.312175 | -1.64122 | 0.116489 | 0.203794 | -5.2061  |
| ALG10B    | -0.42959 | -0.13724 | -1.64016 | 0.116711 | 0.204128 | -5.20767 |
| ADAT2     | -0.54566 | 0.476738 | -1.64004 | 0.116738 | 0.204156 | -5.20786 |
| LOC100190 | -0.336   | 0.371762 | -1.63992 | 0.116763 | 0.204165 | -5.20804 |
| C8orf37   | -0.61196 | 0.385871 | -1.63991 | 0.116764 | 0.204165 | -5.20805 |
| FARSB     | -0.44327 | 0.235092 | -1.63967 | 0.116815 | 0.204218 | -5.20841 |
| DLGAP1    | -0.34636 | 0.039066 | -1.63392 | 0.118853 | 0.206894 | -5.20844 |
| AKAP13    | -0.65948 | 0.371662 | -1.63894 | 0.116968 | 0.20445  | -5.20949 |
| ATXN1     | -0.51069 | 0.239533 | -1.63859 | 0.11704  | 0.204555 | -5.20999 |
| C10orf58  | -0.50176 | 0.388033 | -1.63855 | 0.117049 | 0.204555 | -5.21006 |
| CLDN12    | -0.3431  | 0.040247 | -1.63841 | 0.11708  | 0.204589 | -5.21027 |
| ATP10D    | -0.36902 | 0.103136 | -1.63831 | 0.1171   | 0.204594 | -5.21042 |
| GPR52     | 0.361825 | -0.33008 | 1.638292 | 0.117103 | 0.204594 | -5.21044 |
| PNMA6A    | 0.401454 | -0.03555 | 1.632472 | 0.11916  | 0.207374 | -5.21057 |
| DENND5B   | -0.56866 | 0.88647  | -1.63802 | 0.11716  | 0.204674 | -5.21083 |
| TTLL2     | -0.32356 | 0.096936 | -1.63194 | 0.119273 | 0.207515 | -5.21135 |
| C4orf52   | -0.47068 | -0.15273 | -1.63745 | 0.11728  | 0.204854 | -5.21168 |
| USP39     | 0.163215 | -0.09622 | 1.637435 | 0.117284 | 0.204854 | -5.21171 |
| HSPA4     | -0.63146 | 0.912475 | -1.63668 | 0.117442 | 0.205104 | -5.21282 |
| TAAR1     | -0.29981 | 0.027231 | -1.63666 | 0.117448 | 0.205104 | -5.21286 |
| MMAB      | -0.37894 | 0.349805 | -1.63638 | 0.117506 | 0.205188 | -5.21327 |
| ZNF521    | -0.51911 | 0.19532  | -1.63615 | 0.117555 | 0.205236 | -5.21361 |
| FOXL2     | -0.4483  | 0.061718 | -1.6235  | 0.121994 | 0.211088 | -5.21374 |
| NINJ1     | 0.441645 | 0.053002 | 1.635872 | 0.117613 | 0.205319 | -5.21401 |
| SIVA1     | 0.36743  | -0.36639 | 1.635676 | 0.117654 | 0.205373 | -5.2143  |
| GDF6      | -0.53453 | 0.133671 | -1.63545 | 0.117701 | 0.205438 | -5.21463 |
| GGA2      | -0.55394 | 0.566507 | -1.63537 | 0.117718 | 0.205449 | -5.21475 |
| BTBD11    | 0.539094 | -0.20534 | 1.63515  | 0.117765 | 0.205512 | -5.21508 |
| CILP      | -0.5851  | 0.155697 | -1.63503 | 0.117791 | 0.205524 | -5.21526 |
| GORASP2   | 0.244264 | -0.18998 | 1.634991 | 0.117799 | 0.205524 | -5.21531 |
| IFNA5     | -0.28334 | 0.107922 | -1.63497 | 0.117803 | 0.205524 | -5.21535 |
| EIF3I     | -0.30424 | 0.054632 | -1.63449 | 0.117904 | 0.205667 | -5.21605 |
| DEM1      | -0.36945 | 0.144246 | -1.63448 | 0.117906 | 0.205667 | -5.21607 |
| CCL14     | 0.355405 | -0.13828 | 1.634281 | 0.117949 | 0.20571  | -5.21636 |
| NKPD1     | 0.217334 | -0.04453 | 1.634264 | 0.117952 | 0.20571  | -5.21639 |
| ZEB1      | 0.956075 | -0.48412 | 1.48051  | 0.164796 | 0.266834 | -5.21678 |
| NRN1L     | -0.21237 | 0.532021 | -1.63397 | 0.118015 | 0.205793 | -5.21682 |
| CCDC57    | -0.64844 | 0.758007 | -1.63389 | 0.118031 | 0.205793 | -5.21694 |
| CCND2     | -0.59762 | 0.710927 | -1.63357 | 0.118099 | 0.205893 | -5.21741 |
| GABRA5    | 0.413618 | -0.28792 | 1.633087 | 0.118201 | 0.206053 | -5.21812 |
| EPRS      | 0.342089 | -0.2386  | 1.632931 | 0.118234 | 0.206092 | -5.21835 |
| SLC25A44  | -0.45399 | 0.403629 | -1.6327  | 0.118283 | 0.206159 | -5.21869 |
| PSMD3     | -0.24824 | 0.258971 | -1.63259 | 0.118305 | 0.206179 | -5.21885 |
| GNPTG     | -0.25003 | -0.03838 | -1.63247 | 0.118331 | 0.206207 | -5.21903 |
| SNAPC1    | -0.68601 | 0.21276  | -1.63229 | 0.118371 | 0.20623  | -5.2193  |
| MT1X      | 0.667085 | -0.12137 | 1.632267 | 0.118375 | 0.20623  | -5.21933 |
| VASP      | -0.46336 | 0.487701 | -1.63226 | 0.118377 | 0.20623  | -5.21934 |

|           |          |          |          |          |          |          |
|-----------|----------|----------|----------|----------|----------|----------|
| LOC285740 | -0.46262 | 0.059948 | -1.63185 | 0.118463 | 0.206362 | -5.21994 |
| KIAA1143  | -0.46981 | -0.15114 | -1.63166 | 0.118504 | 0.206398 | -5.22023 |
| LOC728034 | -0.59007 | 0.161998 | -1.61818 | 0.123143 | 0.212763 | -5.22148 |
| LOC100506 | 0.396969 | 0.081748 | 1.624972 | 0.120758 | 0.20943  | -5.22156 |
| TMED9     | -0.34981 | -0.00357 | -1.63055 | 0.118739 | 0.206775 | -5.22186 |
| LOC389493 | -0.57777 | -0.14753 | -1.63053 | 0.118744 | 0.206775 | -5.2219  |
| OPTC      | 0.362183 | -0.17797 | 1.630487 | 0.118753 | 0.206775 | -5.22195 |
| LOC100507 | 0.877459 | -0.82893 | 1.630332 | 0.118785 | 0.206814 | -5.22218 |
| ZRANB1    | -0.4416  | 0.133419 | -1.63013 | 0.118828 | 0.20687  | -5.22248 |
| TMSB15A   | -1.14553 | 0.258984 | -1.58621 | 0.131262 | 0.223337 | -5.22248 |
| KIF9      | -0.23612 | 0.20132  | -1.62936 | 0.118993 | 0.20712  | -5.22362 |
| KANSL2    | -0.62635 | 0.298755 | -1.59654 | 0.126984 | 0.217741 | -5.22448 |
| ADCY2     | -0.30586 | 0.037142 | -1.6286  | 0.119153 | 0.207374 | -5.22472 |
| PAX4      | 0.325016 | -0.31498 | 1.628495 | 0.119177 | 0.20738  | -5.22489 |
| RETNLB    | 0.275618 | -0.1981  | 1.628458 | 0.119185 | 0.20738  | -5.22494 |
| ADIG      | 0.551527 | 0.041877 | 1.622044 | 0.121388 | 0.210279 | -5.22584 |
| ENPP3     | 0.59256  | -0.38511 | 1.583681 | 0.131837 | 0.224062 | -5.22607 |
| SPERT     | 0.325702 | -0.07781 | 1.627145 | 0.119465 | 0.207816 | -5.22687 |
| LYPD3     | -0.49702 | 0.775074 | -1.62713 | 0.119467 | 0.207816 | -5.22689 |
| PSMB9     | -0.4028  | 0.428564 | -1.62707 | 0.11948  | 0.20782  | -5.22698 |
| PPIAL4A   | -0.27188 | 0.427933 | -1.62675 | 0.119549 | 0.207908 | -5.22745 |
| GPR61     | 0.181299 | -0.01011 | 1.626736 | 0.119552 | 0.207908 | -5.22747 |
| YPEL3     | 0.406619 | 0.132731 | 1.626569 | 0.119588 | 0.207952 | -5.22772 |
| TTL       | -0.30535 | 0.284536 | -1.62652 | 0.119598 | 0.207952 | -5.22779 |
| CAPN13    | -0.35829 | 0.043714 | -1.62646 | 0.119612 | 0.207957 | -5.22788 |
| C14orf178 | -0.44276 | 0.184671 | -1.62637 | 0.119631 | 0.207971 | -5.22801 |
| LOC100506 | 0.398198 | -0.29327 | 1.626279 | 0.11965  | 0.207986 | -5.22814 |
| PPP1R13B  | -0.38742 | 0.633434 | -1.62562 | 0.11979  | 0.208211 | -5.22911 |
| LOC100293 | -0.54893 | 0.106294 | -1.53607 | 0.14553  | 0.24204  | -5.22938 |
| HS3ST1    | -0.63853 | 0.773607 | -1.62541 | 0.119835 | 0.208263 | -5.22941 |
| SPATS2    | 0.298729 | 0.200254 | 1.625384 | 0.119841 | 0.208263 | -5.22946 |
| CA7       | 0.597811 | -0.19573 | 1.62509  | 0.119904 | 0.208355 | -5.22989 |
| PRKD3     | -0.2812  | 0.400413 | -1.62462 | 0.120005 | 0.208474 | -5.23058 |
| WHAMMP    | 0.166505 | -0.037   | 1.611834 | 0.124524 | 0.214423 | -5.23067 |
| KCNS2     | -0.44243 | -0.03629 | -1.60351 | 0.127383 | 0.218232 | -5.23072 |
| LARP4     | -0.42041 | 0.426543 | -1.62445 | 0.120042 | 0.20852  | -5.23083 |
| IFNE      | 0.683836 | -0.05065 | 1.623908 | 0.120158 | 0.208702 | -5.23163 |
| ZNF516    | -0.84927 | 0.4211   | -1.62386 | 0.120169 | 0.208703 | -5.2317  |
| CEP57     | 0.349732 | -0.46657 | 1.623663 | 0.12021  | 0.208757 | -5.23199 |
| ADORA3    | 0.465242 | -0.49882 | 1.622944 | 0.120365 | 0.208995 | -5.23304 |
| TNFRSF10E | -0.32761 | 0.414969 | -1.62292 | 0.120369 | 0.208995 | -5.23307 |
| E2F3      | -0.48865 | -0.05361 | -1.62271 | 0.120415 | 0.209024 | -5.23339 |
| TUBG2     | -0.32428 | 0.503053 | -1.62269 | 0.12042  | 0.209024 | -5.23342 |
| PHF20L1   | -0.44566 | 0.036356 | -1.62265 | 0.120428 | 0.209024 | -5.23348 |
| SIGMAR1   | -0.36545 | 0.564639 | -1.62258 | 0.120443 | 0.209032 | -5.23358 |
| REV1      | -0.48303 | 0.372883 | -1.61651 | 0.122584 | 0.211959 | -5.23391 |
| TCF20     | 0.36263  | 0.090085 | 1.622113 | 0.120543 | 0.209187 | -5.23426 |

|           |          |          |          |          |          |          |
|-----------|----------|----------|----------|----------|----------|----------|
| PLAUR     | -0.45131 | 0.425648 | -1.6218  | 0.120611 | 0.209285 | -5.23472 |
| CYP4B1    | 0.613891 | -0.31013 | 1.615917 | 0.122713 | 0.212124 | -5.23477 |
| FJX1      | -0.47346 | 0.061214 | -1.61585 | 0.122727 | 0.21213  | -5.23487 |
| BVES      | 0.377801 | -0.40798 | 1.621502 | 0.120675 | 0.209356 | -5.23516 |
| CSRN3     | -0.58128 | 0.283701 | -1.62146 | 0.120684 | 0.209356 | -5.23522 |
| SIRT3     | -0.29016 | 0.283239 | -1.62135 | 0.120708 | 0.209361 | -5.23538 |
| GPR144    | 0.29667  | -0.1793  | 1.621349 | 0.120708 | 0.209361 | -5.23538 |
| MAP3K10   | 0.32117  | 0.121917 | 1.62092  | 0.120801 | 0.209485 | -5.23601 |
| BDP1      | -0.47189 | 0.438265 | -1.62076 | 0.120834 | 0.209524 | -5.23624 |
| NME4      | 0.42707  | 0.226018 | 1.62038  | 0.120917 | 0.20965  | -5.2368  |
| GPN3      | -0.71626 | 0.183194 | -1.61387 | 0.123158 | 0.212763 | -5.23775 |
| SPATA6    | -0.34477 | 0.122215 | -1.61958 | 0.12109  | 0.20993  | -5.23797 |
| TADA2A    | -0.40039 | 0.52147  | -1.61947 | 0.121113 | 0.209938 | -5.23813 |
| RPL28     | -0.44226 | 0.570309 | -1.61946 | 0.121115 | 0.209938 | -5.23815 |
| EBLN2     | -0.42424 | 0.140587 | -1.61909 | 0.121195 | 0.210057 | -5.23869 |
| CPSF1     | -0.34978 | 0.408103 | -1.61893 | 0.121231 | 0.210092 | -5.23893 |
| WDR88     | 0.586229 | -0.10593 | 1.618901 | 0.121236 | 0.210092 | -5.23897 |
| USHBP1    | 0.280028 | -0.26408 | 1.566794 | 0.136889 | 0.230519 | -5.23898 |
| NACAD     | 0.293194 | -0.1035  | 1.580923 | 0.131438 | 0.22357  | -5.2391  |
| C18orf57  | -0.3699  | 0.080134 | -1.61865 | 0.12129  | 0.210167 | -5.23933 |
| SF3B3     | 0.45583  | 0.070654 | 1.618321 | 0.121362 | 0.21027  | -5.23982 |
| PSMD2     | -0.30267 | 0.139155 | -1.61828 | 0.121371 | 0.21027  | -5.23988 |
| RORC      | 0.197347 | -0.03947 | 1.618014 | 0.121429 | 0.210315 | -5.24027 |
| TNFSF4    | 0.601296 | -0.55136 | 1.617969 | 0.121438 | 0.210315 | -5.24034 |
| TMED3     | 0.264959 | -0.29028 | 1.61796  | 0.12144  | 0.210315 | -5.24035 |
| FYCO1     | 0.348824 | -0.13467 | 1.617555 | 0.121528 | 0.210429 | -5.24094 |
| BLCAP     | 0.263144 | -0.33543 | 1.617123 | 0.121622 | 0.210572 | -5.24157 |
| FAM149B1  | -0.35105 | 0.146673 | -1.61708 | 0.121632 | 0.210572 | -5.24164 |
| OR1A2     | -0.25221 | -0.09499 | -1.61667 | 0.121719 | 0.210705 | -5.24223 |
| MFAP5     | -0.20138 | 0.111495 | -1.61628 | 0.121805 | 0.210834 | -5.24281 |
| CA9       | 0.3282   | -0.30959 | 1.610379 | 0.123921 | 0.213741 | -5.24283 |
| RPA4      | -0.67187 | 0.296623 | -1.61005 | 0.123992 | 0.213789 | -5.2433  |
| FAM207A   | 0.349399 | -0.0293  | 1.615889 | 0.121889 | 0.210962 | -5.24338 |
| RHOXF2B   | 0.427723 | 0.066847 | 1.609941 | 0.124017 | 0.213794 | -5.24347 |
| N6AMT2    | -0.40501 | 0.508511 | -1.61554 | 0.121965 | 0.211073 | -5.24388 |
| C13orf30  | 0.282802 | -0.10886 | 1.609619 | 0.124087 | 0.213878 | -5.24393 |
| USP37     | -0.4574  | 0.055407 | -1.61543 | 0.121989 | 0.211088 | -5.24405 |
| LOC100506 | 0.758382 | -0.01395 | 1.577397 | 0.132247 | 0.224544 | -5.24411 |
| MKS1      | 0.393884 | 0.036025 | 1.614429 | 0.122207 | 0.211437 | -5.24551 |
| LOC728701 | -0.65275 | 0.302322 | -1.58179 | 0.130318 | 0.222078 | -5.24564 |
| C9orf69   | -0.21259 | 0.053509 | -1.61415 | 0.122267 | 0.211522 | -5.24592 |
| SIGLEC11  | 0.750287 | -0.52117 | 1.601135 | 0.126881 | 0.217622 | -5.24611 |
| ZAP70     | 0.63598  | -0.10512 | 1.613757 | 0.122353 | 0.211649 | -5.2465  |
| RUFY1     | -0.29316 | 0.392356 | -1.61372 | 0.122362 | 0.211649 | -5.24656 |
| COPS6     | -0.20871 | 0.230336 | -1.61345 | 0.122419 | 0.21173  | -5.24694 |
| P4HTM     | 0.301439 | -0.02069 | 1.613319 | 0.122449 | 0.211762 | -5.24714 |
| SEMA4F    | 0.426411 | 0.090719 | 1.613238 | 0.122466 | 0.211774 | -5.24725 |

|           |          |          |          |          |          |          |
|-----------|----------|----------|----------|----------|----------|----------|
| MYH6      | 0.476423 | -0.38245 | 1.600231 | 0.127082 | 0.217844 | -5.24741 |
| PAGE1     | 0.605077 | -0.05054 | 1.606953 | 0.124673 | 0.214605 | -5.2478  |
| PRDM10    | -0.38229 | 0.16784  | -1.61228 | 0.122675 | 0.212087 | -5.24865 |
| CDRT1     | -0.37816 | 0.125995 | -1.61226 | 0.12268  | 0.212087 | -5.24869 |
| DPY19L2P3 | -0.55615 | -0.00316 | -1.61179 | 0.122782 | 0.212208 | -5.24937 |
| CHMP2B    | -0.12958 | 0.017831 | -1.57909 | 0.130937 | 0.22288  | -5.2495  |
| SPIN4     | -0.4396  | 0.076533 | -1.60505 | 0.125094 | 0.215158 | -5.25057 |
| LOC100127 | 0.598509 | -0.08976 | 1.610875 | 0.122983 | 0.212535 | -5.2507  |
| ATXN7L1   | -0.28193 | 0.301126 | -1.61018 | 0.123134 | 0.212763 | -5.25171 |
| OSGIN1    | -0.36803 | 0.529074 | -1.61008 | 0.123157 | 0.212763 | -5.25186 |
| TLE2      | 0.763239 | -0.09081 | 1.609867 | 0.123204 | 0.212823 | -5.25218 |
| STYK1     | 0.406844 | -0.27143 | 1.609696 | 0.123241 | 0.212869 | -5.25242 |
| DNHD1     | 0.263111 | -0.05086 | 1.609095 | 0.123373 | 0.213062 | -5.2533  |
| LGALS4    | 0.197221 | -0.02488 | 1.609089 | 0.123374 | 0.213062 | -5.25331 |
| DEFA3     | 1.867162 | -1.05375 | 1.608432 | 0.123519 | 0.213292 | -5.25427 |
| GATC      | -0.2297  | 0.379882 | -1.60826 | 0.123555 | 0.213324 | -5.25451 |
| HADHB     | -0.30789 | -0.18433 | -1.60818 | 0.123574 | 0.213324 | -5.25463 |
| WDYHV1    | -0.53408 | 0.114936 | -1.60815 | 0.123581 | 0.213324 | -5.25468 |
| HGSNAT    | -0.59677 | 0.762469 | -1.60813 | 0.123584 | 0.213324 | -5.2547  |
| FZD7      | -0.34735 | 0.077849 | -1.6081  | 0.123592 | 0.213324 | -5.25475 |
| TRAF3IP1  | 0.362396 | -0.46728 | 1.607988 | 0.123616 | 0.213347 | -5.25491 |
| NPEPPS    | -0.43151 | 0.33118  | -1.60785 | 0.123646 | 0.213361 | -5.25511 |
| HLA-DRB6  | 0.548229 | -0.3305  | 1.607853 | 0.123646 | 0.213361 | -5.25511 |
| EDC3      | -0.22818 | 0.237707 | -1.60771 | 0.123677 | 0.21338  | -5.25532 |
| ZNF20     | -0.67469 | 0.49763  | -1.6077  | 0.123679 | 0.21338  | -5.25533 |
| XG        | 0.766004 | -0.22523 | 0.878232 | 0.4095   | 0.534845 | -5.25545 |
| ISCU      | -0.2268  | 0.399692 | -1.60759 | 0.123703 | 0.213404 | -5.25549 |
| C19orf48  | 0.358573 | -0.14283 | 1.606898 | 0.123856 | 0.213648 | -5.2565  |
| IQUB      | 0.229237 | -0.10499 | 1.60094  | 0.126003 | 0.216457 | -5.25651 |
| MC3R      | -0.2027  | -0.01026 | -1.60079 | 0.126036 | 0.216457 | -5.25673 |
| ARMC2     | -0.67902 | 0.526375 | -1.60655 | 0.123934 | 0.213745 | -5.25702 |
| MAP3K13   | -0.36113 | 0.115868 | -1.6063  | 0.123987 | 0.213789 | -5.25737 |
| SNRNP40   | -0.37297 | 0.301223 | -1.6063  | 0.123989 | 0.213789 | -5.25738 |
| MYO7B     | -0.44623 | 0.632341 | -1.60619 | 0.124013 | 0.213794 | -5.25754 |
| ABCB9     | -0.48522 | 0.788218 | -1.60604 | 0.124045 | 0.213824 | -5.25775 |
| ADH1B     | 0.525153 | -0.43783 | 1.59275  | 0.128755 | 0.219969 | -5.25816 |
| FAU       | 0.46112  | -0.37913 | 1.60558  | 0.124146 | 0.213937 | -5.25842 |
| VCY       | 0.285913 | -0.24634 | 1.605545 | 0.124154 | 0.213937 | -5.25847 |
| TMEM57    | -0.25209 | 0.428813 | -1.60502 | 0.12427  | 0.214116 | -5.25923 |
| IRF3      | 0.214259 | 0.178886 | 1.604968 | 0.124282 | 0.214116 | -5.25931 |
| MIS12     | -0.39134 | 0.110834 | -1.60492 | 0.124291 | 0.214116 | -5.25938 |
| PAGE4     | 0.561358 | -0.4286  | 1.559911 | 0.137348 | 0.231143 | -5.25959 |
| GBP5      | -0.98758 | 0.628135 | -1.60469 | 0.124343 | 0.214187 | -5.25972 |
| SHPRH     | -0.6858  | 0.662321 | -1.60459 | 0.124364 | 0.214205 | -5.25986 |
| TBC1D29   | -0.22298 | -0.1517  | -1.60451 | 0.124384 | 0.214219 | -5.25998 |
| TMEM119   | -0.74274 | 0.671255 | -1.60397 | 0.124502 | 0.214404 | -5.26076 |
| LRPPRC    | 0.513578 | -0.38152 | 1.603494 | 0.124607 | 0.214548 | -5.26146 |

|          |          |          |          |          |          |          |
|----------|----------|----------|----------|----------|----------|----------|
| JPH3     | 0.282342 | -0.20144 | 1.603245 | 0.124662 | 0.214605 | -5.26182 |
| SRR      | -0.52317 | 0.505691 | -1.60313 | 0.124688 | 0.214611 | -5.26198 |
| CKS2     | -0.72452 | -0.03935 | -1.60296 | 0.124726 | 0.214658 | -5.26223 |
| B4GALNT2 | 0.359672 | -0.22759 | 1.596941 | 0.126894 | 0.217625 | -5.26229 |
| IFT52    | 0.236747 | -0.22021 | 1.602727 | 0.124777 | 0.214709 | -5.26257 |
| BRD2     | -0.60442 | 0.772559 | -1.60233 | 0.124866 | 0.214842 | -5.26315 |
| ROS1     | 0.357565 | -0.28067 | 1.569226 | 0.133216 | 0.225741 | -5.26355 |
| ZNF32    | -0.58763 | 0.327011 | -1.60161 | 0.125024 | 0.215077 | -5.26419 |
| SARS     | -0.22622 | 0.310758 | -1.60161 | 0.125024 | 0.215077 | -5.26419 |
| BCRP2    | -0.303   | 0.338951 | -1.60133 | 0.125087 | 0.215158 | -5.2646  |
| SORBS2   | 0.657135 | -0.24955 | 1.474232 | 0.159985 | 0.260795 | -5.26475 |
| KDM4D    | -0.67267 | 0.458188 | -1.60109 | 0.125141 | 0.215221 | -5.26495 |
| HOXB3    | -0.38514 | 0.513717 | -1.60046 | 0.12528  | 0.215441 | -5.26586 |
| PPP1R15B | -0.47385 | 0.190061 | -1.59982 | 0.125422 | 0.215666 | -5.26679 |
| NRD1     | -0.36861 | 0.28877  | -1.5997  | 0.125449 | 0.215684 | -5.26696 |
| CPXM2    | -0.55286 | -0.07789 | -1.59368 | 0.127624 | 0.218532 | -5.26699 |
| C10orf2  | -0.53042 | 0.647007 | -1.59945 | 0.125505 | 0.215752 | -5.26733 |
| RTN4RL1  | 0.470409 | 0.135638 | 1.599121 | 0.125578 | 0.21586  | -5.26781 |
| AKAP11   | -0.64249 | 0.278763 | -1.59873 | 0.125665 | 0.21599  | -5.26837 |
| PCDHB15  | -0.32231 | 0.076839 | -1.59853 | 0.125709 | 0.216046 | -5.26866 |
| DNASE1   | -0.55943 | 0.57754  | -1.59818 | 0.125788 | 0.216163 | -5.26917 |
| SRP68    | -0.33334 | 0.270012 | -1.59772 | 0.12589  | 0.21632  | -5.26984 |
| HMG20A   | -0.56574 | 0.469788 | -1.59737 | 0.125969 | 0.216436 | -5.27035 |
| GAB1     | -0.6857  | 0.367012 | -1.44922 | 0.171212 | 0.274752 | -5.27051 |
| VPS37B   | -0.31405 | 0.395242 | -1.59718 | 0.126011 | 0.216457 | -5.27062 |
| MC2R     | 0.331972 | -0.22254 | 1.59708  | 0.126034 | 0.216457 | -5.27077 |
| NCKAP5L  | -0.30875 | 0.189121 | -1.59708 | 0.126034 | 0.216457 | -5.27077 |
| CSRP3    | -0.31356 | 0.120501 | -1.59074 | 0.128286 | 0.219403 | -5.27122 |
| RDH14    | -0.67887 | 0.149789 | -1.59669 | 0.126121 | 0.216583 | -5.27133 |
| NME3     | 0.305992 | -0.19008 | 1.59637  | 0.126192 | 0.216687 | -5.2718  |
| PTX3     | -0.75204 | 0.559594 | -1.59627 | 0.126214 | 0.216705 | -5.27194 |
| NUB1     | -0.4089  | 0.446876 | -1.59616 | 0.126239 | 0.216728 | -5.2721  |
| IRF6     | -0.5641  | 0.046983 | -1.59011 | 0.12843  | 0.219605 | -5.27214 |
| SHB      | -0.36049 | 0.482763 | -1.59564 | 0.126356 | 0.21691  | -5.27286 |
| MCHR2    | -0.39323 | -0.03878 | -1.59549 | 0.12639  | 0.21695  | -5.27308 |
| MFSD1    | -0.44564 | -0.24919 | -1.59527 | 0.126439 | 0.217015 | -5.27339 |
| UNC13D   | 0.303715 | 0.025181 | 1.595129 | 0.12647  | 0.21705  | -5.2736  |
| HEATR5B  | 0.302632 | -0.08093 | 1.589017 | 0.128676 | 0.21991  | -5.27371 |
| IL22RA2  | -0.30214 | 0.061941 | -1.59498 | 0.126504 | 0.217088 | -5.27381 |
| TGM4     | 0.31098  | -0.05924 | 1.588786 | 0.128728 | 0.219961 | -5.27404 |
| RNF152   | -0.52238 | 0.216944 | -1.59453 | 0.126606 | 0.217244 | -5.27447 |
| RAD23B   | -0.28907 | 0.350291 | -1.59447 | 0.126619 | 0.217248 | -5.27456 |
| BCKDHA   | 0.302457 | -0.1981  | 1.594277 | 0.126661 | 0.217302 | -5.27483 |
| MCF2     | -0.4908  | 0.166505 | -1.58042 | 0.131553 | 0.223657 | -5.27579 |
| CAPNS1   | -0.31198 | 0.369355 | -1.59351 | 0.126833 | 0.217577 | -5.27594 |
| PDIA6    | -0.29598 | 0.327065 | -1.59337 | 0.126864 | 0.217612 | -5.27614 |
| KRT24    | 0.418334 | -0.54928 | 1.51486  | 0.148325 | 0.245466 | -5.27654 |



|           |          |          |          |          |          |          |
|-----------|----------|----------|----------|----------|----------|----------|
| SLC4A8    | 0.320533 | -0.10105 | 1.592953 | 0.126959 | 0.217716 | -5.27675 |
| LSM14A    | 0.249922 | -0.45987 | 1.592405 | 0.127082 | 0.217844 | -5.27754 |
| SENP7     | -0.76607 | 0.342767 | -1.59238 | 0.127088 | 0.217844 | -5.27758 |
| GALP      | -0.50698 | 0.03713  | -1.59186 | 0.127204 | 0.218022 | -5.27832 |
| SGMS2     | -0.51452 | 0.249864 | -1.59158 | 0.127268 | 0.218112 | -5.27873 |
| PCM1      | -0.34768 | 0.024941 | -1.59145 | 0.127297 | 0.218144 | -5.27892 |
| PDGFRA    | -0.45885 | 0.041105 | -1.58531 | 0.129515 | 0.22096  | -5.27903 |
| GORAB     | -0.59054 | 0.071924 | -1.59127 | 0.127338 | 0.218195 | -5.27918 |
| SEC14L3   | -0.53261 | -0.09313 | -1.59116 | 0.127363 | 0.218218 | -5.27934 |
| HIST1H3J  | -0.56663 | 0.484207 | -1.59102 | 0.127393 | 0.218232 | -5.27953 |
| NDUFA11   | 0.24645  | -0.21178 | 1.590957 | 0.127408 | 0.218235 | -5.27963 |
| ALDH3B2   | 0.290911 | -0.18373 | 1.590918 | 0.127417 | 0.218235 | -5.27969 |
| LOC100507 | -0.64295 | 0.246896 | -1.57768 | 0.132182 | 0.224477 | -5.2797  |
| TMED10P1  | 0.265544 | -0.16828 | 1.577471 | 0.13223  | 0.224535 | -5.28    |
| UBR5      | -0.82117 | 0.465473 | -1.58427 | 0.129752 | 0.221209 | -5.28052 |
| C9orf84   | 0.60004  | -0.11323 | 1.59028  | 0.127561 | 0.218462 | -5.28061 |
| PACSIN1   | 0.662929 | -0.04331 | 1.590081 | 0.127606 | 0.21852  | -5.2809  |
| AHSA1     | -0.42517 | 0.566873 | -1.58983 | 0.127663 | 0.218579 | -5.28126 |
| DLGAP2    | -0.44133 | 0.234747 | -1.58965 | 0.127704 | 0.218631 | -5.28153 |
| LOC440331 | -0.21423 | 0.07631  | -1.58952 | 0.127732 | 0.218647 | -5.28171 |
| TNFSF14   | 0.364424 | 0.014375 | 1.589504 | 0.127736 | 0.218647 | -5.28173 |
| C16orf89  | 0.58489  | -0.24673 | 1.556043 | 0.136315 | 0.229779 | -5.28223 |
| GLT8D2    | -0.48112 | 0.133365 | -1.58308 | 0.130024 | 0.221616 | -5.28223 |
| RASSF7    | 0.373454 | -0.09831 | 1.589029 | 0.127843 | 0.218812 | -5.28242 |
| UQCRC2    | -0.29809 | 0.302155 | -1.58879 | 0.127897 | 0.218852 | -5.28276 |
| WDR61     | -0.33419 | 0.009007 | -1.58878 | 0.1279   | 0.218852 | -5.28278 |
| DLX4      | 0.535843 | -0.55051 | 1.305604 | 0.212936 | 0.325501 | -5.28284 |
| KRT23     | 0.751443 | 0.260367 | 1.588473 | 0.127969 | 0.218944 | -5.28322 |
| PRPF4     | -0.21118 | 0.05465  | -1.58844 | 0.127976 | 0.218944 | -5.28327 |
| PPME1     | -0.58696 | 0.927186 | -1.58781 | 0.12812  | 0.21917  | -5.28418 |
| RBM12     | -0.57099 | 0.009424 | -1.54885 | 0.138951 | 0.23334  | -5.2844  |
| ZNF672    | 0.209078 | -0.07032 | 1.587646 | 0.128156 | 0.219214 | -5.28441 |
| ACBD4     | -0.33592 | 0.511859 | -1.58706 | 0.12829  | 0.219403 | -5.28526 |
| ARL2BP    | 0.403454 | -0.3084  | 1.580883 | 0.130526 | 0.222374 | -5.28538 |
| LOC100271 | -0.39053 | -0.08136 | -1.54798 | 0.139159 | 0.233648 | -5.28561 |
| AKR7A3    | 0.361709 | 0.091381 | 1.586479 | 0.128421 | 0.219605 | -5.2861  |
| CLASP1    | -0.44588 | 0.152708 | -1.5731  | 0.133239 | 0.225759 | -5.28622 |
| MPV17L2   | -0.23133 | 0.189424 | -1.58614 | 0.128498 | 0.219699 | -5.28659 |
| TMEM93    | -0.30704 | 0.004934 | -1.5861  | 0.128507 | 0.219699 | -5.28664 |
| KRT18     | -0.34128 | 0.161027 | -1.58575 | 0.128586 | 0.219814 | -5.28714 |
| GUCY2C    | 0.229891 | -0.10631 | 1.585704 | 0.128597 | 0.219814 | -5.28721 |
| SDR16C5   | 0.320807 | -0.16442 | 1.579545 | 0.130832 | 0.222747 | -5.2873  |
| SATB1     | 0.416397 | -0.23283 | 1.585567 | 0.128628 | 0.219848 | -5.28741 |
| SPHK1     | 0.359991 | 0.177549 | 1.585293 | 0.128691 | 0.219917 | -5.28781 |
| THAP7-AS1 | 0.76839  | 0.044164 | 1.551919 | 0.137296 | 0.231076 | -5.28805 |
| ARFIP1    | 0.34734  | -0.56318 | 1.585072 | 0.128741 | 0.219964 | -5.28813 |
| ICT1      | -0.35927 | 0.275372 | -1.58496 | 0.128767 | 0.21997  | -5.28829 |

|           |          |          |          |          |          |          |
|-----------|----------|----------|----------|----------|----------|----------|
| GTPBP1    | -0.34819 | 0.224654 | -1.58477 | 0.128809 | 0.220023 | -5.28856 |
| PSEN2     | -0.33835 | 0.429342 | -1.58454 | 0.128862 | 0.220095 | -5.2889  |
| UTP14A    | -0.46074 | 0.636864 | -1.58445 | 0.128882 | 0.22011  | -5.28902 |
| C4orf22   | 0.613104 | -0.67313 | 1.545171 | 0.139835 | 0.234562 | -5.28954 |
| IFITM2    | -0.48402 | 0.485553 | -1.58407 | 0.128969 | 0.220236 | -5.28957 |
| WARS      | -0.68264 | 0.379331 | -1.58403 | 0.128978 | 0.220236 | -5.28963 |
| LHX6      | -0.266   | 0.116295 | -1.57044 | 0.133854 | 0.226605 | -5.28998 |
| CARKD     | -0.25585 | 0.032004 | -1.58343 | 0.129114 | 0.220447 | -5.29048 |
| RPRD1A    | -0.73052 | 0.390872 | -1.58321 | 0.129165 | 0.220498 | -5.29081 |
| MYO16     | -0.54708 | 0.045977 | -1.58291 | 0.129233 | 0.220593 | -5.29124 |
| CDH1      | 0.492344 | -0.39216 | 1.582823 | 0.129253 | 0.220609 | -5.29137 |
| FLJ41350  | -0.51372 | 0.227964 | -1.58263 | 0.129298 | 0.220665 | -5.29165 |
| OCRL      | 0.455731 | -0.27493 | 1.581948 | 0.129453 | 0.220911 | -5.29262 |
| LOC641746 | -0.46441 | 0.242621 | -1.54853 | 0.138108 | 0.232182 | -5.29282 |
| RPS4X     | 0.603659 | -0.0545  | 1.5817   | 0.12951  | 0.22096  | -5.29298 |
| LRRN3     | 1.003435 | -0.47335 | 1.581677 | 0.129515 | 0.22096  | -5.29301 |
| PEX11A    | -0.37983 | 0.115867 | -1.57547 | 0.131769 | 0.223986 | -5.29313 |
| EP400     | -0.34304 | 0.48956  | -1.58145 | 0.129567 | 0.221016 | -5.29334 |
| ZNF84     | -0.60761 | 0.365392 | -1.58143 | 0.129571 | 0.221016 | -5.29337 |
| KIAA0020  | -0.44595 | 0.305798 | -1.58132 | 0.129596 | 0.22104  | -5.29353 |
| FAIM3     | -0.53201 | 0.888628 | -1.58117 | 0.12963  | 0.221062 | -5.29374 |
| CENPP     | -0.44287 | 0.210266 | -1.58117 | 0.129631 | 0.221062 | -5.29375 |
| KRT77     | 1.784805 | -0.56775 | 0.795189 | 0.463513 | 0.585676 | -5.29375 |
| PARD3B    | -0.61602 | 0.352077 | -1.57485 | 0.131912 | 0.224099 | -5.29401 |
| RANGAP1   | -0.48769 | 0.885662 | -1.58071 | 0.129735 | 0.221201 | -5.2944  |
| SPNS1     | 0.302533 | 0.076138 | 1.580099 | 0.129876 | 0.221402 | -5.29528 |
| RDBP      | -0.26387 | 0.269827 | -1.57968 | 0.129973 | 0.221548 | -5.29589 |
| C9orf128  | 0.570793 | -0.57639 | 1.450404 | 0.166429 | 0.268794 | -5.2962  |
| CALHM3    | 0.46141  | -0.15326 | 1.545811 | 0.138761 | 0.2331   | -5.29664 |
| FAM113B   | 0.661237 | -0.09874 | 1.579037 | 0.130119 | 0.221759 | -5.29681 |
| KRTAP3-2  | -0.27028 | -0.01553 | -1.57749 | 0.130474 | 0.222324 | -5.29903 |
| NEIL3     | 0.327912 | 0.008725 | 1.563961 | 0.135367 | 0.228595 | -5.29917 |
| PIM2      | 0.397127 | 0.123808 | 1.577361 | 0.130505 | 0.222357 | -5.29922 |
| RGPD6     | 0.305823 | -0.50691 | 1.554964 | 0.138519 | 0.232774 | -5.29956 |
| CCDC39    | -0.35027 | 0.139635 | -1.57704 | 0.130579 | 0.222446 | -5.29968 |
| LEO1      | -0.25392 | 0.255769 | -1.57682 | 0.130629 | 0.222511 | -5.29999 |
| TTC27     | 0.403011 | -0.31949 | 1.576542 | 0.130693 | 0.222589 | -5.30039 |
| UBN2      | -0.27102 | -0.25841 | -1.56297 | 0.135599 | 0.228927 | -5.30057 |
| SLC12A6   | -0.54363 | 0.401414 | -1.57623 | 0.130766 | 0.222671 | -5.30084 |
| GHRHR     | -0.40203 | 0.163952 | -1.57622 | 0.130768 | 0.222671 | -5.30086 |
| FAM54B    | -0.2106  | 0.127291 | -1.57592 | 0.130836 | 0.222747 | -5.30128 |
| CRTC3     | -0.45648 | 0.096314 | -1.57557 | 0.130917 | 0.222866 | -5.30179 |
| LOC728393 | -0.32374 | 0.495696 | -1.5754  | 0.130955 | 0.222892 | -5.30203 |
| DDX28     | 0.335768 | -0.17842 | 1.575122 | 0.131021 | 0.222984 | -5.30243 |
| S100Z     | -0.52258 | 0.356843 | -1.57494 | 0.131062 | 0.223035 | -5.30269 |
| SEMA7A    | 0.576687 | -0.24497 | 1.535291 | 0.142233 | 0.237649 | -5.30333 |
| ATG16L1   | -0.47388 | 0.34058  | -1.57445 | 0.131176 | 0.22321  | -5.3034  |

|           |          |          |          |          |          |          |
|-----------|----------|----------|----------|----------|----------|----------|
| TPRKB     | -0.5687  | 0.107133 | -1.56076 | 0.13612  | 0.22949  | -5.30369 |
| LCAT      | -0.2128  | 0.536204 | -1.57354 | 0.131386 | 0.223529 | -5.3047  |
| ZFHx4     | 0.387797 | -0.29523 | 1.567341 | 0.133656 | 0.226309 | -5.30472 |
| BANP      | -0.39845 | 0.767056 | -1.57337 | 0.131425 | 0.22357  | -5.30494 |
| OR1F2P    | 0.287008 | -0.22789 | 1.57324  | 0.131456 | 0.22357  | -5.30513 |
| TRMT1L    | -0.58604 | 0.091449 | -1.57322 | 0.13146  | 0.22357  | -5.30515 |
| CDCA4     | 0.297421 | -0.06816 | 1.573185 | 0.131468 | 0.22357  | -5.30521 |
| RHOC      | 0.402606 | 0.096676 | 1.57314  | 0.131479 | 0.22357  | -5.30527 |
| CCDC137   | -0.3412  | 0.374271 | -1.5729  | 0.131535 | 0.223646 | -5.30562 |
| DTX4      | -0.22703 | 0.222234 | -1.56639 | 0.133879 | 0.226628 | -5.30608 |
| LOC25541: | 0.411115 | -0.04649 | 1.565536 | 0.134078 | 0.226906 | -5.30729 |
| ZCCHC4    | -0.47692 | 0.430803 | -1.5717  | 0.131813 | 0.22404  | -5.30734 |
| HFM1      | 0.586254 | -0.0242  | 1.571421 | 0.131877 | 0.224099 | -5.30773 |
| TMEM109   | -0.49827 | 0.674268 | -1.5714  | 0.131882 | 0.224099 | -5.30776 |
| TSSK1B    | -0.30156 | 0.058219 | -1.57131 | 0.131903 | 0.224099 | -5.30789 |
| FBXO5     | -0.59425 | 0.44701  | -1.57125 | 0.131916 | 0.224099 | -5.30797 |
| C16orf95  | -0.39009 | 0.523935 | -1.57068 | 0.13205  | 0.224308 | -5.3088  |
| PGBD5     | 0.17715  | -0.03977 | 1.570477 | 0.132096 | 0.224367 | -5.30909 |
| LOC10065: | 0.436043 | -0.27452 | 1.536706 | 0.140968 | 0.23612  | -5.30941 |
| CIAPIN1   | -0.235   | 0.07896  | -1.5701  | 0.132184 | 0.224477 | -5.30963 |
| ZNF707    | -0.33266 | 0.47427  | -1.56978 | 0.132258 | 0.224544 | -5.31008 |
| B3GALNT2  | -0.40947 | 0.435278 | -1.56951 | 0.132322 | 0.224633 | -5.31047 |
| GUSBP4    | 0.454423 | -0.43389 | 1.555331 | 0.137404 | 0.231201 | -5.31135 |
| SPINK1    | 0.303615 | -0.30154 | 1.568752 | 0.132498 | 0.224893 | -5.31155 |
| PODN      | -0.29881 | 0.071119 | -1.56252 | 0.134785 | 0.227769 | -5.31157 |
| RBFOX1    | 0.643369 | -0.74861 | 1.346367 | 0.211596 | 0.32378  | -5.31185 |
| MAP3K6    | -0.34792 | 0.312864 | -1.56851 | 0.132554 | 0.224969 | -5.3119  |
| APEH      | -0.21674 | 0.209298 | -1.56834 | 0.132595 | 0.225018 | -5.31215 |
| OR52A1    | -0.20821 | -0.03528 | -1.55471 | 0.137551 | 0.231365 | -5.31222 |
| RCN1      | -0.49381 | 0.618158 | -1.56794 | 0.132686 | 0.225154 | -5.31271 |
| CDKN2D    | -0.32762 | 0.02678  | -1.56789 | 0.132699 | 0.225157 | -5.31279 |
| KIAA2022  | -0.33859 | 0.052924 | -1.56778 | 0.132724 | 0.22518  | -5.31294 |
| TMEM213   | 0.480007 | -0.8945  | 1.521432 | 0.146679 | 0.243426 | -5.31304 |
| DCST2     | 0.28715  | -0.2491  | 1.567606 | 0.132765 | 0.225229 | -5.31319 |
| CASP7     | -0.64727 | 0.692683 | -1.56135 | 0.135061 | 0.228177 | -5.31324 |
| ELP3      | -0.56871 | 0.675073 | -1.56735 | 0.132825 | 0.225311 | -5.31356 |
| ALKBH7    | 0.390382 | -0.32341 | 1.567238 | 0.132851 | 0.225336 | -5.31372 |
| HIST1H4A  | 0.244425 | -0.13178 | 1.567102 | 0.132883 | 0.225354 | -5.31391 |
| KIF4A     | -0.56248 | 0.59937  | -1.56709 | 0.132884 | 0.225354 | -5.31392 |
| METTLL18  | -0.40592 | 0.130991 | -1.56694 | 0.132921 | 0.225377 | -5.31415 |
| LOC20202: | -0.73213 | 0.727556 | -1.56683 | 0.132947 | 0.225401 | -5.3143  |
| NGF       | -0.26089 | 0.011462 | -1.56657 | 0.133007 | 0.225484 | -5.31467 |
| ATF7IP2   | 0.562733 | -0.1693  | 1.566449 | 0.133035 | 0.225512 | -5.31484 |
| ANGEL2    | -0.55712 | 0.306177 | -1.56638 | 0.133051 | 0.225519 | -5.31494 |
| TDRG1     | 0.24578  | -0.29058 | 1.566216 | 0.13309  | 0.225565 | -5.31518 |
| C1QTNF2   | 0.24438  | -0.42249 | 1.566005 | 0.133139 | 0.225629 | -5.31548 |
| FBF1      | 0.180687 | 0.020919 | 1.565393 | 0.133282 | 0.225804 | -5.31635 |

|           |          |          |          |          |          |          |
|-----------|----------|----------|----------|----------|----------|----------|
| HIF3A     | -0.29486 | 0.116943 | -1.56537 | 0.133288 | 0.225804 | -5.31639 |
| FBXO40    | 0.230757 | -0.20364 | 1.565152 | 0.133339 | 0.22587  | -5.3167  |
| GPC2      | 0.339241 | -0.26163 | 1.564982 | 0.133379 | 0.225918 | -5.31694 |
| DRD1      | 0.773571 | -0.33899 | 1.434345 | 0.170891 | 0.27426  | -5.31717 |
| DEPDC7    | 0.560939 | -0.24645 | 1.56474  | 0.133435 | 0.225994 | -5.31728 |
| ECM1      | -0.45201 | 0.639897 | -1.56466 | 0.133453 | 0.226005 | -5.31739 |
| BSG       | 0.569403 | 0.123247 | 1.563885 | 0.133636 | 0.226295 | -5.3185  |
| EPHA2     | 0.56132  | -0.29632 | 1.489042 | 0.153918 | 0.253094 | -5.31889 |
| FAM197Y2  | -0.39971 | 0.035542 | -1.56301 | 0.13384  | 0.226602 | -5.31975 |
| LOC100501 | 0.40973  | -0.66476 | 1.529116 | 0.142831 | 0.238475 | -5.32    |
| PIM1      | 0.316017 | -0.41481 | 1.562267 | 0.134016 | 0.226837 | -5.32081 |
| LAP3      | -0.66035 | 0.15155  | -1.56223 | 0.134025 | 0.226837 | -5.32087 |
| NAA25     | -0.39224 | -0.01363 | -1.55555 | 0.136432 | 0.229878 | -5.32145 |
| TPPP3     | 0.853442 | 0.338255 | 1.561668 | 0.134157 | 0.227001 | -5.32166 |
| TM4SF20   | 0.226029 | -0.07372 | 1.561667 | 0.134157 | 0.227001 | -5.32167 |
| ICMT      | -0.3228  | 0.209162 | -1.56158 | 0.134177 | 0.227016 | -5.32179 |
| ERCC5     | -0.23234 | 0.088582 | -1.56148 | 0.134202 | 0.227034 | -5.32194 |
| AFAP1-AS1 | -0.22809 | -0.10576 | -1.56144 | 0.134211 | 0.227034 | -5.32199 |
| TMEM179   | 0.250389 | -0.207   | 1.561216 | 0.134263 | 0.227102 | -5.32231 |
| FANCE     | 0.257872 | -0.08803 | 1.561164 | 0.134275 | 0.227103 | -5.32238 |
| DIS3L     | 0.330049 | -0.13576 | 1.561095 | 0.134292 | 0.227111 | -5.32248 |
| PTPMT1    | -0.41521 | 0.259014 | -1.5609  | 0.134339 | 0.227171 | -5.32277 |
| NLRC3     | 0.449744 | -0.16149 | 1.560777 | 0.134367 | 0.227199 | -5.32293 |
| UBC       | -0.29646 | 0.167441 | -1.56063 | 0.134402 | 0.22722  | -5.32315 |
| SLC44A2   | -0.41251 | 0.425018 | -1.56062 | 0.134403 | 0.22722  | -5.32315 |
| MSC       | -0.43387 | 0.292707 | -1.56055 | 0.134421 | 0.227231 | -5.32326 |
| CD69      | -0.77432 | -0.02036 | -1.55354 | 0.136909 | 0.230522 | -5.32429 |
| HTRA1     | 1.088748 | -0.23141 | 1.494415 | 0.15599  | 0.255686 | -5.32473 |
| TAS2R31   | 0.246405 | -0.26208 | 1.559368 | 0.134699 | 0.227682 | -5.32494 |
| C10orf88  | -0.44892 | 0.156812 | -1.55303 | 0.13703  | 0.230707 | -5.32501 |
| MANF      | 0.299702 | 0.033951 | 1.55929  | 0.134718 | 0.227694 | -5.32505 |
| OGFR      | 0.230724 | 0.006054 | 1.559072 | 0.134769 | 0.227761 | -5.32536 |
| NPR2      | 0.419651 | 0.037181 | 1.55855  | 0.134893 | 0.227931 | -5.3261  |
| LOC100137 | -0.33479 | 0.163066 | -1.55791 | 0.135043 | 0.228165 | -5.32701 |
| LOC100129 | -0.3458  | -0.17633 | -1.52399 | 0.1441   | 0.24017  | -5.32714 |
| KRT12     | -0.31065 | -0.04744 | -1.55756 | 0.135127 | 0.228261 | -5.32751 |
| CCDC92    | 0.378973 | 0.050669 | 1.557527 | 0.135135 | 0.228261 | -5.32756 |
| RAB23     | -0.30733 | 0.035263 | -1.52367 | 0.14418  | 0.240206 | -5.32758 |
| EVI2A     | -0.93507 | -0.49093 | -1.55728 | 0.135193 | 0.22834  | -5.32791 |
| TTY2      | -0.46598 | 0.320186 | -1.55691 | 0.135281 | 0.228468 | -5.32843 |
| TMEM72    | 0.235213 | -0.22306 | 1.556236 | 0.135441 | 0.228699 | -5.32939 |
| ESPNL     | 0.33329  | -0.09406 | 1.556095 | 0.135474 | 0.228736 | -5.32959 |
| PRKCZ     | 0.468383 | 0.046245 | 1.555448 | 0.135628 | 0.228956 | -5.33051 |
| LRIG2     | -0.28924 | 0.150265 | -1.55513 | 0.135704 | 0.229054 | -5.33097 |
| PHF14     | -0.42985 | 0.326423 | -1.55511 | 0.135709 | 0.229054 | -5.331   |
| HTR4      | 0.307042 | -0.30431 | 1.554796 | 0.135783 | 0.229158 | -5.33144 |
| CCDC167   | -0.4479  | 0.218492 | -1.55474 | 0.135795 | 0.229159 | -5.33151 |

|           |          |          |          |          |          |          |
|-----------|----------|----------|----------|----------|----------|----------|
| PMM2      | -0.43804 | 0.278783 | -1.55465 | 0.135818 | 0.229178 | -5.33165 |
| BLK       | -0.44166 | 0.688008 | -1.55442 | 0.135871 | 0.229248 | -5.33197 |
| NUFIP2    | -0.34265 | -0.19055 | -1.55423 | 0.135916 | 0.229276 | -5.33224 |
| ARAP1     | -0.29286 | 0.351462 | -1.55422 | 0.13592  | 0.229276 | -5.33226 |
| LOC100125 | -0.43274 | 0.455373 | -1.55421 | 0.135923 | 0.229276 | -5.33228 |
| EEF2K     | 0.409674 | 0.123875 | 1.554055 | 0.135959 | 0.229317 | -5.33249 |
| ANKRD9    | 0.653414 | 0.19955  | 1.553913 | 0.135993 | 0.229336 | -5.33269 |
| PRB2      | 0.200701 | -0.05595 | 1.553911 | 0.135993 | 0.229336 | -5.33269 |
| FAM92A1   | -0.51712 | 0.190466 | -1.5535  | 0.136092 | 0.229482 | -5.33328 |
| ZFYVE28   | 0.556392 | -0.02311 | 1.553402 | 0.136114 | 0.22949  | -5.33342 |
| LOC100506 | 0.499123 | -0.07998 | 1.477796 | 0.156876 | 0.256898 | -5.33409 |
| MT1H      | 0.57754  | -0.07155 | 1.552587 | 0.136309 | 0.229779 | -5.33457 |
| C17orf63  | -0.32122 | 0.337593 | -1.55246 | 0.13634  | 0.229797 | -5.33476 |
| CCDC140   | 0.742241 | -0.02241 | 1.552418 | 0.136349 | 0.229797 | -5.33481 |
| MAP2K5    | 0.304064 | -0.06092 | 1.552294 | 0.136379 | 0.229827 | -5.33499 |
| ZNF654    | -0.34434 | 0.042572 | -1.55224 | 0.136391 | 0.229828 | -5.33506 |
| ZNF527    | 0.417618 | -0.64793 | 1.517939 | 0.14561  | 0.242136 | -5.33553 |
| TRIM33    | 0.311129 | -0.3584  | 1.551797 | 0.136497 | 0.229968 | -5.33569 |
| KIAA1958  | -0.69964 | 0.416767 | -1.53785 | 0.141608 | 0.236949 | -5.33587 |
| MANBA     | -0.36481 | 0.170885 | -1.55144 | 0.136584 | 0.230094 | -5.33621 |
| LGR4      | 0.464625 | -0.39602 | 1.551298 | 0.136617 | 0.230129 | -5.3364  |
| KLHL34    | 0.394954 | -0.08561 | 1.55088  | 0.136716 | 0.230278 | -5.33699 |
| MGC16275  | -0.32332 | 0.422676 | -1.5507  | 0.136759 | 0.23033  | -5.33725 |
| DMRTC1    | 0.602583 | -0.6338  | 1.550135 | 0.136895 | 0.230519 | -5.33805 |
| CNTNAP2   | 0.484523 | -0.10198 | 1.543224 | 0.139385 | 0.233963 | -5.33884 |
| CHAMP1    | -0.31122 | 0.195638 | -1.5494  | 0.13707  | 0.230752 | -5.33909 |
| MACC1     | -0.4872  | 0.09745  | -1.54934 | 0.137086 | 0.230752 | -5.33918 |
| LIN37     | -0.20455 | 0.30596  | -1.54931 | 0.137092 | 0.230752 | -5.33922 |
| NMRAL1    | 0.426979 | -0.23295 | 1.548001 | 0.137406 | 0.231201 | -5.34107 |
| ASGR1     | 0.661888 | -0.09881 | 1.54765  | 0.137491 | 0.231318 | -5.34157 |
| ODF2      | 0.41958  | 0.107217 | 1.547595 | 0.137504 | 0.231318 | -5.34165 |
| ATG2A     | 0.247252 | 0.07148  | 1.547565 | 0.137511 | 0.231318 | -5.34169 |
| SMYD4     | 0.394774 | -0.17184 | 1.546489 | 0.13777  | 0.231714 | -5.34321 |
| ZNF850    | -0.33496 | -0.09402 | -1.53247 | 0.142925 | 0.238588 | -5.34338 |
| ANXA11    | -0.30302 | 0.392439 | -1.54619 | 0.137842 | 0.231815 | -5.34363 |
| NRAP      | -0.37671 | -0.26034 | -1.51192 | 0.147125 | 0.244053 | -5.34386 |
| GTF2B     | -0.3631  | 0.021191 | -1.5459  | 0.137911 | 0.231912 | -5.34404 |
| SERF1A    | 0.514118 | 0.192528 | 1.511737 | 0.147172 | 0.244111 | -5.34411 |
| FAM96A    | -0.41313 | -0.17931 | -1.54557 | 0.13799  | 0.232005 | -5.3445  |
| PNMT      | 0.365802 | 0.182909 | 1.544852 | 0.138164 | 0.232239 | -5.34552 |
| IDS       | -0.35922 | 0.322969 | -1.54485 | 0.138165 | 0.232239 | -5.34553 |
| LOC151306 | 0.347255 | -0.52929 | 1.510489 | 0.147488 | 0.244428 | -5.34584 |
| KIF25     | 0.456473 | -0.16169 | 1.544574 | 0.138231 | 0.23233  | -5.34592 |
| TMTC2     | 0.524532 | -0.27548 | 1.497253 | 0.152809 | 0.251481 | -5.34612 |
| CBY3      | 0.446673 | -0.11644 | 1.537319 | 0.140819 | 0.235951 | -5.34713 |
| IKZF5     | -0.82918 | 0.290392 | -1.54361 | 0.138463 | 0.2327   | -5.34727 |
| TBC1D23   | -0.30416 | 0.034629 | -1.54314 | 0.138578 | 0.232853 | -5.34794 |

|           |          |          |          |          |          |          |
|-----------|----------|----------|----------|----------|----------|----------|
| SNRPE     | 0.460078 | -0.85641 | 1.53649  | 0.141021 | 0.236168 | -5.34829 |
| RBM42     | 0.23157  | -0.00738 | 1.54269  | 0.138687 | 0.233015 | -5.34858 |
| DUSP16    | -0.25857 | 0.060959 | -1.54239 | 0.13876  | 0.2331   | -5.349   |
| SLITRK3   | 0.336054 | -0.07193 | 1.535743 | 0.141204 | 0.236413 | -5.34934 |
| SEMA3C    | -0.28976 | 0.17371  | -1.54186 | 0.138887 | 0.233274 | -5.34974 |
| PSMB4     | -0.21952 | -0.0604  | -1.54185 | 0.138891 | 0.233274 | -5.34977 |
| TMEM99    | 0.443769 | -0.23432 | 1.54181  | 0.1389   | 0.233274 | -5.34982 |
| C14orf183 | -0.65325 | 0.398885 | -1.53495 | 0.141397 | 0.236676 | -5.35045 |
| CAMK2B    | 0.23974  | 0.012635 | 1.50658  | 0.148481 | 0.245645 | -5.35123 |
| BOLA3     | -0.43632 | 0.277068 | -1.54079 | 0.139148 | 0.233648 | -5.35126 |
| COL19A1   | -0.35519 | 0.122194 | -1.54061 | 0.13919  | 0.233681 | -5.35151 |
| CD52      | 0.916253 | -0.92427 | 1.540213 | 0.139287 | 0.233824 | -5.35207 |
| COPS2     | -0.63047 | -0.58674 | -1.53977 | 0.139394 | 0.233963 | -5.35269 |
| INPP5B    | -0.30966 | 0.539827 | -1.5395  | 0.13946  | 0.234053 | -5.35307 |
| OTUD5     | -0.54858 | 0.979968 | -1.53937 | 0.139491 | 0.234086 | -5.35325 |
| RPL11     | 0.566651 | -0.44272 | 1.539226 | 0.139527 | 0.234126 | -5.35346 |
| C17orf104 | 0.538541 | -0.10771 | 1.539159 | 0.139543 | 0.234133 | -5.35355 |
| CAPZA3    | 0.417011 | -0.43389 | 1.538499 | 0.139704 | 0.234383 | -5.35448 |
| CUL2      | -0.22074 | 0.04436  | -1.53201 | 0.142117 | 0.237476 | -5.35456 |
| LINC00282 | -0.60181 | 0.885405 | -1.53838 | 0.139733 | 0.234412 | -5.35465 |
| IQCF6     | 0.341814 | -0.27264 | 1.523609 | 0.145112 | 0.241493 | -5.35569 |
| HCFC2     | -0.32671 | 0.046849 | -1.53764 | 0.139913 | 0.234654 | -5.3557  |
| SSTR4     | 0.255707 | -0.25514 | 1.53707  | 0.140052 | 0.234867 | -5.3565  |
| MST4      | -0.39985 | -0.23643 | -1.53674 | 0.140134 | 0.234983 | -5.35697 |
| PPCDC     | 0.288585 | -0.02344 | 1.536538 | 0.140182 | 0.235027 | -5.35724 |
| COL14A1   | 0.324252 | 0.028729 | 1.536531 | 0.140184 | 0.235027 | -5.35725 |
| GNG8      | 0.64053  | 0.01087  | 1.5364   | 0.140216 | 0.235061 | -5.35744 |
| USP5      | -0.43785 | 0.751811 | -1.53625 | 0.140252 | 0.235102 | -5.35765 |
| OAZ1      | -0.22276 | 0.117532 | -1.53572 | 0.140382 | 0.235299 | -5.35839 |
| STS       | -0.5371  | 0.605208 | -1.53541 | 0.140457 | 0.235405 | -5.35883 |
| FSCB      | 0.132764 | -0.0295  | 1.521245 | 0.145701 | 0.242225 | -5.35897 |
| AREG      | -0.95724 | 0.690107 | -1.51173 | 0.149115 | 0.24652  | -5.35953 |
| CNGA4     | -0.41674 | 0.35988  | -1.52841 | 0.143005 | 0.238675 | -5.3596  |
| MMP14     | -0.46275 | -0.45755 | -1.53475 | 0.14062  | 0.235657 | -5.35976 |
| PRB1      | -0.21478 | 0.042956 | -1.53396 | 0.140812 | 0.235951 | -5.36087 |
| ADPRH     | -0.64358 | 0.576562 | -1.53379 | 0.140853 | 0.235988 | -5.3611  |
| RHOF      | -0.48174 | 0.740905 | -1.53347 | 0.140934 | 0.236102 | -5.36156 |
| RIPK2     | -0.4121  | 0.106464 | -1.5334  | 0.140949 | 0.236108 | -5.36165 |
| THEM4     | -0.376   | 0.174217 | -1.53324 | 0.14099  | 0.236135 | -5.36188 |
| IQCB1     | -0.47727 | 0.152888 | -1.49861 | 0.150522 | 0.248498 | -5.36218 |
| LINC00340 | 0.305477 | -0.21635 | 1.53251  | 0.141168 | 0.236395 | -5.36291 |
| RPL30     | 0.710557 | -0.71412 | 1.532397 | 0.141196 | 0.236413 | -5.36307 |
| GRIP2     | -0.38469 | 0.059514 | -1.53219 | 0.141246 | 0.236464 | -5.36335 |
| SMS       | 0.232886 | -0.15505 | 1.532134 | 0.141261 | 0.236468 | -5.36343 |
| FAM43A    | -0.30645 | 0.758427 | -1.53137 | 0.141447 | 0.23674  | -5.3645  |
| LOC25517  | -0.46819 | -0.48305 | -1.53129 | 0.141467 | 0.236753 | -5.36461 |
| Mar-10    | 0.275029 | -0.24754 | 1.530932 | 0.141556 | 0.236882 | -5.36512 |

|           |          |          |          |          |          |          |
|-----------|----------|----------|----------|----------|----------|----------|
| EDN2      | -0.31862 | 0.008709 | -1.53066 | 0.141624 | 0.236955 | -5.36551 |
| AMDHD1    | 0.313216 | -0.0599  | 1.530523 | 0.141657 | 0.23699  | -5.36569 |
| PHPT1     | 0.345338 | 0.005461 | 1.530439 | 0.141678 | 0.237004 | -5.36581 |
| RBM26-AS  | 0.49844  | -0.41376 | 1.423949 | 0.176576 | 0.281747 | -5.36583 |
| KIAA1826  | 0.404718 | -0.21339 | 1.523835 | 0.144139 | 0.240178 | -5.36597 |
| FN3K      | 0.256489 | -0.11924 | 1.530312 | 0.141709 | 0.237037 | -5.36599 |
| HCST      | 0.340979 | -0.17419 | 1.530108 | 0.141759 | 0.237085 | -5.36628 |
| MANEA     | -0.43251 | 0.06572  | -1.53009 | 0.141763 | 0.237085 | -5.3663  |
| CXCR7     | 0.578703 | -0.41992 | 1.530046 | 0.141774 | 0.237085 | -5.36636 |
| PCDHB6    | -0.44555 | 0.089111 | -1.52999 | 0.141789 | 0.237089 | -5.36644 |
| C21orf59  | -0.26988 | 0.388326 | -1.52988 | 0.141814 | 0.237112 | -5.36659 |
| MYL2      | 0.220824 | -0.38563 | 1.523316 | 0.144267 | 0.240319 | -5.3667  |
| HVCN1     | 0.45806  | -0.02935 | 1.529358 | 0.141944 | 0.237307 | -5.36733 |
| LOC100129 | 0.301502 | -0.38358 | 1.529312 | 0.141955 | 0.237307 | -5.36739 |
| PHLDB3    | 0.433946 | 0.024063 | 1.529206 | 0.141982 | 0.237331 | -5.36754 |
| OR7C2     | -0.30107 | 0.043141 | -1.52878 | 0.142087 | 0.237472 | -5.36814 |
| BCO2      | -0.6289  | 0.322628 | -1.52876 | 0.142091 | 0.237472 | -5.36816 |
| TM2D3     | -0.33618 | -0.16559 | -1.52867 | 0.142113 | 0.237476 | -5.36829 |
| SRP19     | -0.64815 | 0.673067 | -1.52799 | 0.142281 | 0.237709 | -5.36924 |
| OTOR      | 0.677334 | 0.172963 | 1.527874 | 0.142311 | 0.237739 | -5.36941 |
| NLN       | -0.52145 | 0.353944 | -1.52767 | 0.142362 | 0.237804 | -5.3697  |
| CDH22     | 0.197081 | -0.21429 | 1.527479 | 0.142408 | 0.237861 | -5.36996 |
| CORO7     | 0.274525 | -0.05513 | 1.52675  | 0.142589 | 0.238142 | -5.37098 |
| GH1       | -0.38976 | 0.231282 | -1.52661 | 0.142624 | 0.23818  | -5.37118 |
| GPR176    | 0.274306 | -0.17362 | 1.526471 | 0.142658 | 0.238217 | -5.37137 |
| ANO6      | 0.60464  | -0.08873 | 1.52575  | 0.142837 | 0.238475 | -5.37238 |
| IL2       | -0.31747 | 0.119107 | -1.5251  | 0.142997 | 0.238675 | -5.37329 |
| HSPB7     | 0.371047 | -0.21701 | 1.524704 | 0.143096 | 0.238806 | -5.37384 |
| MRPL40    | -0.40349 | 0.233035 | -1.52465 | 0.143109 | 0.238807 | -5.37392 |
| USE1      | -0.28879 | 0.410382 | -1.52456 | 0.143131 | 0.238824 | -5.37404 |
| LGALSL    | 0.477983 | -0.0443  | 1.524235 | 0.143213 | 0.23894  | -5.3745  |
| FLJ37644  | -0.27246 | 0.057359 | -1.51768 | 0.145675 | 0.242202 | -5.37453 |
| FUNDC1    | 0.321653 | -0.19426 | 1.523928 | 0.143289 | 0.239047 | -5.37493 |
| SPOCK1    | 0.56667  | -0.27381 | 1.517371 | 0.145753 | 0.242291 | -5.37496 |
| C2orf81   | 0.398136 | -0.02591 | 1.523215 | 0.143466 | 0.239322 | -5.37593 |
| LOC390940 | 0.304012 | -0.03758 | 1.522913 | 0.143541 | 0.239427 | -5.37635 |
| MAGEC1    | 0.260868 | -0.1088  | 1.522826 | 0.143563 | 0.239443 | -5.37647 |
| CLUAP1    | -0.50615 | 0.443971 | -1.52228 | 0.1437   | 0.23962  | -5.37723 |
| WIZ       | -0.2822  | 0.345095 | -1.52226 | 0.143705 | 0.23962  | -5.37726 |
| INSM1     | -0.4971  | 0.145106 | -1.52225 | 0.143706 | 0.23962  | -5.37727 |
| FAM3C     | -0.57166 | 0.334193 | -1.52171 | 0.143842 | 0.239824 | -5.37803 |
| MLLT4     | -0.20225 | 0.025506 | -1.52166 | 0.143853 | 0.239824 | -5.37809 |
| SLC22A23  | 0.628272 | 0.002094 | 1.521152 | 0.143981 | 0.240017 | -5.37881 |
| FRRS1     | -0.48996 | -0.00225 | -1.52098 | 0.144023 | 0.240068 | -5.37905 |
| AARSD1    | -0.33826 | 0.393478 | -1.52064 | 0.14411  | 0.24017  | -5.37953 |
| ARID2     | 0.21402  | -0.49398 | 1.520527 | 0.144137 | 0.240178 | -5.37968 |
| UBE2T     | -0.55537 | 0.157147 | -1.52044 | 0.144159 | 0.240192 | -5.37981 |

|           |          |          |          |          |          |          |
|-----------|----------|----------|----------|----------|----------|----------|
| SCARB2    | -0.59418 | 0.482039 | -1.51998 | 0.144272 | 0.240319 | -5.38044 |
| GP1BB     | 0.519922 | 0.301458 | 1.519876 | 0.144299 | 0.240343 | -5.38059 |
| CDC20     | 0.437334 | -0.49242 | 1.518524 | 0.144638 | 0.240887 | -5.38247 |
| PAF1      | -0.43165 | 0.496083 | -1.51798 | 0.144775 | 0.241094 | -5.38323 |
| URGCP     | 0.348711 | 0.133907 | 1.51777  | 0.144827 | 0.241153 | -5.38352 |
| HLA-DOB   | -0.57123 | 0.55594  | -1.51774 | 0.144835 | 0.241153 | -5.38357 |
| GPR157    | 0.199834 | -0.12202 | 1.517665 | 0.144853 | 0.241163 | -5.38367 |
| MT1G      | 0.679789 | -0.09717 | 1.517566 | 0.144878 | 0.241184 | -5.38381 |
| COL24A1   | -0.31518 | 0.150452 | -1.51094 | 0.147373 | 0.244321 | -5.38387 |
| SLC6A14   | 0.376623 | -0.10704 | 1.517178 | 0.144975 | 0.241325 | -5.38435 |
| PYGB      | 0.362089 | 0.124302 | 1.517131 | 0.144987 | 0.241325 | -5.38441 |
| FKBP6     | 0.267982 | -0.0724  | 1.482079 | 0.154831 | 0.254276 | -5.38476 |
| ILK       | -0.28917 | 0.336852 | -1.51663 | 0.145113 | 0.241493 | -5.38511 |
| ALPPL2    | 0.236523 | -0.21472 | 1.516362 | 0.14518  | 0.241585 | -5.38548 |
| SNCAIP    | 0.256894 | -0.36461 | 1.467855 | 0.160546 | 0.261535 | -5.3858  |
| FBXO44    | -0.35894 | 0.548622 | -1.51607 | 0.145254 | 0.241687 | -5.38589 |
| EGR2      | -0.68338 | 0.452896 | -1.51558 | 0.145377 | 0.241871 | -5.38657 |
| RPUSD3    | -0.31712 | 0.488498 | -1.51549 | 0.145399 | 0.241887 | -5.3867  |
| TAF6L     | 0.348197 | 0.102844 | 1.515299 | 0.145448 | 0.241948 | -5.38696 |
| FAT3      | 0.193989 | -0.06913 | 1.515207 | 0.145471 | 0.241966 | -5.38709 |
| HTATSF1   | -0.34807 | -0.02486 | -1.51493 | 0.14554  | 0.24204  | -5.38748 |
| B4GALNT3  | -0.40311 | 0.352215 | -1.51448 | 0.145653 | 0.242186 | -5.3881  |
| LOC100501 | -0.39611 | 0.060312 | -1.50769 | 0.148198 | 0.245357 | -5.38837 |
| LENG8     | -0.36607 | 0.1291   | -1.51386 | 0.145811 | 0.242366 | -5.38897 |
| SOX7      | -0.3286  | -0.05314 | -1.51374 | 0.145841 | 0.242396 | -5.38914 |
| CBLC      | 0.304056 | -0.15806 | 1.51369  | 0.145853 | 0.242396 | -5.3892  |
| FAM84A    | -0.17885 | 0.03577  | -1.51355 | 0.145888 | 0.242433 | -5.38939 |
| RPS12     | 0.397112 | 0.079049 | 1.513457 | 0.145912 | 0.242452 | -5.38953 |
| ZNF480    | -0.50126 | 0.749748 | -1.51316 | 0.145987 | 0.242556 | -5.38994 |
| MAP7D1    | -0.22068 | 0.378017 | -1.51256 | 0.146138 | 0.242787 | -5.39077 |
| FPR3      | 0.305948 | -0.61307 | 1.477315 | 0.159167 | 0.259741 | -5.39101 |
| FAM170A   | -0.32757 | 0.124642 | -1.51238 | 0.146183 | 0.242841 | -5.39102 |
| DKFZP434H | 0.475366 | -0.2196  | 1.512128 | 0.146248 | 0.242928 | -5.39137 |
| RPL36A    | 0.494731 | -0.15858 | 1.511767 | 0.146339 | 0.243059 | -5.39187 |
| RBP5      | -0.27973 | 0.095447 | -1.51165 | 0.146369 | 0.243089 | -5.39204 |
| FAM75B    | 0.277358 | -0.24138 | 1.511535 | 0.146397 | 0.243115 | -5.3922  |
| KSR1      | -0.63436 | 0.509411 | -1.51134 | 0.146447 | 0.243177 | -5.39247 |
| HINFP     | -0.17174 | 0.205067 | -1.51116 | 0.146492 | 0.243231 | -5.39272 |
| AZI1      | 0.440797 | 0.139239 | 1.511001 | 0.146533 | 0.243278 | -5.39294 |
| HMP19     | 0.339345 | -0.73074 | 1.510871 | 0.146566 | 0.243311 | -5.39312 |
| ARPC2     | -0.24723 | 0.235679 | -1.51077 | 0.146591 | 0.243333 | -5.39326 |
| PRPH      | -0.29217 | 0.005223 | -1.51055 | 0.146648 | 0.243407 | -5.39357 |
| LOC728851 | 0.312746 | -0.19689 | 1.510402 | 0.146684 | 0.243426 | -5.39377 |
| AGMO      | 0.323573 | -0.26568 | 1.510235 | 0.146727 | 0.243476 | -5.394   |
| SHISA3    | -0.45509 | 0.302507 | -1.50997 | 0.146793 | 0.243565 | -5.39436 |
| LIPC      | 0.583986 | 0.009419 | 1.495362 | 0.152276 | 0.250751 | -5.39459 |
| ZNF772    | -0.31943 | 0.169889 | -1.50942 | 0.146935 | 0.24376  | -5.39514 |



|           |          |          |          |          |          |          |
|-----------|----------|----------|----------|----------|----------|----------|
| GLB1L2    | 0.334984 | -0.07836 | 1.509413 | 0.146935 | 0.24376  | -5.39514 |
| ATP6VOD2  | -0.3335  | 0.012594 | -1.50816 | 0.147254 | 0.244227 | -5.39688 |
| ABCA5     | -0.40289 | 0.117471 | -1.50808 | 0.147274 | 0.244228 | -5.39699 |
| NCKIPSD   | 0.430385 | 0.238488 | 1.508057 | 0.14728  | 0.244228 | -5.39702 |
| MAGEA10   | -0.42348 | 0.099226 | -1.50792 | 0.147315 | 0.244266 | -5.39721 |
| UBE2L6    | -0.52253 | 0.579242 | -1.50779 | 0.147349 | 0.244301 | -5.3974  |
| PPP2R1B   | -0.5116  | 0.398459 | -1.5076  | 0.147396 | 0.244338 | -5.39766 |
| GTSF1L    | -0.40854 | 0.647079 | -1.50732 | 0.147468 | 0.244428 | -5.39805 |
| MDN1      | -0.70254 | 0.330319 | -1.50727 | 0.147481 | 0.244428 | -5.39812 |
| NIPAL3    | -0.67918 | 0.556876 | -1.5068  | 0.147601 | 0.244595 | -5.39877 |
| NRIP3     | 0.279114 | -0.2813  | 1.506701 | 0.147625 | 0.244615 | -5.3989  |
| PGAP1     | 0.264116 | -0.15061 | 1.500027 | 0.150158 | 0.247993 | -5.39893 |
| IGFBPL1   | 0.269205 | -0.25254 | 1.506514 | 0.147673 | 0.244673 | -5.39916 |
| APIP      | -0.57659 | 0.222605 | -1.50638 | 0.147706 | 0.244684 | -5.39934 |
| UNC80     | -0.45984 | 0.147735 | -1.50638 | 0.147707 | 0.244684 | -5.39935 |
| TERT      | 0.188157 | -0.2285  | 1.50634  | 0.147717 | 0.244684 | -5.3994  |
| PCDHGB7   | -0.32546 | 0.065091 | -1.50541 | 0.147954 | 0.24505  | -5.40069 |
| DLL4      | 0.346967 | -0.2648  | 1.505376 | 0.147963 | 0.24505  | -5.40074 |
| RXFP2     | 0.339409 | -0.3265  | 1.505244 | 0.147997 | 0.245085 | -5.40092 |
| USP13     | 0.33317  | 0.005777 | 1.505177 | 0.148014 | 0.245093 | -5.40101 |
| ANKFN1    | 0.270461 | -0.18727 | 1.504962 | 0.148069 | 0.245163 | -5.40131 |
| METTL15   | -0.54886 | 0.098839 | -1.46336 | 0.160741 | 0.261744 | -5.40165 |
| RFPL3     | -0.3223  | 0.081744 | -1.49764 | 0.150773 | 0.248757 | -5.40221 |
| CCDC93    | -0.69556 | 0.745146 | -1.50423 | 0.148257 | 0.245433 | -5.40233 |
| CLRN1     | -0.43379 | 0.108598 | -1.50414 | 0.148278 | 0.245448 | -5.40244 |
| ATG9B     | -0.54599 | 0.741915 | -1.50406 | 0.148299 | 0.245461 | -5.40255 |
| KATNAL2   | -0.32093 | 0.064185 | -1.50395 | 0.148327 | 0.245466 | -5.40271 |
| CCNE1     | -0.35024 | 0.113903 | -1.50372 | 0.148385 | 0.245542 | -5.40302 |
| SEL1L     | -0.72608 | 0.581167 | -1.50355 | 0.148431 | 0.245597 | -5.40327 |
| RWDD2B    | -0.37868 | 0.287394 | -1.50333 | 0.148485 | 0.245645 | -5.40356 |
| NUP93     | -0.35236 | 0.247346 | -1.50295 | 0.148583 | 0.245786 | -5.40409 |
| TCF12     | -0.40056 | 0.188862 | -1.50237 | 0.148732 | 0.246012 | -5.4049  |
| FLJ36840  | -0.52498 | 0.481001 | -1.50213 | 0.148795 | 0.246095 | -5.40523 |
| LOC100506 | 0.270501 | -0.10147 | 1.501943 | 0.148841 | 0.246151 | -5.40548 |
| LOC340073 | -0.41048 | -0.00797 | -1.50168 | 0.148909 | 0.246241 | -5.40585 |
| ERVMER34  | -0.29493 | 0.017141 | -1.49475 | 0.151519 | 0.249778 | -5.40618 |
| STARD4    | -0.25851 | 0.073213 | -1.50097 | 0.149091 | 0.246504 | -5.40683 |
| RAD50     | -0.39352 | 0.214797 | -1.50097 | 0.149093 | 0.246504 | -5.40684 |
| FNDC1     | -0.30604 | -0.05263 | -1.48631 | 0.154633 | 0.254035 | -5.40694 |
| LYSMD1    | -0.64605 | 0.717107 | -1.50022 | 0.149285 | 0.246766 | -5.40787 |
| CEP104    | -0.27873 | 0.537411 | -1.5002  | 0.149289 | 0.246766 | -5.40789 |
| FSD2      | 0.48974  | -0.83512 | 1.263073 | 0.238771 | 0.354698 | -5.40798 |
| BAIAP2L1  | -0.36741 | -0.05572 | -1.50011 | 0.149313 | 0.246785 | -5.40802 |
| CKLF-CMT1 | -0.53089 | 0.230071 | -1.49999 | 0.149345 | 0.246817 | -5.40819 |
| C2orf85   | -0.21149 | 0.291894 | -1.4998  | 0.149391 | 0.246873 | -5.40844 |
| DEFA4     | 1.603984 | -0.75019 | 1.499414 | 0.149491 | 0.247018 | -5.40898 |
| TCEAL6    | 0.297677 | -0.06965 | 1.499275 | 0.149527 | 0.247056 | -5.40917 |

|           |          |          |          |          |          |          |
|-----------|----------|----------|----------|----------|----------|----------|
| KIAA1430  | 0.527883 | -0.82598 | 1.49894  | 0.149614 | 0.247178 | -5.40963 |
| KCNJ13    | 0.418677 | -0.24132 | 1.474476 | 0.158776 | 0.259259 | -5.41018 |
| TMEM232   | 0.47627  | -0.05176 | 1.498185 | 0.149808 | 0.247478 | -5.41067 |
| SYNGR3    | -0.23378 | 0.053675 | -1.49789 | 0.149885 | 0.247585 | -5.41109 |
| C9orf96   | -0.30086 | 0.162623 | -1.49767 | 0.14994  | 0.247654 | -5.41138 |
| TMEM147   | 0.299291 | -0.16231 | 1.495862 | 0.150408 | 0.248386 | -5.41388 |
| ZBTB38    | 0.330046 | 0.242701 | 1.495705 | 0.150449 | 0.248432 | -5.41409 |
| AP3S2     | -0.65108 | 0.282365 | -1.49557 | 0.150483 | 0.248467 | -5.41427 |
| FAM183B   | -0.43746 | 0.605227 | -1.48882 | 0.153063 | 0.251836 | -5.41431 |
| M6PR      | -0.4328  | 0.482411 | -1.4953  | 0.150553 | 0.248498 | -5.41465 |
| LOC100501 | -0.29727 | 0.059453 | -1.4953  | 0.150554 | 0.248498 | -5.41465 |
| FLJ31813  | 0.208877 | -0.04401 | 1.495281 | 0.150559 | 0.248498 | -5.41468 |
| EGLN1     | -0.4708  | 0.753911 | -1.49526 | 0.150565 | 0.248498 | -5.41471 |
| VWA3B     | -0.31155 | -0.19587 | -1.48842 | 0.153166 | 0.251985 | -5.41485 |
| SAV1      | -0.31573 | 0.461299 | -1.49506 | 0.150617 | 0.248559 | -5.41499 |
| F8A1      | -0.2579  | 0.510113 | -1.49502 | 0.150627 | 0.248559 | -5.41504 |
| H1FX      | -0.35101 | 0.589572 | -1.49453 | 0.150755 | 0.248748 | -5.41572 |
| LDB2      | 0.28821  | -0.15003 | 1.479192 | 0.156506 | 0.256382 | -5.4166  |
| QRFPR     | -0.29312 | 0.058624 | -1.49358 | 0.151    | 0.249111 | -5.41702 |
| PSMG1     | 0.317141 | -0.17333 | 1.493471 | 0.151028 | 0.249137 | -5.41717 |
| CHMP4B    | 0.422694 | -0.40871 | 1.493362 | 0.151056 | 0.249152 | -5.41732 |
| TNR       | -0.32623 | -0.09376 | -1.49334 | 0.151063 | 0.249152 | -5.41735 |
| ZMYM3     | -0.28766 | 0.389704 | -1.49328 | 0.151077 | 0.249154 | -5.41742 |
| ABCA11P   | -0.71022 | 0.190594 | -1.47805 | 0.15681  | 0.256814 | -5.41816 |
| CDKN2AIP  | -0.56375 | 0.133104 | -1.45084 | 0.164158 | 0.266003 | -5.4184  |
| PABPC3    | 0.394867 | -0.02742 | 1.477754 | 0.156887 | 0.256898 | -5.41855 |
| IL15      | -0.61815 | -0.15976 | -1.49187 | 0.151444 | 0.24972  | -5.41937 |
| CCL18     | -0.63715 | 0.565907 | -1.49184 | 0.151453 | 0.24972  | -5.41941 |
| GNB1      | -0.29072 | 0.147867 | -1.49182 | 0.151458 | 0.24972  | -5.41944 |
| F7        | -0.21157 | 0.034701 | -1.49171 | 0.151486 | 0.249745 | -5.41959 |
| ORM1      | -0.94035 | 1.065603 | -1.49132 | 0.151587 | 0.24987  | -5.42012 |
| C4orf41   | -0.71213 | 0.351401 | -1.4909  | 0.151696 | 0.250028 | -5.4207  |
| ZSCAN2    | 0.280814 | -0.0484  | 1.490476 | 0.151807 | 0.25019  | -5.42128 |
| IAH1      | -0.35318 | -0.22086 | -1.49041 | 0.151826 | 0.250199 | -5.42138 |
| PLS3      | -0.91595 | 0.594939 | -1.49031 | 0.151851 | 0.250221 | -5.42152 |
| ACTR6     | -0.59333 | -0.33739 | -1.49004 | 0.151921 | 0.250315 | -5.42188 |
| ERN2      | 0.219731 | -0.19862 | 1.489727 | 0.152003 | 0.250428 | -5.42231 |
| CCDC42    | 0.428437 | -0.2734  | 1.489544 | 0.15205  | 0.250486 | -5.42256 |
| ACSM2A    | -0.32637 | -0.08704 | -1.48947 | 0.15207  | 0.250497 | -5.42267 |
| CGA       | -0.65763 | 0.120141 | -1.48931 | 0.152111 | 0.250544 | -5.42288 |
| XIST      | -0.38209 | 0.167227 | -1.16182 | 0.270195 | 0.390197 | -5.42291 |
| ARL4C     | 0.472029 | -0.06395 | 1.489245 | 0.152128 | 0.250551 | -5.42297 |
| KIAA1267  | 0.294966 | -0.15829 | 1.488718 | 0.152266 | 0.250751 | -5.4237  |
| LOC100121 | 0.211443 | -0.0695  | 1.481914 | 0.154875 | 0.254326 | -5.42373 |
| BUTR1     | 0.572938 | -0.0369  | 1.452752 | 0.162724 | 0.264182 | -5.42433 |
| AK3       | 0.456644 | -0.02743 | 1.488233 | 0.152393 | 0.250923 | -5.42436 |
| CCDC112   | -0.20791 | 0.041582 | -1.48782 | 0.152502 | 0.251082 | -5.42494 |

|           |          |          |          |          |          |          |
|-----------|----------|----------|----------|----------|----------|----------|
| ST14      | -0.41565 | 0.466332 | -1.48751 | 0.152583 | 0.251194 | -5.42536 |
| MSH6      | -0.25131 | 0.048903 | -1.48737 | 0.152618 | 0.251231 | -5.42554 |
| LOC100655 | -0.46096 | 0.072089 | -1.48013 | 0.155345 | 0.25497  | -5.42616 |
| ZNF689    | 0.297    | 0.134482 | 1.486839 | 0.152758 | 0.25144  | -5.42627 |
| SGTB      | -0.44593 | 0.118202 | -1.48644 | 0.152862 | 0.251548 | -5.42682 |
| GRXCR1    | -0.37894 | 0.082886 | -1.4795  | 0.155513 | 0.255118 | -5.42702 |
| PKNOX1    | -0.65873 | 0.3427   | -1.48573 | 0.153048 | 0.251832 | -5.42779 |
| GCRG224   | 0.480507 | -0.21359 | 1.478415 | 0.1558   | 0.255524 | -5.42849 |
| TM4SF4    | -0.38286 | -0.01961 | -1.48486 | 0.153278 | 0.252147 | -5.42899 |
| SLC6A2    | 0.256126 | -0.3626  | 1.478037 | 0.1559   | 0.25561  | -5.42901 |
| RASSF3    | 0.401558 | -0.40197 | 1.484155 | 0.153463 | 0.25243  | -5.42995 |
| DNMT1     | 0.410975 | 0.020198 | 1.483869 | 0.153538 | 0.252532 | -5.43034 |
| SAT2      | -0.23973 | 0.044184 | -1.48302 | 0.153761 | 0.252878 | -5.4315  |
| MVK       | 0.329832 | -0.0294  | 1.482551 | 0.153885 | 0.253061 | -5.43215 |
| IZUMO1    | -0.41117 | 0.138885 | -1.44659 | 0.164425 | 0.266414 | -5.43257 |
| C1orf96   | -0.34828 | -0.0065  | -1.48219 | 0.153981 | 0.253177 | -5.43264 |
| HSPA1L    | -0.40666 | 0.293089 | -1.4821  | 0.154004 | 0.253193 | -5.43276 |
| B9D2      | -0.33591 | 0.330087 | -1.48187 | 0.154066 | 0.253274 | -5.43308 |
| SCLY      | -0.40267 | 0.446588 | -1.48151 | 0.154159 | 0.253406 | -5.43357 |
| ATP6V1G1  | -0.45328 | -0.10665 | -1.48123 | 0.154234 | 0.253508 | -5.43396 |
| BCL2L2    | -0.39035 | 0.163728 | -1.4807  | 0.154375 | 0.253718 | -5.43468 |
| PPFIA2    | 0.351296 | -0.42813 | 1.335013 | 0.201958 | 0.312332 | -5.43478 |
| FAM110C   | 0.574834 | -0.10092 | 1.480565 | 0.154409 | 0.253753 | -5.43486 |
| RWDD1     | -0.45257 | -0.20667 | -1.48016 | 0.154516 | 0.253906 | -5.43541 |
| EML1      | -0.39223 | 0.03348  | -1.48002 | 0.154552 | 0.253945 | -5.4356  |
| H6PD      | -0.53176 | 0.429766 | -1.47983 | 0.154604 | 0.254009 | -5.43587 |
| OSBPL8    | -0.50355 | 0.053516 | -1.47967 | 0.154646 | 0.254035 | -5.43608 |
| ISPD      | 0.276896 | 0.018784 | 1.472787 | 0.157297 | 0.257441 | -5.43614 |
| GABRG1    | -0.26349 | 0.052698 | -1.47909 | 0.154801 | 0.254268 | -5.43688 |
| ACD       | 0.256151 | -0.00125 | 1.478987 | 0.154827 | 0.254276 | -5.43702 |
| CHRNA     | -0.2913  | 0.064403 | -1.47186 | 0.157545 | 0.25777  | -5.43739 |
| ZFYVE1    | -0.2407  | 0.182926 | -1.47806 | 0.155072 | 0.254628 | -5.43828 |
| PSMF1     | 0.438258 | 0.246798 | 1.477531 | 0.155213 | 0.254839 | -5.439   |
| ST6GAL2   | -0.3662  | 0.206411 | -1.47735 | 0.155261 | 0.254897 | -5.43925 |
| E4F1      | -0.20947 | 0.201186 | -1.47717 | 0.15531  | 0.254955 | -5.4395  |
| MAPK8IP2  | 0.282101 | -0.25989 | 1.477036 | 0.155345 | 0.25497  | -5.43968 |
| FAAH2     | 0.622151 | -0.47428 | 1.476965 | 0.155363 | 0.254979 | -5.43977 |
| FGB       | -0.35041 | 0.148049 | -1.47659 | 0.155463 | 0.255091 | -5.44028 |
| PDE6G     | -0.59071 | 0.583193 | -1.47656 | 0.155471 | 0.255091 | -5.44033 |
| ROBO1     | -1.07477 | 0.573507 | -1.47644 | 0.155502 | 0.255118 | -5.44049 |
| SLA2      | -0.66636 | 0.989667 | -1.47633 | 0.155532 | 0.255127 | -5.44064 |
| MAGI1     | 0.633914 | -0.70585 | 1.461346 | 0.161287 | 0.262349 | -5.44068 |
| PRSS58    | -0.31638 | 0.085773 | -1.46045 | 0.16153  | 0.262678 | -5.44188 |
| CLEC14A   | 0.448509 | -0.52245 | 1.373991 | 0.189809 | 0.297935 | -5.4423  |
| C3orf14   | -0.59233 | 0.376243 | -1.47502 | 0.155882 | 0.25561  | -5.44243 |
| HCP5      | -0.41942 | 0.242674 | -1.47496 | 0.155897 | 0.25561  | -5.44251 |
| NTN5      | 0.38783  | -0.03487 | 1.474932 | 0.155904 | 0.25561  | -5.44255 |

|           |          |          |          |          |          |          |
|-----------|----------|----------|----------|----------|----------|----------|
| NMD3      | -0.51864 | -0.3497  | -1.4747  | 0.155966 | 0.255676 | -5.44286 |
| SDHA      | -0.21783 | 0.232502 | -1.47468 | 0.155971 | 0.255676 | -5.44289 |
| ATP4B     | 0.305508 | -0.1124  | 1.4745   | 0.15602  | 0.255713 | -5.44313 |
| GPR161    | -0.20484 | -0.09737 | -1.47412 | 0.15612  | 0.255853 | -5.44365 |
| RGSL1     | -0.23288 | 0.006085 | -1.47401 | 0.15615  | 0.255853 | -5.4438  |
| RIF1      | -0.47179 | -0.18465 | -1.474   | 0.156152 | 0.255853 | -5.44381 |
| EXOSC1    | -0.28831 | 0.114721 | -1.47398 | 0.156157 | 0.255853 | -5.44384 |
| SULT2B1   | 0.463575 | -0.40768 | 1.414244 | 0.176615 | 0.281761 | -5.44466 |
| FP588     | 0.378453 | -0.11133 | 1.43052  | 0.169826 | 0.272884 | -5.44532 |
| MT1B      | 0.670125 | -0.06989 | 1.472771 | 0.156481 | 0.256362 | -5.44549 |
| LOC44033  | 0.315464 | -0.31814 | 1.472506 | 0.156552 | 0.256435 | -5.44585 |
| FAM19A3   | 0.46601  | -0.47773 | 1.436372 | 0.167273 | 0.26998  | -5.44615 |
| TAGLN     | -0.59936 | 0.577697 | -1.47168 | 0.156773 | 0.256776 | -5.44697 |
| ZNF396    | -0.61283 | 0.500188 | -1.47049 | 0.157093 | 0.257214 | -5.4486  |
| IGFBP6    | 0.517892 | -0.20075 | 1.470392 | 0.157118 | 0.257234 | -5.44872 |
| EEF1B2    | -0.65291 | 0.034608 | -1.47028 | 0.157149 | 0.257262 | -5.44888 |
| RNF212    | -0.48984 | 0.06657  | -1.46984 | 0.157266 | 0.257429 | -5.44947 |
| SGTA      | 0.402524 | 0.079347 | 1.4698   | 0.157277 | 0.257429 | -5.44953 |
| RGS7BP    | 0.535559 | -0.15889 | 1.469383 | 0.157389 | 0.257569 | -5.45009 |
| CHD3      | 0.384199 | 0.089762 | 1.469071 | 0.157473 | 0.257685 | -5.45052 |
| TNFRSF9   | -0.41479 | 0.337249 | -1.46878 | 0.157551 | 0.25777  | -5.45091 |
| ATP1A4    | -0.39131 | 0.290062 | -1.46839 | 0.157656 | 0.25792  | -5.45144 |
| AGPAT5    | -0.3855  | 0.174659 | -1.46825 | 0.157693 | 0.257944 | -5.45163 |
| PLIN2     | -0.55054 | 0.824858 | -1.46824 | 0.157697 | 0.257944 | -5.45165 |
| LOC10050  | -0.93025 | 0.777588 | -1.46817 | 0.157716 | 0.257947 | -5.45174 |
| BPTF      | -0.56116 | 0.585382 | -1.46813 | 0.157725 | 0.257947 | -5.45179 |
| PPP1R9A   | -0.37574 | 0.236431 | -1.43175 | 0.168577 | 0.271413 | -5.45228 |
| KRTAP17-1 | -0.27022 | 0.053873 | -1.45252 | 0.163695 | 0.265385 | -5.45251 |
| MAGT1     | -0.59942 | 0.363409 | -1.46747 | 0.157904 | 0.258182 | -5.4527  |
| TDP1      | 0.337521 | -0.11532 | 1.467452 | 0.157908 | 0.258182 | -5.45271 |
| DZIP3     | -0.4318  | 0.160307 | -1.46742 | 0.157915 | 0.258182 | -5.45275 |
| ABCG4     | -0.34646 | -0.08313 | -1.4674  | 0.157922 | 0.258182 | -5.45278 |
| CDC20B    | -0.50725 | 0.090319 | -1.46041 | 0.160632 | 0.26161  | -5.45287 |
| C15orf52  | 0.478064 | 0.469445 | 1.467157 | 0.157987 | 0.258268 | -5.45311 |
| LOC10013  | -0.27467 | -0.03245 | -1.46687 | 0.158065 | 0.258374 | -5.45351 |
| DUSP10    | 0.351762 | 0.192961 | 1.466581 | 0.158143 | 0.258479 | -5.4539  |
| HLA-DMB   | -0.6195  | 0.599729 | -1.46622 | 0.15824  | 0.258616 | -5.45438 |
| TMEM176   | 0.775012 | -0.36331 | 1.465967 | 0.158308 | 0.258706 | -5.45473 |
| F9        | 0.400818 | -0.28396 | 1.385955 | 0.182818 | 0.289296 | -5.45483 |
| TRAF2     | 0.24532  | 0.052464 | 1.465851 | 0.15834  | 0.258736 | -5.45489 |
| CEP44     | -0.55365 | 0.179347 | -1.4155  | 0.175123 | 0.279769 | -5.45495 |
| EPGN      | -0.11704 | 0.013703 | -1.42953 | 0.169205 | 0.272155 | -5.45521 |
| KCNJ14    | 0.430017 | 0.190366 | 1.465576 | 0.158414 | 0.258836 | -5.45526 |
| CNTN5     | -0.65271 | 0.242876 | -1.46542 | 0.158456 | 0.258874 | -5.45547 |
| C19orf24  | 0.335542 | 0.060485 | 1.465392 | 0.158463 | 0.258874 | -5.45551 |
| NEGR1     | 0.346298 | -0.10432 | 1.465199 | 0.158516 | 0.258937 | -5.45577 |
| AURKAIP1  | -0.17765 | 0.234018 | -1.46485 | 0.158609 | 0.259063 | -5.45624 |

|          |          |          |          |          |          |          |
|----------|----------|----------|----------|----------|----------|----------|
| MRPL1    | -0.24108 | 0.048216 | -1.46482 | 0.158619 | 0.259063 | -5.45629 |
| HNF4G    | -0.2406  | 0.048121 | -1.46447 | 0.158712 | 0.259193 | -5.45675 |
| MAGI2    | -0.31768 | 0.097926 | -1.46418 | 0.158791 | 0.259259 | -5.45715 |
| ITGA5    | 0.32795  | 0.199147 | 1.464178 | 0.158792 | 0.259259 | -5.45715 |
| MBTD1    | -0.4243  | -0.09762 | -1.44876 | 0.164731 | 0.266821 | -5.45753 |
| CD3E     | 0.50033  | 0.162682 | 1.463868 | 0.158876 | 0.259352 | -5.45757 |
| DECR2    | -0.29224 | 0.088601 | -1.46356 | 0.158958 | 0.259455 | -5.45798 |
| EXOC4    | -0.24538 | 0.131958 | -1.46354 | 0.158965 | 0.259455 | -5.45802 |
| MARCKSL1 | 0.477297 | 0.113115 | 1.463228 | 0.159049 | 0.25957  | -5.45844 |
| TPP1     | -0.43007 | 0.293365 | -1.46241 | 0.159271 | 0.25989  | -5.45955 |
| DHRS4    | 0.348385 | -0.02853 | 1.461621 | 0.159484 | 0.260206 | -5.46061 |
| TMEM126  | -0.6302  | -0.63503 | -1.4616  | 0.159491 | 0.260206 | -5.46065 |
| SORCS2   | -0.69323 | 0.702045 | -1.46154 | 0.159507 | 0.26021  | -5.46073 |
| DNAH10   | -0.72778 | 0.325378 | -1.45451 | 0.162241 | 0.263595 | -5.4608  |
| TRIM50   | -0.40044 | 0.287279 | -1.4614  | 0.159545 | 0.260251 | -5.46092 |
| AATK     | -0.60811 | 0.594068 | -1.46097 | 0.159661 | 0.260418 | -5.46149 |
| DNAJC14  | -0.32532 | 0.326819 | -1.4607  | 0.159736 | 0.260518 | -5.46186 |
| BRCA1    | -0.43088 | 0.371566 | -1.46055 | 0.159777 | 0.260563 | -5.46207 |
| TANC2    | -0.47129 | 0.378741 | -1.46045 | 0.159802 | 0.260582 | -5.46219 |
| LOC64466 | 0.645398 | -0.35096 | 1.424068 | 0.170758 | 0.274153 | -5.46242 |
| TMEM219  | 0.312681 | -0.10751 | 1.460132 | 0.159889 | 0.260703 | -5.46262 |
| REST     | -0.47523 | 0.106739 | -1.45997 | 0.159933 | 0.260752 | -5.46284 |
| C14orf28 | -0.28929 | -0.21837 | -1.45979 | 0.159983 | 0.260795 | -5.46309 |
| CTDSPL2  | -0.32076 | -0.16298 | -1.45949 | 0.160063 | 0.260873 | -5.46349 |
| WFDC2    | 0.193445 | -0.08818 | 1.459474 | 0.160068 | 0.260873 | -5.46351 |
| STMN4    | -0.22326 | -0.05841 | -1.44427 | 0.165974 | 0.268192 | -5.46351 |
| CMPK1    | -0.36371 | -0.22105 | -1.35705 | 0.195016 | 0.30428  | -5.46352 |
| LOC10050 | 0.394258 | -0.3349  | 1.459454 | 0.160074 | 0.260873 | -5.46354 |
| SKP1     | -0.51099 | 0.516417 | -1.45892 | 0.160219 | 0.261072 | -5.46426 |
| LACRT    | 0.486092 | -0.30309 | 1.458908 | 0.160222 | 0.261072 | -5.46428 |
| PAMR1    | -0.27711 | -0.15252 | -1.45885 | 0.160238 | 0.261076 | -5.46435 |
| NOL10    | -0.53005 | 0.162234 | -1.45831 | 0.160385 | 0.261294 | -5.46508 |
| CLDN9    | -0.38047 | 0.363163 | -1.45761 | 0.160576 | 0.261561 | -5.46603 |
| NEK10    | -0.43539 | 0.036274 | -1.45754 | 0.160595 | 0.261571 | -5.46612 |
| SLC1A6   | -0.32164 | -0.05297 | -1.45725 | 0.160674 | 0.261656 | -5.46651 |
| PSTPIP1  | 0.302139 | -0.07673 | 1.456937 | 0.16076  | 0.261753 | -5.46694 |
| OCM2     | -0.33032 | 0.040366 | -1.45672 | 0.160818 | 0.261826 | -5.46723 |
| RRAD     | -0.19706 | 0.387643 | -1.4566  | 0.160853 | 0.261834 | -5.46739 |
| CXorf61  | 0.485468 | -0.07144 | 1.456578 | 0.160858 | 0.261834 | -5.46742 |
| RPTOR    | 0.410186 | 0.006576 | 1.456559 | 0.160863 | 0.261834 | -5.46745 |
| PRR5L    | 0.480199 | -0.31092 | 1.413647 | 0.174654 | 0.279134 | -5.46745 |
| YPEL1    | 0.297852 | 0.151753 | 1.456454 | 0.160892 | 0.261856 | -5.46759 |
| C12orf26 | 0.319265 | -0.11524 | 1.456412 | 0.160903 | 0.261856 | -5.46765 |
| TMEM163  | -0.38654 | -0.03876 | -1.45617 | 0.160969 | 0.261941 | -5.46797 |
| TKTL2    | -0.34495 | 0.167536 | -1.43068 | 0.17079  | 0.274153 | -5.46848 |
| SCRN2    | -0.37822 | 0.305106 | -1.45559 | 0.161129 | 0.262179 | -5.46876 |
| TMEM191  | 0.301203 | -0.1046  | 1.455294 | 0.161209 | 0.262288 | -5.46915 |

|          |          |          |          |          |          |          |
|----------|----------|----------|----------|----------|----------|----------|
| EFR3B    | -0.24375 | 0.058549 | -1.45524 | 0.161224 | 0.262291 | -5.46923 |
| ST3GAL6  | -0.58565 | 0.048051 | -1.45514 | 0.161251 | 0.262313 | -5.46936 |
| LOC33857 | 0.313792 | -0.11582 | 1.447776 | 0.164095 | 0.265924 | -5.46983 |
| PSMB2    | -0.22506 | 0.174875 | -1.45457 | 0.161407 | 0.262523 | -5.47012 |
| ELK3     | -0.26213 | 0.242873 | -1.45434 | 0.161472 | 0.262607 | -5.47044 |
| LOC72897 | 0.435586 | -0.11379 | 1.453475 | 0.161708 | 0.262947 | -5.4716  |
| MPV17L   | 0.263056 | -0.23096 | 1.417042 | 0.172774 | 0.276691 | -5.47166 |
| HTRA4    | 0.331008 | -0.44023 | 1.438128 | 0.167685 | 0.270444 | -5.47167 |
| TPD52L3  | -0.23369 | 0.067691 | -1.45326 | 0.161767 | 0.263021 | -5.47189 |
| ZNF295   | -0.23732 | 0.214167 | -1.45296 | 0.161848 | 0.263118 | -5.47229 |
| KCP      | 0.240709 | -0.2584  | 1.452944 | 0.161854 | 0.263118 | -5.47232 |
| IFT74    | 0.607321 | -0.06479 | 1.416362 | 0.17297  | 0.276894 | -5.47255 |
| C1orf100 | 0.326377 | -0.05864 | 1.44564  | 0.164687 | 0.266772 | -5.47268 |
| PTPN21   | -0.26901 | 0.09071  | -1.45265 | 0.161934 | 0.263225 | -5.47271 |
| LOC44090 | 0.272845 | -0.11443 | 1.452609 | 0.161946 | 0.263225 | -5.47277 |
| HSF2BP   | -0.43589 | 0.115432 | -1.45192 | 0.162136 | 0.263507 | -5.4737  |
| TBC1D21  | 0.321054 | -0.07633 | 1.451811 | 0.162165 | 0.263507 | -5.47384 |
| PIH1D1   | -0.28101 | 0.337525 | -1.4518  | 0.162169 | 0.263507 | -5.47386 |
| EXOSC7   | -0.54207 | 0.39077  | -1.45178 | 0.162174 | 0.263507 | -5.47388 |
| INADL    | -0.33154 | 0.202954 | -1.41528 | 0.173282 | 0.277325 | -5.47396 |
| LOC10050 | -0.50827 | 0.053764 | -1.44429 | 0.165061 | 0.267124 | -5.47448 |
| LRRN4    | 0.520084 | -0.11629 | 1.444129 | 0.165106 | 0.267156 | -5.4747  |
| CRX      | 0.121573 | -0.08785 | 1.444098 | 0.165115 | 0.267156 | -5.47474 |
| MAB21L2  | -0.20594 | -0.0166  | -1.45112 | 0.162356 | 0.26376  | -5.47477 |
| STK32C   | -0.42482 | 0.68853  | -1.45098 | 0.162396 | 0.263802 | -5.47497 |
| EIF6     | 0.246105 | -0.11626 | 1.450697 | 0.162472 | 0.263905 | -5.47534 |
| C2orf48  | 0.530282 | -0.07998 | 1.399732 | 0.179719 | 0.285482 | -5.47539 |
| NRSN2    | -0.31747 | 0.589667 | -1.45055 | 0.162513 | 0.263949 | -5.47554 |
| RXFP3    | 0.30519  | -0.32587 | 1.450419 | 0.162549 | 0.263985 | -5.47571 |
| LOC10050 | -0.24338 | 0.040532 | -1.44988 | 0.162698 | 0.264182 | -5.47644 |
| CCDC61   | 0.331707 | -0.0629  | 1.449841 | 0.162708 | 0.264182 | -5.47649 |
| CUL4B    | -0.35006 | 0.164779 | -1.44979 | 0.162723 | 0.264182 | -5.47656 |
| KIAA0182 | 0.407393 | 0.131773 | 1.406392 | 0.176764 | 0.281942 | -5.47691 |
| NCOA3    | -0.44239 | -0.01982 | -1.44931 | 0.162854 | 0.264351 | -5.4772  |
| GGNBP1   | 0.456067 | -0.18347 | 1.449309 | 0.162855 | 0.264351 | -5.4772  |
| PAGE2B   | 0.755181 | -0.31426 | 1.362109 | 0.19108  | 0.299522 | -5.4773  |
| ASMTL    | -0.26687 | 0.351556 | -1.44922 | 0.162879 | 0.264367 | -5.47732 |
| BCORL1   | -0.51447 | 0.451643 | -1.44898 | 0.162947 | 0.264444 | -5.47765 |
| FLNA     | 0.530585 | 0.073112 | 1.448955 | 0.162953 | 0.264444 | -5.47768 |
| PITX1    | -0.47359 | -0.47516 | -1.44844 | 0.163096 | 0.264655 | -5.47838 |
| HCG22    | -0.17216 | 0.029949 | -1.40524 | 0.177102 | 0.282216 | -5.4784  |
| RSC1A1   | 0.326201 | 0.037801 | 1.448355 | 0.163119 | 0.26467  | -5.47849 |
| COL3A1   | 0.446137 | -0.17722 | 1.448225 | 0.163155 | 0.264706 | -5.47866 |
| EIF4EBP1 | 0.296591 | -0.02755 | 1.447918 | 0.163239 | 0.264822 | -5.47907 |
| GPX7     | -0.54569 | 0.313426 | -1.4477  | 0.163299 | 0.264896 | -5.47936 |
| FOXN4    | 0.499945 | -0.79905 | 1.196939 | 0.256794 | 0.37523  | -5.47965 |
| CGGBP1   | 0.162277 | -0.11599 | 1.4473   | 0.163411 | 0.265037 | -5.4799  |

|           |          |          |          |          |          |          |
|-----------|----------|----------|----------|----------|----------|----------|
| ARHGAP19  | -0.30518 | 0.385372 | -1.44729 | 0.163413 | 0.265037 | -5.47991 |
| MRPS26    | 0.357364 | -0.04286 | 1.446821 | 0.163543 | 0.265226 | -5.48054 |
| IQGAP1    | -0.55124 | 0.225918 | -1.44667 | 0.163585 | 0.26524  | -5.48075 |
| C9orf153  | 0.298214 | -0.07152 | 1.446671 | 0.163585 | 0.26524  | -5.48075 |
| CEACAM2C  | 0.331348 | -0.22457 | 1.446645 | 0.163592 | 0.26524  | -5.48078 |
| PLA2R1    | 0.331536 | -0.3125  | 1.402936 | 0.177777 | 0.282992 | -5.48139 |
| FLJ33534  | 0.40361  | -0.40175 | 1.364881 | 0.189235 | 0.297248 | -5.48167 |
| DOCK9     | 0.558321 | -0.34039 | 1.445851 | 0.163812 | 0.265553 | -5.48185 |
| ROBO3     | 0.526471 | -0.02393 | 1.445721 | 0.163848 | 0.265589 | -5.48202 |
| AEBP1     | -0.44393 | 0.711541 | -1.44535 | 0.163952 | 0.265735 | -5.48252 |
| MIRLET7B  | 0.436602 | -0.35644 | 1.445048 | 0.164035 | 0.265848 | -5.48292 |
| SIX1      | -0.41419 | -0.42412 | -1.35766 | 0.196257 | 0.305632 | -5.48428 |
| STX7      | 0.28231  | -0.15371 | 1.436103 | 0.167349 | 0.270057 | -5.48539 |
| C11orf95  | -0.48174 | 0.665123 | -1.44298 | 0.16461  | 0.266692 | -5.48569 |
| LOC100137 | 0.198672 | -0.0507  | 1.435745 | 0.16745  | 0.270175 | -5.48587 |
| ANKS6     | -0.44125 | 0.455266 | -1.44282 | 0.164654 | 0.26674  | -5.4859  |
| CARD16    | -0.64293 | 0.80552  | -1.44249 | 0.164748 | 0.266827 | -5.48635 |
| CRYGS     | 0.204388 | 0.004969 | 1.442403 | 0.164771 | 0.266834 | -5.48646 |
| C10orf95  | 0.380353 | -0.25153 | 1.442317 | 0.164795 | 0.266834 | -5.48658 |
| MT1A      | 0.531521 | -0.07569 | 1.442274 | 0.164807 | 0.266834 | -5.48664 |
| BTD       | -0.38354 | 0.384026 | -1.44217 | 0.164836 | 0.26686  | -5.48678 |
| HIST3H2BE | -0.45016 | 0.402334 | -1.44194 | 0.164899 | 0.26694  | -5.48708 |
| LOC100506 | -0.27104 | 0.050858 | -1.44188 | 0.164918 | 0.266948 | -5.48717 |
| SMC1A     | 0.412727 | -0.20439 | 1.441503 | 0.165022 | 0.267094 | -5.48767 |
| JMJD7-PLA | 0.231389 | -0.00078 | 1.44134  | 0.165068 | 0.267124 | -5.48789 |
| LRRC8D    | 0.270157 | -0.259   | 1.44105  | 0.165149 | 0.267189 | -5.48827 |
| GPR128    | 0.794061 | -0.43977 | 1.368723 | 0.191416 | 0.299952 | -5.48833 |
| ALB       | -0.39346 | 0.178865 | -1.3969  | 0.179556 | 0.285292 | -5.48921 |
| DFFB      | 0.436308 | -0.2206  | 1.440106 | 0.165412 | 0.267593 | -5.48953 |
| LRRC59    | -0.38801 | 0.587219 | -1.43988 | 0.165477 | 0.267667 | -5.48984 |
| APOBR     | -0.45836 | 0.522603 | -1.43985 | 0.165485 | 0.267667 | -5.48988 |
| C21orf128 | 0.503474 | 0.141611 | 1.439606 | 0.165552 | 0.267747 | -5.4902  |
| IQGAP2    | -0.87761 | 0.388795 | -1.43246 | 0.168374 | 0.27122  | -5.49023 |
| PTPN9     | -0.22851 | 0.192978 | -1.43953 | 0.165574 | 0.267747 | -5.49031 |
| KIAA0907  | -0.43938 | 0.414458 | -1.43952 | 0.165576 | 0.267747 | -5.49032 |
| CRY2      | -0.36632 | 0.341753 | -1.43927 | 0.165647 | 0.26784  | -5.49066 |
| C12orf33  | 0.365553 | -0.13297 | 1.395766 | 0.179892 | 0.285686 | -5.49068 |
| LPAR1     | -0.53791 | 0.175704 | -1.43918 | 0.165672 | 0.267858 | -5.49077 |
| IGHMBP2   | -0.30846 | 0.210811 | -1.43904 | 0.16571  | 0.267898 | -5.49096 |
| CCR8      | 0.368498 | -0.21855 | 1.431794 | 0.168563 | 0.271413 | -5.49111 |
| SLC7A10   | 0.429983 | 0.133029 | 1.438801 | 0.165777 | 0.267985 | -5.49128 |
| C8orf47   | 0.385426 | -0.26956 | 1.438697 | 0.165807 | 0.26801  | -5.49142 |
| ZNF224    | -0.72083 | 0.538855 | -1.4386  | 0.165835 | 0.268026 | -5.49155 |
| CDR1      | -0.6207  | 0.452587 | -1.43856 | 0.165844 | 0.268026 | -5.49159 |
| TFDP2     | -0.24876 | 0.217514 | -1.43141 | 0.168673 | 0.271478 | -5.49163 |
| BPY2B     | -0.65581 | 0.439586 | -1.43132 | 0.168697 | 0.271495 | -5.49174 |
| ECEL1P2   | 0.410277 | 0.083748 | 1.422729 | 0.172042 | 0.275881 | -5.492   |

|           |          |          |          |          |          |          |
|-----------|----------|----------|----------|----------|----------|----------|
| PCDHGB2   | 0.294046 | -0.00781 | 1.43107  | 0.168768 | 0.271587 | -5.49207 |
| COMMD9    | -0.28828 | 0.181523 | -1.43815 | 0.165959 | 0.26819  | -5.49214 |
| NTF4      | -0.2049  | 0.04031  | -1.43758 | 0.16612  | 0.268406 | -5.49291 |
| DBF4      | 0.550398 | 0.108008 | 1.437272 | 0.166206 | 0.268523 | -5.49332 |
| CST11     | 0.28392  | -0.16864 | 1.437124 | 0.166248 | 0.268568 | -5.49352 |
| LHFPL4    | -0.28581 | -0.20574 | -1.43691 | 0.166307 | 0.268641 | -5.4938  |
| ZNF826P   | -0.19483 | 0.011264 | -1.43661 | 0.166391 | 0.268755 | -5.4942  |
| HSPA12B   | -0.32627 | -0.02389 | -1.39957 | 0.177872 | 0.283099 | -5.49447 |
| NRTN      | 0.400825 | 0.237655 | 1.436266 | 0.166489 | 0.268869 | -5.49466 |
| NXPH2     | -0.70527 | 0.584784 | -1.43619 | 0.166511 | 0.268882 | -5.49476 |
| ZBPB      | -0.28718 | -0.09351 | -1.42899 | 0.169356 | 0.272287 | -5.49482 |
| ARAP2     | -0.54766 | -0.23913 | -1.43601 | 0.166562 | 0.268942 | -5.49501 |
| LOC100655 | -0.36158 | 0.486464 | -1.42883 | 0.169403 | 0.27234  | -5.49504 |
| LOC100506 | 0.728233 | 0.030143 | 1.399099 | 0.17801  | 0.283226 | -5.49508 |
| LOC285385 | 0.371688 | -0.0493  | 1.398818 | 0.178093 | 0.28329  | -5.49545 |
| IGFBP4    | -0.48987 | 0.58166  | -1.43548 | 0.166711 | 0.26916  | -5.49571 |
| MSH4      | 0.570503 | -0.53727 | 1.419804 | 0.17288  | 0.276772 | -5.49584 |
| TMEM184A  | 0.278772 | 0.248973 | 1.435054 | 0.16683  | 0.26933  | -5.49628 |
| FLJ32063  | -0.48129 | 0.119116 | -1.42703 | 0.169913 | 0.272982 | -5.49742 |
| DCAKD     | -0.28175 | 0.53073  | -1.43393 | 0.167146 | 0.269811 | -5.49777 |
| PCDHGA7   | 0.358941 | -0.38645 | 1.433901 | 0.167155 | 0.269811 | -5.49781 |
| ANKRD45   | 0.671454 | -1.46301 | 0.720848 | 0.512188 | 0.630981 | -5.4979  |
| NRIP2     | 0.46315  | -0.47544 | 1.329207 | 0.203821 | 0.314511 | -5.49795 |
| TIMM9     | 0.455373 | -0.3767  | 1.433415 | 0.167292 | 0.269987 | -5.49846 |
| IL36G     | -0.32474 | -0.27432 | -1.41756 | 0.173526 | 0.277601 | -5.49879 |
| CLDN5     | 0.489404 | 0.012719 | 1.433144 | 0.167368 | 0.270066 | -5.49882 |
| GRK4      | 0.495904 | -0.14676 | 1.344431 | 0.196614 | 0.306018 | -5.49945 |
| LIMS3     | 0.41572  | -0.0708  | 1.432428 | 0.16757  | 0.270348 | -5.49977 |
| ARL17B    | -0.43028 | 0.313433 | -1.43219 | 0.167638 | 0.270413 | -5.50009 |
| FBXO36    | -0.2436  | -0.03421 | -1.43219 | 0.167638 | 0.270413 | -5.50009 |
| NINJ2     | 0.428735 | -0.49847 | 1.4321   | 0.167663 | 0.270431 | -5.50021 |
| LOC100507 | -0.35476 | -0.09172 | -1.43195 | 0.167706 | 0.270455 | -5.50041 |
| TBX10     | 0.239192 | -0.22651 | 1.431732 | 0.167767 | 0.270532 | -5.5007  |
| PROK1     | -0.28116 | 0.20726  | -1.43158 | 0.16781  | 0.270547 | -5.5009  |
| PBX4      | 0.433675 | -0.15962 | 1.431569 | 0.167813 | 0.270547 | -5.50092 |
| PHTF2     | -0.49658 | 0.064779 | -1.43155 | 0.167818 | 0.270547 | -5.50094 |
| NME2      | 0.390375 | -0.34081 | 1.431182 | 0.167923 | 0.270694 | -5.50143 |
| OR10C1    | 0.348284 | -0.31906 | 1.431001 | 0.167974 | 0.270754 | -5.50167 |
| PAPOLB    | -0.29104 | -0.04835 | -1.4308  | 0.168032 | 0.270803 | -5.50194 |
| ZNF217    | 0.450162 | -0.45233 | 1.430477 | 0.168122 | 0.270926 | -5.50237 |
| IFRD1     | -0.61575 | 0.209848 | -1.43007 | 0.168239 | 0.271092 | -5.50291 |
| ZNF248    | -0.1741  | 0.028899 | -1.42967 | 0.168351 | 0.27122  | -5.50344 |
| HERC2P2   | -0.7428  | 0.929422 | -1.42967 | 0.168352 | 0.27122  | -5.50344 |
| EIF3F     | -0.31029 | 0.22718  | -1.42953 | 0.168391 | 0.27122  | -5.50363 |
| EMD       | 0.284811 | -0.08256 | 1.429526 | 0.168392 | 0.27122  | -5.50363 |
| RSG1      | -0.26915 | 0.369186 | -1.42949 | 0.168402 | 0.27122  | -5.50368 |
| ZNF251    | -0.25025 | 0.062758 | -1.4293  | 0.168456 | 0.271285 | -5.50393 |



|           |          |          |          |          |          |          |
|-----------|----------|----------|----------|----------|----------|----------|
| C10orf12  | -0.38907 | 0.531633 | -1.42902 | 0.168535 | 0.27139  | -5.5043  |
| CFHR1     | -0.30557 | 0.060575 | -1.42161 | 0.171462 | 0.275109 | -5.50458 |
| MDFIC     | -0.2014  | 0.040279 | -1.42881 | 0.168596 | 0.271421 | -5.50458 |
| NAF1      | -0.18819 | 0.253172 | -1.4287  | 0.168628 | 0.27145  | -5.50473 |
| MMP11     | -0.49206 | 0.633514 | -1.42862 | 0.168648 | 0.27146  | -5.50483 |
| RGS13     | -0.57735 | 0.22003  | -1.42806 | 0.168807 | 0.271628 | -5.50557 |
| REM1      | -0.28645 | -0.01817 | -1.34577 | 0.195209 | 0.304497 | -5.50572 |
| GPR89B    | -0.39871 | 0.330135 | -1.42793 | 0.168844 | 0.271665 | -5.50575 |
| RANBP1    | -0.34304 | 0.479674 | -1.4275  | 0.168966 | 0.271839 | -5.50631 |
| AGBL1     | 0.476265 | -1.04115 | 1.344849 | 0.1955   | 0.304854 | -5.50687 |
| IP6K2     | -0.64588 | 0.551665 | -1.4269  | 0.169139 | 0.272095 | -5.50712 |
| CA11      | -0.54589 | 0.761863 | -1.4268  | 0.169168 | 0.272118 | -5.50725 |
| S100P     | -0.74551 | -0.03637 | -1.42657 | 0.169232 | 0.272172 | -5.50755 |
| PLS1      | -0.25248 | 0.107719 | -1.42653 | 0.169245 | 0.272172 | -5.50761 |
| PTTG2     | -0.21419 | 0.098601 | -1.42648 | 0.169257 | 0.272172 | -5.50767 |
| SLC15A4   | -0.33725 | 0.098118 | -1.42618 | 0.169342 | 0.272287 | -5.50807 |
| RSAD1     | 0.367535 | -0.01676 | 1.425893 | 0.169425 | 0.272354 | -5.50845 |
| MCM2      | -0.41121 | 0.431809 | -1.42507 | 0.16966  | 0.272708 | -5.50954 |
| LOC100131 | -0.36054 | 0.093771 | -1.42485 | 0.169724 | 0.272789 | -5.50984 |
| ARHGAP32  | -0.47219 | 0.546401 | -1.42469 | 0.169769 | 0.272839 | -5.51005 |
| NUCB2     | -0.74364 | 0.86875  | -1.4246  | 0.169794 | 0.272857 | -5.51017 |
| PGAP2     | -0.26479 | 0.189747 | -1.42444 | 0.169839 | 0.272884 | -5.51037 |
| FAT2      | 0.207436 | -0.0458  | 1.417097 | 0.172758 | 0.27669  | -5.51052 |
| PI4K2B    | -0.61885 | -0.24378 | -1.42377 | 0.17003  | 0.273147 | -5.51126 |
| ATP10A    | -0.39864 | 0.434743 | -1.42326 | 0.170177 | 0.27336  | -5.51194 |
| MTERFD2   | -0.71888 | 1.024231 | -1.42283 | 0.170301 | 0.273537 | -5.51251 |
| AQP11     | -0.40478 | 0.208001 | -1.42235 | 0.170438 | 0.273735 | -5.51315 |
| SERPINE3  | 0.656454 | -0.32971 | 1.187922 | 0.256333 | 0.374652 | -5.51316 |
| ARL5A     | -0.22006 | -0.11011 | -1.42209 | 0.170512 | 0.273832 | -5.51349 |
| CEP78     | 0.329239 | -0.1401  | 1.421786 | 0.170599 | 0.273938 | -5.51389 |
| KIF22     | 0.336715 | -0.01123 | 1.42176  | 0.170607 | 0.273938 | -5.51392 |
| C16orf55  | -0.38679 | 0.642225 | -1.4212  | 0.170769 | 0.274153 | -5.51467 |
| SYNGR4    | 0.283408 | -0.4027  | 1.421098 | 0.170797 | 0.274153 | -5.5148  |
| GNL3L     | -0.21415 | 0.250175 | -1.42101 | 0.170823 | 0.274173 | -5.51492 |
| MIF       | 0.431323 | -0.12764 | 1.419072 | 0.171379 | 0.274998 | -5.51748 |
| DNAJB9    | -0.35046 | -0.32259 | -1.41868 | 0.171491 | 0.275132 | -5.51799 |
| FLJ23867  | 0.311029 | -0.35569 | 1.418513 | 0.17154  | 0.275188 | -5.51821 |
| TMEM143   | 0.207286 | -0.202   | 1.4181   | 0.171659 | 0.275357 | -5.51876 |
| NLE1      | 0.370847 | -0.00993 | 1.417778 | 0.171751 | 0.275483 | -5.51918 |
| TFAP2B    | 0.402459 | -0.30289 | 1.409929 | 0.174835 | 0.279377 | -5.51993 |
| SYNCRIP   | -0.35222 | 0.176724 | -1.41706 | 0.171959 | 0.275793 | -5.52013 |
| MAMDC2    | 0.491457 | -0.25026 | 1.416924 | 0.171998 | 0.275833 | -5.52031 |
| MTMR11    | 0.512805 | -0.11931 | 1.416541 | 0.172108 | 0.275965 | -5.52082 |
| SLC27A5   | 0.494507 | -0.24134 | 1.416476 | 0.172127 | 0.275973 | -5.5209  |
| RUNDC2C   | -0.41994 | 0.692037 | -1.41631 | 0.172176 | 0.276028 | -5.52112 |
| SLC25A45  | 0.339233 | -0.26617 | 1.416148 | 0.172222 | 0.276079 | -5.52133 |
| TDRD6     | 0.479627 | -0.24068 | 1.200424 | 0.247593 | 0.365091 | -5.52155 |

|           |          |          |          |          |          |          |
|-----------|----------|----------|----------|----------|----------|----------|
| LOC100507 | 0.747141 | -0.59304 | 1.41592  | 0.172288 | 0.276162 | -5.52163 |
| RNF24     | -0.4854  | 0.491423 | -1.41565 | 0.172366 | 0.276265 | -5.52199 |
| ZNF645    | 0.238304 | -0.07997 | 1.415489 | 0.172412 | 0.276316 | -5.5222  |
| SPEM1     | 0.220455 | -0.32122 | 1.415441 | 0.172426 | 0.276316 | -5.52227 |
| ZNF433    | -0.24533 | 0.15133  | -1.41538 | 0.172443 | 0.276321 | -5.52234 |
| BAGE4     | 0.480316 | -0.49319 | 1.415317 | 0.172462 | 0.276329 | -5.52243 |
| VSIG2     | 0.310947 | -0.0943  | 1.415256 | 0.17248  | 0.276334 | -5.52251 |
| NUP210    | -0.52243 | 0.920156 | -1.41516 | 0.172508 | 0.276356 | -5.52264 |
| CNN3      | -0.58276 | 0.237603 | -1.37071 | 0.187443 | 0.29493  | -5.52283 |
| PFDN4     | -0.58397 | -0.31217 | -1.34079 | 0.200119 | 0.310192 | -5.52319 |
| IL18      | -0.63285 | 0.556464 | -1.41468 | 0.172645 | 0.276554 | -5.52326 |
| ANKRD43   | 0.279392 | -0.1097  | 1.414328 | 0.172748 | 0.27669  | -5.52373 |
| LTBP3     | 0.410868 | 0.216375 | 1.414169 | 0.172794 | 0.276691 | -5.52394 |
| TMEM194   | -0.29404 | 0.240786 | -1.41412 | 0.172808 | 0.276691 | -5.524   |
| KLHL29    | -0.34899 | 0.246693 | -1.4141  | 0.172815 | 0.276691 | -5.52404 |
| FAM82A1   | -0.39858 | 0.039246 | -1.41324 | 0.173063 | 0.27702  | -5.52516 |
| LOC100128 | -0.22561 | 0.016984 | -1.41276 | 0.173204 | 0.277222 | -5.5258  |
| MUC7      | 0.245674 | -0.37727 | 1.412373 | 0.173315 | 0.277355 | -5.52631 |
| PPRC1     | 0.363831 | 0.030547 | 1.411995 | 0.173425 | 0.277497 | -5.5268  |
| COQ4      | 0.308656 | -0.06139 | 1.411971 | 0.173432 | 0.277497 | -5.52683 |
| PIN1P1    | -0.21266 | 0.150361 | -1.41189 | 0.173455 | 0.277511 | -5.52694 |
| ZNF597    | -0.46452 | 0.275397 | -1.41156 | 0.173551 | 0.277619 | -5.52737 |
| FGFBP3    | 0.360355 | 0.017262 | 1.411307 | 0.173625 | 0.277715 | -5.52771 |
| LOC100507 | 0.593044 | 0.133949 | 1.403925 | 0.17659  | 0.281747 | -5.52778 |
| LOC100507 | -0.20915 | 0.058362 | -1.41119 | 0.17366  | 0.277749 | -5.52787 |
| VCAM1     | 0.677503 | -0.05734 | 1.373355 | 0.185745 | 0.292869 | -5.52827 |
| HPCAL1    | -0.27481 | 0.523544 | -1.41059 | 0.173835 | 0.278005 | -5.52865 |
| RETSAT    | -0.37361 | 0.446118 | -1.41022 | 0.173942 | 0.278153 | -5.52914 |
| ALS2CR8   | -0.72016 | 0.277785 | -1.40987 | 0.174043 | 0.278292 | -5.52959 |
| ADCY8     | 0.37411  | 0.07611  | 1.402435 | 0.177027 | 0.282164 | -5.52972 |
| LOC100507 | -0.24569 | -0.03398 | -1.40935 | 0.174194 | 0.278512 | -5.53028 |
| ZNF239    | -0.61955 | 0.535095 | -1.37157 | 0.186291 | 0.293542 | -5.53055 |
| LOC220906 | -0.26039 | -0.03011 | -1.40878 | 0.174362 | 0.278757 | -5.53103 |
| VENTX     | 0.430546 | 0.057548 | 1.371124 | 0.186428 | 0.293686 | -5.53112 |
| HIST1H1D  | 0.375389 | -0.47887 | 1.408663 | 0.174395 | 0.278788 | -5.53118 |
| BAX       | -0.35642 | 0.221738 | -1.40832 | 0.174495 | 0.278924 | -5.53163 |
| NFXL1     | 0.551133 | -0.03469 | 1.408076 | 0.174567 | 0.279016 | -5.53195 |
| DAOA      | 0.2965   | 0.079041 | 1.407195 | 0.174824 | 0.279377 | -5.53311 |
| NME7      | -0.31465 | 0.33385  | -1.40654 | 0.175015 | 0.27962  | -5.53396 |
| EIF2AK4   | -0.26577 | 0.3232   | -1.40654 | 0.175016 | 0.27962  | -5.53396 |
| GRB14     | 0.409911 | -0.11216 | 1.368281 | 0.187301 | 0.294824 | -5.53475 |
| JMJD6     | -0.60889 | 0.690786 | -1.40522 | 0.175403 | 0.280179 | -5.5357  |
| ZMPSTE24  | -0.41458 | -0.37573 | -1.4052  | 0.175409 | 0.280179 | -5.53572 |
| PKD2L2    | -0.18297 | 0.036594 | -1.40512 | 0.175431 | 0.280192 | -5.53582 |
| KCNA6     | -0.2851  | -0.00897 | -1.38883 | 0.181956 | 0.288334 | -5.53615 |
| RNF103    | -0.25094 | 0.081905 | -1.40478 | 0.17553  | 0.280327 | -5.53627 |
| CHD1L     | -0.2912  | 0.3133   | -1.40471 | 0.175553 | 0.280341 | -5.53637 |

|           |          |          |          |          |          |          |
|-----------|----------|----------|----------|----------|----------|----------|
| SNX25     | -0.51298 | 0.714713 | -1.40438 | 0.175648 | 0.28047  | -5.53679 |
| SCNN1A    | -0.52129 | 0.493912 | -1.40405 | 0.175745 | 0.280601 | -5.53722 |
| CAND2     | 0.441804 | -0.20419 | 1.403518 | 0.175902 | 0.280829 | -5.53792 |
| HOXB5     | -0.30724 | -0.0215  | -1.38709 | 0.182478 | 0.288951 | -5.5384  |
| UBE3A     | -0.20188 | 0.084331 | -1.403   | 0.176053 | 0.281048 | -5.5386  |
| IL10      | -0.3798  | 0.063816 | -1.40257 | 0.17618  | 0.281228 | -5.53916 |
| SETMAR    | -0.36383 | 0.260835 | -1.40245 | 0.176217 | 0.281263 | -5.53932 |
| MAGEA1    | -0.21489 | 0.017215 | -1.40218 | 0.176295 | 0.281365 | -5.53967 |
| RFPL4B    | -0.43156 | 0.237828 | -1.38567 | 0.182903 | 0.28939  | -5.54022 |
| CMAS      | 0.567406 | 0.063688 | 1.363494 | 0.188778 | 0.296682 | -5.54085 |
| LAMC2     | 0.493707 | -0.22422 | 1.40118  | 0.17659  | 0.281747 | -5.54098 |
| BMP1      | -0.27876 | 0.123108 | -1.40117 | 0.176592 | 0.281747 | -5.54099 |
| KCTD3     | -0.51004 | -0.03448 | -1.39352 | 0.179664 | 0.28544  | -5.54132 |
| LOC100501 | -0.21346 | -0.02166 | -1.40077 | 0.176711 | 0.281892 | -5.54152 |
| TUBB6     | -0.58471 | 0.713133 | -1.40056 | 0.176771 | 0.281942 | -5.54179 |
| PDK2      | 0.287379 | 0.137789 | 1.400502 | 0.17679  | 0.281948 | -5.54187 |
| RRP9      | 0.409841 | -0.04462 | 1.400355 | 0.176833 | 0.281994 | -5.54206 |
| GUCY2D    | -0.27801 | 0.180897 | -1.39293 | 0.179839 | 0.285649 | -5.54208 |
| RGAG4     | 0.551061 | -0.0552  | 1.384122 | 0.183369 | 0.289917 | -5.54222 |
| LOC100133 | -0.37462 | 0.020641 | -1.40021 | 0.176875 | 0.282015 | -5.54224 |
| BCL7A     | -0.61103 | 0.751078 | -1.40019 | 0.176882 | 0.282015 | -5.54227 |
| COX18     | -0.4843  | 0.153825 | -1.40016 | 0.176891 | 0.282015 | -5.54231 |
| N4BP2L1   | -0.40073 | 0.005322 | -1.40012 | 0.176903 | 0.282015 | -5.54237 |
| LINC00326 | -0.14463 | 0.026643 | -1.36229 | 0.189151 | 0.297164 | -5.54238 |
| CRHBP     | -0.5769  | 0.499676 | -1.39997 | 0.176947 | 0.282062 | -5.54256 |
| ZNF101    | -0.37302 | 0.080539 | -1.39962 | 0.17705  | 0.282164 | -5.54302 |
| LOC149831 | -0.20313 | 0.077193 | -1.39961 | 0.177054 | 0.282164 | -5.54304 |
| SLC17A6   | -0.44532 | 0.276184 | -1.39198 | 0.180123 | 0.285892 | -5.54332 |
| MET       | -0.49634 | 0.352176 | -1.39933 | 0.177135 | 0.282224 | -5.5434  |
| FGFR1     | -0.56129 | 0.687335 | -1.39933 | 0.177136 | 0.282224 | -5.5434  |
| GLRX3     | -0.35471 | -0.01333 | -1.3992  | 0.177173 | 0.282262 | -5.54356 |
| TGM5      | -0.29195 | -0.28464 | -1.36118 | 0.189495 | 0.297538 | -5.54379 |
| PNP       | 0.376418 | -0.03496 | 1.398624 | 0.177344 | 0.282492 | -5.54432 |
| NSUN4     | -0.21318 | 0.326798 | -1.39861 | 0.177348 | 0.282492 | -5.54433 |
| TBX22     | -0.10579 | 0.021159 | -1.39857 | 0.177361 | 0.282492 | -5.54439 |
| CRELD2    | 0.226734 | -0.0014  | 1.398476 | 0.177388 | 0.282512 | -5.54451 |
| TMC6      | -0.21131 | 0.333886 | -1.39827 | 0.177449 | 0.282567 | -5.54478 |
| DDX27     | 0.268317 | -0.07614 | 1.398215 | 0.177465 | 0.282567 | -5.54485 |
| ALDH18A1  | 0.405028 | -0.07613 | 1.398213 | 0.177466 | 0.282567 | -5.54485 |
| LOC100509 | -0.28643 | 0.006695 | -1.39802 | 0.177523 | 0.282634 | -5.54511 |
| EID2      | -0.42673 | 0.412392 | -1.39746 | 0.177688 | 0.282875 | -5.54583 |
| R3HDM1    | 0.303832 | -0.0405  | 1.351957 | 0.193258 | 0.302211 | -5.54658 |
| CCDC13    | -0.35089 | 0.169453 | -1.39684 | 0.177871 | 0.283099 | -5.54664 |
| ACLY      | -0.20864 | 0.149808 | -1.3966  | 0.177943 | 0.283188 | -5.54695 |
| TBC1D22A  | -0.1735  | 0.186382 | -1.39647 | 0.177982 | 0.283217 | -5.54712 |
| NRXN2     | 0.438054 | 0.266655 | 1.396444 | 0.17799  | 0.283217 | -5.54716 |
| AKAP10    | -0.39257 | 0.197337 | -1.39621 | 0.17806  | 0.283283 | -5.54747 |

|           |          |          |          |          |          |          |
|-----------|----------|----------|----------|----------|----------|----------|
| ABCD4     | -0.17701 | 0.035402 | -1.39614 | 0.178079 | 0.28329  | -5.54755 |
| TUSC5     | -0.47821 | 0.352966 | -1.39558 | 0.178246 | 0.28351  | -5.54829 |
| MAGED1    | 0.43271  | -0.03777 | 1.395123 | 0.178382 | 0.283703 | -5.54888 |
| FIZ1      | -0.25645 | 0.523417 | -1.39505 | 0.178403 | 0.283713 | -5.54897 |
| KIF11     | -0.9213  | 0.831401 | -1.39499 | 0.178422 | 0.283721 | -5.54906 |
| LOC100507 | -0.37065 | 0.144677 | -1.38744 | 0.181482 | 0.287769 | -5.5492  |
| PPARGC1A  | -0.42911 | -0.02085 | -1.39471 | 0.178506 | 0.28383  | -5.54942 |
| S100A6    | -0.37148 | 0.258128 | -1.39454 | 0.178557 | 0.283888 | -5.54965 |
| ACTR1B    | 0.23715  | -0.0882  | 1.393595 | 0.178837 | 0.284311 | -5.55087 |
| NOL11     | 0.316865 | -0.29645 | 1.392861 | 0.179056 | 0.284635 | -5.55183 |
| NAA15     | 0.280589 | -0.17935 | 1.392111 | 0.179279 | 0.284967 | -5.5528  |
| MAML2     | 0.384977 | -0.00898 | 1.307656 | 0.207569 | 0.319013 | -5.55285 |
| PRCP      | -0.33345 | 0.169965 | -1.39202 | 0.179305 | 0.284985 | -5.55291 |
| PGLS      | -0.19623 | 0.367843 | -1.39183 | 0.179363 | 0.285022 | -5.55317 |
| LRRC18    | -0.22935 | -0.07041 | -1.3918  | 0.179372 | 0.285022 | -5.5532  |
| POM121L1  | 0.39775  | -0.2699  | 1.391801 | 0.179372 | 0.285022 | -5.55321 |
| CAMSAP1   | 0.35851  | -0.44948 | 1.201716 | 0.252911 | 0.37084  | -5.55412 |
| EBNA1BP2  | -0.32187 | 0.196053 | -1.39065 | 0.179714 | 0.285482 | -5.55469 |
| SLC25A18  | -0.39051 | -0.07282 | -1.39017 | 0.179859 | 0.285657 | -5.55532 |
| KIAA0195  | -0.25514 | 0.529109 | -1.38988 | 0.179945 | 0.285748 | -5.5557  |
| FAM86C1   | -0.39472 | 0.392273 | -1.38981 | 0.179967 | 0.28576  | -5.55579 |
| RCOR1     | 0.373628 | -0.51391 | 1.389712 | 0.179996 | 0.285783 | -5.55592 |
| TALDO1    | -0.48312 | 0.522099 | -1.38955 | 0.180046 | 0.285838 | -5.55613 |
| FUS       | -0.29021 | 0.177927 | -1.38949 | 0.180063 | 0.285843 | -5.55621 |
| MELK      | -0.68621 | 0.495414 | -1.3893  | 0.18012  | 0.285892 | -5.55645 |
| CD28      | 0.65309  | -0.56491 | 1.381285 | 0.183335 | 0.289903 | -5.55714 |
| PSMB7     | -0.24016 | 0.144583 | -1.38831 | 0.180417 | 0.286336 | -5.55774 |
| PLK5      | -0.30575 | 0.077559 | -1.38809 | 0.180481 | 0.286413 | -5.55802 |
| DACH2     | -0.31672 | -0.00018 | -1.38801 | 0.180507 | 0.286431 | -5.55813 |
| SNRPF     | 0.516111 | -0.09631 | 1.387928 | 0.180531 | 0.286446 | -5.55823 |
| DEPDC5    | -0.37264 | 0.294022 | -1.38718 | 0.180755 | 0.286778 | -5.5592  |
| SEC14L5   | 0.75267  | 0.005524 | 1.134893 | 0.278827 | 0.399513 | -5.55984 |
| KIAA0913  | 0.269127 | 0.090782 | 1.38669  | 0.180902 | 0.286989 | -5.55984 |
| LOC100508 | 0.239889 | -0.26408 | 1.379103 | 0.183995 | 0.290672 | -5.55995 |
| LOC100506 | -0.35187 | 0.260579 | -1.38605 | 0.181094 | 0.28727  | -5.56067 |
| TWISTNB   | -0.37728 | -0.08362 | -1.34779 | 0.193688 | 0.302787 | -5.56072 |
| LPA       | -0.31296 | 0.101491 | -1.38572 | 0.181195 | 0.287407 | -5.5611  |
| TMEM121   | 0.445283 | -0.15864 | 1.385298 | 0.181321 | 0.287583 | -5.56164 |
| FAM92A3   | 0.279149 | -0.68325 | 1.385068 | 0.18139  | 0.28767  | -5.56194 |
| GPR137C   | -0.40827 | 0.078184 | -1.38481 | 0.181469 | 0.287769 | -5.56228 |
| CGNL1     | -0.34613 | -0.00611 | -1.35786 | 0.192398 | 0.301057 | -5.56236 |
| EEF1E1    | -0.64284 | -0.45236 | -1.38458 | 0.181538 | 0.287834 | -5.56257 |
| SERPINB2  | -0.36352 | -0.17312 | -1.38389 | 0.181745 | 0.288138 | -5.56346 |
| INTS7     | -0.48118 | 0.727139 | -1.38376 | 0.181784 | 0.288175 | -5.56363 |
| SPRY3     | 0.326966 | -0.3796  | 1.383718 | 0.181797 | 0.288175 | -5.56369 |
| MECR      | 0.325322 | -0.13655 | 1.383614 | 0.181829 | 0.288201 | -5.56382 |
| ESRRB     | -0.28608 | -0.15662 | -1.38357 | 0.181843 | 0.288201 | -5.56388 |

|           |          |          |          |          |          |          |
|-----------|----------|----------|----------|----------|----------|----------|
| EFNA1     | -0.45365 | 0.441575 | -1.38342 | 0.181887 | 0.288247 | -5.56407 |
| CEP97     | -0.51068 | 0.298713 | -1.38303 | 0.182004 | 0.288386 | -5.56457 |
| PKP4      | -0.25987 | 0.06838  | -1.37539 | 0.185124 | 0.292169 | -5.56472 |
| PTP4A1    | -0.38116 | 0.165337 | -1.38275 | 0.18209  | 0.2885   | -5.56494 |
| TRAPPC2   | -0.38788 | 0.30199  | -1.37515 | 0.185197 | 0.29224  | -5.56502 |
| RPS27     | 0.907054 | -1.09282 | 1.382643 | 0.182122 | 0.288526 | -5.56508 |
| LPCAT4    | 0.26404  | 0.082105 | 1.382595 | 0.182136 | 0.288526 | -5.56514 |
| PCDHB8    | 0.19605  | -0.27846 | 1.337121 | 0.197961 | 0.307665 | -5.56519 |
| CRTAC1    | -0.37574 | -0.07172 | -1.38249 | 0.182166 | 0.28855  | -5.56527 |
| COL6A6    | -0.33139 | 0.080703 | -1.36595 | 0.188907 | 0.296827 | -5.56548 |
| C7orf53   | -0.70153 | 1.10923  | -1.38229 | 0.182227 | 0.288623 | -5.56553 |
| CD93      | -0.49582 | 0.260197 | -1.38204 | 0.182304 | 0.288721 | -5.56585 |
| SLC9A11   | 0.390997 | -0.15242 | 1.38168  | 0.182413 | 0.288871 | -5.56632 |
| SPINK2    | 0.796273 | -0.40756 | 1.13884  | 0.275532 | 0.396125 | -5.56639 |
| ZNF559    | -0.48134 | 0.236187 | -1.38112 | 0.182581 | 0.28909  | -5.56704 |
| RPL3      | 0.524472 | -0.31722 | 1.381053 | 0.182603 | 0.289101 | -5.56713 |
| USP32P1   | -0.86812 | 0.560247 | -1.37341 | 0.18573  | 0.292869 | -5.56726 |
| TCERG1    | -0.41204 | 0.179215 | -1.38091 | 0.182646 | 0.289147 | -5.56732 |
| CRAT      | -0.35064 | 0.607941 | -1.38086 | 0.182662 | 0.289148 | -5.56738 |
| RFPL3-AS1 | -0.59174 | 0.574802 | -1.38059 | 0.182742 | 0.289235 | -5.56773 |
| ING5      | -0.34426 | 0.443192 | -1.38058 | 0.182746 | 0.289235 | -5.56774 |
| ITGB8     | -0.1676  | 0.03352  | -1.3804  | 0.1828   | 0.289296 | -5.56797 |
| CHD4      | -0.2763  | 0.433919 | -1.38031 | 0.182829 | 0.289296 | -5.5681  |
| DNASE2B   | 0.611724 | -0.47012 | 1.363853 | 0.189553 | 0.297604 | -5.56814 |
| C12orf54  | 0.361948 | -0.30601 | 1.379487 | 0.183077 | 0.289642 | -5.56915 |
| DTNB      | 0.203301 | -0.19438 | 1.379275 | 0.183142 | 0.28969  | -5.56943 |
| FUCA2     | 0.252369 | -0.37695 | 1.379235 | 0.183154 | 0.28969  | -5.56948 |
| PDZRN4    | -0.30288 | -0.03501 | -1.37918 | 0.183169 | 0.28969  | -5.56954 |
| SLC2A1    | -0.34351 | 0.579604 | -1.37916 | 0.183175 | 0.28969  | -5.56957 |
| P2RX6P    | -0.48758 | 0.217842 | -1.37914 | 0.183181 | 0.28969  | -5.5696  |
| FONG      | 0.321148 | -0.07589 | 1.371388 | 0.186347 | 0.293606 | -5.56985 |
| MIOS      | -0.16866 | -0.09856 | -1.3786  | 0.183346 | 0.289903 | -5.57029 |
| UNC13B    | -0.27159 | -0.08127 | -1.3781  | 0.183497 | 0.290077 | -5.57093 |
| BCL11B    | -0.16632 | 0.033263 | -1.37809 | 0.1835   | 0.290077 | -5.57095 |
| NFIX      | 0.205545 | 0.01646  | 1.377914 | 0.183555 | 0.29014  | -5.57118 |
| RBM15     | -0.2436  | 0.430372 | -1.37758 | 0.183658 | 0.290279 | -5.57162 |
| PSMB5     | -0.18435 | 0.060458 | -1.37735 | 0.183727 | 0.290365 | -5.57191 |
| ERBB4     | -0.38366 | 0.155458 | -1.37715 | 0.183788 | 0.29042  | -5.57217 |
| C4orf47   | 0.462011 | -0.09569 | 1.338673 | 0.196587 | 0.306    | -5.57218 |
| SPG20OS   | -0.2737  | 0.111942 | -1.37714 | 0.183792 | 0.29042  | -5.57218 |
| LOC100321 | -0.33146 | 0.183848 | -1.36939 | 0.18696  | 0.294359 | -5.57241 |
| RPS19BP1  | -0.20586 | 0.081237 | -1.37666 | 0.183937 | 0.290611 | -5.5728  |
| ORC1      | -0.37465 | 0.512548 | -1.37664 | 0.183942 | 0.290611 | -5.57282 |
| LOC100287 | -0.30826 | -0.23857 | -1.36902 | 0.187074 | 0.294515 | -5.57288 |
| METAP1    | -0.46166 | 0.526619 | -1.37638 | 0.184023 | 0.290693 | -5.57316 |
| LOC126536 | 0.421129 | -0.4338  | 1.299803 | 0.213464 | 0.326196 | -5.57334 |
| NDUFAF3   | 0.338105 | 0.005408 | 1.375452 | 0.184304 | 0.291113 | -5.57435 |

|           |          |          |          |          |          |          |
|-----------|----------|----------|----------|----------|----------|----------|
| CNTNAP3B  | -0.39891 | 0.12433  | -1.37532 | 0.184346 | 0.291155 | -5.57452 |
| TRIM73    | -0.16477 | 0.032954 | -1.37525 | 0.184366 | 0.291163 | -5.57461 |
| YARS2     | -0.23606 | 0.209415 | -1.37508 | 0.184418 | 0.291219 | -5.57483 |
| PPP1R16B  | 0.385904 | -0.14098 | 1.375039 | 0.184431 | 0.291219 | -5.57488 |
| SLC30A8   | 0.461358 | -0.21681 | 1.347731 | 0.195572 | 0.304879 | -5.57511 |
| PPM1L     | -0.16451 | 0.032902 | -1.37477 | 0.184512 | 0.291325 | -5.57523 |
| CBX8      | 0.205304 | 0.026332 | 1.374221 | 0.184681 | 0.291566 | -5.57594 |
| PCDHA1    | 0.335121 | -0.18055 | 1.373718 | 0.184834 | 0.291785 | -5.57658 |
| RRH       | -0.27266 | -0.0836  | -1.37321 | 0.184988 | 0.292005 | -5.57723 |
| CCDC11    | 0.559523 | -0.32046 | 1.334599 | 0.197893 | 0.307604 | -5.57728 |
| PREP      | 0.218534 | -0.08222 | 1.372877 | 0.185092 | 0.292145 | -5.57766 |
| PRKG2     | 0.151311 | -0.00886 | 1.372729 | 0.185137 | 0.292169 | -5.57785 |
| CEBPE     | -0.67072 | 0.686885 | -1.37241 | 0.185233 | 0.292275 | -5.57826 |
| MDS2      | 0.659539 | -0.04047 | 1.326439 | 0.201402 | 0.311737 | -5.57848 |
| CLEC4G    | -0.5545  | 0.589355 | -1.3722  | 0.185299 | 0.292355 | -5.57854 |
| FAF1      | 0.236167 | -0.11549 | 1.372077 | 0.185336 | 0.29239  | -5.57869 |
| HIPK2     | -0.48839 | 0.43271  | -1.37178 | 0.185426 | 0.292508 | -5.57907 |
| C6orf226  | -0.31024 | 0.190637 | -1.37169 | 0.185454 | 0.292528 | -5.57918 |
| RBM10     | 0.207516 | -0.00648 | 1.371317 | 0.185569 | 0.292687 | -5.57967 |
| NR2F6     | 0.289931 | 0.116461 | 1.371188 | 0.185609 | 0.292725 | -5.57983 |
| PLEKHG4   | -0.2665  | 0.067856 | -1.37079 | 0.185732 | 0.292869 | -5.58035 |
| SLED1     | -0.55403 | 0.364078 | -1.37059 | 0.185791 | 0.292916 | -5.5806  |
| ECH1      | -0.23022 | 0.381034 | -1.37055 | 0.185805 | 0.292916 | -5.58065 |
| HLA-G     | -0.28162 | 0.167226 | -1.37017 | 0.185922 | 0.293062 | -5.58114 |
| PTRF      | 0.504614 | -0.12836 | 1.370131 | 0.185933 | 0.293062 | -5.58119 |
| SLC3A2    | -0.27698 | 0.351695 | -1.3701  | 0.185942 | 0.293062 | -5.58123 |
| MXD4      | -0.32812 | 0.591732 | -1.36978 | 0.186042 | 0.293196 | -5.58164 |
| HOXD1     | -0.31546 | 0.067985 | -1.36905 | 0.186265 | 0.293525 | -5.58258 |
| DPAGT1    | -0.23354 | 0.38059  | -1.36866 | 0.186385 | 0.293642 | -5.58307 |
| TRAF3     | -0.25545 | 0.393922 | -1.36834 | 0.186484 | 0.293741 | -5.58349 |
| VNN3      | -0.73355 | 0.852512 | -1.3683  | 0.186497 | 0.293741 | -5.58354 |
| CSAG2     | 0.228953 | -0.21983 | 1.368264 | 0.186508 | 0.293741 | -5.58359 |
| C19orf39  | -0.25488 | 0.021155 | -1.3682  | 0.186528 | 0.293749 | -5.58367 |
| PPP1R3F   | -0.28897 | 0.32932  | -1.3678  | 0.186651 | 0.293919 | -5.58418 |
| AMELX     | 0.210517 | -0.07512 | 1.367348 | 0.18679  | 0.294114 | -5.58476 |
| MT4       | -0.37631 | 0.211863 | -1.32817 | 0.199969 | 0.310057 | -5.5853  |
| MPL       | 0.500606 | -0.06918 | 1.365754 | 0.187282 | 0.294818 | -5.5868  |
| ATAD2     | -0.51645 | 0.214112 | -1.36559 | 0.187333 | 0.294851 | -5.58701 |
| NLRX1     | -0.28963 | 0.543529 | -1.36545 | 0.187376 | 0.294895 | -5.58719 |
| ATP5S     | -0.33292 | -0.18926 | -1.36537 | 0.187399 | 0.294908 | -5.58729 |
| C20orf196 | -0.23804 | 0.139621 | -1.36527 | 0.187431 | 0.29493  | -5.58742 |
| ZNF146    | -0.57679 | 0.500291 | -1.36474 | 0.187595 | 0.295144 | -5.58809 |
| NFKBIL1   | 0.283352 | -0.27433 | 1.364196 | 0.187763 | 0.295386 | -5.58879 |
| SNAP47    | -0.29617 | 0.242975 | -1.36414 | 0.187779 | 0.295388 | -5.58886 |
| MRPS16    | -0.26099 | 0.108669 | -1.36393 | 0.187846 | 0.295469 | -5.58913 |
| LOC100133 | 0.505468 | -0.41498 | 1.363601 | 0.187948 | 0.295605 | -5.58955 |
| PRR4      | -0.27476 | 0.035381 | -1.36347 | 0.187988 | 0.295645 | -5.58972 |

|           |          |          |          |          |          |          |
|-----------|----------|----------|----------|----------|----------|----------|
| KLK8      | -0.42977 | 0.025645 | -1.35555 | 0.19125  | 0.299741 | -5.59004 |
| MAPK8IP3  | -0.38856 | 0.085069 | -1.3626  | 0.188258 | 0.296035 | -5.59083 |
| OR10H4    | -0.20402 | -0.13987 | -1.36255 | 0.188274 | 0.296035 | -5.5909  |
| SIM1      | 0.178656 | -0.32221 | 1.362524 | 0.188281 | 0.296035 | -5.59093 |
| RUNX1     | -0.61512 | 0.321565 | -1.36223 | 0.188372 | 0.296153 | -5.5913  |
| EAFF1     | -0.63981 | 0.441771 | -1.36196 | 0.188457 | 0.296263 | -5.59165 |
| EXTL2     | -0.53086 | 0.039799 | -1.36165 | 0.188552 | 0.29639  | -5.59204 |
| RPS6KA6   | 0.280581 | -0.13268 | 1.314838 | 0.205194 | 0.316306 | -5.59282 |
| IQCF5     | -0.66132 | 0.568691 | -1.32204 | 0.201962 | 0.312332 | -5.59292 |
| PLAG1     | -0.54614 | -0.21833 | -1.35324 | 0.191972 | 0.300632 | -5.59296 |
| DLST      | -0.44954 | 0.173037 | -1.36092 | 0.188779 | 0.296682 | -5.59297 |
| OLA1      | -0.30691 | -0.0738  | -1.36091 | 0.188784 | 0.296682 | -5.59299 |
| ALOX12    | 0.531998 | 0.19126  | 1.360782 | 0.188823 | 0.296719 | -5.59315 |
| FAM71F2   | 0.280688 | -0.06086 | 1.360264 | 0.188984 | 0.296924 | -5.59381 |
| FOXJ2     | 0.296909 | -0.17169 | 1.359573 | 0.189199 | 0.297215 | -5.59469 |
| MBD3L2    | -0.55042 | -0.26215 | -1.28173 | 0.219569 | 0.333326 | -5.59506 |
| C10orf93  | -0.33874 | 0.225919 | -1.35928 | 0.189289 | 0.29731  | -5.59507 |
| CHST8     | -0.55943 | 0.603222 | -1.35914 | 0.189334 | 0.297356 | -5.59525 |
| ALKBH3    | -0.37638 | 0.16042  | -1.35893 | 0.189398 | 0.297432 | -5.59551 |
| FAM93B    | -0.598   | 0.34679  | -1.35115 | 0.19263  | 0.301348 | -5.59561 |
| PKDCC     | 0.231146 | -0.26137 | 1.358712 | 0.189467 | 0.297517 | -5.59579 |
| TBC1D30   | 0.347046 | -0.10887 | 1.341559 | 0.196545 | 0.305958 | -5.59629 |
| C12orf43  | -0.32128 | 0.449972 | -1.3581  | 0.189657 | 0.297743 | -5.59657 |
| ANGPT4    | 0.199379 | -0.20034 | 1.357647 | 0.189799 | 0.297935 | -5.59715 |
| TPMT      | -0.57575 | 0.383514 | -1.35745 | 0.189861 | 0.297992 | -5.5974  |
| CYP2C8    | 0.381929 | -0.03592 | 1.311092 | 0.20643  | 0.317811 | -5.59742 |
| EYS       | 0.103809 | -0.02307 | 1.340158 | 0.196991 | 0.306507 | -5.59805 |
| ARHGAP23  | -0.33229 | 0.217389 | -1.35692 | 0.190027 | 0.298229 | -5.59808 |
| SUSD2     | 0.351104 | 0.002285 | 1.356867 | 0.190043 | 0.29823  | -5.59814 |
| TRMT1     | 0.217816 | 0.003815 | 1.35673  | 0.190086 | 0.298274 | -5.59832 |
| EMID1     | 0.528714 | 0.047532 | 1.356648 | 0.190112 | 0.29829  | -5.59842 |
| CRYZL1    | -0.41003 | 0.481957 | -1.31    | 0.206792 | 0.318218 | -5.59877 |
| C4orf39   | -0.58515 | 0.024778 | -1.35636 | 0.190202 | 0.298408 | -5.59879 |
| LOC100128 | 0.344269 | -0.70471 | 1.356191 | 0.190254 | 0.298466 | -5.599   |
| TBRG4     | 0.272847 | -0.00748 | 1.355837 | 0.190365 | 0.298616 | -5.59945 |
| FLJ43826  | -0.33894 | 0.304455 | -1.35577 | 0.190386 | 0.298625 | -5.59954 |
| SLC6A15   | -0.2652  | -0.12967 | -1.35543 | 0.190494 | 0.29877  | -5.59997 |
| RPS17     | 0.796411 | -1.16748 | 1.355217 | 0.190559 | 0.298849 | -5.60024 |
| HOOK1     | 0.518207 | -0.25558 | 1.355132 | 0.190586 | 0.298867 | -5.60035 |
| SLC16A7   | 0.270182 | 0.022584 | 1.34663  | 0.194056 | 0.30312  | -5.60132 |
| PPP1R3C   | 0.216335 | -0.13588 | 1.353955 | 0.190955 | 0.299422 | -5.60185 |
| KCNE3     | -0.54407 | 0.305632 | -1.35383 | 0.190995 | 0.299461 | -5.60201 |
| ESR2      | 0.178134 | 0.022423 | 1.353754 | 0.191018 | 0.299472 | -5.6021  |
| HIPK3     | -0.37165 | -0.2639  | -1.35358 | 0.191073 | 0.299522 | -5.60232 |
| RPL18A    | 0.427586 | -0.18774 | 1.35342  | 0.191123 | 0.299565 | -5.60252 |
| ALKBH2    | 0.471649 | -0.21109 | 1.352744 | 0.191335 | 0.29985  | -5.60338 |
| SNHG13    | -0.33587 | 0.513416 | -1.3519  | 0.1916   | 0.300217 | -5.60445 |

|           |          |          |          |          |          |          |
|-----------|----------|----------|----------|----------|----------|----------|
| MRE11A    | -0.45506 | 0.297555 | -1.35168 | 0.191671 | 0.300291 | -5.60474 |
| ZNF468    | -0.30437 | -0.1912  | -1.35165 | 0.191678 | 0.300291 | -5.60477 |
| ARHGAP17  | 0.273291 | -0.00676 | 1.351339 | 0.191777 | 0.300422 | -5.60517 |
| C6orf203  | -0.47369 | 0.721186 | -1.35109 | 0.191857 | 0.300523 | -5.60549 |
| ZSCAN4    | 0.330484 | -0.08953 | 1.350921 | 0.191909 | 0.30058  | -5.6057  |
| KIAA1524  | -0.26373 | -0.10109 | -1.35083 | 0.191937 | 0.300601 | -5.60581 |
| BBS10     | -0.49613 | 0.06158  | -1.35058 | 0.192015 | 0.300674 | -5.60612 |
| FLJ45445  | -0.24145 | 0.150338 | -1.35029 | 0.192107 | 0.300786 | -5.6065  |
| PCYOX1L   | 0.26961  | 0.04974  | 1.350259 | 0.192117 | 0.300786 | -5.60654 |
| RSPRY1    | -0.37313 | -0.13446 | -1.34995 | 0.192214 | 0.300881 | -5.60693 |
| TWIST2    | -0.48285 | 0.175063 | -1.34993 | 0.19222  | 0.300881 | -5.60695 |
| NOP14     | 0.16939  | 0.004903 | 1.349856 | 0.192244 | 0.300881 | -5.60705 |
| CREBBP    | -0.50409 | 0.398208 | -1.34983 | 0.192254 | 0.300881 | -5.60708 |
| C12orf42  | 0.449697 | 0.069049 | 1.349825 | 0.192254 | 0.300881 | -5.60709 |
| LOC100506 | 0.35672  | 0.000855 | 1.349625 | 0.192317 | 0.300955 | -5.60734 |
| STK39     | 0.267143 | -0.23793 | 1.247    | 0.230494 | 0.345045 | -5.60769 |
| LOC28514  | -0.33511 | -0.08629 | -1.3492  | 0.192452 | 0.301118 | -5.60788 |
| LOC40004  | 0.231048 | -0.26591 | 1.348725 | 0.192601 | 0.301328 | -5.60848 |
| RAB3D     | -0.46336 | 0.288979 | -1.34847 | 0.192681 | 0.301404 | -5.6088  |
| KIAA1024L | -0.49164 | 0.033418 | -1.29273 | 0.213536 | 0.326265 | -5.60929 |
| LOC100506 | -0.15122 | 0.030243 | -1.34747 | 0.192999 | 0.301877 | -5.61007 |
| TTC3P1    | 0.416152 | 0.004192 | 1.347327 | 0.193043 | 0.301923 | -5.61025 |
| CKM       | -0.4192  | 0.637761 | -1.34722 | 0.193078 | 0.301953 | -5.61039 |
| LAMTOR3   | -0.4829  | 0.035989 | -1.34597 | 0.193474 | 0.302523 | -5.61197 |
| SLC48A1   | 0.380886 | -0.08644 | 1.34585  | 0.193511 | 0.302558 | -5.61212 |
| C5orf13   | -0.41008 | 0.434686 | -1.34535 | 0.193669 | 0.302781 | -5.61275 |
| DPCR1     | 0.316645 | -0.61505 | 1.304142 | 0.21079  | 0.32285  | -5.61286 |
| ZNRF2P1   | -0.60638 | 0.408592 | -1.34521 | 0.193713 | 0.302802 | -5.61293 |
| MRPS18C   | -0.53384 | -0.08652 | -1.34501 | 0.193779 | 0.302852 | -5.61319 |
| PAN3      | -0.29071 | -0.08492 | -1.34498 | 0.193786 | 0.302852 | -5.61321 |
| ING3      | -0.19863 | 0.016634 | -1.34493 | 0.193804 | 0.302852 | -5.61328 |
| SMPD3     | 0.8655   | 0.148674 | 1.344916 | 0.193807 | 0.302852 | -5.6133  |
| XAGE5     | 0.327551 | -0.0137  | 1.344867 | 0.193823 | 0.302852 | -5.61336 |
| LANCL3    | -0.46055 | 0.651795 | -1.34441 | 0.193969 | 0.303057 | -5.61394 |
| NR6A1     | 0.276596 | -0.10939 | 1.344315 | 0.193998 | 0.303078 | -5.61406 |
| TMEM150   | -0.33133 | 0.072563 | -1.33637 | 0.197324 | 0.306923 | -5.61422 |
| ZYG11B    | -0.13825 | 0.023526 | -1.34416 | 0.194046 | 0.30312  | -5.61425 |
| GNAQ      | -0.44984 | 0.197338 | -1.34405 | 0.194082 | 0.303136 | -5.61439 |
| TOMM20    | 0.359218 | -0.66225 | 1.343979 | 0.194105 | 0.303148 | -5.61448 |
| DNAJC21   | -0.38437 | 0.105593 | -1.34382 | 0.194156 | 0.3032   | -5.61468 |
| CHP2      | -0.21181 | -0.08872 | -1.34378 | 0.194169 | 0.3032   | -5.61474 |
| SRRB4D    | 0.449351 | -0.08949 | 1.343441 | 0.194276 | 0.303342 | -5.61516 |
| TAS2R1    | -0.3131  | 0.122946 | -1.34313 | 0.194375 | 0.303472 | -5.61555 |
| MIR1245A  | -0.19549 | 0.047892 | -1.34297 | 0.194424 | 0.303526 | -5.61575 |
| FAM155B   | -0.28537 | 0.006528 | -1.34226 | 0.194652 | 0.30385  | -5.61665 |
| NOD1      | -0.43307 | 0.583573 | -1.34222 | 0.194663 | 0.30385  | -5.6167  |
| RASL11A   | -0.42721 | 0.616246 | -1.34215 | 0.194688 | 0.303864 | -5.61679 |



|          |          |          |          |          |          |          |
|----------|----------|----------|----------|----------|----------|----------|
| GPM6A    | -0.39826 | -0.16485 | -1.26322 | 0.225965 | 0.340582 | -5.61706 |
| NEU3     | -0.20055 | -0.05266 | -1.3419  | 0.194767 | 0.303964 | -5.61711 |
| ZFP2     | -0.45632 | 0.245254 | -1.30239 | 0.208459 | 0.320231 | -5.61713 |
| KIAA1661 | 0.27565  | -0.34254 | 1.324781 | 0.201941 | 0.312332 | -5.61723 |
| ITGAL    | -0.33366 | 0.502599 | -1.34174 | 0.194817 | 0.304018 | -5.61731 |
| TRPC3    | -0.23772 | -0.17254 | -1.32448 | 0.202039 | 0.312401 | -5.61761 |
| C18orf19 | -0.37084 | 0.07331  | -1.34146 | 0.194906 | 0.304133 | -5.61766 |
| LOC38933 | -0.46912 | -0.5337  | -1.33356 | 0.198227 | 0.308014 | -5.61775 |
| ADIPOR2  | -0.11907 | -0.02216 | -1.34098 | 0.195059 | 0.304303 | -5.61826 |
| AATF     | -0.21364 | 0.249237 | -1.34097 | 0.195062 | 0.304303 | -5.61828 |
| CSF3     | 0.379029 | -0.29779 | 1.301165 | 0.20887  | 0.320762 | -5.61863 |
| SOD3     | 0.251037 | -0.37527 | 1.274477 | 0.220846 | 0.334771 | -5.61873 |
| KIAA1407 | -0.46248 | 0.318339 | -1.34049 | 0.195217 | 0.304497 | -5.61889 |
| PELI3    | 0.350347 | -0.23314 | 1.340312 | 0.195273 | 0.304538 | -5.61911 |
| TRAPPC2L | -0.28333 | 0.481887 | -1.34031 | 0.195275 | 0.304538 | -5.61912 |
| IDE      | -0.23819 | 0.042099 | -1.33957 | 0.195509 | 0.304854 | -5.62004 |
| PLCD3    | -0.44055 | 0.654716 | -1.3395  | 0.195532 | 0.304866 | -5.62013 |
| PLA2G1B  | -0.21784 | 0.034099 | -1.33942 | 0.195557 | 0.304879 | -5.62023 |
| TMED8    | -1.06895 | 0.232768 | -1.33141 | 0.198919 | 0.308844 | -5.62043 |
| SLC6A1   | -0.23594 | 0.044855 | -1.33922 | 0.195621 | 0.304933 | -5.62048 |
| SEZ6L    | 0.311471 | -0.18403 | 1.331303 | 0.198954 | 0.308875 | -5.62057 |
| ESRP1    | -0.22108 | 0.011968 | -1.33909 | 0.195665 | 0.304976 | -5.62065 |
| SCN1A    | -0.3251  | 0.108965 | -1.33121 | 0.198984 | 0.308881 | -5.62069 |
| ZCCHC11  | -0.30584 | 0.162852 | -1.33896 | 0.195706 | 0.304997 | -5.62081 |
| ATPBD4   | -0.38817 | 0.320865 | -1.33895 | 0.195709 | 0.304997 | -5.62083 |
| CDK16    | -0.25767 | 0.509129 | -1.33877 | 0.195766 | 0.305061 | -5.62105 |
| HMGA1    | -0.33693 | 0.216048 | -1.33859 | 0.195822 | 0.305111 | -5.62127 |
| C19orf28 | 0.312702 | 0.082679 | 1.338538 | 0.19584  | 0.305111 | -5.62134 |
| KRTCAP2  | 0.256757 | -0.25624 | 1.338525 | 0.195845 | 0.305111 | -5.62136 |
| PRDM14   | 0.335156 | -0.19311 | 1.298784 | 0.20967  | 0.321713 | -5.62155 |
| PROL1    | -0.20978 | -0.12594 | -1.32126 | 0.203087 | 0.313693 | -5.6216  |
| PRR15    | 0.317045 | -0.15844 | 1.338334 | 0.195905 | 0.305181 | -5.6216  |
| ZNF503   | 0.338459 | 0.043552 | 1.337994 | 0.196014 | 0.305327 | -5.62203 |
| NDNF     | 0.531701 | -0.27398 | 1.242879 | 0.230915 | 0.345544 | -5.62214 |
| KLHL36   | -0.27528 | 0.138463 | -1.33777 | 0.196085 | 0.305412 | -5.6223  |
| FLYWCH1  | 0.26108  | 0.16439  | 1.337501 | 0.196172 | 0.305524 | -5.62265 |
| ASAH2    | 0.283535 | -0.13914 | 1.309366 | 0.207969 | 0.319529 | -5.62271 |
| SMEK2    | 0.617589 | -0.15754 | 1.241945 | 0.231251 | 0.345809 | -5.62323 |
| ARRDC4   | -0.44933 | 0.162469 | -1.32917 | 0.199645 | 0.309653 | -5.62324 |
| CTSB     | -0.41582 | 0.213    | -1.33678 | 0.196402 | 0.305833 | -5.62355 |
| CACNA1G  | 0.197092 | -0.19236 | 1.336706 | 0.196427 | 0.305848 | -5.62365 |
| CCL3L3   | -0.60319 | 0.360735 | -1.33655 | 0.196476 | 0.305901 | -5.62384 |
| HARS     | -0.22429 | 0.216942 | -1.33646 | 0.196505 | 0.30592  | -5.62395 |
| ERO1LB   | -0.42832 | 0.450945 | -1.33593 | 0.196675 | 0.306088 | -5.62462 |
| ISM1     | 0.235092 | -0.50969 | 1.318735 | 0.203914 | 0.314615 | -5.62472 |
| NAPA     | -0.34432 | 0.518855 | -1.33572 | 0.196745 | 0.306172 | -5.62489 |
| PTGIS    | -0.4069  | -0.0146  | -1.3355  | 0.196815 | 0.306257 | -5.62516 |

|           |          |          |          |          |          |          |
|-----------|----------|----------|----------|----------|----------|----------|
| LOC254555 | -0.43917 | 0.144829 | -1.28806 | 0.21416  | 0.327091 | -5.62552 |
| ANKRD18B  | 0.484996 | 0.11142  | 1.326791 | 0.200415 | 0.310552 | -5.6262  |
| PNMA2     | 0.395368 | -0.11871 | 1.334388 | 0.197172 | 0.306764 | -5.62656 |
| LSG1      | -0.30901 | 0.273933 | -1.33428 | 0.197205 | 0.306791 | -5.62669 |
| C5orf42   | 0.292458 | -0.02768 | 1.33403  | 0.197287 | 0.306895 | -5.62701 |
| STT3A     | 0.266639 | 0.030356 | 1.333829 | 0.197352 | 0.306923 | -5.62726 |
| RRAGC     | 0.231652 | -0.19357 | 1.333827 | 0.197352 | 0.306923 | -5.62726 |
| PHF15     | -0.38681 | 0.522579 | -1.33347 | 0.197466 | 0.307075 | -5.6277  |
| LOC727869 | -0.36807 | 0.323051 | -1.33327 | 0.197532 | 0.307154 | -5.62796 |
| SMNDC1    | -0.34641 | 0.055623 | -1.32519 | 0.200934 | 0.311086 | -5.62819 |
| EPN1      | -0.42277 | 0.770496 | -1.33282 | 0.197676 | 0.307353 | -5.62852 |
| ENOPH1    | -0.43861 | 0.128102 | -1.33245 | 0.197797 | 0.307517 | -5.62899 |
| CCDC148   | 0.163414 | -0.04415 | 1.324396 | 0.201194 | 0.311438 | -5.62919 |
| NICN1     | 0.274615 | -0.42362 | 1.332134 | 0.197898 | 0.307604 | -5.62939 |
| RIC8B     | -0.41693 | 0.128372 | -1.33213 | 0.1979   | 0.307604 | -5.62939 |
| LOC100128 | 0.28053  | -0.09925 | 1.331909 | 0.197971 | 0.307665 | -5.62967 |
| XPA       | -0.23794 | -0.01446 | -1.33134 | 0.198154 | 0.307925 | -5.63038 |
| LOC283089 | 0.198935 | -0.22228 | 1.274935 | 0.219617 | 0.333348 | -5.63072 |
| NOL12     | -0.23656 | 0.174511 | -1.33097 | 0.198274 | 0.308047 | -5.63084 |
| STAT4     | 0.227769 | -0.16484 | 1.330953 | 0.19828  | 0.308047 | -5.63087 |
| ND5       | -0.47931 | 0.940583 | -1.33086 | 0.198309 | 0.308068 | -5.63098 |
| AACS      | 0.194985 | -0.08847 | 1.330761 | 0.198342 | 0.308075 | -5.63111 |
| CXorf23   | 0.502499 | -0.11541 | 1.330751 | 0.198345 | 0.308075 | -5.63112 |
| TELO2     | -0.27823 | 0.409971 | -1.33059 | 0.198396 | 0.308131 | -5.63132 |
| ADAMTSL5  | -0.31388 | 0.284645 | -1.32911 | 0.198876 | 0.308844 | -5.63317 |
| TMEM18    | -0.39873 | 0.22537  | -1.32902 | 0.198905 | 0.308844 | -5.63328 |
| ACADVL    | 0.203432 | -0.06966 | 1.328988 | 0.198916 | 0.308844 | -5.63333 |
| HMG20B    | -0.16028 | 0.317493 | -1.32876 | 0.19899  | 0.308881 | -5.63361 |
| FAM169B   | 0.290483 | -0.14945 | 1.328695 | 0.19901  | 0.308889 | -5.63369 |
| STH       | -0.28499 | 0.015983 | -1.32859 | 0.199044 | 0.308895 | -5.63382 |
| FZD9      | 0.208067 | -0.2677  | 1.328585 | 0.199046 | 0.308895 | -5.63383 |
| LOC100289 | -0.36653 | 0.275588 | -1.32848 | 0.199081 | 0.308925 | -5.63397 |
| SMAGP     | 0.22501  | 0.155505 | 1.328393 | 0.199108 | 0.308943 | -5.63407 |
| GMPPB     | -0.29872 | 0.558683 | -1.32817 | 0.19918  | 0.309029 | -5.63434 |
| ERC1      | -0.24782 | -0.0362  | -1.32802 | 0.19923  | 0.309064 | -5.63454 |
| C1orf9    | -0.38468 | -0.24977 | -1.32801 | 0.199234 | 0.309064 | -5.63455 |
| CLIC2     | 0.480302 | 0.05645  | 1.280458 | 0.21676  | 0.330093 | -5.6347  |
| SPRR4     | 0.271051 | -0.13115 | 1.28044  | 0.216766 | 0.330093 | -5.63472 |
| KLK6      | 0.183    | -0.14125 | 1.32708  | 0.199534 | 0.309506 | -5.63571 |
| LCP2      | -0.30425 | 0.293218 | -1.32654 | 0.19971  | 0.30973  | -5.63639 |
| VAT1L     | 0.173498 | -0.07715 | 1.32648  | 0.199729 | 0.309735 | -5.63646 |
| WFIKK1    | -0.33974 | 0.726995 | -1.32629 | 0.199792 | 0.309807 | -5.6367  |
| NKX3-2    | -0.28522 | -0.08723 | -1.31818 | 0.203225 | 0.313864 | -5.63691 |
| MAL2      | -0.30059 | -0.18608 | -1.3088  | 0.207187 | 0.318652 | -5.63697 |
| EDDM3A    | -0.23941 | 0.008875 | -1.32564 | 0.200002 | 0.310072 | -5.63751 |
| IL2RA     | -0.632   | 0.472715 | -1.32558 | 0.200021 | 0.310072 | -5.63758 |
| HCFC1     | -0.43314 | 0.644098 | -1.32557 | 0.200026 | 0.310072 | -5.6376  |

|           |          |          |          |          |          |          |
|-----------|----------|----------|----------|----------|----------|----------|
| MEI1      | -0.25695 | 0.077663 | -1.32507 | 0.200189 | 0.310276 | -5.63823 |
| PKIG      | -0.37652 | 0.509159 | -1.32494 | 0.20023  | 0.310314 | -5.63838 |
| HLA-DMA   | 0.423843 | -0.04151 | 1.324381 | 0.200413 | 0.310552 | -5.63908 |
| FZD2      | 0.486917 | 0.176131 | 1.324116 | 0.200499 | 0.310645 | -5.63941 |
| AHRR      | -0.54391 | 0.35503  | -1.32409 | 0.200507 | 0.310645 | -5.63944 |
| TTY13     | -0.35664 | 0.07289  | -1.32404 | 0.200525 | 0.310649 | -5.63951 |
| PSMA5     | -0.22483 | 0.028707 | -1.32398 | 0.200542 | 0.310651 | -5.63958 |
| CIB1      | 0.245202 | 0.001774 | 1.323808 | 0.2006   | 0.310703 | -5.6398  |
| GTF2H4    | -0.29727 | 0.324221 | -1.32376 | 0.200616 | 0.310703 | -5.63986 |
| PM20D2    | 0.455749 | -0.01871 | 1.32372  | 0.200628 | 0.310703 | -5.63991 |
| PM20D1    | -0.47038 | 0.224985 | -1.32369 | 0.200639 | 0.310703 | -5.63995 |
| FBXW11    | 0.178891 | -0.19569 | 1.32356  | 0.20068  | 0.310742 | -5.64011 |
| RFX3      | -0.21371 | 0.062522 | -1.32284 | 0.200916 | 0.311083 | -5.64101 |
| WDR44     | -0.31432 | -0.27337 | -1.32252 | 0.201019 | 0.311193 | -5.6414  |
| METTL21A  | -0.31738 | 0.293748 | -1.32121 | 0.201448 | 0.311783 | -5.64303 |
| TMEM191   | 0.251844 | -0.07795 | 1.320966 | 0.201528 | 0.311881 | -5.64334 |
| PARP10    | -0.41997 | 0.478569 | -1.32092 | 0.201543 | 0.311881 | -5.64339 |
| WDFY1     | -0.62492 | -0.11654 | -1.32086 | 0.201563 | 0.311887 | -5.64347 |
| CCL26     | -0.42975 | -0.0156  | -1.32059 | 0.20165  | 0.311997 | -5.6438  |
| TMPRSS12  | -0.41385 | 0.08277  | -1.32053 | 0.201671 | 0.312005 | -5.64388 |
| CD1C      | 0.574654 | -0.46369 | 1.320126 | 0.201803 | 0.312161 | -5.64438 |
| LARS      | 0.175486 | -0.13159 | 1.320124 | 0.201804 | 0.312161 | -5.64439 |
| FAN1      | 0.28168  | -0.13495 | 1.319523 | 0.202001 | 0.312367 | -5.64513 |
| PLOD1     | -0.39788 | 0.362408 | -1.31904 | 0.202159 | 0.312562 | -5.64573 |
| NDUFS8    | 0.267074 | -0.07624 | 1.318907 | 0.202203 | 0.312606 | -5.6459  |
| LOC10028  | -0.26519 | -0.04789 | -1.31885 | 0.202221 | 0.312609 | -5.64597 |
| BMI1      | -0.34413 | 0.0983   | -1.31848 | 0.202342 | 0.312772 | -5.64643 |
| SERPINB11 | 0.213478 | -0.16992 | 1.310357 | 0.205806 | 0.31705  | -5.64658 |
| HIST1H3A  | -0.43457 | 0.277267 | -1.31807 | 0.202477 | 0.312956 | -5.64694 |
| IL24      | 0.350365 | 0.105175 | 1.31799  | 0.202504 | 0.312973 | -5.64704 |
| RAB3B     | 0.38077  | 0.01552  | 1.317914 | 0.202529 | 0.312986 | -5.64713 |
| FDX1L     | 0.338753 | 0.280898 | 1.317739 | 0.202587 | 0.313046 | -5.64735 |
| HEXIM1    | 0.194831 | 0.000416 | 1.317699 | 0.2026   | 0.313046 | -5.6474  |
| AQP3      | 0.458722 | -0.0656  | 1.317222 | 0.202757 | 0.313264 | -5.64799 |
| FANCD2    | 0.138781 | -0.02776 | 1.31658  | 0.202968 | 0.313566 | -5.64879 |
| RNF144A   | 0.298787 | -0.09675 | 1.276258 | 0.217353 | 0.330705 | -5.64887 |
| KCND3     | 0.331793 | 0.022783 | 1.316503 | 0.202993 | 0.31358  | -5.64888 |
| HSPB1     | 0.534555 | 0.480008 | 1.316185 | 0.203098 | 0.313693 | -5.64928 |
| RPE       | -0.67951 | 0.907965 | -1.31568 | 0.203266 | 0.313902 | -5.64991 |
| UST       | 0.477245 | 0.021267 | 1.258815 | 0.225244 | 0.339886 | -5.64992 |
| KANK1     | 0.643583 | -0.40245 | 1.315499 | 0.203324 | 0.313967 | -5.65013 |
| LOC10050  | 0.262015 | 0.011661 | 1.315216 | 0.203417 | 0.314086 | -5.65048 |
| ZNF324    | 0.147841 | -0.05574 | 1.315155 | 0.203437 | 0.314086 | -5.65056 |
| SDHAF1    | 0.282046 | -0.21407 | 1.315121 | 0.203449 | 0.314086 | -5.6506  |
| MT1M      | 0.218142 | -0.07351 | 1.314765 | 0.203566 | 0.314187 | -5.65104 |
| RFFL      | -0.39374 | 0.496169 | -1.31476 | 0.203569 | 0.314187 | -5.65105 |
| C11orf75  | -0.37328 | 0.06304  | -1.31474 | 0.203573 | 0.314187 | -5.65107 |

|          |          |          |          |          |          |          |
|----------|----------|----------|----------|----------|----------|----------|
| COX7C    | 0.676481 | -1.44343 | 1.314728 | 0.203578 | 0.314187 | -5.65109 |
| RAB40B   | -0.42794 | 0.353998 | -1.26678 | 0.2215   | 0.335465 | -5.6511  |
| PSMA8    | 0.463499 | 0.117223 | 1.30627  | 0.207164 | 0.318652 | -5.65162 |
| FMO2     | 0.356539 | -0.45069 | 1.314196 | 0.203754 | 0.314433 | -5.65175 |
| IER5     | -0.28379 | 0.319659 | -1.31369 | 0.20392  | 0.314615 | -5.65237 |
| ZFP161   | -0.48757 | 0.26349  | -1.31362 | 0.203945 | 0.314629 | -5.65246 |
| PTRH2    | 0.297765 | -0.166   | 1.313213 | 0.204079 | 0.31481  | -5.65296 |
| DCTD     | 0.275451 | -0.04052 | 1.313142 | 0.204102 | 0.314822 | -5.65305 |
| SLC39A10 | -0.40066 | -0.03457 | -1.31283 | 0.204206 | 0.314957 | -5.65344 |
| CRYGC    | -0.36499 | -0.15041 | -1.30462 | 0.207715 | 0.319188 | -5.65365 |
| PES1     | -0.38655 | 0.367601 | -1.3118  | 0.204547 | 0.315458 | -5.65472 |
| GOLGA8F  | 0.499703 | -0.04821 | 1.311662 | 0.204592 | 0.315502 | -5.65489 |
| TCL1B    | -0.59777 | 0.819895 | -1.3115  | 0.204645 | 0.315559 | -5.65508 |
| PDCD5    | -0.40305 | 0.290722 | -1.31104 | 0.204799 | 0.315773 | -5.65566 |
| ARMC5    | 0.162842 | -0.03386 | 1.310925 | 0.204836 | 0.315804 | -5.6558  |
| SLAMF8   | -0.58267 | 0.029459 | -1.31084 | 0.204866 | 0.315825 | -5.65591 |
| GTF3A    | 0.338656 | -0.39259 | 1.309541 | 0.205296 | 0.316426 | -5.65751 |
| CCNF     | -0.4879  | 0.729709 | -1.30952 | 0.205304 | 0.316426 | -5.65754 |
| SRP54    | -0.47779 | 0.245776 | -1.30923 | 0.205399 | 0.316547 | -5.65789 |
| PGK2     | 0.374248 | -0.2975  | 1.291299 | 0.213059 | 0.325663 | -5.65837 |
| TACSTD2  | -1.04813 | 0.032717 | -1.30065 | 0.209043 | 0.320901 | -5.65852 |
| LCN2     | -1.31286 | 0.59144  | -1.30863 | 0.205598 | 0.316829 | -5.65863 |
| SUN2     | -0.34924 | 0.416354 | -1.30853 | 0.20563  | 0.316846 | -5.65875 |
| MIR17HG  | -0.35113 | 0.345841 | -1.3085  | 0.205641 | 0.316846 | -5.65879 |
| FANCM    | -0.43232 | -0.07715 | -1.30843 | 0.205666 | 0.31686  | -5.65889 |
| GUCY2F   | 0.745793 | -1.20071 | 0.889303 | 0.39733  | 0.523134 | -5.65929 |
| ZNF549   | 0.38321  | -0.14814 | 1.290486 | 0.213335 | 0.326059 | -5.65936 |
| PTRH1    | 0.268013 | -0.00643 | 1.307741 | 0.205894 | 0.317161 | -5.65973 |
| ZHX2     | 0.211721 | -0.04535 | 1.307385 | 0.206012 | 0.317318 | -5.66017 |
| USP24    | -0.22236 | -0.0484  | -1.30723 | 0.206065 | 0.317374 | -5.66037 |
| AKAP14   | -0.27988 | 0.05786  | -1.30693 | 0.206164 | 0.317502 | -5.66073 |
| MAK      | 0.458107 | 0.188499 | 1.306581 | 0.206281 | 0.317657 | -5.66116 |
| LOC28595 | -0.61664 | 1.126065 | -1.30647 | 0.206317 | 0.317687 | -5.6613  |
| HSPA9    | -0.32181 | 0.384329 | -1.30628 | 0.206382 | 0.317763 | -5.66154 |
| USP9Y    | -0.59772 | 0.265723 | -1.30589 | 0.206509 | 0.317901 | -5.66201 |
| PPP1R8   | -0.25149 | -0.02548 | -1.30586 | 0.206521 | 0.317901 | -5.66205 |
| ZNF280A  | 0.382955 | -0.48636 | 1.25749  | 0.224767 | 0.33935  | -5.66217 |
| SLC25A33 | -0.27648 | 0.071731 | -1.30566 | 0.206587 | 0.317978 | -5.66229 |
| LNX2     | 0.261539 | -0.5629  | 1.305368 | 0.206685 | 0.318091 | -5.66266 |
| TMUB1    | -0.16468 | 0.151863 | -1.30534 | 0.206693 | 0.318091 | -5.66269 |
| RAB38    | -0.438   | -0.17259 | -1.30495 | 0.206825 | 0.318246 | -5.66318 |
| MAGED2   | -0.25506 | 0.321525 | -1.30445 | 0.206993 | 0.318479 | -5.6638  |
| TEKT1    | -0.13442 | 0.026883 | -1.30427 | 0.207053 | 0.318546 | -5.66402 |
| GMEB1    | -0.16771 | 0.394881 | -1.30413 | 0.207098 | 0.31859  | -5.66418 |
| CC2D2A   | 0.355851 | -0.11239 | 1.295866 | 0.210653 | 0.322716 | -5.66438 |
| GRK5     | 0.287274 | 0.226317 | 1.303896 | 0.207177 | 0.318652 | -5.66447 |
| MSX1     | -0.38039 | -0.14531 | -1.2611  | 0.225502 | 0.340071 | -5.6646  |

|           |          |          |          |          |          |          |
|-----------|----------|----------|----------|----------|----------|----------|
| CEP112    | 0.357823 | -0.03752 | 1.303731 | 0.207232 | 0.318653 | -5.66468 |
| NKTR      | -0.27379 | 0.35539  | -1.30372 | 0.207236 | 0.318653 | -5.66469 |
| ACAD9     | -0.21074 | 0.258863 | -1.3037  | 0.207243 | 0.318653 | -5.66472 |
| TRIB3     | 0.372084 | 0.21735  | 1.303669 | 0.207253 | 0.318653 | -5.66475 |
| LOC145783 | -0.2276  | 0.389882 | -1.30358 | 0.207282 | 0.318673 | -5.66486 |
| ZNF423    | 0.351042 | -0.13211 | 1.285752 | 0.214946 | 0.327934 | -5.6651  |
| ZNF501    | -0.21921 | -0.16451 | -1.25497 | 0.225659 | 0.340251 | -5.66516 |
| SLC46A2   | 0.657608 | 0.006785 | 1.303259 | 0.20739  | 0.318814 | -5.66526 |
| DNASE2    | -0.31422 | 0.460878 | -1.3032  | 0.20741  | 0.318819 | -5.66533 |
| NPY5R     | -0.20529 | 0.062298 | -1.29507 | 0.210923 | 0.323013 | -5.66536 |
| C6orf218  | -0.33054 | -0.26247 | -1.29505 | 0.210929 | 0.323013 | -5.66538 |
| UBE2Q2    | -0.36061 | -0.01703 | -1.30308 | 0.20745  | 0.318856 | -5.66548 |
| LOC541473 | -0.43244 | -0.04955 | -1.30234 | 0.207697 | 0.319185 | -5.66638 |
| IGFBP1    | -0.24575 | 0.210347 | -1.29382 | 0.211346 | 0.323553 | -5.66688 |
| ATXN2     | 0.133609 | -0.02672 | 1.301897 | 0.207846 | 0.319365 | -5.66693 |
| GSTT1     | 0.458844 | 0.172014 | 1.253048 | 0.226341 | 0.340991 | -5.66743 |
| TAS2R46   | -0.58851 | 0.106064 | -1.2838  | 0.215615 | 0.328724 | -5.66747 |
| NUP210L   | 0.206195 | -0.20058 | 1.300332 | 0.208372 | 0.320122 | -5.66886 |
| PA2G4     | -0.24736 | 0.320764 | -1.29977 | 0.20856  | 0.320361 | -5.66954 |
| EIF4EBP2  | 0.516966 | -0.06885 | 1.299287 | 0.208723 | 0.320587 | -5.67014 |
| ZNF304    | -0.39402 | 0.188034 | -1.2989  | 0.208853 | 0.320761 | -5.67061 |
| FRAT2     | -0.32958 | 0.392317 | -1.29878 | 0.208893 | 0.320772 | -5.67076 |
| CORO1B    | -0.39991 | 0.811461 | -1.29865 | 0.208939 | 0.320818 | -5.67093 |
| NSD1      | -0.28008 | 0.42947  | -1.29849 | 0.208992 | 0.320874 | -5.67112 |
| AMIGO3    | 0.235933 | -0.01378 | 1.298343 | 0.209041 | 0.320901 | -5.6713  |
| ALS2      | 0.251548 | -0.12321 | 1.298159 | 0.209103 | 0.320969 | -5.67152 |
| PFKFB2    | 0.295397 | -0.48103 | 1.297433 | 0.209348 | 0.321319 | -5.67241 |
| NKX2-2    | 0.140121 | -0.03038 | 1.29738  | 0.209366 | 0.321321 | -5.67248 |
| SUPT4H1   | -0.26241 | 0.246389 | -1.29703 | 0.209484 | 0.321478 | -5.67291 |
| ENG       | 0.368619 | 0.179581 | 1.296699 | 0.209596 | 0.321624 | -5.67331 |
| PRSS54    | -0.52669 | 0.17448  | -1.2964  | 0.209697 | 0.321729 | -5.67368 |
| MRPL41    | 0.322138 | 0.033112 | 1.296327 | 0.209721 | 0.321741 | -5.67377 |
| PRDX4     | -0.37537 | 0.06823  | -1.296   | 0.209832 | 0.321884 | -5.67417 |
| GPAM      | -0.45317 | 0.18213  | -1.29595 | 0.209847 | 0.321884 | -5.67423 |
| C6orf154  | 0.343681 | 0.266131 | 1.295873 | 0.209874 | 0.321891 | -5.67433 |
| CHST13    | -0.44667 | 0.06426  | -1.29584 | 0.209885 | 0.321891 | -5.67436 |
| BTN3A1    | -0.8679  | 1.134051 | -1.29565 | 0.209949 | 0.321965 | -5.6746  |
| IDO2      | -0.38921 | 0.181178 | -1.27774 | 0.217694 | 0.331126 | -5.67478 |
| C17orf50  | -0.20461 | 0.07465  | -1.2953  | 0.210067 | 0.32212  | -5.67502 |
| EPHA4     | 0.469797 | 0.012467 | 1.294991 | 0.210173 | 0.322224 | -5.67541 |
| TEX10     | 0.393395 | -0.24413 | 1.294985 | 0.210175 | 0.322224 | -5.67541 |
| LOC100503 | -0.33915 | 0.317696 | -1.29496 | 0.210184 | 0.322224 | -5.67545 |
| CDKN2AIP1 | 0.376685 | -0.20933 | 1.294636 | 0.210293 | 0.322366 | -5.67584 |
| DHX57     | 0.295066 | -0.06093 | 1.294517 | 0.210333 | 0.322402 | -5.67599 |
| TMEM104   | 0.204032 | 0.078573 | 1.294354 | 0.210388 | 0.322461 | -5.67619 |
| RANGRF    | 0.316363 | -0.11195 | 1.29392  | 0.210535 | 0.322662 | -5.67672 |
| OR2A20P   | -0.25114 | 0.106965 | -1.29383 | 0.210565 | 0.322682 | -5.67683 |

|           |          |          |          |          |          |          |
|-----------|----------|----------|----------|----------|----------|----------|
| SLC25A30  | -0.31567 | -0.22841 | -1.25286 | 0.225565 | 0.340135 | -5.67684 |
| NR2E3     | -0.29858 | -0.29402 | -1.21162 | 0.245904 | 0.363339 | -5.67701 |
| DCUN1D5   | -0.4067  | -0.15685 | -1.29368 | 0.210617 | 0.322716 | -5.67701 |
| NFE2L3    | 0.338786 | -0.24005 | 1.293624 | 0.210636 | 0.322716 | -5.67708 |
| XRCC6BP1  | -0.36102 | 0.0331   | -1.2936  | 0.210644 | 0.322716 | -5.67711 |
| CNDP1     | 0.207014 | -0.47865 | 1.293375 | 0.21072  | 0.322793 | -5.67738 |
| PINX1     | -0.28235 | 0.41746  | -1.2932  | 0.210779 | 0.32285  | -5.6776  |
| MSN       | -0.35222 | 0.402667 | -1.29239 | 0.211056 | 0.323181 | -5.67859 |
| LOC440354 | 0.165522 | -0.01943 | 1.284007 | 0.214686 | 0.327639 | -5.67882 |
| TRIP13    | 0.676148 | -0.22917 | 1.161737 | 0.264951 | 0.384467 | -5.67899 |
| CXorf69   | -0.32083 | 0.1458   | -1.28358 | 0.214833 | 0.327812 | -5.67934 |
| PNPLA7    | -0.4148  | 0.036735 | -1.29157 | 0.211331 | 0.323553 | -5.67959 |
| C20orf11  | 0.227898 | -0.23284 | 1.291478 | 0.211364 | 0.323553 | -5.6797  |
| TMEM97    | -0.47032 | 0.590484 | -1.29148 | 0.211364 | 0.323553 | -5.6797  |
| RNH1      | 0.274115 | 0.188631 | 1.291386 | 0.211395 | 0.323574 | -5.67981 |
| ZNF449    | 0.195013 | -0.04334 | 1.273453 | 0.219178 | 0.332835 | -5.67994 |
| C11orf68  | -0.1502  | 0.249851 | -1.29112 | 0.211486 | 0.323687 | -5.68014 |
| NOB1      | -0.36558 | 0.564761 | -1.29098 | 0.211532 | 0.323733 | -5.68031 |
| NOMO1     | -0.29986 | 0.483566 | -1.29091 | 0.211557 | 0.323746 | -5.6804  |
| LAMA2     | 0.60632  | -0.22864 | 1.110759 | 0.285564 | 0.407048 | -5.68052 |
| RMND5A    | -0.41747 | 0.249958 | -1.2906  | 0.211662 | 0.323856 | -5.68077 |
| ESM1      | 0.229486 | -0.16536 | 1.290502 | 0.211695 | 0.323882 | -5.68089 |
| HLA-DRB3  | 0.770074 | -0.83659 | 1.290214 | 0.211793 | 0.324007 | -5.68124 |
| C11orf65  | -0.35288 | -0.05894 | -1.24127 | 0.230559 | 0.345089 | -5.68132 |
| IDUA      | 0.342474 | 0.217584 | 1.2896   | 0.212002 | 0.324301 | -5.68199 |
| ZNF542    | -0.1995  | -0.05447 | -1.2891  | 0.212172 | 0.324536 | -5.6826  |
| MIA       | -0.33638 | 0.614879 | -1.28905 | 0.212189 | 0.324536 | -5.68266 |
| ZNF692    | -0.31255 | 0.472454 | -1.28847 | 0.212387 | 0.324811 | -5.68337 |
| CEP350    | 0.258781 | -0.44816 | 1.288428 | 0.212402 | 0.324811 | -5.68342 |
| USP51     | -0.48704 | 0.628651 | -1.24692 | 0.227686 | 0.34205  | -5.68386 |
| IQCC      | 0.280107 | -0.22663 | 1.287757 | 0.212631 | 0.325103 | -5.68424 |
| FUCA1     | 0.202872 | -0.30232 | 1.287734 | 0.212639 | 0.325103 | -5.68427 |
| C17orf98  | -0.30105 | -0.08263 | -1.28772 | 0.212643 | 0.325103 | -5.68428 |
| FASTKD5   | -0.19032 | -0.00787 | -1.28714 | 0.212842 | 0.325382 | -5.68499 |
| TP63      | 0.378994 | -0.1756  | 1.122903 | 0.278185 | 0.398895 | -5.68681 |
| MEAF6     | 0.268067 | -0.26164 | 1.2853   | 0.213471 | 0.326196 | -5.68723 |
| LGALS16   | 0.34005  | 0.091351 | 1.285291 | 0.213474 | 0.326196 | -5.68724 |
| FAM168A   | -0.76239 | 0.471422 | -1.27667 | 0.217211 | 0.330565 | -5.6877  |
| FCGR2B    | -0.44399 | 0.520724 | -1.28491 | 0.213605 | 0.326346 | -5.68771 |
| C6orf195  | -0.16459 | -0.04073 | -1.27631 | 0.217337 | 0.330705 | -5.68814 |
| PNOC      | 0.451509 | -0.04303 | 1.284554 | 0.213726 | 0.326505 | -5.68814 |
| PTER      | -0.29316 | 0.059205 | -1.20173 | 0.248265 | 0.365753 | -5.68827 |
| C16orf80  | -0.24643 | 0.343463 | -1.28445 | 0.213763 | 0.326536 | -5.68827 |
| CCDC104   | 0.45712  | -0.35821 | 1.242647 | 0.229223 | 0.343743 | -5.6889  |
| LOC641298 | 0.442569 | -0.78898 | 1.112344 | 0.283656 | 0.404893 | -5.68925 |
| FAM185A   | -0.31134 | 0.162698 | -1.2834  | 0.214123 | 0.327059 | -5.68954 |
| EGR3      | 0.221342 | -0.08325 | 1.282883 | 0.2143   | 0.327279 | -5.69017 |

|           |          |          |          |          |          |          |
|-----------|----------|----------|----------|----------|----------|----------|
| INSL3     | -0.35253 | 0.361718 | -1.28256 | 0.214411 | 0.327382 | -5.69057 |
| TRIM60    | -0.10983 | 0.005487 | -1.28255 | 0.214413 | 0.327382 | -5.69057 |
| GALK1     | -0.29539 | 0.484559 | -1.28254 | 0.214417 | 0.327382 | -5.69059 |
| ZNF467    | -0.67751 | 0.850689 | -1.28248 | 0.214437 | 0.327387 | -5.69066 |
| LOC100501 | -0.12731 | 0.025461 | -1.28232 | 0.214493 | 0.327446 | -5.69085 |
| TBX3      | -0.28071 | -0.21054 | -1.25268 | 0.227415 | 0.341939 | -5.69099 |
| DKK4      | 0.367373 | -0.39933 | 1.240706 | 0.229923 | 0.344454 | -5.69119 |
| HCG18     | 0.33636  | -0.28046 | 1.281981 | 0.21461  | 0.327585 | -5.69127 |
| PPFIA1    | -0.27867 | 0.142511 | -1.28196 | 0.214617 | 0.327585 | -5.69129 |
| FKSG29    | 0.47448  | -0.69768 | 1.073156 | 0.304542 | 0.428002 | -5.69145 |
| OR5AK2    | 0.361149 | -0.23212 | 1.281801 | 0.214672 | 0.327639 | -5.69149 |
| SMAD5     | 0.409089 | 0.058861 | 1.273248 | 0.218397 | 0.331958 | -5.69182 |
| APBB1     | 0.44025  | 0.060712 | 1.281423 | 0.214802 | 0.32779  | -5.69194 |
| BTC       | 0.246421 | -0.07441 | 1.281053 | 0.214929 | 0.327933 | -5.69239 |
| SLC4A4    | -0.31367 | 0.1237   | -1.27257 | 0.218631 | 0.332185 | -5.69264 |
| PIK3C2A   | -0.54682 | 0.517659 | -1.28023 | 0.215213 | 0.328315 | -5.69339 |
| COL7A1    | -0.25882 | 0.409363 | -1.27997 | 0.215301 | 0.328415 | -5.6937  |
| ITFG3     | -0.22688 | 0.244373 | -1.27994 | 0.215312 | 0.328415 | -5.69374 |
| C13orf16  | -0.33684 | 0.258349 | -1.2798  | 0.215362 | 0.328415 | -5.69392 |
| DIMT1     | -0.30219 | 0.146947 | -1.27978 | 0.215367 | 0.328415 | -5.69393 |
| RFX2      | -0.5351  | 0.459277 | -1.27976 | 0.215376 | 0.328415 | -5.69397 |
| TCF15     | -0.17752 | -0.00519 | -1.27975 | 0.215379 | 0.328415 | -5.69398 |
| KCNJ5     | -0.35157 | -0.05475 | -1.27923 | 0.215557 | 0.328661 | -5.6946  |
| UXS1      | 0.217455 | -0.15916 | 1.278717 | 0.215734 | 0.32888  | -5.69523 |
| ST6GALNA  | -0.24052 | 0.504117 | -1.27853 | 0.2158   | 0.32894  | -5.69546 |
| IP6K3     | -0.30967 | 0.047164 | -1.27851 | 0.215807 | 0.32894  | -5.69548 |
| ZBTB44    | 0.287045 | -0.2366  | 1.2782   | 0.215913 | 0.329075 | -5.69585 |
| DSG3      | 0.446804 | -0.8971  | 0.414268 | 0.700632 | 0.789334 | -5.69597 |
| F10       | 0.224551 | -0.08581 | 1.269407 | 0.219733 | 0.333498 | -5.69644 |
| TPRG1     | -0.71567 | -0.22833 | -1.26932 | 0.219764 | 0.333519 | -5.69655 |
| DPF1      | 0.3629   | -0.45055 | 1.16899  | 0.259673 | 0.37863  | -5.69657 |
| RGL3      | 0.471331 | 0.220931 | 1.277274 | 0.216233 | 0.329512 | -5.69697 |
| SYT17     | 0.408597 | 0.002455 | 1.277273 | 0.216233 | 0.329512 | -5.69697 |
| GGT6      | 0.219353 | -0.16955 | 1.277211 | 0.216254 | 0.329519 | -5.69705 |
| NIPBL     | -0.39293 | 0.088152 | -1.27713 | 0.216283 | 0.329537 | -5.69715 |
| C6orf26   | -0.23554 | 0.420343 | -1.27708 | 0.2163   | 0.329537 | -5.69721 |
| TAMM41    | 0.320941 | -0.01223 | 1.276682 | 0.216438 | 0.329722 | -5.69769 |
| ALPK2     | -0.32249 | -0.14787 | -1.27621 | 0.216603 | 0.329947 | -5.69826 |
| VIL1      | 0.57916  | 0.313202 | 1.276012 | 0.21667  | 0.330024 | -5.6985  |
| TBCD      | 0.32174  | 0.175622 | 1.275763 | 0.216756 | 0.330093 | -5.6988  |
| TMEM48    | -0.37394 | -0.01372 | -1.27558 | 0.21682  | 0.330147 | -5.69902 |
| SS18L2    | 0.324709 | -0.61959 | 1.275535 | 0.216835 | 0.330147 | -5.69908 |
| CNO       | -0.77515 | 0.066557 | -1.04607 | 0.318245 | 0.442781 | -5.69916 |
| LHFPL3    | 0.281654 | -0.11727 | 1.27535  | 0.216899 | 0.330178 | -5.6993  |
| TFAP2E    | 0.305654 | -0.08401 | 1.275332 | 0.216905 | 0.330178 | -5.69932 |
| TEX2      | -0.13491 | 0.171392 | -1.27533 | 0.216906 | 0.330178 | -5.69932 |
| C11orf73  | -0.21642 | -0.20046 | -1.27495 | 0.217039 | 0.330356 | -5.69979 |

|           |          |          |          |          |          |          |
|-----------|----------|----------|----------|----------|----------|----------|
| IARS2     | -0.19933 | -0.11703 | -1.2748  | 0.21709  | 0.330407 | -5.69996 |
| KIAA1191  | 0.255325 | -0.06421 | 1.274297 | 0.217264 | 0.330621 | -5.70057 |
| LGSN      | 0.711487 | 0.139706 | 1.265253 | 0.221186 | 0.335183 | -5.70143 |
| ZNF582    | -0.12459 | 0.024917 | -1.27325 | 0.217627 | 0.331089 | -5.70183 |
| S100A13   | 0.220239 | -0.11934 | 1.273216 | 0.21764  | 0.331089 | -5.70188 |
| ZNF777    | 0.391834 | 0.08903  | 1.273026 | 0.217706 | 0.331126 | -5.70211 |
| ARHGEF15  | 0.217728 | -0.20337 | 1.272992 | 0.217718 | 0.331126 | -5.70215 |
| IQCH      | 0.225498 | -0.08523 | 1.272954 | 0.217731 | 0.331126 | -5.70219 |
| DNLZ      | 0.269036 | -0.01198 | 1.272214 | 0.217988 | 0.331491 | -5.70309 |
| TNMD      | -0.50215 | 0.359471 | -1.27197 | 0.218074 | 0.331595 | -5.70338 |
| ACSF3     | -0.25107 | 0.371594 | -1.27177 | 0.218143 | 0.331675 | -5.70362 |
| RNASEH2B  | -0.39332 | 0.415745 | -1.2716  | 0.218202 | 0.331739 | -5.70383 |
| LOC10013: | -0.2013  | 0.0389   | -1.27146 | 0.218249 | 0.331785 | -5.70399 |
| B3GNT3    | 0.454742 | -0.25901 | 1.221549 | 0.237753 | 0.353455 | -5.70431 |
| C7        | -0.23933 | 0.044056 | -1.27115 | 0.218358 | 0.331924 | -5.70436 |
| BARHL2    | 0.2961   | -0.3066  | 1.24128  | 0.23149  | 0.346088 | -5.70442 |
| THRA      | 0.349908 | 0.155665 | 1.270987 | 0.218416 | 0.331961 | -5.70456 |
| FPR1      | -0.42533 | 0.238592 | -1.27083 | 0.218471 | 0.332014 | -5.70475 |
| LLPH      | 0.322636 | -0.16106 | 1.270789 | 0.218485 | 0.332014 | -5.7048  |
| USP27X    | -0.26564 | 0.124453 | -1.27069 | 0.218518 | 0.33204  | -5.70492 |
| MBD3      | -0.38061 | 0.454731 | -1.27022 | 0.218681 | 0.332227 | -5.70548 |
| BMP6      | 0.492489 | -0.08546 | 1.270192 | 0.218693 | 0.332227 | -5.70552 |
| MYLPF     | 0.220882 | -0.22319 | 1.261751 | 0.222417 | 0.336658 | -5.70562 |
| NEK4      | -0.36314 | 0.364609 | -1.27009 | 0.218728 | 0.332254 | -5.70564 |
| NKG7      | 0.439623 | -0.22082 | 1.270039 | 0.218746 | 0.332257 | -5.70571 |
| CASP10    | -0.32512 | 0.293701 | -1.26968 | 0.21887  | 0.332419 | -5.70613 |
| SELS      | -0.24052 | -0.10288 | -1.26916 | 0.219053 | 0.332671 | -5.70676 |
| ZNF785    | 0.448956 | -0.62804 | 0.955345 | 0.362227 | 0.488235 | -5.70681 |
| PRO1483   | 0.135321 | -0.02849 | 1.260584 | 0.222828 | 0.337124 | -5.70701 |
| LOC10050: | -0.48871 | 0.317256 | -1.26871 | 0.21921  | 0.332858 | -5.7073  |
| NOS1      | 0.193813 | -0.15953 | 1.268415 | 0.219314 | 0.332989 | -5.70766 |
| HIST4H4   | 0.36528  | -0.45719 | 1.167034 | 0.262877 | 0.382192 | -5.70839 |
| EFNB2     | -0.28788 | 0.216945 | -1.26773 | 0.219551 | 0.333325 | -5.70848 |
| SLC7A7    | 0.369731 | -0.13557 | 1.267631 | 0.219588 | 0.333328 | -5.7086  |
| C8orf40   | -0.40391 | 0.263016 | -1.20817 | 0.243651 | 0.360691 | -5.70894 |
| GABARAPL  | -0.28448 | 0.304424 | -1.26699 | 0.219814 | 0.333568 | -5.70938 |
| ZNF566    | -0.46342 | 0.189561 | -1.26686 | 0.219858 | 0.333609 | -5.70953 |
| C6orf52   | 0.256393 | 0.024099 | 1.24841  | 0.227995 | 0.342324 | -5.7098  |
| PPP3CA    | 0.304442 | -0.3859  | 1.266366 | 0.220031 | 0.333846 | -5.71012 |
| SGK196    | 0.229785 | -0.29671 | 1.266203 | 0.220088 | 0.333906 | -5.71032 |
| EPHA1     | 0.485518 | -0.23397 | 1.266107 | 0.220122 | 0.333932 | -5.71044 |
| DNASE1L3  | 0.494052 | -0.40506 | 1.265996 | 0.220161 | 0.333965 | -5.71057 |
| ATXN10    | -0.41101 | 0.331999 | -1.25729 | 0.223993 | 0.338415 | -5.71095 |
| THAP11    | -0.31753 | 0.304406 | -1.26563 | 0.220288 | 0.334133 | -5.71101 |
| HBEGF     | 0.231202 | -0.36053 | 1.265492 | 0.220337 | 0.334181 | -5.71117 |
| LOC34876: | -0.34876 | -0.01994 | -1.2654  | 0.22037  | 0.334205 | -5.71129 |
| STXBP5L   | 0.54884  | 0.043758 | 1.265331 | 0.220394 | 0.334216 | -5.71137 |



|           |          |          |          |          |          |          |
|-----------|----------|----------|----------|----------|----------|----------|
| KBTBD10   | -0.39922 | 0.187891 | -1.25686 | 0.224143 | 0.338585 | -5.71145 |
| ACACA     | -0.37599 | 0.405754 | -1.26478 | 0.220587 | 0.334482 | -5.71203 |
| CDC14B    | 0.259172 | -0.07745 | 1.264262 | 0.220769 | 0.334705 | -5.71265 |
| LOC100506 | -0.36624 | 0.29085  | -1.26424 | 0.220776 | 0.334705 | -5.71267 |
| CKLF      | -0.12199 | 0.024398 | -1.26422 | 0.220785 | 0.334705 | -5.7127  |
| NDUFB1    | -0.44351 | -0.26573 | -1.26341 | 0.221068 | 0.335046 | -5.71367 |
| NPM2      | -0.34475 | -0.46911 | -1.26341 | 0.221069 | 0.335046 | -5.71367 |
| RPL36AP4C | -0.4816  | 0.531834 | -1.26338 | 0.221078 | 0.335046 | -5.71371 |
| SERPINA3  | -0.42704 | 0.228804 | -1.25491 | 0.224837 | 0.339389 | -5.71378 |
| EIF5A     | -0.3093  | 0.08061  | -1.263   | 0.221215 | 0.335201 | -5.71417 |
| CASZ1     | 0.256033 | -0.15252 | 1.262743 | 0.221304 | 0.335299 | -5.71447 |
| GABRA6    | 0.087335 | -0.01747 | 1.26265  | 0.221336 | 0.335299 | -5.71458 |
| PTPRK     | -0.39807 | 0.103629 | -1.26264 | 0.22134  | 0.335299 | -5.7146  |
| FAM13A    | 0.341717 | -0.1794  | 1.262617 | 0.221348 | 0.335299 | -5.71462 |
| ACTR2     | -0.25123 | 0.260631 | -1.23236 | 0.23472  | 0.34969  | -5.71486 |
| ZNF141    | -0.36157 | -0.00447 | -1.26228 | 0.221467 | 0.335453 | -5.71503 |
| XBP1      | -0.32303 | 0.209215 | -1.26216 | 0.221509 | 0.335465 | -5.71517 |
| MLF1IP    | -0.59805 | 0.226914 | -1.25362 | 0.225294 | 0.339936 | -5.71531 |
| ZNF830    | 0.941763 | 0.534798 | 1.160889 | 0.261856 | 0.381019 | -5.71536 |
| AIDA      | -0.34674 | -0.1973  | -1.26197 | 0.221576 | 0.335541 | -5.7154  |
| RPS13     | 0.428597 | -0.19883 | 1.261704 | 0.22167  | 0.335656 | -5.71572 |
| TFAP4     | -0.34205 | 0.538664 | -1.26141 | 0.221772 | 0.335786 | -5.71607 |
| LOC100506 | -0.33179 | -0.13635 | -1.21924 | 0.23778  | 0.353468 | -5.71625 |
| CASP12    | -0.31026 | 0.025832 | -1.26094 | 0.221937 | 0.33601  | -5.71663 |
| SLC1A4    | 0.26732  | 0.268826 | 1.260859 | 0.221968 | 0.33603  | -5.71673 |
| BAIAP3    | 0.514147 | 0.358572 | 1.260723 | 0.222016 | 0.336077 | -5.71689 |
| AES       | -0.3982  | 0.629762 | -1.2593  | 0.222518 | 0.336785 | -5.71859 |
| GALT      | -0.26229 | 0.267372 | -1.2592  | 0.222553 | 0.336812 | -5.71871 |
| FAM81B    | 0.362456 | 0.096258 | 1.216941 | 0.238632 | 0.354547 | -5.71891 |
| RBBP4     | -0.45622 | 0.350561 | -1.25879 | 0.222699 | 0.336999 | -5.7192  |
| PCBD1     | 0.184774 | -0.06185 | 1.258727 | 0.222721 | 0.336999 | -5.71928 |
| ZSCAN18   | -0.32476 | 0.467046 | -1.25871 | 0.222729 | 0.336999 | -5.7193  |
| CST8      | -0.37784 | 0.110476 | -1.24953 | 0.226753 | 0.341402 | -5.72017 |
| RAPGEF1   | -0.33785 | 0.0824   | -1.25762 | 0.223113 | 0.337529 | -5.7206  |
| TMEM216   | -0.17589 | 0.043395 | -1.25749 | 0.223157 | 0.33757  | -5.72075 |
| TPP2      | 0.239685 | -0.31165 | 1.257366 | 0.223203 | 0.337613 | -5.72091 |
| SPHKAP    | 0.393813 | 0.026473 | 1.257101 | 0.223297 | 0.337708 | -5.72122 |
| MRPS17    | -0.39036 | 0.902109 | -1.25709 | 0.2233   | 0.337708 | -5.72123 |
| KLHL3     | 0.549836 | -0.25645 | 1.257038 | 0.223319 | 0.337711 | -5.7213  |
| C13orf41  | -0.37952 | 0.011311 | -1.25682 | 0.223397 | 0.337803 | -5.72156 |
| DSG4      | -0.25026 | -0.11356 | -1.25667 | 0.223449 | 0.337853 | -5.72173 |
| KLRK1     | -0.15079 | -0.02592 | -1.25663 | 0.223465 | 0.337853 | -5.72179 |
| FAM135B   | -0.34917 | -0.06046 | -1.20638 | 0.243406 | 0.360409 | -5.7218  |
| ZNF19     | -0.58624 | -0.15324 | -1.25649 | 0.223514 | 0.337875 | -5.72195 |
| EIF2C4    | -0.53931 | 0.62723  | -1.25645 | 0.223527 | 0.337875 | -5.72199 |
| CCT3      | 0.330896 | 0.007658 | 1.256441 | 0.223531 | 0.337875 | -5.72201 |
| RPL39L    | -0.39219 | 0.050979 | -1.25631 | 0.223577 | 0.337918 | -5.72216 |

|           |          |          |          |          |          |          |
|-----------|----------|----------|----------|----------|----------|----------|
| XAGE-4    | 0.285612 | -0.21369 | 1.23783  | 0.231801 | 0.34636  | -5.72226 |
| SIK1      | 0.472592 | 0.098814 | 1.256    | 0.223688 | 0.338059 | -5.72254 |
| LOC728716 | -0.33407 | 0.049302 | -1.25568 | 0.223802 | 0.338205 | -5.72292 |
| ZNF567    | -0.48409 | -0.07056 | -1.21318 | 0.240033 | 0.356303 | -5.72325 |
| RAB5A     | -0.57909 | 0.539876 | -1.25533 | 0.223924 | 0.338365 | -5.72333 |
| ZFP62     | -0.37038 | 0.093234 | -1.2552  | 0.22397  | 0.338408 | -5.72348 |
| PIK3C2G   | -0.2408  | 0.068247 | -1.23652 | 0.232275 | 0.346851 | -5.7238  |
| LOC654433 | -0.82402 | 0.714674 | -1.21269 | 0.240215 | 0.356509 | -5.72382 |
| SYAP1     | 0.332713 | 0.118964 | 1.254828 | 0.224104 | 0.338557 | -5.72393 |
| RBBP5     | -0.33527 | 0.497327 | -1.25468 | 0.224157 | 0.338585 | -5.72411 |
| TLL2      | 0.398819 | -0.06579 | 1.254318 | 0.224285 | 0.338754 | -5.72454 |
| DHX30     | 0.212126 | -0.06321 | 1.254101 | 0.224363 | 0.338844 | -5.7248  |
| SOHLH2    | -0.42603 | 0.23425  | -1.21133 | 0.240725 | 0.357142 | -5.72539 |
| CACNA1S   | 0.163982 | -0.14761 | 1.253492 | 0.224579 | 0.339127 | -5.72553 |
| GEMIN4    | 0.436148 | 0.031861 | 1.253478 | 0.224584 | 0.339127 | -5.72554 |
| HKDC1     | 0.609167 | -0.45178 | 1.253291 | 0.224651 | 0.339201 | -5.72576 |
| OR3A2     | -0.23899 | 0.139299 | -1.24462 | 0.228514 | 0.342841 | -5.72599 |
| MGC12982  | -0.25544 | 0.567586 | -1.25279 | 0.22483  | 0.339389 | -5.72636 |
| SERPINB9  | 0.767604 | -0.25737 | 1.252713 | 0.224857 | 0.339389 | -5.72645 |
| LMOD3     | -0.12656 | 0.028182 | -1.2527  | 0.224862 | 0.339389 | -5.72647 |
| SKA1      | -0.67483 | 0.599591 | -1.25249 | 0.224936 | 0.339474 | -5.72672 |
| LOC645753 | 0.296472 | -0.44528 | 1.252246 | 0.225023 | 0.33958  | -5.72701 |
| FBXL15    | -0.19506 | 0.124587 | -1.25144 | 0.225312 | 0.339938 | -5.72797 |
| HEXB      | -0.29764 | 0.028189 | -1.25122 | 0.225391 | 0.34     | -5.72823 |
| GALNT3    | -0.11844 | 0.023687 | -1.25121 | 0.225392 | 0.34     | -5.72824 |
| KIR2DS2   | 0.498388 | 0.103579 | 1.251175 | 0.225406 | 0.34     | -5.72828 |
| ADAM28    | 0.412748 | 0.09466  | 1.250927 | 0.225494 | 0.340071 | -5.72858 |
| MFSD2A    | 0.202405 | 0.010817 | 1.250898 | 0.225505 | 0.340071 | -5.72861 |
| C14orf169 | 0.318927 | -0.06662 | 1.250417 | 0.225677 | 0.340251 | -5.72918 |
| SEC24D    | -0.4415  | 0.150413 | -1.25015 | 0.225771 | 0.340368 | -5.7295  |
| FLJ27352  | 0.405079 | -0.34094 | 1.207618 | 0.242117 | 0.358989 | -5.72966 |
| C17orf58  | -0.10966 | 0.011255 | -1.24992 | 0.225854 | 0.340467 | -5.72977 |
| PLD4      | 0.59167  | 0.325246 | 1.249764 | 0.22591  | 0.340525 | -5.72996 |
| C6orf106  | 0.187421 | -0.10616 | 1.24938  | 0.226047 | 0.340679 | -5.73042 |
| EMR2      | -0.51722 | 0.252674 | -1.24933 | 0.226066 | 0.340681 | -5.73048 |
| OCIAD2    | 0.477444 | -0.34637 | 1.249014 | 0.226178 | 0.340824 | -5.73085 |
| ASB11     | 0.212576 | -0.26072 | 0.571404 | 0.583681 | 0.69334  | -5.73087 |
| RND1      | 0.224207 | -0.01603 | 1.240391 | 0.230037 | 0.344598 | -5.73097 |
| TIGD5     | 0.236048 | 0.072359 | 1.248906 | 0.226217 | 0.340856 | -5.73098 |
| KCTD17    | -0.31737 | 0.516217 | -1.24878 | 0.226261 | 0.340896 | -5.73112 |
| TULP2     | 0.319763 | -0.17979 | 1.239983 | 0.230184 | 0.34474  | -5.73145 |
| NDRG2     | 0.537844 | 0.156132 | 1.248164 | 0.226483 | 0.341178 | -5.73186 |
| SMAD3     | 0.290727 | 0.14646  | 1.248044 | 0.226526 | 0.341217 | -5.732   |
| KRT19P2   | -0.47366 | -0.26613 | -1.24784 | 0.226599 | 0.341296 | -5.73224 |
| GPR20     | 0.67864  | -0.28367 | 1.247801 | 0.226613 | 0.341296 | -5.73229 |
| TIMM17B   | -0.17642 | 0.100847 | -1.24758 | 0.226691 | 0.341364 | -5.73255 |
| DAG1      | 0.301553 | -0.21371 | 1.247576 | 0.226694 | 0.341364 | -5.73256 |

|           |          |          |          |          |          |          |
|-----------|----------|----------|----------|----------|----------|----------|
| POPDC3    | -0.31364 | -0.0526  | -1.24744 | 0.226743 | 0.341402 | -5.73272 |
| ZNF562    | -0.24367 | -0.03134 | -1.23887 | 0.230587 | 0.345106 | -5.73276 |
| RPL23AP5  | 0.247293 | -0.03785 | 1.247275 | 0.226802 | 0.341448 | -5.73291 |
| PGA3      | 0.853022 | -0.41191 | 1.247123 | 0.226856 | 0.341456 | -5.73309 |
| WBSCR27   | 0.871252 | -0.17206 | 1.247114 | 0.226859 | 0.341456 | -5.73311 |
| COMMD3    | -0.38948 | -0.18028 | -1.24707 | 0.226876 | 0.341456 | -5.73316 |
| VSNL1     | -0.37182 | 0.256767 | -1.24704 | 0.226888 | 0.341456 | -5.7332  |
| ENAH      | -0.42208 | 0.279376 | -1.24702 | 0.226894 | 0.341456 | -5.73322 |
| TMEM64    | -0.21952 | 0.021748 | -1.24666 | 0.227024 | 0.341625 | -5.73365 |
| MYL3      | -0.25432 | -0.00097 | -1.24655 | 0.22706  | 0.341654 | -5.73377 |
| LAMP2     | -0.43218 | 0.197413 | -1.2464  | 0.227116 | 0.341712 | -5.73395 |
| KAT6A     | -0.34765 | 0.598113 | -1.24623 | 0.227176 | 0.341753 | -5.73415 |
| KIAA1804  | -0.14198 | 0.028395 | -1.2462  | 0.227187 | 0.341753 | -5.73419 |
| TCEAL4    | 0.261088 | 0.234479 | 1.246137 | 0.22721  | 0.341753 | -5.73426 |
| AQP4      | 0.117101 | -0.02342 | 1.246129 | 0.227213 | 0.341753 | -5.73427 |
| LOC100128 | -0.32976 | -0.186   | -1.23745 | 0.231101 | 0.34569  | -5.73443 |
| TPTE2P3   | 0.307649 | -0.35213 | 1.195242 | 0.247619 | 0.365102 | -5.73451 |
| TMEM161   | -0.42489 | -0.125   | -1.24571 | 0.227365 | 0.341933 | -5.73477 |
| DARS      | 0.243991 | -0.31994 | 1.24567  | 0.227378 | 0.341933 | -5.73482 |
| C17orf49  | -0.1933  | 0.019791 | -1.24565 | 0.227385 | 0.341933 | -5.73484 |
| KCNK2     | 0.324538 | -0.29765 | 1.203092 | 0.243823 | 0.360917 | -5.73485 |
| WAS       | -0.25665 | 0.354527 | -1.24551 | 0.227437 | 0.341939 | -5.73501 |
| MAN2A1    | 0.27267  | 0.029003 | 1.245493 | 0.227442 | 0.341939 | -5.73503 |
| NDUFA12   | 0.256439 | -0.12208 | 1.245144 | 0.227567 | 0.34205  | -5.73544 |
| SCD       | -0.42191 | 0.315757 | -1.24503 | 0.227609 | 0.34205  | -5.73558 |
| GYG2      | -0.25832 | 0.072284 | -1.24498 | 0.227625 | 0.34205  | -5.73563 |
| EGR1      | 0.377188 | -0.2274  | 1.244922 | 0.227647 | 0.34205  | -5.7357  |
| SLC2A9    | 0.378214 | 0.029954 | 1.244887 | 0.22766  | 0.34205  | -5.73574 |
| PER2      | -0.30662 | 0.102385 | -1.24488 | 0.227661 | 0.34205  | -5.73575 |
| SNAP25    | -0.39147 | 0.156143 | -1.24481 | 0.227686 | 0.34205  | -5.73583 |
| EIF3E     | -0.49944 | 0.102033 | -1.2448  | 0.22769  | 0.34205  | -5.73585 |
| B9D1      | -0.32804 | 0.776438 | -1.24477 | 0.227701 | 0.34205  | -5.73588 |
| CRYBB2    | -0.50728 | 0.228122 | -1.24475 | 0.227709 | 0.34205  | -5.73591 |
| HDAC10    | -0.27123 | 0.453615 | -1.24471 | 0.227725 | 0.34205  | -5.73596 |
| FXN       | 0.286855 | -0.04519 | 1.24449  | 0.227803 | 0.342124 | -5.73622 |
| SLC5A5    | 0.264442 | -0.36664 | 1.244471 | 0.227809 | 0.342124 | -5.73624 |
| HSD11B1L  | -0.29717 | 0.378102 | -1.24433 | 0.227862 | 0.342177 | -5.73641 |
| SLC35B2   | 0.238697 | 0.016868 | 1.244177 | 0.227916 | 0.342231 | -5.73659 |
| FBXL2     | -0.171   | -0.16714 | -1.23549 | 0.231814 | 0.34636  | -5.73674 |
| MPI       | 0.4039   | -0.08523 | 1.243882 | 0.228021 | 0.342338 | -5.73693 |
| HOXD11    | -0.24329 | -0.03591 | -1.20123 | 0.244526 | 0.361767 | -5.73698 |
| SLC24A3   | 0.645562 | 0.052249 | 1.24354  | 0.228145 | 0.342497 | -5.73734 |
| SLC9A2    | 0.203698 | -0.22231 | 1.23486  | 0.232043 | 0.346616 | -5.73747 |
| FBXO10    | 0.399802 | 0.003448 | 1.243397 | 0.228196 | 0.342548 | -5.73751 |
| LIMS2     | -0.38269 | 0.461636 | -1.24313 | 0.228292 | 0.342631 | -5.73782 |
| PIK3IP1   | 0.488206 | -0.13061 | 1.243108 | 0.228301 | 0.342631 | -5.73785 |
| GDPD4     | -0.17777 | -0.09028 | -1.24307 | 0.228315 | 0.342631 | -5.7379  |

|           |          |          |          |          |          |          |
|-----------|----------|----------|----------|----------|----------|----------|
| CPE       | -0.16592 | 0.046056 | -1.24305 | 0.228322 | 0.342631 | -5.73792 |
| LOC10013: | -0.27384 | 0.027771 | -1.24292 | 0.22837  | 0.342677 | -5.73808 |
| ZNF417    | 0.188135 | -0.15479 | 1.242776 | 0.228421 | 0.342727 | -5.73824 |
| FGF14     | 0.313396 | -0.0877  | 1.200006 | 0.24499  | 0.362263 | -5.73838 |
| DOC2A     | 0.159045 | -0.02502 | 1.191712 | 0.248966 | 0.366431 | -5.73852 |
| TRIM9     | 0.479686 | 0.22377  | 1.241947 | 0.22872  | 0.343123 | -5.73922 |
| FAM114A2  | -0.34065 | -0.0732  | -1.23336 | 0.232588 | 0.347225 | -5.73923 |
| LOC64598: | -0.16887 | 0.010769 | -1.23323 | 0.232637 | 0.347272 | -5.73939 |
| ULK2      | 0.418435 | -0.49471 | 1.241681 | 0.228816 | 0.343241 | -5.73954 |
| DCPS      | -0.21052 | 0.469331 | -1.2414  | 0.228919 | 0.343369 | -5.73987 |
| LOC10050: | 0.347861 | -0.40121 | 1.240523 | 0.229234 | 0.343743 | -5.7409  |
| ADNP2     | -0.32314 | 0.05305  | -1.24051 | 0.229237 | 0.343743 | -5.74091 |
| LOC64146: | -0.20021 | -0.03076 | -1.24051 | 0.229238 | 0.343743 | -5.74092 |
| CTTNBP2N  | 0.132778 | -0.05648 | 1.231898 | 0.233122 | 0.347917 | -5.74095 |
| TPH1      | -0.42441 | 0.152666 | -1.24034 | 0.229301 | 0.343811 | -5.74112 |
| CCDC120   | 0.269865 | -0.23437 | 1.240275 | 0.229324 | 0.34382  | -5.7412  |
| TMEM27    | 0.310439 | -0.16738 | 1.231439 | 0.23329  | 0.348087 | -5.74149 |
| ZFP41     | -0.26808 | 0.336818 | -1.23998 | 0.22943  | 0.343952 | -5.74154 |
| CRB1      | -0.45851 | 0.346573 | -1.23963 | 0.229556 | 0.344115 | -5.74195 |
| C17orf28  | 0.303701 | -0.08536 | 1.239552 | 0.229586 | 0.344133 | -5.74205 |
| PTK7      | -0.16169 | 0.190354 | -1.23942 | 0.229634 | 0.344165 | -5.74221 |
| TRIM63    | -0.40949 | -0.068   | -1.2394  | 0.229642 | 0.344165 | -5.74223 |
| PTCD3     | -0.32898 | 0.12137  | -1.1963  | 0.246397 | 0.363876 | -5.74261 |
| FOXO1     | 0.333927 | -0.04063 | 1.238985 | 0.229791 | 0.344341 | -5.74272 |
| YIF1B     | -0.36422 | 0.214848 | -1.23897 | 0.229795 | 0.344341 | -5.74273 |
| ZSCAN22   | -0.23622 | 0.000837 | -1.23885 | 0.229841 | 0.344383 | -5.74288 |
| NEU2      | 0.22243  | -0.07185 | 1.230188 | 0.233747 | 0.34853  | -5.74295 |
| LOC28569: | -0.39113 | 0.525119 | -1.23877 | 0.229869 | 0.344399 | -5.74297 |
| HLX       | -0.598   | 0.878712 | -1.23822 | 0.230068 | 0.344619 | -5.74362 |
| PLD3      | 0.244004 | 0.28235  | 1.238014 | 0.230144 | 0.344705 | -5.74386 |
| LGI1      | -0.42024 | -0.18476 | -1.22921 | 0.234106 | 0.349012 | -5.7441  |
| HMGNA4    | -0.33489 | 0.050936 | -1.23778 | 0.230229 | 0.34478  | -5.74414 |
| INO80E    | -0.17864 | 0.154933 | -1.23767 | 0.230269 | 0.344796 | -5.74427 |
| GJB7      | 0.327154 | -0.77179 | 1.237652 | 0.230275 | 0.344796 | -5.74429 |
| ALDH7A1   | -0.18952 | -0.07827 | -1.23713 | 0.230464 | 0.345045 | -5.74491 |
| ACSM3     | -0.22926 | -0.01347 | -1.23707 | 0.230485 | 0.345045 | -5.74497 |
| IL3       | 0.25653  | -0.25092 | 1.228314 | 0.234434 | 0.349448 | -5.74514 |
| NT5C3     | -0.36095 | -0.14734 | -1.23687 | 0.230557 | 0.345089 | -5.74521 |
| ATP4A     | 0.280735 | -0.32941 | 1.175734 | 0.256032 | 0.374297 | -5.74567 |
| LOC72853: | 0.329123 | -0.12558 | 1.23623  | 0.230791 | 0.345385 | -5.74596 |
| VEGFB     | -0.32726 | 0.663817 | -1.23577 | 0.230957 | 0.34558  | -5.7465  |
| LOC10050: | -0.59125 | 0.488851 | -1.22704 | 0.234902 | 0.349826 | -5.74663 |
| TRIM43    | -0.5085  | 0.163416 | -1.23565 | 0.231003 | 0.345597 | -5.74665 |
| RPL37A    | 0.412606 | -0.19548 | 1.235647 | 0.231004 | 0.345597 | -5.74665 |
| SLC25A25  | 0.367328 | -0.09259 | 1.235545 | 0.231041 | 0.345626 | -5.74677 |
| DDX58     | -0.51623 | 0.535212 | -1.23524 | 0.231152 | 0.34574  | -5.74713 |
| RASA4     | 0.327856 | 0.203639 | 1.235164 | 0.231179 | 0.345754 | -5.74722 |

|           |          |          |          |          |          |          |
|-----------|----------|----------|----------|----------|----------|----------|
| LMO7      | -0.47548 | 0.216759 | -1.23502 | 0.231231 | 0.345806 | -5.74739 |
| SPON1     | 0.604176 | -0.43933 | 1.191588 | 0.248199 | 0.365751 | -5.74798 |
| WDR62     | -0.19307 | 0.320453 | -1.23437 | 0.231467 | 0.346085 | -5.74815 |
| SNX18     | -0.25561 | -0.08412 | -1.23436 | 0.231471 | 0.346085 | -5.74816 |
| SULT1A4   | -0.35287 | 0.142954 | -1.23388 | 0.231646 | 0.346294 | -5.74873 |
| KDM3B     | -0.2768  | 0.188022 | -1.2338  | 0.231675 | 0.346311 | -5.74882 |
| MCPH1     | 0.4018   | 0.004816 | 1.233675 | 0.231722 | 0.346354 | -5.74897 |
| SIX4      | 0.210821 | 0.0452   | 1.2336   | 0.231749 | 0.34636  | -5.74906 |
| COL16A1   | -0.3437  | -0.02199 | -1.23357 | 0.231761 | 0.34636  | -5.7491  |
| BCS1L     | -0.19327 | 0.278567 | -1.23349 | 0.231789 | 0.34636  | -5.74919 |
| MAGEB10   | -0.37242 | 0.02843  | -1.23333 | 0.231847 | 0.346382 | -5.74937 |
| PPIL1     | -0.30914 | 0.185009 | -1.23323 | 0.231884 | 0.346411 | -5.74949 |
| CCL4      | 0.536798 | -0.28586 | 1.232758 | 0.232056 | 0.346616 | -5.75005 |
| C4orf45   | 0.368486 | -0.55017 | 1.232592 | 0.232117 | 0.346681 | -5.75024 |
| P4HB      | -0.35182 | 0.515086 | -1.23226 | 0.232238 | 0.346835 | -5.75063 |
| LOC100129 | 0.358416 | -0.23361 | 1.189151 | 0.249133 | 0.366618 | -5.75075 |
| UTP6      | -0.32485 | 0.330288 | -1.23213 | 0.232284 | 0.346851 | -5.75078 |
| SERPINA9  | -0.14547 | -0.02054 | -1.23204 | 0.23232  | 0.346878 | -5.75089 |
| SIPA1L1   | -0.24533 | 0.40913  | -1.23164 | 0.232464 | 0.347066 | -5.75135 |
| ZNF829    | 0.415027 | -0.55656 | 1.222727 | 0.236489 | 0.35187  | -5.75166 |
| CGRRF1    | -0.50077 | 0.107637 | -1.23079 | 0.232775 | 0.347451 | -5.75235 |
| LOC100506 | -0.24205 | -0.16393 | -1.22189 | 0.236799 | 0.352276 | -5.75263 |
| GALR1     | -0.44274 | 0.101042 | -1.23048 | 0.232889 | 0.347595 | -5.75272 |
| NOP56     | -0.26276 | 0.353771 | -1.22976 | 0.233155 | 0.347938 | -5.75357 |
| IGSF22    | 0.386625 | -0.264   | 1.229413 | 0.23328  | 0.348087 | -5.75397 |
| ZSCAN5A   | -0.22543 | 0.221131 | -1.22921 | 0.233354 | 0.348156 | -5.7542  |
| C1orf145  | 0.531116 | -0.37741 | 1.229157 | 0.233374 | 0.34816  | -5.75427 |
| MRPL16    | -0.20589 | 0.051367 | -1.22905 | 0.233413 | 0.348191 | -5.75439 |
| STEAP1    | 0.192078 | -0.06121 | 1.185841 | 0.250407 | 0.367912 | -5.7545  |
| CTPS      | -0.33142 | 0.515788 | -1.22886 | 0.233483 | 0.34827  | -5.75462 |
| ABHD12B   | 0.303612 | 0.005058 | 1.220064 | 0.237474 | 0.35312  | -5.75475 |
| LEPROTL1  | 0.369271 | -0.72262 | 1.228638 | 0.233565 | 0.348365 | -5.75488 |
| PIGZ      | 0.216296 | -0.08641 | 1.228499 | 0.233616 | 0.348389 | -5.75504 |
| LOC100285 | 0.539308 | -0.14558 | 1.228497 | 0.233616 | 0.348389 | -5.75504 |
| DNAJB6    | -0.27499 | -0.0573  | -1.22835 | 0.233671 | 0.348443 | -5.75522 |
| PRDM16    | 0.221349 | -0.05751 | 1.227325 | 0.234047 | 0.348951 | -5.75641 |
| EIF2AK3   | 0.342211 | 0.098467 | 1.208139 | 0.242744 | 0.359674 | -5.75676 |
| CAPN11    | 0.512483 | 0.335892 | 1.183661 | 0.251248 | 0.368844 | -5.75696 |
| KLF11     | 0.165505 | 0.058358 | 1.226608 | 0.23431  | 0.349291 | -5.75725 |
| GTPBP10   | -0.42776 | 0.010462 | -1.2261  | 0.234497 | 0.349516 | -5.75784 |
| FAM49A    | -0.37567 | 0.312132 | -1.22605 | 0.234516 | 0.349518 | -5.75791 |
| PTPRCAP   | 0.397906 | 0.076024 | 1.225827 | 0.234598 | 0.349614 | -5.75817 |
| FNDC7     | 0.437643 | 0.319041 | 1.225521 | 0.234711 | 0.34969  | -5.75852 |
| FAM175A   | -0.39487 | 0.001416 | -1.2255  | 0.234719 | 0.34969  | -5.75855 |
| PCBP3     | -0.37125 | 0.238373 | -1.22544 | 0.234742 | 0.34969  | -5.75862 |
| PFN2      | -0.41352 | 0.060548 | -1.22538 | 0.234761 | 0.34969  | -5.75868 |
| AKNAD1    | 0.308809 | -0.06953 | 1.225353 | 0.234773 | 0.34969  | -5.75872 |

|           |          |          |          |          |          |          |
|-----------|----------|----------|----------|----------|----------|----------|
| C7orf50   | 0.371119 | 0.008955 | 1.225348 | 0.234775 | 0.34969  | -5.75873 |
| SAGE1     | 0.269291 | -0.20996 | 1.128904 | 0.27387  | 0.394227 | -5.75876 |
| BZW2      | 0.370961 | -0.31706 | 1.225085 | 0.234871 | 0.349808 | -5.75903 |
| NUDCD2    | -0.37515 | 0.123727 | -1.21598 | 0.23899  | 0.354997 | -5.75949 |
| RNF44     | -0.26687 | 0.248647 | -1.22463 | 0.235039 | 0.350005 | -5.75957 |
| TTC38     | -0.2742  | 0.365731 | -1.2243  | 0.23516  | 0.350158 | -5.75995 |
| PLCXD3    | 0.303317 | 0.099755 | 1.215514 | 0.239163 | 0.355201 | -5.76003 |
| DDX60     | -0.91202 | 0.49647  | -1.22363 | 0.235407 | 0.350475 | -5.76073 |
| PSORS1C1  | -0.1582  | -0.09714 | -1.22363 | 0.235409 | 0.350475 | -5.76073 |
| DUSP8     | -0.22588 | 0.376263 | -1.22339 | 0.235495 | 0.350577 | -5.76101 |
| MRPL54    | 0.306363 | -0.38111 | 1.223221 | 0.235559 | 0.350645 | -5.76121 |
| LOC100136 | 0.193492 | -0.0923  | 1.222991 | 0.235644 | 0.350745 | -5.76148 |
| CAD       | -0.28837 | 0.521219 | -1.22203 | 0.235998 | 0.351245 | -5.76259 |
| COL4A3    | 0.145743 | -0.05608 | 1.21289  | 0.240142 | 0.356438 | -5.76307 |
| TSLP      | -0.42568 | 0.085487 | -1.21267 | 0.240226 | 0.356509 | -5.76333 |
| TIMM8B    | -0.59686 | -0.32872 | -1.22121 | 0.236304 | 0.351674 | -5.76356 |
| C6orf146  | -0.34555 | 0.054182 | -1.22091 | 0.236413 | 0.351809 | -5.7639  |
| LOC100285 | 0.258546 | -0.21083 | 1.220789 | 0.236459 | 0.351851 | -5.76404 |
| BCL2L12   | 0.253796 | -0.1228  | 1.220622 | 0.236521 | 0.351889 | -5.76424 |
| LSM4      | 0.259074 | -0.13579 | 1.21973  | 0.236851 | 0.352328 | -5.76528 |
| PTPLB     | 0.249228 | -0.46073 | 1.219003 | 0.237121 | 0.352702 | -5.76612 |
| PLCD1     | 0.206615 | -0.18805 | 1.218669 | 0.237245 | 0.35286  | -5.76651 |
| OGDHL     | -0.22872 | 0.175686 | -1.20985 | 0.24128  | 0.357938 | -5.76658 |
| CAMK1G    | 0.311203 | -0.09718 | 1.218468 | 0.23732  | 0.352944 | -5.76674 |
| GPR171    | 0.512707 | -0.5986  | 1.218249 | 0.237401 | 0.353039 | -5.767   |
| KLRG2     | 0.407453 | -0.21463 | 1.217807 | 0.237565 | 0.353229 | -5.76751 |
| INO80D    | 0.149376 | -0.18581 | 1.217351 | 0.237735 | 0.353455 | -5.76804 |
| DYNC2H1   | 0.240073 | -0.36231 | 1.077597 | 0.299606 | 0.422427 | -5.76859 |
| SEC16A    | -0.29842 | 0.178627 | -1.21671 | 0.237975 | 0.353731 | -5.76879 |
| UPF3B     | 0.330886 | -0.15598 | 1.172366 | 0.255643 | 0.373951 | -5.76967 |
| RASSF9    | 0.203679 | 0.014756 | 1.215916 | 0.238269 | 0.354136 | -5.76971 |
| CDCA7L    | -0.42109 | 0.215035 | -1.21588 | 0.238284 | 0.354136 | -5.76975 |
| MYO9A     | 0.261067 | -0.41485 | 1.215803 | 0.238311 | 0.35415  | -5.76984 |
| ACTN3     | 0.220033 | -0.32448 | 1.215722 | 0.238342 | 0.354168 | -5.76993 |
| CIZ1      | 0.268376 | 0.239071 | 1.215129 | 0.238563 | 0.35447  | -5.77062 |
| HNMT      | 0.40469  | -0.45612 | 1.195994 | 0.247332 | 0.364872 | -5.77067 |
| IFIT1     | 1.394552 | -0.61292 | 1.214792 | 0.238688 | 0.354603 | -5.77101 |
| SPAG1     | 0.209976 | -0.03146 | 1.213933 | 0.239009 | 0.354999 | -5.77201 |
| ISL1      | 0.137933 | -0.03065 | 1.194204 | 0.248014 | 0.36552  | -5.77271 |
| HK2       | -0.72641 | 0.698623 | -1.21311 | 0.239316 | 0.355401 | -5.77296 |
| FBXL3     | -0.40302 | -0.28609 | -1.21301 | 0.239354 | 0.35543  | -5.77308 |
| TAS2R41   | 0.354445 | -0.36528 | 1.124834 | 0.278495 | 0.39927  | -5.7732  |
| C2orf43   | -0.35652 | 0.333801 | -1.21166 | 0.23986  | 0.356155 | -5.77464 |
| LRRC8E    | -0.36419 | -0.34141 | -1.21152 | 0.239912 | 0.356205 | -5.7748  |
| DYRK2     | 0.426934 | -0.11544 | 1.211398 | 0.239957 | 0.356241 | -5.77494 |
| CAMP      | 0.835453 | 0.188628 | 1.211356 | 0.239973 | 0.356241 | -5.77499 |
| LRFN5     | -0.28127 | 0.07208  | -1.2021  | 0.244197 | 0.361389 | -5.77549 |

|           |          |          |          |          |          |          |
|-----------|----------|----------|----------|----------|----------|----------|
| FZD10     | -0.29309 | -0.0128  | -1.1917  | 0.248969 | 0.366431 | -5.77555 |
| TRMT61B   | -0.60364 | 0.371907 | -1.16696 | 0.257765 | 0.376353 | -5.77571 |
| COCH      | -0.47535 | 0.209    | -1.21013 | 0.240434 | 0.35679  | -5.77641 |
| ARF6      | -0.36638 | 0.191181 | -1.20993 | 0.240506 | 0.356871 | -5.77664 |
| SPTBN1    | -0.4797  | 0.700339 | -1.20965 | 0.240614 | 0.357003 | -5.77697 |
| DEFB123   | -0.22739 | -0.01144 | -1.1897  | 0.249737 | 0.367204 | -5.77783 |
| STK31     | -0.10778 | 0.021557 | -1.20737 | 0.241468 | 0.358189 | -5.77959 |
| TLX3      | 0.279204 | -0.11793 | 1.198297 | 0.245639 | 0.363003 | -5.77985 |
| SLC8A1    | -0.51319 | 0.30959  | -1.20712 | 0.241563 | 0.358296 | -5.77988 |
| PRSS47    | 0.221415 | -0.30392 | 1.207085 | 0.241577 | 0.358296 | -5.77992 |
| MTMR4     | -0.2304  | -0.23261 | -1.20649 | 0.241799 | 0.358599 | -5.78061 |
| RLN3      | 0.195939 | -0.26404 | 1.206414 | 0.241829 | 0.358617 | -5.7807  |
| CYP2U1    | 0.279783 | -0.18394 | 1.206223 | 0.241901 | 0.358697 | -5.78092 |
| HCFC1R1   | -0.22981 | 0.100626 | -1.20536 | 0.242225 | 0.359122 | -5.78191 |
| ANKHD1-E  | 0.139924 | 0.024397 | 1.20531  | 0.242246 | 0.359126 | -5.78197 |
| CFHR4     | -0.24698 | -0.15616 | -1.20512 | 0.242319 | 0.359207 | -5.78219 |
| ZNF716    | -0.2528  | -0.21996 | -1.20471 | 0.242472 | 0.3594   | -5.78266 |
| ACCS      | 0.467972 | -0.1444  | 1.204673 | 0.242486 | 0.3594   | -5.7827  |
| RTDR1     | 0.512393 | -0.10636 | 1.204622 | 0.242506 | 0.359402 | -5.78276 |
| CD38      | -0.41982 | 0.914177 | -1.20448 | 0.242557 | 0.359451 | -5.78292 |
| C19orf69  | -0.3918  | 0.336054 | -1.19529 | 0.246785 | 0.36435  | -5.78329 |
| ELMOD1    | -0.42845 | 0.22202  | -1.20414 | 0.242688 | 0.359618 | -5.78332 |
| MRPL3     | -0.4592  | 0.074426 | -1.19493 | 0.246921 | 0.364458 | -5.7837  |
| DLX3      | 0.180864 | -0.18787 | 1.20356  | 0.242907 | 0.359888 | -5.78398 |
| LOC100128 | -0.17346 | 0.052198 | -1.2031  | 0.243081 | 0.360119 | -5.78451 |
| PPP5C     | -0.3629  | 0.621059 | -1.20284 | 0.243178 | 0.360215 | -5.78481 |
| KCNC1     | -0.46964 | 0.323839 | -1.2028  | 0.243193 | 0.360215 | -5.78486 |
| TGIF2     | 0.318214 | 0.001998 | 1.202782 | 0.243201 | 0.360215 | -5.78488 |
| GLDN      | -0.57419 | 0.126173 | -1.19376 | 0.247369 | 0.364898 | -5.78504 |
| SPCS1     | -0.14243 | -0.1229  | -1.2026  | 0.243269 | 0.360289 | -5.78509 |
| MPP5      | -0.17587 | -0.1514  | -1.2024  | 0.243347 | 0.360377 | -5.78532 |
| TMEM66    | -0.40543 | 0.042404 | -1.20225 | 0.243402 | 0.360409 | -5.78549 |
| UBE2D2    | -0.15117 | 0.027708 | -1.20212 | 0.24345  | 0.360447 | -5.78563 |
| L3MBTL2   | -0.25175 | 0.538984 | -1.2016  | 0.243647 | 0.360691 | -5.78623 |
| DDX26B    | -0.44749 | 0.243661 | -1.1924  | 0.247888 | 0.365389 | -5.78658 |
| SPR       | 0.364336 | 0.20499  | 1.20095  | 0.243895 | 0.360997 | -5.78698 |
| DNAJB12   | -0.18965 | 0.215008 | -1.20044 | 0.244088 | 0.361255 | -5.78757 |
| HSD17B3   | 0.100099 | -0.02879 | 1.191487 | 0.248237 | 0.365753 | -5.78762 |
| LOC64732  | 0.537728 | 0.215699 | 1.19145  | 0.248251 | 0.365753 | -5.78767 |
| PSMC3IP   | -0.59066 | 0.676749 | -1.19995 | 0.244273 | 0.361475 | -5.78813 |
| TNRC18    | -0.61875 | 0.355242 | -1.19939 | 0.244488 | 0.361766 | -5.78878 |
| TYSND1    | 0.228847 | 0.126878 | 1.199297 | 0.244523 | 0.361767 | -5.78888 |
| ZBTB2     | -0.24148 | 0.135471 | -1.19911 | 0.244595 | 0.361842 | -5.7891  |
| ARL14     | 0.486459 | -0.21032 | 1.154913 | 0.262546 | 0.381888 | -5.7891  |
| CCDC134   | 0.16347  | -0.01237 | 1.198333 | 0.244889 | 0.362187 | -5.78999 |
| CXorf58   | 0.15181  | -0.03196 | 1.189404 | 0.249036 | 0.366502 | -5.79    |
| MBIP      | -0.38556 | 0.037319 | -1.19825 | 0.244919 | 0.362187 | -5.79008 |

|           |          |          |          |          |          |          |
|-----------|----------|----------|----------|----------|----------|----------|
| CCDC51    | -0.17998 | 0.148605 | -1.19825 | 0.244919 | 0.362187 | -5.79008 |
| FAM198A   | -0.35296 | 0.093493 | -1.19825 | 0.24492  | 0.362187 | -5.79008 |
| EPS8L1    | 0.216478 | 0.099617 | 1.198249 | 0.244921 | 0.362187 | -5.79008 |
| LOC100501 | -0.5029  | 0.386263 | -1.19789 | 0.245059 | 0.362336 | -5.7905  |
| STARD6    | -0.20289 | 0.057572 | -1.1888  | 0.249268 | 0.366788 | -5.79068 |
| AURKC     | -0.25498 | 0.083923 | -1.19751 | 0.245203 | 0.362523 | -5.79093 |
| PITRM1    | -0.26228 | 0.160974 | -1.19729 | 0.245286 | 0.362618 | -5.79118 |
| KDM3A     | -0.30238 | 0.040907 | -1.19697 | 0.245407 | 0.362742 | -5.79154 |
| WDR26     | -0.28259 | -0.02952 | -1.19697 | 0.245407 | 0.362742 | -5.79154 |
| BTF3      | 0.206772 | 0.030624 | 1.196918 | 0.245428 | 0.362745 | -5.79161 |
| APH1A     | -0.39602 | 0.309513 | -1.19685 | 0.245452 | 0.362754 | -5.79168 |
| RDX       | -0.37506 | -0.03461 | -1.18768 | 0.2497   | 0.367204 | -5.79196 |
| TAS2R20   | -0.11993 | 0.060177 | -1.18762 | 0.249723 | 0.367204 | -5.79203 |
| TTYH1     | 0.163207 | -0.0563  | 1.19626  | 0.245679 | 0.363034 | -5.79236 |
| ZNF577    | 0.314903 | -0.17959 | 1.195237 | 0.246069 | 0.363509 | -5.79353 |
| RELA      | 0.19534  | 0.045209 | 1.195229 | 0.246072 | 0.363509 | -5.79354 |
| ST6GALNA  | -0.37521 | 0.086551 | -1.19522 | 0.246075 | 0.363509 | -5.79355 |
| MAP7      | -0.3616  | 0.092401 | -1.19508 | 0.246129 | 0.363562 | -5.79371 |
| CYFIP1    | 0.340897 | 0.069037 | 1.132077 | 0.273442 | 0.393784 | -5.79377 |
| C10orf111 | 0.322184 | -0.25861 | 1.175479 | 0.255232 | 0.373489 | -5.79389 |
| PURB      | -0.26172 | 0.213506 | -1.19482 | 0.246227 | 0.36368  | -5.794   |
| SLC30A3   | -0.21689 | -0.08266 | -1.19455 | 0.246332 | 0.363807 | -5.79432 |
| CHST3     | 0.452878 | -0.10073 | 1.185105 | 0.250691 | 0.368136 | -5.79488 |
| TFPI      | 0.48237  | 0.300265 | 1.193865 | 0.246593 | 0.364138 | -5.7951  |
| CAMK1D    | 0.399384 | 0.117267 | 1.193671 | 0.246667 | 0.36422  | -5.79532 |
| ZNF642    | -0.44222 | 0.285459 | -1.19334 | 0.246793 | 0.36435  | -5.79569 |
| PTPRO     | -0.27732 | 0.082172 | -1.19312 | 0.246878 | 0.364449 | -5.79595 |
| KRTCAP3   | -0.36757 | 0.443778 | -1.19304 | 0.246911 | 0.364458 | -5.79605 |
| PASD1     | 0.482414 | -0.22298 | 1.183833 | 0.251182 | 0.368802 | -5.79632 |
| CSPP1     | -0.32371 | 0.36323  | -1.1928  | 0.247002 | 0.36453  | -5.79632 |
| ZP4       | -0.30911 | 0.00988  | -1.19278 | 0.247008 | 0.36453  | -5.79634 |
| TMEM223   | 0.393369 | -0.1228  | 1.192631 | 0.247065 | 0.364588 | -5.79651 |
| FAM173A   | 0.220529 | -0.0065  | 1.192428 | 0.247143 | 0.364675 | -5.79674 |
| POLD2     | -0.29168 | 0.577122 | -1.19232 | 0.247186 | 0.364712 | -5.79687 |
| CCDC141   | 0.314524 | -0.55934 | 1.192149 | 0.24725  | 0.364778 | -5.79706 |
| CMTM6     | -0.314   | -0.13177 | -1.19175 | 0.247405 | 0.364924 | -5.79752 |
| FAM136A   | -0.23677 | 0.092955 | -1.1915  | 0.247497 | 0.365027 | -5.79779 |
| PFKL      | -0.29976 | 0.407144 | -1.19147 | 0.247512 | 0.365027 | -5.79784 |
| LOC100506 | 0.156137 | -0.0814  | 1.191334 | 0.247562 | 0.365074 | -5.79799 |
| SYCN      | 0.235971 | -0.19897 | 1.191114 | 0.247647 | 0.365116 | -5.79824 |
| RGS20     | -0.18242 | -0.26905 | -1.18209 | 0.251858 | 0.369655 | -5.79829 |
| LOC253039 | 0.341731 | -0.68116 | 1.190973 | 0.247701 | 0.365167 | -5.7984  |
| VARS      | 0.277488 | 0.126889 | 1.190926 | 0.247719 | 0.365167 | -5.79845 |
| EID2B     | -0.43401 | 0.232925 | -1.1904  | 0.247922 | 0.365411 | -5.79905 |
| PCDHB2    | -0.08748 | 0.017497 | -1.18965 | 0.248208 | 0.365751 | -5.7999  |
| RNASE7    | 0.184604 | -0.15126 | 1.189419 | 0.248298 | 0.365773 | -5.80017 |
| FAM115A   | 0.121127 | -0.02692 | 1.169707 | 0.257488 | 0.376004 | -5.80036 |



|           |          |          |          |          |          |          |
|-----------|----------|----------|----------|----------|----------|----------|
| SLC25A1   | 0.244719 | 0.063214 | 1.189092 | 0.248423 | 0.36593  | -5.80054 |
| HSPB6     | 0.191944 | -0.14369 | 1.188967 | 0.248472 | 0.365967 | -5.80068 |
| ANKRD17   | -0.26535 | 0.308915 | -1.18893 | 0.248485 | 0.365967 | -5.80072 |
| LCOR      | 0.324114 | -0.23771 | 1.098958 | 0.289267 | 0.411373 | -5.80072 |
| DKFZP434I | 0.184228 | -0.07776 | 1.179844 | 0.252727 | 0.370598 | -5.80083 |
| GRAMD4    | -0.31123 | 0.21192  | -1.18859 | 0.248616 | 0.366132 | -5.80111 |
| ZDHHC22   | 0.191488 | -0.1758  | 1.188422 | 0.248681 | 0.366175 | -5.8013  |
| METRNL    | 0.216869 | 0.006043 | 1.188379 | 0.248698 | 0.366175 | -5.80135 |
| DDAH1     | 0.271703 | -0.10284 | 1.188326 | 0.248718 | 0.366175 | -5.80141 |
| ST7L      | -0.24353 | 0.06432  | -1.18832 | 0.24872  | 0.366175 | -5.80142 |
| LOC72832  | -0.26744 | 0.147981 | -1.18784 | 0.248907 | 0.366423 | -5.80197 |
| LRRC8A    | 0.254524 | 0.519688 | 1.187775 | 0.24893  | 0.366429 | -5.80204 |
| PCDH19    | 0.324936 | -0.05774 | 1.177712 | 0.253556 | 0.371591 | -5.80323 |
| LOC100506 | -0.4197  | 0.298524 | -1.18651 | 0.249419 | 0.366983 | -5.80348 |
| HSPA6     | -0.36789 | 0.673603 | -1.18645 | 0.24944  | 0.366987 | -5.80354 |
| ATP6AP1L  | 0.360249 | 0.008872 | 1.186348 | 0.24948  | 0.367003 | -5.80366 |
| C1orf51   | -0.1667  | 0.036252 | -1.18633 | 0.249489 | 0.367003 | -5.80369 |
| PTH2R     | 0.340206 | 0.060832 | 1.186033 | 0.249602 | 0.367142 | -5.80402 |
| PRSS42    | 0.369533 | -0.23653 | 1.185985 | 0.24962  | 0.367142 | -5.80407 |
| PALB2     | -0.28322 | 0.084179 | -1.18579 | 0.249696 | 0.367204 | -5.8043  |
| TMEM237   | -0.3463  | 0.027016 | -1.18528 | 0.249893 | 0.367389 | -5.80488 |
| RPL29     | 0.352446 | -0.14801 | 1.185258 | 0.249901 | 0.367389 | -5.8049  |
| P4HA3     | -0.23047 | 0.119009 | -1.18516 | 0.24994  | 0.367419 | -5.80501 |
| CEP76     | -0.26712 | 0.0698   | -1.18506 | 0.249979 | 0.367448 | -5.80513 |
| FIGNL1    | -0.3786  | 0.183516 | -1.18469 | 0.250121 | 0.367603 | -5.80555 |
| SPRYD5    | -0.20381 | 0.022102 | -1.18469 | 0.250122 | 0.367603 | -5.80555 |
| EMX2      | 0.294024 | -0.24565 | 1.10871  | 0.28408  | 0.405439 | -5.80592 |
| RPS21     | 0.398172 | -0.38859 | 1.184247 | 0.250292 | 0.367826 | -5.80605 |
| EFHC1     | -0.31711 | 0.463926 | -1.18406 | 0.250364 | 0.367904 | -5.80626 |
| DFFA      | -0.32369 | 0.63718  | -1.18397 | 0.250401 | 0.367912 | -5.80637 |
| ORC2      | -0.19451 | 0.172112 | -1.18378 | 0.250472 | 0.367945 | -5.80657 |
| POLR2C    | -0.21026 | 0.206969 | -1.18377 | 0.250478 | 0.367945 | -5.80659 |
| MBD3L1    | -0.21146 | -0.14855 | -1.18375 | 0.250486 | 0.367945 | -5.80661 |
| ZNF284    | 0.397933 | -0.12603 | 1.183685 | 0.250509 | 0.367952 | -5.80668 |
| NLRP1     | 0.27191  | -0.01259 | 1.183607 | 0.25054  | 0.367969 | -5.80677 |
| NAA40     | -0.27449 | 0.54054  | -1.18349 | 0.250585 | 0.368008 | -5.80691 |
| NADKD1    | 0.393472 | 0.076603 | 1.163699 | 0.259853 | 0.378808 | -5.80707 |
| EIF1      | 0.350618 | -0.25697 | 1.182547 | 0.25095  | 0.368489 | -5.80797 |
| HLA-DPA1  | 0.880453 | -0.5088  | 1.181828 | 0.251229 | 0.368843 | -5.80879 |
| LOC100507 | -0.39275 | 0.071441 | -1.17176 | 0.255881 | 0.374132 | -5.80993 |
| LRR1      | -0.28649 | 0.158287 | -1.18075 | 0.251647 | 0.369401 | -5.81001 |
| COMTD1    | 0.188735 | 0.006334 | 1.180464 | 0.251758 | 0.369537 | -5.81033 |
| FTL       | 0.320612 | -0.12366 | 1.180096 | 0.251901 | 0.369692 | -5.81075 |
| CAMKV     | -0.28669 | 0.061764 | -1.17101 | 0.256176 | 0.374471 | -5.81077 |
| C18orf15  | -0.3132  | -0.01122 | -1.17997 | 0.251951 | 0.369736 | -5.81089 |
| ZNF10     | -0.36605 | 0.322051 | -1.17987 | 0.25199  | 0.369754 | -5.81101 |
| C7orf46   | -0.2232  | 0.040944 | -1.17984 | 0.252    | 0.369754 | -5.81104 |

|           |          |          |          |          |          |          |
|-----------|----------|----------|----------|----------|----------|----------|
| CTNNA3    | 0.328176 | 0.075545 | 1.179706 | 0.252052 | 0.369803 | -5.81119 |
| DHX8      | -0.17675 | 0.196121 | -1.17934 | 0.252197 | 0.369987 | -5.81161 |
| C5orf39   | -0.30882 | 0.208463 | -1.17865 | 0.252465 | 0.370352 | -5.81239 |
| C12orf65  | 0.22593  | 0.030493 | 1.178344 | 0.252583 | 0.370497 | -5.81273 |
| CFB       | 0.447279 | 0.035077 | 1.158594 | 0.261875 | 0.381019 | -5.81274 |
| MBOAT7    | -0.39448 | 0.475472 | -1.17807 | 0.252689 | 0.370598 | -5.81304 |
| AKR1C3    | 0.506089 | -0.68101 | 1.178033 | 0.252704 | 0.370598 | -5.81308 |
| SH3BP1    | -0.24198 | 0.357087 | -1.17799 | 0.25272  | 0.370598 | -5.81313 |
| SLC13A3   | 0.423185 | -0.15198 | 1.177387 | 0.252955 | 0.370877 | -5.81381 |
| FAM21C    | -0.605   | 0.659908 | -1.17675 | 0.253205 | 0.371216 | -5.81453 |
| PIP5K1P1  | 0.328612 | -0.11535 | 1.112666 | 0.281461 | 0.402374 | -5.81466 |
| PDE4A     | -0.43066 | 0.709419 | -1.17632 | 0.253372 | 0.371416 | -5.81502 |
| C14orf33  | -0.36989 | 0.083998 | -1.17628 | 0.253386 | 0.371416 | -5.81506 |
| RPAP3     | -0.31731 | 0.257499 | -1.17625 | 0.253399 | 0.371416 | -5.81509 |
| SPCS2     | -0.18955 | 0.005458 | -1.17599 | 0.253498 | 0.371535 | -5.81538 |
| C6orf204  | -0.39676 | -0.40162 | -1.1756  | 0.253651 | 0.371703 | -5.81582 |
| FAM86FP   | 0.319951 | -0.03054 | 1.175339 | 0.253755 | 0.371827 | -5.81612 |
| EXOSC2    | -0.43217 | 0.291572 | -1.1749  | 0.253926 | 0.37205  | -5.81661 |
| PRDM1     | 0.37014  | 0.069272 | 1.174634 | 0.25403  | 0.372161 | -5.81691 |
| TRMT2B    | -0.1471  | 0.017829 | -1.17461 | 0.25404  | 0.372161 | -5.81694 |
| GXYLT1    | 0.111304 | -0.03376 | 1.120757 | 0.277232 | 0.397809 | -5.81696 |
| KIF24     | 0.382653 | -0.64108 | 1.154676 | 0.263435 | 0.382862 | -5.81708 |
| PITX2     | -0.33653 | -0.09025 | -1.16536 | 0.258398 | 0.37708  | -5.8171  |
| PWWP2B    | -0.22254 | 0.393832 | -1.17437 | 0.254135 | 0.372273 | -5.81722 |
| ZNF280B   | 0.16836  | -0.17689 | 1.17424  | 0.254184 | 0.372317 | -5.81736 |
| CD200     | -0.38017 | 0.341535 | -1.17413 | 0.254229 | 0.372355 | -5.81749 |
| LRP1B     | -0.29406 | -0.13653 | -1.16498 | 0.258549 | 0.377232 | -5.81752 |
| ZNF676    | -0.38953 | -0.0755  | -1.17391 | 0.254313 | 0.372449 | -5.81773 |
| LOC10013: | -0.28375 | 0.091792 | -1.17383 | 0.254344 | 0.372467 | -5.81782 |
| FOXP2     | -0.516   | 0.178324 | -1.17334 | 0.254538 | 0.372724 | -5.81838 |
| UBAC2     | -0.16756 | -0.00636 | -1.17318 | 0.254601 | 0.372788 | -5.81855 |
| LOC10013: | 0.39349  | -0.28095 | 1.172664 | 0.254801 | 0.373054 | -5.81913 |
| WASF2     | -0.33138 | 0.821621 | -1.17254 | 0.254851 | 0.373099 | -5.81927 |
| OBSCN     | -0.27142 | 0.233134 | -1.172   | 0.255063 | 0.373381 | -5.81988 |
| ROR1      | 0.529631 | -0.00102 | 1.17189  | 0.255105 | 0.373414 | -5.82    |
| TRERF1    | 0.260735 | -0.05065 | 1.1718   | 0.25514  | 0.373438 | -5.8201  |
| CES5A     | -0.41855 | 0.141745 | -1.17167 | 0.25519  | 0.373479 | -5.82025 |
| CCT6A     | 0.263271 | -0.23584 | 1.171632 | 0.255206 | 0.373479 | -5.82029 |
| BHLHE40   | -0.38409 | 0.130804 | -1.17141 | 0.255293 | 0.373531 | -5.82054 |
| CHRNA4    | -0.39041 | 0.17351  | -1.1714  | 0.255299 | 0.373531 | -5.82056 |
| GRASP     | 0.30746  | 0.016851 | 1.171203 | 0.255374 | 0.373614 | -5.82077 |
| BRK1      | -0.13274 | -0.06667 | -1.17051 | 0.255645 | 0.373951 | -5.82155 |
| BRD4      | -0.31988 | 0.645833 | -1.17047 | 0.255662 | 0.373951 | -5.8216  |
| AMDHD2    | -0.26743 | 0.316666 | -1.17026 | 0.255746 | 0.374046 | -5.82184 |
| RBM26     | -0.34797 | 0.119306 | -1.17013 | 0.255795 | 0.374064 | -5.82198 |
| LAYN      | -0.3835  | 0.410562 | -1.17013 | 0.255797 | 0.374064 | -5.82198 |
| ABTB1     | -0.34895 | 0.376373 | -1.16994 | 0.25587  | 0.374132 | -5.82219 |

|           |          |          |          |          |          |          |
|-----------|----------|----------|----------|----------|----------|----------|
| LINC00087 | 0.295283 | -0.18716 | 1.169654 | 0.255983 | 0.374253 | -5.82251 |
| DEF6      | -0.20448 | 0.351287 | -1.16913 | 0.25619  | 0.374471 | -5.8231  |
| UNQ6494   | -0.24669 | -0.0228  | -1.14887 | 0.265761 | 0.385413 | -5.8235  |
| LINC00305 | 0.41825  | -0.0455  | 1.122777 | 0.275619 | 0.396162 | -5.82422 |
| ENTPD5    | 0.214924 | -0.02217 | 1.16809  | 0.256599 | 0.375013 | -5.82427 |
| ARPM1     | -0.1302  | 0.083037 | -1.16783 | 0.256701 | 0.375134 | -5.82456 |
| LINC00474 | -0.2346  | 0.031098 | -1.16755 | 0.256811 | 0.37523  | -5.82487 |
| KLHDC2    | -0.22442 | -0.24594 | -1.16752 | 0.256824 | 0.37523  | -5.82491 |
| GLRA2     | -0.21804 | 0.050557 | -1.15817 | 0.261247 | 0.380445 | -5.8251  |
| UBAP1     | -0.27788 | 0.174548 | -1.16732 | 0.256901 | 0.375298 | -5.82513 |
| SLC29A2   | -0.17013 | -0.00262 | -1.1673  | 0.256909 | 0.375298 | -5.82515 |
| TSEN2     | -0.30677 | 0.261563 | -1.16661 | 0.257182 | 0.375668 | -5.82592 |
| AEN       | -0.42752 | 0.314684 | -1.1663  | 0.257303 | 0.375794 | -5.82627 |
| LCE2A     | 0.190462 | -0.45952 | 1.166294 | 0.257307 | 0.375794 | -5.82628 |
| WFS1      | 0.279448 | 0.268197 | 1.16625  | 0.257325 | 0.375794 | -5.82633 |
| ICA1L     | -0.23698 | 0.03344  | -1.16539 | 0.257666 | 0.376236 | -5.8273  |
| KCTD14    | -0.82407 | 1.003234 | -1.11093 | 0.281329 | 0.402303 | -5.8275  |
| RAG1      | -0.3526  | 0.329654 | -1.156   | 0.262113 | 0.381309 | -5.82752 |
| TAAR8     | -0.36559 | -0.00584 | -1.16457 | 0.25799  | 0.376652 | -5.82821 |
| MBNL1     | -0.32756 | 0.411653 | -1.16428 | 0.258103 | 0.376749 | -5.82853 |
| BRAF      | 0.169641 | -0.07191 | 1.164258 | 0.258112 | 0.376749 | -5.82856 |
| RAD9B     | -0.20202 | -0.00699 | -1.16425 | 0.258114 | 0.376749 | -5.82856 |
| ZNF16     | -0.27227 | 0.357222 | -1.16418 | 0.258142 | 0.376763 | -5.82864 |
| ELF3      | -0.30968 | 0.279789 | -1.16411 | 0.258171 | 0.376777 | -5.82872 |
| LOC100125 | -0.37326 | 0.10907  | -1.15483 | 0.26258  | 0.381899 | -5.82881 |
| TSPAN17   | -0.24915 | 0.260297 | -1.15479 | 0.262597 | 0.381899 | -5.82886 |
| WNT5A     | 0.089334 | -0.01985 | 1.14386  | 0.267778 | 0.387736 | -5.82901 |
| LOC285548 | -0.34312 | 0.069417 | -1.16328 | 0.258498 | 0.377198 | -5.82965 |
| PPFIA3    | 0.211138 | 0.090249 | 1.163127 | 0.25856  | 0.377232 | -5.82982 |
| LOC100133 | -0.15179 | 0.001132 | -1.10855 | 0.282326 | 0.403375 | -5.83004 |
| LRRCC1    | 0.124047 | -0.0169  | 1.153467 | 0.263124 | 0.382495 | -5.83032 |
| GAST      | 0.229508 | -0.23744 | 1.153162 | 0.263246 | 0.382644 | -5.83066 |
| CD74      | -0.40333 | 0.7171   | -1.16227 | 0.258901 | 0.377701 | -5.83078 |
| MXD1      | -0.40018 | 0.229683 | -1.16207 | 0.258977 | 0.377784 | -5.831   |
| NP1P      | -0.33354 | 0.557921 | -1.16188 | 0.259052 | 0.37786  | -5.83121 |
| FASLG     | 0.539012 | 0.040937 | 1.161847 | 0.259067 | 0.37786  | -5.83125 |
| C8orf48   | -0.09835 | 0.01967  | -1.16149 | 0.25921  | 0.378039 | -5.83165 |
| ZNF536    | -0.3499  | -0.14936 | -1.15174 | 0.263816 | 0.383274 | -5.83223 |
| RAB33A    | -0.2595  | 0.028013 | -1.16055 | 0.259584 | 0.378539 | -5.8327  |
| CHI3L2    | -0.56739 | 0.714559 | -1.16053 | 0.259591 | 0.378539 | -5.83272 |
| SPATA4    | 0.264333 | -0.36327 | 1.160179 | 0.25973  | 0.378661 | -5.83311 |
| NDUFAF2   | -0.36048 | 0.28301  | -1.16017 | 0.259733 | 0.378661 | -5.83312 |
| BTN3A2    | -0.33294 | 0.518645 | -1.1598  | 0.259882 | 0.378823 | -5.83354 |
| CAPN12    | -0.32978 | 0.17056  | -1.15957 | 0.259971 | 0.378924 | -5.83378 |
| MAP4K4    | -0.36769 | 0.550579 | -1.15933 | 0.260068 | 0.379036 | -5.83405 |
| MGC39372  | -0.38051 | 0.44065  | -1.15918 | 0.260127 | 0.379095 | -5.83422 |
| PTPN23    | -0.19994 | 0.544498 | -1.15908 | 0.260166 | 0.379124 | -5.83433 |

|           |          |          |          |          |          |          |
|-----------|----------|----------|----------|----------|----------|----------|
| RGS17     | 0.565819 | -0.64786 | 1.094105 | 0.28929  | 0.411376 | -5.83434 |
| TECTB     | -0.30339 | -0.36353 | -1.0816  | 0.295599 | 0.418197 | -5.83445 |
| RAB3C     | 0.2015   | 0.021098 | 1.149683 | 0.264641 | 0.384128 | -5.8345  |
| ZDHHC2    | -0.38245 | -0.20018 | -1.15831 | 0.260475 | 0.379523 | -5.83519 |
| CD101     | 0.413108 | 0.332265 | 1.158275 | 0.260488 | 0.379523 | -5.83523 |
| NANOS1    | -0.45221 | 0.18712  | -1.15825 | 0.260498 | 0.379523 | -5.83526 |
| DBN1      | -0.28978 | 0.672558 | -1.15814 | 0.260543 | 0.37956  | -5.83538 |
| MCF2L     | 0.330608 | -0.19852 | 1.157587 | 0.260762 | 0.379851 | -5.83599 |
| CCNO      | -0.35805 | -0.24402 | -1.14833 | 0.265185 | 0.384778 | -5.836   |
| CEP57L1   | -0.24862 | 0.063572 | -1.13723 | 0.270468 | 0.390505 | -5.83627 |
| EIF4E2    | -0.14285 | 0.068155 | -1.1569  | 0.261037 | 0.380223 | -5.83676 |
| PPP1R14A  | -0.40855 | 0.791125 | -1.15669 | 0.26112  | 0.380315 | -5.83699 |
| ANKRD39   | -0.21607 | 0.099895 | -1.15664 | 0.261139 | 0.380315 | -5.83705 |
| XKR3      | 0.408817 | -0.08567 | 1.156254 | 0.261294 | 0.380484 | -5.83748 |
| RXFP1     | -0.16422 | 0.011927 | -1.15604 | 0.261379 | 0.38058  | -5.83771 |
| TRANK1    | 0.436333 | 0.254269 | 1.155951 | 0.261415 | 0.380604 | -5.83781 |
| GNPDA2    | -0.37571 | -0.37285 | -1.03486 | 0.316254 | 0.440809 | -5.838   |
| C16orf61  | -0.27573 | -0.23727 | -1.15573 | 0.261504 | 0.380704 | -5.83806 |
| TAX1BP1   | -0.37392 | -0.53307 | -1.15549 | 0.2616   | 0.380793 | -5.83833 |
| AKR1B10   | -0.41489 | 0.031458 | -1.15544 | 0.261621 | 0.380793 | -5.83839 |
| FUBP1     | 0.384504 | 0.012449 | 1.155431 | 0.261623 | 0.380793 | -5.83839 |
| ZNF3      | -0.17875 | 0.067933 | -1.15528 | 0.261683 | 0.380853 | -5.83856 |
| CNTN4     | 0.097152 | -0.01943 | 1.155133 | 0.261742 | 0.38091  | -5.83872 |
| MT2A      | 0.902591 | -0.09404 | 1.155006 | 0.261793 | 0.380956 | -5.83886 |
| LOC10050! | 0.318927 | -0.20545 | 1.154533 | 0.261982 | 0.381146 | -5.83939 |
| CDK20     | 0.312182 | -0.00018 | 1.153114 | 0.26255  | 0.381888 | -5.84096 |
| CETN4P    | 0.23756  | 0.060824 | 1.132425 | 0.272426 | 0.392697 | -5.8415  |
| TRPA1     | 0.293212 | 0.011541 | 1.15251  | 0.262792 | 0.382155 | -5.84163 |
| TLE4      | -0.32109 | 0.721889 | -1.15245 | 0.262818 | 0.382164 | -5.8417  |
| VPS13A    | 0.336708 | -0.42429 | 1.152342 | 0.26286  | 0.382192 | -5.84182 |
| LOC10050! | -0.22483 | 0.12352  | -1.15194 | 0.263023 | 0.382376 | -5.84227 |
| TMEM164   | 0.334544 | -0.23031 | 1.150999 | 0.263399 | 0.382838 | -5.8433  |
| ACOX3     | -0.62362 | 0.520237 | -1.15073 | 0.263506 | 0.382937 | -5.8436  |
| JAG1      | -0.58148 | 0.356652 | -1.15064 | 0.263542 | 0.38296  | -5.8437  |
| RPUSD1    | -0.21124 | 0.150218 | -1.15053 | 0.263588 | 0.383    | -5.84383 |
| CDH12     | 0.295679 | -0.19005 | 1.150259 | 0.263696 | 0.383128 | -5.84412 |
| KRT33A    | 0.162057 | -0.29949 | 1.149886 | 0.263846 | 0.383289 | -5.84453 |
| C6orf72   | -0.16328 | -0.10732 | -1.14976 | 0.263898 | 0.383335 | -5.84468 |
| ACVR1C    | 0.096048 | -0.01921 | 1.149152 | 0.264142 | 0.383661 | -5.84535 |
| OR7A17    | 0.256827 | -0.26521 | 1.148852 | 0.264263 | 0.383807 | -5.84568 |
| C9orf123  | -0.55507 | 0.26426  | -1.14881 | 0.264281 | 0.383807 | -5.84573 |
| LCMT2     | -0.2615  | 0.223387 | -1.14865 | 0.264344 | 0.38387  | -5.8459  |
| DNAJC11   | -0.30399 | 0.485549 | -1.14858 | 0.264371 | 0.38388  | -5.84597 |
| TBPL1     | -0.1964  | 0.019252 | -1.14845 | 0.264425 | 0.383931 | -5.84612 |
| RUFY3     | -0.28113 | 0.427321 | -1.14832 | 0.264475 | 0.383951 | -5.84626 |
| EGFR      | 0.273248 | 0.084887 | 1.148317 | 0.264478 | 0.383951 | -5.84627 |
| GALNT8    | 0.231956 | -0.10896 | 1.138862 | 0.269016 | 0.38904  | -5.8464  |

|           |          |          |          |          |          |          |
|-----------|----------|----------|----------|----------|----------|----------|
| LINC00319 | 0.227735 | -0.09089 | 1.093003 | 0.288913 | 0.41107  | -5.84651 |
| TLE3      | -0.41665 | 0.538532 | -1.14789 | 0.26465  | 0.384128 | -5.84674 |
| DLX5      | 0.147467 | -0.09033 | 1.147869 | 0.264659 | 0.384128 | -5.84676 |
| LRFN4     | 0.270072 | -0.05085 | 1.147723 | 0.264718 | 0.384185 | -5.84693 |
| EHD3      | 0.3762   | 0.192727 | 1.147581 | 0.264775 | 0.384239 | -5.84708 |
| DPY19L2P4 | -0.43715 | -0.29446 | -0.92576 | 0.374676 | 0.499993 | -5.84754 |
| CD109     | 0.318488 | -0.20442 | 1.137594 | 0.269533 | 0.389638 | -5.84779 |
| POU4F1    | -0.20772 | 0.047093 | -1.14642 | 0.265243 | 0.384833 | -5.84836 |
| AMOT      | -0.09546 | 0.019093 | -1.14594 | 0.265437 | 0.385087 | -5.84889 |
| PTTG1     | -0.39659 | 0.289467 | -1.14584 | 0.265479 | 0.385104 | -5.84901 |
| IL20RA    | 0.155879 | -0.07359 | 1.145814 | 0.265488 | 0.385104 | -5.84903 |
| CMTM2     | -0.54248 | 0.188593 | -1.14541 | 0.265652 | 0.385313 | -5.84948 |
| STX6      | -0.22077 | 0.090834 | -1.14534 | 0.265679 | 0.385323 | -5.84955 |
| NAG20     | -0.22319 | 0.121712 | -1.13581 | 0.270261 | 0.390265 | -5.84974 |
| C8orf71   | 0.222425 | -0.2614  | 1.095893 | 0.289483 | 0.411577 | -5.84978 |
| ZNF317    | 0.165177 | -0.08479 | 1.145    | 0.265817 | 0.385467 | -5.84993 |
| DAK       | -0.21823 | 0.480675 | -1.14474 | 0.265922 | 0.385589 | -5.85021 |
| NHEJ1     | 0.317154 | 0.180794 | 1.144088 | 0.266187 | 0.385935 | -5.85093 |
| FGFR2     | 0.23548  | -0.14487 | 1.144055 | 0.2662   | 0.385935 | -5.85097 |
| LOC100125 | 0.30859  | -0.17322 | 1.143735 | 0.266329 | 0.386049 | -5.85132 |
| OAF       | -0.37979 | 0.860212 | -1.14373 | 0.266333 | 0.386049 | -5.85133 |
| PARP15    | -0.3812  | 0.39637  | -1.14372 | 0.266337 | 0.386049 | -5.85134 |
| SLC6A11   | -0.38328 | 0.108649 | -1.14332 | 0.266497 | 0.386252 | -5.85178 |
| MALAT1    | 0.298793 | -0.62895 | 1.142996 | 0.266629 | 0.386415 | -5.85213 |
| AZU1      | 0.945164 | -0.21387 | 1.142882 | 0.266675 | 0.386453 | -5.85226 |
| HLA-DQB2  | 0.668819 | 0.096286 | 1.142817 | 0.266702 | 0.386463 | -5.85233 |
| SPOCD1    | -0.61059 | 0.203333 | -1.12176 | 0.276815 | 0.397385 | -5.85306 |
| LOC100289 | 0.270734 | -0.04612 | 1.142024 | 0.267023 | 0.3869   | -5.8532  |
| MS4A7     | 0.493226 | 0.07336  | 1.141911 | 0.267069 | 0.386938 | -5.85333 |
| KHK       | 0.275334 | 0.151047 | 1.141831 | 0.267102 | 0.386941 | -5.85342 |
| MRPL49    | -0.37258 | 0.477355 | -1.14181 | 0.26711  | 0.386941 | -5.85344 |
| KIF18A    | -0.48773 | -0.13661 | -0.93444 | 0.366067 | 0.491685 | -5.85371 |
| TRPV2     | 0.151507 | -0.13605 | 1.141513 | 0.267231 | 0.387061 | -5.85376 |
| DNAJC18   | -0.15223 | 0.004606 | -1.14151 | 0.267233 | 0.387061 | -5.85377 |
| KIAA1656  | -0.19851 | 0.103128 | -1.13201 | 0.271813 | 0.391985 | -5.85388 |
| ERAP2     | 0.549209 | 0.228375 | 1.141401 | 0.267276 | 0.387095 | -5.85389 |
| RPS4Y2    | -0.78979 | -0.05103 | -1.00615 | 0.330441 | 0.455097 | -5.85446 |
| STXBP1    | -0.35352 | 0.379454 | -1.14086 | 0.267497 | 0.387386 | -5.85448 |
| KIAA1919  | -0.18627 | 0.230021 | -1.14081 | 0.267518 | 0.387388 | -5.85454 |
| TEX14     | 0.511604 | 0.104272 | 1.131246 | 0.272128 | 0.392379 | -5.85472 |
| CFTR      | -0.19544 | 0.117132 | -1.14006 | 0.267822 | 0.387771 | -5.85536 |
| TLR6      | -0.39232 | 0.157298 | -1.14    | 0.267845 | 0.387775 | -5.85542 |
| TMEM203   | -0.17612 | 0.045549 | -1.13974 | 0.267952 | 0.387902 | -5.85571 |
| FEN1      | -0.41058 | 0.401649 | -1.13961 | 0.268005 | 0.38795  | -5.85586 |
| FAM40B    | 0.293052 | 0.031933 | 1.139443 | 0.268072 | 0.388018 | -5.85604 |
| TUBB8     | 0.650741 | -0.18702 | 1.139381 | 0.268097 | 0.388026 | -5.8561  |
| PAOX      | 0.362086 | -0.03952 | 1.13854  | 0.26844  | 0.388494 | -5.85703 |

|           |          |          |          |          |          |          |
|-----------|----------|----------|----------|----------|----------|----------|
| TUFM      | 0.150703 | -0.10731 | 1.13841  | 0.268493 | 0.388541 | -5.85717 |
| LOC100127 | -0.26508 | -0.17419 | -1.13831 | 0.268532 | 0.388569 | -5.85727 |
| MUC15     | 0.40271  | -0.71785 | 1.091704 | 0.28871  | 0.410879 | -5.85735 |
| SAMD15    | -0.11406 | -0.00329 | -1.13794 | 0.268687 | 0.388751 | -5.85769 |
| CYP7A1    | -0.17526 | 0.082456 | -1.13791 | 0.268697 | 0.388751 | -5.85772 |
| PPP1R37   | -0.19096 | 0.253009 | -1.13782 | 0.268735 | 0.388777 | -5.85782 |
| ZCCHC14   | 0.292175 | -0.06116 | 1.137582 | 0.26883  | 0.388866 | -5.85808 |
| TFB1M     | -0.25295 | 0.267606 | -1.13755 | 0.268844 | 0.388866 | -5.85811 |
| PHF21A    | -0.39305 | 0.688634 | -1.13752 | 0.268856 | 0.388866 | -5.85814 |
| LOC100133 | -0.21275 | 0.258693 | -1.13735 | 0.268925 | 0.388937 | -5.85833 |
| GSTO2     | 0.462952 | 0.13745  | 1.136757 | 0.269167 | 0.389229 | -5.85898 |
| TREML1    | -0.45591 | 0.731517 | -1.13621 | 0.269392 | 0.389517 | -5.85958 |
| ABLIM2    | 0.243545 | -0.3752  | 1.136174 | 0.269405 | 0.389517 | -5.85962 |
| TAOK2     | -0.12423 | 0.312266 | -1.13597 | 0.269487 | 0.389605 | -5.85984 |
| MED30     | -0.49398 | 0.237109 | -1.08021 | 0.294417 | 0.416972 | -5.85992 |
| ASCL1     | -0.12913 | 0.009455 | -1.13582 | 0.269549 | 0.389638 | -5.86    |
| TMEM184   | 0.154369 | -0.37437 | 1.135635 | 0.269626 | 0.38972  | -5.86021 |
| PACS1     | -0.35273 | 0.530401 | -1.13547 | 0.269693 | 0.389789 | -5.86039 |
| LBR       | -0.40052 | -0.40317 | -1.13541 | 0.269717 | 0.389795 | -5.86045 |
| TYW3      | -0.23153 | 0.198592 | -1.13529 | 0.269766 | 0.389837 | -5.86058 |
| C17orf77  | 0.230455 | -0.09748 | 1.135027 | 0.269874 | 0.389964 | -5.86087 |
| TGIF2LY   | -0.23639 | 0.094047 | -1.13482 | 0.269957 | 0.390055 | -5.86109 |
| KIAA0141  | -0.18261 | 0.258843 | -1.13474 | 0.26999  | 0.390074 | -5.86118 |
| HR44      | 0.200151 | -0.0639  | 1.134577 | 0.270058 | 0.390144 | -5.86137 |
| TTC23     | -0.20654 | 0.291536 | -1.13445 | 0.270111 | 0.390179 | -5.86151 |
| CNTNAP5   | -0.09341 | 0.018682 | -1.13438 | 0.270138 | 0.390179 | -5.86158 |
| TRMT112   | 0.244541 | -0.11784 | 1.134371 | 0.270143 | 0.390179 | -5.86159 |
| SH2D4A    | -0.29475 | 0.116908 | -1.13432 | 0.270164 | 0.390182 | -5.86165 |
| GCNT4     | 0.274868 | -0.26741 | 0.941285 | 0.365329 | 0.491099 | -5.86201 |
| ATXN7L2   | 0.175264 | 0.075187 | 1.133958 | 0.270312 | 0.390309 | -5.86204 |
| CDH18     | 0.430907 | -0.74026 | 0.964398 | 0.352625 | 0.478685 | -5.86259 |
| PLCL1     | -0.57415 | 0.396023 | -1.13344 | 0.270522 | 0.390555 | -5.8626  |
| KCNMB1    | -0.2946  | 0.387944 | -1.13309 | 0.270667 | 0.390735 | -5.86299 |
| KRTAP3-3  | -0.22116 | -0.24258 | -1.07694 | 0.295835 | 0.418466 | -5.86332 |
| WWC1      | -0.37126 | 0.300749 | -1.13258 | 0.270875 | 0.390976 | -5.86354 |
| RPS2P32   | -0.22485 | 0.080829 | -1.13257 | 0.270883 | 0.390976 | -5.86356 |
| C3orf15   | -0.29067 | -0.01569 | -1.13254 | 0.270894 | 0.390976 | -5.86359 |
| GPR82     | 0.154676 | -0.1644  | 1.123061 | 0.275501 | 0.396125 | -5.8636  |
| LOC100506 | 0.385572 | -0.40847 | 1.123013 | 0.275521 | 0.396125 | -5.86366 |
| TAS2R5    | 0.131554 | -0.30541 | 1.132418 | 0.270943 | 0.391018 | -5.86372 |
| ATP7A     | -0.31728 | -0.30076 | -1.03748 | 0.316094 | 0.440727 | -5.86393 |
| IPO5      | 0.285249 | -0.1934  | 1.132047 | 0.271095 | 0.391183 | -5.86413 |
| PSRC1     | -0.22655 | 0.180121 | -1.13204 | 0.271097 | 0.391183 | -5.86413 |
| B3GALT6   | -0.28392 | 0.168247 | -1.13192 | 0.271147 | 0.391227 | -5.86427 |
| ATL1      | 0.26019  | 0.079321 | 1.131408 | 0.271357 | 0.391501 | -5.86482 |
| PSG4      | -0.22619 | -0.14831 | -1.11065 | 0.281444 | 0.402374 | -5.865   |
| FLJ10661  | 0.165033 | 0.072656 | 1.131209 | 0.271439 | 0.39159  | -5.86504 |

|           |          |          |          |          |          |          |
|-----------|----------|----------|----------|----------|----------|----------|
| ADCY7     | -0.44519 | 0.378333 | -1.13116 | 0.271459 | 0.39159  | -5.86509 |
| ZFYVE27   | -0.12761 | 0.155376 | -1.1311  | 0.271485 | 0.391598 | -5.86516 |
| RPLP1     | 0.320141 | -0.28405 | 1.131017 | 0.271518 | 0.391618 | -5.86525 |
| UBA5      | -0.28915 | 0.340232 | -1.1309  | 0.271567 | 0.391659 | -5.86538 |
| KLK7      | 0.243701 | 0.063106 | 1.121025 | 0.276345 | 0.396907 | -5.8658  |
| XPO5      | 0.254657 | 0.076587 | 1.130121 | 0.271887 | 0.392063 | -5.86623 |
| MYO5B     | 0.214421 | -0.15363 | 1.120217 | 0.27668  | 0.39728  | -5.86668 |
| NAPEPLD   | -0.26798 | 0.070775 | -1.12949 | 0.272146 | 0.392379 | -5.86691 |
| FAM86DP   | -0.14385 | 0.068188 | -1.08237 | 0.292728 | 0.41515  | -5.86714 |
| TRPS1     | 0.298665 | -0.20146 | 1.08226  | 0.292777 | 0.41519  | -5.86726 |
| DACT2     | -0.2696  | -0.08482 | -1.11965 | 0.276916 | 0.397472 | -5.86729 |
| IKZF3     | -0.19685 | 0.260824 | -1.12903 | 0.272337 | 0.392625 | -5.86742 |
| RBP1      | -0.17306 | 0.01543  | -1.12882 | 0.272423 | 0.392697 | -5.86764 |
| LOC647589 | 0.390261 | 0.02792  | 1.108174 | 0.282483 | 0.403542 | -5.86765 |
| ATP5I     | -0.49119 | 0.650656 | -1.12864 | 0.272494 | 0.392765 | -5.86783 |
| RALGDS    | 0.319747 | 0.262566 | 1.128346 | 0.272617 | 0.392914 | -5.86816 |
| OR1C1     | -0.18394 | 0.038226 | -1.12814 | 0.272704 | 0.393009 | -5.86839 |
| TPRN      | 0.216832 | 0.235563 | 1.127936 | 0.272786 | 0.393079 | -5.8686  |
| MYH9      | -0.37103 | 0.583713 | -1.12792 | 0.272792 | 0.393079 | -5.86862 |
| FAM69B    | -0.42152 | 0.416279 | -1.12785 | 0.272822 | 0.393094 | -5.8687  |
| FOXN3     | 0.252088 | -0.14768 | 1.127483 | 0.272973 | 0.393273 | -5.8691  |
| RTN4R     | 0.328262 | 0.048432 | 1.12745  | 0.272987 | 0.393273 | -5.86913 |
| C1orf213  | 0.289228 | -0.03307 | 1.117713 | 0.277722 | 0.398425 | -5.86938 |
| URB2      | 0.244331 | -0.01028 | 1.127214 | 0.273084 | 0.393384 | -5.86939 |
| PAQR6     | -0.4342  | 0.525076 | -1.12713 | 0.273121 | 0.393408 | -5.86949 |
| NEIL1     | 0.246755 | -0.14754 | 1.126789 | 0.273259 | 0.393579 | -5.86985 |
| SCMH1     | -0.22563 | 0.384629 | -1.12657 | 0.273349 | 0.393678 | -5.87008 |
| FHL2      | 0.474447 | 0.204419 | 1.126012 | 0.27358  | 0.393934 | -5.87069 |
| NDUFB9    | -0.22166 | 0.034841 | -1.126   | 0.273587 | 0.393934 | -5.87071 |
| SPDYE2    | -0.22144 | -0.06362 | -1.12592 | 0.273617 | 0.393949 | -5.87079 |
| CCR2      | 0.532127 | -0.34053 | 1.125493 | 0.273795 | 0.394176 | -5.87126 |
| UBE4B     | 0.289766 | -0.38002 | 1.125344 | 0.273857 | 0.394227 | -5.87142 |
| EIF3M     | -0.35713 | 0.47712  | -1.12505 | 0.273978 | 0.394338 | -5.87174 |
| PDK4      | -0.53014 | 0.338868 | -1.12502 | 0.273989 | 0.394338 | -5.87177 |
| ACAT2     | -0.38887 | 0.297593 | -1.12498 | 0.274008 | 0.394338 | -5.87182 |
| C7orf13   | 0.374913 | -0.11018 | 1.115432 | 0.278673 | 0.39938  | -5.87183 |
| FLJ35024  | 0.188805 | -0.21191 | 1.090846 | 0.290681 | 0.412969 | -5.87193 |
| FLJ40288  | 0.334253 | -0.04021 | 1.124761 | 0.274098 | 0.394438 | -5.87205 |
| LOC494150 | -0.33863 | 0.360773 | -1.1245  | 0.274208 | 0.394567 | -5.87234 |
| F2RL2     | 0.311089 | 0.101298 | 1.124368 | 0.274261 | 0.394615 | -5.87248 |
| ARHGAP21  | 0.490645 | 0.076859 | 1.077247 | 0.294953 | 0.417611 | -5.87249 |
| CLDN2     | 0.201466 | -0.13574 | 1.073938 | 0.298914 | 0.421701 | -5.87273 |
| C1orf133  | -0.21067 | 0.057803 | -1.12393 | 0.274443 | 0.394844 | -5.87296 |
| LOC645206 | 0.154931 | -0.10881 | 1.103154 | 0.284599 | 0.405972 | -5.873   |
| RFPL1     | 0.30083  | -0.16929 | 1.123852 | 0.274474 | 0.394844 | -5.87304 |
| RABL5     | -0.38108 | 0.342992 | -1.12381 | 0.274493 | 0.394844 | -5.87309 |
| C21orf30  | 0.21523  | -0.08662 | 1.123787 | 0.274501 | 0.394844 | -5.87311 |

|           |          |          |          |          |          |          |
|-----------|----------|----------|----------|----------|----------|----------|
| FNBP4     | -0.34283 | 0.351425 | -1.12373 | 0.274526 | 0.394852 | -5.87317 |
| ODAM      | 0.286002 | -0.31752 | 1.067425 | 0.299993 | 0.422821 | -5.87318 |
| LIN54     | -0.39815 | 0.127833 | -1.07581 | 0.295581 | 0.418197 | -5.87399 |
| PHF17     | 0.196466 | -0.10253 | 1.122907 | 0.274866 | 0.395311 | -5.87406 |
| C10orf125 | 0.420113 | -0.37561 | 1.122636 | 0.274978 | 0.395443 | -5.87435 |
| ZNF641    | -0.33656 | 0.360806 | -1.12242 | 0.275069 | 0.395545 | -5.87459 |
| TMEM136   | -0.40876 | -0.00134 | -1.11246 | 0.279918 | 0.400704 | -5.87503 |
| LOC64572  | 0.253592 | -0.32567 | 1.121148 | 0.275596 | 0.396162 | -5.87597 |
| FAM35A    | -0.31688 | -0.2629  | -1.1211  | 0.275615 | 0.396162 | -5.87602 |
| NACAP1    | -0.54583 | 0.674874 | -1.12094 | 0.275683 | 0.396224 | -5.87619 |
| ZSWIM6    | -0.32484 | -0.22232 | -1.12074 | 0.275766 | 0.396315 | -5.87641 |
| ATE1      | 0.363322 | 0.142097 | 1.063979 | 0.301509 | 0.424561 | -5.87673 |
| PLXNB1    | 0.10846  | -0.03904 | 1.120434 | 0.275892 | 0.396439 | -5.87674 |
| TCEAL8    | 0.296761 | -0.26138 | 1.12042  | 0.275898 | 0.396439 | -5.87675 |
| TRAP1     | -0.29913 | 0.467635 | -1.12038 | 0.275913 | 0.396439 | -5.87679 |
| TMEM190   | 0.178532 | -0.16924 | 1.120282 | 0.275955 | 0.396471 | -5.8769  |
| TMEM126   | -0.29703 | -0.30749 | -1.12016 | 0.276007 | 0.396515 | -5.87704 |
| MCM3      | 0.328278 | 0.006338 | 1.12011  | 0.276027 | 0.396515 | -5.87709 |
| OPN5      | 0.519454 | -0.02614 | 1.110453 | 0.280758 | 0.401633 | -5.87718 |
| GPR6      | 0.244895 | -0.27025 | 1.11977  | 0.276168 | 0.39669  | -5.87745 |
| KCNG2     | -0.28948 | 0.085273 | -1.01382 | 0.324205 | 0.448874 | -5.8775  |
| CCDC36    | 0.3767   | -0.23376 | 1.07207  | 0.297212 | 0.419717 | -5.87787 |
| KRT74     | -0.15697 | 0.08246  | -1.11931 | 0.27636  | 0.396907 | -5.87795 |
| C14orf43  | 0.227584 | -0.13878 | 1.119132 | 0.276434 | 0.396984 | -5.87814 |
| ATP6AP2   | -0.29457 | -0.23298 | -1.11906 | 0.276465 | 0.396999 | -5.87822 |
| LOC10050  | 0.779926 | -0.23186 | 1.109045 | 0.281349 | 0.402303 | -5.87868 |
| PGGT1B    | 0.52493  | -1.13344 | 0.922738 | 0.374527 | 0.499931 | -5.87886 |
| GLCE      | -0.44293 | 0.009211 | -1.10869 | 0.281501 | 0.402402 | -5.87907 |
| SLC7A9    | -0.27234 | 0.266831 | -1.11825 | 0.276803 | 0.397385 | -5.8791  |
| PRADC1    | -0.22768 | 0.124294 | -1.11823 | 0.27681  | 0.397385 | -5.87912 |
| FLJ42709  | -0.09064 | 0.018128 | -1.11817 | 0.276835 | 0.397385 | -5.87918 |
| FAM155A   | 0.30863  | -0.51514 | 1.117891 | 0.276951 | 0.397493 | -5.87948 |
| CSTF2     | -0.185   | 0.177777 | -1.11757 | 0.277083 | 0.397654 | -5.87983 |
| ACE2      | -0.22031 | 0.01735  | -1.10789 | 0.281835 | 0.402822 | -5.87992 |
| DLEC1     | 0.254692 | 0.20086  | 1.117279 | 0.277206 | 0.397802 | -5.88014 |
| SPDYE8P   | -0.27512 | -0.0246  | -1.1167  | 0.277449 | 0.398091 | -5.88077 |
| ZNF783    | 0.357587 | 0.065735 | 1.116473 | 0.277543 | 0.398196 | -5.88101 |
| TMEM155   | 0.231649 | -0.30719 | 1.106741 | 0.282319 | 0.403375 | -5.88115 |
| NOG       | 0.408345 | 0.080949 | 1.115976 | 0.27775  | 0.398436 | -5.88155 |
| SYT14     | -0.18054 | 0.097245 | -1.1057  | 0.28276  | 0.403819 | -5.88226 |
| OCLN      | 0.388089 | -0.03472 | 1.115208 | 0.278071 | 0.398867 | -5.88237 |
| FOXR1     | 0.301833 | -0.20724 | 1.115152 | 0.278095 | 0.398872 | -5.88244 |
| SEC11C    | -0.37213 | 0.063007 | -1.11508 | 0.278126 | 0.398874 | -5.88252 |
| UTP23     | -0.21325 | 0.084468 | -1.11505 | 0.278137 | 0.398874 | -5.88254 |
| COL9A2    | -0.21325 | 0.131767 | -1.11492 | 0.278192 | 0.398895 | -5.88269 |
| ODF3L1    | 0.169591 | -0.11026 | 1.114632 | 0.278312 | 0.399038 | -5.88299 |
| TRIM7     | -0.42096 | 0.784339 | -1.11409 | 0.278538 | 0.399303 | -5.88357 |



|           |          |          |          |          |          |          |
|-----------|----------|----------|----------|----------|----------|----------|
| CSNK2A2   | -0.3882  | 0.534228 | -1.11404 | 0.278561 | 0.399307 | -5.88363 |
| C22orf40  | 0.409167 | 0.158806 | 1.113939 | 0.278602 | 0.399337 | -5.88374 |
| VAMP1     | -0.43127 | 0.630542 | -1.11387 | 0.278629 | 0.399346 | -5.88381 |
| CHSY3     | -0.26525 | -0.06056 | -1.05702 | 0.304586 | 0.428033 | -5.88386 |
| TRAPPC2P  | -0.44191 | -0.21226 | -1.11363 | 0.27873  | 0.399432 | -5.88407 |
| C9orf150  | -0.39757 | 0.506628 | -1.11345 | 0.278805 | 0.399511 | -5.88426 |
| ARID1B    | 0.241474 | 0.224082 | 1.113048 | 0.278976 | 0.399696 | -5.8847  |
| ARMCX1    | -0.26587 | 0.112145 | -1.06536 | 0.300159 | 0.422964 | -5.8848  |
| HLA-L     | -0.34904 | 0.216975 | -1.1129  | 0.279037 | 0.399754 | -5.88486 |
| CDK4      | 0.321812 | 0.013129 | 1.112855 | 0.279057 | 0.399754 | -5.88491 |
| COL6A1    | 0.192121 | -0.0646  | 1.112636 | 0.279149 | 0.399857 | -5.88514 |
| RFK       | 0.264683 | -0.10686 | 1.11219  | 0.279335 | 0.400095 | -5.88562 |
| STK10     | 0.317441 | 0.423795 | 1.111939 | 0.279441 | 0.400196 | -5.88589 |
| RBX1      | 0.353573 | -0.88795 | 1.111925 | 0.279447 | 0.400196 | -5.8859  |
| XIRP1     | 0.853522 | -0.20823 | 1.111836 | 0.279484 | 0.40022  | -5.886   |
| IGLL5     | 0.45513  | 0.251146 | 1.111754 | 0.279518 | 0.40024  | -5.88609 |
| LOC100507 | -0.34703 | 0.178289 | -1.10206 | 0.284297 | 0.405659 | -5.88614 |
| SLC30A4   | -0.23102 | -0.34812 | -1.11166 | 0.279559 | 0.400269 | -5.88619 |
| SLC22A16  | 0.40093  | -0.07699 | 1.111408 | 0.279664 | 0.40039  | -5.88646 |
| SLC25A5-A | 0.290438 | 0.048353 | 1.101386 | 0.284583 | 0.405972 | -5.88685 |
| HOXC4     | 0.508772 | 0.188473 | 1.110788 | 0.279924 | 0.400704 | -5.88712 |
| GSTM4     | -0.44433 | 0.624299 | -1.11074 | 0.279945 | 0.400705 | -5.88718 |
| SIX2      | -0.17522 | 0.081392 | -1.11031 | 0.280127 | 0.400935 | -5.88764 |
| YTHDC1    | -0.21583 | 0.185415 | -1.11023 | 0.28016  | 0.400954 | -5.88773 |
| LOC100507 | 0.296732 | -0.17098 | 1.11016  | 0.280188 | 0.400965 | -5.8878  |
| PRPF31    | -0.27185 | 0.444397 | -1.1097  | 0.280383 | 0.401214 | -5.88829 |
| ZCRB1     | -0.12275 | 0.024551 | -1.10941 | 0.280503 | 0.401356 | -5.8886  |
| MIR143HG  | 0.244083 | -0.08663 | 1.099609 | 0.285337 | 0.406848 | -5.88874 |
| KLHDC5    | -0.32468 | 0.1242   | -1.10911 | 0.280629 | 0.401507 | -5.88892 |
| YTHDF2    | 0.167961 | -0.10975 | 1.10895  | 0.280697 | 0.401576 | -5.88909 |
| ZC3H12C   | -0.20785 | -0.14155 | -1.08768 | 0.291192 | 0.413451 | -5.88936 |
| LOC100137 | 0.366019 | -0.34689 | 0.61146  | 0.553474 | 0.666427 | -5.88967 |
| C4orf38   | -0.15155 | 0.001824 | -1.09857 | 0.285777 | 0.407238 | -5.88984 |
| RBM4B     | -0.16403 | 0.117979 | -1.10822 | 0.281006 | 0.401959 | -5.88988 |
| SPDYE3    | -0.23704 | 0.032235 | -1.10804 | 0.281081 | 0.40202  | -5.89007 |
| ORAI3     | -0.25015 | 0.217512 | -1.10802 | 0.28109  | 0.40202  | -5.89009 |
| TMEM26    | -0.18657 | 0.02948  | -1.10793 | 0.281128 | 0.402046 | -5.89019 |
| TMED10    | -0.18529 | -0.14513 | -1.1073  | 0.281394 | 0.402337 | -5.89086 |
| C7orf69   | -0.29994 | -0.05093 | -1.09726 | 0.286336 | 0.407945 | -5.89123 |
| LINC00226 | 0.273991 | 0.001775 | 1.106875 | 0.281572 | 0.402475 | -5.89132 |
| KRTAP1-1  | -0.51875 | 0.326707 | -1.08581 | 0.291997 | 0.414383 | -5.89132 |
| KIF12     | 0.397328 | -0.00286 | 1.058913 | 0.30301  | 0.426216 | -5.89143 |
| SOAT1     | -0.3935  | 0.260441 | -1.10579 | 0.28203  | 0.40307  | -5.89247 |
| NAG18     | -0.19477 | 0.021308 | -1.09601 | 0.28687  | 0.408571 | -5.89256 |
| GPD1L     | -0.26901 | 0.336084 | -1.1056  | 0.282111 | 0.403157 | -5.89268 |
| FLVCR1-AS | 0.406008 | 0.143175 | 1.105204 | 0.282278 | 0.403365 | -5.8931  |
| TNFAIP2   | 0.248843 | 0.030046 | 1.104949 | 0.282386 | 0.403431 | -5.89337 |

|           |          |          |          |          |          |          |
|-----------|----------|----------|----------|----------|----------|----------|
| FAM59B    | 0.460175 | 0.10307  | 1.104488 | 0.282581 | 0.403651 | -5.89387 |
| WRB       | -0.22021 | -0.15939 | -1.1042  | 0.282702 | 0.403795 | -5.89417 |
| FGF20     | 0.49301  | -0.26643 | 1.104134 | 0.282731 | 0.403807 | -5.89424 |
| UNC45B    | 0.247957 | -0.04178 | 1.046537 | 0.309267 | 0.432965 | -5.89454 |
| IRF2BP2   | -0.28853 | 0.712531 | -1.10377 | 0.282884 | 0.403967 | -5.89463 |
| KERA      | 0.232428 | 0.084293 | 1.094041 | 0.28771  | 0.409605 | -5.89464 |
| MAP4K5    | 0.23775  | 0.118349 | 1.103612 | 0.282951 | 0.404018 | -5.8948  |
| OR56B1    | -0.1952  | -0.09181 | -1.10359 | 0.282961 | 0.404018 | -5.89482 |
| KLK13     | 0.108755 | -0.46828 | 0.218867 | 0.83081  | 0.890044 | -5.8949  |
| RGPD2     | 0.742042 | -0.63015 | 1.103504 | 0.282997 | 0.40404  | -5.89492 |
| ISCA1     | 0.402149 | -0.16088 | 1.103034 | 0.283196 | 0.404295 | -5.89542 |
| C5orf55   | 0.247645 | -0.11601 | 1.102382 | 0.283473 | 0.40466  | -5.89611 |
| PEX5L-AS2 | 0.212791 | -0.13004 | 1.053908 | 0.305237 | 0.428551 | -5.89655 |
| PRPS1L1   | -0.14699 | 0.030493 | -1.10143 | 0.283875 | 0.405175 | -5.89712 |
| HAUS1     | -0.38269 | -0.36345 | -1.10081 | 0.284138 | 0.405492 | -5.89778 |
| CYP11B2   | 0.350776 | -0.19733 | 1.100561 | 0.284246 | 0.405616 | -5.89805 |
| ATP8A2    | 0.427741 | -0.49626 | 1.100195 | 0.284401 | 0.405779 | -5.89844 |
| LOC100506 | 0.463422 | 0.108883 | 1.090434 | 0.289254 | 0.411373 | -5.89845 |
| FAIM      | -0.38992 | 0.431072 | -1.09981 | 0.284564 | 0.405972 | -5.89885 |
| ANKRD20A  | 0.21441  | -0.09825 | 1.099229 | 0.284812 | 0.406246 | -5.89947 |
| CRYBB1    | 0.262308 | -0.26861 | 1.099179 | 0.284833 | 0.406247 | -5.89952 |
| ZNF235    | -0.30574 | 0.130448 | -1.09904 | 0.284892 | 0.406302 | -5.89967 |
| RDH13     | 0.189338 | 0.006342 | 1.098951 | 0.284931 | 0.406327 | -5.89976 |
| PLA2G2E   | 0.261508 | -0.32714 | 1.077477 | 0.295602 | 0.418197 | -5.90004 |
| RIT2      | 0.284251 | 0.165493 | 1.098548 | 0.285102 | 0.406542 | -5.90019 |
| ARSK      | -0.33849 | 0.13084  | -1.0503  | 0.30685  | 0.43035  | -5.90023 |
| CPS1-IT1  | 0.262253 | -0.34112 | 0.9809   | 0.340505 | 0.465856 | -5.90075 |
| CABS1     | 0.312239 | -0.00712 | 1.088159 | 0.290232 | 0.412536 | -5.90085 |
| ATP1B2    | 0.391162 | -0.22798 | 1.09778  | 0.285429 | 0.406949 | -5.90101 |
| CYP4F8    | -0.44162 | 0.404533 | -1.09773 | 0.285452 | 0.406952 | -5.90106 |
| GDF2      | -0.15192 | 0.043906 | -1.09754 | 0.285531 | 0.407035 | -5.90126 |
| ZNF596    | 0.366697 | -0.12702 | 1.087698 | 0.29043  | 0.412697 | -5.90133 |
| MCM5      | 0.23739  | 0.139993 | 1.097423 | 0.285581 | 0.407048 | -5.90139 |
| CCDC155   | -0.21727 | 0.222411 | -1.09714 | 0.2857   | 0.407187 | -5.90168 |
| FAM22A    | 0.268384 | -0.25599 | 1.097042 | 0.285744 | 0.40722  | -5.90179 |
| ASPN      | -0.12393 | 0.029943 | -1.08709 | 0.290691 | 0.412969 | -5.90197 |
| TBX18     | -0.16372 | 0.078555 | -1.04824 | 0.307774 | 0.431491 | -5.90233 |
| GPR112    | -0.21903 | -0.11606 | -1.0866  | 0.290904 | 0.413161 | -5.90249 |
| ACADS     | -0.25805 | 0.579825 | -1.09633 | 0.286047 | 0.407592 | -5.90254 |
| MAT1A     | 0.268754 | -0.31684 | 1.096261 | 0.286077 | 0.407606 | -5.90262 |
| C6orf97   | -0.54946 | 0.545314 | -1.0861  | 0.291118 | 0.413375 | -5.90301 |
| MID1      | 0.25238  | -0.05915 | 1.095586 | 0.286365 | 0.407957 | -5.90333 |
| C20orf112 | -0.41109 | 0.374971 | -1.09545 | 0.286423 | 0.40801  | -5.90348 |
| GLTSCR1   | -0.17996 | 0.07658  | -1.09445 | 0.286852 | 0.408571 | -5.90454 |
| ADCK1     | -0.28288 | 0.602121 | -1.09438 | 0.28688  | 0.408571 | -5.90461 |
| PDZK1     | -0.23442 | -0.01059 | -1.03625 | 0.313908 | 0.438085 | -5.90492 |
| DBX2      | 0.243221 | -0.03294 | 1.093967 | 0.287058 | 0.408795 | -5.90505 |

|           |          |          |          |          |          |          |
|-----------|----------|----------|----------|----------|----------|----------|
| ZNF300P1  | -0.30338 | 0.100695 | -1.07256 | 0.297742 | 0.420374 | -5.90514 |
| ZDHH4     | 0.203303 | -0.30869 | 1.093354 | 0.28732  | 0.409139 | -5.9057  |
| NRP2      | -0.19759 | 0.00859  | -1.09309 | 0.287435 | 0.409272 | -5.90598 |
| LOC10050  | -0.31829 | -0.25708 | -1.04436 | 0.309516 | 0.433206 | -5.90626 |
| TMEM217   | 0.238534 | -0.22981 | 1.092451 | 0.287707 | 0.409605 | -5.90665 |
| RCBTB2    | -0.44513 | 0.225438 | -1.09221 | 0.287809 | 0.409715 | -5.9069  |
| LOC72861  | -0.4294  | 0.602856 | -1.04345 | 0.309926 | 0.433661 | -5.90718 |
| CLEC12A   | -0.7203  | 0.375995 | -1.04342 | 0.309942 | 0.433661 | -5.90721 |
| ABCA6     | -0.39572 | 0.135439 | -1.09167 | 0.288044 | 0.41002  | -5.90748 |
| ARG2      | -0.50817 | 0.570576 | -1.0916  | 0.288072 | 0.41003  | -5.90755 |
| ASIP      | -0.22263 | 0.091983 | -1.09114 | 0.288271 | 0.410284 | -5.90804 |
| KIAA1324L | -0.44342 | 0.006287 | -0.90338 | 0.379046 | 0.50476  | -5.90874 |
| ST8SIA1   | 0.383722 | -0.31031 | 1.080326 | 0.293615 | 0.416198 | -5.90907 |
| MRPL48    | -0.30511 | 0.148371 | -1.08974 | 0.288873 | 0.41107  | -5.90952 |
| RBP4      | -0.32655 | 0.234809 | -1.08966 | 0.288905 | 0.41107  | -5.9096  |
| PGRMC1    | -0.4133  | 0.319038 | -1.08956 | 0.288949 | 0.41107  | -5.9097  |
| PGR       | 0.245338 | -0.06342 | 1.089559 | 0.288949 | 0.41107  | -5.90971 |
| MGAT5B    | 0.313305 | 0.147585 | 1.040689 | 0.311175 | 0.434983 | -5.90997 |
| DAPK3     | 0.227667 | -0.04905 | 1.089266 | 0.289075 | 0.411184 | -5.91001 |
| RPL39     | 0.777362 | -1.4063  | 1.089236 | 0.289088 | 0.411184 | -5.91005 |
| LOC49725  | -0.34694 | 0.134289 | -1.08923 | 0.289092 | 0.411184 | -5.91006 |
| INPP4B    | 0.472055 | -0.39592 | 1.031071 | 0.316265 | 0.440809 | -5.91011 |
| SGCD      | -0.1915  | -0.01503 | -1.07918 | 0.294115 | 0.416664 | -5.91027 |
| ANGPTL1   | -0.26851 | 0.086858 | -1.07892 | 0.294225 | 0.416761 | -5.91053 |
| FAH       | 0.227154 | 0.057132 | 1.088634 | 0.289347 | 0.411427 | -5.91068 |
| VWC2L     | 0.21323  | 0.004099 | 1.078698 | 0.294322 | 0.416868 | -5.91077 |
| NSUN2     | -0.20823 | 0.080793 | -1.08829 | 0.289494 | 0.411577 | -5.91104 |
| FGF12     | 0.260248 | -0.26702 | 0.969372 | 0.346057 | 0.471599 | -5.91169 |
| OR2A14    | 0.253591 | -0.20158 | 1.087584 | 0.289799 | 0.41198  | -5.91179 |
| PLA1A     | -0.20562 | 0.012178 | -1.08742 | 0.289871 | 0.412052 | -5.91196 |
| OIT3      | 0.091882 | -0.01934 | 1.07688  | 0.295113 | 0.417777 | -5.91266 |
| CCDC75    | -0.28589 | 0.445509 | -1.08645 | 0.290287 | 0.412584 | -5.91298 |
| KIR2DL4   | 0.306537 | 0.352517 | 1.086142 | 0.290421 | 0.412697 | -5.9133  |
| ZBTB34    | -0.32704 | 0.035595 | -1.08612 | 0.290431 | 0.412697 | -5.91333 |
| SLC44A4   | 0.093464 | -0.00329 | 1.086074 | 0.29045  | 0.412697 | -5.91338 |
| CYP4F3    | 0.414397 | 0.004468 | 1.037075 | 0.312812 | 0.436836 | -5.91361 |
| NOX5      | 0.06295  | -0.56162 | 0.103311 | 0.919598 | 0.954477 | -5.91373 |
| PARVB     | 0.396823 | 0.222136 | 1.085483 | 0.290705 | 0.412969 | -5.914   |
| OR2C1     | -0.20392 | -0.08938 | -1.08534 | 0.290768 | 0.413019 | -5.91415 |
| TOMM7     | 0.532366 | -1.18974 | 1.085303 | 0.290783 | 0.413019 | -5.91419 |
| BCAR3     | -0.27013 | 0.282087 | -1.08476 | 0.291016 | 0.413269 | -5.91475 |
| EMG1      | -0.32135 | -0.08069 | -1.08475 | 0.291022 | 0.413269 | -5.91477 |
| MCC       | 0.311032 | 0.122169 | 1.084308 | 0.291213 | 0.413451 | -5.91523 |
| ZNF121    | 0.246197 | 0.031755 | 1.084219 | 0.291252 | 0.413475 | -5.91532 |
| TECTA     | -0.2257  | 0.223498 | -1.08405 | 0.291326 | 0.413551 | -5.91551 |
| INHBB     | 0.43963  | 0.355573 | 1.074115 | 0.296318 | 0.418877 | -5.91554 |
| ALX1      | 0.391076 | -0.26597 | 1.025186 | 0.318957 | 0.443458 | -5.91599 |

|           |          |          |          |          |          |          |
|-----------|----------|----------|----------|----------|----------|----------|
| ZNF778    | -0.35045 | 0.310491 | -1.08316 | 0.29171  | 0.414066 | -5.91644 |
| BTNL3     | 0.787897 | 0.339121 | 0.828577 | 0.423698 | 0.548632 | -5.9166  |
| ZC3HAV1L  | 0.237382 | -0.2473  | 1.082979 | 0.291788 | 0.414147 | -5.91663 |
| FLJ43489  | 0.453895 | -0.21317 | 1.082578 | 0.291962 | 0.414364 | -5.91705 |
| AHI1      | -0.25504 | 0.016202 | -1.08229 | 0.292088 | 0.414482 | -5.91735 |
| TSHZ1     | 0.273678 | 0.010381 | 1.082089 | 0.292174 | 0.414565 | -5.91756 |
| SPATA5    | 0.201498 | -0.07442 | 1.082056 | 0.292188 | 0.414565 | -5.91759 |
| RAB11FIP4 | -0.31495 | 0.59644  | -1.08197 | 0.292225 | 0.414586 | -5.91768 |
| ZNHIT6    | 0.349378 | -0.18645 | 1.081846 | 0.29228  | 0.414634 | -5.91781 |
| PAAF1     | 0.235612 | 0.037046 | 1.081404 | 0.292471 | 0.414876 | -5.91828 |
| TCEA3     | 0.450676 | 0.027141 | 1.081008 | 0.292643 | 0.415089 | -5.91869 |
| CPOX      | -0.24968 | 0.020637 | -1.08088 | 0.292698 | 0.415137 | -5.91882 |
| METTL20   | -0.21996 | 0.018199 | -1.01104 | 0.326282 | 0.450781 | -5.91889 |
| GPR18     | 0.470051 | -0.35594 | 1.080591 | 0.292824 | 0.415226 | -5.91913 |
| HHIPL1    | 0.136026 | -0.11098 | 1.080233 | 0.29298  | 0.415417 | -5.9195  |
| C9orf102  | -0.22219 | -0.03202 | -1.07999 | 0.293085 | 0.415536 | -5.91976 |
| GOLGA6L1  | 0.238041 | -0.53265 | 0.979642 | 0.344048 | 0.469514 | -5.92029 |
| RPL29P2   | 0.322021 | -0.16411 | 1.079384 | 0.293349 | 0.41588  | -5.92039 |
| MGC57346  | -0.35112 | 0.169099 | -1.07923 | 0.293417 | 0.415946 | -5.92056 |
| PRODH     | 0.159521 | -0.17615 | 1.078708 | 0.293642 | 0.416198 | -5.9211  |
| ASMTL-AS1 | -0.23409 | 0.302531 | -1.07867 | 0.293658 | 0.416198 | -5.92114 |
| SLC35F4   | -0.264   | -0.25387 | -1.02954 | 0.316245 | 0.440809 | -5.92117 |
| LOC100506 | -0.33852 | 0.136972 | -1.01996 | 0.321362 | 0.445883 | -5.92118 |
| LOXL3     | -0.20806 | 0.003445 | -1.07831 | 0.293817 | 0.416383 | -5.92152 |
| ADCY9     | 0.263048 | 0.148572 | 1.078274 | 0.293831 | 0.416383 | -5.92155 |
| DUSP23    | 0.245728 | -0.14632 | 1.078198 | 0.293865 | 0.4164   | -5.92163 |
| S100A2    | 0.225427 | -0.14739 | 1.078089 | 0.293912 | 0.416437 | -5.92175 |
| DSC3      | 0.094219 | -0.02094 | 1.05643  | 0.304849 | 0.428199 | -5.92178 |
| MYCBP2    | 0.269276 | -0.16525 | 1.077668 | 0.294095 | 0.416664 | -5.92219 |
| UCP3      | -0.16159 | 0.368989 | -1.07744 | 0.294195 | 0.416748 | -5.92243 |
| ZNF718    | -0.391   | 0.058411 | -1.06703 | 0.299423 | 0.422261 | -5.92289 |
| RSPO1     | 0.456295 | -0.61016 | 1.018176 | 0.322186 | 0.446963 | -5.92295 |
| C1orf112  | -0.18237 | 0.074737 | -1.06679 | 0.299529 | 0.42235  | -5.92314 |
| LRRC4B    | 0.252062 | -0.1408  | 1.07626  | 0.294709 | 0.417355 | -5.92365 |
| RASD1     | -0.42344 | 0.209234 | -1.07621 | 0.294733 | 0.417359 | -5.92371 |
| TICAM1    | -0.20934 | 0.311924 | -1.07614 | 0.294761 | 0.417369 | -5.92378 |
| MEIS2     | 0.088455 | -0.01862 | 1.065684 | 0.300016 | 0.422824 | -5.92429 |
| OTOGL     | -0.28468 | 0.140676 | -1.07547 | 0.295053 | 0.417722 | -5.92448 |
| ZNF510    | -0.33981 | 0.244829 | -1.07526 | 0.295147 | 0.417795 | -5.9247  |
| POLR3H    | -0.26544 | 0.250196 | -1.07513 | 0.295204 | 0.417845 | -5.92484 |
| NAPSB     | 0.560954 | -0.0976  | 1.075077 | 0.295225 | 0.417845 | -5.92489 |
| OSCP1     | -0.2785  | -0.07071 | -1.07484 | 0.295327 | 0.417958 | -5.92513 |
| DNAAF2    | -0.35181 | -0.11028 | -1.0745  | 0.295479 | 0.418143 | -5.92549 |
| C1orf186  | 0.194652 | -0.0093  | 1.074263 | 0.295581 | 0.418197 | -5.92574 |
| DIP2C     | -0.38679 | 0.23937  | -1.00403 | 0.329553 | 0.454165 | -5.92576 |
| THAP4     | 0.218976 | 0.116113 | 1.073933 | 0.295725 | 0.418341 | -5.92608 |
| KCNG4     | 0.301471 | -0.45513 | 1.003389 | 0.329853 | 0.454447 | -5.92638 |

|           |          |          |          |          |          |          |
|-----------|----------|----------|----------|----------|----------|----------|
| LMBRD1    | -0.31766 | -0.33688 | -1.07362 | 0.295862 | 0.418474 | -5.92641 |
| C3orf20   | -0.1802  | -0.05779 | -1.07348 | 0.295921 | 0.418528 | -5.92655 |
| DHX34     | -0.4139  | 0.597624 | -1.07307 | 0.296102 | 0.418753 | -5.92698 |
| OSTC      | -0.2591  | -0.24121 | -1.07297 | 0.296146 | 0.418772 | -5.92708 |
| NANOG     | -0.2962  | -0.37941 | -0.89328 | 0.388112 | 0.514072 | -5.92709 |
| STX16     | -0.52407 | 0.341687 | -1.07294 | 0.296159 | 0.418772 | -5.92711 |
| TXLNA     | -0.41539 | 0.771928 | -1.07285 | 0.2962   | 0.418801 | -5.92721 |
| ATP1A3    | 0.205576 | -0.08245 | 1.072637 | 0.296292 | 0.418877 | -5.92743 |
| TMEM117   | 0.202785 | -0.44026 | 1.072598 | 0.296309 | 0.418877 | -5.92747 |
| SEC11A    | -0.17915 | -0.03215 | -1.07248 | 0.296363 | 0.41891  | -5.9276  |
| UBXN1     | 0.19341  | 0.005847 | 1.072354 | 0.296416 | 0.418956 | -5.92772 |
| SYT7      | 0.186343 | -0.17763 | 1.072237 | 0.296468 | 0.418998 | -5.92785 |
| TRIM8     | -0.28659 | 0.389556 | -1.07193 | 0.296601 | 0.419156 | -5.92816 |
| IL12A     | -0.35556 | 0.117891 | -1.07184 | 0.29664  | 0.419181 | -5.92825 |
| LOC440104 | 0.243636 | 0.097145 | 1.071781 | 0.296667 | 0.419189 | -5.92832 |
| MLXIPL    | 0.226009 | -0.10997 | 1.071507 | 0.296788 | 0.419329 | -5.9286  |
| CNP       | -0.42926 | 0.612818 | -1.07143 | 0.296823 | 0.419349 | -5.92869 |
| ZNF580    | -0.204   | 0.330614 | -1.07127 | 0.296891 | 0.419415 | -5.92885 |
| LOC100131 | -0.43202 | 0.355373 | -1.07122 | 0.296913 | 0.419416 | -5.9289  |
| WNT7B     | 0.314111 | -0.70964 | 1.049339 | 0.308011 | 0.431731 | -5.92902 |
| ARSA      | -0.30043 | 0.147076 | -1.07098 | 0.297021 | 0.419537 | -5.92916 |
| ZNF295-AS | 0.208772 | -0.08001 | 1.06087  | 0.302143 | 0.42527  | -5.92925 |
| ARMCX3    | 0.504081 | 0.233786 | 1.070742 | 0.297123 | 0.419652 | -5.9294  |
| TAT       | 0.227301 | -0.1738  | 1.070594 | 0.297188 | 0.419713 | -5.92955 |
| LOC100131 | 0.08317  | -0.01663 | 1.070417 | 0.297266 | 0.419763 | -5.92974 |
| SPSB1     | -0.22361 | 0.482009 | -1.07011 | 0.2974   | 0.419922 | -5.93005 |
| LOC729971 | -0.22371 | -0.2054  | -1.02    | 0.32063  | 0.445115 | -5.93067 |
| MRPL55    | 0.203096 | -0.00988 | 1.069279 | 0.297765 | 0.420377 | -5.93092 |
| ALDH3B1   | -0.23085 | 0.187132 | -1.06913 | 0.297832 | 0.42044  | -5.93107 |
| ZBED5     | -0.27918 | -0.35628 | -1.06884 | 0.297957 | 0.420586 | -5.93137 |
| GLB1L     | 0.180794 | -0.41104 | 1.068737 | 0.298004 | 0.420622 | -5.93148 |
| KLHL15    | -0.34537 | -0.27781 | -1.04664 | 0.30922  | 0.432959 | -5.93177 |
| CATSPERB  | -0.3716  | 0.147451 | -1.06823 | 0.298228 | 0.42091  | -5.93201 |
| TSPAN9    | -0.30219 | 0.845519 | -1.06815 | 0.298261 | 0.420925 | -5.93208 |
| NR4A3     | -0.5212  | 0.11193  | -1.05792 | 0.303453 | 0.426746 | -5.93229 |
| C9orf23   | 0.186013 | -0.03011 | 1.067934 | 0.298357 | 0.42103  | -5.93231 |
| ALPP      | 0.148201 | -0.26662 | 1.067729 | 0.298447 | 0.421128 | -5.93252 |
| DCAF6     | 0.331841 | 0.008821 | 1.008446 | 0.326705 | 0.451156 | -5.93253 |
| MAB21L3   | 0.182371 | -0.22668 | 1.067037 | 0.298752 | 0.421527 | -5.93324 |
| AKT3      | -0.25502 | 0.047763 | -1.06666 | 0.298918 | 0.421701 | -5.93363 |
| KLF4      | -0.32623 | 0.581225 | -1.06657 | 0.298958 | 0.421726 | -5.93372 |
| IL7       | 0.145313 | -0.00711 | 1.056217 | 0.304208 | 0.427624 | -5.93403 |
| ZNF107    | 0.415944 | -0.09589 | 1.066164 | 0.299137 | 0.421948 | -5.93414 |
| RPL23A    | 0.389976 | 0.159573 | 1.065998 | 0.29921  | 0.422015 | -5.93432 |
| MRI1      | 0.359864 | 0.169027 | 1.065959 | 0.299227 | 0.422015 | -5.93436 |
| MMP2      | 0.182441 | -0.39593 | 1.065433 | 0.299459 | 0.422281 | -5.9349  |
| MIOX      | 0.202989 | -0.13759 | 1.064897 | 0.299696 | 0.422524 | -5.93545 |

|           |          |          |          |          |          |          |
|-----------|----------|----------|----------|----------|----------|----------|
| C19orf73  | -0.25199 | 0.493693 | -1.06472 | 0.299776 | 0.422593 | -5.93564 |
| EFTUD1    | -0.25261 | 0.407474 | -1.06465 | 0.299807 | 0.422593 | -5.93571 |
| TEPP      | -0.24081 | -0.12852 | -1.06464 | 0.299809 | 0.422593 | -5.93572 |
| VPS26A    | -0.23983 | -0.19312 | -1.05439 | 0.305024 | 0.428341 | -5.9359  |
| ZNF395    | -0.35351 | 0.804607 | -1.06408 | 0.300058 | 0.422852 | -5.9363  |
| GJA1      | 0.344731 | -0.00708 | 1.013721 | 0.323542 | 0.448146 | -5.93688 |
| HOXB7     | 0.194818 | -0.2551  | 1.063508 | 0.300309 | 0.423145 | -5.93689 |
| UQCRH     | -0.3597  | 0.15856  | -1.06345 | 0.300333 | 0.423149 | -5.93694 |
| ADA       | 0.389245 | 0.092551 | 1.063021 | 0.300525 | 0.423388 | -5.93739 |
| CHRNA6    | 0.299057 | -0.07334 | 1.062758 | 0.300641 | 0.423522 | -5.93766 |
| MTMR12    | 0.192855 | -0.24949 | 1.062704 | 0.300665 | 0.423525 | -5.93772 |
| ARL6      | 0.072209 | -0.0152  | 1.052431 | 0.305897 | 0.429351 | -5.9379  |
| ID2       | -0.22494 | 0.216445 | -1.06228 | 0.300851 | 0.423757 | -5.93815 |
| C12orf39  | -0.48083 | 0.307311 | -1.01184 | 0.324415 | 0.449023 | -5.93873 |
| MLANA     | 0.209918 | -0.20025 | 1.061007 | 0.301417 | 0.424514 | -5.93947 |
| LOC282997 | -0.1735  | -0.09148 | -1.06097 | 0.301432 | 0.424514 | -5.9395  |
| SYTL3     | -0.29615 | 0.342374 | -1.06082 | 0.301499 | 0.424561 | -5.93966 |
| MORN1     | -0.22635 | 0.078129 | -1.06065 | 0.301573 | 0.424621 | -5.93983 |
| NUBPL     | 0.3878   | 0.057746 | 1.060453 | 0.301662 | 0.424716 | -5.94004 |
| C18orf23  | -0.3406  | 0.474203 | -1.06032 | 0.301723 | 0.424771 | -5.94018 |
| C7orf55   | -0.08161 | 0.016321 | -1.05962 | 0.30203  | 0.425173 | -5.94089 |
| DSCAML1   | 0.317123 | -0.16275 | 1.049387 | 0.307258 | 0.430799 | -5.94101 |
| DLK1      | -0.45136 | 0.267969 | -1.05944 | 0.30211  | 0.425255 | -5.94108 |
| LY6K      | -0.2631  | 0.08378  | -1.05893 | 0.302337 | 0.425513 | -5.9416  |
| TRIM45    | 0.233716 | -0.13451 | 1.058706 | 0.302438 | 0.425625 | -5.94183 |
| SP5       | -0.27145 | 0.105644 | -1.05863 | 0.302471 | 0.42564  | -5.94191 |
| LELP1     | -0.26167 | -0.01269 | -1.05858 | 0.302495 | 0.425644 | -5.94197 |
| KIAA2018  | -0.2454  | -0.27626 | -1.05844 | 0.302555 | 0.425697 | -5.9421  |
| EDC4      | 0.203206 | -0.0194  | 1.05819  | 0.302667 | 0.425825 | -5.94237 |
| BMP2      | 0.238473 | -0.19289 | 1.008069 | 0.326177 | 0.450713 | -5.94244 |
| SERTAD2   | -0.24444 | 0.053583 | -1.05756 | 0.302948 | 0.42619  | -5.94301 |
| MED21     | -0.36371 | -0.20685 | -0.95573 | 0.354496 | 0.48064  | -5.9431  |
| MCM7      | 0.235944 | 0.048789 | 1.057433 | 0.303004 | 0.426216 | -5.94314 |
| GSTCD     | -0.29549 | 0.289049 | -1.05703 | 0.303183 | 0.426428 | -5.94356 |
| VPS72     | -0.16837 | 0.121702 | -1.05655 | 0.303396 | 0.426697 | -5.94405 |
| LOC541477 | -0.5182  | 0.43443  | -1.05627 | 0.303522 | 0.426813 | -5.94434 |
| EMID2     | 0.245486 | -0.23419 | 1.055813 | 0.303726 | 0.427068 | -5.94481 |
| SLC6A20   | -0.48921 | 0.188902 | -1.05541 | 0.303907 | 0.427293 | -5.94522 |
| RPL13     | 0.342534 | -0.22518 | 1.05512  | 0.304035 | 0.427442 | -5.94552 |
| RBBP8     | 0.446644 | -0.22633 | 1.018687 | 0.322743 | 0.447402 | -5.94565 |
| C11orf21  | -0.20482 | 0.245426 | -1.05486 | 0.304152 | 0.427576 | -5.94579 |
| C3orf27   | 0.176626 | -0.06069 | 1.054667 | 0.304237 | 0.427634 | -5.94598 |
| PARP11    | 0.400399 | -0.07668 | 1.05442  | 0.304347 | 0.427759 | -5.94623 |
| C19orf2   | -0.27504 | 0.144468 | -1.05373 | 0.304657 | 0.428098 | -5.94694 |
| ABHD8     | -0.19205 | 0.419118 | -1.05368 | 0.304676 | 0.428098 | -5.94699 |
| TXNDC5    | 0.350068 | 0.424661 | 1.053583 | 0.304721 | 0.428117 | -5.94709 |
| POMC      | -0.20911 | 0.052446 | -1.05356 | 0.304733 | 0.428117 | -5.94712 |

|           |          |          |          |          |          |          |
|-----------|----------|----------|----------|----------|----------|----------|
| UBE2E2    | -0.31243 | 0.044539 | -1.05342 | 0.304793 | 0.42817  | -5.94726 |
| HES5      | 0.233926 | -0.07994 | 1.053277 | 0.304857 | 0.428199 | -5.9474  |
| C16orf72  | -0.33828 | -0.09684 | -1.05307 | 0.304949 | 0.428297 | -5.94761 |
| TMEM98    | 0.226691 | -0.40574 | 1.052923 | 0.305016 | 0.428341 | -5.94777 |
| UXT       | 0.257864 | -0.1666  | 1.052761 | 0.305089 | 0.428401 | -5.94793 |
| NRG3      | 0.205532 | -0.1461  | 1.052424 | 0.305239 | 0.428551 | -5.94828 |
| CRYM      | -0.31517 | 0.272939 | -1.05224 | 0.305322 | 0.428637 | -5.94847 |
| ADAM23    | 0.499553 | -0.47751 | 1.030039 | 0.316736 | 0.44134  | -5.94852 |
| C17orf48  | -0.27987 | -0.31092 | -1.05151 | 0.305647 | 0.429062 | -5.94921 |
| F2        | 0.19298  | -0.02129 | 1.051371 | 0.305711 | 0.42912  | -5.94935 |
| LOC100506 | 0.317869 | -0.26766 | 0.840724 | 0.417124 | 0.541948 | -5.94991 |
| DOCK4     | -0.19596 | 0.117619 | -1.05079 | 0.30597  | 0.429423 | -5.94994 |
| GALNTL5   | -0.28762 | -0.26925 | -1.05051 | 0.306097 | 0.429571 | -5.95023 |
| CSPG4P1Y  | -0.17091 | -0.16953 | -1.05042 | 0.306135 | 0.429594 | -5.95032 |
| DNAJB4    | 0.185944 | -0.11177 | 1.050079 | 0.30629  | 0.429779 | -5.95067 |
| FAM22D    | 0.177182 | -0.29238 | 1.049909 | 0.306366 | 0.429855 | -5.95085 |
| RBM1Y1E   | -0.4359  | -0.05708 | -1.04981 | 0.306408 | 0.429858 | -5.95094 |
| HSPBP1    | 0.272251 | 0.126154 | 1.049806 | 0.306412 | 0.429858 | -5.95095 |
| BMP7      | 0.552628 | 0.186512 | 1.04947  | 0.306563 | 0.430039 | -5.95129 |
| MARK2     | 0.184463 | 0.137047 | 1.049418 | 0.306586 | 0.430041 | -5.95135 |
| PLOD2     | -0.51237 | 0.790294 | -1.03902 | 0.311929 | 0.435851 | -5.95153 |
| CIDEA     | 0.252578 | -0.36156 | 1.038836 | 0.312013 | 0.435938 | -5.95172 |
| TCF19     | -0.41639 | 0.679719 | -1.04894 | 0.306802 | 0.430314 | -5.95184 |
| B3GALT1   | 0.248873 | 0.007482 | 1.048442 | 0.307024 | 0.430564 | -5.95234 |
| AXDND1    | -0.509   | 0.242619 | -1.04827 | 0.307101 | 0.43064  | -5.95252 |
| OR7A10    | -0.21402 | 0.074216 | -1.04808 | 0.307189 | 0.430732 | -5.95271 |
| SQLE      | -0.37995 | 0.468884 | -1.04672 | 0.307798 | 0.431495 | -5.95409 |
| TREM2     | -0.13787 | 0.115578 | -1.0465  | 0.307897 | 0.431602 | -5.95432 |
| MYO7A     | 0.312847 | -0.09791 | 1.046173 | 0.308045 | 0.431747 | -5.95465 |
| RFPL1-AS1 | 0.311796 | -0.08552 | 1.045884 | 0.308175 | 0.431877 | -5.95495 |
| PDX1      | 0.276009 | -0.20879 | 1.04587  | 0.308181 | 0.431877 | -5.95496 |
| TRIM28    | 0.263774 | 0.153403 | 1.045651 | 0.30828  | 0.431984 | -5.95518 |
| CYP1A2    | 0.498774 | -1.23026 | 1.045399 | 0.308393 | 0.432112 | -5.95544 |
| RBM11     | -0.16124 | 0.042961 | -0.9947  | 0.33247  | 0.457377 | -5.95548 |
| LMAN1     | -0.60903 | 1.233464 | -1.04523 | 0.30847  | 0.432188 | -5.95561 |
| S100A14   | 0.136835 | -0.52259 | 1.045031 | 0.308559 | 0.432283 | -5.95581 |
| ATP5H     | -0.19075 | 0.104671 | -1.04491 | 0.308615 | 0.43233  | -5.95594 |
| LOC100133 | -0.25105 | 0.462947 | -1.04453 | 0.308784 | 0.432537 | -5.95632 |
| CDCP2     | -0.27878 | -0.10176 | -0.98367 | 0.338411 | 0.463759 | -5.95657 |
| PCLO      | 0.2129   | -0.13825 | 1.044204 | 0.308932 | 0.432713 | -5.95665 |
| RBMX      | -0.145   | 0.215127 | -1.04413 | 0.308964 | 0.432727 | -5.95673 |
| TFF3      | -0.23116 | -0.0878  | -1.04404 | 0.309005 | 0.432744 | -5.95682 |
| PPFIBP1   | 0.246901 | -0.23899 | 1.044008 | 0.309021 | 0.432744 | -5.95685 |
| SYBU      | 0.197772 | -0.0975  | 1.043734 | 0.309144 | 0.432886 | -5.95713 |
| HOTAIRM1  | 0.155186 | 0.022668 | 1.043521 | 0.309241 | 0.432959 | -5.95735 |
| DUSP21    | -0.24327 | 0.110785 | -1.04323 | 0.309373 | 0.433072 | -5.95765 |
| TPPP2     | 0.138047 | -0.20225 | 1.043196 | 0.309387 | 0.433072 | -5.95768 |

|           |          |          |          |          |          |          |
|-----------|----------|----------|----------|----------|----------|----------|
| DIRAS3    | -0.1468  | 0.069987 | -1.04289 | 0.309527 | 0.433206 | -5.95799 |
| CARHSP1   | 0.237811 | -0.30982 | 1.042299 | 0.309793 | 0.433546 | -5.95859 |
| ALDH1A3   | 0.107862 | -0.03513 | 1.042249 | 0.309815 | 0.433546 | -5.95864 |
| ICK       | 0.289508 | -0.24068 | 1.041832 | 0.310004 | 0.433709 | -5.95906 |
| ZNF343    | -0.25035 | 0.410056 | -1.0418  | 0.31002  | 0.433709 | -5.9591  |
| LYZL4     | 0.21295  | -0.06001 | 1.03124  | 0.315469 | 0.439925 | -5.95936 |
| AMOTL2    | 0.246699 | -0.38748 | 1.041347 | 0.310223 | 0.433962 | -5.95955 |
| SMCR7L    | 0.175978 | 0.103229 | 1.04102  | 0.310371 | 0.434138 | -5.95988 |
| AGTR1     | -0.1897  | 0.053854 | -1.03065 | 0.31574  | 0.440265 | -5.95996 |
| HNRNPR    | 0.495654 | -0.04567 | 1.040821 | 0.310461 | 0.434234 | -5.96008 |
| RBBP7     | 0.228779 | -0.09955 | 1.040673 | 0.310528 | 0.434286 | -5.96023 |
| RAP1GAP2  | -0.5789  | 0.733787 | -1.04061 | 0.310556 | 0.434286 | -5.96029 |
| EYA2      | 0.397226 | 0.153009 | 1.04055  | 0.310584 | 0.434286 | -5.96036 |
| PLXDC1    | -0.51023 | 0.512394 | -1.04051 | 0.310603 | 0.434286 | -5.9604  |
| DAB2      | 0.365645 | 0.261746 | 1.040493 | 0.31061  | 0.434286 | -5.96042 |
| GRK1      | 0.207893 | -0.30284 | 1.040198 | 0.310744 | 0.434442 | -5.96071 |
| HDX       | -0.33561 | -0.05167 | -0.97929 | 0.340512 | 0.465856 | -5.96076 |
| NIPSNAP1  | -0.34905 | 0.564824 | -1.03976 | 0.310942 | 0.434689 | -5.96116 |
| CTNNA1    | -0.30628 | 0.319599 | -1.03905 | 0.311262 | 0.435074 | -5.96187 |
| LOC100128 | 0.272669 | 0.04549  | 1.028472 | 0.316735 | 0.44134  | -5.96214 |
| LOC401397 | 0.247533 | -0.31031 | 1.038742 | 0.311404 | 0.435241 | -5.96219 |
| STATH     | 0.23099  | -0.15258 | 0.977232 | 0.341503 | 0.466853 | -5.96273 |
| BPIFA4P   | 0.270749 | -0.35558 | 1.027811 | 0.317038 | 0.441541 | -5.9628  |
| RSPO3     | -0.311   | 0.076173 | -1.03809 | 0.311698 | 0.435621 | -5.96284 |
| DBI       | -0.37098 | -0.18922 | -1.03803 | 0.311727 | 0.435631 | -5.96291 |
| P4HA2     | 0.273092 | -0.00409 | 1.037862 | 0.311803 | 0.435706 | -5.96308 |
| SLC2A4    | 0.346899 | -0.13191 | 0.986519 | 0.336363 | 0.461566 | -5.96339 |
| C6orf108  | 0.332953 | -0.08515 | 1.037344 | 0.312039 | 0.435942 | -5.9636  |
| TOMM6     | 0.214617 | -0.19811 | 1.037287 | 0.312064 | 0.435946 | -5.96366 |
| TP53BP1   | -0.21292 | 0.399764 | -1.03623 | 0.312546 | 0.436588 | -5.96473 |
| ZNF729    | 0.313424 | -0.06513 | 1.025797 | 0.317962 | 0.442607 | -5.96481 |
| TRAK1     | -0.13892 | -0.00709 | -1.03614 | 0.312588 | 0.436616 | -5.96482 |
| ARC       | -0.18958 | 0.191498 | -1.03608 | 0.312615 | 0.436623 | -5.96488 |
| C6orf118  | 0.319663 | 4.40E-05 | 1.013537 | 0.324335 | 0.448959 | -5.96493 |
| TMPRSS3   | 0.338553 | 0.108625 | 1.035772 | 0.312754 | 0.436785 | -5.96519 |
| RNF32     | 0.087296 | -0.02002 | 1.013223 | 0.32448  | 0.44904  | -5.96524 |
| BCL7C     | -0.19577 | 0.187947 | -1.03555 | 0.312853 | 0.436861 | -5.96541 |
| UBXN2A    | -0.31791 | 0.27985  | -1.03549 | 0.312884 | 0.436874 | -5.96547 |
| SCARF2    | 0.347016 | 0.019728 | 1.035336 | 0.312952 | 0.436938 | -5.96562 |
| CHCHD4    | -0.17744 | 0.092838 | -1.03493 | 0.313138 | 0.437166 | -5.96604 |
| C3orf17   | 0.222467 | -0.17758 | 1.034368 | 0.313393 | 0.437491 | -5.9666  |
| ULK3      | 0.236885 | -0.02739 | 1.034015 | 0.313554 | 0.437684 | -5.96695 |
| IDH3G     | 0.158436 | 0.037211 | 1.033883 | 0.313614 | 0.437737 | -5.96709 |
| ARHGAP25  | 0.251895 | 0.059819 | 1.033648 | 0.313721 | 0.437855 | -5.96732 |
| LOC100506 | -0.2463  | -0.14696 | -1.01044 | 0.325775 | 0.450263 | -5.96798 |
| CHD2      | -0.21253 | 0.442166 | -1.03284 | 0.314088 | 0.438305 | -5.96813 |
| NEB       | -0.24395 | 0.267377 | -1.03268 | 0.314165 | 0.438381 | -5.9683  |



|           |          |          |          |          |          |          |
|-----------|----------|----------|----------|----------|----------|----------|
| FBXW10    | 0.272178 | -0.35848 | 0.945137 | 0.358762 | 0.484765 | -5.96865 |
| TMOD4     | -0.28855 | 0.540113 | -1.0315  | 0.314704 | 0.439102 | -5.96949 |
| SLC17A1   | 0.266337 | -0.13502 | 1.03137  | 0.314762 | 0.439151 | -5.96961 |
| ZNF560    | 0.081433 | -0.01714 | 1.020912 | 0.320211 | 0.444727 | -5.96968 |
| ZNF500    | -0.18401 | 0.182746 | -1.03119 | 0.314844 | 0.439235 | -5.9698  |
| ZNF75A    | -0.30966 | 0.227652 | -1.03096 | 0.314947 | 0.439348 | -5.97002 |
| NDUFC1    | -0.1794  | 0.04117  | -1.03052 | 0.315152 | 0.439601 | -5.97047 |
| ALDH1B1   | -0.17743 | 0.052549 | -1.03009 | 0.315346 | 0.439841 | -5.9709  |
| LOC100655 | 0.288008 | -0.04977 | 1.030037 | 0.315371 | 0.439845 | -5.97095 |
| DNAH6     | -0.2494  | 0.177245 | -1.02981 | 0.315473 | 0.439925 | -5.97118 |
| LOC339524 | 0.311416 | 0.107742 | 0.97805  | 0.340426 | 0.465804 | -5.97151 |
| SLN       | -0.32996 | -0.00226 | -1.01903 | 0.32108  | 0.445644 | -5.97155 |
| CD86      | 0.247446 | -0.22107 | 1.028391 | 0.316126 | 0.440741 | -5.9726  |
| VASH2     | 0.210133 | -0.39596 | 1.028257 | 0.316187 | 0.440795 | -5.97274 |
| ATN1      | 0.29961  | -0.04665 | 1.027994 | 0.316308 | 0.440838 | -5.973   |
| TMEM206   | -0.26841 | 0.122607 | -1.02769 | 0.316448 | 0.441002 | -5.97331 |
| TNNT3     | 0.298489 | 0.487828 | 1.026938 | 0.316793 | 0.441388 | -5.97406 |
| LOC644246 | 0.588833 | -0.59769 | 1.026793 | 0.316859 | 0.441444 | -5.9742  |
| RPL32P3   | -0.30662 | 0.550277 | -1.02675 | 0.316878 | 0.441444 | -5.97424 |
| CXorf51A  | 0.37281  | -0.74796 | 0.965089 | 0.347384 | 0.47288  | -5.97425 |
| MZT1      | 0.382928 | -0.86882 | 0.964941 | 0.347456 | 0.472945 | -5.97439 |
| EPHA6     | -0.07705 | 0.015411 | -1.02655 | 0.31697  | 0.44154  | -5.97444 |
| ATP5E     | -0.54077 | 0.633342 | -1.02648 | 0.317003 | 0.441541 | -5.97452 |
| FZD8      | 0.094922 | -0.00986 | 1.026435 | 0.317024 | 0.441541 | -5.97456 |
| CCT5      | -0.37361 | 0.632924 | -1.02611 | 0.317173 | 0.441697 | -5.97488 |
| GPR88     | 0.330785 | 0.098084 | 1.015647 | 0.322647 | 0.447394 | -5.9749  |
| WLS       | 0.576067 | 0.464037 | 1.025959 | 0.317243 | 0.441763 | -5.97504 |
| APOBEC1   | -0.1948  | 0.035782 | -1.02555 | 0.317428 | 0.441991 | -5.97544 |
| PSD2      | -0.35066 | -0.24352 | -1.01497 | 0.32296  | 0.44753  | -5.97557 |
| NFE4      | -0.45241 | 0.908644 | -1.02532 | 0.317538 | 0.442112 | -5.97568 |
| LOC730751 | -0.24295 | 0.009932 | -1.02506 | 0.317656 | 0.442245 | -5.97593 |
| TLR2      | -0.37285 | -0.12134 | -1.02477 | 0.317791 | 0.442401 | -5.97623 |
| CDHR3     | 0.362456 | 0.181906 | 1.024327 | 0.317994 | 0.442621 | -5.97667 |
| LOC100507 | 0.190657 | -0.32226 | 1.024219 | 0.318043 | 0.442658 | -5.97677 |
| LOC100273 | -0.39785 | 0.280413 | -1.02415 | 0.318074 | 0.442669 | -5.97684 |
| C5orf64   | -0.29183 | 0.045149 | -1.00124 | 0.330082 | 0.454698 | -5.97701 |
| RPL15     | 0.375916 | -0.47147 | 1.023983 | 0.318152 | 0.442736 | -5.97701 |
| LOC283663 | -0.36949 | 0.6403   | -1.02395 | 0.318167 | 0.442736 | -5.97704 |
| LGI2      | -0.21828 | -0.15099 | -1.02384 | 0.318217 | 0.442774 | -5.97715 |
| TRRAP     | -0.21825 | 0.290258 | -1.0237  | 0.318282 | 0.442802 | -5.97729 |
| HSF2      | 0.303224 | -0.54103 | 1.023605 | 0.318326 | 0.442831 | -5.97739 |
| AP3M2     | 0.308787 | -0.1685  | 1.023165 | 0.318529 | 0.443065 | -5.97783 |
| DAO       | 0.336321 | -0.15753 | 1.023143 | 0.318539 | 0.443065 | -5.97785 |
| MCART3P   | 0.173061 | -0.19846 | 0.960914 | 0.349422 | 0.475093 | -5.97818 |
| TMCO7     | 0.257754 | 0.042573 | 1.022756 | 0.318718 | 0.443282 | -5.97823 |
| MCM4      | -0.41331 | 0.592319 | -1.01208 | 0.324307 | 0.448959 | -5.97843 |
| CNN1      | 0.530758 | 0.400211 | 1.022546 | 0.318815 | 0.443385 | -5.97844 |

|           |          |          |          |          |          |          |
|-----------|----------|----------|----------|----------|----------|----------|
| HRASLS5   | -0.19628 | -0.3499  | -1.02243 | 0.318869 | 0.443421 | -5.97856 |
| LOC100506 | -0.22887 | -0.01291 | -0.97061 | 0.344024 | 0.469514 | -5.97859 |
| EIF4ENIF1 | -0.21246 | 0.254302 | -1.02239 | 0.318885 | 0.443421 | -5.9786  |
| GLYCAM1   | 0.263322 | -0.0498  | 1.022323 | 0.318918 | 0.443434 | -5.97867 |
| ACY1      | 0.248661 | 0.029149 | 1.022091 | 0.319024 | 0.44349  | -5.9789  |
| LOC73009  | 0.338086 | -0.24607 | 1.022088 | 0.319026 | 0.44349  | -5.9789  |
| LOC10013  | -0.29387 | 0.572188 | -1.0217  | 0.319206 | 0.443709 | -5.97929 |
| PIP4K2C   | -0.136   | 0.203742 | -1.02148 | 0.319307 | 0.443819 | -5.97951 |
| ACTA2     | -0.35907 | 0.725936 | -1.0214  | 0.319342 | 0.443835 | -5.97958 |
| KRT26     | 0.337823 | 0.036325 | 1.010685 | 0.324955 | 0.449532 | -5.97981 |
| ARFGEF2   | -0.1552  | 0.042373 | -1.02092 | 0.319564 | 0.444113 | -5.98006 |
| RPN2      | -0.20754 | 0.337163 | -1.02038 | 0.319817 | 0.444432 | -5.9806  |
| LOC100506 | -0.29797 | 0.247952 | -1.00979 | 0.325375 | 0.449954 | -5.98069 |
| DHDDS     | -0.14488 | 0.229354 | -1.02012 | 0.319937 | 0.444542 | -5.98086 |
| CECR7     | -0.29398 | 0.294249 | -1.02011 | 0.319942 | 0.444542 | -5.98087 |
| MMP16     | -0.39123 | 0.307545 | -1.01992 | 0.320027 | 0.44462  | -5.98106 |
| LCN1      | 0.159534 | -0.19728 | 1.01984  | 0.320065 | 0.44462  | -5.98114 |
| ZP2       | -0.20346 | -0.06494 | -1.01983 | 0.320071 | 0.44462  | -5.98115 |
| ONECUT1   | -0.22096 | -0.05337 | -1.01977 | 0.320099 | 0.44462  | -5.98121 |
| UBE2B     | -0.25514 | -0.17558 | -1.01974 | 0.320111 | 0.44462  | -5.98124 |
| UBE2QL1   | 0.25041  | 0.03606  | 1.019246 | 0.320339 | 0.444858 | -5.98173 |
| ZNF492    | -0.22694 | -0.3089  | -1.01922 | 0.320351 | 0.444858 | -5.98175 |
| TNNT1     | 0.396113 | -0.01713 | 1.019078 | 0.320417 | 0.444919 | -5.98189 |
| HPDL      | -0.25325 | 0.337342 | -1.01889 | 0.320506 | 0.445011 | -5.98208 |
| LETM1     | -0.18614 | 0.245239 | -1.01859 | 0.320644 | 0.445115 | -5.98238 |
| LDLRAP1   | 0.348996 | 0.113295 | 1.018578 | 0.320649 | 0.445115 | -5.98239 |
| DDT       | -0.16506 | 0.001248 | -1.01826 | 0.320794 | 0.445285 | -5.9827  |
| HABP2     | -0.17446 | 0.112005 | -0.96625 | 0.346145 | 0.471619 | -5.98272 |
| SCAP      | 0.129482 | -0.04645 | 1.017609 | 0.321098 | 0.445644 | -5.98335 |
| EIF1B     | 0.22379  | 0.192888 | 1.017507 | 0.321146 | 0.445678 | -5.98345 |
| PITPNM2   | -0.40736 | 0.268408 | -1.0172  | 0.321288 | 0.445844 | -5.98376 |
| KRT25     | -0.26181 | -0.38931 | -0.93939 | 0.362544 | 0.488461 | -5.98382 |
| B3GNT9    | -0.23232 | 0.328853 | -1.01709 | 0.321338 | 0.445882 | -5.98387 |
| HDDC2     | -0.2689  | 0.476028 | -1.01644 | 0.321642 | 0.446241 | -5.98452 |
| TBC1D1    | -0.1844  | 0.273842 | -1.01497 | 0.322325 | 0.447125 | -5.98597 |
| RNASE4    | 0.458038 | -0.09249 | 1.014395 | 0.322591 | 0.447394 | -5.98654 |
| VPS4A     | 0.110296 | -0.07787 | 1.014368 | 0.322603 | 0.447394 | -5.98656 |
| ERGIC1    | -0.28891 | 0.394586 | -1.01434 | 0.322615 | 0.447394 | -5.98659 |
| RASGRP1   | -0.24773 | 0.186625 | -1.01433 | 0.322619 | 0.447394 | -5.9866  |
| DCAF12L1  | 0.420161 | 0.122447 | 1.014255 | 0.322656 | 0.447394 | -5.98668 |
| MAT2A     | -0.2355  | 0.026713 | -1.01412 | 0.322718 | 0.447402 | -5.98681 |
| IQSEC3    | -0.18395 | 0.274721 | -1.01412 | 0.322719 | 0.447402 | -5.98681 |
| WAPAL     | -0.25761 | -0.0138  | -1.01403 | 0.322759 | 0.447402 | -5.98689 |
| BARX1     | -0.20987 | -0.11943 | -1.014   | 0.322776 | 0.447402 | -5.98693 |
| LOC100506 | -0.17548 | -0.00736 | -1.01389 | 0.322825 | 0.447438 | -5.98703 |
| MTMR3     | -0.29937 | 0.238532 | -1.01377 | 0.32288  | 0.447473 | -5.98715 |
| EMP1      | -0.35442 | 0.017971 | -1.01374 | 0.322896 | 0.447473 | -5.98718 |

|           |          |          |          |          |          |          |
|-----------|----------|----------|----------|----------|----------|----------|
| ZNF506    | -0.17533 | 0.221065 | -1.01349 | 0.323012 | 0.447571 | -5.98743 |
| MCM3AP-1  | 0.260576 | -0.32971 | 1.013237 | 0.32313  | 0.447702 | -5.98768 |
| ZNF737    | -0.20407 | -0.21473 | -0.92431 | 0.369173 | 0.49482  | -5.98773 |
| LOC84989  | -0.14649 | 0.032844 | -1.01287 | 0.323302 | 0.447891 | -5.98805 |
| MLF1      | -0.18754 | -0.07228 | -1.01285 | 0.323312 | 0.447891 | -5.98807 |
| ERVW-1    | -0.36576 | -0.07514 | -1.01257 | 0.323439 | 0.448036 | -5.98834 |
| LRRC33    | 0.211236 | 0.255399 | 1.011956 | 0.323727 | 0.448371 | -5.98895 |
| PRMT7     | 0.246119 | 0.110191 | 1.011607 | 0.32389  | 0.448565 | -5.98929 |
| BPIFC     | -0.17671 | -0.03441 | -0.94884 | 0.355362 | 0.481499 | -5.98946 |
| MASP1     | 0.188753 | -0.05391 | 1.000781 | 0.329597 | 0.45419  | -5.98953 |
| KLHL22    | -0.28556 | 0.35012  | -1.01137 | 0.324001 | 0.448687 | -5.98953 |
| ANKIB1    | -0.20012 | 0.09407  | -1.01131 | 0.324027 | 0.448692 | -5.98958 |
| ZNF554    | -0.29168 | 0.239131 | -1.01117 | 0.324092 | 0.448749 | -5.98972 |
| DCTPP1    | -0.20635 | 0.024465 | -1.01066 | 0.32433  | 0.448959 | -5.99022 |
| PTCHD2    | 0.139752 | 0.038046 | 1.010457 | 0.324427 | 0.449023 | -5.99043 |
| LOC400456 | 0.379809 | -0.21632 | 1.010332 | 0.324485 | 0.44904  | -5.99055 |
| HSPA2     | -0.36941 | 0.486868 | -0.99963 | 0.330139 | 0.454745 | -5.99065 |
| LRRC27    | -0.18031 | -0.00256 | -1.01015 | 0.324571 | 0.449127 | -5.99073 |
| MYOM1     | -0.18123 | 0.221579 | -1.00993 | 0.324672 | 0.449227 | -5.99094 |
| LOC284837 | 0.307526 | 0.213915 | 1.009896 | 0.324689 | 0.449227 | -5.99098 |
| FFAR3     | 0.30576  | -0.32969 | 1.00953  | 0.32486  | 0.449432 | -5.99134 |
| C7orf63   | 0.255456 | 0.022728 | 0.998635 | 0.330609 | 0.455296 | -5.99162 |
| PPAPDC1B  | -0.2294  | 0.111385 | -1.00902 | 0.3251   | 0.449695 | -5.99185 |
| LOC100506 | -0.08008 | 0.016016 | -1.00898 | 0.325119 | 0.449695 | -5.99189 |
| TPD52     | -0.33271 | 0.491711 | -1.00893 | 0.325142 | 0.449695 | -5.99193 |
| CNGA3     | -0.20768 | 0.090757 | -0.99829 | 0.330773 | 0.455489 | -5.99196 |
| TAF7L     | 0.189864 | -0.10336 | 1.008602 | 0.325294 | 0.449874 | -5.99225 |
| ZCCHC6    | -0.239   | 0.275688 | -1.00798 | 0.325584 | 0.45018  | -5.99287 |
| C10orf62  | 0.169704 | -0.16328 | 0.969839 | 0.345831 | 0.471356 | -5.99303 |
| TFPI2     | -0.55092 | 0.458136 | -1.0078  | 0.32567  | 0.45022  | -5.99305 |
| OR3A3     | 0.16652  | -0.26971 | 1.007781 | 0.325678 | 0.45022  | -5.99306 |
| ARMC7     | 0.183851 | -0.0018  | 1.007757 | 0.325689 | 0.45022  | -5.99309 |
| CXorf36   | -0.25986 | -0.09785 | -1.00772 | 0.325705 | 0.45022  | -5.99312 |
| CTCF      | -0.18005 | 0.227556 | -1.00756 | 0.325782 | 0.450263 | -5.99328 |
| TYRP1     | -0.17884 | 0.099884 | -0.98443 | 0.338047 | 0.463391 | -5.9933  |
| ETV1      | 0.233257 | -0.12292 | 1.007444 | 0.325836 | 0.450306 | -5.99339 |
| ABHD15    | -0.28247 | 0.538588 | -1.00704 | 0.326024 | 0.450533 | -5.99379 |
| TRIM48    | -0.18598 | -0.22023 | -0.95422 | 0.352038 | 0.478008 | -5.99401 |
| SYCP3     | 0.245004 | -0.0254  | 0.996125 | 0.331796 | 0.456609 | -5.99407 |
| HYOU1     | 0.228985 | 0.082685 | 1.00664  | 0.326213 | 0.450731 | -5.99418 |
| S100B     | -0.41632 | 0.172967 | -0.9685  | 0.34648  | 0.471945 | -5.9943  |
| CDC6      | -0.58828 | 1.009346 | -1.00646 | 0.326295 | 0.450781 | -5.99436 |
| C16orf52  | -0.20798 | 0.110587 | -1.00628 | 0.326382 | 0.450847 | -5.99454 |
| LOC100287 | -0.18159 | 0.072937 | -1.00626 | 0.326389 | 0.450847 | -5.99455 |
| DHX35     | -0.20784 | 0.074188 | -1.00599 | 0.326519 | 0.450995 | -5.99483 |
| C18orf1   | -0.14897 | -0.30258 | -1.00576 | 0.326626 | 0.45111  | -5.99505 |
| VIPR2     | 0.328539 | -0.08269 | 1.005626 | 0.326688 | 0.451156 | -5.99518 |

|           |          |          |          |          |          |          |
|-----------|----------|----------|----------|----------|----------|----------|
| MDH2      | -0.21084 | 0.117073 | -1.00538 | 0.326803 | 0.45126  | -5.99542 |
| NRXN1     | 0.270608 | -0.48977 | 0.982134 | 0.339148 | 0.464542 | -5.99551 |
| BOLA1     | 0.205141 | -0.05229 | 1.00521  | 0.326884 | 0.45134  | -5.99559 |
| FKBP11    | 0.309858 | 0.25799  | 1.005141 | 0.326916 | 0.451353 | -5.99566 |
| LRP8      | 0.247571 | 0.11783  | 1.005082 | 0.326944 | 0.451359 | -5.99571 |
| CDC25C    | -0.41677 | 0.666925 | -0.98167 | 0.33937  | 0.464749 | -5.99595 |
| HAUS8     | -0.22824 | 0.311628 | -1.00478 | 0.327086 | 0.451524 | -5.99601 |
| GCC1      | -0.19569 | 0.297201 | -1.00472 | 0.327116 | 0.451533 | -5.99607 |
| USP25     | -0.24084 | 0.098373 | -1.00456 | 0.327189 | 0.451595 | -5.99623 |
| GOLGA6C   | 0.249171 | -0.01104 | 1.004522 | 0.327207 | 0.451595 | -5.99626 |
| TREH      | -0.10425 | 0.026843 | -1.00442 | 0.327256 | 0.451631 | -5.99637 |
| HERC6     | 0.486737 | -0.12291 | 1.003962 | 0.32747  | 0.451895 | -5.99681 |
| THOP1     | 0.221472 | 0.148636 | 1.003807 | 0.327543 | 0.451963 | -5.99696 |
| LOC100128 | 0.126808 | 0.018112 | 0.993105 | 0.333227 | 0.458257 | -5.997   |
| FGF1      | 0.390841 | -0.1419  | 1.003255 | 0.327803 | 0.45229  | -5.99751 |
| SYNJ2     | 0.210453 | -0.06044 | 1.003046 | 0.327901 | 0.452394 | -5.99771 |
| NIPAL2    | 0.166523 | -0.24628 | 1.002941 | 0.32795  | 0.45243  | -5.99781 |
| PDIA3     | -0.21872 | 0.174393 | -1.00226 | 0.328272 | 0.452838 | -5.99848 |
| TFAM      | -0.31516 | -0.01619 | -1.00221 | 0.328292 | 0.452838 | -5.99852 |
| GLS       | 0.216713 | -0.30148 | 1.001995 | 0.328396 | 0.452899 | -5.99874 |
| PTGFRN    | -0.21414 | 0.193763 | -1.00198 | 0.328405 | 0.452899 | -5.99876 |
| LOC100130 | 0.298223 | 0.153565 | 0.991284 | 0.334092 | 0.459157 | -5.99876 |
| ZNF788    | -0.24391 | 0.108792 | -1.00196 | 0.328413 | 0.452899 | -5.99877 |
| CLOCK     | -0.20895 | 0.47936  | -1.00192 | 0.328429 | 0.452899 | -5.99881 |
| SLC10A2   | -0.2141  | -0.16252 | -0.93865 | 0.360426 | 0.486478 | -5.99888 |
| TCEAL5    | -0.25581 | 0.032966 | -0.99074 | 0.334352 | 0.459385 | -5.99929 |
| ZNF266    | -0.19015 | 0.017544 | -1.0014  | 0.328676 | 0.453207 | -5.99932 |
| ERV9-1    | 0.375558 | -0.22917 | 0.938157 | 0.360675 | 0.486713 | -5.99934 |
| KIAA0664  | -0.22342 | 0.413669 | -1.00078 | 0.32897  | 0.45358  | -5.99993 |
| RANBP3L   | -0.18514 | 0.097153 | -1.00059 | 0.32906  | 0.453673 | -6.00012 |
| TLR7      | 0.297349 | 0.093307 | 1.000457 | 0.329121 | 0.453725 | -6.00024 |
| AMACR     | -0.35832 | 0.274971 | -1.00022 | 0.329231 | 0.453845 | -6.00047 |
| INTS1     | 0.129613 | -0.20845 | 0.976906 | 0.34166  | 0.467035 | -6.00051 |
| TAF9B     | -0.12461 | 0.027874 | -1.0001  | 0.329289 | 0.453894 | -6.00059 |
| MOCS2     | -0.43095 | 0.522622 | -0.99998 | 0.329345 | 0.453938 | -6.00071 |
| FLJ38668  | -0.17601 | -0.01072 | -0.99954 | 0.329556 | 0.454165 | -6.00114 |
| CTAG1A    | -0.38189 | -0.64255 | -0.52356 | 0.61342  | 0.718893 | -6.00128 |
| MTA2      | 0.184708 | -0.03107 | 0.999335 | 0.329651 | 0.454232 | -6.00134 |
| TRIAP1    | -0.3309  | -0.12117 | -0.99918 | 0.329726 | 0.454303 | -6.00149 |
| C15orf34  | -0.19957 | -0.08274 | -0.9878  | 0.335751 | 0.460823 | -6.00213 |
| POLH      | -0.12796 | -0.024   | -0.99852 | 0.330037 | 0.454669 | -6.00214 |
| GRID2     | 0.126054 | -0.17381 | 0.997994 | 0.330285 | 0.454913 | -6.00265 |
| TRA2B     | -0.21712 | 0.025327 | -0.99656 | 0.330962 | 0.455718 | -6.00404 |
| C17orf87  | -0.25953 | 0.369253 | -0.9965  | 0.330993 | 0.455728 | -6.00411 |
| LOC100128 | 0.170764 | -0.04039 | 0.996421 | 0.331029 | 0.455746 | -6.00418 |
| KCNJ3     | 0.297424 | -0.27379 | 0.996353 | 0.331061 | 0.455759 | -6.00425 |
| LGALS14   | -0.18273 | -0.19594 | -0.98555 | 0.336828 | 0.461977 | -6.00431 |

|           |          |          |          |          |          |          |
|-----------|----------|----------|----------|----------|----------|----------|
| TPM1      | -0.37923 | 0.668604 | -0.99553 | 0.331451 | 0.456263 | -6.00505 |
| ANO4      | 0.344133 | 0.131229 | 0.995275 | 0.331572 | 0.456398 | -6.00529 |
| CTXN2     | -0.20738 | 0.037771 | -0.995   | 0.331703 | 0.456546 | -6.00556 |
| ERCC6     | -0.18083 | 0.163006 | -0.99495 | 0.331728 | 0.456548 | -6.00561 |
| ONECUT2   | 0.196972 | -0.02584 | 0.994726 | 0.331833 | 0.456628 | -6.00583 |
| NOS1AP    | -0.37269 | 0.120188 | -0.98384 | 0.337644 | 0.462934 | -6.00595 |
| SAP130    | 0.190145 | -0.20165 | 0.994249 | 0.332059 | 0.456894 | -6.00629 |
| MAPK8     | -0.21269 | 0.069324 | -0.99422 | 0.332072 | 0.456894 | -6.00632 |
| KCTD4     | -0.31018 | -0.04971 | -0.9934  | 0.332462 | 0.457377 | -6.00712 |
| RSPH3     | -0.22895 | 0.254843 | -0.99315 | 0.332581 | 0.457498 | -6.00736 |
| RPH3AL    | -0.24112 | 0.165239 | -0.99306 | 0.332626 | 0.457527 | -6.00745 |
| LOC100500 | 0.187795 | -0.17322 | 0.992374 | 0.33295  | 0.45794  | -6.00811 |
| FER1L5    | 0.132269 | 0.042165 | 0.981206 | 0.338908 | 0.464278 | -6.00848 |
| VPRBP     | -0.32356 | 0.679606 | -0.99191 | 0.33317  | 0.458211 | -6.00856 |
| ZNF740    | 0.244102 | 0.009515 | 0.927886 | 0.365834 | 0.491506 | -6.00873 |
| AMOTL1    | -0.07261 | 0.014521 | -0.99168 | 0.33328  | 0.458298 | -6.00879 |
| AADACL2   | -0.19394 | -0.02187 | -0.99163 | 0.333305 | 0.4583   | -6.00884 |
| ATP5A1    | 0.184133 | -0.18055 | 0.991385 | 0.333421 | 0.458427 | -6.00907 |
| CD209     | 0.128721 | -0.13042 | 0.991179 | 0.333519 | 0.458529 | -6.00927 |
| ULBP3     | -0.25679 | -0.09351 | -0.96765 | 0.346135 | 0.471619 | -6.00932 |
| C10orf53  | -0.24748 | 0.017151 | -0.99061 | 0.333788 | 0.458842 | -6.00982 |
| AP2B1     | -0.23463 | 0.338848 | -0.9906  | 0.333793 | 0.458842 | -6.00983 |
| HSBP1L1   | -0.35889 | 0.263407 | -0.9905  | 0.333843 | 0.458856 | -6.00993 |
| SCAF8     | -0.20771 | 0.126944 | -0.99048 | 0.33385  | 0.458856 | -6.00995 |
| NEDD1     | 0.212555 | -0.08611 | 0.989903 | 0.334127 | 0.459172 | -6.01051 |
| CNTD2     | 0.118535 | -0.05125 | 0.989554 | 0.334293 | 0.459368 | -6.01085 |
| KIAA1161  | 0.185104 | -0.12399 | 0.978719 | 0.340104 | 0.465461 | -6.01087 |
| EFCAB6    | -0.23441 | 0.196295 | -0.98949 | 0.334322 | 0.459376 | -6.0109  |
| GINS1     | 0.295421 | -0.38479 | 0.989286 | 0.334421 | 0.459448 | -6.0111  |
| MRPL12    | -0.20632 | 0.24956  | -0.98914 | 0.33449  | 0.45951  | -6.01124 |
| ZNF382    | -0.43669 | 0.52558  | -0.98908 | 0.33452  | 0.45952  | -6.01131 |
| ARVCF     | 0.219274 | -0.11301 | 0.988583 | 0.334757 | 0.459812 | -6.01178 |
| CAMSAP2   | -0.4899  | 0.274627 | -0.98852 | 0.334786 | 0.45982  | -6.01184 |
| RASSF4    | -0.31201 | 0.344165 | -0.98843 | 0.334831 | 0.459849 | -6.01193 |
| LOXHD1    | -0.35503 | 0.660837 | -0.98836 | 0.334862 | 0.45986  | -6.012   |
| DVL1      | 0.152008 | 0.07336  | 0.988175 | 0.334951 | 0.459951 | -6.01218 |
| LGI4      | -0.17456 | 0.187414 | -0.98799 | 0.33504  | 0.46004  | -6.01236 |
| SIRT1     | -0.2874  | -0.10787 | -0.98761 | 0.335219 | 0.460254 | -6.01272 |
| EFNA4     | -0.16659 | 0.340085 | -0.9873  | 0.33537  | 0.460428 | -6.01303 |
| ATP6V0B   | -0.1915  | 0.029436 | -0.98714 | 0.335445 | 0.4605   | -6.01318 |
| ZNF524    | 0.163749 | -0.07836 | 0.986733 | 0.335641 | 0.460736 | -6.01357 |
| CYP2A13   | 0.203139 | -0.29381 | 0.986567 | 0.33572  | 0.460812 | -6.01373 |
| LOC400651 | 0.184501 | 0.036182 | 0.922261 | 0.368681 | 0.49445  | -6.01384 |
| SNAP29    | 0.145552 | -0.13392 | 0.985972 | 0.336005 | 0.461138 | -6.01431 |
| B2M       | -0.25926 | 0.129543 | -0.98561 | 0.336177 | 0.461343 | -6.01465 |
| SPRR2G    | -0.1153  | -0.2148  | -0.9746  | 0.342092 | 0.467528 | -6.01481 |
| SLCO5A1   | 0.168994 | 0.027474 | 0.984901 | 0.336518 | 0.461745 | -6.01534 |

|           |          |          |          |          |          |          |
|-----------|----------|----------|----------|----------|----------|----------|
| ARRB1     | 0.324664 | 0.369197 | 0.984832 | 0.33655  | 0.461755 | -6.0154  |
| DCK       | -0.34624 | -0.00159 | -0.98479 | 0.336572 | 0.461755 | -6.01545 |
| RAD23A    | 0.390975 | 0.335198 | 0.98473  | 0.3366   | 0.461761 | -6.0155  |
| SUMO2     | -0.21118 | 0.164598 | -0.98465 | 0.336637 | 0.46178  | -6.01558 |
| CASP14L   | -0.28224 | -0.06548 | -0.9308  | 0.363717 | 0.489769 | -6.01565 |
| ARSI      | 0.200974 | -0.10805 | 0.98432  | 0.336796 | 0.461965 | -6.0159  |
| DIO1      | -0.23559 | 0.103523 | -0.98409 | 0.336906 | 0.462042 | -6.01612 |
| MMP9      | -0.41847 | 0.351431 | -0.98402 | 0.33694  | 0.462042 | -6.01619 |
| LGALS7    | 0.208323 | -0.42763 | 0.984008 | 0.336946 | 0.462042 | -6.0162  |
| CLDN23    | 0.391453 | -0.16833 | 0.851992 | 0.406155 | 0.531504 | -6.01642 |
| GNE       | 0.197253 | -0.38466 | 0.983498 | 0.33719  | 0.462345 | -6.01669 |
| TLR3      | 0.236332 | -0.36331 | 0.784513 | 0.446945 | 0.570406 | -6.01726 |
| LHCGR     | -0.23784 | -0.27674 | -0.94394 | 0.358527 | 0.484548 | -6.01731 |
| SERPINA2  | -0.14079 | -0.01703 | -0.98172 | 0.338045 | 0.463391 | -6.0184  |
| AFF3      | -0.34729 | -0.24188 | -0.98171 | 0.338048 | 0.463391 | -6.01841 |
| UPK3A     | 0.174998 | -0.0037  | 0.981553 | 0.338124 | 0.463463 | -6.01856 |
| LOC100130 | 0.126734 | -0.06263 | 0.970607 | 0.344025 | 0.469514 | -6.01861 |
| QPCT      | -0.45573 | 0.490196 | -0.98126 | 0.338266 | 0.463625 | -6.01884 |
| ZNF541    | -0.28007 | 0.258642 | -0.981   | 0.338392 | 0.463759 | -6.01909 |
| LRRTM2    | -0.24326 | -0.14264 | -0.96985 | 0.344393 | 0.469765 | -6.01933 |
| FOXA3     | 0.217831 | -0.10137 | 0.980642 | 0.338563 | 0.463934 | -6.01943 |
| RAB25     | 0.429205 | -0.13205 | 0.915879 | 0.371928 | 0.49758  | -6.0196  |
| LPIN1     | 0.425415 | 0.074114 | 0.980358 | 0.338699 | 0.464064 | -6.01971 |
| RAB31L1   | 0.623438 | -0.44409 | 0.980346 | 0.338705 | 0.464064 | -6.01972 |
| C20orf144 | 0.169875 | -0.35499 | 0.97998  | 0.338881 | 0.464273 | -6.02007 |
| MMP21     | 0.238102 | -0.24957 | 0.940667 | 0.360155 | 0.486211 | -6.02033 |
| ZNF445    | -0.32537 | 0.073365 | -0.97956 | 0.339083 | 0.464485 | -6.02047 |
| LSS       | -0.22697 | 0.331439 | -0.97916 | 0.339276 | 0.464685 | -6.02086 |
| AMBN      | -0.26199 | 0.179416 | -0.97905 | 0.339327 | 0.464721 | -6.02096 |
| PLSCR4    | -0.59148 | 0.31488  | -0.96802 | 0.345281 | 0.470802 | -6.02106 |
| SEMA3A    | 0.183305 | -0.00948 | 0.978807 | 0.339446 | 0.46482  | -6.02119 |
| SLC37A4   | 0.161567 | 0.002915 | 0.978703 | 0.339496 | 0.464856 | -6.02129 |
| C2CD2     | -0.15129 | 0.034894 | -0.97852 | 0.339587 | 0.464947 | -6.02147 |
| WDR46     | 0.205313 | 0.00409  | 0.978328 | 0.339677 | 0.465038 | -6.02165 |
| SNX16     | -0.41762 | -0.04202 | -0.97818 | 0.339749 | 0.465105 | -6.02179 |
| GPC3      | -0.41065 | 0.596747 | -0.97768 | 0.339988 | 0.4654   | -6.02227 |
| CMTM8     | -0.28066 | 0.287224 | -0.97754 | 0.340056 | 0.465429 | -6.0224  |
| AFF1      | -0.44968 | 0.424028 | -0.97754 | 0.340057 | 0.465429 | -6.02241 |
| FADS2     | -0.16262 | 0.039833 | -0.9771  | 0.340268 | 0.465653 | -6.02282 |
| SLIT2     | 0.252477 | -0.58631 | 0.65865  | 0.523833 | 0.640778 | -6.02294 |
| ZNF540    | 0.273771 | -0.13552 | 0.817408 | 0.426603 | 0.551413 | -6.02295 |
| SLBP      | -0.18851 | 0.073533 | -0.97693 | 0.34035  | 0.465732 | -6.02299 |
| FDXACB1   | -0.42337 | 0.558166 | -0.97654 | 0.340539 | 0.465861 | -6.02336 |
| CRMP1     | 0.21197  | -0.02744 | 0.976307 | 0.340653 | 0.46597  | -6.02359 |
| GDF11     | 0.360073 | 0.150644 | 0.976279 | 0.340666 | 0.46597  | -6.02361 |
| C10orf128 | -0.25686 | 0.109721 | -0.97619 | 0.340709 | 0.465996 | -6.0237  |
| LOC100180 | 0.128317 | -0.06474 | 0.975696 | 0.340948 | 0.466273 | -6.02417 |

|           |          |          |          |          |          |          |
|-----------|----------|----------|----------|----------|----------|----------|
| SH3TC2    | 0.451557 | 0.386632 | 0.975672 | 0.34096  | 0.466273 | -6.02419 |
| IMP5      | -0.26519 | 0.072106 | -0.97555 | 0.341019 | 0.466322 | -6.02431 |
| LOC100281 | 0.232596 | -0.64132 | 0.685604 | 0.506138 | 0.625402 | -6.02437 |
| PMCH      | -0.20037 | -0.17335 | -0.92111 | 0.368622 | 0.494407 | -6.02445 |
| AFAP1L1   | -0.35113 | 0.291496 | -0.9753  | 0.341139 | 0.466454 | -6.02455 |
| SGPP2     | 0.237728 | 0.054068 | 0.975067 | 0.341252 | 0.466576 | -6.02477 |
| NKRF      | 0.237443 | -0.31766 | 0.974551 | 0.341502 | 0.466853 | -6.02526 |
| ADCK5     | -0.19078 | 0.284424 | -0.9741  | 0.34172  | 0.467084 | -6.02569 |
| C1orf105  | 0.195861 | -0.04894 | 0.973808 | 0.341861 | 0.467246 | -6.02597 |
| DEFB127   | 0.394834 | -0.72897 | 0.64796  | 0.531801 | 0.647614 | -6.02599 |
| MBL1P     | 0.183421 | -0.10837 | 0.89596  | 0.382885 | 0.508626 | -6.02621 |
| PPM1E     | 0.231692 | 0.079891 | 0.973238 | 0.342138 | 0.467551 | -6.02651 |
| PANX2     | -0.28426 | 0.53338  | -0.9732  | 0.342156 | 0.467551 | -6.02655 |
| NEUROD6   | -0.24666 | 0.17594  | -0.908   | 0.375962 | 0.501471 | -6.02666 |
| ASNA1     | -0.09607 | 0.192937 | -0.97304 | 0.342236 | 0.467627 | -6.02671 |
| CHRNA5    | 0.157086 | -0.1441  | 0.961485 | 0.348471 | 0.474019 | -6.02724 |
| ZFAND4    | -0.21376 | 0.052746 | -0.97241 | 0.342539 | 0.468009 | -6.0273  |
| SYNM      | 0.356524 | 0.004998 | 0.972328 | 0.342579 | 0.46803  | -6.02738 |
| SEMA4D    | -0.28039 | 0.403672 | -0.97218 | 0.342649 | 0.468093 | -6.02752 |
| SLC25A27  | 0.236016 | -0.38328 | 0.948065 | 0.355745 | 0.481805 | -6.02771 |
| LOC100128 | 0.264506 | -0.65603 | 0.770977 | 0.454648 | 0.57732  | -6.02774 |
| CORO2B    | 0.409935 | -0.05426 | 0.97182  | 0.342825 | 0.468302 | -6.02787 |
| C10orf118 | -0.41621 | 0.440531 | -0.91725 | 0.370592 | 0.496301 | -6.02794 |
| DPM3      | 0.125192 | -0.20474 | 0.971672 | 0.342897 | 0.468367 | -6.02801 |
| KIAA1755  | 0.139784 | -0.12146 | 0.947271 | 0.356139 | 0.482186 | -6.02845 |
| PRKAG3    | -0.36415 | 0.357273 | -0.9601  | 0.349148 | 0.47482  | -6.02854 |
| BATF3     | -0.2519  | 0.138301 | -0.9711  | 0.343174 | 0.46869  | -6.02855 |
| RARA      | -0.23838 | 0.42106  | -0.97109 | 0.343181 | 0.46869  | -6.02856 |
| C1QTNF1   | -0.15013 | 0.144385 | -0.97099 | 0.343228 | 0.468721 | -6.02865 |
| KIF6      | -0.17148 | 0.064675 | -0.97091 | 0.34327  | 0.468731 | -6.02874 |
| USP44     | 0.252178 | -0.37339 | 0.970877 | 0.343283 | 0.468731 | -6.02876 |
| RNF214    | 0.272641 | -0.06901 | 0.915994 | 0.371231 | 0.496987 | -6.02907 |
| CEP72     | -0.27186 | 0.197785 | -0.97007 | 0.343673 | 0.469219 | -6.02953 |
| ZNF323    | -0.29941 | 0.153604 | -0.97004 | 0.343688 | 0.469219 | -6.02955 |
| SFMBT2    | 0.189928 | -0.24923 | 0.95897  | 0.349704 | 0.475378 | -6.02961 |
| APEX1     | -0.28456 | 0.350654 | -0.96977 | 0.343824 | 0.469371 | -6.02982 |
| CDK17     | -0.3902  | 0.142265 | -0.91488 | 0.3718   | 0.49751  | -6.03007 |
| ATIC      | 0.31669  | -0.01703 | 0.969484 | 0.343961 | 0.469514 | -6.03009 |
| PDDC1     | -0.18446 | 0.325787 | -0.96931 | 0.344043 | 0.469514 | -6.03025 |
| VAV3      | -0.28835 | 0.024066 | -0.96919 | 0.344102 | 0.469544 | -6.03036 |
| BEND5     | -0.41546 | 0.707144 | -0.96916 | 0.344118 | 0.469544 | -6.03039 |
| ASTN1     | -0.21969 | 0.088562 | -0.96902 | 0.344184 | 0.469601 | -6.03052 |
| CLTC      | -0.28799 | -0.18406 | -0.96894 | 0.344228 | 0.469628 | -6.03061 |
| FAM162B   | -0.29171 | 0.252455 | -0.96876 | 0.344313 | 0.469711 | -6.03077 |
| SCN7A     | -0.11111 | 0.042031 | -0.96858 | 0.3444   | 0.469765 | -6.03094 |
| RPL24     | 0.438856 | -0.1377  | 0.968335 | 0.34452  | 0.469896 | -6.03118 |
| CD276     | -0.17344 | 0.010138 | -0.96753 | 0.34491  | 0.470396 | -6.03194 |

|           |          |          |          |          |          |          |
|-----------|----------|----------|----------|----------|----------|----------|
| RPS6KA2   | 0.218068 | -0.19077 | 0.967198 | 0.345074 | 0.470586 | -6.03226 |
| PDE1A     | 0.354682 | 0.028332 | 0.966902 | 0.345218 | 0.47075  | -6.03254 |
| RET       | -0.29449 | 0.385197 | -0.9666  | 0.345363 | 0.470882 | -6.03282 |
| TMEM17    | 0.246834 | -0.33083 | 0.926966 | 0.36702  | 0.49273  | -6.0329  |
| SOCS7     | 0.18424  | -0.17594 | 0.966235 | 0.345543 | 0.471095 | -6.03317 |
| GALR2     | 0.182726 | -0.02017 | 0.966128 | 0.345596 | 0.471108 | -6.03327 |
| C16orf88  | -0.30131 | 0.438969 | -0.96612 | 0.345601 | 0.471108 | -6.03328 |
| POM121L1  | -0.1644  | -0.20076 | -0.94175 | 0.358881 | 0.484893 | -6.03356 |
| HLA-A     | -0.28468 | 0.271808 | -0.96581 | 0.34575  | 0.471278 | -6.03357 |
| PRDM9     | -0.31219 | 0.041353 | -0.96527 | 0.346016 | 0.471576 | -6.03408 |
| PRNP      | -0.1802  | -0.11226 | -0.96507 | 0.346111 | 0.471619 | -6.03427 |
| PTK6      | -0.22455 | 0.251267 | -0.96495 | 0.346171 | 0.471623 | -6.03439 |
| CACNG2    | 0.138509 | -0.15248 | 0.940769 | 0.359371 | 0.485455 | -6.03447 |
| PDCD2     | -0.31446 | 0.24136  | -0.96477 | 0.346261 | 0.471712 | -6.03456 |
| PDE9A     | 0.5299   | 0.025807 | 0.964466 | 0.346407 | 0.471879 | -6.03484 |
| C6orf112  | 0.361032 | -0.24085 | 0.940164 | 0.359673 | 0.485795 | -6.03503 |
| HELQ      | 0.28309  | 0.054247 | 0.964102 | 0.346586 | 0.472056 | -6.03519 |
| HESX1     | 0.299221 | -0.20981 | 0.939909 | 0.3598   | 0.48585  | -6.03526 |
| WHSC2     | -0.20473 | 0.087952 | -0.96388 | 0.346696 | 0.472174 | -6.0354  |
| MYOM3     | -0.21973 | -0.18037 | -0.96349 | 0.346884 | 0.472397 | -6.03576 |
| BSN       | 0.193035 | -0.10857 | 0.963346 | 0.346955 | 0.472461 | -6.0359  |
| DDHD1     | -0.35506 | 0.226164 | -0.9632  | 0.347025 | 0.472524 | -6.03604 |
| TNFSF15   | -0.46547 | 0.265791 | -0.96287 | 0.347186 | 0.472709 | -6.03635 |
| CARD9     | -0.2956  | 0.510061 | -0.96261 | 0.347315 | 0.472852 | -6.03659 |
| DMXL2     | -0.22278 | 0.10789  | -0.96247 | 0.347383 | 0.47288  | -6.03673 |
| WDR90     | -0.18809 | 0.279684 | -0.96199 | 0.347618 | 0.473134 | -6.03718 |
| METAP2    | -0.34648 | -0.13194 | -0.96169 | 0.347765 | 0.473301 | -6.03746 |
| SNTA1     | -0.25337 | 0.302645 | -0.96137 | 0.347923 | 0.473483 | -6.03776 |
| CLEC2D    | 0.26444  | -0.15894 | 0.961188 | 0.348012 | 0.473571 | -6.03794 |
| SLC14A2   | -0.13125 | -0.03674 | -0.9611  | 0.348054 | 0.473595 | -6.03802 |
| LOC349160 | -0.08824 | 0.017648 | -0.96092 | 0.348143 | 0.473684 | -6.03819 |
| IL1RL2    | 0.316792 | -0.13033 | 0.905777 | 0.376478 | 0.502056 | -6.03822 |
| RAPGEF5   | 0.161614 | 0.038332 | 0.949255 | 0.354494 | 0.48064  | -6.0387  |
| GRSF1     | -0.16589 | -0.09797 | -0.96032 | 0.348436 | 0.474019 | -6.03875 |
| DEFB114   | 0.348455 | 0.035927 | 0.960261 | 0.348467 | 0.474019 | -6.03881 |
| LRRC3B    | 0.178753 | 0.003697 | 0.960221 | 0.348486 | 0.474019 | -6.03885 |
| LOC339260 | 0.164543 | 0.028814 | 0.959529 | 0.348826 | 0.474448 | -6.0395  |
| RC3H2     | -0.23838 | 0.236301 | -0.95943 | 0.348875 | 0.474482 | -6.03959 |
| XIAP      | -0.27584 | 0.146773 | -0.89336 | 0.38354  | 0.509186 | -6.03963 |
| PCGF6     | 0.409794 | -0.44722 | 0.823135 | 0.424363 | 0.549089 | -6.03998 |
| C11orf61  | -0.25925 | 0.302694 | -0.95881 | 0.349179 | 0.474829 | -6.04017 |
| KLK15     | 0.135703 | -0.05604 | 0.958318 | 0.349422 | 0.475093 | -6.04064 |
| IRX5      | -0.25439 | -0.13    | -0.9582  | 0.34948  | 0.47514  | -6.04075 |
| POLR3G    | -0.24184 | -0.02894 | -0.95809 | 0.349534 | 0.475181 | -6.04085 |
| RPSA      | -0.18756 | -0.04755 | -0.95759 | 0.34978  | 0.475449 | -6.04132 |
| RASGEF1C  | 0.204473 | -0.40291 | 0.957512 | 0.349818 | 0.475467 | -6.04139 |
| LOC100500 | -0.24008 | 0.178557 | -0.95739 | 0.349877 | 0.475514 | -6.04151 |



|           |          |          |          |          |          |          |
|-----------|----------|----------|----------|----------|----------|----------|
| LARGE     | 0.261584 | -0.13231 | 0.957323 | 0.349911 | 0.475528 | -6.04157 |
| GBP4      | -0.55927 | 0.796777 | -0.95697 | 0.350084 | 0.475729 | -6.0419  |
| TSPY26P   | 0.229544 | -0.07779 | 0.820873 | 0.42317  | 0.548169 | -6.04212 |
| PRKCQ     | 0.40524  | 0.081258 | 0.956525 | 0.350304 | 0.475971 | -6.04232 |
| LINC00483 | 0.15117  | -0.23772 | 0.956512 | 0.35031  | 0.475971 | -6.04233 |
| IL27RA    | 0.253407 | 0.313288 | 0.956074 | 0.350526 | 0.476232 | -6.04274 |
| KLF10     | 0.405147 | 0.000931 | 0.93169  | 0.363918 | 0.48984  | -6.04282 |
| C7orf43   | 0.185057 | 0.01546  | 0.955511 | 0.350803 | 0.476568 | -6.04327 |
| FASTKD2   | -0.31882 | -0.00145 | -0.95547 | 0.350823 | 0.476568 | -6.04331 |
| SCTR      | 0.176584 | -0.42606 | 0.806842 | 0.431688 | 0.55615  | -6.04335 |
| SCP2      | -0.21712 | -0.18264 | -0.95528 | 0.350917 | 0.476664 | -6.04349 |
| CCDC15    | -0.22685 | -0.23533 | -0.95523 | 0.350945 | 0.476668 | -6.04354 |
| TBL3      | -0.18109 | 0.348724 | -0.95461 | 0.35125  | 0.477049 | -6.04412 |
| MRVI1     | -0.51529 | -0.03891 | -0.95401 | 0.351546 | 0.477418 | -6.04468 |
| FGF5      | 0.454687 | 0.272812 | 0.953838 | 0.351629 | 0.477498 | -6.04484 |
| WDR67     | -0.28142 | 0.403453 | -0.95298 | 0.352053 | 0.478008 | -6.04564 |
| SRSF8     | 0.230983 | 0.005984 | 0.952315 | 0.352382 | 0.478421 | -6.04626 |
| TTY14     | -0.34884 | -0.30417 | -0.95207 | 0.352505 | 0.478554 | -6.0465  |
| RPL23AP7  | -0.24262 | 0.340102 | -0.95168 | 0.352695 | 0.478747 | -6.04685 |
| SNAP91    | -0.18718 | -0.01687 | -0.88505 | 0.387886 | 0.513827 | -6.04691 |
| FHAD1     | 0.196649 | -0.10244 | 0.951599 | 0.352736 | 0.47875  | -6.04693 |
| KIAA0513  | -0.20431 | 0.143693 | -0.95158 | 0.352746 | 0.47875  | -6.04695 |
| INHA      | 0.221872 | -0.0084  | 0.951428 | 0.352821 | 0.478818 | -6.04709 |
| PCYT2     | -0.18527 | 0.287934 | -0.95126 | 0.352906 | 0.4789   | -6.04725 |
| TRIM4     | -0.31012 | 0.332644 | -0.95076 | 0.353152 | 0.479201 | -6.04772 |
| ZNF420    | 0.34523  | -0.85948 | 0.62018  | 0.547926 | 0.661618 | -6.04784 |
| CEP120    | -0.32853 | -0.12462 | -0.95051 | 0.353275 | 0.479335 | -6.04795 |
| ZNF682    | 0.256779 | 0.154067 | 0.950094 | 0.353482 | 0.479582 | -6.04834 |
| PRR24     | -0.18227 | 0.354598 | -0.9497  | 0.353676 | 0.479812 | -6.0487  |
| DCDC5     | 0.141548 | -0.27474 | 0.893893 | 0.382642 | 0.508407 | -6.04874 |
| ADH4      | 0.235521 | -0.51027 | 0.854463 | 0.405567 | 0.531124 | -6.0489  |
| NAT6      | 0.325553 | -0.2607  | 0.949425 | 0.353813 | 0.479947 | -6.04896 |
| CNTROB    | 0.126238 | -0.01561 | 0.949403 | 0.353824 | 0.479947 | -6.04898 |
| KIAA1279  | -0.2465  | 0.253547 | -0.94935 | 0.353849 | 0.479948 | -6.04903 |
| ADAMTS5   | 0.306712 | -0.84246 | 0.882346 | 0.389308 | 0.515168 | -6.04927 |
| UNC5CL    | -0.18569 | 0.13731  | -0.94892 | 0.354066 | 0.480208 | -6.04943 |
| SLFN11    | 0.193664 | -0.10381 | 0.94867  | 0.354187 | 0.48034  | -6.04966 |
| MPP6      | -0.37994 | 0.40883  | -0.94804 | 0.354503 | 0.48064  | -6.05025 |
| LRFN1     | 0.16866  | -0.13874 | 0.948027 | 0.354507 | 0.48064  | -6.05026 |
| PGM5      | -0.16762 | -0.14197 | -0.94784 | 0.354601 | 0.480734 | -6.05044 |
| CD68      | 0.272187 | -0.14737 | 0.947582 | 0.354728 | 0.480862 | -6.05068 |
| GREM2     | 0.160877 | -0.32372 | 0.947548 | 0.354745 | 0.480862 | -6.05071 |
| THPO      | 0.140063 | -0.02798 | 0.947338 | 0.354849 | 0.48097  | -6.0509  |
| C2orf15   | -0.30542 | -0.22003 | -0.86727 | 0.397965 | 0.523759 | -6.05113 |
| MTNR1B    | 0.214239 | -0.22451 | 0.891099 | 0.3841   | 0.509723 | -6.05119 |
| TGFB111   | 0.351946 | 0.376416 | 0.946882 | 0.355076 | 0.481244 | -6.05133 |
| MAOB      | -0.29652 | 0.517886 | -0.94682 | 0.355107 | 0.481253 | -6.05138 |

|          |          |          |          |          |          |          |
|----------|----------|----------|----------|----------|----------|----------|
| C1orf95  | 0.159387 | -0.1903  | 0.879827 | 0.390635 | 0.516436 | -6.05145 |
| RPL4     | 0.343693 | -0.41158 | 0.946599 | 0.355216 | 0.481369 | -6.05159 |
| ODZ4     | 0.275685 | -0.22868 | 0.946387 | 0.355322 | 0.481478 | -6.05179 |
| CFHR2    | -0.18272 | 0.003608 | -0.94613 | 0.355451 | 0.481587 | -6.05203 |
| LOXL4    | -0.24499 | 0.128514 | -0.94606 | 0.355486 | 0.4816   | -6.05209 |
| PROZ     | 0.428538 | 0.3196   | 0.921322 | 0.369158 | 0.49482  | -6.05226 |
| EVC      | 0.302486 | -0.21046 | 0.945819 | 0.355605 | 0.481728 | -6.05231 |
| HP1BP3   | -0.13219 | 0.114943 | -0.94554 | 0.355741 | 0.481805 | -6.05257 |
| SSR3     | -0.47498 | 0.381765 | -0.94552 | 0.355755 | 0.481805 | -6.0526  |
| DCAF8    | -0.27969 | -0.00867 | -0.94544 | 0.355792 | 0.481805 | -6.05266 |
| OR7E91P  | -0.17356 | -0.23819 | -0.94541 | 0.355806 | 0.481805 | -6.05269 |
| SPTBN5   | -0.22039 | 0.402703 | -0.94541 | 0.355809 | 0.481805 | -6.0527  |
| SVOPL    | 0.293372 | -0.06198 | 0.849901 | 0.408023 | 0.533414 | -6.05274 |
| PLA2G12A | -0.23009 | 0.469291 | -0.94512 | 0.355952 | 0.481965 | -6.05296 |
| TDRD1    | 0.170656 | -0.03283 | 0.944532 | 0.356245 | 0.482296 | -6.05351 |
| KIAA0090 | 0.201359 | -0.18446 | 0.944303 | 0.356359 | 0.482417 | -6.05372 |
| HAB1     | -0.3363  | 0.215181 | -0.94424 | 0.356392 | 0.482427 | -6.05378 |
| DARS2    | -0.35231 | 0.326272 | -0.93286 | 0.36268  | 0.48861  | -6.05385 |
| PTPRN2   | -0.5145  | 0.436997 | -0.94371 | 0.356657 | 0.482753 | -6.05427 |
| ZNF556   | 0.183926 | 0.008516 | 0.918825 | 0.370427 | 0.496147 | -6.05452 |
| CLEC1A   | -0.4163  | 0.298297 | -0.94324 | 0.356887 | 0.483031 | -6.0547  |
| C2CD4B   | -0.30718 | 0.399844 | -0.94305 | 0.356984 | 0.483106 | -6.05488 |
| MYLK     | 0.503535 | 0.259187 | 0.943035 | 0.356992 | 0.483106 | -6.0549  |
| SSBP2    | -0.2182  | 0.555492 | -0.94296 | 0.35703  | 0.483125 | -6.05497 |
| IGFBP2   | 0.259293 | -0.06068 | 0.942753 | 0.357133 | 0.48323  | -6.05516 |
| C1orf65  | -0.1951  | 0.027312 | -0.94265 | 0.357184 | 0.483266 | -6.05525 |
| HCG9     | 0.257188 | 0.247245 | 0.942409 | 0.357304 | 0.483396 | -6.05548 |
| AP2M1    | -0.18514 | 0.461232 | -0.94221 | 0.357404 | 0.483497 | -6.05566 |
| MTA3     | -0.42765 | 0.531792 | -0.94199 | 0.357513 | 0.483611 | -6.05586 |
| TXLNB    | -0.43354 | 0.561063 | -0.94185 | 0.357584 | 0.483674 | -6.056   |
| CNTN1    | 0.13681  | -0.21929 | 0.94148  | 0.357768 | 0.48389  | -6.05634 |
| YIPF3    | -0.15319 | 0.263766 | -0.94124 | 0.357886 | 0.483978 | -6.05655 |
| PAX9     | 0.147176 | -0.28622 | 0.94121  | 0.357903 | 0.483978 | -6.05659 |
| SMTN     | -0.29383 | 0.464501 | -0.9412  | 0.357908 | 0.483978 | -6.05659 |
| PRG3     | -0.61305 | 0.415615 | -0.9411  | 0.35796  | 0.483984 | -6.05669 |
| PSD3     | -0.36131 | 0.050708 | -0.94109 | 0.357961 | 0.483984 | -6.05669 |
| MFAP4    | -0.2174  | 0.325189 | -0.92966 | 0.364292 | 0.490217 | -6.05678 |
| CATSPER2 | 0.219408 | -0.05443 | 0.940977 | 0.35802  | 0.484029 | -6.0568  |
| GABARAP  | -0.19531 | 0.373667 | -0.94078 | 0.35812  | 0.484132 | -6.05699 |
| HIVEP1   | -0.25011 | 0.131917 | -0.94034 | 0.358338 | 0.484392 | -6.05739 |
| CCDC109B | 0.287939 | -0.3195  | 0.940286 | 0.358365 | 0.484396 | -6.05744 |
| RTEL1    | -0.13919 | 0.259274 | -0.94016 | 0.358427 | 0.484446 | -6.05755 |
| PYROXD2  | 0.259327 | -0.00919 | 0.93982  | 0.358598 | 0.484611 | -6.05787 |
| CKAP2    | -0.2455  | -0.01029 | -0.87237 | 0.394582 | 0.520391 | -6.0579  |
| LOC44117 | 0.196367 | -0.16166 | 0.883329 | 0.388177 | 0.514123 | -6.05798 |
| LZTS1    | 0.226169 | -0.04055 | 0.939696 | 0.35866  | 0.484661 | -6.05798 |
| C12orf29 | 0.220004 | -0.52613 | 0.938964 | 0.359027 | 0.485056 | -6.05866 |

|           |          |          |          |          |          |          |
|-----------|----------|----------|----------|----------|----------|----------|
| EDAR      | -0.44344 | 0.252145 | -0.88219 | 0.388777 | 0.514709 | -6.05897 |
| PCGF1     | 0.104146 | -0.03338 | 0.938305 | 0.359357 | 0.485455 | -6.05927 |
| STRA8     | -0.1463  | 0.030799 | -0.92664 | 0.36582  | 0.491506 | -6.05954 |
| JMJD4     | -0.24303 | 0.215313 | -0.93785 | 0.359586 | 0.485711 | -6.05969 |
| ASB10     | 0.189173 | -0.12161 | 0.937579 | 0.359721 | 0.485826 | -6.05994 |
| LINC00165 | 0.158816 | -0.19222 | 0.896735 | 0.382483 | 0.508299 | -6.06004 |
| USP31     | 0.227915 | -0.1184  | 0.937432 | 0.359795 | 0.48585  | -6.06007 |
| DMXL1     | -0.31397 | -0.01059 | -0.9374  | 0.359813 | 0.48585  | -6.0601  |
| TMEM81    | -0.26382 | 0.561002 | -0.93713 | 0.359944 | 0.485994 | -6.06035 |
| HINT1     | -0.45639 | -0.47298 | -0.93699 | 0.360019 | 0.486061 | -6.06048 |
| LOC10013  | -0.1761  | 0.176476 | -0.93656 | 0.360232 | 0.486282 | -6.06087 |
| LOC10012  | -0.21252 | 0.122014 | -0.93638 | 0.360322 | 0.48637  | -6.06104 |
| GAPVD1    | -0.34177 | 0.572126 | -0.93612 | 0.360454 | 0.486482 | -6.06128 |
| ERCC2     | 0.229646 | 0.06865  | 0.93572  | 0.360654 | 0.486713 | -6.06165 |
| NDRG1     | -0.33919 | 0.403904 | -0.93551 | 0.360759 | 0.486793 | -6.06184 |
| ENC1      | 0.256013 | -0.14509 | 0.935344 | 0.360843 | 0.486826 | -6.06199 |
| SLC26A4   | -0.2471  | -0.02433 | -0.93532 | 0.360858 | 0.486826 | -6.06202 |
| TPST1     | -0.56361 | 0.358918 | -0.93531 | 0.360859 | 0.486826 | -6.06202 |
| LOC10050  | -0.15479 | 0.003604 | -0.92345 | 0.367436 | 0.493153 | -6.06244 |
| YAP1      | 0.065991 | -0.0132  | 0.934787 | 0.361123 | 0.487149 | -6.06251 |
| ZNF273    | -0.06598 | 0.013195 | -0.93464 | 0.361196 | 0.487214 | -6.06264 |
| SLAMF6    | -0.33552 | 0.549685 | -0.93439 | 0.361325 | 0.487355 | -6.06287 |
| TSKS      | 0.384493 | 0.276598 | 0.934207 | 0.361415 | 0.487442 | -6.06304 |
| PDRG1     | 0.167221 | -0.14737 | 0.934138 | 0.36145  | 0.487455 | -6.0631  |
| EXTL3     | -0.29123 | 0.397382 | -0.93409 | 0.361474 | 0.487455 | -6.06315 |
| PPP1CC    | -0.26691 | -0.02108 | -0.9337  | 0.36167  | 0.487685 | -6.0635  |
| ABCA4     | 0.29676  | -0.01686 | 0.876947 | 0.391546 | 0.517257 | -6.06352 |
| NEXN      | -0.29659 | 0.313346 | -0.93344 | 0.361802 | 0.487808 | -6.06374 |
| ARPP21    | 0.296183 | -0.09291 | 0.933415 | 0.361813 | 0.487808 | -6.06377 |
| CREB1     | -0.3521  | 0.503515 | -0.93337 | 0.361835 | 0.487808 | -6.06381 |
| LOC79015  | 0.246287 | -0.09481 | 0.933027 | 0.362009 | 0.487984 | -6.06412 |
| TUBD1     | -0.15928 | 0.210595 | -0.93301 | 0.362016 | 0.487984 | -6.06413 |
| GTF2IRD1  | 0.068844 | -0.53488 | 0.172198 | 0.866447 | 0.915952 | -6.06458 |
| PICK1     | -0.26851 | 0.336376 | -0.93242 | 0.362317 | 0.488323 | -6.06468 |
| LMNB2     | 0.21839  | 0.044261 | 0.932351 | 0.362349 | 0.488333 | -6.06474 |
| UFSP2     | 0.179059 | -0.07537 | 0.932025 | 0.362514 | 0.488461 | -6.06504 |
| TF        | 0.242927 | 0.037545 | 0.932022 | 0.362515 | 0.488461 | -6.06504 |
| HAL       | 0.419126 | 0.181633 | 0.931976 | 0.362539 | 0.488461 | -6.06509 |
| GREB1L    | 0.261458 | -0.2481  | 0.920138 | 0.369118 | 0.49482  | -6.06544 |
| FAM174A   | 0.454051 | 0.177147 | 0.91998  | 0.369198 | 0.49482  | -6.06558 |
| PROX2     | 0.304923 | -0.03938 | 0.874486 | 0.392851 | 0.518717 | -6.06565 |
| ZNF813    | 0.296847 | -0.02144 | 0.931242 | 0.362909 | 0.488885 | -6.06576 |
| PCSK9     | 0.218386 | -0.23513 | 0.930602 | 0.363231 | 0.489286 | -6.06634 |
| MLLT6     | -0.14869 | 0.299594 | -0.93004 | 0.363515 | 0.489635 | -6.06686 |
| GLI1      | 0.26208  | 0.01492  | 0.918501 | 0.369951 | 0.495646 | -6.06692 |
| SLC16A4   | -0.15101 | -0.05169 | -0.9299  | 0.363585 | 0.489695 | -6.06698 |
| ZBBX      | -0.30671 | 0.139063 | -0.92978 | 0.363649 | 0.489748 | -6.0671  |

|           |          |          |          |          |          |          |
|-----------|----------|----------|----------|----------|----------|----------|
| PRICKLE1  | -0.31807 | 0.529574 | -0.9297  | 0.363689 | 0.489767 | -6.06717 |
| TXNDC2    | -0.16916 | 0.00958  | -0.9296  | 0.36374  | 0.489769 | -6.06726 |
| TTLL1     | -0.19445 | 0.314504 | -0.92951 | 0.363784 | 0.489794 | -6.06734 |
| RIPPLY1   | 0.222938 | 0.1063   | 0.929452 | 0.363813 | 0.4898   | -6.06739 |
| SLC38A10  | -0.16383 | 0.245145 | -0.9294  | 0.363839 | 0.489802 | -6.06744 |
| LOC401010 | 0.124396 | -0.14356 | 0.929312 | 0.363883 | 0.489827 | -6.06752 |
| RASA3     | 0.242027 | 0.142457 | 0.928981 | 0.36405  | 0.489985 | -6.06782 |
| IL21      | 0.172208 | -0.05512 | 0.928801 | 0.364142 | 0.490074 | -6.06799 |
| HLA-DRB4  | 1.107884 | -1.37717 | 0.928477 | 0.364305 | 0.490217 | -6.06829 |
| OTOL1     | -0.13441 | 0.016475 | -0.92844 | 0.364323 | 0.490217 | -6.06832 |
| EMP3      | 0.169917 | 0.042816 | 0.928351 | 0.364369 | 0.490246 | -6.0684  |
| MRFAP1    | -0.16722 | 0.014347 | -0.9283  | 0.364396 | 0.490248 | -6.06845 |
| EXD2      | -0.17093 | 0.002989 | -0.92819 | 0.364449 | 0.490286 | -6.06855 |
| TPO       | 0.182023 | -0.6252  | 0.43158  | 0.675326 | 0.768959 | -6.06864 |
| ADRA1B    | 0.20945  | -0.28729 | 0.928074 | 0.364509 | 0.490307 | -6.06865 |
| SSR4P1    | -0.43123 | 0.394745 | -0.92806 | 0.364515 | 0.490307 | -6.06866 |
| GPX5      | 0.214212 | -0.15672 | 0.927921 | 0.364587 | 0.490358 | -6.06879 |
| C11orf35  | 0.141978 | -0.02572 | 0.92789  | 0.364602 | 0.490358 | -6.06882 |
| CPNE4     | 0.200124 | -0.17728 | 0.902405 | 0.378848 | 0.50453  | -6.06925 |
| NUDT16    | -0.25823 | -0.09356 | -0.92725 | 0.364928 | 0.490762 | -6.06941 |
| ZNF428    | -0.19358 | 0.185699 | -0.92714 | 0.36498  | 0.490798 | -6.0695  |
| PAQR3     | -0.31117 | -0.24014 | -0.92688 | 0.365112 | 0.490888 | -6.06974 |
| OR2A9P    | -0.27812 | 0.130769 | -0.92687 | 0.365117 | 0.490888 | -6.06975 |
| MGAT1     | 0.151514 | -0.08441 | 0.926864 | 0.365122 | 0.490888 | -6.06976 |
| SLC16A1   | 0.135054 | -0.27043 | 0.926691 | 0.36521  | 0.490972 | -6.06991 |
| RHPN2     | 0.199476 | -0.18681 | 0.914903 | 0.371789 | 0.49751  | -6.07017 |
| DIAPH3    | 0.170249 | -0.01761 | 0.926244 | 0.365436 | 0.491188 | -6.07032 |
| GCLC      | -0.25586 | -0.071   | -0.92623 | 0.365445 | 0.491188 | -6.07034 |
| GRIK1-AS2 | -0.20929 | 0.237401 | -0.926   | 0.365558 | 0.491306 | -6.07054 |
| S100A5    | 0.112078 | -0.0506  | 0.925894 | 0.365614 | 0.491347 | -6.07064 |
| FAM98A    | -0.10863 | -0.02978 | -0.92579 | 0.365668 | 0.491386 | -6.07074 |
| BHMT2     | 0.355299 | -0.04768 | 0.925654 | 0.365735 | 0.491443 | -6.07086 |
| SDCCAG3   | -0.18764 | 0.203059 | -0.92541 | 0.365858 | 0.491506 | -6.07108 |
| UBA52     | 0.219673 | -0.26752 | 0.925136 | 0.365998 | 0.491661 | -6.07133 |
| MGEA5     | 0.237685 | -0.22255 | 0.924969 | 0.366083 | 0.491685 | -6.07148 |
| LOC100505 | -0.40461 | 0.214178 | -0.92495 | 0.366091 | 0.491685 | -6.0715  |
| TRPT1     | -0.15141 | 0.102699 | -0.92478 | 0.366178 | 0.491768 | -6.07165 |
| C2orf57   | -0.16582 | -0.0545  | -0.91288 | 0.372823 | 0.498438 | -6.07199 |
| LOC100130 | 0.249607 | -0.12709 | 0.924249 | 0.366448 | 0.492053 | -6.07214 |
| TPRX1     | 0.151458 | -0.06409 | 0.92422  | 0.366463 | 0.492053 | -6.07216 |
| CNPPD1    | -0.16901 | 0.200716 | -0.92421 | 0.366466 | 0.492053 | -6.07217 |
| FMO4      | 0.389693 | 0.163069 | 0.923857 | 0.366648 | 0.492264 | -6.07249 |
| LOC100505 | 0.061975 | -0.01142 | 0.866387 | 0.397164 | 0.522986 | -6.0726  |
| NXN       | 0.333823 | 0.03877  | 0.911432 | 0.373568 | 0.499024 | -6.07329 |
| SEPHS1    | -0.34501 | 0.610952 | -0.92297 | 0.367098 | 0.4928   | -6.0733  |
| DNAJC22   | 0.064693 | -0.01294 | 0.922874 | 0.367147 | 0.492833 | -6.07339 |
| BMPR2     | -0.52788 | 0.859501 | -0.92251 | 0.36733  | 0.493045 | -6.07372 |

|           |          |          |          |          |          |          |
|-----------|----------|----------|----------|----------|----------|----------|
| CGREF1    | 0.233174 | -0.16276 | 0.853588 | 0.404634 | 0.530185 | -6.0739  |
| BPIFB1    | -0.1882  | 0.041649 | -0.92219 | 0.367494 | 0.493176 | -6.07401 |
| DNAH5     | 0.221832 | -0.11476 | 0.922174 | 0.367503 | 0.493176 | -6.07402 |
| FGF11     | 0.26931  | -0.22848 | 0.910212 | 0.374194 | 0.499623 | -6.07438 |
| MGC15885  | 0.191085 | -0.09923 | 0.921518 | 0.367837 | 0.493589 | -6.07462 |
| LOC72801  | -0.20286 | 0.108184 | -0.90981 | 0.374403 | 0.499834 | -6.07475 |
| CLYBL     | 0.284315 | -0.13524 | 0.921227 | 0.367985 | 0.493754 | -6.07488 |
| TSHR      | 0.323305 | 0.075536 | 0.921059 | 0.368071 | 0.49381  | -6.07503 |
| IPO9      | -0.17558 | 0.494358 | -0.92105 | 0.368077 | 0.49381  | -6.07505 |
| RAP2B     | 0.145141 | -0.04814 | 0.920617 | 0.368296 | 0.49407  | -6.07543 |
| ATP2B1    | 0.265168 | 0.074063 | 0.920506 | 0.368352 | 0.494112 | -6.07554 |
| CCDC90A   | -0.31006 | 0.684025 | -0.92011 | 0.368555 | 0.49435  | -6.0759  |
| RAD51D    | -0.20124 | 0.503546 | -0.91981 | 0.368705 | 0.49445  | -6.07616 |
| INSM2     | -0.39675 | 0.123666 | -0.91916 | 0.369038 | 0.49482  | -6.07675 |
| TNFAIP8L1 | 0.278888 | 0.192319 | 0.919086 | 0.369076 | 0.49482  | -6.07682 |
| ITK       | 0.52374  | -0.38704 | 0.91908  | 0.36908  | 0.49482  | -6.07683 |
| HDHD1     | -0.19336 | 0.120561 | -0.91894 | 0.369149 | 0.49482  | -6.07695 |
| C11orf84  | -0.16883 | 0.623188 | -0.91883 | 0.369208 | 0.49482  | -6.07705 |
| SNHG7     | 0.275082 | -0.29999 | 0.728338 | 0.478528 | 0.599967 | -6.07717 |
| FAM47B    | -0.06424 | 0.012848 | -0.91867 | 0.369287 | 0.494867 | -6.07719 |
| NF2       | -0.27575 | 0.63215  | -0.91866 | 0.369294 | 0.494867 | -6.07721 |
| PMPCA     | 0.15299  | -0.12456 | 0.918317 | 0.369469 | 0.495068 | -6.07752 |
| NTAN1     | 0.127883 | -0.17779 | 0.9179   | 0.369682 | 0.495319 | -6.07789 |
| SMAP2     | -0.32616 | 0.377661 | -0.91732 | 0.369981 | 0.495651 | -6.07842 |
| UNC13C    | 0.29527  | -0.04777 | 0.905464 | 0.376639 | 0.502169 | -6.07863 |
| RAC1      | -0.2361  | 0.042449 | -0.91702 | 0.370131 | 0.49582  | -6.07869 |
| FLJ36000  | 0.200188 | -0.4274  | 0.905191 | 0.37678  | 0.502288 | -6.07888 |
| MCART1    | 0.120042 | -0.15809 | 0.916757 | 0.370266 | 0.495967 | -6.07893 |
| TTC19     | 0.327371 | -0.02207 | 0.916164 | 0.370569 | 0.496301 | -6.07946 |
| CACNB1    | 0.259182 | 0.224894 | 0.915979 | 0.370664 | 0.496364 | -6.07963 |
| TMPRSS11  | -0.21862 | -0.28713 | -0.8581  | 0.401606 | 0.5271   | -6.07965 |
| TSC22D2   | 0.12686  | -0.04231 | 0.915724 | 0.370795 | 0.496504 | -6.07986 |
| WDHD1     | -0.27606 | 0.279714 | -0.91543 | 0.370944 | 0.496671 | -6.08012 |
| PFN3      | 0.199859 | -0.15347 | 0.915079 | 0.371125 | 0.496879 | -6.08044 |
| PGCP      | -0.35312 | 0.186152 | -0.91478 | 0.371276 | 0.497013 | -6.0807  |
| OLFML2B   | -0.17096 | 0.149897 | -0.91463 | 0.371356 | 0.497087 | -6.08085 |
| PPP2R5D   | 0.116485 | 0.008277 | 0.914348 | 0.371499 | 0.497244 | -6.0811  |
| C9orf7    | 0.171584 | -0.14699 | 0.914038 | 0.371658 | 0.497393 | -6.08138 |
| CD79B     | -0.3249  | 0.404121 | -0.91403 | 0.371661 | 0.497393 | -6.08138 |
| IQCF2     | -0.11466 | -0.03923 | -0.91361 | 0.371877 | 0.49758  | -6.08176 |
| RHBDL3    | -0.12396 | 0.033028 | -0.90195 | 0.378456 | 0.504145 | -6.08176 |
| CD151     | 0.327169 | -0.00897 | 0.913526 | 0.371921 | 0.49758  | -6.08184 |
| DPF3      | -0.21266 | 0.212902 | -0.9134  | 0.371987 | 0.497624 | -6.08195 |
| LUZP2     | 0.314892 | 0.188935 | 0.9133   | 0.372037 | 0.497658 | -6.08204 |
| CHEK2     | 0.303343 | 0.017199 | 0.901593 | 0.37864  | 0.504356 | -6.08208 |
| G6PC3     | -0.16272 | 0.022784 | -0.91324 | 0.37207  | 0.497668 | -6.0821  |
| SCARF1    | -0.28422 | 0.1675   | -0.9131  | 0.372142 | 0.49773  | -6.08222 |

|          |          |          |          |          |          |          |
|----------|----------|----------|----------|----------|----------|----------|
| YPEL5    | 0.250694 | -0.61173 | 0.913042 | 0.372169 | 0.497733 | -6.08227 |
| RASSF2   | -0.26074 | -0.02187 | -0.91249 | 0.372453 | 0.498078 | -6.08277 |
| PHYHIP   | -0.29458 | -0.17397 | -0.91238 | 0.372508 | 0.498093 | -6.08287 |
| KRT34    | -0.24609 | -0.0509  | -0.91237 | 0.372515 | 0.498093 | -6.08288 |
| SAMD7    | 0.176454 | -0.22067 | 0.91231  | 0.372545 | 0.498099 | -6.08293 |
| TEKT4    | 0.224185 | 0.122642 | 0.91162  | 0.372899 | 0.498455 | -6.08355 |
| LPHN3    | 0.082234 | -0.03195 | 0.911594 | 0.372913 | 0.498455 | -6.08357 |
| RAP1GAP  | 0.443941 | 0.366493 | 0.911593 | 0.372913 | 0.498455 | -6.08357 |
| TMEM106  | -0.16452 | 0.302526 | -0.91137 | 0.373025 | 0.498571 | -6.08377 |
| RPL23AP8 | 0.279854 | 0.262367 | 0.911325 | 0.373051 | 0.498572 | -6.08382 |
| ESRRA    | 0.261702 | 0.052738 | 0.910937 | 0.37325  | 0.498804 | -6.08416 |
| HERC2P7  | -0.2166  | 0.020576 | -0.82777 | 0.419362 | 0.544243 | -6.08425 |
| UHMK1    | -0.22952 | 0.041508 | -0.91081 | 0.373315 | 0.498851 | -6.08428 |
| RIN2     | 0.268986 | -0.09521 | 0.91077  | 0.373336 | 0.498851 | -6.08431 |
| ZNF609   | -0.19482 | 0.402406 | -0.91072 | 0.373361 | 0.498851 | -6.08436 |
| LRRC20   | 0.24145  | 0.122121 | 0.910551 | 0.373449 | 0.498933 | -6.08451 |
| VCP      | -0.22047 | 0.197869 | -0.91039 | 0.37353  | 0.499008 | -6.08465 |
| TPD52L1  | -0.16042 | -0.11436 | -0.85217 | 0.404806 | 0.530234 | -6.08466 |
| WNT8B    | -0.16847 | -0.09248 | -0.84064 | 0.411659 | 0.536873 | -6.08475 |
| GABRR2   | 0.231645 | -0.14637 | 0.910045 | 0.373709 | 0.499178 | -6.08496 |
| SLC2A5   | 0.338355 | 0.30938  | 0.909997 | 0.373734 | 0.499178 | -6.08501 |
| DNAJB7   | -0.07817 | 0.015634 | -0.90967 | 0.373902 | 0.499368 | -6.0853  |
| MYO1E    | -0.23314 | 0.547726 | -0.90945 | 0.374015 | 0.499472 | -6.0855  |
| PPP2R4   | 0.171265 | 0.045394 | 0.909421 | 0.37403  | 0.499472 | -6.08552 |
| C19orf40 | 0.094464 | -0.03507 | 0.909252 | 0.374117 | 0.499554 | -6.08567 |
| CDHR1    | -0.13314 | 0.214743 | -0.90875 | 0.374373 | 0.499828 | -6.08612 |
| CCDC9    | -0.1763  | 0.007739 | -0.9086  | 0.374452 | 0.499865 | -6.08626 |
| GJA8     | -0.1379  | -0.01912 | -0.90834 | 0.374585 | 0.499965 | -6.08649 |
| NDUFB10  | 0.14494  | -0.19399 | 0.908308 | 0.374604 | 0.499965 | -6.08652 |
| CACYBP   | -0.26854 | 0.340272 | -0.9082  | 0.37466  | 0.499993 | -6.08662 |
| ZNF30    | 0.450763 | -0.08014 | 0.907293 | 0.375127 | 0.500561 | -6.08743 |
| VWC2     | 0.304221 | 0.074703 | 0.895445 | 0.381833 | 0.507687 | -6.08753 |
| ARAP3    | 0.31049  | 0.082386 | 0.907111 | 0.375221 | 0.500652 | -6.08759 |
| ESCO2    | -0.44052 | 0.469303 | -0.89535 | 0.381884 | 0.50771  | -6.08761 |
| DCBLD2   | -0.18334 | -0.2433  | -0.90702 | 0.375268 | 0.500665 | -6.08767 |
| LGALS13  | 0.314225 | -0.20817 | 0.895256 | 0.381931 | 0.507739 | -6.08769 |
| TIMM10   | -0.38627 | 0.656403 | -0.90699 | 0.375282 | 0.500665 | -6.0877  |
| ARHGAP44 | -0.14386 | 0.241494 | -0.89434 | 0.38241  | 0.508237 | -6.0885  |
| B4GALT7  | -0.13602 | 0.21928  | -0.90593 | 0.375828 | 0.50136  | -6.08864 |
| XCL1     | 0.210101 | -0.03315 | 0.905726 | 0.375936 | 0.501469 | -6.08883 |
| BCL2L15  | -0.20092 | -0.21572 | -0.87989 | 0.390599 | 0.516424 | -6.08904 |
| CRTC1    | -0.1786  | 0.525432 | -0.90544 | 0.376083 | 0.501598 | -6.08908 |
| MGC14436 | 0.282353 | -0.14243 | 0.893444 | 0.382876 | 0.508626 | -6.08929 |
| HPS1     | -0.1249  | 0.059647 | -0.90498 | 0.37632  | 0.501879 | -6.08949 |
| MVP      | -0.14024 | 0.202035 | -0.90448 | 0.376578 | 0.502156 | -6.08994 |
| ERN1     | -0.16014 | -0.00323 | -0.90443 | 0.376608 | 0.502161 | -6.08999 |
| Mar-01   | -0.41823 | 0.263523 | -0.90419 | 0.376728 | 0.502252 | -6.09019 |

|           |          |          |          |          |          |          |
|-----------|----------|----------|----------|----------|----------|----------|
| PTBP1     | 0.210147 | 0.107643 | 0.903757 | 0.376954 | 0.502485 | -6.09058 |
| C6orf228  | 0.276113 | 0.180814 | 0.903665 | 0.377002 | 0.502515 | -6.09066 |
| CCDC94    | -0.18173 | 0.446339 | -0.90344 | 0.377119 | 0.502637 | -6.09087 |
| STAB2     | 0.153005 | -0.10187 | 0.903011 | 0.37734  | 0.502897 | -6.09125 |
| POU4F3    | -0.15844 | -0.27517 | -0.81899 | 0.424214 | 0.54896  | -6.09142 |
| BCAS1     | -0.25335 | -0.02342 | -0.84398 | 0.409255 | 0.534597 | -6.09153 |
| NEK7      | -0.40802 | -0.43977 | -0.90261 | 0.377547 | 0.503139 | -6.0916  |
| PLA2G4F   | -0.1436  | -0.09539 | -0.90248 | 0.377613 | 0.503193 | -6.09172 |
| PCDHGB3   | -0.35693 | -0.01218 | -0.89063 | 0.384345 | 0.509979 | -6.09177 |
| FAM132A   | 0.169729 | 0.003027 | 0.902246 | 0.377736 | 0.503318 | -6.09193 |
| VLDLR     | 0.300076 | -0.05309 | 0.902204 | 0.377758 | 0.503318 | -6.09196 |
| PLAT      | -0.20101 | 0.159385 | -0.90215 | 0.377788 | 0.503323 | -6.09202 |
| NAGLU     | -0.1513  | 0.180114 | -0.90134 | 0.378207 | 0.503848 | -6.09274 |
| ZNF17     | -0.24962 | 0.076913 | -0.90033 | 0.378729 | 0.50444  | -6.09363 |
| MLEC      | -0.13055 | 0.334601 | -0.90027 | 0.378761 | 0.504448 | -6.09368 |
| CCDC91    | -0.13169 | 0.000105 | -0.89928 | 0.379275 | 0.50503  | -6.09456 |
| HARBI1    | -0.23162 | 0.211475 | -0.8989  | 0.379475 | 0.505261 | -6.0949  |
| GAD1      | -0.08567 | 0.000741 | -0.89884 | 0.379506 | 0.505269 | -6.09496 |
| ZFP64     | 0.231759 | -0.02945 | 0.898686 | 0.379584 | 0.505339 | -6.09509 |
| TTYH2     | -0.20906 | 0.560483 | -0.89841 | 0.379726 | 0.505493 | -6.09533 |
| KCNS1     | 0.309454 | -0.03063 | 0.797619 | 0.436868 | 0.56109  | -6.09545 |
| FTH1      | -0.19995 | 0.446504 | -0.89825 | 0.379811 | 0.505571 | -6.09547 |
| LOC388946 | -0.26314 | -0.02555 | -0.8723  | 0.394618 | 0.520403 | -6.09562 |
| ABHD14B   | -0.26796 | 0.706913 | -0.89799 | 0.379947 | 0.505718 | -6.09571 |
| LYPD6B    | 0.372305 | -0.44411 | 0.897826 | 0.380031 | 0.505796 | -6.09585 |
| CNKS3     | 0.324329 | 0.03184  | 0.897695 | 0.3801   | 0.505853 | -6.09597 |
| BMP1B     | -0.18194 | -0.06235 | -0.89723 | 0.380341 | 0.506139 | -6.09638 |
| Sep-12    | -0.15898 | -0.07993 | -0.89709 | 0.380412 | 0.5062   | -6.0965  |
| UAP1L1    | -0.1584  | 0.096373 | -0.8963  | 0.380825 | 0.506715 | -6.0972  |
| MARK4     | -0.17675 | 0.081793 | -0.89591 | 0.381028 | 0.506951 | -6.09754 |
| SUSD4     | -0.30857 | 0.225662 | -0.89579 | 0.38109  | 0.506999 | -6.09765 |
| RTP4      | -0.64618 | 0.401998 | -0.8954  | 0.381293 | 0.507235 | -6.09799 |
| FCHO2     | -0.39786 | -0.1494  | -0.89532 | 0.381336 | 0.507257 | -6.09806 |
| BRDT      | 0.071515 | -0.03186 | 0.895245 | 0.381376 | 0.507276 | -6.09813 |
| HIC1      | -0.25082 | 0.31263  | -0.89494 | 0.381534 | 0.507452 | -6.0984  |
| PRO1596   | 0.381631 | 0.122433 | 0.894887 | 0.381563 | 0.507455 | -6.09845 |
| MRPL39    | -0.24738 | -0.02426 | -0.89472 | 0.381649 | 0.507536 | -6.09859 |
| OR10H1    | 0.174167 | -0.4049  | 0.894609 | 0.381708 | 0.507579 | -6.09869 |
| LOC157860 | 0.151588 | -0.27103 | 0.835146 | 0.414087 | 0.53904  | -6.09887 |
| IL12RB2   | 0.382648 | 0.360052 | 0.894354 | 0.381841 | 0.507687 | -6.09892 |
| DSG2      | -0.15882 | 0.037176 | -0.88221 | 0.388767 | 0.514709 | -6.09914 |
| CBS       | -0.39408 | 0.281088 | -0.89401 | 0.382022 | 0.507824 | -6.09922 |
| ATP8B3    | -0.27133 | 0.061123 | -0.89376 | 0.382151 | 0.507962 | -6.09944 |
| PPIL3     | -0.2337  | -0.16699 | -0.89356 | 0.382255 | 0.508065 | -6.09962 |
| POLR2L    | 0.208234 | -0.02684 | 0.893018 | 0.382539 | 0.508339 | -6.1001  |
| PI4KA     | -0.17116 | 0.338486 | -0.89286 | 0.38262  | 0.508407 | -6.10023 |
| PIWIL3    | -0.18768 | -0.26999 | -0.82956 | 0.419094 | 0.543993 | -6.10038 |

|           |          |          |          |          |          |          |
|-----------|----------|----------|----------|----------|----------|----------|
| GPM6B     | 0.260088 | 0.119591 | 0.880761 | 0.389531 | 0.515359 | -6.1004  |
| FAM160B2  | -0.15515 | 0.3897   | -0.89257 | 0.382773 | 0.508547 | -6.10049 |
| LOC64303  | 0.220837 | 0.129873 | 0.832939 | 0.415301 | 0.54026  | -6.10069 |
| TMEM68    | 0.195593 | -0.18987 | 0.892186 | 0.382974 | 0.50871  | -6.10083 |
| MGC50722  | -0.41352 | 0.681801 | -0.89189 | 0.383127 | 0.50888  | -6.10109 |
| TAB3      | -0.22306 | 0.048176 | -0.89182 | 0.383163 | 0.508893 | -6.10115 |
| SPG21     | 0.141701 | -0.338   | 0.891665 | 0.383246 | 0.508968 | -6.10129 |
| CLCC1     | -0.15566 | 0.261755 | -0.89153 | 0.383319 | 0.509031 | -6.10141 |
| BIVM      | 0.270386 | 0.28458  | 0.879411 | 0.390243 | 0.516069 | -6.10157 |
| LPPR1     | 0.328621 | -0.26038 | 0.89126  | 0.383458 | 0.509153 | -6.10164 |
| ACVRL1    | -0.2887  | 0.420881 | -0.89125 | 0.383463 | 0.509153 | -6.10165 |
| C14orf167 | -0.15557 | -0.14338 | -0.89118 | 0.383499 | 0.509167 | -6.10171 |
| P2RY8     | 0.200692 | 0.148313 | 0.89092  | 0.383636 | 0.509279 | -6.10194 |
| LOC64794  | -0.26251 | -0.20324 | -0.8906  | 0.383805 | 0.509469 | -6.10223 |
| RPL19P12  | 0.275352 | -0.06256 | 0.890492 | 0.38386  | 0.509508 | -6.10232 |
| LRRC49    | -0.12968 | -0.11978 | -0.80537 | 0.431812 | 0.556274 | -6.10239 |
| KRTAP13-2 | -0.1099  | -0.17788 | -0.76841 | 0.454277 | 0.57708  | -6.10252 |
| CTSS      | -0.43601 | 0.050592 | -0.89023 | 0.383996 | 0.509654 | -6.10255 |
| KIAA1462  | -0.38459 | 0.194263 | -0.89007 | 0.384083 | 0.509723 | -6.10269 |
| LRIT1     | 0.110755 | -0.15423 | 0.889837 | 0.384203 | 0.509825 | -6.1029  |
| SPC24     | -0.27271 | 0.429544 | -0.87753 | 0.39124  | 0.517096 | -6.10321 |
| WBP2NL    | 0.330574 | 0.191385 | 0.877383 | 0.391315 | 0.517161 | -6.10333 |
| SLC22A7   | 0.189603 | -0.20196 | 0.889249 | 0.384511 | 0.510165 | -6.10341 |
| RPL23     | 0.463489 | -1.21678 | 0.888898 | 0.384696 | 0.510375 | -6.10372 |
| HDHD3     | -0.25527 | 0.480285 | -0.88874 | 0.384778 | 0.510449 | -6.10386 |
| LOC73010  | 0.19577  | -0.27186 | 0.862689 | 0.399742 | 0.525531 | -6.10386 |
| ELAC1     | -0.23313 | 0.056777 | -0.88849 | 0.384908 | 0.510588 | -6.10407 |
| NXPH1     | 0.149192 | -0.03657 | 0.888176 | 0.385074 | 0.510773 | -6.10435 |
| CCDC77    | -0.13666 | 0.084787 | -0.8875  | 0.385428 | 0.511208 | -6.10494 |
| TRPC5     | 0.174191 | -0.12597 | 0.887217 | 0.385578 | 0.511372 | -6.10519 |
| WNT5B     | -0.27888 | 0.459434 | -0.8866  | 0.3859   | 0.511765 | -6.10573 |
| SERGEF    | 0.168233 | 0.240192 | 0.886547 | 0.38593  | 0.51177  | -6.10578 |
| LUC7L3    | -0.3377  | -0.26637 | -0.88648 | 0.385967 | 0.511785 | -6.10584 |
| RNF207    | 0.191246 | -0.03011 | 0.886411 | 0.386001 | 0.511795 | -6.1059  |
| C20orf4   | 0.178435 | -0.17547 | 0.88609  | 0.38617  | 0.511984 | -6.10618 |
| TGM1      | -0.28746 | 0.385231 | -0.88551 | 0.386473 | 0.512351 | -6.10668 |
| RPL22L1   | -0.60438 | -0.45405 | -0.88533 | 0.386568 | 0.512442 | -6.10684 |
| GYPE      | 0.203521 | -0.54477 | 0.885187 | 0.386645 | 0.51251  | -6.10697 |
| ZNF264    | -0.2239  | 0.092647 | -0.88512 | 0.386679 | 0.51252  | -6.10702 |
| C11orf10  | 0.183503 | -0.05128 | 0.884262 | 0.387132 | 0.513087 | -6.10778 |
| POP5      | -0.22036 | 0.063238 | -0.88418 | 0.387176 | 0.51311  | -6.10785 |
| PCDH17    | -0.11335 | -0.59414 | -0.23129 | 0.822993 | 0.884135 | -6.10831 |
| GRIN3A    | -0.3058  | 0.346791 | -0.8714  | 0.394488 | 0.520336 | -6.1085  |
| SIK3      | 0.274761 | 0.168401 | 0.883348 | 0.387614 | 0.513655 | -6.10857 |
| C6orf123  | -0.19213 | -0.10475 | -0.81954 | 0.424619 | 0.549317 | -6.10859 |
| HCG26     | -0.52544 | 0.705571 | -0.88306 | 0.387764 | 0.513786 | -6.10882 |
| ATF7      | -0.06054 | 0.012108 | -0.88306 | 0.387765 | 0.513786 | -6.10882 |



|           |          |          |          |          |          |          |
|-----------|----------|----------|----------|----------|----------|----------|
| NT5DC1    | 0.189887 | -0.28729 | 0.882981 | 0.387807 | 0.513808 | -6.10889 |
| ATP6VOC   | -0.22683 | 0.535475 | -0.88282 | 0.387891 | 0.513827 | -6.10903 |
| ZC3H12D   | 0.246019 | 0.066745 | 0.882804 | 0.387901 | 0.513827 | -6.10905 |
| LRRC1     | -0.27121 | 0.188482 | -0.88202 | 0.388315 | 0.514271 | -6.10973 |
| MYB       | 0.297423 | -0.08201 | 0.881782 | 0.38844  | 0.514402 | -6.10994 |
| RCAN3     | 0.283182 | 0.179753 | 0.881315 | 0.388687 | 0.514694 | -6.11035 |
| OTUD7B    | -0.23715 | 0.056514 | -0.88119 | 0.388754 | 0.514709 | -6.11046 |
| GRN       | 0.207451 | 0.134399 | 0.881059 | 0.388822 | 0.514718 | -6.11057 |
| ORMDL1    | -0.21376 | -0.24839 | -0.88103 | 0.388836 | 0.514718 | -6.11059 |
| C6orf225  | 0.379345 | -0.21673 | 0.794581 | 0.437896 | 0.562116 | -6.11097 |
| TSPAN3    | 0.365541 | 0.443384 | 0.880421 | 0.389159 | 0.51511  | -6.11112 |
| CSTT      | 0.055808 | -0.01116 | 0.880272 | 0.389237 | 0.515168 | -6.11125 |
| TMPRSS15  | 0.319387 | -0.40206 | 0.819999 | 0.422457 | 0.54757  | -6.11129 |
| KIF2A     | -0.19463 | 0.080222 | -0.88016 | 0.389297 | 0.515168 | -6.11135 |
| TBC1D19   | 0.303617 | 0.103091 | 0.880143 | 0.389306 | 0.515168 | -6.11136 |
| RGAG1     | -0.29508 | -0.05605 | -0.86802 | 0.396293 | 0.522085 | -6.11141 |
| DPPA4     | -0.3991  | 0.335449 | -0.86797 | 0.39632  | 0.522086 | -6.11145 |
| C20orf103 | -0.2489  | 0.443338 | -0.88001 | 0.389374 | 0.515221 | -6.11148 |
| LOC100506 | 0.467612 | 0.152833 | 0.879812 | 0.389481 | 0.515327 | -6.11165 |
| CTHRC1    | -0.1363  | -0.29879 | -0.80761 | 0.429938 | 0.554443 | -6.11172 |
| LOC100287 | 0.309328 | -0.37829 | 0.730502 | 0.477246 | 0.598858 | -6.11175 |
| POLDIP3   | 0.093293 | -0.00525 | 0.879513 | 0.389639 | 0.515449 | -6.11191 |
| ALKBH5    | -0.22489 | 0.349503 | -0.87949 | 0.389652 | 0.515449 | -6.11193 |
| ZNF225    | 0.310243 | 0.148765 | 0.879168 | 0.389821 | 0.515639 | -6.11221 |
| SF3B5     | -0.16588 | 0.044436 | -0.87903 | 0.389893 | 0.515699 | -6.11233 |
| HNF1B     | -0.1862  | -0.00827 | -0.8787  | 0.390067 | 0.515895 | -6.11262 |
| ALPK3     | -0.30881 | 0.64398  | -0.87835 | 0.390252 | 0.516069 | -6.11292 |
| MRAP2     | 0.272265 | 0.060762 | 0.851761 | 0.40562  | 0.531158 | -6.11314 |
| GPRC5B    | -0.15214 | -0.01077 | -0.8779  | 0.390491 | 0.516351 | -6.11331 |
| TMCO4     | 0.222015 | 0.101845 | 0.877732 | 0.390582 | 0.516424 | -6.11346 |
| BAG2      | -0.34426 | 0.289009 | -0.86533 | 0.397726 | 0.523585 | -6.11371 |
| MEST      | -0.2609  | 0.356477 | -0.87733 | 0.390796 | 0.516593 | -6.11381 |
| IL13RA1   | -0.23961 | 0.120001 | -0.87731 | 0.390807 | 0.516593 | -6.11383 |
| KCNN3     | -0.43356 | 1.300532 | -0.8769  | 0.391021 | 0.516842 | -6.11418 |
| KCNQ5     | -0.16061 | -0.08842 | -0.86458 | 0.398131 | 0.523908 | -6.11436 |
| ZFX       | -0.18585 | 0.029654 | -0.87625 | 0.391365 | 0.517193 | -6.11474 |
| PTGER3    | -0.27551 | 0.136536 | -0.87618 | 0.391404 | 0.517209 | -6.1148  |
| CCT7      | 0.15417  | -0.0926  | 0.876114 | 0.391439 | 0.517212 | -6.11486 |
| CLDN6     | 0.177492 | -0.15671 | 0.876046 | 0.391475 | 0.517212 | -6.11492 |
| RBM3      | -0.30307 | -0.45677 | -0.87603 | 0.391486 | 0.517212 | -6.11494 |
| CHPF      | 0.208821 | -0.30923 | 0.87564  | 0.391691 | 0.517413 | -6.11527 |
| SULT1A1   | -0.31858 | 0.046211 | -0.87513 | 0.39196  | 0.517734 | -6.11571 |
| RAB3A     | -0.26664 | 0.303898 | -0.87505 | 0.392004 | 0.517757 | -6.11578 |
| RPS9      | 0.502418 | -0.09392 | 0.874755 | 0.392161 | 0.517929 | -6.11604 |
| RRP1B     | -0.34816 | 0.275013 | -0.87441 | 0.392344 | 0.518136 | -6.11633 |
| KIAA0664L | 0.257927 | 0.119961 | 0.874055 | 0.392533 | 0.518351 | -6.11664 |
| CDC16     | -0.15445 | -0.15644 | -0.87343 | 0.392863 | 0.518717 | -6.11718 |

|           |          |          |          |          |          |          |
|-----------|----------|----------|----------|----------|----------|----------|
| C11orf93  | -0.201   | 0.095528 | -0.87337 | 0.392898 | 0.518728 | -6.11723 |
| LOC100128 | 0.180231 | -0.23065 | 0.708582 | 0.488866 | 0.608837 | -6.11746 |
| LOC21973  | -0.14541 | 0.014161 | -0.87292 | 0.393134 | 0.519004 | -6.11762 |
| PHF2      | 0.16311  | 0.111881 | 0.872843 | 0.393177 | 0.519027 | -6.11769 |
| C3orf75   | 0.196677 | -0.18584 | 0.872714 | 0.393246 | 0.519083 | -6.1178  |
| LILRB1    | -0.05845 | 0.011365 | -0.79981 | 0.434329 | 0.558745 | -6.11795 |
| POLB      | 0.059094 | -0.0174  | 0.872356 | 0.393436 | 0.519278 | -6.11811 |
| PDLIM2    | 0.130904 | 0.047517 | 0.872328 | 0.393452 | 0.519278 | -6.11813 |
| ACTL6A    | 0.171013 | -0.23965 | 0.872286 | 0.393474 | 0.519278 | -6.11817 |
| MMP3      | -0.23596 | -0.25022 | -0.85995 | 0.400615 | 0.526222 | -6.11831 |
| NEIL2     | 0.232937 | -0.28165 | 0.871418 | 0.393936 | 0.519811 | -6.11892 |
| CAMK2D    | -0.26258 | 0.249241 | -0.87141 | 0.393943 | 0.519811 | -6.11893 |
| TAB1      | 0.167615 | 0.18135  | 0.871378 | 0.393957 | 0.519811 | -6.11895 |
| LINC00208 | 0.141178 | -0.2897  | 0.87116  | 0.394073 | 0.51993  | -6.11914 |
| PXT1      | -0.20462 | 0.070474 | -0.85877 | 0.401247 | 0.52677  | -6.11931 |
| LILRA1    | -0.27274 | 0.387457 | -0.87083 | 0.39425  | 0.520128 | -6.11942 |
| KRT4      | 0.158545 | -0.15236 | 0.870735 | 0.3943   | 0.520148 | -6.1195  |
| STUB1     | 0.119528 | -0.10289 | 0.870699 | 0.394319 | 0.520148 | -6.11953 |
| C1orf126  | -0.20423 | 0.070879 | -0.85831 | 0.401495 | 0.527025 | -6.1197  |
| DEFT1P    | 0.470467 | 0.114609 | 0.870291 | 0.394537 | 0.520366 | -6.11989 |
| CCT6P1    | -0.28645 | 0.051753 | -0.86992 | 0.394732 | 0.520471 | -6.1202  |
| ZNF91     | -0.26945 | 0.047544 | -0.8699  | 0.394747 | 0.520471 | -6.12022 |
| MBD1      | -0.22709 | 0.425088 | -0.86989 | 0.39475  | 0.520471 | -6.12023 |
| GAA       | -0.25948 | 0.283806 | -0.86932 | 0.395056 | 0.52084  | -6.12072 |
| RPE65     | -0.05473 | 0.010946 | -0.86915 | 0.395144 | 0.52089  | -6.12087 |
| MITF      | -0.30749 | 0.594948 | -0.86915 | 0.395147 | 0.52089  | -6.12087 |
| LOC100128 | -0.4268  | 0.853357 | -0.86894 | 0.395258 | 0.521002 | -6.12105 |
| KLK1      | 0.265208 | 0.304528 | 0.86857  | 0.395455 | 0.521226 | -6.12136 |
| PTGES2    | -0.23595 | 0.428679 | -0.8685  | 0.395493 | 0.521241 | -6.12143 |
| GPKOW     | -0.10643 | 0.089995 | -0.86844 | 0.395524 | 0.521247 | -6.12148 |
| C3orf26   | -0.33039 | 0.490026 | -0.86836 | 0.395567 | 0.521268 | -6.12154 |
| ZDBF2     | -0.27686 | -0.24831 | -0.74318 | 0.468955 | 0.590666 | -6.12157 |
| C5orf28   | -0.37122 | -0.12778 | -0.82428 | 0.421286 | 0.546342 | -6.12173 |
| HOXA11    | -0.2366  | -0.05209 | -0.86801 | 0.395757 | 0.521483 | -6.12185 |
| HPD       | -0.51714 | 0.160082 | -0.85556 | 0.402978 | 0.528369 | -6.12203 |
| ST3GAL5   | -0.38059 | 0.407075 | -0.86737 | 0.396094 | 0.521893 | -6.12239 |
| ANO2      | -0.21182 | 0.349389 | -0.86732 | 0.396124 | 0.521898 | -6.12244 |
| PSENEN    | 0.161011 | 0.011846 | 0.866802 | 0.3964   | 0.522155 | -6.12288 |
| PLAGL2    | 0.265825 | 0.277059 | 0.866716 | 0.396446 | 0.522181 | -6.12296 |
| ZBED4     | 0.34226  | 0.200482 | 0.866355 | 0.396639 | 0.5224   | -6.12326 |
| DUOX1     | 0.243835 | -0.26256 | 0.726431 | 0.476985 | 0.598607 | -6.12328 |
| ACCN2     | 0.33116  | 0.317421 | 0.865913 | 0.396876 | 0.522677 | -6.12364 |
| NPHS1     | 0.119575 | -0.04852 | 0.853446 | 0.404119 | 0.529617 | -6.12382 |
| RPS14     | 0.294295 | -0.17751 | 0.86555  | 0.39707  | 0.522897 | -6.12395 |
| ZNF879    | -0.40631 | 0.080393 | -0.80407 | 0.43137  | 0.555851 | -6.12411 |
| RRP12     | -0.22995 | 0.252052 | -0.86522 | 0.397246 | 0.523059 | -6.12424 |
| NDN       | -0.36361 | 0.455185 | -0.86444 | 0.397664 | 0.523539 | -6.1249  |

|           |          |          |          |          |          |          |
|-----------|----------|----------|----------|----------|----------|----------|
| OR10T2    | 0.277282 | -0.27418 | 0.864245 | 0.397769 | 0.523607 | -6.12507 |
| MMEL1     | 0.154581 | -0.1717  | 0.864034 | 0.397882 | 0.52372  | -6.12525 |
| ALG1      | 0.186142 | 0.073435 | 0.863986 | 0.397908 | 0.52372  | -6.12529 |
| C20orf29  | -0.19263 | 0.365524 | -0.86363 | 0.3981   | 0.523901 | -6.1256  |
| SEMA6A    | 0.308835 | 0.106736 | 0.863417 | 0.398214 | 0.523948 | -6.12578 |
| ARCN1     | -0.17002 | 0.084103 | -0.86341 | 0.398215 | 0.523948 | -6.12578 |
| AGMAT     | -0.34957 | 0.548963 | -0.86312 | 0.398374 | 0.524096 | -6.12603 |
| TSTD2     | -0.26306 | 0.04734  | -0.8631  | 0.398382 | 0.524096 | -6.12605 |
| RPL12     | 0.248154 | -0.02794 | 0.862891 | 0.398496 | 0.524211 | -6.12623 |
| HIST1H4G  | -0.17451 | -0.10628 | -0.85031 | 0.405815 | 0.531256 | -6.12646 |
| COL25A1   | 0.342837 | -0.08407 | 0.850205 | 0.405873 | 0.531256 | -6.12655 |
| TGFB2     | -0.23039 | 0.176122 | -0.8625  | 0.398704 | 0.524449 | -6.12656 |
| GLYCTK    | -0.13089 | 0.086016 | -0.86227 | 0.39883  | 0.52458  | -6.12676 |
| CTNND1    | 0.35732  | 0.335461 | 0.861831 | 0.399065 | 0.524834 | -6.12713 |
| FGD1      | 0.098298 | -0.09101 | 0.86181  | 0.399076 | 0.524834 | -6.12715 |
| RYR2      | 0.225762 | -0.04644 | 0.834793 | 0.414859 | 0.539757 | -6.12732 |
| LOC401098 | -0.26736 | 0.018649 | -0.86142 | 0.399284 | 0.525072 | -6.12748 |
| ATF3      | -0.39831 | 0.570769 | -0.86114 | 0.399435 | 0.525235 | -6.12772 |
| TNFRSF17  | 0.483846 | -0.00349 | 0.860933 | 0.399548 | 0.525339 | -6.1279  |
| TSSC4     | 0.140607 | 0.09658  | 0.860896 | 0.399567 | 0.525339 | -6.12793 |
| SDK2      | 0.291055 | 0.055769 | 0.860524 | 0.399767 | 0.525531 | -6.12825 |
| ARR3      | 0.142993 | -0.20135 | 0.772344 | 0.450599 | 0.573799 | -6.12831 |
| GRAP2     | -0.27929 | 0.431033 | -0.86045 | 0.399808 | 0.525549 | -6.12831 |
| TNNI3K    | 0.323956 | 0.090699 | 0.860309 | 0.399883 | 0.525596 | -6.12843 |
| PCMTD1    | -0.20347 | 0.012747 | -0.86028 | 0.399897 | 0.525596 | -6.12845 |
| KDELC1    | -0.29264 | 0.450006 | -0.86005 | 0.400021 | 0.5257   | -6.12865 |
| MMS19     | -0.13245 | 0.191576 | -0.86004 | 0.40003  | 0.5257   | -6.12866 |
| YBEY      | 0.211673 | -0.24797 | 0.859885 | 0.400111 | 0.525771 | -6.12879 |
| NFAT5     | 0.224859 | -0.5003  | 0.859504 | 0.400316 | 0.526006 | -6.12911 |
| FANCA     | -0.30212 | 0.631087 | -0.85938 | 0.400382 | 0.52605  | -6.12922 |
| ZNF775    | 0.140605 | -0.02507 | 0.859342 | 0.400404 | 0.52605  | -6.12925 |
| PHKA1     | -0.37393 | 0.192604 | -0.85921 | 0.400472 | 0.526105 | -6.12936 |
| ADAMTS19  | -0.11854 | 0.116744 | -0.84677 | 0.407737 | 0.53311  | -6.12944 |
| SLC46A3   | -0.12697 | 0.030699 | -0.85905 | 0.400563 | 0.526189 | -6.1295  |
| POLR3B    | -0.13057 | 0.090028 | -0.85876 | 0.400716 | 0.526319 | -6.12974 |
| C12orf28  | -0.34763 | 0.188126 | -0.85854 | 0.400835 | 0.526415 | -6.12993 |
| THTPA     | -0.15069 | 0.328459 | -0.85853 | 0.400842 | 0.526415 | -6.12994 |
| JUN       | -0.20821 | 0.486449 | -0.85833 | 0.40095  | 0.52652  | -6.13011 |
| LOC100506 | 0.260812 | -0.40795 | 0.796415 | 0.4357   | 0.56003  | -6.13019 |
| NOSIP     | 0.283787 | -0.07205 | 0.858189 | 0.401025 | 0.526583 | -6.13023 |
| PIK3R1    | -0.26228 | 0.067349 | -0.85803 | 0.401109 | 0.526659 | -6.13036 |
| NDUFA4    | -0.40519 | -0.79204 | -0.85777 | 0.401249 | 0.52677  | -6.13058 |
| WNK3      | -0.11148 | 0.05056  | -0.85773 | 0.401275 | 0.52677  | -6.13062 |
| SLC12A4   | 0.092626 | 0.2261   | 0.857231 | 0.401541 | 0.52705  | -6.13104 |
| GFOD2     | -0.19681 | 0.148784 | -0.85688 | 0.40173  | 0.527227 | -6.13134 |
| MYEF2     | -0.29633 | 0.161633 | -0.85667 | 0.401845 | 0.527342 | -6.13152 |
| HSPA4L    | 0.23536  | 0.087656 | 0.856551 | 0.401908 | 0.52739  | -6.13162 |

|           |          |          |          |          |          |          |
|-----------|----------|----------|----------|----------|----------|----------|
| HSPA5     | -0.32173 | 0.48659  | -0.85648 | 0.401945 | 0.527403 | -6.13168 |
| ATP6V1F   | 0.134477 | -0.12254 | 0.85634  | 0.402022 | 0.527469 | -6.1318  |
| C21orf67  | 0.168422 | -0.052   | 0.856284 | 0.402052 | 0.527473 | -6.13185 |
| CLC       | 0.635093 | -0.65376 | 0.855898 | 0.40226  | 0.527709 | -6.13217 |
| LINC00320 | 0.34968  | 0.259175 | 0.855849 | 0.402287 | 0.527709 | -6.13222 |
| CTU1      | 0.123558 | 0.18532  | 0.855801 | 0.402313 | 0.527709 | -6.13226 |
| LOC439938 | 0.129331 | -0.04825 | 0.855517 | 0.402466 | 0.527875 | -6.1325  |
| GABPA     | -0.35362 | 0.054281 | -0.84308 | 0.409746 | 0.535094 | -6.13253 |
| HS3ST4    | -0.17569 | -0.03099 | -0.8554  | 0.40253  | 0.527923 | -6.1326  |
| SHOX      | 0.259963 | -0.65594 | 0.618674 | 0.547825 | 0.661536 | -6.13284 |
| ZNF320    | -0.37819 | 0.468042 | -0.85495 | 0.402775 | 0.528209 | -6.13298 |
| LOC729058 | -0.25679 | 0.021529 | -0.8547  | 0.402909 | 0.528334 | -6.13319 |
| UNK       | 0.269663 | 0.18529  | 0.85467  | 0.402924 | 0.528334 | -6.13321 |
| ABCB6     | 0.16688  | 0.455571 | 0.854074 | 0.403246 | 0.528686 | -6.13372 |
| AVEN      | 0.207155 | 0.004981 | 0.853913 | 0.403333 | 0.528733 | -6.13385 |
| HCRTR2    | -0.49977 | 0.29969  | -0.85391 | 0.403337 | 0.528733 | -6.13386 |
| NCOA6     | 0.196491 | -0.13534 | 0.853175 | 0.403732 | 0.529217 | -6.13448 |
| LOC572558 | 0.16691  | -0.39443 | 0.853014 | 0.40382  | 0.529296 | -6.13461 |
| TEKT4P2   | -0.05444 | 0.008307 | -0.79075 | 0.438921 | 0.563073 | -6.13466 |
| LOC338798 | -0.15513 | 0.246875 | -0.85279 | 0.403941 | 0.52942  | -6.1348  |
| PAQR8     | 0.232991 | -0.19969 | 0.85197  | 0.404385 | 0.529931 | -6.13549 |
| HTR3D     | 0.130449 | -0.04453 | 0.777386 | 0.447104 | 0.570571 | -6.13553 |
| ZNF419    | -0.1903  | 0.033381 | -0.85185 | 0.404451 | 0.529981 | -6.1356  |
| VHLL      | -0.30306 | 0.141172 | -0.83894 | 0.412006 | 0.537145 | -6.13598 |
| RG9MTD3   | 0.256191 | 0.022246 | 0.838923 | 0.412017 | 0.537145 | -6.136   |
| KCNH7     | 0.205797 | -0.06106 | 0.851374 | 0.404708 | 0.530234 | -6.136   |
| LAG3      | 0.360353 | -0.20625 | 0.851299 | 0.404749 | 0.530234 | -6.13606 |
| PTPN11    | -0.18334 | -0.34892 | -0.85129 | 0.404753 | 0.530234 | -6.13607 |
| CRABP1    | -0.1702  | -0.03746 | -0.85124 | 0.404783 | 0.530234 | -6.13611 |
| METTTL21B | -0.21674 | 0.005786 | -0.85079 | 0.405027 | 0.530487 | -6.13649 |
| KCNJ11    | -0.12146 | 0.048753 | -0.83826 | 0.412379 | 0.537495 | -6.13655 |
| ZNF333    | -0.23163 | 0.423533 | -0.85065 | 0.405099 | 0.530547 | -6.1366  |
| C18orf55  | -0.20341 | 0.19187  | -0.84961 | 0.405667 | 0.531183 | -6.13748 |
| WDPCP     | -0.18379 | -0.02267 | -0.84953 | 0.40571  | 0.531205 | -6.13755 |
| IPCEF1    | 0.152057 | -0.13305 | 0.836989 | 0.413077 | 0.537974 | -6.1376  |
| WDR91     | -0.16488 | -0.00527 | -0.84929 | 0.405839 | 0.531256 | -6.13775 |
| NEUROD4   | -0.38269 | 0.423642 | -0.84921 | 0.405882 | 0.531256 | -6.13782 |
| TRIM66    | 0.179742 | -0.03496 | 0.849207 | 0.405884 | 0.531256 | -6.13782 |
| ECE2      | 0.175556 | 0.070707 | 0.849037 | 0.405977 | 0.531341 | -6.13797 |
| TPT1      | -0.29781 | -0.56012 | -0.84889 | 0.406057 | 0.531411 | -6.13809 |
| FLT1      | 0.079064 | -0.03663 | 0.835946 | 0.413648 | 0.538576 | -6.13847 |
| PPPDE2    | -0.29637 | 0.620152 | -0.84819 | 0.406438 | 0.531838 | -6.13868 |
| IL17C     | -0.14351 | 0.093135 | -0.8355  | 0.413895 | 0.538861 | -6.13884 |
| GPR19     | -0.21538 | 0.024244 | -0.84781 | 0.406646 | 0.532053 | -6.139   |
| LOC100658 | 0.127119 | -0.09197 | 0.847786 | 0.406656 | 0.532053 | -6.13902 |
| CCDC138   | -0.14969 | -0.07827 | -0.83522 | 0.414046 | 0.539022 | -6.13907 |
| ZBP1      | -0.29775 | 0.369957 | -0.84766 | 0.406724 | 0.532105 | -6.13912 |

|           |          |          |          |          |          |          |
|-----------|----------|----------|----------|----------|----------|----------|
| CDKAL1    | -0.15284 | 0.061918 | -0.84758 | 0.406768 | 0.532127 | -6.13919 |
| CIT       | -0.31918 | 0.341229 | -0.78474 | 0.44235  | 0.566018 | -6.13937 |
| ZSWIM7    | -0.18758 | 0.111935 | -0.84732 | 0.406913 | 0.532268 | -6.13941 |
| MLPH      | -0.16533 | 0.00058  | -0.84725 | 0.406946 | 0.532268 | -6.13946 |
| Sep-11    | 0.150841 | -0.04122 | 0.847234 | 0.406957 | 0.532268 | -6.13948 |
| RPS8      | 0.303967 | -0.23956 | 0.847089 | 0.407036 | 0.532315 | -6.1396  |
| HSP90AB1  | 0.356773 | 0.508691 | 0.847068 | 0.407047 | 0.532315 | -6.13962 |
| NUTF2     | 0.25203  | 0.268289 | 0.846621 | 0.40729  | 0.532597 | -6.13999 |
| CLDN18    | 0.169026 | -0.17122 | 0.84644  | 0.407389 | 0.532691 | -6.14015 |
| CAPN7     | 0.214503 | -0.42934 | 0.845518 | 0.407891 | 0.533276 | -6.14092 |
| SOBP      | -0.50591 | -0.11118 | -0.8327  | 0.415429 | 0.540392 | -6.14115 |
| UBE2O     | 0.143469 | -0.14575 | 0.845078 | 0.408131 | 0.533519 | -6.14129 |
| PNCK      | -0.34852 | 0.067733 | -0.78225 | 0.443776 | 0.567396 | -6.1413  |
| LOC100128 | -0.11521 | -0.52825 | -0.77809 | 0.447963 | 0.57137  | -6.14156 |
| C20orf197 | -0.193   | 0.154013 | -0.84444 | 0.408479 | 0.533938 | -6.14182 |
| ST8SIA5   | 0.111644 | -0.12787 | 0.844218 | 0.4086   | 0.534061 | -6.14201 |
| CLEC4F    | -0.20151 | 0.016    | -0.84407 | 0.40868  | 0.53413  | -6.14213 |
| EXO1      | -0.41616 | 0.715746 | -0.84395 | 0.408744 | 0.534177 | -6.14223 |
| PKHD1L1   | 0.177115 | -0.00568 | 0.768604 | 0.45217  | 0.57525  | -6.14229 |
| TRIM13    | -0.13841 | -0.08366 | -0.84356 | 0.408958 | 0.534394 | -6.14256 |
| MRPL18    | -0.13978 | 0.244256 | -0.84355 | 0.408964 | 0.534394 | -6.14256 |
| CHCHD5    | -0.14289 | 0.012214 | -0.84341 | 0.409041 | 0.534418 | -6.14268 |
| SAMD4A    | -0.29491 | 0.105975 | -0.8434  | 0.409048 | 0.534418 | -6.14269 |
| RAB4A     | -0.22824 | 0.072959 | -0.83082 | 0.416469 | 0.541385 | -6.14271 |
| FRMD5     | -0.17983 | 0.035811 | -0.84332 | 0.40909  | 0.534418 | -6.14276 |
| GATAD2B   | 0.148876 | 0.115498 | 0.843317 | 0.409092 | 0.534418 | -6.14276 |
| HMGN2P4   | -0.16976 | 0.050893 | -0.84279 | 0.409381 | 0.534725 | -6.1432  |
| ZBTB5     | 0.188809 | -0.16184 | 0.842415 | 0.409584 | 0.534919 | -6.14351 |
| ANTXR1    | -0.43504 | 0.365361 | -0.84196 | 0.409835 | 0.535176 | -6.1439  |
| KLK11     | -0.26661 | -0.08969 | -0.82928 | 0.417317 | 0.542127 | -6.14398 |
| RAB9B     | -0.20169 | -0.14892 | -0.84182 | 0.409908 | 0.535235 | -6.14401 |
| ATP6V0A1  | -0.15855 | 0.085657 | -0.84167 | 0.409992 | 0.535309 | -6.14414 |
| KBTBD6    | -0.15024 | 0.030049 | -0.84154 | 0.410064 | 0.535367 | -6.14425 |
| DOPEY2    | -0.2859  | 0.320913 | -0.82863 | 0.417674 | 0.542447 | -6.14451 |
| MCCC1     | 0.174342 | 0.013568 | 0.840575 | 0.41059  | 0.535958 | -6.14505 |
| C4orf17   | -0.12561 | 0.095066 | -0.84055 | 0.410604 | 0.535958 | -6.14507 |
| MMD       | 0.329137 | -0.14653 | 0.840532 | 0.410614 | 0.535958 | -6.14508 |
| MEGF9     | -0.36212 | 0.040867 | -0.84049 | 0.410636 | 0.535958 | -6.14512 |
| MRPL32    | -0.28656 | -0.20069 | -0.84046 | 0.410653 | 0.535958 | -6.14514 |
| CARNS1    | 0.305048 | 0.076002 | 0.840327 | 0.410725 | 0.536017 | -6.14525 |
| PLAC1L    | 0.149494 | -0.0615  | 0.764566 | 0.454511 | 0.577243 | -6.14537 |
| C22orf46  | 0.187387 | -0.20791 | 0.840146 | 0.410825 | 0.536111 | -6.1454  |
| TBL1Y     | -0.27743 | 0.58849  | -0.83992 | 0.410946 | 0.536234 | -6.14559 |
| CTSE      | 0.274795 | 0.4231   | 0.839561 | 0.411145 | 0.536414 | -6.14589 |
| MRPL27    | -0.17136 | 0.064485 | -0.83956 | 0.411148 | 0.536414 | -6.1459  |
| RAB15     | -0.33888 | 0.587385 | -0.83952 | 0.411167 | 0.536414 | -6.14593 |
| NDUFS6    | -0.15194 | 0.092365 | -0.83916 | 0.411362 | 0.536633 | -6.14622 |

|           |          |          |          |          |          |          |
|-----------|----------|----------|----------|----------|----------|----------|
| PARD3     | 0.286459 | 0.035086 | 0.838953 | 0.411478 | 0.536749 | -6.1464  |
| WDR36     | -0.17757 | -0.12114 | -0.83884 | 0.411537 | 0.53679  | -6.14649 |
| ZFP14     | 0.377653 | -0.31424 | 0.811257 | 0.427895 | 0.552512 | -6.14656 |
| TATDN1    | -0.30506 | 0.183758 | -0.83867 | 0.411635 | 0.536873 | -6.14664 |
| ANKRD20A  | -0.35803 | 0.332311 | -0.83858 | 0.411683 | 0.536873 | -6.14671 |
| MS4A6E    | -0.23672 | 0.192082 | -0.748   | 0.464763 | 0.58665  | -6.14676 |
| AGPAT3    | -0.26359 | 0.529998 | -0.83839 | 0.411785 | 0.53697  | -6.14686 |
| SSSCA1    | 0.199167 | -0.06525 | 0.838275 | 0.41185  | 0.537019 | -6.14696 |
| MX1       | 0.532826 | 0.029552 | 0.837949 | 0.412029 | 0.537145 | -6.14723 |
| NT5C1B    | -0.15903 | -0.1171  | -0.82521 | 0.419567 | 0.544473 | -6.14732 |
| PDE4B     | -0.47085 | 0.52271  | -0.83783 | 0.412094 | 0.537194 | -6.14733 |
| OTUD4     | 0.17632  | -0.22145 | 0.774455 | 0.44826  | 0.571674 | -6.14734 |
| POU6F2    | -0.12927 | 0.031693 | -0.83776 | 0.41213  | 0.537206 | -6.14739 |
| ZFAND1    | 0.21827  | -0.67301 | 0.837061 | 0.412516 | 0.53763  | -6.14797 |
| RFX1      | -0.22805 | 0.559383 | -0.83697 | 0.412563 | 0.53763  | -6.14804 |
| SEC23IP   | -0.14702 | -0.2858  | -0.83691 | 0.412598 | 0.53763  | -6.14809 |
| MT1F      | 0.207123 | 0.032683 | 0.836899 | 0.412605 | 0.53763  | -6.1481  |
| UGGT1     | -0.19605 | 0.441877 | -0.83687 | 0.41262  | 0.53763  | -6.14813 |
| GPR50     | -0.1387  | -0.05866 | -0.8367  | 0.412714 | 0.537692 | -6.14827 |
| TEDDM1    | -0.1998  | 0.004558 | -0.83668 | 0.412722 | 0.537692 | -6.14828 |
| IVL       | 0.127117 | -0.15086 | 0.836304 | 0.412931 | 0.537918 | -6.1486  |
| AUTS2     | -0.05599 | 0.011197 | -0.83627 | 0.412951 | 0.537918 | -6.14863 |
| TRPM7     | -0.35258 | 0.382636 | -0.83612 | 0.413034 | 0.537962 | -6.14875 |
| CENPT     | -0.19994 | 0.528218 | -0.83611 | 0.41304  | 0.537962 | -6.14876 |
| RABGAP1   | -0.12739 | -0.13971 | -0.83596 | 0.413118 | 0.537992 | -6.14888 |
| ENKUR     | 0.108053 | -0.08538 | 0.835558 | 0.413341 | 0.538247 | -6.14921 |
| HS2ST1    | -0.13395 | 0.041294 | -0.83531 | 0.413475 | 0.538386 | -6.14942 |
| CDKL5     | 0.410212 | 0.302009 | 0.771579 | 0.449921 | 0.57309  | -6.14955 |
| ECT2L     | 0.089451 | -0.01789 | 0.834027 | 0.414183 | 0.539129 | -6.15048 |
| SLAIN1    | 0.210008 | -0.01548 | 0.770245 | 0.450693 | 0.573844 | -6.15057 |
| TMTC1     | 0.263056 | -0.2909  | 0.757612 | 0.45856  | 0.581067 | -6.15064 |
| GATAD2A   | 0.391249 | 0.414238 | 0.833774 | 0.414322 | 0.539274 | -6.15069 |
| CNPY4     | -0.12577 | 0.132446 | -0.83329 | 0.414586 | 0.539518 | -6.15109 |
| CCNT1     | -0.17214 | 0.297565 | -0.83327 | 0.414598 | 0.539518 | -6.15111 |
| CUZD1     | -0.28174 | 0.115063 | -0.83326 | 0.414602 | 0.539518 | -6.15111 |
| NDUFB2    | 0.283103 | -0.39722 | 0.833232 | 0.41462  | 0.539518 | -6.15114 |
| SMAD5-AS  | -0.12539 | 0.113177 | -0.76916 | 0.451321 | 0.574361 | -6.1514  |
| LOC100005 | -0.18742 | 0.292976 | -0.83285 | 0.414828 | 0.539754 | -6.15145 |
| ASPA      | -0.20027 | -0.01439 | -0.83266 | 0.414933 | 0.539818 | -6.15161 |
| NAP1L2    | -0.11961 | -0.56214 | -0.23955 | 0.815136 | 0.878487 | -6.15187 |
| RNF133    | -0.17313 | 0.008557 | -0.81942 | 0.42278  | 0.547881 | -6.15205 |
| PRSS16    | -0.2038  | -0.04794 | -0.81923 | 0.422884 | 0.547979 | -6.1522  |
| LCE3A     | 0.194644 | -0.12541 | 0.819125 | 0.422943 | 0.547983 | -6.15228 |
| TSPAN6    | -0.2195  | -0.03529 | -0.63959 | 0.532172 | 0.647985 | -6.15233 |
| PAPPA     | 0.135754 | -0.16057 | 0.831681 | 0.415475 | 0.540416 | -6.15242 |
| TMEM159   | -0.22595 | 0.567485 | -0.83147 | 0.415591 | 0.54053  | -6.15259 |
| MNX1      | -0.23932 | 0.226307 | -0.83139 | 0.415636 | 0.540545 | -6.15266 |

|           |          |          |          |          |          |          |
|-----------|----------|----------|----------|----------|----------|----------|
| SET       | -0.38176 | 0.65634  | -0.83135 | 0.415658 | 0.540545 | -6.15269 |
| GAF3      | 0.353315 | 0.069625 | 0.831221 | 0.415729 | 0.540602 | -6.1528  |
| MYH3      | -0.15904 | 0.254785 | -0.83101 | 0.415844 | 0.540716 | -6.15297 |
| AQP8      | 0.14273  | -0.20559 | 0.830759 | 0.415983 | 0.540861 | -6.15318 |
| GNG4      | 0.155209 | -0.22158 | 0.830355 | 0.416206 | 0.541115 | -6.15351 |
| POPDC2    | -0.30117 | 0.15219  | -0.82997 | 0.416417 | 0.541353 | -6.15383 |
| ISOC1     | 0.208553 | -0.19231 | 0.829819 | 0.416502 | 0.541392 | -6.15395 |
| SPAG16    | -0.39694 | -0.12824 | -0.82958 | 0.416637 | 0.541531 | -6.15415 |
| C8orf77   | -0.2869  | 0.056137 | -0.82946 | 0.416703 | 0.541581 | -6.15425 |
| TCF3      | 0.267683 | 0.256678 | 0.829291 | 0.416794 | 0.541664 | -6.15439 |
| PTPRD     | -0.25196 | -0.27692 | -0.7613  | 0.457647 | 0.580359 | -6.15447 |
| ZNF322    | -0.20859 | -0.22251 | -0.82895 | 0.416985 | 0.541876 | -6.15467 |
| SRPK2     | -0.28208 | 0.323074 | -0.82885 | 0.41704  | 0.54189  | -6.15476 |
| NR2C2     | 0.116896 | -0.29682 | 0.828826 | 0.417051 | 0.54189  | -6.15477 |
| LOC100128 | 0.138509 | -0.13418 | 0.82841  | 0.417281 | 0.542116 | -6.15511 |
| CBLN2     | -0.18849 | 0.163372 | -0.82824 | 0.417376 | 0.542168 | -6.15525 |
| GCM2      | 0.360553 | -0.15481 | 0.764039 | 0.454295 | 0.57708  | -6.15531 |
| C6orf103  | 0.258801 | 0.009992 | 0.827925 | 0.417549 | 0.542357 | -6.15551 |
| C6orf132  | 0.295501 | -0.46584 | 0.459968 | 0.653854 | 0.751804 | -6.15564 |
| SULT4A1   | -0.13998 | -0.06327 | -0.82772 | 0.417662 | 0.542447 | -6.15568 |
| PRAMEF8   | 0.228009 | -0.43355 | 0.799823 | 0.43432  | 0.558745 | -6.15572 |
| ZNF74     | 0.199784 | 0.150499 | 0.827023 | 0.418048 | 0.542897 | -6.15625 |
| HSPB11    | -0.25515 | -0.30069 | -0.82697 | 0.418076 | 0.542898 | -6.15629 |
| DPY19L2   | 0.084474 | 0.031822 | 0.826763 | 0.418192 | 0.543004 | -6.15647 |
| KRT8P41   | -0.18818 | 0.055935 | -0.82672 | 0.418214 | 0.543004 | -6.1565  |
| SPINK6    | 0.201867 | -0.07899 | 0.813893 | 0.425861 | 0.550634 | -6.15653 |
| LOC100507 | 0.191323 | 0.11692  | 0.749689 | 0.463201 | 0.58547  | -6.1566  |
| Mar-06    | -0.19437 | -0.13307 | -0.82628 | 0.418459 | 0.54326  | -6.15686 |
| NOTCH2NL  | -0.27802 | -0.01577 | -0.82627 | 0.418466 | 0.54326  | -6.15687 |
| CELA3B    | -0.17855 | -0.13116 | -0.76182 | 0.45559  | 0.578349 | -6.157   |
| POSTN     | 0.242678 | 0.093017 | 0.761677 | 0.45567  | 0.578414 | -6.15711 |
| SKIL      | 0.331621 | 0.198973 | 0.825868 | 0.418687 | 0.543512 | -6.1572  |
| FERD3L    | 0.109695 | -0.08683 | 0.797803 | 0.435462 | 0.559798 | -6.15732 |
| ZNF442    | 0.125628 | -0.08417 | 0.825099 | 0.419114 | 0.543993 | -6.15783 |
| C14orf182 | 0.196247 | 0.172516 | 0.824816 | 0.419271 | 0.54416  | -6.15806 |
| OSBPL1A   | -0.23015 | 0.279201 | -0.82418 | 0.419622 | 0.544509 | -6.15858 |
| TMEM135   | 0.385773 | -0.03857 | 0.823729 | 0.419874 | 0.544799 | -6.15895 |
| B3GAT3    | -0.13307 | 0.167779 | -0.82355 | 0.419972 | 0.54489  | -6.15909 |
| RPS27L    | 0.397622 | -1.23237 | 0.823158 | 0.420191 | 0.545138 | -6.15942 |
| RAD21     | -0.22634 | -0.16252 | -0.82298 | 0.420291 | 0.545232 | -6.15956 |
| CCL19     | 0.184948 | -0.49929 | 0.822871 | 0.42035  | 0.545272 | -6.15965 |
| NT5C      | -0.15516 | 0.041197 | -0.82214 | 0.420757 | 0.545765 | -6.16025 |
| LENG1     | -0.12552 | 0.204312 | -0.82205 | 0.420805 | 0.54579  | -6.16032 |
| FAM24B    | -0.26188 | 0.081043 | -0.8216  | 0.421054 | 0.546078 | -6.16069 |
| LOC100289 | 0.174074 | -0.48945 | 0.752557 | 0.462737 | 0.584997 | -6.16109 |
| CYP4F11   | 0.170521 | -0.12397 | 0.820985 | 0.421398 | 0.546451 | -6.16119 |
| LRRC19    | 0.123597 | -0.17178 | 0.820643 | 0.421589 | 0.546662 | -6.16147 |

|           |          |          |          |          |          |          |
|-----------|----------|----------|----------|----------|----------|----------|
| CA6       | 0.211932 | 0.056395 | 0.82032  | 0.421768 | 0.546859 | -6.16173 |
| OR10P1    | 0.159906 | -0.25579 | 0.820179 | 0.421847 | 0.546925 | -6.16185 |
| OST4      | 0.196456 | 0.23089  | 0.820113 | 0.421883 | 0.546936 | -6.1619  |
| SLC17A4   | -0.16296 | 0.116771 | -0.80689 | 0.429787 | 0.554285 | -6.16217 |
| RAD54L2   | 0.139327 | -0.07367 | 0.819488 | 0.422232 | 0.547351 | -6.16241 |
| PLEK      | -0.4287  | 0.175371 | -0.81914 | 0.422427 | 0.547568 | -6.16269 |
| GTF2A1    | -0.05438 | 0.010876 | -0.81899 | 0.422511 | 0.547604 | -6.16282 |
| OSGEPL1   | -0.34354 | 0.331066 | -0.81892 | 0.42255  | 0.547619 | -6.16287 |
| TTPAL     | 0.127629 | -0.13968 | 0.818241 | 0.422926 | 0.547983 | -6.16342 |
| LRRTM4    | 0.253231 | -0.20523 | 0.818008 | 0.423057 | 0.548094 | -6.16361 |
| SDS       | -0.08996 | 0.169114 | -0.81793 | 0.423101 | 0.548115 | -6.16368 |
| LINC00116 | 0.254794 | 0.012944 | 0.817751 | 0.4232   | 0.548171 | -6.16382 |
| SMARCA2   | -0.18509 | 0.280024 | -0.81759 | 0.42329  | 0.548251 | -6.16395 |
| CCDC111   | -0.15634 | -0.10694 | -0.81745 | 0.42337  | 0.548318 | -6.16407 |
| NARS      | -0.22343 | 0.335894 | -0.80438 | 0.4312   | 0.555705 | -6.16418 |
| SLC50A1   | -0.1442  | 0.179368 | -0.81709 | 0.423568 | 0.548515 | -6.16436 |
| GFI1      | 0.293758 | -0.04879 | 0.817073 | 0.423578 | 0.548515 | -6.16437 |
| NAA20     | -0.14235 | -0.48448 | -0.73903 | 0.469487 | 0.591204 | -6.16451 |
| SFR1      | 0.350976 | -0.02318 | 0.803956 | 0.431437 | 0.555864 | -6.16452 |
| ADAL      | -0.22641 | 0.154256 | -0.81679 | 0.423737 | 0.548632 | -6.1646  |
| MED13L    | 0.204591 | -0.28624 | 0.816761 | 0.423752 | 0.548632 | -6.16462 |
| SSX2      | -0.16512 | -0.14304 | -0.81665 | 0.423816 | 0.548678 | -6.16472 |
| SFI1      | 0.180903 | 0.164964 | 0.816521 | 0.423886 | 0.548733 | -6.16482 |
| COL5A1    | -0.3459  | 0.253854 | -0.81642 | 0.423942 | 0.548769 | -6.1649  |
| C9orf41   | 0.299399 | 0.09351  | 0.7882   | 0.440914 | 0.564916 | -6.1649  |
| CUL1      | -0.31658 | 0.449938 | -0.81618 | 0.424078 | 0.548886 | -6.1651  |
| PHKG1     | -0.11793 | 0.045654 | -0.81616 | 0.424089 | 0.548886 | -6.16511 |
| C3orf64   | 0.085413 | -0.06823 | 0.816077 | 0.424134 | 0.548909 | -6.16518 |
| KDM5A     | -0.17526 | 0.30503  | -0.81591 | 0.424229 | 0.54896  | -6.16532 |
| ZHX3      | 0.166078 | 0.006798 | 0.815628 | 0.424385 | 0.549089 | -6.16554 |
| MPZ       | 0.193478 | -0.08468 | 0.802622 | 0.432189 | 0.55665  | -6.16558 |
| MBNL2     | -0.38284 | 0.309492 | -0.81526 | 0.424592 | 0.549317 | -6.16584 |
| PLAU      | -0.27359 | 0.234149 | -0.81516 | 0.424645 | 0.549317 | -6.16592 |
| LOC643351 | 0.324024 | 0.206347 | 0.544794 | 0.593027 | 0.701761 | -6.16624 |
| L1TD1     | -0.32238 | 0.612509 | -0.81392 | 0.425342 | 0.550117 | -6.16693 |
| CCL3      | 0.303369 | -0.24211 | 0.813911 | 0.425345 | 0.550117 | -6.16693 |
| GIMAP6    | 0.248672 | -0.10484 | 0.813905 | 0.425348 | 0.550117 | -6.16694 |
| CTNNAL1   | 0.261117 | -0.27832 | 0.813397 | 0.425633 | 0.550449 | -6.16735 |
| IGFN1     | 0.126798 | -0.18769 | 0.813189 | 0.425749 | 0.550528 | -6.16752 |
| MCOLN2    | 0.244618 | -0.27604 | 0.813187 | 0.425751 | 0.550528 | -6.16752 |
| ZNF25     | 0.190905 | 0.041726 | 0.747595 | 0.463922 | 0.586031 | -6.1677  |
| LOC286149 | -0.30775 | 0.317088 | -0.79979 | 0.43379  | 0.55826  | -6.16784 |
| OR5A1     | -0.15514 | -0.09738 | -0.81269 | 0.426031 | 0.550818 | -6.16792 |
| TEAD4     | -0.18407 | 0.218137 | -0.81251 | 0.42613  | 0.550909 | -6.16806 |
| LRIF1     | 0.225782 | 0.048407 | 0.784081 | 0.443265 | 0.566965 | -6.16813 |
| LOC730227 | 0.284897 | 0.076439 | 0.812323 | 0.426235 | 0.551009 | -6.16821 |
| NTRK1     | 0.223773 | 0.072238 | 0.733692 | 0.472656 | 0.59443  | -6.16844 |



|           |          |          |          |          |          |          |
|-----------|----------|----------|----------|----------|----------|----------|
| ASB17     | -0.40271 | 0.395915 | -0.79892 | 0.434278 | 0.558745 | -6.16853 |
| MXRA7     | -0.22276 | -0.19101 | -0.81192 | 0.426462 | 0.551266 | -6.16854 |
| BBOX1     | -0.20451 | -0.1607  | -0.74566 | 0.465063 | 0.586961 | -6.16914 |
| CHD5      | 0.153293 | -0.01036 | 0.797997 | 0.434803 | 0.559155 | -6.16926 |
| EIF2D     | -0.20298 | 0.166301 | -0.81071 | 0.42714  | 0.55207  | -6.16952 |
| PRKAA2    | 0.352891 | 0.181864 | 0.8106   | 0.427201 | 0.552107 | -6.1696  |
| SPATA7    | -0.21647 | 0.158785 | -0.81056 | 0.427225 | 0.552107 | -6.16964 |
| LOC154822 | -0.11014 | -0.02635 | -0.81035 | 0.427341 | 0.55222  | -6.1698  |
| PHF21B    | -0.16301 | 0.035315 | -0.79729 | 0.435206 | 0.559505 | -6.16983 |
| TBC1D25   | -0.32752 | 0.221237 | -0.81023 | 0.427405 | 0.552266 | -6.1699  |
| FAM118A   | 0.269302 | -0.04776 | 0.810187 | 0.427432 | 0.552266 | -6.16994 |
| CCL7      | -0.31874 | 0.048751 | -0.78171 | 0.444624 | 0.568258 | -6.16998 |
| GEMIN8P4  | -0.15353 | 0.206331 | -0.80998 | 0.42755  | 0.552368 | -6.1701  |
| ZNF280C   | 0.175682 | -0.45819 | 0.809935 | 0.427574 | 0.552368 | -6.17014 |
| C12orf70  | -0.12301 | -0.05226 | -0.80989 | 0.427596 | 0.552368 | -6.17017 |
| CCL23     | -0.41286 | 0.313928 | -0.80977 | 0.427667 | 0.552391 | -6.17027 |
| KIF26A    | -0.1782  | -0.15446 | -0.80976 | 0.42767  | 0.552391 | -6.17028 |
| CNNM4     | -0.1332  | 0.147769 | -0.80963 | 0.427746 | 0.552452 | -6.17039 |
| ANXA6     | 0.213837 | -0.33424 | 0.809529 | 0.427802 | 0.552453 | -6.17047 |
| PXMP2     | 0.260726 | -0.15952 | 0.809527 | 0.427803 | 0.552453 | -6.17047 |
| NEK3      | 0.260974 | 0.144382 | 0.809314 | 0.427922 | 0.552512 | -6.17064 |
| MSI2      | 0.156346 | 0.02597  | 0.809295 | 0.427933 | 0.552512 | -6.17065 |
| CXXC5     | 0.230946 | 0.390284 | 0.809176 | 0.428    | 0.552562 | -6.17075 |
| FAM161B   | -0.18904 | 0.262476 | -0.74345 | 0.466368 | 0.588424 | -6.17078 |
| KCNN1     | 0.116673 | -0.42554 | 0.714625 | 0.484616 | 0.60516  | -6.17117 |
| TXNRD3    | 0.228875 | -0.00809 | 0.729896 | 0.474917 | 0.596737 | -6.17122 |
| C11orf49  | -0.14687 | 0.15583  | -0.80847 | 0.428395 | 0.553033 | -6.17131 |
| FAM195B   | 0.136846 | -0.12463 | 0.808425 | 0.428422 | 0.553033 | -6.17135 |
| LOC100506 | 0.167294 | -0.2576  | 0.808358 | 0.42846  | 0.553046 | -6.17141 |
| RABEP2    | -0.15881 | 0.302655 | -0.8083  | 0.42849  | 0.553049 | -6.17145 |
| RAD18     | 0.170677 | 0.038782 | 0.808214 | 0.42854  | 0.553077 | -6.17152 |
| PPP3R1    | 0.256019 | -0.32261 | 0.807562 | 0.428907 | 0.553514 | -6.17205 |
| RAD51C    | -0.16978 | 0.009201 | -0.80741 | 0.428994 | 0.55359  | -6.17217 |
| BAG3      | 0.189009 | -0.0971  | 0.794108 | 0.437009 | 0.56116  | -6.17235 |
| EEF1A1    | 0.338648 | -0.58818 | 0.807043 | 0.429199 | 0.55379  | -6.17246 |
| HNRNPH1   | -0.15846 | 0.24804  | -0.80702 | 0.429213 | 0.55379  | -6.17248 |
| GPR64     | -0.4363  | -0.09342 | -0.80698 | 0.429234 | 0.55379  | -6.17251 |
| C4orf43   | 0.202096 | -0.43774 | 0.806796 | 0.429338 | 0.553888 | -6.17266 |
| KIAA0240  | 0.21088  | -0.03295 | 0.806725 | 0.429378 | 0.553904 | -6.17272 |
| RPS6      | 0.31897  | -0.33935 | 0.806669 | 0.42941  | 0.553907 | -6.17276 |
| GP5       | -0.31122 | 0.151175 | -0.80642 | 0.429551 | 0.554054 | -6.17296 |
| PRB3      | -0.14504 | -0.10657 | -0.80635 | 0.429591 | 0.554068 | -6.17302 |
| COX7A2    | -0.30237 | -0.44422 | -0.80529 | 0.430185 | 0.554725 | -6.17386 |
| MAGI3     | -0.26205 | 0.421978 | -0.80519 | 0.430242 | 0.554738 | -6.17395 |
| TAS2R50   | -0.26388 | 0.046904 | -0.80517 | 0.430254 | 0.554738 | -6.17396 |
| ZNF132    | -0.27225 | 0.338196 | -0.79206 | 0.438175 | 0.562326 | -6.17396 |
| PSMC4     | 0.103356 | 0.054487 | 0.805123 | 0.43028  | 0.554738 | -6.174   |

|           |          |          |          |          |          |          |
|-----------|----------|----------|----------|----------|----------|----------|
| KCNA7     | -0.2541  | -0.12688 | -0.792   | 0.438207 | 0.562331 | -6.17401 |
| LCA5L     | -0.26684 | 0.052438 | -0.79162 | 0.438425 | 0.562573 | -6.17431 |
| ZNF607    | -0.15509 | -0.10206 | -0.8047  | 0.430517 | 0.555007 | -6.17434 |
| COL15A1   | -0.1901  | -0.09666 | -0.80443 | 0.430673 | 0.555171 | -6.17456 |
| FMR1NB    | -0.27273 | 0.226285 | -0.73828 | 0.469429 | 0.591169 | -6.1746  |
| C14orf166 | -0.15175 | -0.07145 | -0.80432 | 0.430733 | 0.555213 | -6.17464 |
| HNRNPA1F  | 0.173664 | -0.1731  | 0.73808  | 0.469549 | 0.591205 | -6.17474 |
| C6orf162  | -0.29158 | 0.168753 | -0.8039  | 0.430973 | 0.555485 | -6.17498 |
| LOC55420  | 0.172925 | -0.11331 | 0.803747 | 0.431057 | 0.555557 | -6.1751  |
| SAMD12    | 0.186813 | -0.09789 | 0.803393 | 0.431256 | 0.555741 | -6.17538 |
| RNF180    | 0.225569 | -0.26845 | 0.737089 | 0.470137 | 0.591832 | -6.17547 |
| SLC36A2   | -0.23502 | 0.027373 | -0.80313 | 0.431405 | 0.555859 | -6.17559 |
| TPPA      | 0.264862 | 0.114957 | 0.789783 | 0.439469 | 0.563471 | -6.17575 |
| UBE3B     | 0.293382 | 0.189224 | 0.789567 | 0.439592 | 0.563592 | -6.17592 |
| MTFP1     | 0.218093 | 0.051989 | 0.802061 | 0.432009 | 0.55649  | -6.17645 |
| ARHGEF4   | -0.26455 | 0.299777 | -0.80176 | 0.43218  | 0.55665  | -6.17669 |
| PGPEP1L   | -0.10205 | -0.04995 | -0.80163 | 0.43225  | 0.556692 | -6.17679 |
| KRTAP9-8  | 0.05209  | -0.01576 | 0.801457 | 0.43235  | 0.556784 | -6.17693 |
| TXNDC16   | 0.185092 | -0.30219 | 0.600168 | 0.557434 | 0.669805 | -6.17699 |
| MUC16     | -0.16996 | 0.057296 | -0.78773 | 0.440638 | 0.56471  | -6.17736 |
| POLR2F    | -0.11303 | 0.013389 | -0.80074 | 0.432756 | 0.55727  | -6.1775  |
| VEZT      | -0.26171 | 0.280329 | -0.80042 | 0.432938 | 0.557458 | -6.17776 |
| BCL9L     | -0.22209 | 0.495799 | -0.80029 | 0.433008 | 0.557458 | -6.17785 |
| LOC64699  | -0.07246 | -0.02045 | -0.80028 | 0.433015 | 0.557458 | -6.17787 |
| DUSP14    | 0.169474 | -0.12571 | 0.800279 | 0.433016 | 0.557458 | -6.17787 |
| LOC44120  | 0.239551 | -0.20494 | 0.799839 | 0.433265 | 0.557721 | -6.17822 |
| LRRC16A   | -0.37054 | 0.537038 | -0.79982 | 0.433277 | 0.557721 | -6.17823 |
| ANKRD54   | -0.12029 | 0.289478 | -0.79958 | 0.433414 | 0.557861 | -6.17843 |
| BTBD1     | -0.1684  | -0.36814 | -0.79891 | 0.433792 | 0.55826  | -6.17896 |
| IDH2      | -0.16203 | 0.275143 | -0.79886 | 0.433822 | 0.55826  | -6.179   |
| PDCL      | -0.15556 | -0.07835 | -0.79883 | 0.433838 | 0.55826  | -6.17902 |
| TMEM87B   | 0.290561 | -0.18718 | 0.798631 | 0.433949 | 0.558366 | -6.17918 |
| LOC10050  | 0.218477 | -0.05265 | 0.797873 | 0.434379 | 0.558772 | -6.17978 |
| SFMBT1    | -0.20443 | -0.13394 | -0.79774 | 0.434456 | 0.558835 | -6.17989 |
| ZNF398    | 0.108615 | -0.01153 | 0.797262 | 0.434726 | 0.559145 | -6.18026 |
| JMJD8     | 0.177257 | 0.286181 | 0.797122 | 0.434805 | 0.559155 | -6.18037 |
| RPS27A    | -0.26082 | 0.038709 | -0.7971  | 0.434819 | 0.559155 | -6.18039 |
| TTC21A    | -0.24048 | 0.513067 | -0.79703 | 0.43486  | 0.55917  | -6.18045 |
| PUSL1     | -0.14435 | 0.238988 | -0.79693 | 0.434915 | 0.559205 | -6.18053 |
| LOC10050  | -0.15857 | -0.0587  | -0.79658 | 0.435115 | 0.559425 | -6.18081 |
| UBXN11    | -0.16005 | 0.158    | -0.79591 | 0.435494 | 0.559802 | -6.18134 |
| TRIM47    | 0.163611 | 0.286223 | 0.795354 | 0.435809 | 0.560133 | -6.18177 |
| FAM9A     | -0.07578 | -0.00144 | -0.79514 | 0.43593  | 0.560252 | -6.18194 |
| CLU       | -0.26728 | 0.500734 | -0.79488 | 0.43608  | 0.560408 | -6.18215 |
| OR4K1     | -0.17698 | 0.028934 | -0.79406 | 0.436546 | 0.560971 | -6.1828  |
| SLC39A2   | -0.11787 | -0.06703 | -0.7938  | 0.43669  | 0.561037 | -6.183   |
| NECAB3    | 0.199466 | 0.203513 | 0.793788 | 0.436699 | 0.561037 | -6.18301 |

|           |          |          |          |          |          |          |
|-----------|----------|----------|----------|----------|----------|----------|
| LOC100655 | -0.27052 | -0.46536 | -0.79377 | 0.436708 | 0.561037 | -6.18303 |
| REPIN1    | 0.125701 | 0.056659 | 0.793764 | 0.436712 | 0.561037 | -6.18303 |
| EHMT2     | -0.24227 | 0.817614 | -0.7937  | 0.43675  | 0.561049 | -6.18308 |
| TSPYL5    | -0.43239 | 0.554624 | -0.79353 | 0.436848 | 0.56109  | -6.18322 |
| LOC100125 | -0.11959 | -0.09139 | -0.79352 | 0.436848 | 0.56109  | -6.18322 |
| OR2C3     | -0.13972 | -0.07806 | -0.78022 | 0.444943 | 0.568629 | -6.18323 |
| AKR1A1    | 0.145737 | -0.1     | 0.793392 | 0.436924 | 0.561125 | -6.18332 |
| ZNF675    | -0.12934 | -0.43871 | -0.79329 | 0.43698  | 0.56116  | -6.1834  |
| NANOS3    | 0.134193 | -0.01155 | 0.793073 | 0.437106 | 0.561249 | -6.18358 |
| VPS37C    | -0.18044 | 0.219802 | -0.79245 | 0.437459 | 0.561665 | -6.18407 |
| BRSK2     | 0.137519 | -0.15001 | 0.792339 | 0.437524 | 0.561711 | -6.18416 |
| SATB2     | -0.32372 | -0.19428 | -0.72508 | 0.4773   | 0.598887 | -6.18424 |
| BTRC      | 0.146772 | -0.3344  | 0.792181 | 0.437614 | 0.56179  | -6.18428 |
| C15orf61  | -0.23501 | 0.460959 | -0.79124 | 0.438151 | 0.562326 | -6.18502 |
| NKX6-2    | 0.15474  | -0.23435 | 0.791219 | 0.438162 | 0.562326 | -6.18504 |
| OLFML2A   | -0.18184 | 0.057586 | -0.7912  | 0.438174 | 0.562326 | -6.18505 |
| CSNK1A1L  | -0.22792 | -0.07003 | -0.77784 | 0.446308 | 0.569927 | -6.18508 |
| CASD1     | 0.221229 | -0.56099 | 0.790328 | 0.43867  | 0.562851 | -6.18574 |
| RREB1     | 0.126402 | -0.07637 | 0.790198 | 0.438744 | 0.562909 | -6.18584 |
| TARS2     | -0.13771 | 0.244326 | -0.78987 | 0.438929 | 0.563073 | -6.1861  |
| HLA-DQB1  | 0.297572 | 0.159914 | 0.789821 | 0.438959 | 0.563074 | -6.18614 |
| GALNT13   | 0.254942 | 0.149719 | 0.789598 | 0.439086 | 0.563201 | -6.18631 |
| FGD6      | -0.24671 | 0.041142 | -0.78954 | 0.439121 | 0.563209 | -6.18636 |
| KIF21A    | 0.105542 | -0.07863 | 0.789397 | 0.439201 | 0.563275 | -6.18647 |
| SETDB2    | -0.17425 | -0.20007 | -0.78932 | 0.439247 | 0.563296 | -6.18653 |
| JMJD1C    | 0.170873 | -0.204   | 0.603665 | 0.5546   | 0.667332 | -6.18661 |
| LRRC32    | 0.182845 | -0.06446 | 0.789101 | 0.43937  | 0.563418 | -6.1867  |
| XKRY2     | 0.18554  | 0.007862 | 0.789009 | 0.439422 | 0.563447 | -6.18677 |
| PRSS22    | -0.19894 | -0.0482  | -0.72141 | 0.479506 | 0.600572 | -6.18689 |
| C12orf61  | 0.177321 | -0.25038 | 0.721367 | 0.479529 | 0.600572 | -6.18692 |
| IGF2R     | 0.320645 | -0.22429 | 0.788573 | 0.439672 | 0.563657 | -6.18712 |
| PRRC2C    | 0.195568 | -0.22091 | 0.788015 | 0.439991 | 0.564028 | -6.18756 |
| SNX11     | -0.13971 | -0.03206 | -0.7877  | 0.440168 | 0.564188 | -6.1878  |
| ABCD2     | -0.27961 | -0.01789 | -0.7877  | 0.440172 | 0.564188 | -6.1878  |
| ZNF446    | -0.14868 | 0.141957 | -0.78714 | 0.440489 | 0.564557 | -6.18824 |
| CASP6     | 0.215771 | -0.103   | 0.786744 | 0.440717 | 0.564775 | -6.18855 |
| MRGPRX1   | -0.15672 | -0.05527 | -0.77332 | 0.448914 | 0.57221  | -6.18857 |
| DNMBP     | -0.17229 | 0.386726 | -0.78654 | 0.440833 | 0.564883 | -6.18871 |
| TRAF3IP3  | -0.16502 | 0.188879 | -0.7865  | 0.440859 | 0.564883 | -6.18875 |
| ACAA2     | 0.277421 | 0.142504 | 0.77308  | 0.449054 | 0.572352 | -6.18876 |
| CRYAB     | -0.13243 | 0.002621 | -0.78627 | 0.440986 | 0.564972 | -6.18892 |
| LEPRE1    | -0.08673 | 0.142758 | -0.78613 | 0.44107  | 0.564982 | -6.18903 |
| TESK1     | -0.1372  | 0.408411 | -0.78612 | 0.441072 | 0.564982 | -6.18904 |
| PAFAH1B3  | 0.200708 | 0.08637  | 0.786109 | 0.44108  | 0.564982 | -6.18905 |
| FAM109A   | 0.169016 | 0.072363 | 0.785859 | 0.441224 | 0.565129 | -6.18924 |
| TOPORS    | -0.24328 | 0.501345 | -0.78577 | 0.441273 | 0.565139 | -6.18931 |
| LOC728724 | -0.22483 | -0.19512 | -0.77235 | 0.449473 | 0.572699 | -6.18932 |

|           |          |          |          |          |          |          |
|-----------|----------|----------|----------|----------|----------|----------|
| SPOP      | 0.095651 | 0.075399 | 0.78571  | 0.441309 | 0.565139 | -6.18936 |
| NEUROD1   | -0.13003 | 0.082521 | -0.78569 | 0.441319 | 0.565139 | -6.18937 |
| HADHA     | -0.13985 | 0.101853 | -0.7856  | 0.441373 | 0.565172 | -6.18945 |
| NRG4      | 0.119577 | -0.1069  | 0.785422 | 0.441474 | 0.565265 | -6.18959 |
| MKRN7P    | 0.145958 | -0.14394 | 0.785352 | 0.441514 | 0.565279 | -6.18964 |
| SH3GLB2   | -0.14972 | 0.384321 | -0.785   | 0.441714 | 0.565498 | -6.18991 |
| CCDC14    | -0.18966 | -0.18223 | -0.78486 | 0.441798 | 0.565568 | -6.19003 |
| HIST1H2A  | 0.187165 | -0.18502 | 0.703461 | 0.490836 | 0.610786 | -6.19016 |
| LOC100329 | 0.135049 | -0.08876 | 0.784455 | 0.442028 | 0.565826 | -6.19034 |
| EPO       | -0.20372 | 0.002192 | -0.78437 | 0.442076 | 0.565851 | -6.19041 |
| NALCN     | -0.1718  | 0.100148 | -0.78425 | 0.442144 | 0.5659   | -6.1905  |
| CASP3     | -0.2202  | -0.32574 | -0.78418 | 0.442184 | 0.565914 | -6.19055 |
| IGSF21    | -0.14668 | 0.027463 | -0.78402 | 0.442277 | 0.565997 | -6.19068 |
| SP3       | -0.1937  | -0.3429  | -0.78389 | 0.442351 | 0.566018 | -6.19078 |
| SLURP1    | 0.23748  | -0.28777 | 0.783798 | 0.442404 | 0.566049 | -6.19085 |
| SLC16A14  | -0.13896 | 0.056914 | -0.78366 | 0.442486 | 0.566116 | -6.19096 |
| ZNF185    | -0.25996 | 0.257151 | -0.78322 | 0.442733 | 0.566396 | -6.1913  |
| GSG1      | 0.163314 | -0.21882 | 0.769749 | 0.45098  | 0.574135 | -6.19132 |
| SLC46A1   | 0.125305 | -0.03004 | 0.783097 | 0.442806 | 0.566452 | -6.1914  |
| ELOVL7    | -0.28186 | 0.26902  | -0.78266 | 0.443055 | 0.566733 | -6.19174 |
| CAP2      | -0.24188 | -0.27073 | -0.7146  | 0.483607 | 0.604247 | -6.19178 |
| ACOXL     | 0.192586 | 0.06689  | 0.752914 | 0.461309 | 0.583643 | -6.19203 |
| LYSMD2    | 0.256192 | -0.13704 | 0.782232 | 0.443303 | 0.566969 | -6.19208 |
| ZSCAN20   | -0.13449 | 0.346835 | -0.78219 | 0.443327 | 0.566969 | -6.19211 |
| ZNF350    | -0.33673 | 0.240598 | -0.70052 | 0.492626 | 0.612469 | -6.19223 |
| PSG3      | -0.16968 | 0.006699 | -0.76849 | 0.45171  | 0.574765 | -6.19229 |
| GTPBP8    | 0.19111  | -0.2948  | 0.781932 | 0.443475 | 0.567091 | -6.19231 |
| ZNF688    | 0.135024 | -0.10285 | 0.781925 | 0.443479 | 0.567091 | -6.19231 |
| MPG       | 0.132468 | -0.08368 | 0.781438 | 0.443759 | 0.567396 | -6.19269 |
| CYLC1     | 0.173692 | -0.04819 | 0.751882 | 0.461914 | 0.58422  | -6.19281 |
| LIMK1     | -0.24005 | 0.393048 | -0.78121 | 0.443891 | 0.567506 | -6.19287 |
| CDCP1     | -0.14584 | 0.151381 | -0.69939 | 0.493317 | 0.613219 | -6.19303 |
| RIOK2     | -0.27425 | 0.541176 | -0.78095 | 0.444038 | 0.567658 | -6.19307 |
| ANXA2     | -0.19543 | 0.366184 | -0.7806  | 0.444242 | 0.56788  | -6.19335 |
| CD40LG    | -0.32088 | 0.270353 | -0.60874 | 0.550812 | 0.663956 | -6.19343 |
| EFCAB1    | -0.16336 | 0.118618 | -0.78041 | 0.444348 | 0.567979 | -6.19349 |
| TMPRSS11  | -0.20589 | 0.14175  | -0.76669 | 0.452756 | 0.575797 | -6.19367 |
| PYCRL     | -0.26452 | 0.529722 | -0.77999 | 0.444594 | 0.568257 | -6.19382 |
| DFNB59    | 0.15989  | 0.161878 | 0.730625 | 0.475037 | 0.59685  | -6.19436 |
| ZMAT4     | 0.247114 | 0.13018  | 0.765741 | 0.453305 | 0.576271 | -6.19439 |
| SCAMP4    | -0.12219 | 0.031398 | -0.779   | 0.445163 | 0.568872 | -6.19459 |
| DPYS      | 0.170617 | -0.44648 | 0.749465 | 0.463333 | 0.585561 | -6.19462 |
| IFIT3     | -0.69501 | 0.779645 | -0.77884 | 0.445251 | 0.568949 | -6.19471 |
| NCAPD3    | -0.29726 | 0.566057 | -0.77869 | 0.445341 | 0.569026 | -6.19483 |
| RCN3      | -0.263   | 0.615772 | -0.77859 | 0.445395 | 0.569058 | -6.1949  |
| ICOS      | 0.403643 | -0.62961 | 0.77839  | 0.445513 | 0.569171 | -6.19506 |
| KRT73     | -0.21736 | 0.469457 | -0.77798 | 0.445746 | 0.569432 | -6.19538 |

|           |          |          |          |          |          |          |
|-----------|----------|----------|----------|----------|----------|----------|
| UBXN2B    | -0.37606 | 0.631805 | -0.77781 | 0.445844 | 0.56952  | -6.19551 |
| LOC100170 | 0.239541 | -0.11648 | 0.777372 | 0.446099 | 0.569795 | -6.19585 |
| TAF1D     | 0.322714 | 0.065211 | 0.77734  | 0.446117 | 0.569795 | -6.19587 |
| GRID1     | 0.34831  | 0.121539 | 0.77717  | 0.446215 | 0.569883 | -6.19601 |
| FGF16     | -0.12644 | 0.199829 | -0.77709 | 0.446264 | 0.569908 | -6.19607 |
| TTC39B    | -0.18822 | 0.08778  | -0.76341 | 0.454661 | 0.57732  | -6.19617 |
| DOLK      | 0.147422 | -0.09361 | 0.776707 | 0.446482 | 0.570101 | -6.19637 |
| SEMG2     | -0.13621 | -0.01543 | -0.77667 | 0.446502 | 0.570101 | -6.19639 |
| KIAA1522  | 0.275554 | 0.383171 | 0.707969 | 0.48762  | 0.607875 | -6.19649 |
| DAAM1     | -0.16172 | 0.275211 | -0.77634 | 0.446694 | 0.570266 | -6.19665 |
| MARCKS    | -0.22673 | 0.217207 | -0.77631 | 0.446713 | 0.570266 | -6.19667 |
| ITPA      | 0.153999 | -0.01949 | 0.776296 | 0.446719 | 0.570266 | -6.19668 |
| C19orf71  | 0.247754 | 0.31012  | 0.776177 | 0.446788 | 0.570271 | -6.19678 |
| THUMPD1   | -0.23736 | 0.427753 | -0.77616 | 0.446796 | 0.570271 | -6.19679 |
| GLUD1     | -0.18404 | -0.20539 | -0.77614 | 0.44681  | 0.570271 | -6.1968  |
| SFXN2     | 0.164295 | 0.00982  | 0.762156 | 0.455391 | 0.578144 | -6.19712 |
| SPRED2    | -0.24754 | 0.073806 | -0.76214 | 0.455398 | 0.578144 | -6.19713 |
| GBX2      | 0.210114 | -0.28393 | 0.726424 | 0.47754  | 0.599073 | -6.19742 |
| LTB4R2    | -0.23056 | 0.136956 | -0.77518 | 0.447363 | 0.570864 | -6.19754 |
| TIGD4     | 0.274246 | 0.155339 | 0.775001 | 0.447466 | 0.57096  | -6.19768 |
| HDAC1     | -0.10732 | 0.168097 | -0.77486 | 0.447547 | 0.571001 | -6.19779 |
| RAB39B    | 0.125395 | 0.164005 | 0.774845 | 0.447557 | 0.571001 | -6.1978  |
| ZNF57     | -0.18099 | 0.288611 | -0.77474 | 0.447619 | 0.571043 | -6.19789 |
| GALNTL4   | -0.19591 | 0.101882 | -0.77455 | 0.447728 | 0.571145 | -6.19803 |
| BIRC3     | -0.30102 | -0.58351 | -0.77432 | 0.447861 | 0.571277 | -6.19821 |
| AKAP9     | 0.132397 | -0.26732 | 0.773872 | 0.448119 | 0.571532 | -6.19855 |
| HIST1H2AF | -0.14886 | 0.173248 | -0.77352 | 0.448324 | 0.571675 | -6.19883 |
| TTC37     | 0.186853 | -0.00012 | 0.773478 | 0.448347 | 0.571675 | -6.19886 |
| ZSCAN12   | 0.175524 | -0.35712 | 0.773475 | 0.448348 | 0.571675 | -6.19886 |
| IPO13     | 0.1466   | 0.114303 | 0.773325 | 0.448435 | 0.571749 | -6.19898 |
| RPL27A    | -0.21593 | 0.056541 | -0.77294 | 0.448657 | 0.571965 | -6.19927 |
| WDR66     | 0.363897 | 0.24933  | 0.772931 | 0.448663 | 0.571965 | -6.19928 |
| HTN1      | -0.19818 | -0.20538 | -0.77257 | 0.448874 | 0.572197 | -6.19956 |
| UBXN10    | -0.11944 | -0.09741 | -0.77215 | 0.449114 | 0.572383 | -6.19988 |
| OR7D2     | -0.21503 | -0.25798 | -0.69924 | 0.494529 | 0.614563 | -6.1999  |
| LOC100506 | -0.11994 | 0.021381 | -0.77211 | 0.449137 | 0.572383 | -6.19991 |
| PNRC2     | -0.23292 | -0.13946 | -0.77182 | 0.449307 | 0.572562 | -6.20014 |
| TNXB      | 0.1173   | -0.20556 | 0.77161  | 0.449427 | 0.572679 | -6.2003  |
| METTL4    | 0.142976 | 0.013022 | 0.771335 | 0.449587 | 0.572792 | -6.20051 |
| DLEU1     | -0.225   | 0.151454 | -0.77131 | 0.449604 | 0.572792 | -6.20053 |
| KRT20     | 0.127276 | -0.03326 | 0.771181 | 0.449676 | 0.572847 | -6.20063 |
| PNMAL1    | -0.2098  | -0.61111 | -0.5599  | 0.583889 | 0.693503 | -6.20064 |
| SIK2      | -0.29715 | 0.383858 | -0.77075 | 0.449926 | 0.57309  | -6.20096 |
| ZFPM2     | 0.18101  | -0.17408 | 0.770377 | 0.450142 | 0.573328 | -6.20124 |
| NOP16     | -0.2017  | 0.415178 | -0.76995 | 0.450389 | 0.573606 | -6.20157 |
| OR6M1     | 0.160999 | -0.32438 | 0.769783 | 0.450486 | 0.573692 | -6.2017  |
| CREB3L4   | 0.161482 | 0.088899 | 0.769489 | 0.450657 | 0.573835 | -6.20193 |

|           |          |           |          |          |          |          |
|-----------|----------|-----------|----------|----------|----------|----------|
| POTEC     | 0.191784 | -0.15844  | 0.686564 | 0.501172 | 0.621281 | -6.20193 |
| LOC374890 | 0.131092 | -0.14647  | 0.769334 | 0.450746 | 0.573874 | -6.20204 |
| UBQLN4    | -0.23271 | 0.495989  | -0.76866 | 0.451136 | 0.57425  | -6.20256 |
| CAMK2N1   | -0.18686 | 0.048032  | -0.76863 | 0.451155 | 0.57425  | -6.20258 |
| TMEM1201  | -0.04992 | 0.009984  | -0.76862 | 0.451159 | 0.57425  | -6.20259 |
| REEP2     | 0.113028 | 0.323493  | 0.768486 | 0.451238 | 0.574314 | -6.20269 |
| GRHL1     | -0.11494 | 0.123621  | -0.76831 | 0.451341 | 0.574361 | -6.20283 |
| PEG3-AS1  | 0.149444 | -0.0566   | 0.754602 | 0.459805 | 0.582267 | -6.20284 |
| RTN4IP1   | -0.17616 | 0.033892  | -0.76827 | 0.451363 | 0.574361 | -6.20286 |
| APOOL     | -0.20179 | 0.126248  | -0.69791 | 0.493747 | 0.613668 | -6.20356 |
| HES1      | 0.323422 | 0.274569  | 0.76707  | 0.452061 | 0.575174 | -6.20378 |
| ERCC8     | -0.28022 | 0.261567  | -0.76687 | 0.45218  | 0.57525  | -6.20393 |
| ZDHHC8P1  | 0.14876  | -0.19885  | 0.752739 | 0.460898 | 0.583311 | -6.20424 |
| LARS2     | -0.1831  | 0.264293  | -0.76642 | 0.45244  | 0.575536 | -6.20428 |
| GRAMD3    | 0.116023 | -0.25424  | 0.766378 | 0.452463 | 0.575536 | -6.20431 |
| SETD1B    | 0.249161 | 0.344447  | 0.766189 | 0.452573 | 0.575639 | -6.20445 |
| GJA9      | 0.160185 | -0.2402   | 0.752429 | 0.461079 | 0.583466 | -6.20447 |
| P2RY12    | 0.19581  | -0.39912  | 0.666393 | 0.514173 | 0.632576 | -6.20458 |
| CYP3A7    | 0.126014 | -0.12981  | 0.765943 | 0.452716 | 0.575783 | -6.20464 |
| CPEB1     | -0.14528 | -0.11875  | -0.7656  | 0.452915 | 0.575929 | -6.2049  |
| TMEM200   | 0.09637  | -0.39361  | 0.765595 | 0.452919 | 0.575929 | -6.20491 |
| FREM3     | 0.276271 | 0.046872  | 0.765275 | 0.453105 | 0.576128 | -6.20515 |
| PXMP4     | -0.14871 | 0.306044  | -0.76518 | 0.453157 | 0.576158 | -6.20522 |
| MRPL30    | -0.17656 | -0.18809  | -0.76509 | 0.453215 | 0.576193 | -6.20529 |
| RIMS1     | 0.119184 | 0.03182   | 0.764583 | 0.453507 | 0.57649  | -6.20568 |
| REPS2     | 0.293989 | 0.168281  | 0.764422 | 0.453601 | 0.576572 | -6.2058  |
| ZNF71     | -0.25288 | 0.247226  | -0.76422 | 0.453722 | 0.576688 | -6.20596 |
| RG9MTD1   | -0.20189 | -0.25209  | -0.76415 | 0.453762 | 0.576702 | -6.20601 |
| ADPRHL2   | -0.11498 | 0.128492  | -0.76401 | 0.453841 | 0.576764 | -6.20611 |
| C15orf55  | 0.229314 | -0.10942  | 0.750198 | 0.46239  | 0.584671 | -6.20615 |
| PRKRA     | 0.16875  | -0.44161  | 0.431791 | 0.67209  | 0.766393 | -6.20617 |
| C9orf89   | -0.16817 | 0.019601  | -0.76392 | 0.453891 | 0.576791 | -6.20618 |
| LOC221273 | -0.21777 | 0.237934  | -0.75014 | 0.462422 | 0.584674 | -6.20619 |
| UBE3C     | -0.04951 | 0.009902  | -0.76383 | 0.453945 | 0.576822 | -6.20625 |
| INS       | -0.10299 | -0.09199  | -0.76362 | 0.454067 | 0.57694  | -6.20641 |
| HIBADH    | 0.147467 | -0.19988  | 0.763402 | 0.454195 | 0.577058 | -6.20658 |
| FGG       | 0.184572 | -0.34166  | 0.763362 | 0.454219 | 0.577058 | -6.20661 |
| MMP20     | 0.185823 | 0.059301  | 0.749555 | 0.462768 | 0.584999 | -6.20663 |
| NOVA1     | -0.13733 | -0.12576  | -0.76316 | 0.454337 | 0.577096 | -6.20676 |
| CYB561D2  | -0.10544 | -3.26E-05 | -0.76309 | 0.454374 | 0.577106 | -6.20681 |
| SAG       | -0.26775 | 0.356704  | -0.76272 | 0.454595 | 0.577311 | -6.2071  |
| SLC16A2   | 0.253276 | -0.87656  | 0.442945 | 0.665773 | 0.7613   | -6.20766 |
| AMIGO2    | -0.33276 | -0.15319  | -0.76178 | 0.455139 | 0.577889 | -6.20781 |
| RPUSD4    | -0.18473 | 0.291471  | -0.76055 | 0.455858 | 0.578612 | -6.20874 |
| ZNF296    | -0.14349 | 0.340699  | -0.76051 | 0.455885 | 0.578612 | -6.20878 |
| RNF113B   | 0.2255   | -0.11124  | 0.730318 | 0.474665 | 0.596458 | -6.20879 |
| WDR6      | 0.154207 | -0.0632   | 0.760398 | 0.455948 | 0.578654 | -6.20886 |

|           |          |          |          |          |          |          |
|-----------|----------|----------|----------|----------|----------|----------|
| PFN4      | 0.12254  | -0.25281 | 0.746532 | 0.464549 | 0.586499 | -6.20889 |
| RP1L1     | -0.15228 | 0.009561 | -0.74652 | 0.464554 | 0.586499 | -6.2089  |
| LOC439914 | 0.189287 | 0.190925 | 0.746198 | 0.464746 | 0.58665  | -6.20914 |
| C11orf87  | 0.069333 | 0.006275 | 0.759981 | 0.456192 | 0.578926 | -6.20918 |
| PHKB      | -0.12211 | -0.02042 | -0.75965 | 0.456387 | 0.579136 | -6.20943 |
| CRTAM     | 0.311256 | -0.32582 | 0.581945 | 0.568302 | 0.679808 | -6.2095  |
| NAP1L3    | 0.308857 | -0.50486 | 0.759448 | 0.456503 | 0.579245 | -6.20958 |
| RPLP0     | 0.30739  | -0.36083 | 0.759399 | 0.456531 | 0.579245 | -6.20962 |
| WDR33     | 0.133463 | 0.025131 | 0.75917  | 0.456666 | 0.579377 | -6.20979 |
| ZNF790    | -0.23173 | 0.095316 | -0.75899 | 0.456768 | 0.57947  | -6.20992 |
| GTF2H3    | 0.289228 | 0.201829 | 0.758837 | 0.45686  | 0.579547 | -6.21004 |
| LOC100506 | -0.22961 | 0.28224  | -0.75877 | 0.4569   | 0.579547 | -6.21009 |
| SSPO      | 0.298644 | -0.01827 | 0.758738 | 0.456918 | 0.579547 | -6.21012 |
| LSM3      | -0.2806  | -0.38868 | -0.7583  | 0.457174 | 0.579835 | -6.21045 |
| KYNU      | -0.39049 | 0.362887 | -0.75812 | 0.457279 | 0.57993  | -6.21058 |
| C7orf70   | -0.13729 | 0.029069 | -0.75737 | 0.457718 | 0.580413 | -6.21115 |
| PET112    | -0.18533 | 0.110839 | -0.75717 | 0.457835 | 0.580523 | -6.2113  |
| GXYLT2    | -0.21344 | 0.170408 | -0.75712 | 0.457865 | 0.580523 | -6.21134 |
| ITPKB     | -0.25649 | 0.679077 | -0.75698 | 0.457946 | 0.580588 | -6.21144 |
| C3orf36   | -0.19821 | -0.09013 | -0.75681 | 0.458048 | 0.580665 | -6.21158 |
| HSPH1     | 0.404605 | -0.00418 | 0.756778 | 0.458065 | 0.580665 | -6.2116  |
| MOGAT2    | -0.21056 | 0.211652 | -0.74274 | 0.46679  | 0.588791 | -6.21171 |
| YWHAH     | -0.15568 | 0.26747  | -0.7565  | 0.458229 | 0.580834 | -6.21181 |
| NPRL2     | 0.093125 | -0.01265 | 0.756433 | 0.458267 | 0.580845 | -6.21186 |
| ATP6V0E2  | 0.281958 | 0.246988 | 0.756335 | 0.458325 | 0.580881 | -6.21193 |
| KCNK5     | 0.224189 | 0.033346 | 0.756139 | 0.458439 | 0.580988 | -6.21208 |
| MAP1S     | -0.1495  | 0.329513 | -0.75601 | 0.458517 | 0.581049 | -6.21218 |
| LINC00313 | 0.138975 | -0.41598 | 0.671475 | 0.510508 | 0.629272 | -6.21221 |
| MAFB      | 0.215331 | -0.14465 | 0.75584  | 0.458615 | 0.581098 | -6.21231 |
| CLEC12B   | -0.45521 | 0.694277 | -0.75578 | 0.45865  | 0.581105 | -6.21235 |
| C1QL2     | -0.17518 | -0.23124 | -0.74174 | 0.46738  | 0.589346 | -6.21245 |
| LOC100125 | 0.208957 | -0.20447 | 0.705404 | 0.490188 | 0.610174 | -6.21252 |
| C8orf85   | 0.116853 | -0.16673 | 0.75526  | 0.458955 | 0.581454 | -6.21274 |
| HECTD1    | -0.11525 | -0.22532 | -0.75512 | 0.459034 | 0.581517 | -6.21285 |
| ARRDC2    | -0.09746 | 0.275144 | -0.75505 | 0.459075 | 0.581531 | -6.2129  |
| CMBL      | 0.420653 | 0.096474 | 0.754706 | 0.45928  | 0.581752 | -6.21316 |
| TMSB15B   | -0.24707 | 0.12664  | -0.74063 | 0.468035 | 0.589792 | -6.21327 |
| EIF1AY    | -0.40049 | 0.179995 | -0.75428 | 0.459529 | 0.582031 | -6.21348 |
| ZNF354C   | 0.091475 | -0.0596  | 0.740011 | 0.468404 | 0.590143 | -6.21373 |
| CHRNE     | -0.17347 | 0.081415 | -0.75384 | 0.459787 | 0.582267 | -6.21381 |
| SNRPN     | 0.225731 | 0.072521 | 0.753834 | 0.459791 | 0.582267 | -6.21382 |
| ABCC12    | -0.15005 | -0.00137 | -0.75352 | 0.459975 | 0.582431 | -6.21405 |
| IFI27L1   | -0.15359 | 0.175453 | -0.75349 | 0.459994 | 0.582431 | -6.21408 |
| HSD17B2   | -0.10825 | -0.19407 | -0.70303 | 0.491627 | 0.611462 | -6.21419 |
| RPL21     | 0.237061 | -0.22212 | 0.753301 | 0.460104 | 0.582533 | -6.21422 |
| P2RX6     | 0.206691 | 0.071798 | 0.682377 | 0.503294 | 0.623201 | -6.2143  |
| NDRG4     | -0.10536 | -0.08072 | -0.75311 | 0.460216 | 0.582637 | -6.21436 |

|           |          |          |          |          |          |          |
|-----------|----------|----------|----------|----------|----------|----------|
| REG1P     | 0.152311 | 0.065623 | 0.739056 | 0.46897  | 0.590666 | -6.21444 |
| C17orf79  | 0.160299 | 0.00383  | 0.75292  | 0.460328 | 0.582741 | -6.2145  |
| LOC100506 | 0.159963 | 0.07268  | 0.722224 | 0.479505 | 0.600572 | -6.21468 |
| DSCR6     | 0.144641 | -0.10142 | 0.752481 | 0.460586 | 0.58303  | -6.21483 |
| VWA5B1    | 0.128569 | -0.21149 | 0.650597 | 0.524072 | 0.641031 | -6.21504 |
| CYFIP2    | 0.15322  | 0.100925 | 0.752207 | 0.460747 | 0.583196 | -6.21504 |
| MTPN      | 0.177961 | 0.039447 | 0.75204  | 0.460846 | 0.583283 | -6.21517 |
| ZIC4      | -0.15432 | -0.02118 | -0.75186 | 0.460949 | 0.583339 | -6.2153  |
| GPRIN1    | -0.22571 | 0.454316 | -0.75153 | 0.461147 | 0.583514 | -6.21555 |
| AQP6      | 0.231064 | 0.024827 | 0.68045  | 0.504486 | 0.624323 | -6.21561 |
| NOC3L     | -0.31316 | -0.24506 | -0.75136 | 0.461247 | 0.583603 | -6.21568 |
| GJC1      | 0.226455 | -0.04921 | 0.680219 | 0.504629 | 0.624381 | -6.21577 |
| GIMAP7    | 0.225709 | -0.00927 | 0.751116 | 0.461389 | 0.58365  | -6.21586 |
| ARL6IP4   | -0.13046 | 0.12751  | -0.75109 | 0.461402 | 0.58365  | -6.21588 |
| PHF20     | -0.17682 | 0.075    | -0.75109 | 0.461403 | 0.58365  | -6.21588 |
| CD1D      | -0.22409 | 0.098784 | -0.75081 | 0.46157  | 0.583823 | -6.21609 |
| DGKG      | 0.191679 | 0.50291  | 0.679073 | 0.505339 | 0.624865 | -6.21655 |
| CCDC23    | 0.221822 | -0.0374  | 0.75013  | 0.461969 | 0.584252 | -6.2166  |
| CDADC1    | 0.19161  | -0.17905 | 0.75003  | 0.462028 | 0.584289 | -6.21667 |
| DCUN1D3   | -0.22579 | -0.02658 | -0.74981 | 0.462157 | 0.584414 | -6.21684 |
| OR7E47P   | -0.12731 | 0.041816 | -0.7188  | 0.481559 | 0.602407 | -6.21714 |
| MOBP      | 0.101108 | -0.05818 | 0.749168 | 0.462536 | 0.58478  | -6.21732 |
| TMEM8B    | -0.19496 | 0.104573 | -0.74871 | 0.462804 | 0.585006 | -6.21766 |
| ETFB      | 0.120752 | -0.09821 | 0.747916 | 0.463274 | 0.585525 | -6.21825 |
| PDILT     | 0.248368 | 0.156864 | 0.676526 | 0.506917 | 0.626082 | -6.21828 |
| TTYH3     | 0.193242 | 0.217951 | 0.747694 | 0.463404 | 0.585614 | -6.21842 |
| KLHL26    | 0.133845 | 0.181418 | 0.7476   | 0.46346  | 0.585647 | -6.21849 |
| RCN2      | -0.24536 | -0.38604 | -0.74726 | 0.463661 | 0.585784 | -6.21874 |
| SOX10     | -0.10985 | -0.00787 | -0.74723 | 0.463677 | 0.585784 | -6.21876 |
| ITM2C     | 0.308513 | 0.715243 | 0.747213 | 0.463689 | 0.585784 | -6.21878 |
| SSX5      | 0.18643  | -0.23054 | 0.732741 | 0.472723 | 0.594477 | -6.21909 |
| RBMXL2    | -0.20084 | 0.038138 | -0.74678 | 0.463943 | 0.586031 | -6.2191  |
| RBBP9     | 0.128681 | -0.26368 | 0.623958 | 0.541524 | 0.656435 | -6.21914 |
| SLCO1B7   | 0.086886 | -0.02946 | 0.746455 | 0.464136 | 0.586209 | -6.21934 |
| BOLL      | 0.154437 | -0.13555 | 0.74644  | 0.464144 | 0.586209 | -6.21935 |
| PGP       | 0.095528 | -0.18176 | 0.746179 | 0.464299 | 0.586366 | -6.21955 |
| LRRC8B    | -0.17702 | 0.1828   | -0.74605 | 0.464373 | 0.586423 | -6.21964 |
| HAMP      | 0.25678  | -0.30088 | 0.745823 | 0.464509 | 0.586499 | -6.21981 |
| MYT1      | 0.15398  | -0.20063 | 0.660058 | 0.517637 | 0.63554  | -6.21984 |
| KAZN      | 0.04801  | -0.00967 | 0.745771 | 0.46454  | 0.586499 | -6.21985 |
| CDH2      | -0.13882 | -0.52138 | -0.34053 | 0.738956 | 0.82151  | -6.21996 |
| TSPYL1    | -0.16278 | 0.275057 | -0.74558 | 0.46465  | 0.586583 | -6.21999 |
| ZNHIT1    | -0.13672 | 0.068825 | -0.74487 | 0.46507  | 0.586961 | -6.22052 |
| DUSP2     | -0.17207 | 0.126857 | -0.74481 | 0.465109 | 0.586974 | -6.22057 |
| SFRP5     | 0.170419 | -0.29583 | 0.67236  | 0.509507 | 0.628512 | -6.2211  |
| LINC00347 | 0.225151 | -0.37036 | 0.671686 | 0.509926 | 0.628831 | -6.22155 |
| TBR1      | 0.118738 | 0.041771 | 0.712591 | 0.485303 | 0.60567  | -6.2216  |



|           |          |          |          |          |          |          |
|-----------|----------|----------|----------|----------|----------|----------|
| DDX39A    | 0.138557 | 0.003121 | 0.743142 | 0.466094 | 0.588179 | -6.22181 |
| GLRA1     | 0.158739 | -0.12275 | 0.640029 | 0.530753 | 0.64674  | -6.2219  |
| ACBD6     | 0.174163 | 0.027744 | 0.742906 | 0.466234 | 0.588317 | -6.22198 |
| ALS2CL    | 0.25384  | 0.23059  | 0.742619 | 0.466404 | 0.588424 | -6.2222  |
| SH2D3C    | 0.163129 | 0.280561 | 0.74261  | 0.466409 | 0.588424 | -6.2222  |
| LIG1      | 0.187647 | 0.040671 | 0.742387 | 0.466541 | 0.588553 | -6.22237 |
| NRIP1     | -0.18366 | -0.44233 | -0.74219 | 0.466657 | 0.588661 | -6.22251 |
| NKAPL     | 0.126386 | -0.04781 | 0.711175 | 0.486159 | 0.606507 | -6.22261 |
| CSF2      | 0.255063 | -0.09426 | 0.727714 | 0.475724 | 0.597445 | -6.22276 |
| ILF2      | -0.17004 | 0.132821 | -0.74182 | 0.466878 | 0.588864 | -6.22279 |
| NAGK      | 0.146471 | -0.00568 | 0.741664 | 0.466969 | 0.588942 | -6.2229  |
| ARMC4     | 0.159462 | -0.06655 | 0.741418 | 0.467115 | 0.589088 | -6.22309 |
| RAP2A     | -0.10048 | -0.54424 | -0.28386 | 0.781411 | 0.853454 | -6.22328 |
| PI4KAP2   | -0.28157 | 0.587734 | -0.74114 | 0.467278 | 0.589255 | -6.22329 |
| C1orf53   | 0.269186 | -0.17017 | 0.740904 | 0.46742  | 0.589346 | -6.22347 |
| NECAB1    | 0.236049 | 0.141629 | 0.740822 | 0.467469 | 0.589346 | -6.22353 |
| FLJ13224  | 0.103415 | -0.12021 | 0.740819 | 0.46747  | 0.589346 | -6.22353 |
| DDX41     | -0.09378 | 0.235951 | -0.7406  | 0.467598 | 0.589469 | -6.22369 |
| KCNQ1     | 0.350031 | -0.05672 | 0.74048  | 0.467672 | 0.589496 | -6.22378 |
| HSP90AB6  | 0.538897 | -0.33534 | 0.740465 | 0.46768  | 0.589496 | -6.22379 |
| CHRM2     | 0.130229 | -0.23229 | 0.538957 | 0.597399 | 0.705784 | -6.22399 |
| NIF3L1    | -0.20271 | -0.26039 | -0.74019 | 0.467842 | 0.589663 | -6.22399 |
| GEMIN5    | -0.18176 | 0.344955 | -0.74006 | 0.467923 | 0.589727 | -6.22409 |
| SHANK3    | 0.183516 | -0.12198 | 0.739897 | 0.468017 | 0.589792 | -6.22421 |
| HSD17B13  | -0.09475 | -0.06444 | -0.70885 | 0.487565 | 0.607874 | -6.22427 |
| LOC100129 | 0.140392 | -0.10707 | 0.653088 | 0.522016 | 0.639037 | -6.22444 |
| LOC38964  | 0.235946 | -0.04164 | 0.739418 | 0.468302 | 0.59009  | -6.22456 |
| LOC100131 | -0.15593 | 0.059723 | -0.7393  | 0.46837  | 0.590138 | -6.22465 |
| CCDC48    | -0.24636 | 0.376688 | -0.73892 | 0.468595 | 0.590346 | -6.22493 |
| FAM27E3   | -0.2897  | 0.375303 | -0.73863 | 0.468772 | 0.590531 | -6.22515 |
| DKFZP586E | -0.21354 | -0.06983 | -0.73848 | 0.468859 | 0.590603 | -6.22526 |
| CALCR     | 0.157168 | -0.35976 | 0.588075 | 0.56531  | 0.677142 | -6.22557 |
| FRG1B     | -0.2036  | 0.049041 | -0.70688 | 0.48876  | 0.608783 | -6.22567 |
| LOC100507 | -0.22223 | -0.6794  | -0.61341 | 0.5483   | 0.661987 | -6.22574 |
| FKSG2     | -0.27321 | -0.47818 | -0.4862  | 0.634423 | 0.735947 | -6.22585 |
| KLHL32    | 0.127691 | -0.45694 | 0.401204 | 0.695401 | 0.785074 | -6.22586 |
| EIF4A2    | -0.25547 | 0.02419  | -0.7376  | 0.469382 | 0.591147 | -6.22591 |
| ETAA1     | -0.22478 | -0.05203 | -0.72338 | 0.478322 | 0.599786 | -6.22591 |
| C10orf68  | 0.177024 | -0.25268 | 0.535125 | 0.599984 | 0.707857 | -6.22607 |
| TMEM170I  | -0.20233 | -0.11995 | -0.73733 | 0.46954  | 0.591205 | -6.2261  |
| CLCA1     | 0.172282 | 0.004012 | 0.705554 | 0.489564 | 0.609475 | -6.2266  |
| IARS      | 0.182699 | -0.05556 | 0.736446 | 0.470067 | 0.59182  | -6.22676 |
| CERS3     | 0.276344 | 0.18026  | 0.736365 | 0.470116 | 0.591832 | -6.22682 |
| CSTA      | -0.33807 | -0.26085 | -0.73605 | 0.470302 | 0.592002 | -6.22705 |
| BGLAP     | -0.09777 | 0.265485 | -0.73542 | 0.470681 | 0.592408 | -6.22751 |
| NONO      | -0.11447 | 0.262844 | -0.73541 | 0.470685 | 0.592408 | -6.22752 |
| PDLIM1    | -0.26046 | 0.730037 | -0.73532 | 0.470739 | 0.592437 | -6.22759 |

|           |          |          |          |          |          |          |
|-----------|----------|----------|----------|----------|----------|----------|
| LOC400084 | -0.15124 | -0.12054 | -0.735   | 0.470927 | 0.592636 | -6.22782 |
| RASSF1    | -0.14519 | 0.232066 | -0.73426 | 0.471372 | 0.593158 | -6.22837 |
| ZDHH14    | -0.14725 | 0.430748 | -0.73407 | 0.47148  | 0.593246 | -6.2285  |
| NT5DC3    | -0.22813 | 0.228604 | -0.73404 | 0.471503 | 0.593246 | -6.22853 |
| GPR135    | 0.099794 | -0.01683 | 0.733338 | 0.471919 | 0.593732 | -6.22904 |
| ZNF616    | -0.13395 | -0.03244 | -0.73326 | 0.471965 | 0.593751 | -6.22909 |
| SLC30A10  | -0.16911 | 0.059309 | -0.73287 | 0.4722   | 0.594009 | -6.22938 |
| LOC100507 | -0.37894 | 0.128777 | -0.73276 | 0.472264 | 0.594033 | -6.22946 |
| HOXD12    | 0.1907   | -0.20153 | 0.732732 | 0.47228  | 0.594033 | -6.22948 |
| HIST1H4H  | -0.37273 | 0.393016 | -0.73239 | 0.472484 | 0.594251 | -6.22973 |
| SLC28A3   | -0.34396 | -0.08629 | -0.71796 | 0.481581 | 0.602407 | -6.22982 |
| MAST3     | 0.199012 | 0.039488 | 0.731892 | 0.472782 | 0.594512 | -6.2301  |
| DDHD2     | 0.168634 | 0.020666 | 0.73158  | 0.472968 | 0.594708 | -6.23033 |
| SNRPB     | -0.10832 | 0.189237 | -0.7313  | 0.473132 | 0.594877 | -6.23053 |
| PLXNB3    | 0.306376 | 0.549701 | 0.731237 | 0.473173 | 0.594889 | -6.23058 |
| CC2D2B    | -0.39384 | 0.231359 | -0.7309  | 0.473376 | 0.595107 | -6.23083 |
| GNG3      | -0.28518 | 0.526123 | -0.6576  | 0.518736 | 0.636621 | -6.23094 |
| DEFB118   | -0.168   | 0.001144 | -0.71618 | 0.482653 | 0.603408 | -6.23109 |
| LYSMD4    | -0.17098 | 0.109174 | -0.73048 | 0.473624 | 0.595381 | -6.23113 |
| PCDHAC2   | 0.217758 | 0.068209 | 0.730145 | 0.473825 | 0.595594 | -6.23137 |
| C7orf57   | 0.373646 | 0.224188 | 0.729711 | 0.474084 | 0.595882 | -6.23169 |
| PHYH      | -0.20477 | 0.140882 | -0.72962 | 0.474138 | 0.595911 | -6.23176 |
| TYROBP    | 0.194183 | -0.291   | 0.728966 | 0.47453  | 0.596366 | -6.23223 |
| SUDS3     | 0.091185 | -0.38505 | 0.728742 | 0.474664 | 0.596458 | -6.2324  |
| TPPP      | -0.14369 | 0.126616 | -0.64049 | 0.529983 | 0.646119 | -6.23263 |
| CPN2      | 0.155358 | -0.1845  | 0.622844 | 0.541719 | 0.656549 | -6.23284 |
| RS1       | -0.14624 | 0.072753 | -0.72801 | 0.475104 | 0.59689  | -6.23293 |
| BRD1      | -0.11336 | 0.13592  | -0.72793 | 0.475149 | 0.59689  | -6.23299 |
| GPR26     | 0.209678 | -0.28785 | 0.72788  | 0.47518  | 0.59689  | -6.23302 |
| SURF6     | -0.35821 | 0.591028 | -0.72786 | 0.475191 | 0.59689  | -6.23304 |
| ZNF680    | 0.256685 | 0.088588 | 0.727406 | 0.475464 | 0.597195 | -6.23337 |
| DPY19L1P1 | 0.124759 | -0.2294  | 0.712862 | 0.484656 | 0.605172 | -6.23347 |
| GTF2H1    | -0.23369 | 0.368063 | -0.72714 | 0.475623 | 0.597356 | -6.23356 |
| CHST9     | 0.24412  | 0.146472 | 0.726817 | 0.475816 | 0.597523 | -6.2338  |
| RICTOR    | 0.263886 | -0.60955 | 0.726741 | 0.475862 | 0.597542 | -6.23385 |
| TMEM176   | 0.389254 | 0.056364 | 0.725973 | 0.476323 | 0.598082 | -6.23441 |
| TAF1A     | -0.19915 | 0.037586 | -0.72584 | 0.476399 | 0.59814  | -6.2345  |
| TMCC1     | 0.218804 | 0.150028 | 0.725716 | 0.476476 | 0.59818  | -6.2346  |
| ANO9      | 0.202754 | 0.145719 | 0.725689 | 0.476493 | 0.59818  | -6.23462 |
| LOC729737 | -0.21474 | 0.355012 | -0.72558 | 0.476556 | 0.598222 | -6.23469 |
| PHF19     | -0.1208  | 0.139787 | -0.72544 | 0.476643 | 0.598292 | -6.2348  |
| MAN1A2    | -0.18282 | -0.09307 | -0.72509 | 0.476851 | 0.598478 | -6.23505 |
| IMMP2L    | 0.219316 | -0.07835 | 0.72509  | 0.476852 | 0.598478 | -6.23505 |
| TP53INP1  | -0.20645 | -0.27998 | -0.72467 | 0.477102 | 0.598715 | -6.23535 |
| ACSS1     | -0.30277 | 0.400638 | -0.72416 | 0.477409 | 0.598985 | -6.23572 |
| MED17     | 0.268365 | 0.27159  | 0.724052 | 0.477475 | 0.599029 | -6.2358  |
| SPZ1      | -0.14238 | 0.050936 | -0.70957 | 0.486651 | 0.607005 | -6.23582 |

|           |          |          |          |          |          |          |
|-----------|----------|----------|----------|----------|----------|----------|
| PHEX      | -0.19861 | 0.035337 | -0.69224 | 0.497686 | 0.617858 | -6.23594 |
| LOC100509 | 0.142928 | -0.39671 | 0.723842 | 0.477601 | 0.599111 | -6.23596 |
| BCL2L10   | -0.15074 | -0.00558 | -0.72365 | 0.477716 | 0.599198 | -6.23609 |
| LIN28B    | 0.05685  | -0.03566 | 0.723624 | 0.477732 | 0.599198 | -6.23611 |
| PSMB10    | 0.14031  | -0.01103 | 0.723425 | 0.477851 | 0.59931  | -6.23626 |
| L3MBTL3   | 0.172055 | -0.23289 | 0.723285 | 0.477936 | 0.599377 | -6.23636 |
| LOC158863 | -0.10682 | -0.12462 | -0.72304 | 0.478083 | 0.599524 | -6.23654 |
| CLMP      | -0.17026 | -0.26001 | -0.59541 | 0.559967 | 0.672344 | -6.23674 |
| MOB3A     | -0.16928 | 0.467137 | -0.72255 | 0.478376 | 0.599814 | -6.23689 |
| CPPED1    | -0.25661 | 0.255657 | -0.722   | 0.478707 | 0.600153 | -6.23729 |
| DCDC2     | 0.114735 | -0.08962 | 0.721893 | 0.478772 | 0.600196 | -6.23737 |
| COQ10A    | 0.179494 | 0.218474 | 0.721797 | 0.47883  | 0.600219 | -6.23743 |
| KIRREL3   | 0.233091 | -0.02659 | 0.721761 | 0.478851 | 0.600219 | -6.23746 |
| HIST1H1A  | -0.19152 | 0.02649  | -0.70705 | 0.488177 | 0.608346 | -6.2376  |
| SUGP1     | -0.14238 | 0.161058 | -0.72157 | 0.478968 | 0.600327 | -6.2376  |
| TGFB3     | -0.1933  | 0.474786 | -0.72147 | 0.479025 | 0.600355 | -6.23767 |
| GALNT12   | -0.23701 | 0.104456 | -0.5473  | 0.590946 | 0.699852 | -6.2377  |
| RALBP1    | 0.148678 | -0.00063 | 0.721428 | 0.479052 | 0.600355 | -6.2377  |
| BCL11A    | -0.19058 | 0.335397 | -0.72128 | 0.479143 | 0.60043  | -6.23781 |
| BTBD9     | -0.16117 | 0.245255 | -0.72103 | 0.47929  | 0.600531 | -6.23799 |
| C11orf20  | -0.09453 | -0.08494 | -0.72103 | 0.479292 | 0.600531 | -6.23799 |
| GHDC      | -0.12059 | 0.339354 | -0.72096 | 0.479335 | 0.600531 | -6.23804 |
| GPR113    | 0.12647  | -0.10956 | 0.720939 | 0.479346 | 0.600531 | -6.23805 |
| PSAPL1    | -0.1805  | 0.054525 | -0.64647 | 0.525763 | 0.642337 | -6.23823 |
| WDR41     | 0.305835 | -0.04207 | 0.720668 | 0.479509 | 0.600572 | -6.23825 |
| ZNF880    | 0.273836 | 0.164493 | 0.72063  | 0.479532 | 0.600572 | -6.23828 |
| LOC283278 | 0.223045 | -0.17122 | 0.720323 | 0.479717 | 0.600765 | -6.2385  |
| FLNC      | -0.1969  | 0.11888  | -0.72021 | 0.479785 | 0.600803 | -6.23858 |
| LOC100507 | 0.18093  | 0.108558 | 0.720171 | 0.479809 | 0.600803 | -6.23861 |
| HS6ST2    | 0.204351 | -0.32122 | 0.565761 | 0.579997 | 0.690261 | -6.23864 |
| NNT       | 0.227645 | 0.008438 | 0.592091 | 0.562133 | 0.674161 | -6.23873 |
| OLIG3     | 0.105754 | -0.02984 | 0.719931 | 0.479953 | 0.600946 | -6.23878 |
| LOC400620 | -0.16865 | 0.117331 | -0.64555 | 0.526344 | 0.642863 | -6.23883 |
| PAIP2B    | -0.31723 | 0.481977 | -0.71982 | 0.48002  | 0.600991 | -6.23886 |
| SGK2      | -0.19852 | 0.212374 | -0.7197  | 0.480091 | 0.601042 | -6.23894 |
| LARP4B    | -0.07828 | -0.25206 | -0.7194  | 0.480275 | 0.601233 | -6.23916 |
| TTC39A    | -0.17848 | 0.10714  | -0.70484 | 0.489523 | 0.609462 | -6.23917 |
| RSPH1     | -0.21424 | 0.415621 | -0.71914 | 0.480432 | 0.601392 | -6.23935 |
| DKFZP434H | -0.12531 | -0.07164 | -0.64453 | 0.526992 | 0.643438 | -6.23949 |
| C15orf44  | 0.171785 | -0.12121 | 0.71852  | 0.480804 | 0.601813 | -6.2398  |
| DNAJB8    | 0.140528 | -0.34122 | 0.665805 | 0.51454  | 0.632848 | -6.23982 |
| C9orf47   | 0.250469 | 0.02069  | 0.718476 | 0.48083  | 0.601813 | -6.23983 |
| ATP6VOA4  | 0.110902 | -0.22773 | 0.611505 | 0.54902  | 0.662496 | -6.2399  |
| DYNLL1    | 0.120796 | -0.0721  | 0.71835  | 0.480906 | 0.601869 | -6.23992 |
| SNAI1     | -0.22397 | 0.543881 | -0.71827 | 0.480952 | 0.601889 | -6.23997 |
| MORN4     | -0.21117 | 0.126647 | -0.6289  | 0.537376 | 0.65274  | -6.24004 |
| KLK2      | 0.188506 | 0.006031 | 0.718112 | 0.481049 | 0.601972 | -6.24009 |

|           |          |          |          |          |          |          |
|-----------|----------|----------|----------|----------|----------|----------|
| GPNMB     | 0.152923 | 0.091754 | 0.717906 | 0.481174 | 0.602089 | -6.24024 |
| HOXA5     | 0.210736 | -0.02824 | 0.717642 | 0.481333 | 0.602221 | -6.24043 |
| LOC100507 | -0.15289 | -0.0043  | -0.71763 | 0.48134  | 0.602221 | -6.24044 |
| DYNLL2    | -0.15591 | -0.13689 | -0.71737 | 0.481499 | 0.602381 | -6.24062 |
| DDX20     | 0.126599 | -0.11878 | 0.717168 | 0.481619 | 0.602416 | -6.24077 |
| KIAA0894  | 0.131515 | 0.048143 | 0.702561 | 0.490909 | 0.61081  | -6.24077 |
| MBD5      | -0.27482 | 0.120886 | -0.71688 | 0.481793 | 0.602594 | -6.24097 |
| REG4      | -0.13497 | 0.060022 | -0.71682 | 0.481826 | 0.602598 | -6.24101 |
| SMARCC1   | -0.15311 | 0.14908  | -0.71639 | 0.482089 | 0.602888 | -6.24133 |
| TYRO3     | -0.08353 | -0.06492 | -0.71591 | 0.482377 | 0.60321  | -6.24167 |
| GPR180    | 0.244391 | -0.02398 | 0.715781 | 0.482456 | 0.60327  | -6.24176 |
| GABRR3    | 0.109936 | -0.193   | 0.715709 | 0.4825   | 0.603286 | -6.24181 |
| JMY       | 0.191763 | 0.002054 | 0.700914 | 0.491912 | 0.611698 | -6.24193 |
| C1orf81   | 0.169253 | -0.05287 | 0.715446 | 0.482659 | 0.603408 | -6.242   |
| NPL       | -0.21796 | 0.171484 | -0.71533 | 0.48273  | 0.603459 | -6.24209 |
| PPTC7     | -0.18897 | 0.055543 | -0.71514 | 0.482843 | 0.603562 | -6.24222 |
| TSSC1     | 0.122264 | -0.14173 | 0.71508  | 0.48288  | 0.603569 | -6.24226 |
| FOXN2     | 0.19505  | -0.20854 | 0.714573 | 0.483187 | 0.603849 | -6.24263 |
| MEGF8     | 0.132418 | 0.017484 | 0.714559 | 0.483195 | 0.603849 | -6.24264 |
| COL13A1   | 0.136156 | -0.14178 | 0.714556 | 0.483196 | 0.603849 | -6.24264 |
| HUNK      | 0.185687 | -0.13808 | 0.714201 | 0.483411 | 0.604079 | -6.24289 |
| RAB36     | -0.3214  | 0.180694 | -0.714   | 0.483531 | 0.604191 | -6.24303 |
| AMIGO1    | -0.19482 | 0.024624 | -0.71373 | 0.483695 | 0.604319 | -6.24323 |
| NHLRC4    | -0.17703 | 0.265342 | -0.71361 | 0.48377  | 0.604322 | -6.24331 |
| CISD1     | -0.20859 | 0.099861 | -0.7136  | 0.483777 | 0.604322 | -6.24332 |
| SYT5      | -0.24355 | 0.281249 | -0.71357 | 0.483791 | 0.604322 | -6.24334 |
| GAS5      | 0.297    | -0.97165 | 0.713376 | 0.48391  | 0.604433 | -6.24348 |
| TRPV3     | -0.14021 | 0.136984 | -0.71293 | 0.48418  | 0.604731 | -6.2438  |
| HRK       | -0.2492  | 0.658302 | -0.71279 | 0.484266 | 0.604799 | -6.2439  |
| DYNLT3    | 0.165118 | -0.85004 | 0.712279 | 0.484575 | 0.605147 | -6.24426 |
| SNURF     | 0.207463 | 0.083619 | 0.711962 | 0.484766 | 0.605271 | -6.24449 |
| C2orf44   | 0.195396 | 0.039063 | 0.711773 | 0.484881 | 0.605375 | -6.24462 |
| LOC649391 | -0.24322 | -0.14324 | -0.7115  | 0.485047 | 0.605544 | -6.24482 |
| HCAR3     | 0.391841 | 0.626775 | 0.711284 | 0.485177 | 0.605668 | -6.24497 |
| PTPDC1    | 0.145193 | -0.20987 | 0.711213 | 0.485221 | 0.60567  | -6.24502 |
| TBC1D16   | 0.13835  | 0.023352 | 0.71118  | 0.485241 | 0.60567  | -6.24505 |
| BTN3A3    | 0.328915 | 0.435331 | 0.711119 | 0.485278 | 0.60567  | -6.24509 |
| CACNG1    | 0.098824 | -0.04527 | 0.710869 | 0.485429 | 0.605789 | -6.24527 |
| PMFBP1    | 0.131882 | -0.34063 | 0.602098 | 0.555118 | 0.667874 | -6.24567 |
| POLR2K    | -0.1597  | -0.41568 | -0.71016 | 0.485858 | 0.606286 | -6.24577 |
| CXXC4     | 0.142876 | 0.085726 | 0.710014 | 0.485947 | 0.606359 | -6.24588 |
| IDH3B     | -0.09338 | 0.077446 | -0.70993 | 0.486001 | 0.606387 | -6.24594 |
| NAT8      | -0.12925 | -0.01825 | -0.70985 | 0.486045 | 0.606403 | -6.24599 |
| DKFZP686I | -0.22579 | 0.193124 | -0.70938 | 0.486334 | 0.606686 | -6.24633 |
| HOXA7     | 0.217266 | 0.034913 | 0.709204 | 0.486439 | 0.606779 | -6.24645 |
| KREMEN2   | 0.192692 | 0.128517 | 0.708773 | 0.486701 | 0.607028 | -6.24676 |
| PRO2949   | 0.155144 | -0.53856 | 0.551236 | 0.589662 | 0.698751 | -6.24689 |

|           |          |          |          |          |          |          |
|-----------|----------|----------|----------|----------|----------|----------|
| SPG20     | -0.35432 | 0.251893 | -0.70818 | 0.487063 | 0.607441 | -6.24718 |
| SGCZ      | -0.12586 | 0.064135 | -0.70801 | 0.487166 | 0.607531 | -6.2473  |
| THBS2     | -0.17704 | -0.01603 | -0.70765 | 0.48738  | 0.607703 | -6.24755 |
| SEPW1     | 0.157804 | -0.14114 | 0.707643 | 0.487387 | 0.607703 | -6.24756 |
| CD163     | -0.41264 | -0.16522 | -0.70763 | 0.487397 | 0.607703 | -6.24757 |
| NDUFA6    | 0.241512 | 0.260299 | 0.707247 | 0.487628 | 0.607875 | -6.24784 |
| FAM129C   | -0.28614 | 0.562856 | -0.70701 | 0.487771 | 0.608014 | -6.24801 |
| KAL1      | -0.07805 | 0.041339 | -0.70671 | 0.487953 | 0.608202 | -6.24822 |
| KIAA1377  | 0.168769 | 0.156829 | 0.706489 | 0.488089 | 0.608334 | -6.24838 |
| MUC17     | -0.15414 | 0.079675 | -0.70629 | 0.488207 | 0.608346 | -6.24851 |
| MTFR1     | -0.23773 | 0.130187 | -0.70629 | 0.48821  | 0.608346 | -6.24852 |
| ITIH5     | -0.19909 | 0.034266 | -0.70627 | 0.488223 | 0.608346 | -6.24853 |
| TAS2R60   | -0.09982 | -0.08615 | -0.70619 | 0.48827  | 0.608366 | -6.24859 |
| CTAGE7P   | -0.17702 | 0.084137 | -0.70612 | 0.488315 | 0.608384 | -6.24864 |
| S100A7A   | -0.23184 | -0.00614 | -0.70601 | 0.488377 | 0.608422 | -6.24871 |
| BCORP1    | 0.121278 | 0.072767 | 0.705877 | 0.488461 | 0.608488 | -6.24881 |
| PASK      | 0.394129 | -0.24075 | 0.705492 | 0.488695 | 0.608741 | -6.24908 |
| GPR4      | -0.12419 | 0.117858 | -0.70523 | 0.488852 | 0.608837 | -6.24926 |
| HNRNPF    | -0.11344 | -0.00443 | -0.70487 | 0.489071 | 0.609024 | -6.24952 |
| LOC147804 | 0.207797 | 0.047284 | 0.628848 | 0.536989 | 0.652472 | -6.24952 |
| DDX6      | -0.15663 | 0.124699 | -0.70482 | 0.489106 | 0.609024 | -6.24956 |
| GHRLOS    | -0.11475 | 0.00901  | -0.70477 | 0.489132 | 0.609024 | -6.24959 |
| C10orf57  | -0.26009 | 0.203078 | -0.70476 | 0.48914  | 0.609024 | -6.2496  |
| LOC100136 | 0.25552  | -0.1912  | 0.594347 | 0.560169 | 0.672423 | -6.25035 |
| ALG1L     | 0.144023 | 0.143659 | 0.703242 | 0.490066 | 0.61006  | -6.25067 |
| FAM164A   | 0.098699 | 0.035913 | 0.702792 | 0.49034  | 0.610324 | -6.25098 |
| HAUS3     | 0.044483 | -0.0089  | 0.702736 | 0.490374 | 0.610328 | -6.25102 |
| CDK8      | -0.20103 | -0.08755 | -0.7025  | 0.490516 | 0.610466 | -6.25119 |
| ZNF529    | 0.241573 | -0.08085 | 0.687324 | 0.500242 | 0.620363 | -6.25139 |
| C17orf59  | -0.08727 | 0.081527 | -0.70207 | 0.490779 | 0.610754 | -6.25149 |
| NLRP3     | -0.22775 | 0.210892 | -0.70185 | 0.490917 | 0.61081  | -6.25165 |
| GART      | -0.32436 | 0.437672 | -0.70164 | 0.491043 | 0.61091  | -6.2518  |
| LHFPL2    | -0.25459 | 0.240423 | -0.70161 | 0.49106  | 0.61091  | -6.25182 |
| PVRL4     | 0.283929 | -0.03364 | 0.70155  | 0.491098 | 0.610918 | -6.25186 |
| DNAJA3    | -0.17411 | 0.190531 | -0.70144 | 0.491164 | 0.610962 | -6.25193 |
| PDE7B     | -0.20558 | -0.2224  | -0.51999 | 0.609451 | 0.715794 | -6.25242 |
| BRAT1     | -0.1447  | 0.287233 | -0.70066 | 0.491641 | 0.611462 | -6.25248 |
| OVCA2     | -0.11305 | 0.142382 | -0.70063 | 0.49166  | 0.611462 | -6.2525  |
| HRAS      | -0.12848 | 0.252042 | -0.70032 | 0.491851 | 0.611661 | -6.25272 |
| ZNRF3     | -0.27406 | -0.1542  | -0.66732 | 0.513096 | 0.631825 | -6.25297 |
| CACNA2D1  | -0.27576 | 0.230505 | -0.68475 | 0.501827 | 0.621823 | -6.25316 |
| GIMAP1    | -0.21688 | 0.35461  | -0.69945 | 0.492378 | 0.612239 | -6.25333 |
| ZNF552    | -0.23804 | 0.473796 | -0.69915 | 0.492561 | 0.612428 | -6.25354 |
| TCF7L1    | 0.211293 | -0.07069 | 0.684187 | 0.502176 | 0.622171 | -6.25355 |
| GATA6     | 0.194639 | -0.4825  | 0.684131 | 0.502211 | 0.622175 | -6.25359 |
| CCL13     | -0.19035 | -0.17845 | -0.62163 | 0.541623 | 0.656492 | -6.25406 |
| YY1       | -0.14947 | 0.256084 | -0.69813 | 0.493187 | 0.613128 | -6.25426 |

|          |          |          |          |          |          |          |
|----------|----------|----------|----------|----------|----------|----------|
| DDOST    | 0.07807  | -0.05845 | 0.697909 | 0.493323 | 0.613219 | -6.25441 |
| PIP5K1B  | -0.20385 | 0.341229 | -0.69722 | 0.493746 | 0.613668 | -6.25489 |
| KRT7     | 0.121123 | -0.14283 | 0.695964 | 0.494514 | 0.614563 | -6.25577 |
| PDGFRL   | 0.043886 | -0.00878 | 0.695193 | 0.494987 | 0.615092 | -6.25631 |
| DUSP5    | -0.28919 | 0.423383 | -0.69497 | 0.495123 | 0.615222 | -6.25646 |
| LOC28407 | -0.14127 | -0.11647 | -0.51154 | 0.615236 | 0.720084 | -6.25683 |
| LRRC14   | -0.13668 | 0.261353 | -0.6943  | 0.495532 | 0.615692 | -6.25693 |
| SLC39A3  | -0.13381 | 0.374779 | -0.69404 | 0.495692 | 0.615852 | -6.25711 |
| PPP1R2P9 | -0.09169 | 0.010291 | -0.67879 | 0.505515 | 0.624907 | -6.25725 |
| OR2S2    | -0.17209 | 0.081704 | -0.67878 | 0.505517 | 0.624907 | -6.25725 |
| MLL      | 0.149971 | 0.303527 | 0.693806 | 0.495838 | 0.615993 | -6.25727 |
| MMRN1    | 0.221785 | 0.036422 | 0.616193 | 0.545131 | 0.659258 | -6.25745 |
| TMIE     | 0.26357  | -0.08059 | 0.678473 | 0.50571  | 0.624969 | -6.25746 |
| PAFAH2   | -0.18916 | 0.481791 | -0.69343 | 0.49607  | 0.616196 | -6.25753 |
| OSBPL10  | 0.218821 | 0.334748 | 0.69342  | 0.496075 | 0.616196 | -6.25754 |
| KLHDC1   | -0.16948 | -0.20941 | -0.69339 | 0.496096 | 0.616196 | -6.25756 |
| SFRP4    | 0.136089 | -0.00417 | 0.677168 | 0.506519 | 0.625676 | -6.25835 |
| ARHGEF9  | -0.20108 | 0.39616  | -0.69204 | 0.496923 | 0.617185 | -6.2585  |
| PRKAR1B  | -0.21541 | 0.425358 | -0.69184 | 0.497047 | 0.6173   | -6.25864 |
| TMTC4    | -0.29956 | 0.164748 | -0.69173 | 0.497112 | 0.617341 | -6.25871 |
| SESN2    | -0.15006 | 0.012028 | -0.69138 | 0.49733  | 0.617573 | -6.25896 |
| PPIC     | -0.16456 | 0.129475 | -0.69116 | 0.497463 | 0.617689 | -6.25911 |
| RPH3A    | 0.414356 | 0.97019  | 0.691122 | 0.497487 | 0.617689 | -6.25914 |
| DERL2    | -0.11014 | -0.27351 | -0.69102 | 0.497548 | 0.617726 | -6.2592  |
| HADH     | -0.1446  | 0.202069 | -0.69069 | 0.497755 | 0.617904 | -6.25944 |
| DHX15    | -0.19201 | -0.09873 | -0.69031 | 0.497984 | 0.61815  | -6.2597  |
| ATG4D    | 0.131453 | 0.160153 | 0.675156 | 0.507768 | 0.626762 | -6.25972 |
| LOC10028 | 0.187285 | 0.198927 | 0.68999  | 0.498183 | 0.618313 | -6.25992 |
| PRIM1    | -0.21467 | -0.10374 | -0.68996 | 0.498203 | 0.618313 | -6.25994 |
| SYT3     | -0.10671 | 0.069296 | -0.68995 | 0.49821  | 0.618313 | -6.25995 |
| AGTR2    | 0.145196 | 0.024632 | 0.674784 | 0.507999 | 0.627007 | -6.25997 |
| FKSG83   | -0.14184 | -0.06765 | -0.68976 | 0.498322 | 0.618413 | -6.26008 |
| TSPAN16  | 0.175547 | 0.11564  | 0.67452  | 0.508164 | 0.62717  | -6.26015 |
| TGIF1    | 0.159158 | 0.194955 | 0.689632 | 0.498403 | 0.618474 | -6.26017 |
| FAM69C   | -0.04284 | -0.00197 | -0.68947 | 0.498503 | 0.618559 | -6.26028 |
| ARHGEF5  | -0.18739 | 0.335702 | -0.68941 | 0.498542 | 0.618568 | -6.26032 |
| COX5B    | 0.145329 | -0.25844 | 0.689189 | 0.498676 | 0.61867  | -6.26047 |
| APPL1    | -0.22233 | 0.016037 | -0.68917 | 0.498687 | 0.61867  | -6.26048 |
| LPAR6    | -0.32908 | -0.75706 | -0.61114 | 0.548404 | 0.662072 | -6.26058 |
| ANGPTL3  | 0.116903 | 0.073834 | 0.610989 | 0.548498 | 0.662145 | -6.26067 |
| AGPAT1   | 0.123046 | 0.193752 | 0.688838 | 0.498892 | 0.618885 | -6.26072 |
| TSPAN19  | 0.150786 | -0.06752 | 0.688375 | 0.499177 | 0.6192   | -6.26103 |
| MAN1C1   | -0.3955  | 0.872315 | -0.68735 | 0.499806 | 0.619941 | -6.26174 |
| S100A4   | 0.215383 | -0.20546 | 0.686938 | 0.500063 | 0.62022  | -6.26203 |
| PDS5A    | -0.3158  | 0.243855 | -0.68676 | 0.500175 | 0.620319 | -6.26215 |
| PARVA    | -0.16123 | -0.05584 | -0.67125 | 0.510199 | 0.629039 | -6.26236 |
| ZNF639   | -0.19606 | -0.16288 | -0.67121 | 0.510223 | 0.629039 | -6.26239 |

|           |          |          |          |          |          |          |
|-----------|----------|----------|----------|----------|----------|----------|
| NTPCR     | 0.156835 | -0.24396 | 0.686381 | 0.500407 | 0.620518 | -6.26241 |
| EGF       | -0.2646  | 0.715457 | -0.68634 | 0.50043  | 0.620518 | -6.26244 |
| ZNF43     | 0.101801 | -0.09133 | 0.607987 | 0.550447 | 0.663802 | -6.26251 |
| EFNB3     | -0.16561 | -0.0074  | -0.68585 | 0.500737 | 0.620859 | -6.26278 |
| SLC6A16   | 0.119643 | -0.12171 | 0.685697 | 0.500829 | 0.620934 | -6.26288 |
| RBM19     | -0.23983 | 0.59707  | -0.68558 | 0.500901 | 0.620985 | -6.26296 |
| ZSWIM2    | -0.22062 | -0.25964 | -0.67028 | 0.510804 | 0.629556 | -6.26301 |
| CAND1     | -0.20137 | -0.09699 | -0.68504 | 0.501234 | 0.621318 | -6.26333 |
| OLR1      | 0.460564 | 0.141121 | 0.684963 | 0.501282 | 0.621339 | -6.26338 |
| ANKRD20A  | -0.1146  | -0.00376 | -0.66954 | 0.511266 | 0.630047 | -6.26351 |
| LEFTY2    | -0.1663  | 0.173137 | -0.68452 | 0.501554 | 0.621609 | -6.26369 |
| CSTF2T    | -0.29796 | 0.384544 | -0.68451 | 0.501563 | 0.621609 | -6.2637  |
| FBRS      | -0.12026 | 0.351111 | -0.68414 | 0.50179  | 0.621823 | -6.26395 |
| C10orf136 | 0.063964 | 0.016639 | 0.684074 | 0.501831 | 0.621823 | -6.26399 |
| ASPDH     | 0.07978  | -0.02986 | 0.683553 | 0.502154 | 0.622171 | -6.26435 |
| TUBA1B    | -0.11262 | 0.096781 | -0.68328 | 0.502321 | 0.622273 | -6.26454 |
| TTC12     | -0.2569  | 0.221826 | -0.68286 | 0.502585 | 0.622559 | -6.26483 |
| TMEM102   | 0.147107 | 0.053607 | 0.682581 | 0.502755 | 0.622731 | -6.26502 |
| GPR143    | -0.21771 | 0.143884 | -0.68249 | 0.502809 | 0.622759 | -6.26508 |
| EVI5L     | 0.148647 | -0.14013 | 0.682229 | 0.502972 | 0.622921 | -6.26526 |
| DIS3L2    | 0.204271 | -0.0636  | 0.681995 | 0.503117 | 0.623027 | -6.26542 |
| CHL1      | -0.18683 | -0.10552 | -0.68199 | 0.503121 | 0.623027 | -6.26542 |
| LOC100501 | -0.08328 | 0.043464 | -0.66649 | 0.51317  | 0.631876 | -6.26556 |
| STRN4     | -0.09736 | 0.270945 | -0.68129 | 0.503554 | 0.623484 | -6.2659  |
| LINC00317 | -0.21185 | -0.20154 | -0.68113 | 0.503653 | 0.623542 | -6.26601 |
| NHSL1     | -0.15406 | 0.171113 | -0.68111 | 0.503664 | 0.623542 | -6.26602 |
| SPANXA2-C | 0.145691 | -0.40937 | 0.647284 | 0.525679 | 0.642314 | -6.26622 |
| CCDC97    | -0.09955 | 0.170237 | -0.68074 | 0.503894 | 0.623787 | -6.26628 |
| C21orf71  | 0.183884 | -0.21758 | 0.680507 | 0.504038 | 0.623926 | -6.26644 |
| KDM5D     | -0.79516 | -0.55063 | -0.68024 | 0.504201 | 0.624052 | -6.26661 |
| GPR133    | -0.1595  | 0.204821 | -0.68024 | 0.504204 | 0.624052 | -6.26662 |
| LOC64559  | 0.194061 | -0.01279 | 0.679845 | 0.504448 | 0.624315 | -6.26689 |
| HOXC10    | -0.09514 | -0.29954 | -0.6643  | 0.514539 | 0.632848 | -6.26702 |
| L3MBTL4   | -0.18956 | 0.155689 | -0.67963 | 0.504582 | 0.624377 | -6.26703 |
| DCAF4     | -0.25959 | 0.508698 | -0.67961 | 0.504593 | 0.624377 | -6.26705 |
| NDUFB7    | 0.130705 | -0.15675 | 0.679487 | 0.504671 | 0.624383 | -6.26713 |
| KLF15     | 0.268126 | 0.160875 | 0.67945  | 0.504694 | 0.624383 | -6.26716 |
| LILRB4    | 0.086621 | -0.05009 | 0.679347 | 0.504757 | 0.624404 | -6.26723 |
| TYR       | -0.14036 | 0.026793 | -0.67928 | 0.504798 | 0.624404 | -6.26727 |
| QTRTD1    | -0.08606 | -0.01349 | -0.67927 | 0.504807 | 0.624404 | -6.26728 |
| SPAG8     | 0.206087 | -0.23863 | 0.599964 | 0.555669 | 0.668372 | -6.26739 |
| HSD17B11  | -0.25006 | 0.012386 | -0.67903 | 0.504953 | 0.624546 | -6.26744 |
| TAF1B     | -0.15988 | -0.04575 | -0.67894 | 0.505009 | 0.624575 | -6.2675  |
| TMEFF1    | -0.22441 | 0.292385 | -0.66349 | 0.515043 | 0.633307 | -6.26756 |
| ADAMTS17  | 0.159841 | -0.06205 | 0.583823 | 0.566639 | 0.67836  | -6.2676  |
| QPCTL     | -0.31584 | 0.270594 | -0.66341 | 0.515095 | 0.633331 | -6.26762 |
| CDK9      | -0.15436 | 0.233555 | -0.67866 | 0.505182 | 0.62475  | -6.26769 |

|            |          |          |          |          |          |          |
|------------|----------|----------|----------|----------|----------|----------|
| SLC19A1    | -0.16829 | 0.349166 | -0.67859 | 0.505224 | 0.624762 | -6.26774 |
| IZUMO2     | 0.137343 | -0.19974 | 0.678326 | 0.505391 | 0.624885 | -6.26792 |
| ASCC3      | 0.239748 | 0.05475  | 0.67828  | 0.505419 | 0.624885 | -6.26795 |
| IFI44      | -0.67316 | 0.13826  | -0.6781  | 0.505533 | 0.624907 | -6.26808 |
| ELP4       | -0.17781 | 0.131536 | -0.67796 | 0.505616 | 0.624941 | -6.26817 |
| EIF2B5     | -0.12905 | 0.241379 | -0.67795 | 0.505624 | 0.624941 | -6.26818 |
| EDNRA      | -0.08501 | -0.06358 | -0.67785 | 0.505686 | 0.624969 | -6.26825 |
| ERVV-1     | -0.0959  | -0.08222 | -0.58243 | 0.567553 | 0.679247 | -6.26841 |
| RHOBTB3    | -0.2022  | 0.143286 | -0.66212 | 0.5159   | 0.634096 | -6.26847 |
| CDH5       | -0.14233 | -0.03583 | -0.67738 | 0.505977 | 0.62526  | -6.26857 |
| BEND3      | 0.219561 | 0.134823 | 0.677092 | 0.506157 | 0.625402 | -6.26876 |
| FAM19A5    | -0.13693 | 0.045899 | -0.6769  | 0.506277 | 0.625512 | -6.26889 |
| TMEM61     | -0.11266 | 0.001271 | -0.67671 | 0.506393 | 0.625582 | -6.26902 |
| MAGEE1     | 0.132594 | -0.25441 | 0.676705 | 0.506397 | 0.625582 | -6.26902 |
| TRAF3IP2-/ | -0.3065  | 0.293969 | -0.67648 | 0.506538 | 0.625676 | -6.26918 |
| DNAJC27    | -0.17876 | 0.227833 | -0.67585 | 0.50693  | 0.626082 | -6.26961 |
| SLC7A3     | -0.1704  | 0.276401 | -0.67572 | 0.50701  | 0.626141 | -6.26969 |
| PXDN       | 0.061175 | -0.03955 | 0.675625 | 0.507068 | 0.626174 | -6.26976 |
| EPS8       | 0.217256 | -0.20758 | 0.675236 | 0.50731  | 0.626432 | -6.27002 |
| OSGIN2     | 0.30549  | 0.24714  | 0.675133 | 0.507374 | 0.626472 | -6.27009 |
| PPM1J      | 0.137789 | -0.00749 | 0.674957 | 0.507484 | 0.626568 | -6.27021 |
| RNFT2      | 0.194427 | 0.176862 | 0.674712 | 0.507636 | 0.626716 | -6.27038 |
| RRM1       | -0.18135 | 0.164147 | -0.67457 | 0.507722 | 0.626762 | -6.27047 |
| BTNL9      | -0.15387 | 0.014135 | -0.67451 | 0.507764 | 0.626762 | -6.27052 |
| DEFA1      | -0.37877 | 0.603923 | -0.53605 | 0.599357 | 0.7075   | -6.2708  |
| SAMM50     | 0.119053 | -0.15712 | 0.673262 | 0.508538 | 0.627593 | -6.27136 |
| Sep-10     | 0.142085 | -0.45943 | 0.639017 | 0.530921 | 0.646863 | -6.27158 |
| MICALL1    | -0.18243 | 0.439212 | -0.6729  | 0.508767 | 0.627835 | -6.2716  |
| SRPX       | -0.17643 | -0.2355  | -0.67283 | 0.508804 | 0.627843 | -6.27165 |
| LINC00266  | 0.188649 | 0.008302 | 0.638739 | 0.531097 | 0.647038 | -6.27176 |
| CAMTA1     | 0.093666 | -0.03907 | 0.672641 | 0.508925 | 0.627951 | -6.27178 |
| ZNF35      | 0.415551 | 0.287301 | 0.672591 | 0.508957 | 0.627951 | -6.27181 |
| GABRB1     | -0.09073 | -0.30553 | -0.18126 | 0.859498 | 0.910817 | -6.27185 |
| IGFL2      | 0.094354 | -0.06143 | 0.672418 | 0.509064 | 0.628045 | -6.27193 |
| GLYAT      | -0.03532 | -0.50143 | -0.12439 | 0.902927 | 0.942979 | -6.27197 |
| TMEM100    | -0.14987 | -0.26542 | -0.46372 | 0.648779 | 0.747643 | -6.27209 |
| PP2672     | -0.14379 | 0.049619 | -0.65658 | 0.519378 | 0.637204 | -6.27215 |
| CADM1      | -0.15294 | 0.039363 | -0.67193 | 0.509371 | 0.628384 | -6.27226 |
| EME1       | -0.17438 | 0.483372 | -0.67127 | 0.50978  | 0.62878  | -6.2727  |
| APOBEC3H   | -0.24618 | 0.321182 | -0.67123 | 0.509806 | 0.62878  | -6.27273 |
| ZNF473     | -0.09839 | 0.221702 | -0.6712  | 0.509821 | 0.62878  | -6.27275 |
| MOSPD1     | -0.21175 | 0.311616 | -0.59091 | 0.561593 | 0.67376  | -6.27282 |
| AHCYL1     | -0.12335 | 0.055306 | -0.67106 | 0.50991  | 0.628831 | -6.27284 |
| HNRNPA0    | 0.20648  | -0.02855 | 0.670949 | 0.50998  | 0.628857 | -6.27292 |
| SLC6A3     | 0.047556 | 0.006518 | 0.655253 | 0.520216 | 0.637773 | -6.27302 |
| SIN3B      | 0.15656  | -0.14227 | 0.670767 | 0.510093 | 0.628958 | -6.27304 |
| CES2       | 0.104769 | -0.17162 | 0.670271 | 0.510403 | 0.629221 | -6.27337 |



|           |          |          |          |          |          |          |
|-----------|----------|----------|----------|----------|----------|----------|
| NDUFS5    | 0.200114 | -0.21773 | 0.670142 | 0.510483 | 0.629272 | -6.27346 |
| TOLLIP    | 0.098564 | 0.059138 | 0.670008 | 0.510567 | 0.629304 | -6.27355 |
| C18orf18  | 0.148923 | 0.052315 | 0.654389 | 0.52076  | 0.638161 | -6.27359 |
| ANKRD35   | -0.26725 | 0.308712 | -0.66919 | 0.511076 | 0.629852 | -6.2741  |
| CDH19     | -0.19384 | -0.40816 | -0.58818 | 0.563385 | 0.67529  | -6.27444 |
| IFNA6     | 0.245543 | -0.15368 | 0.653065 | 0.521594 | 0.638718 | -6.27446 |
| HEPN1     | 0.216051 | -0.30604 | 0.611609 | 0.548953 | 0.662496 | -6.27475 |
| MDM1      | 0.152512 | 0.091507 | 0.668118 | 0.511747 | 0.6306   | -6.27482 |
| LOC100130 | 0.171609 | -0.1635  | 0.571378 | 0.574862 | 0.685399 | -6.27486 |
| KIF1A     | -0.0876  | -0.00037 | -0.66786 | 0.511907 | 0.630742 | -6.27499 |
| ARHGDIB   | -0.10123 | 0.152455 | -0.66783 | 0.511926 | 0.630742 | -6.27501 |
| ND4       | -0.23477 | 0.743126 | -0.66738 | 0.51221  | 0.630981 | -6.27532 |
| LOC100193 | 0.262848 | 0.13457  | 0.667366 | 0.512217 | 0.630981 | -6.27532 |
| RAB9BP1   | 0.167562 | 0.018875 | 0.65172  | 0.522443 | 0.639437 | -6.27535 |
| OLIG1     | -0.24622 | 0.23223  | -0.66714 | 0.512361 | 0.631118 | -6.27548 |
| LOC653583 | -0.1183  | -0.3289  | -0.43494 | 0.669461 | 0.764161 | -6.27549 |
| HTR3B     | 0.114072 | -0.12951 | 0.666918 | 0.512497 | 0.631246 | -6.27562 |
| KRT5      | 0.240204 | 0.036588 | 0.632655 | 0.534973 | 0.650668 | -6.27566 |
| GBX1      | 0.223553 | 0.106489 | 0.632576 | 0.535024 | 0.65069  | -6.27571 |
| C11orf44  | -0.09439 | -0.10907 | -0.65087 | 0.522978 | 0.639972 | -6.2759  |
| HCP5B     | -0.17037 | 0.11191  | -0.63221 | 0.53526  | 0.650815 | -6.27595 |
| LOC100123 | 0.148089 | -0.2659  | 0.666361 | 0.512846 | 0.631636 | -6.276   |
| FAM41C    | -0.14994 | -0.04919 | -0.66614 | 0.512987 | 0.631743 | -6.27615 |
| KCNC2     | 0.151439 | -0.15948 | 0.666119 | 0.512997 | 0.631743 | -6.27616 |
| KCNAB1    | -0.1331  | -0.19485 | -0.65034 | 0.523313 | 0.640262 | -6.27625 |
| NANP      | 0.19232  | -0.36141 | 0.549223 | 0.590051 | 0.699051 | -6.27647 |
| SDR39U1   | 0.136399 | -0.07586 | 0.665443 | 0.51342  | 0.632145 | -6.27661 |
| TRPV1     | 0.132377 | 0.157532 | 0.665233 | 0.513552 | 0.632267 | -6.27675 |
| TGM7      | 0.090241 | -0.13012 | 0.665123 | 0.51362  | 0.632269 | -6.27683 |
| NES       | 0.11343  | -0.14882 | 0.665092 | 0.51364  | 0.632269 | -6.27685 |
| DEFA5     | 0.172331 | -0.05869 | 0.665076 | 0.51365  | 0.632269 | -6.27686 |
| TCL1A     | -0.31291 | 0.326436 | -0.665   | 0.513697 | 0.632288 | -6.27691 |
| AIFM3     | 0.244639 | 0.135617 | 0.66486  | 0.513785 | 0.632356 | -6.277   |
| AASS      | 0.153284 | -0.15216 | 0.664648 | 0.513918 | 0.63248  | -6.27714 |
| CHCHD8    | 0.1562   | -0.06725 | 0.6645   | 0.514011 | 0.632507 | -6.27724 |
| YLPM1     | -0.24336 | 0.070086 | -0.66449 | 0.51402  | 0.632507 | -6.27725 |
| LOC440283 | -0.20137 | 0.07708  | -0.66443 | 0.514055 | 0.632507 | -6.27729 |
| PAK1      | 0.227521 | 0.01298  | 0.664406 | 0.51407  | 0.632507 | -6.2773  |
| ANGPTL7   | 0.142717 | 0.058067 | 0.648527 | 0.524461 | 0.641426 | -6.27744 |
| TBC1D8B   | -0.17135 | -0.01823 | -0.66418 | 0.514214 | 0.632576 | -6.27746 |
| KBTBD11   | 0.146932 | -0.44252 | 0.664163 | 0.514222 | 0.632576 | -6.27747 |
| CES1      | 0.391981 | -0.17503 | 0.663901 | 0.514386 | 0.632738 | -6.27764 |
| SCOC      | -0.19969 | 0.033985 | -0.66347 | 0.514655 | 0.632949 | -6.27793 |
| RNF123    | 0.177485 | 0.31377  | 0.663316 | 0.514753 | 0.63303  | -6.27803 |
| IAPP      | 0.145157 | -0.12313 | 0.663198 | 0.514826 | 0.633081 | -6.27811 |
| CAMLG     | -0.11325 | -0.02172 | -0.66269 | 0.515144 | 0.633352 | -6.27845 |
| PRELID2   | 0.267245 | 0.150299 | 0.66227  | 0.515409 | 0.633638 | -6.27873 |

|           |          |          |          |          |          |          |
|-----------|----------|----------|----------|----------|----------|----------|
| CPO       | -0.10282 | -0.09913 | -0.64653 | 0.525727 | 0.642333 | -6.27874 |
| HIC2      | 0.145522 | 0.068502 | 0.661897 | 0.515642 | 0.633877 | -6.27897 |
| PTPN18    | 0.128099 | 0.097596 | 0.661857 | 0.515668 | 0.633877 | -6.279   |
| WFDC6     | 0.105791 | 0.029867 | 0.646097 | 0.525999 | 0.642505 | -6.27902 |
| REXO4     | -0.23237 | 0.765233 | -0.66147 | 0.515911 | 0.634096 | -6.27926 |
| ETV3      | -0.09821 | -0.1135  | -0.66128 | 0.516028 | 0.6342   | -6.27938 |
| NODAL     | 0.117013 | -0.05571 | 0.645485 | 0.526387 | 0.642863 | -6.27942 |
| PLEKHA5   | -0.15849 | -0.06729 | -0.64548 | 0.52639  | 0.642863 | -6.27942 |
| CNPY2     | -0.14566 | 0.109663 | -0.66116 | 0.516104 | 0.634254 | -6.27946 |
| KCNMB4    | -0.2076  | 0.573538 | -0.6611  | 0.516144 | 0.634263 | -6.27951 |
| SRSF4     | -0.106   | 0.221465 | -0.66089 | 0.516277 | 0.634387 | -6.27965 |
| MSH2      | -0.26866 | 0.105684 | -0.66073 | 0.516375 | 0.634435 | -6.27975 |
| ZFP37     | 0.041219 | -0.00824 | 0.66072  | 0.516381 | 0.634435 | -6.27976 |
| LSM11     | -0.11564 | 0.272703 | -0.66044 | 0.516561 | 0.634616 | -6.27995 |
| PPP1R1A   | -0.09304 | 0.002646 | -0.66033 | 0.516627 | 0.634658 | -6.28002 |
| F8        | -0.12906 | -0.33861 | -0.66013 | 0.516754 | 0.634774 | -6.28015 |
| PRUNE2    | -0.27216 | -0.21023 | -0.62542 | 0.539602 | 0.654753 | -6.28025 |
| GABRA2    | 0.166794 | -0.00365 | 0.659617 | 0.517075 | 0.635112 | -6.28049 |
| TRIML2    | 0.090658 | -0.18543 | 0.659586 | 0.517094 | 0.635112 | -6.28051 |
| MYL5      | 0.16515  | -0.07554 | 0.659501 | 0.517148 | 0.635138 | -6.28057 |
| PWP2      | -0.11117 | 0.17195  | -0.65906 | 0.517424 | 0.635437 | -6.28086 |
| VKORC1    | 0.067491 | -0.06319 | 0.658971 | 0.517481 | 0.635467 | -6.28092 |
| LOC100130 | -0.15532 | 0.160477 | -0.65881 | 0.517581 | 0.63554  | -6.28102 |
| NFATC3    | -0.1451  | 0.170487 | -0.65872 | 0.517637 | 0.63554  | -6.28108 |
| OR2H2     | -0.1082  | -0.16177 | -0.65778 | 0.51823  | 0.636228 | -6.2817  |
| MED31     | -0.12589 | -0.17607 | -0.65746 | 0.518432 | 0.636436 | -6.28192 |
| ST7       | 0.155787 | 0.344022 | 0.65715  | 0.518627 | 0.63657  | -6.28212 |
| UNC93B1   | -0.11326 | 0.012155 | -0.65713 | 0.518638 | 0.63657  | -6.28213 |
| GKAP1     | 0.190258 | -0.17487 | 0.657131 | 0.518639 | 0.63657  | -6.28213 |
| UBE2E3    | 0.140506 | -0.04477 | 0.656962 | 0.518745 | 0.636621 | -6.28224 |
| NEXN-AS1  | 0.253658 | 0.165834 | 0.656583 | 0.518983 | 0.636837 | -6.28249 |
| TLCD2     | 0.212398 | -0.22903 | 0.656579 | 0.518986 | 0.636837 | -6.2825  |
| DNER      | -0.07537 | 0.013328 | -0.65607 | 0.519304 | 0.637187 | -6.28283 |
| DACT3     | 0.164185 | -0.06232 | 0.655949 | 0.519383 | 0.637204 | -6.28291 |
| KIR2DS1   | 0.312068 | 0.460632 | 0.655751 | 0.519508 | 0.637318 | -6.28304 |
| CNKSR1    | -0.07937 | 0.080445 | -0.65565 | 0.51957  | 0.637352 | -6.28311 |
| LOC100131 | -0.12525 | -0.20883 | -0.6556  | 0.519601 | 0.637352 | -6.28314 |
| ITGB5     | 0.270426 | 0.37242  | 0.655482 | 0.519677 | 0.637403 | -6.28322 |
| B4GALT2   | -0.23933 | 0.970487 | -0.65541 | 0.519722 | 0.637403 | -6.28327 |
| TIGD2     | 0.155646 | -0.07514 | 0.573088 | 0.573353 | 0.684392 | -6.28328 |
| LTC4S     | 0.172763 | -0.02809 | 0.655382 | 0.51974  | 0.637403 | -6.28329 |
| LEMD1     | 0.140704 | 0.07226  | 0.655172 | 0.519872 | 0.637525 | -6.28342 |
| FAM106CP  | -0.21217 | 0.295135 | -0.65508 | 0.519931 | 0.637557 | -6.28349 |
| GJA10     | -0.2095  | 0.326952 | -0.63916 | 0.530406 | 0.646518 | -6.28351 |
| CCDC74B   | 0.247571 | 0.16805  | 0.654583 | 0.520244 | 0.637773 | -6.28381 |
| POLR2H    | 0.139439 | 0.201147 | 0.572145 | 0.573979 | 0.684972 | -6.28383 |
| LRP5      | -0.10262 | 0.227598 | -0.65456 | 0.520261 | 0.637773 | -6.28383 |

|          |          |          |          |          |          |          |
|----------|----------|----------|----------|----------|----------|----------|
| KLHL4    | -0.15547 | -0.08641 | -0.65455 | 0.520266 | 0.637773 | -6.28384 |
| CSDE1    | -0.12613 | -0.08254 | -0.65454 | 0.52027  | 0.637773 | -6.28384 |
| KPNA1    | 0.202532 | 0.159164 | 0.654184 | 0.520496 | 0.63801  | -6.28407 |
| SLFN5    | 0.202452 | 0.194167 | 0.571571 | 0.57436  | 0.685087 | -6.28416 |
| FBXO2    | 0.139426 | -0.16112 | 0.654044 | 0.520584 | 0.638078 | -6.28417 |
| SPEN     | -0.32965 | 0.725749 | -0.65386 | 0.520703 | 0.638147 | -6.28429 |
| LOC28480 | 0.197574 | -0.07002 | 0.653852 | 0.520705 | 0.638147 | -6.28429 |
| CXCR1    | -0.20655 | 0.282799 | -0.65373 | 0.520781 | 0.638161 | -6.28437 |
| LOC64340 | -0.10154 | -0.003   | -0.65336 | 0.521015 | 0.638386 | -6.28462 |
| C9orf82  | -0.22092 | 0.187386 | -0.63743 | 0.531507 | 0.647377 | -6.28462 |
| TOP3A    | 0.193425 | 0.160542 | 0.653267 | 0.521074 | 0.638386 | -6.28468 |
| SMAD9    | -0.15269 | 0.106798 | -0.65326 | 0.52108  | 0.638386 | -6.28468 |
| MRPL42   | -0.18973 | -0.24375 | -0.65323 | 0.521095 | 0.638386 | -6.2847  |
| CCR7     | 0.34014  | 0.215483 | 0.653105 | 0.521176 | 0.638406 | -6.28478 |
| SEMA3B   | -0.18477 | 0.291247 | -0.6531  | 0.521177 | 0.638406 | -6.28478 |
| FCRL3    | -0.18204 | 0.758448 | -0.6528  | 0.521369 | 0.638601 | -6.28498 |
| SV2A     | -0.13729 | 0.109219 | -0.65274 | 0.521406 | 0.638607 | -6.28502 |
| ZNF658   | 0.184364 | -0.84646 | 0.652644 | 0.521468 | 0.638642 | -6.28509 |
| C9orf53  | -0.16612 | -0.33151 | -0.59453 | 0.560053 | 0.672382 | -6.28517 |
| CHP      | -0.1463  | 0.181499 | -0.65249 | 0.521567 | 0.638718 | -6.28519 |
| CIDECP   | -0.09778 | 0.092904 | -0.65213 | 0.521795 | 0.638923 | -6.28543 |
| MTHFD1   | 0.156292 | 0.061285 | 0.652005 | 0.521871 | 0.638977 | -6.28551 |
| SLC41A2  | -0.16478 | -0.04979 | -0.61685 | 0.545114 | 0.659258 | -6.28562 |
| RASL10A  | -0.14635 | 0.256636 | -0.65181 | 0.521997 | 0.639037 | -6.28564 |
| MMP10    | -0.14275 | 0.214533 | -0.63582 | 0.532532 | 0.648383 | -6.28565 |
| TPH2     | 0.07015  | -0.04731 | 0.651772 | 0.522018 | 0.639037 | -6.28566 |
| ZNF673   | -0.18555 | 0.003178 | -0.65148 | 0.522201 | 0.639221 | -6.28585 |
| RIOK3    | 0.167898 | -0.23223 | 0.651371 | 0.522272 | 0.639267 | -6.28592 |
| IFT140   | -0.2014  | 0.553649 | -0.65098 | 0.522522 | 0.639494 | -6.28618 |
| AMMECR1  | -0.21029 | 0.061373 | -0.65029 | 0.522958 | 0.639972 | -6.28663 |
| USP41    | -0.30777 | 0.423798 | -0.6501  | 0.523073 | 0.640014 | -6.28675 |
| CDC27    | -0.09929 | -0.16725 | -0.6501  | 0.523078 | 0.640014 | -6.28675 |
| SPATA12  | 0.093341 | -0.14361 | 0.649611 | 0.523385 | 0.640277 | -6.28707 |
| LOC73010 | 0.206111 | -0.00169 | 0.649602 | 0.52339  | 0.640277 | -6.28708 |
| SLC5A4   | -0.12685 | -0.26271 | -0.56223 | 0.581815 | 0.691878 | -6.28724 |
| DEFB126  | 0.213044 | -0.11088 | 0.632982 | 0.534344 | 0.65008  | -6.28746 |
| CLECL1   | -0.12757 | -0.28227 | -0.28799 | 0.777943 | 0.85128  | -6.28777 |
| PLP1     | 0.132649 | -0.12549 | 0.565247 | 0.578567 | 0.688978 | -6.28779 |
| SEH1L    | 0.173612 | -0.16526 | 0.648318 | 0.524203 | 0.641151 | -6.28791 |
| SELPLG   | -0.12159 | 0.072259 | -0.64778 | 0.524543 | 0.641486 | -6.28826 |
| IMPDH2   | 0.145726 | -0.189   | 0.647596 | 0.524661 | 0.641583 | -6.28839 |
| KLRC2    | 0.182999 | -0.14623 | 0.647554 | 0.524687 | 0.641583 | -6.28841 |
| ODF1     | -0.24275 | 0.294342 | -0.56408 | 0.579344 | 0.689693 | -6.28845 |
| OR11H12  | -0.20537 | -0.10049 | -0.64748 | 0.524735 | 0.641601 | -6.28846 |
| ALS2CR11 | 0.198143 | -0.17995 | 0.647331 | 0.524829 | 0.641676 | -6.28856 |
| FDX1     | -0.14091 | 0.055507 | -0.64718 | 0.524925 | 0.64172  | -6.28866 |
| ZNF528   | 0.19719  | 0.028628 | 0.64717  | 0.52493  | 0.64172  | -6.28866 |

|           |          |          |          |          |          |          |
|-----------|----------|----------|----------|----------|----------|----------|
| LOC73227! | 0.24115  | -0.04742 | 0.646913 | 0.525093 | 0.64187  | -6.28883 |
| CCNK      | 0.326887 | -0.02304 | 0.646873 | 0.525119 | 0.64187  | -6.28886 |
| PLAC1     | 0.162674 | -0.38105 | 0.630698 | 0.535805 | 0.651316 | -6.28892 |
| DEPDC4    | -0.11175 | 0.011931 | -0.64667 | 0.525247 | 0.641987 | -6.28899 |
| LOC100121 | 0.104571 | 0.126776 | 0.64648  | 0.525368 | 0.642095 | -6.28911 |
| CDC45     | -0.16076 | -0.04722 | -0.64639 | 0.525426 | 0.642125 | -6.28917 |
| GRIA4     | 0.151708 | -0.15934 | 0.64628  | 0.525495 | 0.64217  | -6.28924 |
| DAP       | -0.11356 | 0.163219 | -0.64614 | 0.525581 | 0.642235 | -6.28933 |
| CBX3P2    | -0.09218 | 0.016981 | -0.56197 | 0.580753 | 0.690993 | -6.28965 |
| SCAMPER   | 0.133123 | -0.15155 | 0.645611 | 0.525919 | 0.642488 | -6.28968 |
| SLC6A12   | 0.200933 | 0.3941   | 0.645546 | 0.525961 | 0.642498 | -6.28972 |
| WISP3     | 0.113647 | -0.08721 | 0.561549 | 0.581034 | 0.691201 | -6.28989 |
| HYAL3     | 0.224537 | -0.00774 | 0.644529 | 0.526606 | 0.643086 | -6.29038 |
| FLJ40606  | -0.18213 | -0.19265 | -0.64426 | 0.526779 | 0.643258 | -6.29055 |
| CLEC11A   | -0.1519  | 0.366378 | -0.6442  | 0.526814 | 0.643259 | -6.29059 |
| C7orf26   | 0.078253 | 0.035198 | 0.643806 | 0.527065 | 0.643486 | -6.29085 |
| ATP5B     | 0.096286 | -0.14107 | 0.643678 | 0.527146 | 0.643517 | -6.29093 |
| SPAG6     | 0.298969 | 0.101834 | 0.643663 | 0.527156 | 0.643517 | -6.29094 |
| HTR3E     | -0.18704 | -0.21452 | -0.64351 | 0.527251 | 0.643593 | -6.29104 |
| ZMYM4     | -0.11707 | -0.08619 | -0.39829 | 0.695723 | 0.785344 | -6.29108 |
| CARD14    | 0.198938 | 0.119363 | 0.643382 | 0.527334 | 0.643648 | -6.29112 |
| JAGN1     | 0.122152 | -0.10263 | 0.64334  | 0.527361 | 0.643648 | -6.29115 |
| LINC00303 | -0.03989 | 0.007978 | -0.64311 | 0.527508 | 0.643787 | -6.2913  |
| PAXIP1    | 0.086833 | -0.19745 | 0.642735 | 0.527746 | 0.643997 | -6.29154 |
| FAM96B    | -0.1068  | -0.00607 | -0.64273 | 0.527746 | 0.643997 | -6.29154 |
| LOC100121 | 0.176908 | 0.003051 | 0.642541 | 0.527869 | 0.644106 | -6.29166 |
| RARS2     | -0.13368 | -0.291   | -0.64225 | 0.528057 | 0.644281 | -6.29186 |
| XKR8      | -0.09873 | 0.152324 | -0.64221 | 0.528078 | 0.644281 | -6.29188 |
| DGKZ      | -0.15783 | 0.625012 | -0.64204 | 0.528185 | 0.644372 | -6.29199 |
| HOMER1    | 0.034997 | -0.17189 | 0.137654 | 0.892361 | 0.935673 | -6.292   |
| MED16     | -0.11119 | 0.34754  | -0.64165 | 0.528434 | 0.644627 | -6.29224 |
| UBAC1     | -0.07016 | 0.021724 | -0.64161 | 0.528463 | 0.644627 | -6.29227 |
| TATDN2    | 0.151199 | 0.007757 | 0.64156  | 0.528493 | 0.644627 | -6.2923  |
| REM2      | -0.31322 | 1.034917 | -0.64126 | 0.528682 | 0.644818 | -6.29249 |
| EIF2A     | -0.17028 | -0.08567 | -0.62488 | 0.539535 | 0.654712 | -6.2926  |
| BTG2      | -0.11272 | 0.080563 | -0.64107 | 0.528804 | 0.644926 | -6.29261 |
| A2LD1     | -0.3171  | 0.075801 | -0.64063 | 0.529086 | 0.64523  | -6.2929  |
| ERRFI1    | -0.12058 | -0.13258 | -0.64053 | 0.529148 | 0.645265 | -6.29296 |
| DUS1L     | 0.101718 | 0.047639 | 0.640086 | 0.529431 | 0.64557  | -6.29325 |
| FLI1      | -0.16522 | 0.132287 | -0.63962 | 0.529725 | 0.645889 | -6.29355 |
| MAP1B     | 0.142554 | 0.109089 | 0.639491 | 0.52981  | 0.645952 | -6.29363 |
| WDR7      | -0.1047  | -0.28133 | -0.63917 | 0.530013 | 0.646119 | -6.29384 |
| ASNSD1    | -0.18096 | -0.37319 | -0.63892 | 0.530174 | 0.646276 | -6.294   |
| C22orf13  | -0.19278 | 0.357137 | -0.63846 | 0.530466 | 0.646551 | -6.29429 |
| C1orf204  | 0.192028 | 0.155384 | 0.6382   | 0.530632 | 0.646675 | -6.29446 |
| LOC100506 | -0.18698 | 0.148686 | -0.63816 | 0.530658 | 0.646675 | -6.29449 |
| SPTLC3    | 0.091542 | 0.048214 | 0.638146 | 0.530667 | 0.646675 | -6.29449 |

|           |          |          |          |          |          |          |
|-----------|----------|----------|----------|----------|----------|----------|
| DNAH3     | -0.1029  | 0.152582 | -0.63793 | 0.530804 | 0.646762 | -6.29463 |
| GALNT11   | -0.11806 | -0.27447 | -0.63718 | 0.531284 | 0.647204 | -6.29512 |
| HILPDA    | 0.134843 | 0.030179 | 0.637155 | 0.531299 | 0.647204 | -6.29513 |
| GPLD1     | 0.076192 | -0.12994 | 0.431152 | 0.671516 | 0.766095 | -6.29524 |
| C14orf49  | -0.17083 | 0.109683 | -0.63688 | 0.531478 | 0.647377 | -6.29531 |
| FSTL4     | 0.15792  | -0.11184 | 0.636488 | 0.531725 | 0.647568 | -6.29556 |
| PMS2P5    | -0.14427 | -0.12377 | -0.63648 | 0.53173  | 0.647568 | -6.29556 |
| CD3EAP    | -0.1156  | 0.229236 | -0.63596 | 0.532065 | 0.647895 | -6.2959  |
| LY86-AS1  | -0.12607 | -0.10292 | -0.6196  | 0.542935 | 0.657576 | -6.29591 |
| NRCAM     | 0.080737 | -0.1967  | 0.599711 | 0.55623  | 0.668797 | -6.29616 |
| ORF1      | 0.234658 | -0.24104 | 0.618606 | 0.543574 | 0.658147 | -6.29653 |
| LOC100128 | -0.2021  | 0.293431 | -0.63464 | 0.532903 | 0.648795 | -6.29674 |
| LOC151658 | -0.28008 | 0.091585 | -0.63458 | 0.532946 | 0.648807 | -6.29678 |
| RGS9BP    | 0.069514 | 0.01389  | 0.618084 | 0.543911 | 0.658433 | -6.29686 |
| ITGA2B    | 0.304036 | 0.43333  | 0.634081 | 0.533262 | 0.649151 | -6.2971  |
| IRX2      | -0.10212 | -0.34674 | -0.51082 | 0.616096 | 0.720716 | -6.29712 |
| AGPAT4-IT | -0.18103 | 0.194282 | -0.63384 | 0.533418 | 0.649266 | -6.29725 |
| MRPL24    | -0.15152 | 0.195682 | -0.63383 | 0.533423 | 0.649266 | -6.29726 |
| DNAH11    | 0.237142 | -0.19615 | 0.633662 | 0.53353  | 0.649357 | -6.29736 |
| SNX8      | -0.21114 | 0.584431 | -0.6335  | 0.533635 | 0.649444 | -6.29747 |
| COLEC12   | 0.127242 | -0.18074 | 0.633328 | 0.533743 | 0.649535 | -6.29758 |
| WIPF2     | 0.110768 | 0.064215 | 0.632799 | 0.534082 | 0.649907 | -6.29791 |
| HSP90AB3  | 0.264275 | -0.07127 | 0.616286 | 0.545071 | 0.659258 | -6.29798 |
| BTN2A2    | -0.20061 | 0.359511 | -0.63256 | 0.534237 | 0.650037 | -6.29807 |
| LOC200726 | 0.112721 | -0.19025 | 0.632528 | 0.534255 | 0.650037 | -6.29809 |
| LOC284926 | -0.06771 | -0.01476 | -0.63237 | 0.534357 | 0.65008  | -6.29819 |
| PXDNL     | 0.107927 | -0.19014 | 0.59635  | 0.558423 | 0.67082  | -6.29819 |
| C3orf70   | -0.24636 | 0.24895  | -0.63197 | 0.534613 | 0.650351 | -6.29844 |
| CYTIP     | -0.11197 | 0.21549  | -0.63189 | 0.534666 | 0.650375 | -6.29849 |
| BCAT2     | -0.13299 | 0.35112  | -0.63142 | 0.534965 | 0.650668 | -6.29879 |
| MTUS1     | -0.14253 | -0.00738 | -0.52826 | 0.60382  | 0.711259 | -6.29885 |
| MLIP      | 0.140143 | -0.01851 | 0.545408 | 0.591864 | 0.700767 | -6.29892 |
| FNTB      | -0.15629 | 0.474708 | -0.63112 | 0.535154 | 0.650779 | -6.29898 |
| DROSHA    | 0.142575 | 0.077972 | 0.631058 | 0.535197 | 0.650779 | -6.29902 |
| RNASEK    | -0.10484 | 0.165468 | -0.63106 | 0.535197 | 0.650779 | -6.29902 |
| TMEM45B   | 0.336911 | 0.416497 | 0.630825 | 0.535346 | 0.650879 | -6.29917 |
| SSBP4     | -0.13695 | 0.414616 | -0.63071 | 0.535421 | 0.65093  | -6.29924 |
| KLHL21    | -0.13242 | 0.202206 | -0.63013 | 0.535794 | 0.651316 | -6.29961 |
| NUDT6     | -0.14583 | 0.060709 | -0.62996 | 0.535898 | 0.651388 | -6.29972 |
| ACCN5     | -0.16789 | -0.00611 | -0.62939 | 0.536264 | 0.651793 | -6.30008 |
| SPRR2D    | -0.12478 | -0.02459 | -0.62917 | 0.536404 | 0.651923 | -6.30022 |
| HPS3      | -0.12694 | -0.30301 | -0.62909 | 0.536456 | 0.651937 | -6.30027 |
| ZFP42     | -0.14014 | 0.052878 | -0.62905 | 0.536482 | 0.651937 | -6.30029 |
| PHLDB1    | 0.147717 | -0.02478 | 0.62841  | 0.536894 | 0.652397 | -6.3007  |
| MTSS1     | 0.205788 | 0.074527 | 0.61166  | 0.548064 | 0.661743 | -6.30084 |
| PNLDC1    | -0.25527 | 0.610719 | -0.62816 | 0.537054 | 0.652509 | -6.30086 |
| WNK2      | -0.12161 | 0.032352 | -0.62811 | 0.537086 | 0.652509 | -6.30089 |

|           |          |          |          |          |          |          |
|-----------|----------|----------|----------|----------|----------|----------|
| SETD2     | -0.25682 | 0.367516 | -0.62781 | 0.53728  | 0.652704 | -6.30108 |
| RPL13AP3  | 0.181293 | -0.03053 | 0.627715 | 0.537341 | 0.652737 | -6.30114 |
| MRPS6     | 0.120874 | 0.103322 | 0.627465 | 0.537501 | 0.652851 | -6.3013  |
| LYZL2     | 0.130786 | -0.13156 | 0.52365  | 0.606958 | 0.713849 | -6.30131 |
| BZRAP1    | -0.10358 | 0.40112  | -0.62725 | 0.537642 | 0.652982 | -6.30144 |
| GNGT1     | 0.139848 | -0.1702  | 0.62718  | 0.537684 | 0.652992 | -6.30148 |
| TRUB1     | 0.037397 | -0.00831 | 0.590705 | 0.562117 | 0.674161 | -6.30158 |
| FYTTD1    | -0.16753 | -0.23842 | -0.62694 | 0.537838 | 0.653139 | -6.30163 |
| C6orf136  | -0.07535 | 0.207194 | -0.62685 | 0.537893 | 0.653165 | -6.30168 |
| DGKQ      | 0.127617 | -0.23403 | 0.626636 | 0.538034 | 0.653295 | -6.30182 |
| CASKIN1   | -0.10275 | -0.03534 | -0.62637 | 0.538204 | 0.653463 | -6.30199 |
| HIST1H2BC | -0.2237  | 0.213321 | -0.62625 | 0.538281 | 0.653477 | -6.30206 |
| HTR5A     | 0.123543 | -0.15841 | 0.626246 | 0.538283 | 0.653477 | -6.30207 |
| SCN11A    | 0.05763  | -0.01281 | 0.58977  | 0.56273  | 0.674794 | -6.30213 |
| C3orf49   | -0.16851 | 0.062797 | -0.62565 | 0.538665 | 0.6539   | -6.30244 |
| SLC39A6   | 0.197593 | -0.35869 | 0.625184 | 0.538966 | 0.65419  | -6.30274 |
| ALDOA     | 0.097986 | 0.040795 | 0.625178 | 0.538971 | 0.65419  | -6.30274 |
| KLK5      | -0.09789 | -0.10961 | -0.62502 | 0.53907  | 0.654271 | -6.30284 |
| SMCHD1    | -0.17826 | 0.365146 | -0.62475 | 0.539245 | 0.654442 | -6.30301 |
| SMN2      | 0.172799 | -0.16217 | 0.624345 | 0.539506 | 0.654712 | -6.30326 |
| KY        | -0.10518 | -0.03469 | -0.6073  | 0.550891 | 0.663982 | -6.30352 |
| CHCHD2    | -0.16188 | -0.20089 | -0.62383 | 0.539835 | 0.654995 | -6.30358 |
| DHX58     | 0.237319 | 0.0356   | 0.623648 | 0.539954 | 0.655095 | -6.3037  |
| TSPAN33   | -0.2493  | 0.665777 | -0.6236  | 0.539984 | 0.655095 | -6.30373 |
| ZBTB20-AS | 0.075695 | -0.04062 | 0.623466 | 0.540072 | 0.655161 | -6.30382 |
| ZNF221    | -0.1807  | -0.06246 | -0.53638 | 0.597962 | 0.706237 | -6.30386 |
| TNFRSF18  | -0.13872 | 0.22407  | -0.62331 | 0.54017  | 0.65524  | -6.30391 |
| NRSN1     | 0.111599 | 0.06196  | 0.623094 | 0.540311 | 0.655371 | -6.30405 |
| CLIP2     | 0.180137 | 0.393164 | 0.623022 | 0.540358 | 0.655386 | -6.30409 |
| SUN1      | -0.19782 | 0.154083 | -0.62271 | 0.540555 | 0.655571 | -6.30429 |
| NDFIP2    | -0.22672 | 0.185915 | -0.62263 | 0.540613 | 0.655571 | -6.30434 |
| TMPRSS11  | -0.16325 | -0.02826 | -0.62259 | 0.540634 | 0.655571 | -6.30436 |
| SOX14     | -0.2038  | 0.136057 | -0.62258 | 0.540644 | 0.655571 | -6.30437 |
| WIBG      | 0.120297 | -0.23732 | 0.622498 | 0.540695 | 0.655592 | -6.30442 |
| H2AFJ     | 0.113486 | 0.099923 | 0.622301 | 0.540822 | 0.655706 | -6.30455 |
| LRP2BP    | -0.11496 | -0.05525 | -0.62159 | 0.541278 | 0.656218 | -6.30499 |
| ZFP82     | -0.2845  | 0.293672 | -0.62125 | 0.541499 | 0.656435 | -6.3052  |
| SAMHD1    | 0.121849 | -0.00975 | 0.584562 | 0.566152 | 0.677992 | -6.30523 |
| PPFIA4    | 0.138613 | -0.01111 | 0.407561 | 0.688438 | 0.779321 | -6.3053  |
| SRP9      | 0.272596 | 0.163558 | 0.621036 | 0.541637 | 0.656492 | -6.30534 |
| GGN       | 0.101786 | -0.05103 | 0.620553 | 0.541949 | 0.656788 | -6.30564 |
| RBFA      | 0.214996 | 0.050797 | 0.620465 | 0.542005 | 0.656816 | -6.3057  |
| AMBRA1    | 0.126827 | 0.06408  | 0.620405 | 0.542044 | 0.656822 | -6.30573 |
| ADAMTS14  | 0.058352 | 0.043763 | 0.620293 | 0.542116 | 0.656869 | -6.3058  |
| YOD1      | -0.21617 | -0.7471  | -0.61972 | 0.542484 | 0.657259 | -6.30616 |
| NKD1      | -0.16917 | 0.195115 | -0.61969 | 0.542505 | 0.657259 | -6.30618 |
| TEX19     | 0.259586 | -0.10269 | 0.619589 | 0.54257  | 0.657297 | -6.30624 |

|          |          |          |          |          |          |          |
|----------|----------|----------|----------|----------|----------|----------|
| POU5F1P3 | 0.111682 | -0.32635 | 0.619532 | 0.542607 | 0.657301 | -6.30628 |
| RRAS     | -0.17122 | 0.512145 | -0.61911 | 0.54288  | 0.657576 | -6.30654 |
| PPP4R4   | 0.155914 | 0.068209 | 0.619038 | 0.542926 | 0.657576 | -6.30659 |
| RSPO2    | 0.136166 | 0.0817   | 0.618674 | 0.543161 | 0.657809 | -6.30681 |
| DSEL     | 0.245949 | 0.14757  | 0.618472 | 0.543292 | 0.657927 | -6.30694 |
| TRIL     | -0.14277 | -0.08033 | -0.61838 | 0.543352 | 0.657959 | -6.307   |
| RRP7B    | 0.125919 | 0.142995 | 0.618257 | 0.54343  | 0.658013 | -6.30707 |
| DHCR24   | -0.19016 | 0.524413 | -0.61787 | 0.543682 | 0.658237 | -6.30732 |
| PABPC4   | -0.18699 | 0.408486 | -0.61775 | 0.543759 | 0.658289 | -6.30739 |
| ZGPAT    | 0.09607  | -0.02592 | 0.617248 | 0.544082 | 0.65857  | -6.3077  |
| ARHGAP31 | -0.04554 | 0.002527 | -0.61723 | 0.544092 | 0.65857  | -6.30771 |
| ILDR1    | 0.119812 | -0.60307 | 0.617149 | 0.544146 | 0.658595 | -6.30776 |
| CRYBA1   | -0.14077 | -0.45564 | -0.58019 | 0.569034 | 0.680562 | -6.30781 |
| GPR116   | -0.24798 | -0.24096 | -0.61695 | 0.544274 | 0.658709 | -6.30789 |
| TNFSF12  | 0.117756 | 0.032759 | 0.616569 | 0.544521 | 0.65891  | -6.30812 |
| TNRC6B   | -0.10464 | 0.150507 | -0.61654 | 0.544538 | 0.65891  | -6.30814 |
| MYOM2    | 0.460299 | 0.466426 | 0.616538 | 0.544541 | 0.65891  | -6.30814 |
| NCKAP5   | -0.13258 | 0.010751 | -0.59925 | 0.556138 | 0.668768 | -6.30843 |
| ACYP2    | 0.147134 | -0.01229 | 0.61606  | 0.54485  | 0.659225 | -6.30844 |
| FZD5     | -0.18758 | 0.08572  | -0.61603 | 0.544868 | 0.659225 | -6.30846 |
| GORASP1  | 0.164694 | 0.149372 | 0.599057 | 0.556261 | 0.668797 | -6.30854 |
| PYCR2    | 0.110759 | 0.226426 | 0.615832 | 0.544997 | 0.659258 | -6.30858 |
| CEP170   | 0.166933 | 0.057896 | 0.527593 | 0.603932 | 0.711273 | -6.30859 |
| STK32A   | 0.126388 | -0.08691 | 0.61577  | 0.545037 | 0.659258 | -6.30862 |
| STAT6    | -0.11776 | 0.190037 | -0.61577 | 0.545037 | 0.659258 | -6.30862 |
| LOC44029 | -0.10809 | -0.19379 | -0.61576 | 0.545044 | 0.659258 | -6.30862 |
| SIRT4    | 0.203396 | 0.326535 | 0.615385 | 0.545287 | 0.659405 | -6.30886 |
| NF1      | -0.1613  | -0.11008 | -0.61527 | 0.545364 | 0.659458 | -6.30893 |
| ZNF212   | 0.109822 | -0.17693 | 0.615181 | 0.545419 | 0.659484 | -6.30898 |
| SCN1B    | -0.26578 | 0.722299 | -0.61493 | 0.54558  | 0.659608 | -6.30914 |
| TMEM111  | -0.10273 | 0.106754 | -0.61492 | 0.545589 | 0.659608 | -6.30915 |
| ZC3H10   | -0.08052 | 0.094597 | -0.61476 | 0.545693 | 0.659668 | -6.30925 |
| PLEKHA7  | -0.25847 | 0.142942 | -0.61465 | 0.54576  | 0.659668 | -6.30931 |
| PCK1     | -0.12604 | -0.04109 | -0.61464 | 0.545772 | 0.659668 | -6.30932 |
| PCDHA9   | 0.179357 | -0.41137 | 0.614592 | 0.5458   | 0.659668 | -6.30935 |
| CYB5RL   | 0.143771 | 0.06318  | 0.614581 | 0.545807 | 0.659668 | -6.30936 |
| SCAF1    | -0.12657 | 0.550488 | -0.61435 | 0.545958 | 0.659811 | -6.3095  |
| FASTK    | -0.09827 | 0.118823 | -0.61423 | 0.546034 | 0.659861 | -6.30957 |
| CUEDC1   | 0.207072 | 0.152569 | 0.613711 | 0.54637  | 0.660227 | -6.30989 |
| FAM131A  | -0.12877 | 0.192833 | -0.61366 | 0.546404 | 0.660227 | -6.30993 |
| EVPLL    | -0.1492  | -0.03653 | -0.61355 | 0.546472 | 0.660239 | -6.30999 |
| OPN3     | -0.18903 | 0.246376 | -0.61354 | 0.546481 | 0.660239 | -6.31    |
| CREB3L3  | -0.36736 | 1.229631 | -0.6128  | 0.546961 | 0.660777 | -6.31046 |
| ADCY1    | -0.1627  | -0.37267 | -0.61235 | 0.547255 | 0.661054 | -6.31074 |
| C15orf41 | -0.13634 | -0.01319 | -0.61234 | 0.547257 | 0.661054 | -6.31074 |
| IREB2    | 0.090864 | -0.14506 | 0.612218 | 0.547338 | 0.661111 | -6.31082 |
| FAM27L   | -0.12559 | -0.25693 | -0.61209 | 0.547424 | 0.661174 | -6.3109  |

|           |          |          |          |          |          |          |
|-----------|----------|----------|----------|----------|----------|----------|
| AKAP7     | -0.15522 | -0.44097 | -0.61189 | 0.547548 | 0.661283 | -6.31102 |
| GPR21     | -0.12286 | -0.09213 | -0.61175 | 0.547638 | 0.661351 | -6.3111  |
| CASK      | -0.19852 | 0.200635 | -0.61035 | 0.548548 | 0.662164 | -6.31197 |
| PEF1      | -0.08883 | 0.112066 | -0.61024 | 0.548622 | 0.662213 | -6.31204 |
| VIPR1     | 0.311877 | -0.15076 | 0.609967 | 0.548798 | 0.662385 | -6.3122  |
| NPTX2     | -0.13775 | -0.1067  | -0.36877 | 0.716885 | 0.802987 | -6.31235 |
| RC3H1     | -0.20046 | 0.384164 | -0.60963 | 0.54902  | 0.662496 | -6.31241 |
| NAT9      | 0.093542 | -0.00312 | 0.609617 | 0.549025 | 0.662496 | -6.31242 |
| SNTB2     | -0.13455 | 0.274785 | -0.60904 | 0.549404 | 0.662863 | -6.31278 |
| TRMT61A   | 0.15878  | 0.193831 | 0.609008 | 0.549421 | 0.662863 | -6.31279 |
| FAM86EP   | 0.166974 | 0.119083 | 0.608992 | 0.549431 | 0.662863 | -6.3128  |
| ARHGAP29  | 0.080257 | -0.01783 | 0.57111  | 0.57504  | 0.68557  | -6.3131  |
| RAI1      | -0.15223 | 0.321704 | -0.60828 | 0.549896 | 0.663383 | -6.31324 |
| FAM162A   | -0.16873 | 0.144311 | -0.60797 | 0.550097 | 0.663584 | -6.31343 |
| SNHG12    | 0.127308 | -0.1801  | 0.607847 | 0.550175 | 0.663607 | -6.3135  |
| ULK1      | -0.1305  | 0.080888 | -0.60783 | 0.550184 | 0.663607 | -6.31351 |
| SYT16     | -0.14826 | -0.00257 | -0.60767 | 0.550294 | 0.663695 | -6.31362 |
| NAALADL1  | 0.089917 | 0.048418 | 0.607618 | 0.550324 | 0.663695 | -6.31364 |
| SF3B2     | 0.09626  | 0.127158 | 0.60733  | 0.550511 | 0.663819 | -6.31382 |
| CNOT6     | -0.17991 | 0.005374 | -0.60728 | 0.550541 | 0.663819 | -6.31385 |
| MAN2B1    | -0.12251 | 0.236591 | -0.6072  | 0.550597 | 0.663819 | -6.3139  |
| GPI       | 0.136069 | -0.00415 | 0.607188 | 0.550604 | 0.663819 | -6.31391 |
| C16orf74  | -0.23439 | 0.051697 | -0.60715 | 0.55063  | 0.663819 | -6.31393 |
| MAST4     | 0.177167 | -0.10496 | 0.606975 | 0.550743 | 0.663914 | -6.31404 |
| SMYD5     | 0.164686 | 0.11172  | 0.606731 | 0.550901 | 0.663982 | -6.31419 |
| COX6B1    | 0.120035 | -0.01282 | 0.606616 | 0.550976 | 0.664032 | -6.31426 |
| LOC727845 | 0.194361 | -0.03044 | 0.606438 | 0.551092 | 0.664099 | -6.31437 |
| FAM114A1  | 0.109584 | -0.0753  | 0.606378 | 0.551131 | 0.664099 | -6.3144  |
| STARD5    | -0.12023 | 0.289944 | -0.60637 | 0.551134 | 0.664099 | -6.31441 |
| CYTB      | -0.20073 | 0.588544 | -0.60621 | 0.551238 | 0.664184 | -6.3145  |
| ARMCX2    | -0.18164 | 0.419154 | -0.51634 | 0.611619 | 0.717523 | -6.31454 |
| CCDC153   | 0.125745 | -0.01573 | 0.605296 | 0.551836 | 0.664824 | -6.31506 |
| C6orf62   | -0.16975 | -0.14075 | -0.60529 | 0.551837 | 0.664824 | -6.31506 |
| KLK3      | -0.11829 | -0.08085 | -0.60511 | 0.551958 | 0.664929 | -6.31518 |
| EDN1      | -0.11277 | 0.31026  | -0.60494 | 0.552066 | 0.665018 | -6.31528 |
| AARS      | 0.138248 | 0.189534 | 0.604885 | 0.552103 | 0.665022 | -6.31531 |
| NUDT14    | 0.197755 | 0.119721 | 0.604795 | 0.552162 | 0.665052 | -6.31537 |
| SNORD114  | 0.172499 | 0.171222 | 0.604717 | 0.552213 | 0.665072 | -6.31542 |
| NAGPA     | -0.1394  | 0.414039 | -0.60434 | 0.552461 | 0.66533  | -6.31565 |
| GPR87     | 0.172811 | -0.13126 | 0.603367 | 0.553092 | 0.666049 | -6.31624 |
| NFU1      | -0.25072 | 0.0766   | -0.60295 | 0.553367 | 0.66634  | -6.3165  |
| H1FO      | 0.215978 | 0.081162 | 0.602595 | 0.553596 | 0.666533 | -6.31671 |
| PQLC3     | 0.123756 | -0.26157 | 0.602433 | 0.553701 | 0.666619 | -6.31681 |
| CFHR5     | 0.044341 | -0.02325 | 0.602363 | 0.553747 | 0.666633 | -6.31685 |
| CDK13     | -0.14116 | 0.282238 | -0.6021  | 0.55392  | 0.666771 | -6.31701 |
| UNG       | -0.16547 | 0.206779 | -0.60208 | 0.55393  | 0.666771 | -6.31702 |
| NUP153    | 0.141907 | -0.48662 | 0.601914 | 0.55404  | 0.666863 | -6.31712 |



|           |          |          |          |          |          |          |
|-----------|----------|----------|----------|----------|----------|----------|
| RNMTL1    | 0.132926 | 0.044775 | 0.601513 | 0.554301 | 0.667136 | -6.31736 |
| PCDHGB8P  | 0.036835 | -0.00737 | 0.601423 | 0.55436  | 0.667166 | -6.31742 |
| FER       | 0.136292 | 0.033689 | 0.470057 | 0.644335 | 0.744142 | -6.31747 |
| NUP210P1  | 0.086971 | -0.07799 | 0.601289 | 0.554447 | 0.66723  | -6.3175  |
| ZNF436    | -0.10199 | -0.18919 | -0.60112 | 0.55456  | 0.667325 | -6.31761 |
| ITGA4     | 0.20555  | -0.04062 | 0.510169 | 0.615851 | 0.720632 | -6.31774 |
| FNDC4     | 0.195137 | -0.40175 | 0.491538 | 0.629031 | 0.731121 | -6.31785 |
| ST8SIA2   | -0.10566 | -0.21337 | -0.60062 | 0.554882 | 0.66763  | -6.3179  |
| NME5      | 0.105678 | -0.25984 | 0.468905 | 0.645141 | 0.744678 | -6.31802 |
| BCL9      | -0.23102 | 0.3825   | -0.59995 | 0.55532  | 0.668075 | -6.31831 |
| TM9SF3    | 0.187611 | -0.89529 | 0.599634 | 0.555529 | 0.668285 | -6.3185  |
| XPR1      | -0.22034 | 0.532529 | -0.59957 | 0.55557  | 0.668294 | -6.31854 |
| LINC00482 | -0.22807 | 0.30429  | -0.59908 | 0.555891 | 0.668598 | -6.31884 |
| CCDC102A  | -0.20534 | 0.506406 | -0.599   | 0.555943 | 0.66862  | -6.31889 |
| GRIA1     | -0.11725 | -0.18035 | -0.59894 | 0.55598  | 0.668622 | -6.31892 |
| TMIGD2    | -0.17066 | 0.178371 | -0.59865 | 0.556169 | 0.668768 | -6.31909 |
| CD96      | 0.23395  | -0.2813  | 0.598267 | 0.556423 | 0.668918 | -6.31933 |
| SLC9A7    | -0.10849 | 0.228841 | -0.59826 | 0.55643  | 0.668918 | -6.31934 |
| HOXD3     | 0.121065 | 0.075617 | 0.598145 | 0.556502 | 0.668963 | -6.3194  |
| ADIPOQ    | 0.086643 | -0.08773 | 0.597828 | 0.55671  | 0.669172 | -6.31959 |
| C12orf68  | 0.187113 | -0.25392 | 0.559177 | 0.582984 | 0.692848 | -6.31993 |
| CMKLR1    | 0.164714 | 0.098592 | 0.597087 | 0.557194 | 0.669713 | -6.32004 |
| TSEN15    | -0.17608 | 0.025306 | -0.59702 | 0.557236 | 0.669722 | -6.32008 |
| LONRF3    | -0.19135 | 0.748109 | -0.59683 | 0.557365 | 0.669805 | -6.3202  |
| SLC6A7    | 0.112084 | -0.03741 | 0.50528  | 0.619214 | 0.723315 | -6.32026 |
| PPP3CC    | 0.171543 | 0.013586 | 0.596712 | 0.55744  | 0.669805 | -6.32027 |
| HTR1A     | -0.10068 | -0.17007 | -0.59671 | 0.557442 | 0.669805 | -6.32027 |
| FLJ40712  | -0.18007 | 0.09462  | -0.57934 | 0.569213 | 0.680735 | -6.32028 |
| MAST4-AS1 | -0.04737 | -0.0137  | -0.57924 | 0.569278 | 0.680771 | -6.32033 |
| CAPN14    | -0.17274 | 0.222571 | -0.59655 | 0.557548 | 0.669892 | -6.32037 |
| PDCL3     | -0.14603 | 0.302218 | -0.5961  | 0.557842 | 0.670203 | -6.32064 |
| ALDH2     | 0.222956 | 0.12385  | 0.595886 | 0.557981 | 0.670329 | -6.32076 |
| LOC100131 | 0.063652 | -0.10088 | 0.462335 | 0.64975  | 0.74841  | -6.32113 |
| STOX2     | 0.112607 | -0.25665 | 0.594703 | 0.558755 | 0.671178 | -6.32147 |
| TXLNG2P   | 0.068513 | 0.003365 | 0.57708  | 0.570709 | 0.681976 | -6.3216  |
| CXCL2     | -0.12283 | 0.217708 | -0.59423 | 0.559067 | 0.671484 | -6.32176 |
| MAMLD1    | 0.101905 | -0.16556 | 0.59421  | 0.559079 | 0.671484 | -6.32177 |
| IL13      | 0.048412 | -0.02666 | 0.576073 | 0.571375 | 0.682484 | -6.32218 |
| FAM46A    | 0.101442 | 0.178142 | 0.593514 | 0.559535 | 0.67199  | -6.32219 |
| BFSP2     | -0.21818 | 0.582289 | -0.59346 | 0.559569 | 0.67199  | -6.32222 |
| RRP7A     | 0.121077 | 0.107136 | 0.593245 | 0.559711 | 0.67212  | -6.32235 |
| CWF19L2   | -0.15693 | -0.01407 | -0.59309 | 0.559813 | 0.672201 | -6.32244 |
| GNB1L     | 0.127474 | 0.085504 | 0.592704 | 0.560067 | 0.672382 | -6.32267 |
| NLGN3     | -0.19542 | 0.611819 | -0.59261 | 0.56013  | 0.672417 | -6.32273 |
| C17orf88  | 0.134835 | -0.0126  | 0.592343 | 0.560303 | 0.672536 | -6.32289 |
| C17orf90  | 0.132262 | -0.23501 | 0.592299 | 0.560332 | 0.672536 | -6.32291 |
| FAM5B     | -0.32315 | 0.002844 | -0.55356 | 0.586739 | 0.696213 | -6.32309 |

|           |          |          |          |          |          |          |
|-----------|----------|----------|----------|----------|----------|----------|
| FOXI1     | -0.08877 | 0.087047 | -0.59146 | 0.560884 | 0.673157 | -6.32341 |
| PPP3R2    | -0.11624 | -0.06724 | -0.59125 | 0.561018 | 0.673277 | -6.32354 |
| C1orf127  | -0.09257 | 0.139414 | -0.59113 | 0.561099 | 0.673332 | -6.32361 |
| CXorf57   | 0.141032 | 0.102221 | 0.591077 | 0.561135 | 0.673334 | -6.32364 |
| ID4       | 0.143516 | -0.21803 | 0.498473 | 0.623913 | 0.727061 | -6.32372 |
| CXorf68   | 0.174326 | -0.27767 | 0.498324 | 0.624015 | 0.727061 | -6.32379 |
| RADIL     | -0.31014 | 0.383963 | -0.59073 | 0.561361 | 0.673565 | -6.32385 |
| ARHGEF35  | 0.11065  | -0.37736 | 0.360004 | 0.723065 | 0.807907 | -6.32388 |
| METTL8    | -0.129   | 0.030107 | -0.59045 | 0.561547 | 0.673747 | -6.32402 |
| CEACAM8   | 0.633517 | -0.45998 | 0.590078 | 0.561791 | 0.673957 | -6.32424 |
| ADARB1    | 0.149851 | 0.176322 | 0.589947 | 0.561877 | 0.673979 | -6.32432 |
| GSG1L     | -0.07642 | 0.032124 | -0.58994 | 0.561879 | 0.673979 | -6.32432 |
| DHX40     | 0.198264 | 0.024378 | 0.551024 | 0.588443 | 0.69768  | -6.32452 |
| CALCRL    | 0.102453 | -0.01673 | 0.589603 | 0.562104 | 0.674161 | -6.32452 |
| RAB11FIP1 | 0.170959 | 0.532205 | 0.58894  | 0.562539 | 0.674606 | -6.32491 |
| LOC100131 | -0.04742 | 0.028253 | -0.57116 | 0.574632 | 0.685208 | -6.32503 |
| PRKCE     | -0.12014 | -0.0643  | -0.58851 | 0.562825 | 0.674866 | -6.32517 |
| H2BFXP    | 0.120357 | -0.31175 | 0.588382 | 0.562906 | 0.674884 | -6.32525 |
| LOC100128 | -0.22203 | 0.224715 | -0.58838 | 0.562908 | 0.674884 | -6.32525 |
| LOC286381 | 0.03779  | -0.4909  | 0.099462 | 0.922432 | 0.956455 | -6.32543 |
| CHRNA7    | -0.18552 | -0.1848  | -0.58796 | 0.563185 | 0.675174 | -6.3255  |
| NOC4L     | 0.117762 | 0.176947 | 0.587841 | 0.563263 | 0.675226 | -6.32557 |
| PCOLCE    | -0.07994 | 0.209378 | -0.58778 | 0.563303 | 0.675233 | -6.3256  |
| PART1     | -0.09988 | -0.30208 | -0.47514 | 0.640447 | 0.740917 | -6.3259  |
| GSTZ1     | -0.10172 | -0.1542  | -0.58725 | 0.563651 | 0.675541 | -6.32592 |
| HHLA3     | -0.27262 | 1.067424 | -0.58723 | 0.563663 | 0.675541 | -6.32593 |
| HNRNPAB   | 0.272166 | 0.314882 | 0.587135 | 0.563727 | 0.675541 | -6.32599 |
| TOMM5     | -0.21439 | -0.21108 | -0.58713 | 0.563732 | 0.675541 | -6.32599 |
| C6orf99   | -0.06287 | 0.008336 | -0.56911 | 0.575996 | 0.686584 | -6.32622 |
| SLC35D3   | -0.17401 | 0.087086 | -0.58668 | 0.564026 | 0.675823 | -6.32625 |
| INSR      | 0.186212 | 0.239111 | 0.586646 | 0.564049 | 0.675823 | -6.32627 |
| DEPTOR    | 0.087892 | -0.24735 | 0.586613 | 0.564071 | 0.675823 | -6.32629 |
| MAD1L1    | 0.195593 | -0.01337 | 0.586295 | 0.56428  | 0.676032 | -6.32648 |
| ACSM2B    | -0.09899 | -0.1057  | -0.58614 | 0.564382 | 0.676113 | -6.32657 |
| TRPC1     | 0.184964 | -0.29679 | 0.586048 | 0.564443 | 0.676145 | -6.32663 |
| LPL       | 0.136335 | -0.56068 | 0.332592 | 0.744417 | 0.825707 | -6.32706 |
| LDLRAD1   | -0.18722 | -0.1716  | -0.49122 | 0.628936 | 0.731054 | -6.32736 |
| BRS3      | 0.083081 | -0.13578 | 0.519886 | 0.6099   | 0.71602  | -6.32738 |
| RPP30     | -0.1763  | -0.07121 | -0.56651 | 0.577728 | 0.688188 | -6.32771 |
| IFIH1     | -0.31287 | 0.279895 | -0.58415 | 0.565692 | 0.677558 | -6.32775 |
| PPIL2     | -0.24661 | 0.654296 | -0.58372 | 0.565976 | 0.677857 | -6.328   |
| IL31      | -0.1706  | 0.066342 | -0.54458 | 0.592777 | 0.701635 | -6.3281  |
| CEACAM5   | 0.086742 | -0.15686 | 0.489611 | 0.630054 | 0.732093 | -6.32816 |
| ESYT2     | 0.106213 | -0.09097 | 0.583447 | 0.566159 | 0.677992 | -6.32816 |
| OSTM1     | 0.21254  | 0.067986 | 0.583389 | 0.566197 | 0.677997 | -6.3282  |
| PRKRIP1   | 0.184237 | 0.123255 | 0.583325 | 0.566239 | 0.678006 | -6.32824 |
| CCDC38    | -0.19623 | 0.054481 | -0.583   | 0.566451 | 0.678218 | -6.32843 |

|           |          |          |          |          |          |          |
|-----------|----------|----------|----------|----------|----------|----------|
| SCG3      | -0.11386 | -0.11861 | -0.58281 | 0.566579 | 0.678331 | -6.32854 |
| C8orf8    | 0.147382 | -0.21177 | 0.58249  | 0.56679  | 0.6785   | -6.32873 |
| LOC440356 | 0.194187 | 0.14441  | 0.564541 | 0.579037 | 0.689454 | -6.32884 |
| PER1      | 0.175404 | -0.33211 | 0.582297 | 0.566918 | 0.678611 | -6.32884 |
| GSTA4     | -0.13517 | 0.135422 | -0.58188 | 0.56719  | 0.678895 | -6.32908 |
| AMZ1      | 0.1953   | -0.04978 | 0.581574 | 0.567395 | 0.6791   | -6.32927 |
| LOC100287 | -0.2882  | -0.83008 | -0.58127 | 0.567599 | 0.67926  | -6.32945 |
| C8orf58   | -0.12397 | 0.537005 | -0.58086 | 0.567869 | 0.679543 | -6.32969 |
| ZCCHC24   | 0.107034 | 0.065157 | 0.31935  | 0.753383 | 0.832729 | -6.32973 |
| PPAN-P2R1 | -0.14149 | 0.338001 | -0.58076 | 0.567936 | 0.679581 | -6.32975 |
| C10orf67  | 0.144349 | 0.038753 | 0.541576 | 0.594801 | 0.703393 | -6.32975 |
| DNAJC25   | -0.03319 | 0.014735 | -0.31898 | 0.753657 | 0.832938 | -6.32985 |
| ZRSR2     | -0.06919 | 0.160587 | -0.58045 | 0.56814  | 0.679784 | -6.32993 |
| ASB9      | -0.22262 | 0.267208 | -0.58036 | 0.568196 | 0.679798 | -6.32998 |
| ZNF746    | 0.137584 | 0.03777  | 0.580323 | 0.568222 | 0.679798 | -6.33    |
| POLR1B    | 0.164923 | 0.091614 | 0.580187 | 0.568312 | 0.679808 | -6.33008 |
| LONRF2    | -0.16451 | 0.189008 | -0.58015 | 0.568334 | 0.679808 | -6.3301  |
| LOC100508 | -0.16224 | -0.16166 | -0.57936 | 0.568858 | 0.680394 | -6.33056 |
| TNAP      | -0.13398 | -0.47179 | -0.43633 | 0.668868 | 0.763653 | -6.33091 |
| SRGAP2    | -0.23866 | 0.508253 | -0.57849 | 0.569435 | 0.680917 | -6.33107 |
| PDP2      | -0.25361 | 0.149478 | -0.57801 | 0.56975  | 0.681232 | -6.33135 |
| PJA1      | -0.21825 | 0.459175 | -0.48313 | 0.634566 | 0.736068 | -6.33136 |
| ZMAT3     | 0.188689 | 0.041714 | 0.577961 | 0.569784 | 0.681232 | -6.33138 |
| ELOVL3    | 0.181189 | 0.095899 | 0.577934 | 0.569802 | 0.681232 | -6.3314  |
| GNA14     | -0.13224 | -0.1866  | -0.55966 | 0.582298 | 0.692285 | -6.33161 |
| EHHADH    | 0.096677 | 0.050953 | 0.577479 | 0.570104 | 0.681551 | -6.33166 |
| GOLGA2P5  | -0.1053  | 0.191647 | -0.57734 | 0.570197 | 0.681621 | -6.33174 |
| HS6ST3    | 0.14431  | -0.22927 | 0.482314 | 0.635132 | 0.736464 | -6.33175 |
| FRMD8     | 0.035103 | -0.00702 | 0.577096 | 0.570358 | 0.681729 | -6.33188 |
| FAM179A   | 0.035103 | -0.00702 | 0.577096 | 0.570358 | 0.681729 | -6.33188 |
| RIPPLY2   | 0.109748 | 0.0282   | 0.559106 | 0.582667 | 0.692614 | -6.33193 |
| LOC100507 | 0.314026 | 0.389196 | 0.559085 | 0.582681 | 0.692614 | -6.33194 |
| BHLHE41   | -0.13283 | 0.397206 | -0.48179 | 0.635498 | 0.736758 | -6.33201 |
| HIST1H2AE | -0.1756  | 0.538598 | -0.57683 | 0.570536 | 0.681875 | -6.33204 |
| SLC12A1   | -0.16882 | -0.17277 | -0.57681 | 0.570549 | 0.681875 | -6.33205 |
| NLRP5     | -0.15585 | 0.072172 | -0.57652 | 0.57074  | 0.681976 | -6.33222 |
| EIF2B3    | -0.13619 | 0.100327 | -0.57649 | 0.57076  | 0.681976 | -6.33224 |
| EIF4G2    | -0.15038 | -0.00816 | -0.57647 | 0.570773 | 0.681976 | -6.33225 |
| PLEKHH3   | 0.109815 | -0.04699 | 0.576417 | 0.570807 | 0.681976 | -6.33228 |
| LOC100509 | -0.15623 | 0.20763  | -0.57633 | 0.570862 | 0.681999 | -6.33233 |
| ARNT      | -0.1381  | 0.42583  | -0.57622 | 0.570937 | 0.682048 | -6.33239 |
| TMEM177   | 0.202809 | 0.01137  | 0.575838 | 0.571192 | 0.68231  | -6.33262 |
| TSC22D1   | -0.20521 | 0.366048 | -0.57551 | 0.571407 | 0.682484 | -6.33281 |
| LOC100193 | 0.078035 | -0.07659 | 0.557463 | 0.583766 | 0.693399 | -6.33285 |
| FAM75C2   | -0.15353 | -0.14652 | -0.50941 | 0.617067 | 0.721623 | -6.33287 |
| SLC44A3   | 0.156692 | -0.06949 | 0.557161 | 0.583968 | 0.693555 | -6.33303 |
| HEATR6    | -0.08299 | 0.04994  | -0.57506 | 0.571706 | 0.6828   | -6.33307 |

|          |          |          |          |          |          |          |
|----------|----------|----------|----------|----------|----------|----------|
| GAP43    | 0.169617 | -0.22351 | 0.574938 | 0.571788 | 0.682856 | -6.33314 |
| DDX43    | -0.1813  | 0.087365 | -0.43122 | 0.672495 | 0.766721 | -6.33319 |
| LOC72991 | -0.2252  | -0.03529 | -0.57432 | 0.572201 | 0.683308 | -6.3335  |
| MYO1D    | -0.11772 | 0.096202 | -0.57386 | 0.572506 | 0.683613 | -6.33377 |
| SLPI     | -0.26236 | -0.20828 | -0.57382 | 0.572527 | 0.683613 | -6.33379 |
| ERI3     | -0.13027 | 0.359639 | -0.57375 | 0.572578 | 0.683632 | -6.33383 |
| LOC10050 | 0.10364  | -0.02629 | 0.573663 | 0.572634 | 0.683658 | -6.33388 |
| DTHD1    | 0.060614 | 0.023993 | 0.572962 | 0.573099 | 0.684172 | -6.33429 |
| LOC10050 | -0.08842 | -0.05305 | -0.5728  | 0.573206 | 0.684257 | -6.33438 |
| FIGN     | 0.13914  | 0.047527 | 0.533042 | 0.600573 | 0.708424 | -6.3344  |
| USP14    | -0.13404 | -0.20419 | -0.57234 | 0.573516 | 0.684543 | -6.33465 |
| PAM      | -0.1632  | 0.026148 | -0.57191 | 0.573797 | 0.684837 | -6.33489 |
| TDGF1    | 0.133145 | -0.59343 | 0.30883  | 0.762043 | 0.839979 | -6.33494 |
| LHX4     | -0.19584 | 0.149274 | -0.57175 | 0.573905 | 0.684925 | -6.33499 |
| ANKRD19P | 0.259533 | -0.12351 | 0.571578 | 0.574019 | 0.684977 | -6.33509 |
| RRS1     | 0.139493 | 0.163962 | 0.571503 | 0.574069 | 0.684995 | -6.33513 |
| FLJ33360 | -0.09133 | -0.04604 | -0.57145 | 0.574106 | 0.684997 | -6.33516 |
| ENDOU    | -0.10247 | -0.02969 | -0.57132 | 0.574187 | 0.685015 | -6.33523 |
| KIFC3    | -0.14124 | 0.155112 | -0.57132 | 0.57419  | 0.685015 | -6.33523 |
| NEURL4   | 0.075566 | -0.01201 | 0.571173 | 0.574288 | 0.685087 | -6.33532 |
| TECRL    | 0.080056 | 0.024502 | 0.570972 | 0.574422 | 0.685087 | -6.33544 |
| CUL5     | -0.16407 | 0.028577 | -0.57096 | 0.574431 | 0.685087 | -6.33544 |
| JDP2     | 0.158835 | -0.15057 | 0.570934 | 0.574447 | 0.685087 | -6.33546 |
| ZNF454   | 0.058312 | -0.02245 | 0.570914 | 0.574461 | 0.685087 | -6.33547 |
| THAP7    | 0.132337 | 0.104043 | 0.570786 | 0.574545 | 0.685147 | -6.33554 |
| CDH20    | -0.12478 | 0.055248 | -0.57051 | 0.574729 | 0.685282 | -6.3357  |
| C9orf57  | -0.16359 | -0.4278  | -0.56997 | 0.57509  | 0.685587 | -6.33601 |
| GCNT1    | -0.19123 | 0.350543 | -0.56934 | 0.575505 | 0.68604  | -6.33637 |
| CHD6     | 0.138144 | -0.27175 | 0.568547 | 0.576035 | 0.686589 | -6.33683 |
| DNAJC19  | -0.21488 | 0.137432 | -0.56847 | 0.576088 | 0.686589 | -6.33688 |
| WWC3     | 0.119558 | 0.189351 | 0.568441 | 0.576106 | 0.686589 | -6.33689 |
| PRSS1    | 0.092598 | -0.06472 | 0.471492 | 0.642696 | 0.742818 | -6.33699 |
| NPC1     | 0.10646  | -0.15189 | 0.568063 | 0.576357 | 0.686847 | -6.33711 |
| MFSD6    | 0.127273 | -0.06233 | 0.56801  | 0.576393 | 0.686848 | -6.33714 |
| ZNF354A  | -0.26405 | 0.058678 | -0.52784 | 0.604104 | 0.711347 | -6.33721 |
| PNPLA1   | -0.26187 | 0.182563 | -0.47099 | 0.643051 | 0.743009 | -6.33723 |
| GPR125   | 0.053761 | -0.02228 | 0.567401 | 0.576798 | 0.687289 | -6.33749 |
| B4GALNT1 | -0.11108 | -0.26075 | -0.56693 | 0.577109 | 0.687618 | -6.33776 |
| MEOX1    | -0.14564 | 0.050308 | -0.5667  | 0.577269 | 0.687766 | -6.33789 |
| OR8G1    | -0.29961 | 0.190874 | -0.52653 | 0.605    | 0.712145 | -6.33791 |
| HLA-C    | 0.180914 | 0.145693 | 0.566345 | 0.577502 | 0.688003 | -6.33809 |
| MB       | 0.171999 | 0.087608 | 0.566006 | 0.577728 | 0.688188 | -6.33829 |
| GAPDHS   | -0.04813 | -0.01614 | -0.5654  | 0.578132 | 0.688627 | -6.33863 |
| FAM5C    | 0.067885 | -0.04211 | 0.54682  | 0.590912 | 0.699852 | -6.3388  |
| HTR7     | -0.11292 | -0.01629 | -0.52482 | 0.606157 | 0.713036 | -6.33882 |
| PON1     | -0.10381 | 0.094035 | -0.56488 | 0.57848  | 0.688969 | -6.33893 |
| TAS2R9   | -0.10397 | -0.1684  | -0.56487 | 0.578489 | 0.688969 | -6.33894 |

|           |          |          |          |          |          |          |
|-----------|----------|----------|----------|----------|----------|----------|
| ACYP1     | 0.148779 | -0.06749 | 0.564751 | 0.578566 | 0.688978 | -6.339   |
| TMEM132   | 0.0925   | 0.19996  | 0.564583 | 0.578678 | 0.689068 | -6.3391  |
| FBLN5     | 0.239703 | -0.3987  | 0.563945 | 0.579103 | 0.689491 | -6.33946 |
| DKC1      | -0.11735 | 0.150323 | -0.56382 | 0.579184 | 0.689546 | -6.33953 |
| NAGA      | -0.15018 | 0.260184 | -0.56316 | 0.57963  | 0.689958 | -6.33991 |
| SRP72     | 0.113714 | -0.01445 | 0.563147 | 0.579636 | 0.689958 | -6.33992 |
| ZNF227    | 0.167627 | 0.128149 | 0.465298 | 0.647045 | 0.746479 | -6.33994 |
| C4orf6    | -0.14135 | 0.13634  | -0.54461 | 0.592402 | 0.701276 | -6.34003 |
| CPXCR1    | 0.085924 | -0.07256 | 0.420301 | 0.679572 | 0.772497 | -6.34006 |
| HSPA8     | 0.275596 | 0.026316 | 0.562764 | 0.579892 | 0.690184 | -6.34014 |
| ZFAND5    | -0.13863 | 0.298735 | -0.56276 | 0.579897 | 0.690184 | -6.34014 |
| TNK2      | -0.1152  | 0.223065 | -0.56253 | 0.580046 | 0.690278 | -6.34027 |
| LOC100507 | -0.0902  | 0.089619 | -0.52193 | 0.608129 | 0.714927 | -6.34036 |
| TMEM141   | -0.12644 | -0.076   | -0.56228 | 0.580213 | 0.690434 | -6.34041 |
| SYT11     | 0.125895 | -0.26373 | 0.561755 | 0.580567 | 0.690813 | -6.34071 |
| STXBP4    | -0.17008 | -0.13924 | -0.56131 | 0.580865 | 0.691084 | -6.34096 |
| MYSM1     | 0.145088 | 0.073397 | 0.561202 | 0.580936 | 0.691127 | -6.34102 |
| HRSP12    | -0.17195 | -0.22811 | -0.54256 | 0.593787 | 0.702449 | -6.34116 |
| ZBTB10    | -0.10206 | -0.22563 | -0.46268 | 0.648886 | 0.747679 | -6.34117 |
| C1QBP     | 0.161161 | -0.17748 | 0.56092  | 0.581124 | 0.691266 | -6.34118 |
| POLR3E    | -0.13132 | 0.370063 | -0.56083 | 0.581183 | 0.691266 | -6.34123 |
| NCAPG2    | -0.12578 | -0.1802  | -0.56082 | 0.581194 | 0.691266 | -6.34124 |
| CEP19     | -0.18021 | 0.25514  | -0.56071 | 0.581267 | 0.691311 | -6.3413  |
| NAT8L     | -0.15841 | 0.0362   | -0.56065 | 0.581306 | 0.691316 | -6.34134 |
| SIPA1L3   | 0.176708 | 0.507291 | 0.559478 | 0.58209  | 0.692163 | -6.342   |
| TOX       | 0.088845 | 0.159239 | 0.279085 | 0.783573 | 0.854949 | -6.34206 |
| GOLGA6L6  | -0.15453 | -0.01822 | -0.55932 | 0.582198 | 0.69225  | -6.34209 |
| CSN2      | 0.105361 | -0.18065 | 0.54081  | 0.594967 | 0.703505 | -6.34212 |
| RPL5      | 0.227853 | -0.28092 | 0.559224 | 0.582259 | 0.692281 | -6.34214 |
| LOC728481 | 0.149804 | -0.07272 | 0.558671 | 0.58263  | 0.692614 | -6.34246 |
| SIN3A     | -0.10917 | 0.263187 | -0.55841 | 0.582807 | 0.692721 | -6.34261 |
| SMO       | 0.072173 | -0.01634 | 0.558258 | 0.582906 | 0.692798 | -6.34269 |
| ANO5      | -0.19753 | -0.0567  | -0.53932 | 0.595973 | 0.704355 | -6.34293 |
| UACA      | 0.104005 | 0.062403 | 0.557795 | 0.583217 | 0.693081 | -6.34295 |
| HOXA13    | -0.17205 | -0.00906 | -0.5577  | 0.583282 | 0.693081 | -6.34301 |
| TXK       | -0.22349 | 0.205538 | -0.55769 | 0.583286 | 0.693081 | -6.34301 |
| VDR       | -0.14198 | 0.400095 | -0.55758 | 0.583361 | 0.69309  | -6.34307 |
| ELMO1     | 0.178459 | 0.262583 | 0.557533 | 0.583392 | 0.69309  | -6.3431  |
| AIP       | 0.099124 | 0.031008 | 0.557522 | 0.583399 | 0.69309  | -6.3431  |
| ATP6V1B1  | 0.093524 | -0.14951 | 0.557148 | 0.58365  | 0.69334  | -6.34332 |
| LOC150568 | 0.033045 | -0.59973 | 0.088371 | 0.930845 | 0.962784 | -6.34364 |
| CCR6      | 0.145659 | 0.084329 | 0.538006 | 0.596864 | 0.705322 | -6.34365 |
| KCNK12    | 0.099173 | 0.142983 | 0.556505 | 0.584081 | 0.693647 | -6.34368 |
| PCDHB18   | -0.20319 | 0.056972 | -0.55625 | 0.584251 | 0.693806 | -6.34382 |
| XRR1      | -0.17799 | 0.336296 | -0.53748 | 0.597218 | 0.705613 | -6.34393 |
| MRGPRD    | -0.12482 | -0.14088 | -0.43601 | 0.668053 | 0.763077 | -6.34404 |
| HOXA1     | -0.12343 | 0.220375 | -0.55547 | 0.584773 | 0.694385 | -6.34426 |

|           |          |          |          |          |          |          |
|-----------|----------|----------|----------|----------|----------|----------|
| ITGB4     | -0.18185 | 0.637553 | -0.55529 | 0.584897 | 0.694458 | -6.34436 |
| ZNF256    | 0.162256 | -0.2478  | 0.555276 | 0.584905 | 0.694458 | -6.34437 |
| AGR3      | -0.14618 | -0.29392 | -0.45512 | 0.654216 | 0.752006 | -6.34469 |
| SGCE      | 0.106086 | -0.29953 | 0.554669 | 0.585313 | 0.694899 | -6.34471 |
| FKBP10    | -0.08069 | 0.046157 | -0.55445 | 0.585458 | 0.69503  | -6.34483 |
| ASAP1-IT1 | -0.2525  | 0.139788 | -0.55394 | 0.585805 | 0.695396 | -6.34512 |
| FUBP3     | 0.099974 | -0.43769 | 0.553887 | 0.585838 | 0.695396 | -6.34515 |
| UHRF1     | -0.32448 | 0.515723 | -0.55366 | 0.585992 | 0.695537 | -6.34528 |
| RRM2B     | -0.17867 | -0.05797 | -0.53471 | 0.599099 | 0.707281 | -6.34544 |
| PITPNC1   | 0.138852 | 0.051717 | 0.553213 | 0.58629  | 0.695831 | -6.34552 |
| BOP1      | 0.143197 | 0.318489 | 0.553183 | 0.58631  | 0.695831 | -6.34554 |
| LOC148705 | 0.0865   | 0.064274 | 0.552981 | 0.586446 | 0.69595  | -6.34565 |
| TMED6     | 0.055581 | -0.01264 | 0.432128 | 0.670819 | 0.765434 | -6.34576 |
| EXOSC6    | -0.09682 | 0.100393 | -0.55256 | 0.586726 | 0.696213 | -6.34589 |
| CCL1      | 0.146466 | 0.069983 | 0.431627 | 0.671177 | 0.765797 | -6.34598 |
| CCK       | 0.161065 | 0.008404 | 0.551656 | 0.587337 | 0.696846 | -6.34639 |
| CD8B      | 0.252217 | 0.132555 | 0.551646 | 0.587344 | 0.696846 | -6.3464  |
| BAD       | 0.07521  | -0.01435 | 0.551497 | 0.587444 | 0.696922 | -6.34648 |
| FLJ38576  | -0.08702 | 0.029485 | -0.55136 | 0.587534 | 0.696987 | -6.34656 |
| ELF1      | -0.19275 | -0.20267 | -0.55126 | 0.587604 | 0.697025 | -6.34662 |
| RPL10A    | 0.202399 | 0.170823 | 0.55121  | 0.587637 | 0.697025 | -6.34664 |
| TACC2     | 0.146844 | 0.161105 | 0.532247 | 0.600768 | 0.708569 | -6.34677 |
| STEAP3    | -0.16866 | -0.01727 | -0.55095 | 0.58781  | 0.697188 | -6.34679 |
| GNG11     | 0.172489 | -0.03225 | 0.550865 | 0.587868 | 0.697188 | -6.34684 |
| SULT1C4   | -0.14874 | 0.010043 | -0.55085 | 0.587881 | 0.697188 | -6.34685 |
| ST18      | 0.194698 | 0.116819 | 0.550381 | 0.588194 | 0.697517 | -6.3471  |
| N6AMT1    | -0.08824 | -0.22755 | -0.55027 | 0.588272 | 0.697567 | -6.34717 |
| PRTFDC1   | -0.20418 | 0.544956 | -0.55002 | 0.58844  | 0.69768  | -6.34731 |
| TBC1D10C  | 0.105761 | 0.094093 | 0.549966 | 0.588474 | 0.69768  | -6.34734 |
| RABGGTA   | -0.08967 | 0.36157  | -0.54972 | 0.588641 | 0.697836 | -6.34747 |
| PHRF1     | 0.094453 | 0.186418 | 0.54946  | 0.588814 | 0.697999 | -6.34762 |
| MPRIIP    | 0.145529 | 0.221631 | 0.549299 | 0.588923 | 0.698085 | -6.34771 |
| PRC1      | 0.124895 | -0.02164 | 0.549121 | 0.589042 | 0.698185 | -6.34781 |
| LOC728407 | 0.133811 | -0.38577 | 0.479678 | 0.637618 | 0.738735 | -6.34785 |
| MKX       | -0.06761 | 0.013522 | -0.54876 | 0.589288 | 0.698434 | -6.34801 |
| COL5A2    | -0.13995 | -0.05713 | -0.54847 | 0.589483 | 0.698623 | -6.34817 |
| TUBB1     | 0.29553  | 0.679121 | 0.548411 | 0.589521 | 0.698625 | -6.3482  |
| ARMC1     | 0.147107 | -0.46646 | 0.548028 | 0.589778 | 0.698846 | -6.34841 |
| HIST1H4C  | 0.261067 | -1.15535 | 0.547888 | 0.589873 | 0.698915 | -6.34849 |
| TMEM59L   | 0.106068 | -0.10551 | 0.547567 | 0.590089 | 0.699051 | -6.34867 |
| NUDCD3    | -0.09562 | 0.218751 | -0.54756 | 0.590094 | 0.699051 | -6.34867 |
| NR4A1     | 0.2279   | 0.300735 | 0.547226 | 0.590319 | 0.699275 | -6.34886 |
| UCMA      | 0.116416 | -0.09753 | 0.546493 | 0.590813 | 0.699818 | -6.34926 |
| SLC18A1   | 0.140199 | 0.076038 | 0.527429 | 0.604044 | 0.711347 | -6.34936 |
| ZNHIT3    | -0.22729 | -0.44699 | -0.54629 | 0.590949 | 0.699852 | -6.34937 |
| FAM71E1   | 0.114117 | 0.123659 | 0.546123 | 0.591063 | 0.699945 | -6.34947 |
| TAS2R7    | 0.118907 | -0.15059 | 0.545991 | 0.591152 | 0.700007 | -6.34954 |

|          |          |          |          |          |          |          |
|----------|----------|----------|----------|----------|----------|----------|
| CCDC122  | -0.05743 | 0.038607 | -0.5457  | 0.591345 | 0.700194 | -6.3497  |
| NRL      | 0.12769  | 0.080646 | 0.443676 | 0.662323 | 0.758611 | -6.34992 |
| FBLIM1   | -0.11312 | -0.02086 | -0.5447  | 0.59202  | 0.700909 | -6.35025 |
| FAIM2    | 0.072517 | -0.16713 | 0.544149 | 0.592395 | 0.701276 | -6.35055 |
| ANKRD29  | 0.087388 | -0.19035 | 0.524632 | 0.60595  | 0.712878 | -6.35085 |
| TLL1     | 0.228722 | 0.048299 | 0.543592 | 0.592771 | 0.701635 | -6.35086 |
| OR52K2   | 0.146064 | 0.040334 | 0.543326 | 0.592951 | 0.701761 | -6.35101 |
| MMAA     | -0.12426 | 0.151622 | -0.54329 | 0.592975 | 0.701761 | -6.35103 |
| RNASE1   | 0.266481 | 0.134835 | 0.543236 | 0.593011 | 0.701761 | -6.35106 |
| CD14     | -0.16323 | 0.269098 | -0.5431  | 0.593104 | 0.701811 | -6.35113 |
| RRN3P2   | 0.127322 | 0.271284 | 0.542465 | 0.593533 | 0.702275 | -6.35148 |
| KIR2DS4  | -0.25301 | 0.872094 | -0.54226 | 0.593672 | 0.702398 | -6.35159 |
| DCTN4    | -0.12386 | -0.20328 | -0.54211 | 0.593776 | 0.702449 | -6.35168 |
| CACNG7   | 0.114497 | -0.24784 | 0.541836 | 0.593957 | 0.702608 | -6.35183 |
| HLA-J    | -0.23765 | -0.02432 | -0.54169 | 0.594059 | 0.702686 | -6.35191 |
| ANKRD1   | 0.170369 | -0.38778 | 0.438927 | 0.6657   | 0.761289 | -6.35205 |
| C17orf89 | -0.17133 | 0.108179 | -0.5411  | 0.594454 | 0.703111 | -6.35223 |
| RIIAD1   | -0.09293 | -0.00894 | -0.54095 | 0.594557 | 0.703191 | -6.35231 |
| USP36    | 0.202525 | 0.074903 | 0.521766 | 0.607905 | 0.714749 | -6.35237 |
| TSC22D3  | -0.14463 | 0.129204 | -0.54066 | 0.594755 | 0.703382 | -6.35247 |
| COL11A1  | 0.163678 | -0.15581 | 0.540435 | 0.594905 | 0.703475 | -6.35259 |
| DNAJB1   | 0.141262 | 0.128981 | 0.540138 | 0.595106 | 0.703627 | -6.35275 |
| AMELY    | 0.113012 | 0.038888 | 0.520746 | 0.608602 | 0.715311 | -6.35291 |
| DNAJC10  | -0.11642 | -0.07999 | -0.53978 | 0.59535  | 0.703873 | -6.35295 |
| GATA3    | 0.19074  | 0.329065 | 0.436867 | 0.667167 | 0.762332 | -6.35296 |
| INTS4L1  | -0.12282 | -0.11736 | -0.52053 | 0.608748 | 0.715396 | -6.35302 |
| TOMM70A  | 0.268436 | -0.01416 | 0.539392 | 0.595611 | 0.70414  | -6.35316 |
| TPTE2P1  | 0.092356 | -0.20233 | 0.414641 | 0.683341 | 0.775297 | -6.3533  |
| RPL10    | -0.18317 | 0.237467 | -0.53909 | 0.595818 | 0.704341 | -6.35333 |
| ZNF653   | 0.132587 | 0.360729 | 0.539022 | 0.595861 | 0.70435  | -6.35336 |
| ERBB3    | 0.173831 | 0.120252 | 0.538901 | 0.595943 | 0.704355 | -6.35343 |
| TSFM     | 0.106987 | 0.017312 | 0.538858 | 0.595972 | 0.704355 | -6.35345 |
| KCNB1    | -0.12244 | -0.01834 | -0.51933 | 0.609571 | 0.715805 | -6.35366 |
| TIGD7    | -0.10165 | -0.25653 | -0.4349  | 0.668566 | 0.763418 | -6.35383 |
| OR51B5   | 0.096229 | -0.3155  | 0.538057 | 0.596515 | 0.704953 | -6.35389 |
| RAB17    | -0.15337 | -0.02889 | -0.5371  | 0.597167 | 0.705613 | -6.35441 |
| SLC5A11  | 0.138404 | 0.090616 | 0.537072 | 0.597183 | 0.705613 | -6.35443 |
| NCR1     | 0.154848 | -0.001   | 0.350804 | 0.73035  | 0.814067 | -6.35473 |
| UMPS     | -0.14036 | 0.262581 | -0.53646 | 0.597596 | 0.705974 | -6.35476 |
| ENDOV    | 0.092277 | -0.06939 | 0.536334 | 0.597683 | 0.70603  | -6.35483 |
| ZBTB1    | 0.157626 | -0.0308  | 0.536287 | 0.597715 | 0.70603  | -6.35485 |
| RBM46    | 0.139668 | 0.011824 | 0.53623  | 0.597754 | 0.706034 | -6.35488 |
| LPIN2    | 0.130866 | -0.04428 | 0.535823 | 0.59803  | 0.706274 | -6.3551  |
| RLN2     | -0.15089 | 0.082793 | -0.5164  | 0.611573 | 0.71752  | -6.3552  |
| C17orf97 | 0.275304 | 0.297204 | 0.516393 | 0.61158  | 0.71752  | -6.3552  |
| SUN3     | -0.14937 | 0.029494 | -0.53551 | 0.598241 | 0.706481 | -6.35527 |
| PDZD9    | 0.15571  | 0.129557 | 0.535302 | 0.598383 | 0.706606 | -6.35539 |

|           |          |          |          |          |          |          |
|-----------|----------|----------|----------|----------|----------|----------|
| SCAND3    | -0.20496 | 0.295386 | -0.53506 | 0.598546 | 0.706718 | -6.35552 |
| UQCRCQ    | -0.2369  | -0.48614 | -0.53506 | 0.59855  | 0.706718 | -6.35552 |
| COQ9      | -0.06195 | 0.045684 | -0.5346  | 0.598862 | 0.707044 | -6.35577 |
| LOC723806 | 0.103602 | 0.065433 | 0.430159 | 0.671954 | 0.766327 | -6.35592 |
| POLD1     | 0.109208 | 0.210007 | 0.534056 | 0.599229 | 0.707392 | -6.35606 |
| SLC20A2   | 0.141001 | -0.10425 | 0.533596 | 0.599542 | 0.707659 | -6.35631 |
| SPOCK3    | -0.08653 | -0.30849 | -0.53355 | 0.59957  | 0.707659 | -6.35633 |
| SLC25A32  | -0.13393 | -0.11477 | -0.53351 | 0.5996   | 0.707659 | -6.35636 |
| TMEM41A   | -0.11899 | 0.154144 | -0.4908  | 0.629539 | 0.731538 | -6.35638 |
| DNAH14    | 0.170262 | 0.125156 | 0.533355 | 0.599705 | 0.70769  | -6.35644 |
| AQP7P1    | -0.11969 | -0.19468 | -0.53335 | 0.599709 | 0.70769  | -6.35644 |
| NDUFS3    | -0.10189 | -0.19132 | -0.53331 | 0.599735 | 0.70769  | -6.35646 |
| AJUBA     | 0.130628 | -0.03557 | 0.533068 | 0.5999   | 0.707843 | -6.3566  |
| KCNIP1    | -0.13069 | -0.20952 | -0.42855 | 0.673103 | 0.767097 | -6.35662 |
| KIAA1257  | 0.166048 | 0.038639 | 0.532946 | 0.599983 | 0.707857 | -6.35666 |
| HMGN3     | -0.10933 | 0.050253 | -0.53286 | 0.600042 | 0.707882 | -6.35671 |
| SLC16A10  | 0.083874 | 0.027544 | 0.513105 | 0.613834 | 0.718959 | -6.35692 |
| SIDT1     | 0.163693 | 0.028589 | 0.532451 | 0.600319 | 0.708167 | -6.35693 |
| FLJ40434  | 0.189347 | -0.54055 | 0.48913  | 0.630701 | 0.732584 | -6.35722 |
| CLEC4M    | 0.111271 | -0.17361 | 0.53184  | 0.600734 | 0.708569 | -6.35726 |
| ADHFE1    | -0.1472  | 0.158519 | -0.53163 | 0.60088  | 0.708632 | -6.35737 |
| LOC100506 | 0.083488 | 0.030273 | 0.531606 | 0.600894 | 0.708632 | -6.35738 |
| HOXA11-A  | -0.17029 | 0.082015 | -0.53153 | 0.600945 | 0.708643 | -6.35742 |
| EGFLAM    | 0.107213 | -0.12    | 0.531485 | 0.600976 | 0.708643 | -6.35745 |
| C8B       | 0.095338 | -0.37548 | 0.252612 | 0.803452 | 0.869386 | -6.35747 |
| C17orf61  | -0.20754 | -0.38197 | -0.53135 | 0.601071 | 0.708713 | -6.35752 |
| ADRA1A    | -0.11952 | 0.069642 | -0.53116 | 0.601197 | 0.708819 | -6.35762 |
| KBTBD8    | -0.21229 | -0.01013 | -0.53111 | 0.601234 | 0.70882  | -6.35765 |
| VASN      | -0.1404  | 0.123014 | -0.53091 | 0.601366 | 0.708933 | -6.35776 |
| MYO5C     | -0.16795 | 0.118991 | -0.51149 | 0.614941 | 0.719825 | -6.35776 |
| NSMAF     | 0.093816 | -0.07465 | 0.53082  | 0.601428 | 0.708943 | -6.35781 |
| GCET2     | 0.127245 | -0.03728 | 0.530792 | 0.601447 | 0.708943 | -6.35782 |
| PHOSPHO2  | -0.02737 | -0.18317 | -0.08148 | 0.936151 | 0.966444 | -6.35786 |
| INPP5D    | 0.09363  | 0.062461 | 0.530556 | 0.601608 | 0.70906  | -6.35795 |
| TULP3     | 0.194606 | 0.422425 | 0.53054  | 0.601619 | 0.70906  | -6.35796 |
| LOC729121 | 0.158475 | -0.03098 | 0.510959 | 0.615307 | 0.720125 | -6.35803 |
| FAM159A   | 0.169577 | 0.18317  | 0.529975 | 0.602004 | 0.709461 | -6.35826 |
| C20orf85  | -0.10321 | -0.11184 | -0.52993 | 0.602032 | 0.709461 | -6.35828 |
| KLF2      | -0.08354 | 0.467143 | -0.52973 | 0.602173 | 0.709585 | -6.35839 |
| TAGLN2    | -0.17452 | 0.47129  | -0.52925 | 0.602494 | 0.709921 | -6.35865 |
| FAM116A   | 0.088852 | -0.61661 | 0.528797 | 0.602805 | 0.710245 | -6.35889 |
| SART3     | -0.06582 | 0.189761 | -0.5281  | 0.603278 | 0.710759 | -6.35926 |
| LOC728743 | -0.16672 | 0.53055  | -0.52796 | 0.603375 | 0.710831 | -6.35934 |
| SMARCC2   | 0.100868 | 0.393936 | 0.5279   | 0.603416 | 0.710836 | -6.35937 |
| LOC730183 | 0.113914 | -0.06759 | 0.527267 | 0.603848 | 0.711259 | -6.35971 |
| PPIG      | -0.0983  | -0.00254 | -0.5272  | 0.60389  | 0.711266 | -6.35974 |
| NEURL2    | 0.124965 | 0.260051 | 0.526909 | 0.604092 | 0.711347 | -6.3599  |



|           |          |          |          |          |          |          |
|-----------|----------|----------|----------|----------|----------|----------|
| RAB39     | 0.18371  | 0.119282 | 0.526316 | 0.604496 | 0.711766 | -6.36022 |
| ANAPC11   | 0.084206 | -0.15853 | 0.52621  | 0.604568 | 0.711808 | -6.36027 |
| GPS1      | 0.082723 | 0.092897 | 0.525984 | 0.604722 | 0.711935 | -6.36039 |
| SMG1      | -0.21013 | 0.143912 | -0.52592 | 0.604765 | 0.711935 | -6.36043 |
| TET1      | -0.09646 | -0.13217 | -0.52589 | 0.604785 | 0.711935 | -6.36044 |
| MRC1      | -0.10628 | -0.35267 | -0.52549 | 0.60506  | 0.712173 | -6.36066 |
| SMEK3P    | 0.048063 | 0.023055 | 0.505391 | 0.619138 | 0.723274 | -6.36091 |
| BNIP1     | 0.154875 | 0.038284 | 0.524984 | 0.605405 | 0.712536 | -6.36093 |
| NCRNA001  | 0.006058 | 0.377079 | 0.007845 | 0.993861 | 1        | -6.36104 |
| ZNF234    | -0.21615 | 0.131701 | -0.52476 | 0.605556 | 0.712668 | -6.36104 |
| OAZ3      | -0.09953 | 0.246123 | -0.52467 | 0.60562  | 0.712668 | -6.36109 |
| C19orf21  | 0.089569 | -0.1274  | 0.52466  | 0.605626 | 0.712668 | -6.3611  |
| ACSL6     | -0.0441  | -0.01518 | -0.52448 | 0.605749 | 0.71277  | -6.36119 |
| TCF23     | -0.11249 | 0.001205 | -0.52429 | 0.605876 | 0.71285  | -6.36129 |
| PIBF1     | 0.128821 | -0.10087 | 0.524273 | 0.60589  | 0.71285  | -6.3613  |
| ESYT3     | 0.036597 | -0.01822 | 0.524059 | 0.606036 | 0.712936 | -6.36142 |
| LINC00277 | 0.186146 | -0.03839 | 0.417086 | 0.681323 | 0.77368  | -6.36156 |
| MAP3K12   | -0.11685 | 0.526889 | -0.52348 | 0.60643  | 0.713315 | -6.36172 |
| ECT2      | 0.179308 | -0.02771 | 0.330537 | 0.745319 | 0.82652  | -6.36182 |
| ITPR1     | 0.110515 | -0.4721  | 0.522843 | 0.606867 | 0.713785 | -6.36206 |
| CYP2J2    | -0.15653 | 0.232785 | -0.50307 | 0.620736 | 0.724618 | -6.36209 |
| POU5F2    | 0.053746 | -0.30826 | 0.521976 | 0.607459 | 0.714396 | -6.36252 |
| LOC34496  | 0.161005 | 0.235    | 0.521805 | 0.607576 | 0.71449  | -6.36261 |
| ZDHHC24   | 0.106601 | -0.08898 | 0.521458 | 0.607813 | 0.714702 | -6.36279 |
| PTMA      | 0.154886 | 0.067732 | 0.521436 | 0.607828 | 0.714702 | -6.36281 |
| HEYL      | 0.123683 | -0.05214 | 0.521074 | 0.608076 | 0.714907 | -6.363   |
| SDR42E1   | 0.093462 | -0.12388 | 0.192168 | 0.849906 | 0.903976 | -6.36308 |
| C21orf62  | 0.086683 | -0.10264 | 0.520585 | 0.60841  | 0.715214 | -6.36325 |
| CPLX4     | 0.041296 | -0.02138 | 0.50069  | 0.622381 | 0.725845 | -6.36331 |
| IFNG      | 0.175444 | -0.22083 | 0.520449 | 0.608503 | 0.71528  | -6.36333 |
| ZNF502    | -0.15968 | -0.30594 | -0.52039 | 0.608546 | 0.715288 | -6.36336 |
| GGCT      | -0.12345 | -0.11572 | -0.52011 | 0.608738 | 0.715396 | -6.36351 |
| PARP8     | -0.15227 | 0.153551 | -0.51996 | 0.608839 | 0.715461 | -6.36359 |
| KDM1A     | -0.13407 | 0.301406 | -0.5199  | 0.608881 | 0.715467 | -6.36362 |
| ABCG8     | 0.146052 | 0.085031 | 0.519774 | 0.608965 | 0.715496 | -6.36368 |
| SESN1     | 0.167841 | -0.50921 | 0.519745 | 0.608985 | 0.715496 | -6.3637  |
| PRAM1     | -0.1405  | 0.012865 | -0.5197  | 0.609015 | 0.715496 | -6.36372 |
| WDR75     | 0.187242 | 0.144332 | 0.519379 | 0.609235 | 0.715712 | -6.36389 |
| KCNK18    | 0.136713 | 0.042825 | 0.519243 | 0.609329 | 0.715776 | -6.36396 |
| ESR1      | -0.16954 | 0.215258 | -0.51919 | 0.609363 | 0.715776 | -6.36399 |
| RGS18     | 0.226319 | -0.8811  | 0.519123 | 0.609411 | 0.715789 | -6.36402 |
| WDR76     | -0.14023 | 0.181828 | -0.36022 | 0.723154 | 0.80793  | -6.36404 |
| C19orf57  | 0.090775 | 0.148055 | 0.499227 | 0.623391 | 0.726678 | -6.36405 |
| USP26     | -0.13739 | 0.056224 | -0.47518 | 0.640413 | 0.740917 | -6.36406 |
| CLGN      | 0.148029 | -0.34918 | 0.411104 | 0.685629 | 0.777083 | -6.36408 |
| LIN9      | -0.19257 | -0.33632 | -0.51899 | 0.609504 | 0.715805 | -6.3641  |
| ADAM18    | -0.15255 | 0.124585 | -0.51893 | 0.609542 | 0.715805 | -6.36413 |

|           |          |          |          |          |          |          |
|-----------|----------|----------|----------|----------|----------|----------|
| POGK      | -0.09723 | 0.320722 | -0.51881 | 0.609624 | 0.715825 | -6.36419 |
| ANGPTL2   | 0.068811 | 0.020254 | 0.518601 | 0.609768 | 0.715951 | -6.3643  |
| C1orf35   | -0.07617 | 0.12778  | -0.51847 | 0.609858 | 0.716014 | -6.36437 |
| SMN1      | -0.14156 | -0.02129 | -0.51831 | 0.609969 | 0.716059 | -6.36445 |
| ARL4D     | 0.099693 | -0.02446 | 0.51807  | 0.610131 | 0.716206 | -6.36458 |
| CTCFL     | 0.099719 | 0.060939 | 0.386839 | 0.703445 | 0.791552 | -6.36467 |
| HIST1H4B  | -0.15356 | 0.1644   | -0.51771 | 0.610376 | 0.716451 | -6.36477 |
| SHARPIN   | -0.1125  | 0.24602  | -0.51753 | 0.610501 | 0.716554 | -6.36486 |
| UBP1      | -0.06726 | -0.09501 | -0.38555 | 0.704383 | 0.792472 | -6.36518 |
| GFM1      | -0.12352 | -0.06673 | -0.51687 | 0.610957 | 0.717004 | -6.36521 |
| ASNS      | 0.110102 | -0.01399 | 0.516865 | 0.610957 | 0.717004 | -6.36521 |
| RHOB      | 0.13598  | 0.25174  | 0.516661 | 0.611097 | 0.717125 | -6.36532 |
| C15orf48  | -0.13946 | 0.05861  | -0.49661 | 0.625198 | 0.727875 | -6.36537 |
| C9orf163  | 0.074837 | -0.21291 | 0.516423 | 0.61126  | 0.717274 | -6.36544 |
| LOC100507 | -0.19095 | 0.24     | -0.47218 | 0.642514 | 0.742738 | -6.36551 |
| PKDREJ    | -0.14273 | -0.0495  | -0.47194 | 0.642686 | 0.742818 | -6.36563 |
| C7orf30   | -0.1668  | 0.262423 | -0.51598 | 0.611566 | 0.71752  | -6.36567 |
| MRPL34    | -0.10026 | -0.01036 | -0.51572 | 0.611744 | 0.717627 | -6.36581 |
| FMN2      | 0.04709  | 0.024825 | 0.51538  | 0.611976 | 0.71784  | -6.36599 |
| SAE1      | -0.11241 | 0.165478 | -0.51533 | 0.612012 | 0.71784  | -6.36601 |
| CDC23     | 0.106209 | -0.18201 | 0.515273 | 0.612049 | 0.71784  | -6.36604 |
| XPC       | -0.10143 | 0.266125 | -0.51524 | 0.612073 | 0.71784  | -6.36606 |
| GMPS      | 0.078189 | -0.06877 | 0.514929 | 0.612285 | 0.717968 | -6.36622 |
| AIFM2     | -0.11457 | 0.236094 | -0.51492 | 0.61229  | 0.717968 | -6.36623 |
| RNF113A   | 0.072912 | 0.118368 | 0.514919 | 0.612292 | 0.717968 | -6.36623 |
| SLC15A3   | 0.119856 | -0.05943 | 0.51448  | 0.612593 | 0.718278 | -6.36646 |
| DBNDD1    | -0.16164 | 0.353623 | -0.51442 | 0.612632 | 0.71828  | -6.36648 |
| BOC       | 0.11192  | -0.19675 | 0.514234 | 0.612762 | 0.71839  | -6.36658 |
| ACTL7B    | 0.092038 | -0.11308 | 0.494026 | 0.626991 | 0.729356 | -6.36667 |
| AKAP6     | 0.065002 | -0.07112 | 0.513828 | 0.613041 | 0.718674 | -6.3668  |
| AMPD2     | -0.12092 | 0.170091 | -0.51375 | 0.613093 | 0.718692 | -6.36684 |
| C16orf42  | 0.069767 | -0.08589 | 0.513655 | 0.61316  | 0.718728 | -6.36689 |
| DDX18     | -0.1935  | 0.589542 | -0.51357 | 0.613216 | 0.718746 | -6.36693 |
| EPB41L1   | -0.12209 | 0.173971 | -0.51352 | 0.613249 | 0.718746 | -6.36695 |
| LDHAL6B   | -0.12678 | -0.04877 | -0.46904 | 0.644714 | 0.744329 | -6.36702 |
| IL1RL1    | -0.18151 | 0.129469 | -0.51324 | 0.613447 | 0.718893 | -6.3671  |
| LOC285456 | 0.023823 | -0.0049  | 0.35179  | 0.729353 | 0.813186 | -6.36712 |
| NBPF22P   | -0.10162 | 0.049052 | -0.51316 | 0.613497 | 0.718901 | -6.36714 |
| EIF3D     | 0.090146 | 0.076128 | 0.513066 | 0.613564 | 0.718901 | -6.36719 |
| MPO       | -0.39259 | 0.196741 | -0.51305 | 0.613576 | 0.718901 | -6.3672  |
| DPH2      | -0.14911 | 0.320709 | -0.51294 | 0.613653 | 0.718901 | -6.36726 |
| TOB2      | -0.13683 | 0.558229 | -0.51292 | 0.613666 | 0.718901 | -6.36727 |
| SMOX      | -0.24267 | 0.1974   | -0.5129  | 0.613675 | 0.718901 | -6.36728 |
| WARS2     | 0.050393 | 0.078526 | 0.169377 | 0.867515 | 0.916784 | -6.36731 |
| CNR1      | -0.07068 | -0.05443 | -0.51274 | 0.613786 | 0.718959 | -6.36736 |
| TSPYL6    | 0.10453  | 0.022293 | 0.512686 | 0.613825 | 0.718959 | -6.36739 |
| WNK4      | 0.078386 | -0.15735 | 0.512596 | 0.613887 | 0.718971 | -6.36744 |

|           |          |          |          |          |          |          |
|-----------|----------|----------|----------|----------|----------|----------|
| SDF4      | -0.06186 | 0.128527 | -0.51255 | 0.613918 | 0.718971 | -6.36746 |
| ZNF732    | -0.0539  | -0.07761 | -0.34536 | 0.734662 | 0.817849 | -6.3675  |
| FSCN1     | 0.186226 | 0.441547 | 0.512323 | 0.614074 | 0.719111 | -6.36758 |
| FBXO16    | -0.1393  | 0.262762 | -0.40211 | 0.69212  | 0.782132 | -6.3678  |
| P2RY10    | 0.064918 | -0.25024 | 0.208411 | 0.837266 | 0.894758 | -6.3679  |
| PK3       | -0.18356 | 0.400069 | -0.51156 | 0.614596 | 0.71968  | -6.36797 |
| YES1      | 0.120072 | -0.05143 | 0.511501 | 0.614639 | 0.719683 | -6.368   |
| LOC100501 | -0.08004 | 0.011744 | -0.51145 | 0.614673 | 0.719683 | -6.36803 |
| CEP70     | 0.1842   | -0.05213 | 0.511148 | 0.614882 | 0.719825 | -6.36819 |
| IQCG      | -0.10851 | 0.217819 | -0.51109 | 0.61492  | 0.719825 | -6.36822 |
| LRR3      | -0.12292 | 0.069916 | -0.51107 | 0.614938 | 0.719825 | -6.36823 |
| ADAR2     | -0.16237 | -0.28958 | -0.51089 | 0.61506  | 0.719921 | -6.36832 |
| FCRL4     | -0.06801 | -0.46728 | -0.342   | 0.73714  | 0.819909 | -6.36869 |
| TMEM183   | 0.073033 | -0.26809 | 0.510059 | 0.61563  | 0.72042  | -6.36875 |
| ST6GALNA  | -0.1897  | 0.040865 | -0.51006 | 0.615633 | 0.72042  | -6.36875 |
| SLC25A17  | -0.07264 | -0.07752 | -0.50964 | 0.615916 | 0.720665 | -6.36897 |
| BYSL      | 0.124481 | 0.237892 | 0.509445 | 0.616053 | 0.720716 | -6.36907 |
| POLR3D    | -0.12041 | 0.252604 | -0.50943 | 0.616066 | 0.720716 | -6.36908 |
| EPM2A     | 0.102308 | -0.20157 | 0.509367 | 0.616107 | 0.720716 | -6.36911 |
| TMSB4Y    | 0.148944 | 0.054036 | 0.509207 | 0.616217 | 0.720802 | -6.36919 |
| ZIC1      | 0.054896 | 0.034671 | 0.398661 | 0.69462  | 0.78446  | -6.36921 |
| MUC5AC    | -0.0993  | -0.06063 | -0.50897 | 0.616377 | 0.720946 | -6.36931 |
| TMC7      | 0.03002  | -0.00632 | 0.488691 | 0.630693 | 0.732584 | -6.36934 |
| C17orf101 | -0.09529 | 0.335274 | -0.50867 | 0.616588 | 0.72115  | -6.36947 |
| ZIM2      | 0.108808 | -0.47224 | 0.508147 | 0.616946 | 0.721526 | -6.36974 |
| TNFRSF21  | 0.210252 | -0.04296 | 0.507475 | 0.617409 | 0.721981 | -6.37008 |
| EI24      | -0.09903 | 0.057495 | -0.50738 | 0.617475 | 0.722015 | -6.37013 |
| KITLG     | -0.1877  | 0.163108 | -0.5071  | 0.617666 | 0.722195 | -6.37028 |
| MRO       | -0.10089 | -0.01046 | -0.50679 | 0.61788  | 0.722403 | -6.37043 |
| AARS2     | 0.1303   | 0.03527  | 0.506643 | 0.617983 | 0.722479 | -6.37051 |
| ITGB3     | 0.273492 | 0.378422 | 0.50634  | 0.618192 | 0.722681 | -6.37067 |
| MAGEF1    | -0.12744 | 0.116124 | -0.50628 | 0.618234 | 0.722687 | -6.3707  |
| C4orf21   | -0.14965 | -0.00479 | -0.5059  | 0.618496 | 0.72295  | -6.37089 |
| C9orf16   | 0.106564 | 0.092228 | 0.505693 | 0.618638 | 0.723073 | -6.371   |
| ADAM11    | 0.109596 | -0.15069 | 0.505317 | 0.618897 | 0.723274 | -6.37119 |
| PLEKHA4   | 0.178514 | 0.547184 | 0.505317 | 0.618897 | 0.723274 | -6.37119 |
| C2orf19   | 0.089388 | -0.11646 | 0.505251 | 0.618942 | 0.723274 | -6.37123 |
| EN1       | 0.186996 | -0.19296 | 0.505222 | 0.618963 | 0.723274 | -6.37124 |
| C9orf93   | 0.26834  | 0.161004 | 0.505044 | 0.619085 | 0.723274 | -6.37133 |
| PIK3R1OS  | 0.130422 | -0.02284 | 0.504983 | 0.619127 | 0.723274 | -6.37136 |
| GPR124    | 0.123113 | 0.144993 | 0.504971 | 0.619135 | 0.723274 | -6.37137 |
| CDC14A    | 0.26449  | 0.158694 | 0.504961 | 0.619143 | 0.723274 | -6.37137 |
| CCL25     | 0.109093 | 0.017732 | 0.504488 | 0.619468 | 0.723569 | -6.37162 |
| LIMA1     | 0.168793 | -0.06019 | 0.392475 | 0.699106 | 0.788346 | -6.3717  |
| LGMN      | -0.07187 | 0.214369 | -0.39234 | 0.699202 | 0.788346 | -6.37175 |
| MTERF     | -0.17461 | 0.107425 | -0.50422 | 0.619656 | 0.723744 | -6.37175 |
| CXorf65   | -0.11516 | 0.189283 | -0.50397 | 0.619823 | 0.723896 | -6.37188 |

|           |          |          |          |          |          |          |
|-----------|----------|----------|----------|----------|----------|----------|
| ADK       | 0.120182 | 0.188842 | 0.391986 | 0.699462 | 0.788385 | -6.37189 |
| DKFZp779f | 0.132691 | -0.07187 | 0.503905 | 0.619871 | 0.72391  | -6.37191 |
| GPR35     | -0.14679 | 0.316297 | -0.50341 | 0.620214 | 0.72425  | -6.37217 |
| METTL1    | -0.15265 | 0.166301 | -0.50338 | 0.620236 | 0.72425  | -6.37218 |
| CSMD3     | 0.123017 | -0.06263 | 0.367193 | 0.717789 | 0.803713 | -6.37224 |
| FA2H      | -0.17122 | 0.786319 | -0.39105 | 0.700143 | 0.788924 | -6.37227 |
| HIST1H2Ak | 0.206448 | 0.123869 | 0.503086 | 0.620436 | 0.72444  | -6.37233 |
| LOC100507 | -0.07931 | 0.027853 | -0.50282 | 0.620619 | 0.724595 | -6.37247 |
| FAM100B   | -0.07208 | 0.138122 | -0.50276 | 0.62066  | 0.724595 | -6.3725  |
| USP47     | -0.1371  | 0.151639 | -0.50273 | 0.62068  | 0.724595 | -6.37251 |
| CD207     | -0.08999 | -0.2526  | -0.36618 | 0.71853  | 0.80437  | -6.37261 |
| DZIP1     | -0.14391 | 0.285353 | -0.36604 | 0.718633 | 0.804439 | -6.37267 |
| GJB1      | 0.079089 | -0.12047 | 0.481887 | 0.635429 | 0.736722 | -6.37269 |
| LYSMD3    | 0.182162 | 0.109297 | 0.501735 | 0.621369 | 0.725313 | -6.37302 |
| VANGL1    | -0.14515 | 0.642846 | -0.50159 | 0.62147  | 0.725364 | -6.37309 |
| SRGAP3    | -0.14942 | 0.139131 | -0.50157 | 0.621487 | 0.725364 | -6.37311 |
| ZNF649    | 0.177482 | 0.106489 | 0.501411 | 0.621593 | 0.725425 | -6.37318 |
| HMG5      | 0.176455 | 0.105873 | 0.501336 | 0.621645 | 0.725425 | -6.37322 |
| TPBG      | -0.07385 | -0.25816 | -0.5013  | 0.621668 | 0.725425 | -6.37324 |
| LOR       | 0.106323 | -0.11592 | 0.480721 | 0.636242 | 0.737447 | -6.37326 |
| STIP1     | -0.17188 | 0.557922 | -0.50124 | 0.62171  | 0.725425 | -6.37327 |
| LOC100128 | -0.14892 | 0.076909 | -0.50121 | 0.621735 | 0.725425 | -6.37329 |
| SLC1C1    | 0.096274 | 0.05535  | 0.501138 | 0.621782 | 0.725425 | -6.37332 |
| SLC2A8    | 0.091385 | 0.333915 | 0.501109 | 0.621802 | 0.725425 | -6.37334 |
| SLC30A6   | 0.172817 | 0.10369  | 0.501061 | 0.621835 | 0.725425 | -6.37336 |
| C16orf48  | -0.06454 | 0.245756 | -0.50084 | 0.621986 | 0.725537 | -6.37347 |
| NEURL1B   | 0.103813 | -0.06883 | 0.500815 | 0.622005 | 0.725537 | -6.37349 |
| UBR2      | -0.10882 | 0.031296 | -0.5006  | 0.622157 | 0.725671 | -6.3736  |
| CCT2      | -0.15536 | -0.1691  | -0.50035 | 0.622325 | 0.725824 | -6.37372 |
| KDSR      | -0.14282 | 0.109205 | -0.50003 | 0.62255  | 0.726    | -6.37389 |
| ZNF727    | -0.10573 | -0.25598 | -0.49959 | 0.62285  | 0.726306 | -6.37411 |
| ZACN      | -0.11572 | 0.472055 | -0.49946 | 0.622945 | 0.726363 | -6.37418 |
| KCNE4     | -0.07519 | -0.03211 | -0.49942 | 0.622973 | 0.726363 | -6.3742  |
| RCAN1     | 0.135294 | -0.06786 | 0.331502 | 0.744349 | 0.825678 | -6.37422 |
| PREX2     | 0.150855 | 0.090513 | 0.498974 | 0.623278 | 0.726633 | -6.37442 |
| IQCK      | -0.10292 | -0.05326 | -0.49895 | 0.623298 | 0.726633 | -6.37444 |
| KIF13B    | 0.106581 | 0.103849 | 0.49892  | 0.623315 | 0.726633 | -6.37445 |
| FAM183A   | -0.21695 | 0.419781 | -0.47823 | 0.637981 | 0.739025 | -6.37448 |
| GSK3A     | 0.081274 | 0.092481 | 0.498573 | 0.623556 | 0.726827 | -6.37462 |
| ACOT11    | 0.145709 | 0.087425 | 0.498348 | 0.623711 | 0.726964 | -6.37474 |
| HPSE      | 0.144936 | 0.086962 | 0.498249 | 0.62378  | 0.727001 | -6.37479 |
| TTC23L    | 0.060728 | -0.05893 | 0.49818  | 0.623828 | 0.727014 | -6.37482 |
| SLC7A8    | 0.143056 | 0.085834 | 0.498    | 0.623952 | 0.727061 | -6.37491 |
| HCG4B     | 0.141941 | 0.085165 | 0.497848 | 0.624057 | 0.727061 | -6.37499 |
| ISOC2     | 0.116105 | 0.174128 | 0.497848 | 0.624058 | 0.727061 | -6.37499 |
| WFDC8     | 0.141271 | 0.084762 | 0.497756 | 0.624122 | 0.727061 | -6.37504 |
| PRTN3     | -0.41037 | 0.415825 | -0.49775 | 0.624128 | 0.727061 | -6.37504 |

|          |          |          |          |          |          |          |
|----------|----------|----------|----------|----------|----------|----------|
| RBM12B   | -0.19763 | 0.269978 | -0.477   | 0.63884  | 0.739815 | -6.37507 |
| ASF1A    | 0.114734 | -0.19199 | 0.4974   | 0.624368 | 0.72726  | -6.37522 |
| MTMR2    | 0.10254  | -0.07708 | 0.497392 | 0.624374 | 0.72726  | -6.37522 |
| TUSC3    | 0.18968  | 0.059945 | 0.497226 | 0.624488 | 0.727351 | -6.3753  |
| HLA-E    | -0.09114 | 0.221698 | -0.49681 | 0.624775 | 0.727602 | -6.37551 |
| TCTN2    | 0.108346 | 0.063874 | 0.496808 | 0.624778 | 0.727602 | -6.37551 |
| ADAMTSL1 | -0.1297  | 0.094314 | -0.49667 | 0.624876 | 0.727673 | -6.37559 |
| MGC2889  | -0.10309 | 0.074941 | -0.47591 | 0.6396   | 0.740462 | -6.3756  |
| RAPGEF6  | 0.132911 | 0.079747 | 0.49648  | 0.625005 | 0.727755 | -6.37568 |
| TMEM87A  | -0.07506 | -0.33662 | -0.49646 | 0.625022 | 0.727755 | -6.37569 |
| CA3      | 0.187214 | 0.275884 | 0.496404 | 0.625058 | 0.727755 | -6.37572 |
| SLC35D2  | -0.0922  | 0.25113  | -0.38207 | 0.706676 | 0.794258 | -6.3758  |
| CCL22    | -0.04011 | -0.02533 | -0.38204 | 0.706701 | 0.794258 | -6.37582 |
| FAM174B  | 0.155146 | 0.197647 | 0.496112 | 0.62526  | 0.727881 | -6.37587 |
| PDSS2    | -0.11645 | 0.196012 | -0.47535 | 0.639994 | 0.740787 | -6.37587 |
| SDK1     | 0.139437 | 0.250777 | 0.496086 | 0.625278 | 0.727881 | -6.37588 |
| FSHR     | -0.11125 | 0.118089 | -0.49593 | 0.625389 | 0.727967 | -6.37596 |
| CPLX1    | -0.15653 | 0.2277   | -0.49585 | 0.625439 | 0.727983 | -6.376   |
| IFT81    | -0.14503 | 0.190356 | -0.49555 | 0.625649 | 0.728169 | -6.37615 |
| ALDH9A1  | 0.111326 | 0.108375 | 0.495515 | 0.625674 | 0.728169 | -6.37617 |
| XKRX     | 0.176671 | 0.253124 | 0.474216 | 0.640789 | 0.741181 | -6.37642 |
| LOC64710 | 0.126724 | 0.10204  | 0.380324 | 0.707953 | 0.795301 | -6.37648 |
| FN1      | 0.138928 | 0.224934 | 0.494805 | 0.626166 | 0.728698 | -6.37652 |
| C3orf55  | -0.13261 | 0.047847 | -0.47341 | 0.641352 | 0.741741 | -6.37681 |
| NKAIN3   | 0.120968 | 0.072581 | 0.494204 | 0.626583 | 0.72914  | -6.37682 |
| AASDH    | 0.119133 | 0.07148  | 0.493796 | 0.626866 | 0.729356 | -6.37703 |
| PLCXD1   | 0.129066 | 0.143113 | 0.493715 | 0.626922 | 0.729356 | -6.37707 |
| GCNT2    | 0.118552 | 0.071131 | 0.493663 | 0.626958 | 0.729356 | -6.37709 |
| HNRNPL   | -0.08005 | 0.031801 | -0.49365 | 0.626968 | 0.729356 | -6.3771  |
| LOC10013 | -0.03874 | 0.007748 | -0.49364 | 0.626972 | 0.729356 | -6.3771  |
| CNST     | -0.16621 | -0.06041 | -0.49351 | 0.627062 | 0.729394 | -6.37717 |
| ZNF844   | 0.117134 | 0.07028  | 0.49333  | 0.627189 | 0.729499 | -6.37726 |
| RNF219   | -0.10663 | -0.52574 | -0.49311 | 0.627342 | 0.729633 | -6.37737 |
| ELANE    | 0.394036 | -0.00191 | 0.492762 | 0.627583 | 0.729871 | -6.37755 |
| FLJ42393 | -0.29112 | 0.828196 | -0.4927  | 0.627623 | 0.729874 | -6.37757 |
| FLJ34503 | 0.055305 | -0.04939 | 0.471672 | 0.64257  | 0.74276  | -6.37765 |
| ORAI1    | -0.19486 | 0.352279 | -0.49253 | 0.627742 | 0.729969 | -6.37766 |
| LOC10014 | -0.12556 | -0.03729 | -0.49244 | 0.627809 | 0.730003 | -6.37771 |
| MYC      | 0.18243  | 0.063324 | 0.492246 | 0.627942 | 0.730114 | -6.3778  |
| EXOC3L1  | 0.186379 | 0.257076 | 0.492016 | 0.628101 | 0.730256 | -6.37792 |
| DMP1     | 0.18709  | -0.10351 | 0.491846 | 0.62822  | 0.730351 | -6.378   |
| MATN2    | -0.16694 | 0.109546 | -0.49157 | 0.628414 | 0.730533 | -6.37814 |
| NPY2R    | 0.109208 | 0.065525 | 0.491242 | 0.628639 | 0.730752 | -6.3783  |
| FABP6    | 0.040694 | -0.07344 | 0.151958 | 0.880923 | 0.927053 | -6.37833 |
| SPEG     | 0.17519  | 0.184186 | 0.490316 | 0.629282 | 0.731369 | -6.37877 |
| HOTAIR   | 0.135076 | 0.107455 | 0.490113 | 0.629423 | 0.731464 | -6.37887 |
| LOC10028 | 0.08707  | -0.19231 | 0.490091 | 0.629438 | 0.731464 | -6.37888 |

|           |          |          |          |          |          |          |
|-----------|----------|----------|----------|----------|----------|----------|
| DKK1      | -0.13742 | 0.116207 | -0.46864 | 0.644697 | 0.744329 | -6.3791  |
| PECAM1    | 0.16139  | -0.0438  | 0.488977 | 0.630213 | 0.732194 | -6.37943 |
| CLEC7A    | 0.102104 | 0.061262 | 0.488972 | 0.630216 | 0.732194 | -6.37943 |
| MRPL50    | -0.1508  | -0.22621 | -0.48892 | 0.630253 | 0.732194 | -6.37946 |
| C9orf21   | -0.10535 | 0.004809 | -0.44211 | 0.663712 | 0.759713 | -6.37952 |
| LOC100506 | 0.17982  | 0.015317 | 0.488647 | 0.630442 | 0.73237  | -6.37959 |
| CAMK2A    | -0.09872 | -0.19096 | -0.46742 | 0.645551 | 0.745022 | -6.37967 |
| LOC440934 | 0.099972 | 0.059983 | 0.488202 | 0.630752 | 0.732599 | -6.37981 |
| CGB2      | 0.078223 | -0.06917 | 0.488117 | 0.630811 | 0.732625 | -6.37986 |
| FCGR3A    | 0.114028 | 0.108286 | 0.487874 | 0.63098  | 0.732729 | -6.37998 |
| LOC100505 | -0.16231 | 0.010182 | -0.48784 | 0.631007 | 0.732729 | -6.38    |
| SLC7A11   | -0.10907 | 0.092978 | -0.48783 | 0.631013 | 0.732729 | -6.38    |
| LOC401433 | -0.08177 | 0.382582 | -0.1407  | 0.889681 | 0.933612 | -6.38002 |
| CD33      | -0.17678 | 0.110065 | -0.48771 | 0.631096 | 0.732782 | -6.38006 |
| BRIP1     | 0.097784 | 0.058671 | 0.487363 | 0.631336 | 0.732998 | -6.38023 |
| GPR98     | 0.097707 | 0.058624 | 0.487333 | 0.631357 | 0.732998 | -6.38024 |
| PEX12     | -0.10407 | 0.097932 | -0.48712 | 0.631508 | 0.73313  | -6.38035 |
| TMEM140   | -0.20263 | 0.612451 | -0.48689 | 0.631667 | 0.733272 | -6.38047 |
| MCCD1     | 0.071038 | -0.11643 | 0.486621 | 0.631852 | 0.733443 | -6.3806  |
| DNAH8     | 0.092557 | 0.032901 | 0.486482 | 0.631949 | 0.733478 | -6.38067 |
| RAB9A     | -0.07933 | 0.046815 | -0.48647 | 0.631957 | 0.733478 | -6.38067 |
| ABCA13    | -0.10744 | 0.204872 | -0.1337  | 0.895135 | 0.937389 | -6.381   |
| CCDC65    | -0.01404 | -0.32626 | -0.04498 | 0.964654 | 0.985117 | -6.38103 |
| DCUN1D4   | -0.15161 | -0.22029 | -0.43852 | 0.666264 | 0.7617   | -6.38113 |
| HRASLS2   | 0.200292 | 0.576391 | 0.484901 | 0.63305  | 0.734685 | -6.38144 |
| USP10     | 0.17513  | -0.01008 | 0.484869 | 0.633073 | 0.734685 | -6.38146 |
| DEFB1     | 0.251086 | -0.24926 | 0.405103 | 0.690494 | 0.780971 | -6.38157 |
| DLX2      | -0.12359 | -0.04489 | -0.48454 | 0.633304 | 0.73491  | -6.38162 |
| LOC90834  | 0.091077 | 0.054646 | 0.484438 | 0.633373 | 0.734947 | -6.38167 |
| TRIT1     | -0.01026 | 0.373199 | -0.02767 | 0.978251 | 0.994854 | -6.38167 |
| LOC100506 | 0.065679 | -0.16648 | 0.308719 | 0.761317 | 0.839415 | -6.3817  |
| LOC100283 | 0.110269 | -0.00423 | 0.484007 | 0.633674 | 0.735229 | -6.38188 |
| ACTG2     | 0.170183 | 0.328103 | 0.483948 | 0.633715 | 0.735229 | -6.38191 |
| LOC100503 | 0.089924 | 0.053954 | 0.483874 | 0.633766 | 0.735229 | -6.38195 |
| CCKBR     | -0.18968 | 0.175386 | -0.48387 | 0.633767 | 0.735229 | -6.38195 |
| IL5       | 0.122449 | -0.23195 | 0.365066 | 0.719123 | 0.804714 | -6.38228 |
| IMPG1     | -0.17449 | 0.022007 | -0.36506 | 0.719126 | 0.804714 | -6.38228 |
| PBLD      | -0.16269 | 0.194948 | -0.48263 | 0.634637 | 0.736068 | -6.38256 |
| ECHDC2    | 0.12857  | -0.04278 | 0.482572 | 0.634675 | 0.736068 | -6.38259 |
| WWP1      | 0.111024 | -0.39393 | 0.482568 | 0.634677 | 0.736068 | -6.38259 |
| LIG4      | 0.119228 | 0.071537 | 0.482388 | 0.634803 | 0.73617  | -6.38268 |
| GJB2      | -0.16909 | 0.215549 | -0.4822  | 0.634935 | 0.73628  | -6.38277 |
| NUP133    | -0.07865 | 0.139535 | -0.33791 | 0.739369 | 0.821762 | -6.38279 |
| APPBP2    | 0.073193 | -0.19105 | 0.481748 | 0.63525  | 0.736558 | -6.38299 |
| MSTO1     | 0.102992 | 0.150379 | 0.481005 | 0.635769 | 0.737028 | -6.38335 |
| HIST1H4L  | -0.13014 | -0.47545 | -0.48079 | 0.635921 | 0.737161 | -6.38346 |
| PKI55     | 0.035067 | -0.15816 | 0.113897 | 0.91059  | 0.948392 | -6.38352 |

|           |          |          |          |          |          |          |
|-----------|----------|----------|----------|----------|----------|----------|
| PARP14    | -0.18342 | 0.321453 | -0.48046 | 0.636149 | 0.737382 | -6.38362 |
| WDR92     | -0.09902 | 0.288259 | -0.47987 | 0.63656  | 0.737771 | -6.38391 |
| FAM200B   | -0.1825  | 0.106044 | -0.47974 | 0.63665  | 0.737831 | -6.38397 |
| ACTL8     | 0.115989 | -0.14012 | 0.479581 | 0.636763 | 0.737919 | -6.38405 |
| ATRN      | -0.10569 | 0.015071 | -0.47947 | 0.636837 | 0.737961 | -6.3841  |
| LRRC40    | -0.18477 | -0.00025 | -0.47913 | 0.637081 | 0.738201 | -6.38427 |
| OR12D3    | 0.093461 | -0.19242 | 0.478771 | 0.637329 | 0.738444 | -6.38444 |
| LOC100147 | 0.049072 | -0.20038 | 0.104843 | 0.917669 | 0.953029 | -6.38454 |
| CXADRP2   | -0.05461 | 0.012136 | -0.43047 | 0.672001 | 0.766336 | -6.3847  |
| LYRM4     | 0.142499 | -0.07305 | 0.478215 | 0.637718 | 0.738805 | -6.38471 |
| CECR5-AS1 | -0.09787 | -0.07701 | -0.47816 | 0.637754 | 0.738805 | -6.38474 |
| LY9       | 0.166638 | 0.349666 | 0.477505 | 0.638214 | 0.739251 | -6.38506 |
| LOC253801 | -0.07535 | -0.18677 | -0.42955 | 0.672662 | 0.766822 | -6.38511 |
| RAF1      | -0.09626 | 0.119688 | -0.47677 | 0.638726 | 0.739796 | -6.38541 |
| MRAS      | 0.152262 | 0.162523 | 0.476725 | 0.63876  | 0.739796 | -6.38543 |
| TRIM36    | 0.099083 | -0.16398 | 0.296682 | 0.770332 | 0.845677 | -6.38544 |
| TMEM74    | 0.037389 | -0.0237  | 0.476593 | 0.638852 | 0.739815 | -6.3855  |
| ITSN1     | -0.18807 | 0.373883 | -0.47634 | 0.639026 | 0.739973 | -6.38562 |
| DSCR4     | 0.02475  | -0.20298 | 0.094101 | 0.926077 | 0.958965 | -6.38563 |
| C22orf29  | 0.073198 | 0.268344 | 0.476272 | 0.639077 | 0.739988 | -6.38565 |
| SPIRE1    | -0.13318 | -0.03164 | -0.45464 | 0.654558 | 0.752268 | -6.38567 |
| CLDN11    | 0.217067 | 0.059191 | 0.476072 | 0.639217 | 0.740106 | -6.38575 |
| PATZ1     | 0.210965 | 0.352653 | 0.475622 | 0.639532 | 0.740427 | -6.38597 |
| GALNT4    | -0.07615 | -0.04569 | -0.47528 | 0.639769 | 0.740614 | -6.38613 |
| B3GNT8    | -0.1233  | 0.020726 | -0.47508 | 0.639913 | 0.740737 | -6.38623 |
| RBM43     | -0.0436  | -0.01889 | -0.4749  | 0.640037 | 0.740793 | -6.38632 |
| CROT      | 0.140973 | -0.16751 | 0.453207 | 0.655569 | 0.753164 | -6.38633 |
| ANKRD5    | 0.129837 | -0.15915 | 0.47474  | 0.64015  | 0.740877 | -6.38639 |
| CEP89     | 0.218977 | 0.416332 | 0.474689 | 0.640185 | 0.740877 | -6.38642 |
| WDR89     | -0.03346 | -0.01013 | -0.47462 | 0.640234 | 0.74089  | -6.38645 |
| LRIT2     | -0.13502 | 0.027569 | -0.47456 | 0.640279 | 0.740897 | -6.38648 |
| PLA2G15   | -0.09546 | 0.142583 | -0.47442 | 0.640371 | 0.740917 | -6.38655 |
| KIAA0895  | 0.113029 | 0.316659 | 0.353407 | 0.727702 | 0.811815 | -6.38655 |
| CLIP3     | 0.154491 | 0.296534 | 0.474327 | 0.640439 | 0.740917 | -6.38659 |
| LOC100506 | -0.06479 | -0.09423 | -0.47406 | 0.640625 | 0.741079 | -6.38672 |
| MAGEA12   | 0.083444 | -0.15722 | 0.352918 | 0.728062 | 0.812025 | -6.38673 |
| LOC389761 | 0.110418 | -0.17674 | 0.473939 | 0.640711 | 0.741135 | -6.38678 |
| NDUFA5    | 0.170554 | 0.034846 | 0.473196 | 0.641231 | 0.74165  | -6.38714 |
| CSMD2     | -0.06981 | -0.15907 | -0.29079 | 0.774758 | 0.84879  | -6.38722 |
| TREM1     | -0.15975 | 0.52133  | -0.47298 | 0.641386 | 0.741741 | -6.38724 |
| FAM98B    | -0.12549 | -0.25546 | -0.42462 | 0.676183 | 0.769583 | -6.38726 |
| CLCN5     | 0.057478 | -0.02116 | 0.472853 | 0.641472 | 0.741797 | -6.3873  |
| STMN3     | -0.15678 | 0.261274 | -0.47248 | 0.641733 | 0.742055 | -6.38748 |
| ANO8      | 0.028012 | -0.0056  | 0.472421 | 0.641775 | 0.74206  | -6.38751 |
| HN1L      | 0.110699 | 0.203325 | 0.472123 | 0.641984 | 0.742257 | -6.38765 |
| LOC440337 | 0.085634 | -0.56882 | 0.283085 | 0.781016 | 0.853165 | -6.38771 |
| AAMP      | -0.09828 | 0.225527 | -0.47195 | 0.642104 | 0.742352 | -6.38773 |

|           |          |          |          |          |          |          |
|-----------|----------|----------|----------|----------|----------|----------|
| CFH       | 0.249505 | -0.41325 | 0.423077 | 0.677288 | 0.770411 | -6.38793 |
| DMRTC2    | 0.140371 | 0.00641  | 0.4715   | 0.642421 | 0.742675 | -6.38795 |
| LOC100293 | 0.109482 | -0.19795 | 0.471034 | 0.642748 | 0.742834 | -6.38817 |
| LOC100133 | -0.02265 | 0.251472 | -0.06224 | 0.951063 | 0.976437 | -6.38819 |
| JOSD2     | 0.097593 | -0.16354 | 0.470928 | 0.642822 | 0.742836 | -6.38822 |
| SLC25A31  | 0.071024 | 0.042614 | 0.470923 | 0.642825 | 0.742836 | -6.38823 |
| IL21R     | -0.15025 | 0.137322 | -0.47073 | 0.642959 | 0.742946 | -6.38832 |
| MYBPC1    | -0.01972 | -0.16743 | -0.05609 | 0.955893 | 0.979272 | -6.38856 |
| FAM86A    | 0.186076 | 0.118791 | 0.470154 | 0.643366 | 0.743328 | -6.38859 |
| SVIP      | 0.069987 | 0.041992 | 0.46994  | 0.643516 | 0.743449 | -6.3887  |
| ZNF621    | 0.065536 | -0.37141 | 0.469888 | 0.643552 | 0.743449 | -6.38872 |
| TMEM105   | 0.081113 | -0.27894 | 0.469843 | 0.643584 | 0.743449 | -6.38874 |
| TMEM67    | -0.0292  | -0.01844 | -0.34719 | 0.732294 | 0.815816 | -6.38878 |
| VSTM2B    | -0.2191  | -0.08075 | -0.46952 | 0.643813 | 0.743669 | -6.3889  |
| TRPV6     | 0.069402 | -0.15151 | 0.469446 | 0.643862 | 0.743683 | -6.38893 |
| ROPN1     | -0.19874 | 0.137696 | -0.46911 | 0.6441   | 0.743913 | -6.38909 |
| LIMD1     | -0.12859 | 0.170005 | -0.46866 | 0.644412 | 0.744186 | -6.3893  |
| PNKD      | -0.08473 | 0.029908 | -0.46845 | 0.644564 | 0.744318 | -6.38941 |
| CENPV     | -0.2197  | 0.281786 | -0.4463  | 0.660463 | 0.757588 | -6.3895  |
| DPT       | -0.04615 | 0.038748 | -0.46823 | 0.644719 | 0.744329 | -6.38951 |
| FNIP1     | 0.174099 | 0.104459 | 0.468193 | 0.644743 | 0.744329 | -6.38953 |
| ISLR2     | -0.05616 | -0.03682 | -0.46816 | 0.644763 | 0.744329 | -6.38954 |
| LOC100506 | -0.17889 | 0.074843 | -0.46797 | 0.6449   | 0.744443 | -6.38963 |
| LPAR4     | 0.032459 | -0.01918 | 0.445736 | 0.660861 | 0.757689 | -6.38975 |
| KCNE2     | 0.07088  | -0.13408 | 0.445584 | 0.660969 | 0.757769 | -6.38982 |
| A1BG-AS1  | -0.0918  | 0.104408 | -0.46735 | 0.645334 | 0.744856 | -6.38993 |
| TBCCD1    | 0.130732 | 0.195815 | 0.445258 | 0.6612   | 0.757812 | -6.38997 |
| DAZAP1    | -0.12114 | 0.294877 | -0.34369 | 0.73488  | 0.817999 | -6.39001 |
| OPHN1     | -0.02766 | 0.005532 | -0.46704 | 0.645554 | 0.745022 | -6.39008 |
| ATP5O     | -0.14025 | -0.18899 | -0.46656 | 0.645888 | 0.745363 | -6.3903  |
| PIK3R4    | -0.10801 | 0.078806 | -0.46615 | 0.646179 | 0.745656 | -6.3905  |
| EPT1      | 0.098545 | -0.12292 | 0.465649 | 0.646531 | 0.745982 | -6.39073 |
| SLC10A3   | -0.07481 | 0.205691 | -0.46564 | 0.646538 | 0.745982 | -6.39074 |
| TRIM32    | 0.18079  | 0.181853 | 0.465175 | 0.646865 | 0.746316 | -6.39096 |
| DTX3      | -0.16925 | 0.681527 | -0.46458 | 0.647287 | 0.746671 | -6.39124 |
| MSTN      | 0.064944 | 0.038966 | 0.464575 | 0.647287 | 0.746671 | -6.39124 |
| ZNF594    | 0.08017  | 0.062787 | 0.464366 | 0.647435 | 0.746797 | -6.39134 |
| C18orf26  | 0.064714 | 0.038828 | 0.464305 | 0.647477 | 0.746802 | -6.39137 |
| MAGEC3    | -0.13157 | -0.05571 | -0.46388 | 0.647775 | 0.747014 | -6.39157 |
| TRGV7     | 0.113636 | -0.21735 | 0.46382  | 0.647819 | 0.747014 | -6.3916  |
| DDX55     | -0.23985 | 0.650655 | -0.46376 | 0.64786  | 0.747014 | -6.39163 |
| DLL3      | -0.15172 | -0.01503 | -0.46375 | 0.647869 | 0.747014 | -6.39163 |
| FAM203A   | 0.125527 | 0.195183 | 0.463714 | 0.647893 | 0.747014 | -6.39165 |
| TRPM3     | 0.099996 | 0.031918 | 0.463675 | 0.647921 | 0.747014 | -6.39167 |
| CHGB      | -0.27424 | 0.265636 | -0.46366 | 0.647928 | 0.747014 | -6.39167 |
| SAMD14    | 0.214265 | 0.750996 | 0.463501 | 0.648043 | 0.747103 | -6.39175 |
| C2orf42   | -0.12532 | 0.486863 | -0.46327 | 0.648205 | 0.747245 | -6.39186 |



|           |          |          |          |          |          |          |
|-----------|----------|----------|----------|----------|----------|----------|
| ENPP1     | -0.0507  | -0.07113 | -0.46321 | 0.64825  | 0.747253 | -6.39189 |
| CDKN2B    | 0.211981 | 0.384543 | 0.463128 | 0.648306 | 0.747274 | -6.39192 |
| CPEB2     | -0.14551 | 0.445339 | -0.46298 | 0.648412 | 0.747352 | -6.39199 |
| MYH11     | -0.18014 | 0.264461 | -0.46291 | 0.648457 | 0.74736  | -6.39202 |
| TPCN1     | 0.145067 | 0.512683 | 0.462732 | 0.648585 | 0.747464 | -6.39211 |
| STRN      | -0.12534 | 0.005673 | -0.4624  | 0.648817 | 0.747643 | -6.39226 |
| CHAF1A    | -0.11163 | 0.245713 | -0.46174 | 0.649285 | 0.748094 | -6.39258 |
| ESRRG     | 0.062421 | 0.037453 | 0.461476 | 0.64947  | 0.748264 | -6.3927  |
| C1orf93   | 0.095415 | 0.270523 | 0.46124  | 0.649636 | 0.748383 | -6.39281 |
| SERHL2    | 0.088283 | 0.006387 | 0.461203 | 0.649663 | 0.748383 | -6.39283 |
| GABRA4    | -0.10673 | -0.06404 | -0.46117 | 0.649689 | 0.748383 | -6.39285 |
| PUS1      | -0.11869 | 0.294739 | -0.46086 | 0.649905 | 0.748545 | -6.39299 |
| GEN1      | 0.119538 | -0.18919 | 0.460713 | 0.650008 | 0.748619 | -6.39306 |
| COPG      | 0.084384 | 0.251864 | 0.460563 | 0.650114 | 0.748698 | -6.39313 |
| C14orf2   | 0.169562 | -0.83454 | 0.460307 | 0.650295 | 0.748861 | -6.39325 |
| ATP6VOC   | -0.11093 | 0.400454 | -0.46022 | 0.650358 | 0.74889  | -6.39329 |
| RGMB      | -0.03401 | -0.01728 | -0.43778 | 0.666517 | 0.761812 | -6.39333 |
| CDAN1     | -0.11929 | 0.130619 | -0.43762 | 0.666633 | 0.761899 | -6.3934  |
| NDUFS4    | 0.147207 | -0.64592 | 0.459793 | 0.650657 | 0.749191 | -6.39349 |
| HECW2     | -0.06091 | 0.069767 | -0.33321 | 0.742648 | 0.824211 | -6.39363 |
| AOC3      | -0.11836 | 0.600312 | -0.45927 | 0.651026 | 0.749555 | -6.39373 |
| WBP5      | 0.169247 | -0.09077 | 0.459228 | 0.651056 | 0.749555 | -6.39375 |
| CDKN1B    | -0.11621 | -0.15927 | -0.45914 | 0.651121 | 0.749555 | -6.39379 |
| SPECC1    | 0.143046 | 0.121079 | 0.459128 | 0.651127 | 0.749555 | -6.3938  |
| PROCA1    | -0.07759 | 0.318503 | -0.45901 | 0.651209 | 0.749606 | -6.39385 |
| LOC28314  | -0.12512 | -0.06755 | -0.43655 | 0.66739  | 0.762498 | -6.39388 |
| SMPDL3B   | -0.08402 | 0.270932 | -0.4589  | 0.65129  | 0.749655 | -6.39391 |
| C5orf41   | 0.156836 | -0.24201 | 0.458815 | 0.651348 | 0.749677 | -6.39394 |
| C10orf140 | -0.02866 | -0.0181  | -0.33194 | 0.743593 | 0.825073 | -6.39406 |
| VASH1     | 0.220387 | 0.253594 | 0.45853  | 0.651548 | 0.749864 | -6.39408 |
| MCOLN1    | -0.12117 | 0.024186 | -0.45812 | 0.651837 | 0.750143 | -6.39427 |
| RGS11     | 0.106393 | -0.32265 | 0.458079 | 0.651867 | 0.750143 | -6.39429 |
| IGSF8     | -0.1113  | 0.446009 | -0.45782 | 0.65205  | 0.750309 | -6.39441 |
| EXOC3L4   | 0.075616 | 0.140129 | 0.265625 | 0.793748 | 0.862266 | -6.39442 |
| JAM3      | 0.184417 | 0.480148 | 0.457288 | 0.652426 | 0.750698 | -6.39465 |
| USMG5     | -0.12495 | -0.4093  | -0.45718 | 0.6525   | 0.75072  | -6.3947  |
| PTCD1     | -0.08928 | 0.252138 | -0.45715 | 0.652522 | 0.75072  | -6.39472 |
| ETHE1     | -0.08516 | 0.019768 | -0.45708 | 0.652571 | 0.750732 | -6.39475 |
| MAGEH1    | 0.143457 | -0.04349 | 0.456947 | 0.652666 | 0.750798 | -6.39481 |
| FLJ40292  | 0.06924  | -0.10615 | 0.456764 | 0.652796 | 0.750903 | -6.3949  |
| LOC10012  | -0.12119 | -0.44389 | -0.37148 | 0.714904 | 0.801409 | -6.39495 |
| C17orf74  | 0.086115 | -0.32857 | 0.456344 | 0.653093 | 0.7512   | -6.39509 |
| SGMS1     | 0.178783 | 0.013058 | 0.455937 | 0.65338  | 0.751487 | -6.39528 |
| HSD17B12  | -0.21673 | -0.23037 | -0.45577 | 0.653495 | 0.751575 | -6.39536 |
| AVIL      | -0.19751 | 0.758192 | -0.45545 | 0.653724 | 0.751759 | -6.39551 |
| FAM86C2P  | -0.16675 | 0.210927 | -0.4554  | 0.653762 | 0.751759 | -6.39553 |
| REG3A     | 0.066367 | -0.09942 | 0.455386 | 0.65377  | 0.751759 | -6.39554 |

|          |          |          |          |          |          |          |
|----------|----------|----------|----------|----------|----------|----------|
| DNAJB3   | 0.064867 | -0.15209 | 0.455221 | 0.653886 | 0.751804 | -6.39561 |
| GTF2F1   | -0.06272 | 0.239525 | -0.45496 | 0.654069 | 0.751971 | -6.39573 |
| MUTYH    | -0.1078  | 0.246997 | -0.45481 | 0.654177 | 0.752006 | -6.3958  |
| C10orf11 | 0.135345 | 0.254205 | 0.454772 | 0.654204 | 0.752006 | -6.39582 |
| GOLIM4   | -0.07254 | -0.10038 | -0.45449 | 0.654403 | 0.752178 | -6.39595 |
| SERINC5  | 0.073414 | -0.02346 | 0.454436 | 0.654442 | 0.752178 | -6.39598 |
| PLEC     | -0.09976 | 0.158211 | -0.45382 | 0.654877 | 0.752573 | -6.39626 |
| CDC37L1  | -0.13711 | -0.19187 | -0.45379 | 0.654901 | 0.752573 | -6.39628 |
| ZBTB6    | -0.13764 | -0.2014  | -0.40291 | 0.691792 | 0.781852 | -6.39643 |
| BMP4     | -0.05525 | -0.28199 | -0.2581  | 0.799452 | 0.866445 | -6.39644 |
| APOA1    | -0.05596 | 0.057922 | -0.45342 | 0.655157 | 0.752808 | -6.39644 |
| KIF7     | 0.097277 | -0.28237 | 0.324802 | 0.748905 | 0.829464 | -6.39646 |
| KDM2B    | -0.12024 | 0.415511 | -0.45339 | 0.655182 | 0.752808 | -6.39646 |
| ARMCX5   | -0.13823 | -0.13342 | -0.45311 | 0.655379 | 0.75299  | -6.39659 |
| TTC31    | 0.076347 | -0.01948 | 0.452666 | 0.655694 | 0.753264 | -6.39679 |
| CISD3    | 0.109644 | -0.04725 | 0.4525   | 0.655811 | 0.753355 | -6.39687 |
| PHF7     | -0.10409 | -0.01263 | -0.45242 | 0.655867 | 0.753375 | -6.3969  |
| POLI     | -0.11547 | 0.097446 | -0.42925 | 0.672602 | 0.766798 | -6.3971  |
| SDC3     | -0.14228 | 0.385233 | -0.45199 | 0.656176 | 0.753654 | -6.3971  |
| ZNF259   | -0.08077 | 0.191165 | -0.45193 | 0.656218 | 0.753654 | -6.39713 |
| C18orf56 | -0.08054 | 0.107241 | -0.45191 | 0.656226 | 0.753654 | -6.39714 |
| LIN52    | -0.16148 | 0.227982 | -0.42905 | 0.672745 | 0.766872 | -6.39719 |
| EPHA3    | 0.055823 | 0.033494 | 0.451713 | 0.656369 | 0.753771 | -6.39723 |
| MDH1     | -0.1211  | -0.20824 | -0.45166 | 0.656404 | 0.753771 | -6.39725 |
| LRRC31   | -0.124   | 0.01437  | -0.45124 | 0.656704 | 0.754071 | -6.39745 |
| CCDC164  | -0.20747 | 0.461082 | -0.45097 | 0.656894 | 0.754244 | -6.39757 |
| MN1      | 0.181708 | 0.109955 | 0.450811 | 0.657008 | 0.754331 | -6.39764 |
| QTRT1    | 0.114961 | 0.023146 | 0.450662 | 0.657114 | 0.754408 | -6.39771 |
| WNT3A    | -0.10661 | -0.0807  | -0.45053 | 0.657208 | 0.754472 | -6.39777 |
| NUDT9    | -0.20358 | 0.52543  | -0.45008 | 0.657523 | 0.75479  | -6.39798 |
| SP4      | -0.06675 | -0.06836 | -0.42712 | 0.674127 | 0.767912 | -6.39803 |
| ZNF750   | 0.151255 | 0.090753 | 0.449949 | 0.657619 | 0.754856 | -6.39804 |
| MUCL1    | -0.08301 | 0.065847 | -0.44917 | 0.658171 | 0.755407 | -6.39839 |
| NMT2     | 0.216714 | 0.186727 | 0.449163 | 0.658176 | 0.755407 | -6.3984  |
| GKN2     | -0.11743 | 0.047587 | -0.44891 | 0.658355 | 0.755568 | -6.39851 |
| HPX-2    | -0.10766 | -0.14525 | -0.44783 | 0.659122 | 0.756404 | -6.39901 |
| SLC30A2  | -0.0545  | 0.145295 | -0.44739 | 0.659436 | 0.75672  | -6.39921 |
| VSIG4    | -0.26819 | 0.060037 | -0.44709 | 0.659648 | 0.756919 | -6.39934 |
| RPS24    | 0.24813  | -0.7645  | 0.446937 | 0.659755 | 0.756975 | -6.39941 |
| LAMP3    | 0.23852  | -0.03078 | 0.446909 | 0.659775 | 0.756975 | -6.39942 |
| COX4I1   | 0.077667 | -0.24614 | 0.446659 | 0.659953 | 0.757135 | -6.39954 |
| UBQLNL   | -0.15086 | 0.559767 | -0.28519 | 0.778777 | 0.851907 | -6.39961 |
| CTSH     | -0.09048 | -0.00618 | -0.4465  | 0.660069 | 0.757224 | -6.39961 |
| KIAA1107 | 0.168167 | -0.01609 | 0.315107 | 0.756139 | 0.835185 | -6.39963 |
| EEFSEC   | 0.106813 | 0.413718 | 0.446059 | 0.660379 | 0.757535 | -6.39981 |
| MYH15    | -0.06886 | -0.34209 | -0.245   | 0.809414 | 0.874265 | -6.39983 |
| NEU4     | 0.12032  | 0.271116 | 0.445853 | 0.660525 | 0.75759  | -6.3999  |

|           |          |          |          |          |          |          |
|-----------|----------|----------|----------|----------|----------|----------|
| PDIK1L    | 0.190354 | -0.29833 | 0.422744 | 0.677261 | 0.770411 | -6.39992 |
| CDR2      | -0.17656 | 0.306981 | -0.44581 | 0.660558 | 0.75759  | -6.39992 |
| C3orf78   | 0.151556 | -0.03447 | 0.445774 | 0.660581 | 0.75759  | -6.39994 |
| TCF7L2    | 0.052517 | 0.03151  | 0.445702 | 0.660632 | 0.757604 | -6.39997 |
| CDX1      | -0.05452 | -0.10443 | -0.42263 | 0.677344 | 0.770411 | -6.39997 |
| GOSR1     | -0.07056 | -0.06173 | -0.4456  | 0.660702 | 0.757627 | -6.40002 |
| PMAIP1    | 0.155076 | -0.17833 | 0.445565 | 0.66073  | 0.757627 | -6.40003 |
| SOX12     | -0.22222 | 1.10092  | -0.44539 | 0.660856 | 0.757689 | -6.40011 |
| ASXL1     | -0.08548 | -0.11379 | -0.44517 | 0.661009 | 0.75777  | -6.40021 |
| NDUFAF4   | -0.13034 | 0.151095 | -0.283   | 0.780429 | 0.852904 | -6.40025 |
| RAB33B    | 0.052206 | 0.031324 | 0.44509  | 0.661066 | 0.757792 | -6.40025 |
| PTH1R     | -0.09588 | -0.05773 | -0.44498 | 0.661144 | 0.757812 | -6.4003  |
| LINC00309 | -0.05212 | -0.03127 | -0.44493 | 0.661182 | 0.757812 | -6.40032 |
| SMOC2     | -0.09832 | -0.02509 | -0.44483 | 0.661255 | 0.757831 | -6.40037 |
| HNRNPD    | 0.072018 | -0.20086 | 0.444733 | 0.66132  | 0.757861 | -6.40041 |
| SRCAP     | 0.085531 | 0.381264 | 0.444584 | 0.661426 | 0.757906 | -6.40048 |
| DCN       | 0.088246 | -0.18714 | 0.444569 | 0.661437 | 0.757906 | -6.40048 |
| BDH1      | 0.076768 | 0.01337  | 0.444394 | 0.661561 | 0.758004 | -6.40056 |
| SLC5A1    | 0.093485 | -0.10512 | 0.444312 | 0.66162  | 0.758027 | -6.4006  |
| EPB41L3   | 0.150143 | -0.00641 | 0.444154 | 0.661732 | 0.758111 | -6.40067 |
| LMO4      | -0.08818 | 0.107072 | -0.44405 | 0.661803 | 0.758149 | -6.40072 |
| PRELID1   | -0.06954 | 0.065227 | -0.44356 | 0.662153 | 0.758505 | -6.40094 |
| CYP1A1    | 0.078077 | -0.09051 | 0.443478 | 0.662212 | 0.758528 | -6.40098 |
| MCRS1     | -0.0746  | 0.077123 | -0.44297 | 0.662577 | 0.758857 | -6.40121 |
| ADAP2     | -0.10988 | 0.408408 | -0.44276 | 0.662725 | 0.758983 | -6.4013  |
| FAM194B   | 0.131254 | 0.059451 | 0.442617 | 0.662825 | 0.759053 | -6.40137 |
| TCEAL2    | 0.094793 | -0.43222 | 0.419034 | 0.679924 | 0.772762 | -6.40152 |
| ZNF384    | -0.06673 | 0.093829 | -0.44219 | 0.663131 | 0.759359 | -6.40156 |
| EIF2S3    | -0.10515 | 0.193106 | -0.44205 | 0.663225 | 0.759422 | -6.40162 |
| IFITM10   | -0.11289 | 0.384149 | -0.44191 | 0.663328 | 0.759496 | -6.40168 |
| THSD1     | 0.142272 | 0.038066 | 0.441722 | 0.663462 | 0.759594 | -6.40177 |
| ZFR2      | -0.06514 | -0.05952 | -0.44168 | 0.663491 | 0.759594 | -6.40179 |
| STAP2     | -0.11387 | 0.268996 | -0.44161 | 0.663543 | 0.759608 | -6.40182 |
| IER5L     | 0.099165 | 0.140633 | 0.441507 | 0.663615 | 0.759646 | -6.40186 |
| FLJ90757  | -0.19396 | 0.768999 | -0.44129 | 0.663769 | 0.759735 | -6.40196 |
| SOX2      | 0.15096  | -0.23116 | 0.441196 | 0.663836 | 0.759766 | -6.402   |
| HDDC3     | -0.10847 | 0.017035 | -0.44107 | 0.663927 | 0.759827 | -6.40206 |
| TMX2      | 0.075611 | 0.054948 | 0.440747 | 0.664155 | 0.760024 | -6.40221 |
| BIRC8     | -0.08522 | -0.13244 | -0.27615 | 0.785601 | 0.856407 | -6.40221 |
| VMO1      | -0.17457 | 0.256168 | -0.44071 | 0.664182 | 0.760024 | -6.40222 |
| TEX11     | 0.172043 | -0.07787 | 0.440661 | 0.664216 | 0.760024 | -6.40224 |
| PAEP      | -0.05084 | 0.012726 | -0.41697 | 0.681406 | 0.773685 | -6.4024  |
| SFXN4     | 0.082023 | 0.052982 | 0.440233 | 0.664521 | 0.760329 | -6.40244 |
| NBR1      | 0.091907 | -0.08607 | 0.439707 | 0.664896 | 0.760713 | -6.40267 |
| MRPL11    | -0.08847 | -0.06672 | -0.43963 | 0.664953 | 0.760734 | -6.40271 |
| PQBP1     | -0.06846 | 0.040095 | -0.43911 | 0.665323 | 0.761067 | -6.40294 |
| MACROD2   | -0.18297 | 0.022529 | -0.43902 | 0.665383 | 0.761067 | -6.40298 |

|           |          |          |          |          |          |          |
|-----------|----------|----------|----------|----------|----------|----------|
| UBE2R2    | -0.09911 | 0.352828 | -0.43901 | 0.665393 | 0.761067 | -6.40298 |
| PDXDC1    | -0.06177 | 0.178788 | -0.439   | 0.6654   | 0.761067 | -6.40299 |
| HERC5     | 0.362662 | 0.108052 | 0.438621 | 0.66567  | 0.761289 | -6.40316 |
| OPCML     | 0.095879 | 0.081084 | 0.438564 | 0.66571  | 0.761289 | -6.40318 |
| NAA11     | 0.058546 | 0.010481 | 0.438441 | 0.665798 | 0.7613   | -6.40324 |
| C12orf52  | -0.06822 | 0.288046 | -0.43804 | 0.66608  | 0.761579 | -6.40341 |
| NR1D2     | 0.127008 | 0.063865 | 0.414543 | 0.683152 | 0.775218 | -6.40343 |
| INF2      | 0.109092 | 0.30344  | 0.437805 | 0.666251 | 0.7617   | -6.40352 |
| ND1       | 0.139169 | 0.449554 | 0.437602 | 0.666395 | 0.761763 | -6.40361 |
| RUNDC3B   | 0.111157 | -0.18574 | 0.4376   | 0.666397 | 0.761763 | -6.40361 |
| STRA13    | 0.099646 | -0.01113 | 0.437536 | 0.666443 | 0.761771 | -6.40364 |
| PEG10     | -0.10196 | 0.144532 | -0.4371  | 0.666756 | 0.761996 | -6.40383 |
| MRPS35    | -0.10336 | -0.11566 | -0.43675 | 0.667002 | 0.762223 | -6.40399 |
| LYAR      | -0.07972 | 0.217358 | -0.43671 | 0.667033 | 0.762223 | -6.40401 |
| AVPR1B    | 0.047128 | -0.08852 | 0.412951 | 0.684298 | 0.776158 | -6.4041  |
| SLC25A29  | -0.12597 | 0.258307 | -0.4364  | 0.66725  | 0.762382 | -6.40414 |
| LRP4      | 0.06414  | -0.18091 | 0.412807 | 0.684402 | 0.776187 | -6.40416 |
| CYB5R2    | 0.127678 | -0.17197 | 0.435782 | 0.667694 | 0.7628   | -6.40442 |
| OCA2      | -0.02564 | 0.005128 | -0.43565 | 0.667786 | 0.762862 | -6.40448 |
| TUBGCP5   | -0.12317 | 0.109802 | -0.29943 | 0.767883 | 0.844042 | -6.40455 |
| LIPT1     | -0.1645  | -0.16679 | -0.41178 | 0.685141 | 0.776709 | -6.40459 |
| WWTR1     | -0.15343 | 0.207545 | -0.43532 | 0.668021 | 0.763077 | -6.40462 |
| FOXJ1     | 0.136538 | 0.312769 | 0.4348   | 0.668394 | 0.763418 | -6.40485 |
| NBEA      | 0.111597 | 0.071268 | 0.381887 | 0.70705  | 0.794605 | -6.40487 |
| RGS12     | 0.140589 | 0.343911 | 0.434746 | 0.668433 | 0.763418 | -6.40488 |
| GIMAP8    | 0.120823 | -0.01554 | 0.434662 | 0.668493 | 0.763418 | -6.40491 |
| LCMT1     | 0.055779 | -0.09755 | 0.434501 | 0.668608 | 0.763418 | -6.40499 |
| GPR126    | -0.09217 | -0.02675 | -0.43448 | 0.668622 | 0.763418 | -6.40499 |
| GC        | 0.12401  | -0.36393 | 0.434479 | 0.668624 | 0.763418 | -6.405   |
| ZNF165    | -0.11253 | 0.231279 | -0.29782 | 0.769098 | 0.844998 | -6.40504 |
| FAM47E    | -0.1833  | 0.318425 | -0.43385 | 0.669071 | 0.763839 | -6.40527 |
| MIPOL1    | -0.09612 | 0.106496 | -0.40999 | 0.686429 | 0.777675 | -6.40534 |
| ZNF823    | -0.16666 | 0.325325 | -0.43359 | 0.669258 | 0.764009 | -6.40539 |
| SPTY2D1   | 0.113912 | 0.067569 | 0.409826 | 0.68655  | 0.777767 | -6.40541 |
| FOXF1     | 0.08768  | -0.29366 | 0.433294 | 0.669469 | 0.764161 | -6.40552 |
| ZNF354B   | -0.12952 | -0.25678 | -0.40873 | 0.687338 | 0.778524 | -6.40586 |
| PDCL2     | 0.089859 | 0.013652 | 0.379309 | 0.708929 | 0.796148 | -6.40588 |
| C19orf6   | -0.1384  | 0.262365 | -0.43237 | 0.670132 | 0.764872 | -6.40593 |
| OSBPL7    | -0.11496 | 0.421928 | -0.43226 | 0.670206 | 0.764912 | -6.40597 |
| LOC100306 | 0.106913 | -0.06041 | 0.37881  | 0.709294 | 0.796487 | -6.40607 |
| MTUS2     | 0.118459 | 0.071075 | 0.432032 | 0.670371 | 0.765056 | -6.40607 |
| NFE2      | -0.12866 | 0.193458 | -0.43191 | 0.670455 | 0.765107 | -6.40613 |
| GSPT2     | -0.13544 | 0.368854 | -0.43155 | 0.670718 | 0.765363 | -6.40629 |
| KANK4     | 0.092764 | -0.24697 | 0.288867 | 0.776424 | 0.850136 | -6.40634 |
| ZMIZ2     | -0.08606 | 0.470946 | -0.43085 | 0.671217 | 0.765799 | -6.40659 |
| SH2D1A    | 0.237678 | -0.44407 | 0.406919 | 0.688647 | 0.779458 | -6.40662 |
| GGTA1P    | -0.1739  | -0.22873 | -0.43027 | 0.671631 | 0.766166 | -6.40685 |

|           |          |          |          |          |          |          |
|-----------|----------|----------|----------|----------|----------|----------|
| ESAM      | 0.131492 | 0.150989 | 0.430235 | 0.671656 | 0.766166 | -6.40686 |
| MGC2327C  | -0.11909 | 0.234417 | -0.43008 | 0.671764 | 0.766216 | -6.40693 |
| INTS2     | 0.045677 | 0.027406 | 0.430064 | 0.671779 | 0.766216 | -6.40694 |
| GLUL      | -0.1305  | 0.116217 | -0.42985 | 0.671932 | 0.766327 | -6.40703 |
| KRT36     | 0.075927 | -0.27481 | 0.25846  | 0.799006 | 0.866178 | -6.40706 |
| MEP1A     | 0.078361 | -0.18349 | 0.405818 | 0.689442 | 0.780151 | -6.40708 |
| MTF2      | 0.131991 | -0.14807 | 0.405533 | 0.689648 | 0.780285 | -6.40719 |
| GLO1      | -0.13706 | 0.507333 | -0.25756 | 0.799691 | 0.866549 | -6.4073  |
| FAM168B   | -0.09201 | -0.05984 | -0.42918 | 0.672413 | 0.766709 | -6.40732 |
| PPP2R5C   | 0.116743 | -0.11861 | 0.429131 | 0.672446 | 0.766709 | -6.40734 |
| SYT4      | -0.0419  | 0.039266 | -0.42853 | 0.672874 | 0.766975 | -6.40761 |
| C11orf96  | 0.188451 | 0.114331 | 0.404222 | 0.690596 | 0.780996 | -6.40774 |
| EIF4B     | -0.0911  | 0.07676  | -0.42821 | 0.673104 | 0.767097 | -6.40775 |
| C6orf25   | 0.217737 | 0.718797 | 0.428115 | 0.673173 | 0.767097 | -6.40779 |
| C6orf165  | 0.057582 | 0.037921 | 0.428082 | 0.673197 | 0.767097 | -6.4078  |
| Sep-05    | -0.15611 | 0.700898 | -0.42807 | 0.673204 | 0.767097 | -6.40781 |
| USP9X     | 0.107036 | -0.16392 | 0.428055 | 0.673216 | 0.767097 | -6.40781 |
| SEC24B    | 0.162732 | -0.08405 | 0.427833 | 0.673375 | 0.767233 | -6.40791 |
| LAX1      | -0.14751 | 0.160154 | -0.4274  | 0.673686 | 0.767542 | -6.4081  |
| CCL28     | 0.055975 | -0.20175 | 0.254474 | 0.802036 | 0.868477 | -6.40811 |
| RACGAP1P  | 0.089267 | -0.08276 | 0.427344 | 0.673725 | 0.767543 | -6.40812 |
| RPL7      | -0.15847 | -0.66517 | -0.42704 | 0.673941 | 0.767744 | -6.40825 |
| UBE2U     | 0.11143  | 0.102398 | 0.402924 | 0.691534 | 0.781696 | -6.40827 |
| HIST1H3I  | -0.08776 | -0.02271 | -0.40282 | 0.691608 | 0.781734 | -6.40831 |
| LOC100501 | 0.152518 | 0.059019 | 0.425901 | 0.674759 | 0.768586 | -6.40875 |
| ZNF23     | 0.130455 | -0.08192 | 0.425687 | 0.674912 | 0.768646 | -6.40884 |
| DIAPH1    | -0.12047 | 0.379759 | -0.42568 | 0.674916 | 0.768646 | -6.40884 |
| CD83      | -0.13296 | 0.176867 | -0.42566 | 0.674929 | 0.768646 | -6.40885 |
| PCBP1     | -0.06278 | 0.274602 | -0.42525 | 0.675227 | 0.768941 | -6.40903 |
| USP29     | -0.07909 | 0.048417 | -0.2842  | 0.77935  | 0.852324 | -6.40909 |
| FAM73B    | -0.0673  | 0.233498 | -0.42508 | 0.675348 | 0.768959 | -6.40911 |
| ZNF385B   | -0.12762 | 0.037096 | -0.42506 | 0.675361 | 0.768959 | -6.40911 |
| PDIA4     | 0.084332 | 0.389555 | 0.424669 | 0.675642 | 0.769213 | -6.40928 |
| C2orf65   | -0.02517 | -0.00045 | -0.42464 | 0.675662 | 0.769213 | -6.4093  |
| G3BP1     | 0.109524 | 0.162241 | 0.42432  | 0.675893 | 0.769431 | -6.40943 |
| SPIN2B    | -0.13912 | 0.355003 | -0.42414 | 0.676021 | 0.76951  | -6.40951 |
| KIAA1967  | 0.078773 | 0.135373 | 0.424113 | 0.676041 | 0.76951  | -6.40952 |
| GEMIN8    | 0.112324 | 0.097499 | 0.423941 | 0.676164 | 0.769583 | -6.4096  |
| C12orf62  | 0.102938 | -0.20921 | 0.423836 | 0.676239 | 0.769602 | -6.40964 |
| LOC100129 | -0.13587 | 0.286295 | -0.42364 | 0.676378 | 0.769715 | -6.40973 |
| DRG2      | -0.06052 | 0.23734  | -0.42345 | 0.676515 | 0.769826 | -6.40981 |
| ZNF331    | -0.12539 | 0.235617 | -0.42333 | 0.676604 | 0.769883 | -6.40986 |
| FBXL8     | -0.07034 | 0.164541 | -0.42285 | 0.676948 | 0.770229 | -6.41007 |
| NPAS4     | -0.03553 | -0.02308 | -0.20032 | 0.843627 | 0.899642 | -6.41007 |
| WDR43     | 0.139873 | 0.089971 | 0.368253 | 0.717012 | 0.803083 | -6.4101  |
| PAPPA2    | 0.096354 | 0.037889 | 0.280516 | 0.782135 | 0.853844 | -6.41016 |
| PITPNA    | 0.127287 | 0.206193 | 0.422499 | 0.677199 | 0.770411 | -6.41022 |

|           |          |          |          |          |          |          |
|-----------|----------|----------|----------|----------|----------|----------|
| THOC6     | 0.089012 | 0.075807 | 0.422472 | 0.677218 | 0.770411 | -6.41023 |
| C1orf109  | 0.095378 | 0.005872 | 0.422268 | 0.677365 | 0.770411 | -6.41032 |
| SST       | -0.0823  | -0.18888 | -0.42224 | 0.677383 | 0.770411 | -6.41033 |
| HECTD2    | -0.12072 | 0.029657 | -0.42214 | 0.677459 | 0.770453 | -6.41037 |
| FGF22     | -0.11876 | 0.183574 | -0.42195 | 0.677593 | 0.77056  | -6.41045 |
| CCDC135   | -0.20681 | 0.528329 | -0.42114 | 0.678173 | 0.771175 | -6.4108  |
| SLC2A13   | 0.070548 | -0.10321 | 0.421064 | 0.678229 | 0.771181 | -6.41083 |
| STARD8    | 0.098801 | 0.206545 | 0.421026 | 0.678257 | 0.771181 | -6.41085 |
| TNFRSF13E | -0.10767 | 0.371886 | -0.27805 | 0.784    | 0.855138 | -6.41086 |
| PAQR5     | -0.09451 | -0.17089 | -0.3658  | 0.718813 | 0.804502 | -6.41103 |
| MGST2     | 0.106924 | -0.25091 | 0.420593 | 0.678567 | 0.771489 | -6.41104 |
| GPR174    | 0.055036 | -0.49326 | 0.194335 | 0.848235 | 0.902836 | -6.41128 |
| SAFB      | 0.070877 | 0.092174 | 0.419639 | 0.679253 | 0.772224 | -6.41144 |
| CCDC42B   | 0.057343 | 0.0439   | 0.419402 | 0.679423 | 0.772373 | -6.41155 |
| VMP1      | -0.15995 | 0.000107 | -0.41906 | 0.679668 | 0.772561 | -6.41169 |
| PRRC2B    | -0.10096 | 0.498641 | -0.4189  | 0.679785 | 0.77265  | -6.41176 |
| HSD17B7   | 0.157222 | -0.16287 | 0.41861  | 0.679992 | 0.772795 | -6.41188 |
| IGJ       | 0.197566 | 0.344148 | 0.418278 | 0.680231 | 0.773022 | -6.41202 |
| CDNF      | 0.123633 | 0.112304 | 0.418139 | 0.680331 | 0.773091 | -6.41208 |
| SCRG1     | 0.149721 | -0.08473 | 0.418007 | 0.680426 | 0.773112 | -6.41214 |
| SLC26A7   | 0.04158  | 0.024948 | 0.418003 | 0.680429 | 0.773112 | -6.41214 |
| WISP1     | 0.1022   | -0.19149 | 0.417901 | 0.680502 | 0.773151 | -6.41218 |
| LINC00052 | -0.16125 | -0.02919 | -0.41767 | 0.680669 | 0.773282 | -6.41228 |
| HRH3      | 0.062177 | -0.095   | 0.417631 | 0.680696 | 0.773282 | -6.4123  |
| RPA3      | -0.12862 | -0.07731 | -0.41751 | 0.680784 | 0.773337 | -6.41235 |
| PDE6C     | -0.07528 | -0.31832 | -0.27253 | 0.788178 | 0.858309 | -6.41242 |
| SYTL4     | 0.175851 | 0.235393 | 0.417314 | 0.680924 | 0.773415 | -6.41243 |
| LY6D      | -0.06484 | -0.18849 | -0.4173  | 0.680932 | 0.773415 | -6.41244 |
| IRGC      | -0.14257 | -0.38939 | -0.41717 | 0.681026 | 0.773477 | -6.41249 |
| PLAC2     | 0.0687   | 0.019586 | 0.417101 | 0.681078 | 0.773487 | -6.41253 |
| C18orf49  | -0.16678 | 0.528092 | -0.41705 | 0.681114 | 0.773487 | -6.41255 |
| MICA      | -0.22956 | 0.550071 | -0.39222 | 0.699289 | 0.788346 | -6.41261 |
| TACR3     | 0.076103 | -0.14546 | 0.361532 | 0.721942 | 0.806944 | -6.41262 |
| METTL10   | -0.07147 | -0.10769 | -0.23648 | 0.815751 | 0.878882 | -6.41264 |
| NFATC1    | -0.07972 | 0.33949  | -0.41668 | 0.681379 | 0.773685 | -6.4127  |
| CALN1     | -0.12169 | 0.135561 | -0.41643 | 0.681558 | 0.773812 | -6.41281 |
| TTY6      | -0.13096 | -0.04477 | -0.39165 | 0.699703 | 0.788518 | -6.41284 |
| MSLN      | 0.075291 | 0.026193 | 0.416328 | 0.681634 | 0.773853 | -6.41285 |
| DOK4      | -0.17197 | 1.020563 | -0.41597 | 0.681892 | 0.774102 | -6.41301 |
| CCNG1     | -0.11697 | -0.38773 | -0.41589 | 0.68195  | 0.774122 | -6.41304 |
| CREBL2    | 0.068776 | -0.05406 | 0.270082 | 0.79003  | 0.859514 | -6.4131  |
| LOC100287 | -0.01683 | -0.01028 | -0.23414 | 0.817537 | 0.8803   | -6.4132  |
| ADCYAP1   | -0.09415 | -0.05159 | -0.41533 | 0.682355 | 0.774537 | -6.41328 |
| FUT8      | -0.11524 | 0.202332 | -0.41512 | 0.682502 | 0.77466  | -6.41336 |
| C17orf46  | 0.069141 | -0.00332 | 0.414629 | 0.682857 | 0.775017 | -6.41357 |
| PALLD     | -0.14564 | -0.21202 | -0.41449 | 0.682958 | 0.775087 | -6.41363 |
| TAS2R42   | 0.083497 | -0.08471 | 0.414218 | 0.683153 | 0.775218 | -6.41374 |

|           |          |          |          |          |          |          |
|-----------|----------|----------|----------|----------|----------|----------|
| PCNT      | 0.11287  | 0.007635 | 0.414128 | 0.683217 | 0.775247 | -6.41378 |
| GARNL3    | 0.099683 | 0.030035 | 0.414036 | 0.683284 | 0.775278 | -6.41382 |
| WDR55     | -0.06537 | 0.198339 | -0.41388 | 0.683399 | 0.775297 | -6.41389 |
| POLR3K    | -0.06882 | -0.04038 | -0.41385 | 0.68342  | 0.775297 | -6.4139  |
| TRMU      | -0.0681  | 0.157426 | -0.41357 | 0.683618 | 0.775476 | -6.41402 |
| CDKL4     | 0.028698 | -0.02197 | 0.388644 | 0.701891 | 0.790303 | -6.41404 |
| DOK7      | -0.2565  | 0.518994 | -0.41329 | 0.68382  | 0.775661 | -6.41414 |
| NDST4     | -0.04493 | 0.022417 | -0.23005 | 0.820665 | 0.882359 | -6.41418 |
| XIRP2     | -0.17319 | 0.025002 | -0.41248 | 0.684403 | 0.776187 | -6.41447 |
| DEFB125   | -0.17546 | 0.189852 | -0.41242 | 0.68445  | 0.776196 | -6.4145  |
| RRAS2     | -0.13009 | -0.08253 | -0.41233 | 0.684516 | 0.776225 | -6.41454 |
| PTGS1     | 0.157199 | 0.203389 | 0.411741 | 0.684938 | 0.776612 | -6.41479 |
| MPDZ      | 0.138359 | -0.09054 | 0.411717 | 0.684955 | 0.776612 | -6.4148  |
| C1orf61   | 0.051186 | -0.48273 | 0.166904 | 0.869695 | 0.918443 | -6.4148  |
| SETBP1    | -0.08909 | 0.119457 | -0.41169 | 0.684976 | 0.776612 | -6.41481 |
| OR8D1     | -0.06693 | -0.09867 | -0.41156 | 0.685067 | 0.776671 | -6.41486 |
| NECAB2    | 0.214043 | 0.314873 | 0.411155 | 0.68536  | 0.776913 | -6.41503 |
| NOL6      | -0.0961  | 0.374786 | -0.41103 | 0.685453 | 0.776943 | -6.41509 |
| GIP       | 0.0759   | -0.20828 | 0.411009 | 0.685466 | 0.776943 | -6.41509 |
| SLC35G3   | -0.01848 | -0.01167 | -0.26229 | 0.795943 | 0.863646 | -6.41522 |
| SGPP1     | -0.11424 | -0.26429 | -0.41049 | 0.685839 | 0.777263 | -6.41531 |
| AFM       | 0.059929 | -0.04231 | 0.410453 | 0.685867 | 0.777263 | -6.41533 |
| LOC100506 | -0.06087 | 0.068996 | -0.22432 | 0.825057 | 0.885769 | -6.41552 |
| CECR1     | -0.12117 | 0.687104 | -0.40989 | 0.686276 | 0.777659 | -6.41556 |
| UBE2Z     | -0.17334 | 0.588268 | -0.40986 | 0.686296 | 0.777659 | -6.41557 |
| THAP10    | 0.093272 | -0.02237 | 0.409746 | 0.686377 | 0.777675 | -6.41562 |
| LOC55064  | 0.105422 | -0.03472 | 0.409692 | 0.686416 | 0.777675 | -6.41564 |
| ZFP106    | 0.131585 | -0.47195 | 0.409229 | 0.68675  | 0.777949 | -6.41584 |
| TBL1X     | -0.11991 | 0.421495 | -0.40849 | 0.687284 | 0.778509 | -6.41614 |
| GSTA1     | 0.107738 | -0.23891 | 0.408296 | 0.687424 | 0.778577 | -6.41622 |
| KLHDC8B   | 0.089367 | 0.480461 | 0.407995 | 0.687641 | 0.778778 | -6.41635 |
| MRPS21    | 0.096492 | -0.21685 | 0.40791  | 0.687702 | 0.778799 | -6.41639 |
| PABPC1L2  | 0.080505 | -0.16776 | 0.40786  | 0.687739 | 0.778799 | -6.41641 |
| C8orf12   | -0.0817  | -0.03551 | -0.35113 | 0.729595 | 0.813363 | -6.41641 |
| FNDC8     | 0.05772  | -0.2234  | 0.407751 | 0.687818 | 0.778843 | -6.41645 |
| NDUFA4L2  | 0.073688 | -0.0066  | 0.382394 | 0.706443 | 0.794105 | -6.4165  |
| CRYBB2P1  | -0.16059 | -0.03716 | -0.40763 | 0.687905 | 0.778897 | -6.4165  |
| TSSK6     | -0.09915 | 0.279973 | -0.40739 | 0.688081 | 0.779051 | -6.4166  |
| CHRNA9    | 0.111934 | 0.091835 | 0.407069 | 0.68831  | 0.779257 | -6.41673 |
| PROSER1   | -0.12957 | 0.074543 | -0.40702 | 0.688342 | 0.779257 | -6.41675 |
| CHN2      | -0.02797 | -0.00569 | -0.40668 | 0.688591 | 0.779448 | -6.4169  |
| FITM1     | -0.06714 | 0.305514 | -0.40656 | 0.688679 | 0.779458 | -6.41695 |
| EID3      | -0.1451  | 0.172888 | -0.38123 | 0.707291 | 0.79474  | -6.41695 |
| KRTAP4-4  | -0.10378 | -0.3259  | -0.38123 | 0.707291 | 0.79474  | -6.41695 |
| B3GNT1    | -0.10807 | 0.002201 | -0.38111 | 0.707376 | 0.794789 | -6.417   |
| SHMT2     | -0.08878 | 0.303192 | -0.40594 | 0.689124 | 0.779917 | -6.4172  |
| MAP4K3    | -0.07494 | -0.13674 | -0.21637 | 0.831152 | 0.890217 | -6.41731 |

|           |          |          |          |          |          |          |
|-----------|----------|----------|----------|----------|----------|----------|
| CBL       | 0.208083 | 0.366997 | 0.405626 | 0.689353 | 0.780131 | -6.41733 |
| LOC100506 | 0.11901  | 0.1684   | 0.348557 | 0.731496 | 0.815066 | -6.41733 |
| GLI3      | 0.010493 | -0.1943  | 0.039193 | 0.969226 | 0.988672 | -6.41738 |
| TRIM62    | -0.08062 | 0.039406 | -0.40544 | 0.689484 | 0.780151 | -6.41741 |
| WNT4      | -0.14111 | 0.059547 | -0.40544 | 0.689491 | 0.780151 | -6.41741 |
| MYO1B     | 0.24266  | 0.087735 | 0.404962 | 0.689833 | 0.780437 | -6.41761 |
| LPPR2     | -0.11684 | 0.431034 | -0.40492 | 0.689862 | 0.780437 | -6.41762 |
| MCM3AP    | 0.05141  | -0.00213 | 0.404781 | 0.689964 | 0.780455 | -6.41768 |
| SNHG8     | 0.173879 | -0.55946 | 0.404769 | 0.689973 | 0.780455 | -6.41769 |
| GLRA3     | 0.037855 | 0.022713 | 0.404735 | 0.689998 | 0.780455 | -6.4177  |
| CEACAM6   | 0.311676 | 0.064885 | 0.378957 | 0.708952 | 0.796148 | -6.41783 |
| NAB2      | 0.103316 | 0.172903 | 0.403982 | 0.690542 | 0.780098 | -6.41801 |
| ZNF709    | 0.003078 | -0.20132 | 0.016042 | 0.987401 | 1        | -6.41804 |
| FARP2     | -0.13132 | 0.41707  | -0.40379 | 0.690682 | 0.781048 | -6.41809 |
| LOC100134 | 0.090957 | -0.15461 | 0.251283 | 0.804312 | 0.870221 | -6.41811 |
| PCDHGA12  | -0.05723 | -0.02388 | -0.40357 | 0.690842 | 0.781177 | -6.41818 |
| IVD       | -0.08724 | 0.313267 | -0.40349 | 0.690897 | 0.781177 | -6.41821 |
| C18orf45  | -0.06793 | 0.027172 | -0.40347 | 0.690916 | 0.781177 | -6.41822 |
| SLC27A3   | 0.103964 | 0.088704 | 0.403116 | 0.691169 | 0.781418 | -6.41837 |
| MTHFR     | -0.13692 | 0.56528  | -0.40303 | 0.691228 | 0.781432 | -6.4184  |
| MYO1C     | -0.12901 | 0.675487 | -0.40299 | 0.69126  | 0.781432 | -6.41842 |
| CCDC117   | 0.119106 | 0.205297 | 0.402439 | 0.691659 | 0.781747 | -6.41864 |
| MCEE      | -0.10204 | -0.27399 | -0.40209 | 0.691914 | 0.781946 | -6.41879 |
| CYB5A     | -0.08843 | 0.168342 | -0.40155 | 0.692303 | 0.782294 | -6.41901 |
| MRPL17    | 0.106614 | -0.0879  | 0.401411 | 0.692403 | 0.782363 | -6.41906 |
| SLC26A3   | -0.12378 | -0.30896 | -0.37565 | 0.711367 | 0.798333 | -6.41911 |
| PHOSPHO2  | 0.036897 | 0.022138 | 0.400904 | 0.69277  | 0.782732 | -6.41927 |
| IFNW1     | 0.104161 | -0.02832 | 0.4008   | 0.692846 | 0.782772 | -6.41931 |
| OFCC1     | 0.065239 | 0.064053 | 0.246067 | 0.808288 | 0.873268 | -6.41944 |
| NAA50     | -0.08438 | -0.32037 | -0.40044 | 0.69311  | 0.783026 | -6.41946 |
| NAALAD2   | 0.036629 | 0.021977 | 0.399799 | 0.693571 | 0.783501 | -6.41972 |
| PPEF1     | -0.09151 | 0.137465 | -0.37372 | 0.71278  | 0.799623 | -6.41985 |
| SLC24A1   | 0.105984 | -0.11349 | 0.373341 | 0.713057 | 0.799888 | -6.41999 |
| RPS23     | 0.160975 | 0.205061 | 0.399066 | 0.694102 | 0.784056 | -6.42002 |
| Sep-08    | 0.061174 | -0.23815 | 0.399005 | 0.694147 | 0.784061 | -6.42005 |
| SMCR7     | -0.08236 | 0.099043 | -0.39881 | 0.694288 | 0.784176 | -6.42012 |
| LOC100165 | -0.06676 | 0.105962 | -0.24323 | 0.810449 | 0.874831 | -6.42015 |
| CPA5      | -0.1984  | 0.472668 | -0.39843 | 0.694567 | 0.784445 | -6.42028 |
| COG2      | -0.08372 | 0.095581 | -0.3982  | 0.694733 | 0.784543 | -6.42037 |
| LATS1     | 0.066085 | -0.06319 | 0.371936 | 0.714086 | 0.800721 | -6.42053 |
| TFDP3     | -0.10605 | 0.177584 | -0.2416  | 0.811695 | 0.875851 | -6.42055 |
| PIGL      | 0.094137 | -0.03099 | 0.397729 | 0.695072 | 0.784838 | -6.42056 |
| CHRM3     | 0.057337 | -0.03731 | 0.397725 | 0.695074 | 0.784838 | -6.42056 |
| GLI2      | 0.169507 | -0.22912 | 0.397273 | 0.695402 | 0.785074 | -6.42075 |
| CALB1     | 0.090815 | -0.32864 | 0.397271 | 0.695404 | 0.785074 | -6.42075 |
| JPH1      | -0.07159 | -0.0498  | -0.39712 | 0.695512 | 0.78515  | -6.42081 |
| SCGB2A2   | 0.059464 | 0.007179 | 0.199104 | 0.84443  | 0.900307 | -6.421   |



|           |          |          |          |          |          |          |
|-----------|----------|----------|----------|----------|----------|----------|
| PIGQ      | 0.073795 | 0.075131 | 0.396557 | 0.695922 | 0.785523 | -6.42104 |
| NXT1      | 0.1121   | -0.19569 | 0.39647  | 0.695985 | 0.785549 | -6.42107 |
| ZNF70     | -0.0593  | 0.079251 | -0.23929 | 0.81346  | 0.877163 | -6.42112 |
| SYNJ2BP   | 0.093613 | 0.041714 | 0.396313 | 0.696099 | 0.785633 | -6.42114 |
| KLK10     | 0.07274  | -0.15299 | 0.238864 | 0.813786 | 0.87737  | -6.42123 |
| ARID3B    | 0.062697 | 0.132951 | 0.395787 | 0.69648  | 0.786018 | -6.42135 |
| FAM83F    | 0.084948 | -0.19724 | 0.395689 | 0.696552 | 0.786053 | -6.42139 |
| WASL      | -0.11001 | 0.069844 | -0.36946 | 0.7159   | 0.802239 | -6.42146 |
| ABR       | -0.06589 | 0.185255 | -0.39546 | 0.696721 | 0.786198 | -6.42148 |
| PDZD2     | 0.0798   | -0.04964 | 0.395299 | 0.696835 | 0.786282 | -6.42154 |
| C12orf48  | 0.050992 | -0.07146 | 0.395238 | 0.69688  | 0.786287 | -6.42157 |
| BMP2K     | -0.08715 | 0.430334 | -0.39511 | 0.696969 | 0.786342 | -6.42162 |
| AICDA     | 0.180705 | 0.087708 | 0.368598 | 0.716531 | 0.802774 | -6.42179 |
| EFNA5     | 0.062537 | -0.34968 | 0.236194 | 0.815828 | 0.878894 | -6.42188 |
| DAPK2     | -0.12728 | 0.333211 | -0.39431 | 0.697555 | 0.786958 | -6.42194 |
| ZNF571    | 0.049621 | -0.25378 | 0.130603 | 0.897635 | 0.938942 | -6.42196 |
| IL17RC    | 0.101192 | 0.16106  | 0.394109 | 0.697699 | 0.787076 | -6.42202 |
| C19orf75  | -0.10729 | 0.096195 | -0.36696 | 0.717735 | 0.803713 | -6.42241 |
| HSD3B7    | -0.10823 | 0.174075 | -0.39304 | 0.698479 | 0.78791  | -6.42245 |
| LOC100130 | -0.10074 | -0.43233 | -0.29034 | 0.775094 | 0.849063 | -6.42253 |
| KCTD8     | -0.05348 | -0.01177 | -0.39271 | 0.698718 | 0.788134 | -6.42259 |
| S100A1    | -0.11458 | 0.292859 | -0.39251 | 0.698859 | 0.78822  | -6.42266 |
| PTPN6     | -0.07914 | 0.061224 | -0.39244 | 0.698913 | 0.78822  | -6.42269 |
| PPYR1     | 0.065359 | -0.25599 | 0.392437 | 0.698914 | 0.78822  | -6.42269 |
| TBC1D4    | 0.097316 | -0.09857 | 0.190198 | 0.851298 | 0.904869 | -6.42278 |
| RPL37     | -0.1435  | 0.514383 | -0.39212 | 0.699142 | 0.788346 | -6.42282 |
| LOC100121 | 0.055178 | 0.044743 | 0.365665 | 0.718683 | 0.804449 | -6.42289 |
| MYF5      | -0.12899 | -0.20164 | -0.39191 | 0.699296 | 0.788346 | -6.4229  |
| ZBTB16    | 0.152449 | 0.150071 | 0.391905 | 0.699301 | 0.788346 | -6.42291 |
| ARL4A     | 0.118058 | 0.096337 | 0.391896 | 0.699308 | 0.788346 | -6.42291 |
| UG0898H0  | -0.10178 | -0.00919 | -0.39181 | 0.69937  | 0.788371 | -6.42294 |
| ABTB2     | -0.14625 | 0.135323 | -0.39168 | 0.699463 | 0.788385 | -6.423   |
| SRD5A2    | -0.0418  | -0.18119 | -0.12211 | 0.904257 | 0.944105 | -6.42306 |
| FAM104B   | 0.101954 | 0.348285 | 0.391485 | 0.699606 | 0.788501 | -6.42307 |
| LETM2     | -0.09108 | 0.544676 | -0.39137 | 0.69969  | 0.788518 | -6.42312 |
| HOXB2     | -0.12729 | 0.391839 | -0.39099 | 0.69997  | 0.788774 | -6.42327 |
| ITM2A     | 0.190665 | -0.27027 | 0.390664 | 0.700204 | 0.788947 | -6.4234  |
| LOC100122 | -0.01276 | -0.0078  | -0.18664 | 0.85405  | 0.90676  | -6.42347 |
| SLC22A25  | -0.07869 | 0.082103 | -0.39048 | 0.700337 | 0.789052 | -6.42347 |
| ATXN2L    | -0.06418 | 0.299565 | -0.39003 | 0.700668 | 0.789334 | -6.42365 |
| C20orf27  | -0.10479 | 0.297901 | -0.38979 | 0.70084  | 0.789472 | -6.42375 |
| PBRM1     | -0.10476 | 0.107797 | -0.38973 | 0.700881 | 0.789472 | -6.42377 |
| HLA-F-AS1 | -0.09282 | 0.315042 | -0.38969 | 0.700911 | 0.789472 | -6.42379 |
| TARBP2    | 0.079572 | 0.145647 | 0.38954  | 0.701022 | 0.789551 | -6.42385 |
| CETN3     | 0.07937  | -0.0455  | 0.388809 | 0.701554 | 0.790105 | -6.42414 |
| PIP4K2B   | 0.076336 | 0.115876 | 0.388604 | 0.701703 | 0.790223 | -6.42422 |
| BTBD19    | -0.08017 | 0.021085 | -0.3885  | 0.701779 | 0.790223 | -6.42426 |

|           |          |          |          |          |          |          |
|-----------|----------|----------|----------|----------|----------|----------|
| MS4A5     | -0.09919 | -0.09492 | -0.3885  | 0.70178  | 0.790223 | -6.42426 |
| LOC100128 | -0.03912 | -0.00697 | -0.38822 | 0.701985 | 0.790363 | -6.42437 |
| RBL1      | -0.0645  | -0.02258 | -0.38802 | 0.702129 | 0.790471 | -6.42445 |
| SLC9B1    | -0.16769 | -0.08556 | -0.38797 | 0.702161 | 0.790471 | -6.42447 |
| RASL10B   | -0.10608 | 0.028707 | -0.38776 | 0.702317 | 0.790574 | -6.42455 |
| CCDC151   | 0.183983 | 0.315733 | 0.387737 | 0.702334 | 0.790574 | -6.42456 |
| EPB41L5   | -0.0931  | 0.224335 | -0.38734 | 0.70262  | 0.790851 | -6.42472 |
| UBAP2     | 0.106888 | 0.132081 | 0.386827 | 0.702997 | 0.79123  | -6.42492 |
| TNFSF11   | -0.05775 | -0.0956  | -0.28208 | 0.781318 | 0.8534   | -6.42496 |
| FAM107A   | -0.12103 | -0.08508 | -0.38671 | 0.703085 | 0.791283 | -6.42497 |
| FAT4      | -0.04093 | 0.056863 | -0.22303 | 0.825909 | 0.886295 | -6.42497 |
| YWHAQ     | 0.0829   | -0.23524 | 0.386559 | 0.703192 | 0.791359 | -6.42503 |
| ANKRD36   | -0.13808 | 0.029455 | -0.38646 | 0.703264 | 0.791394 | -6.42507 |
| ZNF233    | -0.05628 | 0.038411 | -0.17812 | 0.860634 | 0.911824 | -6.42507 |
| ZBTB49    | 0.033399 | 0.020039 | 0.385218 | 0.70417  | 0.792323 | -6.42555 |
| SORCS1    | -0.0847  | -0.16751 | -0.38508 | 0.704267 | 0.792386 | -6.42561 |
| NR0B2     | 0.093701 | -0.01688 | 0.384823 | 0.704457 | 0.79251  | -6.42571 |
| BARD1     | -0.07268 | -0.32509 | -0.38476 | 0.704506 | 0.792519 | -6.42574 |
| CD36      | -0.16296 | -0.25637 | -0.3845  | 0.704694 | 0.792684 | -6.42584 |
| FMN1      | -0.10985 | 0.228318 | -0.35762 | 0.724598 | 0.80922  | -6.42586 |
| C14orf34  | -0.03312 | -0.01987 | -0.38386 | 0.705157 | 0.79316  | -6.42608 |
| DPP8      | -0.05688 | -0.23331 | -0.3837  | 0.705277 | 0.793249 | -6.42615 |
| LOC10028  | 0.094421 | 0.147511 | 0.383407 | 0.70549  | 0.793444 | -6.42626 |
| LOC25739  | -0.11166 | 0.103892 | -0.38319 | 0.70565  | 0.793578 | -6.42635 |
| OTUD6B    | -0.14989 | 0.458368 | -0.38293 | 0.705837 | 0.793743 | -6.42645 |
| PEMT      | -0.08346 | 0.303324 | -0.38282 | 0.705921 | 0.793792 | -6.42649 |
| CALD1     | -0.19705 | 0.521538 | -0.38272 | 0.705994 | 0.793828 | -6.42653 |
| SERPINA5  | -0.03571 | 0.101797 | -0.16968 | 0.867167 | 0.916466 | -6.42657 |
| ASH1L     | 0.090487 | -0.19261 | 0.382322 | 0.706282 | 0.794105 | -6.42669 |
| TEX28     | 0.060281 | 0.053708 | 0.215392 | 0.831773 | 0.890691 | -6.42669 |
| SEMA4G    | 0.073107 | -0.08815 | 0.382252 | 0.706333 | 0.794105 | -6.42671 |
| LOC10050  | -0.14277 | 0.162905 | -0.38217 | 0.706392 | 0.794105 | -6.42675 |
| PNPLA4    | 0.120976 | -0.03419 | 0.382119 | 0.70643  | 0.794105 | -6.42677 |
| VCX3A     | 0.23046  | 0.217059 | 0.381898 | 0.706591 | 0.794226 | -6.42685 |
| PPM1K     | 0.101016 | 0.204905 | 0.381134 | 0.70715  | 0.794672 | -6.42715 |
| FRMPD1    | -0.16382 | 0.076238 | -0.35375 | 0.727445 | 0.811614 | -6.42727 |
| CREG2     | 0.037286 | -0.02206 | 0.212739 | 0.833812 | 0.892284 | -6.42727 |
| POTEG     | 0.025613 | -0.78447 | 0.061456 | 0.951815 | 0.976756 | -6.42731 |
| KIAA1598  | 0.030395 | -0.33138 | 0.081101 | 0.936317 | 0.966444 | -6.42736 |
| DDX11L2   | 0.156988 | 0.405198 | 0.380354 | 0.707719 | 0.795129 | -6.42745 |
| NCAM2     | -0.06924 | -0.05837 | -0.38014 | 0.707873 | 0.795256 | -6.42753 |
| SLC27A2   | -0.15518 | 0.21422  | -0.37965 | 0.708237 | 0.795573 | -6.42773 |
| GNB5      | -0.08009 | 0.247441 | -0.16288 | 0.872437 | 0.920596 | -6.42774 |
| KRT33B    | 0.015354 | -0.12659 | 0.076364 | 0.940028 | 0.96884  | -6.42775 |
| TIMM13    | 0.095279 | 0.103302 | 0.379549 | 0.708307 | 0.795607 | -6.42776 |
| LOC20026  | 0.089786 | -0.10686 | 0.379271 | 0.708511 | 0.79579  | -6.42787 |
| ATAD3B    | 0.076622 | 0.40922  | 0.37902  | 0.708694 | 0.795951 | -6.42797 |

|           |           |          |          |          |          |          |
|-----------|-----------|----------|----------|----------|----------|----------|
| SP7       | -0.03854  | -0.25822 | -0.16086 | 0.874011 | 0.92176  | -6.42807 |
| ZNF595    | -0.0187   | -0.16609 | -0.07026 | 0.944816 | 0.972136 | -6.42821 |
| LOC100507 | -0.12835  | 0.09503  | -0.37807 | 0.70939  | 0.796549 | -6.42834 |
| MINPP1    | -0.07217  | -0.00011 | -0.20721 | 0.838067 | 0.895218 | -6.42846 |
| CD7       | 0.122136  | 0.302045 | 0.377521 | 0.70979  | 0.796953 | -6.42855 |
| RPA2      | 0.065764  | -0.12042 | 0.377443 | 0.709847 | 0.796971 | -6.42858 |
| YWHAB     | -0.0522   | 0.004813 | -0.3772  | 0.710027 | 0.797128 | -6.42867 |
| NUCKS1    | 0.117914  | 0.02939  | 0.376949 | 0.710208 | 0.797285 | -6.42877 |
| CELSR2    | 0.121358  | 0.307558 | 0.376866 | 0.710269 | 0.797308 | -6.4288  |
| MOCS1     | -0.08305  | 0.13784  | -0.20535 | 0.839501 | 0.896364 | -6.42885 |
| LOC144486 | -0.06815  | 0.043335 | -0.37664 | 0.710431 | 0.797444 | -6.42888 |
| OAS2      | -0.25165  | 0.893792 | -0.37546 | 0.711299 | 0.798333 | -6.42934 |
| C16orf79  | 0.067391  | 0.057358 | 0.375397 | 0.711344 | 0.798333 | -6.42936 |
| NELL1     | 0.14919   | 0.251555 | 0.37534  | 0.711386 | 0.798333 | -6.42938 |
| LOC84856  | 0.099941  | -0.06758 | 0.347691 | 0.731922 | 0.815448 | -6.42944 |
| PIK3R2    | 0.118816  | 0.317937 | 0.374775 | 0.711799 | 0.798751 | -6.4296  |
| TMEM35    | -0.0951   | -0.16459 | -0.37465 | 0.711888 | 0.798801 | -6.42965 |
| DUOX2     | -0.07285  | -0.01271 | -0.3746  | 0.711925 | 0.798801 | -6.42967 |
| CAPS2     | -0.00998  | -0.0061  | -0.15015 | 0.882329 | 0.928035 | -6.42979 |
| AKR1C4    | 0.071008  | 0.110698 | 0.346645 | 0.732695 | 0.816169 | -6.42981 |
| KCND2     | 0.09636   | -0.03656 | 0.37393  | 0.712417 | 0.799307 | -6.42992 |
| C17orf67  | 0.020845  | -0.00439 | 0.346258 | 0.732981 | 0.816349 | -6.42995 |
| TSKU      | 0.061498  | -0.15371 | 0.373671 | 0.712607 | 0.799475 | -6.43002 |
| CCDC99    | -0.07507  | -0.02156 | -0.37285 | 0.713207 | 0.800011 | -6.43033 |
| NCKAP1    | 0.056968  | 0.01606  | 0.198045 | 0.845128 | 0.900841 | -6.43036 |
| MDGA1     | -0.09425  | 0.122698 | -0.37275 | 0.713282 | 0.800022 | -6.43037 |
| YEATS2    | -0.06762  | 0.093243 | -0.37273 | 0.713299 | 0.800022 | -6.43038 |
| PIGA      | -0.08754  | -0.39882 | -0.37252 | 0.713449 | 0.800145 | -6.43046 |
| VAMP8     | 0.097055  | 0.10079  | 0.372254 | 0.713646 | 0.800319 | -6.43056 |
| C16orf82  | -0.00484  | -0.5477  | -0.01822 | 0.985678 | 0.999812 | -6.43059 |
| FAM19A2   | -0.00607  | -0.31968 | -0.01554 | 0.987785 | 1        | -6.43063 |
| ZNF764    | 0.071827  | -0.04046 | 0.372004 | 0.713829 | 0.800479 | -6.43066 |
| POLR2M    | -9.74E-05 | -0.24312 | -0.00021 | 0.999832 | 1        | -6.43076 |
| PGBD1     | 0         | 0        | 0        | 1        | 1        | -6.43076 |
| LRRC10B   | 0         | 0        | 0        | 1        | 1        | -6.43076 |
| OR2J2     | 0.091183  | -0.08104 | 0.37147  | 0.71422  | 0.800826 | -6.43086 |
| QKI       | 0.092124  | -0.06145 | 0.37118  | 0.714432 | 0.800985 | -6.43097 |
| TTC28-AS1 | 0.089424  | 0.018068 | 0.371165 | 0.714444 | 0.800985 | -6.43097 |
| CYP4F2    | -0.14117  | 0.221973 | -0.37081 | 0.714701 | 0.801228 | -6.43111 |
| MDM2      | -0.10355  | 0.131578 | -0.37046 | 0.714958 | 0.801423 | -6.43124 |
| TUSC2     | -0.05683  | -0.07285 | -0.3704  | 0.715003 | 0.801428 | -6.43126 |
| WDR47     | 0.03056   | 0.018336 | 0.370233 | 0.715127 | 0.801521 | -6.43133 |
| TCHH      | 0.062528  | -0.14074 | 0.369972 | 0.715319 | 0.80169  | -6.43142 |
| DCLRE1B   | 0.081429  | -0.01952 | 0.3693   | 0.715811 | 0.802197 | -6.43168 |
| KLK12     | -0.06555  | -0.44224 | -0.19146 | 0.850213 | 0.904057 | -6.43168 |
| QSER1     | 0.078443  | 0.023116 | 0.369137 | 0.715931 | 0.802239 | -6.43174 |
| GTSF1     | 0.101216  | 0.391025 | 0.341017 | 0.736859 | 0.81969  | -6.43179 |

|           |          |          |          |          |          |          |
|-----------|----------|----------|----------|----------|----------|----------|
| NEFM      | -0.04299 | -0.13934 | -0.36862 | 0.716311 | 0.802619 | -6.43193 |
| FAM71B    | -0.05452 | -0.17068 | -0.19005 | 0.851299 | 0.904869 | -6.43195 |
| ABCG1     | -0.10565 | 0.325521 | -0.36845 | 0.716432 | 0.802708 | -6.432   |
| KIAA1211  | -0.07734 | 0.324969 | -0.36805 | 0.716732 | 0.80295  | -6.43215 |
| RBAK-LOC3 | 0.075126 | -0.07832 | 0.36796  | 0.716795 | 0.80295  | -6.43218 |
| AMBP      | -0.0651  | -0.08561 | -0.36794 | 0.716811 | 0.80295  | -6.43219 |
| MOXD1     | 0.112381 | 0.049353 | 0.367083 | 0.717438 | 0.803514 | -6.43251 |
| GNG2      | -0.10041 | 0.093771 | -0.36674 | 0.717688 | 0.803713 | -6.43264 |
| KIAA1244  | -0.02131 | 0.004263 | -0.36662 | 0.717777 | 0.803713 | -6.43268 |
| ZNF568    | -0.15363 | 0.047306 | -0.36656 | 0.717821 | 0.803713 | -6.43271 |
| WDR65     | 0.029806 | 0.017884 | 0.365866 | 0.718332 | 0.804201 | -6.43297 |
| AAGAB     | 0.039932 | -0.194   | 0.365857 | 0.718339 | 0.804201 | -6.43297 |
| FAM69A    | -0.04223 | 0.242232 | -0.1278  | 0.899733 | 0.940584 | -6.43298 |
| LACTB2    | -0.14487 | 0.115594 | -0.36528 | 0.718759 | 0.804488 | -6.43318 |
| SOSTDC1   | 0.099319 | -0.02339 | 0.336822 | 0.739969 | 0.822076 | -6.43325 |
| CHIA      | 0.093474 | -0.07179 | 0.36493  | 0.71902  | 0.804688 | -6.43331 |
| GPRASP1   | 0.078833 | 0.17038  | 0.182854 | 0.856863 | 0.908828 | -6.43333 |
| SIRPG     | -0.18083 | 0.531053 | -0.36469 | 0.719198 | 0.804749 | -6.4334  |
| ZNF606    | 0.030923 | -0.09859 | 0.181886 | 0.857612 | 0.909395 | -6.43351 |
| SYP       | -0.09258 | 0.065896 | -0.3644  | 0.719412 | 0.804916 | -6.43351 |
| RRP1      | -0.11594 | 0.47009  | -0.36434 | 0.719454 | 0.804916 | -6.43353 |
| PUM1      | -0.0823  | 0.390723 | -0.36432 | 0.71947  | 0.804916 | -6.43354 |
| OPALIN    | 0.071935 | -0.31524 | 0.181653 | 0.857793 | 0.909452 | -6.43355 |
| PAK3      | -0.07907 | -0.24781 | -0.36406 | 0.719656 | 0.805078 | -6.43364 |
| CXCR5     | 0.135775 | 0.5338   | 0.363993 | 0.719709 | 0.805091 | -6.43366 |
| C12orf47  | 0.104419 | -0.03822 | 0.36389  | 0.719784 | 0.805126 | -6.4337  |
| LOC15381  | 0.141503 | 0.036741 | 0.363839 | 0.719822 | 0.805126 | -6.43372 |
| SH2D3A    | 0.084479 | 0.086476 | 0.363762 | 0.719879 | 0.805143 | -6.43375 |
| CDKL1     | 0.094031 | -0.16521 | 0.363517 | 0.720058 | 0.805298 | -6.43384 |
| FUT10     | 0.137089 | -0.35983 | 0.363143 | 0.720333 | 0.805552 | -6.43398 |
| PDE6B     | -0.12657 | 0.198767 | -0.3631  | 0.720367 | 0.805552 | -6.43399 |
| TPSD1     | -0.08697 | -0.03314 | -0.363   | 0.720442 | 0.80559  | -6.43403 |
| TUB       | 0.027142 | -0.27885 | 0.119201 | 0.906446 | 0.945584 | -6.43407 |
| INHBA     | -0.02109 | 0.004217 | -0.36289 | 0.720523 | 0.805634 | -6.43407 |
| IGKV1D-8  | -0.11642 | -0.06976 | -0.36283 | 0.720567 | 0.805637 | -6.4341  |
| MKKS      | -0.09235 | -0.21888 | -0.36234 | 0.720921 | 0.805957 | -6.43427 |
| PRPF19    | 0.068382 | 0.040633 | 0.362325 | 0.720935 | 0.805957 | -6.43428 |
| SLC25A21  | -0.04127 | -0.12904 | -0.17763 | 0.860907 | 0.912014 | -6.4343  |
| KLHL35    | 0.169882 | 0.392367 | 0.361999 | 0.721175 | 0.806179 | -6.4344  |
| THAP9     | -0.11628 | -0.62698 | -0.2962  | 0.77049  | 0.84577  | -6.43464 |
| SLAMF1    | 0.09242  | -0.04169 | 0.360977 | 0.721927 | 0.806944 | -6.43478 |
| APITD1    | -0.03866 | 0.105548 | -0.11262 | 0.91159  | 0.949232 | -6.43486 |
| ASB14     | -0.06222 | 0.112529 | -0.17415 | 0.863607 | 0.913886 | -6.43492 |
| CCDC28B   | 0.095802 | 0.148524 | 0.360573 | 0.722224 | 0.807214 | -6.43493 |
| WDR49     | 0.094039 | -0.00597 | 0.360398 | 0.722353 | 0.807287 | -6.43499 |
| LOC341056 | 0.146281 | 0.292136 | 0.360372 | 0.722372 | 0.807287 | -6.435   |
| UTP15     | 0.024924 | -0.14794 | 0.110355 | 0.913358 | 0.950461 | -6.43512 |

|           |          |          |          |          |          |          |
|-----------|----------|----------|----------|----------|----------|----------|
| HOXB8     | 0.100654 | -0.16385 | 0.331341 | 0.744039 | 0.825427 | -6.43512 |
| URM1      | 0.050847 | 0.217273 | 0.359994 | 0.722651 | 0.807552 | -6.43514 |
| MOGS      | -0.05856 | 0.439384 | -0.35942 | 0.723073 | 0.807907 | -6.43535 |
| PPARD     | -0.05803 | 0.130861 | -0.35939 | 0.723092 | 0.807907 | -6.43536 |
| TMEM222   | -0.05672 | 0.119272 | -0.35905 | 0.723346 | 0.808099 | -6.43549 |
| NT5E      | -0.11115 | 0.035846 | -0.35899 | 0.723388 | 0.808099 | -6.43551 |
| CDC14C    | 0.067649 | 0.068504 | 0.358895 | 0.72346  | 0.808134 | -6.43554 |
| TNFAIP8   | 0.090555 | -0.64455 | 0.3583   | 0.723899 | 0.808567 | -6.43576 |
| CD9       | 0.124086 | 0.210311 | 0.358256 | 0.723931 | 0.808567 | -6.43578 |
| BEND6     | 0.148891 | 0.186562 | 0.358133 | 0.724022 | 0.808623 | -6.43582 |
| SUMO1P3   | 0.148413 | 0.440392 | 0.357151 | 0.724745 | 0.809338 | -6.43618 |
| C9orf117  | 0.025015 | -0.20652 | 0.099843 | 0.921581 | 0.955826 | -6.43625 |
| MED14     | -0.06442 | 0.035695 | -0.35689 | 0.724934 | 0.809504 | -6.43627 |
| RASSF10   | 0.064109 | -0.02188 | 0.35672  | 0.725062 | 0.809567 | -6.43634 |
| KCNA2     | -0.08629 | -0.02428 | -0.35667 | 0.725098 | 0.809567 | -6.43635 |
| GNL1      | 0.063711 | 0.153903 | 0.356649 | 0.725115 | 0.809567 | -6.43636 |
| LOC100506 | 0.032902 | -0.21588 | 0.098529 | 0.922609 | 0.956538 | -6.43639 |
| BTLA      | -0.11813 | -0.02356 | -0.35637 | 0.725317 | 0.809747 | -6.43646 |
| MAMSTR    | 0.046699 | -0.1054  | 0.356137 | 0.725493 | 0.809896 | -6.43655 |
| KLF5      | -0.1353  | 0.428915 | -0.35607 | 0.725539 | 0.809902 | -6.43657 |
| UPRT      | -0.10696 | 0.194393 | -0.35569 | 0.725821 | 0.810126 | -6.43671 |
| CCBL1     | -0.05912 | 0.202102 | -0.35569 | 0.725822 | 0.810126 | -6.43671 |
| CUX2      | -0.14288 | 0.349224 | -0.32584 | 0.748135 | 0.828893 | -6.43697 |
| FLJ21408  | 0.057995 | -0.07086 | 0.354852 | 0.72644  | 0.81077  | -6.43701 |
| NRXN3     | 0.025781 | -0.26361 | 0.091216 | 0.928336 | 0.960886 | -6.4371  |
| ZNF358    | 0.094757 | 0.582902 | 0.354092 | 0.727    | 0.811323 | -6.43729 |
| HPX       | 0.051389 | 0.008953 | 0.354026 | 0.727049 | 0.811323 | -6.43731 |
| CYTH1     | 0.059865 | 0.105683 | 0.353985 | 0.72708  | 0.811323 | -6.43733 |
| CAPS      | -0.09892 | 0.432177 | -0.35396 | 0.727102 | 0.811323 | -6.43734 |
| RFX6      | -0.08834 | 0.138436 | -0.32453 | 0.749111 | 0.829471 | -6.43741 |
| FHDC1     | 0.149986 | 0.21875  | 0.353595 | 0.727367 | 0.811573 | -6.43747 |
| AMZ2      | -0.09311 | -0.19914 | -0.35313 | 0.727708 | 0.811815 | -6.43764 |
| VTN       | 0.066476 | -0.15248 | 0.352933 | 0.727856 | 0.811933 | -6.43771 |
| LOC100507 | 0.008723 | -0.00303 | 0.084302 | 0.933754 | 0.964927 | -6.43773 |
| ADAMTS15  | -0.05687 | 0.20882  | -0.35279 | 0.727962 | 0.812006 | -6.43776 |
| OR1E1     | 0.055976 | -0.12271 | 0.352706 | 0.728024 | 0.812025 | -6.43779 |
| PIGX      | -0.1452  | 0.054083 | -0.35191 | 0.728611 | 0.812591 | -6.43808 |
| CXCL6     | 0.120543 | -0.30914 | 0.322499 | 0.750621 | 0.830586 | -6.43808 |
| RIC3      | 0.08304  | 0.144938 | 0.351714 | 0.728756 | 0.812706 | -6.43815 |
| LOC400756 | -0.05708 | -0.1303  | -0.35161 | 0.728834 | 0.812746 | -6.43818 |
| NMU       | -0.07842 | -0.09303 | -0.35154 | 0.728882 | 0.812753 | -6.43821 |
| ZDHHC23   | -0.10725 | 0.044175 | -0.35147 | 0.728938 | 0.812771 | -6.43823 |
| SETD1A    | -0.09033 | 0.677561 | -0.35063 | 0.729559 | 0.813363 | -6.43854 |
| SEPT7L    | 0.054072 | -0.43243 | 0.14498  | 0.886553 | 0.931128 | -6.43859 |
| SPRY2     | 0.072977 | 0.152296 | 0.320254 | 0.752296 | 0.831772 | -6.43882 |
| STK11     | -0.07637 | 0.425186 | -0.34975 | 0.730204 | 0.813981 | -6.43885 |
| LINC00158 | 0.05243  | -0.36659 | 0.150565 | 0.881917 | 0.927715 | -6.43885 |

|           |          |          |          |          |          |          |
|-----------|----------|----------|----------|----------|----------|----------|
| IL16      | 0.0522   | -0.02088 | 0.349716 | 0.730232 | 0.813981 | -6.43886 |
| SLIT2-IT1 | -0.04454 | 0.017702 | -0.31988 | 0.752575 | 0.831976 | -6.43894 |
| DCHS2     | -0.12809 | 0.025238 | -0.3494  | 0.730466 | 0.814149 | -6.43897 |
| DUS3L     | 0.075703 | 0.128673 | 0.348939 | 0.730806 | 0.814482 | -6.43914 |
| SAMD5     | 0.055054 | -0.00103 | 0.348723 | 0.730966 | 0.814615 | -6.43922 |
| WT1       | -0.05896 | -0.09268 | -0.28065 | 0.782204 | 0.853844 | -6.43925 |
| ABCB7     | -0.06208 | 0.003413 | -0.34847 | 0.731152 | 0.814775 | -6.4393  |
| LOC100130 | 0.085387 | 0.212712 | 0.1468   | 0.884847 | 0.929958 | -6.43943 |
| HLA-DQA2  | 0.07053  | -0.00385 | 0.348124 | 0.731409 | 0.815015 | -6.43943 |
| BEX1      | 0.174773 | 0.161421 | 0.34751  | 0.731863 | 0.815428 | -6.43965 |
| LOC100128 | 0.079068 | 0.047441 | 0.346505 | 0.732607 | 0.816118 | -6.44    |
| LOC100507 | -0.06704 | -0.03841 | -0.31635 | 0.75521  | 0.834419 | -6.44009 |
| PTPRT     | 0.061725 | -0.0593  | 0.346177 | 0.732849 | 0.816295 | -6.44012 |
| HOTTIP    | -0.01372 | -0.42618 | -0.04937 | 0.961173 | 0.98297  | -6.44013 |
| LOC100129 | -0.10107 | 0.172427 | -0.34608 | 0.732918 | 0.816325 | -6.44015 |
| CXorf27   | 0.036137 | -0.11496 | 0.141142 | 0.889254 | 0.933291 | -6.44026 |
| DKFZP564C | -0.13545 | 0.235098 | -0.34536 | 0.733457 | 0.816833 | -6.44041 |
| IGSF1     | 0.056986 | -0.38643 | 0.139151 | 0.890806 | 0.934443 | -6.44055 |
| PIGP      | 0.108454 | 0.045987 | 0.344668 | 0.733966 | 0.817342 | -6.44065 |
| TUBGCP4   | 0.045907 | -0.04917 | 0.138361 | 0.891421 | 0.934888 | -6.44066 |
| ATAD5     | -0.1256  | 0.217682 | -0.34463 | 0.733997 | 0.817342 | -6.44067 |
| C3orf37   | -0.06659 | 0.264956 | -0.3445  | 0.73409  | 0.817399 | -6.44071 |
| ISYNA1    | 0.065523 | 0.333742 | 0.344392 | 0.73417  | 0.817407 | -6.44075 |
| ITFG2     | -0.08617 | 0.279544 | -0.34438 | 0.734181 | 0.817407 | -6.44075 |
| PMP22     | -0.25623 | 0.208473 | -0.34406 | 0.734415 | 0.81762  | -6.44086 |
| GALNTL2   | 0.056476 | -0.59698 | 0.274556 | 0.786807 | 0.857341 | -6.44099 |
| LOC100133 | -0.01389 | 0.604497 | -0.02732 | 0.978505 | 0.994974 | -6.441   |
| LSM7      | 0.082166 | -0.16638 | 0.343435 | 0.73488  | 0.817999 | -6.44108 |
| RASEF     | -0.17089 | 0.394274 | -0.34321 | 0.735043 | 0.818122 | -6.44116 |
| MARCO     | -0.1382  | 0.071992 | -0.34317 | 0.735074 | 0.818122 | -6.44118 |
| VPS13C    | 0        | 0        | 0        | 1        | 1        | -6.44138 |
| SUPT3H    | 0        | 0        | 0        | 1        | 1        | -6.44138 |
| SLITRK1   | 0        | 0        | 0        | 1        | 1        | -6.44138 |
| FERMT1    | 0.032296 | -0.49367 | 0.124024 | 0.902854 | 0.942979 | -6.44151 |
| HLA-DPB1  | -0.38557 | -0.39568 | -0.3421  | 0.735867 | 0.818958 | -6.44155 |
| SPRYD4    | -0.10974 | -0.08187 | -0.34201 | 0.735938 | 0.818991 | -6.44158 |
| LRRTM1    | -0.04322 | -0.1229  | -0.31162 | 0.758749 | 0.837464 | -6.44161 |
| BLVRA     | -0.08959 | 0.262955 | -0.34192 | 0.736004 | 0.819018 | -6.44161 |
| TRAT1     | -0.16003 | -0.26546 | -0.3115  | 0.758838 | 0.837464 | -6.44165 |
| PAK2      | -0.13268 | 0.161072 | -0.34111 | 0.7366   | 0.819564 | -6.44189 |
| MRPL9     | 0.073632 | -0.04917 | 0.341085 | 0.736621 | 0.819564 | -6.4419  |
| GAS2      | -0.11741 | 0.350336 | -0.34109 | 0.736621 | 0.819564 | -6.4419  |
| OK/SW-CL  | 0.056024 | -0.18143 | 0.310513 | 0.759576 | 0.837926 | -6.44196 |
| LOC100506 | 0.071785 | -0.08573 | 0.271028 | 0.789476 | 0.859293 | -6.44197 |
| RNF125    | -0.0734  | 0.081521 | -0.34077 | 0.736854 | 0.81969  | -6.44201 |
| ZFYVE19   | 0.041126 | 0.096719 | 0.340767 | 0.736856 | 0.81969  | -6.44202 |
| EYA4      | 0.084319 | -0.02284 | 0.34066  | 0.736936 | 0.819728 | -6.44205 |

|          |          |          |          |          |          |          |
|----------|----------|----------|----------|----------|----------|----------|
| VEGFC    | 0.115297 | 0.322016 | 0.270741 | 0.789694 | 0.859387 | -6.44205 |
| BROX     | -0.12562 | 0.410019 | -0.3401  | 0.737353 | 0.8201   | -6.44225 |
| SH3YL1   | -0.05484 | 0.02579  | -0.33962 | 0.737706 | 0.820446 | -6.44241 |
| GPC1     | -0.06599 | -0.14829 | -0.33947 | 0.73782  | 0.820526 | -6.44247 |
| ZNF773   | -0.07693 | 0.156784 | -0.33936 | 0.737903 | 0.820572 | -6.44251 |
| ENOSF1   | -0.09928 | 0.162713 | -0.33871 | 0.738385 | 0.821061 | -6.44273 |
| R3HCC1   | -0.05267 | 0.071609 | -0.33864 | 0.738434 | 0.821069 | -6.44275 |
| PALM2    | -0.11126 | 0.059401 | -0.33851 | 0.738528 | 0.821127 | -6.4428  |
| TMC8     | 0.073036 | 0.141198 | 0.338058 | 0.738866 | 0.821456 | -6.44295 |
| AZGP1    | -0.03294 | -0.17409 | -0.12082 | 0.905114 | 0.944737 | -6.44299 |
| FUNDC2   | -0.04526 | -0.02905 | -0.33772 | 0.739115 | 0.821599 | -6.44307 |
| MARS2    | 0.045257 | 0.019614 | 0.337716 | 0.73912  | 0.821599 | -6.44307 |
| OR1D2    | -0.07235 | -0.1902  | -0.3375  | 0.739283 | 0.821733 | -6.44315 |
| LOC64378 | -0.14284 | -0.01741 | -0.30666 | 0.762464 | 0.840332 | -6.44318 |
| ARF3     | 0.057942 | 0.512991 | 0.337349 | 0.739393 | 0.821762 | -6.4432  |
| CIB3     | -0.07306 | -0.17871 | -0.33722 | 0.739486 | 0.821812 | -6.44324 |
| LOC10050 | -0.08602 | 0.15674  | -0.33717 | 0.739522 | 0.821812 | -6.44326 |
| SMG6     | 0.063334 | 0.157936 | 0.33709  | 0.739584 | 0.821835 | -6.44329 |
| VAT1     | -0.08662 | 0.121059 | -0.33691 | 0.73972  | 0.821939 | -6.44335 |
| LOC10050 | -0.04347 | -0.1298  | -0.11768 | 0.907563 | 0.946296 | -6.44338 |
| FNDC5    | -0.08183 | -0.02025 | -0.3368  | 0.739803 | 0.821962 | -6.44339 |
| FLJ35700 | 0.01949  | -0.0039  | 0.336767 | 0.739825 | 0.821962 | -6.4434  |
| LRRC3C   | -0.05636 | -0.15149 | -0.26582 | 0.79342  | 0.862092 | -6.44341 |
| APOL4    | 0.142958 | -0.21178 | 0.26571  | 0.793505 | 0.862098 | -6.44344 |
| TERF2    | 0.049897 | 0.034423 | 0.336463 | 0.74005  | 0.822119 | -6.4435  |
| SIX6     | 0.043996 | -0.12581 | 0.336282 | 0.740184 | 0.822222 | -6.44357 |
| MPZL2    | 0.081291 | 0.150525 | 0.336194 | 0.74025  | 0.822243 | -6.4436  |
| RPL9     | 0.213358 | -1.0786  | 0.336143 | 0.740288 | 0.822243 | -6.44361 |
| KCNB2    | -0.05392 | -0.03038 | -0.33602 | 0.740383 | 0.822302 | -6.44366 |
| TFE3     | -0.05879 | 0.31232  | -0.33575 | 0.740577 | 0.822471 | -6.44375 |
| GJD4     | -0.06255 | 0.068413 | -0.33556 | 0.740722 | 0.822586 | -6.44381 |
| IFI27L2  | 0.095541 | -0.20624 | 0.335364 | 0.740866 | 0.8227   | -6.44388 |
| POLG     | 0.039229 | 0.123973 | 0.335096 | 0.741065 | 0.822874 | -6.44397 |
| PAPLN    | 0.106681 | -0.21794 | 0.334903 | 0.741209 | 0.822944 | -6.44404 |
| CES1P1   | 0.022814 | -0.02734 | 0.263503 | 0.795178 | 0.863294 | -6.44404 |
| MYL9     | -0.19256 | 1.019264 | -0.33489 | 0.741218 | 0.822944 | -6.44404 |
| ZMYND11  | 0.096109 | -0.38843 | 0.334842 | 0.741254 | 0.822944 | -6.44406 |
| LOC10028 | -0.06003 | -0.12049 | -0.33474 | 0.741332 | 0.822983 | -6.4441  |
| TXN2     | 0.054136 | 0.078906 | 0.334439 | 0.741554 | 0.823183 | -6.4442  |
| SPRED1   | -0.0295  | 0.017373 | -0.11009 | 0.913499 | 0.950461 | -6.44426 |
| EPHB4    | -0.14531 | 0.776318 | -0.33422 | 0.741718 | 0.823319 | -6.44427 |
| IGF2BP1  | -0.03243 | -0.07538 | -0.10922 | 0.914182 | 0.950841 | -6.44436 |
| LOC64151 | 0.067245 | 0.328302 | 0.109202 | 0.914195 | 0.950841 | -6.44436 |
| LOC84931 | -0.07916 | 0.144366 | -0.3028  | 0.765352 | 0.842253 | -6.44438 |
| LOC10050 | -0.04906 | -0.40322 | -0.10837 | 0.91485  | 0.951261 | -6.44446 |
| HAP1     | 0.052077 | -0.16209 | 0.333427 | 0.742306 | 0.823924 | -6.44454 |
| INPP5E   | 0.080077 | 0.116405 | 0.333102 | 0.742548 | 0.824146 | -6.44465 |

|           |          |          |          |          |          |          |
|-----------|----------|----------|----------|----------|----------|----------|
| GRP       | -0.04136 | 0.079904 | -0.30182 | 0.766093 | 0.842642 | -6.44469 |
| NIPA1     | -0.12979 | 0.502936 | -0.33279 | 0.74278  | 0.824311 | -6.44476 |
| ZNF555    | -0.06995 | 0.142067 | -0.33261 | 0.742913 | 0.824412 | -6.44482 |
| GAFA2     | -0.01992 | -0.01635 | -0.10311 | 0.918967 | 0.953973 | -6.44503 |
| CELF1     | 0.07961  | 0.285329 | 0.331981 | 0.743381 | 0.824884 | -6.44503 |
| GLIPR1    | -0.13728 | 0.489496 | -0.33158 | 0.743681 | 0.825124 | -6.44517 |
| C3P1      | 0.019133 | -0.1112  | 0.101701 | 0.920067 | 0.954913 | -6.44518 |
| COX10     | -0.06855 | 0.258013 | -0.33146 | 0.743771 | 0.825177 | -6.44521 |
| SNRPG     | 0.063397 | -0.03157 | 0.330838 | 0.744231 | 0.825594 | -6.44542 |
| ODZ3      | 0.082369 | -0.00765 | 0.330469 | 0.744506 | 0.825758 | -6.44554 |
| IL1A      | 0.051986 | 0.015845 | 0.329759 | 0.745034 | 0.826297 | -6.44578 |
| PRPSAP2   | -0.05857 | -0.0951  | -0.32952 | 0.745209 | 0.826444 | -6.44586 |
| HNRPLL    | -0.04526 | -0.01846 | -0.25617 | 0.800743 | 0.86746  | -6.446   |
| ZNF618    | 0.084517 | 0.267127 | 0.32902  | 0.745584 | 0.82675  | -6.44603 |
| ACADSB    | 0.108078 | 0.040992 | 0.328984 | 0.745611 | 0.82675  | -6.44604 |
| LYRM5     | 0.021426 | -0.02248 | 0.297185 | 0.769573 | 0.845236 | -6.44611 |
| PYDC1     | -0.06139 | 0.040613 | -0.32863 | 0.745878 | 0.826999 | -6.44617 |
| MAGEA9    | -0.14794 | -0.25268 | -0.32851 | 0.745963 | 0.827021 | -6.4462  |
| CRTAP     | 0.128113 | 0.475825 | 0.328486 | 0.745982 | 0.827021 | -6.44621 |
| HOXD8     | -0.06196 | -0.18441 | -0.3283  | 0.74612  | 0.8271   | -6.44627 |
| HCN1      | -0.10054 | 0.06539  | -0.32828 | 0.746138 | 0.8271   | -6.44628 |
| MESDC2    | 0.047049 | -0.17346 | 0.328216 | 0.746183 | 0.827103 | -6.4463  |
| GLOD4     | 0.025806 | 0.38135  | 0.09014  | 0.929126 | 0.961412 | -6.44632 |
| LOC10065  | 0.019162 | -0.20451 | 0.08996  | 0.929267 | 0.961507 | -6.44633 |
| RPP40     | -0.08332 | 0.002138 | -0.32795 | 0.746383 | 0.827278 | -6.44639 |
| FBXO41    | -0.07918 | 0.341321 | -0.32768 | 0.746582 | 0.827453 | -6.44648 |
| SLC17A3   | 0.051766 | -0.02055 | 0.327394 | 0.746795 | 0.827641 | -6.44658 |
| NPR3      | 0.087286 | 0.075522 | 0.326932 | 0.747139 | 0.827976 | -6.44673 |
| ST6GAL1   | -0.13519 | 0.505295 | -0.32655 | 0.747426 | 0.828247 | -6.44686 |
| LOC10065  | -0.12426 | 0.232358 | -0.29468 | 0.771459 | 0.846216 | -6.44687 |
| CHST9-AS1 | -0.06655 | -0.10005 | -0.29459 | 0.771525 | 0.846233 | -6.4469  |
| HSP90AA4  | 0.050422 | -0.1043  | 0.294461 | 0.771622 | 0.846253 | -6.44694 |
| SLC22A11  | 0.097068 | 0.135293 | 0.326013 | 0.747824 | 0.828641 | -6.44704 |
| TTC7A     | 0.098298 | 0.356716 | 0.325771 | 0.748004 | 0.828794 | -6.44712 |
| ANXA13    | -0.01033 | -0.21313 | -0.0674  | 0.947108 | 0.973643 | -6.44713 |
| ITGA1     | -0.14393 | 0.444169 | -0.32533 | 0.748333 | 0.829026 | -6.44727 |
| TSHZ2     | 0.064699 | -0.5347  | 0.32532  | 0.748341 | 0.829026 | -6.44727 |
| ABCA9     | 0.061085 | 0.081119 | 0.324941 | 0.748623 | 0.829265 | -6.4474  |
| AQP12A    | 0.054569 | -0.05337 | 0.324917 | 0.748641 | 0.829265 | -6.4474  |
| IPO4      | -0.08324 | 0.365598 | -0.32467 | 0.748821 | 0.829418 | -6.44748 |
| SNRPA     | -0.051   | 0.22544  | -0.32447 | 0.748972 | 0.829471 | -6.44755 |
| TTY10     | -0.1212  | 0.165349 | -0.32438 | 0.749038 | 0.829471 | -6.44758 |
| CCNDBP1   | -0.06941 | -0.16717 | -0.32434 | 0.749069 | 0.829471 | -6.44759 |
| MIR137HG  | 0.061294 | -0.0593  | 0.32427  | 0.749124 | 0.829471 | -6.44762 |
| C4orf48   | -0.07174 | 0.162333 | -0.32416 | 0.749204 | 0.829514 | -6.44765 |
| NOS2      | 0.066514 | 0.00898  | 0.324008 | 0.749319 | 0.829594 | -6.4477  |
| GZMB      | 0.177368 | 0.047778 | 0.323811 | 0.749466 | 0.82971  | -6.44777 |



|           |          |          |          |          |          |          |
|-----------|----------|----------|----------|----------|----------|----------|
| CCDC79    | -0.02369 | -0.16312 | -0.07241 | 0.943041 | 0.970837 | -6.4478  |
| RHBDD3    | 0.046647 | 0.148415 | 0.323413 | 0.749763 | 0.829991 | -6.4479  |
| WRAP53    | -0.0541  | 0.178946 | -0.32331 | 0.74984  | 0.83003  | -6.44794 |
| PRAMEF16  | -0.0847  | 0.01615  | -0.29072 | 0.774437 | 0.848555 | -6.44806 |
| MOCOS     | 0.053084 | -0.11646 | 0.322691 | 0.750301 | 0.83047  | -6.44814 |
| COBRA1    | -0.03316 | 0.151939 | -0.32266 | 0.750322 | 0.83047  | -6.44815 |
| FAM138A   | 0.062189 | -0.13686 | 0.322591 | 0.750376 | 0.830482 | -6.44817 |
| GSTM5     | 0.122397 | -0.14053 | 0.322393 | 0.750523 | 0.830586 | -6.44824 |
| SLC25A23  | -0.10241 | 0.386366 | -0.32213 | 0.750718 | 0.830586 | -6.44832 |
| ETV7      | -0.24889 | 0.751007 | -0.32212 | 0.750727 | 0.830586 | -6.44833 |
| VCX       | -0.19565 | 0.441619 | -0.32209 | 0.750747 | 0.830586 | -6.44834 |
| C2orf55   | -0.0958  | 0.206889 | -0.32205 | 0.75078  | 0.830586 | -6.44835 |
| LOC100507 | -0.02353 | -0.01412 | -0.32202 | 0.750805 | 0.830586 | -6.44836 |
| PAK7      | 0.097634 | 0.124379 | 0.32201  | 0.750809 | 0.830586 | -6.44836 |
| RCAN2     | 0.009695 | -0.36486 | 0.04388  | 0.965547 | 0.985823 | -6.44849 |
| LOC100128 | -0.06211 | 0.098365 | -0.32121 | 0.751404 | 0.831175 | -6.44863 |
| GCOM1     | -0.01854 | 0.003709 | -0.32114 | 0.75146  | 0.831175 | -6.44865 |
| FBXO25    | 0.068644 | -0.02805 | 0.321065 | 0.751515 | 0.831175 | -6.44867 |
| SCAF4     | 0.078192 | 0.243108 | 0.321    | 0.751563 | 0.831175 | -6.4487  |
| ZNF530    | -0.08802 | -0.00983 | -0.32099 | 0.751568 | 0.831175 | -6.4487  |
| IMMP1L    | -0.06561 | -0.17792 | -0.32096 | 0.751596 | 0.831175 | -6.44871 |
| ARNT2     | -0.02146 | -0.15776 | -0.0552  | 0.956562 | 0.97959  | -6.44892 |
| RUVBL2    | 0.054736 | 0.16789  | 0.320297 | 0.752088 | 0.83165  | -6.44893 |
| TMEM42    | 0.101257 | -0.16794 | 0.320268 | 0.752109 | 0.83165  | -6.44894 |
| BAK1      | -0.06369 | 0.196187 | -0.32001 | 0.752305 | 0.831772 | -6.44902 |
| TMEM19    | -0.06182 | 0.065677 | -0.31981 | 0.752455 | 0.831891 | -6.44909 |
| TMPRSS5   | -0.01155 | 0.025168 | -0.05212 | 0.958983 | 0.981217 | -6.44909 |
| DKKL1     | 0.017139 | -0.3217  | 0.049826 | 0.960784 | 0.982804 | -6.44921 |
| TNN       | -0.0157  | -0.18892 | -0.04874 | 0.961638 | 0.983128 | -6.44927 |
| TAF5      | -0.10175 | 0.03509  | -0.28625 | 0.777803 | 0.85127  | -6.44938 |
| CARD11    | -0.09909 | 0.315551 | -0.31885 | 0.753166 | 0.832583 | -6.4494  |
| AGXT2L1   | 0.017527 | -0.12963 | 0.045914 | 0.963861 | 0.98468  | -6.4494  |
| LOC100506 | -0.07892 | -0.03661 | -0.28614 | 0.777891 | 0.85127  | -6.44941 |
| GEMIN2    | -0.01549 | -0.42951 | -0.04545 | 0.964226 | 0.984834 | -6.44943 |
| KIAA1456  | 0.069844 | -0.23247 | 0.318648 | 0.753319 | 0.832706 | -6.44946 |
| FAM117B   | -0.07219 | 0.275019 | -0.31826 | 0.753611 | 0.832934 | -6.44959 |
| GUSBP5    | -0.02254 | -0.01764 | -0.2854  | 0.77845  | 0.851692 | -6.44963 |
| GLRB      | -0.04331 | 0.008663 | -0.31757 | 0.754123 | 0.833406 | -6.44981 |
| POGZ      | -0.05098 | -0.04601 | -0.31698 | 0.754566 | 0.833848 | -6.45001 |
| DGCR5     | 0.00723  | -0.23281 | 0.027955 | 0.977991 | 0.994673 | -6.45009 |
| C1orf129  | 0.065924 | -0.03176 | 0.31673  | 0.754753 | 0.833963 | -6.45009 |
| PLCE1     | 0.082926 | 0.035052 | 0.316727 | 0.754755 | 0.833963 | -6.45009 |
| LOC100136 | -0.10107 | 0.227128 | -0.2838  | 0.779654 | 0.852324 | -6.45009 |
| TMEM54    | -0.07935 | 0.441414 | -0.28345 | 0.779921 | 0.852485 | -6.4502  |
| NID2      | 0.00791  | 0.027621 | 0.018391 | 0.98552  | 0.999705 | -6.45031 |
| C1orf201  | 0.066574 | 0.075044 | 0.315735 | 0.755497 | 0.834689 | -6.45041 |
| STX1B     | -0.00481 | -0.15812 | -0.01176 | 0.990742 | 1        | -6.45042 |

|           |          |          |          |          |          |          |
|-----------|----------|----------|----------|----------|----------|----------|
| DKFZP564C | -0.00365 | 0.102009 | -0.01145 | 0.990984 | 1        | -6.45042 |
| C20orf173 | 0.001336 | -0.47002 | 0.004421 | 0.996519 | 1        | -6.45048 |
| ZFY       | -0.00096 | -0.14327 | -0.00326 | 0.997435 | 1        | -6.45048 |
| TDGF1P3   | 0        | 0        | 0        | 1        | 1        | -6.45049 |
| SOX2-OT   | 0        | 0        | 0        | 1        | 1        | -6.45049 |
| RASSF6    | 0        | 0        | 0        | 1        | 1        | -6.45049 |
| PAR5      | 0        | 0        | 0        | 1        | 1        | -6.45049 |
| ODZ1      | 0.057737 | -0.11334 | 0.315463 | 0.7557   | 0.834867 | -6.4505  |
| COL23A1   | -0.08347 | -0.26654 | -0.31528 | 0.755834 | 0.834925 | -6.45055 |
| SNX32     | -0.06932 | 0.109116 | -0.31528 | 0.755839 | 0.834925 | -6.45056 |
| HOMEZ     | 0.163042 | 0.088649 | 0.314845 | 0.756162 | 0.835185 | -6.4507  |
| MED9      | 0.047237 | -0.20524 | 0.314792 | 0.756202 | 0.835185 | -6.45071 |
| CD226     | -0.07433 | 0.150601 | -0.31444 | 0.756468 | 0.83539  | -6.45083 |
| STARD9    | 0.050525 | -0.0628  | 0.31443  | 0.756473 | 0.83539  | -6.45083 |
| IL20RB    | -0.06774 | 0.282591 | -0.31417 | 0.756667 | 0.835558 | -6.45091 |
| TTR       | -0.0828  | 0.115103 | -0.28087 | 0.781866 | 0.853761 | -6.45094 |
| TAPBPL    | -0.06096 | 0.052966 | -0.31393 | 0.756845 | 0.835707 | -6.45099 |
| ACBD3     | 0.041757 | -0.25162 | 0.313699 | 0.75702  | 0.835853 | -6.45106 |
| KIAA0226  | 0.06663  | 0.155034 | 0.313627 | 0.757074 | 0.835865 | -6.45109 |
| TTY7      | 0.018779 | -0.0157  | 0.280066 | 0.782475 | 0.853998 | -6.45117 |
| DDX10     | 0.089989 | 0.271318 | 0.311949 | 0.75833  | 0.83719  | -6.45162 |
| TASP1     | 0.077212 | -0.1169  | 0.31191  | 0.758359 | 0.83719  | -6.45164 |
| NOM1      | 0.114858 | 0.16632  | 0.31154  | 0.758636 | 0.837448 | -6.45175 |
| MTPAP     | 0.064497 | 0.007805 | 0.311405 | 0.758737 | 0.837464 | -6.4518  |
| CXCR6     | 0.159163 | 0.446769 | 0.311262 | 0.758845 | 0.837464 | -6.45184 |
| FOXO3     | -0.08277 | 0.39972  | -0.31121 | 0.758885 | 0.837464 | -6.45186 |
| RNF220    | 0.045656 | -0.08488 | 0.311179 | 0.758907 | 0.837464 | -6.45187 |
| DBT       | -0.04801 | 0.058466 | -0.31111 | 0.758958 | 0.837474 | -6.45189 |
| MGC2752   | -0.07861 | 0.008947 | -0.31064 | 0.75931  | 0.837815 | -6.45204 |
| TRIM59    | -0.12748 | -0.28553 | -0.31054 | 0.759382 | 0.837848 | -6.45207 |
| PDP1      | 0.073084 | -0.14845 | 0.310358 | 0.759521 | 0.837926 | -6.45213 |
| LRMP      | -0.08916 | -0.07374 | -0.31028 | 0.759582 | 0.837926 | -6.45215 |
| FOLH1B    | 0.042468 | -0.03696 | 0.231474 | 0.819577 | 0.88177  | -6.45219 |
| ANGPTL4   | -0.04629 | -0.14514 | -0.27648 | 0.785187 | 0.856052 | -6.4522  |
| PFDN5     | 0.155531 | -0.85366 | 0.309942 | 0.759833 | 0.838148 | -6.45226 |
| FBLN7     | -0.0723  | -0.05396 | -0.3099  | 0.759868 | 0.838148 | -6.45228 |
| DPY19L2P2 | 0.089685 | -0.12383 | 0.309623 | 0.760072 | 0.838325 | -6.45236 |
| COPG2     | 0.018894 | -0.01564 | 0.275866 | 0.78565  | 0.856413 | -6.45237 |
| DLX1      | 0.085716 | -0.03068 | 0.30956  | 0.760119 | 0.838331 | -6.45238 |
| RPP25     | 0.080423 | 0.434019 | 0.309414 | 0.760229 | 0.838404 | -6.45243 |
| FGF13     | -0.14441 | 0.472411 | -0.30893 | 0.760592 | 0.838757 | -6.45258 |
| REPS1     | 0.055855 | -0.10384 | 0.308779 | 0.760705 | 0.838834 | -6.45263 |
| APOL3     | 0.065716 | 0.018296 | 0.308051 | 0.76125  | 0.839389 | -6.45286 |
| CDY2A     | -0.10409 | -0.04496 | -0.27402 | 0.787045 | 0.857457 | -6.45289 |
| C7orf45   | -0.07745 | -0.09271 | -0.30773 | 0.761488 | 0.839557 | -6.45296 |
| C11orf70  | -0.12557 | 0.019771 | -0.30767 | 0.761537 | 0.839563 | -6.45298 |
| CDV3      | -0.06987 | 0.36366  | -0.3075  | 0.761665 | 0.839657 | -6.45303 |

|           |          |          |          |          |          |          |
|-----------|----------|----------|----------|----------|----------|----------|
| GPRC5A    | 0.065194 | -0.0138  | 0.307203 | 0.761886 | 0.839854 | -6.45312 |
| PTCD2     | -0.08723 | 0.299037 | -0.3065  | 0.762414 | 0.840332 | -6.45335 |
| LOC28370  | -0.05484 | -0.38748 | -0.30637 | 0.762514 | 0.840332 | -6.45339 |
| CKS1B     | -0.10429 | 0.070823 | -0.30634 | 0.762535 | 0.840332 | -6.4534  |
| DMC1      | -0.09389 | -0.01387 | -0.30614 | 0.762683 | 0.840448 | -6.45346 |
| UNC5C     | 0.063905 | 0.162608 | 0.306021 | 0.762773 | 0.8405   | -6.4535  |
| NIM1      | -0.05323 | -0.0288  | -0.30585 | 0.762903 | 0.84056  | -6.45355 |
| SLC35E2   | 0.06161  | -0.11709 | 0.305834 | 0.762913 | 0.84056  | -6.45355 |
| SSR2      | -0.05859 | -0.0754  | -0.30542 | 0.763225 | 0.840857 | -6.45368 |
| CCNE2     | -0.13432 | -0.02503 | -0.3053  | 0.763313 | 0.840906 | -6.45372 |
| TCP1      | 0.054499 | -0.07429 | 0.305233 | 0.763364 | 0.840915 | -6.45374 |
| MAT2B     | 0.094696 | -0.37327 | 0.305007 | 0.763534 | 0.841055 | -6.45381 |
| RAX       | -0.05015 | -0.12334 | -0.30485 | 0.763648 | 0.841133 | -6.45386 |
| KRTAP9-9  | -0.08566 | 0.161409 | -0.30449 | 0.76392  | 0.841386 | -6.45397 |
| IRS1      | 0.020155 | -0.00448 | 0.223815 | 0.825441 | 0.885987 | -6.45398 |
| SEPP1     | -0.0723  | 0.196147 | -0.26989 | 0.790174 | 0.859575 | -6.45404 |
| CXCL1     | -0.09988 | 0.180297 | -0.30388 | 0.764382 | 0.841813 | -6.45416 |
| MZB1      | -0.09105 | 0.623804 | -0.30385 | 0.764403 | 0.841813 | -6.45417 |
| RXRB      | -0.0944  | -0.1334  | -0.3037  | 0.764511 | 0.841813 | -6.45422 |
| GREM1     | -0.03025 | -0.03374 | -0.30368 | 0.764532 | 0.841813 | -6.45423 |
| ZBTB24    | -0.06551 | 0.27298  | -0.30366 | 0.764542 | 0.841813 | -6.45423 |
| CBX7      | 0.090883 | 0.379158 | 0.303631 | 0.764566 | 0.841813 | -6.45424 |
| P2RY6     | 0.104917 | -0.00306 | 0.303525 | 0.764646 | 0.841815 | -6.45427 |
| KIAA1671  | -0.12546 | 0.138523 | -0.30347 | 0.764689 | 0.841815 | -6.45429 |
| SLIRP     | -0.09626 | 0.119577 | -0.30346 | 0.764697 | 0.841815 | -6.45429 |
| SP140     | 0.080265 | 0.224478 | 0.303312 | 0.764806 | 0.841833 | -6.45434 |
| PUS7      | -0.08279 | -0.02403 | -0.30328 | 0.76483  | 0.841833 | -6.45435 |
| ZNF600    | 0.113526 | 0.065085 | 0.303263 | 0.764842 | 0.841833 | -6.45435 |
| PKIA      | -0.10826 | -0.06443 | -0.30317 | 0.764914 | 0.841865 | -6.45438 |
| C17orf100 | -0.1132  | 0.43929  | -0.26854 | 0.7912   | 0.8605   | -6.45441 |
| ECEL1     | -0.08609 | -0.37725 | -0.3027  | 0.765264 | 0.842203 | -6.45453 |
| PRMT1     | 0.071976 | 0.194845 | 0.302433 | 0.765466 | 0.842331 | -6.45461 |
| CEP128    | -0.07682 | 0.039753 | -0.30234 | 0.765535 | 0.84236  | -6.45464 |
| HS3ST3A1  | 0.019407 | -0.01324 | 0.302274 | 0.765586 | 0.842368 | -6.45466 |
| HIST1H2BC | -0.08862 | 0.197545 | -0.30197 | 0.765814 | 0.842572 | -6.45475 |
| HAAO      | 0.090285 | 0.011517 | 0.301844 | 0.765908 | 0.842586 | -6.45479 |
| SPSB2     | -0.09618 | 0.13108  | -0.30184 | 0.765913 | 0.842586 | -6.45479 |
| TMEM154   | 0.090414 | -0.08094 | 0.30172  | 0.766001 | 0.842603 | -6.45483 |
| CDC42BPG  | 0.118396 | 0.310655 | 0.301703 | 0.766015 | 0.842603 | -6.45484 |
| CTDSPL    | -0.15666 | 0.745839 | -0.30149 | 0.766173 | 0.842683 | -6.4549  |
| AIM1L     | -0.05138 | 0.371517 | -0.30125 | 0.766357 | 0.842838 | -6.45498 |
| PANK2     | -0.11811 | 0.57827  | -0.30106 | 0.766497 | 0.842945 | -6.45503 |
| SREBF1    | 0.056275 | 0.094727 | 0.300797 | 0.766695 | 0.843115 | -6.45512 |
| AIMP1     | -0.07626 | -0.25604 | -0.30057 | 0.766867 | 0.843257 | -6.45519 |
| C20orf166 | 0.037935 | -0.00759 | 0.300385 | 0.767005 | 0.843361 | -6.45524 |
| LOC15762  | 0.049972 | -0.16325 | 0.3001   | 0.767219 | 0.843549 | -6.45533 |
| TACO1     | -0.07302 | 0.245688 | -0.29985 | 0.767407 | 0.843708 | -6.45541 |

|          |          |          |          |          |          |          |
|----------|----------|----------|----------|----------|----------|----------|
| MAGEE2   | -0.0575  | 0.022511 | -0.26471 | 0.7941   | 0.862601 | -6.45546 |
| HIP1R    | -0.09255 | 0.29352  | -0.29966 | 0.767549 | 0.843814 | -6.45546 |
| SCAND1   | 0.064497 | 0.094858 | 0.299608 | 0.767589 | 0.843814 | -6.45548 |
| LSM5     | -0.09761 | -0.15031 | -0.29954 | 0.767637 | 0.843819 | -6.4555  |
| ZNF581   | 0.055351 | 0.051346 | 0.299092 | 0.767977 | 0.844094 | -6.45564 |
| ANG      | 0.124919 | 0.339974 | 0.299039 | 0.768016 | 0.844094 | -6.45565 |
| MAPK8IP1 | 0.15261  | -0.12095 | 0.298851 | 0.768158 | 0.844202 | -6.45571 |
| AIM1     | -0.05755 | -0.36873 | -0.29835 | 0.768533 | 0.844567 | -6.45586 |
| PPFIBP2  | 0.07287  | 0.284281 | 0.298022 | 0.768781 | 0.844793 | -6.45596 |
| PPIP5K1  | 0.062362 | 0.199668 | 0.297907 | 0.768867 | 0.84484  | -6.456   |
| IDO1     | -0.19606 | -0.21369 | -0.29779 | 0.768955 | 0.844889 | -6.45604 |
| OR1A1    | 0.035317 | -0.07757 | 0.262361 | 0.795887 | 0.863632 | -6.4561  |
| FILIP1   | 0.079518 | 0.261396 | 0.2975   | 0.769174 | 0.845034 | -6.45612 |
| GSDMB    | -0.07831 | 0.293869 | -0.29742 | 0.769235 | 0.845036 | -6.45615 |
| ATP8B1   | -0.12247 | 0.074937 | -0.29738 | 0.769261 | 0.845036 | -6.45616 |
| KLHL14   | 0.078648 | -0.09652 | 0.297285 | 0.769335 | 0.84507  | -6.45619 |
| APOM     | 0.068911 | -0.11068 | 0.297098 | 0.769476 | 0.845177 | -6.45625 |
| FAM26E   | -0.15438 | 0.714755 | -0.29685 | 0.769664 | 0.845288 | -6.45632 |
| EPB41L2  | -0.06822 | 0.350422 | -0.2966  | 0.769851 | 0.845411 | -6.4564  |
| FLJ22763 | -0.08977 | -0.12003 | -0.29659 | 0.769861 | 0.845411 | -6.4564  |
| CCDC56   | -0.06143 | 0.128099 | -0.29639 | 0.770006 | 0.845502 | -6.45646 |
| MEOX2    | 0.107724 | 0.152414 | 0.29636  | 0.770031 | 0.845502 | -6.45647 |
| PNKP     | 0.047854 | 0.050414 | 0.29593  | 0.770355 | 0.845677 | -6.4566  |
| SIT1     | 0.111739 | 0.283681 | 0.295927 | 0.770357 | 0.845677 | -6.4566  |
| LOC15756 | 0.081327 | 0.166491 | 0.29592  | 0.770363 | 0.845677 | -6.4566  |
| SNORA70  | 0.040762 | -0.16097 | 0.295604 | 0.7706   | 0.845792 | -6.4567  |
| LOC28441 | -0.08717 | 0.085713 | -0.2956  | 0.770605 | 0.845792 | -6.4567  |
| EPC2     | -0.05312 | -0.37138 | -0.29555 | 0.77064  | 0.845792 | -6.45671 |
| SALL4    | -0.07868 | -0.12508 | -0.29547 | 0.770704 | 0.845815 | -6.45674 |
| LOC10013 | -0.08091 | 0.111854 | -0.29513 | 0.770954 | 0.846041 | -6.45684 |
| ACTR8    | -0.07424 | 0.133811 | -0.29501 | 0.771049 | 0.846065 | -6.45688 |
| tAKR     | 0.024888 | -0.09443 | 0.132802 | 0.895921 | 0.937951 | -6.45689 |
| PELI2    | 0.070851 | -0.15221 | 0.294939 | 0.771101 | 0.846065 | -6.4569  |
| POLR1E   | -0.0959  | 0.452398 | -0.29493 | 0.771105 | 0.846065 | -6.4569  |
| RAPH1    | -0.03853 | -0.29144 | -0.25928 | 0.798227 | 0.865494 | -6.45692 |
| CYP46A1  | 0.04489  | -0.23241 | 0.25923  | 0.798265 | 0.865494 | -6.45693 |
| DDR1     | 0.09296  | 0.513947 | 0.294781 | 0.77122  | 0.846137 | -6.45695 |
| PDE4DIP  | 0.053386 | 0.147767 | 0.294697 | 0.771283 | 0.846137 | -6.45697 |
| CCDC144N | 0.048109 | -0.05406 | 0.294674 | 0.7713   | 0.846137 | -6.45698 |
| LOC10050 | 0.063464 | -0.26172 | 0.29449  | 0.771439 | 0.846216 | -6.45704 |
| PEX6     | 0.099764 | 0.040402 | 0.294328 | 0.771561 | 0.846233 | -6.45708 |
| TREML3   | 0.080503 | 0.235959 | 0.13071  | 0.897551 | 0.938942 | -6.45718 |
| LOC64424 | -0.06255 | -0.05818 | -0.2938  | 0.771961 | 0.846532 | -6.45724 |
| ADH1A    | 0.055104 | -0.04758 | 0.293795 | 0.771962 | 0.846532 | -6.45724 |
| OASL     | 0.169493 | 0.37128  | 0.293442 | 0.772228 | 0.846775 | -6.45735 |
| IBTK     | 0.087305 | -0.2273  | 0.257442 | 0.799625 | 0.866537 | -6.45741 |
| SMAD4    | -0.08037 | 0.13786  | -0.29298 | 0.772576 | 0.84711  | -6.45749 |

|           |          |          |          |          |          |          |
|-----------|----------|----------|----------|----------|----------|----------|
| GRM2      | 0.052469 | -0.10422 | 0.292871 | 0.772658 | 0.847152 | -6.45752 |
| C16orf73  | 0.056328 | -0.27756 | 0.292582 | 0.772876 | 0.847344 | -6.45761 |
| BNIP3     | -0.06774 | -0.19029 | -0.29197 | 0.773335 | 0.847799 | -6.45779 |
| MMP15     | -0.05124 | -0.02492 | -0.29155 | 0.773653 | 0.848101 | -6.45792 |
| ERBB2IP   | -0.08112 | -0.17841 | -0.29136 | 0.773797 | 0.848158 | -6.45797 |
| MRPS33    | 0.102825 | -0.4428  | 0.291342 | 0.77381  | 0.848158 | -6.45798 |
| MAMDC4    | -0.04101 | 0.210945 | -0.29131 | 0.773835 | 0.848158 | -6.45799 |
| RFX5      | 0.064386 | 0.136714 | 0.254757 | 0.801667 | 0.868174 | -6.45811 |
| KIFAP3    | -0.05723 | -0.12847 | -0.29087 | 0.774167 | 0.848474 | -6.45812 |
| IQCF3     | 0.045837 | -0.37911 | 0.123282 | 0.903341 | 0.94335  | -6.45815 |
| SPAG17    | 0.044672 | -0.14611 | 0.290739 | 0.774264 | 0.848534 | -6.45816 |
| ZCCHC13   | 0.08255  | -0.14343 | 0.290624 | 0.774352 | 0.848555 | -6.45819 |
| C3orf45   | -0.15623 | 0.716447 | -0.29052 | 0.774427 | 0.848555 | -6.45822 |
| FGF18     | 0.033593 | -0.19164 | 0.204564 | 0.840225 | 0.896844 | -6.45822 |
| SERPIND1  | 0.032655 | -0.06173 | 0.290484 | 0.774457 | 0.848555 | -6.45823 |
| AFAP1L2   | -0.08952 | 0.540659 | -0.29035 | 0.774554 | 0.848614 | -6.45827 |
| SUCNR1    | 0.136681 | 0.17696  | 0.290023 | 0.774805 | 0.848794 | -6.45837 |
| SPIB      | -0.10927 | 0.425932 | -0.28905 | 0.775537 | 0.849474 | -6.45866 |
| ATP5G1    | -0.07141 | 0.216175 | -0.28893 | 0.775629 | 0.849474 | -6.45869 |
| PCID2     | -0.07532 | 0.137865 | -0.28892 | 0.775636 | 0.849474 | -6.4587  |
| ENOX2     | 0.054785 | -0.12444 | 0.288912 | 0.775642 | 0.849474 | -6.4587  |
| SLC38A4   | -0.05312 | -0.08549 | -0.28871 | 0.775791 | 0.84959  | -6.45876 |
| HERPUD1   | 0.049475 | -0.05954 | 0.288479 | 0.775969 | 0.849736 | -6.45883 |
| MTSS1L    | -0.09386 | 0.014374 | -0.28838 | 0.776042 | 0.849769 | -6.45886 |
| ALG9      | 0.109119 | -0.08946 | 0.287822 | 0.776464 | 0.850136 | -6.45902 |
| MPPED2    | -0.08965 | -0.03767 | -0.2876  | 0.776632 | 0.850272 | -6.45909 |
| OPRM1     | 0.110322 | 0.167627 | 0.287265 | 0.776885 | 0.850502 | -6.45918 |
| TOE1      | -0.08413 | 0.211923 | -0.2871  | 0.777011 | 0.850572 | -6.45923 |
| MED15     | -0.05193 | 0.202616 | -0.28706 | 0.777036 | 0.850572 | -6.45924 |
| KIAA1486  | -0.06096 | -0.00515 | -0.28699 | 0.77709  | 0.850584 | -6.45926 |
| DUS4L     | -0.10194 | 0.14035  | -0.24943 | 0.805725 | 0.871461 | -6.45949 |
| ATR       | -0.07208 | -0.04011 | -0.28602 | 0.777822 | 0.85127  | -6.45955 |
| GATS      | 0.079633 | 0.157404 | 0.285946 | 0.77788  | 0.85127  | -6.45957 |
| LOC44079  | -0.03923 | -0.04926 | -0.28552 | 0.778204 | 0.851518 | -6.4597  |
| AP2A1     | 0.079995 | 0.340444 | 0.285381 | 0.778307 | 0.851582 | -6.45974 |
| WNT9A     | -0.07115 | 0.021752 | -0.2483  | 0.806585 | 0.872132 | -6.45978 |
| NTF3      | -0.04981 | -0.1025  | -0.24822 | 0.806647 | 0.872132 | -6.4598  |
| PPIE      | 0.076335 | 0.051797 | 0.284988 | 0.778603 | 0.851812 | -6.45985 |
| CCL17     | 0.047856 | -0.13761 | 0.284869 | 0.778693 | 0.851862 | -6.45989 |
| ZNF77     | -0.07772 | 0.320432 | -0.28456 | 0.778923 | 0.852019 | -6.45997 |
| HDAC6     | 0.035508 | 0.098419 | 0.284314 | 0.779112 | 0.852178 | -6.46005 |
| WDR63     | -0.03185 | -0.21656 | -0.24723 | 0.8074   | 0.87265  | -6.46005 |
| SCRIB     | 0.037287 | 0.301226 | 0.284151 | 0.779235 | 0.852265 | -6.46009 |
| MED18     | -0.0939  | -0.04972 | -0.24702 | 0.80756  | 0.872675 | -6.4601  |
| ANKRD30B  | 0.076824 | 0.07162  | 0.283795 | 0.779504 | 0.852324 | -6.4602  |
| SERPINB12 | -0.06444 | 0.018151 | -0.28378 | 0.779518 | 0.852324 | -6.4602  |
| TTY2      | -0.0658  | 0.061075 | -0.28364 | 0.779625 | 0.852324 | -6.46024 |

|           |          |          |          |          |          |          |
|-----------|----------|----------|----------|----------|----------|----------|
| FBXO46    | 0.054707 | 0.093464 | 0.283635 | 0.779625 | 0.852324 | -6.46024 |
| FH        | -0.04476 | 0.037706 | -0.28359 | 0.77966  | 0.852324 | -6.46026 |
| SH3BP5L   | -0.05935 | 0.128297 | -0.28359 | 0.779662 | 0.852324 | -6.46026 |
| ARNTL2    | -0.06864 | -0.15897 | -0.28356 | 0.779681 | 0.852324 | -6.46027 |
| NUP35     | 0.070548 | -0.30712 | 0.2833   | 0.779879 | 0.852485 | -6.46034 |
| TMEM37    | 0.049839 | 0.030428 | 0.283194 | 0.779958 | 0.852485 | -6.46037 |
| MALL      | -0.08346 | 0.231399 | -0.2829  | 0.780183 | 0.852683 | -6.46046 |
| THAP3     | 0.040863 | -0.02453 | 0.282493 | 0.780488 | 0.852922 | -6.46057 |
| TBX20     | -0.1394  | 0.345776 | -0.28232 | 0.780619 | 0.853017 | -6.46062 |
| LY6E      | -0.16719 | 0.705795 | -0.28222 | 0.780696 | 0.85305  | -6.46065 |
| TMEM201   | -0.05127 | -0.30021 | -0.28216 | 0.780736 | 0.85305  | -6.46067 |
| SH3BGRL   | -0.09623 | -0.26513 | -0.28205 | 0.780826 | 0.853101 | -6.4607  |
| IQCA1     | 0.102629 | 0.283245 | 0.281967 | 0.780886 | 0.853118 | -6.46073 |
| PCDHGC3   | 0.089626 | -0.07636 | 0.281868 | 0.78096  | 0.853152 | -6.46076 |
| RGS7      | 0.102687 | 0.155547 | 0.244411 | 0.809551 | 0.874276 | -6.46076 |
| KCTD12    | -0.07959 | -0.10577 | -0.28166 | 0.781116 | 0.853227 | -6.46081 |
| FAP       | -0.14314 | 0.364793 | -0.28086 | 0.781721 | 0.853745 | -6.46104 |
| ZCCHC2    | -0.09067 | 0.423684 | -0.28078 | 0.781785 | 0.853753 | -6.46107 |
| LOC100506 | -0.10578 | -0.12281 | -0.28074 | 0.781815 | 0.853753 | -6.46108 |
| ATF7IP    | 0.073349 | 0.06941  | 0.280496 | 0.781997 | 0.853838 | -6.46115 |
| SLC22A6   | -0.03929 | 0.093    | -0.28046 | 0.782024 | 0.853838 | -6.46116 |
| PRKACB    | 0.118493 | -0.31118 | 0.280295 | 0.782149 | 0.853844 | -6.46121 |
| GLG1      | -0.06443 | 0.332401 | -0.28028 | 0.782162 | 0.853844 | -6.46121 |
| ADAM19    | -0.06465 | 0.139061 | -0.28013 | 0.782278 | 0.853877 | -6.46126 |
| DVL2      | -0.08878 | 0.511922 | -0.28002 | 0.782356 | 0.853915 | -6.46129 |
| NCOA1     | -0.08032 | 0.324884 | -0.27978 | 0.782538 | 0.854019 | -6.46135 |
| DOHH      | -0.06958 | 0.086267 | -0.27939 | 0.782834 | 0.854294 | -6.46147 |
| MRPL21    | -0.07479 | -0.00556 | -0.27879 | 0.783285 | 0.85471  | -6.46164 |
| GPR37     | 0.150627 | 0.185995 | 0.27877  | 0.783303 | 0.85471  | -6.46164 |
| EFCAB4B   | -0.0661  | 0.193    | -0.2783  | 0.783659 | 0.854949 | -6.46178 |
| ZNF223    | -0.06597 | 0.057746 | -0.27823 | 0.783711 | 0.854949 | -6.4618  |
| TAL2      | 0.076109 | 0.032297 | 0.278192 | 0.78374  | 0.854949 | -6.46181 |
| PDE2A     | -0.09977 | 0.546608 | -0.27814 | 0.783782 | 0.854949 | -6.46182 |
| SLC22A3   | 0.076053 | -0.35809 | 0.278135 | 0.783783 | 0.854949 | -6.46182 |
| LOC100128 | 0.089465 | -0.1549  | 0.277786 | 0.784047 | 0.855142 | -6.46192 |
| CACNB2    | 0.082349 | 0.1765   | 0.277383 | 0.784352 | 0.855427 | -6.46204 |
| AVPR2     | 0.038577 | -0.02195 | 0.27729  | 0.784423 | 0.855456 | -6.46206 |
| ROPN1L-A  | -0.10827 | 0.202512 | -0.27706 | 0.784596 | 0.855598 | -6.46213 |
| PHF12     | -0.13238 | 0.246124 | -0.23864 | 0.813954 | 0.877455 | -6.46219 |
| TMEM132I  | 0.037968 | -0.18841 | 0.238516 | 0.814053 | 0.877465 | -6.46222 |
| ARRDC5    | 0.056461 | 0.012152 | 0.276723 | 0.784851 | 0.855828 | -6.46223 |
| RAMP1     | 0.101824 | -0.01819 | 0.276645 | 0.784911 | 0.855845 | -6.46225 |
| IKBIP     | -0.07225 | 0.04075  | -0.23823 | 0.81427  | 0.877651 | -6.46229 |
| DHX32     | -0.04198 | -0.08382 | -0.27638 | 0.785109 | 0.856014 | -6.46232 |
| MS4A8B    | 0.022698 | -0.00504 | 0.183805 | 0.856237 | 0.908344 | -6.46237 |
| SPATA9    | -0.04476 | 0.090317 | -0.23786 | 0.814551 | 0.877905 | -6.46238 |
| LOC38904  | -0.0186  | -0.01116 | -0.27617 | 0.785269 | 0.856093 | -6.46238 |

|               |          |          |          |          |          |          |
|---------------|----------|----------|----------|----------|----------|----------|
| GNGT2         | -0.07413 | 0.43646  | -0.27546 | 0.785809 | 0.856461 | -6.46258 |
| BOLA2B        | 0.074619 | -0.11673 | 0.275443 | 0.785821 | 0.856461 | -6.46259 |
| GGT7          | 0.05237  | 0.056545 | 0.275437 | 0.785825 | 0.856461 | -6.46259 |
| LOC283661     | 0.016779 | -0.13747 | 0.081225 | 0.936219 | 0.966444 | -6.4626  |
| AQPEP         | -0.03846 | 0.036826 | -0.27462 | 0.786447 | 0.857092 | -6.46282 |
| BTBD16        | -0.0491  | 0.003758 | -0.27428 | 0.786704 | 0.857287 | -6.46291 |
| C5orf43       | 0.081575 | 0.116192 | 0.274263 | 0.786714 | 0.857287 | -6.46292 |
| MYBBP1A       | -0.05989 | 0.325161 | -0.27407 | 0.786859 | 0.857349 | -6.46297 |
| SORD          | -0.07356 | 0.173487 | -0.27391 | 0.786982 | 0.857436 | -6.46302 |
| ELAVL3        | 0.046543 | -0.05392 | 0.273721 | 0.787125 | 0.857472 | -6.46307 |
| MFN2          | -0.08449 | 0.324308 | -0.27369 | 0.787147 | 0.857472 | -6.46308 |
| SPATS2L       | -0.16444 | 0.563861 | -0.27348 | 0.787306 | 0.857598 | -6.46314 |
| CYP4V2        | -0.08832 | 0.379065 | -0.27338 | 0.787387 | 0.857638 | -6.46317 |
| IFNA16        | 0.017573 | -0.02181 | 0.234526 | 0.817103 | 0.879978 | -6.46319 |
| KIAA1737      | 0.052244 | -0.21089 | 0.272852 | 0.787783 | 0.858022 | -6.46331 |
| ZSCAN12P1     | -0.07411 | -0.05893 | -0.27264 | 0.787942 | 0.858147 | -6.46337 |
| ORM2          | -0.13782 | -0.10621 | -0.27244 | 0.788097 | 0.858269 | -6.46343 |
| SVOP          | 0.038955 | -0.24429 | 0.177329 | 0.861245 | 0.912195 | -6.46358 |
| ANKRD50       | 0.130513 | 0.165348 | 0.271805 | 0.788577 | 0.858696 | -6.46361 |
| THBD          | -0.14452 | -0.00555 | -0.27152 | 0.788792 | 0.858882 | -6.46368 |
| LOC401055     | 0.067078 | 0.508741 | 0.271428 | 0.788862 | 0.858912 | -6.46371 |
| ZNF512B       | -0.0907  | 0.204147 | -0.27134 | 0.788926 | 0.858933 | -6.46373 |
| U2AF2         | 0.052726 | 0.381825 | 0.271119 | 0.789097 | 0.859071 | -6.4638  |
| ARHGEF10      | 0.109507 | -0.0826  | 0.270927 | 0.789242 | 0.859182 | -6.46385 |
| FBXO24        | 0.055385 | 0.156556 | 0.270727 | 0.789394 | 0.859254 | -6.4639  |
| DOCK6         | 0.068133 | 0.414616 | 0.270724 | 0.789396 | 0.859254 | -6.46391 |
| DKFZp547J12.1 | -0.03033 | 0.006066 | -0.27051 | 0.789561 | 0.859337 | -6.46397 |
| DYNC1I1       | -0.09417 | 0.083346 | -0.23123 | 0.819624 | 0.881772 | -6.46398 |
| HSPD1         | -0.07962 | 0.203225 | -0.27039 | 0.789653 | 0.859387 | -6.464   |
| ST8SIA3       | 0.051403 | -0.21679 | 0.270227 | 0.789773 | 0.859425 | -6.46404 |
| NPAT          | -0.09388 | 0.068642 | -0.27003 | 0.789923 | 0.859514 | -6.4641  |
| KCNJ12        | 0.088476 | 0.176767 | 0.269971 | 0.789967 | 0.859514 | -6.46411 |
| LRRC4C        | -0.11357 | 0.000526 | -0.26991 | 0.79001  | 0.859514 | -6.46413 |
| PPP6R1        | -0.04608 | 0.097556 | -0.26981 | 0.790089 | 0.859531 | -6.46416 |
| IGFBP5        | 0.015469 | -0.00309 | 0.269616 | 0.790236 | 0.859595 | -6.46421 |
| ADO           | -0.01628 | -0.02435 | -0.17322 | 0.864426 | 0.914396 | -6.46432 |
| LOC100128101  | -0.05585 | 0.012411 | -0.1732  | 0.864444 | 0.914396 | -6.46432 |
| ZNF461        | -0.08761 | 0.061969 | -0.26904 | 0.790672 | 0.860021 | -6.46437 |
| PARP12        | -0.11606 | 0.215149 | -0.26877 | 0.790879 | 0.860198 | -6.46444 |
| ZNF479        | -0.07797 | 0.092389 | -0.2287  | 0.821566 | 0.88294  | -6.46458 |
| HSFY2         | 0.140354 | 0.340375 | 0.267795 | 0.791618 | 0.860907 | -6.46471 |
| C9orf129      | -0.04644 | 0.017517 | -0.26773 | 0.791671 | 0.860917 | -6.46473 |
| EGFL7         | -0.07181 | 0.370817 | -0.26741 | 0.791907 | 0.861042 | -6.46482 |
| RHOD          | 0.065498 | 0.081063 | 0.267404 | 0.791915 | 0.861042 | -6.46482 |
| LINC00246     | -0.05882 | 0.029363 | -0.2674  | 0.791918 | 0.861042 | -6.46482 |
| PDCD2L        | 0.091207 | 0.176121 | 0.267172 | 0.792091 | 0.86114  | -6.46488 |
| ACSM1         | -0.01422 | -0.07514 | -0.0466  | 0.963379 | 0.984328 | -6.46488 |

|           |          |          |          |          |          |          |
|-----------|----------|----------|----------|----------|----------|----------|
| HLA-DRA   | 0.274728 | -0.51376 | 0.267165 | 0.792096 | 0.86114  | -6.46488 |
| ARHGEF3   | 0.084397 | -0.12705 | 0.26701  | 0.792214 | 0.861202 | -6.46493 |
| PIGT      | -0.03629 | 0.072815 | -0.26696 | 0.792252 | 0.861202 | -6.46494 |
| EYA1      | -0.05619 | -0.03473 | -0.2669  | 0.792297 | 0.861202 | -6.46496 |
| MIR210HG  | -0.0153  | 0.00096  | -0.26686 | 0.792328 | 0.861202 | -6.46497 |
| GNG12     | -0.05404 | -0.01852 | -0.26645 | 0.792642 | 0.861486 | -6.46508 |
| PMEPA1    | 0.086918 | 0.236979 | 0.266398 | 0.792678 | 0.861486 | -6.46509 |
| CD99L2    | -0.05916 | -0.03514 | -0.26595 | 0.79302  | 0.861788 | -6.46522 |
| ZNF706    | -0.05041 | -0.08003 | -0.26592 | 0.793044 | 0.861788 | -6.46523 |
| ZNF503-AS | 0.008636 | -0.17559 | 0.038797 | 0.969508 | 0.988785 | -6.46523 |
| OR51B4    | -0.04597 | 0.079587 | -0.22585 | 0.823746 | 0.884749 | -6.46524 |
| FEM1A     | -0.032   | 0.222319 | -0.26582 | 0.793117 | 0.86182  | -6.46525 |
| USP43     | 0.068494 | 0.155371 | 0.225386 | 0.824103 | 0.884939 | -6.46535 |
| SH3TC1    | 0.073659 | 0.270508 | 0.265375 | 0.793455 | 0.862092 | -6.46537 |
| C8orf51   | -0.04653 | -0.05031 | -0.16698 | 0.869264 | 0.918187 | -6.46541 |
| NLRP13    | 0.084129 | -0.34373 | 0.224933 | 0.82445  | 0.885263 | -6.46545 |
| TOP2B     | 0.05378  | -0.15879 | 0.265074 | 0.793684 | 0.862245 | -6.46545 |
| UGGT2     | 0.059379 | 0.090831 | 0.264349 | 0.794234 | 0.862686 | -6.46565 |
| DNAJC28   | -0.08526 | 0.022022 | -0.26424 | 0.794314 | 0.862686 | -6.46568 |
| LOC64543: | -0.11772 | 0.336708 | -0.26423 | 0.794324 | 0.862686 | -6.46568 |
| AGAP8     | -0.06492 | 0.214095 | -0.26419 | 0.794355 | 0.862686 | -6.46569 |
| NUSAP1    | -0.07815 | -0.39582 | -0.26413 | 0.794398 | 0.862686 | -6.46571 |
| LOC44043: | -0.07721 | -0.16174 | -0.26376 | 0.794685 | 0.86295  | -6.46581 |
| ZNF771    | -0.07428 | 0.405117 | -0.2636  | 0.794806 | 0.863033 | -6.46585 |
| FKBP4     | 0.169867 | 0.738212 | 0.263184 | 0.79512  | 0.863294 | -6.46597 |
| LOC28345: | 0.137951 | 0.531466 | 0.263157 | 0.79514  | 0.863294 | -6.46597 |
| UQCRB     | -0.12174 | -0.69693 | -0.26274 | 0.795458 | 0.863549 | -6.46609 |
| MAF1      | -0.07751 | 0.484593 | -0.26266 | 0.795516 | 0.863553 | -6.46611 |
| XAGE2B    | 0.085309 | -0.1609  | 0.262568 | 0.795588 | 0.863553 | -6.46613 |
| SERPINB13 | -0.10252 | 0.087271 | -0.26256 | 0.795594 | 0.863553 | -6.46613 |
| CNOT10    | -0.03663 | 0.266316 | -0.26237 | 0.795736 | 0.863632 | -6.46618 |
| GPR83     | -0.0468  | -0.00563 | -0.22164 | 0.826975 | 0.887147 | -6.46621 |
| PFKM      | 0.061053 | 0.1576   | 0.262245 | 0.795832 | 0.863632 | -6.46622 |
| CDON      | -0.08745 | -0.06849 | -0.26219 | 0.795875 | 0.863632 | -6.46623 |
| DCAF7     | -0.05294 | 0.086486 | -0.26218 | 0.79588  | 0.863632 | -6.46623 |
| LOC40158: | 0.064624 | -0.517   | 0.261597 | 0.796326 | 0.864013 | -6.46639 |
| ADCK2     | -0.06153 | 0.382372 | -0.26131 | 0.796545 | 0.864202 | -6.46647 |
| COL8A2    | 0.063877 | 0.127137 | 0.220368 | 0.827952 | 0.887952 | -6.4665  |
| KIAA0889  | 0.038807 | 0.003982 | 0.260923 | 0.796838 | 0.864461 | -6.46657 |
| FSD1      | -0.07217 | 0.297574 | -0.26088 | 0.796871 | 0.864461 | -6.46658 |
| CCNJL     | -0.10032 | 0.341123 | -0.26077 | 0.796955 | 0.864504 | -6.46661 |
| SIM2      | -0.07434 | 0.143742 | -0.21981 | 0.828383 | 0.888143 | -6.46662 |
| PROM1     | -0.09653 | -0.17395 | -0.2198  | 0.828384 | 0.888143 | -6.46662 |
| DCAF15    | -0.05248 | 0.317036 | -0.26053 | 0.797139 | 0.864655 | -6.46668 |
| S1PR1     | 0.084289 | -0.64805 | 0.26047  | 0.797182 | 0.864655 | -6.46669 |
| LOC64340: | 0.01946  | -0.00432 | 0.159279 | 0.875236 | 0.922754 | -6.46671 |
| MAPKAPK5  | 0.078212 | -0.01394 | 0.260162 | 0.797416 | 0.864861 | -6.46677 |



|           |          |          |          |          |          |          |
|-----------|----------|----------|----------|----------|----------|----------|
| ID3       | -0.08649 | 0.368033 | -0.26009 | 0.797471 | 0.864873 | -6.46679 |
| OR4S1     | 0.067813 | 0.002608 | 0.259864 | 0.797643 | 0.864991 | -6.46685 |
| FAM70B    | 0.065573 | -0.19773 | 0.25983  | 0.797668 | 0.864991 | -6.46686 |
| GPX8      | 0.049166 | 0.063645 | 0.259427 | 0.797976 | 0.865276 | -6.46697 |
| LOC100501 | 0.075884 | 0.169471 | 0.217997 | 0.829772 | 0.889314 | -6.46703 |
| MGC12916  | 0.061453 | 0.073526 | 0.217657 | 0.830033 | 0.889406 | -6.4671  |
| ANKRD36B  | 0.077407 | -0.16728 | 0.21725  | 0.830346 | 0.889692 | -6.4672  |
| LOC65306  | -0.08706 | -0.41404 | -0.25854 | 0.798648 | 0.865861 | -6.4672  |
| RGS1      | -0.07048 | -0.06174 | -0.15547 | 0.878191 | 0.925272 | -6.46732 |
| RBM25     | -0.08725 | 0.327823 | -0.25804 | 0.799028 | 0.866178 | -6.46734 |
| UTS2D     | 0.08015  | -0.17527 | 0.257978 | 0.799077 | 0.866183 | -6.46735 |
| APLNR     | 0.044604 | -0.11463 | 0.257624 | 0.799347 | 0.866427 | -6.46745 |
| USP2      | 0.031835 | -0.27944 | 0.154523 | 0.87893  | 0.925602 | -6.46748 |
| ELFN2     | 0.039405 | -0.08877 | 0.257489 | 0.79945  | 0.866445 | -6.46748 |
| PRRG2     | -0.04143 | 0.252555 | -0.25732 | 0.799577 | 0.866532 | -6.46753 |
| SECISBP2  | -0.04259 | 0.025747 | -0.25713 | 0.799725 | 0.866549 | -6.46758 |
| RPL26     | -0.14245 | -0.43965 | -0.25705 | 0.799783 | 0.866564 | -6.4676  |
| SLC32A1   | -0.04684 | -0.18343 | -0.21533 | 0.831824 | 0.890691 | -6.46762 |
| FAM198B   | 0.078013 | -0.64376 | 0.256788 | 0.799983 | 0.866733 | -6.46767 |
| IL33      | 0.042025 | -0.01734 | 0.256618 | 0.800113 | 0.866826 | -6.46771 |
| ATP13A5   | 0.062832 | 0.118065 | 0.214153 | 0.832726 | 0.891413 | -6.46788 |
| LOC389906 | 0.085085 | 0.251695 | 0.255572 | 0.800909 | 0.867593 | -6.46799 |
| PRPH2     | -0.05549 | 0.016195 | -0.21349 | 0.833236 | 0.891859 | -6.46803 |
| GRAMD1C   | 0.074433 | 0.048424 | 0.255276 | 0.801134 | 0.867789 | -6.46806 |
| KRT28     | -0.0419  | 0.079515 | -0.25468 | 0.801592 | 0.868174 | -6.46822 |
| WNT8A     | 0.060845 | -0.04112 | 0.254648 | 0.801613 | 0.868174 | -6.46823 |
| ZNF608    | -0.14389 | 0.627542 | -0.25458 | 0.801666 | 0.868174 | -6.46825 |
| LYPD6     | -0.0154  | -0.00567 | -0.25433 | 0.801856 | 0.86833  | -6.46831 |
| ACAD11    | -0.04904 | 0.010324 | -0.21181 | 0.834529 | 0.89271  | -6.46839 |
| PANX1     | -0.06662 | 0.287068 | -0.25396 | 0.802138 | 0.86854  | -6.46841 |
| MRPL43    | -0.13878 | 0.500932 | -0.25381 | 0.80225  | 0.868593 | -6.46845 |
| MGAT3     | 0.120146 | 0.574685 | 0.253769 | 0.802282 | 0.868593 | -6.46846 |
| PGBD3     | 0.056681 | -0.06686 | 0.253719 | 0.80232  | 0.868593 | -6.46847 |
| MAP3K15   | 0.047834 | 0.007406 | 0.253335 | 0.802613 | 0.868831 | -6.46857 |
| Mar-02    | -0.05681 | 0.288846 | -0.25331 | 0.802629 | 0.868831 | -6.46857 |
| ACOT13    | -0.12037 | 0.427139 | -0.25319 | 0.802722 | 0.868853 | -6.46861 |
| RHOJ      | 0.074007 | -0.08551 | 0.253171 | 0.802738 | 0.868853 | -6.46861 |
| CALCA     | -0.05808 | -0.1489  | -0.25284 | 0.802988 | 0.869075 | -6.4687  |
| PTGER4    | -0.08854 | 0.084864 | -0.25262 | 0.803161 | 0.869214 | -6.46876 |
| OAS3      | 0.166704 | 0.29104  | 0.252542 | 0.803217 | 0.869228 | -6.46877 |
| AMHR2     | -0.15683 | 0.02149  | -0.25247 | 0.803269 | 0.869236 | -6.46879 |
| ASGR2     | -0.07826 | 0.086965 | -0.25199 | 0.803635 | 0.869536 | -6.46892 |
| LDHAL6A   | -0.0425  | 0.079506 | -0.20938 | 0.836396 | 0.894024 | -6.46892 |
| AK7       | 0.05799  | -0.37625 | 0.208835 | 0.836816 | 0.894374 | -6.46904 |
| LOC100133 | -0.04361 | -0.12886 | -0.25087 | 0.804488 | 0.870363 | -6.4692  |
| UNC45A    | 0.042814 | -0.03312 | 0.250554 | 0.804732 | 0.870578 | -6.46929 |
| C22orf33  | 0.054757 | -0.1317  | 0.250312 | 0.804916 | 0.87073  | -6.46935 |

|           |          |          |          |          |          |          |
|-----------|----------|----------|----------|----------|----------|----------|
| NR1I3     | -0.05259 | 0.125331 | -0.24973 | 0.805362 | 0.871164 | -6.4695  |
| NFASC     | 0.069673 | 0.007137 | 0.249327 | 0.805668 | 0.871446 | -6.4696  |
| FAM184B   | -0.07295 | 0.146962 | -0.20609 | 0.838931 | 0.895882 | -6.46962 |
| LOC415056 | -0.06248 | -0.29379 | -0.24914 | 0.805813 | 0.871507 | -6.46965 |
| Sep-02    | 0.091942 | 0.220066 | 0.249027 | 0.805896 | 0.87155  | -6.46968 |
| ZNF547    | 0.040502 | 0.003443 | 0.139069 | 0.890951 | 0.934545 | -6.46981 |
| BCOR      | -0.04138 | 0.037324 | -0.24838 | 0.806388 | 0.872033 | -6.46984 |
| ANKFY1    | -0.07056 | 0.237337 | -0.2483  | 0.806452 | 0.872055 | -6.46986 |
| FAM208B   | 0.064463 | -0.27594 | 0.204745 | 0.839964 | 0.896712 | -6.4699  |
| FCHO1     | -0.05498 | 0.29151  | -0.24802 | 0.806667 | 0.872132 | -6.46993 |
| SSNA1     | -0.03224 | -0.00242 | -0.24797 | 0.806702 | 0.872132 | -6.46995 |
| ADH7      | 0.017656 | -0.0238  | 0.247481 | 0.807076 | 0.872488 | -6.47007 |
| FLJ40536  | -0.02258 | -0.03936 | -0.13713 | 0.892458 | 0.935725 | -6.47009 |
| CNR2      | -0.05805 | 0.418233 | -0.2474  | 0.807138 | 0.872507 | -6.47009 |
| NR1H3     | -0.05223 | 0.193808 | -0.24723 | 0.807267 | 0.872598 | -6.47013 |
| HSCB      | -0.0581  | 0.144772 | -0.13645 | 0.892995 | 0.936137 | -6.47019 |
| SHQ1      | 0.042048 | -0.12648 | 0.246998 | 0.807445 | 0.87265  | -6.47019 |
| C10orf25  | -0.04018 | -0.03605 | -0.24698 | 0.807456 | 0.87265  | -6.4702  |
| FAM153B   | 0.100609 | -0.40203 | 0.246934 | 0.807493 | 0.87265  | -6.47021 |
| TKT       | -0.06061 | 0.056796 | -0.24668 | 0.80769  | 0.872766 | -6.47027 |
| MMP26     | -0.0644  | -0.01213 | -0.24643 | 0.807874 | 0.872918 | -6.47033 |
| LOC100288 | -0.04583 | -0.2819  | -0.24624 | 0.808025 | 0.873032 | -6.47038 |
| ROCK2     | 0.074367 | -0.14759 | 0.24559  | 0.808519 | 0.87347  | -6.47055 |
| YWHAG     | 0.034259 | -0.20564 | 0.245462 | 0.808617 | 0.873527 | -6.47058 |
| RHOH      | 0.064733 | -0.18095 | 0.244909 | 0.809039 | 0.873935 | -6.47072 |
| PPP1R36   | -0.07146 | -0.17407 | -0.24439 | 0.809434 | 0.874265 | -6.47085 |
| FAM123A   | 0.040228 | -0.32544 | 0.244321 | 0.809488 | 0.874276 | -6.47087 |
| SLC38A9   | -0.03848 | -0.43313 | -0.2442  | 0.809578 | 0.874276 | -6.47089 |
| PANX3     | -0.04267 | -0.14878 | -0.24395 | 0.809768 | 0.874404 | -6.47096 |
| NGFR      | 0.067546 | 0.11008  | 0.243931 | 0.809786 | 0.874404 | -6.47096 |
| IFI6      | -0.14797 | 0.296982 | -0.24383 | 0.809866 | 0.874437 | -6.47099 |
| DOLPP1    | -0.05591 | 0.235646 | -0.24377 | 0.809905 | 0.874437 | -6.471   |
| HOMER3    | 0.079644 | 0.188478 | 0.243633 | 0.810013 | 0.874472 | -6.47104 |
| MBLAC2    | 0.072054 | 0.171724 | 0.243615 | 0.810027 | 0.874472 | -6.47104 |
| CCDC85C   | -0.04576 | 0.274082 | -0.24324 | 0.81031  | 0.87473  | -6.47113 |
| PCDHA8    | 0.051278 | -0.36709 | 0.242869 | 0.810597 | 0.874943 | -6.47123 |
| ZNF182    | 0.030301 | -0.20798 | 0.24259  | 0.81081  | 0.875125 | -6.4713  |
| KIR2DL5A  | -0.1379  | 0.694238 | -0.19794 | 0.845211 | 0.900841 | -6.47131 |
| RPLP0P2   | 0.076074 | -0.31315 | 0.242436 | 0.810928 | 0.875203 | -6.47134 |
| EIF2C1    | 0.046207 | -0.05371 | 0.24211  | 0.811177 | 0.875424 | -6.47142 |
| RPS3A     | -0.20783 | -0.95677 | -0.24204 | 0.811227 | 0.87543  | -6.47143 |
| KCNJ1     | 0.04371  | -0.0826  | 0.241417 | 0.811706 | 0.875851 | -6.47159 |
| TRIB1     | 0.109114 | 0.216437 | 0.241351 | 0.811757 | 0.875857 | -6.4716  |
| PKD2L1    | 0.093511 | 0.292757 | 0.196238 | 0.846522 | 0.90165  | -6.47166 |
| TMEM44    | 0.060215 | 0.43314  | 0.241128 | 0.811927 | 0.875993 | -6.47166 |
| LOC343055 | 0.067167 | 0.050243 | 0.241053 | 0.811984 | 0.876006 | -6.47168 |
| DDX19B    | 0.026465 | -0.00244 | 0.240666 | 0.812281 | 0.876277 | -6.47177 |

|           |          |          |          |          |          |          |
|-----------|----------|----------|----------|----------|----------|----------|
| QPRT      | 0.061106 | 0.20399  | 0.24007  | 0.812736 | 0.87672  | -6.47192 |
| LOC28600: | 0.09081  | -0.27098 | 0.239906 | 0.812861 | 0.876779 | -6.47196 |
| ILF3      | 0.054375 | 0.214679 | 0.239871 | 0.812888 | 0.876779 | -6.47197 |
| TRIM44    | -0.05564 | 0.097109 | -0.23982 | 0.812925 | 0.876779 | -6.47198 |
| SOX4      | -0.0524  | 0.185261 | -0.23961 | 0.81309  | 0.876909 | -6.47203 |
| C4BPB     | -0.06805 | -0.01715 | -0.23931 | 0.813318 | 0.877107 | -6.47211 |
| COX7B2    | -0.04353 | 0.057183 | -0.1939  | 0.848328 | 0.902838 | -6.47213 |
| LMBR1L    | 0.027109 | 0.03798  | 0.239167 | 0.813426 | 0.877163 | -6.47214 |
| CLMN      | -0.07762 | 0.349561 | -0.23893 | 0.81361  | 0.87726  | -6.4722  |
| C4BPA     | -0.10864 | 0.06018  | -0.23889 | 0.813639 | 0.87726  | -6.47221 |
| BSND      | 0.025657 | -0.30447 | 0.120634 | 0.905327 | 0.94476  | -6.47228 |
| GDE1      | -0.08789 | 0.373258 | -0.23859 | 0.813866 | 0.877408 | -6.47228 |
| CROCCP3   | -0.02438 | -0.03661 | -0.23838 | 0.814027 | 0.877465 | -6.47233 |
| TTC18     | -0.05339 | -0.22124 | -0.19281 | 0.84917  | 0.903538 | -6.47234 |
| ANKUB1    | -0.02527 | -0.30967 | -0.11983 | 0.905956 | 0.945184 | -6.47238 |
| DNM3OS    | 0.021372 | -0.24318 | 0.119061 | 0.906556 | 0.945648 | -6.47247 |
| MIS18BP1  | -0.05551 | -0.15344 | -0.19204 | 0.849764 | 0.903875 | -6.47249 |
| MYZAP     | -0.09879 | 0.622251 | -0.19148 | 0.850199 | 0.904057 | -6.47261 |
| KCTD15    | -0.12952 | 0.462953 | -0.23676 | 0.815269 | 0.878582 | -6.47273 |
| RBPMS     | -0.07964 | -0.00845 | -0.2367  | 0.815313 | 0.878582 | -6.47274 |
| RERE      | 0.122683 | 0.422223 | 0.236524 | 0.815448 | 0.878678 | -6.47279 |
| METAP1D   | -0.08555 | 0.151636 | -0.23631 | 0.815612 | 0.878806 | -6.47284 |
| FLJ31713  | 0.018622 | -0.26258 | 0.115756 | 0.909137 | 0.947281 | -6.47287 |
| ATP1B3    | -0.03991 | -0.02757 | -0.2361  | 0.815771 | 0.878882 | -6.47289 |
| C7orf10   | 0.05147  | -0.02251 | 0.235888 | 0.815935 | 0.878961 | -6.47294 |
| LOC10050: | -0.03479 | -0.11093 | -0.23574 | 0.81605  | 0.879037 | -6.47298 |
| PIDD      | -0.04483 | 0.254319 | -0.23505 | 0.816574 | 0.879553 | -6.47314 |
| TAC1      | 0.043996 | -0.27119 | 0.234706 | 0.816839 | 0.87979  | -6.47322 |
| IPMK      | 0.071732 | 0.016194 | 0.234503 | 0.816995 | 0.879909 | -6.47327 |
| C5orf58   | -0.03849 | -0.20619 | -0.18761 | 0.853184 | 0.906185 | -6.47336 |
| MIPEP     | 0.099451 | -0.23689 | 0.233956 | 0.817413 | 0.880264 | -6.4734  |
| LOC10065: | -0.04935 | 0.148404 | -0.23385 | 0.817494 | 0.8803   | -6.47343 |
| MAVS      | -0.04704 | 0.074039 | -0.2336  | 0.817686 | 0.880412 | -6.47349 |
| CARD18    | -0.05286 | 0.101256 | -0.18661 | 0.853958 | 0.90676  | -6.47355 |
| FZR1      | -0.03907 | 0.184955 | -0.23332 | 0.817898 | 0.880559 | -6.47356 |
| LOC72985: | -0.09371 | 0.141939 | -0.2333  | 0.817912 | 0.880559 | -6.47356 |
| CARTPT    | 0.054049 | -0.05252 | 0.186341 | 0.854167 | 0.906819 | -6.4736  |
| ZNF543    | 0.034517 | -0.05198 | 0.233022 | 0.818129 | 0.880742 | -6.47363 |
| MGC16075  | -0.04942 | 0.068138 | -0.23297 | 0.818172 | 0.880742 | -6.47364 |
| FBP1      | 0.05528  | 0.259757 | 0.232733 | 0.81835  | 0.880885 | -6.4737  |
| GUF1      | 0.050087 | 0.130059 | 0.1854   | 0.854894 | 0.90746  | -6.47378 |
| PNPT1     | -0.09315 | -0.02238 | -0.23229 | 0.818687 | 0.881199 | -6.4738  |
| CPA2      | -0.01947 | -0.00961 | -0.1851  | 0.855128 | 0.907561 | -6.47384 |
| ATP8B2    | -0.0531  | 0.117121 | -0.23209 | 0.818842 | 0.881318 | -6.47385 |
| PTDSS2    | -0.12211 | 0.127689 | -0.23203 | 0.818891 | 0.881322 | -6.47386 |
| FAM3D     | 0.0753   | -0.05041 | 0.231584 | 0.81923  | 0.881638 | -6.47397 |
| LOC64380: | -0.04429 | 0.419328 | -0.1061  | 0.916685 | 0.952563 | -6.47398 |

|           |          |          |          |          |          |          |
|-----------|----------|----------|----------|----------|----------|----------|
| FXVD6     | 0.075368 | 0.230987 | 0.231362 | 0.8194   | 0.881766 | -6.47402 |
| CPNE8     | -0.13372 | 0.386054 | -0.23126 | 0.819478 | 0.881766 | -6.47405 |
| C1orf150  | 0.035861 | 0.033359 | 0.231253 | 0.819483 | 0.881766 | -6.47405 |
| ITPK1     | -0.10458 | 0.763214 | -0.23117 | 0.81955  | 0.88177  | -6.47407 |
| DDX54     | 0.072027 | 0.188901 | 0.23096  | 0.819708 | 0.881814 | -6.47412 |
| PRG2      | -0.15114 | 0.377094 | -0.23057 | 0.820008 | 0.882088 | -6.47421 |
| STAB1     | -0.09816 | 0.411348 | -0.23049 | 0.820068 | 0.882104 | -6.47423 |
| ENOX1     | -0.08406 | 0.378566 | -0.18283 | 0.85688  | 0.908828 | -6.47427 |
| KAZALD1   | 0.075048 | 0.070989 | 0.230256 | 0.820247 | 0.882249 | -6.47428 |
| ZFP57     | 0.102752 | 0.589765 | 0.230088 | 0.820376 | 0.882339 | -6.47432 |
| UBE2I     | -0.04613 | 0.10856  | -0.22987 | 0.820543 | 0.882359 | -6.47437 |
| RFX7      | -0.04014 | 0.011078 | -0.22985 | 0.820558 | 0.882359 | -6.47438 |
| PRR16     | -0.08809 | 0.47252  | -0.18213 | 0.85742  | 0.909254 | -6.4744  |
| CD79A     | -0.10123 | 0.460171 | -0.22976 | 0.820631 | 0.882359 | -6.4744  |
| IFLTD1    | -0.05472 | 0.068515 | -0.22975 | 0.820636 | 0.882359 | -6.4744  |
| POLDIP2   | 0.034236 | 0.000251 | 0.229723 | 0.820656 | 0.882359 | -6.47441 |
| TMEM31    | -0.05829 | 0.055424 | -0.22949 | 0.820835 | 0.882494 | -6.47446 |
| EIF4A3    | 0.031752 | -0.00213 | 0.229215 | 0.821046 | 0.882594 | -6.47453 |
| SELRC1    | 0.039999 | -0.29255 | 0.229189 | 0.821065 | 0.882594 | -6.47453 |
| MAPRE2    | 0.048175 | 0.021028 | 0.229148 | 0.821096 | 0.882594 | -6.47454 |
| NUP188    | -0.07445 | 0.442598 | -0.22913 | 0.821109 | 0.882594 | -6.47455 |
| THG1L     | 0.037883 | 0.297367 | 0.228941 | 0.821255 | 0.882703 | -6.47459 |
| LOC40075  | 0.025694 | -0.26783 | 0.180884 | 0.858388 | 0.909935 | -6.47463 |
| TROAP     | 0.05098  | -0.24129 | 0.228657 | 0.821473 | 0.882888 | -6.47466 |
| KCNA5     | 0.031382 | -0.09662 | 0.227998 | 0.821978 | 0.883334 | -6.47481 |
| PRSS35    | -0.0449  | 0.148857 | -0.2277  | 0.822204 | 0.883529 | -6.47488 |
| HOXC11    | 0.028436 | -0.24286 | 0.097476 | 0.923434 | 0.957089 | -6.47488 |
| BET1L     | 0.021785 | 0.101175 | 0.227476 | 0.822379 | 0.883668 | -6.47494 |
| SLC2A11   | 0.028032 | 0.067345 | 0.09627  | 0.924378 | 0.957794 | -6.475   |
| COX6C     | 0.095577 | -0.89828 | 0.227026 | 0.822724 | 0.883991 | -6.47504 |
| MBTPS2    | 0.016417 | -0.02386 | 0.226912 | 0.822811 | 0.884014 | -6.47507 |
| NUP155    | 0.04493  | -0.23515 | 0.22688  | 0.822836 | 0.884014 | -6.47507 |
| ARMC3     | 0.070474 | -0.09886 | 0.226351 | 0.823241 | 0.884352 | -6.4752  |
| MGC16142  | -0.01666 | -0.13952 | -0.09415 | 0.926038 | 0.958965 | -6.47521 |
| CLDN15    | 0.046053 | 0.062349 | 0.226072 | 0.823455 | 0.884508 | -6.47526 |
| PWP1      | -0.05055 | 0.046871 | -0.22605 | 0.823476 | 0.884508 | -6.47527 |
| LIX1      | 0.030359 | -0.05099 | 0.225511 | 0.823885 | 0.88485  | -6.47539 |
| CLDND1    | -0.05776 | -0.48498 | -0.22538 | 0.823986 | 0.884902 | -6.47542 |
| TMEM14B   | -0.04881 | -0.49892 | -0.22533 | 0.824023 | 0.884902 | -6.47543 |
| ACTN2     | 0.050359 | -0.06527 | 0.175997 | 0.862171 | 0.912811 | -6.47553 |
| CCDC85A   | 0.015222 | -0.00311 | 0.224508 | 0.824655 | 0.885434 | -6.47562 |
| ZNF584    | 0.036103 | 0.059494 | 0.224225 | 0.824873 | 0.885619 | -6.47569 |
| CPM       | 0.049728 | 0.329508 | 0.174595 | 0.863258 | 0.913714 | -6.47578 |
| MGAT5     | -0.04494 | -0.22924 | -0.2238  | 0.825197 | 0.885871 | -6.47578 |
| RNF126    | -0.05443 | 0.087656 | -0.22362 | 0.825333 | 0.885968 | -6.47583 |
| LOC10013  | 0.03325  | -0.00759 | 0.223495 | 0.825432 | 0.885987 | -6.47585 |
| LOC100129 | 0.068858 | 0.107607 | 0.223117 | 0.825723 | 0.886219 | -6.47594 |

|           |          |          |          |          |          |          |
|-----------|----------|----------|----------|----------|----------|----------|
| FAM150B   | 0.082839 | 0.170158 | 0.223071 | 0.825758 | 0.886219 | -6.47595 |
| GPX6      | -0.05088 | -0.03578 | -0.17358 | 0.864047 | 0.914203 | -6.47596 |
| ABCC8     | 0.029634 | -0.00148 | 0.223026 | 0.825792 | 0.886219 | -6.47596 |
| PMF1      | 0.031911 | 0.032256 | 0.222575 | 0.826138 | 0.886493 | -6.47607 |
| P2RY2     | 0.062969 | -0.05996 | 0.222415 | 0.826262 | 0.886576 | -6.4761  |
| GPRIN3    | 0.05621  | -0.22849 | 0.172748 | 0.864689 | 0.914497 | -6.47611 |
| IL19      | 0.043917 | -0.10404 | 0.222288 | 0.826359 | 0.886633 | -6.47613 |
| PDE6A     | -0.05056 | -0.32373 | -0.22196 | 0.826609 | 0.886852 | -6.4762  |
| TARSL2    | 0.073356 | 0.022232 | 0.221533 | 0.826939 | 0.887147 | -6.4763  |
| CD1A      | -0.07094 | 0.159185 | -0.22132 | 0.827105 | 0.887239 | -6.47635 |
| FKBP9L    | -0.03338 | 0.075375 | -0.17134 | 0.865779 | 0.915393 | -6.47636 |
| SPINT2    | 0.033061 | -0.0875  | 0.220939 | 0.827395 | 0.887497 | -6.47644 |
| DNM1      | -0.05311 | 0.351569 | -0.22089 | 0.827436 | 0.887497 | -6.47645 |
| LEPROT    | 0.092249 | -0.61619 | 0.220623 | 0.827638 | 0.887664 | -6.47651 |
| PPP1R26   | 0.062499 | 0.416314 | 0.219949 | 0.828155 | 0.888122 | -6.47666 |
| DNAJC16   | 0.038215 | -0.58793 | 0.219874 | 0.828213 | 0.888135 | -6.47668 |
| MAP2      | 0.043964 | 0.018362 | 0.219767 | 0.828295 | 0.888143 | -6.4767  |
| YDJC      | 0.051091 | 0.133669 | 0.219629 | 0.828402 | 0.888143 | -6.47673 |
| C12orf12  | -0.01765 | -0.03211 | -0.16889 | 0.86768  | 0.91686  | -6.47679 |
| MAGEB1    | 0.02959  | 0.006712 | 0.219343 | 0.828621 | 0.88833  | -6.4768  |
| SCARA5    | 0.063904 | -0.40465 | 0.219003 | 0.828882 | 0.888561 | -6.47687 |
| DUSP19    | 0.106572 | -0.09863 | 0.218374 | 0.829365 | 0.88903  | -6.47701 |
| RPL14     | 0.062976 | 0.31754  | 0.218044 | 0.829619 | 0.889254 | -6.47709 |
| NCOA2     | 0.061001 | -0.35552 | 0.217912 | 0.829721 | 0.889314 | -6.47712 |
| SMARCA5   | 0.070556 | -0.43066 | 0.217794 | 0.829811 | 0.889314 | -6.47714 |
| MYH7B     | -0.01325 | 0.023262 | -0.07149 | 0.943804 | 0.971316 | -6.47715 |
| ZNF835    | 0.051945 | -0.0083  | 0.217706 | 0.829879 | 0.889338 | -6.47716 |
| ZNF644    | 0.09785  | -0.20864 | 0.217587 | 0.82997  | 0.889387 | -6.47719 |
| RYR3      | 0.078991 | 0.182933 | 0.166359 | 0.869644 | 0.91844  | -6.47722 |
| PADI3     | 0.041915 | -0.09871 | 0.21692  | 0.830483 | 0.88979  | -6.47734 |
| FLJ38379  | 0.029541 | -0.23533 | 0.068618 | 0.946056 | 0.972919 | -6.47736 |
| PCDH10    | -0.03046 | 0.059051 | -0.21665 | 0.830689 | 0.889962 | -6.4774  |
| LOC100501 | 0.046815 | -0.41254 | 0.216398 | 0.830884 | 0.890074 | -6.47745 |
| OXCT1     | -0.07669 | 0.00708  | -0.21612 | 0.831097 | 0.890217 | -6.47752 |
| PHIP      | 0.079759 | 0.185413 | 0.216047 | 0.831154 | 0.890217 | -6.47753 |
| LOC100501 | -0.00397 | 0.000882 | -0.06507 | 0.948843 | 0.974915 | -6.4776  |
| HIST1H2AC | -0.03887 | 0.138225 | -0.21549 | 0.831585 | 0.890588 | -6.47766 |
| FBRSL1    | -0.05052 | 0.133995 | -0.21548 | 0.831591 | 0.890588 | -6.47766 |
| HOXB1     | 0.040385 | -0.19994 | 0.163619 | 0.871771 | 0.920091 | -6.47769 |
| MARK3     | 0.040521 | -0.07987 | 0.215232 | 0.831781 | 0.890691 | -6.47771 |
| EARS2     | -0.06922 | 0.375212 | -0.21488 | 0.83205  | 0.890884 | -6.47779 |
| ZNF366    | -0.03218 | 0.119652 | -0.06184 | 0.951378 | 0.976547 | -6.47781 |
| LOC100501 | 0.111196 | 0.410471 | 0.214625 | 0.832247 | 0.891047 | -6.47785 |
| FLJ25694  | -0.04399 | -0.17403 | -0.21454 | 0.83231  | 0.891065 | -6.47786 |
| SH3BGR    | -0.01171 | -0.12918 | -0.06006 | 0.952773 | 0.977109 | -6.47792 |
| KLF3      | -0.05811 | -0.25978 | -0.21415 | 0.832616 | 0.891344 | -6.47795 |
| SLC4A11   | 0.049687 | 0.233168 | 0.213726 | 0.832939 | 0.891593 | -6.47804 |

|          |          |          |          |          |          |          |
|----------|----------|----------|----------|----------|----------|----------|
| AKR1E2   | 0.02939  | -0.00186 | 0.213284 | 0.833279 | 0.891859 | -6.47814 |
| RGS22    | 0.063956 | -0.06604 | 0.160902 | 0.873881 | 0.921722 | -6.47814 |
| GK2      | 0.011373 | -0.14076 | 0.056356 | 0.955684 | 0.979171 | -6.47815 |
| DNTT     | 0.015045 | -0.00871 | 0.212894 | 0.833579 | 0.892111 | -6.47822 |
| METTL12  | 0.054235 | 0.075824 | 0.21286  | 0.833605 | 0.892111 | -6.47823 |
| LOC64365 | 0.02875  | -0.04968 | 0.21247  | 0.833905 | 0.892335 | -6.47832 |
| SLC7A1   | 0.04573  | -0.05091 | 0.212404 | 0.833956 | 0.89234  | -6.47833 |
| HSPE1    | 0.061115 | 0.088417 | 0.212188 | 0.834122 | 0.892469 | -6.47838 |
| CNTFR    | 0.053032 | -0.15833 | 0.211974 | 0.834287 | 0.892589 | -6.47843 |
| CLDN22   | 0.0775   | 0.162693 | 0.211924 | 0.834325 | 0.892589 | -6.47844 |
| GDPD5    | 0.079238 | 0.514909 | 0.21183  | 0.834398 | 0.892618 | -6.47846 |
| GTPBP3   | -0.04972 | 0.307493 | -0.21157 | 0.8346   | 0.892736 | -6.47851 |
| TRIML1   | -0.00773 | -0.01811 | -0.04927 | 0.961248 | 0.98297  | -6.47853 |
| TXNL1    | -0.03296 | 0.038359 | -0.21116 | 0.834913 | 0.893023 | -6.4786  |
| C12orf66 | 0.068783 | -0.13377 | 0.210725 | 0.835249 | 0.89329  | -6.4787  |
| WASH2P   | 0.035946 | 0.018039 | 0.210718 | 0.835254 | 0.89329  | -6.4787  |
| CLEC18A  | 0.012659 | 0.215105 | 0.045095 | 0.964532 | 0.985088 | -6.47873 |
| LOC40131 | -0.03152 | -0.00922 | -0.2105  | 0.835421 | 0.89342  | -6.47874 |
| ZNF14    | -0.04357 | -0.28665 | -0.15704 | 0.876879 | 0.924088 | -6.47877 |
| FGFBP1   | 0.038475 | 0.066985 | 0.210347 | 0.83554  | 0.893498 | -6.47878 |
| ZMYND10  | -0.028   | 0.23464  | -0.21023 | 0.835633 | 0.893549 | -6.4788  |
| F5       | -0.10791 | -0.00641 | -0.21005 | 0.83577  | 0.893636 | -6.47884 |
| DAPK1    | 0.084701 | 0.292756 | 0.210001 | 0.835806 | 0.893636 | -6.47885 |
| OR2F1    | 0.006625 | -0.23396 | 0.04201  | 0.966957 | 0.986902 | -6.47887 |
| DEFB105B | -0.03619 | -0.11577 | -0.20977 | 0.835983 | 0.893777 | -6.4789  |
| PER3     | 0.034035 | -0.12395 | 0.209595 | 0.836119 | 0.893853 | -6.47894 |
| PROKR2   | 0.039271 | -0.11061 | 0.20956  | 0.836146 | 0.893853 | -6.47895 |
| MRPL23   | 0.042069 | -0.02038 | 0.209437 | 0.83624  | 0.893905 | -6.47897 |
| AKR7A2P1 | -0.03341 | 0.063857 | -0.15509 | 0.878398 | 0.925352 | -6.47908 |
| OR8B8    | 0.044139 | -0.20947 | 0.208838 | 0.836701 | 0.894301 | -6.4791  |
| SMR3B    | -0.01145 | -0.07955 | -0.03511 | 0.972378 | 0.990526 | -6.47915 |
| TRAIP    | 0.052398 | -0.02358 | 0.208565 | 0.836912 | 0.894428 | -6.47916 |
| UTP14C   | 0.009219 | 0.038144 | 0.033789 | 0.97342  | 0.991278 | -6.47919 |
| SUSD5    | -0.0101  | -0.00766 | -0.03171 | 0.975057 | 0.992378 | -6.47926 |
| RPS7     | 0.153906 | -1.08027 | 0.207797 | 0.837503 | 0.894963 | -6.47932 |
| DMPK     | -0.03624 | 0.399849 | -0.20748 | 0.837748 | 0.89517  | -6.47939 |
| C11orf24 | 0.047285 | 0.124664 | 0.207426 | 0.837788 | 0.89517  | -6.4794  |
| PARD6A   | -0.03765 | 0.318052 | -0.20723 | 0.837939 | 0.895218 | -6.47944 |
| KIF16B   | 0.05786  | -0.00336 | 0.207224 | 0.837944 | 0.895218 | -6.47945 |
| C19orf20 | -0.04198 | 0.164814 | -0.2071  | 0.838044 | 0.895218 | -6.47947 |
| FRS3     | 0.035251 | -0.20863 | 0.207055 | 0.838075 | 0.895218 | -6.47948 |
| MZT2A    | -0.05601 | 0.30686  | -0.20701 | 0.838107 | 0.895218 | -6.47949 |
| GPR114   | -0.06686 | 0.411835 | -0.20695 | 0.838156 | 0.895221 | -6.4795  |
| RALGAPA1 | 0.054136 | 0.009414 | 0.206567 | 0.838451 | 0.895487 | -6.47958 |
| SAMD13   | -0.00375 | 0.156683 | -0.01247 | 0.990192 | 1        | -6.4797  |
| ZBTB11   | 0.027167 | -0.13673 | 0.205991 | 0.838895 | 0.895882 | -6.47971 |
| MID1IP1  | -0.03978 | 0.432744 | -0.20591 | 0.838958 | 0.895882 | -6.47972 |

|           |          |           |          |          |          |          |
|-----------|----------|-----------|----------|----------|----------|----------|
| TMEM132I  | -0.00326 | -0.00114  | -0.01046 | 0.991771 | 1        | -6.47973 |
| THSD7A    | 7.65E-05 | -1.70E-05 | 0.000596 | 0.999531 | 1        | -6.47978 |
| PARD6B    | -0.05827 | 0.082618  | -0.20551 | 0.839263 | 0.896159 | -6.47981 |
| TMEM196   | 0.067822 | -0.08912  | 0.204964 | 0.839686 | 0.896513 | -6.47992 |
| NGEF      | -0.04245 | -0.09492  | -0.20484 | 0.839784 | 0.896569 | -6.47995 |
| RIMKLA    | -0.0515  | 0.031895  | -0.20453 | 0.840022 | 0.896725 | -6.48001 |
| ANGPTL6   | -0.0355  | 0.110254  | -0.2044  | 0.840117 | 0.896778 | -6.48004 |
| PLD6      | 0.066593 | 0.15676   | 0.203718 | 0.840646 | 0.897245 | -6.48018 |
| CPNE9     | -0.03089 | 0.085483  | -0.20361 | 0.840726 | 0.897279 | -6.48021 |
| RING1     | 0.035331 | 0.072676  | 0.203544 | 0.84078  | 0.897279 | -6.48022 |
| CEP290    | 0.071151 | -0.14464  | 0.203498 | 0.840816 | 0.897279 | -6.48023 |
| TH1L      | 0.040536 | 0.112503  | 0.20337  | 0.840915 | 0.897336 | -6.48026 |
| DDI1      | 0.03296  | -0.09177  | 0.147204 | 0.884533 | 0.929845 | -6.48031 |
| C14orf39  | 0.050621 | 0.086806  | 0.203066 | 0.841149 | 0.897537 | -6.48032 |
| RPL22     | 0.059367 | 0.221691  | 0.202902 | 0.841276 | 0.897623 | -6.48035 |
| SOX6      | -0.0324  | -0.01589  | -0.20277 | 0.841376 | 0.897682 | -6.48038 |
| ZPBP2     | 0.021122 | -0.04004  | 0.146664 | 0.884953 | 0.929996 | -6.48039 |
| C19orf22  | -0.04849 | 0.472349  | -0.20266 | 0.841463 | 0.897726 | -6.4804  |
| LIMS3-LOC | -0.07232 | 0.263361  | -0.14616 | 0.885347 | 0.93026  | -6.48047 |
| FOS       | -0.05854 | 0.230262  | -0.20162 | 0.842265 | 0.898533 | -6.48062 |
| PDIA5     | 0.037353 | 0.381115  | 0.201279 | 0.842527 | 0.898763 | -6.48069 |
| CLDND2    | -0.05889 | 0.251684  | -0.20115 | 0.842627 | 0.89882  | -6.48072 |
| ATF5      | 0.04978  | 0.090566  | 0.200837 | 0.842868 | 0.899029 | -6.48078 |
| UBE2D4    | -0.0404  | 0.295828  | -0.20069 | 0.842983 | 0.899087 | -6.48081 |
| ACCN3     | -0.06325 | 0.26157   | -0.20065 | 0.843014 | 0.899087 | -6.48082 |
| AKAP2     | 0.058562 | 0.737497  | 0.14366  | 0.887292 | 0.931754 | -6.48084 |
| USP18     | -0.12516 | 0.427417  | -0.20019 | 0.843366 | 0.899413 | -6.48091 |
| CBX6      | -0.02826 | 0.084615  | -0.19974 | 0.843715 | 0.899687 | -6.48101 |
| RFC5      | -0.04797 | -0.06238  | -0.19921 | 0.844123 | 0.900073 | -6.48111 |
| IFI44L    | 0.193068 | -0.15775  | 0.198807 | 0.844434 | 0.900307 | -6.4812  |
| NOL9      | 0.076854 | 0.204497  | 0.198622 | 0.844577 | 0.900373 | -6.48123 |
| CNTNAP4   | -0.0566  | -0.10611  | -0.19861 | 0.844588 | 0.900373 | -6.48124 |
| C15orf50  | -0.05612 | -0.06645  | -0.1984  | 0.844751 | 0.900498 | -6.48128 |
| TNK1      | 0.042508 | -0.06347  | 0.197834 | 0.845185 | 0.900841 | -6.48139 |
| GUSBP11   | -0.03888 | -0.04907  | -0.19766 | 0.845317 | 0.900901 | -6.48143 |
| FOXRED2   | -0.03304 | -0.03647  | -0.19761 | 0.845359 | 0.900901 | -6.48144 |
| ZNF821    | 0.035072 | 0.07829   | 0.197215 | 0.845663 | 0.901176 | -6.48152 |
| SMYD2     | 0.053317 | -0.14791  | 0.197147 | 0.845715 | 0.901183 | -6.48153 |
| PHF6      | 0.06111  | -0.26101  | 0.196971 | 0.845852 | 0.901279 | -6.48157 |
| SNRPD2    | -0.07491 | 0.009534  | -0.19679 | 0.845993 | 0.901352 | -6.48161 |
| LOC100233 | 0.081931 | 0.22802   | 0.196762 | 0.846013 | 0.901352 | -6.48161 |
| HUWE1     | -0.04763 | 0.262834  | -0.1967  | 0.846064 | 0.901354 | -6.48163 |
| C7orf58   | -0.08106 | 0.141202  | -0.19664 | 0.846107 | 0.901354 | -6.48164 |
| MFSD3     | -0.05694 | 0.451216  | -0.19654 | 0.846186 | 0.90139  | -6.48166 |
| LOC100507 | -0.06627 | -0.02002  | -0.19626 | 0.846398 | 0.901567 | -6.48171 |
| CTDSP1    | 0.029573 | -0.06965  | 0.196023 | 0.846583 | 0.901666 | -6.48176 |
| SERTM1    | -0.02502 | -0.01913  | -0.13677 | 0.892661 | 0.935887 | -6.48183 |

|           |          |          |          |          |          |          |
|-----------|----------|----------|----------|----------|----------|----------|
| C14orf79  | -0.0328  | 0.084866 | -0.19564 | 0.84688  | 0.901933 | -6.48184 |
| CCDC106   | 0.042979 | 0.182347 | 0.19556  | 0.846941 | 0.901938 | -6.48185 |
| C20orf96  | -0.0818  | 0.809781 | -0.19548 | 0.847005 | 0.901938 | -6.48187 |
| RASAL3    | 0.038692 | 0.01689  | 0.195454 | 0.847023 | 0.901938 | -6.48187 |
| NDUFB8    | -0.03634 | -0.02252 | -0.19531 | 0.847132 | 0.902005 | -6.4819  |
| KAT6B     | -0.0397  | 0.018438 | -0.19525 | 0.847177 | 0.902005 | -6.48191 |
| NGFRAP1   | -0.07465 | 0.616991 | -0.19519 | 0.847229 | 0.902011 | -6.48193 |
| MPP4      | -0.05525 | 0.313109 | -0.13607 | 0.893204 | 0.936274 | -6.48193 |
| MND1      | 0.06047  | -0.35958 | 0.194953 | 0.847409 | 0.902154 | -6.48197 |
| RASGRP2   | 0.028351 | -0.04266 | 0.194629 | 0.84766  | 0.902372 | -6.48204 |
| GOLM1     | 0.073759 | 0.414511 | 0.194569 | 0.847706 | 0.902372 | -6.48205 |
| C1orf216  | -0.02035 | 0.059216 | -0.13465 | 0.894311 | 0.936966 | -6.48213 |
| ADAM32    | 0.034728 | -0.05557 | 0.193932 | 0.848198 | 0.902836 | -6.48218 |
| CD2AP     | 0.045113 | 0.136387 | 0.193823 | 0.848283 | 0.902838 | -6.4822  |
| RAD1      | 0.022861 | -0.10353 | 0.193441 | 0.848577 | 0.903054 | -6.48228 |
| MAP1A     | -0.08533 | 0.313775 | -0.1932  | 0.848761 | 0.9032   | -6.48232 |
| ATP6V0D1  | -0.04242 | -0.02493 | -0.19314 | 0.848812 | 0.903205 | -6.48234 |
| BARX2     | -0.04893 | -0.18081 | -0.19258 | 0.84924  | 0.903562 | -6.48245 |
| ARMCX4    | 0.050768 | -0.04068 | 0.192488 | 0.849314 | 0.903568 | -6.48246 |
| UQCRC1    | -0.02525 | 0.052971 | -0.19245 | 0.849347 | 0.903568 | -6.48247 |
| LINC00312 | 0.037191 | -0.21567 | 0.192398 | 0.849383 | 0.903568 | -6.48248 |
| FARS2     | 0.043238 | 0.011306 | 0.192139 | 0.849584 | 0.903732 | -6.48253 |
| ZNF155    | 0.023954 | -0.06097 | 0.131545 | 0.896737 | 0.938475 | -6.48255 |
| FLG       | 0.046968 | -0.20513 | 0.191439 | 0.850125 | 0.904057 | -6.48267 |
| BTF3P11   | 0.033281 | 0.007338 | 0.191398 | 0.850156 | 0.904057 | -6.48268 |
| GBGT1     | 0.049818 | 0.268624 | 0.191337 | 0.850204 | 0.904057 | -6.48269 |
| ELP2      | 0.094945 | 0.098169 | 0.191256 | 0.850266 | 0.904065 | -6.48271 |
| SYTL5     | -0.01717 | 0.006928 | -0.12995 | 0.897985 | 0.939208 | -6.48277 |
| LINC00086 | -0.03494 | 0.08623  | -0.12952 | 0.898314 | 0.939452 | -6.48282 |
| ZBTB25    | 0.063023 | 0.241628 | 0.190455 | 0.850885 | 0.90467  | -6.48286 |
| NBPF3     | 0.038108 | 0.00018  | 0.190401 | 0.850927 | 0.90467  | -6.48287 |
| TCEA2     | 0.046647 | 0.232242 | 0.190221 | 0.851067 | 0.904769 | -6.48291 |
| NUAK2     | 0.03448  | 0.21994  | 0.190088 | 0.851169 | 0.904829 | -6.48293 |
| EPS15     | -0.03959 | -0.36499 | -0.18947 | 0.851643 | 0.905186 | -6.48305 |
| LOC283624 | -0.02165 | -0.01813 | -0.18932 | 0.851764 | 0.905265 | -6.48308 |
| NLRP7     | 0.08109  | 0.463393 | 0.189064 | 0.851961 | 0.905425 | -6.48313 |
| C2orf54   | -0.0235  | 0.039538 | -0.12713 | 0.900183 | 0.940854 | -6.48314 |
| ZNF416    | 0.064437 | -0.08992 | 0.188986 | 0.852021 | 0.90544  | -6.48315 |
| ATM       | -0.06335 | -0.02092 | -0.18889 | 0.852098 | 0.905473 | -6.48317 |
| KCNA10    | 0.036146 | -0.09727 | 0.188801 | 0.852165 | 0.905494 | -6.48319 |
| TMEM209   | 0.050444 | -0.47681 | 0.188687 | 0.852252 | 0.905538 | -6.48321 |
| C21orf33  | -0.03668 | 0.064502 | -0.18812 | 0.852689 | 0.905915 | -6.48332 |
| NETO1     | 0.052634 | 0.00541  | 0.188109 | 0.8527   | 0.905915 | -6.48332 |
| SLCO1A2   | -0.02992 | 0.051893 | -0.1878  | 0.852938 | 0.906119 | -6.48338 |
| USP54     | -0.03697 | 0.197638 | -0.18758 | 0.853108 | 0.906185 | -6.48342 |
| KIAA1683  | -0.04348 | 0.368509 | -0.18757 | 0.853119 | 0.906185 | -6.48342 |
| LOC284454 | 0.04536  | -0.29142 | 0.187497 | 0.853173 | 0.906185 | -6.48344 |



|           |          |          |          |          |          |          |
|-----------|----------|----------|----------|----------|----------|----------|
| CADM2     | -0.02677 | -0.06069 | -0.18721 | 0.853398 | 0.906324 | -6.48349 |
| RHCG      | 0.030358 | -0.18046 | 0.187193 | 0.853408 | 0.906324 | -6.48349 |
| MYO3B     | 0.021358 | 0.00411  | 0.187024 | 0.853539 | 0.906414 | -6.48353 |
| EPCAM     | -0.08713 | 0.077912 | -0.18667 | 0.853814 | 0.906657 | -6.4836  |
| ZBTB20    | 0.079925 | 0.06061  | 0.186416 | 0.854009 | 0.90676  | -6.48364 |
| DCLRE1A   | 0.040313 | -0.23209 | 0.123013 | 0.903398 | 0.943359 | -6.48367 |
| EPC1      | 0.029885 | -0.26597 | 0.186172 | 0.854198 | 0.906819 | -6.48369 |
| BEX2      | -0.09206 | 0.010909 | -0.1859  | 0.85441  | 0.906995 | -6.48374 |
| LOC647979 | 0.038106 | -0.17414 | 0.185157 | 0.854984 | 0.907505 | -6.48388 |
| ARHGAP6   | 0.117077 | 0.411078 | 0.185051 | 0.855065 | 0.907543 | -6.4839  |
| PRRC1     | -0.04163 | 0.025474 | -0.18485 | 0.855218 | 0.907579 | -6.48394 |
| SLC45A4   | -0.0509  | 0.475125 | -0.18483 | 0.855238 | 0.907579 | -6.48395 |
| ULK4      | 0.035441 | -0.197   | 0.18472  | 0.855322 | 0.907594 | -6.48397 |
| ZNF599    | 0.027389 | -0.03027 | 0.18469  | 0.855345 | 0.907594 | -6.48397 |
| NUP107    | -0.04746 | -0.17775 | -0.18441 | 0.855563 | 0.907776 | -6.48403 |
| UPK1A     | -0.03475 | 0.118432 | -0.18379 | 0.856042 | 0.908194 | -6.48414 |
| F2R       | 0.026469 | 0.040313 | 0.183779 | 0.85605  | 0.908194 | -6.48414 |
| GPATCH8   | 0.027415 | 0.004867 | 0.118331 | 0.907056 | 0.945918 | -6.48425 |
| BTN2A1    | 0.04706  | 0.22702  | 0.183181 | 0.856513 | 0.908587 | -6.48426 |
| TRIM31    | 0.019074 | 0.033498 | 0.118206 | 0.907154 | 0.94597  | -6.48427 |
| PCK2      | 0.045102 | 0.090493 | 0.183001 | 0.856652 | 0.908686 | -6.48429 |
| TCAP      | 0.02728  | 0.119902 | 0.182648 | 0.856925 | 0.908828 | -6.48436 |
| SYN2      | 0.043755 | -0.05622 | 0.11691  | 0.908167 | 0.946644 | -6.48442 |
| FAM176A   | -0.02967 | -0.00325 | -0.18208 | 0.857363 | 0.909243 | -6.48446 |
| MGC15705  | -0.05412 | -0.01416 | -0.18172 | 0.857646 | 0.909395 | -6.48453 |
| FAM82A2   | 0.047667 | 0.272029 | 0.181658 | 0.857692 | 0.909395 | -6.48454 |
| TMEM225   | 0.017593 | 0.033101 | 0.115703 | 0.90911  | 0.947281 | -6.48457 |
| TSPYL2    | -0.01875 | -0.04564 | -0.18139 | 0.857899 | 0.909516 | -6.48459 |
| MAP2K1    | -0.04776 | -0.04759 | -0.181   | 0.858204 | 0.90979  | -6.48466 |
| KIAA0247  | 0.042214 | -0.19741 | 0.180675 | 0.858453 | 0.909955 | -6.48472 |
| C13orf26  | 0.099606 | 0.334709 | 0.180471 | 0.858612 | 0.910074 | -6.48476 |
| KIAA1274  | 0.044766 | -0.22541 | 0.180333 | 0.858718 | 0.910138 | -6.48479 |
| PRKY      | -0.16659 | -0.67443 | -0.1802  | 0.858818 | 0.910169 | -6.48481 |
| VPREB3    | 0.073681 | 0.156901 | 0.180175 | 0.858841 | 0.910169 | -6.48482 |
| LYG2      | 0.028574 | -0.01781 | 0.113117 | 0.911133 | 0.948857 | -6.48487 |
| ZNF507    | -0.06799 | 0.221607 | -0.17863 | 0.86004  | 0.911334 | -6.4851  |
| CTSZ      | -0.0612  | -0.14608 | -0.17858 | 0.860079 | 0.911334 | -6.48511 |
| PP2D1     | -0.05032 | -0.15901 | -0.17801 | 0.860516 | 0.911748 | -6.48521 |
| LCE3C     | -0.02801 | -0.03564 | -0.17773 | 0.860731 | 0.911877 | -6.48526 |
| RUVBL1    | 0.057007 | 0.274141 | 0.177213 | 0.861135 | 0.912195 | -6.48536 |
| GSN       | -0.05261 | 0.192989 | -0.17701 | 0.861294 | 0.912195 | -6.4854  |
| HOXA10    | -0.05304 | 0.141385 | -0.177   | 0.861299 | 0.912195 | -6.4854  |
| RGS16     | 0.047501 | 0.185977 | 0.176987 | 0.861311 | 0.912195 | -6.4854  |
| SHC4      | 0.061594 | -0.08481 | 0.17682  | 0.86144  | 0.912282 | -6.48543 |
| NT5C3L    | 0.047782 | -0.12137 | 0.176648 | 0.861573 | 0.912375 | -6.48546 |
| BICC1     | 0.027113 | -0.05977 | 0.176384 | 0.861778 | 0.912542 | -6.48551 |
| STAU1     | 0.036649 | -0.03555 | 0.176002 | 0.862074 | 0.912807 | -6.48558 |

|           |          |          |          |          |          |          |
|-----------|----------|----------|----------|----------|----------|----------|
| GRIK1     | 0.039849 | -0.109   | 0.175904 | 0.86215  | 0.912811 | -6.4856  |
| LOC100506 | -0.02082 | 0.043225 | -0.1061  | 0.916623 | 0.952549 | -6.48566 |
| ENO3      | -0.02797 | 0.194742 | -0.17526 | 0.862652 | 0.913264 | -6.48571 |
| ANKRD28   | 0.03034  | 0.055692 | 0.175203 | 0.862693 | 0.913264 | -6.48572 |
| ANKRD30A  | 0.022584 | 0.079484 | 0.105199 | 0.917328 | 0.952919 | -6.48576 |
| GPN1      | -0.03415 | 0.009263 | -0.17498 | 0.862866 | 0.913398 | -6.48576 |
| SLC25A6   | 0.048424 | 0.082855 | 0.174895 | 0.862933 | 0.913419 | -6.48578 |
| MMACHC    | 0.030948 | 0.099944 | 0.174313 | 0.863384 | 0.913798 | -6.48588 |
| BARHL1    | -0.03333 | 0.10921  | -0.17424 | 0.863444 | 0.913812 | -6.4859  |
| PPP1R3D   | -0.04206 | -0.00405 | -0.1741  | 0.86355  | 0.913875 | -6.48592 |
| DDX3Y     | -0.10235 | 0.009832 | -0.17361 | 0.863933 | 0.914181 | -6.48601 |
| REEP4     | -0.0277  | 0.294761 | -0.17349 | 0.86402  | 0.914203 | -6.48603 |
| KIAA1467  | -0.0313  | 0.103661 | -0.17304 | 0.864372 | 0.914396 | -6.48611 |
| TMEM156   | 0.062663 | 0.166165 | 0.173009 | 0.864395 | 0.914396 | -6.48611 |
| C5orf20   | -0.05508 | 0.248242 | -0.17292 | 0.864462 | 0.914396 | -6.48613 |
| MAPKAPK2  | -0.02756 | -0.03949 | -0.17263 | 0.864692 | 0.914497 | -6.48618 |
| CDK18     | 0.019556 | 0.105243 | 0.172619 | 0.864697 | 0.914497 | -6.48618 |
| ASB3      | -0.02349 | -0.24107 | -0.17254 | 0.864763 | 0.914516 | -6.4862  |
| CTRB1     | 0.025117 | 0.014468 | 0.101041 | 0.920584 | 0.955348 | -6.4862  |
| AOX1      | 0.036499 | -0.30163 | 0.172048 | 0.865141 | 0.914832 | -6.48628 |
| TAS2R14   | 0.04159  | -0.07375 | 0.17203  | 0.865155 | 0.914832 | -6.48629 |
| IFIT5     | -0.08069 | -0.11666 | -0.17192 | 0.865241 | 0.914874 | -6.48631 |
| LOC100507 | -0.03812 | -0.35652 | -0.10002 | 0.921384 | 0.955723 | -6.48631 |
| NUDT9P1   | 0.044793 | -0.27962 | 0.170477 | 0.866359 | 0.915952 | -6.48656 |
| SGCA      | -0.0425  | 0.113466 | -0.17037 | 0.866439 | 0.915952 | -6.48658 |
| JPX       | 0.0401   | 0.028829 | 0.170288 | 0.866506 | 0.915965 | -6.48659 |
| TMEM133   | 0.065286 | -0.00641 | 0.169947 | 0.86677  | 0.916194 | -6.48665 |
| MAGED4B   | -0.05938 | 0.667296 | -0.16961 | 0.867035 | 0.916413 | -6.48671 |
| MKI67IP   | -0.05345 | -0.27574 | -0.16956 | 0.86707  | 0.916413 | -6.48672 |
| MKRN3     | 0.025919 | -0.12456 | 0.168846 | 0.867625 | 0.916851 | -6.48684 |
| ABCB4     | 0.03364  | 0.298237 | 0.094585 | 0.925642 | 0.958668 | -6.48685 |
| LDLRAD3   | 0.015597 | 0.026226 | 0.168267 | 0.868074 | 0.917226 | -6.48694 |
| GUCY1B3   | -0.07851 | 0.207437 | -0.16805 | 0.868241 | 0.917285 | -6.48698 |
| PPP1R14C  | 0.055309 | -0.01024 | 0.168046 | 0.868246 | 0.917285 | -6.48698 |
| LOC100508 | -0.03528 | -0.08875 | -0.16801 | 0.86827  | 0.917285 | -6.48699 |
| RGS8      | -0.02208 | -0.03991 | -0.16772 | 0.868497 | 0.917476 | -6.48704 |
| COX11     | 0.071248 | 0.089618 | 0.167208 | 0.868897 | 0.917848 | -6.48713 |
| C16orf58  | 0.039316 | 0.424766 | 0.166433 | 0.869498 | 0.918342 | -6.48726 |
| MS4A3     | -0.10636 | -0.27684 | -0.16642 | 0.869505 | 0.918342 | -6.48726 |
| SLC43A2   | 0.034739 | 0.270484 | 0.165924 | 0.869893 | 0.91856  | -6.48735 |
| PPIL6     | -0.01622 | -0.00834 | -0.16592 | 0.869899 | 0.91856  | -6.48735 |
| HTR3C     | 0.015665 | 0.07166  | 0.089225 | 0.929843 | 0.9619   | -6.48736 |
| C12orf23  | 0.07146  | -0.15207 | 0.165551 | 0.870183 | 0.918811 | -6.48741 |
| IL36A     | 0.020441 | -0.0652  | 0.165218 | 0.870443 | 0.919035 | -6.48747 |
| RPL23AP32 | -0.03967 | -0.09894 | -0.16512 | 0.870522 | 0.919069 | -6.48748 |
| ACVR2B    | -0.04477 | 0.274869 | -0.16503 | 0.870585 | 0.919078 | -6.4875  |
| PCDHGC5   | -0.03293 | -0.056   | -0.16498 | 0.870624 | 0.919078 | -6.48751 |

|           |          |          |          |          |          |          |
|-----------|----------|----------|----------|----------|----------|----------|
| CHRD1     | 0.015631 | -0.31565 | 0.086615 | 0.93189  | 0.963763 | -6.48759 |
| C14orf177 | 0.014432 | 0.016797 | 0.085892 | 0.932458 | 0.964197 | -6.48766 |
| COMMD4    | 0.035155 | -0.15413 | 0.164012 | 0.871379 | 0.919826 | -6.48767 |
| DGKE      | 0.039347 | -0.19468 | 0.163624 | 0.871681 | 0.920052 | -6.48773 |
| FLJ44087  | 0.024037 | -0.09817 | 0.163615 | 0.871688 | 0.920052 | -6.48774 |
| LOC257358 | 0.021836 | 0.205557 | 0.084979 | 0.933173 | 0.964734 | -6.48774 |
| ZNF652    | 0.050429 | 0.009092 | 0.162957 | 0.872199 | 0.920443 | -6.48785 |
| BCAR1     | 0.026121 | -0.22787 | 0.162945 | 0.872208 | 0.920443 | -6.48785 |
| LOC152586 | -0.04034 | -0.35737 | -0.1629  | 0.872246 | 0.920443 | -6.48786 |
| MYO15A    | -0.04385 | -0.00347 | -0.16241 | 0.872627 | 0.920746 | -6.48794 |
| ZNF670    | 0.023052 | -0.11185 | 0.161855 | 0.873055 | 0.921148 | -6.48803 |
| CLIC6     | -0.01623 | 0.054311 | -0.08148 | 0.935916 | 0.966397 | -6.48804 |
| SH3RF1    | -0.04079 | 0.046637 | -0.16173 | 0.873151 | 0.921199 | -6.48805 |
| RASGRP3   | 0.027356 | 0.055202 | 0.081125 | 0.936197 | 0.966444 | -6.48807 |
| TFEC      | -0.05488 | -0.03759 | -0.16157 | 0.873275 | 0.921242 | -6.48808 |
| CCDC6     | -0.03937 | 0.117529 | -0.16156 | 0.873285 | 0.921242 | -6.48808 |
| FKBP2     | 0.025055 | 0.114287 | 0.161164 | 0.873592 | 0.921485 | -6.48814 |
| PSMG3     | -0.02579 | -0.12699 | -0.16114 | 0.87361  | 0.921485 | -6.48815 |
| LILRA3    | -0.14745 | 0.366761 | -0.16069 | 0.873959 | 0.921754 | -6.48822 |
| ZZZ3      | 0.025846 | -0.28317 | 0.079206 | 0.937703 | 0.967478 | -6.48823 |
| PRG4      | 0.032368 | -0.01044 | 0.078614 | 0.938168 | 0.967803 | -6.48827 |
| CHTF18    | -0.03349 | 0.194522 | -0.16008 | 0.874433 | 0.922147 | -6.48832 |
| C3orf32   | 0.03035  | -0.09633 | 0.160031 | 0.874472 | 0.922147 | -6.48833 |
| HNRNPM    | 0.022583 | -0.01408 | 0.159946 | 0.874539 | 0.922167 | -6.48834 |
| LOC100506 | 0.022444 | 0.073221 | 0.076978 | 0.939451 | 0.968669 | -6.48841 |
| PHLDA1    | 0.037382 | -0.02358 | 0.159565 | 0.874835 | 0.92243  | -6.48841 |
| EPX       | -0.02802 | 0.014898 | -0.07689 | 0.939524 | 0.968692 | -6.48841 |
| DLG5      | 0.017232 | -0.06167 | 0.076672 | 0.939692 | 0.968696 | -6.48843 |
| RPL13AP17 | 0.037841 | -0.3629  | 0.159308 | 0.875034 | 0.922591 | -6.48845 |
| ZFAND2B   | -0.0207  | 0.103484 | -0.15898 | 0.875286 | 0.922757 | -6.4885  |
| FOLR4     | 0.014435 | -0.26049 | 0.075478 | 0.940629 | 0.969271 | -6.48852 |
| TDRD12    | 0.06858  | 0.062834 | 0.158814 | 0.875419 | 0.922847 | -6.48853 |
| PSORS1C2  | 0.03371  | -0.19545 | 0.158595 | 0.875589 | 0.922977 | -6.48857 |
| TPTE2P2   | 0.0138   | 0.043342 | 0.073208 | 0.942411 | 0.970597 | -6.4887  |
| P2RX4     | 0.067321 | 0.433816 | 0.15773  | 0.876262 | 0.923636 | -6.48871 |
| TM2D2     | 0.016889 | -0.32038 | 0.157446 | 0.876482 | 0.923808 | -6.48875 |
| DUSP7     | 0.01991  | 0.094929 | 0.157399 | 0.876519 | 0.923808 | -6.48876 |
| VPS37A    | -0.06754 | 0.185111 | -0.1573  | 0.876598 | 0.923841 | -6.48878 |
| FAM71A    | -0.03079 | 0.023517 | -0.15662 | 0.877126 | 0.924299 | -6.48889 |
| JAK1      | -0.06062 | 0.555963 | -0.15653 | 0.877192 | 0.924318 | -6.4889  |
| PIK3R3    | -0.02034 | -0.04237 | -0.06797 | 0.946523 | 0.973195 | -6.48908 |
| DMBT1     | -0.02745 | 0.002485 | -0.15533 | 0.878127 | 0.925254 | -6.48909 |
| RBM20     | -0.07714 | 0.137077 | -0.15505 | 0.878344 | 0.925352 | -6.48914 |
| WWOX      | 0.027705 | 0.004886 | 0.154962 | 0.878415 | 0.925352 | -6.48915 |
| NCAPH     | 0.044745 | -0.04308 | 0.154909 | 0.878456 | 0.925352 | -6.48916 |
| AHCTF1    | -0.04155 | 0.048187 | -0.15467 | 0.878644 | 0.9255   | -6.4892  |
| SCN2B     | 0.056133 | 0.256118 | 0.154566 | 0.878723 | 0.925512 | -6.48921 |

|           |          |          |          |          |          |          |
|-----------|----------|----------|----------|----------|----------|----------|
| TEAD1     | 0.022997 | -0.08564 | 0.154532 | 0.87875  | 0.925512 | -6.48922 |
| APBA2     | -0.0488  | 0.329032 | -0.1544  | 0.878852 | 0.92557  | -6.48924 |
| KIAA1841  | -0.06457 | 0.26836  | -0.154   | 0.87916  | 0.925795 | -6.4893  |
| DNAJC5    | 0.046351 | 0.215488 | 0.153668 | 0.879422 | 0.926021 | -6.48935 |
| C1QL3     | -0.02794 | 0.033773 | -0.06372 | 0.949865 | 0.975667 | -6.48937 |
| CEP250    | -0.03321 | 0.269288 | -0.15357 | 0.8795   | 0.926053 | -6.48937 |
| TCP11L2   | 0.044393 | -0.37063 | 0.153404 | 0.879627 | 0.926137 | -6.4894  |
| MATN1     | -0.02188 | -0.11663 | -0.1531  | 0.879866 | 0.926339 | -6.48944 |
| COX1      | 0.057403 | 0.077123 | 0.152826 | 0.880077 | 0.926512 | -6.48949 |
| SACS      | 0.041159 | -0.26312 | 0.152687 | 0.880185 | 0.926575 | -6.48951 |
| ADAMTS2C  | 0.00667  | -0.04341 | 0.061079 | 0.951939 | 0.976756 | -6.48953 |
| CDK19     | -0.03718 | 0.113595 | -0.15244 | 0.880381 | 0.926731 | -6.48955 |
| XRCC2     | -0.02175 | -0.06162 | -0.06079 | 0.952168 | 0.976845 | -6.48955 |
| WDR59     | -0.022   | 0.101226 | -0.15237 | 0.880432 | 0.926736 | -6.48956 |
| TPSAB1    | 0.057778 | 0.330289 | 0.152279 | 0.880503 | 0.926761 | -6.48957 |
| LOC400684 | 0.0359   | 0.32147  | 0.151818 | 0.880862 | 0.927053 | -6.48964 |
| SNRNP25   | -0.02558 | 0.011489 | -0.1518  | 0.880879 | 0.927053 | -6.48965 |
| PYHIN1    | 0.049091 | 0.500563 | 0.151492 | 0.881115 | 0.927188 | -6.4897  |
| ARHGAP36  | 0.027827 | 0.006227 | 0.151429 | 0.881165 | 0.927188 | -6.48971 |
| C16orf57  | 0.056501 | 0.416657 | 0.151392 | 0.881193 | 0.927188 | -6.48971 |
| C10orf10  | 0.023465 | 0.608624 | 0.057693 | 0.9546   | 0.978572 | -6.48974 |
| FNTA      | -0.02511 | -0.16877 | -0.15091 | 0.881566 | 0.927531 | -6.48979 |
| COLEC11   | -0.01993 | 0.09353  | -0.05679 | 0.955309 | 0.978992 | -6.48979 |
| PRKAR2B   | 0.028609 | 0.115755 | 0.05672  | 0.955364 | 0.978997 | -6.4898  |
| HACL1     | 0.033398 | -0.3048  | 0.150718 | 0.881718 | 0.927621 | -6.48982 |
| TRIB2     | 0.069787 | -0.12055 | 0.150682 | 0.881746 | 0.927621 | -6.48982 |
| PP7080    | -0.0675  | 0.30481  | -0.15044 | 0.881931 | 0.927715 | -6.48986 |
| MNAT1     | 0.013606 | 0.251851 | 0.055387 | 0.956413 | 0.979517 | -6.48988 |
| PTTG3P    | 0.011937 | -0.18503 | 0.055158 | 0.956593 | 0.97959  | -6.48989 |
| ANKRD16   | -0.03955 | 0.146353 | -0.15017 | 0.882146 | 0.927892 | -6.4899  |
| SERINC4   | -0.02591 | 0.013627 | -0.14975 | 0.882471 | 0.928134 | -6.48996 |
| MIB1      | -0.03702 | 0.040381 | -0.14952 | 0.882649 | 0.928271 | -6.49    |
| PON2      | 0.035883 | 0.121903 | 0.149292 | 0.882828 | 0.92841  | -6.49003 |
| COL8A1    | -0.04328 | -0.02099 | -0.14921 | 0.882894 | 0.928429 | -6.49005 |
| KIAA1147  | 0.01937  | -0.12299 | 0.049163 | 0.961306 | 0.982978 | -6.49021 |
| ARL2      | 0.03273  | 0.245976 | 0.147856 | 0.883947 | 0.92945  | -6.49025 |
| ZYG11A    | 0.021322 | -0.02187 | 0.147792 | 0.883997 | 0.92945  | -6.49026 |
| TOB2P1    | 0.032795 | 0.111543 | 0.147746 | 0.884033 | 0.92945  | -6.49027 |
| WNT3      | 0.024128 | -0.14463 | 0.147718 | 0.884054 | 0.92945  | -6.49027 |
| MYO5A     | -0.03186 | 0.138778 | -0.14719 | 0.884466 | 0.929833 | -6.49035 |
| GDPD1     | -0.00333 | -0.01667 | -0.04582 | 0.963935 | 0.98469  | -6.49037 |
| RSL24D1   | -0.04758 | -0.38725 | -0.14705 | 0.884572 | 0.929845 | -6.49038 |
| STK36     | -0.04919 | -0.00293 | -0.14695 | 0.884655 | 0.929882 | -6.49039 |
| DNM1P46   | -0.02663 | -0.30022 | -0.14682 | 0.88475  | 0.929932 | -6.49041 |
| RPL6      | -0.04247 | -0.00861 | -0.14667 | 0.88487  | 0.929958 | -6.49043 |
| FKTN      | -0.03412 | 0.07808  | -0.14648 | 0.88502  | 0.930016 | -6.49046 |
| MYT1L     | -0.03786 | -0.02388 | -0.14617 | 0.885262 | 0.93022  | -6.49051 |

|           |          |          |          |          |          |          |
|-----------|----------|----------|----------|----------|----------|----------|
| C12orf60  | -0.04239 | -0.03528 | -0.14566 | 0.885657 | 0.930536 | -6.49058 |
| N4BP2     | -0.02415 | -0.17042 | -0.14534 | 0.885905 | 0.930735 | -6.49063 |
| PTK2      | 0.047152 | 0.582295 | 0.145296 | 0.885942 | 0.930735 | -6.49064 |
| KIR3DL2   | -0.05775 | 0.528368 | -0.14523 | 0.885989 | 0.930735 | -6.49065 |
| CCNJ      | 0.011405 | 0.143799 | 0.039071 | 0.969245 | 0.988672 | -6.49067 |
| FRMD7     | -0.01806 | 0.148723 | -0.03852 | 0.969675 | 0.988843 | -6.49069 |
| LOC44146  | 0.045432 | -0.14103 | 0.144901 | 0.886249 | 0.930958 | -6.4907  |
| RPS10     | -0.05473 | -0.09127 | -0.14479 | 0.886337 | 0.931001 | -6.49071 |
| LOC100130 | 0.034264 | -0.23386 | 0.144703 | 0.886404 | 0.931021 | -6.49073 |
| NFKB1     | -0.03301 | 0.076001 | -0.14392 | 0.887011 | 0.931558 | -6.49084 |
| LOC100130 | -0.02918 | 0.276652 | -0.14374 | 0.88715  | 0.931655 | -6.49087 |
| HSPB2     | -0.00876 | -0.18899 | -0.03313 | 0.973917 | 0.991568 | -6.49089 |
| LOC100500 | 0.008465 | -0.19963 | 0.033081 | 0.973957 | 0.991568 | -6.49089 |
| BBS12     | 0.013131 | 0.240393 | 0.032588 | 0.974346 | 0.991878 | -6.49091 |
| SERPINA12 | 0.004367 | -0.21687 | 0.032226 | 0.97463  | 0.992047 | -6.49092 |
| NAP1L1    | 0.057282 | 0.153657 | 0.143269 | 0.887521 | 0.931944 | -6.49094 |
| MMRN2     | -0.02639 | -0.0691  | -0.14315 | 0.887613 | 0.931991 | -6.49096 |
| SLC17A8   | -0.00841 | -0.00505 | -0.14283 | 0.887865 | 0.932206 | -6.491   |
| LOC100500 | -0.00498 | -0.04082 | -0.02871 | 0.977394 | 0.994189 | -6.49103 |
| UNC79     | -0.00178 | 0.007541 | -0.02738 | 0.978447 | 0.994974 | -6.49107 |
| CABP7     | -0.02845 | 0.417397 | -0.14236 | 0.888232 | 0.932541 | -6.49107 |
| TRH       | -0.03601 | 0.298369 | -0.14202 | 0.888494 | 0.932728 | -6.49112 |
| FAM18B2   | -0.02816 | 0.194743 | -0.14198 | 0.888526 | 0.932728 | -6.49113 |
| THBS4     | 0.062089 | 0.237842 | 0.141946 | 0.888553 | 0.932728 | -6.49113 |
| DOPEY1    | -0.00875 | 0.134839 | -0.0243  | 0.980867 | 0.996583 | -6.49115 |
| PTPRR     | 0.004158 | -0.14869 | 0.023976 | 0.981123 | 0.996792 | -6.49116 |
| PALM2-AK  | 0.023826 | -0.39409 | 0.141518 | 0.888886 | 0.933028 | -6.49119 |
| ERVK13-1  | 0.031621 | -0.07897 | 0.141435 | 0.88895  | 0.933046 | -6.49121 |
| CTTNBP2   | -0.00792 | 0.231304 | -0.02158 | 0.983007 | 0.998085 | -6.49121 |
| ZNF736    | 0.003689 | -0.05282 | 0.021248 | 0.983271 | 0.99825  | -6.49122 |
| DNMT3B    | -0.00402 | -0.07322 | -0.02073 | 0.983682 | 0.998563 | -6.49123 |
| GRIP1     | -0.00689 | 0.352026 | -0.02044 | 0.983905 | 0.998682 | -6.49124 |
| ADAMDEC   | -0.00275 | -0.11017 | -0.01985 | 0.984375 | 0.998956 | -6.49125 |
| POU5F1P4  | -0.03234 | 0.090381 | -0.14101 | 0.889279 | 0.933291 | -6.49127 |
| CRYZ      | 0.059579 | -0.4354  | 0.140864 | 0.889396 | 0.933363 | -6.49129 |
| HOXC6     | -0.00437 | 0.002053 | -0.01517 | 0.988059 | 1        | -6.49134 |
| RPS10P7   | 0.003587 | 0.08308  | 0.014787 | 0.988358 | 1        | -6.49134 |
| AQP2      | 0.024935 | 2.06E-05 | 0.140335 | 0.889808 | 0.933696 | -6.49137 |
| C14orf149 | 0.003621 | -0.06767 | 0.01134  | 0.991071 | 1        | -6.49139 |
| C9orf68   | -0.00503 | 0.053408 | -0.01121 | 0.991172 | 1        | -6.49139 |
| C7orf31   | 0.002151 | 0.180206 | 0.01052  | 0.991717 | 1        | -6.4914  |
| ZNF525    | 0.049091 | -0.3277  | 0.140093 | 0.889997 | 0.933844 | -6.4914  |
| TMEM39B   | 0.019698 | 0.119595 | 0.139977 | 0.890088 | 0.933889 | -6.49142 |
| LIG3      | -0.02059 | 0.081269 | -0.13989 | 0.890154 | 0.933908 | -6.49143 |
| ATG9A     | 0.027077 | 0.260157 | 0.139783 | 0.890239 | 0.933947 | -6.49145 |
| KCNH8     | 0.000821 | 0.175718 | 0.001768 | 0.998608 | 1        | -6.49145 |
| LOC440900 | 8.74E-05 | 0.438847 | 0.000219 | 0.999827 | 1        | -6.49145 |

|           |          |          |          |          |          |          |
|-----------|----------|----------|----------|----------|----------|----------|
| RAET1K    | 1.29E-05 | 0.039626 | 7.19E-05 | 0.999943 | 1        | -6.49145 |
| LYPD1     | 0        | 0        | 0        | 1        | 1        | -6.49145 |
| DAOA-AS1  | 0        | 0        | 0        | 1        | 1        | -6.49145 |
| GEMIN6    | -0.0393  | -0.0168  | -0.13945 | 0.8905   | 0.934171 | -6.49149 |
| CRY1      | 0.039683 | -0.11755 | 0.138738 | 0.891054 | 0.934603 | -6.49159 |
| SMCR8     | 0.021542 | -0.17478 | 0.138545 | 0.891205 | 0.934711 | -6.49162 |
| LOC100501 | -0.01186 | -0.02753 | -0.1382  | 0.891472 | 0.934891 | -6.49167 |
| CSAG1     | -0.02195 | -0.07529 | -0.13795 | 0.891665 | 0.935043 | -6.49171 |
| GLYATL1   | 0.043395 | -0.382   | 0.137177 | 0.892272 | 0.93563  | -6.49182 |
| TAF5L     | -0.0414  | 0.082262 | -0.13658 | 0.892735 | 0.935915 | -6.4919  |
| SETD7     | 0.063859 | 0.619948 | 0.13596  | 0.893221 | 0.936274 | -6.49199 |
| ARHGEF25  | 0.037975 | 0.01321  | 0.135505 | 0.893576 | 0.936597 | -6.49205 |
| FGL2      | -0.05963 | 0.168388 | -0.13542 | 0.893644 | 0.936617 | -6.49206 |
| GLDC      | -0.06265 | 0.521368 | -0.13528 | 0.893754 | 0.936656 | -6.49208 |
| BRPF3     | 0.021613 | -0.03041 | 0.135249 | 0.893776 | 0.936656 | -6.49208 |
| PTPRN     | 0.040907 | 0.349495 | 0.135167 | 0.89384  | 0.936673 | -6.4921  |
| SH3BGR13  | 0.028069 | 0.17569  | 0.134963 | 0.893999 | 0.936789 | -6.49212 |
| GLIPR2    | -0.02464 | 0.062168 | -0.13482 | 0.894108 | 0.936853 | -6.49214 |
| KCNH3     | 0.038486 | 0.277662 | 0.13463  | 0.894259 | 0.936961 | -6.49217 |
| POLD4     | -0.02415 | 0.109519 | -0.13421 | 0.894589 | 0.937207 | -6.49223 |
| NAPSA     | 0.055627 | 0.176062 | 0.134026 | 0.894731 | 0.937305 | -6.49225 |
| PRAME     | -0.05703 | 0.086826 | -0.13394 | 0.894798 | 0.937325 | -6.49227 |
| ADRA2C    | -0.0274  | -0.09429 | -0.1338  | 0.894907 | 0.937325 | -6.49228 |
| CTSK      | -0.03653 | -0.04602 | -0.1338  | 0.894908 | 0.937325 | -6.49229 |
| KIAA0232  | 0.029994 | -0.25553 | 0.133757 | 0.894941 | 0.937325 | -6.49229 |
| NEMF      | -0.02677 | -0.1053  | -0.13351 | 0.895133 | 0.937389 | -6.49232 |
| LOC100285 | 0.025988 | 0.440841 | 0.133495 | 0.895145 | 0.937389 | -6.49233 |
| C3orf22   | 0.021307 | -0.25993 | 0.1332   | 0.895375 | 0.937579 | -6.49237 |
| ATF4      | 0.030247 | 0.14074  | 0.133026 | 0.895511 | 0.937664 | -6.49239 |
| MCAM      | -0.03234 | 0.065338 | -0.13297 | 0.895552 | 0.937664 | -6.4924  |
| TMEM85    | -0.01968 | -0.34525 | -0.13276 | 0.895717 | 0.937786 | -6.49243 |
| ETV5      | 0.037577 | 0.042285 | 0.132124 | 0.896215 | 0.938208 | -6.49251 |
| CCDC88A   | -0.03221 | -0.17194 | -0.132   | 0.896311 | 0.938258 | -6.49253 |
| SCARB1    | 0.027127 | 0.286502 | 0.13175  | 0.896507 | 0.938411 | -6.49256 |
| SBDS      | 0.02878  | -0.05776 | 0.131691 | 0.896553 | 0.938411 | -6.49257 |
| NDUFS7    | -0.02302 | 0.158656 | -0.13148 | 0.89672  | 0.938475 | -6.4926  |
| CCDC110   | 0.008519 | -0.0017  | 0.131429 | 0.896758 | 0.938475 | -6.49261 |
| ZMYND19   | 0.04267  | 0.299498 | 0.131325 | 0.896839 | 0.938479 | -6.49262 |
| DDX31     | -0.04509 | 0.280355 | -0.13125 | 0.896895 | 0.938479 | -6.49263 |
| SMG5      | 0.017813 | 0.423882 | 0.131226 | 0.896917 | 0.938479 | -6.49263 |
| NVL       | -0.02988 | -0.01971 | -0.13118 | 0.896953 | 0.938479 | -6.49264 |
| TSG101    | 0.040936 | 0.031059 | 0.13076  | 0.89728  | 0.938772 | -6.4927  |
| PLCB3     | -0.03227 | 0.421344 | -0.13047 | 0.897508 | 0.938942 | -6.49274 |
| NOP2      | -0.02887 | 0.317137 | -0.13034 | 0.897608 | 0.938942 | -6.49275 |
| TRAF5     | -0.04432 | 0.043003 | -0.12995 | 0.897915 | 0.939185 | -6.49281 |
| KIAA0146  | -0.02797 | 0.139092 | -0.12954 | 0.898231 | 0.939415 | -6.49286 |
| ELAC2     | 0.024707 | 0.172822 | 0.129166 | 0.898525 | 0.939623 | -6.49291 |

|           |          |          |          |          |          |          |
|-----------|----------|----------|----------|----------|----------|----------|
| MIDN      | 0.035191 | 0.262495 | 0.128856 | 0.898767 | 0.939825 | -6.49295 |
| SELP      | 0.053942 | 0.415388 | 0.128459 | 0.899077 | 0.940099 | -6.493   |
| CHMP2A    | 0.028007 | 0.006666 | 0.128097 | 0.89936  | 0.940345 | -6.49305 |
| NEURL3    | 0.032008 | -0.15782 | 0.127918 | 0.8995   | 0.940441 | -6.49307 |
| C3orf52   | -0.03341 | 0.114674 | -0.1277  | 0.899667 | 0.940565 | -6.4931  |
| LOC100506 | 0.040781 | -0.02474 | 0.127483 | 0.89984  | 0.940646 | -6.49313 |
| ANP32C    | 0.018636 | -0.13593 | 0.127418 | 0.89989  | 0.940648 | -6.49314 |
| ZMIZ1     | -0.03802 | 0.08666  | -0.1272  | 0.900065 | 0.94078  | -6.49317 |
| CCHCR1    | 0.017891 | 0.039252 | 0.126582 | 0.900544 | 0.941137 | -6.49325 |
| SLC35F2   | 0.029756 | 0.058543 | 0.126574 | 0.90055  | 0.941137 | -6.49325 |
| KAT2A     | -0.03256 | 0.393977 | -0.12649 | 0.900612 | 0.941152 | -6.49326 |
| C11orf80  | -0.05373 | 0.63048  | -0.12622 | 0.90083  | 0.941287 | -6.4933  |
| METRNL    | 0.029965 | 0.03646  | 0.126206 | 0.900837 | 0.941287 | -6.4933  |
| LDHC      | -0.02251 | -0.08831 | -0.12555 | 0.901351 | 0.941773 | -6.49338 |
| RESP18    | 0.027979 | -0.18193 | 0.124728 | 0.901993 | 0.942393 | -6.49349 |
| RHBDL2    | -0.03254 | -0.08872 | -0.12464 | 0.902063 | 0.942416 | -6.4935  |
| CYTL1     | -0.02877 | 0.181136 | -0.12443 | 0.902226 | 0.942537 | -6.49353 |
| CITED1    | -0.03065 | 0.031012 | -0.12436 | 0.902276 | 0.942539 | -6.49353 |
| SCNM1     | -0.0427  | 0.327363 | -0.12413 | 0.902457 | 0.942677 | -6.49356 |
| NUBP2     | -0.02199 | 0.14044  | -0.12376 | 0.902746 | 0.942929 | -6.49361 |
| WDR4      | 0.03081  | 0.178569 | 0.123518 | 0.902938 | 0.942979 | -6.49364 |
| C19orf25  | -0.01672 | 0.307614 | -0.1227  | 0.903575 | 0.943494 | -6.49375 |
| PKD1      | -0.03413 | 0.313646 | -0.12193 | 0.904177 | 0.944072 | -6.49384 |
| TTC26     | 0.050787 | 0.369981 | 0.121577 | 0.904456 | 0.944262 | -6.49389 |
| HLA-B     | -0.04458 | 0.307902 | -0.12147 | 0.904536 | 0.944296 | -6.4939  |
| VENTXP1   | -0.00704 | -0.00422 | -0.12098 | 0.904923 | 0.944649 | -6.49396 |
| SRSF3     | -0.02867 | -0.35411 | -0.12087 | 0.905005 | 0.944684 | -6.49397 |
| C11orf67  | -0.02501 | -0.10104 | -0.12069 | 0.905152 | 0.944737 | -6.494   |
| TRAM1     | 0.042555 | -0.62222 | 0.120578 | 0.905236 | 0.94476  | -6.49401 |
| LINC00338 | 0.022521 | -0.03068 | 0.120396 | 0.905379 | 0.94476  | -6.49403 |
| TNC       | 0.024673 | -0.06318 | 0.120309 | 0.905447 | 0.94476  | -6.49404 |
| C1QTNF6   | 0.026295 | 0.178436 | 0.120289 | 0.905463 | 0.94476  | -6.49405 |
| DPY30     | -0.03582 | -0.49048 | -0.12029 | 0.905464 | 0.94476  | -6.49405 |
| GRHL3     | 0.019887 | 0.042889 | 0.119645 | 0.905966 | 0.945184 | -6.49413 |
| SLC4A9    | 0.022149 | 0.044269 | 0.119401 | 0.906157 | 0.945332 | -6.49416 |
| FUT3      | 0.02132  | -0.18833 | 0.118726 | 0.906684 | 0.945716 | -6.49424 |
| ST13      | -0.02684 | 0.236719 | -0.11866 | 0.906739 | 0.945716 | -6.49425 |
| POGLUT1   | -0.02587 | -0.25108 | -0.11862 | 0.906766 | 0.945716 | -6.49425 |
| PADI1     | -0.02243 | -0.03207 | -0.11829 | 0.90703  | 0.945918 | -6.49429 |
| CHST1     | 0.022412 | 0.04495  | 0.118024 | 0.907234 | 0.946003 | -6.49432 |
| ZCCHC18   | -0.02153 | 0.137576 | -0.11734 | 0.907767 | 0.94642  | -6.49441 |
| OAZ2      | 0.028832 | -0.03247 | 0.117297 | 0.907803 | 0.94642  | -6.49441 |
| ARL15     | 0.015551 | 0.044289 | 0.117266 | 0.907827 | 0.94642  | -6.49442 |
| TNFRSF8   | -0.02167 | 0.103646 | -0.11686 | 0.908143 | 0.946644 | -6.49446 |
| SEC14L2   | 0.033087 | 0.180234 | 0.116806 | 0.908186 | 0.946644 | -6.49447 |
| PPARGC1B  | -0.03298 | 0.384877 | -0.11644 | 0.908475 | 0.946894 | -6.49451 |
| C6orf125  | 0.03397  | 0.083753 | 0.116364 | 0.908532 | 0.946903 | -6.49452 |

|           |          |          |          |          |          |          |
|-----------|----------|----------|----------|----------|----------|----------|
| ABHD10    | 0.032808 | -0.46899 | 0.11618  | 0.908677 | 0.947003 | -6.49455 |
| KCTD6     | 0.026321 | 0.09538  | 0.116056 | 0.908773 | 0.947054 | -6.49456 |
| GPN2      | 0.017135 | -0.02385 | 0.115577 | 0.909148 | 0.947281 | -6.49462 |
| ELOVL6    | 0.026365 | -0.02378 | 0.11553  | 0.909185 | 0.947281 | -6.49462 |
| ALG5      | 0.023723 | -0.07266 | 0.115372 | 0.909309 | 0.94736  | -6.49464 |
| SI        | -0.01258 | -0.04918 | -0.11508 | 0.909536 | 0.947546 | -6.49468 |
| MCF2L-AS1 | -0.05621 | 0.4819   | -0.1149  | 0.909681 | 0.947647 | -6.4947  |
| NPW       | 0.03184  | 0.349023 | 0.114802 | 0.909754 | 0.947673 | -6.49471 |
| CTPS2     | -0.01817 | 0.091845 | -0.11449 | 0.91     | 0.947878 | -6.49475 |
| CCL11     | -0.04665 | 0.262274 | -0.11423 | 0.910203 | 0.948039 | -6.49478 |
| ARHGEF19  | -0.02114 | 0.14021  | -0.11358 | 0.91071  | 0.948467 | -6.49485 |
| FDXR      | 0.023293 | 0.077155 | 0.112723 | 0.911382 | 0.949065 | -6.49495 |
| KCTD10    | -0.04746 | 0.363289 | -0.11226 | 0.911745 | 0.949342 | -6.495   |
| SDR9C7    | 0.038577 | -0.08282 | 0.111836 | 0.912076 | 0.949637 | -6.49505 |
| TRIM64    | 0.026978 | 0.096286 | 0.111661 | 0.912213 | 0.949697 | -6.49507 |
| RAP1GDS1  | -0.02058 | -0.2165  | -0.11164 | 0.91223  | 0.949697 | -6.49508 |
| CLCF1     | 0.024086 | 0.256735 | 0.111533 | 0.912313 | 0.949732 | -6.49509 |
| SLC39A11  | -0.03534 | 0.101098 | -0.1114  | 0.912419 | 0.949792 | -6.4951  |
| MRPL46    | 0.021208 | -0.27115 | 0.111161 | 0.912604 | 0.949935 | -6.49513 |
| TTC4      | 0.01708  | -0.15538 | 0.11062  | 0.913028 | 0.950313 | -6.49519 |
| TRAF4     | 0.026557 | 0.286783 | 0.110573 | 0.913064 | 0.950313 | -6.4952  |
| OOEP      | 0.017591 | -0.1183  | 0.110086 | 0.913446 | 0.950461 | -6.49525 |
| TMEM55B   | -0.01059 | 0.013223 | -0.11005 | 0.913471 | 0.950461 | -6.49526 |
| C12orf45  | 0.032426 | 0.254689 | 0.110048 | 0.913475 | 0.950461 | -6.49526 |
| C21orf63  | 0.016974 | 0.031543 | 0.110031 | 0.913489 | 0.950461 | -6.49526 |
| LOC150622 | 0.010988 | -0.0022  | 0.109765 | 0.913697 | 0.950569 | -6.49529 |
| Sep-01    | 0.040111 | 0.352305 | 0.10972  | 0.913732 | 0.950569 | -6.49529 |
| ITGBL1    | 0.009052 | -0.02427 | 0.109657 | 0.913781 | 0.950569 | -6.4953  |
| MYOZ2     | 0.025226 | -0.04241 | 0.109638 | 0.913796 | 0.950569 | -6.4953  |
| LTF       | -0.12242 | -0.23381 | -0.10909 | 0.914228 | 0.950841 | -6.49537 |
| KLHDC7B   | -0.03702 | 0.079047 | -0.10906 | 0.914251 | 0.950841 | -6.49537 |
| FNBP1L    | 0.026912 | -0.21815 | 0.108691 | 0.914538 | 0.951088 | -6.49541 |
| TTC30A    | -0.03188 | 0.03955  | -0.10863 | 0.914589 | 0.951091 | -6.49542 |
| HOMER2    | 0.037518 | 0.724891 | 0.108435 | 0.914738 | 0.951196 | -6.49544 |
| CSTF1     | 0.02305  | 0.098709 | 0.108045 | 0.915044 | 0.951412 | -6.49548 |
| RNF169    | 0.020897 | -0.16478 | 0.107841 | 0.915203 | 0.951528 | -6.4955  |
| C3orf62   | -0.05655 | 0.696763 | -0.1076  | 0.91539  | 0.951651 | -6.49553 |
| PLEKHA6   | -0.0383  | 0.163819 | -0.10757 | 0.915419 | 0.951651 | -6.49553 |
| ZNF518B   | -0.02021 | -0.2273  | -0.10739 | 0.915557 | 0.951744 | -6.49555 |
| POLR2G    | -0.01553 | -0.03356 | -0.10706 | 0.915818 | 0.951965 | -6.49559 |
| MS4A14    | -0.06044 | 0.81533  | -0.10698 | 0.915878 | 0.951976 | -6.4956  |
| ASPSCR1   | -0.03445 | 0.490641 | -0.1069  | 0.915942 | 0.951993 | -6.49561 |
| FAM181B   | -0.04552 | 0.278977 | -0.10677 | 0.916045 | 0.952026 | -6.49562 |
| TMEM14C   | 0.027839 | -0.43824 | 0.106733 | 0.916071 | 0.952026 | -6.49563 |
| RNF4      | -0.01576 | 0.152327 | -0.10586 | 0.916757 | 0.952588 | -6.49572 |
| APOBEC3D  | -0.02794 | 0.312294 | -0.10557 | 0.916979 | 0.952767 | -6.49575 |
| RPL27     | 0.05567  | -0.56977 | 0.105337 | 0.917164 | 0.952909 | -6.49578 |



|           |          |          |          |          |          |          |
|-----------|----------|----------|----------|----------|----------|----------|
| SSBP1     | 0.033346 | 0.169841 | 0.105092 | 0.917357 | 0.952919 | -6.4958  |
| PHC1      | -0.05692 | 0.52299  | -0.10508 | 0.917368 | 0.952919 | -6.49581 |
| UAP1      | -0.03118 | 0.189997 | -0.10507 | 0.917373 | 0.952919 | -6.49581 |
| RINT1     | 0.035312 | 0.013803 | 0.105015 | 0.917417 | 0.952919 | -6.49581 |
| C9orf43   | -0.02674 | -0.01465 | -0.10486 | 0.91754  | 0.952997 | -6.49583 |
| TMEM106   | 0.027921 | 0.031344 | 0.104748 | 0.917626 | 0.953029 | -6.49584 |
| SRD5A3    | -0.02745 | 0.011598 | -0.10413 | 0.918107 | 0.95339  | -6.49591 |
| TFPT      | 0.013092 | 0.066513 | 0.104126 | 0.918114 | 0.95339  | -6.49591 |
| DTWD1     | 0.022591 | 0.059655 | 0.104004 | 0.918209 | 0.953438 | -6.49592 |
| BRCA2     | 0.030076 | 0.285984 | 0.103794 | 0.918373 | 0.953559 | -6.49594 |
| PDPR      | -0.03257 | 0.520108 | -0.10327 | 0.918781 | 0.953931 | -6.496   |
| HTR3A     | 0.024189 | -0.04207 | 0.103134 | 0.918891 | 0.953973 | -6.49601 |
| C11orf63  | -0.0213  | 0.089455 | -0.10306 | 0.918948 | 0.953973 | -6.49602 |
| CBX2      | -0.0174  | -0.14085 | -0.10294 | 0.919047 | 0.954005 | -6.49603 |
| FXD5      | 0.019298 | 0.23869  | 0.102662 | 0.91926  | 0.954176 | -6.49606 |
| NOLC1     | 0.035373 | 0.109479 | 0.101332 | 0.920303 | 0.955107 | -6.4962  |
| ARHGEF18  | -0.02374 | 0.290577 | -0.10086 | 0.92067  | 0.955387 | -6.49625 |
| OR10A2    | -0.01672 | -0.02431 | -0.10044 | 0.920998 | 0.955639 | -6.49629 |
| RNASE11   | -0.03101 | -0.17948 | -0.10043 | 0.921011 | 0.955639 | -6.4963  |
| UIMC1     | -0.01135 | 0.086163 | -0.1001  | 0.921265 | 0.955723 | -6.49633 |
| AGPHD1    | 0.040451 | 0.341684 | 0.100069 | 0.921293 | 0.955723 | -6.49633 |
| NMB       | 0.025958 | 0.191073 | 0.100027 | 0.921325 | 0.955723 | -6.49634 |
| SCNN1D    | -0.02603 | -0.12613 | -0.09999 | 0.921355 | 0.955723 | -6.49634 |
| RELB      | 0.02101  | 0.119073 | 0.099968 | 0.921372 | 0.955723 | -6.49634 |
| LIPI      | -0.01208 | -0.02179 | -0.09988 | 0.921444 | 0.955734 | -6.49635 |
| CTSL2     | -0.03033 | 0.123143 | -0.09894 | 0.922175 | 0.956391 | -6.49645 |
| METTL21C  | 0.013947 | -0.00279 | 0.098693 | 0.922371 | 0.956455 | -6.49647 |
| SLC35E3   | -0.01822 | -0.14129 | -0.09869 | 0.922371 | 0.956455 | -6.49647 |
| PRR3      | -0.01384 | 0.205417 | -0.09862 | 0.922427 | 0.956455 | -6.49648 |
| SLC8A2    | 0.013571 | -0.01249 | 0.098421 | 0.922584 | 0.956538 | -6.4965  |
| SNN       | -0.01929 | 0.520102 | -0.09822 | 0.922739 | 0.956612 | -6.49652 |
| GNAZ      | -0.01895 | -0.2318  | -0.09817 | 0.922779 | 0.956612 | -6.49653 |
| ALG3      | 0.018026 | 0.382948 | 0.097894 | 0.922997 | 0.956777 | -6.49655 |
| LOC100506 | 0.022576 | -0.02253 | 0.097809 | 0.923064 | 0.956777 | -6.49656 |
| Sep-04    | 0.081953 | 0.678186 | 0.097783 | 0.923085 | 0.956777 | -6.49657 |
| CHST15    | 0.032622 | 0.0023   | 0.097275 | 0.923483 | 0.957089 | -6.49662 |
| DAP3      | -0.01281 | -0.03728 | -0.09669 | 0.923939 | 0.957511 | -6.49667 |
| TBXA2R    | -0.03492 | 0.367138 | -0.09636 | 0.9242   | 0.957731 | -6.49671 |
| OR2B6     | -0.02702 | -0.05235 | -0.09619 | 0.924333 | 0.957794 | -6.49672 |
| ABCC6     | -0.02557 | 0.282051 | -0.0961  | 0.924408 | 0.957794 | -6.49673 |
| PKD1P1    | 0.019163 | -0.12155 | 0.095897 | 0.924564 | 0.957905 | -6.49675 |
| COX16     | 0.034683 | -0.43224 | 0.095743 | 0.924684 | 0.957979 | -6.49677 |
| ND2       | -0.0323  | 0.588369 | -0.0956  | 0.924794 | 0.958023 | -6.49678 |
| HSD17B6   | 0.02187  | 0.178062 | 0.095564 | 0.924824 | 0.958023 | -6.49679 |
| FRS2      | -0.01167 | -0.03935 | -0.0951  | 0.92519  | 0.958351 | -6.49683 |
| MC1R      | -0.02341 | 0.288015 | -0.09498 | 0.925286 | 0.9584   | -6.49684 |
| P2RX7     | 0.036523 | 0.653797 | 0.094783 | 0.925437 | 0.958506 | -6.49686 |

|           |          |          |          |          |          |          |
|-----------|----------|----------|----------|----------|----------|----------|
| PPIA      | 0.026882 | 0.157349 | 0.094287 | 0.925826 | 0.958807 | -6.49691 |
| C3orf35   | -0.02232 | 0.122967 | -0.0934  | 0.926523 | 0.959336 | -6.497   |
| LOC100501 | 0.030007 | -0.12751 | 0.093386 | 0.926532 | 0.959336 | -6.497   |
| HNRNPH3   | -0.02799 | -0.13637 | -0.0929  | 0.926913 | 0.95968  | -6.49704 |
| LAT       | -0.03059 | 0.414682 | -0.09276 | 0.927025 | 0.959745 | -6.49706 |
| MIF4GD    | 0.016492 | 0.13276  | 0.092429 | 0.927283 | 0.959961 | -6.49709 |
| MUM1      | 0.017546 | 0.356585 | 0.091864 | 0.927726 | 0.960369 | -6.49714 |
| CDKN1A    | -0.02432 | 0.535203 | -0.09167 | 0.927882 | 0.96048  | -6.49716 |
| PLG       | 0.01965  | 0.050214 | 0.09104  | 0.928372 | 0.960886 | -6.49722 |
| RXRA      | -0.03131 | 0.277281 | -0.09091 | 0.928471 | 0.960938 | -6.49723 |
| SRSF7     | 0.019364 | -0.16724 | 0.090588 | 0.928727 | 0.961151 | -6.49726 |
| NCAPH2    | -0.0277  | 0.315302 | -0.09052 | 0.928782 | 0.961157 | -6.49727 |
| DKFZP586I | -0.01757 | -0.13855 | -0.09018 | 0.929047 | 0.961381 | -6.4973  |
| CPNE7     | 0.015999 | 0.083277 | 0.089757 | 0.929379 | 0.961572 | -6.49734 |
| RFWD3     | -0.03192 | 0.177209 | -0.08943 | 0.929632 | 0.961783 | -6.49737 |
| PKD2      | 0.022558 | 0.200904 | 0.089266 | 0.929765 | 0.96187  | -6.49738 |
| WHAMM     | 0.018276 | 0.044129 | 0.088707 | 0.930203 | 0.962221 | -6.49743 |
| LRRC56    | -0.03167 | 0.45817  | -0.08849 | 0.930373 | 0.962346 | -6.49745 |
| NAE1      | -0.02342 | -0.30414 | -0.08757 | 0.931095 | 0.962991 | -6.49754 |
| FANCC     | -0.02253 | 0.042828 | -0.08618 | 0.932188 | 0.96402  | -6.49766 |
| NDP       | 0.017191 | -0.00602 | 0.085904 | 0.932402 | 0.964191 | -6.49769 |
| LOC100270 | 0.017068 | -0.03287 | 0.085632 | 0.932616 | 0.96431  | -6.49771 |
| PAPD7     | -0.01806 | 0.198401 | -0.08555 | 0.93268  | 0.964326 | -6.49772 |
| PRSS50    | 0.051797 | 0.736093 | 0.085466 | 0.932746 | 0.964343 | -6.49772 |
| ITPR3     | 0.026588 | 0.302383 | 0.084724 | 0.933329 | 0.964844 | -6.49779 |
| GAL3ST4   | 0.014293 | 0.159471 | 0.084486 | 0.933516 | 0.964927 | -6.49781 |
| C10orf107 | 0.026522 | 0.155017 | 0.084457 | 0.933538 | 0.964927 | -6.49781 |
| PPP1R21   | 0.023884 | -0.45384 | 0.084384 | 0.933596 | 0.964927 | -6.49782 |
| BMP10     | -0.01537 | 0.02187  | -0.08428 | 0.933674 | 0.964927 | -6.49783 |
| GPAT2     | 0.022577 | 0.032594 | 0.08426  | 0.933693 | 0.964927 | -6.49783 |
| LOC155060 | 0.028976 | 0.37463  | 0.08421  | 0.933732 | 0.964927 | -6.49783 |
| LOC375291 | -0.00668 | 0.022372 | -0.08404 | 0.933866 | 0.964992 | -6.49785 |
| MYO18B    | -0.01335 | -0.04814 | -0.08386 | 0.934004 | 0.965079 | -6.49786 |
| GNG7      | 0.023892 | 0.50007  | 0.083806 | 0.934049 | 0.965079 | -6.49787 |
| CBY1      | -0.01665 | 0.065616 | -0.08354 | 0.934259 | 0.965245 | -6.49789 |
| PPAP2A    | 0.025315 | -0.12996 | 0.082945 | 0.934726 | 0.965676 | -6.49794 |
| CEP68     | -0.02077 | -0.02837 | -0.08265 | 0.934957 | 0.965864 | -6.49797 |
| FAM50B    | -0.02045 | 0.12837  | -0.08251 | 0.935066 | 0.965887 | -6.49798 |
| CRAMP1L   | -0.02486 | 0.094055 | -0.0825  | 0.935078 | 0.965887 | -6.49798 |
| ZC3H4     | -0.01705 | 0.099951 | -0.08232 | 0.935218 | 0.965981 | -6.498   |
| LINC00477 | -0.01986 | 0.140167 | -0.08218 | 0.935329 | 0.966045 | -6.49801 |
| CRYGD     | 0.022746 | 0.127249 | 0.081923 | 0.935528 | 0.96615  | -6.49803 |
| IFIT2     | 0.058931 | 0.164995 | 0.081921 | 0.935529 | 0.96615  | -6.49803 |
| PARP2     | -0.02433 | 0.18451  | -0.08181 | 0.935617 | 0.966189 | -6.49804 |
| PRKAG2    | -0.02793 | 0.543166 | -0.08172 | 0.935691 | 0.966214 | -6.49805 |
| AP4S1     | 0.013939 | 0.06099  | 0.081007 | 0.936247 | 0.966444 | -6.49811 |
| GAB2      | 0.022179 | 0.115911 | 0.080908 | 0.936325 | 0.966444 | -6.49811 |

|           |          |          |          |          |          |          |
|-----------|----------|----------|----------|----------|----------|----------|
| POLR3C    | -0.02778 | 0.315733 | -0.0809  | 0.936332 | 0.966444 | -6.49811 |
| EPHA7     | -0.02092 | -0.0428  | -0.08087 | 0.936357 | 0.966444 | -6.49812 |
| MRPS14    | -0.02058 | -0.22083 | -0.08056 | 0.936595 | 0.966618 | -6.49814 |
| PLA2G4C   | 0.024329 | 0.310103 | 0.080527 | 0.936624 | 0.966618 | -6.49815 |
| TNFRSF10C | -0.01925 | 0.055229 | -0.08041 | 0.936716 | 0.966662 | -6.49815 |
| TARBP1    | -0.0271  | 0.05449  | -0.08029 | 0.936808 | 0.966706 | -6.49816 |
| ARIH2     | -0.01164 | 0.002492 | -0.07973 | 0.937249 | 0.967111 | -6.49821 |
| NUP98     | -0.02361 | 0.299002 | -0.07915 | 0.937704 | 0.967478 | -6.49826 |
| DHODH     | -0.02637 | 0.235406 | -0.07885 | 0.937943 | 0.967671 | -6.49828 |
| POLR2D    | 0.014028 | 0.029621 | 0.078787 | 0.93799  | 0.967671 | -6.49829 |
| LOC100506 | 0.016442 | 0.10135  | 0.077933 | 0.938661 | 0.968261 | -6.49836 |
| GDF3      | -0.01265 | -0.16637 | -0.0777  | 0.938841 | 0.968386 | -6.49837 |
| PROS1     | -0.04397 | 0.44747  | -0.07761 | 0.938918 | 0.968386 | -6.49838 |
| SEC31A    | -0.01989 | 0.243326 | -0.07758 | 0.938936 | 0.968386 | -6.49838 |
| LENG9     | -0.01386 | -0.02368 | -0.07753 | 0.938979 | 0.968386 | -6.49839 |
| ZBTB9     | -0.0178  | 0.286766 | -0.07736 | 0.939108 | 0.968428 | -6.4984  |
| RIBC1     | 0.013434 | 0.046573 | 0.077349 | 0.939119 | 0.968428 | -6.4984  |
| UBE2MP1   | -0.01423 | 0.14725  | -0.07708 | 0.939331 | 0.968596 | -6.49842 |
| BCKDHB    | -0.01956 | -0.02326 | -0.07673 | 0.939607 | 0.968696 | -6.49845 |
| ZNF853    | -0.02681 | 0.679287 | -0.07667 | 0.939649 | 0.968696 | -6.49846 |
| NEFH      | 0.019516 | 0.237621 | 0.076578 | 0.939725 | 0.968696 | -6.49846 |
| FAM78A    | -0.01287 | 0.324292 | -0.07629 | 0.939952 | 0.96884  | -6.49849 |
| MGC3771   | -0.02703 | 0.166629 | -0.07615 | 0.940062 | 0.96884  | -6.4985  |
| PWWP2A    | 0.022446 | 0.045725 | 0.076149 | 0.940062 | 0.96884  | -6.4985  |
| GP6       | -0.0265  | 0.303585 | -0.07583 | 0.94031  | 0.969044 | -6.49852 |
| LOC100129 | 0.022835 | 0.440253 | 0.07577  | 0.94036  | 0.969044 | -6.49853 |
| ANKRD24   | -0.01816 | 0.33711  | -0.07525 | 0.94077  | 0.969359 | -6.49857 |
| NDST1     | -0.01862 | 0.328625 | -0.07519 | 0.940813 | 0.969359 | -6.49857 |
| CCDC86    | 0.019944 | 0.225979 | 0.074938 | 0.941014 | 0.969515 | -6.49859 |
| ATP6V1B2  | -0.02758 | -0.17691 | -0.07467 | 0.941228 | 0.969684 | -6.49861 |
| ACTN4     | -0.01908 | 0.383902 | -0.07411 | 0.941667 | 0.970085 | -6.49865 |
| SYT2      | -0.01028 | -0.01246 | -0.07392 | 0.941817 | 0.970169 | -6.49867 |
| GOT1      | -0.01401 | 0.105164 | -0.07388 | 0.941847 | 0.970169 | -6.49867 |
| MUC20     | -0.01536 | -0.025   | -0.07308 | 0.942477 | 0.970597 | -6.49873 |
| FLJ32955  | -0.01266 | -0.13877 | -0.07304 | 0.942508 | 0.970597 | -6.49874 |
| UTS2      | 0.06351  | -0.42806 | 0.072978 | 0.942553 | 0.970597 | -6.49874 |
| SLC26A1   | 0.020742 | 0.631242 | 0.072929 | 0.942592 | 0.970597 | -6.49874 |
| CHRNA1    | 0.013372 | 0.003126 | 0.072925 | 0.942595 | 0.970597 | -6.49874 |
| POP1      | 0.014761 | 0.179041 | 0.072905 | 0.942611 | 0.970597 | -6.49875 |
| CACNA1D   | -0.02543 | 0.282803 | -0.07281 | 0.942687 | 0.970597 | -6.49875 |
| DOCK1     | 0.020449 | 0.079452 | 0.072781 | 0.942708 | 0.970597 | -6.49875 |
| HLA-F     | 0.012742 | 0.070667 | 0.072545 | 0.942894 | 0.970737 | -6.49877 |
| CLTCL1    | -0.02609 | 0.227143 | -0.07197 | 0.943348 | 0.971083 | -6.49882 |
| C11orf46  | -0.00968 | 0.001937 | -0.07193 | 0.943378 | 0.971083 | -6.49882 |
| FLJ37035  | -0.01313 | 0.068768 | -0.07176 | 0.943512 | 0.971169 | -6.49883 |
| CDH10     | -0.00929 | -0.17747 | -0.0716  | 0.943636 | 0.971243 | -6.49884 |
| DDX21     | -0.01607 | -0.02575 | -0.07154 | 0.943683 | 0.971243 | -6.49885 |

|          |          |          |          |          |          |          |
|----------|----------|----------|----------|----------|----------|----------|
| ATPAF2   | -0.0121  | -0.00436 | -0.07114 | 0.943995 | 0.971462 | -6.49888 |
| BNIP1    | -0.01571 | -0.04101 | -0.07023 | 0.944716 | 0.972136 | -6.49894 |
| GPD1     | -0.01608 | -0.1204  | -0.07006 | 0.944843 | 0.972136 | -6.49895 |
| PELI1    | 0.026743 | -0.44135 | 0.07004  | 0.944862 | 0.972136 | -6.49896 |
| TUT1     | 0.023768 | 0.448711 | 0.069994 | 0.944898 | 0.972136 | -6.49896 |
| PP12719  | -0.01883 | 0.054542 | -0.0699  | 0.94497  | 0.972159 | -6.49897 |
| SEC63    | 0.014723 | -0.09611 | 0.069775 | 0.94507  | 0.972161 | -6.49897 |
| LGALS9C  | -0.01465 | 0.259387 | -0.06977 | 0.945071 | 0.972161 | -6.49897 |
| TRAF3IP2 | 0.022838 | 0.465915 | 0.069229 | 0.9455   | 0.972551 | -6.49901 |
| CRNN     | 0.014317 | -0.16967 | 0.069151 | 0.945561 | 0.972562 | -6.49902 |
| BIRC6    | -0.01674 | 0.080987 | -0.06907 | 0.945623 | 0.972575 | -6.49902 |
| RSPH6A   | -0.01383 | 0.002142 | -0.06857 | 0.946019 | 0.972919 | -6.49906 |
| GPSM1    | -0.02561 | 0.42042  | -0.06831 | 0.946221 | 0.973037 | -6.49908 |
| BEND7    | 0.022799 | 0.013287 | 0.068118 | 0.946372 | 0.973142 | -6.49909 |
| LOC64338 | -0.00818 | 0.000536 | -0.06796 | 0.946497 | 0.973195 | -6.4991  |
| FANCG    | -0.01277 | 0.192091 | -0.06768 | 0.946713 | 0.973339 | -6.49912 |
| GHRLOS2  | 0.012395 | 0.201834 | 0.067377 | 0.946955 | 0.973537 | -6.49914 |
| TAAR6    | 0.028572 | 0.212055 | 0.067101 | 0.947172 | 0.973657 | -6.49916 |
| GALM     | 0.02248  | 0.328579 | 0.067029 | 0.947228 | 0.973664 | -6.49917 |
| GCDH     | 0.010269 | 0.108133 | 0.066966 | 0.947278 | 0.973664 | -6.49917 |
| MYLK2    | 0.012253 | -0.12748 | 0.066668 | 0.947512 | 0.973854 | -6.49919 |
| CCDC64B  | 0.040104 | 0.306707 | 0.066295 | 0.947805 | 0.974104 | -6.49922 |
| ZNF319   | -0.00372 | 0.000744 | -0.06581 | 0.948188 | 0.974436 | -6.49925 |
| PATE1    | 0.01431  | -0.11648 | 0.065758 | 0.948228 | 0.974436 | -6.49925 |
| C3orf25  | -0.01269 | 0.203383 | -0.06553 | 0.948405 | 0.974567 | -6.49927 |
| CLDN14   | 0.01018  | -0.13266 | 0.065069 | 0.948769 | 0.974891 | -6.4993  |
| SAA1     | -0.02186 | -0.13197 | -0.064   | 0.949606 | 0.975648 | -6.49937 |
| STOX1    | -0.03136 | -0.04509 | -0.06387 | 0.949711 | 0.975667 | -6.49938 |
| OR2V2    | -0.00752 | -0.06427 | -0.06376 | 0.9498   | 0.975667 | -6.49939 |
| ZNF628   | -0.01422 | 0.249758 | -0.06368 | 0.949858 | 0.975667 | -6.49939 |
| AHCYL2   | -0.01659 | 0.255191 | -0.06366 | 0.949874 | 0.975667 | -6.49939 |
| MKRN2    | 0.02584  | -0.12981 | 0.063585 | 0.949936 | 0.97568  | -6.4994  |
| HEATR3   | 0.012098 | -0.31308 | 0.063261 | 0.950191 | 0.97589  | -6.49942 |
| CLASP2   | -0.01537 | -0.23222 | -0.06285 | 0.950511 | 0.976168 | -6.49945 |
| GANAB    | 0.011449 | 0.171737 | 0.062787 | 0.950564 | 0.976171 | -6.49945 |
| CXorf41  | 0.003593 | -0.00435 | 0.062539 | 0.950759 | 0.97632  | -6.49947 |
| PEX3     | 0.029436 | 0.00226  | 0.062271 | 0.950969 | 0.976437 | -6.49948 |
| SSTR1    | -0.01406 | -0.03437 | -0.06226 | 0.950979 | 0.976437 | -6.49948 |
| GPA33    | -0.03275 | 0.39073  | -0.0621  | 0.951105 | 0.976437 | -6.49949 |
| FBXL13   | -0.01936 | 0.324479 | -0.06208 | 0.951122 | 0.976437 | -6.4995  |
| PAX8     | 0.013836 | 0.006442 | 0.061942 | 0.951228 | 0.976495 | -6.4995  |
| CHST11   | 0.015621 | 0.180804 | 0.061756 | 0.951374 | 0.976547 | -6.49952 |
| TAS2R45  | 0.026683 | 0.136388 | 0.061251 | 0.951771 | 0.976756 | -6.49955 |
| CGN      | 0.009158 | -0.18002 | 0.061174 | 0.951832 | 0.976756 | -6.49955 |
| FABP4    | -0.01977 | 0.068566 | -0.06104 | 0.951937 | 0.976756 | -6.49956 |
| WDR31    | -0.0216  | 0.218474 | -0.06101 | 0.951958 | 0.976756 | -6.49956 |
| C5orf38  | -0.00762 | 0.197033 | -0.06101 | 0.951963 | 0.976756 | -6.49956 |

|           |          |          |          |          |          |          |
|-----------|----------|----------|----------|----------|----------|----------|
| MAP2K4    | 0.012533 | -0.10583 | 0.060969 | 0.951993 | 0.976756 | -6.49957 |
| LYST      | 0.019733 | -0.40934 | 0.060922 | 0.95203  | 0.976756 | -6.49957 |
| FBXW8     | -0.02462 | 0.530433 | -0.06068 | 0.952217 | 0.976845 | -6.49958 |
| HELZ      | 0.015051 | -0.02868 | 0.06058  | 0.952299 | 0.976878 | -6.49959 |
| ABHD4     | -0.01038 | 0.360647 | -0.0605  | 0.952365 | 0.976894 | -6.4996  |
| CXCR2P1   | 0.021119 | 0.516668 | 0.060213 | 0.952588 | 0.977072 | -6.49961 |
| SHF       | 0.010806 | 0.257047 | 0.060092 | 0.952683 | 0.977088 | -6.49962 |
| SLC39A14  | -0.01717 | 0.094643 | -0.06007 | 0.952703 | 0.977088 | -6.49962 |
| CSTB      | -0.01134 | 0.103097 | -0.05955 | 0.953112 | 0.977363 | -6.49965 |
| RASL12    | 0.018236 | 0.156936 | 0.059535 | 0.953121 | 0.977363 | -6.49965 |
| HTRA3     | 0.036215 | 0.373604 | 0.059389 | 0.953236 | 0.97743  | -6.49966 |
| OR4C15    | 0.01078  | -0.17495 | 0.059264 | 0.953334 | 0.977479 | -6.49967 |
| LOC151174 | -0.01561 | 0.208333 | -0.05859 | 0.953862 | 0.97797  | -6.49971 |
| TTLL12    | -0.03324 | -0.48826 | -0.05798 | 0.954342 | 0.97841  | -6.49975 |
| KRT2      | -0.02315 | 0.28771  | -0.05788 | 0.954426 | 0.978445 | -6.49975 |
| FASTKD1   | -0.02    | 0.238085 | -0.05746 | 0.954754 | 0.978679 | -6.49978 |
| C3orf30   | 0.017342 | 0.009801 | 0.057154 | 0.954993 | 0.978873 | -6.4998  |
| RPL21P44  | 0.021543 | -0.28712 | 0.057029 | 0.955091 | 0.978923 | -6.4998  |
| POLR3A    | 0.008988 | 0.016728 | 0.056913 | 0.955183 | 0.978923 | -6.49981 |
| PPAPDC2   | 0.01882  | 0.04103  | 0.056902 | 0.955192 | 0.978923 | -6.49981 |
| TPRXL     | 0.012873 | -0.06115 | 0.056556 | 0.955464 | 0.979016 | -6.49983 |
| ADCY6     | -0.03222 | 0.54825  | -0.05653 | 0.955482 | 0.979016 | -6.49983 |
| DDX49     | -0.01195 | 0.294146 | -0.05605 | 0.955861 | 0.979272 | -6.49986 |
| CLPP      | 0.010544 | 0.071688 | 0.05596  | 0.955933 | 0.979272 | -6.49987 |
| XPO4      | -0.01032 | -0.00751 | -0.05569 | 0.956141 | 0.979391 | -6.49988 |
| ZNF181    | 0.011477 | 0.003508 | 0.055686 | 0.956148 | 0.979391 | -6.49988 |
| VCX2      | -0.02688 | 0.340905 | -0.05562 | 0.956199 | 0.979391 | -6.49989 |
| C7orf40   | 0.013322 | -0.02133 | 0.055338 | 0.956422 | 0.979517 | -6.4999  |
| NARS2     | -0.01387 | -0.03246 | -0.05491 | 0.956755 | 0.979703 | -6.49993 |
| ZNF268    | -0.0166  | -0.56396 | -0.05485 | 0.956803 | 0.979703 | -6.49993 |
| MLLT3     | 0.018851 | 0.094721 | 0.05459  | 0.957011 | 0.979865 | -6.49994 |
| ENPP4     | 0.011461 | -0.38866 | 0.05437  | 0.957183 | 0.979944 | -6.49996 |
| CAT       | -0.02189 | -0.23038 | -0.05436 | 0.957189 | 0.979944 | -6.49996 |
| NFKBIE    | -0.01154 | 0.317711 | -0.05417 | 0.957343 | 0.980051 | -6.49997 |
| GNRH1     | 0.01235  | 0.045752 | 0.053861 | 0.957584 | 0.980246 | -6.49999 |
| DDIT3     | -0.01612 | 0.073769 | -0.05369 | 0.957722 | 0.9803   | -6.49999 |
| ELK4      | -0.01653 | -0.18282 | -0.05366 | 0.95774  | 0.9803   | -6.5     |
| RNF43     | -0.01539 | 0.347328 | -0.05357 | 0.957809 | 0.9803   | -6.5     |
| PCNP      | -0.01905 | -0.41758 | -0.05354 | 0.957837 | 0.9803   | -6.5     |
| CCT6B     | 0.015616 | -0.18439 | 0.053266 | 0.958052 | 0.98047  | -6.50002 |
| LOC153546 | -0.01156 | -0.01895 | -0.05286 | 0.95837  | 0.980705 | -6.50004 |
| ZNF287    | -0.00902 | -0.07162 | -0.05285 | 0.958382 | 0.980705 | -6.50004 |
| SAFB2     | 0.007012 | 0.103279 | 0.052453 | 0.958691 | 0.98097  | -6.50006 |
| FGD2      | 0.014324 | 0.249771 | 0.052014 | 0.959037 | 0.981221 | -6.50009 |
| LOC100506 | -0.01161 | -0.06447 | -0.05161 | 0.959351 | 0.981491 | -6.50011 |
| ITIH6     | 0.011408 | -0.0632  | 0.051158 | 0.959711 | 0.981808 | -6.50013 |
| GAS2L1    | 0.023042 | 0.760247 | 0.050766 | 0.960019 | 0.982072 | -6.50015 |

|           |          |          |          |          |          |          |
|-----------|----------|----------|----------|----------|----------|----------|
| TRNP1     | -0.0105  | 0.069187 | -0.04948 | 0.961034 | 0.982926 | -6.50022 |
| MATN3     | -0.00441 | -0.00265 | -0.04947 | 0.96104  | 0.982926 | -6.50022 |
| GDF10     | -0.01059 | 0.031194 | -0.04945 | 0.961054 | 0.982926 | -6.50022 |
| LOC284648 | 0.018641 | 0.161634 | 0.049258 | 0.961206 | 0.98297  | -6.50023 |
| PLK2      | 0.008213 | 0.087382 | 0.048938 | 0.961457 | 0.983082 | -6.50024 |
| GUCA1B    | 0.010372 | 0.106695 | 0.048833 | 0.96154  | 0.983115 | -6.50025 |
| ATPIF1    | -0.0111  | -0.18013 | -0.04869 | 0.961654 | 0.983128 | -6.50026 |
| TSSK4     | -0.00814 | 0.014436 | -0.04862 | 0.961704 | 0.983129 | -6.50026 |
| PPP1R10   | 0.011723 | 0.197928 | 0.048552 | 0.961761 | 0.983135 | -6.50026 |
| LOC645245 | -0.01668 | -0.21653 | -0.04812 | 0.962104 | 0.983435 | -6.50029 |
| PHB       | 0.010914 | -0.11316 | 0.04804  | 0.962164 | 0.983445 | -6.50029 |
| ENPEP     | 0.004496 | -0.0009  | 0.047832 | 0.962328 | 0.983561 | -6.5003  |
| BEX4      | -0.01395 | 0.205287 | -0.04712 | 0.962888 | 0.984073 | -6.50033 |
| OLFML1    | 0.008546 | -0.22185 | 0.047068 | 0.962929 | 0.984073 | -6.50034 |
| TP53      | 0.011979 | 0.59588  | 0.046837 | 0.963111 | 0.984208 | -6.50035 |
| PABPC5    | 0.00525  | 0.025041 | 0.04674  | 0.963187 | 0.984224 | -6.50035 |
| ANGPT1    | -0.00308 | 0.008645 | -0.04669 | 0.963227 | 0.984224 | -6.50036 |
| AMFR      | 0.008288 | 0.054759 | 0.046424 | 0.963436 | 0.984334 | -6.50037 |
| GATM      | -0.02061 | -0.12596 | -0.04587 | 0.963875 | 0.98468  | -6.50039 |
| MTOR      | -0.00879 | -0.10573 | -0.04563 | 0.964059 | 0.984766 | -6.50041 |
| C17orf39  | -0.00884 | 0.124707 | -0.04554 | 0.964134 | 0.984791 | -6.50041 |
| TIE1      | -0.01927 | 0.66145  | -0.04498 | 0.964575 | 0.985088 | -6.50044 |
| ASAP2     | -0.00464 | 0.000928 | -0.04471 | 0.964782 | 0.985196 | -6.50045 |
| CCDC121   | -0.01171 | 0.181235 | -0.04426 | 0.965135 | 0.985505 | -6.50047 |
| AAAS      | 0.006984 | 0.156444 | 0.043852 | 0.96546  | 0.985785 | -6.50049 |
| CYTH3     | 0.011326 | 0.382921 | 0.043602 | 0.965657 | 0.985884 | -6.5005  |
| RNF157    | 0.015307 | -0.00289 | 0.043508 | 0.965731 | 0.985908 | -6.5005  |
| BOD1L     | -0.01809 | 0.392325 | -0.04334 | 0.96586  | 0.985989 | -6.50051 |
| RNF5      | -0.0071  | 0.161456 | -0.04295 | 0.966168 | 0.986252 | -6.50053 |
| BMPR1A    | 0.009781 | 0.007366 | 0.042751 | 0.966327 | 0.986362 | -6.50054 |
| LEF1      | -0.02311 | 0.582361 | -0.04214 | 0.96681  | 0.986804 | -6.50056 |
| C5orf52   | -0.01049 | -0.213   | -0.04117 | 0.967574 | 0.98748  | -6.5006  |
| C1orf226  | 0.005748 | -0.07631 | 0.040934 | 0.967757 | 0.98758  | -6.50061 |
| PF4V1     | 0.022186 | 0.251293 | 0.040915 | 0.967772 | 0.98758  | -6.50062 |
| C19orf66  | -0.00881 | 0.20664  | -0.04044 | 0.968148 | 0.987912 | -6.50064 |
| SARS2     | 0.009723 | 0.352547 | 0.040056 | 0.968448 | 0.988167 | -6.50065 |
| FAM111B   | -0.00348 | -0.00315 | -0.0396  | 0.96881  | 0.988485 | -6.50067 |
| CDK2AP1   | -0.01231 | 0.254104 | -0.0395  | 0.968884 | 0.988509 | -6.50067 |
| HSPB3     | -0.00994 | -0.11489 | -0.03916 | 0.969151 | 0.988672 | -6.50069 |
| MYOCD     | -0.00478 | -0.06365 | -0.03898 | 0.969294 | 0.988672 | -6.50069 |
| MCFD2     | -0.01003 | -0.08432 | -0.03898 | 0.969296 | 0.988672 | -6.50069 |
| RSAD2     | -0.04365 | 0.179412 | -0.03874 | 0.969484 | 0.988785 | -6.5007  |
| RAB12     | 0.011282 | 0.150659 | 0.038615 | 0.969583 | 0.98881  | -6.50071 |
| LOC100655 | -0.00734 | -0.16347 | -0.03845 | 0.969716 | 0.988843 | -6.50072 |
| RCBTB1    | 0.012302 | 0.034615 | 0.037978 | 0.970084 | 0.989163 | -6.50073 |
| CCDC72    | -0.01352 | -0.49303 | -0.03792 | 0.970131 | 0.989163 | -6.50074 |
| MKRN9P    | 0.007494 | -0.23852 | 0.037698 | 0.970305 | 0.989289 | -6.50074 |

|           |          |          |          |          |          |          |
|-----------|----------|----------|----------|----------|----------|----------|
| ZNF669    | 0.002631 | 0.01567  | 0.037547 | 0.970423 | 0.989358 | -6.50075 |
| ZBTB3     | -0.00811 | -0.3499  | -0.03743 | 0.970519 | 0.989404 | -6.50076 |
| MBLAC1    | -0.00839 | 0.08761  | -0.03723 | 0.970669 | 0.989481 | -6.50076 |
| TMEM89    | 0.007003 | -0.01335 | 0.037148 | 0.970738 | 0.989481 | -6.50077 |
| SPHK2     | -0.00637 | 0.089149 | -0.03714 | 0.970746 | 0.989481 | -6.50077 |
| SETD3     | 0.011909 | -0.005   | 0.037038 | 0.970824 | 0.98951  | -6.50077 |
| AMH       | -0.00743 | -0.05944 | -0.03683 | 0.970991 | 0.989628 | -6.50078 |
| SHOX2     | 0.006543 | -0.17143 | 0.036037 | 0.971612 | 0.99021  | -6.50081 |
| ASAP3     | 0.006331 | 0.303564 | 0.035717 | 0.971865 | 0.990326 | -6.50082 |
| ITGB1     | -0.01465 | -0.13207 | -0.0357  | 0.971874 | 0.990326 | -6.50082 |
| TEAD2     | 0.005463 | 0.200936 | 0.0357   | 0.971878 | 0.990326 | -6.50082 |
| OXGR1     | -0.00688 | -0.00484 | -0.03563 | 0.97193  | 0.990328 | -6.50082 |
| ATP6V1C2  | 0.007447 | 0.362148 | 0.035334 | 0.972166 | 0.990467 | -6.50083 |
| CHPT1     | 0.016358 | -0.24844 | 0.035311 | 0.972184 | 0.990467 | -6.50083 |
| FAM95B1   | 0.00788  | -0.11971 | 0.035267 | 0.972218 | 0.990467 | -6.50084 |
| TCEB2     | -0.00547 | 0.180544 | -0.03513 | 0.972327 | 0.990526 | -6.50084 |
| TTC28     | 0.014108 | 0.020862 | 0.034712 | 0.972656 | 0.990743 | -6.50086 |
| SHMT1     | -0.01289 | 0.11424  | -0.03467 | 0.972692 | 0.990743 | -6.50086 |
| ZNF175    | 0.010598 | -0.07798 | 0.034462 | 0.972853 | 0.990839 | -6.50086 |
| DNAJC5B   | -0.01035 | 0.045126 | -0.03442 | 0.972887 | 0.990839 | -6.50087 |
| LOC100137 | -0.00929 | -0.12295 | -0.03386 | 0.973323 | 0.991231 | -6.50089 |
| RPL17     | -0.01647 | -0.83169 | -0.03348 | 0.973629 | 0.991439 | -6.5009  |
| ZW10      | 0.005382 | -0.30103 | 0.033279 | 0.973784 | 0.991546 | -6.50091 |
| LTBP2     | 0.005174 | -0.01294 | 0.033123 | 0.973907 | 0.991568 | -6.50091 |
| GHR       | -0.00937 | -0.14006 | -0.03249 | 0.974409 | 0.991878 | -6.50093 |
| OXNAD1    | -0.01098 | -0.07733 | -0.03248 | 0.974414 | 0.991878 | -6.50093 |
| RPP21     | 0.00653  | 0.165819 | 0.032045 | 0.974756 | 0.992123 | -6.50095 |
| PRAF2     | -0.00449 | 0.11487  | -0.03138 | 0.975281 | 0.992555 | -6.50097 |
| RNF183    | 0.007721 | -0.08328 | 0.031068 | 0.975525 | 0.992752 | -6.50098 |
| DET1      | -0.00981 | -0.02104 | -0.03058 | 0.975909 | 0.993046 | -6.50099 |
| SUMO1     | 0.007589 | 0.141592 | 0.030573 | 0.975916 | 0.993046 | -6.50099 |
| RHEBL1    | -0.00507 | -0.05144 | -0.03039 | 0.976057 | 0.993138 | -6.501   |
| OR7E14P   | -0.00614 | -0.20891 | -0.03016 | 0.976238 | 0.993271 | -6.50101 |
| LOC100507 | 0.009972 | 0.304531 | 0.029857 | 0.976479 | 0.993465 | -6.50102 |
| ABCC9     | 0.006942 | -0.08103 | 0.029458 | 0.976793 | 0.993733 | -6.50103 |
| PCP2      | -0.00644 | 0.125919 | -0.02931 | 0.976913 | 0.993803 | -6.50103 |
| LOC728765 | -0.00834 | -0.00848 | -0.02882 | 0.977295 | 0.994139 | -6.50105 |
| PCDHB13   | -0.01128 | -0.06449 | -0.02821 | 0.977779 | 0.994529 | -6.50107 |
| RIMS3     | 0.006178 | 0.119128 | 0.027898 | 0.978022 | 0.994673 | -6.50108 |
| LSMD1     | 0.005869 | -0.19732 | 0.027264 | 0.978522 | 0.994974 | -6.50109 |
| NDUFA13   | -0.00491 | 0.027066 | -0.02694 | 0.978775 | 0.99518  | -6.5011  |
| UTRN      | -0.0049  | 0.084664 | -0.0268  | 0.978887 | 0.995242 | -6.50111 |
| STRBP     | 0.01027  | 0.258963 | 0.026609 | 0.979037 | 0.995307 | -6.50111 |
| IFT122    | 0.004503 | 0.181301 | 0.026589 | 0.979053 | 0.995307 | -6.50111 |
| MRPL10    | 0.004018 | -0.07857 | 0.026456 | 0.979157 | 0.995362 | -6.50112 |
| C21orf2   | -0.00612 | 0.237932 | -0.02622 | 0.979347 | 0.995454 | -6.50112 |
| TRIM68    | 0.00564  | -0.04427 | 0.026198 | 0.979361 | 0.995454 | -6.50112 |

|           |          |          |          |          |          |          |
|-----------|----------|----------|----------|----------|----------|----------|
| WDR3      | 0.011282 | 0.442075 | 0.026148 | 0.9794   | 0.995454 | -6.50112 |
| TTLL6     | 0.004975 | 0.01597  | 0.025807 | 0.979669 | 0.995676 | -6.50113 |
| GLP2R     | -0.00505 | -0.12316 | -0.02554 | 0.979876 | 0.995835 | -6.50114 |
| GRIA2     | 0.001704 | 0.020991 | 0.024846 | 0.980426 | 0.996341 | -6.50116 |
| CACNA1B   | 0.005506 | -0.13658 | 0.024458 | 0.980731 | 0.996583 | -6.50117 |
| MLH3      | 0.010637 | 0.331305 | 0.024314 | 0.980845 | 0.996583 | -6.50117 |
| SLC7A6OS  | 0.007522 | 0.232251 | 0.024287 | 0.980866 | 0.996583 | -6.50117 |
| TSGA13    | -0.008   | -0.10507 | -0.02377 | 0.981271 | 0.99682  | -6.50118 |
| CCDC85B   | 0.005646 | 0.015936 | 0.023744 | 0.981294 | 0.99682  | -6.50119 |
| NDUFA2    | -0.00477 | -0.03149 | -0.02373 | 0.981304 | 0.99682  | -6.50119 |
| GAMT      | 0.007446 | 0.167534 | 0.023455 | 0.981521 | 0.996989 | -6.50119 |
| BLMH      | 0.004794 | 0.165364 | 0.023309 | 0.981636 | 0.997052 | -6.5012  |
| DHPS      | 0.00337  | 0.113901 | 0.023248 | 0.981684 | 0.997052 | -6.5012  |
| FLJ33630  | -0.00833 | 0.074079 | -0.02316 | 0.981757 | 0.997074 | -6.5012  |
| MAGEA11   | 0.004944 | -0.11163 | 0.022405 | 0.982349 | 0.997611 | -6.50122 |
| SIRT2     | -0.0028  | 0.184009 | -0.02235 | 0.982388 | 0.997611 | -6.50122 |
| LOC44105  | 0.006875 | 0.118772 | 0.021842 | 0.982792 | 0.99797  | -6.50123 |
| RBM28     | -0.00336 | 0.197451 | -0.02166 | 0.982934 | 0.998063 | -6.50123 |
| TMEM161   | -0.00521 | 0.432739 | -0.0214  | 0.98314  | 0.998168 | -6.50124 |
| RRN3      | -0.00755 | 0.115144 | -0.02075 | 0.983652 | 0.998563 | -6.50125 |
| DDX1      | -0.0039  | -0.2051  | -0.02047 | 0.983869 | 0.998682 | -6.50126 |
| RPGRIP1L  | 0.006295 | -0.0877  | 0.02037  | 0.983952 | 0.998682 | -6.50126 |
| UBIAD1    | -0.00479 | 0.208367 | -0.02028 | 0.984021 | 0.9987   | -6.50126 |
| GTF3C5    | -0.00248 | -0.00697 | -0.01997 | 0.984265 | 0.998896 | -6.50127 |
| ZNF497    | -0.00307 | -0.06525 | -0.01959 | 0.984565 | 0.999097 | -6.50128 |
| IRF5      | -0.0098  | 0.244507 | -0.01937 | 0.984738 | 0.999205 | -6.50128 |
| TOMM22    | 0.003495 | -0.13017 | 0.019318 | 0.98478  | 0.999205 | -6.50128 |
| RHBDF1    | -0.0034  | 0.09893  | -0.01926 | 0.984824 | 0.999205 | -6.50128 |
| C20orf194 | 0.006929 | 0.207956 | 0.019017 | 0.985017 | 0.999349 | -6.50129 |
| ZMYND12   | 0.00321  | 0.115105 | 0.018637 | 0.985317 | 0.999601 | -6.5013  |
| MAK16     | 0.004779 | -0.15269 | 0.018377 | 0.985522 | 0.999705 | -6.5013  |
| SUSD1     | 0.003381 | -0.03797 | 0.017797 | 0.985978 | 1        | -6.50131 |
| PIAS3     | -0.00196 | -0.00879 | -0.01779 | 0.985981 | 1        | -6.50131 |
| CECR5     | 0.00329  | 0.015475 | 0.017531 | 0.986188 | 1        | -6.50132 |
| ABL1      | -0.00399 | 0.120564 | -0.0172  | 0.986452 | 1        | -6.50132 |
| EFR3A     | 0.003402 | -0.4959  | 0.017018 | 0.986592 | 1        | -6.50133 |
| LAMA1     | 0.005131 | 0.114429 | 0.016926 | 0.986665 | 1        | -6.50133 |
| DUT       | -0.00551 | -0.01538 | -0.0169  | 0.986685 | 1        | -6.50133 |
| MED10     | 0.003034 | -0.11031 | 0.016666 | 0.986869 | 1        | -6.50133 |
| ANXA9     | -0.00493 | 0.055688 | -0.0163  | 0.987155 | 1        | -6.50134 |
| C19orf56  | -0.00259 | 0.150751 | -0.01539 | 0.987875 | 1        | -6.50135 |
| C17orf81  | -0.00538 | -0.17249 | -0.01532 | 0.987927 | 1        | -6.50135 |
| TRIM3     | 0.005718 | 0.802341 | 0.015248 | 0.987986 | 1        | -6.50136 |
| FAM129B   | -0.00439 | 0.248073 | -0.01507 | 0.98813  | 1        | -6.50136 |
| KCNMB2    | -0.00433 | -0.16199 | -0.01487 | 0.988282 | 1        | -6.50136 |
| HPGDS     | -0.00166 | -0.1174  | -0.01483 | 0.988318 | 1        | -6.50136 |
| RBM24     | -0.00162 | -0.03703 | -0.01447 | 0.988601 | 1        | -6.50137 |



|           |          |          |          |          |   |          |
|-----------|----------|----------|----------|----------|---|----------|
| FANCB     | 0.002329 | -0.25186 | 0.013669 | 0.98923  | 1 | -6.50138 |
| DOCK7     | -0.00512 | -0.01656 | -0.0135  | 0.989364 | 1 | -6.50138 |
| PRICKLE4  | -0.00204 | -0.03012 | -0.01318 | 0.989619 | 1 | -6.50139 |
| PARS2     | 0.001676 | 0.216102 | 0.012245 | 0.990352 | 1 | -6.5014  |
| SLC4A7    | -0.00362 | 0.193028 | -0.01222 | 0.990372 | 1 | -6.5014  |
| D2HGDH    | -0.0021  | -0.0427  | -0.01155 | 0.9909   | 1 | -6.50141 |
| HES6      | -0.00422 | 0.178646 | -0.01144 | 0.990987 | 1 | -6.50141 |
| GPR3      | -0.002   | -0.16827 | -0.01122 | 0.991163 | 1 | -6.50141 |
| CARD10    | 0.001692 | -0.20657 | 0.010938 | 0.991382 | 1 | -6.50141 |
| PMP2      | 0.002304 | -0.13405 | 0.010815 | 0.991479 | 1 | -6.50141 |
| BICD2     | 0.003396 | 0.387974 | 0.010694 | 0.991575 | 1 | -6.50142 |
| THUMPD2   | -0.00277 | 0.101339 | -0.01069 | 0.991576 | 1 | -6.50142 |
| REXO2     | 0.00243  | 0.154043 | 0.010619 | 0.991634 | 1 | -6.50142 |
| PRMT6     | -0.00339 | -0.21957 | -0.01047 | 0.991747 | 1 | -6.50142 |
| LOC100506 | 0.003115 | -0.1384  | 0.010304 | 0.991881 | 1 | -6.50142 |
| IER3IP1   | -0.00247 | 0.014408 | -0.01024 | 0.991935 | 1 | -6.50142 |
| REV3L     | 0.001772 | -0.23919 | 0.009995 | 0.992125 | 1 | -6.50142 |
| DENND4A   | 0.001912 | -0.24738 | 0.009951 | 0.99216  | 1 | -6.50142 |
| CLTB      | -0.00235 | 0.210786 | -0.00987 | 0.992223 | 1 | -6.50142 |
| YBX1      | -0.00289 | 0.117009 | -0.00974 | 0.992328 | 1 | -6.50143 |
| MAPK1IP1  | 0.005011 | 0.503952 | 0.009713 | 0.992347 | 1 | -6.50143 |
| LOC375196 | -0.00385 | 0.318154 | -0.00957 | 0.992459 | 1 | -6.50143 |
| KIAA1549  | -0.0017  | 0.005358 | -0.00947 | 0.992538 | 1 | -6.50143 |
| PFKP      | 0.002435 | 0.112786 | 0.009415 | 0.992582 | 1 | -6.50143 |
| TRMT5     | -0.00241 | -0.01826 | -0.00932 | 0.99266  | 1 | -6.50143 |
| LCE3B     | 0.001407 | -0.16854 | 0.009094 | 0.992835 | 1 | -6.50143 |
| ASXL3     | 0.000501 | -0.0001  | 0.008857 | 0.993022 | 1 | -6.50143 |
| LOC100655 | 0.004087 | -0.35169 | 0.008786 | 0.993077 | 1 | -6.50144 |
| AQP1      | -0.00431 | 0.152974 | -0.00848 | 0.99332  | 1 | -6.50144 |
| PODXL2    | 0.003913 | 0.319938 | 0.008456 | 0.993338 | 1 | -6.50144 |
| MESDC1    | -0.00106 | -0.14451 | -0.00716 | 0.994358 | 1 | -6.50145 |
| ARMCX6    | -0.00118 | 0.112694 | -0.00709 | 0.994414 | 1 | -6.50145 |
| ABCE1     | 0.00222  | -0.44965 | 0.00705  | 0.994445 | 1 | -6.50145 |
| UPF1      | -0.00193 | 0.25604  | -0.00679 | 0.994654 | 1 | -6.50145 |
| LILRB5    | 0.001478 | 0.060959 | 0.006724 | 0.994702 | 1 | -6.50145 |
| FAM50A    | -0.00072 | 0.062795 | -0.00656 | 0.994833 | 1 | -6.50145 |
| NOP58     | 0.001598 | 0.136734 | 0.00648  | 0.994894 | 1 | -6.50145 |
| NUBP1     | 0.001162 | 0.134966 | 0.00615  | 0.995154 | 1 | -6.50146 |
| PCSK6     | 0.002253 | 0.608477 | 0.004588 | 0.996385 | 1 | -6.50146 |
| SUN5      | -0.00113 | -0.0434  | -0.00454 | 0.996425 | 1 | -6.50146 |
| NME9      | -0.00204 | 0.21412  | -0.00411 | 0.996764 | 1 | -6.50147 |
| STX1A     | 0.001563 | 0.538098 | 0.003972 | 0.996871 | 1 | -6.50147 |
| PRR14L    | -0.00069 | 0.078433 | -0.00376 | 0.997035 | 1 | -6.50147 |
| TRMT11    | -0.00115 | 0.005293 | -0.00358 | 0.997178 | 1 | -6.50147 |
| KIAA1239  | -0.0004  | -0.00024 | -0.00348 | 0.997255 | 1 | -6.50147 |
| PNRC1     | -0.0007  | 0.093585 | -0.00298 | 0.99765  | 1 | -6.50147 |
| PDGFA     | -0.00128 | 0.058984 | -0.00272 | 0.997859 | 1 | -6.50147 |

|          |          |          |          |          |   |          |
|----------|----------|----------|----------|----------|---|----------|
| NPAS3    | -0.00041 | 0.011929 | -0.00256 | 0.997983 | 1 | -6.50147 |
| CTDSP2   | -0.00051 | 0.133243 | -0.00231 | 0.99818  | 1 | -6.50147 |
| SURF4    | -0.00074 | 0.110576 | -0.0023  | 0.998188 | 1 | -6.50147 |
| TMF1     | -0.00019 | -0.02365 | -0.00227 | 0.998209 | 1 | -6.50147 |
| MORN5    | 0.000736 | -0.45693 | 0.002094 | 0.99835  | 1 | -6.50147 |
| LRRN1    | -0.00028 | 0.036299 | -0.00204 | 0.998391 | 1 | -6.50147 |
| RRP8     | 0.000238 | 0.083266 | 0.001575 | 0.998759 | 1 | -6.50147 |
| MRPL38   | 0.000382 | 0.380632 | 0.001486 | 0.998829 | 1 | -6.50147 |
| SLCO3A1  | -0.00051 | 0.34828  | -0.00141 | 0.998887 | 1 | -6.50147 |
| HLA-H    | -0.00036 | 0.040849 | -0.00134 | 0.998944 | 1 | -6.50147 |
| DEFB119  | 0.000254 | -0.23578 | 0.000965 | 0.99924  | 1 | -6.50147 |
| ZNF511   | 0.000103 | -0.05183 | 0.000599 | 0.999528 | 1 | -6.50147 |
| MNDA     | 0.000126 | -0.10112 | 0.000388 | 0.999694 | 1 | -6.50147 |
| ZNF99    | 0        | 0        | 0        | 1        | 1 | -6.50147 |
| ZNF708   | 0        | 0        | 0        | 1        | 1 | -6.50147 |
| ZNF471   | 0        | 0        | 0        | 1        | 1 | -6.50147 |
| ZNF432   | 0        | 0        | 0        | 1        | 1 | -6.50147 |
| ZNF334   | 0        | 0        | 0        | 1        | 1 | -6.50147 |
| ZNF229   | 0        | 0        | 0        | 1        | 1 | -6.50147 |
| ZIC2     | 0        | 0        | 0        | 1        | 1 | -6.50147 |
| ZFP30    | 0        | 0        | 0        | 1        | 1 | -6.50147 |
| ZC3H7B   | 0        | 0        | 0        | 1        | 1 | -6.50147 |
| XKR6     | 0        | 0        | 0        | 1        | 1 | -6.50147 |
| WNT16    | 0        | 0        | 0        | 1        | 1 | -6.50147 |
| WDR17    | 0        | 0        | 0        | 1        | 1 | -6.50147 |
| WASF3    | 0        | 0        | 0        | 1        | 1 | -6.50147 |
| VSTM2A   | 0        | 0        | 0        | 1        | 1 | -6.50147 |
| USH2A    | 0        | 0        | 0        | 1        | 1 | -6.50147 |
| UGT2A3   | 0        | 0        | 0        | 1        | 1 | -6.50147 |
| UBE2CBP  | 0        | 0        | 0        | 1        | 1 | -6.50147 |
| TUBB2B   | 0        | 0        | 0        | 1        | 1 | -6.50147 |
| TTY4C    | 0        | 0        | 0        | 1        | 1 | -6.50147 |
| TTY15    | 0        | 0        | 0        | 1        | 1 | -6.50147 |
| TSPAN12  | 0        | 0        | 0        | 1        | 1 | -6.50147 |
| TRIM23   | 0        | 0        | 0        | 1        | 1 | -6.50147 |
| TRHDE    | 0        | 0        | 0        | 1        | 1 | -6.50147 |
| TRDN     | 0        | 0        | 0        | 1        | 1 | -6.50147 |
| TMEM56   | 0        | 0        | 0        | 1        | 1 | -6.50147 |
| TMEM22   | 0        | 0        | 0        | 1        | 1 | -6.50147 |
| TLR8-AS1 | 0        | 0        | 0        | 1        | 1 | -6.50147 |
| TBC1D24  | 0        | 0        | 0        | 1        | 1 | -6.50147 |
| STRN3    | 0        | 0        | 0        | 1        | 1 | -6.50147 |
| ST8SIA4  | 0        | 0        | 0        | 1        | 1 | -6.50147 |
| SPRYD7   | 0        | 0        | 0        | 1        | 1 | -6.50147 |
| SNX31    | 0        | 0        | 0        | 1        | 1 | -6.50147 |
| SLITRK5  | 0        | 0        | 0        | 1        | 1 | -6.50147 |
| SLIT1    | 0        | 0        | 0        | 1        | 1 | -6.50147 |

|          |   |   |   |   |   |          |
|----------|---|---|---|---|---|----------|
| SLC25A36 | 0 | 0 | 0 | 1 | 1 | -6.50147 |
| SLC19A3  | 0 | 0 | 0 | 1 | 1 | -6.50147 |
| SLC16A12 | 0 | 0 | 0 | 1 | 1 | -6.50147 |
| SLC13A1  | 0 | 0 | 0 | 1 | 1 | -6.50147 |
| SF3A1    | 0 | 0 | 0 | 1 | 1 | -6.50147 |
| SENP6    | 0 | 0 | 0 | 1 | 1 | -6.50147 |
| SCML2    | 0 | 0 | 0 | 1 | 1 | -6.50147 |
| SCD5     | 0 | 0 | 0 | 1 | 1 | -6.50147 |
| RBMXL3   | 0 | 0 | 0 | 1 | 1 | -6.50147 |
| RAVER2   | 0 | 0 | 0 | 1 | 1 | -6.50147 |
| RACGAP1  | 0 | 0 | 0 | 1 | 1 | -6.50147 |
| PYGO1    | 0 | 0 | 0 | 1 | 1 | -6.50147 |
| PRRX2    | 0 | 0 | 0 | 1 | 1 | -6.50147 |
| PRRX1    | 0 | 0 | 0 | 1 | 1 | -6.50147 |
| PRO2214  | 0 | 0 | 0 | 1 | 1 | -6.50147 |
| PRND     | 0 | 0 | 0 | 1 | 1 | -6.50147 |
| POFUT1   | 0 | 0 | 0 | 1 | 1 | -6.50147 |
| PNPO     | 0 | 0 | 0 | 1 | 1 | -6.50147 |
| PLSCR2   | 0 | 0 | 0 | 1 | 1 | -6.50147 |
| PKHD1    | 0 | 0 | 0 | 1 | 1 | -6.50147 |
| PIH2     | 0 | 0 | 0 | 1 | 1 | -6.50147 |
| PHYHIPL  | 0 | 0 | 0 | 1 | 1 | -6.50147 |
| PHLPP1   | 0 | 0 | 0 | 1 | 1 | -6.50147 |
| PHACTR2  | 0 | 0 | 0 | 1 | 1 | -6.50147 |
| PDZRN3   | 0 | 0 | 0 | 1 | 1 | -6.50147 |
| PCDHGB6  | 0 | 0 | 0 | 1 | 1 | -6.50147 |
| PCDHB19P | 0 | 0 | 0 | 1 | 1 | -6.50147 |
| PCDH7    | 0 | 0 | 0 | 1 | 1 | -6.50147 |
| PBX1     | 0 | 0 | 0 | 1 | 1 | -6.50147 |
| PARP4    | 0 | 0 | 0 | 1 | 1 | -6.50147 |
| PACRGL   | 0 | 0 | 0 | 1 | 1 | -6.50147 |
| OVOL1    | 0 | 0 | 0 | 1 | 1 | -6.50147 |
| OR2L13   | 0 | 0 | 0 | 1 | 1 | -6.50147 |
| ODF2L    | 0 | 0 | 0 | 1 | 1 | -6.50147 |
| OCR1     | 0 | 0 | 0 | 1 | 1 | -6.50147 |
| NPPC     | 0 | 0 | 0 | 1 | 1 | -6.50147 |
| NPHP4    | 0 | 0 | 0 | 1 | 1 | -6.50147 |
| NPEPL1   | 0 | 0 | 0 | 1 | 1 | -6.50147 |
| NHLRC2   | 0 | 0 | 0 | 1 | 1 | -6.50147 |
| NARG2    | 0 | 0 | 0 | 1 | 1 | -6.50147 |
| MTHFD2L  | 0 | 0 | 0 | 1 | 1 | -6.50147 |
| MBL2     | 0 | 0 | 0 | 1 | 1 | -6.50147 |
| Mar-04   | 0 | 0 | 0 | 1 | 1 | -6.50147 |
| MAGEB3   | 0 | 0 | 0 | 1 | 1 | -6.50147 |
| LYRM7    | 0 | 0 | 0 | 1 | 1 | -6.50147 |
| LUM      | 0 | 0 | 0 | 1 | 1 | -6.50147 |
| LRRIQ1   | 0 | 0 | 0 | 1 | 1 | -6.50147 |

|           |   |   |   |   |   |          |
|-----------|---|---|---|---|---|----------|
| LRRC2     | 0 | 0 | 0 | 1 | 1 | -6.50147 |
| LRP5L     | 0 | 0 | 0 | 1 | 1 | -6.50147 |
| LRP12     | 0 | 0 | 0 | 1 | 1 | -6.50147 |
| LOX       | 0 | 0 | 0 | 1 | 1 | -6.50147 |
| LOC729652 | 0 | 0 | 0 | 1 | 1 | -6.50147 |
| LOC286072 | 0 | 0 | 0 | 1 | 1 | -6.50147 |
| LOC100509 | 0 | 0 | 0 | 1 | 1 | -6.50147 |
| LOC100507 | 0 | 0 | 0 | 1 | 1 | -6.50147 |
| LOC100507 | 0 | 0 | 0 | 1 | 1 | -6.50147 |
| LOC100507 | 0 | 0 | 0 | 1 | 1 | -6.50147 |
| LOC100506 | 0 | 0 | 0 | 1 | 1 | -6.50147 |
| LOC100506 | 0 | 0 | 0 | 1 | 1 | -6.50147 |
| LOC100509 | 0 | 0 | 0 | 1 | 1 | -6.50147 |
| LOC100499 | 0 | 0 | 0 | 1 | 1 | -6.50147 |
| LOC100287 | 0 | 0 | 0 | 1 | 1 | -6.50147 |
| LOC100190 | 0 | 0 | 0 | 1 | 1 | -6.50147 |
| LOC100137 | 0 | 0 | 0 | 1 | 1 | -6.50147 |
| LOC100129 | 0 | 0 | 0 | 1 | 1 | -6.50147 |
| LMO3      | 0 | 0 | 0 | 1 | 1 | -6.50147 |
| LINGO1    | 0 | 0 | 0 | 1 | 1 | -6.50147 |
| LINC00472 | 0 | 0 | 0 | 1 | 1 | -6.50147 |
| LINC00304 | 0 | 0 | 0 | 1 | 1 | -6.50147 |
| LINC00114 | 0 | 0 | 0 | 1 | 1 | -6.50147 |
| LCE1B     | 0 | 0 | 0 | 1 | 1 | -6.50147 |
| KRTAP4-3  | 0 | 0 | 0 | 1 | 1 | -6.50147 |
| KRT78     | 0 | 0 | 0 | 1 | 1 | -6.50147 |
| KRT38     | 0 | 0 | 0 | 1 | 1 | -6.50147 |
| KIAA1383  | 0 | 0 | 0 | 1 | 1 | -6.50147 |
| KIAA0825  | 0 | 0 | 0 | 1 | 1 | -6.50147 |
| KCNH2     | 0 | 0 | 0 | 1 | 1 | -6.50147 |
| IQCF1     | 0 | 0 | 0 | 1 | 1 | -6.50147 |
| IPPK      | 0 | 0 | 0 | 1 | 1 | -6.50147 |
| IL8       | 0 | 0 | 0 | 1 | 1 | -6.50147 |
| IGF1      | 0 | 0 | 0 | 1 | 1 | -6.50147 |
| HRH4      | 0 | 0 | 0 | 1 | 1 | -6.50147 |
| HIGD1A    | 0 | 0 | 0 | 1 | 1 | -6.50147 |
| HERC3     | 0 | 0 | 0 | 1 | 1 | -6.50147 |
| GUSBP3    | 0 | 0 | 0 | 1 | 1 | -6.50147 |
| GRK7      | 0 | 0 | 0 | 1 | 1 | -6.50147 |
| GPR85     | 0 | 0 | 0 | 1 | 1 | -6.50147 |
| GALC      | 0 | 0 | 0 | 1 | 1 | -6.50147 |
| GABRG2    | 0 | 0 | 0 | 1 | 1 | -6.50147 |
| FLJ37201  | 0 | 0 | 0 | 1 | 1 | -6.50147 |
| FBXL17    | 0 | 0 | 0 | 1 | 1 | -6.50147 |
| FAM84B    | 0 | 0 | 0 | 1 | 1 | -6.50147 |
| FAM70A    | 0 | 0 | 0 | 1 | 1 | -6.50147 |
| FAM65C    | 0 | 0 | 0 | 1 | 1 | -6.50147 |

|           |   |   |   |   |   |          |
|-----------|---|---|---|---|---|----------|
| FAM59A    | 0 | 0 | 0 | 1 | 1 | -6.50147 |
| FAM13C    | 0 | 0 | 0 | 1 | 1 | -6.50147 |
| FAM135A   | 0 | 0 | 0 | 1 | 1 | -6.50147 |
| EXOC6B    | 0 | 0 | 0 | 1 | 1 | -6.50147 |
| ESF1      | 0 | 0 | 0 | 1 | 1 | -6.50147 |
| ERBB2     | 0 | 0 | 0 | 1 | 1 | -6.50147 |
| DZIP1L    | 0 | 0 | 0 | 1 | 1 | -6.50147 |
| DST       | 0 | 0 | 0 | 1 | 1 | -6.50147 |
| DSCR10    | 0 | 0 | 0 | 1 | 1 | -6.50147 |
| DPY19L4   | 0 | 0 | 0 | 1 | 1 | -6.50147 |
| DAGLA     | 0 | 0 | 0 | 1 | 1 | -6.50147 |
| CYSLTR1   | 0 | 0 | 0 | 1 | 1 | -6.50147 |
| CXorf1    | 0 | 0 | 0 | 1 | 1 | -6.50147 |
| CXCL12    | 0 | 0 | 0 | 1 | 1 | -6.50147 |
| CRKL      | 0 | 0 | 0 | 1 | 1 | -6.50147 |
| CRISP3    | 0 | 0 | 0 | 1 | 1 | -6.50147 |
| CRIM1     | 0 | 0 | 0 | 1 | 1 | -6.50147 |
| COMMD6    | 0 | 0 | 0 | 1 | 1 | -6.50147 |
| CNTNAP3   | 0 | 0 | 0 | 1 | 1 | -6.50147 |
| CHRD12    | 0 | 0 | 0 | 1 | 1 | -6.50147 |
| CENPK     | 0 | 0 | 0 | 1 | 1 | -6.50147 |
| CD34      | 0 | 0 | 0 | 1 | 1 | -6.50147 |
| CCDC68    | 0 | 0 | 0 | 1 | 1 | -6.50147 |
| CAV2      | 0 | 0 | 0 | 1 | 1 | -6.50147 |
| CASQ2     | 0 | 0 | 0 | 1 | 1 | -6.50147 |
| C7orf73   | 0 | 0 | 0 | 1 | 1 | -6.50147 |
| C6orf164  | 0 | 0 | 0 | 1 | 1 | -6.50147 |
| C3orf80   | 0 | 0 | 0 | 1 | 1 | -6.50147 |
| C14orf126 | 0 | 0 | 0 | 1 | 1 | -6.50147 |
| C12orf63  | 0 | 0 | 0 | 1 | 1 | -6.50147 |
| C11orf1   | 0 | 0 | 0 | 1 | 1 | -6.50147 |
| BEND2     | 0 | 0 | 0 | 1 | 1 | -6.50147 |
| BBS5      | 0 | 0 | 0 | 1 | 1 | -6.50147 |
| BAG4      | 0 | 0 | 0 | 1 | 1 | -6.50147 |
| APLF      | 0 | 0 | 0 | 1 | 1 | -6.50147 |
| AP1S2     | 0 | 0 | 0 | 1 | 1 | -6.50147 |
| ANKS1B    | 0 | 0 | 0 | 1 | 1 | -6.50147 |
| ANKRD31   | 0 | 0 | 0 | 1 | 1 | -6.50147 |
| AKR1D1    | 0 | 0 | 0 | 1 | 1 | -6.50147 |
| ADH6      | 0 | 0 | 0 | 1 | 1 | -6.50147 |
| ADAM12    | 0 | 0 | 0 | 1 | 1 | -6.50147 |
| ACE       | 0 | 0 | 0 | 1 | 1 | -6.50147 |
| ABCC13    | 0 | 0 | 0 | 1 | 1 | -6.50147 |
