# Supplementary material for: Integrative Analysis of Clinical and Bioinformatics Databases to Reveal the Role of Peripheral Innate Immunity in Kawasaki Disease
Source: Hindawi journal article supplement (doi:10.1155/2023/6699050), 2023-11-14
Supplement: f1 [file 6699050.f1.zip]

x

- 1 B2M
- 2 CALR
- 3 CANX
- 4 CD1C
- 5 CD1D
- 6 CD4
- 7 CD8A
- 8 CD8B
- 9 CD74
- 10 CREB1
- 11 CTSB
- 12 CTSL
- 13 CTSS
- 14 FCER1G
- 15 FCGRT
- 16 PDIA3
- 17 HLA-A
- 18 HLA-B
- 19 HLA-C
- 20 HLA-DMA
- 21 HLA-DMB
- 22 HLA-DOA
- 23 HLA-DOB
- 24 HLA-DPA1
- 25 HLA-DPB1
- 26 HLA-DQA1
- 27 HLA-DQA2
- 28 HLA-DQB1
- 29 HLA-DRA
- 30 HLA-DRB1
- 31 HLA-DRB5
- 32 HLA-E
- 33 HLA-F
- 34 HSPA1A
- 35 HSPA4
- 36 HSPA5
- 37 HSPA6
- 38 MAPK1
- 39 CYBB
- 40 ISG20
- 41 BCL3
- 42 LRP1
- 43 STAT3
- 44 STAT1
- 45 SOCS3
- 46 TNFSF10

47 IRF1  
48 CD40  
49 PPIA  
50 ZYX  
51 ISG15  
52 TNFAIP3  
53 F2R  
54 LYZ  
55 CCL5  
56 CYLD  
57 CSRP1  
58 MAPK14  
59 JUN  
60 IRF5  
61 CCR6  
62 TLR8  
63 GNLY  
64 CD81  
65 CACYBP  
66 BST2  
67 BPHL  
68 GRN  
69 GNAI1  
70 ADAR  
71 TYK2  
72 TPT1  
73 AHNAK  
74 TLR1  
75 TK2  
76 PRDX2  
77 MX2  
78 TCF7L2  
79 NFKBIZ  
80 ROBO3  
81 SP1  
82 SOD1  
83 SLC11A1  
84 DCK  
85 DAXX  
86 CCL4  
87 LIMS1  
88 APOBEC3H  
89 MARCO  
90 CSK  
91 KLRK1  
92 JUND  
93 JAK1

94 IRF7  
95 ILK  
96 IL18  
97 LTB4R  
98 APOBEC3A  
99 TRIM27  
100 RELA  
101 IL7R  
102 IFNAR2  
103 SYTL1  
104 APOBEC3C  
105 DDX17  
106 CD40LG  
107 CD14  
108 TRIM22  
109 PPP4C  
110 HMOX1  
111 HMGB1  
112 HDAC1  
113 PLSCR1  
114 BACH2  
115 TANK  
116 ARRB1  
117 TBK1  
118 AQP9  
119 FASLG  
120 BIRC5  
121 ANXA6  
122 VIM  
123 PRDX1  
124 GBP2  
125 OAS1  
126 UNC93B1  
127 TNFSF4  
128 ACTG1  
129 CCR7  
130 CCR10  
131 CCL3  
132 CCL4L2  
133 XCL1  
134 CCR1  
135 XCL2  
136 CXCR4  
137 IL1B  
138 PTK2B  
139 LTBP1  
140 FGR

141 MIF  
142 JAK2  
143 PTK2  
144 PTGDR  
145 CD86  
146 HCK  
147 GRK2  
148 TXK  
149 RNASE2  
150 CD79A  
151 CD79B  
152 LYN  
153 SYK  
154 BTK  
155 BLNK  
156 VAV3  
157 RAC1  
158 RAC2  
159 RAC3  
160 PPP3CA  
161 PPP3CC  
162 CHP1  
163 NFATC2  
164 NFATC3  
165 KRAS  
166 IGHG1  
167 IGHG2  
168 IGHG3  
169 IGHG4  
170 IGHM  
171 IGHV3-21  
172 IGHV3-23  
173 IGHV3-30  
174 IGHV3-33  
175 IGHV3-48  
176 IGHV3-64  
177 IGHV3-7  
178 IGHV4-34  
179 IGHV4-39  
180 IGHV4-59  
181 IGHV6-1  
182 IGKC  
183 IGKV1-16  
184 IGKV1-17  
185 IGKV1-39  
186 IGKV1-5  
187 IGKV1-6

188 IGKV1-8  
189 IGKV1-9  
190 IGKV1D-39  
191 IGKV3-11  
192 IGKV3-15  
193 IGKV3-20  
194 IGKV4-1  
195 IGLC2  
196 IGLC3  
197 IGLV1-44  
198 IGLV1-47  
199 IGLV1-51  
200 IGLV2-11  
201 IGLV2-14  
202 IGLV3-1  
203 IGLV6-57  
204 CKLF  
205 CXCL16  
206 PF4  
207 PF4V1  
208 PPBP  
209 PROK2  
210 SBDS  
211 SEMA4A  
212 SEMA4B  
213 SEMA4D  
214 TYMP  
215 C5AR1  
216 CCR9  
217 CX3CR1  
218 CXCR3  
219 CXCR5  
220 CYSLTR1  
221 FPR1  
222 FPR2  
223 CXCR2  
224 PLAUR  
225 PLXNB2  
226 PLXNC1  
227 PLXND1  
228 PTAFR  
229 ADM  
230 MANF  
231 AVP  
232 BMP8B  
233 MYDGF  
234 CAT

235 CD320  
236 ADA2  
237 CLEC11A  
238 CMTM2  
239 CMTM3  
240 CMTM5  
241 CMTM6  
242 CMTM7  
243 EREG  
244 FAM3C  
245 FLT3LG  
246 GMFG  
247 GPI  
248 IL16  
249 IL1RN  
250 IL32  
251 IL6ST  
252 LTB  
253 MDK  
254 NAMPT  
255 NENF  
256 PDGFA  
257 PDGFD  
258 PNOC  
259 RABEP1  
260 RABEP2  
261 RETN  
262 S100A6  
263 SECTM1  
264 TGFB1  
265 TNFSF13  
266 TNFSF13B  
267 TNFSF14  
268 TOR2A  
269 UTS2  
270 ADIPOR1  
271 ADRB2  
272 C3AR1  
273 CALCRL  
274 CRLF3  
275 CSF1R  
276 CSF2RA  
277 CSF2RB  
278 CSF3R  
279 ENG  
280 EPOR  
281 FLT3

282 IFNAR1  
283 IFNGR1  
284 IFNGR2  
285 IGF2R  
286 IL10RA  
287 IL12RB1  
288 IL13RA1  
289 IL2RB  
290 IL17RA  
291 IL17RE  
292 IL18R1  
293 IL18RAP  
294 IL1R2  
295 IL27RA  
296 IL2RG  
297 IL3RA  
298 IL4R  
299 IL6R  
300 LTBR  
301 NPR3  
302 NR1H2  
303 NR3C1  
304 NR4A1  
305 OGFR  
306 PTGER2  
307 PTGER4  
308 RARA  
309 RORA  
310 RXRA  
311 S1PR1  
312 SORT1  
313 TGFBR1  
314 TGFBR2  
315 TGFBR3  
316 TNFRSF10C  
317 TNFRSF13B  
318 TNFRSF13C  
319 TNFRSF14  
320 TNFRSF17  
321 TNFRSF18  
322 TNFRSF1A  
323 TNFRSF1B  
324 TNFRSF25  
325 TNFRSF4  
326 TNFRSF8  
327 KIR3DL1  
328 KIR3DL2

329 KIR2DL1  
330 KIR2DL3  
331 KLRC1  
332 KLRC2  
333 KLRC3  
334 KLRD1  
335 PTPN6  
336 ICAM1  
337 ICAM2  
338 ITGAL  
339 ITGB2  
340 PAK1  
341 TYROBP  
342 LCK  
343 FCGR3A  
344 FCGR3B  
345 NCR1  
346 NCR3  
347 CD247  
348 ZAP70  
349 LCP2  
350 LAT  
351 PLCG1  
352 PLCG2  
353 SH3BP2  
354 PIK3CD  
355 PIK3R5  
356 PIK3R1  
357 FYN  
358 GRB2  
359 FOS  
360 IKBKG  
361 NFKBIA  
362 NFKBIB  
363 CD28  
364 ICOS  
365 MAP3K8  
366 CBL  
367 CBLB  
368 CDK4  
369 RASGRP1  
370 PDK1  
371 PRKCQ  
372 TRAC  
373 TRAV8-3  
374 TRBC1  
375 TRBC2



376 TRDC  
377 TRDV2  
378 TRGV9  
379 TRGV2  
380 TRGC2  
381 TRGC1
