# Supplementary material for: Integrative Analysis of Clinical and Bioinformatics Databases to Reveal the Role of Peripheral Innate Immunity in Kawasaki Disease
Source: Hindawi journal article supplement (doi:10.1155/2023/6699050), 2023-11-14
Supplement: f1 [file 6699050.f1.zip]

Archive with 17 entries (17 files):
- Dissolution_Cure_of_RT-qPCR_Experimental_Genes.DOCX
- Fig S1.pdf
- Fig S2 CD34-hspcell.pdf
- Fig S2 CD38-plasmacell.pdf
- Fig S2 CD3D-Tcell.pdf
- Fig S2 HBB-erythrocyte.pdf
- Fig S2 LYZ-myeloidcell.pdf
- Fig S2 MS4A1-Bcell.pdf
- Fig S2 PPBP-platelet.pdf
- Fig S3 CD14-CD14+CD16-monocytecell.pdf
- Fig S3 FCGR3A-CD14-CD16+monocytecell.pdf
- Fig S3 LILRA4-pDCcell.pdf
- Supplementary figure and table captions.docx
- Table_S1_all_marker-celltype-deg.pdf
- Table_S2_381-IRG.pdf
- Table_S3_gse18606_DEG_IRG_289.pdf
- Table_S4_GSE18606-deg-Respond_nonrespond_Acute.pdf
