# Supplementary material for: Integrative Analysis of Clinical and Bioinformatics Databases to Reveal the Role of Peripheral Innate Immunity in Kawasaki Disease
Source: Hindawi journal article supplement (doi:10.1155/2023/6699050), 2023-11-14
Supplement: f1 [file 6699050.f1.zip]

| X           | p_val | avg_log2F(pct.1 | pct.2 | p_val_adj | cluster | gene                |
|-------------|-------|-----------------|-------|-----------|---------|---------------------|
| 1 S100A8    | 0     | 7.821237        | 0.917 | 0.155     | 0       | Myeloid ce S100A8   |
| 2 S100A9    | 0     | 7.210535        | 0.955 | 0.132     | 0       | Myeloid ce S100A9   |
| 3 S100A12   | 0     | 5.672288        | 0.697 | 0.039     | 0       | Myeloid ce S100A12  |
| 4 LYZ       | 0     | 5.181012        | 0.918 | 0.034     | 0       | Myeloid ce LYZ      |
| 5 CST3      | 0     | 5.030543        | 0.908 | 0.048     | 0       | Myeloid ce CST3     |
| 6 SERPINA1  | 0     | 4.191397        | 0.935 | 0.01      | 0       | Myeloid ce SERPINA1 |
| 7 FCN1      | 0     | 4.034717        | 0.896 | 0.007     | 0       | Myeloid ce FCN1     |
| 8 LST1      | 0     | 3.930572        | 0.939 | 0.073     | 0       | Myeloid ce LST1     |
| 9 TYROBP    | 0     | 3.92864         | 0.993 | 0.104     | 0       | Myeloid ce TYROBP   |
| 10 FOS      | 0     | 3.877522        | 0.691 | 0.038     | 0       | Myeloid ce FOS      |
| 11 AIF1     | 0     | 3.809571        | 0.962 | 0.202     | 0       | Myeloid ce AIF1     |
| 12 S100A11  | 0     | 3.766886        | 0.994 | 0.403     | 0       | Myeloid ce S100A11  |
| 13 FCER1G   | 0     | 3.585591        | 0.98  | 0.127     | 0       | Myeloid ce FCER1G   |
| 14 LGALS1   | 0     | 3.456165        | 0.919 | 0.144     | 0       | Myeloid ce LGALS1   |
| 15 S100A6   | 0     | 3.447806        | 0.998 | 0.721     | 0       | Myeloid ce S100A6   |
| 16 SAT1     | 0     | 3.440711        | 0.961 | 0.372     | 0       | Myeloid ce SAT1     |
| 17 STXBP2   | 0     | 3.339519        | 0.883 | 0.099     | 0       | Myeloid ce STXBP2   |
| 18 VCAN     | 0     | 3.211198        | 0.615 | 0.007     | 0       | Myeloid ce VCAN     |
| 19 MNDA     | 0     | 3.207189        | 0.89  | 0.016     | 0       | Myeloid ce MNDA     |
| 20 TYMP     | 0     | 3.197318        | 0.948 | 0.12      | 0       | Myeloid ce TYMP     |
| 21 CD14     | 0     | 3.196552        | 0.678 | 0.005     | 0       | Myeloid ce CD14     |
| 22 IFITM3   | 0     | 3.169006        | 0.931 | 0.502     | 0       | Myeloid ce IFITM3   |
| 23 S100A4   | 0     | 3.159638        | 0.985 | 0.483     | 0       | Myeloid ce S100A4   |
| 24 FTL      | 0     | 3.053355        | 1     | 0.992     | 0       | Myeloid ce FTL      |
| 25 CFD      | 0     | 2.91379         | 0.726 | 0.016     | 0       | Myeloid ce CFD      |
| 26 TSPO     | 0     | 2.885727        | 0.975 | 0.416     | 0       | Myeloid ce TSPO     |
| 27 TMEM176B | 0     | 2.792783        | 0.725 | 0.003     | 0       | Myeloid ce TMEM176B |
| 28 PSAP     | 0     | 2.73608         | 0.914 | 0.346     | 0       | Myeloid ce PSAP     |
| 29 RETN     | 0     | 2.734867        | 0.526 | 0.005     | 0       | Myeloid ce RETN     |
| 30 CTSS     | 0     | 2.733163        | 0.923 | 0.289     | 0       | Myeloid ce CTSS     |
| 31 CD68     | 0     | 2.674124        | 0.754 | 0.021     | 0       | Myeloid ce CD68     |
| 32 TIMP1    | 0     | 2.614491        | 0.827 | 0.162     | 0       | Myeloid ce TIMP1    |
| 33 DUSP1    | 0     | 2.610125        | 0.793 | 0.161     | 0       | Myeloid ce DUSP1    |
| 34 CSF3R    | 0     | 2.609487        | 0.613 | 0.004     | 0       | Myeloid ce CSF3R    |
| 35 NEAT1    | 0     | 2.604553        | 0.876 | 0.256     | 0       | Myeloid ce NEAT1    |
| 36 SMIM25   | 0     | 2.577798        | 0.657 | 0.003     | 0       | Myeloid ce SMIM25   |
| 37 GRN      | 0     | 2.577091        | 0.873 | 0.154     | 0       | Myeloid ce GRN      |
| 38 FTH1     | 0     | 2.553388        | 0.995 | 0.98      | 0       | Myeloid ce FTH1     |
| 39 LILRA5   | 0     | 2.506803        | 0.706 | 0.003     | 0       | Myeloid ce LILRA5   |
| 40 FPR1     | 0     | 2.497933        | 0.759 | 0.003     | 0       | Myeloid ce FPR1     |
| 41 MS4A6A   | 0     | 2.474887        | 0.719 | 0.009     | 0       | Myeloid ce MS4A6A   |
| 42 CSTA     | 0     | 2.462298        | 0.756 | 0.003     | 0       | Myeloid ce CSTA     |
| 43 LGALS3   | 0     | 2.455754        | 0.767 | 0.039     | 0       | Myeloid ce LGALS3   |
| 44 LILRB2   | 0     | 2.437697        | 0.719 | 0.005     | 0       | Myeloid ce LILRB2   |
| 45 SPI1     | 0     | 2.418785        | 0.843 | 0.086     | 0       | Myeloid ce SPI1     |
| 46 COTL1    | 0     | 2.413239        | 0.965 | 0.544     | 0       | Myeloid ce COTL1    |

|             |   |          |       |       |                       |
|-------------|---|----------|-------|-------|-----------------------|
| 47 PLBD1    | 0 | 2.339451 | 0.637 | 0.006 | 0 Myeloid ce PLBD1    |
| 48 IFI30    | 0 | 2.321981 | 0.727 | 0.048 | 0 Myeloid ce IFI30    |
| 49 PYCARD   | 0 | 2.26237  | 0.935 | 0.295 | 0 Myeloid ce PYCARD   |
| 50 S100A10  | 0 | 2.253368 | 0.885 | 0.588 | 0 Myeloid ce S100A10  |
| 51 GCA      | 0 | 2.233257 | 0.756 | 0.134 | 0 Myeloid ce GCA      |
| 52 SRGN     | 0 | 2.196527 | 0.947 | 0.337 | 0 Myeloid ce SRGN     |
| 53 HCK      | 0 | 2.174349 | 0.777 | 0.054 | 0 Myeloid ce HCK      |
| 54 CDA      | 0 | 2.155361 | 0.635 | 0.003 | 0 Myeloid ce CDA      |
| 55 MS4A7    | 0 | 2.144245 | 0.486 | 0.018 | 0 Myeloid ce MS4A7    |
| 56 ANXA2    | 0 | 2.138229 | 0.834 | 0.238 | 0 Myeloid ce ANXA2    |
| 57 SLC11A1  | 0 | 2.132005 | 0.71  | 0.015 | 0 Myeloid ce SLC11A1  |
| 58 NAMPT    | 0 | 2.129793 | 0.523 | 0.087 | 0 Myeloid ce NAMPT    |
| 59 LGALS2   | 0 | 2.128347 | 0.412 | 0.001 | 0 Myeloid ce LGALS2   |
| 60 TMEM176A | 0 | 2.082477 | 0.603 | 0.002 | 0 Myeloid ce TMEM176A |
| 61 CFP      | 0 | 2.068683 | 0.718 | 0.038 | 0 Myeloid ce CFP      |
| 62 RNF130   | 0 | 2.04735  | 0.798 | 0.073 | 0 Myeloid ce RNF130   |
| 63 FGL2     | 0 | 2.046216 | 0.678 | 0.025 | 0 Myeloid ce FGL2     |
| 64 FCGR3A   | 0 | 2.030361 | 0.348 | 0.093 | 0 Myeloid ce FCGR3A   |
| 65 BCL2A1   | 0 | 2.029651 | 0.625 | 0.108 | 0 Myeloid ce BCL2A1   |
| 66 G0S2     | 0 | 2.012416 | 0.136 | 0.003 | 0 Myeloid ce G0S2     |
| 67 TNFSF13B | 0 | 1.987435 | 0.72  | 0.014 | 0 Myeloid ce TNFSF13B |
| 68 RGS2     | 0 | 1.987205 | 0.575 | 0.021 | 0 Myeloid ce RGS2     |
| 69 CYBB     | 0 | 1.981352 | 0.77  | 0.093 | 0 Myeloid ce CYBB     |
| 70 NCF2     | 0 | 1.970695 | 0.722 | 0.016 | 0 Myeloid ce NCF2     |
| 71 CLEC12A  | 0 | 1.970119 | 0.675 | 0.004 | 0 Myeloid ce CLEC12A  |
| 72 PGD      | 0 | 1.969129 | 0.773 | 0.15  | 0 Myeloid ce PGD      |
| 73 IFITM2   | 0 | 1.967302 | 0.954 | 0.81  | 0 Myeloid ce IFITM2   |
| 74 PILRA    | 0 | 1.966571 | 0.625 | 0.003 | 0 Myeloid ce PILRA    |
| 75 TKT      | 0 | 1.917438 | 0.918 | 0.458 | 0 Myeloid ce TKT      |
| 76 HK3      | 0 | 1.903743 | 0.636 | 0.002 | 0 Myeloid ce HK3      |
| 77 FGR      | 0 | 1.901647 | 0.843 | 0.148 | 0 Myeloid ce FGR      |
| 78 LRRC25   | 0 | 1.89718  | 0.634 | 0.014 | 0 Myeloid ce LRRC25   |
| 79 ANXA5    | 0 | 1.895412 | 0.828 | 0.202 | 0 Myeloid ce ANXA5    |
| 80 CPVL     | 0 | 1.829711 | 0.585 | 0.002 | 0 Myeloid ce CPVL     |
| 81 NPC2     | 0 | 1.821415 | 0.8   | 0.247 | 0 Myeloid ce NPC2     |
| 82 VIM      | 0 | 1.818831 | 0.987 | 0.791 | 0 Myeloid ce VIM      |
| 83 TALDO1   | 0 | 1.806753 | 0.914 | 0.429 | 0 Myeloid ce TALDO1   |
| 84 RAB31    | 0 | 1.792863 | 0.7   | 0.035 | 0 Myeloid ce RAB31    |
| 85 FCGRT    | 0 | 1.766785 | 0.765 | 0.14  | 0 Myeloid ce FCGRT    |
| 86 VSIR     | 0 | 1.765559 | 0.884 | 0.343 | 0 Myeloid ce VSIR     |
| 87 MCEMP1   | 0 | 1.752744 | 0.386 | 0.002 | 0 Myeloid ce MCEMP1   |
| 88 C1QA     | 0 | 1.7506   | 0.135 | 0.001 | 0 Myeloid ce C1QA     |
| 89 BLVRB    | 0 | 1.741635 | 0.662 | 0.071 | 0 Myeloid ce BLVRB    |
| 90 C5AR1    | 0 | 1.738937 | 0.515 | 0.002 | 0 Myeloid ce C5AR1    |
| 91 C19orf38 | 0 | 1.737341 | 0.659 | 0.022 | 0 Myeloid ce C19orf38 |
| 92 CTSD     | 0 | 1.732473 | 0.596 | 0.058 | 0 Myeloid ce CTSD     |
| 93 CTSB     | 0 | 1.724184 | 0.738 | 0.167 | 0 Myeloid ce CTSB     |

|     |          |   |          |       |       |   |                     |
|-----|----------|---|----------|-------|-------|---|---------------------|
| 94  | GSTP1    | 0 | 1.709326 | 0.855 | 0.49  | 0 | Myeloid ce GSTP1    |
| 95  | ZFP36    | 0 | 1.690969 | 0.804 | 0.546 | 0 | Myeloid ce ZFP36    |
| 96  | SLC7A7   | 0 | 1.682514 | 0.574 | 0.012 | 0 | Myeloid ce SLC7A7   |
| 97  | DUSP6    | 0 | 1.666922 | 0.538 | 0.015 | 0 | Myeloid ce DUSP6    |
| 98  | IGSF6    | 0 | 1.652825 | 0.602 | 0.003 | 0 | Myeloid ce IGSF6    |
| 99  | MSRB1    | 0 | 1.633253 | 0.597 | 0.053 | 0 | Myeloid ce MSRB1    |
| 100 | AGTRAP   | 0 | 1.626607 | 0.765 | 0.161 | 0 | Myeloid ce AGTRAP   |
| 101 | GABARAP  | 0 | 1.626161 | 0.985 | 0.802 | 0 | Myeloid ce GABARAP  |
| 102 | SOD2     | 0 | 1.614968 | 0.601 | 0.141 | 0 | Myeloid ce SOD2     |
| 103 | MYO1F    | 0 | 1.612363 | 0.722 | 0.101 | 0 | Myeloid ce MYO1F    |
| 104 | LILRB3   | 0 | 1.61034  | 0.565 | 0.002 | 0 | Myeloid ce LILRB3   |
| 105 | GAPDH    | 0 | 1.606652 | 0.994 | 0.89  | 0 | Myeloid ce GAPDH    |
| 106 | APLP2    | 0 | 1.603487 | 0.692 | 0.107 | 0 | Myeloid ce APLP2    |
| 107 | TNFRSF1B | 0 | 1.596696 | 0.664 | 0.092 | 0 | Myeloid ce TNFRSF1B |
| 108 | HMOX1    | 0 | 1.586465 | 0.514 | 0.022 | 0 | Myeloid ce HMOX1    |
| 109 | C4orf48  | 0 | 1.571638 | 0.827 | 0.235 | 0 | Myeloid ce C4orf48  |
| 110 | ALDOA    | 0 | 1.56749  | 0.918 | 0.607 | 0 | Myeloid ce ALDOA    |
| 111 | JAML     | 0 | 1.563104 | 0.689 | 0.11  | 0 | Myeloid ce JAML     |
| 112 | RAC1     | 0 | 1.559954 | 0.911 | 0.445 | 0 | Myeloid ce RAC1     |
| 113 | SERPINB1 | 0 | 1.547383 | 0.843 | 0.397 | 0 | Myeloid ce SERPINB1 |
| 114 | WARS     | 0 | 1.547013 | 0.474 | 0.091 | 0 | Myeloid ce WARS     |
| 115 | CD36     | 0 | 1.545631 | 0.473 | 0.003 | 0 | Myeloid ce CD36     |
| 116 | CPPED1   | 0 | 1.518088 | 0.588 | 0.029 | 0 | Myeloid ce CPPED1   |
| 117 | TUBA1A   | 0 | 1.514713 | 0.746 | 0.38  | 0 | Myeloid ce TUBA1A   |
| 118 | FCGR2A   | 0 | 1.512319 | 0.489 | 0.005 | 0 | Myeloid ce FCGR2A   |
| 119 | NFE2     | 0 | 1.511783 | 0.499 | 0.006 | 0 | Myeloid ce NFE2     |
| 120 | CD63     | 0 | 1.510757 | 0.705 | 0.17  | 0 | Myeloid ce CD63     |
| 121 | ASGR1    | 0 | 1.510574 | 0.482 | 0.001 | 0 | Myeloid ce ASGR1    |
| 122 | SH3BGR13 | 0 | 1.508345 | 0.998 | 0.933 | 0 | Myeloid ce SH3BGR13 |
| 123 | CARD16   | 0 | 1.506411 | 0.837 | 0.336 | 0 | Myeloid ce CARD16   |
| 124 | SLC25A37 | 0 | 1.505639 | 0.411 | 0.072 | 0 | Myeloid ce SLC25A37 |
| 125 | APOBEC3A | 0 | 1.50282  | 0.365 | 0.001 | 0 | Myeloid ce APOBEC3A |
| 126 | ATP6V0B  | 0 | 1.478906 | 0.882 | 0.395 | 0 | Myeloid ce ATP6V0B  |
| 127 | CEBPD    | 0 | 1.468993 | 0.436 | 0.021 | 0 | Myeloid ce CEBPD    |
| 128 | LILRA2   | 0 | 1.462983 | 0.541 | 0.002 | 0 | Myeloid ce LILRA2   |
| 129 | MT2A     | 0 | 1.460082 | 0.666 | 0.319 | 0 | Myeloid ce MT2A     |
| 130 | GLUL     | 0 | 1.458909 | 0.602 | 0.117 | 0 | Myeloid ce GLUL     |
| 131 | OAZ1     | 0 | 1.455491 | 0.997 | 0.931 | 0 | Myeloid ce OAZ1     |
| 132 | NUP214   | 0 | 1.454299 | 0.618 | 0.087 | 0 | Myeloid ce NUP214   |
| 133 | GRINA    | 0 | 1.453205 | 0.724 | 0.195 | 0 | Myeloid ce GRINA    |
| 134 | CSTB     | 0 | 1.443817 | 0.847 | 0.418 | 0 | Myeloid ce CSTB     |
| 135 | CAPG     | 0 | 1.438593 | 0.634 | 0.158 | 0 | Myeloid ce CAPG     |
| 136 | NAIP     | 0 | 1.437328 | 0.465 | 0.023 | 0 | Myeloid ce NAIP     |
| 137 | TCIRG1   | 0 | 1.433767 | 0.753 | 0.191 | 0 | Myeloid ce TCIRG1   |
| 138 | ANXA1    | 0 | 1.425964 | 0.827 | 0.29  | 0 | Myeloid ce ANXA1    |
| 139 | PLAUR    | 0 | 1.408241 | 0.483 | 0.006 | 0 | Myeloid ce PLAUR    |
| 140 | IER2     | 0 | 1.406459 | 0.738 | 0.467 | 0 | Myeloid ce IER2     |

|     |          |   |          |       |       |   |                     |
|-----|----------|---|----------|-------|-------|---|---------------------|
| 141 | HRH2     | 0 | 1.405206 | 0.54  | 0.035 | 0 | Myeloid ce HRH2     |
| 142 | LILRB1   | 0 | 1.404376 | 0.457 | 0.044 | 0 | Myeloid ce LILRB1   |
| 143 | CLU      | 0 | 1.402121 | 0.338 | 0.011 | 0 | Myeloid ce CLU      |
| 144 | PRELID1  | 0 | 1.400808 | 0.841 | 0.47  | 0 | Myeloid ce PRELID1  |
| 145 | TXN      | 0 | 1.391444 | 0.779 | 0.308 | 0 | Myeloid ce TXN      |
| 146 | AP1S2    | 0 | 1.385753 | 0.704 | 0.209 | 0 | Myeloid ce AP1S2    |
| 147 | NINJ1    | 0 | 1.383995 | 0.614 | 0.131 | 0 | Myeloid ce NINJ1    |
| 148 | MPEG1    | 0 | 1.374138 | 0.553 | 0.042 | 0 | Myeloid ce MPEG1    |
| 149 | RHOG     | 0 | 1.371437 | 0.889 | 0.467 | 0 | Myeloid ce RHOG     |
| 150 | JUNB     | 0 | 1.371338 | 0.876 | 0.534 | 0 | Myeloid ce JUNB     |
| 151 | BRI3     | 0 | 1.363085 | 0.57  | 0.069 | 0 | Myeloid ce BRI3     |
| 152 | PRAM1    | 0 | 1.358846 | 0.509 | 0.004 | 0 | Myeloid ce PRAM1    |
| 153 | ZYX      | 0 | 1.356512 | 0.833 | 0.34  | 0 | Myeloid ce ZYX      |
| 154 | PTPRE    | 0 | 1.356103 | 0.586 | 0.076 | 0 | Myeloid ce PTPRE    |
| 155 | CASP1    | 0 | 1.35449  | 0.67  | 0.184 | 0 | Myeloid ce CASP1    |
| 156 | GNAI2    | 0 | 1.347147 | 0.739 | 0.216 | 0 | Myeloid ce GNAI2    |
| 157 | ASAH1    | 0 | 1.346305 | 0.706 | 0.243 | 0 | Myeloid ce ASAH1    |
| 158 | THEMIS2  | 0 | 1.345124 | 0.646 | 0.104 | 0 | Myeloid ce THEMIS2  |
| 159 | GNG5     | 0 | 1.341015 | 0.935 | 0.596 | 0 | Myeloid ce GNG5     |
| 160 | NCF1     | 0 | 1.32837  | 0.845 | 0.44  | 0 | Myeloid ce NCF1     |
| 161 | CSF1R    | 0 | 1.310474 | 0.396 | 0     | 0 | Myeloid ce CSF1R    |
| 162 | RBP7     | 0 | 1.305083 | 0.379 | 0.001 | 0 | Myeloid ce RBP7     |
| 163 | MYL6     | 0 | 1.300706 | 0.998 | 0.941 | 0 | Myeloid ce MYL6     |
| 164 | ITGB2    | 0 | 1.300193 | 0.936 | 0.61  | 0 | Myeloid ce ITGB2    |
| 165 | BID      | 0 | 1.297047 | 0.584 | 0.113 | 0 | Myeloid ce BID      |
| 166 | AP2S1    | 0 | 1.294554 | 0.831 | 0.39  | 0 | Myeloid ce AP2S1    |
| 167 | MAFB     | 0 | 1.294481 | 0.417 | 0.001 | 0 | Myeloid ce MAFB     |
| 168 | LRP1     | 0 | 1.293128 | 0.456 | 0.003 | 0 | Myeloid ce LRP1     |
| 169 | CLEC7A   | 0 | 1.292256 | 0.47  | 0.001 | 0 | Myeloid ce CLEC7A   |
| 170 | PECAM1   | 0 | 1.287496 | 0.577 | 0.122 | 0 | Myeloid ce PECAM1   |
| 171 | TBXAS1   | 0 | 1.284927 | 0.5   | 0.02  | 0 | Myeloid ce TBXAS1   |
| 172 | NCF4     | 0 | 1.281414 | 0.573 | 0.111 | 0 | Myeloid ce NCF4     |
| 173 | ACSL1    | 0 | 1.270421 | 0.326 | 0.016 | 0 | Myeloid ce ACSL1    |
| 174 | C1orf162 | 0 | 1.265445 | 0.793 | 0.314 | 0 | Myeloid ce C1orf162 |
| 175 | FOLR3    | 0 | 1.262283 | 0.275 | 0.001 | 0 | Myeloid ce FOLR3    |
| 176 | TNFAIP2  | 0 | 1.255606 | 0.419 | 0.001 | 0 | Myeloid ce TNFAIP2  |
| 177 | H3F3A    | 0 | 1.253832 | 0.994 | 0.945 | 0 | Myeloid ce H3F3A    |
| 178 | AHNAK    | 0 | 1.237035 | 0.652 | 0.208 | 0 | Myeloid ce AHNAK    |
| 179 | PROK2    | 0 | 1.235147 | 0.131 | 0.005 | 0 | Myeloid ce PROK2    |
| 180 | CYSTM1   | 0 | 1.232223 | 0.352 | 0.035 | 0 | Myeloid ce CYSTM1   |
| 181 | PYGL     | 0 | 1.218035 | 0.4   | 0.004 | 0 | Myeloid ce PYGL     |
| 182 | HSBP1    | 0 | 1.217003 | 0.718 | 0.225 | 0 | Myeloid ce HSBP1    |
| 183 | GLIPR2   | 0 | 1.206603 | 0.63  | 0.143 | 0 | Myeloid ce GLIPR2   |
| 184 | FCGR1A   | 0 | 1.191743 | 0.412 | 0.001 | 0 | Myeloid ce FCGR1A   |
| 185 | SLC31A2  | 0 | 1.186857 | 0.43  | 0.011 | 0 | Myeloid ce SLC31A2  |
| 186 | LYST     | 0 | 1.181149 | 0.578 | 0.114 | 0 | Myeloid ce LYST     |
| 187 | PLEK     | 0 | 1.177668 | 0.662 | 0.182 | 0 | Myeloid ce PLEK     |



|               |   |          |       |       |                         |
|---------------|---|----------|-------|-------|-------------------------|
| 188 BLVRA     | 0 | 1.176042 | 0.509 | 0.054 | 0 Myeloid ce BLVRA      |
| 189 PLSCR1    | 0 | 1.175447 | 0.562 | 0.117 | 0 Myeloid ce PLSCR1     |
| 190 ATP6V0D1  | 0 | 1.173816 | 0.748 | 0.266 | 0 Myeloid ce ATP6V0D1   |
| 191 RHOB      | 0 | 1.170592 | 0.343 | 0.038 | 0 Myeloid ce RHOB       |
| 192 LILRA1    | 0 | 1.16878  | 0.41  | 0.002 | 0 Myeloid ce LILRA1     |
| 193 LYN       | 0 | 1.167612 | 0.655 | 0.184 | 0 Myeloid ce LYN        |
| 194 SMCO4     | 0 | 1.167221 | 0.477 | 0.025 | 0 Myeloid ce SMCO4      |
| 195 ATP6V0C   | 0 | 1.166621 | 0.848 | 0.54  | 0 Myeloid ce ATP6V0C    |
| 196 ZEB2      | 0 | 1.166156 | 0.575 | 0.096 | 0 Myeloid ce ZEB2       |
| 197 ARRB2     | 0 | 1.166108 | 0.795 | 0.362 | 0 Myeloid ce ARRB2      |
| 198 EGR1      | 0 | 1.163326 | 0.239 | 0.003 | 0 Myeloid ce EGR1       |
| 199 CUX1      | 0 | 1.160135 | 0.461 | 0.1   | 0 Myeloid ce CUX1       |
| 200 VAMP5     | 0 | 1.156253 | 0.613 | 0.258 | 0 Myeloid ce VAMP5      |
| 201 VNN2      | 0 | 1.154773 | 0.326 | 0.064 | 0 Myeloid ce VNN2       |
| 202 SDCBP     | 0 | 1.150631 | 0.726 | 0.3   | 0 Myeloid ce SDCBP      |
| 203 CKLF      | 0 | 1.142167 | 0.644 | 0.201 | 0 Myeloid ce CKLF       |
| 204 TNFSF10   | 0 | 1.1408   | 0.577 | 0.193 | 0 Myeloid ce TNFSF10    |
| 205 RNF149    | 0 | 1.137805 | 0.657 | 0.265 | 0 Myeloid ce RNF149     |
| 206 LGALS9    | 0 | 1.130817 | 0.539 | 0.094 | 0 Myeloid ce LGALS9     |
| 207 LCP1      | 0 | 1.127873 | 0.915 | 0.543 | 0 Myeloid ce LCP1       |
| 208 ALDH2     | 0 | 1.127224 | 0.413 | 0.011 | 0 Myeloid ce ALDH2      |
| 209 CTSZ      | 0 | 1.126495 | 0.492 | 0.058 | 0 Myeloid ce CTSZ       |
| 210 C20orf27  | 0 | 1.122551 | 0.591 | 0.166 | 0 Myeloid ce C20orf27   |
| 211 VMP1      | 0 | 1.120975 | 0.579 | 0.147 | 0 Myeloid ce VMP1       |
| 212 BST1      | 0 | 1.118352 | 0.383 | 0.001 | 0 Myeloid ce BST1       |
| 213 FKBP1A    | 0 | 1.112917 | 0.872 | 0.547 | 0 Myeloid ce FKBP1A     |
| 214 LTA4H     | 0 | 1.11232  | 0.683 | 0.307 | 0 Myeloid ce LTA4H      |
| 215 AL034397. | 0 | 1.110809 | 0.413 | 0.038 | 0 Myeloid ce AL034397.3 |
| 216 BLOC1S1   | 0 | 1.105685 | 0.81  | 0.375 | 0 Myeloid ce BLOC1S1    |
| 217 SLC16A3   | 0 | 1.104039 | 0.513 | 0.063 | 0 Myeloid ce SLC16A3    |
| 218 KLF6      | 0 | 1.102928 | 0.693 | 0.272 | 0 Myeloid ce KLF6       |
| 219 CMTM2     | 0 | 1.100079 | 0.106 | 0.001 | 0 Myeloid ce CMTM2      |
| 220 SAMHD1    | 0 | 1.098118 | 0.773 | 0.371 | 0 Myeloid ce SAMHD1     |
| 221 COX8A     | 0 | 1.09794  | 0.902 | 0.577 | 0 Myeloid ce COX8A      |
| 222 GLRX      | 0 | 1.091366 | 0.745 | 0.312 | 0 Myeloid ce GLRX       |
| 223 CYP1B1    | 0 | 1.088214 | 0.267 | 0.001 | 0 Myeloid ce CYP1B1     |
| 224 ARPC1B    | 0 | 1.087219 | 0.856 | 0.43  | 0 Myeloid ce ARPC1B     |
| 225 LAMTOR4   | 0 | 1.077392 | 0.912 | 0.566 | 0 Myeloid ce LAMTOR4    |
| 226 GPBAR1    | 0 | 1.07657  | 0.33  | 0.001 | 0 Myeloid ce GPBAR1     |
| 227 GSTO1     | 0 | 1.06364  | 0.69  | 0.24  | 0 Myeloid ce GSTO1      |
| 228 LY96      | 0 | 1.057316 | 0.475 | 0.065 | 0 Myeloid ce LY96       |
| 229 NFKBIA    | 0 | 1.056409 | 0.595 | 0.294 | 0 Myeloid ce NFKBIA     |
| 230 SULT1A1   | 0 | 1.056308 | 0.408 | 0.036 | 0 Myeloid ce SULT1A1    |
| 231 ANPEP     | 0 | 1.054928 | 0.334 | 0.001 | 0 Myeloid ce ANPEP      |
| 232 RAB24     | 0 | 1.040186 | 0.637 | 0.224 | 0 Myeloid ce RAB24      |
| 233 CDC42EP3  | 0 | 1.035526 | 0.505 | 0.139 | 0 Myeloid ce CDC42EP3   |
| 234 ITGAM     | 0 | 1.034954 | 0.388 | 0.045 | 0 Myeloid ce ITGAM      |

|     |          |   |          |       |       |   |                     |
|-----|----------|---|----------|-------|-------|---|---------------------|
| 235 | CYBA     | 0 | 1.034777 | 0.962 | 0.702 | 0 | Myeloid ce CYBA     |
| 236 | OSCAR    | 0 | 1.032965 | 0.382 | 0.001 | 0 | Myeloid ce OSCAR    |
| 237 | IFNGR2   | 0 | 1.028956 | 0.715 | 0.278 | 0 | Myeloid ce IFNGR2   |
| 238 | STX11    | 0 | 1.028777 | 0.416 | 0.031 | 0 | Myeloid ce STX11    |
| 239 | MS4A4A   | 0 | 1.026797 | 0.325 | 0.001 | 0 | Myeloid ce MS4A4A   |
| 240 | TESC     | 0 | 1.026441 | 0.436 | 0.049 | 0 | Myeloid ce TESC     |
| 241 | GRK2     | 0 | 1.020085 | 0.56  | 0.135 | 0 | Myeloid ce GRK2     |
| 242 | DYSF     | 0 | 1.016102 | 0.278 | 0.004 | 0 | Myeloid ce DYSF     |
| 243 | KCTD12   | 0 | 1.004011 | 0.357 | 0.004 | 0 | Myeloid ce KCTD12   |
| 244 | CD300E   | 0 | 1.003057 | 0.353 | 0.001 | 0 | Myeloid ce CD300E   |
| 245 | ZNF385A  | 0 | 1.001836 | 0.41  | 0.016 | 0 | Myeloid ce ZNF385A  |
| 246 | CEBPB    | 0 | 1.001296 | 0.421 | 0.077 | 0 | Myeloid ce CEBPB    |
| 247 | IL17RA   | 0 | 1.000916 | 0.483 | 0.106 | 0 | Myeloid ce IL17RA   |
| 248 | TNFSF13  | 0 | 1.000555 | 0.412 | 0.016 | 0 | Myeloid ce TNFSF13  |
| 249 | LRRK2    | 0 | 0.999891 | 0.372 | 0.026 | 0 | Myeloid ce LRRK2    |
| 250 | ATP6V1B2 | 0 | 0.998877 | 0.533 | 0.116 | 0 | Myeloid ce ATP6V1B2 |
| 251 | RNASE2   | 0 | 0.998035 | 0.265 | 0.001 | 0 | Myeloid ce RNASE2   |
| 252 | RAB5IF   | 0 | 0.994619 | 0.678 | 0.242 | 0 | Myeloid ce RAB5IF   |
| 253 | MGST1    | 0 | 0.991275 | 0.319 | 0.002 | 0 | Myeloid ce MGST1    |
| 254 | DMXL2    | 0 | 0.99123  | 0.354 | 0.004 | 0 | Myeloid ce DMXL2    |
| 255 | PGLS     | 0 | 0.989779 | 0.797 | 0.417 | 0 | Myeloid ce PGLS     |
| 256 | CDKN1C   | 0 | 0.985196 | 0.204 | 0.002 | 0 | Myeloid ce CDKN1C   |
| 257 | IRAK3    | 0 | 0.981291 | 0.363 | 0.004 | 0 | Myeloid ce IRAK3    |
| 258 | RNH1     | 0 | 0.978689 | 0.687 | 0.338 | 0 | Myeloid ce RNH1     |
| 259 | CLEC4A   | 0 | 0.977334 | 0.383 | 0.014 | 0 | Myeloid ce CLEC4A   |
| 260 | MCL1     | 0 | 0.976918 | 0.68  | 0.312 | 0 | Myeloid ce MCL1     |
| 261 | ADGRE5   | 0 | 0.976016 | 0.599 | 0.232 | 0 | Myeloid ce ADGRE5   |
| 262 | PLP2     | 0 | 0.972156 | 0.691 | 0.332 | 0 | Myeloid ce PLP2     |
| 263 | MXD1     | 0 | 0.970971 | 0.324 | 0.029 | 0 | Myeloid ce MXD1     |
| 264 | CAST     | 0 | 0.961751 | 0.719 | 0.311 | 0 | Myeloid ce CAST     |
| 265 | TLN1     | 0 | 0.959809 | 0.617 | 0.194 | 0 | Myeloid ce TLN1     |
| 266 | CLIC1    | 0 | 0.959406 | 0.956 | 0.665 | 0 | Myeloid ce CLIC1    |
| 267 | DOK3     | 0 | 0.953316 | 0.414 | 0.04  | 0 | Myeloid ce DOK3     |
| 268 | GLIPR1   | 0 | 0.952648 | 0.598 | 0.184 | 0 | Myeloid ce GLIPR1   |
| 269 | PAK1     | 0 | 0.952114 | 0.452 | 0.073 | 0 | Myeloid ce PAK1     |
| 270 | DYNLT1   | 0 | 0.950675 | 0.661 | 0.242 | 0 | Myeloid ce DYNLT1   |
| 271 | FLNA     | 0 | 0.949994 | 0.728 | 0.305 | 0 | Myeloid ce FLNA     |
| 272 | RTN3     | 0 | 0.947339 | 0.522 | 0.138 | 0 | Myeloid ce RTN3     |
| 273 | LILRA6   | 0 | 0.946857 | 0.356 | 0.001 | 0 | Myeloid ce LILRA6   |
| 274 | NOP10    | 0 | 0.945692 | 0.844 | 0.499 | 0 | Myeloid ce NOP10    |
| 275 | EFHD2    | 0 | 0.943742 | 0.521 | 0.104 | 0 | Myeloid ce EFHD2    |
| 276 | CD300C   | 0 | 0.943134 | 0.372 | 0.005 | 0 | Myeloid ce CD300C   |
| 277 | LAMTOR1  | 0 | 0.941104 | 0.757 | 0.407 | 0 | Myeloid ce LAMTOR1  |
| 278 | NUDT16   | 0 | 0.939826 | 0.444 | 0.051 | 0 | Myeloid ce NUDT16   |
| 279 | CD302    | 0 | 0.939779 | 0.365 | 0.003 | 0 | Myeloid ce CD302    |
| 280 | NADK     | 0 | 0.93475  | 0.475 | 0.084 | 0 | Myeloid ce NADK     |
| 281 | CTSL     | 0 | 0.934446 | 0.254 | 0.022 | 0 | Myeloid ce CTSL     |

|                |   |          |       |       |                         |
|----------------|---|----------|-------|-------|-------------------------|
| 282 ELOB       | 0 | 0.934211 | 0.939 | 0.727 | 0 Myeloid ce ELOB       |
| 283 ATG3       | 0 | 0.933007 | 0.622 | 0.245 | 0 Myeloid ce ATG3       |
| 284 PLXDC2     | 0 | 0.929637 | 0.346 | 0.003 | 0 Myeloid ce PLXDC2     |
| 285 PTAFR      | 0 | 0.92808  | 0.314 | 0.004 | 0 Myeloid ce PTAFR      |
| 286 ARPC5      | 0 | 0.927393 | 0.884 | 0.591 | 0 Myeloid ce ARPC5      |
| 287 FBP1       | 0 | 0.924792 | 0.348 | 0.032 | 0 Myeloid ce FBP1       |
| 288 AQP9       | 0 | 0.922272 | 0.261 | 0.001 | 0 Myeloid ce AQP9       |
| 289 CNPY3      | 0 | 0.922047 | 0.782 | 0.408 | 0 Myeloid ce CNPY3      |
| 290 ALOX5      | 0 | 0.918108 | 0.55  | 0.13  | 0 Myeloid ce ALOX5      |
| 291 CTSH       | 0 | 0.918024 | 0.522 | 0.11  | 0 Myeloid ce CTSH       |
| 292 LILRB4     | 0 | 0.917318 | 0.361 | 0.012 | 0 Myeloid ce LILRB4     |
| 293 RAB11FIP1  | 0 | 0.916066 | 0.409 | 0.059 | 0 Myeloid ce RAB11FIP1  |
| 294 ZNF106     | 0 | 0.913388 | 0.515 | 0.13  | 0 Myeloid ce ZNF106     |
| 295 PRKCD      | 0 | 0.911116 | 0.471 | 0.082 | 0 Myeloid ce PRKCD      |
| 296 UBE2D1     | 0 | 0.906945 | 0.541 | 0.15  | 0 Myeloid ce UBE2D1     |
| 297 HSPA6      | 0 | 0.906703 | 0.3   | 0.006 | 0 Myeloid ce HSPA6      |
| 298 WSB1       | 0 | 0.902767 | 0.659 | 0.289 | 0 Myeloid ce WSB1       |
| 299 TMEM167A   | 0 | 0.902388 | 0.543 | 0.155 | 0 Myeloid ce TMEM167A   |
| 300 OAS1       | 0 | 0.901202 | 0.442 | 0.123 | 0 Myeloid ce OAS1       |
| 301 ATOX1      | 0 | 0.899797 | 0.592 | 0.193 | 0 Myeloid ce ATOX1      |
| 302 ARAP1      | 0 | 0.899028 | 0.439 | 0.075 | 0 Myeloid ce ARAP1      |
| 303 RNASET2    | 0 | 0.899024 | 0.842 | 0.571 | 0 Myeloid ce RNASET2    |
| 304 VASP       | 0 | 0.897444 | 0.552 | 0.182 | 0 Myeloid ce VASP       |
| 305 ANXA3      | 0 | 0.896502 | 0.118 | 0.004 | 0 Myeloid ce ANXA3      |
| 306 ADGRE2     | 0 | 0.895588 | 0.326 | 0.001 | 0 Myeloid ce ADGRE2     |
| 307 FES        | 0 | 0.894877 | 0.404 | 0.041 | 0 Myeloid ce FES        |
| 308 GAS7       | 0 | 0.894871 | 0.314 | 0.011 | 0 Myeloid ce GAS7       |
| 309 RAB32      | 0 | 0.88862  | 0.345 | 0.004 | 0 Myeloid ce RAB32      |
| 310 RAB10      | 0 | 0.888023 | 0.58  | 0.193 | 0 Myeloid ce RAB10      |
| 311 PLXNB2     | 0 | 0.885961 | 0.347 | 0.004 | 0 Myeloid ce PLXNB2     |
| 312 FCGR3B     | 0 | 0.885006 | 0.172 | 0.004 | 0 Myeloid ce FCGR3B     |
| 313 PKM        | 0 | 0.884422 | 0.832 | 0.586 | 0 Myeloid ce PKM        |
| 314 ITGAX      | 0 | 0.884349 | 0.339 | 0.02  | 0 Myeloid ce ITGAX      |
| 315 RILPL2     | 0 | 0.883638 | 0.529 | 0.135 | 0 Myeloid ce RILPL2     |
| 316 ZFAND5     | 0 | 0.88307  | 0.487 | 0.143 | 0 Myeloid ce ZFAND5     |
| 317 CD93       | 0 | 0.8812   | 0.294 | 0.003 | 0 Myeloid ce CD93       |
| 318 GRB2       | 0 | 0.880291 | 0.762 | 0.366 | 0 Myeloid ce GRB2       |
| 319 AC005392.2 | 0 | 0.878933 | 0.112 | 0.001 | 0 Myeloid ce AC005392.2 |
| 320 STAB1      | 0 | 0.877953 | 0.262 | 0.001 | 0 Myeloid ce STAB1      |
| 321 CREB5      | 0 | 0.877775 | 0.259 | 0.001 | 0 Myeloid ce CREB5      |
| 322 NAGK       | 0 | 0.876404 | 0.494 | 0.117 | 0 Myeloid ce NAGK       |
| 323 TGFBI      | 0 | 0.874906 | 0.321 | 0.001 | 0 Myeloid ce TGFBI      |
| 324 CXCL16     | 0 | 0.873877 | 0.316 | 0.014 | 0 Myeloid ce CXCL16     |
| 325 LRRFIP1    | 0 | 0.873632 | 0.777 | 0.415 | 0 Myeloid ce LRRFIP1    |
| 326 P2RY13     | 0 | 0.873008 | 0.304 | 0.001 | 0 Myeloid ce P2RY13     |
| 327 FAM45A     | 0 | 0.868663 | 0.43  | 0.083 | 0 Myeloid ce FAM45A     |
| 328 CAPNS1     | 0 | 0.866922 | 0.414 | 0.071 | 0 Myeloid ce CAPNS1     |

|     |          |   |          |       |       |   |                     |
|-----|----------|---|----------|-------|-------|---|---------------------|
| 329 | ODF3B    | 0 | 0.865788 | 0.36  | 0.032 | 0 | Myeloid ce ODF3B    |
| 330 | H2AFJ    | 0 | 0.865274 | 0.538 | 0.177 | 0 | Myeloid ce H2AFJ    |
| 331 | RXRA     | 0 | 0.863966 | 0.34  | 0.007 | 0 | Myeloid ce RXRA     |
| 332 | PADI4    | 0 | 0.860556 | 0.261 | 0.032 | 0 | Myeloid ce PADI4    |
| 333 | EIF4EBP1 | 0 | 0.859874 | 0.434 | 0.083 | 0 | Myeloid ce EIF4EBP1 |
| 334 | STX10    | 0 | 0.859203 | 0.602 | 0.219 | 0 | Myeloid ce STX10    |
| 335 | SNX10    | 0 | 0.855952 | 0.501 | 0.112 | 0 | Myeloid ce SNX10    |
| 336 | GNB2     | 0 | 0.853645 | 0.741 | 0.366 | 0 | Myeloid ce GNB2     |
| 337 | CTSA     | 0 | 0.851179 | 0.524 | 0.163 | 0 | Myeloid ce CTSA     |
| 338 | PPP1R15A | 0 | 0.84962  | 0.398 | 0.1   | 0 | Myeloid ce PPP1R15A |
| 339 | IL1R2    | 0 | 0.846973 | 0.108 | 0.001 | 0 | Myeloid ce IL1R2    |
| 340 | ARPC3    | 0 | 0.845991 | 0.976 | 0.898 | 0 | Myeloid ce ARPC3    |
| 341 | EMP3     | 0 | 0.845722 | 0.917 | 0.773 | 0 | Myeloid ce EMP3     |
| 342 | ACTB     | 0 | 0.845089 | 1     | 0.999 | 0 | Myeloid ce ACTB     |
| 343 | PARVG    | 0 | 0.843247 | 0.678 | 0.287 | 0 | Myeloid ce PARVG    |
| 344 | GNS      | 0 | 0.842529 | 0.37  | 0.04  | 0 | Myeloid ce GNS      |
| 345 | SERF2    | 0 | 0.840374 | 0.995 | 0.986 | 0 | Myeloid ce SERF2    |
| 346 | LTBR     | 0 | 0.839717 | 0.346 | 0.003 | 0 | Myeloid ce LTBR     |
| 347 | CCR1     | 0 | 0.837671 | 0.283 | 0.005 | 0 | Myeloid ce CCR1     |
| 348 | UBXN11   | 0 | 0.837389 | 0.444 | 0.094 | 0 | Myeloid ce UBXN11   |
| 349 | CD33     | 0 | 0.83723  | 0.335 | 0.001 | 0 | Myeloid ce CD33     |
| 350 | ATG16L2  | 0 | 0.836048 | 0.46  | 0.117 | 0 | Myeloid ce ATG16L2  |
| 351 | H2AFY    | 0 | 0.833643 | 0.653 | 0.284 | 0 | Myeloid ce H2AFY    |
| 352 | CMTM6    | 0 | 0.833452 | 0.639 | 0.286 | 0 | Myeloid ce CMTM6    |
| 353 | LAMTOR2  | 0 | 0.82887  | 0.635 | 0.257 | 0 | Myeloid ce LAMTOR2  |
| 354 | PGAM1    | 0 | 0.826431 | 0.761 | 0.464 | 0 | Myeloid ce PGAM1    |
| 355 | GYG1     | 0 | 0.825409 | 0.454 | 0.13  | 0 | Myeloid ce GYG1     |
| 356 | TXNDC17  | 0 | 0.824434 | 0.585 | 0.19  | 0 | Myeloid ce TXNDC17  |
| 357 | PLAC8    | 0 | 0.821555 | 0.728 | 0.485 | 0 | Myeloid ce PLAC8    |
| 358 | IQGAP1   | 0 | 0.820315 | 0.638 | 0.255 | 0 | Myeloid ce IQGAP1   |
| 359 | ADM      | 0 | 0.820173 | 0.151 | 0.001 | 0 | Myeloid ce ADM      |
| 360 | SLC2A6   | 0 | 0.816076 | 0.324 | 0.053 | 0 | Myeloid ce SLC2A6   |
| 361 | CREG1    | 0 | 0.815875 | 0.374 | 0.04  | 0 | Myeloid ce CREG1    |
| 362 | CD55     | 0 | 0.813826 | 0.675 | 0.385 | 0 | Myeloid ce CD55     |
| 363 | HSPA1A   | 0 | 0.813394 | 0.419 | 0.125 | 0 | Myeloid ce HSPA1A   |
| 364 | VAMP8    | 0 | 0.810281 | 0.793 | 0.556 | 0 | Myeloid ce VAMP8    |
| 365 | CRTAP    | 0 | 0.809647 | 0.441 | 0.128 | 0 | Myeloid ce CRTAP    |
| 366 | ASGR2    | 0 | 0.808297 | 0.232 | 0.001 | 0 | Myeloid ce ASGR2    |
| 367 | RGS19    | 0 | 0.805122 | 0.718 | 0.369 | 0 | Myeloid ce RGS19    |
| 368 | ATP5MPL  | 0 | 0.8034   | 0.83  | 0.498 | 0 | Myeloid ce ATP5MPL  |
| 369 | CALHM6   | 0 | 0.8033   | 0.52  | 0.187 | 0 | Myeloid ce CALHM6   |
| 370 | METTL9   | 0 | 0.801784 | 0.58  | 0.289 | 0 | Myeloid ce METTL9   |
| 371 | FPR2     | 0 | 0.800622 | 0.267 | 0     | 0 | Myeloid ce FPR2     |
| 372 | HP       | 0 | 0.797974 | 0.173 | 0.001 | 0 | Myeloid ce HP       |
| 373 | KIAA0930 | 0 | 0.796146 | 0.318 | 0.017 | 0 | Myeloid ce KIAA0930 |
| 374 | MYD88    | 0 | 0.795722 | 0.49  | 0.156 | 0 | Myeloid ce MYD88    |
| 375 | NAAA     | 0 | 0.793264 | 0.447 | 0.157 | 0 | Myeloid ce NAAA     |

|              |   |          |       |       |                       |
|--------------|---|----------|-------|-------|-----------------------|
| 376 RARA     | 0 | 0.792609 | 0.382 | 0.067 | 0 Myeloid ce RARA     |
| 377 MYADM    | 0 | 0.791853 | 0.45  | 0.133 | 0 Myeloid ce MYADM    |
| 378 TPI1     | 0 | 0.791325 | 0.845 | 0.592 | 0 Myeloid ce TPI1     |
| 379 FBXL5    | 0 | 0.791116 | 0.554 | 0.208 | 0 Myeloid ce FBXL5    |
| 380 RASSF4   | 0 | 0.787768 | 0.32  | 0.014 | 0 Myeloid ce RASSF4   |
| 381 TIMP2    | 0 | 0.78575  | 0.284 | 0.006 | 0 Myeloid ce TIMP2    |
| 382 SKAP2    | 0 | 0.78057  | 0.455 | 0.102 | 0 Myeloid ce SKAP2    |
| 383 TPM3     | 0 | 0.780564 | 0.921 | 0.704 | 0 Myeloid ce TPM3     |
| 384 MAPKAPK3 | 0 | 0.779169 | 0.474 | 0.135 | 0 Myeloid ce MAPKAPK3 |
| 385 COX5B    | 0 | 0.776838 | 0.918 | 0.737 | 0 Myeloid ce COX5B    |
| 386 BACH1    | 0 | 0.774651 | 0.365 | 0.06  | 0 Myeloid ce BACH1    |
| 387 PPT1     | 0 | 0.774278 | 0.534 | 0.199 | 0 Myeloid ce PPT1     |
| 388 CD86     | 0 | 0.774193 | 0.324 | 0.023 | 0 Myeloid ce CD86     |
| 389 TREM1    | 0 | 0.772508 | 0.254 | 0.002 | 0 Myeloid ce TREM1    |
| 390 SLC8A1   | 0 | 0.771783 | 0.288 | 0.001 | 0 Myeloid ce SLC8A1   |
| 391 COMT     | 0 | 0.76955  | 0.526 | 0.195 | 0 Myeloid ce COMT     |
| 392 NFAM1    | 0 | 0.764156 | 0.285 | 0.001 | 0 Myeloid ce NFAM1    |
| 393 ADA2     | 0 | 0.756246 | 0.416 | 0.102 | 0 Myeloid ce ADA2     |
| 394 PSMB3    | 0 | 0.756107 | 0.8   | 0.472 | 0 Myeloid ce PSMB3    |
| 395 SCPEP1   | 0 | 0.755189 | 0.445 | 0.105 | 0 Myeloid ce SCPEP1   |
| 396 MEGF9    | 0 | 0.754814 | 0.262 | 0.012 | 0 Myeloid ce MEGF9    |
| 397 SH3BP2   | 0 | 0.754661 | 0.409 | 0.08  | 0 Myeloid ce SH3BP2   |
| 398 EVI2B    | 0 | 0.752538 | 0.43  | 0.108 | 0 Myeloid ce EVI2B    |
| 399 JPT1     | 0 | 0.750699 | 0.608 | 0.271 | 0 Myeloid ce JPT1     |
| 400 RASSF2   | 0 | 0.747502 | 0.366 | 0.067 | 0 Myeloid ce RASSF2   |
| 401 KLF4     | 0 | 0.74614  | 0.269 | 0.001 | 0 Myeloid ce KLF4     |
| 402 MPP1     | 0 | 0.744898 | 0.397 | 0.059 | 0 Myeloid ce MPP1     |
| 403 RHOA     | 0 | 0.740222 | 0.948 | 0.864 | 0 Myeloid ce RHOA     |
| 404 QPCT     | 0 | 0.739842 | 0.233 | 0.004 | 0 Myeloid ce QPCT     |
| 405 CR1      | 0 | 0.737655 | 0.24  | 0.044 | 0 Myeloid ce CR1      |
| 406 HACD4    | 0 | 0.733317 | 0.544 | 0.194 | 0 Myeloid ce HACD4    |
| 407 MTPN     | 0 | 0.732105 | 0.668 | 0.314 | 0 Myeloid ce MTPN     |
| 408 RASGRP4  | 0 | 0.7321   | 0.281 | 0.002 | 0 Myeloid ce RASGRP4  |
| 409 SIGLEC9  | 0 | 0.730124 | 0.285 | 0.003 | 0 Myeloid ce SIGLEC9  |
| 410 CD44     | 0 | 0.730017 | 0.719 | 0.403 | 0 Myeloid ce CD44     |
| 411 PLEC     | 0 | 0.729742 | 0.396 | 0.106 | 0 Myeloid ce PLEC     |
| 412 CAMK1    | 0 | 0.725877 | 0.269 | 0.007 | 0 Myeloid ce CAMK1    |
| 413 TLR4     | 0 | 0.724812 | 0.26  | 0.002 | 0 Myeloid ce TLR4     |
| 414 HOTAIRM1 | 0 | 0.722332 | 0.34  | 0.046 | 0 Myeloid ce HOTAIRM1 |
| 415 TNFRSF1A | 0 | 0.721083 | 0.489 | 0.147 | 0 Myeloid ce TNFRSF1A |
| 416 ENY2     | 0 | 0.720079 | 0.612 | 0.275 | 0 Myeloid ce ENY2     |
| 417 GSN      | 0 | 0.717983 | 0.313 | 0.041 | 0 Myeloid ce GSN      |
| 418 GNG10    | 0 | 0.717352 | 0.427 | 0.13  | 0 Myeloid ce GNG10    |
| 419 ATP5F1E  | 0 | 0.71586  | 0.997 | 0.969 | 0 Myeloid ce ATP5F1E  |
| 420 WASF2    | 0 | 0.713593 | 0.695 | 0.365 | 0 Myeloid ce WASF2    |
| 421 HNMT     | 0 | 0.710955 | 0.273 | 0     | 0 Myeloid ce HNMT     |
| 422 NOTCH2   | 0 | 0.707419 | 0.339 | 0.055 | 0 Myeloid ce NOTCH2   |

|               |   |          |       |       |                         |
|---------------|---|----------|-------|-------|-------------------------|
| 423 FMNL1     | 0 | 0.70646  | 0.463 | 0.153 | 0 Myeloid ce FMNL1      |
| 424 LINC01001 | 0 | 0.704987 | 0.217 | 0.009 | 0 Myeloid ce LINC01001  |
| 425 ROGDI     | 0 | 0.704758 | 0.317 | 0.038 | 0 Myeloid ce ROGDI      |
| 426 TGFB1     | 0 | 0.702868 | 0.589 | 0.248 | 0 Myeloid ce TGFB1      |
| 427 CFL1      | 0 | 0.702193 | 0.995 | 0.948 | 0 Myeloid ce CFL1       |
| 428 TLR2      | 0 | 0.701967 | 0.266 | 0.003 | 0 Myeloid ce TLR2       |
| 429 CCPG1     | 0 | 0.701073 | 0.36  | 0.098 | 0 Myeloid ce CCPG1      |
| 430 CNIH4     | 0 | 0.700657 | 0.442 | 0.153 | 0 Myeloid ce CNIH4      |
| 431 CD151     | 0 | 0.697638 | 0.37  | 0.072 | 0 Myeloid ce CD151      |
| 432 RBM47     | 0 | 0.697621 | 0.258 | 0.009 | 0 Myeloid ce RBM47      |
| 433 C9orf72   | 0 | 0.696062 | 0.309 | 0.035 | 0 Myeloid ce C9orf72    |
| 434 RGS18     | 0 | 0.695787 | 0.28  | 0.007 | 0 Myeloid ce RGS18      |
| 435 NFKBIZ    | 0 | 0.692762 | 0.372 | 0.112 | 0 Myeloid ce NFKBIZ     |
| 436 RBPJ      | 0 | 0.690915 | 0.399 | 0.109 | 0 Myeloid ce RBPJ       |
| 437 CFLAR     | 0 | 0.690022 | 0.542 | 0.23  | 0 Myeloid ce CFLAR      |
| 438 CD300LF   | 0 | 0.687012 | 0.263 | 0.001 | 0 Myeloid ce CD300LF    |
| 439 H3F3B     | 0 | 0.686341 | 0.987 | 0.946 | 0 Myeloid ce H3F3B      |
| 440 CD300A    | 0 | 0.685316 | 0.436 | 0.11  | 0 Myeloid ce CD300A     |
| 441 ACTR2     | 0 | 0.684614 | 0.665 | 0.329 | 0 Myeloid ce ACTR2      |
| 442 SEC14L1   | 0 | 0.681338 | 0.409 | 0.125 | 0 Myeloid ce SEC14L1    |
| 443 NAPRT     | 0 | 0.680553 | 0.374 | 0.078 | 0 Myeloid ce NAPRT      |
| 444 ACAP2     | 0 | 0.676226 | 0.674 | 0.35  | 0 Myeloid ce ACAP2      |
| 445 IMPDH1    | 0 | 0.675977 | 0.442 | 0.138 | 0 Myeloid ce IMPDH1     |
| 446 NQO2      | 0 | 0.673097 | 0.313 | 0.056 | 0 Myeloid ce NQO2       |
| 447 MXD3      | 0 | 0.672839 | 0.233 | 0.012 | 0 Myeloid ce MXD3       |
| 448 CKAP4     | 0 | 0.671359 | 0.25  | 0.04  | 0 Myeloid ce CKAP4      |
| 449 AGPAT2    | 0 | 0.671022 | 0.344 | 0.058 | 0 Myeloid ce AGPAT2     |
| 450 BCL6      | 0 | 0.670384 | 0.22  | 0.017 | 0 Myeloid ce BCL6       |
| 451 CCDC88A   | 0 | 0.667894 | 0.277 | 0.029 | 0 Myeloid ce CCDC88A    |
| 452 MBOAT7    | 0 | 0.667746 | 0.271 | 0.032 | 0 Myeloid ce MBOAT7     |
| 453 DOK2      | 0 | 0.666954 | 0.497 | 0.187 | 0 Myeloid ce DOK2       |
| 454 BASP1     | 0 | 0.665775 | 0.183 | 0.038 | 0 Myeloid ce BASP1      |
| 455 NPL       | 0 | 0.663354 | 0.273 | 0.012 | 0 Myeloid ce NPL        |
| 456 AL445524. | 0 | 0.661192 | 0.243 | 0.02  | 0 Myeloid ce AL445524.1 |
| 457 SERP1     | 0 | 0.660541 | 0.922 | 0.757 | 0 Myeloid ce SERP1      |
| 458 SIRPA     | 0 | 0.660103 | 0.224 | 0.001 | 0 Myeloid ce SIRPA      |
| 459 CD48      | 0 | 0.657901 | 0.672 | 0.383 | 0 Myeloid ce CD48       |
| 460 CDKN1A    | 0 | 0.657701 | 0.198 | 0.027 | 0 Myeloid ce CDKN1A     |
| 461 EMILIN2   | 0 | 0.657556 | 0.247 | 0.01  | 0 Myeloid ce EMILIN2    |
| 462 LPCAT2    | 0 | 0.652747 | 0.239 | 0.001 | 0 Myeloid ce LPCAT2     |
| 463 IER3      | 0 | 0.651959 | 0.226 | 0.035 | 0 Myeloid ce IER3       |
| 464 POU2F2    | 0 | 0.650843 | 0.511 | 0.201 | 0 Myeloid ce POU2F2     |
| 465 PLCB2     | 0 | 0.64965  | 0.329 | 0.061 | 0 Myeloid ce PLCB2      |
| 466 ETS2      | 0 | 0.648913 | 0.26  | 0.035 | 0 Myeloid ce ETS2       |
| 467 FAM129A   | 0 | 0.648265 | 0.21  | 0.034 | 0 Myeloid ce FAM129A    |
| 468 CHMP2A    | 0 | 0.647731 | 0.544 | 0.222 | 0 Myeloid ce CHMP2A     |
| 469 CLTA      | 0 | 0.647719 | 0.691 | 0.392 | 0 Myeloid ce CLTA       |

|             |   |          |       |       |                      |
|-------------|---|----------|-------|-------|----------------------|
| 470 MIDN    | 0 | 0.647702 | 0.312 | 0.05  | 0 Myeloid ce MIDN    |
| 471 CD1D    | 0 | 0.647366 | 0.301 | 0.037 | 0 Myeloid ce CD1D    |
| 472 CAPZA2  | 0 | 0.644972 | 0.616 | 0.314 | 0 Myeloid ce CAPZA2  |
| 473 BST2    | 0 | 0.644376 | 0.701 | 0.406 | 0 Myeloid ce BST2    |
| 474 CARS2   | 0 | 0.643866 | 0.297 | 0.054 | 0 Myeloid ce CARS2   |
| 475 UPP1    | 0 | 0.643575 | 0.466 | 0.168 | 0 Myeloid ce UPP1    |
| 476 TPP1    | 0 | 0.643251 | 0.448 | 0.139 | 0 Myeloid ce TPP1    |
| 477 PRR13   | 0 | 0.642137 | 0.865 | 0.631 | 0 Myeloid ce PRR13   |
| 478 RNF24   | 0 | 0.64192  | 0.246 | 0.03  | 0 Myeloid ce RNF24   |
| 479 UBE2R2  | 0 | 0.638818 | 0.324 | 0.058 | 0 Myeloid ce UBE2R2  |
| 480 TPPP3   | 0 | 0.63772  | 0.205 | 0     | 0 Myeloid ce TPPP3   |
| 481 SEC11A  | 0 | 0.637442 | 0.69  | 0.399 | 0 Myeloid ce SEC11A  |
| 482 TCF7L2  | 0 | 0.632345 | 0.217 | 0.005 | 0 Myeloid ce TCF7L2  |
| 483 SCIMP   | 0 | 0.631872 | 0.358 | 0.068 | 0 Myeloid ce SCIMP   |
| 484 COX6B1  | 0 | 0.631347 | 0.944 | 0.797 | 0 Myeloid ce COX6B1  |
| 485 ADAP2   | 0 | 0.631286 | 0.263 | 0.006 | 0 Myeloid ce ADAP2   |
| 486 MARCKS  | 0 | 0.630937 | 0.219 | 0.022 | 0 Myeloid ce MARCKS  |
| 487 RHOC    | 0 | 0.629393 | 0.288 | 0.085 | 0 Myeloid ce RHOC    |
| 488 POMP    | 0 | 0.628647 | 0.732 | 0.43  | 0 Myeloid ce POMP    |
| 489 TMEM205 | 0 | 0.628306 | 0.411 | 0.131 | 0 Myeloid ce TMEM205 |
| 490 LAP3    | 0 | 0.627585 | 0.399 | 0.155 | 0 Myeloid ce LAP3    |
| 491 C3AR1   | 0 | 0.627581 | 0.23  | 0.008 | 0 Myeloid ce C3AR1   |
| 492 JOSD2   | 0 | 0.62681  | 0.407 | 0.122 | 0 Myeloid ce JOSD2   |
| 493 KCNE3   | 0 | 0.625619 | 0.231 | 0.001 | 0 Myeloid ce KCNE3   |
| 494 PTTG1IP | 0 | 0.625474 | 0.404 | 0.113 | 0 Myeloid ce PTTG1IP |
| 495 PLIN3   | 0 | 0.624159 | 0.388 | 0.101 | 0 Myeloid ce PLIN3   |
| 496 APOBR   | 0 | 0.62196  | 0.227 | 0.017 | 0 Myeloid ce APOBR   |
| 497 AGTPBP1 | 0 | 0.619207 | 0.3   | 0.091 | 0 Myeloid ce AGTPBP1 |
| 498 PIK3AP1 | 0 | 0.617804 | 0.338 | 0.064 | 0 Myeloid ce PIK3AP1 |
| 499 REEP5   | 0 | 0.616508 | 0.619 | 0.291 | 0 Myeloid ce REEP5   |
| 500 FCGR1B  | 0 | 0.615763 | 0.22  | 0     | 0 Myeloid ce FCGR1B  |
| 501 SLC43A2 | 0 | 0.615444 | 0.271 | 0.022 | 0 Myeloid ce SLC43A2 |
| 502 CTNNA1  | 0 | 0.615012 | 0.3   | 0.029 | 0 Myeloid ce CTNNA1  |
| 503 ARPC4   | 0 | 0.613532 | 0.365 | 0.103 | 0 Myeloid ce ARPC4   |
| 504 RALB    | 0 | 0.611371 | 0.323 | 0.067 | 0 Myeloid ce RALB    |
| 505 ARPC2   | 0 | 0.610353 | 0.954 | 0.848 | 0 Myeloid ce ARPC2   |
| 506 PICALM  | 0 | 0.610132 | 0.289 | 0.049 | 0 Myeloid ce PICALM  |
| 507 TMEM219 | 0 | 0.609826 | 0.65  | 0.365 | 0 Myeloid ce TMEM219 |
| 508 SHKBP1  | 0 | 0.60948  | 0.622 | 0.319 | 0 Myeloid ce SHKBP1  |
| 509 MYO1G   | 0 | 0.60867  | 0.535 | 0.236 | 0 Myeloid ce MYO1G   |
| 510 MSN     | 0 | 0.608419 | 0.741 | 0.448 | 0 Myeloid ce MSN     |
| 511 NR4A1   | 0 | 0.608255 | 0.179 | 0.006 | 0 Myeloid ce NR4A1   |
| 512 ABI3    | 0 | 0.608127 | 0.365 | 0.15  | 0 Myeloid ce ABI3    |
| 513 NUMB    | 0 | 0.607133 | 0.371 | 0.108 | 0 Myeloid ce NUMB    |
| 514 PDLIM7  | 0 | 0.606541 | 0.237 | 0.025 | 0 Myeloid ce PDLIM7  |
| 515 FERMT3  | 0 | 0.603705 | 0.643 | 0.338 | 0 Myeloid ce FERMT3  |
| 516 ARF5    | 0 | 0.60282  | 0.781 | 0.512 | 0 Myeloid ce ARF5    |

|              |   |          |       |       |                       |
|--------------|---|----------|-------|-------|-----------------------|
| 517 RNF181   | 0 | 0.600931 | 0.633 | 0.318 | 0 Myeloid ce RNF181   |
| 518 UBR4     | 0 | 0.600148 | 0.323 | 0.086 | 0 Myeloid ce UBR4     |
| 519 MFSD1    | 0 | 0.596825 | 0.447 | 0.157 | 0 Myeloid ce MFSD1    |
| 520 IL1B     | 0 | 0.596697 | 0.115 | 0.001 | 0 Myeloid ce IL1B     |
| 521 LTB4R    | 0 | 0.596309 | 0.195 | 0.008 | 0 Myeloid ce LTB4R    |
| 522 MGST2    | 0 | 0.595912 | 0.261 | 0.027 | 0 Myeloid ce MGST2    |
| 523 NAPSA    | 0 | 0.59286  | 0.408 | 0.139 | 0 Myeloid ce NAPSA    |
| 524 GPCPD1   | 0 | 0.591754 | 0.376 | 0.126 | 0 Myeloid ce GPCPD1   |
| 525 SAT2     | 0 | 0.590432 | 0.511 | 0.238 | 0 Myeloid ce SAT2     |
| 526 IL1RN    | 0 | 0.589893 | 0.178 | 0     | 0 Myeloid ce IL1RN    |
| 527 TOM1     | 0 | 0.589249 | 0.327 | 0.084 | 0 Myeloid ce TOM1     |
| 528 GK       | 0 | 0.588938 | 0.211 | 0.028 | 0 Myeloid ce GK       |
| 529 CLEC4E   | 0 | 0.588421 | 0.166 | 0     | 0 Myeloid ce CLEC4E   |
| 530 SERPINB6 | 0 | 0.587123 | 0.382 | 0.095 | 0 Myeloid ce SERPINB6 |
| 531 PLEKHO1  | 0 | 0.585292 | 0.32  | 0.076 | 0 Myeloid ce PLEKHO1  |
| 532 CHP1     | 0 | 0.584572 | 0.266 | 0.036 | 0 Myeloid ce CHP1     |
| 533 HIGD2A   | 0 | 0.583507 | 0.824 | 0.649 | 0 Myeloid ce HIGD2A   |
| 534 S100P    | 0 | 0.582801 | 0.112 | 0.002 | 0 Myeloid ce S100P    |
| 535 LY86     | 0 | 0.58243  | 0.416 | 0.129 | 0 Myeloid ce LY86     |
| 536 NAA38    | 0 | 0.581439 | 0.65  | 0.364 | 0 Myeloid ce NAA38    |
| 537 FAM110A  | 0 | 0.580913 | 0.345 | 0.117 | 0 Myeloid ce FAM110A  |
| 538 IFNGR1   | 0 | 0.580895 | 0.479 | 0.188 | 0 Myeloid ce IFNGR1   |
| 539 CSF2RB   | 0 | 0.58019  | 0.2   | 0.009 | 0 Myeloid ce CSF2RB   |
| 540 UQCR11   | 0 | 0.579721 | 0.916 | 0.726 | 0 Myeloid ce UQCR11   |
| 541 VSTM1    | 0 | 0.579393 | 0.195 | 0     | 0 Myeloid ce VSTM1    |
| 542 VPS29    | 0 | 0.574713 | 0.602 | 0.312 | 0 Myeloid ce VPS29    |
| 543 ABHD5    | 0 | 0.573312 | 0.251 | 0.045 | 0 Myeloid ce ABHD5    |
| 544 CEACAM4  | 0 | 0.572762 | 0.205 | 0.002 | 0 Myeloid ce CEACAM4  |
| 545 SRA1     | 0 | 0.572084 | 0.476 | 0.19  | 0 Myeloid ce SRA1     |
| 546 RAB3D    | 0 | 0.571847 | 0.219 | 0.01  | 0 Myeloid ce RAB3D    |
| 547 PRDX5    | 0 | 0.571715 | 0.78  | 0.508 | 0 Myeloid ce PRDX5    |
| 548 FAM49A   | 0 | 0.571278 | 0.284 | 0.04  | 0 Myeloid ce FAM49A   |
| 549 MTMR11   | 0 | 0.571224 | 0.216 | 0.001 | 0 Myeloid ce MTMR11   |
| 550 QSOX1    | 0 | 0.570998 | 0.264 | 0.053 | 0 Myeloid ce QSOX1    |
| 551 ANKRD13C | 0 | 0.570559 | 0.29  | 0.065 | 0 Myeloid ce ANKRD13D |
| 552 Mar-01   | 0 | 0.569933 | 0.171 | 0.001 | 0 Myeloid ce Mar-01   |
| 553 SLC24A4  | 0 | 0.569607 | 0.208 | 0.001 | 0 Myeloid ce SLC24A4  |
| 554 UBL5     | 0 | 0.5694   | 0.914 | 0.715 | 0 Myeloid ce UBL5     |
| 555 NAGA     | 0 | 0.569386 | 0.261 | 0.024 | 0 Myeloid ce NAGA     |
| 556 IRF5     | 0 | 0.568074 | 0.311 | 0.055 | 0 Myeloid ce IRF5     |
| 557 SYK      | 0 | 0.563565 | 0.466 | 0.145 | 0 Myeloid ce SYK      |
| 558 MOB1A    | 0 | 0.562469 | 0.596 | 0.289 | 0 Myeloid ce MOB1A    |
| 559 PRKAR1A  | 0 | 0.561325 | 0.569 | 0.286 | 0 Myeloid ce PRKAR1A  |
| 560 CARD9    | 0 | 0.560426 | 0.229 | 0.002 | 0 Myeloid ce CARD9    |
| 561 ARRB1    | 0 | 0.559796 | 0.262 | 0.024 | 0 Myeloid ce ARRB1    |
| 562 NCOA4    | 0 | 0.558094 | 0.5   | 0.232 | 0 Myeloid ce NCOA4    |
| 563 C15orf39 | 0 | 0.55542  | 0.267 | 0.047 | 0 Myeloid ce C15orf39 |



|     |           |   |          |       |       |   |                       |
|-----|-----------|---|----------|-------|-------|---|-----------------------|
| 564 | CHST15    | 0 | 0.553668 | 0.225 | 0.015 | 0 | Myeloid ce CHST15     |
| 565 | ATP6V0E1  | 0 | 0.553137 | 0.856 | 0.67  | 0 | Myeloid ce ATP6V0E1   |
| 566 | TMEM91    | 0 | 0.553133 | 0.218 | 0.028 | 0 | Myeloid ce TMEM91     |
| 567 | MAPK14    | 0 | 0.552955 | 0.222 | 0.041 | 0 | Myeloid ce MAPK14     |
| 568 | NRGN      | 0 | 0.551547 | 0.188 | 0.007 | 0 | Myeloid ce NRGN       |
| 569 | RAB27A    | 0 | 0.551127 | 0.324 | 0.103 | 0 | Myeloid ce RAB27A     |
| 570 | TSEN34    | 0 | 0.550311 | 0.385 | 0.136 | 0 | Myeloid ce TSEN34     |
| 571 | APAF1     | 0 | 0.549321 | 0.24  | 0.033 | 0 | Myeloid ce APAF1      |
| 572 | NLRP12    | 0 | 0.549089 | 0.185 | 0     | 0 | Myeloid ce NLRP12     |
| 573 | MAP3K11   | 0 | 0.547748 | 0.327 | 0.086 | 0 | Myeloid ce MAP3K11    |
| 574 | IFI27L2   | 0 | 0.547679 | 0.466 | 0.188 | 0 | Myeloid ce IFI27L2    |
| 575 | SH3GLB1   | 0 | 0.546851 | 0.466 | 0.209 | 0 | Myeloid ce SH3GLB1    |
| 576 | CDH23     | 0 | 0.546816 | 0.201 | 0.006 | 0 | Myeloid ce CDH23      |
| 577 | AC020656. | 0 | 0.546536 | 0.169 | 0.001 | 0 | Myeloid ce AC020656.1 |
| 578 | CARD19    | 0 | 0.546483 | 0.301 | 0.065 | 0 | Myeloid ce CARD19     |
| 579 | SPG21     | 0 | 0.544915 | 0.545 | 0.257 | 0 | Myeloid ce SPG21      |
| 580 | PTPN18    | 0 | 0.542742 | 0.339 | 0.092 | 0 | Myeloid ce PTPN18     |
| 581 | NABP1     | 0 | 0.542263 | 0.177 | 0.04  | 0 | Myeloid ce NABP1      |
| 582 | PNPLA6    | 0 | 0.541971 | 0.276 | 0.052 | 0 | Myeloid ce PNPLA6     |
| 583 | RELT      | 0 | 0.540726 | 0.261 | 0.035 | 0 | Myeloid ce RELT       |
| 584 | PSTPIP2   | 0 | 0.540225 | 0.206 | 0.017 | 0 | Myeloid ce PSTPIP2    |
| 585 | GNB1      | 0 | 0.538936 | 0.325 | 0.093 | 0 | Myeloid ce GNB1       |
| 586 | MAP2K3    | 0 | 0.537854 | 0.461 | 0.19  | 0 | Myeloid ce MAP2K3     |
| 587 | NBPF14    | 0 | 0.537544 | 0.287 | 0.071 | 0 | Myeloid ce NBPF14     |
| 588 | JUND      | 0 | 0.53694  | 0.27  | 0.069 | 0 | Myeloid ce JUND       |
| 589 | EHBP1L1   | 0 | 0.536494 | 0.214 | 0.026 | 0 | Myeloid ce EHBP1L1    |
| 590 | LINC00937 | 0 | 0.535545 | 0.156 | 0.005 | 0 | Myeloid ce LINC00937  |
| 591 | RRBP1     | 0 | 0.534809 | 0.29  | 0.061 | 0 | Myeloid ce RRBP1      |
| 592 | SIGLEC10  | 0 | 0.534742 | 0.244 | 0.043 | 0 | Myeloid ce SIGLEC10   |
| 593 | FAM198B   | 0 | 0.533989 | 0.183 | 0.001 | 0 | Myeloid ce FAM198B    |
| 594 | IL6R      | 0 | 0.533617 | 0.26  | 0.065 | 0 | Myeloid ce IL6R       |
| 595 | FKBP15    | 0 | 0.532305 | 0.279 | 0.05  | 0 | Myeloid ce FKBP15     |
| 596 | PHC2      | 0 | 0.531098 | 0.186 | 0.012 | 0 | Myeloid ce PHC2       |
| 597 | AOAH      | 0 | 0.530807 | 0.375 | 0.098 | 0 | Myeloid ce AOAH       |
| 598 | SUPT4H1   | 0 | 0.530457 | 0.585 | 0.302 | 0 | Myeloid ce SUPT4H1    |
| 599 | UQCRC1    | 0 | 0.527982 | 0.57  | 0.296 | 0 | Myeloid ce UQCRC1     |
| 600 | CES1      | 0 | 0.527934 | 0.162 | 0.009 | 0 | Myeloid ce CES1       |
| 601 | MYOF      | 0 | 0.527781 | 0.201 | 0     | 0 | Myeloid ce MYOF       |
| 602 | PSTPIP1   | 0 | 0.525919 | 0.41  | 0.175 | 0 | Myeloid ce PSTPIP1    |
| 603 | RNASEK    | 0 | 0.525481 | 0.37  | 0.113 | 0 | Myeloid ce RNASEK     |
| 604 | P2RX1     | 0 | 0.525057 | 0.228 | 0.021 | 0 | Myeloid ce P2RX1      |
| 605 | RENBP     | 0 | 0.524558 | 0.272 | 0.049 | 0 | Myeloid ce RENBP      |
| 606 | RTN4      | 0 | 0.52169  | 0.54  | 0.261 | 0 | Myeloid ce RTN4       |
| 607 | GPAT3     | 0 | 0.51995  | 0.183 | 0.003 | 0 | Myeloid ce GPAT3      |
| 608 | CCR2      | 0 | 0.519553 | 0.18  | 0.01  | 0 | Myeloid ce CCR2       |
| 609 | TRIM25    | 0 | 0.519269 | 0.218 | 0.037 | 0 | Myeloid ce TRIM25     |
| 610 | GNAQ      | 0 | 0.518696 | 0.21  | 0.022 | 0 | Myeloid ce GNAQ       |

|     |           |   |          |       |       |   |                        |
|-----|-----------|---|----------|-------|-------|---|------------------------|
| 611 | CD163     | 0 | 0.518465 | 0.163 | 0     | 0 | Myeloid ce CD163       |
| 612 | LINC02432 | 0 | 0.516851 | 0.186 | 0     | 0 | Myeloid ce LINC02432   |
| 613 | KIAA0513  | 0 | 0.514449 | 0.209 | 0.009 | 0 | Myeloid ce KIAA0513    |
| 614 | AC005280. | 0 | 0.512948 | 0.176 | 0.001 | 0 | Myeloid ce AC005280.2  |
| 615 | SULF2     | 0 | 0.512256 | 0.196 | 0.007 | 0 | Myeloid ce SULF2       |
| 616 | DPYD      | 0 | 0.511543 | 0.433 | 0.182 | 0 | Myeloid ce DPYD        |
| 617 | KYNU      | 0 | 0.510149 | 0.27  | 0.039 | 0 | Myeloid ce KYNU        |
| 618 | HEBP1     | 0 | 0.509908 | 0.387 | 0.12  | 0 | Myeloid ce HEBP1       |
| 619 | CDC42EP2  | 0 | 0.509446 | 0.18  | 0.001 | 0 | Myeloid ce CDC42EP2    |
| 620 | PFN1      | 0 | 0.508792 | 0.997 | 0.982 | 0 | Myeloid ce PFN1        |
| 621 | AMPD2     | 0 | 0.507882 | 0.271 | 0.06  | 0 | Myeloid ce AMPD2       |
| 622 | DPYSL2    | 0 | 0.507304 | 0.217 | 0.018 | 0 | Myeloid ce DPYSL2      |
| 623 | FOSL2     | 0 | 0.507253 | 0.195 | 0.021 | 0 | Myeloid ce FOSL2       |
| 624 | ALDH3B1   | 0 | 0.506597 | 0.201 | 0.001 | 0 | Myeloid ce ALDH3B1     |
| 625 | MGST3     | 0 | 0.506012 | 0.486 | 0.219 | 0 | Myeloid ce MGST3       |
| 626 | CLTC      | 0 | 0.505092 | 0.361 | 0.127 | 0 | Myeloid ce CLTC        |
| 627 | SCARB2    | 0 | 0.503047 | 0.246 | 0.041 | 0 | Myeloid ce SCARB2      |
| 628 | JAK2      | 0 | 0.502686 | 0.232 | 0.043 | 0 | Myeloid ce JAK2        |
| 629 | RNF144B   | 0 | 0.50232  | 0.21  | 0.021 | 0 | Myeloid ce RNF144B     |
| 630 | NACC2     | 0 | 0.500549 | 0.174 | 0.006 | 0 | Myeloid ce NACC2       |
| 631 | Mar-01    | 0 | 0.499499 | 0.356 | 0.092 | 0 | Myeloid ce Mar-01      |
| 632 | SHTN1     | 0 | 0.498641 | 0.183 | 0.001 | 0 | Myeloid ce SHTN1       |
| 633 | SIDT2     | 0 | 0.498129 | 0.252 | 0.057 | 0 | Myeloid ce SIDT2       |
| 634 | GLT1D1    | 0 | 0.497616 | 0.164 | 0.001 | 0 | Myeloid ce GLT1D1      |
| 635 | EIF4E2    | 0 | 0.495958 | 0.484 | 0.215 | 0 | Myeloid ce EIF4E2      |
| 636 | GAA       | 0 | 0.495801 | 0.244 | 0.036 | 0 | Myeloid ce GAA         |
| 637 | TNFRSF10C | 0 | 0.493234 | 0.104 | 0.001 | 0 | Myeloid ce TNFRSF10C   |
| 638 | SVIL      | 0 | 0.491269 | 0.243 | 0.05  | 0 | Myeloid ce SVIL        |
| 639 | PLXNC1    | 0 | 0.488567 | 0.2   | 0.019 | 0 | Myeloid ce PLXNC1      |
| 640 | BCKDK     | 0 | 0.488211 | 0.315 | 0.086 | 0 | Myeloid ce BCKDK       |
| 641 | MYO9B     | 0 | 0.488009 | 0.268 | 0.073 | 0 | Myeloid ce MYO9B       |
| 642 | EPN1      | 0 | 0.487302 | 0.428 | 0.178 | 0 | Myeloid ce EPN1        |
| 643 | MIR4435-2 | 0 | 0.48659  | 0.226 | 0.049 | 0 | Myeloid ce MIR4435-2HG |
| 644 | PLPPR2    | 0 | 0.486318 | 0.185 | 0.004 | 0 | Myeloid ce PLPPR2      |
| 645 | SNX27     | 0 | 0.486228 | 0.248 | 0.044 | 0 | Myeloid ce SNX27       |
| 646 | DICER1    | 0 | 0.484444 | 0.273 | 0.076 | 0 | Myeloid ce DICER1      |
| 647 | HLA-DRB1  | 0 | 0.482078 | 0.795 | 0.388 | 0 | Myeloid ce HLA-DRB1    |
| 648 | PFKFB3    | 0 | 0.481803 | 0.165 | 0.038 | 0 | Myeloid ce PFKFB3      |
| 649 | SGK1      | 0 | 0.480429 | 0.148 | 0.019 | 0 | Myeloid ce SGK1        |
| 650 | CAMKK2    | 0 | 0.479717 | 0.212 | 0.031 | 0 | Myeloid ce CAMKK2      |
| 651 | CKB       | 0 | 0.477563 | 0.107 | 0.001 | 0 | Myeloid ce CKB         |
| 652 | PDXK      | 0 | 0.477555 | 0.21  | 0.04  | 0 | Myeloid ce PDXK        |
| 653 | SQOR      | 0 | 0.476734 | 0.256 | 0.063 | 0 | Myeloid ce SQOR        |
| 654 | MIS18BP1  | 0 | 0.475767 | 0.404 | 0.161 | 0 | Myeloid ce MIS18BP1    |
| 655 | LMO2      | 0 | 0.473947 | 0.184 | 0.003 | 0 | Myeloid ce LMO2        |
| 656 | SEMA4A    | 0 | 0.473448 | 0.194 | 0.02  | 0 | Myeloid ce SEMA4A      |
| 657 | LAMP2     | 0 | 0.473176 | 0.274 | 0.071 | 0 | Myeloid ce LAMP2       |

|              |   |          |       |       |                       |
|--------------|---|----------|-------|-------|-----------------------|
| 658 PFKFB4   | 0 | 0.472966 | 0.178 | 0.002 | 0 Myeloid ce PFKFB4   |
| 659 SPTLC2   | 0 | 0.471667 | 0.317 | 0.097 | 0 Myeloid ce SPTLC2   |
| 660 DAPK1    | 0 | 0.471402 | 0.189 | 0.005 | 0 Myeloid ce DAPK1    |
| 661 G6PD     | 0 | 0.471263 | 0.408 | 0.168 | 0 Myeloid ce G6PD     |
| 662 ERICH1   | 0 | 0.47086  | 0.451 | 0.197 | 0 Myeloid ce ERICH1   |
| 663 DDX60L   | 0 | 0.470325 | 0.251 | 0.076 | 0 Myeloid ce DDX60L   |
| 664 ST20     | 0 | 0.470213 | 0.191 | 0.03  | 0 Myeloid ce ST20     |
| 665 GALK1    | 0 | 0.470119 | 0.314 | 0.09  | 0 Myeloid ce GALK1    |
| 666 PKN2     | 0 | 0.469474 | 0.29  | 0.097 | 0 Myeloid ce PKN2     |
| 667 MIIP     | 0 | 0.4694   | 0.398 | 0.151 | 0 Myeloid ce MIIP     |
| 668 STAC3    | 0 | 0.468885 | 0.202 | 0.01  | 0 Myeloid ce STAC3    |
| 669 TET2     | 0 | 0.466765 | 0.202 | 0.028 | 0 Myeloid ce TET2     |
| 670 PLEKHO2  | 0 | 0.465102 | 0.18  | 0.01  | 0 Myeloid ce PLEKHO2  |
| 671 OGFRL1   | 0 | 0.464129 | 0.187 | 0.017 | 0 Myeloid ce OGFRL1   |
| 672 RRP12    | 0 | 0.463961 | 0.199 | 0.028 | 0 Myeloid ce RRP12    |
| 673 DUSP23   | 0 | 0.461373 | 0.363 | 0.125 | 0 Myeloid ce DUSP23   |
| 674 CSF2RA   | 0 | 0.460481 | 0.178 | 0     | 0 Myeloid ce CSF2RA   |
| 675 CEACAM3  | 0 | 0.459774 | 0.15  | 0     | 0 Myeloid ce CEACAM3  |
| 676 QKI      | 0 | 0.459456 | 0.215 | 0.032 | 0 Myeloid ce QKI      |
| 677 STAT2    | 0 | 0.459415 | 0.249 | 0.065 | 0 Myeloid ce STAT2    |
| 678 CYTOR    | 0 | 0.456133 | 0.286 | 0.079 | 0 Myeloid ce CYTOR    |
| 679 PPP1R9B  | 0 | 0.456037 | 0.233 | 0.048 | 0 Myeloid ce PPP1R9B  |
| 680 LRRFIP2  | 0 | 0.456006 | 0.313 | 0.104 | 0 Myeloid ce LRRFIP2  |
| 681 MCOLN1   | 0 | 0.455994 | 0.223 | 0.032 | 0 Myeloid ce MCOLN1   |
| 682 SLC6A6   | 0 | 0.455897 | 0.185 | 0.022 | 0 Myeloid ce SLC6A6   |
| 683 LFNG     | 0 | 0.455368 | 0.209 | 0.029 | 0 Myeloid ce LFNG     |
| 684 COLGALT1 | 0 | 0.454769 | 0.214 | 0.034 | 0 Myeloid ce COLGALT1 |
| 685 TMEM120A | 0 | 0.453405 | 0.322 | 0.105 | 0 Myeloid ce TMEM120A |
| 686 ARHGAP26 | 0 | 0.452816 | 0.17  | 0.018 | 0 Myeloid ce ARHGAP26 |
| 687 CPD      | 0 | 0.450566 | 0.185 | 0.032 | 0 Myeloid ce CPD      |
| 688 SORT1    | 0 | 0.449248 | 0.17  | 0.002 | 0 Myeloid ce SORT1    |
| 689 BATF3    | 0 | 0.448439 | 0.154 | 0.001 | 0 Myeloid ce BATF3    |
| 690 MICU1    | 0 | 0.444649 | 0.268 | 0.07  | 0 Myeloid ce MICU1    |
| 691 RAB20    | 0 | 0.444355 | 0.168 | 0.006 | 0 Myeloid ce RAB20    |
| 692 IFIT3    | 0 | 0.441629 | 0.169 | 0.024 | 0 Myeloid ce IFIT3    |
| 693 DOCK5    | 0 | 0.440553 | 0.166 | 0.004 | 0 Myeloid ce DOCK5    |
| 694 F13A1    | 0 | 0.440108 | 0.152 | 0.005 | 0 Myeloid ce F13A1    |
| 695 NANS     | 0 | 0.438904 | 0.292 | 0.077 | 0 Myeloid ce NANS     |
| 696 SH2B3    | 0 | 0.438479 | 0.196 | 0.015 | 0 Myeloid ce SH2B3    |
| 697 RNPEP    | 0 | 0.438232 | 0.286 | 0.079 | 0 Myeloid ce RNPEP    |
| 698 PPM1F    | 0 | 0.437771 | 0.19  | 0.018 | 0 Myeloid ce PPM1F    |
| 699 COL4A3BP | 0 | 0.43741  | 0.274 | 0.075 | 0 Myeloid ce COL4A3BP |
| 700 MAP3K1   | 0 | 0.43661  | 0.284 | 0.091 | 0 Myeloid ce MAP3K1   |
| 701 MARCO    | 0 | 0.436112 | 0.153 | 0     | 0 Myeloid ce MARCO    |
| 702 TYK2     | 0 | 0.435589 | 0.265 | 0.085 | 0 Myeloid ce TYK2     |
| 703 HEXB     | 0 | 0.434773 | 0.327 | 0.122 | 0 Myeloid ce HEXB     |
| 704 ZNF467   | 0 | 0.434747 | 0.169 | 0.012 | 0 Myeloid ce ZNF467   |

|               |   |          |       |       |                            |
|---------------|---|----------|-------|-------|----------------------------|
| 705 DOCK2     | 0 | 0.434487 | 0.359 | 0.137 | 0 Myeloid ce DOCK2         |
| 706 FFAR2     | 0 | 0.43401  | 0.105 | 0     | 0 Myeloid ce FFAR2         |
| 707 NLRC4     | 0 | 0.433578 | 0.161 | 0.001 | 0 Myeloid ce NLRC4         |
| 708 TTYH3     | 0 | 0.431538 | 0.174 | 0.006 | 0 Myeloid ce TTYH3         |
| 709 FAM120A   | 0 | 0.431382 | 0.25  | 0.071 | 0 Myeloid ce FAM120A       |
| 710 VMA21     | 0 | 0.429215 | 0.36  | 0.134 | 0 Myeloid ce VMA21         |
| 711 DUSP3     | 0 | 0.429183 | 0.19  | 0.017 | 0 Myeloid ce DUSP3         |
| 712 B4GALT5   | 0 | 0.428907 | 0.156 | 0.009 | 0 Myeloid ce B4GALT5       |
| 713 CORO1C    | 0 | 0.4287   | 0.199 | 0.021 | 0 Myeloid ce CORO1C        |
| 714 TBC1D8    | 0 | 0.428436 | 0.175 | 0.003 | 0 Myeloid ce TBC1D8        |
| 715 FAM214B   | 0 | 0.42828  | 0.18  | 0.016 | 0 Myeloid ce FAM214B       |
| 716 MAP3K3    | 0 | 0.428179 | 0.183 | 0.026 | 0 Myeloid ce MAP3K3        |
| 717 SLC15A3   | 0 | 0.428174 | 0.157 | 0.006 | 0 Myeloid ce SLC15A3       |
| 718 ADAM15    | 0 | 0.427895 | 0.228 | 0.046 | 0 Myeloid ce ADAM15        |
| 719 PDK4      | 0 | 0.427454 | 0.158 | 0.003 | 0 Myeloid ce PDK4          |
| 720 SMPDL3A   | 0 | 0.426601 | 0.158 | 0.002 | 0 Myeloid ce SMPDL3A       |
| 721 PREX1     | 0 | 0.425775 | 0.258 | 0.077 | 0 Myeloid ce PREX1         |
| 722 DENND3    | 0 | 0.424854 | 0.192 | 0.034 | 0 Myeloid ce DENND3        |
| 723 ARHGAP27  | 0 | 0.42073  | 0.325 | 0.116 | 0 Myeloid ce ARHGAP27      |
| 724 PTPRJ     | 0 | 0.419495 | 0.2   | 0.031 | 0 Myeloid ce PTPRJ         |
| 725 RNF135    | 0 | 0.419453 | 0.246 | 0.052 | 0 Myeloid ce RNF135        |
| 726 DNAJC5    | 0 | 0.419401 | 0.183 | 0.034 | 0 Myeloid ce DNAJC5        |
| 727 SNX18     | 0 | 0.41921  | 0.233 | 0.048 | 0 Myeloid ce SNX18         |
| 728 KLF10     | 0 | 0.418731 | 0.202 | 0.042 | 0 Myeloid ce KLF10         |
| 729 ACSL4     | 0 | 0.416659 | 0.209 | 0.047 | 0 Myeloid ce ACSL4         |
| 730 RAB34     | 0 | 0.416179 | 0.193 | 0.017 | 0 Myeloid ce RAB34         |
| 731 FAR1      | 0 | 0.415852 | 0.224 | 0.057 | 0 Myeloid ce FAR1          |
| 732 DRAM1     | 0 | 0.413412 | 0.173 | 0.014 | 0 Myeloid ce DRAM1         |
| 733 MBD2      | 0 | 0.413334 | 0.199 | 0.033 | 0 Myeloid ce MBD2          |
| 734 LRMDA     | 0 | 0.412063 | 0.165 | 0.001 | 0 Myeloid ce LRMDA         |
| 735 MTHFD2    | 0 | 0.411457 | 0.322 | 0.113 | 0 Myeloid ce MTHFD2        |
| 736 MCTP1     | 0 | 0.411188 | 0.16  | 0.006 | 0 Myeloid ce MCTP1         |
| 737 TMSB4X    | 0 | 0.410868 | 1     | 0.998 | 0 Myeloid ce TMSB4X        |
| 738 ITPK1     | 0 | 0.409425 | 0.241 | 0.052 | 0 Myeloid ce ITPK1         |
| 739 TOLLIP    | 0 | 0.407909 | 0.301 | 0.101 | 0 Myeloid ce TOLLIP        |
| 740 CX3CR1    | 0 | 0.407844 | 0.265 | 0.077 | 0 Myeloid ce CX3CR1        |
| 741 BAZ2B     | 0 | 0.407473 | 0.183 | 0.037 | 0 Myeloid ce BAZ2B         |
| 742 LIMS1     | 0 | 0.406864 | 0.334 | 0.118 | 0 Myeloid ce LIMS1         |
| 743 VAMP3     | 0 | 0.406469 | 0.294 | 0.089 | 0 Myeloid ce VAMP3         |
| 744 PLEKHB2   | 0 | 0.406411 | 0.295 | 0.097 | 0 Myeloid ce PLEKHB2       |
| 745 ACTN4     | 0 | 0.406159 | 0.319 | 0.113 | 0 Myeloid ce ACTN4         |
| 746 FNDC3B    | 0 | 0.406074 | 0.178 | 0.035 | 0 Myeloid ce FNDC3B        |
| 747 FOSB      | 0 | 0.405702 | 0.111 | 0.002 | 0 Myeloid ce FOSB          |
| 748 SIRPB1    | 0 | 0.405696 | 0.148 | 0.002 | 0 Myeloid ce SIRPB1        |
| 749 MLKL      | 0 | 0.405243 | 0.172 | 0.026 | 0 Myeloid ce MLKL          |
| 750 SECTM1    | 0 | 0.404819 | 0.148 | 0.001 | 0 Myeloid ce SECTM1        |
| 751 DNAJC25-C | 0 | 0.404438 | 0.236 | 0.066 | 0 Myeloid ce DNAJC25-GNG10 |

|               |   |          |       |       |                         |
|---------------|---|----------|-------|-------|-------------------------|
| 752 IL3RA     | 0 | 0.403384 | 0.113 | 0.007 | 0 Myeloid ce IL3RA      |
| 753 ADAMTSL4  | 0 | 0.4017   | 0.149 | 0.001 | 0 Myeloid ce ADAMTSL4   |
| 754 SNAP29    | 0 | 0.401136 | 0.31  | 0.105 | 0 Myeloid ce SNAP29     |
| 755 TNNT1     | 0 | 0.399526 | 0.103 | 0     | 0 Myeloid ce TNNT1      |
| 756 ETV6      | 0 | 0.399168 | 0.192 | 0.041 | 0 Myeloid ce ETV6       |
| 757 AC020916. | 0 | 0.398456 | 0.131 | 0.006 | 0 Myeloid ce AC020916.1 |
| 758 ARHGEF40  | 0 | 0.398201 | 0.126 | 0.001 | 0 Myeloid ce ARHGEF40   |
| 759 SLC25A24  | 0 | 0.397487 | 0.24  | 0.055 | 0 Myeloid ce SLC25A24   |
| 760 CD58      | 0 | 0.397054 | 0.259 | 0.072 | 0 Myeloid ce CD58       |
| 761 MEFV      | 0 | 0.396214 | 0.135 | 0     | 0 Myeloid ce MEFV       |
| 762 TNNI2     | 0 | 0.394425 | 0.161 | 0.012 | 0 Myeloid ce TNNI2      |
| 763 DGAT2     | 0 | 0.394116 | 0.101 | 0.006 | 0 Myeloid ce DGAT2      |
| 764 NRROS     | 0 | 0.391835 | 0.282 | 0.09  | 0 Myeloid ce NRROS      |
| 765 IMPA2     | 0 | 0.391358 | 0.149 | 0.007 | 0 Myeloid ce IMPA2      |
| 766 ICAM1     | 0 | 0.390532 | 0.144 | 0.017 | 0 Myeloid ce ICAM1      |
| 767 CCNY      | 0 | 0.388572 | 0.171 | 0.029 | 0 Myeloid ce CCNY       |
| 768 LEPROT    | 0 | 0.388058 | 0.274 | 0.087 | 0 Myeloid ce LEPROT     |
| 769 SIGLEC7   | 0 | 0.3869   | 0.173 | 0.011 | 0 Myeloid ce SIGLEC7    |
| 770 OAZ2      | 0 | 0.386826 | 0.24  | 0.063 | 0 Myeloid ce OAZ2       |
| 771 RP2       | 0 | 0.386683 | 0.21  | 0.038 | 0 Myeloid ce RP2        |
| 772 GNA15     | 0 | 0.386559 | 0.155 | 0.004 | 0 Myeloid ce GNA15      |
| 773 ARF3      | 0 | 0.386269 | 0.259 | 0.082 | 0 Myeloid ce ARF3       |
| 774 ZDHHC20   | 0 | 0.386138 | 0.213 | 0.058 | 0 Myeloid ce ZDHHC20    |
| 775 PDLIM5    | 0 | 0.385436 | 0.249 | 0.072 | 0 Myeloid ce PDLIM5     |
| 776 CYFIP1    | 0 | 0.384353 | 0.153 | 0.005 | 0 Myeloid ce CYFIP1     |
| 777 EVI5      | 0 | 0.383743 | 0.186 | 0.024 | 0 Myeloid ce EVI5       |
| 778 FRAT2     | 0 | 0.382184 | 0.157 | 0.022 | 0 Myeloid ce FRAT2      |
| 779 UNC93B1   | 0 | 0.381876 | 0.211 | 0.049 | 0 Myeloid ce UNC93B1    |
| 780 HIPK3     | 0 | 0.378722 | 0.227 | 0.061 | 0 Myeloid ce HIPK3      |
| 781 GRK3      | 0 | 0.378415 | 0.171 | 0.021 | 0 Myeloid ce GRK3       |
| 782 AGO4      | 0 | 0.376131 | 0.147 | 0.015 | 0 Myeloid ce AGO4       |
| 783 RPS6KA4   | 0 | 0.375986 | 0.204 | 0.055 | 0 Myeloid ce RPS6KA4    |
| 784 TP53I3    | 0 | 0.374798 | 0.149 | 0.012 | 0 Myeloid ce TP53I3     |
| 785 ACOT9     | 0 | 0.374759 | 0.249 | 0.064 | 0 Myeloid ce ACOT9      |
| 786 ATP6V1A   | 0 | 0.374096 | 0.22  | 0.058 | 0 Myeloid ce ATP6V1A    |
| 787 S100Z     | 0 | 0.374076 | 0.152 | 0.002 | 0 Myeloid ce S100Z      |
| 788 TLE3      | 0 | 0.37342  | 0.159 | 0.031 | 0 Myeloid ce TLE3       |
| 789 KDM6B     | 0 | 0.372307 | 0.176 | 0.041 | 0 Myeloid ce KDM6B      |
| 790 NLRP3     | 0 | 0.369887 | 0.141 | 0.002 | 0 Myeloid ce NLRP3      |
| 791 YWHAG     | 0 | 0.367822 | 0.214 | 0.055 | 0 Myeloid ce YWHAG      |
| 792 ZDHHC7    | 0 | 0.36552  | 0.224 | 0.057 | 0 Myeloid ce ZDHHC7     |
| 793 GNB4      | 0 | 0.364647 | 0.204 | 0.033 | 0 Myeloid ce GNB4       |
| 794 INPPL1    | 0 | 0.364174 | 0.158 | 0.024 | 0 Myeloid ce INPPL1     |
| 795 VCL       | 0 | 0.364114 | 0.218 | 0.056 | 0 Myeloid ce VCL        |
| 796 TRAPPC5   | 0 | 0.363338 | 0.27  | 0.086 | 0 Myeloid ce TRAPPC5    |
| 797 TLR1      | 0 | 0.36284  | 0.198 | 0.052 | 0 Myeloid ce TLR1       |
| 798 LINC01506 | 0 | 0.362788 | 0.125 | 0.001 | 0 Myeloid ce LINC01506  |

|              |   |          |       |       |                       |
|--------------|---|----------|-------|-------|-----------------------|
| 799 BCL3     | 0 | 0.36263  | 0.184 | 0.045 | 0 Myeloid ce BCL3     |
| 800 AGFG1    | 0 | 0.362436 | 0.163 | 0.032 | 0 Myeloid ce AGFG1    |
| 801 CBL      | 0 | 0.360721 | 0.215 | 0.061 | 0 Myeloid ce CBL      |
| 802 CEBPG    | 0 | 0.359488 | 0.253 | 0.076 | 0 Myeloid ce CEBPG    |
| 803 ABHD2    | 0 | 0.358718 | 0.179 | 0.041 | 0 Myeloid ce ABHD2    |
| 804 TMSB10   | 0 | 0.35781  | 0.991 | 0.998 | 0 Myeloid ce TMSB10   |
| 805 HES4     | 0 | 0.3577   | 0.111 | 0.004 | 0 Myeloid ce HES4     |
| 806 REEP4    | 0 | 0.357561 | 0.225 | 0.057 | 0 Myeloid ce REEP4    |
| 807 MTMR3    | 0 | 0.35739  | 0.171 | 0.041 | 0 Myeloid ce MTMR3    |
| 808 PRKACA   | 0 | 0.35715  | 0.147 | 0.015 | 0 Myeloid ce PRKACA   |
| 809 KDM1B    | 0 | 0.356153 | 0.181 | 0.026 | 0 Myeloid ce KDM1B    |
| 810 CALHM2   | 0 | 0.35571  | 0.24  | 0.064 | 0 Myeloid ce CALHM2   |
| 811 ZBTB7B   | 0 | 0.355487 | 0.197 | 0.045 | 0 Myeloid ce ZBTB7B   |
| 812 CDK2AP1  | 0 | 0.355089 | 0.145 | 0.006 | 0 Myeloid ce CDK2AP1  |
| 813 OSBPL11  | 0 | 0.354661 | 0.157 | 0.016 | 0 Myeloid ce OSBPL11  |
| 814 ARID3A   | 0 | 0.353833 | 0.152 | 0.024 | 0 Myeloid ce ARID3A   |
| 815 TFEC     | 0 | 0.352456 | 0.122 | 0.003 | 0 Myeloid ce TFEC     |
| 816 ZDHHC1   | 0 | 0.351906 | 0.124 | 0.001 | 0 Myeloid ce ZDHHC1   |
| 817 FAM157C  | 0 | 0.351481 | 0.111 | 0.005 | 0 Myeloid ce FAM157C  |
| 818 ICAM4    | 0 | 0.350371 | 0.132 | 0.003 | 0 Myeloid ce ICAM4    |
| 819 ASAP1    | 0 | 0.348878 | 0.154 | 0.024 | 0 Myeloid ce ASAP1    |
| 820 DSC2     | 0 | 0.34809  | 0.103 | 0     | 0 Myeloid ce DSC2     |
| 821 GAB2     | 0 | 0.346523 | 0.129 | 0.006 | 0 Myeloid ce GAB2     |
| 822 TRIB1    | 0 | 0.345933 | 0.111 | 0.008 | 0 Myeloid ce TRIB1    |
| 823 IER5     | 0 | 0.345263 | 0.148 | 0.02  | 0 Myeloid ce IER5     |
| 824 WDFY3    | 0 | 0.345178 | 0.108 | 0     | 0 Myeloid ce WDFY3    |
| 825 PISD     | 0 | 0.344326 | 0.206 | 0.055 | 0 Myeloid ce PISD     |
| 826 DENND1A  | 0 | 0.343138 | 0.151 | 0.02  | 0 Myeloid ce DENND1A  |
| 827 CEBPA    | 0 | 0.341847 | 0.127 | 0     | 0 Myeloid ce CEBPA    |
| 828 NBEAL2   | 0 | 0.341738 | 0.149 | 0.026 | 0 Myeloid ce NBEAL2   |
| 829 SSFA2    | 0 | 0.341088 | 0.169 | 0.029 | 0 Myeloid ce SSFA2    |
| 830 TLR8     | 0 | 0.33978  | 0.119 | 0     | 0 Myeloid ce TLR8     |
| 831 TMEM127  | 0 | 0.339632 | 0.161 | 0.027 | 0 Myeloid ce TMEM127  |
| 832 SERTAD3  | 0 | 0.338996 | 0.227 | 0.059 | 0 Myeloid ce SERTAD3  |
| 833 DENND6B  | 0 | 0.338439 | 0.176 | 0.033 | 0 Myeloid ce DENND6B  |
| 834 ZFYVE16  | 0 | 0.338079 | 0.153 | 0.031 | 0 Myeloid ce ZFYVE16  |
| 835 APH1B    | 0 | 0.337948 | 0.199 | 0.044 | 0 Myeloid ce APH1B    |
| 836 FUCA2    | 0 | 0.337556 | 0.197 | 0.039 | 0 Myeloid ce FUCA2    |
| 837 ATP6V0A1 | 0 | 0.33559  | 0.138 | 0.023 | 0 Myeloid ce ATP6V0A1 |
| 838 B3GNT8   | 0 | 0.334509 | 0.122 | 0.003 | 0 Myeloid ce B3GNT8   |
| 839 METRNL   | 0 | 0.328997 | 0.132 | 0.011 | 0 Myeloid ce METRNL   |
| 840 TNFRSF8  | 0 | 0.328159 | 0.124 | 0.001 | 0 Myeloid ce TNFRSF8  |
| 841 LACTB    | 0 | 0.325234 | 0.161 | 0.033 | 0 Myeloid ce LACTB    |
| 842 FGD2     | 0 | 0.323343 | 0.244 | 0.07  | 0 Myeloid ce FGD2     |
| 843 DENND5A  | 0 | 0.322637 | 0.152 | 0.023 | 0 Myeloid ce DENND5A  |
| 844 ACER3    | 0 | 0.321106 | 0.148 | 0.018 | 0 Myeloid ce ACER3    |
| 845 GLA      | 0 | 0.321047 | 0.172 | 0.034 | 0 Myeloid ce GLA      |

|               |   |          |       |       |                        |
|---------------|---|----------|-------|-------|------------------------|
| 846 SLC46A2   | 0 | 0.319377 | 0.119 | 0     | 0 Myeloid ce SLC46A2   |
| 847 ARL11     | 0 | 0.318756 | 0.189 | 0.036 | 0 Myeloid ce ARL11     |
| 848 TCN2      | 0 | 0.317765 | 0.124 | 0.001 | 0 Myeloid ce TCN2      |
| 849 ATP11A    | 0 | 0.316534 | 0.131 | 0.017 | 0 Myeloid ce ATP11A    |
| 850 SMARCD3   | 0 | 0.314721 | 0.106 | 0.007 | 0 Myeloid ce SMARCD3   |
| 851 TBC1D2    | 0 | 0.312436 | 0.144 | 0.015 | 0 Myeloid ce TBC1D2    |
| 852 GAS6      | 0 | 0.311514 | 0.112 | 0.012 | 0 Myeloid ce GAS6      |
| 853 TK2       | 0 | 0.31054  | 0.131 | 0.012 | 0 Myeloid ce TK2       |
| 854 AP5B1     | 0 | 0.309841 | 0.112 | 0.009 | 0 Myeloid ce AP5B1     |
| 855 TRIOBP    | 0 | 0.309287 | 0.138 | 0.023 | 0 Myeloid ce TRIOBP    |
| 856 ADGRE1    | 0 | 0.308128 | 0.123 | 0.005 | 0 Myeloid ce ADGRE1    |
| 857 SPECC1    | 0 | 0.307281 | 0.127 | 0.01  | 0 Myeloid ce SPECC1    |
| 858 TLR5      | 0 | 0.306499 | 0.107 | 0.007 | 0 Myeloid ce TLR5      |
| 859 RRAS      | 0 | 0.304357 | 0.126 | 0.009 | 0 Myeloid ce RRAS      |
| 860 IL13RA1   | 0 | 0.304313 | 0.115 | 0.006 | 0 Myeloid ce IL13RA1   |
| 861 LINC00877 | 0 | 0.304095 | 0.125 | 0.004 | 0 Myeloid ce LINC00877 |
| 862 ZMIZ1     | 0 | 0.303169 | 0.146 | 0.022 | 0 Myeloid ce ZMIZ1     |
| 863 NPEPL1    | 0 | 0.302806 | 0.144 | 0.021 | 0 Myeloid ce NPEPL1    |
| 864 FGD4      | 0 | 0.300176 | 0.116 | 0.003 | 0 Myeloid ce FGD4      |
| 865 STX3      | 0 | 0.300155 | 0.106 | 0.012 | 0 Myeloid ce STX3      |
| 866 NHSL2     | 0 | 0.299372 | 0.111 | 0.006 | 0 Myeloid ce NHSL2     |
| 867 TST       | 0 | 0.299035 | 0.128 | 0.016 | 0 Myeloid ce TST       |
| 868 HPSE      | 0 | 0.29834  | 0.112 | 0.008 | 0 Myeloid ce HPSE      |
| 869 PTPN12    | 0 | 0.297865 | 0.158 | 0.033 | 0 Myeloid ce PTPN12    |
| 870 FAM129B   | 0 | 0.296858 | 0.101 | 0.001 | 0 Myeloid ce FAM129B   |
| 871 MAP3K20   | 0 | 0.295779 | 0.127 | 0.011 | 0 Myeloid ce MAP3K20   |
| 872 SLCO3A1   | 0 | 0.29548  | 0.116 | 0.017 | 0 Myeloid ce SLCO3A1   |
| 873 PLAGL2    | 0 | 0.294131 | 0.135 | 0.018 | 0 Myeloid ce PLAGL2    |
| 874 IL18      | 0 | 0.293972 | 0.119 | 0.005 | 0 Myeloid ce IL18      |
| 875 SMIM3     | 0 | 0.293765 | 0.155 | 0.025 | 0 Myeloid ce SMIM3     |
| 876 AGPAT3    | 0 | 0.292352 | 0.138 | 0.019 | 0 Myeloid ce AGPAT3    |
| 877 RHOQ      | 0 | 0.291517 | 0.128 | 0.021 | 0 Myeloid ce RHOQ      |
| 878 NEK6      | 0 | 0.290104 | 0.15  | 0.021 | 0 Myeloid ce NEK6      |
| 879 IQSEC2    | 0 | 0.289223 | 0.111 | 0.001 | 0 Myeloid ce IQSEC2    |
| 880 KIF1B     | 0 | 0.289006 | 0.105 | 0.013 | 0 Myeloid ce KIF1B     |
| 881 ST14      | 0 | 0.287296 | 0.113 | 0.006 | 0 Myeloid ce ST14      |
| 882 CTBP2     | 0 | 0.287249 | 0.142 | 0.019 | 0 Myeloid ce CTBP2     |
| 883 TMEM170B  | 0 | 0.286824 | 0.101 | 0.001 | 0 Myeloid ce TMEM170B  |
| 884 SLC27A3   | 0 | 0.282838 | 0.157 | 0.032 | 0 Myeloid ce SLC27A3   |
| 885 MAFG      | 0 | 0.280597 | 0.104 | 0.007 | 0 Myeloid ce MAFG      |
| 886 ULK1      | 0 | 0.275581 | 0.106 | 0.014 | 0 Myeloid ce ULK1      |
| 887 VPS9D1    | 0 | 0.273855 | 0.101 | 0.011 | 0 Myeloid ce VPS9D1    |
| 888 IL10RB-DT | 0 | 0.27231  | 0.103 | 0.004 | 0 Myeloid ce IL10RB-DT |
| 889 TRIQK     | 0 | 0.270001 | 0.118 | 0.008 | 0 Myeloid ce TRIQK     |
| 890 HIP1      | 0 | 0.266735 | 0.101 | 0.013 | 0 Myeloid ce HIP1      |
| 891 SLC43A3   | 0 | 0.263415 | 0.152 | 0.03  | 0 Myeloid ce SLC43A3   |
| 892 BEST1     | 0 | 0.261083 | 0.111 | 0.008 | 0 Myeloid ce BEST1     |

|     |          |   |          |       |       |   |                     |
|-----|----------|---|----------|-------|-------|---|---------------------|
| 893 | SAMD4A   | 0 | 0.259198 | 0.102 | 0.003 | 0 | Myeloid ce SAMD4A   |
| 894 | ALPK1    | 0 | 0.254357 | 0.1   | 0.014 | 0 | Myeloid ce ALPK1    |
| 895 | SRGAP2   | 0 | 0.253272 | 0.116 | 0.014 | 0 | Myeloid ce SRGAP2   |
| 896 | IGFBP7   | 0 | 0.253196 | 0.21  | 0.038 | 0 | Myeloid ce IGFBP7   |
| 897 | RPS24    | 0 | -0.43139 | 0.968 | 0.998 | 0 | Myeloid ce RPS24    |
| 898 | NACA     | 0 | -0.45326 | 0.966 | 0.994 | 0 | Myeloid ce NACA     |
| 899 | MT-ATP6  | 0 | -0.48474 | 0.977 | 0.995 | 0 | Myeloid ce MT-ATP6  |
| 900 | BTF3     | 0 | -0.51583 | 0.896 | 0.962 | 0 | Myeloid ce BTF3     |
| 901 | RPL28    | 0 | -0.52508 | 0.993 | 0.998 | 0 | Myeloid ce RPL28    |
| 902 | TPT1     | 0 | -0.55941 | 0.994 | 0.994 | 0 | Myeloid ce TPT1     |
| 903 | FAU      | 0 | -0.57155 | 0.994 | 0.998 | 0 | Myeloid ce FAU      |
| 904 | PTMA     | 0 | -0.58562 | 0.922 | 0.997 | 0 | Myeloid ce PTMA     |
| 905 | MT-CYB   | 0 | -0.58934 | 0.913 | 0.956 | 0 | Myeloid ce MT-CYB   |
| 906 | PABPC1   | 0 | -0.59039 | 0.921 | 0.945 | 0 | Myeloid ce PABPC1   |
| 907 | RPLP2    | 0 | -0.59974 | 0.923 | 0.975 | 0 | Myeloid ce RPLP2    |
| 908 | LIMD2    | 0 | -0.602   | 0.867 | 0.936 | 0 | Myeloid ce LIMD2    |
| 909 | RPL35    | 0 | -0.63434 | 0.916 | 0.991 | 0 | Myeloid ce RPL35    |
| 910 | DDX5     | 0 | -0.65675 | 0.777 | 0.856 | 0 | Myeloid ce DDX5     |
| 911 | PCBP2    | 0 | -0.67006 | 0.874 | 0.944 | 0 | Myeloid ce PCBP2    |
| 912 | RPL15    | 0 | -0.68357 | 0.919 | 0.989 | 0 | Myeloid ce RPL15    |
| 913 | RPS19    | 0 | -0.68578 | 0.957 | 0.998 | 0 | Myeloid ce RPS19    |
| 914 | RPL8     | 0 | -0.69512 | 0.951 | 0.997 | 0 | Myeloid ce RPL8     |
| 915 | SRSF5    | 0 | -0.722   | 0.652 | 0.768 | 0 | Myeloid ce SRSF5    |
| 916 | RPS13    | 0 | -0.72297 | 0.96  | 0.998 | 0 | Myeloid ce RPS13    |
| 917 | MALAT1   | 0 | -0.72606 | 0.996 | 0.996 | 0 | Myeloid ce MALAT1   |
| 918 | RPS15    | 0 | -0.73102 | 0.958 | 0.999 | 0 | Myeloid ce RPS15    |
| 919 | RPS14    | 0 | -0.74553 | 0.96  | 0.995 | 0 | Myeloid ce RPS14    |
| 920 | RPS16    | 0 | -0.74953 | 0.857 | 0.934 | 0 | Myeloid ce RPS16    |
| 921 | RPL26    | 0 | -0.75356 | 0.937 | 0.995 | 0 | Myeloid ce RPL26    |
| 922 | CIRBP    | 0 | -0.76721 | 0.643 | 0.781 | 0 | Myeloid ce CIRBP    |
| 923 | SNRPD2   | 0 | -0.80416 | 0.724 | 0.858 | 0 | Myeloid ce SNRPD2   |
| 924 | EIF3E    | 0 | -0.80595 | 0.549 | 0.696 | 0 | Myeloid ce EIF3E    |
| 925 | RAC2     | 0 | -0.81099 | 0.84  | 0.915 | 0 | Myeloid ce RAC2     |
| 926 | RPL4     | 0 | -0.81247 | 0.82  | 0.917 | 0 | Myeloid ce RPL4     |
| 927 | RPL24    | 0 | -0.81262 | 0.932 | 0.992 | 0 | Myeloid ce RPL24    |
| 928 | CNN2     | 0 | -0.81652 | 0.543 | 0.699 | 0 | Myeloid ce CNN2     |
| 929 | EEF1D    | 0 | -0.83016 | 0.949 | 0.989 | 0 | Myeloid ce EEF1D    |
| 930 | MAT2B    | 0 | -0.83182 | 0.364 | 0.572 | 0 | Myeloid ce MAT2B    |
| 931 | RPL41    | 0 | -0.83971 | 0.995 | 1     | 0 | Myeloid ce RPL41    |
| 932 | RPL37    | 0 | -0.84722 | 0.957 | 0.982 | 0 | Myeloid ce RPL37    |
| 933 | HSP90AB1 | 0 | -0.8545  | 0.665 | 0.864 | 0 | Myeloid ce HSP90AB1 |
| 934 | RPS7     | 0 | -0.85494 | 0.96  | 0.998 | 0 | Myeloid ce RPS7     |
| 935 | RPL22    | 0 | -0.85612 | 0.914 | 0.985 | 0 | Myeloid ce RPL22    |
| 936 | HINT1    | 0 | -0.86368 | 0.803 | 0.929 | 0 | Myeloid ce HINT1    |
| 937 | SLC38A1  | 0 | -0.87912 | 0.062 | 0.324 | 0 | Myeloid ce SLC38A1  |
| 938 | MIF      | 0 | -0.88211 | 0.692 | 0.851 | 0 | Myeloid ce MIF      |
| 939 | RPL9     | 0 | -0.88747 | 0.938 | 0.99  | 0 | Myeloid ce RPL9     |



|              |   |          |       |       |                       |
|--------------|---|----------|-------|-------|-----------------------|
| 940 RPL12    | 0 | -0.89117 | 0.951 | 0.997 | 0 Myeloid ce RPL12    |
| 941 HNRNPDL  | 0 | -0.9042  | 0.653 | 0.846 | 0 Myeloid ce HNRNPDL  |
| 942 NCL      | 0 | -0.90923 | 0.543 | 0.752 | 0 Myeloid ce NCL      |
| 943 TNFAIP8  | 0 | -0.90925 | 0.28  | 0.52  | 0 Myeloid ce TNFAIP8  |
| 944 RPS28    | 0 | -0.91505 | 0.966 | 0.998 | 0 Myeloid ce RPS28    |
| 945 RPL39    | 0 | -0.91555 | 0.988 | 0.998 | 0 Myeloid ce RPL39    |
| 946 RPL6     | 0 | -0.92194 | 0.944 | 0.997 | 0 Myeloid ce RPL6     |
| 947 SNRPN    | 0 | -0.93149 | 0.102 | 0.376 | 0 Myeloid ce SNRPN    |
| 948 ABLIM1   | 0 | -0.93865 | 0.036 | 0.304 | 0 Myeloid ce ABLIM1   |
| 949 HNRNPA1  | 0 | -0.94276 | 0.805 | 0.94  | 0 Myeloid ce HNRNPA1  |
| 950 RPL21    | 0 | -0.95705 | 0.903 | 0.977 | 0 Myeloid ce RPL21    |
| 951 RPL7A    | 0 | -0.96202 | 0.948 | 0.997 | 0 Myeloid ce RPL7A    |
| 952 NOP53    | 0 | -0.96465 | 0.457 | 0.669 | 0 Myeloid ce NOP53    |
| 953 RPL19    | 0 | -0.96756 | 0.967 | 0.998 | 0 Myeloid ce RPL19    |
| 954 PIK3IP1  | 0 | -0.97794 | 0.068 | 0.333 | 0 Myeloid ce PIK3IP1  |
| 955 RPL11    | 0 | -0.98939 | 0.969 | 0.998 | 0 Myeloid ce RPL11    |
| 956 RACK1    | 0 | -0.99232 | 0.937 | 0.992 | 0 Myeloid ce RACK1    |
| 957 LIME1    | 0 | -0.99566 | 0.052 | 0.343 | 0 Myeloid ce LIME1    |
| 958 PEBP1    | 0 | -0.99774 | 0.267 | 0.554 | 0 Myeloid ce PEBP1    |
| 959 RPL35A   | 0 | -1.00289 | 0.941 | 0.995 | 0 Myeloid ce RPL35A   |
| 960 IL16     | 0 | -1.00317 | 0.299 | 0.561 | 0 Myeloid ce IL16     |
| 961 PIM2     | 0 | -1.01273 | 0.063 | 0.337 | 0 Myeloid ce PIM2     |
| 962 CLEC2D   | 0 | -1.02133 | 0.058 | 0.354 | 0 Myeloid ce CLEC2D   |
| 963 LDLRAP1  | 0 | -1.02929 | 0.062 | 0.331 | 0 Myeloid ce LDLRAP1  |
| 964 MAL      | 0 | -1.03179 | 0.04  | 0.297 | 0 Myeloid ce MAL      |
| 965 RPL18    | 0 | -1.03372 | 0.943 | 0.997 | 0 Myeloid ce RPL18    |
| 966 RPS29    | 0 | -1.0362  | 0.707 | 0.846 | 0 Myeloid ce RPS29    |
| 967 RPL23A   | 0 | -1.03665 | 0.869 | 0.975 | 0 Myeloid ce RPL23A   |
| 968 PCED1B   | 0 | -1.04749 | 0.047 | 0.326 | 0 Myeloid ce PCED1B   |
| 969 RPL29    | 0 | -1.04862 | 0.955 | 0.998 | 0 Myeloid ce RPL29    |
| 970 Sep-06   | 0 | -1.05604 | 0.298 | 0.581 | 0 Myeloid ce Sep-06   |
| 971 FLT3LG   | 0 | -1.05647 | 0.171 | 0.417 | 0 Myeloid ce FLT3LG   |
| 972 RPL36    | 0 | -1.05772 | 0.934 | 0.996 | 0 Myeloid ce RPL36    |
| 973 TRAF3IP3 | 0 | -1.06158 | 0.455 | 0.686 | 0 Myeloid ce TRAF3IP3 |
| 974 TRAC     | 0 | -1.06405 | 0.036 | 0.312 | 0 Myeloid ce TRAC     |
| 975 ETS1     | 0 | -1.06912 | 0.068 | 0.382 | 0 Myeloid ce ETS1     |
| 976 IFITM1   | 0 | -1.08719 | 0.502 | 0.84  | 0 Myeloid ce IFITM1   |
| 977 RPS8     | 0 | -1.10287 | 0.948 | 0.997 | 0 Myeloid ce RPS8     |
| 978 ANXA6    | 0 | -1.1195  | 0.309 | 0.616 | 0 Myeloid ce ANXA6    |
| 979 HIST1H4C | 0 | -1.12032 | 0.426 | 0.665 | 0 Myeloid ce HIST1H4C |
| 980 SPOCK2   | 0 | -1.1225  | 0.043 | 0.363 | 0 Myeloid ce SPOCK2   |
| 981 RPL18A   | 0 | -1.14129 | 0.943 | 0.998 | 0 Myeloid ce RPL18A   |
| 982 TSTD1    | 0 | -1.14391 | 0.224 | 0.56  | 0 Myeloid ce TSTD1    |
| 983 CAMK4    | 0 | -1.1478  | 0.038 | 0.345 | 0 Myeloid ce CAMK4    |
| 984 RPS6     | 0 | -1.15457 | 0.934 | 0.995 | 0 Myeloid ce RPS6     |
| 985 RPL34    | 0 | -1.1548  | 0.974 | 0.997 | 0 Myeloid ce RPL34    |
| 986 RPS23    | 0 | -1.15998 | 0.956 | 0.997 | 0 Myeloid ce RPS23    |

|      |           |   |          |       |       |   |                       |
|------|-----------|---|----------|-------|-------|---|-----------------------|
| 987  | EEF2      | 0 | -1.16225 | 0.814 | 0.95  | 0 | Myeloid ce EEF2       |
| 988  | HMGN1     | 0 | -1.16483 | 0.413 | 0.755 | 0 | Myeloid ce HMGN1      |
| 989  | CD2       | 0 | -1.16557 | 0.047 | 0.354 | 0 | Myeloid ce CD2        |
| 990  | STK17A    | 0 | -1.17339 | 0.114 | 0.452 | 0 | Myeloid ce STK17A     |
| 991  | AC243960. | 0 | -1.17942 | 0.055 | 0.404 | 0 | Myeloid ce AC243960.1 |
| 992  | RPLP0     | 0 | -1.1877  | 0.913 | 0.995 | 0 | Myeloid ce RPLP0      |
| 993  | RPS25     | 0 | -1.19047 | 0.952 | 0.996 | 0 | Myeloid ce RPS25      |
| 994  | RPL14     | 0 | -1.20336 | 0.936 | 0.996 | 0 | Myeloid ce RPL14      |
| 995  | RPL10A    | 0 | -1.20406 | 0.83  | 0.969 | 0 | Myeloid ce RPL10A     |
| 996  | SKAP1     | 0 | -1.2075  | 0.042 | 0.403 | 0 | Myeloid ce SKAP1      |
| 997  | EEF1A1    | 0 | -1.20811 | 0.982 | 0.999 | 0 | Myeloid ce EEF1A1     |
| 998  | RPL32     | 0 | -1.20949 | 0.966 | 0.998 | 0 | Myeloid ce RPL32      |
| 999  | RPL13     | 0 | -1.22265 | 0.944 | 0.998 | 0 | Myeloid ce RPL13      |
| 1000 | DENND2D   | 0 | -1.2232  | 0.131 | 0.444 | 0 | Myeloid ce DENND2D    |
| 1001 | S1PR1     | 0 | -1.23401 | 0.044 | 0.417 | 0 | Myeloid ce S1PR1      |
| 1002 | RPS3A     | 0 | -1.23662 | 0.944 | 0.997 | 0 | Myeloid ce RPS3A      |
| 1003 | TBC1D10C  | 0 | -1.24132 | 0.366 | 0.699 | 0 | Myeloid ce TBC1D10C   |
| 1004 | RPL30     | 0 | -1.24874 | 0.989 | 0.998 | 0 | Myeloid ce RPL30      |
| 1005 | RPS27A    | 0 | -1.25475 | 0.966 | 0.998 | 0 | Myeloid ce RPS27A     |
| 1006 | RPS21     | 0 | -1.27257 | 0.933 | 0.994 | 0 | Myeloid ce RPS21      |
| 1007 | RPS3      | 0 | -1.2828  | 0.959 | 0.998 | 0 | Myeloid ce RPS3       |
| 1008 | BIN1      | 0 | -1.28353 | 0.124 | 0.515 | 0 | Myeloid ce BIN1       |
| 1009 | RPL10     | 0 | -1.29117 | 0.968 | 0.998 | 0 | Myeloid ce RPL10      |
| 1010 | OCIAD2    | 0 | -1.29143 | 0.065 | 0.474 | 0 | Myeloid ce OCIAD2     |
| 1011 | ITM2A     | 0 | -1.31512 | 0.049 | 0.392 | 0 | Myeloid ce ITM2A      |
| 1012 | RPS15A    | 0 | -1.31638 | 0.978 | 0.999 | 0 | Myeloid ce RPS15A     |
| 1013 | RPS12     | 0 | -1.32158 | 0.962 | 0.999 | 0 | Myeloid ce RPS12      |
| 1014 | HSPA8     | 0 | -1.32802 | 0.648 | 0.893 | 0 | Myeloid ce HSPA8      |
| 1015 | RPSA      | 0 | -1.32911 | 0.8   | 0.957 | 0 | Myeloid ce RPSA       |
| 1016 | ZAP70     | 0 | -1.34517 | 0.042 | 0.416 | 0 | Myeloid ce ZAP70      |
| 1017 | RPS18     | 0 | -1.35119 | 0.94  | 0.998 | 0 | Myeloid ce RPS18      |
| 1018 | ISG20     | 0 | -1.37161 | 0.207 | 0.607 | 0 | Myeloid ce ISG20      |
| 1019 | MYC       | 0 | -1.38369 | 0.127 | 0.439 | 0 | Myeloid ce MYC        |
| 1020 | SARAF     | 0 | -1.39224 | 0.72  | 0.908 | 0 | Myeloid ce SARAF      |
| 1021 | BTG1      | 0 | -1.40494 | 0.718 | 0.902 | 0 | Myeloid ce BTG1       |
| 1022 | Sep-01    | 0 | -1.43113 | 0.181 | 0.628 | 0 | Myeloid ce Sep-01     |
| 1023 | RHOH      | 0 | -1.4372  | 0.064 | 0.509 | 0 | Myeloid ce RHOH       |
| 1024 | RPS4X     | 0 | -1.44195 | 0.933 | 0.997 | 0 | Myeloid ce RPS4X      |
| 1025 | EEF1B2    | 0 | -1.44965 | 0.856 | 0.982 | 0 | Myeloid ce EEF1B2     |
| 1026 | LAT       | 0 | -1.45955 | 0.08  | 0.468 | 0 | Myeloid ce LAT        |
| 1027 | MT-ND4L   | 0 | -1.463   | 0.809 | 0.971 | 0 | Myeloid ce MT-ND4L    |
| 1028 | RPL5      | 0 | -1.46724 | 0.905 | 0.994 | 0 | Myeloid ce RPL5       |
| 1029 | GYPC      | 0 | -1.48391 | 0.329 | 0.716 | 0 | Myeloid ce GYPC       |
| 1030 | NOSIP     | 0 | -1.5175  | 0.433 | 0.659 | 0 | Myeloid ce NOSIP      |
| 1031 | CD3G      | 0 | -1.51982 | 0.05  | 0.455 | 0 | Myeloid ce CD3G       |
| 1032 | CD27      | 0 | -1.53031 | 0.054 | 0.466 | 0 | Myeloid ce CD27       |
| 1033 | RPL3      | 0 | -1.53265 | 0.908 | 0.996 | 0 | Myeloid ce RPL3       |

|      |           |           |          |       |       |           |                      |
|------|-----------|-----------|----------|-------|-------|-----------|----------------------|
| 1034 | TRBC1     | 0         | -1.53838 | 0.044 | 0.337 | 0         | Myeloid ce TRBC1     |
| 1035 | PTPRCAP   | 0         | -1.55054 | 0.064 | 0.531 | 0         | Myeloid ce PTPRCAP   |
| 1036 | CD247     | 0         | -1.55564 | 0.044 | 0.427 | 0         | Myeloid ce CD247     |
| 1037 | LBH       | 0         | -1.57909 | 0.067 | 0.541 | 0         | Myeloid ce LBH       |
| 1038 | GZMM      | 0         | -1.61496 | 0.051 | 0.453 | 0         | Myeloid ce GZMM      |
| 1039 | RPS27     | 0         | -1.65447 | 0.962 | 0.998 | 0         | Myeloid ce RPS27     |
| 1040 | C12orf57  | 0         | -1.6673  | 0.399 | 0.802 | 0         | Myeloid ce C12orf57  |
| 1041 | NPM1      | 0         | -1.68475 | 0.657 | 0.942 | 0         | Myeloid ce NPM1      |
| 1042 | RPS5      | 0         | -1.68891 | 0.895 | 0.995 | 0         | Myeloid ce RPS5      |
| 1043 | AES       | 0         | -1.70168 | 0.337 | 0.781 | 0         | Myeloid ce AES       |
| 1044 | LINC00861 | 0         | -1.74936 | 0.059 | 0.498 | 0         | Myeloid ce LINC00861 |
| 1045 | LEF1      | 0         | -1.77802 | 0.062 | 0.477 | 0         | Myeloid ce LEF1      |
| 1046 | TCF7      | 0         | -1.79281 | 0.061 | 0.459 | 0         | Myeloid ce TCF7      |
| 1047 | EVL       | 0         | -1.89646 | 0.293 | 0.795 | 0         | Myeloid ce EVL       |
| 1048 | FCMR      | 0         | -1.96464 | 0.075 | 0.639 | 0         | Myeloid ce FCMR      |
| 1049 | LCK       | 0         | -2.04616 | 0.07  | 0.619 | 0         | Myeloid ce LCK       |
| 1050 | LDHB      | 0         | -2.11456 | 0.386 | 0.787 | 0         | Myeloid ce LDHB      |
| 1051 | CCR7      | 0         | -2.1598  | 0.076 | 0.597 | 0         | Myeloid ce CCR7      |
| 1052 | CD3D      | 0         | -2.18271 | 0.076 | 0.593 | 0         | Myeloid ce CD3D      |
| 1053 | CD79A     | 0         | -2.2168  | 0.063 | 0.339 | 0         | Myeloid ce CD79A     |
| 1054 | TRBC2     | 0         | -2.22186 | 0.103 | 0.749 | 0         | Myeloid ce TRBC2     |
| 1055 | IL7R      | 0         | -2.27774 | 0.072 | 0.517 | 0         | Myeloid ce IL7R      |
| 1056 | MS4A1     | 0         | -2.3731  | 0.051 | 0.3   | 0         | Myeloid ce MS4A1     |
| 1057 | LTB       | 0         | -2.40404 | 0.423 | 0.857 | 0         | Myeloid ce LTB       |
| 1058 | CD7       | 0         | -2.49049 | 0.091 | 0.636 | 0         | Myeloid ce CD7       |
| 1059 | CD3E      | 0         | -2.74522 | 0.087 | 0.662 | 0         | Myeloid ce CD3E      |
| 1060 | IL32      | 0         | -2.85201 | 0.089 | 0.628 | 0         | Myeloid ce IL32      |
| 1061 | SNN       | 8.51E-308 | 0.290522 | 0.196 | 0.051 | 1.60E-303 | Myeloid ce SNN       |
| 1062 | CMIP      | 5.86E-307 | 0.317918 | 0.167 | 0.039 | 1.10E-302 | Myeloid ce CMIP      |
| 1063 | TBC1D10B  | 1.10E-306 | 0.269735 | 0.112 | 0.018 | 2.06E-302 | Myeloid ce TBC1D10B  |
| 1064 | ITM2B     | 1.73E-305 | 0.645167 | 0.953 | 0.877 | 3.25E-301 | Myeloid ce ITM2B     |
| 1065 | SAMSN1    | 3.39E-305 | 0.415706 | 0.228 | 0.069 | 6.36E-301 | Myeloid ce SAMSN1    |
| 1066 | CPQ       | 2.05E-303 | 0.268897 | 0.159 | 0.036 | 3.85E-299 | Myeloid ce CPQ       |
| 1067 | HLA-DRB5  | 1.12E-302 | 0.273399 | 0.698 | 0.355 | 2.11E-298 | Myeloid ce HLA-DRB5  |
| 1068 | CD69      | 1.38E-302 | -0.95847 | 0.031 | 0.269 | 2.60E-298 | Myeloid ce CD69      |
| 1069 | PRKCH     | 3.13E-302 | -0.87801 | 0.038 | 0.276 | 5.88E-298 | Myeloid ce PRKCH     |
| 1070 | POLE4     | 6.55E-302 | 0.505691 | 0.504 | 0.24  | 1.23E-297 | Myeloid ce POLE4     |
| 1071 | DNAJC13   | 1.02E-301 | 0.299801 | 0.145 | 0.031 | 1.92E-297 | Myeloid ce DNAJC13   |
| 1072 | SORL1     | 1.95E-301 | 0.716742 | 0.389 | 0.167 | 3.66E-297 | Myeloid ce SORL1     |
| 1073 | HLA-E     | 2.38E-301 | -0.45566 | 0.926 | 0.96  | 4.48E-297 | Myeloid ce HLA-E     |
| 1074 | SEC61B    | 2.76E-301 | 0.56645  | 0.804 | 0.552 | 5.18E-297 | Myeloid ce SEC61B    |
| 1075 | CD5       | 3.41E-301 | -0.84097 | 0.026 | 0.26  | 6.41E-297 | Myeloid ce CD5       |
| 1076 | SIT1      | 3.47E-301 | -0.86835 | 0.041 | 0.28  | 6.52E-297 | Myeloid ce SIT1      |
| 1077 | EIF4A2    | 2.60E-300 | -0.83169 | 0.355 | 0.556 | 4.88E-296 | Myeloid ce EIF4A2    |
| 1078 | DIAPH2    | 8.68E-300 | 0.274433 | 0.143 | 0.03  | 1.63E-295 | Myeloid ce DIAPH2    |
| 1079 | ATP1B3    | 1.09E-299 | 0.422872 | 0.343 | 0.133 | 2.04E-295 | Myeloid ce ATP1B3    |
| 1080 | PCBD1     | 1.61E-299 | 0.32072  | 0.236 | 0.073 | 3.03E-295 | Myeloid ce PCBD1     |

|      |          |           |          |       |       |           |                     |
|------|----------|-----------|----------|-------|-------|-----------|---------------------|
| 1081 | TPM4     | 3.02E-299 | 0.49742  | 0.468 | 0.216 | 5.68E-295 | Myeloid ce TPM4     |
| 1082 | COQ2     | 4.76E-299 | 0.263134 | 0.16  | 0.037 | 8.95E-295 | Myeloid ce COQ2     |
| 1083 | ABR      | 4.99E-299 | 0.294753 | 0.155 | 0.035 | 9.38E-295 | Myeloid ce ABR      |
| 1084 | TRAT1    | 6.28E-298 | -0.93766 | 0.028 | 0.26  | 1.18E-293 | Myeloid ce TRAT1    |
| 1085 | CPEB4    | 3.70E-297 | 0.290011 | 0.124 | 0.023 | 6.95E-293 | Myeloid ce CPEB4    |
| 1086 | PAK2     | 7.26E-297 | 0.543783 | 0.618 | 0.336 | 1.36E-292 | Myeloid ce PAK2     |
| 1087 | OSBPL8   | 9.68E-297 | 0.503134 | 0.464 | 0.212 | 1.82E-292 | Myeloid ce OSBPL8   |
| 1088 | GIMAP7   | 1.52E-296 | -1.10234 | 0.557 | 0.634 | 2.85E-292 | Myeloid ce GIMAP7   |
| 1089 | SFT2D1   | 3.00E-296 | 0.430856 | 0.473 | 0.215 | 5.63E-292 | Myeloid ce SFT2D1   |
| 1090 | ATP6V1F  | 3.52E-296 | 0.583362 | 0.719 | 0.463 | 6.62E-292 | Myeloid ce ATP6V1F  |
| 1091 | GM2A     | 3.59E-296 | 0.416301 | 0.221 | 0.067 | 6.75E-292 | Myeloid ce GM2A     |
| 1092 | IFI6     | 4.23E-294 | 0.563766 | 0.332 | 0.132 | 7.95E-290 | Myeloid ce IFI6     |
| 1093 | EIF1     | 1.02E-293 | 0.436866 | 0.985 | 0.976 | 1.91E-289 | Myeloid ce EIF1     |
| 1094 | AQP3     | 3.03E-293 | -0.99982 | 0.03  | 0.26  | 5.68E-289 | Myeloid ce AQP3     |
| 1095 | CMTM7    | 3.78E-293 | 0.44938  | 0.458 | 0.208 | 7.10E-289 | Myeloid ce CMTM7    |
| 1096 | RNF13    | 4.07E-293 | 0.466906 | 0.431 | 0.191 | 7.64E-289 | Myeloid ce RNF13    |
| 1097 | USP32    | 8.93E-293 | 0.298551 | 0.152 | 0.034 | 1.68E-288 | Myeloid ce USP32    |
| 1098 | RPL31    | 2.35E-292 | -0.53854 | 0.828 | 0.883 | 4.41E-288 | Myeloid ce RPL31    |
| 1099 | MT-ND1   | 4.48E-292 | 0.669472 | 0.949 | 0.849 | 8.42E-288 | Myeloid ce MT-ND1   |
| 1100 | DOCK8    | 3.99E-290 | 0.53349  | 0.564 | 0.293 | 7.49E-286 | Myeloid ce DOCK8    |
| 1101 | STRN4    | 7.54E-290 | 0.267023 | 0.14  | 0.03  | 1.42E-285 | Myeloid ce STRN4    |
| 1102 | CTSW     | 7.14E-289 | -1.87017 | 0.048 | 0.279 | 1.34E-284 | Myeloid ce CTSW     |
| 1103 | YWHAH    | 7.24E-289 | 0.392447 | 0.321 | 0.122 | 1.36E-284 | Myeloid ce YWHAH    |
| 1104 | ENTPD1   | 4.82E-288 | 0.338048 | 0.151 | 0.035 | 9.05E-284 | Myeloid ce ENTPD1   |
| 1105 | MAPKAPK2 | 9.16E-288 | 0.316187 | 0.156 | 0.037 | 1.72E-283 | Myeloid ce MAPKAPK2 |
| 1106 | ANAPC11  | 3.01E-287 | 0.510328 | 0.682 | 0.398 | 5.65E-283 | Myeloid ce ANAPC11  |
| 1107 | FLOT1    | 9.28E-287 | 0.598632 | 0.514 | 0.259 | 1.74E-282 | Myeloid ce FLOT1    |
| 1108 | CHMP4B   | 1.56E-286 | 0.401363 | 0.308 | 0.115 | 2.93E-282 | Myeloid ce CHMP4B   |
| 1109 | CDC25B   | 3.47E-286 | -0.84576 | 0.057 | 0.289 | 6.52E-282 | Myeloid ce CDC25B   |
| 1110 | USP3     | 8.60E-286 | 0.467884 | 0.407 | 0.178 | 1.62E-281 | Myeloid ce USP3     |
| 1111 | RAN      | 1.96E-285 | -0.63101 | 0.639 | 0.747 | 3.68E-281 | Myeloid ce RAN      |
| 1112 | MTF1     | 3.52E-285 | 0.315309 | 0.151 | 0.035 | 6.61E-281 | Myeloid ce MTF1     |
| 1113 | GABBR1   | 8.20E-285 | 0.257356 | 0.108 | 0.018 | 1.54E-280 | Myeloid ce GABBR1   |
| 1114 | GCH1     | 8.96E-285 | 0.299992 | 0.172 | 0.044 | 1.68E-280 | Myeloid ce GCH1     |
| 1115 | STK40    | 1.85E-284 | 0.281527 | 0.148 | 0.033 | 3.47E-280 | Myeloid ce STK40    |
| 1116 | PIEZO1   | 2.01E-284 | 0.289162 | 0.158 | 0.038 | 3.78E-280 | Myeloid ce PIEZO1   |
| 1117 | RPLP1    | 5.07E-284 | -0.36086 | 0.981 | 0.999 | 9.53E-280 | Myeloid ce RPLP1    |
| 1118 | ST13     | 1.78E-283 | -0.73878 | 0.49  | 0.646 | 3.35E-279 | Myeloid ce ST13     |
| 1119 | FAM200B  | 2.08E-283 | 0.530392 | 0.4   | 0.177 | 3.91E-279 | Myeloid ce FAM200B  |
| 1120 | TUT7     | 3.90E-283 | 0.365518 | 0.225 | 0.07  | 7.33E-279 | Myeloid ce TUT7     |
| 1121 | TIMM8B   | 7.33E-282 | 0.447823 | 0.493 | 0.234 | 1.38E-277 | Myeloid ce TIMM8B   |
| 1122 | KCNK6    | 9.42E-281 | 0.281205 | 0.137 | 0.03  | 1.77E-276 | Myeloid ce KCNK6    |
| 1123 | YWHAE    | 9.69E-281 | 0.452492 | 0.492 | 0.234 | 1.82E-276 | Myeloid ce YWHAE    |
| 1124 | UNC119   | 2.45E-280 | 0.457602 | 0.412 | 0.181 | 4.60E-276 | Myeloid ce UNC119   |
| 1125 | TC2N     | 2.90E-280 | -0.82135 | 0.022 | 0.241 | 5.46E-276 | Myeloid ce TC2N     |
| 1126 | PPM1N    | 1.38E-279 | 0.275168 | 0.108 | 0.019 | 2.58E-275 | Myeloid ce PPM1N    |
| 1127 | AHR      | 1.51E-279 | 0.253251 | 0.111 | 0.02  | 2.84E-275 | Myeloid ce AHR      |

|      |         |           |          |       |       |           |                    |
|------|---------|-----------|----------|-------|-------|-----------|--------------------|
| 1128 | IMPDH2  | 2.85E-279 | -0.86121 | 0.188 | 0.409 | 5.35E-275 | Myeloid ce IMPDH2  |
| 1129 | CD4     | 6.93E-279 | 0.413227 | 0.335 | 0.13  | 1.30E-274 | Myeloid ce CD4     |
| 1130 | OXNAD1  | 4.72E-278 | -0.87401 | 0.046 | 0.271 | 8.87E-274 | Myeloid ce OXNAD1  |
| 1131 | RPL27   | 8.07E-278 | -0.44058 | 0.923 | 0.956 | 1.52E-273 | Myeloid ce RPL27   |
| 1132 | UBE2J1  | 3.56E-277 | 0.420998 | 0.485 | 0.227 | 6.68E-273 | Myeloid ce UBE2J1  |
| 1133 | PTEN    | 6.62E-277 | 0.396788 | 0.241 | 0.08  | 1.24E-272 | Myeloid ce PTEN    |
| 1134 | LPGAT1  | 1.83E-276 | 0.350552 | 0.206 | 0.061 | 3.44E-272 | Myeloid ce LPGAT1  |
| 1135 | BAX     | 2.57E-276 | 0.497043 | 0.627 | 0.352 | 4.83E-272 | Myeloid ce BAX     |
| 1136 | STAT6   | 1.26E-275 | 0.439954 | 0.401 | 0.173 | 2.36E-271 | Myeloid ce STAT6   |
| 1137 | TGOLN2  | 1.63E-275 | 0.460756 | 0.468 | 0.22  | 3.06E-271 | Myeloid ce TGOLN2  |
| 1138 | NRBF2   | 5.18E-275 | 0.432632 | 0.343 | 0.139 | 9.74E-271 | Myeloid ce NRBF2   |
| 1139 | GPX4    | 5.82E-275 | 0.611007 | 0.778 | 0.582 | 1.09E-270 | Myeloid ce GPX4    |
| 1140 | CYB5R4  | 3.54E-273 | 0.377305 | 0.309 | 0.117 | 6.65E-269 | Myeloid ce CYB5R4  |
| 1141 | NBPF10  | 8.09E-272 | 0.277659 | 0.15  | 0.035 | 1.52E-267 | Myeloid ce NBPF10  |
| 1142 | UQCRCQ  | 3.67E-271 | 0.52953  | 0.722 | 0.45  | 6.90E-267 | Myeloid ce UQCRCQ  |
| 1143 | CALM2   | 1.17E-270 | 0.555212 | 0.884 | 0.798 | 2.20E-266 | Myeloid ce CALM2   |
| 1144 | WAS     | 2.64E-270 | 0.52744  | 0.721 | 0.465 | 4.96E-266 | Myeloid ce WAS     |
| 1145 | APEX1   | 2.79E-270 | -0.78691 | 0.302 | 0.504 | 5.25E-266 | Myeloid ce APEX1   |
| 1146 | MTDH    | 3.59E-270 | 0.545852 | 0.677 | 0.406 | 6.74E-266 | Myeloid ce MTDH    |
| 1147 | LRPAP1  | 5.96E-270 | 0.450514 | 0.508 | 0.249 | 1.12E-265 | Myeloid ce LRPAP1  |
| 1148 | RCBTB2  | 6.13E-270 | 0.27941  | 0.17  | 0.045 | 1.15E-265 | Myeloid ce RCBTB2  |
| 1149 | SMAP2   | 1.01E-269 | 0.447546 | 0.462 | 0.217 | 1.90E-265 | Myeloid ce SMAP2   |
| 1150 | SDHB    | 1.13E-269 | 0.417304 | 0.409 | 0.182 | 2.13E-265 | Myeloid ce SDHB    |
| 1151 | HMOX2   | 8.54E-269 | -0.83111 | 0.204 | 0.419 | 1.60E-264 | Myeloid ce HMOX2   |
| 1152 | CD6     | 1.96E-267 | -0.77669 | 0.026 | 0.239 | 3.68E-263 | Myeloid ce CD6     |
| 1153 | Sep-07  | 2.79E-267 | -0.69878 | 0.541 | 0.667 | 5.25E-263 | Myeloid ce Sep-07  |
| 1154 | CTSC    | 8.71E-267 | 0.812567 | 0.539 | 0.308 | 1.64E-262 | Myeloid ce CTSC    |
| 1155 | EIF4E3  | 2.67E-265 | 0.293488 | 0.106 | 0.019 | 5.02E-261 | Myeloid ce EIF4E3  |
| 1156 | DOK1    | 5.77E-265 | 0.306154 | 0.255 | 0.087 | 1.08E-260 | Myeloid ce DOK1    |
| 1157 | MPST    | 5.22E-264 | 0.326713 | 0.212 | 0.066 | 9.81E-260 | Myeloid ce MPST    |
| 1158 | CCDC88B | 2.95E-263 | 0.360066 | 0.17  | 0.046 | 5.54E-259 | Myeloid ce CCDC88B |
| 1159 | TFE3    | 6.30E-263 | 0.254621 | 0.133 | 0.029 | 1.18E-258 | Myeloid ce TFE3    |
| 1160 | BUB3    | 7.46E-263 | -0.794   | 0.272 | 0.468 | 1.40E-258 | Myeloid ce BUB3    |
| 1161 | HM13    | 2.87E-262 | 0.46905  | 0.547 | 0.287 | 5.38E-258 | Myeloid ce HM13    |
| 1162 | COX17   | 8.65E-262 | 0.492817 | 0.527 | 0.271 | 1.62E-257 | Myeloid ce COX17   |
| 1163 | PTP4A2  | 1.64E-260 | 0.483527 | 0.541 | 0.283 | 3.08E-256 | Myeloid ce PTP4A2  |
| 1164 | SELL    | 1.31E-259 | -0.68208 | 0.663 | 0.771 | 2.46E-255 | Myeloid ce SELL    |
| 1165 | DNTTIP1 | 1.56E-259 | 0.307881 | 0.249 | 0.086 | 2.92E-255 | Myeloid ce DNTTIP1 |
| 1166 | DGKA    | 1.74E-259 | -0.84575 | 0.123 | 0.345 | 3.27E-255 | Myeloid ce DGKA    |
| 1167 | TNRC18  | 1.88E-259 | 0.255063 | 0.119 | 0.024 | 3.52E-255 | Myeloid ce TNRC18  |
| 1168 | ITK     | 1.30E-258 | -0.78424 | 0.03  | 0.241 | 2.44E-254 | Myeloid ce ITK     |
| 1169 | SLC12A9 | 3.70E-258 | 0.311587 | 0.169 | 0.046 | 6.94E-254 | Myeloid ce SLC12A9 |
| 1170 | GMFG    | 3.44E-257 | 0.50073  | 0.92  | 0.746 | 6.45E-253 | Myeloid ce GMFG    |
| 1171 | HMGB2   | 4.40E-257 | 0.558502 | 0.478 | 0.244 | 8.27E-253 | Myeloid ce HMGB2   |
| 1172 | METTL22 | 7.97E-257 | 0.289894 | 0.162 | 0.043 | 1.50E-252 | Myeloid ce METTL22 |
| 1173 | ARRDC1  | 1.17E-256 | 0.429274 | 0.472 | 0.225 | 2.20E-252 | Myeloid ce ARRDC1  |
| 1174 | MAP3K8  | 1.76E-256 | 0.304435 | 0.29  | 0.107 | 3.30E-252 | Myeloid ce MAP3K8  |

|      |         |           |          |       |       |           |                    |
|------|---------|-----------|----------|-------|-------|-----------|--------------------|
| 1175 | WDFY2   | 1.78E-256 | 0.316006 | 0.227 | 0.074 | 3.34E-252 | Myeloid ce WDFY2   |
| 1176 | B2M     | 2.67E-256 | -0.32782 | 0.999 | 0.999 | 5.02E-252 | Myeloid ce B2M     |
| 1177 | AKIRIN2 | 1.22E-255 | 0.401582 | 0.405 | 0.182 | 2.29E-251 | Myeloid ce AKIRIN2 |
| 1178 | HK1     | 2.63E-255 | 0.380005 | 0.328 | 0.133 | 4.94E-251 | Myeloid ce HK1     |
| 1179 | IGF2R   | 4.61E-254 | 0.363746 | 0.19  | 0.057 | 8.66E-250 | Myeloid ce IGF2R   |
| 1180 | MGAT1   | 1.35E-253 | 0.457456 | 0.496 | 0.25  | 2.54E-249 | Myeloid ce MGAT1   |
| 1181 | NBPF26  | 1.83E-253 | 0.270974 | 0.142 | 0.034 | 3.43E-249 | Myeloid ce NBPF26  |
| 1182 | UBE2D2  | 2.24E-253 | -0.59178 | 0.637 | 0.733 | 4.21E-249 | Myeloid ce UBE2D2  |
| 1183 | MOSPD2  | 2.02E-252 | 0.27245  | 0.154 | 0.039 | 3.79E-248 | Myeloid ce MOSPD2  |
| 1184 | COX7B   | 2.03E-252 | 0.531167 | 0.707 | 0.463 | 3.80E-248 | Myeloid ce COX7B   |
| 1185 | SH3TC1  | 2.69E-252 | 0.252915 | 0.173 | 0.048 | 5.05E-248 | Myeloid ce SH3TC1  |
| 1186 | RIN3    | 2.92E-252 | 0.426645 | 0.425 | 0.194 | 5.49E-248 | Myeloid ce RIN3    |
| 1187 | RPL17   | 3.49E-252 | -0.66237 | 0.622 | 0.724 | 6.56E-248 | Myeloid ce RPL17   |
| 1188 | SLA     | 9.10E-251 | 0.403399 | 0.307 | 0.122 | 1.71E-246 | Myeloid ce SLA     |
| 1189 | CYTH4   | 1.19E-250 | 0.42155  | 0.376 | 0.164 | 2.24E-246 | Myeloid ce CYTH4   |
| 1190 | RPL36A  | 2.08E-250 | -0.67166 | 0.722 | 0.814 | 3.92E-246 | Myeloid ce RPL36A  |
| 1191 | NPLOC4  | 3.09E-250 | 0.269228 | 0.131 | 0.03  | 5.81E-246 | Myeloid ce NPLOC4  |
| 1192 | IRF1    | 4.84E-250 | 0.578239 | 0.633 | 0.374 | 9.10E-246 | Myeloid ce IRF1    |
| 1193 | AP2A1   | 1.78E-249 | 0.361618 | 0.304 | 0.121 | 3.34E-245 | Myeloid ce AP2A1   |
| 1194 | HNRNPF  | 2.47E-249 | -0.63686 | 0.592 | 0.706 | 4.64E-245 | Myeloid ce HNRNPF  |
| 1195 | MAST3   | 7.27E-249 | 0.269125 | 0.153 | 0.039 | 1.37E-244 | Myeloid ce MAST3   |
| 1196 | TOMM7   | 1.84E-248 | -0.55625 | 0.774 | 0.827 | 3.45E-244 | Myeloid ce TOMM7   |
| 1197 | SLC1A5  | 4.50E-248 | 0.280053 | 0.177 | 0.051 | 8.45E-244 | Myeloid ce SLC1A5  |
| 1198 | COMMD9  | 7.25E-248 | 0.332135 | 0.334 | 0.136 | 1.36E-243 | Myeloid ce COMMD9  |
| 1199 | ATP5PD  | 1.28E-247 | 0.489089 | 0.768 | 0.524 | 2.41E-243 | Myeloid ce ATP5PD  |
| 1200 | ANO6    | 3.70E-247 | 0.304292 | 0.191 | 0.058 | 6.95E-243 | Myeloid ce ANO6    |
| 1201 | PDCD4   | 6.61E-247 | -0.83473 | 0.214 | 0.419 | 1.24E-242 | Myeloid ce PDCD4   |
| 1202 | TMOD3   | 1.29E-246 | 0.415157 | 0.458 | 0.22  | 2.42E-242 | Myeloid ce TMOD3   |
| 1203 | NDUFB1  | 1.32E-246 | 0.514718 | 0.658 | 0.386 | 2.48E-242 | Myeloid ce NDUFB1  |
| 1204 | SOCS3   | 1.37E-246 | 0.522504 | 0.328 | 0.139 | 2.58E-242 | Myeloid ce SOCS3   |
| 1205 | IFIT2   | 1.52E-246 | 0.353615 | 0.156 | 0.041 | 2.86E-242 | Myeloid ce IFIT2   |
| 1206 | LMNB1   | 1.53E-246 | 0.451226 | 0.239 | 0.086 | 2.88E-242 | Myeloid ce LMNB1   |
| 1207 | COMMD6  | 2.22E-246 | -0.46014 | 0.885 | 0.919 | 4.17E-242 | Myeloid ce COMMD6  |
| 1208 | DBI     | 3.76E-246 | 0.455562 | 0.798 | 0.575 | 7.06E-242 | Myeloid ce DBI     |
| 1209 | ATP5MF  | 5.16E-246 | 0.484106 | 0.81  | 0.614 | 9.69E-242 | Myeloid ce ATP5MF  |
| 1210 | PRDX2   | 1.02E-245 | -0.78184 | 0.253 | 0.456 | 1.91E-241 | Myeloid ce PRDX2   |
| 1211 | MAPK1   | 1.38E-245 | 0.323573 | 0.258 | 0.093 | 2.59E-241 | Myeloid ce MAPK1   |
| 1212 | SCAND1  | 1.44E-245 | 0.50413  | 0.689 | 0.425 | 2.70E-241 | Myeloid ce SCAND1  |
| 1213 | NCOR2   | 8.51E-245 | 0.262709 | 0.137 | 0.033 | 1.60E-240 | Myeloid ce NCOR2   |
| 1214 | STMN1   | 8.55E-245 | -0.83401 | 0.084 | 0.304 | 1.61E-240 | Myeloid ce STMN1   |
| 1215 | ANXA2R  | 1.41E-243 | -0.78196 | 0.079 | 0.29  | 2.66E-239 | Myeloid ce ANXA2R  |
| 1216 | ANAPC16 | 1.78E-243 | -0.64126 | 0.578 | 0.692 | 3.34E-239 | Myeloid ce ANAPC16 |
| 1217 | SLC2A3  | 3.05E-243 | 0.943067 | 0.397 | 0.201 | 5.73E-239 | Myeloid ce SLC2A3  |
| 1218 | SCLT1   | 4.35E-242 | 0.280997 | 0.185 | 0.055 | 8.17E-238 | Myeloid ce SCLT1   |
| 1219 | ITGAL   | 1.22E-241 | 0.378975 | 0.316 | 0.129 | 2.29E-237 | Myeloid ce ITGAL   |
| 1220 | KLHL18  | 1.86E-241 | 0.263316 | 0.159 | 0.043 | 3.50E-237 | Myeloid ce KLHL18  |
| 1221 | ORAI3   | 2.06E-241 | 0.259816 | 0.182 | 0.053 | 3.86E-237 | Myeloid ce ORAI3   |

|      |            |           |          |       |       |           |            |            |
|------|------------|-----------|----------|-------|-------|-----------|------------|------------|
| 1222 | NDUFA1     | 3.03E-241 | 0.48692  | 0.817 | 0.597 | 5.68E-237 | Myeloid ce | NDUFA1     |
| 1223 | PRKACB     | 4.26E-241 | -0.73641 | 0.065 | 0.274 | 7.99E-237 | Myeloid ce | PRKACB     |
| 1224 | SOD1       | 9.98E-240 | -0.57376 | 0.559 | 0.714 | 1.87E-235 | Myeloid ce | SOD1       |
| 1225 | PIP4P2     | 6.08E-239 | 0.326567 | 0.198 | 0.063 | 1.14E-234 | Myeloid ce | PIP4P2     |
| 1226 | MX2        | 6.12E-239 | 0.406331 | 0.363 | 0.158 | 1.15E-234 | Myeloid ce | MX2        |
| 1227 | PSEN1      | 7.87E-239 | 0.285268 | 0.196 | 0.061 | 1.48E-234 | Myeloid ce | PSEN1      |
| 1228 | CD8B       | 8.02E-239 | -1.65347 | 0.029 | 0.226 | 1.51E-234 | Myeloid ce | CD8B       |
| 1229 | IFI35      | 1.25E-238 | 0.39865  | 0.403 | 0.186 | 2.36E-234 | Myeloid ce | IFI35      |
| 1230 | PRMT2      | 1.72E-238 | -0.8168  | 0.401 | 0.551 | 3.24E-234 | Myeloid ce | PRMT2      |
| 1231 | MICAL1     | 4.62E-238 | 0.344685 | 0.29  | 0.114 | 8.68E-234 | Myeloid ce | MICAL1     |
| 1232 | ZNHIT1     | 7.91E-238 | 0.449812 | 0.58  | 0.321 | 1.49E-233 | Myeloid ce | ZNHIT1     |
| 1233 | PRDX3      | 1.25E-237 | 0.446599 | 0.54  | 0.292 | 2.35E-233 | Myeloid ce | PRDX3      |
| 1234 | FLII       | 1.31E-237 | 0.377092 | 0.368 | 0.163 | 2.46E-233 | Myeloid ce | FLII       |
| 1235 | CD96       | 1.34E-237 | -0.68829 | 0.022 | 0.215 | 2.51E-233 | Myeloid ce | CD96       |
| 1236 | CDK5       | 3.62E-237 | 0.271544 | 0.201 | 0.065 | 6.80E-233 | Myeloid ce | CDK5       |
| 1237 | MTHFS      | 5.55E-236 | 0.390167 | 0.369 | 0.164 | 1.04E-231 | Myeloid ce | MTHFS      |
| 1238 | XRCC6      | 1.37E-235 | -0.64155 | 0.468 | 0.615 | 2.58E-231 | Myeloid ce | XRCC6      |
| 1239 | ATP2B1-AS1 | 3.31E-235 | 0.38003  | 0.22  | 0.075 | 6.21E-231 | Myeloid ce | ATP2B1-AS1 |
| 1240 | ROMO1      | 1.35E-234 | 0.488469 | 0.669 | 0.406 | 2.54E-230 | Myeloid ce | ROMO1      |
| 1241 | ARHGAP15   | 1.75E-234 | -0.74604 | 0.176 | 0.39  | 3.28E-230 | Myeloid ce | ARHGAP15   |
| 1242 | RNF141     | 3.19E-234 | 0.330604 | 0.324 | 0.133 | 6.00E-230 | Myeloid ce | RNF141     |
| 1243 | RARRES3    | 8.57E-234 | -0.87542 | 0.411 | 0.574 | 1.61E-229 | Myeloid ce | RARRES3    |
| 1244 | HEBP2      | 6.16E-233 | 0.349708 | 0.213 | 0.073 | 1.16E-228 | Myeloid ce | HEBP2      |
| 1245 | CLTB       | 1.44E-232 | 0.366866 | 0.386 | 0.176 | 2.70E-228 | Myeloid ce | CLTB       |
| 1246 | HDLBP      | 1.72E-232 | 0.335198 | 0.3   | 0.121 | 3.24E-228 | Myeloid ce | HDLBP      |
| 1247 | SHOC2      | 7.73E-232 | 0.392773 | 0.349 | 0.154 | 1.45E-227 | Myeloid ce | SHOC2      |
| 1248 | FOXP1      | 7.87E-232 | -0.84074 | 0.27  | 0.455 | 1.48E-227 | Myeloid ce | FOXP1      |
| 1249 | CDKN2D     | 2.52E-231 | 0.406007 | 0.382 | 0.174 | 4.74E-227 | Myeloid ce | CDKN2D     |
| 1250 | PRMT1      | 1.11E-230 | -0.77522 | 0.238 | 0.427 | 2.08E-226 | Myeloid ce | PRMT1      |
| 1251 | FAM89B     | 2.56E-230 | 0.257949 | 0.161 | 0.046 | 4.81E-226 | Myeloid ce | FAM89B     |
| 1252 | ITGA5      | 5.39E-230 | 0.28492  | 0.161 | 0.046 | 1.01E-225 | Myeloid ce | ITGA5      |
| 1253 | TAGAP      | 2.65E-229 | -0.86378 | 0.232 | 0.43  | 4.98E-225 | Myeloid ce | TAGAP      |
| 1254 | PSMA7      | 6.79E-229 | 0.464393 | 0.832 | 0.666 | 1.28E-224 | Myeloid ce | PSMA7      |
| 1255 | CD19       | 6.83E-229 | -1.05625 | 0.027 | 0.217 | 1.28E-224 | Myeloid ce | CD19       |
| 1256 | ARL4C      | 1.28E-228 | -0.77432 | 0.083 | 0.29  | 2.41E-224 | Myeloid ce | ARL4C      |
| 1257 | LY9        | 6.79E-228 | -0.6688  | 0.026 | 0.216 | 1.28E-223 | Myeloid ce | LY9        |
| 1258 | AKAP13     | 9.17E-228 | 0.457547 | 0.515 | 0.272 | 1.72E-223 | Myeloid ce | AKAP13     |
| 1259 | ENO1       | 2.86E-226 | 0.488118 | 0.814 | 0.624 | 5.36E-222 | Myeloid ce | ENO1       |
| 1260 | RPL37A     | 2.88E-226 | -0.53736 | 0.778 | 0.845 | 5.41E-222 | Myeloid ce | RPL37A     |
| 1261 | MSRA       | 3.49E-225 | 0.253306 | 0.201 | 0.065 | 6.55E-221 | Myeloid ce | MSRA       |
| 1262 | MANBA      | 5.25E-225 | 0.306767 | 0.272 | 0.105 | 9.87E-221 | Myeloid ce | MANBA      |
| 1263 | BACH2      | 5.51E-224 | -0.79224 | 0.033 | 0.223 | 1.03E-219 | Myeloid ce | BACH2      |
| 1264 | MAN2B1     | 1.46E-223 | 0.34882  | 0.328 | 0.141 | 2.75E-219 | Myeloid ce | MAN2B1     |
| 1265 | TRIM8      | 1.58E-223 | 0.322314 | 0.24  | 0.088 | 2.97E-219 | Myeloid ce | TRIM8      |
| 1266 | BANK1      | 1.59E-223 | -1.16719 | 0.041 | 0.23  | 2.99E-219 | Myeloid ce | BANK1      |
| 1267 | ACAP1      | 2.13E-223 | -0.66288 | 0.309 | 0.515 | 4.00E-219 | Myeloid ce | ACAP1      |
| 1268 | OS9        | 1.24E-222 | 0.388432 | 0.449 | 0.221 | 2.33E-218 | Myeloid ce | OS9        |

|      |          |           |          |       |       |           |                     |
|------|----------|-----------|----------|-------|-------|-----------|---------------------|
| 1269 | GIMAP8   | 1.56E-222 | 0.318345 | 0.241 | 0.088 | 2.93E-218 | Myeloid ce GIMAP8   |
| 1270 | FBXO6    | 7.66E-222 | 0.251928 | 0.208 | 0.07  | 1.44E-217 | Myeloid ce FBXO6    |
| 1271 | KIAA0232 | 3.73E-221 | 0.26089  | 0.137 | 0.036 | 7.00E-217 | Myeloid ce KIAA0232 |
| 1272 | IGFLR1   | 3.78E-221 | 0.341635 | 0.342 | 0.149 | 7.09E-217 | Myeloid ce IGFLR1   |
| 1273 | ZBTB7A   | 1.02E-220 | 0.318037 | 0.215 | 0.075 | 1.92E-216 | Myeloid ce ZBTB7A   |
| 1274 | MTX1     | 2.15E-220 | 0.3965   | 0.321 | 0.141 | 4.04E-216 | Myeloid ce MTX1     |
| 1275 | C1QBP    | 2.22E-220 | -0.67263 | 0.447 | 0.578 | 4.16E-216 | Myeloid ce C1QBP    |
| 1276 | COX5A    | 6.24E-220 | 0.47791  | 0.744 | 0.538 | 1.17E-215 | Myeloid ce COX5A    |
| 1277 | GTF3A    | 1.11E-219 | -0.67867 | 0.47  | 0.597 | 2.08E-215 | Myeloid ce GTF3A    |
| 1278 | STMP1    | 2.90E-219 | 0.424384 | 0.597 | 0.34  | 5.45E-215 | Myeloid ce STMP1    |
| 1279 | NCKAP1L  | 7.22E-219 | 0.391115 | 0.437 | 0.216 | 1.36E-214 | Myeloid ce NCKAP1L  |
| 1280 | TMBIM4   | 7.50E-219 | 0.326023 | 0.33  | 0.141 | 1.41E-214 | Myeloid ce TMBIM4   |
| 1281 | TTC7A    | 2.45E-218 | 0.281326 | 0.161 | 0.048 | 4.61E-214 | Myeloid ce TTC7A    |
| 1282 | MAP3K2   | 9.08E-218 | 0.298787 | 0.188 | 0.061 | 1.71E-213 | Myeloid ce MAP3K2   |
| 1283 | PRDX1    | 1.05E-217 | 0.532553 | 0.71  | 0.516 | 1.96E-213 | Myeloid ce PRDX1    |
| 1284 | CRIP1    | 1.10E-217 | 0.627579 | 0.604 | 0.356 | 2.06E-213 | Myeloid ce CRIP1    |
| 1285 | SAMD3    | 4.56E-217 | -0.68907 | 0.013 | 0.189 | 8.56E-213 | Myeloid ce SAMD3    |
| 1286 | SCML4    | 5.95E-217 | -0.6446  | 0.021 | 0.2   | 1.12E-212 | Myeloid ce SCML4    |
| 1287 | RNPEPL1  | 6.80E-217 | 0.342773 | 0.263 | 0.103 | 1.28E-212 | Myeloid ce RNPEPL1  |
| 1288 | YWHAB    | 1.06E-216 | 0.381    | 0.91  | 0.796 | 1.99E-212 | Myeloid ce YWHAB    |
| 1289 | DENND4B  | 1.82E-216 | 0.281899 | 0.193 | 0.063 | 3.42E-212 | Myeloid ce DENND4B  |
| 1290 | PRF1     | 2.37E-216 | -1.90709 | 0.017 | 0.195 | 4.46E-212 | Myeloid ce PRF1     |
| 1291 | IQGAP2   | 8.23E-216 | 0.359754 | 0.269 | 0.108 | 1.55E-211 | Myeloid ce IQGAP2   |
| 1292 | NBPF19   | 2.14E-215 | 0.332878 | 0.212 | 0.074 | 4.01E-211 | Myeloid ce NBPF19   |
| 1293 | CCT3     | 2.35E-215 | -0.70292 | 0.349 | 0.507 | 4.42E-211 | Myeloid ce CCT3     |
| 1294 | STX12    | 2.64E-215 | 0.294879 | 0.279 | 0.111 | 4.96E-211 | Myeloid ce STX12    |
| 1295 | CAPN2    | 4.20E-215 | 0.336208 | 0.384 | 0.177 | 7.90E-211 | Myeloid ce CAPN2    |
| 1296 | ITGB7    | 6.23E-215 | -0.73258 | 0.077 | 0.271 | 1.17E-210 | Myeloid ce ITGB7    |
| 1297 | EIF3L    | 1.27E-214 | -0.58717 | 0.601 | 0.704 | 2.39E-210 | Myeloid ce EIF3L    |
| 1298 | PSIP1    | 3.38E-214 | -0.74129 | 0.2   | 0.39  | 6.34E-210 | Myeloid ce PSIP1    |
| 1299 | COPE     | 3.85E-214 | 0.447678 | 0.707 | 0.458 | 7.23E-210 | Myeloid ce COPE     |
| 1300 | LIMK2    | 6.50E-213 | 0.358472 | 0.122 | 0.03  | 1.22E-208 | Myeloid ce LIMK2    |
| 1301 | USP15    | 7.12E-213 | 0.514172 | 0.55  | 0.313 | 1.34E-208 | Myeloid ce USP15    |
| 1302 | NDUFV3   | 1.62E-212 | 0.305419 | 0.279 | 0.113 | 3.05E-208 | Myeloid ce NDUFV3   |
| 1303 | IGHM     | 5.11E-212 | -1.6227  | 0.087 | 0.281 | 9.60E-208 | Myeloid ce IGHM     |
| 1304 | NDUFB3   | 9.53E-212 | 0.437033 | 0.625 | 0.373 | 1.79E-207 | Myeloid ce NDUFB3   |
| 1305 | PNISR    | 1.53E-211 | -0.67892 | 0.425 | 0.572 | 2.87E-207 | Myeloid ce PNISR    |
| 1306 | MYL12A   | 4.35E-211 | -0.45882 | 0.938 | 0.947 | 8.18E-207 | Myeloid ce MYL12A   |
| 1307 | NDUFS6   | 6.06E-211 | 0.432206 | 0.584 | 0.336 | 1.14E-206 | Myeloid ce NDUFS6   |
| 1308 | CCT4     | 6.91E-211 | -0.66521 | 0.382 | 0.531 | 1.30E-206 | Myeloid ce CCT4     |
| 1309 | ADAM10   | 8.49E-211 | 0.365434 | 0.354 | 0.161 | 1.60E-206 | Myeloid ce ADAM10   |
| 1310 | DYNLL1   | 1.31E-210 | 0.439074 | 0.64  | 0.389 | 2.46E-206 | Myeloid ce DYNLL1   |
| 1311 | TMEM33   | 3.19E-210 | 0.272877 | 0.185 | 0.061 | 6.00E-206 | Myeloid ce TMEM33   |
| 1312 | SIRPG    | 4.12E-210 | -0.65866 | 0.019 | 0.194 | 7.75E-206 | Myeloid ce SIRPG    |
| 1313 | EIF3F    | 1.09E-209 | -0.50367 | 0.718 | 0.793 | 2.05E-205 | Myeloid ce EIF3F    |
| 1314 | RAB2A    | 1.19E-209 | 0.411092 | 0.538 | 0.297 | 2.24E-205 | Myeloid ce RAB2A    |
| 1315 | EP300    | 1.52E-209 | 0.29563  | 0.21  | 0.074 | 2.85E-205 | Myeloid ce EP300    |



|                |           |          |       |       |           |                       |
|----------------|-----------|----------|-------|-------|-----------|-----------------------|
| 1316 ILK       | 2.98E-209 | 0.351043 | 0.461 | 0.234 | 5.60E-205 | Myeloid ce ILK        |
| 1317 RFLNB     | 6.14E-209 | 0.338022 | 0.138 | 0.038 | 1.15E-204 | Myeloid ce RFLNB      |
| 1318 NUCB2     | 6.62E-209 | -0.81308 | 0.194 | 0.382 | 1.24E-204 | Myeloid ce NUCB2      |
| 1319 AL133415  | 8.79E-209 | 0.355496 | 0.156 | 0.047 | 1.65E-204 | Myeloid ce AL133415.1 |
| 1320 SFT2D2    | 3.66E-208 | 0.275538 | 0.227 | 0.083 | 6.88E-204 | Myeloid ce SFT2D2     |
| 1321 VPRED3    | 7.13E-208 | -1.20726 | 0.03  | 0.208 | 1.34E-203 | Myeloid ce VPRED3     |
| 1322 LINC00926 | 8.69E-208 | -1.07116 | 0.033 | 0.212 | 1.63E-203 | Myeloid ce LINC00926  |
| 1323 RGCC      | 5.11E-207 | -0.71942 | 0.046 | 0.229 | 9.59E-203 | Myeloid ce RGCC       |
| 1324 TMEM165   | 5.27E-207 | 0.347399 | 0.332 | 0.149 | 9.90E-203 | Myeloid ce TMEM165    |
| 1325 SNHG8     | 9.88E-207 | -0.77546 | 0.294 | 0.464 | 1.86E-202 | Myeloid ce SNHG8      |
| 1326 DDAH2     | 5.60E-206 | 0.327968 | 0.317 | 0.137 | 1.05E-201 | Myeloid ce DDAH2      |
| 1327 CAP1      | 6.02E-206 | 0.460129 | 0.77  | 0.558 | 1.13E-201 | Myeloid ce CAP1       |
| 1328 HIPK1     | 6.61E-206 | 0.255526 | 0.145 | 0.041 | 1.24E-201 | Myeloid ce HIPK1      |
| 1329 TMEM243   | 1.51E-205 | -0.73292 | 0.238 | 0.42  | 2.84E-201 | Myeloid ce TMEM243    |
| 1330 STMN3     | 1.72E-205 | -0.63838 | 0.034 | 0.212 | 3.22E-201 | Myeloid ce STMN3      |
| 1331 HOOK3     | 3.13E-205 | 0.311067 | 0.268 | 0.108 | 5.87E-201 | Myeloid ce HOOK3      |
| 1332 SSR3      | 3.54E-205 | 0.338211 | 0.492 | 0.257 | 6.65E-201 | Myeloid ce SSR3       |
| 1333 YIF1B     | 1.04E-204 | 0.349349 | 0.364 | 0.171 | 1.96E-200 | Myeloid ce YIF1B      |
| 1334 HNRNPK    | 1.20E-204 | -0.54546 | 0.674 | 0.753 | 2.25E-200 | Myeloid ce HNRNPK     |
| 1335 RBX1      | 8.91E-204 | 0.449541 | 0.718 | 0.491 | 1.67E-199 | Myeloid ce RBX1       |
| 1336 CD8A      | 2.33E-203 | -1.08104 | 0.02  | 0.19  | 4.38E-199 | Myeloid ce CD8A       |
| 1337 SPCS3     | 7.31E-203 | 0.308338 | 0.409 | 0.195 | 1.37E-198 | Myeloid ce SPCS3      |
| 1338 CHCHD5    | 1.82E-202 | 0.357358 | 0.406 | 0.199 | 3.41E-198 | Myeloid ce CHCHD5     |
| 1339 VTI1B     | 2.30E-202 | 0.352395 | 0.426 | 0.212 | 4.32E-198 | Myeloid ce VTI1B      |
| 1340 ID3       | 5.31E-202 | -0.88829 | 0.046 | 0.224 | 9.98E-198 | Myeloid ce ID3        |
| 1341 C16orf72  | 7.01E-201 | 0.288515 | 0.144 | 0.042 | 1.32E-196 | Myeloid ce C16orf72   |
| 1342 CXCR4     | 1.72E-200 | -0.871   | 0.151 | 0.348 | 3.23E-196 | Myeloid ce CXCR4      |
| 1343 ADD3      | 2.47E-200 | -0.68724 | 0.345 | 0.51  | 4.64E-196 | Myeloid ce ADD3       |
| 1344 PGK1      | 2.49E-200 | 0.511824 | 0.813 | 0.675 | 4.68E-196 | Myeloid ce PGK1       |
| 1345 ECE1      | 3.84E-200 | 0.334311 | 0.188 | 0.065 | 7.21E-196 | Myeloid ce ECE1       |
| 1346 TMIGD2    | 6.81E-200 | -0.65281 | 0.034 | 0.208 | 1.28E-195 | Myeloid ce TMIGD2     |
| 1347 FCRLA     | 7.29E-200 | -0.99292 | 0.025 | 0.195 | 1.37E-195 | Myeloid ce FCRLA      |
| 1348 TMEM204   | 8.90E-200 | -0.62588 | 0.025 | 0.196 | 1.67E-195 | Myeloid ce TMEM204    |
| 1349 GUSB      | 9.00E-200 | 0.302209 | 0.308 | 0.134 | 1.69E-195 | Myeloid ce GUSB       |
| 1350 TRABD2A   | 1.29E-199 | -0.65793 | 0.029 | 0.2   | 2.42E-195 | Myeloid ce TRABD2A    |
| 1351 TCL1A     | 2.62E-199 | -1.81071 | 0.047 | 0.226 | 4.93E-195 | Myeloid ce TCL1A      |
| 1352 PARVB     | 4.37E-199 | 0.250876 | 0.222 | 0.083 | 8.21E-195 | Myeloid ce PARVB      |
| 1353 RNASE6    | 6.16E-199 | 0.323207 | 0.243 | 0.094 | 1.16E-194 | Myeloid ce RNASE6     |
| 1354 FBXO9     | 1.11E-198 | 0.367948 | 0.347 | 0.162 | 2.09E-194 | Myeloid ce FBXO9      |
| 1355 DNAJC3    | 1.89E-196 | 0.325558 | 0.299 | 0.13  | 3.56E-192 | Myeloid ce DNAJC3     |
| 1356 FAM50A    | 2.94E-196 | 0.329654 | 0.405 | 0.199 | 5.53E-192 | Myeloid ce FAM50A     |
| 1357 DGKZ      | 2.32E-195 | 0.351323 | 0.306 | 0.135 | 4.36E-191 | Myeloid ce DGKZ       |
| 1358 TNFAIP8L2 | 9.01E-195 | 0.320143 | 0.342 | 0.156 | 1.69E-190 | Myeloid ce TNFAIP8L2  |
| 1359 MKNK1     | 8.87E-194 | 0.272298 | 0.169 | 0.056 | 1.67E-189 | Myeloid ce MKNK1      |
| 1360 INSIG1    | 5.39E-193 | 0.528296 | 0.247 | 0.104 | 1.01E-188 | Myeloid ce INSIG1     |
| 1361 CAPZA1    | 7.01E-193 | 0.38859  | 0.495 | 0.271 | 1.32E-188 | Myeloid ce CAPZA1     |
| 1362 STK10     | 9.25E-193 | 0.353051 | 0.392 | 0.193 | 1.74E-188 | Myeloid ce STK10      |

|      |          |           |          |       |       |           |            |          |
|------|----------|-----------|----------|-------|-------|-----------|------------|----------|
| 1363 | TECR     | 2.05E-192 | -0.71035 | 0.308 | 0.46  | 3.84E-188 | Myeloid ce | TECR     |
| 1364 | SRSF8    | 2.52E-191 | -0.66549 | 0.08  | 0.258 | 4.73E-187 | Myeloid ce | SRSF8    |
| 1365 | CCNI     | 3.33E-191 | -0.43809 | 0.835 | 0.875 | 6.25E-187 | Myeloid ce | CCNI     |
| 1366 | PRKCB    | 4.74E-191 | 0.330226 | 0.361 | 0.171 | 8.90E-187 | Myeloid ce | PRKCB    |
| 1367 | HNRNPA0  | 5.48E-191 | -0.65726 | 0.392 | 0.527 | 1.03E-186 | Myeloid ce | HNRNPA0  |
| 1368 | MSL1     | 1.12E-190 | 0.298014 | 0.147 | 0.045 | 2.11E-186 | Myeloid ce | MSL1     |
| 1369 | SEM1     | 1.33E-190 | 0.415933 | 0.633 | 0.388 | 2.50E-186 | Myeloid ce | SEM1     |
| 1370 | HAUS4    | 4.46E-190 | 0.323654 | 0.281 | 0.122 | 8.38E-186 | Myeloid ce | HAUS4    |
| 1371 | LEPROTL1 | 1.38E-189 | -0.80342 | 0.39  | 0.516 | 2.59E-185 | Myeloid ce | LEPROTL1 |
| 1372 | DEK      | 1.81E-189 | 0.385017 | 0.541 | 0.3   | 3.40E-185 | Myeloid ce | DEK      |
| 1373 | SHISAL2A | 2.41E-189 | -0.58349 | 0.023 | 0.185 | 4.53E-185 | Myeloid ce | SHISAL2A |
| 1374 | PQLC3    | 9.24E-189 | 0.30992  | 0.316 | 0.143 | 1.74E-184 | Myeloid ce | PQLC3    |
| 1375 | LASP1    | 1.13E-188 | 0.339091 | 0.305 | 0.136 | 2.12E-184 | Myeloid ce | LASP1    |
| 1376 | SLIRP    | 3.63E-188 | 0.338213 | 0.415 | 0.21  | 6.82E-184 | Myeloid ce | SLIRP    |
| 1377 | MBD6     | 3.64E-188 | 0.256875 | 0.134 | 0.038 | 6.84E-184 | Myeloid ce | MBD6     |
| 1378 | PHF1     | 3.76E-188 | -0.66427 | 0.087 | 0.265 | 7.06E-184 | Myeloid ce | PHF1     |
| 1379 | RBL2     | 3.96E-188 | -0.72633 | 0.23  | 0.405 | 7.44E-184 | Myeloid ce | RBL2     |
| 1380 | LSM6     | 4.43E-188 | 0.433227 | 0.599 | 0.366 | 8.32E-184 | Myeloid ce | LSM6     |
| 1381 | TXK      | 5.38E-188 | -0.59595 | 0.02  | 0.181 | 1.01E-183 | Myeloid ce | TXK      |
| 1382 | PCBP1    | 8.98E-188 | -0.42894 | 0.84  | 0.878 | 1.69E-183 | Myeloid ce | PCBP1    |
| 1383 | SSR2     | 3.33E-187 | -0.51521 | 0.683 | 0.748 | 6.25E-183 | Myeloid ce | SSR2     |
| 1384 | SATB1    | 1.30E-186 | -0.71197 | 0.086 | 0.265 | 2.44E-182 | Myeloid ce | SATB1    |
| 1385 | ATP6V1C1 | 1.53E-186 | 0.267454 | 0.194 | 0.07  | 2.87E-182 | Myeloid ce | ATP6V1C1 |
| 1386 | ACAA1    | 3.84E-186 | 0.376011 | 0.478 | 0.261 | 7.21E-182 | Myeloid ce | ACAA1    |
| 1387 | DCP2     | 4.38E-186 | 0.326197 | 0.34  | 0.16  | 8.23E-182 | Myeloid ce | DCP2     |
| 1388 | GBP2     | 6.38E-186 | 0.417464 | 0.347 | 0.169 | 1.20E-181 | Myeloid ce | GBP2     |
| 1389 | SH3YL1   | 1.08E-185 | -0.62403 | 0.047 | 0.215 | 2.02E-181 | Myeloid ce | SH3YL1   |
| 1390 | REL      | 4.71E-185 | 0.305964 | 0.421 | 0.209 | 8.85E-181 | Myeloid ce | REL      |
| 1391 | ACOX1    | 5.48E-185 | 0.255121 | 0.143 | 0.043 | 1.03E-180 | Myeloid ce | ACOX1    |
| 1392 | OGDH     | 1.03E-184 | 0.27735  | 0.209 | 0.079 | 1.93E-180 | Myeloid ce | OGDH     |
| 1393 | NUCB1    | 2.07E-184 | 0.387916 | 0.54  | 0.313 | 3.90E-180 | Myeloid ce | NUCB1    |
| 1394 | RIOK3    | 4.56E-184 | 0.317801 | 0.348 | 0.166 | 8.56E-180 | Myeloid ce | RIOK3    |
| 1395 | TACC1    | 6.49E-184 | 0.298323 | 0.243 | 0.099 | 1.22E-179 | Myeloid ce | TACC1    |
| 1396 | PARP14   | 7.25E-183 | 0.329833 | 0.236 | 0.095 | 1.36E-178 | Myeloid ce | PARP14   |
| 1397 | CSNK1G2  | 7.82E-183 | 0.258499 | 0.17  | 0.057 | 1.47E-178 | Myeloid ce | CSNK1G2  |
| 1398 | SP1      | 1.30E-182 | 0.257287 | 0.159 | 0.052 | 2.45E-178 | Myeloid ce | SP1      |
| 1399 | ATP6V0E2 | 1.79E-182 | -0.62522 | 0.059 | 0.227 | 3.36E-178 | Myeloid ce | ATP6V0E2 |
| 1400 | SBNO2    | 2.38E-182 | 0.260874 | 0.128 | 0.037 | 4.47E-178 | Myeloid ce | SBNO2    |
| 1401 | PPP1CB   | 3.30E-182 | 0.340558 | 0.306 | 0.139 | 6.19E-178 | Myeloid ce | PPP1CB   |
| 1402 | WDR83OS  | 3.59E-181 | 0.399198 | 0.771 | 0.577 | 6.75E-177 | Myeloid ce | WDR83OS  |
| 1403 | NDUFB7   | 1.14E-180 | 0.392662 | 0.672 | 0.43  | 2.14E-176 | Myeloid ce | NDUFB7   |
| 1404 | IRF7     | 3.45E-180 | 0.714155 | 0.499 | 0.287 | 6.48E-176 | Myeloid ce | IRF7     |
| 1405 | PKN1     | 4.58E-180 | 0.330466 | 0.341 | 0.162 | 8.60E-176 | Myeloid ce | PKN1     |
| 1406 | BNIP3L   | 6.41E-179 | 0.383295 | 0.506 | 0.287 | 1.20E-174 | Myeloid ce | BNIP3L   |
| 1407 | RTL8C    | 1.05E-178 | 0.254203 | 0.258 | 0.107 | 1.97E-174 | Myeloid ce | RTL8C    |
| 1408 | UBB      | 1.21E-178 | -0.51902 | 0.73  | 0.815 | 2.27E-174 | Myeloid ce | UBB      |
| 1409 | GLMP     | 3.17E-178 | 0.251361 | 0.206 | 0.078 | 5.96E-174 | Myeloid ce | GLMP     |

|      |           |           |          |       |       |           |                      |
|------|-----------|-----------|----------|-------|-------|-----------|----------------------|
| 1410 | HSPE1     | 4.05E-178 | -0.62954 | 0.366 | 0.512 | 7.61E-174 | Myeloid ce HSPE1     |
| 1411 | SSH2      | 1.32E-177 | 0.398499 | 0.458 | 0.248 | 2.47E-173 | Myeloid ce SSH2      |
| 1412 | PIM3      | 4.35E-177 | 0.381483 | 0.331 | 0.159 | 8.17E-173 | Myeloid ce PIM3      |
| 1413 | LSP1      | 1.64E-176 | 0.436174 | 0.907 | 0.806 | 3.09E-172 | Myeloid ce LSP1      |
| 1414 | CDC42     | 2.19E-176 | 0.395929 | 0.823 | 0.636 | 4.12E-172 | Myeloid ce CDC42     |
| 1415 | LINC02273 | 2.80E-176 | -0.55131 | 0.015 | 0.165 | 5.26E-172 | Myeloid ce LINC02273 |
| 1416 | OGFR      | 2.82E-176 | 0.325449 | 0.334 | 0.158 | 5.30E-172 | Myeloid ce OGFR      |
| 1417 | GSR       | 1.38E-175 | 0.251596 | 0.152 | 0.05  | 2.59E-171 | Myeloid ce GSR       |
| 1418 | SYPL1     | 4.01E-175 | -0.8035  | 0.226 | 0.383 | 7.53E-171 | Myeloid ce SYPL1     |
| 1419 | IKZF3     | 9.19E-175 | -0.59967 | 0.023 | 0.175 | 1.73E-170 | Myeloid ce IKZF3     |
| 1420 | C11orf21  | 2.96E-174 | 0.267001 | 0.257 | 0.108 | 5.55E-170 | Myeloid ce C11orf21  |
| 1421 | ABHD14B   | 8.17E-174 | -0.66512 | 0.192 | 0.358 | 1.54E-169 | Myeloid ce ABHD14B   |
| 1422 | CHI3L2    | 9.80E-174 | -0.6355  | 0.021 | 0.173 | 1.84E-169 | Myeloid ce CHI3L2    |
| 1423 | RAB5C     | 2.29E-173 | 0.284663 | 0.321 | 0.15  | 4.30E-169 | Myeloid ce RAB5C     |
| 1424 | FAM96A    | 2.85E-173 | 0.356289 | 0.556 | 0.327 | 5.36E-169 | Myeloid ce FAM96A    |
| 1425 | TRIP12    | 1.01E-172 | 0.285827 | 0.237 | 0.098 | 1.90E-168 | Myeloid ce TRIP12    |
| 1426 | MPC1      | 1.74E-172 | 0.275102 | 0.351 | 0.168 | 3.26E-168 | Myeloid ce MPC1      |
| 1427 | SCNM1     | 3.49E-172 | 0.32341  | 0.396 | 0.203 | 6.56E-168 | Myeloid ce SCNM1     |
| 1428 | DRAP1     | 4.58E-172 | 0.497439 | 0.71  | 0.518 | 8.60E-168 | Myeloid ce DRAP1     |
| 1429 | AKR1A1    | 1.63E-170 | 0.363981 | 0.481 | 0.269 | 3.07E-166 | Myeloid ce AKR1A1    |
| 1430 | APRT      | 4.87E-170 | -0.48646 | 0.68  | 0.756 | 9.15E-166 | Myeloid ce APRT      |
| 1431 | NORAD     | 7.17E-170 | 0.304925 | 0.296 | 0.136 | 1.35E-165 | Myeloid ce NORAD     |
| 1432 | H2AFZ     | 8.29E-170 | 0.402773 | 0.707 | 0.501 | 1.56E-165 | Myeloid ce H2AFZ     |
| 1433 | RPS2      | 1.08E-169 | -0.56114 | 0.826 | 0.859 | 2.04E-165 | Myeloid ce RPS2      |
| 1434 | TM9SF2    | 1.24E-169 | 0.34707  | 0.416 | 0.22  | 2.33E-165 | Myeloid ce TM9SF2    |
| 1435 | PHPT1     | 1.43E-169 | 0.329548 | 0.448 | 0.241 | 2.69E-165 | Myeloid ce PHPT1     |
| 1436 | FCER2     | 1.49E-169 | -1.03313 | 0.031 | 0.183 | 2.80E-165 | Myeloid ce FCER2     |
| 1437 | SUSD3     | 3.18E-169 | -0.63236 | 0.084 | 0.25  | 5.98E-165 | Myeloid ce SUSD3     |
| 1438 | LARP1     | 3.53E-169 | 0.253442 | 0.194 | 0.073 | 6.63E-165 | Myeloid ce LARP1     |
| 1439 | CTDSP1    | 4.48E-169 | 0.296296 | 0.334 | 0.159 | 8.41E-165 | Myeloid ce CTDSP1    |
| 1440 | POLR2L    | 5.41E-169 | 0.423092 | 0.732 | 0.513 | 1.02E-164 | Myeloid ce POLR2L    |
| 1441 | MTMR14    | 5.65E-169 | 0.310366 | 0.412 | 0.213 | 1.06E-164 | Myeloid ce MTMR14    |
| 1442 | OPTN      | 1.12E-168 | -0.59213 | 0.043 | 0.2   | 2.10E-164 | Myeloid ce OPTN      |
| 1443 | CUTA      | 1.58E-168 | -0.58984 | 0.517 | 0.6   | 2.97E-164 | Myeloid ce CUTA      |
| 1444 | HMGB1     | 2.26E-168 | -0.47965 | 0.783 | 0.818 | 4.25E-164 | Myeloid ce HMGB1     |
| 1445 | NDUFA2    | 4.08E-168 | 0.399701 | 0.642 | 0.407 | 7.67E-164 | Myeloid ce NDUFA2    |
| 1446 | RAB1A     | 1.51E-167 | 0.267548 | 0.266 | 0.117 | 2.84E-163 | Myeloid ce RAB1A     |
| 1447 | APOL6     | 2.68E-167 | 0.265118 | 0.21  | 0.083 | 5.03E-163 | Myeloid ce APOL6     |
| 1448 | CTDNBP1   | 2.87E-167 | 0.284858 | 0.208 | 0.083 | 5.40E-163 | Myeloid ce CTDNBP1   |
| 1449 | NMI       | 5.92E-167 | 0.329113 | 0.394 | 0.204 | 1.11E-162 | Myeloid ce NMI       |
| 1450 | CAB39     | 7.02E-167 | 0.261034 | 0.174 | 0.063 | 1.32E-162 | Myeloid ce CAB39     |
| 1451 | C6orf62   | 8.27E-167 | 0.291128 | 0.237 | 0.1   | 1.55E-162 | Myeloid ce C6orf62   |
| 1452 | ATIC      | 1.17E-166 | -0.60469 | 0.106 | 0.27  | 2.20E-162 | Myeloid ce ATIC      |
| 1453 | RALGPS2   | 4.36E-166 | -0.91282 | 0.068 | 0.229 | 8.18E-162 | Myeloid ce RALGPS2   |
| 1454 | CCT2      | 5.51E-166 | -0.62645 | 0.256 | 0.408 | 1.03E-161 | Myeloid ce CCT2      |
| 1455 | CD74      | 6.98E-166 | -0.59518 | 0.922 | 0.797 | 1.31E-161 | Myeloid ce CD74      |
| 1456 | GZMA      | 8.10E-166 | -1.49154 | 0.012 | 0.153 | 1.52E-161 | Myeloid ce GZMA      |

|      |           |           |          |       |       |           |                      |
|------|-----------|-----------|----------|-------|-------|-----------|----------------------|
| 1457 | MRPL23    | 3.81E-165 | 0.294932 | 0.296 | 0.138 | 7.15E-161 | Myeloid ce MRPL23    |
| 1458 | MCUB      | 3.93E-164 | -0.64466 | 0.412 | 0.528 | 7.38E-160 | Myeloid ce MCUB      |
| 1459 | GMIP      | 4.45E-164 | 0.27765  | 0.285 | 0.13  | 8.35E-160 | Myeloid ce GMIP      |
| 1460 | SH2D2A    | 4.80E-164 | -0.68714 | 0.014 | 0.155 | 9.02E-160 | Myeloid ce SH2D2A    |
| 1461 | CDV3      | 6.38E-164 | 0.281135 | 0.239 | 0.102 | 1.20E-159 | Myeloid ce CDV3      |
| 1462 | SYNE2     | 8.73E-164 | -0.60218 | 0.039 | 0.193 | 1.64E-159 | Myeloid ce SYNE2     |
| 1463 | RPS10     | 1.07E-163 | -0.61077 | 0.594 | 0.678 | 2.00E-159 | Myeloid ce RPS10     |
| 1464 | COX6A1    | 1.13E-163 | 0.349698 | 0.871 | 0.757 | 2.12E-159 | Myeloid ce COX6A1    |
| 1465 | TESPA1    | 1.76E-162 | -0.53601 | 0.026 | 0.171 | 3.31E-158 | Myeloid ce TESPA1    |
| 1466 | PPP3CC    | 6.37E-162 | -0.63057 | 0.094 | 0.255 | 1.20E-157 | Myeloid ce PPP3CC    |
| 1467 | EIF4B     | 1.11E-161 | -0.59471 | 0.486 | 0.588 | 2.09E-157 | Myeloid ce EIF4B     |
| 1468 | CHMP5     | 1.97E-161 | 0.296805 | 0.398 | 0.207 | 3.69E-157 | Myeloid ce CHMP5     |
| 1469 | AZI2      | 6.95E-161 | 0.258312 | 0.226 | 0.094 | 1.30E-156 | Myeloid ce AZI2      |
| 1470 | MGAT4A    | 8.12E-161 | -0.63645 | 0.108 | 0.273 | 1.53E-156 | Myeloid ce MGAT4A    |
| 1471 | TLE4      | 1.10E-160 | 0.257477 | 0.208 | 0.084 | 2.06E-156 | Myeloid ce TLE4      |
| 1472 | BAZ1A     | 4.79E-160 | 0.377789 | 0.422 | 0.229 | 9.00E-156 | Myeloid ce BAZ1A     |
| 1473 | LINC01550 | 1.04E-159 | -0.52926 | 0.017 | 0.156 | 1.96E-155 | Myeloid ce LINC01550 |
| 1474 | PSMA4     | 1.16E-159 | 0.364889 | 0.519 | 0.307 | 2.18E-155 | Myeloid ce PSMA4     |
| 1475 | CCT7      | 1.49E-159 | -0.60694 | 0.349 | 0.478 | 2.79E-155 | Myeloid ce CCT7      |
| 1476 | COA3      | 9.29E-159 | 0.287558 | 0.43  | 0.23  | 1.75E-154 | Myeloid ce COA3      |
| 1477 | ADH5      | 1.90E-158 | -0.61647 | 0.205 | 0.359 | 3.58E-154 | Myeloid ce ADH5      |
| 1478 | PHF21A    | 1.95E-158 | 0.26249  | 0.182 | 0.069 | 3.66E-154 | Myeloid ce PHF21A    |
| 1479 | TUBB      | 2.79E-157 | -0.58168 | 0.458 | 0.597 | 5.24E-153 | Myeloid ce TUBB      |
| 1480 | OTULINL   | 3.61E-157 | 0.259733 | 0.232 | 0.098 | 6.78E-153 | Myeloid ce OTULINL   |
| 1481 | PSMB6     | 4.22E-157 | 0.375114 | 0.661 | 0.442 | 7.93E-153 | Myeloid ce PSMB6     |
| 1482 | SKP1      | 1.03E-156 | -0.42789 | 0.744 | 0.808 | 1.94E-152 | Myeloid ce SKP1      |
| 1483 | FKBP11    | 1.34E-156 | -0.63356 | 0.044 | 0.192 | 2.51E-152 | Myeloid ce FKBP11    |
| 1484 | GLTP      | 2.12E-156 | 0.256169 | 0.289 | 0.134 | 3.99E-152 | Myeloid ce GLTP      |
| 1485 | ATP5MC2   | 2.37E-156 | 0.315597 | 0.938 | 0.945 | 4.45E-152 | Myeloid ce ATP5MC2   |
| 1486 | KMT2C     | 3.61E-156 | 0.305474 | 0.285 | 0.134 | 6.78E-152 | Myeloid ce KMT2C     |
| 1487 | TPD52L2   | 3.74E-156 | 0.291403 | 0.275 | 0.127 | 7.03E-152 | Myeloid ce TPD52L2   |
| 1488 | MAP4K4    | 1.53E-155 | 0.267149 | 0.185 | 0.072 | 2.87E-151 | Myeloid ce MAP4K4    |
| 1489 | HIF1A     | 7.18E-155 | 0.40928  | 0.405 | 0.221 | 1.35E-150 | Myeloid ce HIF1A     |
| 1490 | ADAR      | 6.46E-154 | 0.374605 | 0.419 | 0.231 | 1.21E-149 | Myeloid ce ADAR      |
| 1491 | RCAN3     | 1.22E-153 | -0.61492 | 0.08  | 0.234 | 2.30E-149 | Myeloid ce RCAN3     |
| 1492 | NEDD8     | 2.11E-153 | 0.349829 | 0.703 | 0.47  | 3.97E-149 | Myeloid ce NEDD8     |
| 1493 | PET100    | 3.27E-153 | 0.400201 | 0.66  | 0.437 | 6.14E-149 | Myeloid ce PET100    |
| 1494 | SF1       | 5.75E-153 | -0.56749 | 0.511 | 0.601 | 1.08E-148 | Myeloid ce SF1       |
| 1495 | DCK       | 7.72E-153 | -0.64521 | 0.181 | 0.334 | 1.45E-148 | Myeloid ce DCK       |
| 1496 | BLK       | 9.92E-153 | -0.6632  | 0.018 | 0.152 | 1.86E-148 | Myeloid ce BLK       |
| 1497 | IMP3      | 2.27E-152 | -0.59221 | 0.371 | 0.49  | 4.26E-148 | Myeloid ce IMP3      |
| 1498 | SELENOS   | 6.40E-152 | 0.2788   | 0.324 | 0.158 | 1.20E-147 | Myeloid ce SELENOS   |
| 1499 | EPB41     | 7.36E-152 | -0.62062 | 0.147 | 0.308 | 1.38E-147 | Myeloid ce EPB41     |
| 1500 | TRAPPC1   | 2.12E-151 | 0.35859  | 0.788 | 0.587 | 3.99E-147 | Myeloid ce TRAPPC1   |
| 1501 | HDAC1     | 5.26E-151 | -0.62694 | 0.315 | 0.443 | 9.87E-147 | Myeloid ce HDAC1     |
| 1502 | CBR1      | 9.17E-151 | 0.251348 | 0.313 | 0.152 | 1.72E-146 | Myeloid ce CBR1      |
| 1503 | AURKAIP1  | 1.00E-150 | 0.345448 | 0.632 | 0.397 | 1.89E-146 | Myeloid ce AURKAIP1  |

|      |           |           |          |       |       |           |                      |
|------|-----------|-----------|----------|-------|-------|-----------|----------------------|
| 1504 | THEM4     | 3.34E-150 | -0.51921 | 0.04  | 0.183 | 6.27E-146 | Myeloid ce THEM4     |
| 1505 | DIAPH1    | 4.78E-149 | 0.259763 | 0.282 | 0.132 | 8.98E-145 | Myeloid ce DIAPH1    |
| 1506 | CTBS      | 8.78E-149 | 0.282219 | 0.296 | 0.143 | 1.65E-144 | Myeloid ce CTBS      |
| 1507 | EIF3H     | 1.04E-148 | -0.45917 | 0.712 | 0.759 | 1.95E-144 | Myeloid ce EIF3H     |
| 1508 | SMS       | 1.04E-148 | 0.255627 | 0.324 | 0.159 | 1.95E-144 | Myeloid ce SMS       |
| 1509 | SH2D1A    | 1.10E-148 | -0.50477 | 0.015 | 0.145 | 2.06E-144 | Myeloid ce SH2D1A    |
| 1510 | MOB3A     | 3.17E-148 | 0.271275 | 0.313 | 0.152 | 5.95E-144 | Myeloid ce MOB3A     |
| 1511 | PSMB4     | 9.09E-148 | 0.287045 | 0.314 | 0.156 | 1.71E-143 | Myeloid ce PSMB4     |
| 1512 | RABGAP1L  | 2.44E-147 | 0.344504 | 0.303 | 0.151 | 4.59E-143 | Myeloid ce RABGAP1L  |
| 1513 | TWF2      | 2.48E-146 | 0.371589 | 0.622 | 0.411 | 4.66E-142 | Myeloid ce TWF2      |
| 1514 | SLC38A10  | 3.67E-146 | 0.262522 | 0.252 | 0.115 | 6.89E-142 | Myeloid ce SLC38A10  |
| 1515 | FAM129C   | 2.33E-145 | -0.81413 | 0.047 | 0.191 | 4.39E-141 | Myeloid ce FAM129C   |
| 1516 | GNAS      | 3.75E-145 | 0.333408 | 0.534 | 0.322 | 7.04E-141 | Myeloid ce GNAS      |
| 1517 | NDUFS7    | 5.24E-145 | 0.357379 | 0.651 | 0.439 | 9.84E-141 | Myeloid ce NDUFS7    |
| 1518 | BUD31     | 5.52E-145 | 0.291083 | 0.473 | 0.268 | 1.04E-140 | Myeloid ce BUD31     |
| 1519 | MTSS1     | 1.30E-144 | 0.331896 | 0.278 | 0.133 | 2.45E-140 | Myeloid ce MTSS1     |
| 1520 | RPS6KA1   | 2.72E-144 | 0.280328 | 0.403 | 0.217 | 5.12E-140 | Myeloid ce RPS6KA1   |
| 1521 | PTRHD1    | 5.77E-144 | 0.327831 | 0.428 | 0.241 | 1.08E-139 | Myeloid ce PTRHD1    |
| 1522 | MRPL41    | 6.05E-144 | 0.316534 | 0.557 | 0.339 | 1.14E-139 | Myeloid ce MRPL41    |
| 1523 | THEMIS    | 8.27E-144 | -0.46597 | 0.014 | 0.14  | 1.55E-139 | Myeloid ce THEMIS    |
| 1524 | SYNGR2    | 1.98E-143 | 0.334145 | 0.692 | 0.492 | 3.72E-139 | Myeloid ce SYNGR2    |
| 1525 | IL10RA    | 2.95E-143 | 0.266935 | 0.431 | 0.236 | 5.54E-139 | Myeloid ce IL10RA    |
| 1526 | LINC02446 | 1.00E-142 | -1.07283 | 0.019 | 0.147 | 1.89E-138 | Myeloid ce LINC02446 |
| 1527 | CD72      | 1.12E-142 | -0.86505 | 0.037 | 0.171 | 2.11E-138 | Myeloid ce CD72      |
| 1528 | COPA      | 1.89E-142 | 0.266066 | 0.282 | 0.136 | 3.55E-138 | Myeloid ce COPA      |
| 1529 | MVP       | 3.97E-142 | 0.311716 | 0.495 | 0.293 | 7.45E-138 | Myeloid ce MVP       |
| 1530 | RNF213    | 9.37E-142 | 0.398503 | 0.586 | 0.373 | 1.76E-137 | Myeloid ce RNF213    |
| 1531 | BCAS4     | 1.70E-141 | -0.49054 | 0.021 | 0.149 | 3.19E-137 | Myeloid ce BCAS4     |
| 1532 | BOD1L1    | 1.91E-141 | 0.286188 | 0.216 | 0.094 | 3.58E-137 | Myeloid ce BOD1L1    |
| 1533 | MINOS1    | 1.93E-141 | 0.343696 | 0.581 | 0.365 | 3.63E-137 | Myeloid ce MINOS1    |
| 1534 | ANAPC15   | 4.44E-141 | 0.297017 | 0.333 | 0.172 | 8.34E-137 | Myeloid ce ANAPC15   |
| 1535 | INPP4B    | 6.04E-141 | -0.49587 | 0.019 | 0.145 | 1.13E-136 | Myeloid ce INPP4B    |
| 1536 | EPSTI1    | 6.19E-141 | 0.286959 | 0.258 | 0.121 | 1.16E-136 | Myeloid ce EPSTI1    |
| 1537 | EIF4EBP2  | 6.39E-141 | 0.268909 | 0.293 | 0.143 | 1.20E-136 | Myeloid ce EIF4EBP2  |
| 1538 | UBASH3A   | 7.85E-141 | -0.44085 | 0.014 | 0.138 | 1.47E-136 | Myeloid ce UBASH3A   |
| 1539 | FAM102A   | 1.31E-140 | -0.47028 | 0.022 | 0.15  | 2.45E-136 | Myeloid ce FAM102A   |
| 1540 | LRRN3     | 1.53E-140 | -0.57392 | 0.015 | 0.139 | 2.87E-136 | Myeloid ce LRRN3     |
| 1541 | RSL1D1    | 3.23E-140 | -0.56359 | 0.475 | 0.565 | 6.06E-136 | Myeloid ce RSL1D1    |
| 1542 | DDX24     | 8.02E-140 | -0.59592 | 0.325 | 0.456 | 1.51E-135 | Myeloid ce DDX24     |
| 1543 | RHOF      | 1.03E-139 | -0.61895 | 0.184 | 0.329 | 1.93E-135 | Myeloid ce RHOF      |
| 1544 | CCDC69    | 2.66E-139 | 0.282806 | 0.34  | 0.177 | 5.00E-135 | Myeloid ce CCDC69    |
| 1545 | NPTN      | 4.25E-139 | 0.259744 | 0.349 | 0.181 | 7.98E-135 | Myeloid ce NPTN      |
| 1546 | PTPN6     | 6.79E-139 | 0.298866 | 0.783 | 0.582 | 1.28E-134 | Myeloid ce PTPN6     |
| 1547 | C12orf75  | 7.64E-139 | -0.54967 | 0.069 | 0.218 | 1.44E-134 | Myeloid ce C12orf75  |
| 1548 | DNM2      | 7.98E-139 | 0.261401 | 0.217 | 0.096 | 1.50E-134 | Myeloid ce DNM2      |
| 1549 | HCFC1R1   | 1.37E-138 | 0.279842 | 0.345 | 0.181 | 2.57E-134 | Myeloid ce HCFC1R1   |
| 1550 | SFXN1     | 1.46E-138 | -0.47858 | 0.044 | 0.179 | 2.74E-134 | Myeloid ce SFXN1     |

|      |            |           |          |       |       |           |                       |
|------|------------|-----------|----------|-------|-------|-----------|-----------------------|
| 1551 | ZNF428     | 2.97E-138 | -0.58652 | 0.196 | 0.343 | 5.58E-134 | Myeloid ce ZNF428     |
| 1552 | EIF4A1     | 3.23E-138 | 0.302289 | 0.359 | 0.193 | 6.07E-134 | Myeloid ce EIF4A1     |
| 1553 | MRFAP1L1   | 3.76E-138 | -0.58855 | 0.152 | 0.298 | 7.07E-134 | Myeloid ce MRFAP1L1   |
| 1554 | VPS35      | 5.32E-138 | 0.313326 | 0.457 | 0.265 | 1.00E-133 | Myeloid ce VPS35      |
| 1555 | AC008555.5 | 7.61E-138 | -0.44965 | 0.017 | 0.14  | 1.43E-133 | Myeloid ce AC008555.5 |
| 1556 | TRIB2      | 7.80E-138 | -0.45647 | 0.019 | 0.144 | 1.46E-133 | Myeloid ce TRIB2      |
| 1557 | ROCK1      | 1.53E-137 | 0.318759 | 0.403 | 0.225 | 2.87E-133 | Myeloid ce ROCK1      |
| 1558 | SRP9       | 2.14E-136 | -0.51754 | 0.517 | 0.598 | 4.01E-132 | Myeloid ce SRP9       |
| 1559 | EIF3D      | 1.17E-135 | -0.53282 | 0.482 | 0.569 | 2.20E-131 | Myeloid ce EIF3D      |
| 1560 | PELI1      | 1.43E-135 | 0.300931 | 0.182 | 0.076 | 2.69E-131 | Myeloid ce PELI1      |
| 1561 | CDCA7L     | 6.00E-135 | -0.56137 | 0.045 | 0.178 | 1.13E-130 | Myeloid ce CDCA7L     |
| 1562 | RNF7       | 1.11E-134 | 0.331789 | 0.598 | 0.386 | 2.08E-130 | Myeloid ce RNF7       |
| 1563 | PAG1       | 1.11E-134 | 0.279507 | 0.238 | 0.11  | 2.08E-130 | Myeloid ce PAG1       |
| 1564 | MATK       | 1.15E-134 | -0.58847 | 0.012 | 0.13  | 2.16E-130 | Myeloid ce MATK       |
| 1565 | KLRB1      | 1.33E-134 | -1.21219 | 0.014 | 0.133 | 2.51E-130 | Myeloid ce KLRB1      |
| 1566 | CD320      | 1.84E-134 | -0.44503 | 0.023 | 0.147 | 3.45E-130 | Myeloid ce CD320      |
| 1567 | NELL2      | 9.90E-134 | -0.49731 | 0.012 | 0.13  | 1.86E-129 | Myeloid ce NELL2      |
| 1568 | SLC25A38   | 1.12E-133 | -0.48392 | 0.049 | 0.183 | 2.10E-129 | Myeloid ce SLC25A38   |
| 1569 | HNRNPA2B1  | 2.17E-133 | -0.36321 | 0.856 | 0.886 | 4.08E-129 | Myeloid ce HNRNPA2B1  |
| 1570 | STAT4      | 2.19E-133 | -0.47342 | 0.015 | 0.133 | 4.12E-129 | Myeloid ce STAT4      |
| 1571 | AC119396.1 | 3.87E-133 | -0.60807 | 0.132 | 0.275 | 7.27E-129 | Myeloid ce AC119396.1 |
| 1572 | NCR3       | 5.98E-133 | -0.54721 | 0.013 | 0.131 | 1.12E-128 | Myeloid ce NCR3       |
| 1573 | GBP1       | 6.84E-133 | 0.356401 | 0.242 | 0.114 | 1.29E-128 | Myeloid ce GBP1       |
| 1574 | TIMM17B    | 9.68E-133 | 0.285809 | 0.456 | 0.261 | 1.82E-128 | Myeloid ce TIMM17B    |
| 1575 | NDUFC2     | 1.35E-132 | 0.262422 | 0.359 | 0.191 | 2.54E-128 | Myeloid ce NDUFC2     |
| 1576 | HSD17B11   | 1.60E-132 | 0.314586 | 0.523 | 0.318 | 3.01E-128 | Myeloid ce HSD17B11   |
| 1577 | PNRC1      | 1.97E-132 | -0.59331 | 0.528 | 0.608 | 3.71E-128 | Myeloid ce PNRC1      |
| 1578 | SH3BGRL    | 4.67E-132 | 0.39114  | 0.701 | 0.536 | 8.77E-128 | Myeloid ce SH3BGRL    |
| 1579 | APBB1      | 2.00E-131 | -0.45167 | 0.02  | 0.141 | 3.75E-127 | Myeloid ce APBB1      |
| 1580 | CALR       | 2.69E-131 | -0.61326 | 0.515 | 0.615 | 5.06E-127 | Myeloid ce CALR       |
| 1581 | THOC3      | 3.39E-131 | -0.58268 | 0.139 | 0.279 | 6.37E-127 | Myeloid ce THOC3      |
| 1582 | NRDC       | 6.14E-131 | 0.288693 | 0.351 | 0.189 | 1.15E-126 | Myeloid ce NRDC       |
| 1583 | ORMDL3     | 9.81E-131 | -0.47227 | 0.039 | 0.167 | 1.84E-126 | Myeloid ce ORMDL3     |
| 1584 | C12orf65   | 1.03E-130 | -0.50496 | 0.064 | 0.198 | 1.93E-126 | Myeloid ce C12orf65   |
| 1585 | RCN2       | 1.15E-130 | -0.57816 | 0.153 | 0.292 | 2.16E-126 | Myeloid ce RCN2       |
| 1586 | BNIP2      | 1.19E-130 | 0.308965 | 0.463 | 0.272 | 2.23E-126 | Myeloid ce BNIP2      |
| 1587 | FYB1       | 1.35E-130 | 0.272867 | 0.818 | 0.539 | 2.54E-126 | Myeloid ce FYB1       |
| 1588 | MIEN1      | 2.46E-130 | 0.270743 | 0.553 | 0.337 | 4.61E-126 | Myeloid ce MIEN1      |
| 1589 | TOP1       | 8.72E-130 | 0.26442  | 0.365 | 0.197 | 1.64E-125 | Myeloid ce TOP1       |
| 1590 | IGHV5-78   | 4.86E-129 | -0.65525 | 0.016 | 0.132 | 9.13E-125 | Myeloid ce IGHV5-78   |
| 1591 | C4orf3     | 6.28E-129 | 0.401716 | 0.754 | 0.552 | 1.18E-124 | Myeloid ce C4orf3     |
| 1592 | CD40LG     | 1.04E-128 | -0.50603 | 0.012 | 0.125 | 1.95E-124 | Myeloid ce CD40LG     |
| 1593 | CD79B      | 3.80E-128 | -1.25171 | 0.196 | 0.324 | 7.15E-124 | Myeloid ce CD79B      |
| 1594 | TRAF5      | 4.65E-128 | -0.47627 | 0.031 | 0.154 | 8.74E-124 | Myeloid ce TRAF5      |
| 1595 | GATA3      | 1.52E-127 | -0.43361 | 0.013 | 0.127 | 2.86E-123 | Myeloid ce GATA3      |
| 1596 | LAMTOR5    | 1.88E-127 | 0.314052 | 0.582 | 0.372 | 3.54E-123 | Myeloid ce LAMTOR5    |
| 1597 | CCND2      | 3.33E-127 | -0.47925 | 0.032 | 0.156 | 6.26E-123 | Myeloid ce CCND2      |

|      |          |           |          |       |       |           |                     |
|------|----------|-----------|----------|-------|-------|-----------|---------------------|
| 1598 | DDX3X    | 1.77E-126 | 0.263822 | 0.304 | 0.157 | 3.32E-122 | Myeloid ce DDX3X    |
| 1599 | TMEM154  | 1.91E-126 | 0.272803 | 0.28  | 0.14  | 3.59E-122 | Myeloid ce TMEM154  |
| 1600 | PPP4C    | 5.03E-126 | 0.316331 | 0.611 | 0.399 | 9.45E-122 | Myeloid ce PPP4C    |
| 1601 | ARID5B   | 5.53E-126 | -0.62287 | 0.105 | 0.243 | 1.04E-121 | Myeloid ce ARID5B   |
| 1602 | PLPP5    | 1.06E-125 | -0.89009 | 0.093 | 0.228 | 1.99E-121 | Myeloid ce PLPP5    |
| 1603 | CAMTA1   | 1.52E-125 | 0.259791 | 0.322 | 0.17  | 2.86E-121 | Myeloid ce CAMTA1   |
| 1604 | TNFRSF25 | 3.60E-125 | -0.43707 | 0.021 | 0.137 | 6.76E-121 | Myeloid ce TNFRSF25 |
| 1605 | BEX4     | 7.61E-125 | -0.54948 | 0.122 | 0.258 | 1.43E-120 | Myeloid ce BEX4     |
| 1606 | MKNK2    | 1.06E-124 | 0.282778 | 0.252 | 0.124 | 1.99E-120 | Myeloid ce MKNK2    |
| 1607 | UQCR10   | 2.67E-124 | 0.324204 | 0.84  | 0.709 | 5.02E-120 | Myeloid ce UQCR10   |
| 1608 | PLD3     | 4.57E-124 | 0.298957 | 0.351 | 0.193 | 8.59E-120 | Myeloid ce PLD3     |
| 1609 | BEX2     | 5.12E-124 | -0.41589 | 0.016 | 0.129 | 9.62E-120 | Myeloid ce BEX2     |
| 1610 | HOPX     | 6.51E-124 | -0.96901 | 0.013 | 0.123 | 1.22E-119 | Myeloid ce HOPX     |
| 1611 | XPO6     | 7.03E-124 | 0.276526 | 0.16  | 0.065 | 1.32E-119 | Myeloid ce XPO6     |
| 1612 | TMEM179B | 1.63E-123 | 0.282266 | 0.549 | 0.341 | 3.06E-119 | Myeloid ce TMEM179B |
| 1613 | DBNL     | 3.32E-123 | 0.302994 | 0.564 | 0.359 | 6.23E-119 | Myeloid ce DBNL     |
| 1614 | TPD52    | 4.28E-123 | -0.46713 | 0.017 | 0.129 | 8.05E-119 | Myeloid ce TPD52    |
| 1615 | MRPL52   | 4.80E-123 | 0.30581  | 0.601 | 0.386 | 9.01E-119 | Myeloid ce MRPL52   |
| 1616 | VAMP2    | 6.89E-123 | -0.5828  | 0.292 | 0.418 | 1.30E-118 | Myeloid ce VAMP2    |
| 1617 | GIMAP5   | 1.29E-122 | -0.50959 | 0.046 | 0.169 | 2.42E-118 | Myeloid ce GIMAP5   |
| 1618 | ZNF22    | 1.46E-122 | -0.55984 | 0.164 | 0.299 | 2.75E-118 | Myeloid ce ZNF22    |
| 1619 | NSA2     | 1.51E-122 | -0.55219 | 0.438 | 0.534 | 2.83E-118 | Myeloid ce NSA2     |
| 1620 | OSTF1    | 2.86E-122 | 0.29843  | 0.637 | 0.435 | 5.37E-118 | Myeloid ce OSTF1    |
| 1621 | P2RY8    | 3.68E-122 | -0.52925 | 0.084 | 0.218 | 6.91E-118 | Myeloid ce P2RY8    |
| 1622 | RBMS1    | 6.96E-122 | 0.267284 | 0.314 | 0.165 | 1.31E-117 | Myeloid ce RBMS1    |
| 1623 | ARHGAP3C | 1.00E-121 | 0.291614 | 0.483 | 0.292 | 1.88E-117 | Myeloid ce ARHGAP3C |
| 1624 | DYNC1H1  | 1.32E-121 | 0.252242 | 0.317 | 0.167 | 2.49E-117 | Myeloid ce DYNC1H1  |
| 1625 | RPA2     | 1.09E-120 | -0.56741 | 0.179 | 0.31  | 2.04E-116 | Myeloid ce RPA2     |
| 1626 | SRI      | 1.44E-120 | 0.341417 | 0.552 | 0.364 | 2.70E-116 | Myeloid ce SRI      |
| 1627 | P2RY10   | 2.19E-120 | -0.43099 | 0.017 | 0.127 | 4.12E-116 | Myeloid ce P2RY10   |
| 1628 | PDLIM1   | 4.11E-120 | -0.69528 | 0.07  | 0.198 | 7.72E-116 | Myeloid ce PDLIM1   |
| 1629 | IGSF8    | 4.41E-120 | -0.47505 | 0.063 | 0.19  | 8.28E-116 | Myeloid ce IGSF8    |
| 1630 | EPHX2    | 7.67E-120 | -0.41187 | 0.012 | 0.119 | 1.44E-115 | Myeloid ce EPHX2    |
| 1631 | PHB2     | 4.78E-119 | -0.50522 | 0.503 | 0.579 | 8.98E-115 | Myeloid ce PHB2     |
| 1632 | PPIA     | 1.80E-118 | -0.30078 | 0.889 | 0.957 | 3.38E-114 | Myeloid ce PPIA     |
| 1633 | CHMP7    | 2.91E-118 | -0.57065 | 0.122 | 0.254 | 5.47E-114 | Myeloid ce CHMP7    |
| 1634 | TMEM156  | 7.29E-118 | -0.42979 | 0.02  | 0.13  | 1.37E-113 | Myeloid ce TMEM156  |
| 1635 | SLFN5    | 7.70E-118 | -0.60221 | 0.138 | 0.272 | 1.45E-113 | Myeloid ce SLFN5    |
| 1636 | PARP1    | 2.68E-117 | -0.60136 | 0.237 | 0.359 | 5.04E-113 | Myeloid ce PARP1    |
| 1637 | CD24     | 8.28E-117 | -0.63552 | 0.021 | 0.13  | 1.56E-112 | Myeloid ce CD24     |
| 1638 | ATP5MG   | 8.91E-117 | 0.252637 | 0.955 | 0.915 | 1.67E-112 | Myeloid ce ATP5MG   |
| 1639 | FGFBP2   | 1.18E-116 | -1.42758 | 0.009 | 0.111 | 2.22E-112 | Myeloid ce FGFBP2   |
| 1640 | UBA2     | 3.16E-116 | -0.53972 | 0.207 | 0.332 | 5.93E-112 | Myeloid ce UBA2     |
| 1641 | APP      | 4.35E-116 | 0.285829 | 0.198 | 0.09  | 8.18E-112 | Myeloid ce APP      |
| 1642 | FCRL1    | 4.78E-116 | -0.56522 | 0.02  | 0.129 | 8.97E-112 | Myeloid ce FCRL1    |
| 1643 | PSME2    | 9.49E-116 | 0.510165 | 0.744 | 0.638 | 1.78E-111 | Myeloid ce PSME2    |
| 1644 | HLA-DOB  | 1.24E-115 | -0.59174 | 0.025 | 0.136 | 2.34E-111 | Myeloid ce HLA-DOB  |

|      |          |           |          |       |       |           |                     |
|------|----------|-----------|----------|-------|-------|-----------|---------------------|
| 1645 | KLRD1    | 1.48E-115 | -0.86194 | 0.008 | 0.109 | 2.79E-111 | Myeloid ce KLRD1    |
| 1646 | PPP1R2   | 5.09E-115 | -0.56542 | 0.325 | 0.433 | 9.55E-111 | Myeloid ce PPP1R2   |
| 1647 | DNAJC15  | 8.27E-115 | 0.276854 | 0.511 | 0.315 | 1.55E-110 | Myeloid ce DNAJC15  |
| 1648 | ATM      | 1.78E-114 | -0.58164 | 0.235 | 0.363 | 3.35E-110 | Myeloid ce ATM      |
| 1649 | MRPL33   | 2.41E-114 | 0.28588  | 0.508 | 0.32  | 4.53E-110 | Myeloid ce MRPL33   |
| 1650 | HSPD1    | 4.47E-114 | -0.57005 | 0.363 | 0.463 | 8.40E-110 | Myeloid ce HSPD1    |
| 1651 | SDR39U1  | 5.53E-114 | -0.55907 | 0.213 | 0.339 | 1.04E-109 | Myeloid ce SDR39U1  |
| 1652 | MZT2A    | 1.73E-113 | -0.53068 | 0.158 | 0.293 | 3.26E-109 | Myeloid ce MZT2A    |
| 1653 | GRAP2    | 2.73E-113 | -0.44519 | 0.039 | 0.156 | 5.13E-109 | Myeloid ce GRAP2    |
| 1654 | IGHD     | 3.13E-113 | -0.69977 | 0.03  | 0.141 | 5.88E-109 | Myeloid ce IGH      |
| 1655 | EIF3A    | 4.94E-113 | 0.279785 | 0.419 | 0.246 | 9.27E-109 | Myeloid ce EIF3A    |
| 1656 | FUS      | 7.51E-113 | -0.5258  | 0.442 | 0.529 | 1.41E-108 | Myeloid ce FUS      |
| 1657 | GZMH     | 2.22E-112 | -1.43858 | 0.011 | 0.111 | 4.17E-108 | Myeloid ce GZMH     |
| 1658 | PASK     | 4.19E-112 | -0.50046 | 0.023 | 0.131 | 7.88E-108 | Myeloid ce PASK     |
| 1659 | CYTIP    | 4.30E-112 | -0.5204  | 0.407 | 0.516 | 8.08E-108 | Myeloid ce CYTIP    |
| 1660 | ITGA6    | 8.23E-112 | -0.41087 | 0.023 | 0.131 | 1.55E-107 | Myeloid ce ITGA6    |
| 1661 | CYFIP2   | 9.64E-112 | -0.54607 | 0.215 | 0.342 | 1.81E-107 | Myeloid ce CYFIP2   |
| 1662 | RPL38    | 1.40E-110 | -0.3963  | 0.792 | 0.817 | 2.64E-106 | Myeloid ce RPL38    |
| 1663 | ISG15    | 2.33E-110 | 0.478403 | 0.438 | 0.276 | 4.37E-106 | Myeloid ce ISG15    |
| 1664 | CD28     | 3.27E-110 | -0.38123 | 0.015 | 0.117 | 6.14E-106 | Myeloid ce CD28     |
| 1665 | UXT      | 1.13E-109 | -0.44486 | 0.628 | 0.661 | 2.12E-105 | Myeloid ce UXT      |
| 1666 | SLAMF6   | 1.68E-109 | -0.37677 | 0.011 | 0.109 | 3.15E-105 | Myeloid ce SLAMF6   |
| 1667 | PRKCQ    | 3.23E-109 | -0.35959 | 0.012 | 0.112 | 6.06E-105 | Myeloid ce PRKCQ    |
| 1668 | AKR1B1   | 3.62E-109 | -0.49721 | 0.124 | 0.251 | 6.80E-105 | Myeloid ce AKR1B1   |
| 1669 | XBP1     | 3.69E-109 | -0.80055 | 0.268 | 0.378 | 6.92E-105 | Myeloid ce XBP1     |
| 1670 | HLA-DPA1 | 6.74E-109 | 0.253041 | 0.659 | 0.436 | 1.27E-104 | Myeloid ce HLA-DPA1 |
| 1671 | LIMS2    | 8.46E-109 | -0.40581 | 0.013 | 0.112 | 1.59E-104 | Myeloid ce LIMS2    |
| 1672 | PLCG1    | 8.89E-109 | -0.36581 | 0.014 | 0.114 | 1.67E-104 | Myeloid ce PLCG1    |
| 1673 | PIM1     | 2.36E-108 | -0.66972 | 0.314 | 0.435 | 4.44E-104 | Myeloid ce PIM1     |
| 1674 | RORA     | 5.40E-108 | -0.39192 | 0.014 | 0.113 | 1.02E-103 | Myeloid ce RORA     |
| 1675 | UCP2     | 7.13E-108 | -0.39687 | 0.696 | 0.79  | 1.34E-103 | Myeloid ce UCP2     |
| 1676 | TMEM50A  | 9.69E-108 | 0.292386 | 0.652 | 0.461 | 1.82E-103 | Myeloid ce TMEM50A  |
| 1677 | TNIK     | 1.57E-107 | -0.39031 | 0.023 | 0.128 | 2.95E-103 | Myeloid ce TNIK     |
| 1678 | CD22     | 1.74E-107 | -0.5418  | 0.02  | 0.122 | 3.27E-103 | Myeloid ce CD22     |
| 1679 | ARHGEF1  | 2.16E-106 | -0.52138 | 0.504 | 0.562 | 4.05E-102 | Myeloid ce ARHGEF1  |
| 1680 | BNIP3    | 2.25E-106 | -0.44804 | 0.068 | 0.185 | 4.22E-102 | Myeloid ce BNIP3    |
| 1681 | MAP4K1   | 2.91E-106 | -0.46043 | 0.079 | 0.2   | 5.46E-102 | Myeloid ce MAP4K1   |
| 1682 | GADD45B  | 4.07E-106 | 0.280916 | 0.29  | 0.155 | 7.65E-102 | Myeloid ce GADD45B  |
| 1683 | C1orf43  | 7.00E-106 | 0.263866 | 0.513 | 0.325 | 1.31E-101 | Myeloid ce C1orf43  |
| 1684 | TMPO     | 1.81E-105 | 0.259195 | 0.358 | 0.205 | 3.40E-101 | Myeloid ce TMPO     |
| 1685 | SNHG7    | 7.98E-105 | -0.61086 | 0.159 | 0.285 | 1.50E-100 | Myeloid ce SNHG7    |
| 1686 | CD52     | 1.33E-104 | -0.41794 | 0.743 | 0.836 | 2.50E-100 | Myeloid ce CD52     |
| 1687 | PLEKHF1  | 3.45E-104 | -0.4161  | 0.009 | 0.101 | 6.49E-100 | Myeloid ce PLEKHF1  |
| 1688 | NFATC2   | 5.74E-104 | -0.39605 | 0.018 | 0.116 | 1.08E-99  | Myeloid ce NFATC2   |
| 1689 | DDIT4    | 7.19E-104 | -0.57882 | 0.07  | 0.188 | 1.35E-99  | Myeloid ce DDIT4    |
| 1690 | TMC8     | 1.58E-103 | -0.53249 | 0.167 | 0.292 | 2.96E-99  | Myeloid ce TMC8     |
| 1691 | KIF2A    | 3.66E-103 | -0.5266  | 0.201 | 0.324 | 6.87E-99  | Myeloid ce KIF2A    |



|      |          |           |          |       |       |          |                      |
|------|----------|-----------|----------|-------|-------|----------|----------------------|
| 1692 | CBLB     | 3.92E-103 | -0.44071 | 0.049 | 0.159 | 7.36E-99 | Myeloid ce CBLB      |
| 1693 | ZCCHC7   | 5.87E-103 | -0.54382 | 0.112 | 0.233 | 1.10E-98 | Myeloid ce ZCCHC7    |
| 1694 | CANX     | 7.00E-103 | 0.266948 | 0.455 | 0.279 | 1.32E-98 | Myeloid ce CANX      |
| 1695 | CISH     | 8.23E-103 | -0.89343 | 0.099 | 0.214 | 1.55E-98 | Myeloid ce CISH      |
| 1696 | NOP58    | 9.75E-103 | -0.49952 | 0.166 | 0.287 | 1.83E-98 | Myeloid ce NOP58     |
| 1697 | TSEN54   | 1.13E-102 | -0.49647 | 0.067 | 0.18  | 2.12E-98 | Myeloid ce TSEN54    |
| 1698 | NAE1     | 1.21E-102 | -0.44025 | 0.073 | 0.189 | 2.26E-98 | Myeloid ce NAE1      |
| 1699 | YWHAZ    | 1.35E-102 | -0.37887 | 0.79  | 0.806 | 2.54E-98 | Myeloid ce YWHAZ     |
| 1700 | KCNA3    | 2.89E-102 | -0.34862 | 0.019 | 0.117 | 5.42E-98 | Myeloid ce KCNA3     |
| 1701 | MLLT3    | 4.53E-102 | -0.38144 | 0.023 | 0.122 | 8.52E-98 | Myeloid ce MLLT3     |
| 1702 | POU2AF1  | 5.66E-102 | -0.42069 | 0.012 | 0.106 | 1.06E-97 | Myeloid ce POU2AF1   |
| 1703 | PGS1     | 1.86E-101 | 0.469874 | 0.247 | 0.132 | 3.50E-97 | Myeloid ce PGS1      |
| 1704 | HCLS1    | 4.82E-101 | 0.308321 | 0.794 | 0.649 | 9.05E-97 | Myeloid ce HCLS1     |
| 1705 | SF3B5    | 2.08E-100 | 0.292483 | 0.633 | 0.439 | 3.91E-96 | Myeloid ce SF3B5     |
| 1706 | PTPN4    | 3.62E-100 | -0.4408  | 0.046 | 0.154 | 6.80E-96 | Myeloid ce PTPN4     |
| 1707 | NDUFS5   | 5.38E-100 | 0.313093 | 0.704 | 0.53  | 1.01E-95 | Myeloid ce NDUFS5    |
| 1708 | FKBP5    | 7.42E-100 | 0.261619 | 0.25  | 0.132 | 1.39E-95 | Myeloid ce FKBP5     |
| 1709 | SEC61G   | 1.19E-99  | 0.266344 | 0.694 | 0.491 | 2.24E-95 | Myeloid ce SEC61G    |
| 1710 | IFI16    | 2.33E-99  | 0.252403 | 0.461 | 0.288 | 4.38E-95 | Myeloid ce IFI16     |
| 1711 | GRAP     | 5.45E-99  | -0.3618  | 0.021 | 0.117 | 1.02E-94 | Myeloid ce GRAP      |
| 1712 | CHRM3-AS | 1.45E-98  | -0.36139 | 0.012 | 0.104 | 2.72E-94 | Myeloid ce CHRM3-AS2 |
| 1713 | SYTL1    | 1.48E-98  | -0.50697 | 0.339 | 0.45  | 2.78E-94 | Myeloid ce SYTL1     |
| 1714 | EPC1     | 1.96E-98  | -0.50586 | 0.347 | 0.447 | 3.67E-94 | Myeloid ce EPC1      |
| 1715 | CCL4     | 2.21E-98  | -1.13611 | 0.02  | 0.115 | 4.15E-94 | Myeloid ce CCL4      |
| 1716 | PPM1K    | 2.01E-97  | -0.49077 | 0.093 | 0.209 | 3.78E-93 | Myeloid ce PPM1K     |
| 1717 | BCL11B   | 5.43E-97  | -0.37719 | 0.022 | 0.118 | 1.02E-92 | Myeloid ce BCL11B    |
| 1718 | SRRM2    | 6.00E-97  | 0.272312 | 0.471 | 0.299 | 1.13E-92 | Myeloid ce SRRM2     |
| 1719 | EIF3G    | 6.60E-97  | -0.3608  | 0.733 | 0.768 | 1.24E-92 | Myeloid ce EIF3G     |
| 1720 | MCM3     | 1.19E-96  | -0.42408 | 0.062 | 0.171 | 2.24E-92 | Myeloid ce MCM3      |
| 1721 | ATP5MD   | 1.67E-96  | 0.310585 | 0.755 | 0.595 | 3.14E-92 | Myeloid ce ATP5MD    |
| 1722 | BTLA     | 2.20E-96  | -0.40249 | 0.014 | 0.105 | 4.13E-92 | Myeloid ce BTLA      |
| 1723 | KLF12    | 1.42E-95  | -0.37498 | 0.027 | 0.124 | 2.66E-91 | Myeloid ce KLF12     |
| 1724 | SERBP1   | 2.01E-95  | -0.43846 | 0.535 | 0.586 | 3.77E-91 | Myeloid ce SERBP1    |
| 1725 | RAB7A    | 2.42E-95  | 0.279383 | 0.595 | 0.413 | 4.55E-91 | Myeloid ce RAB7A     |
| 1726 | NDUFA6   | 1.60E-94  | 0.276544 | 0.555 | 0.375 | 3.01E-90 | Myeloid ce NDUFA6    |
| 1727 | ANP32B   | 2.20E-94  | -0.41071 | 0.624 | 0.655 | 4.13E-90 | Myeloid ce ANP32B    |
| 1728 | SHMT2    | 5.92E-94  | -0.59638 | 0.204 | 0.308 | 1.11E-89 | Myeloid ce SHMT2     |
| 1729 | BEX3     | 1.08E-93  | -0.45911 | 0.08  | 0.195 | 2.03E-89 | Myeloid ce BEX3      |
| 1730 | HNRNPR   | 2.79E-93  | -0.50082 | 0.339 | 0.428 | 5.23E-89 | Myeloid ce HNRNPR    |
| 1731 | COPS9    | 5.72E-93  | 0.254916 | 0.556 | 0.366 | 1.07E-88 | Myeloid ce COPS9     |
| 1732 | TRAPPC6A | 1.31E-92  | -0.50657 | 0.186 | 0.297 | 2.46E-88 | Myeloid ce TRAPPC6A  |
| 1733 | G3BP1    | 1.66E-92  | -0.52586 | 0.206 | 0.315 | 3.12E-88 | Myeloid ce G3BP1     |
| 1734 | USP11    | 2.06E-92  | -0.43874 | 0.075 | 0.182 | 3.88E-88 | Myeloid ce USP11     |
| 1735 | ILF2     | 4.20E-92  | -0.47899 | 0.376 | 0.452 | 7.89E-88 | Myeloid ce ILF2      |
| 1736 | ACP1     | 6.00E-92  | -0.48672 | 0.331 | 0.42  | 1.13E-87 | Myeloid ce ACP1      |
| 1737 | NDUFB2   | 8.51E-92  | 0.28483  | 0.759 | 0.625 | 1.60E-87 | Myeloid ce NDUFB2    |
| 1738 | PARP15   | 8.65E-92  | -0.40563 | 0.029 | 0.123 | 1.63E-87 | Myeloid ce PARP15    |

|      |           |          |          |       |       |          |                       |
|------|-----------|----------|----------|-------|-------|----------|-----------------------|
| 1739 | DEF6      | 1.07E-91 | -0.50037 | 0.245 | 0.354 | 2.00E-87 | Myeloid ce DEF6       |
| 1740 | FAM30A    | 1.10E-91 | -0.54607 | 0.016 | 0.104 | 2.06E-87 | Myeloid ce FAM30A     |
| 1741 | KRT10     | 1.20E-91 | -0.49399 | 0.292 | 0.395 | 2.25E-87 | Myeloid ce KRT10      |
| 1742 | GNLY      | 2.94E-91 | -2.91712 | 0.022 | 0.111 | 5.51E-87 | Myeloid ce GNLY       |
| 1743 | ISYNA1    | 3.86E-91 | -0.34158 | 0.017 | 0.105 | 7.25E-87 | Myeloid ce ISYNA1     |
| 1744 | REXO2     | 5.59E-91 | -0.49901 | 0.14  | 0.252 | 1.05E-86 | Myeloid ce REXO2      |
| 1745 | TMEM123   | 7.60E-91 | -0.53308 | 0.393 | 0.469 | 1.43E-86 | Myeloid ce TMEM123    |
| 1746 | CENPK     | 1.60E-90 | -0.32774 | 0.019 | 0.108 | 3.00E-86 | Myeloid ce CENPK      |
| 1747 | NLRC3     | 2.34E-90 | -0.31824 | 0.014 | 0.1   | 4.40E-86 | Myeloid ce NLRC3      |
| 1748 | PBXIP1    | 3.81E-90 | -0.46001 | 0.104 | 0.217 | 7.15E-86 | Myeloid ce PBXIP1     |
| 1749 | BCL2      | 6.37E-90 | -0.35516 | 0.024 | 0.115 | 1.20E-85 | Myeloid ce BCL2       |
| 1750 | RASAL3    | 7.24E-90 | -0.51151 | 0.161 | 0.273 | 1.36E-85 | Myeloid ce RASAL3     |
| 1751 | AC073111. | 7.77E-90 | -0.34869 | 0.024 | 0.115 | 1.46E-85 | Myeloid ce AC073111.5 |
| 1752 | BTG2      | 9.26E-90 | 0.426776 | 0.416 | 0.267 | 1.74E-85 | Myeloid ce BTG2       |
| 1753 | AP002387. | 9.39E-90 | -0.34687 | 0.029 | 0.123 | 1.76E-85 | Myeloid ce AP002387.2 |
| 1754 | PXN       | 1.34E-89 | 0.284541 | 0.273 | 0.155 | 2.52E-85 | Myeloid ce PXN        |
| 1755 | GPX7      | 1.71E-89 | -0.34213 | 0.034 | 0.13  | 3.21E-85 | Myeloid ce GPX7       |
| 1756 | RPL7      | 2.57E-89 | -0.28672 | 0.852 | 0.869 | 4.83E-85 | Myeloid ce RPL7       |
| 1757 | ESYT1     | 5.37E-89 | -0.45771 | 0.114 | 0.224 | 1.01E-84 | Myeloid ce ESYT1      |
| 1758 | TMEM263   | 6.39E-89 | -0.31767 | 0.021 | 0.109 | 1.20E-84 | Myeloid ce TMEM263    |
| 1759 | Sep-09    | 6.79E-89 | -0.4208  | 0.512 | 0.592 | 1.28E-84 | Myeloid ce Sep-09     |
| 1760 | ZFP36L2   | 2.26E-88 | -0.50019 | 0.576 | 0.636 | 4.24E-84 | Myeloid ce ZFP36L2    |
| 1761 | GCC2      | 5.17E-88 | -0.50867 | 0.189 | 0.299 | 9.70E-84 | Myeloid ce GCC2       |
| 1762 | EEF1G     | 5.56E-88 | -0.49137 | 0.115 | 0.223 | 1.04E-83 | Myeloid ce EEF1G      |
| 1763 | NAP1L4    | 8.39E-88 | -0.47943 | 0.173 | 0.283 | 1.58E-83 | Myeloid ce NAP1L4     |
| 1764 | ATF7IP2   | 1.33E-87 | -0.37845 | 0.044 | 0.141 | 2.49E-83 | Myeloid ce ATF7IP2    |
| 1765 | ABTB1     | 7.42E-86 | 0.330707 | 0.387 | 0.241 | 1.39E-81 | Myeloid ce ABTB1      |
| 1766 | SPON2     | 1.15E-85 | -1.04975 | 0.022 | 0.107 | 2.16E-81 | Myeloid ce SPON2      |
| 1767 | EIF2S3    | 1.17E-85 | -0.48758 | 0.387 | 0.464 | 2.20E-81 | Myeloid ce EIF2S3     |
| 1768 | JAK1      | 1.50E-85 | -0.44968 | 0.621 | 0.643 | 2.81E-81 | Myeloid ce JAK1       |
| 1769 | BLNK      | 1.61E-85 | -0.46357 | 0.036 | 0.129 | 3.03E-81 | Myeloid ce BLNK       |
| 1770 | RNPS1     | 5.36E-85 | -0.4634  | 0.384 | 0.457 | 1.01E-80 | Myeloid ce RNPS1      |
| 1771 | LAPTM4A   | 7.66E-85 | 0.25561  | 0.526 | 0.356 | 1.44E-80 | Myeloid ce LAPTM4A    |
| 1772 | AFF3      | 8.59E-85 | -0.46692 | 0.035 | 0.127 | 1.61E-80 | Myeloid ce AFF3       |
| 1773 | RBBP7     | 1.22E-84 | -0.48465 | 0.191 | 0.293 | 2.30E-80 | Myeloid ce RBBP7      |
| 1774 | TXNIP     | 2.05E-84 | -0.35699 | 0.725 | 0.776 | 3.85E-80 | Myeloid ce TXNIP      |
| 1775 | RPS27L    | 3.93E-84 | 0.330171 | 0.568 | 0.397 | 7.38E-80 | Myeloid ce RPS27L     |
| 1776 | RSL24D1   | 1.06E-83 | -0.43744 | 0.501 | 0.553 | 1.99E-79 | Myeloid ce RSL24D1    |
| 1777 | MEAF6     | 1.25E-83 | -0.47477 | 0.333 | 0.415 | 2.35E-79 | Myeloid ce MEAF6      |
| 1778 | AC093157. | 1.81E-82 | -0.33536 | 0.025 | 0.111 | 3.40E-78 | Myeloid ce AC093157.1 |
| 1779 | PLEKHA1   | 4.02E-82 | -0.39094 | 0.051 | 0.145 | 7.55E-78 | Myeloid ce PLEKHA1    |
| 1780 | DNAJB1    | 5.08E-82 | -0.5072  | 0.192 | 0.295 | 9.55E-78 | Myeloid ce DNAJB1     |
| 1781 | MT-ND2    | 5.80E-82 | 0.328201 | 0.907 | 0.842 | 1.09E-77 | Myeloid ce MT-ND2     |
| 1782 | FBL       | 1.00E-81 | -0.46637 | 0.254 | 0.355 | 1.88E-77 | Myeloid ce FBL        |
| 1783 | IGLC3     | 1.78E-81 | -0.98075 | 0.022 | 0.106 | 3.34E-77 | Myeloid ce IGLC3      |
| 1784 | OFD1      | 2.73E-81 | -0.41516 | 0.102 | 0.207 | 5.14E-77 | Myeloid ce OFD1       |
| 1785 | CLIC3     | 5.03E-81 | -0.76155 | 0.029 | 0.117 | 9.44E-77 | Myeloid ce CLIC3      |

|      |           |          |          |       |       |          |                       |
|------|-----------|----------|----------|-------|-------|----------|-----------------------|
| 1786 | PA2G4     | 4.08E-80 | -0.45586 | 0.395 | 0.462 | 7.66E-76 | Myeloid ce PA2G4      |
| 1787 | NIPSNAP1  | 9.73E-80 | -0.36977 | 0.059 | 0.153 | 1.83E-75 | Myeloid ce NIPSNAP1   |
| 1788 | MZB1      | 9.96E-80 | -0.66581 | 0.038 | 0.13  | 1.87E-75 | Myeloid ce MZB1       |
| 1789 | PSMB8-AS  | 1.83E-79 | -0.5099  | 0.348 | 0.427 | 3.43E-75 | Myeloid ce PSMB8-AS1  |
| 1790 | AC025164. | 1.83E-79 | -0.46003 | 0.067 | 0.163 | 3.44E-75 | Myeloid ce AC025164.1 |
| 1791 | UBAC2     | 1.54E-78 | -0.48321 | 0.212 | 0.308 | 2.90E-74 | Myeloid ce UBAC2      |
| 1792 | MCTP2     | 6.82E-77 | 0.260178 | 0.146 | 0.07  | 1.28E-72 | Myeloid ce MCTP2      |
| 1793 | STK4      | 1.90E-76 | -0.43121 | 0.455 | 0.518 | 3.56E-72 | Myeloid ce STK4       |
| 1794 | GZMB      | 4.49E-75 | -1.23701 | 0.032 | 0.116 | 8.43E-71 | Myeloid ce GZMB       |
| 1795 | GPR174    | 4.58E-75 | -0.35019 | 0.025 | 0.104 | 8.61E-71 | Myeloid ce GPR174     |
| 1796 | ERG28     | 5.17E-75 | -0.35257 | 0.062 | 0.154 | 9.71E-71 | Myeloid ce ERG28      |
| 1797 | GABPB1-AS | 6.29E-75 | -0.43145 | 0.093 | 0.189 | 1.18E-70 | Myeloid ce GABPB1-AS1 |
| 1798 | PITPNA-AS | 7.86E-75 | -0.36337 | 0.06  | 0.151 | 1.48E-70 | Myeloid ce PITPNA-AS1 |
| 1799 | CDC42SE2  | 1.40E-74 | -0.47083 | 0.216 | 0.313 | 2.64E-70 | Myeloid ce CDC42SE2   |
| 1800 | SUPT3H    | 2.37E-74 | -0.33513 | 0.032 | 0.113 | 4.46E-70 | Myeloid ce SUPT3H     |
| 1801 | IGLC2     | 2.43E-74 | -1.05285 | 0.03  | 0.112 | 4.56E-70 | Myeloid ce IGLC2      |
| 1802 | PDE3B     | 5.13E-74 | -0.38514 | 0.064 | 0.156 | 9.64E-70 | Myeloid ce PDE3B      |
| 1803 | UBE2L6    | 6.75E-74 | 0.291211 | 0.595 | 0.443 | 1.27E-69 | Myeloid ce UBE2L6     |
| 1804 | ATP2A3    | 3.44E-73 | -0.38483 | 0.098 | 0.199 | 6.46E-69 | Myeloid ce ATP2A3     |
| 1805 | RPL36AL   | 4.09E-73 | -0.27592 | 0.889 | 0.901 | 7.69E-69 | Myeloid ce RPL36AL    |
| 1806 | KRR1      | 5.86E-72 | -0.3883  | 0.087 | 0.18  | 1.10E-67 | Myeloid ce KRR1       |
| 1807 | WDR74     | 1.76E-71 | -0.42357 | 0.133 | 0.23  | 3.30E-67 | Myeloid ce WDR74      |
| 1808 | MT-ND4    | 3.93E-71 | 0.287376 | 0.968 | 0.955 | 7.39E-67 | Myeloid ce MT-ND4     |
| 1809 | TTC3      | 4.20E-71 | -0.45129 | 0.191 | 0.287 | 7.90E-67 | Myeloid ce TTC3       |
| 1810 | NSD3      | 6.11E-71 | -0.44924 | 0.25  | 0.344 | 1.15E-66 | Myeloid ce NSD3       |
| 1811 | RASA3     | 1.53E-70 | -0.43691 | 0.119 | 0.213 | 2.87E-66 | Myeloid ce RASA3      |
| 1812 | KLHDC2    | 1.78E-70 | -0.42832 | 0.139 | 0.234 | 3.34E-66 | Myeloid ce KLHDC2     |
| 1813 | TSPAN13   | 3.67E-70 | -0.38337 | 0.04  | 0.124 | 6.90E-66 | Myeloid ce TSPAN13    |
| 1814 | RPIA      | 3.89E-70 | -0.45523 | 0.17  | 0.262 | 7.31E-66 | Myeloid ce RPIA       |
| 1815 | CMPK1     | 6.86E-70 | -0.46219 | 0.241 | 0.329 | 1.29E-65 | Myeloid ce CMPK1      |
| 1816 | ODF2L     | 9.17E-70 | -0.3376  | 0.05  | 0.134 | 1.72E-65 | Myeloid ce ODF2L      |
| 1817 | GPR183    | 1.29E-69 | -0.30979 | 0.048 | 0.134 | 2.42E-65 | Myeloid ce GPR183     |
| 1818 | CHST12    | 2.59E-69 | -0.4593  | 0.075 | 0.164 | 4.86E-65 | Myeloid ce CHST12     |
| 1819 | KLF2      | 3.30E-69 | -0.599   | 0.426 | 0.508 | 6.21E-65 | Myeloid ce KLF2       |
| 1820 | ST6GAL1   | 5.90E-69 | -0.40773 | 0.086 | 0.176 | 1.11E-64 | Myeloid ce ST6GAL1    |
| 1821 | SP140     | 9.56E-69 | -0.4197  | 0.073 | 0.16  | 1.80E-64 | Myeloid ce SP140      |
| 1822 | TUBA4A    | 1.33E-68 | -0.39542 | 0.329 | 0.42  | 2.49E-64 | Myeloid ce TUBA4A     |
| 1823 | HMGN4     | 2.15E-68 | -0.46557 | 0.206 | 0.294 | 4.04E-64 | Myeloid ce HMGN4      |
| 1824 | GAMT      | 2.30E-68 | -0.31673 | 0.036 | 0.114 | 4.32E-64 | Myeloid ce GAMT       |
| 1825 | MARCKSL1  | 2.44E-68 | -0.49253 | 0.187 | 0.283 | 4.59E-64 | Myeloid ce MARCKSL1   |
| 1826 | ZNF146    | 5.39E-68 | -0.3654  | 0.073 | 0.16  | 1.01E-63 | Myeloid ce ZNF146     |
| 1827 | TSPAN3    | 7.92E-68 | -0.51825 | 0.128 | 0.217 | 1.49E-63 | Myeloid ce TSPAN3     |
| 1828 | ANP32A    | 1.35E-67 | 0.284348 | 0.624 | 0.452 | 2.54E-63 | Myeloid ce ANP32A     |
| 1829 | SPTBN1    | 1.43E-67 | -0.34542 | 0.076 | 0.166 | 2.69E-63 | Myeloid ce SPTBN1     |
| 1830 | SMDT1     | 3.06E-67 | -0.33434 | 0.662 | 0.684 | 5.75E-63 | Myeloid ce SMDT1      |
| 1831 | EBLN3P    | 3.57E-67 | -0.45858 | 0.142 | 0.234 | 6.71E-63 | Myeloid ce EBLN3P     |
| 1832 | YWHAQ     | 1.01E-66 | -0.48649 | 0.357 | 0.418 | 1.90E-62 | Myeloid ce YWHAQ      |

|      |           |          |          |       |       |          |                       |
|------|-----------|----------|----------|-------|-------|----------|-----------------------|
| 1833 | COX7C     | 4.91E-66 | -0.25598 | 0.877 | 0.895 | 9.22E-62 | Myeloid ce COX7C      |
| 1834 | MATR3.1   | 6.28E-66 | -0.37013 | 0.073 | 0.159 | 1.18E-61 | Myeloid ce MATR3.1    |
| 1835 | NGRN      | 6.87E-66 | -0.42635 | 0.128 | 0.215 | 1.29E-61 | Myeloid ce NGRN       |
| 1836 | IGKC      | 8.28E-66 | -1.77162 | 0.083 | 0.17  | 1.55E-61 | Myeloid ce IGKC       |
| 1837 | TAGLN2    | 1.60E-65 | 0.313476 | 0.852 | 0.762 | 3.01E-61 | Myeloid ce TAGLN2     |
| 1838 | ZRANB2    | 1.85E-65 | -0.43396 | 0.257 | 0.342 | 3.47E-61 | Myeloid ce ZRANB2     |
| 1839 | CNBP      | 2.15E-65 | -0.26205 | 0.786 | 0.81  | 4.04E-61 | Myeloid ce CNBP       |
| 1840 | PAXX      | 3.73E-65 | -0.46235 | 0.519 | 0.55  | 7.00E-61 | Myeloid ce PAXX       |
| 1841 | MT-CO3    | 9.62E-65 | 0.266898 | 0.978 | 0.949 | 1.81E-60 | Myeloid ce MT-CO3     |
| 1842 | SLC9A3R1  | 1.27E-64 | -0.56722 | 0.356 | 0.421 | 2.39E-60 | Myeloid ce SLC9A3R1   |
| 1843 | FAM107B   | 1.89E-64 | -0.40374 | 0.188 | 0.285 | 3.54E-60 | Myeloid ce FAM107B    |
| 1844 | TFAP4     | 2.06E-64 | -0.29118 | 0.034 | 0.109 | 3.88E-60 | Myeloid ce TFAP4      |
| 1845 | SNU13     | 2.70E-64 | -0.36724 | 0.523 | 0.557 | 5.07E-60 | Myeloid ce SNU13      |
| 1846 | SVIP      | 3.59E-64 | -0.30653 | 0.038 | 0.115 | 6.74E-60 | Myeloid ce SVIP       |
| 1847 | METTL23   | 3.75E-64 | -0.42403 | 0.186 | 0.275 | 7.04E-60 | Myeloid ce METTL23    |
| 1848 | GPBP1     | 7.29E-64 | -0.42718 | 0.273 | 0.357 | 1.37E-59 | Myeloid ce GPBP1      |
| 1849 | PPP1CC    | 1.17E-63 | -0.42047 | 0.394 | 0.451 | 2.20E-59 | Myeloid ce PPP1CC     |
| 1850 | TMEM109   | 1.83E-63 | -0.42337 | 0.174 | 0.263 | 3.44E-59 | Myeloid ce TMEM109    |
| 1851 | PNRC2     | 2.09E-63 | -0.43045 | 0.319 | 0.391 | 3.93E-59 | Myeloid ce PNRC2      |
| 1852 | RSAD1     | 2.36E-63 | -0.3609  | 0.091 | 0.177 | 4.43E-59 | Myeloid ce RSAD1      |
| 1853 | AKTIP     | 2.46E-63 | -0.30512 | 0.044 | 0.122 | 4.63E-59 | Myeloid ce AKTIP      |
| 1854 | DENND1C   | 3.68E-63 | -0.40036 | 0.135 | 0.223 | 6.91E-59 | Myeloid ce DENND1C    |
| 1855 | RBMX      | 7.94E-63 | -0.44958 | 0.298 | 0.37  | 1.49E-58 | Myeloid ce RBMX       |
| 1856 | SELENOM   | 8.17E-63 | -0.31665 | 0.037 | 0.112 | 1.53E-58 | Myeloid ce SELENOM    |
| 1857 | PAICS     | 8.79E-63 | -0.30285 | 0.048 | 0.125 | 1.65E-58 | Myeloid ce PAICS      |
| 1858 | MRPS18B   | 1.17E-62 | -0.4385  | 0.237 | 0.317 | 2.19E-58 | Myeloid ce MRPS18B    |
| 1859 | OCIAD1    | 1.59E-62 | -0.4192  | 0.376 | 0.434 | 2.98E-58 | Myeloid ce OCIAD1     |
| 1860 | PTGES3    | 4.50E-62 | -0.26782 | 0.622 | 0.674 | 8.45E-58 | Myeloid ce PTGES3     |
| 1861 | NOL11     | 4.66E-62 | -0.36169 | 0.098 | 0.184 | 8.75E-58 | Myeloid ce NOL11      |
| 1862 | PLSCR3    | 4.92E-62 | -0.4002  | 0.096 | 0.179 | 9.24E-58 | Myeloid ce PLSCR3     |
| 1863 | LRBA      | 1.02E-61 | -0.31624 | 0.051 | 0.128 | 1.91E-57 | Myeloid ce LRBA       |
| 1864 | GORASP2   | 1.11E-61 | -0.3885  | 0.152 | 0.238 | 2.09E-57 | Myeloid ce GORASP2    |
| 1865 | IFRD2     | 1.16E-61 | -0.34551 | 0.079 | 0.162 | 2.19E-57 | Myeloid ce IFRD2      |
| 1866 | DDX39A    | 1.55E-61 | -0.44527 | 0.27  | 0.344 | 2.92E-57 | Myeloid ce DDX39A     |
| 1867 | IARS      | 3.71E-61 | -0.29326 | 0.047 | 0.123 | 6.97E-57 | Myeloid ce IARS       |
| 1868 | ASF1A     | 4.33E-61 | -0.36113 | 0.092 | 0.176 | 8.13E-57 | Myeloid ce ASF1A      |
| 1869 | QTRT1     | 1.15E-60 | -0.37221 | 0.1   | 0.183 | 2.17E-56 | Myeloid ce QTRT1      |
| 1870 | NUCKS1    | 2.20E-60 | -0.44327 | 0.239 | 0.319 | 4.13E-56 | Myeloid ce NUCKS1     |
| 1871 | MTERF4    | 4.94E-60 | -0.37039 | 0.119 | 0.205 | 9.29E-56 | Myeloid ce MTERF4     |
| 1872 | POLD2     | 6.54E-60 | -0.37594 | 0.103 | 0.186 | 1.23E-55 | Myeloid ce POLD2      |
| 1873 | AC016831. | 6.97E-60 | -0.32736 | 0.063 | 0.143 | 1.31E-55 | Myeloid ce AC016831.7 |
| 1874 | BRIX1     | 7.14E-60 | -0.3492  | 0.083 | 0.164 | 1.34E-55 | Myeloid ce BRIX1      |
| 1875 | MED10     | 7.56E-60 | -0.41599 | 0.304 | 0.371 | 1.42E-55 | Myeloid ce MED10      |
| 1876 | TMEM106   | 7.68E-60 | -0.29472 | 0.038 | 0.11  | 1.44E-55 | Myeloid ce TMEM106C   |
| 1877 | MT-ATP8   | 8.06E-60 | -0.52844 | 0.338 | 0.413 | 1.51E-55 | Myeloid ce MT-ATP8    |
| 1878 | DNAJC9    | 1.65E-59 | -0.29489 | 0.042 | 0.114 | 3.09E-55 | Myeloid ce DNAJC9     |
| 1879 | ZBTB25    | 9.33E-59 | -0.27427 | 0.032 | 0.1   | 1.75E-54 | Myeloid ce ZBTB25     |

|      |           |          |          |       |       |          |                      |
|------|-----------|----------|----------|-------|-------|----------|----------------------|
| 1880 | NAP1L1    | 9.98E-59 | 0.313095 | 0.571 | 0.444 | 1.88E-54 | Myeloid ce NAP1L1    |
| 1881 | LINC00623 | 3.50E-58 | -0.37077 | 0.085 | 0.166 | 6.58E-54 | Myeloid ce LINC00623 |
| 1882 | CD38      | 3.60E-58 | -0.367   | 0.044 | 0.116 | 6.76E-54 | Myeloid ce CD38      |
| 1883 | ODC1      | 8.88E-58 | -0.39293 | 0.091 | 0.172 | 1.67E-53 | Myeloid ce ODC1      |
| 1884 | TFDP2     | 9.37E-58 | -0.30987 | 0.042 | 0.114 | 1.76E-53 | Myeloid ce TFDP2     |
| 1885 | NDUFAF4   | 9.92E-58 | -0.37614 | 0.117 | 0.199 | 1.86E-53 | Myeloid ce NDUFAF4   |
| 1886 | SNRPA     | 1.05E-57 | -0.42231 | 0.326 | 0.39  | 1.97E-53 | Myeloid ce SNRPA     |
| 1887 | RNASEH2B  | 1.09E-57 | -0.44438 | 0.251 | 0.326 | 2.05E-53 | Myeloid ce RNASEH2B  |
| 1888 | PDK1      | 1.34E-57 | -0.26245 | 0.034 | 0.104 | 2.51E-53 | Myeloid ce PDK1      |
| 1889 | TMEM106B  | 2.43E-57 | -0.33732 | 0.082 | 0.162 | 4.57E-53 | Myeloid ce TMEM106B  |
| 1890 | TAF7      | 2.83E-57 | -0.42007 | 0.271 | 0.348 | 5.31E-53 | Myeloid ce TAF7      |
| 1891 | SF3A2     | 3.00E-57 | -0.41144 | 0.243 | 0.319 | 5.63E-53 | Myeloid ce SF3A2     |
| 1892 | HIST1H1D  | 5.28E-57 | -0.40763 | 0.102 | 0.185 | 9.92E-53 | Myeloid ce HIST1H1D  |
| 1893 | ULK3      | 8.33E-57 | -0.32599 | 0.07  | 0.147 | 1.56E-52 | Myeloid ce ULK3      |
| 1894 | ABCE1     | 8.85E-57 | -0.36299 | 0.11  | 0.191 | 1.66E-52 | Myeloid ce ABCE1     |
| 1895 | CD47      | 1.66E-56 | -0.42423 | 0.427 | 0.475 | 3.12E-52 | Myeloid ce CD47      |
| 1896 | UBE2N     | 1.68E-56 | -0.39945 | 0.353 | 0.409 | 3.15E-52 | Myeloid ce UBE2N     |
| 1897 | MTFP1     | 1.85E-56 | -0.26148 | 0.039 | 0.108 | 3.47E-52 | Myeloid ce MTFP1     |
| 1898 | HACD3     | 1.93E-56 | -0.31645 | 0.061 | 0.136 | 3.62E-52 | Myeloid ce HACD3     |
| 1899 | LSM2      | 9.16E-56 | -0.41128 | 0.318 | 0.382 | 1.72E-51 | Myeloid ce LSM2      |
| 1900 | HDDC2     | 1.49E-55 | -0.39564 | 0.172 | 0.254 | 2.80E-51 | Myeloid ce HDDC2     |
| 1901 | RRP1B     | 1.78E-55 | -0.32188 | 0.084 | 0.163 | 3.35E-51 | Myeloid ce RRP1B     |
| 1902 | PRPS1     | 2.55E-55 | -0.30826 | 0.064 | 0.138 | 4.80E-51 | Myeloid ce PRPS1     |
| 1903 | ANKRD12   | 2.60E-55 | -0.39624 | 0.335 | 0.402 | 4.89E-51 | Myeloid ce ANKRD12   |
| 1904 | RASA2     | 3.62E-55 | -0.35051 | 0.125 | 0.21  | 6.80E-51 | Myeloid ce RASA2     |
| 1905 | CEACAM21  | 3.91E-55 | -0.28416 | 0.042 | 0.111 | 7.35E-51 | Myeloid ce CEACAM21  |
| 1906 | MAGEH1    | 8.99E-55 | -0.2698  | 0.041 | 0.109 | 1.69E-50 | Myeloid ce MAGEH1    |
| 1907 | UBIAD1    | 9.00E-55 | -0.30617 | 0.062 | 0.135 | 1.69E-50 | Myeloid ce UBIAD1    |
| 1908 | NOB1      | 9.47E-55 | -0.37743 | 0.138 | 0.218 | 1.78E-50 | Myeloid ce NOB1      |
| 1909 | FAM162A   | 1.28E-54 | -0.40259 | 0.202 | 0.279 | 2.40E-50 | Myeloid ce FAM162A   |
| 1910 | MPI       | 1.40E-54 | -0.26773 | 0.045 | 0.115 | 2.64E-50 | Myeloid ce MPI       |
| 1911 | CALM1     | 2.28E-54 | -0.33353 | 0.895 | 0.877 | 4.28E-50 | Myeloid ce CALM1     |
| 1912 | SRSF7     | 3.00E-54 | -0.35864 | 0.522 | 0.554 | 5.64E-50 | Myeloid ce SRSF7     |
| 1913 | SLC44A2   | 3.55E-54 | -0.4207  | 0.27  | 0.343 | 6.68E-50 | Myeloid ce SLC44A2   |
| 1914 | BUD23     | 6.90E-54 | -0.38916 | 0.171 | 0.25  | 1.30E-49 | Myeloid ce BUD23     |
| 1915 | MAD1L1    | 8.41E-54 | -0.42966 | 0.209 | 0.284 | 1.58E-49 | Myeloid ce MAD1L1    |
| 1916 | VCPKMT    | 9.94E-54 | -0.30016 | 0.048 | 0.118 | 1.87E-49 | Myeloid ce VCPKMT    |
| 1917 | TUT4      | 1.53E-53 | -0.33822 | 0.124 | 0.21  | 2.87E-49 | Myeloid ce TUT4      |
| 1918 | IL27RA    | 1.78E-53 | -0.40918 | 0.191 | 0.27  | 3.34E-49 | Myeloid ce IL27RA    |
| 1919 | DARS      | 2.78E-53 | -0.39479 | 0.202 | 0.281 | 5.23E-49 | Myeloid ce DARS      |
| 1920 | CYB561A3  | 3.14E-53 | -0.57814 | 0.18  | 0.255 | 5.90E-49 | Myeloid ce CYB561A3  |
| 1921 | CCNG1     | 3.95E-53 | -0.39384 | 0.144 | 0.222 | 7.42E-49 | Myeloid ce CCNG1     |
| 1922 | ZFAND1    | 7.63E-53 | -0.37738 | 0.138 | 0.216 | 1.43E-48 | Myeloid ce ZFAND1    |
| 1923 | THRAP3    | 9.47E-53 | -0.3994  | 0.383 | 0.43  | 1.78E-48 | Myeloid ce THRAP3    |
| 1924 | DNAJA3    | 1.45E-52 | -0.30342 | 0.059 | 0.129 | 2.72E-48 | Myeloid ce DNAJA3    |
| 1925 | JCHAIN    | 2.89E-52 | -1.2103  | 0.048 | 0.119 | 5.44E-48 | Myeloid ce JCHAIN    |
| 1926 | LSM14A    | 6.41E-52 | -0.41038 | 0.304 | 0.365 | 1.20E-47 | Myeloid ce LSM14A    |

|      |          |          |          |       |       |          |                         |
|------|----------|----------|----------|-------|-------|----------|-------------------------|
| 1927 | BTN3A2   | 6.47E-52 | -0.43198 | 0.187 | 0.262 | 1.22E-47 | Myeloid ce BTN3A2       |
| 1928 | GNG7     | 7.02E-52 | -0.33703 | 0.041 | 0.107 | 1.32E-47 | Myeloid ce GNG7         |
| 1929 | LSM7     | 7.65E-52 | -0.32735 | 0.636 | 0.642 | 1.44E-47 | Myeloid ce LSM7         |
| 1930 | NKG7     | 1.11E-51 | -2.25627 | 0.323 | 0.188 | 2.08E-47 | Myeloid ce NKG7         |
| 1931 | CCNB1IP1 | 1.41E-51 | -0.30265 | 0.056 | 0.125 | 2.65E-47 | Myeloid ce CCNB1IP1     |
| 1932 | MT-ND6   | 1.62E-51 | -0.40731 | 0.197 | 0.278 | 3.03E-47 | Myeloid ce MT-ND6       |
| 1933 | MAPKAPK5 | 1.66E-51 | -0.3961  | 0.17  | 0.247 | 3.12E-47 | Myeloid ce MAPKAPK5-AS1 |
| 1934 | ZNF302   | 2.44E-51 | -0.34826 | 0.103 | 0.179 | 4.59E-47 | Myeloid ce ZNF302       |
| 1935 | QRSL1    | 2.53E-51 | -0.39149 | 0.068 | 0.138 | 4.75E-47 | Myeloid ce QRSL1        |
| 1936 | DDX6     | 3.19E-51 | -0.41366 | 0.212 | 0.288 | 6.00E-47 | Myeloid ce DDX6         |
| 1937 | SMPD1    | 3.45E-51 | -0.32221 | 0.072 | 0.144 | 6.47E-47 | Myeloid ce SMPD1        |
| 1938 | PITHD1   | 3.52E-51 | -0.37948 | 0.15  | 0.226 | 6.61E-47 | Myeloid ce PITHD1       |
| 1939 | NT5DC1   | 7.73E-51 | -0.30747 | 0.083 | 0.157 | 1.45E-46 | Myeloid ce NT5DC1       |
| 1940 | MDH1     | 1.14E-50 | -0.3752  | 0.37  | 0.415 | 2.14E-46 | Myeloid ce MDH1         |
| 1941 | TUBA1B   | 1.92E-50 | 0.380409 | 0.609 | 0.506 | 3.60E-46 | Myeloid ce TUBA1B       |
| 1942 | ZNF493   | 2.14E-50 | -0.26608 | 0.041 | 0.105 | 4.01E-46 | Myeloid ce ZNF493       |
| 1943 | HSPA9    | 2.24E-50 | -0.39061 | 0.231 | 0.3   | 4.22E-46 | Myeloid ce HSPA9        |
| 1944 | PTPN7    | 2.59E-50 | -0.25559 | 0.041 | 0.107 | 4.87E-46 | Myeloid ce PTPN7        |
| 1945 | RAD21    | 3.03E-50 | -0.39941 | 0.295 | 0.358 | 5.69E-46 | Myeloid ce RAD21        |
| 1946 | SF3A1    | 3.38E-50 | -0.39574 | 0.235 | 0.304 | 6.35E-46 | Myeloid ce SF3A1        |
| 1947 | MAX      | 5.58E-50 | -0.37887 | 0.331 | 0.392 | 1.05E-45 | Myeloid ce MAX          |
| 1948 | C19orf48 | 9.56E-50 | -0.2635  | 0.047 | 0.112 | 1.80E-45 | Myeloid ce C19orf48     |
| 1949 | DNAJC19  | 9.67E-50 | -0.4001  | 0.232 | 0.3   | 1.82E-45 | Myeloid ce DNAJC19      |
| 1950 | UBTF     | 1.14E-49 | -0.36412 | 0.13  | 0.207 | 2.14E-45 | Myeloid ce UBTF         |
| 1951 | C11orf58 | 1.23E-49 | -0.3236  | 0.548 | 0.572 | 2.32E-45 | Myeloid ce C11orf58     |
| 1952 | SH3BP5   | 2.14E-49 | -0.42423 | 0.168 | 0.245 | 4.01E-45 | Myeloid ce SH3BP5       |
| 1953 | FBXO44   | 4.98E-49 | -0.30423 | 0.06  | 0.128 | 9.35E-45 | Myeloid ce FBXO44       |
| 1954 | CFAP97   | 5.51E-49 | -0.32663 | 0.082 | 0.153 | 1.03E-44 | Myeloid ce CFAP97       |
| 1955 | RPA1     | 8.76E-49 | -0.3087  | 0.083 | 0.154 | 1.64E-44 | Myeloid ce RPA1         |
| 1956 | HNRNPA3  | 1.01E-48 | -0.35401 | 0.519 | 0.539 | 1.90E-44 | Myeloid ce HNRNPA3      |
| 1957 | NPRL2    | 1.12E-48 | -0.33446 | 0.085 | 0.157 | 2.11E-44 | Myeloid ce NPRL2        |
| 1958 | BOLA3    | 1.34E-48 | -0.36028 | 0.118 | 0.191 | 2.52E-44 | Myeloid ce BOLA3        |
| 1959 | EXOSC8   | 2.12E-48 | -0.3707  | 0.136 | 0.209 | 3.99E-44 | Myeloid ce EXOSC8       |
| 1960 | LINS1    | 2.17E-48 | -0.31007 | 0.072 | 0.141 | 4.08E-44 | Myeloid ce LINS1        |
| 1961 | COX11    | 3.50E-48 | -0.28958 | 0.06  | 0.127 | 6.58E-44 | Myeloid ce COX11        |
| 1962 | NHP2     | 4.30E-48 | -0.36707 | 0.393 | 0.436 | 8.08E-44 | Myeloid ce NHP2         |
| 1963 | CXXC5    | 4.65E-48 | -0.42585 | 0.079 | 0.149 | 8.73E-44 | Myeloid ce CXXC5        |
| 1964 | CCSER2   | 7.75E-48 | -0.29747 | 0.065 | 0.132 | 1.46E-43 | Myeloid ce CCSER2       |
| 1965 | EZR      | 8.59E-48 | -0.54047 | 0.381 | 0.428 | 1.61E-43 | Myeloid ce EZR          |
| 1966 | RDH14    | 9.53E-48 | -0.3294  | 0.093 | 0.164 | 1.79E-43 | Myeloid ce RDH14        |
| 1967 | SNHG12   | 1.60E-47 | -0.33506 | 0.077 | 0.146 | 3.01E-43 | Myeloid ce SNHG12       |
| 1968 | ISCU     | 1.65E-47 | -0.35109 | 0.508 | 0.522 | 3.11E-43 | Myeloid ce ISCU         |
| 1969 | PNN      | 1.84E-47 | -0.38215 | 0.273 | 0.34  | 3.45E-43 | Myeloid ce PNN          |
| 1970 | NPAT     | 1.99E-47 | -0.29325 | 0.054 | 0.119 | 3.74E-43 | Myeloid ce NPAT         |
| 1971 | TMEM223  | 2.21E-47 | -0.33789 | 0.104 | 0.176 | 4.16E-43 | Myeloid ce TMEM223      |
| 1972 | SDHAF3   | 2.29E-47 | -0.33134 | 0.113 | 0.186 | 4.31E-43 | Myeloid ce SDHAF3       |
| 1973 | NSMCE1   | 3.28E-47 | -0.41318 | 0.28  | 0.338 | 6.15E-43 | Myeloid ce NSMCE1       |

|      |          |          |          |       |       |          |                     |
|------|----------|----------|----------|-------|-------|----------|---------------------|
| 1974 | TAF1D    | 4.01E-47 | -0.38014 | 0.258 | 0.327 | 7.53E-43 | Myeloid ce TAF1D    |
| 1975 | BIRC3    | 4.10E-47 | -0.44065 | 0.105 | 0.175 | 7.69E-43 | Myeloid ce BIRC3    |
| 1976 | SAE1     | 4.71E-47 | -0.32682 | 0.103 | 0.174 | 8.85E-43 | Myeloid ce SAE1     |
| 1977 | PRPSAP2  | 8.02E-47 | -0.3469  | 0.12  | 0.192 | 1.51E-42 | Myeloid ce PRPSAP2  |
| 1978 | C9orf78  | 1.41E-46 | -0.37599 | 0.335 | 0.391 | 2.65E-42 | Myeloid ce C9orf78  |
| 1979 | AP1G2    | 1.55E-46 | -0.37543 | 0.188 | 0.259 | 2.92E-42 | Myeloid ce AP1G2    |
| 1980 | TRAM1    | 1.67E-46 | -0.36082 | 0.351 | 0.403 | 3.14E-42 | Myeloid ce TRAM1    |
| 1981 | SGF29    | 1.91E-46 | -0.36177 | 0.141 | 0.214 | 3.59E-42 | Myeloid ce SGF29    |
| 1982 | C19orf66 | 2.52E-46 | -0.40066 | 0.255 | 0.32  | 4.74E-42 | Myeloid ce C19orf66 |
| 1983 | ATXN10   | 4.18E-46 | -0.3745  | 0.285 | 0.342 | 7.85E-42 | Myeloid ce ATXN10   |
| 1984 | DUSP11   | 4.23E-46 | -0.33926 | 0.114 | 0.184 | 7.96E-42 | Myeloid ce DUSP11   |
| 1985 | CDK4     | 1.45E-45 | -0.37728 | 0.162 | 0.23  | 2.72E-41 | Myeloid ce CDK4     |
| 1986 | MRPS26   | 1.92E-45 | -0.38611 | 0.207 | 0.274 | 3.61E-41 | Myeloid ce MRPS26   |
| 1987 | PUF60    | 2.03E-45 | -0.36183 | 0.346 | 0.395 | 3.81E-41 | Myeloid ce PUF60    |
| 1988 | CNST     | 3.43E-45 | -0.32844 | 0.102 | 0.172 | 6.45E-41 | Myeloid ce CNST     |
| 1989 | ZBTB20   | 3.68E-45 | -0.33098 | 0.085 | 0.153 | 6.91E-41 | Myeloid ce ZBTB20   |
| 1990 | EIF5A    | 4.94E-45 | -0.35654 | 0.52  | 0.532 | 9.28E-41 | Myeloid ce EIF5A    |
| 1991 | WDR54    | 9.34E-45 | -0.27393 | 0.05  | 0.111 | 1.75E-40 | Myeloid ce WDR54    |
| 1992 | PCID2    | 1.37E-44 | -0.3417  | 0.111 | 0.18  | 2.57E-40 | Myeloid ce PCID2    |
| 1993 | MAGEF1   | 1.56E-44 | -0.28682 | 0.063 | 0.127 | 2.92E-40 | Myeloid ce MAGEF1   |
| 1994 | SELENOH  | 1.72E-44 | -0.27236 | 0.71  | 0.718 | 3.23E-40 | Myeloid ce SELENOH  |
| 1995 | SMYD2    | 2.32E-44 | -0.26542 | 0.066 | 0.131 | 4.36E-40 | Myeloid ce SMYD2    |
| 1996 | LSM5     | 5.48E-44 | -0.38992 | 0.329 | 0.376 | 1.03E-39 | Myeloid ce LSM5     |
| 1997 | CRLF3    | 1.41E-43 | -0.38152 | 0.222 | 0.286 | 2.64E-39 | Myeloid ce CRLF3    |
| 1998 | NGDN     | 2.56E-43 | -0.37313 | 0.191 | 0.255 | 4.81E-39 | Myeloid ce NGDN     |
| 1999 | FAM3C    | 3.56E-43 | -0.32277 | 0.049 | 0.108 | 6.69E-39 | Myeloid ce FAM3C    |
| 2000 | SS18L2   | 3.75E-43 | -0.37002 | 0.266 | 0.324 | 7.05E-39 | Myeloid ce SS18L2   |
| 2001 | ATAD1    | 4.17E-43 | -0.29967 | 0.077 | 0.143 | 7.83E-39 | Myeloid ce ATAD1    |
| 2002 | CCL5     | 5.75E-43 | -1.99081 | 0.093 | 0.156 | 1.08E-38 | Myeloid ce CCL5     |
| 2003 | PTDSS1   | 1.05E-42 | -0.36665 | 0.218 | 0.281 | 1.97E-38 | Myeloid ce PTDSS1   |
| 2004 | GIMAP4   | 1.11E-42 | -0.51931 | 0.609 | 0.564 | 2.08E-38 | Myeloid ce GIMAP4   |
| 2005 | PITPNC1  | 1.66E-42 | -0.34363 | 0.107 | 0.174 | 3.12E-38 | Myeloid ce PITPNC1  |
| 2006 | PPA1     | 1.87E-42 | -0.34067 | 0.33  | 0.383 | 3.51E-38 | Myeloid ce PPA1     |
| 2007 | NUDCD2   | 1.92E-42 | -0.36085 | 0.208 | 0.271 | 3.60E-38 | Myeloid ce NUDCD2   |
| 2008 | SDHA     | 2.10E-42 | -0.37203 | 0.227 | 0.289 | 3.95E-38 | Myeloid ce SDHA     |
| 2009 | JUN      | 2.71E-42 | -0.35851 | 0.106 | 0.177 | 5.09E-38 | Myeloid ce JUN      |
| 2010 | ZNF101   | 2.86E-42 | -0.25152 | 0.048 | 0.107 | 5.38E-38 | Myeloid ce ZNF101   |
| 2011 | CCT8     | 3.97E-42 | -0.32382 | 0.446 | 0.476 | 7.46E-38 | Myeloid ce CCT8     |
| 2012 | ARPC5L   | 6.21E-42 | -0.43449 | 0.269 | 0.324 | 1.17E-37 | Myeloid ce ARPC5L   |
| 2013 | CDKN1B   | 7.17E-42 | -0.37389 | 0.231 | 0.294 | 1.35E-37 | Myeloid ce CDKN1B   |
| 2014 | SMIM27   | 1.13E-41 | -0.32658 | 0.14  | 0.212 | 2.12E-37 | Myeloid ce SMIM27   |
| 2015 | TOMM5    | 2.67E-41 | -0.36108 | 0.332 | 0.378 | 5.02E-37 | Myeloid ce TOMM5    |
| 2016 | ARID5A   | 3.13E-41 | -0.34002 | 0.126 | 0.196 | 5.88E-37 | Myeloid ce ARID5A   |
| 2017 | ADSL     | 3.35E-41 | -0.38416 | 0.253 | 0.308 | 6.30E-37 | Myeloid ce ADSL     |
| 2018 | TMEM63A  | 6.71E-41 | -0.26549 | 0.065 | 0.127 | 1.26E-36 | Myeloid ce TMEM63A  |
| 2019 | NUP107   | 1.36E-40 | -0.28239 | 0.074 | 0.136 | 2.55E-36 | Myeloid ce NUP107   |
| 2020 | MRT04    | 1.58E-40 | -0.26523 | 0.066 | 0.126 | 2.97E-36 | Myeloid ce MRT04    |

|      |           |          |          |       |       |          |                         |
|------|-----------|----------|----------|-------|-------|----------|-------------------------|
| 2021 | PPP2R1A   | 1.80E-40 | -0.33757 | 0.45  | 0.471 | 3.38E-36 | Myeloid ce PPP2R1A      |
| 2022 | MCM7      | 2.18E-40 | -0.31501 | 0.073 | 0.135 | 4.09E-36 | Myeloid ce MCM7         |
| 2023 | PMS2      | 5.53E-40 | -0.30426 | 0.097 | 0.161 | 1.04E-35 | Myeloid ce PMS2         |
| 2024 | FNTA      | 8.48E-40 | -0.35519 | 0.188 | 0.252 | 1.59E-35 | Myeloid ce FNTA         |
| 2025 | PPIH      | 9.83E-40 | -0.36275 | 0.183 | 0.245 | 1.85E-35 | Myeloid ce PPIH         |
| 2026 | SP140L    | 1.33E-39 | -0.33628 | 0.137 | 0.203 | 2.50E-35 | Myeloid ce SP140L       |
| 2027 | MFNG      | 2.17E-39 | -0.37569 | 0.287 | 0.336 | 4.07E-35 | Myeloid ce MFNG         |
| 2028 | GLOD4     | 3.23E-39 | -0.3641  | 0.189 | 0.249 | 6.07E-35 | Myeloid ce GLOD4        |
| 2029 | PDE4B     | 3.38E-39 | -0.33356 | 0.11  | 0.176 | 6.36E-35 | Myeloid ce PDE4B        |
| 2030 | SF3A3     | 3.81E-39 | -0.3429  | 0.2   | 0.261 | 7.15E-35 | Myeloid ce SF3A3        |
| 2031 | CRBN      | 5.31E-39 | -0.34734 | 0.197 | 0.26  | 9.97E-35 | Myeloid ce CRBN         |
| 2032 | NOLC1     | 5.39E-39 | -0.28949 | 0.091 | 0.154 | 1.01E-34 | Myeloid ce NOLC1        |
| 2033 | ITFG2     | 5.93E-39 | -0.3181  | 0.1   | 0.163 | 1.11E-34 | Myeloid ce ITFG2        |
| 2034 | PDE7A     | 5.96E-39 | -0.25229 | 0.055 | 0.113 | 1.12E-34 | Myeloid ce PDE7A        |
| 2035 | PIGC      | 7.02E-39 | -0.34587 | 0.175 | 0.236 | 1.32E-34 | Myeloid ce PIGC         |
| 2036 | ELP2      | 8.59E-39 | -0.29089 | 0.091 | 0.153 | 1.61E-34 | Myeloid ce ELP2         |
| 2037 | CCDC85B   | 8.78E-39 | -0.35029 | 0.442 | 0.468 | 1.65E-34 | Myeloid ce CCDC85B      |
| 2038 | EPB41L4A- | 1.47E-38 | -0.33055 | 0.121 | 0.185 | 2.75E-34 | Myeloid ce EPB41L4A-AS1 |
| 2039 | MAPRE2    | 1.63E-38 | -0.36782 | 0.145 | 0.207 | 3.07E-34 | Myeloid ce MAPRE2       |
| 2040 | TRMT112   | 1.68E-38 | -0.25666 | 0.681 | 0.674 | 3.15E-34 | Myeloid ce TRMT112      |
| 2041 | BLCAP     | 2.83E-38 | -0.36919 | 0.174 | 0.236 | 5.32E-34 | Myeloid ce BLCAP        |
| 2042 | FDFT1     | 2.88E-38 | -0.36679 | 0.341 | 0.383 | 5.41E-34 | Myeloid ce FDFT1        |
| 2043 | MRPS27    | 3.03E-38 | -0.26882 | 0.078 | 0.139 | 5.69E-34 | Myeloid ce MRPS27       |
| 2044 | SELENOF   | 5.28E-38 | -0.35935 | 0.438 | 0.46  | 9.91E-34 | Myeloid ce SELENOF      |
| 2045 | MAGED2    | 5.34E-38 | -0.35414 | 0.166 | 0.227 | 1.00E-33 | Myeloid ce MAGED2       |
| 2046 | CD37      | 6.54E-38 | -0.86473 | 0.907 | 0.89  | 1.23E-33 | Myeloid ce CD37         |
| 2047 | TMC6      | 7.21E-38 | -0.35917 | 0.264 | 0.321 | 1.35E-33 | Myeloid ce TMC6         |
| 2048 | RBM48     | 8.46E-38 | -0.27175 | 0.066 | 0.124 | 1.59E-33 | Myeloid ce RBM48        |
| 2049 | DIMT1     | 1.11E-37 | -0.28506 | 0.09  | 0.15  | 2.09E-33 | Myeloid ce DIMT1        |
| 2050 | YDJC      | 1.31E-37 | -0.34114 | 0.172 | 0.235 | 2.47E-33 | Myeloid ce YDJC         |
| 2051 | RUBCNL    | 1.61E-37 | -0.41159 | 0.077 | 0.135 | 3.03E-33 | Myeloid ce RUBCNL       |
| 2052 | FNBP4     | 2.42E-37 | -0.35834 | 0.244 | 0.301 | 4.55E-33 | Myeloid ce FNBP4        |
| 2053 | PMPCB     | 2.51E-37 | -0.35424 | 0.234 | 0.289 | 4.71E-33 | Myeloid ce PMPCB        |
| 2054 | SRSF1     | 3.90E-37 | -0.36775 | 0.245 | 0.299 | 7.32E-33 | Myeloid ce SRSF1        |
| 2055 | HSPB1     | 4.52E-37 | -0.25736 | 0.421 | 0.472 | 8.49E-33 | Myeloid ce HSPB1        |
| 2056 | SMARCE1   | 6.79E-37 | -0.34428 | 0.193 | 0.252 | 1.28E-32 | Myeloid ce SMARCE1      |
| 2057 | ACAT2     | 7.74E-37 | -0.28038 | 0.087 | 0.147 | 1.45E-32 | Myeloid ce ACAT2        |
| 2058 | RAB29     | 8.30E-37 | -0.34816 | 0.123 | 0.184 | 1.56E-32 | Myeloid ce RAB29        |
| 2059 | ACTR1B    | 1.22E-36 | -0.29241 | 0.099 | 0.159 | 2.30E-32 | Myeloid ce ACTR1B       |
| 2060 | METTL5    | 1.53E-36 | -0.34305 | 0.231 | 0.285 | 2.87E-32 | Myeloid ce METTL5       |
| 2061 | SCRN2     | 1.71E-36 | -0.27704 | 0.092 | 0.153 | 3.21E-32 | Myeloid ce SCRN2        |
| 2062 | CRELD1    | 2.03E-36 | -0.26708 | 0.064 | 0.119 | 3.82E-32 | Myeloid ce CRELD1       |
| 2063 | ASNSD1    | 2.38E-36 | -0.29631 | 0.106 | 0.167 | 4.47E-32 | Myeloid ce ASNSD1       |
| 2064 | SUCLG2    | 2.74E-36 | -0.30057 | 0.113 | 0.173 | 5.14E-32 | Myeloid ce SUCLG2       |
| 2065 | PPHLN1    | 3.17E-36 | -0.29965 | 0.128 | 0.191 | 5.95E-32 | Myeloid ce PPHLN1       |
| 2066 | PWP1      | 4.55E-36 | -0.36135 | 0.198 | 0.253 | 8.54E-32 | Myeloid ce PWP1         |
| 2067 | PPP2R5C   | 5.80E-36 | -0.39185 | 0.152 | 0.214 | 1.09E-31 | Myeloid ce PPP2R5C      |



|      |          |          |          |       |       |          |                     |
|------|----------|----------|----------|-------|-------|----------|---------------------|
| 2068 | MHENCN   | 6.46E-36 | -0.27143 | 0.076 | 0.135 | 1.21E-31 | Myeloid ce MHENCN   |
| 2069 | NASP     | 6.67E-36 | -0.3503  | 0.18  | 0.24  | 1.25E-31 | Myeloid ce NASP     |
| 2070 | HMGA1    | 7.16E-36 | -0.35653 | 0.192 | 0.25  | 1.35E-31 | Myeloid ce HMGA1    |
| 2071 | PCMTD2   | 3.27E-35 | -0.27121 | 0.078 | 0.135 | 6.14E-31 | Myeloid ce PCMTD2   |
| 2072 | SEC62    | 3.68E-35 | -0.3352  | 0.518 | 0.526 | 6.92E-31 | Myeloid ce SEC62    |
| 2073 | ENOPH1   | 3.90E-35 | -0.30208 | 0.115 | 0.173 | 7.32E-31 | Myeloid ce ENOPH1   |
| 2074 | NIFK     | 6.34E-35 | -0.35462 | 0.226 | 0.278 | 1.19E-30 | Myeloid ce NIFK     |
| 2075 | CNOT7    | 1.57E-34 | -0.35148 | 0.332 | 0.367 | 2.96E-30 | Myeloid ce CNOT7    |
| 2076 | CLK1     | 1.60E-34 | -0.35184 | 0.149 | 0.209 | 3.01E-30 | Myeloid ce CLK1     |
| 2077 | MIB2     | 2.62E-34 | -0.26261 | 0.061 | 0.115 | 4.91E-30 | Myeloid ce MIB2     |
| 2078 | EMD      | 2.83E-34 | -0.34376 | 0.369 | 0.399 | 5.31E-30 | Myeloid ce EMD      |
| 2079 | THAP7    | 2.97E-34 | -0.32879 | 0.136 | 0.193 | 5.57E-30 | Myeloid ce THAP7    |
| 2080 | RNF125   | 3.63E-34 | -0.28409 | 0.091 | 0.149 | 6.81E-30 | Myeloid ce RNF125   |
| 2081 | COQ8A    | 4.11E-34 | -0.26379 | 0.081 | 0.137 | 7.72E-30 | Myeloid ce COQ8A    |
| 2082 | SMARCB1  | 4.80E-34 | -0.38033 | 0.281 | 0.323 | 9.02E-30 | Myeloid ce SMARCB1  |
| 2083 | ZNF32    | 8.83E-34 | -0.31476 | 0.125 | 0.183 | 1.66E-29 | Myeloid ce ZNF32    |
| 2084 | RBBP4    | 1.54E-33 | -0.35086 | 0.303 | 0.346 | 2.89E-29 | Myeloid ce RBBP4    |
| 2085 | SRSF10   | 2.51E-33 | -0.35147 | 0.332 | 0.367 | 4.72E-29 | Myeloid ce SRSF10   |
| 2086 | ACTR6    | 4.58E-33 | -0.27334 | 0.086 | 0.141 | 8.61E-29 | Myeloid ce ACTR6    |
| 2087 | ABRAXAS1 | 6.77E-33 | -0.2733  | 0.076 | 0.129 | 1.27E-28 | Myeloid ce ABRAXAS1 |
| 2088 | IL2RG    | 9.00E-33 | -0.29167 | 0.09  | 0.148 | 1.69E-28 | Myeloid ce IL2RG    |
| 2089 | NSUN5    | 1.67E-32 | -0.3306  | 0.17  | 0.226 | 3.14E-28 | Myeloid ce NSUN5    |
| 2090 | AGPAT5   | 2.16E-32 | -0.25182 | 0.051 | 0.1   | 4.05E-28 | Myeloid ce AGPAT5   |
| 2091 | POP5     | 2.59E-32 | -0.32758 | 0.176 | 0.231 | 4.86E-28 | Myeloid ce POP5     |
| 2092 | WDR6     | 4.48E-32 | -0.25947 | 0.091 | 0.147 | 8.41E-28 | Myeloid ce WDR6     |
| 2093 | CYLD     | 4.78E-32 | -0.33587 | 0.201 | 0.257 | 8.98E-28 | Myeloid ce CYLD     |
| 2094 | SNRNP40  | 6.14E-32 | -0.33409 | 0.2   | 0.251 | 1.15E-27 | Myeloid ce SNRNP40  |
| 2095 | IP6K2    | 1.04E-31 | -0.32146 | 0.142 | 0.198 | 1.96E-27 | Myeloid ce IP6K2    |
| 2096 | CCDC66   | 1.09E-31 | -0.25042 | 0.07  | 0.123 | 2.05E-27 | Myeloid ce CCDC66   |
| 2097 | VPS51    | 1.38E-31 | -0.30647 | 0.215 | 0.271 | 2.58E-27 | Myeloid ce VPS51    |
| 2098 | KMT2E    | 1.39E-31 | -0.33972 | 0.43  | 0.451 | 2.62E-27 | Myeloid ce KMT2E    |
| 2099 | DUSP2    | 1.55E-31 | -0.60692 | 0.088 | 0.143 | 2.92E-27 | Myeloid ce DUSP2    |
| 2100 | BLOC1S4  | 2.16E-31 | -0.28882 | 0.099 | 0.153 | 4.06E-27 | Myeloid ce BLOC1S4  |
| 2101 | PPWD1    | 2.92E-31 | -0.27777 | 0.105 | 0.16  | 5.48E-27 | Myeloid ce PPWD1    |
| 2102 | MAML2    | 3.13E-31 | -0.29369 | 0.11  | 0.167 | 5.89E-27 | Myeloid ce MAML2    |
| 2103 | MAF1     | 4.76E-31 | -0.34101 | 0.376 | 0.402 | 8.93E-27 | Myeloid ce MAF1     |
| 2104 | PHB      | 4.99E-31 | -0.31114 | 0.33  | 0.364 | 9.38E-27 | Myeloid ce PHB      |
| 2105 | ELOVL5   | 5.89E-31 | -0.36065 | 0.251 | 0.297 | 1.11E-26 | Myeloid ce ELOVL5   |
| 2106 | IL6ST    | 6.56E-31 | -0.317   | 0.126 | 0.184 | 1.23E-26 | Myeloid ce IL6ST    |
| 2107 | ZC3HAV1  | 6.98E-31 | -0.30938 | 0.215 | 0.271 | 1.31E-26 | Myeloid ce ZC3HAV1  |
| 2108 | DIP2A    | 7.86E-31 | -0.28846 | 0.089 | 0.142 | 1.48E-26 | Myeloid ce DIP2A    |
| 2109 | TRAP1    | 8.68E-31 | -0.27727 | 0.096 | 0.148 | 1.63E-26 | Myeloid ce TRAP1    |
| 2110 | DOCK10   | 5.38E-30 | -0.28874 | 0.114 | 0.168 | 1.01E-25 | Myeloid ce DOCK10   |
| 2111 | CACYBP   | 5.69E-30 | -0.32096 | 0.352 | 0.38  | 1.07E-25 | Myeloid ce CACYBP   |
| 2112 | ZNF800   | 5.76E-30 | -0.32711 | 0.181 | 0.232 | 1.08E-25 | Myeloid ce ZNF800   |
| 2113 | NDUFA5   | 7.87E-30 | -0.32983 | 0.271 | 0.312 | 1.48E-25 | Myeloid ce NDUFA5   |
| 2114 | ZNF430   | 9.23E-30 | -0.25278 | 0.083 | 0.135 | 1.73E-25 | Myeloid ce ZNF430   |

|      |          |          |          |       |       |          |                        |
|------|----------|----------|----------|-------|-------|----------|------------------------|
| 2115 | PTPN22   | 1.32E-29 | -0.25753 | 0.079 | 0.131 | 2.48E-25 | Myeloid ce PTPN22      |
| 2116 | GIMAP6   | 1.52E-29 | -0.32845 | 0.125 | 0.177 | 2.85E-25 | Myeloid ce GIMAP6      |
| 2117 | ARL14EP  | 1.61E-29 | -0.28172 | 0.126 | 0.18  | 3.02E-25 | Myeloid ce ARL14EP     |
| 2118 | BZW2     | 1.61E-29 | -0.29878 | 0.14  | 0.192 | 3.02E-25 | Myeloid ce BZW2        |
| 2119 | STRAP    | 2.09E-29 | -0.31883 | 0.345 | 0.371 | 3.94E-25 | Myeloid ce STRAP       |
| 2120 | CYTH1    | 2.53E-29 | -0.3299  | 0.308 | 0.348 | 4.75E-25 | Myeloid ce CYTH1       |
| 2121 | LUC7L2   | 2.55E-29 | -0.32627 | 0.202 | 0.251 | 4.80E-25 | Myeloid ce LUC7L2      |
| 2122 | DDX18    | 2.57E-29 | -0.33343 | 0.36  | 0.388 | 4.82E-25 | Myeloid ce DDX18       |
| 2123 | C9orf16  | 2.78E-29 | -0.26138 | 0.614 | 0.593 | 5.23E-25 | Myeloid ce C9orf16     |
| 2124 | THUMPD3  | 3.59E-29 | -0.31103 | 0.149 | 0.203 | 6.74E-25 | Myeloid ce THUMPD3-AS1 |
| 2125 | POLR3GL  | 4.04E-29 | -0.33418 | 0.235 | 0.281 | 7.59E-25 | Myeloid ce POLR3GL     |
| 2126 | NUAK2    | 4.15E-29 | -0.27665 | 0.09  | 0.142 | 7.80E-25 | Myeloid ce NUAK2       |
| 2127 | SCOC     | 5.70E-29 | -0.28159 | 0.103 | 0.154 | 1.07E-24 | Myeloid ce SCOC        |
| 2128 | CAMK2D   | 7.26E-29 | -0.2803  | 0.07  | 0.119 | 1.36E-24 | Myeloid ce CAMK2D      |
| 2129 | ERGIC2   | 8.19E-29 | -0.30079 | 0.15  | 0.201 | 1.54E-24 | Myeloid ce ERGIC2      |
| 2130 | SSRP1    | 9.81E-29 | -0.30626 | 0.171 | 0.221 | 1.84E-24 | Myeloid ce SSRP1       |
| 2131 | RNF126   | 1.26E-28 | -0.31551 | 0.177 | 0.228 | 2.37E-24 | Myeloid ce RNF126      |
| 2132 | HADH     | 1.75E-28 | -0.25392 | 0.081 | 0.13  | 3.29E-24 | Myeloid ce HADH        |
| 2133 | RASSF7   | 1.83E-28 | -0.29395 | 0.128 | 0.181 | 3.43E-24 | Myeloid ce RASSF7      |
| 2134 | ZNF131   | 1.96E-28 | -0.25723 | 0.087 | 0.137 | 3.68E-24 | Myeloid ce ZNF131      |
| 2135 | PRKRA    | 3.29E-28 | -0.2841  | 0.118 | 0.169 | 6.18E-24 | Myeloid ce PRKRA       |
| 2136 | CLNS1A   | 4.21E-28 | -0.30145 | 0.383 | 0.407 | 7.90E-24 | Myeloid ce CLNS1A      |
| 2137 | ANAPC5   | 4.30E-28 | -0.31592 | 0.301 | 0.336 | 8.08E-24 | Myeloid ce ANAPC5      |
| 2138 | DKC1     | 4.43E-28 | -0.26649 | 0.1   | 0.15  | 8.32E-24 | Myeloid ce DKC1        |
| 2139 | MRPL39   | 6.13E-28 | -0.26854 | 0.091 | 0.14  | 1.15E-23 | Myeloid ce MRPL39      |
| 2140 | HOXB2    | 6.88E-28 | -0.29625 | 0.082 | 0.129 | 1.29E-23 | Myeloid ce HOXB2       |
| 2141 | NT5C     | 7.75E-28 | -0.38485 | 0.355 | 0.379 | 1.46E-23 | Myeloid ce NT5C        |
| 2142 | UBLCP1   | 9.62E-28 | -0.30544 | 0.179 | 0.229 | 1.81E-23 | Myeloid ce UBLCP1      |
| 2143 | DMAC1    | 1.10E-27 | -0.30458 | 0.152 | 0.203 | 2.08E-23 | Myeloid ce DMAC1       |
| 2144 | ALOX5AP  | 1.13E-27 | 0.614013 | 0.413 | 0.354 | 2.12E-23 | Myeloid ce ALOX5AP     |
| 2145 | RNF113A  | 1.64E-27 | -0.3081  | 0.164 | 0.213 | 3.08E-23 | Myeloid ce RNF113A     |
| 2146 | TATDN1   | 2.22E-27 | -0.30169 | 0.129 | 0.18  | 4.17E-23 | Myeloid ce TATDN1      |
| 2147 | YTHDF2   | 2.49E-27 | -0.3043  | 0.279 | 0.316 | 4.67E-23 | Myeloid ce YTHDF2      |
| 2148 | ANKRD10  | 2.53E-27 | -0.32676 | 0.214 | 0.261 | 4.74E-23 | Myeloid ce ANKRD10     |
| 2149 | ARHGAP45 | 3.20E-27 | -0.31342 | 0.37  | 0.399 | 6.02E-23 | Myeloid ce ARHGAP45    |
| 2150 | C16orf74 | 3.62E-27 | -0.27927 | 0.067 | 0.114 | 6.79E-23 | Myeloid ce C16orf74    |
| 2151 | SPCS2    | 3.62E-27 | -0.34876 | 0.41  | 0.42  | 6.80E-23 | Myeloid ce SPCS2       |
| 2152 | MRPS31   | 3.97E-27 | -0.28978 | 0.117 | 0.168 | 7.46E-23 | Myeloid ce MRPS31      |
| 2153 | CBLL1    | 4.95E-27 | -0.26726 | 0.097 | 0.146 | 9.30E-23 | Myeloid ce CBLL1       |
| 2154 | ABT1     | 4.97E-27 | -0.31073 | 0.201 | 0.245 | 9.34E-23 | Myeloid ce ABT1        |
| 2155 | NOA1     | 5.44E-27 | -0.27111 | 0.124 | 0.173 | 1.02E-22 | Myeloid ce NOA1        |
| 2156 | NDUFV1   | 5.57E-27 | -0.31361 | 0.332 | 0.361 | 1.05E-22 | Myeloid ce NDUFV1      |
| 2157 | RANGRF   | 7.10E-27 | -0.29584 | 0.147 | 0.197 | 1.33E-22 | Myeloid ce RANGRF      |
| 2158 | OMA1     | 8.35E-27 | -0.25498 | 0.083 | 0.131 | 1.57E-22 | Myeloid ce OMA1        |
| 2159 | TCEA1    | 8.44E-27 | -0.28008 | 0.493 | 0.492 | 1.59E-22 | Myeloid ce TCEA1       |
| 2160 | TMEM35B  | 1.14E-26 | -0.31332 | 0.135 | 0.183 | 2.15E-22 | Myeloid ce TMEM35B     |
| 2161 | ICAM2    | 1.54E-26 | -0.28147 | 0.354 | 0.393 | 2.89E-22 | Myeloid ce ICAM2       |

|      |          |          |          |       |       |          |                     |
|------|----------|----------|----------|-------|-------|----------|---------------------|
| 2162 | FTSJ1    | 4.29E-26 | -0.25791 | 0.111 | 0.159 | 8.05E-22 | Myeloid ce FTSJ1    |
| 2163 | ALDH9A1  | 6.52E-26 | -0.30206 | 0.17  | 0.217 | 1.23E-21 | Myeloid ce ALDH9A1  |
| 2164 | CENPC    | 7.08E-26 | -0.25665 | 0.105 | 0.154 | 1.33E-21 | Myeloid ce CENPC    |
| 2165 | SPTAN1   | 1.65E-25 | -0.28065 | 0.151 | 0.202 | 3.10E-21 | Myeloid ce SPTAN1   |
| 2166 | SDAD1    | 1.69E-25 | -0.28418 | 0.157 | 0.204 | 3.17E-21 | Myeloid ce SDAD1    |
| 2167 | CHD2     | 1.84E-25 | -0.29098 | 0.18  | 0.231 | 3.46E-21 | Myeloid ce CHD2     |
| 2168 | ACADM    | 2.00E-25 | -0.28947 | 0.129 | 0.177 | 3.76E-21 | Myeloid ce ACADM    |
| 2169 | PDIA4    | 2.35E-25 | -0.35123 | 0.184 | 0.227 | 4.41E-21 | Myeloid ce PDIA4    |
| 2170 | UPF3A    | 2.67E-25 | -0.28803 | 0.159 | 0.208 | 5.01E-21 | Myeloid ce UPF3A    |
| 2171 | PDCD2    | 3.08E-25 | -0.30661 | 0.238 | 0.277 | 5.78E-21 | Myeloid ce PDCD2    |
| 2172 | RASGRP2  | 3.84E-25 | -0.2967  | 0.523 | 0.525 | 7.21E-21 | Myeloid ce RASGRP2  |
| 2173 | EIF3I    | 5.93E-25 | -0.28593 | 0.417 | 0.425 | 1.11E-20 | Myeloid ce EIF3I    |
| 2174 | LMAN1    | 7.44E-25 | -0.31822 | 0.153 | 0.197 | 1.40E-20 | Myeloid ce LMAN1    |
| 2175 | EIF2A    | 1.12E-24 | -0.3291  | 0.259 | 0.293 | 2.10E-20 | Myeloid ce EIF2A    |
| 2176 | FIP1L1   | 1.12E-24 | -0.28663 | 0.159 | 0.205 | 2.11E-20 | Myeloid ce FIP1L1   |
| 2177 | TOMM20   | 1.42E-24 | -0.29093 | 0.462 | 0.463 | 2.67E-20 | Myeloid ce TOMM20   |
| 2178 | PYURF    | 1.63E-24 | -0.28787 | 0.422 | 0.432 | 3.06E-20 | Myeloid ce PYURF    |
| 2179 | SPSB3    | 1.78E-24 | -0.30138 | 0.397 | 0.415 | 3.35E-20 | Myeloid ce SPSB3    |
| 2180 | FPGS     | 1.81E-24 | -0.27389 | 0.123 | 0.169 | 3.41E-20 | Myeloid ce FPGS     |
| 2181 | MRPS6    | 1.91E-24 | -0.31327 | 0.347 | 0.372 | 3.59E-20 | Myeloid ce MRPS6    |
| 2182 | LUC7L3   | 2.30E-24 | -0.30567 | 0.38  | 0.403 | 4.31E-20 | Myeloid ce LUC7L3   |
| 2183 | METTL17  | 3.33E-24 | -0.26893 | 0.136 | 0.184 | 6.25E-20 | Myeloid ce METTL17  |
| 2184 | RASSF5   | 3.72E-24 | -0.31629 | 0.274 | 0.31  | 6.98E-20 | Myeloid ce RASSF5   |
| 2185 | DEGS1    | 3.83E-24 | -0.31416 | 0.18  | 0.224 | 7.20E-20 | Myeloid ce DEGS1    |
| 2186 | THUMPD1  | 3.88E-24 | -0.25028 | 0.117 | 0.164 | 7.30E-20 | Myeloid ce THUMPD1  |
| 2187 | TVP23B   | 4.16E-24 | -0.26319 | 0.098 | 0.143 | 7.81E-20 | Myeloid ce TVP23B   |
| 2188 | U2AF1L4  | 4.20E-24 | -0.2765  | 0.139 | 0.186 | 7.89E-20 | Myeloid ce U2AF1L4  |
| 2189 | CLK4     | 4.66E-24 | -0.2687  | 0.102 | 0.147 | 8.76E-20 | Myeloid ce CLK4     |
| 2190 | RAB37    | 5.62E-24 | -0.28846 | 0.112 | 0.159 | 1.06E-19 | Myeloid ce RAB37    |
| 2191 | PLRG1    | 8.32E-24 | -0.2667  | 0.123 | 0.168 | 1.56E-19 | Myeloid ce PLRG1    |
| 2192 | VBP1     | 9.52E-24 | -0.27135 | 0.168 | 0.213 | 1.79E-19 | Myeloid ce VBP1     |
| 2193 | NUTF2    | 1.13E-23 | -0.30499 | 0.346 | 0.367 | 2.12E-19 | Myeloid ce NUTF2    |
| 2194 | SYVN1    | 1.27E-23 | -0.27633 | 0.095 | 0.14  | 2.38E-19 | Myeloid ce SYVN1    |
| 2195 | TMED4    | 1.58E-23 | -0.31452 | 0.231 | 0.268 | 2.97E-19 | Myeloid ce TMED4    |
| 2196 | SUMF2    | 1.75E-23 | -0.26758 | 0.141 | 0.187 | 3.29E-19 | Myeloid ce SUMF2    |
| 2197 | EIF4E    | 1.81E-23 | -0.31406 | 0.196 | 0.236 | 3.41E-19 | Myeloid ce EIF4E    |
| 2198 | SP100    | 1.89E-23 | -0.33346 | 0.48  | 0.472 | 3.55E-19 | Myeloid ce SP100    |
| 2199 | SRSF11   | 2.83E-23 | -0.28907 | 0.409 | 0.422 | 5.32E-19 | Myeloid ce SRSF11   |
| 2200 | HDAC2    | 2.86E-23 | -0.30927 | 0.228 | 0.265 | 5.37E-19 | Myeloid ce HDAC2    |
| 2201 | N4BP2L2  | 3.75E-23 | -0.27278 | 0.484 | 0.487 | 7.04E-19 | Myeloid ce N4BP2L2  |
| 2202 | RPN2     | 6.60E-23 | -0.28663 | 0.413 | 0.422 | 1.24E-18 | Myeloid ce RPN2     |
| 2203 | RBBP6    | 7.16E-23 | -0.25247 | 0.134 | 0.181 | 1.34E-18 | Myeloid ce RBBP6    |
| 2204 | CCDC107  | 7.27E-23 | -0.37117 | 0.254 | 0.283 | 1.37E-18 | Myeloid ce CCDC107  |
| 2205 | PRELID3B | 7.35E-23 | -0.26036 | 0.141 | 0.187 | 1.38E-18 | Myeloid ce PRELID3B |
| 2206 | TSR2     | 9.67E-23 | -0.28395 | 0.151 | 0.194 | 1.82E-18 | Myeloid ce TSR2     |
| 2207 | SSBP1    | 1.57E-22 | -0.25213 | 0.499 | 0.492 | 2.96E-18 | Myeloid ce SSBP1    |
| 2208 | DHPS     | 1.58E-22 | -0.3214  | 0.286 | 0.315 | 2.98E-18 | Myeloid ce DHPS     |

|      |          |          |          |       |       |          |                     |
|------|----------|----------|----------|-------|-------|----------|---------------------|
| 2209 | LMBRD1   | 1.87E-22 | -0.32595 | 0.259 | 0.293 | 3.51E-18 | Myeloid ce LMBRD1   |
| 2210 | EXOSC5   | 2.56E-22 | -0.28759 | 0.16  | 0.202 | 4.82E-18 | Myeloid ce EXOSC5   |
| 2211 | BCAS2    | 4.83E-22 | -0.27838 | 0.149 | 0.191 | 9.07E-18 | Myeloid ce BCAS2    |
| 2212 | TMEM230  | 8.14E-22 | -0.28339 | 0.387 | 0.399 | 1.53E-17 | Myeloid ce TMEM230  |
| 2213 | HARS     | 9.87E-22 | -0.26293 | 0.13  | 0.172 | 1.85E-17 | Myeloid ce HARS     |
| 2214 | HAX1     | 2.36E-21 | -0.30363 | 0.354 | 0.366 | 4.44E-17 | Myeloid ce HAX1     |
| 2215 | MRPL9    | 3.28E-21 | -0.28604 | 0.185 | 0.224 | 6.16E-17 | Myeloid ce MRPL9    |
| 2216 | MRPL3    | 4.34E-21 | -0.28748 | 0.213 | 0.248 | 8.15E-17 | Myeloid ce MRPL3    |
| 2217 | RELA     | 4.51E-21 | -0.2649  | 0.177 | 0.217 | 8.48E-17 | Myeloid ce RELA     |
| 2218 | REST     | 4.86E-21 | -0.2782  | 0.153 | 0.193 | 9.14E-17 | Myeloid ce REST     |
| 2219 | CUTC     | 4.89E-21 | -0.25549 | 0.149 | 0.192 | 9.18E-17 | Myeloid ce CUTC     |
| 2220 | MZT2B    | 5.80E-21 | -0.31028 | 0.251 | 0.289 | 1.09E-16 | Myeloid ce MZT2B    |
| 2221 | IKZF1    | 6.89E-21 | -0.28334 | 0.34  | 0.366 | 1.30E-16 | Myeloid ce IKZF1    |
| 2222 | MBNL1    | 7.29E-21 | -0.28815 | 0.479 | 0.476 | 1.37E-16 | Myeloid ce MBNL1    |
| 2223 | NBDY     | 1.02E-20 | -0.30628 | 0.208 | 0.244 | 1.91E-16 | Myeloid ce NBDY     |
| 2224 | ILF3-DT  | 1.13E-20 | -0.26859 | 0.133 | 0.175 | 2.13E-16 | Myeloid ce ILF3-DT  |
| 2225 | PAFAH1B3 | 1.23E-20 | -0.2556  | 0.143 | 0.185 | 2.31E-16 | Myeloid ce PAFAH1B3 |
| 2226 | MRPL46   | 2.10E-20 | -0.25022 | 0.11  | 0.15  | 3.94E-16 | Myeloid ce MRPL46   |
| 2227 | ARMH1    | 2.18E-20 | -0.27958 | 0.153 | 0.197 | 4.09E-16 | Myeloid ce ARMH1    |
| 2228 | SNRPA1   | 2.57E-20 | -0.31242 | 0.243 | 0.273 | 4.83E-16 | Myeloid ce SNRPA1   |
| 2229 | HSP90B1  | 4.43E-20 | -0.38071 | 0.5   | 0.505 | 8.32E-16 | Myeloid ce HSP90B1  |
| 2230 | TSEN15   | 4.47E-20 | -0.25415 | 0.132 | 0.172 | 8.39E-16 | Myeloid ce TSEN15   |
| 2231 | OXLD1    | 6.25E-20 | -0.28974 | 0.231 | 0.264 | 1.17E-15 | Myeloid ce OXLD1    |
| 2232 | TBC1D10A | 6.83E-20 | -0.28071 | 0.161 | 0.199 | 1.28E-15 | Myeloid ce TBC1D10A |
| 2233 | LETMD1   | 6.88E-20 | -0.27812 | 0.168 | 0.207 | 1.29E-15 | Myeloid ce LETMD1   |
| 2234 | RGS10    | 8.89E-20 | -0.36288 | 0.565 | 0.527 | 1.67E-15 | Myeloid ce RGS10    |
| 2235 | SIGIRR   | 9.34E-20 | -0.32776 | 0.394 | 0.398 | 1.75E-15 | Myeloid ce SIGIRR   |
| 2236 | XAB2     | 1.31E-19 | -0.26327 | 0.164 | 0.203 | 2.46E-15 | Myeloid ce XAB2     |
| 2237 | ARHGEF3  | 1.45E-19 | -0.26301 | 0.12  | 0.159 | 2.72E-15 | Myeloid ce ARHGEF3  |
| 2238 | KIAA1551 | 1.53E-19 | -0.27525 | 0.244 | 0.282 | 2.87E-15 | Myeloid ce KIAA1551 |
| 2239 | SBDS     | 2.44E-19 | -0.26209 | 0.154 | 0.193 | 4.59E-15 | Myeloid ce SBDS     |
| 2240 | NELFCD   | 2.88E-19 | -0.28247 | 0.162 | 0.198 | 5.41E-15 | Myeloid ce NELFCD   |
| 2241 | DPF2     | 3.78E-19 | -0.25376 | 0.137 | 0.175 | 7.10E-15 | Myeloid ce DPF2     |
| 2242 | HNRNPH3  | 6.67E-19 | -0.28527 | 0.384 | 0.391 | 1.25E-14 | Myeloid ce HNRNPH3  |
| 2243 | OLA1     | 7.71E-19 | -0.28118 | 0.293 | 0.312 | 1.45E-14 | Myeloid ce OLA1     |
| 2244 | RGL4     | 8.68E-19 | 0.493066 | 0.147 | 0.11  | 1.63E-14 | Myeloid ce RGL4     |
| 2245 | POLR2C   | 9.40E-19 | -0.27162 | 0.186 | 0.221 | 1.77E-14 | Myeloid ce POLR2C   |
| 2246 | ING4     | 9.68E-19 | -0.28697 | 0.18  | 0.215 | 1.82E-14 | Myeloid ce ING4     |
| 2247 | SYNRG    | 1.12E-18 | -0.2559  | 0.174 | 0.214 | 2.10E-14 | Myeloid ce SYNRG    |
| 2248 | MAT2A    | 1.13E-18 | -0.29798 | 0.223 | 0.256 | 2.11E-14 | Myeloid ce MAT2A    |
| 2249 | DPP7     | 1.20E-18 | -0.26135 | 0.467 | 0.462 | 2.25E-14 | Myeloid ce DPP7     |
| 2250 | TTC14    | 1.42E-18 | -0.25025 | 0.15  | 0.19  | 2.68E-14 | Myeloid ce TTC14    |
| 2251 | DNPH1    | 3.46E-18 | -0.26913 | 0.228 | 0.262 | 6.49E-14 | Myeloid ce DNPH1    |
| 2252 | INO80E   | 3.93E-18 | -0.28764 | 0.252 | 0.28  | 7.38E-14 | Myeloid ce INO80E   |
| 2253 | PYCR2    | 1.08E-17 | -0.25236 | 0.114 | 0.15  | 2.02E-13 | Myeloid ce PYCR2    |
| 2254 | NONO     | 1.83E-17 | -0.28361 | 0.293 | 0.313 | 3.45E-13 | Myeloid ce NONO     |
| 2255 | DDOST    | 1.91E-17 | -0.27518 | 0.445 | 0.439 | 3.59E-13 | Myeloid ce DDOST    |

|      |          |          |          |       |       |          |                     |
|------|----------|----------|----------|-------|-------|----------|---------------------|
| 2256 | CEP57    | 2.35E-17 | -0.2588  | 0.178 | 0.213 | 4.42E-13 | Myeloid ce CEP57    |
| 2257 | PDIA3    | 2.70E-17 | -0.27233 | 0.508 | 0.509 | 5.06E-13 | Myeloid ce PDIA3    |
| 2258 | MRPL24   | 6.91E-17 | -0.27497 | 0.183 | 0.215 | 1.30E-12 | Myeloid ce MRPL24   |
| 2259 | WBP11    | 7.23E-17 | -0.25612 | 0.168 | 0.201 | 1.36E-12 | Myeloid ce WBP11    |
| 2260 | RNF167   | 7.27E-17 | -0.30103 | 0.349 | 0.358 | 1.37E-12 | Myeloid ce RNF167   |
| 2261 | CLPP     | 8.01E-17 | -0.28181 | 0.263 | 0.286 | 1.50E-12 | Myeloid ce CLPP     |
| 2262 | ATRX     | 8.94E-17 | -0.26955 | 0.295 | 0.319 | 1.68E-12 | Myeloid ce ATRX     |
| 2263 | CHTF8    | 1.11E-16 | -0.27591 | 0.192 | 0.224 | 2.09E-12 | Myeloid ce CHTF8    |
| 2264 | RNF138   | 1.75E-16 | -0.25688 | 0.168 | 0.201 | 3.28E-12 | Myeloid ce RNF138   |
| 2265 | TAP1     | 2.10E-16 | -0.2763  | 0.354 | 0.369 | 3.94E-12 | Myeloid ce TAP1     |
| 2266 | WDR33    | 2.19E-16 | -0.27433 | 0.194 | 0.225 | 4.12E-12 | Myeloid ce WDR33    |
| 2267 | TBCC     | 2.78E-16 | -0.2526  | 0.133 | 0.167 | 5.23E-12 | Myeloid ce TBCC     |
| 2268 | APOBEC3G | 4.88E-16 | -0.42648 | 0.198 | 0.223 | 9.17E-12 | Myeloid ce APOBEC3G |
| 2269 | NME4     | 5.89E-16 | -0.25097 | 0.163 | 0.197 | 1.11E-11 | Myeloid ce NME4     |
| 2270 | HSPA5    | 7.93E-16 | -0.35605 | 0.392 | 0.391 | 1.49E-11 | Myeloid ce HSPA5    |
| 2271 | RP9      | 1.05E-15 | -0.25712 | 0.116 | 0.15  | 1.98E-11 | Myeloid ce RP9      |
| 2272 | TES      | 1.50E-15 | -0.27347 | 0.259 | 0.284 | 2.81E-11 | Myeloid ce TES      |
| 2273 | BBX      | 3.02E-15 | -0.2593  | 0.148 | 0.18  | 5.67E-11 | Myeloid ce BBX      |
| 2274 | SSB      | 3.05E-15 | -0.26455 | 0.41  | 0.403 | 5.72E-11 | Myeloid ce SSB      |
| 2275 | RPL22L1  | 3.87E-15 | -0.28849 | 0.477 | 0.462 | 7.27E-11 | Myeloid ce RPL22L1  |
| 2276 | MANF     | 5.19E-15 | -0.26869 | 0.124 | 0.156 | 9.75E-11 | Myeloid ce MANF     |
| 2277 | PIK3R1   | 5.74E-15 | -0.2747  | 0.169 | 0.2   | 1.08E-10 | Myeloid ce PIK3R1   |
| 2278 | CCDC32   | 7.97E-15 | -0.2618  | 0.131 | 0.163 | 1.50E-10 | Myeloid ce CCDC32   |
| 2279 | DNMT1    | 8.09E-15 | -0.27419 | 0.189 | 0.217 | 1.52E-10 | Myeloid ce DNMT1    |
| 2280 | RPAIN    | 8.26E-15 | -0.28527 | 0.238 | 0.26  | 1.55E-10 | Myeloid ce RPAIN    |
| 2281 | EWSR1    | 8.99E-15 | -0.2573  | 0.397 | 0.397 | 1.69E-10 | Myeloid ce EWSR1    |
| 2282 | CYB5A    | 1.05E-14 | -0.278   | 0.161 | 0.19  | 1.98E-10 | Myeloid ce CYB5A    |
| 2283 | DAP3     | 1.30E-14 | -0.26427 | 0.271 | 0.29  | 2.44E-10 | Myeloid ce DAP3     |
| 2284 | SSBP2    | 1.51E-14 | -0.27265 | 0.103 | 0.133 | 2.83E-10 | Myeloid ce SSBP2    |
| 2285 | ARL2BP   | 1.78E-14 | -0.26406 | 0.216 | 0.24  | 3.34E-10 | Myeloid ce ARL2BP   |
| 2286 | BZW1     | 2.07E-14 | -0.2719  | 0.362 | 0.366 | 3.89E-10 | Myeloid ce BZW1     |
| 2287 | HBB      | 2.59E-14 | -2.52851 | 0.117 | 0.083 | 4.86E-10 | Myeloid ce HBB      |
| 2288 | IFT57    | 3.06E-14 | -0.27325 | 0.121 | 0.152 | 5.76E-10 | Myeloid ce IFT57    |
| 2289 | HLA-DQA1 | 3.29E-14 | -0.67435 | 0.27  | 0.279 | 6.19E-10 | Myeloid ce HLA-DQA1 |
| 2290 | MORC3    | 4.29E-14 | -0.25426 | 0.165 | 0.195 | 8.05E-10 | Myeloid ce MORC3    |
| 2291 | TINF2    | 4.83E-14 | -0.28776 | 0.25  | 0.268 | 9.07E-10 | Myeloid ce TINF2    |
| 2292 | DCXR     | 4.85E-14 | -0.27662 | 0.425 | 0.416 | 9.10E-10 | Myeloid ce DCXR     |
| 2293 | DCTPP1   | 6.10E-14 | -0.25681 | 0.143 | 0.172 | 1.15E-09 | Myeloid ce DCTPP1   |
| 2294 | SLC25A39 | 7.02E-14 | -0.29855 | 0.271 | 0.286 | 1.32E-09 | Myeloid ce SLC25A39 |
| 2295 | TIAL1    | 8.29E-14 | -0.26534 | 0.281 | 0.297 | 1.56E-09 | Myeloid ce TIAL1    |
| 2296 | ST3GAL1  | 1.02E-13 | -0.25939 | 0.171 | 0.199 | 1.92E-09 | Myeloid ce ST3GAL1  |
| 2297 | NAXE     | 1.03E-13 | -0.26853 | 0.262 | 0.28  | 1.94E-09 | Myeloid ce NAXE     |
| 2298 | TRPT1    | 1.54E-13 | -0.28333 | 0.188 | 0.212 | 2.89E-09 | Myeloid ce TRPT1    |
| 2299 | GIMAP2   | 1.59E-13 | -0.29619 | 0.226 | 0.247 | 2.99E-09 | Myeloid ce GIMAP2   |
| 2300 | PPIE     | 1.65E-13 | -0.25212 | 0.184 | 0.21  | 3.09E-09 | Myeloid ce PPIE     |
| 2301 | AASDHPPT | 1.66E-13 | -0.25616 | 0.186 | 0.212 | 3.12E-09 | Myeloid ce AASDHPPT |
| 2302 | SLC50A1  | 5.11E-13 | -0.2733  | 0.146 | 0.174 | 9.60E-09 | Myeloid ce SLC50A1  |

|      |           |          |          |       |       |          |                    |
|------|-----------|----------|----------|-------|-------|----------|--------------------|
| 2303 | IMP4      | 5.30E-13 | -0.25332 | 0.21  | 0.233 | 9.95E-09 | Myeloid ce IMP4    |
| 2304 | NDFIP1    | 6.58E-13 | -0.2877  | 0.467 | 0.443 | 1.24E-08 | Myeloid ce NDFIP1  |
| 2305 | SUN2      | 8.94E-13 | -0.28768 | 0.271 | 0.288 | 1.68E-08 | Myeloid ce SUN2    |
| 2306 | KHDRBS1   | 2.55E-12 | -0.28912 | 0.269 | 0.285 | 4.79E-08 | Myeloid ce KHDRBS1 |
| 2307 | ZNF24     | 2.64E-12 | -0.2551  | 0.248 | 0.265 | 4.96E-08 | Myeloid ce ZNF24   |
| 2308 | THYN1     | 3.23E-12 | -0.25263 | 0.256 | 0.271 | 6.07E-08 | Myeloid ce THYN1   |
| 2309 | PDAP1     | 4.50E-12 | -0.26131 | 0.275 | 0.287 | 8.44E-08 | Myeloid ce PDAP1   |
| 2310 | CD40      | 4.84E-12 | -0.4396  | 0.134 | 0.157 | 9.09E-08 | Myeloid ce CD40    |
| 2311 | SARS      | 1.39E-11 | -0.25599 | 0.288 | 0.297 | 2.60E-07 | Myeloid ce SARS    |
| 2312 | LYAR      | 4.89E-11 | -0.42103 | 0.144 | 0.166 | 9.18E-07 | Myeloid ce LYAR    |
| 2313 | LHPP      | 4.98E-11 | -0.28684 | 0.137 | 0.162 | 9.35E-07 | Myeloid ce LHPP    |
| 2314 | TCP1      | 6.39E-11 | -0.25203 | 0.266 | 0.276 | 1.20E-06 | Myeloid ce TCP1    |
| 2315 | TPR       | 8.74E-10 | -0.27582 | 0.398 | 0.387 | 1.64E-05 | Myeloid ce TPR     |
| 2316 | HVCN1     | 1.65E-09 | -0.73232 | 0.297 | 0.282 | 3.10E-05 | Myeloid ce HVCN1   |
| 2317 | PLEKHF2   | 5.31E-09 | -0.29293 | 0.155 | 0.174 | 9.98E-05 | Myeloid ce PLEKHF2 |
| 2318 | RANBP1    | 7.10E-09 | -0.25094 | 0.318 | 0.314 | 0.000133 | Myeloid ce RANBP1  |
| 2319 | DUT       | 4.19E-08 | -0.25705 | 0.379 | 0.362 | 0.000787 | Myeloid ce DUT     |
| 2324 | SPINK2    | 0        | 2.774978 | 0.825 | 0.014 | 0        | Hematopo SPINK2    |
| 2325 | EGFL7     | 0        | 2.293253 | 0.762 | 0.006 | 0        | Hematopo EGFL7     |
| 2326 | PRSS57    | 0        | 2.225047 | 0.73  | 0.005 | 0        | Hematopo PRSS57    |
| 2327 | PRSS2     | 0        | 1.939628 | 0.159 | 0     | 0        | Hematopo PRSS2     |
| 2328 | SMIM24    | 0        | 1.871315 | 0.746 | 0.003 | 0        | Hematopo SMIM24    |
| 2329 | CD34      | 0        | 1.74631  | 0.667 | 0     | 0        | Hematopo CD34      |
| 2330 | C1QTNF4   | 0        | 1.689862 | 0.444 | 0     | 0        | Hematopo C1QTNF4   |
| 2331 | AVP       | 0        | 1.622064 | 0.413 | 0     | 0        | Hematopo AVP       |
| 2332 | CYTL1     | 0        | 1.418353 | 0.524 | 0.001 | 0        | Hematopo CYTL1     |
| 2333 | CRHBP     | 0        | 1.411596 | 0.492 | 0     | 0        | Hematopo CRHBP     |
| 2334 | MDK       | 0        | 1.297448 | 0.46  | 0.005 | 0        | Hematopo MDK       |
| 2335 | HOXA9     | 0        | 1.168232 | 0.413 | 0.002 | 0        | Hematopo HOXA9     |
| 2336 | LINC02573 | 0        | 1.051215 | 0.397 | 0     | 0        | Hematopo LINC02573 |
| 2337 | FLT3      | 0        | 0.953353 | 0.413 | 0.005 | 0        | Hematopo FLT3      |
| 2338 | TFPI      | 0        | 0.802542 | 0.397 | 0.002 | 0        | Hematopo TFPI      |
| 2339 | IGLL1     | 0        | 0.781779 | 0.286 | 0     | 0        | Hematopo IGLL1     |
| 2340 | HOXA10    | 0        | 0.775198 | 0.365 | 0.003 | 0        | Hematopo HOXA10    |
| 2341 | GATA2     | 0        | 0.771788 | 0.286 | 0.001 | 0        | Hematopo GATA2     |
| 2342 | FSCN1     | 0        | 0.739891 | 0.413 | 0.005 | 0        | Hematopo FSCN1     |
| 2343 | MSRB3     | 0        | 0.728375 | 0.397 | 0.002 | 0        | Hematopo MSRB3     |
| 2344 | BAALC     | 0        | 0.725848 | 0.381 | 0.001 | 0        | Hematopo BAALC     |
| 2345 | NPR3      | 0        | 0.723165 | 0.317 | 0     | 0        | Hematopo NPR3      |
| 2346 | CPA3      | 0        | 0.70811  | 0.222 | 0     | 0        | Hematopo CPA3      |
| 2347 | HPGDS     | 0        | 0.689125 | 0.206 | 0.001 | 0        | Hematopo HPGDS     |
| 2348 | HACD1     | 0        | 0.684428 | 0.397 | 0.006 | 0        | Hematopo HACD1     |
| 2349 | BPMS      | 0        | 0.618108 | 0.286 | 0.001 | 0        | Hematopo BPMS      |
| 2350 | ADGRG6    | 0        | 0.594435 | 0.254 | 0     | 0        | Hematopo ADGRG6    |
| 2351 | EMP1      | 0        | 0.580604 | 0.238 | 0.002 | 0        | Hematopo EMP1      |
| 2352 | TCTEX1D1  | 0        | 0.557334 | 0.238 | 0.001 | 0        | Hematopo TCTEX1D1  |
| 2353 | BEX1      | 0        | 0.544299 | 0.175 | 0.001 | 0        | Hematopo BEX1      |

|                |           |          |       |       |           |                     |
|----------------|-----------|----------|-------|-------|-----------|---------------------|
| 2354 AC002454. | 0         | 0.536802 | 0.206 | 0     | 0         | Hematopo AC002454.1 |
| 2355 PROM1     | 0         | 0.529567 | 0.222 | 0     | 0         | Hematopo PROM1      |
| 2356 HOXA7     | 0         | 0.521124 | 0.206 | 0     | 0         | Hematopo HOXA7      |
| 2357 TM4SF1    | 0         | 0.430466 | 0.143 | 0     | 0         | Hematopo TM4SF1     |
| 2358 ERG       | 0         | 0.392126 | 0.222 | 0     | 0         | Hematopo ERG        |
| 2359 AC016735. | 0         | 0.391771 | 0.175 | 0     | 0         | Hematopo AC016735.1 |
| 2360 MFAP2     | 0         | 0.388928 | 0.143 | 0     | 0         | Hematopo MFAP2      |
| 2361 CRYGD     | 0         | 0.378793 | 0.175 | 0     | 0         | Hematopo CRYGD      |
| 2362 SCHIP1    | 0         | 0.365524 | 0.159 | 0     | 0         | Hematopo SCHIP1     |
| 2363 ITGA9     | 0         | 0.284682 | 0.127 | 0     | 0         | Hematopo ITGA9      |
| 2364 TMEM136   | 0         | 0.284034 | 0.127 | 0     | 0         | Hematopo TMEM136    |
| 2365 CACNB2    | 0         | 0.254334 | 0.111 | 0     | 0         | Hematopo CACNB2     |
| 2366 SELENOP   | 0         | 0.250194 | 0.127 | 0     | 0         | Hematopo SELENOP    |
| 2367 KCNK17    | 8.34E-305 | 0.692283 | 0.19  | 0.001 | 1.57E-300 | Hematopo KCNK17     |
| 2368 IL1B.1    | 6.91E-278 | 1.232008 | 0.54  | 0.013 | 1.30E-273 | Hematopo IL1B       |
| 2369 CPXM1     | 3.39E-275 | 0.577635 | 0.302 | 0.004 | 6.37E-271 | Hematopo CPXM1      |
| 2370 DYTN      | 1.89E-245 | 0.261037 | 0.111 | 0.001 | 3.55E-241 | Hematopo DYTN       |
| 2371 RAC3      | 2.01E-239 | 0.36385  | 0.175 | 0.001 | 3.77E-235 | Hematopo RAC3       |
| 2372 MAP7      | 3.02E-237 | 0.570639 | 0.302 | 0.005 | 5.67E-233 | Hematopo MAP7       |
| 2373 PLOD2     | 1.17E-230 | 0.287783 | 0.127 | 0.001 | 2.19E-226 | Hematopo PLOD2      |
| 2374 TSC22D1   | 1.80E-222 | 1.557963 | 0.667 | 0.025 | 3.39E-218 | Hematopo TSC22D1    |
| 2375 GATA1     | 4.47E-222 | 0.572851 | 0.175 | 0.002 | 8.39E-218 | Hematopo GATA1      |
| 2376 CHST13    | 1.76E-217 | 0.509935 | 0.286 | 0.005 | 3.31E-213 | Hematopo CHST13     |
| 2377 LRRC70    | 1.06E-214 | 0.603406 | 0.27  | 0.004 | 2.00E-210 | Hematopo LRRC70     |
| 2378 REXO5     | 3.01E-209 | 0.346513 | 0.206 | 0.002 | 5.66E-205 | Hematopo REXO5      |
| 2379 TCEAL9    | 2.33E-206 | 0.525071 | 0.365 | 0.008 | 4.37E-202 | Hematopo TCEAL9     |
| 2380 CFH       | 1.69E-205 | 0.287287 | 0.159 | 0.001 | 3.17E-201 | Hematopo CFH        |
| 2381 CMBL      | 3.70E-199 | 0.395954 | 0.206 | 0.003 | 6.94E-195 | Hematopo CMBL       |
| 2382 RAB13     | 3.85E-195 | 0.988056 | 0.508 | 0.017 | 7.23E-191 | Hematopo RAB13      |
| 2383 IL18.1    | 2.30E-194 | 1.073597 | 0.508 | 0.017 | 4.32E-190 | Hematopo IL18       |
| 2384 EREG      | 4.37E-184 | 0.332255 | 0.175 | 0.002 | 8.22E-180 | Hematopo EREG       |
| 2385 ANKRD28   | 9.45E-184 | 1.486971 | 0.635 | 0.028 | 1.78E-179 | Hematopo ANKRD28    |
| 2386 C8orf88   | 2.03E-168 | 0.69608  | 0.413 | 0.013 | 3.81E-164 | Hematopo C8orf88    |
| 2387 LAPTM4B   | 5.04E-164 | 0.540583 | 0.286 | 0.006 | 9.46E-160 | Hematopo LAPTM4B    |
| 2388 FHL2      | 3.08E-162 | 0.409085 | 0.254 | 0.005 | 5.79E-158 | Hematopo FHL2       |
| 2389 SERPING1  | 2.34E-161 | 0.691094 | 0.365 | 0.01  | 4.40E-157 | Hematopo SERPING1   |
| 2390 ATP8B4    | 1.60E-155 | 0.853817 | 0.381 | 0.012 | 3.00E-151 | Hematopo ATP8B4     |
| 2391 XXYLT1-AS | 4.32E-153 | 0.333711 | 0.19  | 0.003 | 8.11E-149 | Hematopo XXYLT1-AS2 |
| 2392 MMRN1     | 8.87E-150 | 0.503716 | 0.19  | 0.003 | 1.67E-145 | Hematopo MMRN1      |
| 2393 AL157895. | 1.86E-143 | 0.627505 | 0.111 | 0.001 | 3.49E-139 | Hematopo AL157895.1 |
| 2394 SH3D21    | 4.29E-138 | 0.253706 | 0.175 | 0.003 | 8.05E-134 | Hematopo SH3D21     |
| 2395 GFI1B     | 3.78E-137 | 0.306365 | 0.19  | 0.003 | 7.10E-133 | Hematopo GFI1B      |
| 2396 MAP1A     | 1.12E-135 | 0.489696 | 0.222 | 0.005 | 2.11E-131 | Hematopo MAP1A      |
| 2397 MTURN     | 3.92E-132 | 0.404156 | 0.254 | 0.006 | 7.37E-128 | Hematopo MTURN      |
| 2398 GUCY1B1   | 2.39E-131 | 0.508687 | 0.317 | 0.01  | 4.49E-127 | Hematopo GUCY1B1    |
| 2399 DNNT      | 6.41E-131 | 1.142165 | 0.111 | 0.001 | 1.20E-126 | Hematopo DNNT       |
| 2400 EPDR1     | 3.11E-129 | 0.304726 | 0.175 | 0.003 | 5.84E-125 | Hematopo EPDR1      |

|      |            |           |          |       |       |           |                     |
|------|------------|-----------|----------|-------|-------|-----------|---------------------|
| 2401 | KLF1       | 1.17E-128 | 0.420988 | 0.143 | 0.002 | 2.21E-124 | Hematopo KLF1       |
| 2402 | AC084033.3 | 3.61E-126 | 1.854426 | 0.714 | 0.053 | 6.78E-122 | Hematopo AC084033.3 |
| 2403 | GUCY1A1    | 2.06E-124 | 0.331216 | 0.222 | 0.005 | 3.87E-120 | Hematopo GUCY1A1    |
| 2404 | GNA15.1    | 1.95E-122 | 0.911774 | 0.444 | 0.02  | 3.66E-118 | Hematopo GNA15      |
| 2405 | H1FO       | 3.59E-122 | 0.956269 | 0.413 | 0.018 | 6.74E-118 | Hematopo H1FO       |
| 2406 | DEPP1      | 6.51E-122 | 0.612047 | 0.159 | 0.003 | 1.22E-117 | Hematopo DEPP1      |
| 2407 | AKR1C3     | 2.77E-120 | 0.996669 | 0.571 | 0.033 | 5.21E-116 | Hematopo AKR1C3     |
| 2408 | FRMD4B     | 3.04E-119 | 0.640347 | 0.381 | 0.015 | 5.71E-115 | Hematopo FRMD4B     |
| 2409 | BCAT1      | 6.71E-119 | 0.527605 | 0.333 | 0.012 | 1.26E-114 | Hematopo BCAT1      |
| 2410 | SNCA       | 3.33E-117 | 0.655312 | 0.413 | 0.018 | 6.26E-113 | Hematopo SNCA       |
| 2411 | PBX1       | 5.89E-116 | 0.26741  | 0.127 | 0.002 | 1.11E-111 | Hematopo PBX1       |
| 2412 | MYB        | 1.50E-113 | 0.491173 | 0.238 | 0.006 | 2.82E-109 | Hematopo MYB        |
| 2413 | PLTP       | 5.41E-113 | 0.403319 | 0.222 | 0.006 | 1.02E-108 | Hematopo PLTP       |
| 2414 | TNFSF4     | 2.35E-112 | 0.360208 | 0.159 | 0.003 | 4.42E-108 | Hematopo TNFSF4     |
| 2415 | FHL1       | 3.04E-110 | 1.013569 | 0.492 | 0.027 | 5.71E-106 | Hematopo FHL1       |
| 2416 | PRELID2    | 3.40E-110 | 0.257847 | 0.19  | 0.004 | 6.39E-106 | Hematopo PRELID2    |
| 2417 | SCARF1     | 1.43E-109 | 0.29099  | 0.127 | 0.002 | 2.68E-105 | Hematopo SCARF1     |
| 2418 | IGFBP7.1   | 4.95E-105 | 1.326685 | 0.698 | 0.056 | 9.29E-101 | Hematopo IGFBP7     |
| 2419 | IGF2BP2    | 1.04E-101 | 0.406811 | 0.19  | 0.005 | 1.95E-97  | Hematopo IGF2BP2    |
| 2420 | MBOAT7.1   | 1.21E-98  | 1.313988 | 0.683 | 0.057 | 2.27E-94  | Hematopo MBOAT7     |
| 2421 | ALDH1A1    | 1.10E-97  | 0.610737 | 0.254 | 0.008 | 2.06E-93  | Hematopo ALDH1A1    |
| 2422 | FAM30A.1   | 3.89E-97  | 2.471056 | 0.841 | 0.093 | 7.31E-93  | Hematopo FAM30A     |
| 2423 | AC026369.3 | 2.94E-94  | 0.526634 | 0.19  | 0.005 | 5.51E-90  | Hematopo AC026369.3 |
| 2424 | DPY19L2    | 4.28E-91  | 0.475295 | 0.222 | 0.007 | 8.04E-87  | Hematopo DPY19L2    |
| 2425 | ZNRF1      | 6.85E-91  | 0.431269 | 0.238 | 0.008 | 1.29E-86  | Hematopo ZNRF1      |
| 2426 | NECTIN2    | 4.95E-90  | 0.398878 | 0.222 | 0.007 | 9.29E-86  | Hematopo NECTIN2    |
| 2427 | SLC27A2    | 8.38E-90  | 0.366277 | 0.159 | 0.004 | 1.57E-85  | Hematopo SLC27A2    |
| 2428 | SAMD13     | 2.15E-89  | 0.311937 | 0.159 | 0.004 | 4.05E-85  | Hematopo SAMD13     |
| 2429 | DEPTOR     | 4.01E-89  | 0.304965 | 0.206 | 0.006 | 7.53E-85  | Hematopo DEPTOR     |
| 2430 | NPDC1      | 2.05E-88  | 1.643461 | 0.571 | 0.046 | 3.85E-84  | Hematopo NPDC1      |
| 2431 | SOX4       | 6.06E-87  | 2.045409 | 0.825 | 0.101 | 1.14E-82  | Hematopo SOX4       |
| 2432 | NPW        | 3.11E-86  | 0.275715 | 0.127 | 0.002 | 5.84E-82  | Hematopo NPW        |
| 2433 | HEMGN      | 6.13E-86  | 0.719525 | 0.349 | 0.017 | 1.15E-81  | Hematopo HEMGN      |
| 2434 | ZNF436-AS  | 7.23E-85  | 0.332335 | 0.19  | 0.005 | 1.36E-80  | Hematopo ZNF436-AS1 |
| 2435 | GNAI1      | 2.22E-83  | 0.467958 | 0.254 | 0.01  | 4.17E-79  | Hematopo GNAI1      |
| 2436 | ZNF711     | 4.65E-83  | 0.317547 | 0.19  | 0.006 | 8.73E-79  | Hematopo ZNF711     |
| 2437 | IL17RE     | 2.10E-80  | 0.272488 | 0.127 | 0.003 | 3.95E-76  | Hematopo IL17RE     |
| 2438 | NFE2.1     | 9.10E-79  | 1.238355 | 0.635 | 0.06  | 1.71E-74  | Hematopo NFE2       |
| 2439 | CAVIN2     | 1.25E-77  | 0.339516 | 0.27  | 0.012 | 2.34E-73  | Hematopo CAVIN2     |
| 2440 | LINC02470  | 5.22E-77  | 0.370996 | 0.206 | 0.007 | 9.81E-73  | Hematopo LINC02470  |
| 2441 | AC246787.2 | 1.64E-76  | 0.540891 | 0.286 | 0.013 | 3.08E-72  | Hematopo AC246787.2 |
| 2442 | CALCRL     | 2.06E-76  | 0.616627 | 0.206 | 0.007 | 3.87E-72  | Hematopo CALCRL     |
| 2443 | MGST2.1    | 6.80E-75  | 1.05123  | 0.571 | 0.052 | 1.28E-70  | Hematopo MGST2      |
| 2444 | MEST       | 6.76E-72  | 0.710743 | 0.381 | 0.025 | 1.27E-67  | Hematopo MEST       |
| 2445 | NREP       | 1.71E-71  | 0.75872  | 0.508 | 0.042 | 3.21E-67  | Hematopo NREP       |
| 2446 | DPPA4      | 2.55E-71  | 0.480293 | 0.206 | 0.008 | 4.79E-67  | Hematopo DPPA4      |
| 2447 | MGLL       | 3.93E-71  | 0.520955 | 0.286 | 0.014 | 7.38E-67  | Hematopo MGLL       |



|                |          |          |       |       |                               |
|----------------|----------|----------|-------|-------|-------------------------------|
| 2448 PTMS      | 1.07E-70 | 0.97229  | 0.46  | 0.036 | 2.00E-66 Hematopo PTMS        |
| 2449 GNG11     | 6.00E-70 | 0.822184 | 0.397 | 0.027 | 1.13E-65 Hematopo GNG11       |
| 2450 ARMCX1    | 1.16E-69 | 0.344599 | 0.175 | 0.006 | 2.18E-65 Hematopo ARMCX1      |
| 2451 RAMP1     | 1.78E-69 | 0.763134 | 0.27  | 0.013 | 3.35E-65 Hematopo RAMP1       |
| 2452 ARHGAP22  | 6.12E-69 | 0.333385 | 0.127 | 0.003 | 1.15E-64 Hematopo ARHGAP22    |
| 2453 ALG1L2    | 7.98E-63 | 0.292767 | 0.175 | 0.006 | 1.50E-58 Hematopo ALG1L2      |
| 2454 FBXW9     | 1.40E-62 | 0.485974 | 0.302 | 0.018 | 2.64E-58 Hematopo FBXW9       |
| 2455 CD109     | 1.67E-61 | 0.358029 | 0.127 | 0.003 | 3.15E-57 Hematopo CD109       |
| 2456 ZNF620    | 7.73E-61 | 0.323923 | 0.159 | 0.005 | 1.45E-56 Hematopo ZNF620      |
| 2457 AL359504. | 8.32E-61 | 0.583369 | 0.302 | 0.018 | 1.56E-56 Hematopo AL359504.2  |
| 2458 C11orf74  | 1.34E-60 | 0.583996 | 0.317 | 0.02  | 2.52E-56 Hematopo C11orf74    |
| 2459 TP53I3.1  | 2.13E-59 | 0.590388 | 0.365 | 0.027 | 3.99E-55 Hematopo TP53I3      |
| 2460 SOCS2     | 1.85E-58 | 1.148471 | 0.508 | 0.052 | 3.48E-54 Hematopo SOCS2       |
| 2461 ME3       | 8.11E-58 | 0.27754  | 0.175 | 0.007 | 1.52E-53 Hematopo ME3         |
| 2462 TCEAL4    | 1.33E-57 | 0.890941 | 0.571 | 0.064 | 2.49E-53 Hematopo TCEAL4      |
| 2463 SLC2A5    | 4.59E-57 | 1.064871 | 0.222 | 0.011 | 8.62E-53 Hematopo SLC2A5      |
| 2464 INKA1     | 4.38E-56 | 0.552737 | 0.349 | 0.026 | 8.24E-52 Hematopo INKA1       |
| 2465 FADS1     | 2.46E-55 | 0.357897 | 0.238 | 0.013 | 4.62E-51 Hematopo FADS1       |
| 2466 MYL6B     | 1.08E-54 | 0.910558 | 0.571 | 0.068 | 2.02E-50 Hematopo MYL6B       |
| 2467 DAPK1.1   | 7.84E-54 | 0.645116 | 0.333 | 0.025 | 1.47E-49 Hematopo DAPK1       |
| 2468 P2RX1.1   | 3.18E-53 | 0.691899 | 0.444 | 0.043 | 5.97E-49 Hematopo P2RX1       |
| 2469 PDE6G     | 3.80E-53 | 0.523827 | 0.286 | 0.019 | 7.15E-49 Hematopo PDE6G       |
| 2470 LMO2.1    | 4.06E-53 | 0.458364 | 0.317 | 0.023 | 7.63E-49 Hematopo LMO2        |
| 2471 IPO11     | 3.87E-52 | 0.630817 | 0.397 | 0.035 | 7.27E-48 Hematopo IPO11       |
| 2472 TSPAN2    | 1.34E-51 | 0.854581 | 0.413 | 0.039 | 2.52E-47 Hematopo TSPAN2      |
| 2473 CCDC171   | 7.64E-51 | 0.265576 | 0.159 | 0.006 | 1.44E-46 Hematopo CCDC171     |
| 2474 KIF9      | 1.28E-50 | 0.451688 | 0.302 | 0.022 | 2.41E-46 Hematopo KIF9        |
| 2475 JUP       | 2.47E-48 | 0.808616 | 0.508 | 0.059 | 4.64E-44 Hematopo JUP         |
| 2476 RAB34.1   | 2.90E-48 | 0.664726 | 0.381 | 0.036 | 5.45E-44 Hematopo RAB34       |
| 2477 GPSM2     | 1.85E-47 | 0.271896 | 0.159 | 0.007 | 3.47E-43 Hematopo GPSM2       |
| 2478 ICA1      | 2.77E-47 | 0.341184 | 0.206 | 0.011 | 5.20E-43 Hematopo ICA1        |
| 2479 APOA1     | 2.91E-47 | 0.310773 | 0.143 | 0.006 | 5.47E-43 Hematopo APOA1       |
| 2480 LMNA      | 1.37E-46 | 0.82791  | 0.254 | 0.017 | 2.58E-42 Hematopo LMNA        |
| 2481 DDAH2.1   | 1.28E-45 | 1.203586 | 0.81  | 0.156 | 2.40E-41 Hematopo DDAH2       |
| 2482 PLXND1    | 1.78E-45 | 0.404765 | 0.238 | 0.015 | 3.35E-41 Hematopo PLXND1      |
| 2483 NRIP1     | 1.87E-45 | 0.906945 | 0.413 | 0.044 | 3.51E-41 Hematopo NRIP1       |
| 2484 STMN1.1   | 3.26E-45 | 1.845723 | 0.968 | 0.279 | 6.12E-41 Hematopo STMN1       |
| 2485 CLDN15    | 1.30E-44 | 0.276559 | 0.19  | 0.01  | 2.44E-40 Hematopo CLDN15      |
| 2486 CDK6      | 1.42E-44 | 1.312564 | 0.619 | 0.099 | 2.66E-40 Hematopo CDK6        |
| 2487 FAM216A   | 1.55E-44 | 0.478411 | 0.365 | 0.034 | 2.92E-40 Hematopo FAM216A     |
| 2488 TMEM220   | 4.61E-44 | 0.456723 | 0.286 | 0.022 | 8.65E-40 Hematopo TMEM220     |
| 2489 SYNGR1    | 1.35E-42 | 0.71591  | 0.444 | 0.051 | 2.53E-38 Hematopo SYNGR1      |
| 2490 SNHG25    | 3.18E-41 | 0.777014 | 0.302 | 0.026 | 5.98E-37 Hematopo SNHG25      |
| 2491 MPST.1    | 4.65E-41 | 0.81653  | 0.556 | 0.082 | 8.73E-37 Hematopo MPST        |
| 2492 UBR5-AS1  | 6.36E-41 | 0.469866 | 0.302 | 0.026 | 1.19E-36 Hematopo UBR5-AS1    |
| 2493 AC009237. | 1.87E-40 | 0.260674 | 0.143 | 0.006 | 3.51E-36 Hematopo AC009237.14 |
| 2494 HOPX.1    | 2.15E-40 | 1.425571 | 0.651 | 0.11  | 4.05E-36 Hematopo HOPX        |

|                |          |          |       |       |          |                     |
|----------------|----------|----------|-------|-------|----------|---------------------|
| 2495 CREB3L4   | 4.65E-40 | 0.521836 | 0.333 | 0.032 | 8.74E-36 | Hematopo CREB3L4    |
| 2496 ETS2.1    | 5.02E-40 | 0.884365 | 0.46  | 0.059 | 9.43E-36 | Hematopo ETS2       |
| 2497 CDCA7     | 1.70E-39 | 0.601898 | 0.397 | 0.045 | 3.20E-35 | Hematopo CDCA7      |
| 2498 GCAT      | 3.53E-39 | 0.366145 | 0.159 | 0.008 | 6.64E-35 | Hematopo GCAT       |
| 2499 FANCL     | 8.24E-39 | 0.450199 | 0.302 | 0.028 | 1.55E-34 | Hematopo FANCL      |
| 2500 VSIG10    | 2.02E-38 | 0.262284 | 0.175 | 0.01  | 3.79E-34 | Hematopo VSIG10     |
| 2501 EBPL      | 5.89E-38 | 1.115582 | 0.825 | 0.182 | 1.11E-33 | Hematopo EBPL       |
| 2502 F2R       | 1.54E-37 | 0.33071  | 0.27  | 0.023 | 2.89E-33 | Hematopo F2R        |
| 2503 SPARC     | 2.82E-37 | 0.279338 | 0.19  | 0.012 | 5.29E-33 | Hematopo SPARC      |
| 2504 SLC45A3   | 1.12E-36 | 0.257025 | 0.111 | 0.004 | 2.10E-32 | Hematopo SLC45A3    |
| 2505 AL391069. | 1.66E-36 | 0.30122  | 0.206 | 0.014 | 3.12E-32 | Hematopo AL391069.3 |
| 2506 PCBD1.1   | 2.21E-36 | 0.807333 | 0.556 | 0.09  | 4.15E-32 | Hematopo PCBD1      |
| 2507 TXN.1     | 2.75E-36 | 1.81507  | 0.968 | 0.359 | 5.17E-32 | Hematopo TXN        |
| 2508 ISYNA1.1  | 4.48E-35 | 0.800925 | 0.571 | 0.094 | 8.41E-31 | Hematopo ISYNA1     |
| 2509 ROBO3     | 7.90E-35 | 0.309972 | 0.222 | 0.017 | 1.48E-30 | Hematopo ROBO3      |
| 2510 FZD6      | 1.93E-34 | 0.2671   | 0.143 | 0.008 | 3.62E-30 | Hematopo FZD6       |
| 2511 RNF130.1  | 3.97E-34 | 1.171978 | 0.73  | 0.153 | 7.45E-30 | Hematopo RNF130     |
| 2512 BEX3.1    | 7.65E-34 | 1.132651 | 0.762 | 0.181 | 1.44E-29 | Hematopo BEX3       |
| 2513 MMP28     | 9.22E-34 | 0.404755 | 0.222 | 0.018 | 1.73E-29 | Hematopo MMP28      |
| 2514 EFHC2     | 1.52E-33 | 0.285902 | 0.127 | 0.006 | 2.86E-29 | Hematopo EFHC2      |
| 2515 MGST1.1   | 1.93E-33 | 0.477188 | 0.333 | 0.037 | 3.62E-29 | Hematopo MGST1      |
| 2516 SMAD1     | 3.08E-33 | 0.393189 | 0.19  | 0.014 | 5.79E-29 | Hematopo SMAD1      |
| 2517 CKS2      | 5.42E-33 | 0.812009 | 0.524 | 0.087 | 1.02E-28 | Hematopo CKS2       |
| 2518 FABP5     | 1.71E-32 | 0.961609 | 0.54  | 0.095 | 3.22E-28 | Hematopo FABP5      |
| 2519 SMIM3.1   | 3.93E-32 | 0.453175 | 0.333 | 0.039 | 7.39E-28 | Hematopo SMIM3      |
| 2520 REC8      | 5.75E-32 | 0.60827  | 0.381 | 0.05  | 1.08E-27 | Hematopo REC8       |
| 2521 B2M.1     | 6.00E-32 | -1.2891  | 1     | 0.999 | 1.13E-27 | Hematopo B2M        |
| 2522 KRT18     | 6.85E-32 | 0.428705 | 0.175 | 0.012 | 1.29E-27 | Hematopo KRT18      |
| 2523 SERPINB6. | 9.32E-32 | 0.897595 | 0.635 | 0.126 | 1.75E-27 | Hematopo SERPINB6   |
| 2524 FAH       | 1.48E-31 | 0.320237 | 0.27  | 0.027 | 2.78E-27 | Hematopo FAH        |
| 2525 NAALADL1  | 3.63E-31 | 0.4659   | 0.381 | 0.05  | 6.81E-27 | Hematopo NAALADL1   |
| 2526 ZSCAN9    | 4.88E-31 | 0.297022 | 0.175 | 0.012 | 9.16E-27 | Hematopo ZSCAN9     |
| 2527 HYI       | 9.44E-31 | 0.425345 | 0.317 | 0.037 | 1.77E-26 | Hematopo HYI        |
| 2528 LRMDA.1   | 9.78E-31 | 0.322841 | 0.222 | 0.019 | 1.84E-26 | Hematopo LRMDA      |
| 2529 FIRRE     | 1.20E-30 | 0.251584 | 0.175 | 0.012 | 2.26E-26 | Hematopo FIRRE      |
| 2530 TMSB10.1  | 1.76E-30 | -1.4035  | 1     | 0.997 | 3.30E-26 | Hematopo TMSB10     |
| 2531 HLX       | 2.57E-30 | 0.740742 | 0.175 | 0.013 | 4.83E-26 | Hematopo HLX        |
| 2532 AL034397. | 1.13E-29 | 0.801074 | 0.476 | 0.079 | 2.12E-25 | Hematopo AL034397.3 |
| 2533 MAN2A2    | 2.28E-29 | 0.314359 | 0.27  | 0.028 | 4.28E-25 | Hematopo MAN2A2     |
| 2534 TMSB4X.1  | 3.72E-29 | -1.56439 | 1     | 0.998 | 6.99E-25 | Hematopo TMSB4X     |
| 2535 ITM2C     | 4.66E-29 | 1.403532 | 0.651 | 0.15  | 8.75E-25 | Hematopo ITM2C      |
| 2536 AIF1.1    | 5.61E-29 | 0.597008 | 0.937 | 0.286 | 1.05E-24 | Hematopo AIF1       |
| 2537 ORAI3.1   | 7.98E-29 | 0.648591 | 0.429 | 0.067 | 1.50E-24 | Hematopo ORAI3      |
| 2538 MIR155HG  | 1.03E-28 | 0.430021 | 0.302 | 0.036 | 1.94E-24 | Hematopo MIR155HG   |
| 2539 PLAGL1    | 1.87E-28 | 0.417083 | 0.254 | 0.026 | 3.51E-24 | Hematopo PLAGL1     |
| 2540 ZFAS1     | 4.85E-28 | 1.408709 | 0.984 | 0.583 | 9.11E-24 | Hematopo ZFAS1      |
| 2541 MZB1.1    | 5.95E-28 | 0.740698 | 0.587 | 0.119 | 1.12E-23 | Hematopo MZB1       |

|      |           |          |          |       |       |          |                    |
|------|-----------|----------|----------|-------|-------|----------|--------------------|
| 2542 | FAM117A   | 2.40E-27 | 0.494481 | 0.397 | 0.059 | 4.51E-23 | Hematopo FAM117A   |
| 2543 | SERPINB1. | 2.70E-27 | 1.876658 | 0.921 | 0.446 | 5.07E-23 | Hematopo SERPINB1  |
| 2544 | PPFIBP1   | 3.73E-27 | 0.261941 | 0.143 | 0.009 | 7.01E-23 | Hematopo PPFIBP1   |
| 2545 | RPS24.1   | 4.52E-27 | 0.952522 | 1     | 0.994 | 8.49E-23 | Hematopo RPS24     |
| 2546 | LTBR.1    | 4.94E-27 | 0.371635 | 0.317 | 0.041 | 9.27E-23 | Hematopo LTBR      |
| 2547 | AAMDC     | 5.66E-27 | 0.555889 | 0.286 | 0.034 | 1.06E-22 | Hematopo AAMDC     |
| 2548 | GSTA4     | 6.51E-27 | 0.25128  | 0.143 | 0.01  | 1.22E-22 | Hematopo GSTA4     |
| 2549 | CREG1.1   | 6.68E-27 | 0.675637 | 0.444 | 0.076 | 1.25E-22 | Hematopo CREG1     |
| 2550 | RPLP0.1   | 7.70E-27 | 1.005028 | 1     | 0.986 | 1.45E-22 | Hematopo RPLP0     |
| 2551 | HLA-E.1   | 8.01E-27 | -1.68458 | 0.81  | 0.957 | 1.50E-22 | Hematopo HLA-E     |
| 2552 | HLA-C     | 8.54E-27 | -1.74132 | 0.984 | 0.983 | 1.60E-22 | Hematopo HLA-C     |
| 2553 | TGFBRAP1  | 1.05E-26 | 0.341967 | 0.222 | 0.022 | 1.97E-22 | Hematopo TGFBRAP1  |
| 2554 | BTG1.1    | 1.36E-26 | -2.51945 | 0.413 | 0.882 | 2.55E-22 | Hematopo BTG1      |
| 2555 | ETV6.1    | 3.16E-26 | 0.419391 | 0.381 | 0.058 | 5.94E-22 | Hematopo ETV6      |
| 2556 | SERPINE2  | 3.51E-26 | 0.354494 | 0.333 | 0.045 | 6.59E-22 | Hematopo SERPINE2  |
| 2557 | RFX2      | 3.64E-26 | 0.331782 | 0.19  | 0.017 | 6.83E-22 | Hematopo RFX2      |
| 2558 | TRIM58    | 3.92E-26 | 0.259454 | 0.175 | 0.014 | 7.36E-22 | Hematopo TRIM58    |
| 2559 | RNF24.1   | 5.17E-26 | 0.39445  | 0.365 | 0.053 | 9.72E-22 | Hematopo RNF24     |
| 2560 | SSBP2.1   | 5.43E-26 | 0.622116 | 0.619 | 0.129 | 1.02E-21 | Hematopo SSBP2     |
| 2561 | GAPDH.1   | 1.31E-25 | 1.15786  | 1     | 0.902 | 2.46E-21 | Hematopo GAPDH     |
| 2562 | IMPDH2.1  | 1.55E-25 | 1.235317 | 0.921 | 0.384 | 2.91E-21 | Hematopo IMPDH2    |
| 2563 | PARVB.1   | 2.34E-25 | 0.54145  | 0.508 | 0.098 | 4.39E-21 | Hematopo PARVB     |
| 2564 | SLC39A3   | 3.16E-25 | 0.709702 | 0.429 | 0.076 | 5.94E-21 | Hematopo SLC39A3   |
| 2565 | SPATA20   | 3.57E-25 | 0.457354 | 0.413 | 0.068 | 6.70E-21 | Hematopo SPATA20   |
| 2566 | HINT1.1   | 4.43E-25 | 1.064386 | 1     | 0.914 | 8.32E-21 | Hematopo HINT1     |
| 2567 | BEX2.1    | 4.51E-25 | 0.768192 | 0.556 | 0.116 | 8.48E-21 | Hematopo BEX2      |
| 2568 | MTHFD2L   | 4.59E-25 | 0.538449 | 0.46  | 0.083 | 8.62E-21 | Hematopo MTHFD2L   |
| 2569 | GSTP1.1   | 5.22E-25 | 1.284831 | 0.968 | 0.53  | 9.81E-21 | Hematopo GSTP1     |
| 2570 | DBN1      | 8.63E-25 | 0.331633 | 0.222 | 0.023 | 1.62E-20 | Hematopo DBN1      |
| 2571 | NIPSNAP3/ | 1.56E-24 | 0.606112 | 0.429 | 0.077 | 2.93E-20 | Hematopo NIPSNAP3A |
| 2572 | SCCPDH    | 5.72E-24 | 0.636584 | 0.476 | 0.092 | 1.08E-19 | Hematopo SCCPDH    |
| 2573 | ENO1.1    | 1.49E-23 | 1.533828 | 0.952 | 0.644 | 2.80E-19 | Hematopo ENO1      |
| 2574 | CLDND2    | 1.65E-23 | 0.338136 | 0.159 | 0.013 | 3.10E-19 | Hematopo CLDND2    |
| 2575 | TEC       | 1.89E-23 | 0.251683 | 0.159 | 0.013 | 3.55E-19 | Hematopo TEC       |
| 2576 | NPM1.1    | 3.61E-23 | 1.045842 | 1     | 0.91  | 6.79E-19 | Hematopo NPM1      |
| 2577 | AMD1      | 3.87E-23 | 0.825471 | 0.635 | 0.157 | 7.26E-19 | Hematopo AMD1      |
| 2578 | ALDH2.1   | 4.63E-23 | 0.484277 | 0.349 | 0.055 | 8.70E-19 | Hematopo ALDH2     |
| 2579 | S100Z.1   | 5.93E-23 | 0.284288 | 0.19  | 0.019 | 1.11E-18 | Hematopo S100Z     |
| 2580 | MINPP1    | 8.66E-23 | 0.616516 | 0.302 | 0.044 | 1.63E-18 | Hematopo MINPP1    |
| 2581 | MLLT11    | 1.03E-22 | 0.427141 | 0.27  | 0.036 | 1.93E-18 | Hematopo MLLT11    |
| 2582 | NME4.1    | 1.17E-22 | 0.890257 | 0.698 | 0.192 | 2.21E-18 | Hematopo NME4      |
| 2583 | RPS4X.1   | 1.22E-22 | 0.76003  | 1     | 0.99  | 2.30E-18 | Hematopo RPS4X     |
| 2584 | DENND6B.  | 1.56E-22 | 0.595262 | 0.317 | 0.049 | 2.93E-18 | Hematopo DENND6B   |
| 2585 | GAMT.1    | 5.60E-22 | 0.489808 | 0.508 | 0.105 | 1.05E-17 | Hematopo GAMT      |
| 2586 | PLIN3.1   | 1.30E-21 | 0.591141 | 0.571 | 0.133 | 2.45E-17 | Hematopo PLIN3     |
| 2587 | MSI2      | 1.75E-21 | 0.511653 | 0.413 | 0.078 | 3.28E-17 | Hematopo MSI2      |
| 2588 | TRIQQ.1   | 1.98E-21 | 0.285809 | 0.19  | 0.02  | 3.73E-17 | Hematopo TRIQQ     |

|      |           |          |          |       |       |          |          |            |
|------|-----------|----------|----------|-------|-------|----------|----------|------------|
| 2589 | GADD45A   | 2.02E-21 | 0.304992 | 0.222 | 0.026 | 3.79E-17 | Hematopo | GADD45A    |
| 2590 | SRD5A3    | 2.09E-21 | 0.346157 | 0.27  | 0.037 | 3.93E-17 | Hematopo | SRD5A3     |
| 2591 | CYTOR.1   | 2.25E-21 | 0.632384 | 0.476 | 0.101 | 4.23E-17 | Hematopo | CYTOR      |
| 2592 | HLA-B     | 3.06E-21 | -1.21917 | 0.984 | 0.992 | 5.74E-17 | Hematopo | HLA-B      |
| 2593 | ESD       | 3.18E-21 | 0.946645 | 0.825 | 0.273 | 5.98E-17 | Hematopo | ESD        |
| 2594 | MPP1.1    | 3.67E-21 | 0.582841 | 0.46  | 0.096 | 6.89E-17 | Hematopo | MPP1       |
| 2595 | SPART     | 5.47E-21 | 0.331939 | 0.349 | 0.058 | 1.03E-16 | Hematopo | SPART      |
| 2596 | TALDO1.1  | 8.16E-21 | 1.105621 | 0.905 | 0.483 | 1.53E-16 | Hematopo | TALDO1     |
| 2597 | SPINT2    | 1.45E-20 | 1.067541 | 0.762 | 0.265 | 2.72E-16 | Hematopo | SPINT2     |
| 2598 | SMIM1     | 1.49E-20 | 0.271783 | 0.175 | 0.018 | 2.80E-16 | Hematopo | SMIM1      |
| 2599 | CARD19.1  | 1.58E-20 | 0.547695 | 0.444 | 0.091 | 2.97E-16 | Hematopo | CARD19     |
| 2600 | PAFAH1B3  | 1.69E-20 | 0.736841 | 0.667 | 0.18  | 3.18E-16 | Hematopo | PAFAH1B3   |
| 2601 | VANGL1    | 1.82E-20 | 0.262942 | 0.143 | 0.012 | 3.42E-16 | Hematopo | VANGL1     |
| 2602 | H2AFY.1   | 1.84E-20 | 1.02387  | 0.841 | 0.324 | 3.46E-16 | Hematopo | H2AFY      |
| 2603 | KDM5B     | 2.15E-20 | 0.469829 | 0.381 | 0.07  | 4.03E-16 | Hematopo | KDM5B      |
| 2604 | AK3       | 2.15E-20 | 0.619418 | 0.476 | 0.104 | 4.05E-16 | Hematopo | AK3        |
| 2605 | HSP90AB1  | 2.33E-20 | 1.058793 | 1     | 0.842 | 4.37E-16 | Hematopo | HSP90AB1   |
| 2606 | FAM213A   | 3.18E-20 | 0.327505 | 0.254 | 0.035 | 5.97E-16 | Hematopo | FAM213A    |
| 2607 | GLUL.1    | 5.74E-20 | 0.718387 | 0.635 | 0.17  | 1.08E-15 | Hematopo | GLUL       |
| 2608 | YWHAE.1   | 6.86E-20 | 0.936473 | 0.778 | 0.262 | 1.29E-15 | Hematopo | YWHAE      |
| 2609 | LIMS1.1   | 7.95E-20 | 0.843301 | 0.556 | 0.141 | 1.49E-15 | Hematopo | LIMS1      |
| 2610 | RCN1      | 1.36E-19 | 0.26638  | 0.286 | 0.044 | 2.56E-15 | Hematopo | RCN1       |
| 2611 | TKT.1     | 1.47E-19 | 1.121432 | 0.937 | 0.509 | 2.77E-15 | Hematopo | TKT        |
| 2612 | ITGB3BP   | 1.67E-19 | 0.36564  | 0.397 | 0.076 | 3.13E-15 | Hematopo | ITGB3BP    |
| 2613 | SORBS3    | 1.78E-19 | 0.392987 | 0.317 | 0.053 | 3.34E-15 | Hematopo | SORBS3     |
| 2614 | EFCAB2    | 1.82E-19 | 0.251536 | 0.19  | 0.022 | 3.41E-15 | Hematopo | EFCAB2     |
| 2615 | BTF3.1    | 2.30E-19 | 0.742478 | 1     | 0.955 | 4.32E-15 | Hematopo | BTF3       |
| 2616 | ERGIC1    | 2.99E-19 | 0.581507 | 0.492 | 0.113 | 5.61E-15 | Hematopo | ERGIC1     |
| 2617 | NME2      | 3.94E-19 | 1.094341 | 0.937 | 0.611 | 7.40E-15 | Hematopo | NME2       |
| 2618 | RACK1.1   | 4.37E-19 | 0.665004 | 1     | 0.986 | 8.21E-15 | Hematopo | RACK1      |
| 2619 | HSD17B11  | 4.75E-19 | 0.924938 | 0.873 | 0.34  | 8.92E-15 | Hematopo | HSD17B11   |
| 2620 | ADAT2     | 5.41E-19 | 0.318564 | 0.238 | 0.033 | 1.02E-14 | Hematopo | ADAT2      |
| 2621 | PRDX1.1   | 6.18E-19 | 1.273928 | 0.952 | 0.537 | 1.16E-14 | Hematopo | PRDX1      |
| 2622 | CNN3      | 7.03E-19 | 0.25095  | 0.143 | 0.013 | 1.32E-14 | Hematopo | CNN3       |
| 2623 | YBX3      | 7.05E-19 | 0.437653 | 0.46  | 0.1   | 1.33E-14 | Hematopo | YBX3       |
| 2624 | SNHG8.1   | 9.90E-19 | 1.167759 | 0.889 | 0.445 | 1.86E-14 | Hematopo | SNHG8      |
| 2625 | GSN.1     | 1.04E-18 | 0.606476 | 0.365 | 0.071 | 1.96E-14 | Hematopo | GSN        |
| 2626 | BEX4.1    | 1.10E-18 | 0.888572 | 0.73  | 0.242 | 2.07E-14 | Hematopo | BEX4       |
| 2627 | PAPSS1    | 1.26E-18 | 0.620297 | 0.524 | 0.131 | 2.37E-14 | Hematopo | PAPSS1     |
| 2628 | LEPROT.1  | 1.94E-18 | 0.67464  | 0.46  | 0.108 | 3.64E-14 | Hematopo | LEPROT     |
| 2629 | NUTM2A-/- | 3.13E-18 | 0.624927 | 0.587 | 0.157 | 5.89E-14 | Hematopo | NUTM2A-AS1 |
| 2630 | NME7      | 3.16E-18 | 0.365228 | 0.27  | 0.042 | 5.93E-14 | Hematopo | NME7       |
| 2631 | RPL7A.1   | 3.41E-18 | 0.572643 | 1     | 0.992 | 6.41E-14 | Hematopo | RPL7A      |
| 2632 | AC008124. | 5.82E-18 | 0.45154  | 0.286 | 0.048 | 1.09E-13 | Hematopo | AC008124.1 |
| 2633 | CAT       | 7.86E-18 | 0.976348 | 0.73  | 0.262 | 1.48E-13 | Hematopo | CAT        |
| 2634 | CD82      | 8.83E-18 | 0.896246 | 0.619 | 0.186 | 1.66E-13 | Hematopo | CD82       |
| 2635 | EIF3J-DT  | 9.63E-18 | 0.456909 | 0.349 | 0.067 | 1.81E-13 | Hematopo | EIF3J-DT   |

|      |             |          |          |       |       |          |                      |
|------|-------------|----------|----------|-------|-------|----------|----------------------|
| 2636 | C11orf1     | 1.11E-17 | 0.503818 | 0.413 | 0.089 | 2.09E-13 | Hematopo C11orf1     |
| 2637 | SLC48A1     | 1.19E-17 | 0.262198 | 0.19  | 0.024 | 2.24E-13 | Hematopo SLC48A1     |
| 2638 | C19orf48.1  | 1.29E-17 | 0.44494  | 0.46  | 0.105 | 2.42E-13 | Hematopo C19orf48    |
| 2639 | B3GNTL1     | 1.59E-17 | 0.286805 | 0.238 | 0.035 | 3.00E-13 | Hematopo B3GNTL1     |
| 2640 | PHYH        | 2.17E-17 | 0.29399  | 0.254 | 0.039 | 4.08E-13 | Hematopo PHYH        |
| 2641 | CORO1A      | 4.64E-17 | -1.21762 | 0.698 | 0.922 | 8.71E-13 | Hematopo CORO1A      |
| 2642 | TBXAS1.1    | 5.72E-17 | 0.298152 | 0.365 | 0.073 | 1.07E-12 | Hematopo TBXAS1      |
| 2643 | COMT.1      | 6.19E-17 | 0.800077 | 0.698 | 0.231 | 1.16E-12 | Hematopo COMT        |
| 2644 | ZSCAN16-AS1 | 6.79E-17 | 0.412621 | 0.492 | 0.119 | 1.28E-12 | Hematopo ZSCAN16-AS1 |
| 2645 | SLC40A1     | 7.16E-17 | 1.025838 | 0.333 | 0.069 | 1.34E-12 | Hematopo SLC40A1     |
| 2646 | RPS9        | 8.64E-17 | 0.558964 | 1     | 0.992 | 1.62E-12 | Hematopo RPS9        |
| 2647 | Sep-11      | 8.71E-17 | 0.480132 | 0.333 | 0.066 | 1.64E-12 | Hematopo Sep-11      |
| 2648 | CYFIP1.1    | 1.03E-16 | 0.295872 | 0.175 | 0.021 | 1.93E-12 | Hematopo CYFIP1      |
| 2649 | AC090204.1  | 1.36E-16 | 0.272591 | 0.222 | 0.033 | 2.56E-12 | Hematopo AC090204.1  |
| 2650 | HADH.1      | 1.52E-16 | 0.580207 | 0.492 | 0.124 | 2.86E-12 | Hematopo HADH        |
| 2651 | ZCRB1       | 1.69E-16 | 0.496545 | 0.54  | 0.143 | 3.17E-12 | Hematopo ZCRB1       |
| 2652 | LZTFL1      | 1.70E-16 | 0.391893 | 0.286 | 0.051 | 3.20E-12 | Hematopo LZTFL1      |
| 2653 | G6PC3       | 1.77E-16 | 0.414213 | 0.333 | 0.066 | 3.33E-12 | Hematopo G6PC3       |
| 2654 | SNHG7.1     | 2.58E-16 | 1.089636 | 0.73  | 0.27  | 4.85E-12 | Hematopo SNHG7       |
| 2655 | FHL3        | 3.71E-16 | 0.493148 | 0.333 | 0.068 | 6.96E-12 | Hematopo FHL3        |
| 2656 | IL32.1      | 3.75E-16 | -3.27741 | 0     | 0.569 | 7.04E-12 | Hematopo IL32        |
| 2657 | CD3E.1      | 3.90E-16 | -3.02573 | 0.063 | 0.599 | 7.34E-12 | Hematopo CD3E        |
| 2658 | ACYP1       | 4.20E-16 | 0.429769 | 0.381 | 0.083 | 7.90E-12 | Hematopo ACYP1       |
| 2659 | HMGA1.1     | 5.13E-16 | 0.81317  | 0.698 | 0.243 | 9.63E-12 | Hematopo HMGA1       |
| 2660 | LGALS9.1    | 5.22E-16 | 0.502486 | 0.54  | 0.143 | 9.80E-12 | Hematopo LGALS9      |
| 2661 | MAPKAPK3    | 5.50E-16 | 0.647601 | 0.587 | 0.173 | 1.03E-11 | Hematopo MAPKAPK3    |
| 2662 | GNB4.1      | 5.81E-16 | 0.330496 | 0.286 | 0.052 | 1.09E-11 | Hematopo GNB4        |
| 2663 | UROD        | 6.42E-16 | 0.583617 | 0.587 | 0.171 | 1.21E-11 | Hematopo UROD        |
| 2664 | AL050341.1  | 6.44E-16 | 0.309802 | 0.238 | 0.038 | 1.21E-11 | Hematopo AL050341.2  |
| 2665 | MAML3       | 7.29E-16 | 0.288673 | 0.19  | 0.026 | 1.37E-11 | Hematopo MAML3       |
| 2666 | ABCC1       | 8.14E-16 | 0.314192 | 0.238 | 0.038 | 1.53E-11 | Hematopo ABCC1       |
| 2667 | HNRNPA1.1   | 1.09E-15 | 0.812808 | 1     | 0.925 | 2.04E-11 | Hematopo HNRNPA1     |
| 2668 | PYGL.1      | 1.25E-15 | 0.28999  | 0.27  | 0.048 | 2.35E-11 | Hematopo PYGL        |
| 2669 | C12orf73    | 1.28E-15 | 0.317024 | 0.302 | 0.057 | 2.41E-11 | Hematopo C12orf73    |
| 2670 | CD99        | 1.45E-15 | 1.196829 | 0.921 | 0.541 | 2.73E-11 | Hematopo CD99        |
| 2671 | DUT.1       | 1.52E-15 | 0.794556 | 0.873 | 0.363 | 2.86E-11 | Hematopo DUT         |
| 2672 | GSE1        | 1.58E-15 | 0.278204 | 0.254 | 0.043 | 2.97E-11 | Hematopo GSE1        |
| 2673 | CALM1.1     | 1.67E-15 | -1.326   | 0.762 | 0.879 | 3.14E-11 | Hematopo CALM1       |
| 2674 | BZW2.1      | 1.75E-15 | 0.79362  | 0.587 | 0.186 | 3.29E-11 | Hematopo BZW2        |
| 2675 | RPL26.1     | 1.87E-15 | 0.72577  | 1     | 0.989 | 3.52E-11 | Hematopo RPL26       |
| 2676 | LTB.1       | 2.04E-15 | -1.61498 | 0.381 | 0.809 | 3.83E-11 | Hematopo LTB         |
| 2677 | RPLP1.1     | 2.11E-15 | 0.523931 | 1     | 0.997 | 3.97E-11 | Hematopo RPLP1       |
| 2678 | TPM1        | 2.26E-15 | 0.271104 | 0.238 | 0.039 | 4.24E-11 | Hematopo TPM1        |
| 2679 | LYRM1       | 2.37E-15 | 0.499876 | 0.444 | 0.11  | 4.45E-11 | Hematopo LYRM1       |
| 2680 | MYL12A.1    | 2.40E-15 | -1.10173 | 0.921 | 0.946 | 4.51E-11 | Hematopo MYL12A      |
| 2681 | ATP5MC2     | 2.44E-15 | 0.639636 | 1     | 0.944 | 4.58E-11 | Hematopo ATP5MC2     |
| 2682 | TMEM38B     | 2.45E-15 | 0.512551 | 0.333 | 0.07  | 4.60E-11 | Hematopo TMEM38B     |

|      |            |          |          |       |       |          |                     |
|------|------------|----------|----------|-------|-------|----------|---------------------|
| 2683 | CCNB1IP1.  | 2.47E-15 | 0.494849 | 0.46  | 0.117 | 4.65E-11 | Hematopo CCNB1IP1   |
| 2684 | PHGDH      | 2.59E-15 | 0.35846  | 0.238 | 0.04  | 4.86E-11 | Hematopo PHGDH      |
| 2685 | HIST3H2A   | 2.61E-15 | 0.292561 | 0.238 | 0.039 | 4.90E-11 | Hematopo HIST3H2A   |
| 2686 | HSPD1.1    | 2.72E-15 | 0.943746 | 0.921 | 0.451 | 5.11E-11 | Hematopo HSPD1      |
| 2687 | PRAM1.1    | 3.10E-15 | 0.43881  | 0.302 | 0.06  | 5.83E-11 | Hematopo PRAM1      |
| 2688 | LIMD2.1    | 3.28E-15 | -1.11312 | 0.889 | 0.928 | 6.16E-11 | Hematopo LIMD2      |
| 2689 | ARMH1.1    | 3.60E-15 | 0.738884 | 0.603 | 0.192 | 6.77E-11 | Hematopo ARMH1      |
| 2690 | HEBP1.1    | 4.83E-15 | 0.59333  | 0.524 | 0.149 | 9.06E-11 | Hematopo HEBP1      |
| 2691 | WWOX       | 6.72E-15 | 0.295847 | 0.222 | 0.036 | 1.26E-10 | Hematopo WWOX       |
| 2692 | PGD.1      | 6.73E-15 | 0.561888 | 0.667 | 0.219 | 1.27E-10 | Hematopo PGD        |
| 2693 | HENMT1     | 7.29E-15 | 0.442371 | 0.381 | 0.088 | 1.37E-10 | Hematopo HENMT1     |
| 2694 | PFN1.1     | 7.59E-15 | -0.99466 | 1     | 0.984 | 1.43E-10 | Hematopo PFN1       |
| 2695 | GOLIM4     | 7.77E-15 | 0.250704 | 0.143 | 0.017 | 1.46E-10 | Hematopo GOLIM4     |
| 2696 | CTSF       | 8.34E-15 | 0.326831 | 0.238 | 0.04  | 1.57E-10 | Hematopo CTSF       |
| 2697 | DUSP3.1    | 9.05E-15 | 0.271367 | 0.222 | 0.036 | 1.70E-10 | Hematopo DUSP3      |
| 2698 | SLC27A5    | 9.30E-15 | 0.311594 | 0.286 | 0.055 | 1.75E-10 | Hematopo SLC27A5    |
| 2699 | AC245595.  | 1.26E-14 | 0.290969 | 0.127 | 0.014 | 2.37E-10 | Hematopo AC245595.1 |
| 2700 | SNHG10     | 1.45E-14 | 0.4292   | 0.365 | 0.083 | 2.72E-10 | Hematopo SNHG10     |
| 2701 | MPG        | 1.87E-14 | 0.695064 | 0.778 | 0.29  | 3.52E-10 | Hematopo MPG        |
| 2702 | CD3D.1     | 1.90E-14 | -2.41961 | 0.016 | 0.536 | 3.57E-10 | Hematopo CD3D       |
| 2703 | HIBCH      | 1.91E-14 | 0.357104 | 0.444 | 0.112 | 3.58E-10 | Hematopo HIBCH      |
| 2704 | LINC02256  | 2.21E-14 | 0.434105 | 0.365 | 0.084 | 4.15E-10 | Hematopo LINC02256  |
| 2705 | FKBP3      | 2.29E-14 | 0.399341 | 0.571 | 0.164 | 4.31E-10 | Hematopo FKBP3      |
| 2706 | MAN1A1     | 2.33E-14 | 0.432957 | 0.206 | 0.033 | 4.38E-10 | Hematopo MAN1A1     |
| 2707 | B3GNT2     | 2.34E-14 | 0.595261 | 0.46  | 0.126 | 4.39E-10 | Hematopo B3GNT2     |
| 2708 | EIF4EBP1.1 | 2.42E-14 | 0.440095 | 0.46  | 0.121 | 4.55E-10 | Hematopo EIF4EBP1   |
| 2709 | LIMA1      | 2.86E-14 | 0.254935 | 0.254 | 0.046 | 5.37E-10 | Hematopo LIMA1      |
| 2710 | TAGLN2.1   | 2.99E-14 | 1.087838 | 0.968 | 0.772 | 5.61E-10 | Hematopo TAGLN2     |
| 2711 | RUNX1      | 3.07E-14 | 0.430123 | 0.349 | 0.079 | 5.77E-10 | Hematopo RUNX1      |
| 2712 | GIMAP4.1   | 3.29E-14 | -2.00545 | 0.079 | 0.57  | 6.19E-10 | Hematopo GIMAP4     |
| 2713 | MAGED1     | 3.61E-14 | 0.344122 | 0.381 | 0.089 | 6.79E-10 | Hematopo MAGED1     |
| 2714 | NCOA7      | 3.71E-14 | 0.679951 | 0.397 | 0.102 | 6.97E-10 | Hematopo NCOA7      |
| 2715 | RPS3.1     | 3.91E-14 | 0.495384 | 1     | 0.993 | 7.35E-10 | Hematopo RPS3       |
| 2716 | FAHD2A     | 3.94E-14 | 0.326362 | 0.333 | 0.073 | 7.40E-10 | Hematopo FAHD2A     |
| 2717 | ANTXR2     | 6.84E-14 | 0.276817 | 0.286 | 0.057 | 1.28E-09 | Hematopo ANTXR2     |
| 2718 | B4GAT1     | 6.92E-14 | 0.281486 | 0.175 | 0.025 | 1.30E-09 | Hematopo B4GAT1     |
| 2719 | GPSM3      | 7.52E-14 | -1.20161 | 0.603 | 0.803 | 1.41E-09 | Hematopo GPSM3      |
| 2720 | CCDC34     | 8.51E-14 | 0.296759 | 0.175 | 0.025 | 1.60E-09 | Hematopo CCDC34     |
| 2721 | UQCRH      | 9.11E-14 | 0.690573 | 0.984 | 0.772 | 1.71E-09 | Hematopo UQCRH      |
| 2722 | MYO15B     | 9.20E-14 | 0.314643 | 0.222 | 0.038 | 1.73E-09 | Hematopo MYO15B     |
| 2723 | FYB1.1     | 9.64E-14 | -1.99442 | 0.095 | 0.571 | 1.81E-09 | Hematopo FYB1       |
| 2724 | EIF3E.1    | 1.08E-13 | 0.898511 | 0.937 | 0.679 | 2.03E-09 | Hematopo EIF3E      |
| 2725 | TP53I13    | 1.46E-13 | 0.428888 | 0.46  | 0.125 | 2.74E-09 | Hematopo TP53I13    |
| 2726 | RPL15.1    | 1.48E-13 | 0.514403 | 1     | 0.981 | 2.78E-09 | Hematopo RPL15      |
| 2727 | GPR146     | 1.58E-13 | 0.260305 | 0.19  | 0.029 | 2.96E-09 | Hematopo GPR146     |
| 2728 | SQLE       | 1.79E-13 | 0.413516 | 0.27  | 0.054 | 3.36E-09 | Hematopo SQLE       |
| 2729 | LCK.1      | 2.01E-13 | -1.91836 | 0.079 | 0.559 | 3.78E-09 | Hematopo LCK        |

|      |            |          |          |       |       |          |          |             |
|------|------------|----------|----------|-------|-------|----------|----------|-------------|
| 2730 | TFDP2.1    | 2.10E-13 | 0.427055 | 0.413 | 0.105 | 3.94E-09 | Hematopo | TFDP2       |
| 2731 | C15orf39.1 | 2.36E-13 | 0.430203 | 0.317 | 0.072 | 4.44E-09 | Hematopo | C15orf39    |
| 2732 | AGPS       | 2.54E-13 | 0.337785 | 0.286 | 0.059 | 4.77E-09 | Hematopo | AGPS        |
| 2733 | EIF4A1.1   | 2.56E-13 | 0.677266 | 0.619 | 0.211 | 4.80E-09 | Hematopo | EIF4A1      |
| 2734 | TCF4       | 2.71E-13 | 0.400216 | 0.46  | 0.125 | 5.10E-09 | Hematopo | TCF4        |
| 2735 | CEP170     | 2.79E-13 | 0.32645  | 0.333 | 0.076 | 5.23E-09 | Hematopo | CEP170      |
| 2736 | EVL.1      | 3.58E-13 | -1.45694 | 0.365 | 0.74  | 6.72E-09 | Hematopo | EVL         |
| 2737 | TMED3      | 3.85E-13 | 0.539209 | 0.524 | 0.159 | 7.23E-09 | Hematopo | TMED3       |
| 2738 | NME1       | 3.93E-13 | 0.457383 | 0.429 | 0.116 | 7.39E-09 | Hematopo | NME1        |
| 2739 | LAG3       | 3.99E-13 | 0.282985 | 0.175 | 0.026 | 7.50E-09 | Hematopo | LAG3        |
| 2740 | TMEM14C    | 4.50E-13 | 0.676559 | 0.635 | 0.226 | 8.45E-09 | Hematopo | TMEM14C     |
| 2741 | ACTB.1     | 4.98E-13 | -0.89539 | 1     | 0.999 | 9.36E-09 | Hematopo | ACTB        |
| 2742 | VAT1       | 5.33E-13 | 0.44837  | 0.397 | 0.104 | 1.00E-08 | Hematopo | VAT1        |
| 2743 | CLIC1.1    | 5.71E-13 | 0.722061 | 1     | 0.697 | 1.07E-08 | Hematopo | CLIC1       |
| 2744 | CLEC11A    | 6.52E-13 | 0.574473 | 0.349 | 0.085 | 1.22E-08 | Hematopo | CLEC11A     |
| 2745 | RPL7.1     | 6.87E-13 | 0.691571 | 0.968 | 0.867 | 1.29E-08 | Hematopo | RPL7        |
| 2746 | RFK        | 7.70E-13 | 0.273767 | 0.317 | 0.071 | 1.45E-08 | Hematopo | RFK         |
| 2747 | RPS18.1    | 7.87E-13 | 0.511333 | 1     | 0.991 | 1.48E-08 | Hematopo | RPS18       |
| 2748 | EIF2AK4    | 7.92E-13 | 0.356803 | 0.349 | 0.084 | 1.49E-08 | Hematopo | EIF2AK4     |
| 2749 | PAICS.1    | 8.00E-13 | 0.439497 | 0.429 | 0.116 | 1.50E-08 | Hematopo | PAICS       |
| 2750 | CASP6      | 8.04E-13 | 0.367208 | 0.317 | 0.073 | 1.51E-08 | Hematopo | CASP6       |
| 2751 | CCDC14     | 8.35E-13 | 0.268619 | 0.286 | 0.06  | 1.57E-08 | Hematopo | CCDC14      |
| 2752 | RPL24.1    | 8.79E-13 | 0.48396  | 1     | 0.985 | 1.65E-08 | Hematopo | RPL24       |
| 2753 | SYPL1.1    | 1.04E-12 | 0.720322 | 0.825 | 0.365 | 1.96E-08 | Hematopo | SYPL1       |
| 2754 | RPS23.1    | 1.12E-12 | 0.428042 | 1     | 0.993 | 2.10E-08 | Hematopo | RPS23       |
| 2755 | IFITM1.1   | 1.15E-12 | -1.95139 | 0.667 | 0.803 | 2.16E-08 | Hematopo | IFITM1      |
| 2756 | SPTLC2.1   | 1.16E-12 | 0.335906 | 0.444 | 0.121 | 2.18E-08 | Hematopo | SPTLC2      |
| 2757 | CXorf21    | 1.18E-12 | 0.255523 | 0.238 | 0.045 | 2.22E-08 | Hematopo | CXorf21     |
| 2758 | TP53BP1    | 1.20E-12 | 0.291417 | 0.238 | 0.046 | 2.25E-08 | Hematopo | TP53BP1     |
| 2759 | NUDT8      | 1.26E-12 | 0.285389 | 0.206 | 0.036 | 2.37E-08 | Hematopo | NUDT8       |
| 2760 | ZNF496     | 1.42E-12 | 0.265021 | 0.19  | 0.031 | 2.67E-08 | Hematopo | ZNF496      |
| 2761 | SPATC1L    | 1.47E-12 | 0.337359 | 0.317 | 0.073 | 2.76E-08 | Hematopo | SPATC1L     |
| 2762 | MIR4435-2  | 1.58E-12 | 0.312977 | 0.302 | 0.068 | 2.97E-08 | Hematopo | MIR4435-2HG |
| 2763 | DNAJC1     | 1.76E-12 | 0.475959 | 0.476 | 0.142 | 3.31E-08 | Hematopo | DNAJC1      |
| 2764 | PTPRC      | 1.79E-12 | -1.15648 | 0.73  | 0.855 | 3.36E-08 | Hematopo | PTPRC       |
| 2765 | CCDC88A.1  | 1.84E-12 | 0.284326 | 0.27  | 0.057 | 3.45E-08 | Hematopo | CCDC88A     |
| 2766 | CD7.1      | 1.93E-12 | -2.50899 | 0.175 | 0.576 | 3.63E-08 | Hematopo | CD7         |
| 2767 | SSBP4      | 2.05E-12 | 0.481638 | 0.524 | 0.162 | 3.84E-08 | Hematopo | SSBP4       |
| 2768 | TATDN1.1   | 2.21E-12 | 0.552768 | 0.54  | 0.174 | 4.16E-08 | Hematopo | TATDN1      |
| 2769 | IFT52      | 2.22E-12 | 0.300036 | 0.349 | 0.085 | 4.16E-08 | Hematopo | IFT52       |
| 2770 | SPNS3      | 2.26E-12 | 0.467238 | 0.286 | 0.064 | 4.25E-08 | Hematopo | SPNS3       |
| 2771 | MAGED2.1   | 2.41E-12 | 0.52251  | 0.635 | 0.22  | 4.53E-08 | Hematopo | MAGED2      |
| 2772 | FAM228B    | 2.51E-12 | 0.2768   | 0.222 | 0.041 | 4.72E-08 | Hematopo | FAM228B     |
| 2773 | FES.1      | 2.69E-12 | 0.370056 | 0.333 | 0.081 | 5.05E-08 | Hematopo | FES         |
| 2774 | STOML2     | 3.18E-12 | 0.565299 | 0.698 | 0.256 | 5.98E-08 | Hematopo | STOML2      |
| 2775 | LAPTM4A.1  | 3.19E-12 | 0.703086 | 0.825 | 0.375 | 5.98E-08 | Hematopo | LAPTM4A     |
| 2776 | CNBD2      | 3.85E-12 | 0.265825 | 0.206 | 0.037 | 7.23E-08 | Hematopo | CNBD2       |

|      |           |          |          |       |       |          |          |               |
|------|-----------|----------|----------|-------|-------|----------|----------|---------------|
| 2777 | ACADM.1   | 4.04E-12 | 0.556681 | 0.524 | 0.171 | 7.58E-08 | Hematopo | ACADM         |
| 2778 | RTN3.1    | 4.10E-12 | 0.472033 | 0.556 | 0.18  | 7.70E-08 | Hematopo | RTN3          |
| 2779 | TPGS2     | 4.17E-12 | 0.305625 | 0.429 | 0.118 | 7.83E-08 | Hematopo | TPGS2         |
| 2780 | SLC25A43  | 4.90E-12 | 0.257491 | 0.175 | 0.028 | 9.20E-08 | Hematopo | SLC25A43      |
| 2781 | MIF.1     | 5.71E-12 | 0.839729 | 0.984 | 0.833 | 1.07E-07 | Hematopo | MIF           |
| 2782 | TSEN34.1  | 5.74E-12 | 0.415245 | 0.524 | 0.163 | 1.08E-07 | Hematopo | TSEN34        |
| 2783 | ARL2      | 6.49E-12 | 0.469809 | 0.46  | 0.138 | 1.22E-07 | Hematopo | ARL2          |
| 2784 | MTA1      | 7.20E-12 | 0.418708 | 0.238 | 0.049 | 1.35E-07 | Hematopo | MTA1          |
| 2785 | OSTC      | 7.48E-12 | 0.739906 | 0.825 | 0.434 | 1.40E-07 | Hematopo | OSTC          |
| 2786 | VPS41     | 7.56E-12 | 0.374576 | 0.381 | 0.102 | 1.42E-07 | Hematopo | VPS41         |
| 2787 | RPS6.1    | 8.13E-12 | 0.555019 | 1     | 0.989 | 1.53E-07 | Hematopo | RPS6          |
| 2788 | KLF10.1   | 8.22E-12 | 0.283591 | 0.27  | 0.059 | 1.54E-07 | Hematopo | KLF10         |
| 2789 | CBFA2T3   | 9.33E-12 | 0.259996 | 0.175 | 0.029 | 1.75E-07 | Hematopo | CBFA2T3       |
| 2790 | AKR1A1.1  | 9.37E-12 | 0.621568 | 0.73  | 0.292 | 1.76E-07 | Hematopo | AKR1A1        |
| 2791 | SEM1.1    | 9.94E-12 | 0.653588 | 0.889 | 0.414 | 1.87E-07 | Hematopo | SEM1          |
| 2792 | SARAF.1   | 1.14E-11 | -1.18824 | 0.778 | 0.887 | 2.14E-07 | Hematopo | SARAF         |
| 2793 | LINC00861 | 1.27E-11 | -1.87058 | 0     | 0.45  | 2.39E-07 | Hematopo | LINC00861     |
| 2794 | RPL31.1   | 1.43E-11 | 0.674491 | 0.984 | 0.877 | 2.69E-07 | Hematopo | RPL31         |
| 2795 | ACOT13    | 1.45E-11 | 0.341391 | 0.302 | 0.072 | 2.73E-07 | Hematopo | ACOT13        |
| 2796 | AC116407. | 1.50E-11 | 0.294041 | 0.238 | 0.049 | 2.82E-07 | Hematopo | AC116407.2    |
| 2797 | RPL5.1    | 1.65E-11 | 0.475444 | 1     | 0.984 | 3.10E-07 | Hematopo | RPL5          |
| 2798 | TARS      | 2.13E-11 | 0.304946 | 0.429 | 0.122 | 4.00E-07 | Hematopo | TARS          |
| 2799 | PABPN1    | 2.14E-11 | 0.38559  | 0.444 | 0.132 | 4.01E-07 | Hematopo | PABPN1        |
| 2800 | CD200     | 2.48E-11 | 0.251953 | 0.238 | 0.048 | 4.66E-07 | Hematopo | CD200         |
| 2801 | SPN       | 2.76E-11 | 0.478374 | 0.571 | 0.199 | 5.19E-07 | Hematopo | SPN           |
| 2802 | DNPH1.1   | 2.88E-11 | 0.553841 | 0.667 | 0.257 | 5.41E-07 | Hematopo | DNPH1         |
| 2803 | TNRC18.1  | 2.93E-11 | 0.294146 | 0.19  | 0.035 | 5.51E-07 | Hematopo | TNRC18        |
| 2804 | ITGB2.1   | 3.04E-11 | -1.69272 | 0.349 | 0.647 | 5.72E-07 | Hematopo | ITGB2         |
| 2805 | PFDN4     | 3.11E-11 | 0.490174 | 0.524 | 0.176 | 5.84E-07 | Hematopo | PFDN4         |
| 2806 | ACADS     | 3.20E-11 | 0.319855 | 0.286 | 0.067 | 6.01E-07 | Hematopo | ACADS         |
| 2807 | MRPL16    | 3.46E-11 | 0.627307 | 0.651 | 0.25  | 6.50E-07 | Hematopo | MRPL16        |
| 2808 | PIGM      | 3.54E-11 | 0.285094 | 0.238 | 0.05  | 6.64E-07 | Hematopo | PIGM          |
| 2809 | DNAJC25-C | 3.57E-11 | 0.279841 | 0.333 | 0.085 | 6.71E-07 | Hematopo | DNAJC25-GNG10 |
| 2810 | ATP2C1    | 3.72E-11 | 0.271455 | 0.222 | 0.045 | 6.99E-07 | Hematopo | ATP2C1        |
| 2811 | FCMR.1    | 3.75E-11 | -1.58317 | 0.175 | 0.577 | 7.05E-07 | Hematopo | FCMR          |
| 2812 | PDRG1     | 3.78E-11 | 0.314335 | 0.302 | 0.073 | 7.11E-07 | Hematopo | PDRG1         |
| 2813 | LAT2      | 3.88E-11 | 0.463069 | 0.619 | 0.215 | 7.30E-07 | Hematopo | LAT2          |
| 2814 | CAMLG     | 3.92E-11 | 0.516032 | 0.651 | 0.246 | 7.36E-07 | Hematopo | CAMLG         |
| 2815 | SLC39A10  | 3.97E-11 | 0.377014 | 0.349 | 0.093 | 7.45E-07 | Hematopo | SLC39A10      |
| 2816 | CCR7.1    | 4.22E-11 | -1.96587 | 0.143 | 0.539 | 7.93E-07 | Hematopo | CCR7          |
| 2817 | HADHB     | 4.62E-11 | 0.487281 | 0.635 | 0.232 | 8.68E-07 | Hematopo | HADHB         |
| 2818 | ZNF22.1   | 4.96E-11 | 0.50372  | 0.73  | 0.283 | 9.31E-07 | Hematopo | ZNF22         |
| 2819 | LEF1.1    | 5.38E-11 | -1.90458 | 0     | 0.431 | 1.01E-06 | Hematopo | LEF1          |
| 2820 | DHRS4     | 5.52E-11 | 0.408006 | 0.508 | 0.166 | 1.04E-06 | Hematopo | DHRS4         |
| 2821 | HPS4      | 5.90E-11 | 0.252388 | 0.333 | 0.085 | 1.11E-06 | Hematopo | HPS4          |
| 2822 | ZMIZ1.1   | 6.11E-11 | 0.32188  | 0.19  | 0.036 | 1.15E-06 | Hematopo | ZMIZ1         |
| 2823 | TM7SF3    | 6.68E-11 | 0.493253 | 0.349 | 0.097 | 1.25E-06 | Hematopo | TM7SF3        |



|      |           |          |          |       |       |          |          |            |
|------|-----------|----------|----------|-------|-------|----------|----------|------------|
| 2824 | SLC17A9   | 7.46E-11 | 0.285113 | 0.206 | 0.041 | 1.40E-06 | Hematopo | SLC17A9    |
| 2825 | IQGAP2.1  | 7.70E-11 | 0.659582 | 0.413 | 0.125 | 1.45E-06 | Hematopo | IQGAP2     |
| 2826 | LAT.1     | 8.55E-11 | -1.60392 | 0     | 0.425 | 1.61E-06 | Hematopo | LAT        |
| 2827 | BST2.1    | 9.14E-11 | 0.860903 | 0.794 | 0.438 | 1.72E-06 | Hematopo | BST2       |
| 2828 | PSMA6     | 1.04E-10 | 0.637249 | 0.841 | 0.4   | 1.95E-06 | Hematopo | PSMA6      |
| 2829 | BCL11A    | 1.06E-10 | 0.276658 | 0.349 | 0.093 | 1.99E-06 | Hematopo | BCL11A     |
| 2830 | FAM219B   | 1.07E-10 | 0.273448 | 0.317 | 0.081 | 2.02E-06 | Hematopo | FAM219B    |
| 2831 | CYP51A1   | 1.20E-10 | 0.280023 | 0.222 | 0.047 | 2.25E-06 | Hematopo | CYP51A1    |
| 2832 | HPRT1     | 1.23E-10 | 0.522394 | 0.619 | 0.226 | 2.30E-06 | Hematopo | HPRT1      |
| 2833 | TSPAN3.1  | 1.24E-10 | 0.34301  | 0.603 | 0.207 | 2.34E-06 | Hematopo | TSPAN3     |
| 2834 | MAT2A.1   | 1.29E-10 | 0.557247 | 0.651 | 0.252 | 2.43E-06 | Hematopo | MAT2A      |
| 2835 | NAPA-AS1  | 1.30E-10 | 0.329693 | 0.175 | 0.032 | 2.45E-06 | Hematopo | NAPA-AS1   |
| 2836 | BPHL      | 1.38E-10 | 0.254436 | 0.143 | 0.022 | 2.60E-06 | Hematopo | BPHL       |
| 2837 | RPS15.1   | 1.45E-10 | 0.385437 | 1     | 0.994 | 2.73E-06 | Hematopo | RPS15      |
| 2838 | IL7R.1    | 1.48E-10 | -2.43912 | 0.063 | 0.468 | 2.77E-06 | Hematopo | IL7R       |
| 2839 | BTK       | 1.54E-10 | 0.343633 | 0.492 | 0.157 | 2.89E-06 | Hematopo | BTK        |
| 2840 | MED21     | 1.59E-10 | 0.344148 | 0.302 | 0.077 | 2.99E-06 | Hematopo | MED21      |
| 2841 | ZFP36L2.1 | 1.65E-10 | 0.931872 | 0.905 | 0.629 | 3.10E-06 | Hematopo | ZFP36L2    |
| 2842 | ATG14     | 1.69E-10 | 0.263588 | 0.222 | 0.047 | 3.17E-06 | Hematopo | ATG14      |
| 2843 | RBFA      | 1.83E-10 | 0.294421 | 0.381 | 0.109 | 3.44E-06 | Hematopo | RBFA       |
| 2844 | C12orf10  | 1.84E-10 | 0.467257 | 0.556 | 0.194 | 3.45E-06 | Hematopo | C12orf10   |
| 2845 | NAA80     | 1.85E-10 | 0.254236 | 0.222 | 0.047 | 3.47E-06 | Hematopo | NAA80      |
| 2846 | AC027682. | 1.90E-10 | 0.25967  | 0.127 | 0.018 | 3.57E-06 | Hematopo | AC027682.4 |
| 2847 | NOSIP.1   | 1.92E-10 | -1.85971 | 0.397 | 0.634 | 3.61E-06 | Hematopo | NOSIP      |
| 2848 | SLC39A8   | 2.03E-10 | 0.275255 | 0.206 | 0.042 | 3.81E-06 | Hematopo | SLC39A8    |
| 2849 | LYL1      | 2.14E-10 | 0.261886 | 0.222 | 0.047 | 4.02E-06 | Hematopo | LYL1       |
| 2850 | ANXA1.1   | 2.21E-10 | 1.347573 | 0.683 | 0.35  | 4.15E-06 | Hematopo | ANXA1      |
| 2851 | MED24     | 2.21E-10 | 0.288793 | 0.27  | 0.065 | 4.16E-06 | Hematopo | MED24      |
| 2852 | AES.1     | 2.27E-10 | -1.30347 | 0.587 | 0.732 | 4.27E-06 | Hematopo | AES        |
| 2853 | C12orf76  | 2.38E-10 | 0.263616 | 0.429 | 0.127 | 4.48E-06 | Hematopo | C12orf76   |
| 2854 | CD3G.1    | 2.44E-10 | -1.59729 | 0     | 0.411 | 4.58E-06 | Hematopo | CD3G       |
| 2855 | GZMM.1    | 2.74E-10 | -1.68257 | 0     | 0.409 | 5.14E-06 | Hematopo | GZMM       |
| 2856 | AL450998. | 2.74E-10 | 0.268947 | 0.349 | 0.094 | 5.15E-06 | Hematopo | AL450998.2 |
| 2857 | ETFRF1    | 2.77E-10 | 0.275654 | 0.381 | 0.109 | 5.21E-06 | Hematopo | ETFRF1     |
| 2858 | HLA-A     | 3.01E-10 | -0.89333 | 0.889 | 0.903 | 5.66E-06 | Hematopo | HLA-A      |
| 2859 | CD27.1    | 3.02E-10 | -1.57756 | 0.016 | 0.421 | 5.68E-06 | Hematopo | CD27       |
| 2860 | COTL1.1   | 3.15E-10 | -1.92132 | 0.302 | 0.591 | 5.92E-06 | Hematopo | COTL1      |
| 2861 | COX20     | 3.16E-10 | 0.33841  | 0.54  | 0.182 | 5.94E-06 | Hematopo | COX20      |
| 2862 | PRDX6     | 3.68E-10 | 0.599121 | 0.857 | 0.449 | 6.91E-06 | Hematopo | PRDX6      |
| 2863 | MAP3K13   | 3.69E-10 | 0.324371 | 0.302 | 0.079 | 6.93E-06 | Hematopo | MAP3K13    |
| 2864 | BAD       | 3.84E-10 | 0.377596 | 0.397 | 0.12  | 7.21E-06 | Hematopo | BAD        |
| 2865 | BLVRA.1   | 3.92E-10 | 0.312873 | 0.365 | 0.105 | 7.37E-06 | Hematopo | BLVRA      |
| 2866 | CST3.1    | 3.92E-10 | -1.33233 | 0.476 | 0.143 | 7.37E-06 | Hematopo | CST3       |
| 2867 | CRYL1     | 4.02E-10 | 0.302171 | 0.317 | 0.084 | 7.55E-06 | Hematopo | CRYL1      |
| 2868 | PPA2      | 4.06E-10 | 0.374332 | 0.397 | 0.121 | 7.62E-06 | Hematopo | PPA2       |
| 2869 | YBEY      | 4.74E-10 | 0.355928 | 0.365 | 0.106 | 8.91E-06 | Hematopo | YBEY       |
| 2870 | LAPTM5    | 4.84E-10 | -0.98181 | 0.81  | 0.871 | 9.08E-06 | Hematopo | LAPTM5     |

|      |            |          |          |       |       |          |                     |
|------|------------|----------|----------|-------|-------|----------|---------------------|
| 2871 | RAC2.1     | 4.97E-10 | -0.80686 | 0.889 | 0.907 | 9.34E-06 | Hematopo RAC2       |
| 2872 | HADHA      | 5.26E-10 | 0.675346 | 0.825 | 0.427 | 9.88E-06 | Hematopo HADHA      |
| 2873 | PDCL       | 5.59E-10 | 0.283723 | 0.302 | 0.079 | 1.05E-05 | Hematopo PDCL       |
| 2874 | AHCY       | 5.83E-10 | 0.559842 | 0.508 | 0.182 | 1.09E-05 | Hematopo AHCY       |
| 2875 | TPM4.1     | 6.03E-10 | 0.681137 | 0.603 | 0.244 | 1.13E-05 | Hematopo TPM4       |
| 2876 | SIL1       | 6.03E-10 | 0.259382 | 0.27  | 0.067 | 1.13E-05 | Hematopo SIL1       |
| 2877 | GPX7.1     | 6.22E-10 | 0.310871 | 0.397 | 0.119 | 1.17E-05 | Hematopo GPX7       |
| 2878 | MED13L     | 6.65E-10 | 0.377466 | 0.254 | 0.062 | 1.25E-05 | Hematopo MED13L     |
| 2879 | ADA        | 6.71E-10 | 0.744157 | 0.397 | 0.13  | 1.26E-05 | Hematopo ADA        |
| 2880 | RPL12.1    | 6.98E-10 | 0.408459 | 1     | 0.992 | 1.31E-05 | Hematopo RPL12      |
| 2881 | PGAP2      | 8.78E-10 | 0.320301 | 0.286 | 0.074 | 1.65E-05 | Hematopo PGAP2      |
| 2882 | UFC1       | 9.11E-10 | 0.598872 | 0.873 | 0.509 | 1.71E-05 | Hematopo UFC1       |
| 2883 | RPL36A.1   | 9.18E-10 | 0.95823  | 0.968 | 0.804 | 1.72E-05 | Hematopo RPL36A     |
| 2884 | CFDP1      | 1.03E-09 | 0.462894 | 0.571 | 0.213 | 1.94E-05 | Hematopo CFDP1      |
| 2885 | LRBA.1     | 1.12E-09 | 0.276289 | 0.397 | 0.119 | 2.11E-05 | Hematopo LRBA       |
| 2886 | ST13.1     | 1.16E-09 | 0.633592 | 0.952 | 0.628 | 2.19E-05 | Hematopo ST13       |
| 2887 | KLF2.1     | 1.20E-09 | -1.54856 | 0.127 | 0.499 | 2.26E-05 | Hematopo KLF2       |
| 2888 | TCF7.1     | 1.31E-09 | -1.85369 | 0.032 | 0.415 | 2.46E-05 | Hematopo TCF7       |
| 2889 | GSTM2      | 1.32E-09 | 0.296705 | 0.317 | 0.087 | 2.49E-05 | Hematopo GSTM2      |
| 2890 | ZKSCAN1    | 1.34E-09 | 0.354071 | 0.381 | 0.116 | 2.52E-05 | Hematopo ZKSCAN1    |
| 2891 | AC020916.1 | 1.38E-09 | 0.317886 | 0.127 | 0.02  | 2.59E-05 | Hematopo AC020916.1 |
| 2892 | CD247.1    | 1.57E-09 | -1.59711 | 0     | 0.385 | 2.96E-05 | Hematopo CD247      |
| 2893 | ISG20.1    | 1.58E-09 | -1.36807 | 0.238 | 0.563 | 2.97E-05 | Hematopo ISG20      |
| 2894 | RHEX       | 1.74E-09 | 0.282324 | 0.159 | 0.029 | 3.28E-05 | Hematopo RHEX       |
| 2895 | CAMTA1.1   | 1.85E-09 | 0.370216 | 0.524 | 0.186 | 3.47E-05 | Hematopo CAMTA1     |
| 2896 | TRAF3IP3.1 | 1.85E-09 | -1.26112 | 0.444 | 0.661 | 3.48E-05 | Hematopo TRAF3IP3   |
| 2897 | TUBA4A.1   | 2.00E-09 | -1.25977 | 0.032 | 0.41  | 3.76E-05 | Hematopo TUBA4A     |
| 2898 | DYNLL1.1   | 2.47E-09 | 0.651941 | 0.841 | 0.416 | 4.63E-05 | Hematopo DYNLL1     |
| 2899 | PRDX4      | 2.48E-09 | 0.344911 | 0.429 | 0.14  | 4.66E-05 | Hematopo PRDX4      |
| 2900 | PSMB5      | 2.63E-09 | 0.377378 | 0.524 | 0.189 | 4.94E-05 | Hematopo PSMB5      |
| 2901 | MEMO1      | 2.68E-09 | 0.28958  | 0.302 | 0.083 | 5.03E-05 | Hematopo MEMO1      |
| 2902 | FMC1       | 2.73E-09 | 0.307042 | 0.476 | 0.161 | 5.12E-05 | Hematopo FMC1       |
| 2903 | RPL35.1    | 2.88E-09 | 0.438365 | 1     | 0.983 | 5.41E-05 | Hematopo RPL35      |
| 2904 | GIMAP7.1   | 2.93E-09 | -1.61175 | 0.397 | 0.626 | 5.50E-05 | Hematopo GIMAP7     |
| 2905 | CRIP1      | 2.94E-09 | 0.306398 | 0.349 | 0.104 | 5.53E-05 | Hematopo CRIP1      |
| 2906 | EEF1D.1    | 2.94E-09 | -0.5509  | 1     | 0.984 | 5.53E-05 | Hematopo EEF1D      |
| 2907 | LBH.1      | 3.04E-09 | -1.44217 | 0.159 | 0.489 | 5.72E-05 | Hematopo LBH        |
| 2908 | BISPR      | 3.14E-09 | 0.256454 | 0.222 | 0.051 | 5.90E-05 | Hematopo BISPR      |
| 2909 | APEX1.1    | 3.28E-09 | 0.684123 | 0.81  | 0.481 | 6.17E-05 | Hematopo APEX1      |
| 2910 | NT5C2      | 3.53E-09 | 0.329282 | 0.286 | 0.078 | 6.64E-05 | Hematopo NT5C2      |
| 2911 | DNAJC4     | 3.71E-09 | 0.570917 | 0.698 | 0.31  | 6.96E-05 | Hematopo DNAJC4     |
| 2912 | TMEM173    | 4.34E-09 | 0.442783 | 0.524 | 0.192 | 8.16E-05 | Hematopo TMEM173    |
| 2913 | CTNNA1.1   | 4.42E-09 | 0.280869 | 0.238 | 0.059 | 8.30E-05 | Hematopo CTNNA1     |
| 2914 | RPS17      | 4.57E-09 | 0.451395 | 0.54  | 0.205 | 8.58E-05 | Hematopo RPS17      |
| 2915 | SAMHD1.1   | 4.67E-09 | -1.32941 | 0.048 | 0.417 | 8.77E-05 | Hematopo SAMHD1     |
| 2916 | KIAA1586   | 4.90E-09 | 0.262633 | 0.254 | 0.064 | 9.20E-05 | Hematopo KIAA1586   |
| 2917 | DOK1.1     | 5.09E-09 | 0.321123 | 0.349 | 0.105 | 9.57E-05 | Hematopo DOK1       |

|      |           |          |          |       |       |          |          |            |
|------|-----------|----------|----------|-------|-------|----------|----------|------------|
| 2918 | TIMM13    | 5.14E-09 | 0.606619 | 0.651 | 0.294 | 9.65E-05 | Hematopo | TIMM13     |
| 2919 | CAPG.1    | 5.17E-09 | 0.382979 | 0.571 | 0.211 | 9.71E-05 | Hematopo | CAPG       |
| 2920 | NRROS.1   | 5.36E-09 | 0.260938 | 0.365 | 0.111 | 0.000101 | Hematopo | NRROS      |
| 2921 | NCF1.1    | 5.37E-09 | -1.96789 | 0.143 | 0.485 | 0.000101 | Hematopo | NCF1       |
| 2922 | TCEAL3    | 5.43E-09 | 0.297819 | 0.222 | 0.053 | 0.000102 | Hematopo | TCEAL3     |
| 2923 | SCRN2.1   | 5.49E-09 | 0.261219 | 0.444 | 0.146 | 0.000103 | Hematopo | SCRN2      |
| 2924 | POLD2.1   | 5.54E-09 | 0.363139 | 0.492 | 0.176 | 0.000104 | Hematopo | POLD2      |
| 2925 | MT-ND3    | 5.56E-09 | 0.684707 | 1     | 0.971 | 0.000104 | Hematopo | MT-ND3     |
| 2926 | NENF      | 6.31E-09 | 0.328116 | 0.317 | 0.093 | 0.000119 | Hematopo | NENF       |
| 2927 | ENG       | 6.57E-09 | 0.336172 | 0.19  | 0.042 | 0.000123 | Hematopo | ENG        |
| 2928 | DYM       | 6.72E-09 | 0.277004 | 0.397 | 0.127 | 0.000126 | Hematopo | DYM        |
| 2929 | UCP2.1    | 6.77E-09 | -1.06328 | 0.635 | 0.78  | 0.000127 | Hematopo | UCP2       |
| 2930 | RPL17.1   | 7.63E-09 | 0.654478 | 0.984 | 0.712 | 0.000143 | Hematopo | RPL17      |
| 2931 | NDUFB5    | 8.36E-09 | 0.585351 | 0.746 | 0.351 | 0.000157 | Hematopo | NDUFB5     |
| 2932 | TMA16     | 8.54E-09 | 0.259857 | 0.254 | 0.066 | 0.00016  | Hematopo | TMA16      |
| 2933 | SEPT1.1   | 8.64E-09 | -1.23414 | 0.317 | 0.579 | 0.000162 | Hematopo | Sep-01     |
| 2934 | PNMA1     | 9.07E-09 | 0.253428 | 0.222 | 0.053 | 0.00017  | Hematopo | PNMA1      |
| 2935 | TXNIP.1   | 9.68E-09 | -1.05163 | 0.651 | 0.771 | 0.000182 | Hematopo | TXNIP      |
| 2936 | PTTG1IP.1 | 9.90E-09 | 0.317865 | 0.429 | 0.145 | 0.000186 | Hematopo | PTTG1IP    |
| 2937 | NOB1.1    | 1.01E-08 | 0.348789 | 0.556 | 0.208 | 0.00019  | Hematopo | NOB1       |
| 2938 | ABRAXAS1  | 1.09E-08 | 0.335643 | 0.381 | 0.123 | 0.000204 | Hematopo | ABRAXAS1   |
| 2939 | METAP2    | 1.11E-08 | 0.344833 | 0.524 | 0.193 | 0.000209 | Hematopo | METAP2     |
| 2940 | TUBB.1    | 1.14E-08 | 0.600195 | 0.921 | 0.581 | 0.000214 | Hematopo | TUBB       |
| 2941 | TMEM69    | 1.17E-08 | 0.274862 | 0.365 | 0.114 | 0.000219 | Hematopo | TMEM69     |
| 2942 | CHST12.1  | 1.28E-08 | 0.30102  | 0.444 | 0.154 | 0.00024  | Hematopo | CHST12     |
| 2943 | SRSF3     | 1.33E-08 | 0.586151 | 0.889 | 0.504 | 0.00025  | Hematopo | SRSF3      |
| 2944 | NUDT1     | 1.43E-08 | 0.354293 | 0.46  | 0.164 | 0.000268 | Hematopo | NUDT1      |
| 2945 | AC004556. | 1.43E-08 | 0.265869 | 0.317 | 0.094 | 0.000269 | Hematopo | AC004556.1 |
| 2946 | MRPS27.1  | 1.43E-08 | 0.358924 | 0.397 | 0.132 | 0.000269 | Hematopo | MRPS27     |
| 2947 | QTRT1.1   | 1.46E-08 | 0.423853 | 0.476 | 0.174 | 0.000275 | Hematopo | QTRT1      |
| 2948 | CD63.1    | 1.49E-08 | 0.31814  | 0.587 | 0.229 | 0.000281 | Hematopo | CD63       |
| 2949 | GABPB1    | 1.69E-08 | 0.272374 | 0.254 | 0.068 | 0.000317 | Hematopo | GABPB1     |
| 2950 | NCF4.1    | 1.70E-08 | 0.266798 | 0.46  | 0.162 | 0.000319 | Hematopo | NCF4       |
| 2951 | HMG3      | 1.75E-08 | 0.632776 | 0.825 | 0.448 | 0.000328 | Hematopo | HMG3       |
| 2952 | HSPA1A.1  | 1.75E-08 | 0.555436 | 0.429 | 0.158 | 0.00033  | Hematopo | HSPA1A     |
| 2953 | PHB.1     | 1.81E-08 | 0.524311 | 0.778 | 0.36  | 0.000339 | Hematopo | PHB        |
| 2954 | TUBA1C    | 1.83E-08 | 0.286819 | 0.333 | 0.102 | 0.000343 | Hematopo | TUBA1C     |
| 2955 | HSPB1.1   | 1.87E-08 | 0.628035 | 0.825 | 0.466 | 0.000351 | Hematopo | HSPB1      |
| 2956 | MLLT3.1   | 2.01E-08 | 0.387295 | 0.349 | 0.111 | 0.000378 | Hematopo | MLLT3      |
| 2957 | CDK4.1    | 2.03E-08 | 0.37939  | 0.571 | 0.222 | 0.000381 | Hematopo | CDK4       |
| 2958 | SMARCC1   | 2.07E-08 | 0.333658 | 0.381 | 0.126 | 0.000389 | Hematopo | SMARCC1    |
| 2959 | PCBP2.1   | 2.13E-08 | 0.510971 | 1     | 0.936 | 0.000401 | Hematopo | PCBP2      |
| 2960 | PLD3.1    | 2.20E-08 | 0.335386 | 0.556 | 0.21  | 0.000413 | Hematopo | PLD3       |
| 2961 | HPF1      | 2.26E-08 | 0.30001  | 0.349 | 0.11  | 0.000425 | Hematopo | HPF1       |
| 2962 | TBC1D10C  | 2.33E-08 | -1.12855 | 0.54  | 0.662 | 0.000437 | Hematopo | TBC1D10C   |
| 2963 | BCKDK.1   | 2.36E-08 | 0.273901 | 0.349 | 0.111 | 0.000443 | Hematopo | BCKDK      |
| 2964 | GSTO1.1   | 2.38E-08 | 0.38465  | 0.683 | 0.29  | 0.000448 | Hematopo | GSTO1      |

|      |          |          |          |       |       |          |                   |
|------|----------|----------|----------|-------|-------|----------|-------------------|
| 2965 | LSM2.1   | 2.42E-08 | 0.520753 | 0.746 | 0.375 | 0.000455 | Hematopo LSM2     |
| 2966 | SMIM30   | 2.81E-08 | 0.37751  | 0.175 | 0.039 | 0.000528 | Hematopo SMIM30   |
| 2967 | TMEM43   | 2.89E-08 | 0.265317 | 0.349 | 0.109 | 0.000543 | Hematopo TMEM43   |
| 2968 | TMEM205  | 2.94E-08 | 0.431314 | 0.444 | 0.162 | 0.000553 | Hematopo TMEM205  |
| 2969 | VEZT     | 3.22E-08 | 0.269756 | 0.254 | 0.069 | 0.000605 | Hematopo VEZT     |
| 2970 | FASTKD1  | 3.30E-08 | 0.26717  | 0.222 | 0.056 | 0.00062  | Hematopo FASTKD1  |
| 2971 | OLA1.1   | 3.46E-08 | 0.569804 | 0.667 | 0.31  | 0.00065  | Hematopo OLA1     |
| 2972 | SEPT9.1  | 3.58E-08 | -1.15468 | 0.349 | 0.584 | 0.000673 | Hematopo Sep-09   |
| 2973 | HSD17B4  | 3.74E-08 | 0.317855 | 0.365 | 0.121 | 0.000703 | Hematopo HSD17B4  |
| 2974 | TAF11    | 3.97E-08 | 0.301474 | 0.397 | 0.136 | 0.000746 | Hematopo TAF11    |
| 2975 | RIPOR2   | 3.98E-08 | -1.13458 | 0.333 | 0.597 | 0.000747 | Hematopo RIPOR2   |
| 2976 | ERG28.1  | 4.04E-08 | 0.303214 | 0.413 | 0.143 | 0.000759 | Hematopo ERG28    |
| 2977 | KEAP1    | 4.23E-08 | 0.293259 | 0.317 | 0.098 | 0.000794 | Hematopo KEAP1    |
| 2978 | CXXC5.1  | 4.45E-08 | 0.445702 | 0.397 | 0.14  | 0.000837 | Hematopo CXXC5    |
| 2979 | RHEB     | 4.60E-08 | 0.453927 | 0.556 | 0.224 | 0.000863 | Hematopo RHEB     |
| 2980 | RPL36.1  | 4.64E-08 | 0.458477 | 1     | 0.989 | 0.000871 | Hematopo RPL36    |
| 2981 | CLTA.1   | 4.68E-08 | 0.45043  | 0.889 | 0.425 | 0.000879 | Hematopo CLTA     |
| 2982 | ERI3     | 4.82E-08 | 0.270891 | 0.381 | 0.127 | 0.000906 | Hematopo ERI3     |
| 2983 | PIGP     | 5.06E-08 | 0.276854 | 0.413 | 0.143 | 0.00095  | Hematopo PIGP     |
| 2984 | TUBB6    | 5.24E-08 | 0.273868 | 0.206 | 0.051 | 0.000985 | Hematopo TUBB6    |
| 2985 | CUEDC2   | 5.28E-08 | 0.454639 | 0.587 | 0.249 | 0.000992 | Hematopo CUEDC2   |
| 2986 | SPECC1.1 | 5.49E-08 | 0.264592 | 0.127 | 0.023 | 0.001032 | Hematopo SPECC1   |
| 2987 | STARD3NL | 5.59E-08 | 0.298791 | 0.429 | 0.152 | 0.001051 | Hematopo STARD3NL |
| 2988 | TUBA1A.1 | 5.95E-08 | 0.821978 | 0.746 | 0.42  | 0.001118 | Hematopo TUBA1A   |
| 2989 | UBE2E1   | 6.18E-08 | 0.333326 | 0.397 | 0.139 | 0.001161 | Hematopo UBE2E1   |
| 2990 | STAM     | 6.41E-08 | 0.287929 | 0.238 | 0.064 | 0.001204 | Hematopo STAM     |
| 2991 | RPS7.1   | 6.64E-08 | 0.302863 | 1     | 0.993 | 0.001247 | Hematopo RPS7     |
| 2992 | AKIP1    | 6.79E-08 | 0.284768 | 0.222 | 0.059 | 0.001276 | Hematopo AKIP1    |
| 2993 | NBDY.1   | 6.85E-08 | 0.363274 | 0.587 | 0.24  | 0.001287 | Hematopo NBDY     |
| 2994 | LUC7L3.1 | 7.26E-08 | 0.554461 | 0.778 | 0.4   | 0.001364 | Hematopo LUC7L3   |
| 2995 | ACADVL   | 7.31E-08 | 0.435702 | 0.714 | 0.32  | 0.001374 | Hematopo ACADVL   |
| 2996 | DNAJC9.1 | 7.43E-08 | 0.284347 | 0.333 | 0.106 | 0.001397 | Hematopo DNAJC9   |
| 2997 | MRPL15   | 7.63E-08 | 0.312687 | 0.429 | 0.154 | 0.001433 | Hematopo MRPL15   |
| 2998 | DNAJB6   | 7.63E-08 | 0.451579 | 0.635 | 0.284 | 0.001434 | Hematopo DNAJB6   |
| 2999 | NACA.1   | 7.98E-08 | 0.326157 | 1     | 0.991 | 0.001499 | Hematopo NACA     |
| 3000 | PIIP5K2  | 8.12E-08 | 0.25163  | 0.333 | 0.107 | 0.001526 | Hematopo PIIP5K2  |
| 3001 | RPL3.1   | 8.62E-08 | 0.388777 | 1     | 0.986 | 0.001619 | Hematopo RPL3     |
| 3002 | ADD3.1   | 8.70E-08 | -1.15697 | 0.206 | 0.492 | 0.001634 | Hematopo ADD3     |
| 3003 | HMGCR    | 9.09E-08 | 0.257495 | 0.19  | 0.046 | 0.001707 | Hematopo HMGCR    |
| 3004 | FARSA    | 9.60E-08 | 0.346452 | 0.492 | 0.19  | 0.001804 | Hematopo FARSA    |
| 3005 | LAGE3    | 9.65E-08 | 0.357007 | 0.571 | 0.235 | 0.001812 | Hematopo LAGE3    |
| 3006 | YIPF2    | 1.06E-07 | 0.258186 | 0.254 | 0.073 | 0.002    | Hematopo YIPF2    |
| 3007 | HMG20B   | 1.07E-07 | 0.277179 | 0.492 | 0.185 | 0.002003 | Hematopo HMG20B   |
| 3008 | NUCB2.1  | 1.11E-07 | 0.627692 | 0.683 | 0.361 | 0.002084 | Hematopo NUCB2    |
| 3009 | IVD      | 1.12E-07 | 0.278332 | 0.286 | 0.087 | 0.002096 | Hematopo IVD      |
| 3010 | PSMG4    | 1.15E-07 | 0.299094 | 0.524 | 0.2   | 0.002166 | Hematopo PSMG4    |
| 3011 | PCED1A   | 1.22E-07 | 0.334054 | 0.317 | 0.101 | 0.002283 | Hematopo PCED1A   |

|      |          |          |          |       |       |          |          |          |
|------|----------|----------|----------|-------|-------|----------|----------|----------|
| 3012 | HMGB1.1  | 1.23E-07 | 0.546835 | 1     | 0.814 | 0.002317 | Hematopo | HMGB1    |
| 3013 | PSMG1    | 1.30E-07 | 0.286467 | 0.302 | 0.094 | 0.002434 | Hematopo | PSMG1    |
| 3014 | HSBP1.1  | 1.33E-07 | 0.444219 | 0.635 | 0.28  | 0.002504 | Hematopo | HSBP1    |
| 3015 | LIPA     | 1.40E-07 | 0.318258 | 0.46  | 0.173 | 0.002623 | Hematopo | LIPA     |
| 3016 | IMMP1L   | 1.41E-07 | 0.251365 | 0.27  | 0.08  | 0.00265  | Hematopo | IMMP1L   |
| 3017 | ITM2B.1  | 1.42E-07 | -0.76347 | 0.857 | 0.885 | 0.002673 | Hematopo | ITM2B    |
| 3018 | ZNF428.1 | 1.48E-07 | 0.49068  | 0.73  | 0.326 | 0.002771 | Hematopo | ZNF428   |
| 3019 | EI24     | 1.49E-07 | 0.254057 | 0.333 | 0.109 | 0.00279  | Hematopo | EI24     |
| 3020 | GGCT     | 1.57E-07 | 0.30679  | 0.397 | 0.141 | 0.002952 | Hematopo | GGCT     |
| 3021 | SOCS3.1  | 1.60E-07 | 0.496258 | 0.413 | 0.16  | 0.003009 | Hematopo | SOCS3    |
| 3022 | CSF2RB.1 | 1.64E-07 | 0.289047 | 0.143 | 0.03  | 0.003086 | Hematopo | CSF2RB   |
| 3023 | ERGIC3   | 1.66E-07 | 0.565043 | 0.698 | 0.36  | 0.003127 | Hematopo | ERGIC3   |
| 3024 | NAA20    | 1.69E-07 | 0.309615 | 0.556 | 0.222 | 0.003171 | Hematopo | NAA20    |
| 3025 | HMGB2.1  | 1.79E-07 | 0.302429 | 0.635 | 0.27  | 0.00337  | Hematopo | HMGB2    |
| 3026 | CAMK4.1  | 1.90E-07 | -1.16869 | 0     | 0.311 | 0.003568 | Hematopo | CAMK4    |
| 3027 | INSIG1.1 | 1.94E-07 | 0.339803 | 0.349 | 0.12  | 0.003641 | Hematopo | INSIG1   |
| 3028 | NDUFS4   | 2.16E-07 | 0.313005 | 0.397 | 0.145 | 0.004064 | Hematopo | NDUFS4   |
| 3029 | MRPS24   | 2.19E-07 | 0.336389 | 0.508 | 0.203 | 0.004118 | Hematopo | MRPS24   |
| 3030 | CPT1A    | 2.25E-07 | 0.302551 | 0.254 | 0.074 | 0.004227 | Hematopo | CPT1A    |
| 3031 | LST1.1   | 2.43E-07 | -0.33071 | 0.46  | 0.169 | 0.004563 | Hematopo | LST1     |
| 3032 | HLA-DRA  | 2.44E-07 | -0.39637 | 0.952 | 0.403 | 0.004585 | Hematopo | HLA-DRA  |
| 3033 | HDAC2.1  | 2.52E-07 | 0.325926 | 0.619 | 0.26  | 0.004743 | Hematopo | HDAC2    |
| 3034 | FLT3LG.1 | 2.74E-07 | -1.21331 | 0.079 | 0.39  | 0.005156 | Hematopo | FLT3LG   |
| 3035 | NIPSNAP2 | 2.76E-07 | 0.30299  | 0.413 | 0.153 | 0.005187 | Hematopo | NIPSNAP2 |
| 3036 | CLEC2D.1 | 2.77E-07 | -1.0699  | 0.016 | 0.321 | 0.005197 | Hematopo | CLEC2D   |
| 3037 | CAPRIN1  | 2.90E-07 | 0.317834 | 0.46  | 0.178 | 0.005455 | Hematopo | CAPRIN1  |
| 3038 | MRPL9.1  | 2.91E-07 | 0.260842 | 0.556 | 0.219 | 0.00546  | Hematopo | MRPL9    |
| 3039 | CCNG1.1  | 2.94E-07 | 0.424674 | 0.508 | 0.213 | 0.00553  | Hematopo | CCNG1    |
| 3040 | MEF2C    | 3.01E-07 | 0.389576 | 0.508 | 0.212 | 0.005654 | Hematopo | MEF2C    |
| 3041 | CD2.1    | 3.08E-07 | -1.16798 | 0.016 | 0.32  | 0.005793 | Hematopo | CD2      |
| 3042 | ZFAND1.1 | 3.09E-07 | 0.371585 | 0.508 | 0.207 | 0.00581  | Hematopo | ZFAND1   |
| 3043 | TCEAL8   | 3.14E-07 | 0.282685 | 0.349 | 0.12  | 0.005902 | Hematopo | TCEAL8   |
| 3044 | MPC2     | 3.17E-07 | 0.339306 | 0.603 | 0.257 | 0.005963 | Hematopo | MPC2     |
| 3045 | NDUFA11  | 3.34E-07 | 0.552545 | 0.841 | 0.46  | 0.006274 | Hematopo | NDUFA11  |
| 3046 | MALAT1.1 | 3.43E-07 | -0.70709 | 0.984 | 0.996 | 0.006439 | Hematopo | MALAT1   |
| 3047 | PTRHD1.1 | 3.53E-07 | 0.425327 | 0.587 | 0.261 | 0.00663  | Hematopo | PTRHD1   |
| 3048 | RPS8.1   | 3.58E-07 | 0.393673 | 1     | 0.992 | 0.006716 | Hematopo | RPS8     |
| 3049 | GMPR2    | 3.61E-07 | 0.285558 | 0.444 | 0.168 | 0.006787 | Hematopo | GMPR2    |
| 3050 | CFAP97.1 | 3.69E-07 | 0.287003 | 0.397 | 0.145 | 0.006925 | Hematopo | CFAP97   |
| 3051 | DDX5.1   | 3.76E-07 | -0.76539 | 0.873 | 0.847 | 0.007055 | Hematopo | DDX5     |
| 3052 | RPL39.1  | 3.82E-07 | 0.592473 | 1     | 0.997 | 0.007176 | Hematopo | RPL39    |
| 3053 | ERCC1    | 3.91E-07 | 0.390461 | 0.46  | 0.184 | 0.007337 | Hematopo | ERCC1    |
| 3054 | S1PR1.1  | 3.92E-07 | -1.01315 | 0.063 | 0.376 | 0.00736  | Hematopo | S1PR1    |
| 3055 | ING4.1   | 3.99E-07 | 0.293635 | 0.524 | 0.21  | 0.007492 | Hematopo | ING4     |
| 3056 | SMIM8    | 4.04E-07 | 0.262028 | 0.206 | 0.056 | 0.007594 | Hematopo | SMIM8    |
| 3057 | OGT      | 4.14E-07 | 0.273901 | 0.492 | 0.193 | 0.007769 | Hematopo | OGT      |
| 3058 | KDELR1   | 4.27E-07 | 0.603018 | 0.635 | 0.323 | 0.008028 | Hematopo | KDELR1   |

|      |           |          |          |       |       |          |          |          |
|------|-----------|----------|----------|-------|-------|----------|----------|----------|
| 3059 | VIPAS39   | 4.35E-07 | 0.260366 | 0.175 | 0.043 | 0.008165 | Hematopo | VIPAS39  |
| 3060 | DNM1L     | 4.41E-07 | 0.278646 | 0.27  | 0.084 | 0.008292 | Hematopo | DNM1L    |
| 3061 | SLC25A36  | 4.45E-07 | 0.301672 | 0.381 | 0.139 | 0.008368 | Hematopo | SLC25A36 |
| 3062 | CD48.1    | 4.54E-07 | -1.04369 | 0.127 | 0.416 | 0.008524 | Hematopo | CD48     |
| 3063 | RPL37A.1  | 4.56E-07 | 0.52553  | 1     | 0.837 | 0.008562 | Hematopo | RPL37A   |
| 3064 | NTPCR     | 4.59E-07 | 0.294345 | 0.302 | 0.099 | 0.008622 | Hematopo | NTPCR    |
| 3065 | TNFRSF1A. | 4.63E-07 | 0.27486  | 0.476 | 0.185 | 0.008688 | Hematopo | TNFRSF1A |
| 3066 | SRI.1     | 4.70E-07 | 0.451961 | 0.778 | 0.384 | 0.008822 | Hematopo | SRI      |
| 3067 | PCED1B.1  | 4.72E-07 | -1.10091 | 0     | 0.296 | 0.008872 | Hematopo | PCED1B   |
| 3068 | YIF1B.1   | 4.74E-07 | 0.426712 | 0.492 | 0.192 | 0.008898 | Hematopo | YIF1B    |
| 3069 | LAMTOR2.  | 4.80E-07 | 0.359686 | 0.683 | 0.299 | 0.009018 | Hematopo | LAMTOR2  |
| 3070 | RPS3A.1   | 4.87E-07 | 0.37948  | 1     | 0.991 | 0.009145 | Hematopo | RPS3A    |
| 3071 | RERE      | 5.32E-07 | 0.250309 | 0.302 | 0.099 | 0.009985 | Hematopo | RERE     |
| 3072 | YWHAH.1   | 5.54E-07 | 0.377094 | 0.381 | 0.144 | 0.010412 | Hematopo | YWHAH    |
| 3073 | DENND2D.  | 5.54E-07 | -1.19183 | 0.127 | 0.409 | 0.010416 | Hematopo | DENND2D  |
| 3074 | FDX1      | 5.59E-07 | 0.286614 | 0.524 | 0.212 | 0.010496 | Hematopo | FDX1     |
| 3075 | KLF6.1    | 5.71E-07 | 0.573926 | 0.651 | 0.319 | 0.010729 | Hematopo | KLF6     |
| 3076 | LSM7.1    | 5.82E-07 | 0.553804 | 0.921 | 0.641 | 0.010933 | Hematopo | LSM7     |
| 3077 | KTN1      | 6.00E-07 | 0.403877 | 0.698 | 0.327 | 0.011277 | Hematopo | KTN1     |
| 3078 | RPS28.1   | 6.07E-07 | 0.357358 | 1     | 0.995 | 0.011407 | Hematopo | RPS28    |
| 3079 | ATP5F1C   | 6.28E-07 | 0.468676 | 0.873 | 0.535 | 0.011795 | Hematopo | ATP5F1C  |
| 3080 | CANX.1    | 6.29E-07 | 0.423351 | 0.635 | 0.298 | 0.011823 | Hematopo | CANX     |
| 3081 | FAM160B1  | 6.52E-07 | 0.259746 | 0.206 | 0.057 | 0.012251 | Hematopo | FAM160B1 |
| 3082 | ATG4C     | 6.56E-07 | 0.264868 | 0.254 | 0.078 | 0.012316 | Hematopo | ATG4C    |
| 3083 | ALOX5AP.1 | 6.64E-07 | -1.25462 | 0.063 | 0.361 | 0.012479 | Hematopo | ALOX5AP  |
| 3084 | KMT2A     | 6.83E-07 | 0.312206 | 0.349 | 0.124 | 0.012837 | Hematopo | KMT2A    |
| 3085 | RSL24D1.1 | 7.36E-07 | 0.520222 | 0.889 | 0.547 | 0.013819 | Hematopo | RSL24D1  |
| 3086 | TRBC1.1   | 7.58E-07 | -1.59651 | 0.016 | 0.304 | 0.014238 | Hematopo | TRBC1    |
| 3087 | CYTIP.1   | 7.59E-07 | -1.03144 | 0.254 | 0.504 | 0.014251 | Hematopo | CYTIP    |
| 3088 | DCAF13    | 7.95E-07 | 0.255536 | 0.381 | 0.139 | 0.014925 | Hematopo | DCAF13   |
| 3089 | DPM3      | 8.37E-07 | 0.377349 | 0.556 | 0.246 | 0.015722 | Hematopo | DPM3     |
| 3090 | ZAP70.1   | 8.97E-07 | -1.18716 | 0.095 | 0.375 | 0.016843 | Hematopo | ZAP70    |
| 3091 | SUMO2     | 9.61E-07 | 0.454392 | 1     | 0.845 | 0.018047 | Hematopo | SUMO2    |
| 3092 | CLNS1A.1  | 9.86E-07 | 0.499499 | 0.746 | 0.404 | 0.018528 | Hematopo | CLNS1A   |
| 3093 | BRWD1     | 1.01E-06 | 0.280087 | 0.444 | 0.174 | 0.018887 | Hematopo | BRWD1    |
| 3094 | CHD9      | 1.01E-06 | 0.32665  | 0.413 | 0.161 | 0.018968 | Hematopo | CHD9     |
| 3095 | NAA38.1   | 1.05E-06 | 0.754848 | 0.714 | 0.395 | 0.019765 | Hematopo | NAA38    |
| 3096 | ACTR3     | 1.05E-06 | -0.91361 | 0.556 | 0.664 | 0.019816 | Hematopo | ACTR3    |
| 3097 | OAZ1.1    | 1.07E-06 | -0.74322 | 0.968 | 0.938 | 0.020149 | Hematopo | OAZ1     |
| 3098 | MRPL45    | 1.09E-06 | 0.360857 | 0.349 | 0.13  | 0.02049  | Hematopo | MRPL45   |
| 3099 | CCDC28B   | 1.11E-06 | 0.261014 | 0.222 | 0.065 | 0.020836 | Hematopo | CCDC28B  |
| 3100 | CTSW.1    | 1.15E-06 | -0.53578 | 0.635 | 0.253 | 0.021607 | Hematopo | CTSW     |
| 3101 | KATNBL1   | 1.19E-06 | 0.25496  | 0.317 | 0.11  | 0.02241  | Hematopo | KATNBL1  |
| 3102 | SPOCK2.1  | 1.22E-06 | -1.08411 | 0.048 | 0.328 | 0.022941 | Hematopo | SPOCK2   |
| 3103 | HCLS1.1   | 1.29E-06 | -0.8877  | 0.571 | 0.665 | 0.024224 | Hematopo | HCLS1    |
| 3104 | TNFRSF4   | 1.38E-06 | 0.393857 | 0.127 | 0.027 | 0.026014 | Hematopo | TNFRSF4  |
| 3105 | ABHD14B.: | 1.40E-06 | 0.481296 | 0.683 | 0.339 | 0.026382 | Hematopo | ABHD14B  |

|      |           |          |          |       |       |          |            |          |
|------|-----------|----------|----------|-------|-------|----------|------------|----------|
| 3106 | TUBB4B    | 1.43E-06 | 0.315976 | 0.492 | 0.202 | 0.026777 | Hematopo   | TUBB4B   |
| 3107 | SNHG12.1  | 1.48E-06 | 0.345902 | 0.365 | 0.138 | 0.027872 | Hematopo   | SNHG12   |
| 3108 | C12orf45  | 1.50E-06 | 0.267487 | 0.238 | 0.074 | 0.028204 | Hematopo   | C12orf45 |
| 3109 | FAM45A.1  | 1.52E-06 | 0.294885 | 0.333 | 0.122 | 0.02864  | Hematopo   | FAM45A   |
| 3110 | UBB.1     | 1.54E-06 | 0.400952 | 0.968 | 0.805 | 0.028941 | Hematopo   | UBB      |
| 3111 | PBXIP1.1  | 1.55E-06 | 0.391591 | 0.476 | 0.204 | 0.029058 | Hematopo   | PBXIP1   |
| 3112 | VAPA      | 1.55E-06 | 0.546799 | 0.778 | 0.463 | 0.029139 | Hematopo   | VAPA     |
| 3113 | CCND3     | 1.57E-06 | -1.06768 | 0.46  | 0.588 | 0.02946  | Hematopo   | CCND3    |
| 3114 | MT-ND2.1  | 1.75E-06 | 0.530364 | 0.968 | 0.849 | 0.032899 | Hematopo   | MT-ND2   |
| 3115 | FIS1      | 1.81E-06 | 0.494946 | 0.889 | 0.521 | 0.033959 | Hematopo   | FIS1     |
| 3116 | MMADHC    | 1.84E-06 | 0.405248 | 0.698 | 0.333 | 0.03452  | Hematopo   | MMADHC   |
| 3117 | RTRAF     | 1.85E-06 | 0.51798  | 0.857 | 0.547 | 0.034689 | Hematopo   | RTRAF    |
| 3118 | GCHFR     | 2.03E-06 | 0.252199 | 0.317 | 0.113 | 0.038163 | Hematopo   | GCHFR    |
| 3119 | DSTN      | 2.13E-06 | 0.277022 | 0.619 | 0.273 | 0.040004 | Hematopo   | DSTN     |
| 3120 | HSPA8.1   | 2.15E-06 | -0.73333 | 0.889 | 0.866 | 0.040323 | Hematopo   | HSPA8    |
| 3121 | AK2       | 2.22E-06 | 0.302014 | 0.492 | 0.208 | 0.041627 | Hematopo   | AK2      |
| 3122 | MFSD1.1   | 2.34E-06 | 0.288016 | 0.46  | 0.189 | 0.04405  | Hematopo   | MFSD1    |
| 3123 | FKBP1A.1  | 2.41E-06 | 0.490808 | 0.889 | 0.583 | 0.04533  | Hematopo   | FKBP1A   |
| 3124 | CNOT10    | 2.46E-06 | 0.287519 | 0.27  | 0.091 | 0.046188 | Hematopo   | CNOT10   |
| 3125 | ROMO1.1   | 2.48E-06 | 0.490488 | 0.794 | 0.435 | 0.046495 | Hematopo   | ROMO1    |
| 3126 | UBE2E3    | 2.51E-06 | 0.269022 | 0.46  | 0.189 | 0.047065 | Hematopo   | UBE2E3   |
| 3127 | RPL22L1.1 | 2.52E-06 | 0.478175 | 0.794 | 0.463 | 0.047276 | Hematopo   | RPL22L1  |
| 3128 | CSNK2B    | 2.55E-06 | 0.277896 | 0.349 | 0.131 | 0.047812 | Hematopo   | CSNK2B   |
| 3129 | RIF1      | 2.60E-06 | 0.31354  | 0.254 | 0.083 | 0.048931 | Hematopo   | RIF1     |
| 3509 | JCHAIN.1  | 0        | 6.468285 | 0.995 | 0.1   | 0        | Plasma cel | JCHAIN   |
| 3510 | IGHA1     | 0        | 5.819356 | 0.871 | 0.053 | 0        | Plasma cel | IGHA1    |
| 3511 | IGKC.1    | 0        | 5.354223 | 0.67  | 0.154 | 0        | Plasma cel | IGKC     |
| 3512 | IGLV3-1   | 0        | 5.062866 | 0.349 | 0.014 | 0        | Plasma cel | IGLV3-1  |
| 3513 | IGKV4-1   | 0        | 4.981074 | 0.321 | 0.029 | 0        | Plasma cel | IGKV4-1  |
| 3514 | MZB1.2    | 0        | 4.419811 | 1     | 0.108 | 0        | Plasma cel | MZB1     |
| 3515 | IGHA2     | 0        | 4.365195 | 0.576 | 0.013 | 0        | Plasma cel | IGHA2    |
| 3516 | IGHG1     | 0        | 4.257036 | 0.413 | 0.029 | 0        | Plasma cel | IGHG1    |
| 3517 | IGKV1-6   | 0        | 4.130037 | 0.119 | 0.004 | 0        | Plasma cel | IGKV1-6  |
| 3518 | HSP90B1.1 | 0        | 3.553627 | 0.998 | 0.499 | 0        | Plasma cel | HSP90B1  |
| 3519 | SEC11C    | 0        | 2.929788 | 0.98  | 0.256 | 0        | Plasma cel | SEC11C   |
| 3520 | DERL3     | 0        | 2.908287 | 0.984 | 0.056 | 0        | Plasma cel | DERL3    |
| 3521 | IGHG4     | 0        | 2.831799 | 0.321 | 0.008 | 0        | Plasma cel | IGHG4    |
| 3522 | PPIB      | 0        | 2.78569  | 1     | 0.788 | 0        | Plasma cel | PPIB     |
| 3523 | FKBP11.1  | 0        | 2.693441 | 0.986 | 0.165 | 0        | Plasma cel | FKBP11   |
| 3524 | ITM2C.1   | 0        | 2.580779 | 0.98  | 0.14  | 0        | Plasma cel | ITM2C    |
| 3525 | IGLL5     | 0        | 2.576368 | 0.773 | 0.08  | 0        | Plasma cel | IGLL5    |
| 3526 | TNFRSF17  | 0        | 2.503611 | 0.961 | 0.014 | 0        | Plasma cel | TNFRSF17 |
| 3527 | SSR3.1    | 0        | 2.497574 | 0.993 | 0.274 | 0        | Plasma cel | SSR3     |
| 3528 | TXNDC5    | 0        | 2.491693 | 0.941 | 0.004 | 0        | Plasma cel | TXNDC5   |
| 3529 | MYDGF     | 0        | 2.43487  | 0.982 | 0.289 | 0        | Plasma cel | MYDGF    |
| 3530 | HSPA5.1   | 0        | 2.412421 | 0.982 | 0.384 | 0        | Plasma cel | HSPA5    |
| 3531 | XBP1.1    | 0        | 2.411455 | 0.995 | 0.358 | 0        | Plasma cel | XBP1     |

|                 |   |          |       |       |                         |
|-----------------|---|----------|-------|-------|-------------------------|
| 3532 UBE2J1.1   | 0 | 2.3178   | 0.98  | 0.247 | 0 Plasma cel UBE2J1     |
| 3533 SDF2L1     | 0 | 2.244369 | 0.965 | 0.201 | 0 Plasma cel SDF2L1     |
| 3534 PDIA4.1    | 0 | 2.161198 | 0.993 | 0.212 | 0 Plasma cel PDIA4      |
| 3535 SUB1       | 0 | 2.158294 | 0.991 | 0.768 | 0 Plasma cel SUB1       |
| 3536 PDIA6.1    | 0 | 2.10482  | 0.975 | 0.359 | 0 Plasma cel PDIA6      |
| 3537 SSR4       | 0 | 2.081834 | 1     | 0.68  | 0 Plasma cel SSR4       |
| 3538 SPCS3.1    | 0 | 2.0069   | 0.975 | 0.209 | 0 Plasma cel SPCS3      |
| 3539 SEC61B.1   | 0 | 1.92263  | 0.989 | 0.574 | 0 Plasma cel SEC61B     |
| 3540 LMAN1.1    | 0 | 1.877216 | 0.97  | 0.183 | 0 Plasma cel LMAN1      |
| 3541 KDELR2     | 0 | 1.804698 | 0.959 | 0.249 | 0 Plasma cel KDELR2     |
| 3542 MANF.1     | 0 | 1.775402 | 0.952 | 0.142 | 0 Plasma cel MANF       |
| 3543 CD38.1     | 0 | 1.768279 | 0.952 | 0.097 | 0 Plasma cel CD38       |
| 3544 HM13.1     | 0 | 1.71243  | 0.98  | 0.307 | 0 Plasma cel HM13       |
| 3545 PRDX4.1    | 0 | 1.677621 | 0.931 | 0.131 | 0 Plasma cel PRDX4      |
| 3546 POU2AF1.1  | 0 | 1.662072 | 0.956 | 0.084 | 0 Plasma cel POU2AF1    |
| 3547 SPCS2.1    | 0 | 1.657233 | 0.991 | 0.412 | 0 Plasma cel SPCS2      |
| 3548 CRELD2     | 0 | 1.580573 | 0.947 | 0.131 | 0 Plasma cel CRELD2     |
| 3549 IGHV6-1    | 0 | 1.574979 | 0.262 | 0.004 | 0 Plasma cel IGHV6-1    |
| 3550 TENT5C     | 0 | 1.571276 | 0.94  | 0.044 | 0 Plasma cel TENT5C     |
| 3551 DNAJB11    | 0 | 1.559991 | 0.941 | 0.131 | 0 Plasma cel DNAJB11    |
| 3552 SELENOS.1  | 0 | 1.425188 | 0.949 | 0.167 | 0 Plasma cel SELENOS    |
| 3553 AQP3.2     | 0 | 1.42404  | 0.915 | 0.226 | 0 Plasma cel AQP3       |
| 3554 TYMS       | 0 | 1.406877 | 0.466 | 0.01  | 0 Plasma cel TYMS       |
| 3555 TXNDC11    | 0 | 1.395362 | 0.924 | 0.075 | 0 Plasma cel TXNDC11    |
| 3556 IRF4       | 0 | 1.392134 | 0.762 | 0.032 | 0 Plasma cel IRF4       |
| 3557 ERLEC1     | 0 | 1.390431 | 0.957 | 0.167 | 0 Plasma cel ERLEC1     |
| 3558 FKBP2      | 0 | 1.359982 | 0.968 | 0.282 | 0 Plasma cel FKBP2      |
| 3559 FABP5.1    | 0 | 1.302573 | 0.775 | 0.087 | 0 Plasma cel FABP5      |
| 3560 WARS.1     | 0 | 1.230857 | 0.881 | 0.124 | 0 Plasma cel WARS       |
| 3561 LRRC59     | 0 | 1.216225 | 0.876 | 0.12  | 0 Plasma cel LRRC59     |
| 3562 RRBP1.1    | 0 | 1.197685 | 0.874 | 0.077 | 0 Plasma cel RRBP1      |
| 3563 GMPPB      | 0 | 1.170409 | 0.887 | 0.052 | 0 Plasma cel GMPPB      |
| 3564 SRM        | 0 | 1.100548 | 0.835 | 0.082 | 0 Plasma cel SRM        |
| 3565 SEC61A1    | 0 | 1.089556 | 0.91  | 0.154 | 0 Plasma cel SEC61A1    |
| 3566 DERL1      | 0 | 1.074839 | 0.92  | 0.171 | 0 Plasma cel DERL1      |
| 3567 ZBP1       | 0 | 1.063401 | 0.851 | 0.061 | 0 Plasma cel ZBP1       |
| 3568 HDLBP.1    | 0 | 1.051951 | 0.911 | 0.131 | 0 Plasma cel HDLBP      |
| 3569 VOPP1      | 0 | 1.047448 | 0.913 | 0.164 | 0 Plasma cel VOPP1      |
| 3570 ELL2       | 0 | 1.043464 | 0.814 | 0.014 | 0 Plasma cel ELL2       |
| 3571 STT3A      | 0 | 1.042103 | 0.863 | 0.092 | 0 Plasma cel STT3A      |
| 3572 PTTG1      | 0 | 1.02084  | 0.59  | 0.04  | 0 Plasma cel PTTG1      |
| 3573 ABCB9      | 0 | 1.006779 | 0.715 | 0.004 | 0 Plasma cel ABCB9      |
| 3574 GGH        | 0 | 1.000087 | 0.67  | 0.014 | 0 Plasma cel GGH        |
| 3575 HRASLS2    | 0 | 0.99945  | 0.663 | 0.007 | 0 Plasma cel HRASLS2    |
| 3576 EAF2       | 0 | 0.994981 | 0.929 | 0.153 | 0 Plasma cel EAF2       |
| 3577 AL133467.1 | 0 | 0.992519 | 0.778 | 0.009 | 0 Plasma cel AL133467.1 |
| 3578 SRPRB      | 0 | 0.984119 | 0.892 | 0.107 | 0 Plasma cel SRPRB      |



|                |   |          |       |       |                         |
|----------------|---|----------|-------|-------|-------------------------|
| 3579 MLEC      | 0 | 0.981893 | 0.885 | 0.12  | 0 Plasma cel MLEC       |
| 3580 TMEM208   | 0 | 0.981023 | 0.929 | 0.199 | 0 Plasma cel TMEM208    |
| 3581 SLC35B1   | 0 | 0.975921 | 0.853 | 0.093 | 0 Plasma cel SLC35B1    |
| 3582 DCPS      | 0 | 0.949655 | 0.871 | 0.139 | 0 Plasma cel DCPS       |
| 3583 MTHFD2.1  | 0 | 0.945618 | 0.832 | 0.128 | 0 Plasma cel MTHFD2     |
| 3584 LILRB4.1  | 0 | 0.941729 | 0.72  | 0.042 | 0 Plasma cel LILRB4     |
| 3585 NANS.1    | 0 | 0.938472 | 0.856 | 0.092 | 0 Plasma cel NANS       |
| 3586 DNAJC3.1  | 0 | 0.931752 | 0.908 | 0.139 | 0 Plasma cel DNAJC3     |
| 3587 HIST1H1B  | 0 | 0.924792 | 0.376 | 0.013 | 0 Plasma cel HIST1H1B   |
| 3588 GAS6.1    | 0 | 0.918518 | 0.649 | 0.015 | 0 Plasma cel GAS6       |
| 3589 SLC38A5   | 0 | 0.916761 | 0.759 | 0.042 | 0 Plasma cel SLC38A5    |
| 3590 AC012236. | 0 | 0.91202  | 0.796 | 0.029 | 0 Plasma cel AC012236.1 |
| 3591 CKAP4.1   | 0 | 0.907833 | 0.833 | 0.054 | 0 Plasma cel CKAP4      |
| 3592 CYTOR.2   | 0 | 0.885048 | 0.862 | 0.092 | 0 Plasma cel CYTOR      |
| 3593 TXNDC15   | 0 | 0.882634 | 0.887 | 0.118 | 0 Plasma cel TXNDC15    |
| 3594 UBE2C     | 0 | 0.877121 | 0.356 | 0.005 | 0 Plasma cel UBE2C      |
| 3595 PRDM1     | 0 | 0.873946 | 0.773 | 0.031 | 0 Plasma cel PRDM1      |
| 3596 UAP1      | 0 | 0.86435  | 0.787 | 0.055 | 0 Plasma cel UAP1       |
| 3597 CHPF      | 0 | 0.863372 | 0.78  | 0.02  | 0 Plasma cel CHPF       |
| 3598 SEMA4A.1  | 0 | 0.849375 | 0.807 | 0.03  | 0 Plasma cel SEMA4A     |
| 3599 GYG1.1    | 0 | 0.841196 | 0.812 | 0.158 | 0 Plasma cel GYG1       |
| 3600 BIK       | 0 | 0.802407 | 0.674 | 0.015 | 0 Plasma cel BIK        |
| 3601 CISD2     | 0 | 0.798685 | 0.894 | 0.155 | 0 Plasma cel CISD2      |
| 3602 SEL1L3    | 0 | 0.798542 | 0.796 | 0.062 | 0 Plasma cel SEL1L3     |
| 3603 ENTPD1.1  | 0 | 0.788263 | 0.782 | 0.039 | 0 Plasma cel ENTPD1     |
| 3604 PREB      | 0 | 0.787863 | 0.878 | 0.16  | 0 Plasma cel PREB       |
| 3605 MYBL2     | 0 | 0.78403  | 0.564 | 0.01  | 0 Plasma cel MYBL2      |
| 3606 CCDC167   | 0 | 0.776086 | 0.849 | 0.127 | 0 Plasma cel CCDC167    |
| 3607 HYOU1     | 0 | 0.774774 | 0.739 | 0.046 | 0 Plasma cel HYOU1      |
| 3608 NME1.1    | 0 | 0.774118 | 0.784 | 0.108 | 0 Plasma cel NME1       |
| 3609 ISOC2     | 0 | 0.770953 | 0.832 | 0.086 | 0 Plasma cel ISOC2      |
| 3610 SEC14L1.1 | 0 | 0.769463 | 0.894 | 0.147 | 0 Plasma cel SEC14L1    |
| 3611 SLAMF7    | 0 | 0.766407 | 0.81  | 0.043 | 0 Plasma cel SLAMF7     |
| 3612 CALU      | 0 | 0.751364 | 0.798 | 0.069 | 0 Plasma cel CALU       |
| 3613 ALG5      | 0 | 0.748572 | 0.869 | 0.138 | 0 Plasma cel ALG5       |
| 3614 TNFRSF13B | 0 | 0.74766  | 0.743 | 0.034 | 0 Plasma cel TNFRSF13B  |
| 3615 TOR3A     | 0 | 0.743445 | 0.844 | 0.13  | 0 Plasma cel TOR3A      |
| 3616 CDC20     | 0 | 0.733691 | 0.346 | 0.004 | 0 Plasma cel CDC20      |
| 3617 SAR1B     | 0 | 0.733228 | 0.862 | 0.127 | 0 Plasma cel SAR1B      |
| 3618 RRM2      | 0 | 0.728161 | 0.365 | 0.006 | 0 Plasma cel RRM2       |
| 3619 PHGDH.1   | 0 | 0.723096 | 0.567 | 0.033 | 0 Plasma cel PHGDH      |
| 3620 TK1       | 0 | 0.697883 | 0.461 | 0.008 | 0 Plasma cel TK1        |
| 3621 ST6GALNA  | 0 | 0.696197 | 0.78  | 0.068 | 0 Plasma cel ST6GALNAC4 |
| 3622 EDEM2     | 0 | 0.694037 | 0.84  | 0.1   | 0 Plasma cel EDEM2      |
| 3623 TIMM17A   | 0 | 0.685222 | 0.791 | 0.14  | 0 Plasma cel TIMM17A    |
| 3624 SPATS2    | 0 | 0.679241 | 0.764 | 0.028 | 0 Plasma cel SPATS2     |
| 3625 CKS2.1    | 0 | 0.674196 | 0.615 | 0.081 | 0 Plasma cel CKS2       |

|      |           |   |          |       |       |   |                        |
|------|-----------|---|----------|-------|-------|---|------------------------|
| 3626 | CD320.1   | 0 | 0.66982  | 0.768 | 0.125 | 0 | Plasma cel CD320       |
| 3627 | B4GALT3   | 0 | 0.664701 | 0.876 | 0.157 | 0 | Plasma cel B4GALT3     |
| 3628 | SLC25A4   | 0 | 0.660307 | 0.677 | 0.039 | 0 | Plasma cel SLC25A4     |
| 3629 | GNG7.1    | 0 | 0.659758 | 0.778 | 0.092 | 0 | Plasma cel GNG7        |
| 3630 | HSPA13    | 0 | 0.654266 | 0.761 | 0.048 | 0 | Plasma cel HSPA13      |
| 3631 | MAN1A1.1  | 0 | 0.651003 | 0.702 | 0.025 | 0 | Plasma cel MAN1A1      |
| 3632 | SGK1.1    | 0 | 0.647791 | 0.436 | 0.028 | 0 | Plasma cel SGK1        |
| 3633 | IFI27L1   | 0 | 0.644207 | 0.707 | 0.027 | 0 | Plasma cel IFI27L1     |
| 3634 | SMC4      | 0 | 0.642598 | 0.665 | 0.096 | 0 | Plasma cel SMC4        |
| 3635 | MCUR1     | 0 | 0.635183 | 0.821 | 0.095 | 0 | Plasma cel MCUR1       |
| 3636 | LAMP5     | 0 | 0.627725 | 0.379 | 0.005 | 0 | Plasma cel LAMP5       |
| 3637 | UBA5      | 0 | 0.624153 | 0.807 | 0.089 | 0 | Plasma cel UBA5        |
| 3638 | DNAJC1.1  | 0 | 0.619224 | 0.821 | 0.133 | 0 | Plasma cel DNAJC1      |
| 3639 | GMPPA     | 0 | 0.618569 | 0.755 | 0.08  | 0 | Plasma cel GMPPA       |
| 3640 | GINS2     | 0 | 0.608574 | 0.39  | 0.01  | 0 | Plasma cel GINS2       |
| 3641 | BIRC5     | 0 | 0.601965 | 0.427 | 0.005 | 0 | Plasma cel BIRC5       |
| 3642 | CCNB1     | 0 | 0.599686 | 0.378 | 0.016 | 0 | Plasma cel CCNB1       |
| 3643 | ZNF593    | 0 | 0.588931 | 0.849 | 0.13  | 0 | Plasma cel ZNF593      |
| 3644 | MANEA     | 0 | 0.588453 | 0.711 | 0.034 | 0 | Plasma cel MANEA       |
| 3645 | HMGB3     | 0 | 0.5855   | 0.539 | 0.015 | 0 | Plasma cel HMGB3       |
| 3646 | CASP3.1   | 0 | 0.585268 | 0.798 | 0.093 | 0 | Plasma cel CASP3       |
| 3647 | MIR4435-2 | 0 | 0.584882 | 0.711 | 0.06  | 0 | Plasma cel MIR4435-2HG |
| 3648 | CDK1      | 0 | 0.58091  | 0.348 | 0.006 | 0 | Plasma cel CDK1        |
| 3649 | CDKN3     | 0 | 0.579756 | 0.413 | 0.011 | 0 | Plasma cel CDKN3       |
| 3650 | APOBEC3B  | 0 | 0.579264 | 0.48  | 0.004 | 0 | Plasma cel APOBEC3B    |
| 3651 | UBE2S     | 0 | 0.578443 | 0.454 | 0.026 | 0 | Plasma cel UBE2S       |
| 3652 | UCHL1     | 0 | 0.576398 | 0.316 | 0.001 | 0 | Plasma cel UCHL1       |
| 3653 | SLC44A1   | 0 | 0.573815 | 0.711 | 0.041 | 0 | Plasma cel SLC44A1     |
| 3654 | TP53INP1  | 0 | 0.573568 | 0.635 | 0.042 | 0 | Plasma cel TP53INP1    |
| 3655 | ZWINT     | 0 | 0.573561 | 0.404 | 0.013 | 0 | Plasma cel ZWINT       |
| 3656 | FEN1      | 0 | 0.570734 | 0.5   | 0.051 | 0 | Plasma cel FEN1        |
| 3657 | KPNA2     | 0 | 0.56882  | 0.567 | 0.075 | 0 | Plasma cel KPNA2       |
| 3658 | NUSAP1    | 0 | 0.563647 | 0.392 | 0.008 | 0 | Plasma cel NUSAP1      |
| 3659 | OAS1.1    | 0 | 0.562423 | 0.816 | 0.15  | 0 | Plasma cel OAS1        |
| 3660 | CENPM     | 0 | 0.560498 | 0.473 | 0.035 | 0 | Plasma cel CENPM       |
| 3661 | CCR10     | 0 | 0.556062 | 0.47  | 0.004 | 0 | Plasma cel CCR10       |
| 3662 | DNAJB9    | 0 | 0.555988 | 0.762 | 0.098 | 0 | Plasma cel DNAJB9      |
| 3663 | SIL1.1    | 0 | 0.55406  | 0.725 | 0.059 | 0 | Plasma cel SIL1        |
| 3664 | MKI67     | 0 | 0.553678 | 0.397 | 0.009 | 0 | Plasma cel MKI67       |
| 3665 | GNL3      | 0 | 0.552563 | 0.78  | 0.1   | 0 | Plasma cel GNL3        |
| 3666 | CPNE5     | 0 | 0.551748 | 0.725 | 0.048 | 0 | Plasma cel CPNE5       |
| 3667 | PYCR1     | 0 | 0.55153  | 0.599 | 0.012 | 0 | Plasma cel PYCR1       |
| 3668 | CCNC      | 0 | 0.548803 | 0.814 | 0.143 | 0 | Plasma cel CCNC        |
| 3669 | PSAT1     | 0 | 0.548461 | 0.512 | 0.035 | 0 | Plasma cel PSAT1       |
| 3670 | CENPW     | 0 | 0.547528 | 0.441 | 0.017 | 0 | Plasma cel CENPW       |
| 3671 | BAK1      | 0 | 0.542238 | 0.745 | 0.091 | 0 | Plasma cel BAK1        |
| 3672 | FCRL5     | 0 | 0.54139  | 0.661 | 0.036 | 0 | Plasma cel FCRL5       |

|                |   |          |       |       |                        |
|----------------|---|----------|-------|-------|------------------------|
| 3673 PHF19     | 0 | 0.539065 | 0.514 | 0.062 | 0 Plasma cel PHF19     |
| 3674 DHFR      | 0 | 0.537892 | 0.426 | 0.022 | 0 Plasma cel DHFR      |
| 3675 KLHL14    | 0 | 0.537496 | 0.378 | 0.031 | 0 Plasma cel KLHL14    |
| 3676 CCNA2     | 0 | 0.531415 | 0.344 | 0.004 | 0 Plasma cel CCNA2     |
| 3677 HIBCH.1   | 0 | 0.527839 | 0.791 | 0.103 | 0 Plasma cel HIBCH     |
| 3678 CHST12.2  | 0 | 0.526993 | 0.892 | 0.145 | 0 Plasma cel CHST12    |
| 3679 PDIA5     | 0 | 0.526681 | 0.656 | 0.014 | 0 Plasma cel PDIA5     |
| 3680 SEC24D    | 0 | 0.524287 | 0.66  | 0.031 | 0 Plasma cel SEC24D    |
| 3681 PERP      | 0 | 0.522116 | 0.482 | 0.011 | 0 Plasma cel PERP      |
| 3682 SLC17A9.1 | 0 | 0.518668 | 0.638 | 0.033 | 0 Plasma cel SLC17A9   |
| 3683 FNDC3B.1  | 0 | 0.517736 | 0.628 | 0.044 | 0 Plasma cel FNDC3B    |
| 3684 MAD2L1    | 0 | 0.51586  | 0.475 | 0.041 | 0 Plasma cel MAD2L1    |
| 3685 SLC1A5.1  | 0 | 0.515234 | 0.621 | 0.058 | 0 Plasma cel SLC1A5    |
| 3686 SHCBP1    | 0 | 0.514136 | 0.422 | 0.004 | 0 Plasma cel SHCBP1    |
| 3687 CCNB2     | 0 | 0.511109 | 0.348 | 0.005 | 0 Plasma cel CCNB2     |
| 3688 TPD52.1   | 0 | 0.508903 | 0.84  | 0.107 | 0 Plasma cel TPD52     |
| 3689 GMNN      | 0 | 0.506516 | 0.475 | 0.026 | 0 Plasma cel GMNN      |
| 3690 CENPU     | 0 | 0.505788 | 0.376 | 0.013 | 0 Plasma cel CENPU     |
| 3691 NCLN      | 0 | 0.504689 | 0.75  | 0.089 | 0 Plasma cel NCLN      |
| 3692 UBE2T     | 0 | 0.50323  | 0.468 | 0.035 | 0 Plasma cel UBE2T     |
| 3693 GSPT1     | 0 | 0.501188 | 0.69  | 0.11  | 0 Plasma cel GSPT1     |
| 3694 MEI1      | 0 | 0.49531  | 0.736 | 0.085 | 0 Plasma cel MEI1      |
| 3695 TUBG1     | 0 | 0.490188 | 0.52  | 0.036 | 0 Plasma cel TUBG1     |
| 3696 SAR1A     | 0 | 0.483274 | 0.762 | 0.103 | 0 Plasma cel SAR1A     |
| 3697 PDXK.1    | 0 | 0.480122 | 0.661 | 0.051 | 0 Plasma cel PDXK      |
| 3698 CHAC2     | 0 | 0.476941 | 0.608 | 0.025 | 0 Plasma cel CHAC2     |
| 3699 COPG1     | 0 | 0.473806 | 0.812 | 0.127 | 0 Plasma cel COPG1     |
| 3700 BUB1      | 0 | 0.472794 | 0.441 | 0.004 | 0 Plasma cel BUB1      |
| 3701 CHID1     | 0 | 0.472149 | 0.805 | 0.119 | 0 Plasma cel CHID1     |
| 3702 NPIPB12   | 0 | 0.467195 | 0.404 | 0.001 | 0 Plasma cel NPIPB12   |
| 3703 ZBTB38    | 0 | 0.464611 | 0.702 | 0.101 | 0 Plasma cel ZBTB38    |
| 3704 MGAT2     | 0 | 0.462377 | 0.755 | 0.091 | 0 Plasma cel MGAT2     |
| 3705 CLIC4     | 0 | 0.453679 | 0.679 | 0.045 | 0 Plasma cel CLIC4     |
| 3706 H2AFX     | 0 | 0.452416 | 0.449 | 0.047 | 0 Plasma cel H2AFX     |
| 3707 CDC6      | 0 | 0.451997 | 0.392 | 0.003 | 0 Plasma cel CDC6      |
| 3708 WIPI1     | 0 | 0.451521 | 0.619 | 0.03  | 0 Plasma cel WIPI1     |
| 3709 PLK1      | 0 | 0.450281 | 0.266 | 0.005 | 0 Plasma cel PLK1      |
| 3710 UCK2      | 0 | 0.448956 | 0.543 | 0.022 | 0 Plasma cel UCK2      |
| 3711 PARM1     | 0 | 0.448668 | 0.557 | 0.005 | 0 Plasma cel PARM1     |
| 3712 C11orf24  | 0 | 0.447803 | 0.757 | 0.099 | 0 Plasma cel C11orf24  |
| 3713 SCARB2.1  | 0 | 0.443677 | 0.663 | 0.056 | 0 Plasma cel SCARB2    |
| 3714 FUT8      | 0 | 0.442711 | 0.683 | 0.083 | 0 Plasma cel FUT8      |
| 3715 SLC1A4    | 0 | 0.437468 | 0.555 | 0.011 | 0 Plasma cel SLC1A4    |
| 3716 B9D1      | 0 | 0.432744 | 0.484 | 0.006 | 0 Plasma cel B9D1      |
| 3717 LINC02384 | 0 | 0.429385 | 0.567 | 0.032 | 0 Plasma cel LINC02384 |
| 3718 TMEM156.  | 0 | 0.421598 | 0.704 | 0.11  | 0 Plasma cel TMEM156   |
| 3719 PKMYT1    | 0 | 0.419336 | 0.307 | 0.003 | 0 Plasma cel PKMYT1    |

|      |           |   |          |       |       |   |                      |
|------|-----------|---|----------|-------|-------|---|----------------------|
| 3720 | USO1      | 0 | 0.417969 | 0.789 | 0.128 | 0 | Plasma cel USO1      |
| 3721 | RHOB.1    | 0 | 0.41751  | 0.514 | 0.066 | 0 | Plasma cel RHOB      |
| 3722 | SYVN1.1   | 0 | 0.413852 | 0.766 | 0.127 | 0 | Plasma cel SYVN1     |
| 3723 | SEL1L     | 0 | 0.413657 | 0.702 | 0.087 | 0 | Plasma cel SEL1L     |
| 3724 | CDV3.1    | 0 | 0.409886 | 0.73  | 0.11  | 0 | Plasma cel CDV3      |
| 3725 | CLPTM1L   | 0 | 0.40806  | 0.574 | 0.03  | 0 | Plasma cel CLPTM1L   |
| 3726 | DPAGT1    | 0 | 0.406598 | 0.683 | 0.076 | 0 | Plasma cel DPAGT1    |
| 3727 | ASNS      | 0 | 0.397314 | 0.551 | 0.048 | 0 | Plasma cel ASNS      |
| 3728 | HYI.1     | 0 | 0.391165 | 0.566 | 0.031 | 0 | Plasma cel HYI       |
| 3729 | PCLAF     | 0 | 0.389754 | 0.39  | 0.007 | 0 | Plasma cel PCLAF     |
| 3730 | ARMCX3    | 0 | 0.3891   | 0.683 | 0.1   | 0 | Plasma cel ARMCX3    |
| 3731 | PAPSS1.1  | 0 | 0.387792 | 0.759 | 0.123 | 0 | Plasma cel PAPSS1    |
| 3732 | CLSPN     | 0 | 0.387196 | 0.339 | 0.007 | 0 | Plasma cel CLSPN     |
| 3733 | ERGIC1.1  | 0 | 0.385344 | 0.734 | 0.105 | 0 | Plasma cel ERGIC1    |
| 3734 | ERN1      | 0 | 0.380513 | 0.539 | 0.05  | 0 | Plasma cel ERN1      |
| 3735 | NEU1      | 0 | 0.37605  | 0.645 | 0.07  | 0 | Plasma cel NEU1      |
| 3736 | SLC39A7   | 0 | 0.374491 | 0.697 | 0.08  | 0 | Plasma cel SLC39A7   |
| 3737 | DESI1     | 0 | 0.370906 | 0.684 | 0.109 | 0 | Plasma cel DESI1     |
| 3738 | TM9SF1    | 0 | 0.369269 | 0.651 | 0.065 | 0 | Plasma cel TM9SF1    |
| 3739 | LINC02362 | 0 | 0.369251 | 0.358 | 0     | 0 | Plasma cel LINC02362 |
| 3740 | CAV1      | 0 | 0.366493 | 0.369 | 0.001 | 0 | Plasma cel CAV1      |
| 3741 | GOLGB1    | 0 | 0.366444 | 0.668 | 0.106 | 0 | Plasma cel GOLGB1    |
| 3742 | NT5DC2    | 0 | 0.366314 | 0.45  | 0.003 | 0 | Plasma cel NT5DC2    |
| 3743 | KCNK6.1   | 0 | 0.36612  | 0.512 | 0.036 | 0 | Plasma cel KCNK6     |
| 3744 | CENPN     | 0 | 0.36569  | 0.394 | 0.017 | 0 | Plasma cel CENPN     |
| 3745 | SLC38A10. | 0 | 0.364903 | 0.761 | 0.122 | 0 | Plasma cel SLC38A10  |
| 3746 | TMEM214   | 0 | 0.360935 | 0.644 | 0.058 | 0 | Plasma cel TMEM214   |
| 3747 | SPTSSA    | 0 | 0.36082  | 0.621 | 0.062 | 0 | Plasma cel SPTSSA    |
| 3748 | METTL7A   | 0 | 0.357292 | 0.622 | 0.068 | 0 | Plasma cel METTL7A   |
| 3749 | ASF1B     | 0 | 0.353199 | 0.346 | 0.015 | 0 | Plasma cel ASF1B     |
| 3750 | GPRC5D    | 0 | 0.35163  | 0.309 | 0     | 0 | Plasma cel GPRC5D    |
| 3751 | ALG2      | 0 | 0.351323 | 0.732 | 0.099 | 0 | Plasma cel ALG2      |
| 3752 | EDEM1     | 0 | 0.35129  | 0.582 | 0.046 | 0 | Plasma cel EDEM1     |
| 3753 | IKBIP     | 0 | 0.347623 | 0.66  | 0.089 | 0 | Plasma cel IKBIP     |
| 3754 | JSRP1     | 0 | 0.346843 | 0.275 | 0.005 | 0 | Plasma cel JSRP1     |
| 3755 | HELLS     | 0 | 0.345538 | 0.378 | 0.021 | 0 | Plasma cel HELLS     |
| 3756 | GFPT1     | 0 | 0.342163 | 0.569 | 0.042 | 0 | Plasma cel GFPT1     |
| 3757 | AURKB     | 0 | 0.341941 | 0.309 | 0.004 | 0 | Plasma cel AURKB     |
| 3758 | ARID3A.1  | 0 | 0.339877 | 0.553 | 0.032 | 0 | Plasma cel ARID3A    |
| 3759 | ARL1      | 0 | 0.339458 | 0.743 | 0.119 | 0 | Plasma cel ARL1      |
| 3760 | MCEE      | 0 | 0.339342 | 0.676 | 0.062 | 0 | Plasma cel MCEE      |
| 3761 | TPX2      | 0 | 0.339312 | 0.307 | 0.006 | 0 | Plasma cel TPX2      |
| 3762 | PKHD1L1   | 0 | 0.338798 | 0.465 | 0.008 | 0 | Plasma cel PKHD1L1   |
| 3763 | ALG14     | 0 | 0.337579 | 0.539 | 0.027 | 0 | Plasma cel ALG14     |
| 3764 | SKA2      | 0 | 0.336755 | 0.606 | 0.089 | 0 | Plasma cel SKA2      |
| 3765 | DNM2.1    | 0 | 0.335549 | 0.677 | 0.102 | 0 | Plasma cel DNM2      |
| 3766 | CBWD2     | 0 | 0.333904 | 0.732 | 0.115 | 0 | Plasma cel CBWD2     |

|               |   |          |       |       |                        |
|---------------|---|----------|-------|-------|------------------------|
| 3767 C1GALT1C | 0 | 0.332714 | 0.67  | 0.083 | 0 Plasma cel C1GALT1C1 |
| 3768 SHMT1    | 0 | 0.329301 | 0.5   | 0.037 | 0 Plasma cel SHMT1     |
| 3769 MYL6B.1  | 0 | 0.32545  | 0.613 | 0.062 | 0 Plasma cel MYL6B     |
| 3770 COL9A3   | 0 | 0.324382 | 0.45  | 0.03  | 0 Plasma cel COL9A3    |
| 3771 HSD17B8  | 0 | 0.323408 | 0.647 | 0.084 | 0 Plasma cel HSD17B8   |
| 3772 CEP128   | 0 | 0.322766 | 0.459 | 0.01  | 0 Plasma cel CEP128    |
| 3773 IFNAR2   | 0 | 0.322745 | 0.644 | 0.076 | 0 Plasma cel IFNAR2    |
| 3774 COBLL1   | 0 | 0.321051 | 0.56  | 0.038 | 0 Plasma cel COBLL1    |
| 3775 CDCA3    | 0 | 0.318537 | 0.289 | 0.004 | 0 Plasma cel CDCA3     |
| 3776 ASPM     | 0 | 0.317672 | 0.321 | 0.004 | 0 Plasma cel ASPM      |
| 3777 AARS     | 0 | 0.317504 | 0.635 | 0.08  | 0 Plasma cel AARS      |
| 3778 TRIP13   | 0 | 0.31721  | 0.34  | 0.004 | 0 Plasma cel TRIP13    |
| 3779 HIST1H3B | 0 | 0.31635  | 0.252 | 0.003 | 0 Plasma cel HIST1H3B  |
| 3780 CENPF    | 0 | 0.315879 | 0.301 | 0.011 | 0 Plasma cel CENPF     |
| 3781 LZTFL1.1 | 0 | 0.315742 | 0.452 | 0.046 | 0 Plasma cel LZTFL1    |
| 3782 SSPN     | 0 | 0.314828 | 0.349 | 0.008 | 0 Plasma cel SSPN      |
| 3783 SEC24A   | 0 | 0.314225 | 0.495 | 0.027 | 0 Plasma cel SEC24A    |
| 3784 ACBD3    | 0 | 0.313355 | 0.571 | 0.046 | 0 Plasma cel ACBD3     |
| 3785 HMMR     | 0 | 0.312726 | 0.31  | 0.003 | 0 Plasma cel HMMR      |
| 3786 TRIB1.1  | 0 | 0.311782 | 0.441 | 0.015 | 0 Plasma cel TRIB1     |
| 3787 DEF8     | 0 | 0.311208 | 0.656 | 0.1   | 0 Plasma cel DEF8      |
| 3788 LMO4.1   | 0 | 0.311064 | 0.686 | 0.1   | 0 Plasma cel LMO4      |
| 3789 SMC2     | 0 | 0.310919 | 0.433 | 0.046 | 0 Plasma cel SMC2      |
| 3790 GMDS     | 0 | 0.310655 | 0.713 | 0.106 | 0 Plasma cel GMDS      |
| 3791 RHEX.1   | 0 | 0.309077 | 0.417 | 0.024 | 0 Plasma cel RHEX      |
| 3792 NCAPG    | 0 | 0.306865 | 0.309 | 0.004 | 0 Plasma cel NCAPG     |
| 3793 MCM2     | 0 | 0.306628 | 0.339 | 0.025 | 0 Plasma cel MCM2      |
| 3794 LGALS3.1 | 0 | 0.301926 | 0.782 | 0.111 | 0 Plasma cel LGALS3    |
| 3795 DLGAP5   | 0 | 0.299993 | 0.28  | 0.003 | 0 Plasma cel DLGAP5    |
| 3796 BMP8B    | 0 | 0.298904 | 0.369 | 0.001 | 0 Plasma cel BMP8B     |
| 3797 PLA2G16  | 0 | 0.298373 | 0.502 | 0.061 | 0 Plasma cel PLA2G16   |
| 3798 TOP2A    | 0 | 0.297793 | 0.268 | 0.006 | 0 Plasma cel TOP2A     |
| 3799 TCF4.1   | 0 | 0.297286 | 0.764 | 0.117 | 0 Plasma cel TCF4      |
| 3800 MAGED1.1 | 0 | 0.296166 | 0.608 | 0.083 | 0 Plasma cel MAGED1    |
| 3801 CLECL1   | 0 | 0.295193 | 0.472 | 0.04  | 0 Plasma cel CLECL1    |
| 3802 MAGT1    | 0 | 0.294522 | 0.598 | 0.059 | 0 Plasma cel MAGT1     |
| 3803 ACAT1    | 0 | 0.29345  | 0.615 | 0.074 | 0 Plasma cel ACAT1     |
| 3804 ZBTB32   | 0 | 0.292356 | 0.388 | 0.011 | 0 Plasma cel ZBTB32    |
| 3805 SCFD1    | 0 | 0.291583 | 0.681 | 0.106 | 0 Plasma cel SCFD1     |
| 3806 EZH2     | 0 | 0.29114  | 0.417 | 0.029 | 0 Plasma cel EZH2      |
| 3807 TRAM2    | 0 | 0.289732 | 0.452 | 0.016 | 0 Plasma cel TRAM2     |
| 3808 CREB3    | 0 | 0.288378 | 0.661 | 0.087 | 0 Plasma cel CREB3     |
| 3809 LRR1     | 0 | 0.288217 | 0.461 | 0.046 | 0 Plasma cel LRR1      |
| 3810 CDC45    | 0 | 0.286983 | 0.3   | 0.004 | 0 Plasma cel CDC45     |
| 3811 CBWD1    | 0 | 0.286653 | 0.511 | 0.055 | 0 Plasma cel CBWD1     |
| 3812 RBBP8    | 0 | 0.284667 | 0.44  | 0.034 | 0 Plasma cel RBBP8     |
| 3813 SPC25    | 0 | 0.284492 | 0.287 | 0.002 | 0 Plasma cel SPC25     |

|                |           |          |       |       |                              |
|----------------|-----------|----------|-------|-------|------------------------------|
| 3814 ANKRD28.  | 0         | 0.28384  | 0.457 | 0.023 | 0 Plasma cel ANKRD28         |
| 3815 PGM3      | 0         | 0.281341 | 0.479 | 0.027 | 0 Plasma cel PGM3            |
| 3816 FBXW7     | 0         | 0.280045 | 0.461 | 0.036 | 0 Plasma cel FBXW7           |
| 3817 RGS13     | 0         | 0.279888 | 0.165 | 0.001 | 0 Plasma cel RGS13           |
| 3818 CDT1      | 0         | 0.276872 | 0.293 | 0.006 | 0 Plasma cel CDT1            |
| 3819 HIST1H3G  | 0         | 0.27494  | 0.191 | 0.002 | 0 Plasma cel HIST1H3G        |
| 3820 CD59      | 0         | 0.273727 | 0.426 | 0.017 | 0 Plasma cel CD59            |
| 3821 GCSH      | 0         | 0.272986 | 0.486 | 0.03  | 0 Plasma cel GCSH            |
| 3822 AC104699. | 0         | 0.27202  | 0.363 | 0.001 | 0 Plasma cel AC104699.1      |
| 3823 KIFC1     | 0         | 0.271769 | 0.284 | 0.004 | 0 Plasma cel KIFC1           |
| 3824 MPST.2    | 0         | 0.271511 | 0.626 | 0.076 | 0 Plasma cel MPST            |
| 3825 CNPY2     | 0         | 0.269693 | 0.713 | 0.113 | 0 Plasma cel CNPY2           |
| 3826 UHRF1     | 0         | 0.266006 | 0.27  | 0.004 | 0 Plasma cel UHRF1           |
| 3827 CLN6      | 0         | 0.2648   | 0.511 | 0.042 | 0 Plasma cel CLN6            |
| 3828 NXPE3     | 0         | 0.26457  | 0.592 | 0.069 | 0 Plasma cel NXPE3           |
| 3829 ORC6      | 0         | 0.264299 | 0.305 | 0.008 | 0 Plasma cel ORC6            |
| 3830 CDKN2A    | 0         | 0.261768 | 0.348 | 0.012 | 0 Plasma cel CDKN2A          |
| 3831 ALG8      | 0         | 0.260912 | 0.598 | 0.071 | 0 Plasma cel ALG8            |
| 3832 CADM1     | 0         | 0.260116 | 0.305 | 0.002 | 0 Plasma cel CADM1           |
| 3833 MCM4      | 0         | 0.256798 | 0.307 | 0.017 | 0 Plasma cel MCM4            |
| 3834 MIXL1     | 0         | 0.25669  | 0.321 | 0     | 0 Plasma cel MIXL1           |
| 3835 HMBS      | 0         | 0.256602 | 0.52  | 0.047 | 0 Plasma cel HMBS            |
| 3836 KLF10.2   | 0         | 0.256373 | 0.468 | 0.054 | 0 Plasma cel KLF10           |
| 3837 FAM69A    | 0         | 0.255527 | 0.628 | 0.076 | 0 Plasma cel FAM69A          |
| 3838 HIST1H2BH | 0         | 0.254007 | 0.319 | 0.008 | 0 Plasma cel HIST1H2BH       |
| 3839 CNKSR1    | 0         | 0.253764 | 0.326 | 0.002 | 0 Plasma cel CNKSR1          |
| 3840 CNP       | 0         | 0.253005 | 0.523 | 0.062 | 0 Plasma cel CNP             |
| 3841 RASGRP3   | 0         | 0.252647 | 0.392 | 0.02  | 0 Plasma cel RASGRP3         |
| 3842 GTSE1     | 0         | 0.25251  | 0.246 | 0.003 | 0 Plasma cel GTSE1           |
| 3843 NUGGC     | 0         | 0.251737 | 0.358 | 0.002 | 0 Plasma cel NUGGC           |
| 3844 NDC80     | 0         | 0.251708 | 0.285 | 0.017 | 0 Plasma cel NDC80           |
| 3845 ACSS1     | 0         | 0.250922 | 0.539 | 0.063 | 0 Plasma cel ACSS1           |
| 3846 NUS1      | 0         | 0.250769 | 0.574 | 0.067 | 0 Plasma cel NUS1            |
| 3847 TROAP     | 0         | 0.25064  | 0.31  | 0.004 | 0 Plasma cel TROAP           |
| 3848 DTL       | 0         | 0.250169 | 0.271 | 0.003 | 0 Plasma cel DTL             |
| 3849 RPL30.1   | 0         | -2.00241 | 0.989 | 0.997 | 0 Plasma cel RPL30           |
| 3850 P4HB      | 2.11E-307 | 1.605131 | 0.972 | 0.378 | 3.96E-303 Plasma cel P4HB    |
| 3851 IER3IP1   | 2.42E-306 | 0.332216 | 0.727 | 0.121 | 4.54E-302 Plasma cel IER3IP1 |
| 3852 SEC63     | 4.94E-306 | 0.429612 | 0.784 | 0.137 | 9.27E-302 Plasma cel SEC63   |
| 3853 PMVK      | 2.94E-305 | 0.420849 | 0.725 | 0.122 | 5.53E-301 Plasma cel PMVK    |
| 3854 PCK2      | 2.34E-304 | 0.306034 | 0.55  | 0.077 | 4.40E-300 Plasma cel PCK2    |
| 3855 OSTC.1    | 5.93E-304 | 1.526051 | 0.989 | 0.427 | 1.11E-299 Plasma cel OSTC    |
| 3856 BCL2L12   | 5.05E-302 | 0.271763 | 0.496 | 0.065 | 9.50E-298 Plasma cel BCL2L12 |
| 3857 RNASEH1   | 8.25E-302 | 0.299909 | 0.645 | 0.101 | 1.55E-297 Plasma cel RNASEH1 |
| 3858 CCDC32.1  | 7.41E-301 | 0.48052  | 0.821 | 0.151 | 1.39E-296 Plasma cel CCDC32  |
| 3859 NTAN1     | 1.00E-300 | 0.300126 | 0.635 | 0.098 | 1.89E-296 Plasma cel NTAN1   |
| 3860 CXXC5.2   | 2.13E-298 | 0.298805 | 0.766 | 0.133 | 4.00E-294 Plasma cel CXXC5   |

|      |           |           |          |       |       |           |                         |
|------|-----------|-----------|----------|-------|-------|-----------|-------------------------|
| 3861 | GPR25     | 3.33E-298 | 0.304815 | 0.243 | 0.018 | 6.26E-294 | Plasma cel GPR25        |
| 3862 | PAICS.2   | 9.40E-298 | 0.510425 | 0.661 | 0.11  | 1.77E-293 | Plasma cel PAICS        |
| 3863 | FAU.1     | 3.76E-297 | -1.25391 | 0.991 | 0.998 | 7.07E-293 | Plasma cel FAU          |
| 3864 | FH        | 4.48E-297 | 0.31144  | 0.647 | 0.102 | 8.41E-293 | Plasma cel FH           |
| 3865 | SRP54     | 5.92E-297 | 0.559896 | 0.879 | 0.172 | 1.11E-292 | Plasma cel SRP54        |
| 3866 | ALG3      | 1.56E-296 | 0.357725 | 0.72  | 0.122 | 2.93E-292 | Plasma cel ALG3         |
| 3867 | TMEM106   | 8.79E-295 | 0.46664  | 0.61  | 0.096 | 1.65E-290 | Plasma cel TMEM106C     |
| 3868 | SSR1      | 4.12E-291 | 1.099439 | 0.941 | 0.252 | 7.73E-287 | Plasma cel SSR1         |
| 3869 | PFDN5     | 4.26E-291 | -1.73149 | 0.973 | 0.979 | 8.01E-287 | Plasma cel PFDN5        |
| 3870 | ARF4      | 5.12E-291 | 1.191992 | 0.945 | 0.269 | 9.61E-287 | Plasma cel ARF4         |
| 3871 | FTSJ1.1   | 2.41E-290 | 0.479071 | 0.793 | 0.146 | 4.53E-286 | Plasma cel FTSJ1        |
| 3872 | SEC23B    | 8.43E-290 | 0.363623 | 0.743 | 0.13  | 1.58E-285 | Plasma cel SEC23B       |
| 3873 | RPL32.1   | 1.09E-289 | -1.76054 | 0.993 | 0.995 | 2.05E-285 | Plasma cel RPL32        |
| 3874 | DERL2     | 2.06E-289 | 0.686661 | 0.883 | 0.182 | 3.87E-285 | Plasma cel DERL2        |
| 3875 | STT3B     | 9.44E-289 | 0.3013   | 0.697 | 0.117 | 1.77E-284 | Plasma cel STT3B        |
| 3876 | TMSB4X.2  | 3.82E-288 | -1.84146 | 0.979 | 0.999 | 7.18E-284 | Plasma cel TMSB4X       |
| 3877 | MORF4L2   | 5.73E-284 | 0.303782 | 0.709 | 0.122 | 1.08E-279 | Plasma cel MORF4L2      |
| 3878 | SEC61G.2  | 1.20E-283 | 1.775775 | 0.982 | 0.508 | 2.26E-279 | Plasma cel SEC61G       |
| 3879 | BOLA2-SM  | 1.85E-282 | 0.250762 | 0.633 | 0.102 | 3.47E-278 | Plasma cel BOLA2-SMG1P6 |
| 3880 | MARS      | 2.41E-282 | 0.309606 | 0.727 | 0.127 | 4.53E-278 | Plasma cel MARS         |
| 3881 | HSH2D     | 8.25E-282 | 0.392246 | 0.848 | 0.163 | 1.55E-277 | Plasma cel HSH2D        |
| 3882 | GLRX5     | 9.76E-281 | 0.262484 | 0.532 | 0.077 | 1.83E-276 | Plasma cel GLRX5        |
| 3883 | RPL11.1   | 8.75E-278 | -1.48727 | 0.989 | 0.995 | 1.64E-273 | Plasma cel RPL11        |
| 3884 | RPS12.2   | 1.10E-277 | -1.74266 | 0.991 | 0.995 | 2.07E-273 | Plasma cel RPS12        |
| 3885 | RPS27A.1  | 3.00E-276 | -1.4755  | 0.991 | 0.995 | 5.64E-272 | Plasma cel RPS27A       |
| 3886 | RPN1      | 8.91E-276 | 1.326012 | 0.959 | 0.354 | 1.67E-271 | Plasma cel RPN1         |
| 3887 | ARFGAP3   | 9.38E-276 | 0.418889 | 0.771 | 0.144 | 1.76E-271 | Plasma cel ARFGAP3      |
| 3888 | PLPP5.1   | 2.33E-275 | 0.541593 | 0.941 | 0.203 | 4.37E-271 | Plasma cel PLPP5        |
| 3889 | USP48     | 2.22E-274 | 0.314748 | 0.748 | 0.135 | 4.16E-270 | Plasma cel USP48        |
| 3890 | CHMP4B.1  | 2.41E-274 | 0.355406 | 0.72  | 0.129 | 4.52E-270 | Plasma cel CHMP4B       |
| 3891 | RPS23.2   | 4.52E-274 | -1.55648 | 0.991 | 0.993 | 8.50E-270 | Plasma cel RPS23        |
| 3892 | RPL13.1   | 4.38E-272 | -1.55976 | 0.996 | 0.992 | 8.22E-268 | Plasma cel RPL13        |
| 3893 | LINC01480 | 8.54E-272 | 0.462917 | 0.326 | 0.034 | 1.60E-267 | Plasma cel LINC01480    |
| 3894 | RPL19.1   | 2.87E-271 | -1.32734 | 0.996 | 0.995 | 5.39E-267 | Plasma cel RPL19        |
| 3895 | TMED9.1   | 2.89E-271 | 1.264718 | 0.963 | 0.321 | 5.43E-267 | Plasma cel TMED9        |
| 3896 | SLC52A2   | 3.09E-271 | 0.270808 | 0.679 | 0.117 | 5.81E-267 | Plasma cel SLC52A2      |
| 3897 | EEF1A1.1  | 4.55E-271 | -1.60655 | 0.996 | 0.997 | 8.55E-267 | Plasma cel EEF1A1       |
| 3898 | TMED10    | 5.07E-271 | 1.224795 | 0.966 | 0.321 | 9.52E-267 | Plasma cel TMED10       |
| 3899 | IGHV3-64  | 2.67E-270 | 2.79788  | 0.119 | 0.004 | 5.01E-266 | Plasma cel IGHV3-64     |
| 3900 | RPN2.1    | 1.13E-269 | 1.431956 | 0.97  | 0.414 | 2.12E-265 | Plasma cel RPN2         |
| 3901 | MCM6      | 1.02E-264 | 0.322162 | 0.379 | 0.046 | 1.91E-260 | Plasma cel MCM6         |
| 3902 | RPL10.1   | 1.42E-262 | -1.41783 | 0.996 | 0.995 | 2.68E-258 | Plasma cel RPL10        |
| 3903 | KLF13     | 2.28E-261 | 0.429749 | 0.775 | 0.151 | 4.28E-257 | Plasma cel KLF13        |
| 3904 | ATF4      | 1.68E-260 | 0.287865 | 0.739 | 0.137 | 3.16E-256 | Plasma cel ATF4         |
| 3905 | TMEM258   | 9.24E-257 | 1.478063 | 0.988 | 0.631 | 1.73E-252 | Plasma cel TMEM258      |
| 3906 | EBNA1BP2  | 2.56E-255 | 0.42117  | 0.667 | 0.122 | 4.82E-251 | Plasma cel EBNA1BP2     |
| 3907 | LMAN2     | 4.61E-255 | 1.239961 | 0.979 | 0.397 | 8.65E-251 | Plasma cel LMAN2        |

|      |          |           |          |       |       |           |                     |
|------|----------|-----------|----------|-------|-------|-----------|---------------------|
| 3908 | FAM136A  | 1.48E-254 | 0.452522 | 0.787 | 0.157 | 2.78E-250 | Plasma cel FAM136A  |
| 3909 | RPL28.1  | 2.20E-254 | -1.06892 | 0.995 | 0.998 | 4.14E-250 | Plasma cel RPL28    |
| 3910 | TMED5    | 5.08E-254 | 0.475359 | 0.821 | 0.168 | 9.55E-250 | Plasma cel TMED5    |
| 3911 | RPL34.2  | 5.12E-253 | -1.69606 | 0.993 | 0.995 | 9.61E-249 | Plasma cel RPL34    |
| 3912 | RPS3A.2  | 3.49E-252 | -1.52916 | 0.991 | 0.991 | 6.56E-248 | Plasma cel RPS3A    |
| 3913 | COPB2    | 3.62E-252 | 0.598236 | 0.851 | 0.185 | 6.81E-248 | Plasma cel COPB2    |
| 3914 | IGLC2.1  | 4.96E-252 | 4.038506 | 0.514 | 0.097 | 9.32E-248 | Plasma cel IGLC2    |
| 3915 | EEF1D.2  | 2.87E-251 | -1.39188 | 0.982 | 0.984 | 5.39E-247 | Plasma cel EEF1D    |
| 3916 | UBE2G1   | 4.42E-251 | 0.646088 | 0.855 | 0.187 | 8.30E-247 | Plasma cel UBE2G1   |
| 3917 | RPL29.2  | 6.59E-251 | -1.29907 | 0.991 | 0.993 | 1.24E-246 | Plasma cel RPL29    |
| 3918 | YIF1A    | 9.14E-251 | 0.595374 | 0.851 | 0.186 | 1.72E-246 | Plasma cel YIF1A    |
| 3919 | TMEM167  | 8.45E-250 | 0.492803 | 0.879 | 0.189 | 1.59E-245 | Plasma cel TMEM167A |
| 3920 | RPL26L1  | 5.10E-249 | 0.289378 | 0.668 | 0.121 | 9.58E-245 | Plasma cel RPL26L1  |
| 3921 | IGKV1-9  | 7.68E-249 | 4.347092 | 0.117 | 0.005 | 1.44E-244 | Plasma cel IGKV1-9  |
| 3922 | IQGAP2.2 | 3.54E-248 | 0.255061 | 0.66  | 0.119 | 6.66E-244 | Plasma cel IQGAP2   |
| 3923 | PSMD12   | 3.65E-248 | 0.290381 | 0.73  | 0.139 | 6.85E-244 | Plasma cel PSMD12   |
| 3924 | CTSH.2   | 1.30E-247 | 0.410381 | 0.75  | 0.148 | 2.44E-243 | Plasma cel CTSH     |
| 3925 | DDOST.2  | 2.15E-247 | 1.325432 | 0.961 | 0.433 | 4.03E-243 | Plasma cel DDOST    |
| 3926 | SPCS1.1  | 1.34E-245 | 1.299346 | 0.995 | 0.641 | 2.51E-241 | Plasma cel SPCS1    |
| 3927 | TOP1.1   | 3.01E-245 | 0.663658 | 0.892 | 0.207 | 5.65E-241 | Plasma cel TOP1     |
| 3928 | PSMD14   | 3.83E-245 | 0.311479 | 0.699 | 0.131 | 7.19E-241 | Plasma cel PSMD14   |
| 3929 | RPS15.2  | 5.69E-245 | -1.06098 | 0.998 | 0.994 | 1.07E-240 | Plasma cel RPS15    |
| 3930 | RPL12.2  | 8.28E-244 | -1.28182 | 0.991 | 0.992 | 1.55E-239 | Plasma cel RPL12    |
| 3931 | MRPS14   | 3.02E-243 | 0.298795 | 0.752 | 0.146 | 5.67E-239 | Plasma cel MRPS14   |
| 3932 | SEC13    | 5.37E-243 | 1.05995  | 0.924 | 0.28  | 1.01E-238 | Plasma cel SEC13    |
| 3933 | RPS27.2  | 7.81E-243 | -1.97307 | 0.993 | 0.994 | 1.47E-238 | Plasma cel RPS27    |
| 3934 | RPS25.1  | 6.28E-241 | -1.36147 | 0.986 | 0.991 | 1.18E-236 | Plasma cel RPS25    |
| 3935 | SND1     | 2.19E-240 | 0.566406 | 0.86  | 0.191 | 4.12E-236 | Plasma cel SND1     |
| 3936 | RPS19.1  | 4.99E-240 | -1.10692 | 0.996 | 0.993 | 9.38E-236 | Plasma cel RPS19    |
| 3937 | HNRNPAB  | 1.08E-237 | 0.431899 | 0.583 | 0.104 | 2.03E-233 | Plasma cel HNRNPAB  |
| 3938 | RPL39.2  | 1.20E-237 | -1.58379 | 1     | 0.997 | 2.26E-233 | Plasma cel RPL39    |
| 3939 | RPS3.2   | 3.67E-237 | -1.25533 | 0.989 | 0.993 | 6.90E-233 | Plasma cel RPS3     |
| 3940 | CALR.1   | 5.38E-237 | 1.776163 | 0.991 | 0.599 | 1.01E-232 | Plasma cel CALR     |
| 3941 | RPL41.1  | 6.61E-237 | -0.98748 | 1     | 0.999 | 1.24E-232 | Plasma cel RPL41    |
| 3942 | MPDU1    | 1.44E-236 | 0.272771 | 0.645 | 0.119 | 2.70E-232 | Plasma cel MPDU1    |
| 3943 | EIF4G1   | 1.80E-236 | 0.377842 | 0.752 | 0.152 | 3.38E-232 | Plasma cel EIF4G1   |
| 3944 | TXNL4A   | 1.83E-234 | 0.39015  | 0.748 | 0.152 | 3.43E-230 | Plasma cel TXNL4A   |
| 3945 | ODC1.1   | 4.81E-234 | 0.574923 | 0.736 | 0.156 | 9.03E-230 | Plasma cel ODC1     |
| 3946 | RPL6.1   | 1.68E-233 | -1.15876 | 0.993 | 0.991 | 3.16E-229 | Plasma cel RPL6     |
| 3947 | COMMD6   | 3.60E-233 | -1.84233 | 0.915 | 0.915 | 6.75E-229 | Plasma cel COMMD6   |
| 3948 | RPL18A.1 | 7.03E-233 | -1.28897 | 0.993 | 0.992 | 1.32E-228 | Plasma cel RPL18A   |
| 3949 | MEF2C.1  | 1.12E-232 | 0.378152 | 0.901 | 0.203 | 2.10E-228 | Plasma cel MEF2C    |
| 3950 | RPS13.1  | 1.09E-231 | -1.19703 | 0.988 | 0.993 | 2.04E-227 | Plasma cel RPS13    |
| 3951 | MRPL22   | 2.86E-231 | 0.470305 | 0.819 | 0.178 | 5.37E-227 | Plasma cel MRPL22   |
| 3952 | RPL26.2  | 3.69E-231 | -1.35471 | 0.982 | 0.989 | 6.93E-227 | Plasma cel RPL26    |
| 3953 | CCDC47   | 1.94E-230 | 0.266547 | 0.621 | 0.113 | 3.64E-226 | Plasma cel CCDC47   |
| 3954 | FDX1.1   | 3.14E-230 | 0.591905 | 0.879 | 0.204 | 5.90E-226 | Plasma cel FDX1     |



|      |            |           |          |       |       |           |                       |
|------|------------|-----------|----------|-------|-------|-----------|-----------------------|
| 3955 | C12orf75.1 | 6.39E-230 | 0.686942 | 0.824 | 0.194 | 1.20E-225 | Plasma cel C12orf75   |
| 3956 | PSMC2      | 4.58E-229 | 0.331689 | 0.723 | 0.145 | 8.60E-225 | Plasma cel PSMC2      |
| 3957 | CCND2.1    | 1.86E-228 | 1.247075 | 0.637 | 0.136 | 3.49E-224 | Plasma cel CCND2      |
| 3958 | SURF4      | 1.14E-227 | 0.427915 | 0.8   | 0.171 | 2.14E-223 | Plasma cel SURF4      |
| 3959 | ARSA       | 1.34E-226 | 0.322215 | 0.718 | 0.145 | 2.51E-222 | Plasma cel ARSA       |
| 3960 | DPM2       | 2.09E-226 | 0.345445 | 0.777 | 0.162 | 3.92E-222 | Plasma cel DPM2       |
| 3961 | LTB.2      | 7.06E-226 | -3.70066 | 0.142 | 0.817 | 1.33E-221 | Plasma cel LTB        |
| 3962 | LAP3.1     | 9.42E-226 | 0.492007 | 0.793 | 0.174 | 1.77E-221 | Plasma cel LAP3       |
| 3963 | YIF1B.2    | 1.67E-225 | 0.543459 | 0.819 | 0.184 | 3.14E-221 | Plasma cel YIF1B      |
| 3964 | SSSCA1     | 3.67E-225 | 0.349501 | 0.789 | 0.167 | 6.90E-221 | Plasma cel SSSCA1     |
| 3965 | RPL14.2    | 4.62E-225 | -1.23126 | 0.989 | 0.989 | 8.67E-221 | Plasma cel RPL14      |
| 3966 | MYL12A.2   | 3.22E-224 | -1.7304  | 0.949 | 0.946 | 6.06E-220 | Plasma cel MYL12A     |
| 3967 | RPS9.1     | 1.47E-223 | -1.12745 | 0.989 | 0.992 | 2.76E-219 | Plasma cel RPS9       |
| 3968 | CANX.2     | 5.14E-223 | 1.001117 | 0.943 | 0.29  | 9.66E-219 | Plasma cel CANX       |
| 3969 | LGALS1.1   | 1.24E-221 | 0.409217 | 0.883 | 0.222 | 2.33E-217 | Plasma cel LGALS1     |
| 3970 | HIST1H1C   | 1.58E-220 | 0.384234 | 0.75  | 0.16  | 2.97E-216 | Plasma cel HIST1H1C   |
| 3971 | PDLIM1.1   | 4.57E-220 | 0.378297 | 0.805 | 0.176 | 8.58E-216 | Plasma cel PDLIM1     |
| 3972 | RPS24.2    | 2.18E-218 | -1.02426 | 0.995 | 0.994 | 4.09E-214 | Plasma cel RPS24      |
| 3973 | HLA-E.2    | 2.59E-218 | -1.52488 | 0.977 | 0.956 | 4.86E-214 | Plasma cel HLA-E      |
| 3974 | NACA.2     | 1.21E-216 | -1.0821  | 0.988 | 0.991 | 2.28E-212 | Plasma cel NACA       |
| 3975 | ERGIC2.1   | 1.72E-214 | 0.367978 | 0.84  | 0.187 | 3.23E-210 | Plasma cel ERGIC2     |
| 3976 | COMMD1     | 1.80E-214 | 0.267392 | 0.761 | 0.16  | 3.37E-210 | Plasma cel COMMD1     |
| 3977 | RPL9.1     | 3.26E-214 | -1.29948 | 0.986 | 0.984 | 6.13E-210 | Plasma cel RPL9       |
| 3978 | EPRS       | 5.81E-214 | 0.492788 | 0.851 | 0.198 | 1.09E-209 | Plasma cel EPRS       |
| 3979 | AC233755.1 | 4.81E-213 | 4.251532 | 0.135 | 0.008 | 9.03E-209 | Plasma cel AC233755.1 |
| 3980 | PABPC4     | 6.55E-213 | 0.269366 | 0.762 | 0.162 | 1.23E-208 | Plasma cel PABPC4     |
| 3981 | IFITM2.2   | 8.88E-213 | -3.17035 | 0.316 | 0.832 | 1.67E-208 | Plasma cel IFITM2     |
| 3982 | IDH2       | 1.45E-212 | 0.8457   | 0.913 | 0.262 | 2.72E-208 | Plasma cel IDH2       |
| 3983 | CKS1B      | 2.34E-212 | 0.440695 | 0.495 | 0.086 | 4.40E-208 | Plasma cel CKS1B      |
| 3984 | NUDT5      | 1.17E-211 | 0.423317 | 0.801 | 0.18  | 2.20E-207 | Plasma cel NUDT5      |
| 3985 | RPS14.1    | 3.57E-211 | -1.18791 | 0.991 | 0.991 | 6.71E-207 | Plasma cel RPS14      |
| 3986 | RPS15A.1   | 1.15E-210 | -1.15635 | 0.995 | 0.997 | 2.16E-206 | Plasma cel RPS15A     |
| 3987 | MALAT1.2   | 1.78E-210 | -1.85978 | 0.998 | 0.996 | 3.34E-206 | Plasma cel MALAT1     |
| 3988 | BTG1.2     | 3.20E-210 | -2.47567 | 0.745 | 0.883 | 6.00E-206 | Plasma cel BTG1       |
| 3989 | CLINT1     | 6.57E-210 | 0.396308 | 0.814 | 0.184 | 1.23E-205 | Plasma cel CLINT1     |
| 3990 | RPL18.1    | 7.24E-210 | -1.05604 | 0.991 | 0.991 | 1.36E-205 | Plasma cel RPL18      |
| 3991 | SELENOK    | 1.33E-207 | 0.958666 | 0.949 | 0.297 | 2.50E-203 | Plasma cel SELENOK    |
| 3992 | ISG20.2    | 1.65E-207 | 1.305322 | 0.986 | 0.557 | 3.10E-203 | Plasma cel ISG20      |
| 3993 | NCOA3.1    | 3.45E-206 | 0.250096 | 0.722 | 0.153 | 6.48E-202 | Plasma cel NCOA3      |
| 3994 | POP7       | 1.36E-205 | 0.273121 | 0.601 | 0.117 | 2.55E-201 | Plasma cel POP7       |
| 3995 | CSRP1      | 5.10E-205 | 0.291671 | 0.629 | 0.126 | 9.59E-201 | Plasma cel CSRP1      |
| 3996 | PDHA1      | 7.53E-205 | 0.278708 | 0.699 | 0.146 | 1.41E-200 | Plasma cel PDHA1      |
| 3997 | SNRNP25    | 1.19E-203 | 0.315551 | 0.626 | 0.126 | 2.24E-199 | Plasma cel SNRNP25    |
| 3998 | RPS28.2    | 2.75E-203 | -1.17771 | 0.995 | 0.995 | 5.17E-199 | Plasma cel RPS28      |
| 3999 | RPL35A.2   | 9.89E-202 | -1.23683 | 0.984 | 0.989 | 1.86E-197 | Plasma cel RPL35A     |
| 4000 | RPS7.2     | 1.10E-201 | -0.91689 | 0.989 | 0.993 | 2.07E-197 | Plasma cel RPS7       |
| 4001 | AHCY.1     | 2.87E-201 | 0.489284 | 0.757 | 0.176 | 5.39E-197 | Plasma cel AHCY       |

|      |          |           |          |       |       |           |                    |
|------|----------|-----------|----------|-------|-------|-----------|--------------------|
| 4002 | DTYMK    | 9.34E-201 | 0.312156 | 0.52  | 0.095 | 1.76E-196 | Plasma cel DTYMK   |
| 4003 | TXN.2    | 1.63E-200 | 1.249082 | 0.94  | 0.353 | 3.06E-196 | Plasma cel TXN     |
| 4004 | RACK1.2  | 7.36E-200 | -1.13223 | 0.986 | 0.986 | 1.38E-195 | Plasma cel RACK1   |
| 4005 | UFM1     | 1.48E-198 | 0.677352 | 0.895 | 0.237 | 2.78E-194 | Plasma cel UFM1    |
| 4006 | MRPS33   | 1.64E-198 | 0.286733 | 0.77  | 0.171 | 3.09E-194 | Plasma cel MRPS33  |
| 4007 | MRPS16   | 3.66E-198 | 0.381178 | 0.812 | 0.189 | 6.88E-194 | Plasma cel MRPS16  |
| 4008 | PIM2.1   | 7.09E-197 | 1.064615 | 0.924 | 0.299 | 1.33E-192 | Plasma cel PIM2    |
| 4009 | MTDH.1   | 2.10E-196 | 1.244188 | 0.957 | 0.43  | 3.95E-192 | Plasma cel MTDH    |
| 4010 | MRPL40   | 2.74E-196 | 0.449677 | 0.828 | 0.198 | 5.15E-192 | Plasma cel MRPL40  |
| 4011 | CD37.1   | 1.63E-195 | -2.59403 | 0.872 | 0.892 | 3.06E-191 | Plasma cel CD37    |
| 4012 | SRP72    | 2.01E-195 | 0.546988 | 0.902 | 0.232 | 3.78E-191 | Plasma cel SRP72   |
| 4013 | MRPL55   | 1.79E-194 | 0.274492 | 0.784 | 0.178 | 3.36E-190 | Plasma cel MRPL55  |
| 4014 | TRAM1.1  | 1.90E-194 | 1.018756 | 0.963 | 0.39  | 3.56E-190 | Plasma cel TRAM1   |
| 4015 | GARS     | 2.74E-194 | 0.371931 | 0.732 | 0.165 | 5.15E-190 | Plasma cel GARS    |
| 4016 | MESD     | 3.55E-194 | 0.567932 | 0.895 | 0.232 | 6.67E-190 | Plasma cel MESD    |
| 4017 | MCTS1    | 3.73E-193 | 0.348262 | 0.817 | 0.191 | 7.01E-189 | Plasma cel MCTS1   |
| 4018 | ANXA2.1  | 1.72E-192 | 0.858889 | 0.945 | 0.296 | 3.23E-188 | Plasma cel ANXA2   |
| 4019 | ATP1B3.1 | 2.72E-192 | 0.346671 | 0.684 | 0.15  | 5.11E-188 | Plasma cel ATP1B3  |
| 4020 | RFC4     | 1.78E-191 | 0.283666 | 0.427 | 0.071 | 3.34E-187 | Plasma cel RFC4    |
| 4021 | ACO2     | 5.32E-191 | 0.373419 | 0.807 | 0.19  | 1.00E-186 | Plasma cel ACO2    |
| 4022 | MRPS24.1 | 1.62E-189 | 0.319923 | 0.826 | 0.195 | 3.04E-185 | Plasma cel MRPS24  |
| 4023 | KDEL1.1  | 5.37E-189 | 0.890802 | 0.936 | 0.316 | 1.01E-184 | Plasma cel KDEL1   |
| 4024 | TMED2    | 2.70E-186 | 0.909779 | 0.927 | 0.319 | 5.07E-182 | Plasma cel TMED2   |
| 4025 | HERPUD1. | 2.70E-186 | 1.099623 | 0.956 | 0.347 | 5.08E-182 | Plasma cel HERPUD1 |
| 4026 | EMC7     | 1.00E-185 | 0.533786 | 0.894 | 0.233 | 1.88E-181 | Plasma cel EMC7    |
| 4027 | ANXA5.1  | 2.28E-185 | 0.657786 | 0.926 | 0.263 | 4.28E-181 | Plasma cel ANXA5   |
| 4028 | CYCS     | 2.59E-184 | 0.935358 | 0.913 | 0.31  | 4.86E-180 | Plasma cel CYCS    |
| 4029 | ATOX1.2  | 5.31E-184 | 0.506264 | 0.879 | 0.229 | 9.97E-180 | Plasma cel ATOX1   |
| 4030 | LAPTM5.1 | 6.90E-183 | -1.92415 | 0.681 | 0.873 | 1.30E-178 | Plasma cel LAPTM5  |
| 4031 | UQCC2.1  | 2.59E-181 | 0.314335 | 0.768 | 0.181 | 4.87E-177 | Plasma cel UQCC2   |
| 4032 | GPAA1    | 4.97E-181 | 0.460079 | 0.865 | 0.222 | 9.34E-177 | Plasma cel GPAA1   |
| 4033 | ZBTB8OS  | 1.86E-179 | 0.308753 | 0.837 | 0.203 | 3.49E-175 | Plasma cel ZBTB8OS |
| 4034 | PTPRC.1  | 6.97E-179 | -1.91119 | 0.807 | 0.855 | 1.31E-174 | Plasma cel PTPRC   |
| 4035 | RPL5.2   | 2.33E-178 | -1.10992 | 0.988 | 0.984 | 4.38E-174 | Plasma cel RPL5    |
| 4036 | RPS18.2  | 4.96E-178 | -1.03616 | 0.998 | 0.991 | 9.31E-174 | Plasma cel RPS18   |
| 4037 | HPGD     | 1.74E-177 | 0.35399  | 0.376 | 0.062 | 3.27E-173 | Plasma cel HPGD    |
| 4038 | MRPL27   | 2.20E-177 | 0.267668 | 0.722 | 0.167 | 4.14E-173 | Plasma cel MRPL27  |
| 4039 | MCM5     | 6.97E-177 | 0.454906 | 0.612 | 0.138 | 1.31E-172 | Plasma cel MCM5    |
| 4040 | FDPS     | 1.50E-176 | 0.41606  | 0.855 | 0.217 | 2.82E-172 | Plasma cel FDPS    |
| 4041 | ITGB7.2  | 2.02E-175 | 0.538186 | 0.885 | 0.242 | 3.80E-171 | Plasma cel ITGB7   |
| 4042 | PABPC1.1 | 5.08E-175 | -1.40847 | 0.952 | 0.942 | 9.54E-171 | Plasma cel PABPC1  |
| 4043 | PCNA     | 2.09E-174 | 0.554801 | 0.479 | 0.097 | 3.92E-170 | Plasma cel PCNA    |
| 4044 | IFI35.1  | 2.48E-174 | 0.296185 | 0.821 | 0.202 | 4.65E-170 | Plasma cel IFI35   |
| 4045 | DAD1     | 4.37E-174 | 0.97064  | 0.982 | 0.579 | 8.22E-170 | Plasma cel DAD1    |
| 4046 | ITM2B.2  | 2.68E-173 | -1.63707 | 0.881 | 0.885 | 5.04E-169 | Plasma cel ITM2B   |
| 4047 | RPL3.2   | 1.13E-172 | -1.02412 | 0.988 | 0.986 | 2.13E-168 | Plasma cel RPL3    |
| 4048 | SDF4     | 1.73E-172 | 0.576771 | 0.904 | 0.256 | 3.25E-168 | Plasma cel SDF4    |

|      |           |           |          |       |       |           |                     |
|------|-----------|-----------|----------|-------|-------|-----------|---------------------|
| 4049 | TIMM8B.2  | 1.65E-171 | 0.59027  | 0.897 | 0.255 | 3.10E-167 | Plasma cel TIMM8B   |
| 4050 | SRPRA     | 1.70E-170 | 0.605782 | 0.888 | 0.252 | 3.20E-166 | Plasma cel SRPRA    |
| 4051 | YWHAE.2   | 2.49E-170 | 0.594136 | 0.89  | 0.255 | 4.68E-166 | Plasma cel YWHAE    |
| 4052 | PSMA3     | 2.80E-170 | 0.716843 | 0.902 | 0.279 | 5.26E-166 | Plasma cel PSMA3    |
| 4053 | RPL22.1   | 4.29E-170 | -1.11716 | 0.982 | 0.977 | 8.06E-166 | Plasma cel RPL22    |
| 4054 | IGLV6-57  | 1.68E-169 | 4.720909 | 0.168 | 0.015 | 3.15E-165 | Plasma cel IGLV6-57 |
| 4055 | IGKV1-17  | 2.64E-169 | 4.895101 | 0.122 | 0.008 | 4.95E-165 | Plasma cel IGKV1-17 |
| 4056 | RPL24.2   | 5.57E-168 | -0.93737 | 0.988 | 0.985 | 1.05E-163 | Plasma cel RPL24    |
| 4057 | MRPL37    | 1.30E-167 | 0.354717 | 0.732 | 0.179 | 2.44E-163 | Plasma cel MRPL37   |
| 4058 | RPS4X.2   | 7.50E-167 | -1.00463 | 0.995 | 0.99  | 1.41E-162 | Plasma cel RPS4X    |
| 4059 | IFI27L2.1 | 3.07E-166 | 0.262692 | 0.837 | 0.211 | 5.76E-162 | Plasma cel IFI27L2  |
| 4060 | HSD17B10  | 5.02E-166 | 0.322282 | 0.805 | 0.202 | 9.43E-162 | Plasma cel HSD17B10 |
| 4061 | EIF5B     | 8.03E-166 | 0.262595 | 0.778 | 0.192 | 1.51E-161 | Plasma cel EIF5B    |
| 4062 | LIMD2.2   | 1.91E-165 | -1.39032 | 0.931 | 0.928 | 3.58E-161 | Plasma cel LIMD2    |
| 4063 | TPT1.1    | 2.36E-163 | -1.09062 | 0.991 | 0.994 | 4.44E-159 | Plasma cel TPT1     |
| 4064 | BUD23.1   | 2.94E-163 | 0.444424 | 0.869 | 0.233 | 5.52E-159 | Plasma cel BUD23    |
| 4065 | GORASP2.1 | 1.13E-162 | 0.382768 | 0.842 | 0.22  | 2.12E-158 | Plasma cel GORASP2  |
| 4066 | COPE.1    | 5.61E-162 | 0.954999 | 0.965 | 0.479 | 1.05E-157 | Plasma cel COPE     |
| 4067 | TM9SF2.1  | 8.74E-162 | 0.456728 | 0.858 | 0.234 | 1.64E-157 | Plasma cel TM9SF2   |
| 4068 | AKR1A1.2  | 8.66E-159 | 0.597652 | 0.934 | 0.284 | 1.63E-154 | Plasma cel AKR1A1   |
| 4069 | RPL8.1    | 2.74E-158 | -0.82224 | 0.998 | 0.992 | 5.16E-154 | Plasma cel RPL8     |
| 4070 | MRPL36    | 2.86E-158 | 0.4165   | 0.849 | 0.231 | 5.37E-154 | Plasma cel MRPL36   |
| 4071 | UQCRCQ.1  | 3.46E-158 | 0.984827 | 0.963 | 0.474 | 6.50E-154 | Plasma cel UQCRCQ   |
| 4072 | PPP1R14A  | 4.99E-158 | 0.355875 | 0.445 | 0.088 | 9.37E-154 | Plasma cel PPP1R14A |
| 4073 | TUBA1C.1  | 1.48E-157 | 0.32923  | 0.473 | 0.098 | 2.78E-153 | Plasma cel TUBA1C   |
| 4074 | ARHGDIB.1 | 1.65E-157 | -1.08623 | 0.966 | 0.961 | 3.10E-153 | Plasma cel ARHGDIB  |
| 4075 | RPS5.2    | 4.69E-157 | -1.03772 | 0.991 | 0.984 | 8.81E-153 | Plasma cel RPS5     |
| 4076 | RPL36.2   | 1.18E-156 | -1.02855 | 0.993 | 0.989 | 2.22E-152 | Plasma cel RPL36    |
| 4077 | IGKV1-5   | 5.67E-156 | 5.331522 | 0.206 | 0.024 | 1.06E-151 | Plasma cel IGKV1-5  |
| 4078 | SRSF9     | 9.23E-156 | 0.547086 | 0.906 | 0.268 | 1.73E-151 | Plasma cel SRSF9    |
| 4079 | CFLAR.1   | 2.33E-154 | 0.437199 | 0.901 | 0.257 | 4.38E-150 | Plasma cel CFLAR    |
| 4080 | TMBIM6.1  | 2.96E-154 | 0.893626 | 0.995 | 0.691 | 5.56E-150 | Plasma cel TMBIM6   |
| 4081 | EVL.2     | 1.03E-153 | -2.31058 | 0.376 | 0.744 | 1.93E-149 | Plasma cel EVL      |
| 4082 | ERP44     | 1.09E-152 | 0.438739 | 0.86  | 0.24  | 2.04E-148 | Plasma cel ERP44    |
| 4083 | RPS21.2   | 2.83E-152 | -1.22424 | 0.996 | 0.987 | 5.31E-148 | Plasma cel RPS21    |
| 4084 | PSMB2.1   | 4.72E-152 | 0.746521 | 0.926 | 0.324 | 8.87E-148 | Plasma cel PSMB2    |
| 4085 | TPM4.2    | 5.74E-152 | 0.355944 | 0.846 | 0.237 | 1.08E-147 | Plasma cel TPM4     |
| 4086 | CAPN2.1   | 7.65E-152 | 0.284489 | 0.75  | 0.194 | 1.44E-147 | Plasma cel CAPN2    |
| 4087 | TXNDC17.1 | 1.33E-151 | 0.461694 | 0.814 | 0.227 | 2.49E-147 | Plasma cel TXNDC17  |
| 4088 | ACTB.2    | 1.33E-151 | -1.29351 | 0.986 | 0.999 | 2.49E-147 | Plasma cel ACTB     |
| 4089 | LMNB1.1   | 2.18E-151 | 0.302612 | 0.468 | 0.098 | 4.09E-147 | Plasma cel LMNB1    |
| 4090 | STOML2.1  | 5.47E-151 | 0.542332 | 0.846 | 0.249 | 1.03E-146 | Plasma cel STOML2   |
| 4091 | SRP19     | 8.80E-151 | 0.352177 | 0.844 | 0.23  | 1.65E-146 | Plasma cel SRP19    |
| 4092 | EIF2S1    | 4.59E-150 | 0.283934 | 0.718 | 0.182 | 8.62E-146 | Plasma cel EIF2S1   |
| 4093 | PHPT1.2   | 1.73E-149 | 0.447596 | 0.887 | 0.257 | 3.25E-145 | Plasma cel PHPT1    |
| 4094 | SARAF.2   | 6.36E-149 | -1.61572 | 0.931 | 0.886 | 1.19E-144 | Plasma cel SARAF    |
| 4095 | RABAC1.1  | 1.02E-148 | 0.903876 | 0.979 | 0.463 | 1.92E-144 | Plasma cel RABAC1   |

|      |           |           |          |       |       |           |            |           |
|------|-----------|-----------|----------|-------|-------|-----------|------------|-----------|
| 4096 | IGHG3     | 9.49E-148 | 1.74281  | 0.271 | 0.042 | 1.78E-143 | Plasma cel | IGHG3     |
| 4097 | PRDX1.2   | 1.65E-147 | 1.172623 | 0.959 | 0.532 | 3.10E-143 | Plasma cel | PRDX1     |
| 4098 | IFITM1.2  | 3.49E-147 | -2.91891 | 0.647 | 0.805 | 6.56E-143 | Plasma cel | IFITM1    |
| 4099 | CDK2AP2   | 6.65E-147 | 0.656385 | 0.931 | 0.314 | 1.25E-142 | Plasma cel | CDK2AP2   |
| 4100 | NUDT21    | 1.07E-145 | 0.297653 | 0.793 | 0.212 | 2.01E-141 | Plasma cel | NUDT21    |
| 4101 | GPSM3.1   | 1.44E-145 | -1.68924 | 0.789 | 0.803 | 2.71E-141 | Plasma cel | GPSM3     |
| 4102 | ADI1      | 3.73E-143 | 0.276878 | 0.777 | 0.207 | 7.00E-139 | Plasma cel | ADI1      |
| 4103 | REEP5.2   | 3.08E-142 | 0.619725 | 0.956 | 0.319 | 5.78E-138 | Plasma cel | REEP5     |
| 4104 | GIMAP7.2  | 1.92E-141 | -2.5332  | 0.076 | 0.633 | 3.61E-137 | Plasma cel | GIMAP7    |
| 4105 | COX7A2    | 4.20E-141 | 0.84855  | 0.982 | 0.693 | 7.89E-137 | Plasma cel | COX7A2    |
| 4106 | IGKV1-16  | 8.18E-141 | 4.83158  | 0.11  | 0.008 | 1.54E-136 | Plasma cel | IGKV1-16  |
| 4107 | ANP32E    | 2.79E-138 | 0.383962 | 0.677 | 0.182 | 5.24E-134 | Plasma cel | ANP32E    |
| 4108 | PCBP2.2   | 5.35E-138 | -1.01502 | 0.97  | 0.935 | 1.01E-133 | Plasma cel | PCBP2     |
| 4109 | SLIRP.2   | 8.60E-138 | 0.386688 | 0.791 | 0.226 | 1.62E-133 | Plasma cel | SLIRP     |
| 4110 | MIF.2     | 2.09E-137 | 1.003635 | 0.986 | 0.832 | 3.93E-133 | Plasma cel | MIF       |
| 4111 | HNRNPD    | 1.23E-136 | 0.276851 | 0.718 | 0.193 | 2.31E-132 | Plasma cel | HNRNPD    |
| 4112 | RPA3      | 4.86E-135 | 0.490493 | 0.757 | 0.226 | 9.13E-131 | Plasma cel | RPA3      |
| 4113 | RPS6.2    | 5.15E-135 | -0.88093 | 0.986 | 0.989 | 9.68E-131 | Plasma cel | RPS6      |
| 4114 | TMCO1     | 9.08E-135 | 0.359438 | 0.865 | 0.252 | 1.71E-130 | Plasma cel | TMCO1     |
| 4115 | TXNIP.2   | 1.94E-134 | -1.90737 | 0.629 | 0.772 | 3.64E-130 | Plasma cel | TXNIP     |
| 4116 | COPZ1     | 4.95E-134 | 0.577643 | 0.929 | 0.31  | 9.30E-130 | Plasma cel | COPZ1     |
| 4117 | FAM30A.2  | 7.16E-134 | 0.450551 | 0.418 | 0.09  | 1.35E-129 | Plasma cel | FAM30A    |
| 4118 | PSME2.1   | 7.78E-134 | 1.058804 | 0.965 | 0.646 | 1.46E-129 | Plasma cel | PSME2     |
| 4119 | COX4I1    | 3.07E-133 | -0.85244 | 0.991 | 0.959 | 5.77E-129 | Plasma cel | COX4I1    |
| 4120 | OS9.1     | 4.52E-133 | 0.331267 | 0.833 | 0.239 | 8.49E-129 | Plasma cel | OS9       |
| 4121 | IGLC3.1   | 1.66E-132 | 2.046327 | 0.404 | 0.093 | 3.12E-128 | Plasma cel | IGLC3     |
| 4122 | LIME1.2   | 3.91E-132 | 0.492356 | 0.941 | 0.303 | 7.35E-128 | Plasma cel | LIME1     |
| 4123 | ATP5MC1   | 1.97E-131 | 0.90446  | 0.911 | 0.413 | 3.71E-127 | Plasma cel | ATP5MC1   |
| 4124 | COPS3     | 4.24E-131 | 0.301876 | 0.771 | 0.216 | 7.96E-127 | Plasma cel | COPS3     |
| 4125 | TMEM147   | 1.07E-130 | 0.352111 | 0.855 | 0.25  | 2.01E-126 | Plasma cel | TMEM147   |
| 4126 | EIF4A1.2  | 9.68E-129 | 0.252534 | 0.739 | 0.205 | 1.82E-124 | Plasma cel | EIF4A1    |
| 4127 | NDUFB6.1  | 1.52E-128 | 0.638694 | 0.924 | 0.338 | 2.85E-124 | Plasma cel | NDUFB6    |
| 4128 | CD3E.2    | 5.29E-126 | -3.03678 | 0.099 | 0.605 | 9.93E-122 | Plasma cel | CD3E      |
| 4129 | EEF1B2.2  | 1.15E-125 | -1.00666 | 0.982 | 0.968 | 2.16E-121 | Plasma cel | EEF1B2    |
| 4130 | MCM7.1    | 2.94E-125 | 0.655672 | 0.473 | 0.123 | 5.51E-121 | Plasma cel | MCM7      |
| 4131 | SRGN.1    | 3.58E-125 | 0.447002 | 0.97  | 0.398 | 6.72E-121 | Plasma cel | SRGN      |
| 4132 | RPL7A.2   | 1.00E-124 | -0.63124 | 0.995 | 0.992 | 1.88E-120 | Plasma cel | RPL7A     |
| 4133 | SELL.2    | 1.61E-124 | -2.07562 | 0.61  | 0.76  | 3.02E-120 | Plasma cel | SELL      |
| 4134 | RPL22L1.2 | 1.81E-124 | 0.893042 | 0.961 | 0.457 | 3.40E-120 | Plasma cel | RPL22L1   |
| 4135 | PEBP1.2   | 2.41E-124 | 1.000837 | 0.956 | 0.517 | 4.52E-120 | Plasma cel | PEBP1     |
| 4136 | COX5A.2   | 2.51E-124 | 0.800741 | 0.97  | 0.556 | 4.72E-120 | Plasma cel | COX5A     |
| 4137 | CD19.2    | 5.62E-123 | -0.336   | 0.72  | 0.189 | 1.05E-118 | Plasma cel | CD19      |
| 4138 | RPL21.1   | 1.31E-122 | -1.01538 | 0.984 | 0.969 | 2.46E-118 | Plasma cel | RPL21     |
| 4139 | MYL12B    | 1.86E-122 | -1.37579 | 0.863 | 0.795 | 3.49E-118 | Plasma cel | MYL12B    |
| 4140 | IGKV1D-39 | 2.19E-122 | 3.922707 | 0.119 | 0.011 | 4.11E-118 | Plasma cel | IGKV1D-39 |
| 4141 | LRPAP1.1  | 3.26E-122 | 0.394    | 0.876 | 0.271 | 6.13E-118 | Plasma cel | LRPAP1    |
| 4142 | RPS8.2    | 3.39E-122 | -0.86055 | 0.995 | 0.992 | 6.37E-118 | Plasma cel | RPS8      |

|      |           |           |          |       |       |           |            |          |
|------|-----------|-----------|----------|-------|-------|-----------|------------|----------|
| 4143 | ERGIC3.1  | 5.58E-122 | 0.612089 | 0.952 | 0.353 | 1.05E-117 | Plasma cel | ERGIC3   |
| 4144 | PPA1.1    | 1.49E-121 | 0.745594 | 0.922 | 0.37  | 2.81E-117 | Plasma cel | PPA1     |
| 4145 | RPL10A.2  | 4.56E-121 | -0.96962 | 0.979 | 0.954 | 8.57E-117 | Plasma cel | RPL10A   |
| 4146 | VCP       | 1.45E-120 | 0.714603 | 0.947 | 0.398 | 2.72E-116 | Plasma cel | VCP      |
| 4147 | CD7.2     | 3.61E-120 | -2.7664  | 0.076 | 0.582 | 6.78E-116 | Plasma cel | CD7      |
| 4148 | GIMAP4.2  | 4.29E-120 | -2.13693 | 0.064 | 0.575 | 8.05E-116 | Plasma cel | GIMAP4   |
| 4149 | UFD1      | 2.21E-119 | 0.36749  | 0.846 | 0.26  | 4.15E-115 | Plasma cel | UFD1     |
| 4150 | HMGA1.2   | 7.58E-118 | 0.777385 | 0.72  | 0.238 | 1.42E-113 | Plasma cel | HMGA1    |
| 4151 | FYB1.2    | 1.00E-117 | -2.12741 | 0.08  | 0.577 | 1.88E-113 | Plasma cel | FYB1     |
| 4152 | SH3BGRL3  | 1.41E-117 | -1.45575 | 0.979 | 0.94  | 2.66E-113 | Plasma cel | SH3BGRL3 |
| 4153 | PSMD11    | 1.50E-117 | 0.28399  | 0.793 | 0.234 | 2.82E-113 | Plasma cel | PSMD11   |
| 4154 | MRPS15    | 1.15E-116 | 0.32989  | 0.839 | 0.255 | 2.16E-112 | Plasma cel | MRPS15   |
| 4155 | TUBB4B.1  | 8.85E-116 | 0.74994  | 0.629 | 0.197 | 1.66E-111 | Plasma cel | TUBB4B   |
| 4156 | MRPL52.1  | 2.25E-115 | 0.677623 | 0.959 | 0.403 | 4.23E-111 | Plasma cel | MRPL52   |
| 4157 | FXYD5     | 9.70E-115 | -1.12178 | 0.956 | 0.874 | 1.82E-110 | Plasma cel | FXYD5    |
| 4158 | LCK.2     | 1.64E-113 | -2.12536 | 0.078 | 0.564 | 3.09E-109 | Plasma cel | LCK      |
| 4159 | COX17.1   | 2.58E-113 | 0.421462 | 0.881 | 0.292 | 4.85E-109 | Plasma cel | COX17    |
| 4160 | IGKV1-8   | 1.07E-112 | 3.420309 | 0.101 | 0.008 | 2.01E-108 | Plasma cel | IGKV1-8  |
| 4161 | H2AFV.1   | 1.28E-112 | 0.685527 | 0.883 | 0.354 | 2.40E-108 | Plasma cel | H2AFV    |
| 4162 | NDUFV2    | 1.51E-111 | 0.710768 | 0.959 | 0.469 | 2.83E-107 | Plasma cel | NDUFV2   |
| 4163 | IGHV3-33  | 1.82E-111 | 3.519601 | 0.103 | 0.009 | 3.42E-107 | Plasma cel | IGHV3-33 |
| 4164 | IGHV3-7   | 4.02E-111 | 4.65535  | 0.142 | 0.016 | 7.56E-107 | Plasma cel | IGHV3-7  |
| 4165 | IL32.2    | 4.04E-111 | -3.12183 | 0.108 | 0.574 | 7.60E-107 | Plasma cel | IL32     |
| 4166 | CD52.2    | 5.87E-111 | -1.56467 | 0.83  | 0.826 | 1.10E-106 | Plasma cel | CD52     |
| 4167 | PSMB6.1   | 4.20E-109 | 0.726854 | 0.95  | 0.46  | 7.89E-105 | Plasma cel | PSMB6    |
| 4168 | CD3D.2    | 6.05E-109 | -2.3993  | 0.059 | 0.542 | 1.14E-104 | Plasma cel | CD3D     |
| 4169 | RPLP1.2   | 7.59E-108 | -0.5671  | 0.995 | 0.997 | 1.43E-103 | Plasma cel | RPLP1    |
| 4170 | ATP5MC3   | 8.15E-108 | 0.902984 | 0.975 | 0.675 | 1.53E-103 | Plasma cel | ATP5MC3  |
| 4171 | ROMO1.2   | 1.21E-107 | 0.644624 | 0.973 | 0.428 | 2.26E-103 | Plasma cel | ROMO1    |
| 4172 | EIF3A.1   | 5.80E-107 | 0.279731 | 0.828 | 0.258 | 1.09E-102 | Plasma cel | EIF3A    |
| 4173 | PRDX3.2   | 8.01E-107 | 0.557861 | 0.858 | 0.313 | 1.50E-102 | Plasma cel | PRDX3    |
| 4174 | ATP5PF.1  | 9.55E-107 | 0.731741 | 0.973 | 0.557 | 1.79E-102 | Plasma cel | ATP5PF   |
| 4175 | ACADVL.1  | 1.07E-106 | 0.466839 | 0.902 | 0.313 | 2.01E-102 | Plasma cel | ACADVL   |
| 4176 | MRPL51    | 1.18E-106 | 0.601554 | 0.915 | 0.362 | 2.21E-102 | Plasma cel | MRPL51   |
| 4177 | TIMM17B   | 1.56E-106 | 0.284703 | 0.878 | 0.275 | 2.92E-102 | Plasma cel | TIMM17B  |
| 4178 | ZNF706    | 5.45E-106 | 0.729321 | 0.966 | 0.504 | 1.02E-101 | Plasma cel | ZNF706   |
| 4179 | GAPDH.2   | 1.10E-105 | 1.315604 | 0.984 | 0.901 | 2.07E-101 | Plasma cel | GAPDH    |
| 4180 | VDAC1     | 1.12E-105 | 0.534014 | 0.885 | 0.327 | 2.10E-101 | Plasma cel | VDAC1    |
| 4181 | TYMP.1    | 1.60E-105 | -0.52453 | 0.718 | 0.205 | 3.00E-101 | Plasma cel | TYMP     |
| 4182 | MT-ND4.2  | 3.36E-105 | -0.92994 | 0.996 | 0.956 | 6.31E-101 | Plasma cel | MT-ND4   |
| 4183 | CCR7.2    | 2.02E-104 | -2.29838 | 0.085 | 0.545 | 3.79E-100 | Plasma cel | CCR7     |
| 4184 | SHMT2.1   | 1.38E-103 | 0.385375 | 0.851 | 0.289 | 2.60E-99  | Plasma cel | SHMT2    |
| 4185 | CYC1      | 1.43E-103 | 0.507512 | 0.888 | 0.324 | 2.70E-99  | Plasma cel | CYC1     |
| 4186 | PDCD5.1   | 9.75E-103 | 0.546105 | 0.894 | 0.34  | 1.83E-98  | Plasma cel | PDCD5    |
| 4187 | ATP5F1A.1 | 3.74E-102 | 0.709199 | 0.957 | 0.529 | 7.02E-98  | Plasma cel | ATP5F1A  |
| 4188 | IGHV3-23  | 1.66E-101 | 5.367506 | 0.216 | 0.039 | 3.12E-97  | Plasma cel | IGHV3-23 |
| 4189 | PSMD8     | 3.74E-101 | 0.65619  | 0.94  | 0.424 | 7.03E-97  | Plasma cel | PSMD8    |

|      |           |           |          |       |       |          |                      |
|------|-----------|-----------|----------|-------|-------|----------|----------------------|
| 4190 | PPDPF     | 1.32E-100 | -1.22167 | 0.876 | 0.804 | 2.47E-96 | Plasma cel PPDPF     |
| 4191 | RPL37.2   | 5.26E-100 | -0.89623 | 0.996 | 0.979 | 9.88E-96 | Plasma cel RPL37     |
| 4192 | CYBA.2    | 1.06E-99  | 0.686577 | 0.996 | 0.728 | 1.98E-95 | Plasma cel CYBA      |
| 4193 | BTF3.2    | 9.71E-99  | -0.74697 | 0.977 | 0.955 | 1.82E-94 | Plasma cel BTF3      |
| 4194 | DDX5.2    | 9.74E-98  | -1.11462 | 0.956 | 0.846 | 1.83E-93 | Plasma cel DDX5      |
| 4195 | NDUFS6.1  | 1.38E-97  | 0.50813  | 0.92  | 0.356 | 2.60E-93 | Plasma cel NDUFS6    |
| 4196 | JPT1.1    | 1.73E-95  | 0.508718 | 0.812 | 0.302 | 3.25E-91 | Plasma cel JPT1      |
| 4197 | CCNI.1    | 4.52E-95  | -0.91677 | 0.95  | 0.87  | 8.50E-91 | Plasma cel CCNI      |
| 4198 | IGKV3-11  | 1.05E-94  | 4.967994 | 0.163 | 0.024 | 1.97E-90 | Plasma cel IGKV3-11  |
| 4199 | RER1      | 2.01E-94  | 0.361631 | 0.906 | 0.314 | 3.77E-90 | Plasma cel RER1      |
| 4200 | CHCHD2    | 4.32E-94  | 0.898124 | 0.979 | 0.804 | 8.11E-90 | Plasma cel CHCHD2    |
| 4201 | TOMM7.2   | 9.57E-93  | -1.07122 | 0.931 | 0.819 | 1.80E-88 | Plasma cel TOMM7     |
| 4202 | COX7B.1   | 1.07E-92  | 0.668344 | 0.965 | 0.485 | 2.00E-88 | Plasma cel COX7B     |
| 4203 | PFN1.2    | 3.01E-92  | -0.88239 | 0.973 | 0.984 | 5.65E-88 | Plasma cel PFN1      |
| 4204 | RPS27L.1  | 5.12E-92  | 0.597803 | 0.94  | 0.409 | 9.62E-88 | Plasma cel RPS27L    |
| 4205 | MRPS7     | 7.60E-92  | 0.285238 | 0.83  | 0.278 | 1.43E-87 | Plasma cel MRPS7     |
| 4206 | SRSF2     | 1.04E-90  | 0.658804 | 0.911 | 0.404 | 1.94E-86 | Plasma cel SRSF2     |
| 4207 | DNAJC15.1 | 8.00E-90  | 0.344268 | 0.924 | 0.329 | 1.50E-85 | Plasma cel DNAJC15   |
| 4208 | EMC4      | 1.07E-89  | 0.308882 | 0.871 | 0.299 | 2.01E-85 | Plasma cel EMC4      |
| 4209 | LSM3      | 2.53E-89  | 0.422117 | 0.848 | 0.318 | 4.76E-85 | Plasma cel LSM3      |
| 4210 | HIST1H1E  | 8.04E-89  | 0.411655 | 0.624 | 0.203 | 1.51E-84 | Plasma cel HIST1H1E  |
| 4211 | PARP1.1   | 1.13E-88  | 0.400029 | 0.906 | 0.339 | 2.13E-84 | Plasma cel PARP1     |
| 4212 | IGKV3-15  | 1.66E-88  | 4.942541 | 0.158 | 0.024 | 3.11E-84 | Plasma cel IGKV3-15  |
| 4213 | IGHV4-39  | 4.49E-88  | 5.481076 | 0.168 | 0.027 | 8.43E-84 | Plasma cel IGHV4-39  |
| 4214 | FTH1.1    | 5.92E-88  | -1.33341 | 0.98  | 0.982 | 1.11E-83 | Plasma cel FTH1      |
| 4215 | SERP1.1   | 6.12E-88  | 0.653968 | 0.982 | 0.773 | 1.15E-83 | Plasma cel SERP1     |
| 4216 | SSR2.1    | 9.82E-88  | 0.627818 | 0.993 | 0.738 | 1.85E-83 | Plasma cel SSR2      |
| 4217 | SRSF5.1   | 5.24E-87  | -1.26158 | 0.867 | 0.754 | 9.85E-83 | Plasma cel SRSF5     |
| 4218 | SMARCB1.  | 1.01E-86  | 0.289115 | 0.888 | 0.311 | 1.89E-82 | Plasma cel SMARCB1   |
| 4219 | POMP.1    | 1.06E-86  | 0.599391 | 0.956 | 0.457 | 1.99E-82 | Plasma cel POMP      |
| 4220 | CCR9      | 1.10E-86  | 0.280704 | 0.105 | 0.011 | 2.06E-82 | Plasma cel CCR9      |
| 4221 | ITGB1     | 2.28E-85  | 0.486525 | 0.58  | 0.197 | 4.28E-81 | Plasma cel ITGB1     |
| 4222 | PDIA3.1   | 3.16E-85  | 0.624555 | 0.961 | 0.503 | 5.94E-81 | Plasma cel PDIA3     |
| 4223 | ATP6V0B.1 | 7.12E-85  | 0.519584 | 0.954 | 0.443 | 1.34E-80 | Plasma cel ATP6V0B   |
| 4224 | KRTCAP2   | 6.55E-84  | 0.616868 | 0.988 | 0.596 | 1.23E-79 | Plasma cel KRTCAP2   |
| 4225 | CORO1A.1  | 9.85E-84  | -0.84306 | 0.94  | 0.922 | 1.85E-79 | Plasma cel CORO1A    |
| 4226 | IL7R.2    | 2.30E-83  | -2.51517 | 0.064 | 0.473 | 4.31E-79 | Plasma cel IL7R      |
| 4227 | IFITM3.2  | 4.91E-83  | -2.48505 | 0.207 | 0.554 | 9.23E-79 | Plasma cel IFITM3    |
| 4228 | DAZAP2.1  | 9.34E-83  | -1.12899 | 0.867 | 0.745 | 1.75E-78 | Plasma cel DAZAP2    |
| 4229 | NDUFA6.1  | 1.16E-82  | 0.497053 | 0.924 | 0.389 | 2.17E-78 | Plasma cel NDUFA6    |
| 4230 | HSPD1.2   | 9.89E-82  | 0.960135 | 0.887 | 0.447 | 1.86E-77 | Plasma cel HSPD1     |
| 4231 | RPL23A.1  | 2.04E-81  | -0.68894 | 0.98  | 0.963 | 3.84E-77 | Plasma cel RPL23A    |
| 4232 | EIF1.2    | 4.55E-81  | -0.64587 | 0.989 | 0.977 | 8.54E-77 | Plasma cel EIF1      |
| 4233 | IGKV1-39  | 6.58E-81  | 3.890616 | 0.105 | 0.012 | 1.24E-76 | Plasma cel IGKV1-39  |
| 4234 | LINC00861 | 1.42E-80  | -1.82062 | 0.053 | 0.454 | 2.66E-76 | Plasma cel LINC00861 |
| 4235 | COX6A1.1  | 4.12E-80  | 0.63366  | 0.986 | 0.767 | 7.74E-76 | Plasma cel COX6A1    |
| 4236 | ELOC      | 5.93E-79  | 0.359462 | 0.879 | 0.334 | 1.11E-74 | Plasma cel ELOC      |

|      |            |          |          |       |       |          |                     |
|------|------------|----------|----------|-------|-------|----------|---------------------|
| 4237 | ITGB2.2    | 8.41E-79 | -1.94425 | 0.537 | 0.648 | 1.58E-74 | Plasma cel ITGB2    |
| 4238 | CNBP.1     | 1.31E-78 | -0.91444 | 0.908 | 0.806 | 2.46E-74 | Plasma cel CNBP     |
| 4239 | OST4       | 1.84E-78 | 0.509924 | 0.982 | 0.836 | 3.46E-74 | Plasma cel OST4     |
| 4240 | HLA-C.1    | 1.79E-77 | -0.84701 | 0.995 | 0.983 | 3.37E-73 | Plasma cel HLA-C    |
| 4241 | RPSA.1     | 2.35E-77 | -0.81746 | 0.973 | 0.939 | 4.42E-73 | Plasma cel RPSA     |
| 4242 | EIF2S2     | 9.16E-77 | 0.312727 | 0.883 | 0.331 | 1.72E-72 | Plasma cel EIF2S2   |
| 4243 | ZFP36L1.1  | 1.79E-76 | -1.73548 | 0.239 | 0.543 | 3.35E-72 | Plasma cel ZFP36L1  |
| 4244 | NUCB2.2    | 4.96E-76 | 0.386505 | 0.879 | 0.355 | 9.32E-72 | Plasma cel NUCB2    |
| 4245 | NDUFAB1    | 5.55E-76 | 0.543013 | 0.929 | 0.44  | 1.04E-71 | Plasma cel NDUFAB1  |
| 4246 | UBE2L3     | 2.29E-75 | 0.286976 | 0.867 | 0.318 | 4.30E-71 | Plasma cel UBE2L3   |
| 4247 | PSMA5      | 2.62E-75 | 0.489949 | 0.901 | 0.403 | 4.92E-71 | Plasma cel PSMA5    |
| 4248 | PSMA4.1    | 4.16E-75 | 0.293686 | 0.869 | 0.324 | 7.82E-71 | Plasma cel PSMA4    |
| 4249 | MT-ND2.2   | 1.31E-74 | -0.98422 | 0.975 | 0.848 | 2.45E-70 | Plasma cel MT-ND2   |
| 4250 | NDUFB3.1   | 1.43E-74 | 0.458369 | 0.91  | 0.394 | 2.68E-70 | Plasma cel NDUFB3   |
| 4251 | UBXN1      | 4.89E-74 | -1.17306 | 0.807 | 0.717 | 9.18E-70 | Plasma cel UBXN1    |
| 4252 | RANBP1.1   | 1.18E-73 | 0.455931 | 0.761 | 0.308 | 2.21E-69 | Plasma cel RANBP1   |
| 4253 | HAX1.1     | 1.72E-73 | 0.359821 | 0.902 | 0.358 | 3.23E-69 | Plasma cel HAX1     |
| 4254 | LDHA.1     | 2.65E-73 | 0.997213 | 0.943 | 0.588 | 4.98E-69 | Plasma cel LDHA     |
| 4255 | AES.2      | 4.42E-73 | -1.37715 | 0.748 | 0.731 | 8.30E-69 | Plasma cel AES      |
| 4256 | SNRPC      | 4.98E-73 | 0.304986 | 0.862 | 0.328 | 9.35E-69 | Plasma cel SNRPC    |
| 4257 | AURKAIP1.  | 6.91E-73 | 0.458962 | 0.936 | 0.417 | 1.30E-68 | Plasma cel AURKAIP1 |
| 4258 | ATP6V1G1   | 1.24E-72 | -0.83894 | 0.94  | 0.788 | 2.33E-68 | Plasma cel ATP6V1G1 |
| 4259 | H2AFZ.1    | 4.64E-71 | 1.277223 | 0.908 | 0.519 | 8.72E-67 | Plasma cel H2AFZ    |
| 4260 | TCF7.2     | 5.22E-71 | -1.87937 | 0.05  | 0.419 | 9.80E-67 | Plasma cel TCF7     |
| 4261 | CD3G.2     | 5.38E-71 | -1.57306 | 0.044 | 0.415 | 1.01E-66 | Plasma cel CD3G     |
| 4262 | MT-ND3.1   | 5.66E-71 | -0.7742  | 0.995 | 0.971 | 1.06E-66 | Plasma cel MT-ND3   |
| 4263 | IGKV3-20   | 7.85E-71 | 5.389397 | 0.202 | 0.044 | 1.48E-66 | Plasma cel IGKV3-20 |
| 4264 | GZMM.2     | 2.23E-70 | -1.64206 | 0.044 | 0.413 | 4.18E-66 | Plasma cel GZMM     |
| 4265 | NAMPT.1    | 2.52E-70 | -0.40349 | 0.445 | 0.131 | 4.73E-66 | Plasma cel NAMPT    |
| 4266 | UQCRC1.1   | 2.58E-70 | 0.259176 | 0.858 | 0.32  | 4.84E-66 | Plasma cel UQCRC1   |
| 4267 | STMN1.2    | 2.75E-70 | 0.870888 | 0.592 | 0.276 | 5.17E-66 | Plasma cel STMN1    |
| 4268 | MMADHC.    | 6.36E-69 | 0.270258 | 0.862 | 0.327 | 1.20E-64 | Plasma cel MMADHC   |
| 4269 | HMGB2.2    | 5.28E-68 | 0.929651 | 0.59  | 0.266 | 9.92E-64 | Plasma cel HMGB2    |
| 4270 | CAPZB.1    | 3.49E-67 | -1.01409 | 0.872 | 0.735 | 6.55E-63 | Plasma cel CAPZB    |
| 4271 | LBH.2      | 5.59E-67 | -1.52774 | 0.19  | 0.492 | 1.05E-62 | Plasma cel LBH      |
| 4272 | TBC1D10C.  | 8.53E-67 | -1.4695  | 0.69  | 0.662 | 1.60E-62 | Plasma cel TBC1D10C |
| 4273 | IGHV3-48   | 1.04E-66 | 4.323971 | 0.112 | 0.016 | 1.95E-62 | Plasma cel IGHV3-48 |
| 4274 | C12orf57.1 | 1.15E-66 | -1.24521 | 0.901 | 0.755 | 2.15E-62 | Plasma cel C12orf57 |
| 4275 | RAC2.2     | 1.66E-66 | -0.75816 | 0.968 | 0.906 | 3.11E-62 | Plasma cel RAC2     |
| 4276 | PRDX5.1    | 2.05E-66 | 0.48996  | 0.966 | 0.533 | 3.85E-62 | Plasma cel PRDX5    |
| 4277 | EEF2.2     | 3.32E-66 | -0.67306 | 0.977 | 0.935 | 6.23E-62 | Plasma cel EEF2     |
| 4278 | SNRPG      | 5.69E-66 | 0.617138 | 0.938 | 0.515 | 1.07E-61 | Plasma cel SNRPG    |
| 4279 | PGD.2      | 6.34E-66 | -0.27487 | 0.645 | 0.214 | 1.19E-61 | Plasma cel PGD      |
| 4280 | PSMB3.1    | 1.28E-65 | 0.527486 | 0.941 | 0.503 | 2.41E-61 | Plasma cel PSMB3    |
| 4281 | IGHV4-59   | 1.37E-65 | 3.820201 | 0.133 | 0.023 | 2.57E-61 | Plasma cel IGHV4-59 |
| 4282 | ADRM1      | 4.17E-65 | 0.302904 | 0.879 | 0.352 | 7.83E-61 | Plasma cel ADRM1    |
| 4283 | CFL1.2     | 6.53E-65 | -0.7329  | 0.968 | 0.953 | 1.23E-60 | Plasma cel CFL1     |

|      |            |          |          |       |       |          |                       |
|------|------------|----------|----------|-------|-------|----------|-----------------------|
| 4284 | PRDX2.2    | 7.05E-65 | 0.472979 | 0.906 | 0.427 | 1.33E-60 | Plasma cel PRDX2      |
| 4285 | TRABD      | 1.49E-64 | 0.290847 | 0.901 | 0.361 | 2.79E-60 | Plasma cel TRABD      |
| 4286 | SNRPD1.1   | 2.63E-64 | 0.359005 | 0.823 | 0.342 | 4.95E-60 | Plasma cel SNRPD1     |
| 4287 | SET.1      | 2.85E-64 | 0.365579 | 0.89  | 0.382 | 5.36E-60 | Plasma cel SET        |
| 4288 | CD247.2    | 6.54E-64 | -1.56539 | 0.043 | 0.388 | 1.23E-59 | Plasma cel CD247      |
| 4289 | IGLV2-11   | 1.31E-63 | 4.471366 | 0.108 | 0.016 | 2.47E-59 | Plasma cel IGLV2-11   |
| 4290 | ITGA4      | 4.11E-63 | 0.255189 | 0.867 | 0.348 | 7.72E-59 | Plasma cel ITGA4      |
| 4291 | C1orf162.2 | 9.40E-63 | -1.33604 | 0.028 | 0.371 | 1.77E-58 | Plasma cel C1orf162   |
| 4292 | GADD45GIP1 | 6.55E-62 | 0.253546 | 0.899 | 0.36  | 1.23E-57 | Plasma cel GADD45GIP1 |
| 4293 | CLIC1.2    | 1.02E-61 | 0.518005 | 0.988 | 0.694 | 1.91E-57 | Plasma cel CLIC1      |
| 4294 | CCND3.1    | 1.35E-61 | -1.45999 | 0.454 | 0.589 | 2.54E-57 | Plasma cel CCND3      |
| 4295 | BIN1.2     | 1.39E-61 | -1.35785 | 0.188 | 0.475 | 2.60E-57 | Plasma cel BIN1       |
| 4296 | IGLV1-44   | 1.77E-61 | 5.682856 | 0.145 | 0.028 | 3.32E-57 | Plasma cel IGLV1-44   |
| 4297 | NDUFB7.1   | 2.42E-61 | 0.394586 | 0.949 | 0.451 | 4.54E-57 | Plasma cel NDUFB7     |
| 4298 | ZFP36L2.2  | 5.18E-61 | -1.61474 | 0.557 | 0.63  | 9.73E-57 | Plasma cel ZFP36L2    |
| 4299 | IGHV3-30   | 1.62E-60 | 4.730743 | 0.152 | 0.03  | 3.04E-56 | Plasma cel IGHV3-30   |
| 4300 | DYNLL1.2   | 2.12E-60 | 0.352751 | 0.918 | 0.411 | 3.99E-56 | Plasma cel DYNLL1     |
| 4301 | HNRNPA1.   | 8.48E-60 | -0.66267 | 0.965 | 0.925 | 1.59E-55 | Plasma cel HNRNPA1    |
| 4302 | GRN.1      | 1.26E-59 | -0.58421 | 0.668 | 0.228 | 2.36E-55 | Plasma cel GRN        |
| 4303 | IGHV4-34   | 2.44E-59 | 3.773185 | 0.158 | 0.032 | 4.59E-55 | Plasma cel IGHV4-34   |
| 4304 | PSMA6.1    | 3.51E-58 | 0.355351 | 0.902 | 0.394 | 6.59E-54 | Plasma cel PSMA6      |
| 4305 | TRIM22     | 7.75E-58 | -1.23474 | 0.083 | 0.397 | 1.45E-53 | Plasma cel TRIM22     |
| 4306 | RPL31.2    | 1.61E-57 | -0.68797 | 0.966 | 0.876 | 3.03E-53 | Plasma cel RPL31      |
| 4307 | DENND2D.   | 1.57E-55 | -1.3905  | 0.119 | 0.413 | 2.95E-51 | Plasma cel DENND2D    |
| 4308 | B2M.2      | 1.62E-55 | -0.45805 | 0.998 | 0.999 | 3.05E-51 | Plasma cel B2M        |
| 4309 | RPL15.2    | 5.42E-55 | -0.46491 | 0.989 | 0.981 | 1.02E-50 | Plasma cel RPL15      |
| 4310 | SNRPE.1    | 5.64E-55 | 0.251836 | 0.794 | 0.334 | 1.06E-50 | Plasma cel SNRPE      |
| 4311 | TSC22D3    | 9.78E-55 | -1.54055 | 0.525 | 0.618 | 1.84E-50 | Plasma cel TSC22D3    |
| 4312 | LEF1.2     | 2.28E-54 | -1.77763 | 0.16  | 0.434 | 4.28E-50 | Plasma cel LEF1       |
| 4313 | ANXA1.2    | 3.25E-54 | -1.82931 | 0.046 | 0.354 | 6.11E-50 | Plasma cel ANXA1      |
| 4314 | RPLP2.2    | 4.34E-54 | -0.55632 | 0.988 | 0.969 | 8.15E-50 | Plasma cel RPLP2      |
| 4315 | H3F3B.1    | 8.02E-54 | -0.68612 | 0.991 | 0.95  | 1.51E-49 | Plasma cel H3F3B      |
| 4316 | ARPC3.1    | 1.03E-53 | -0.69726 | 0.972 | 0.906 | 1.94E-49 | Plasma cel ARPC3      |
| 4317 | TOMM5.1    | 1.25E-53 | 0.268381 | 0.858 | 0.367 | 2.34E-49 | Plasma cel TOMM5      |
| 4318 | UQCRH.1    | 1.36E-53 | 0.508072 | 0.973 | 0.77  | 2.56E-49 | Plasma cel UQCRH      |
| 4319 | CCT8.2     | 1.58E-53 | 0.444363 | 0.915 | 0.467 | 2.97E-49 | Plasma cel CCT8       |
| 4320 | RHOA.1     | 1.71E-53 | -0.70734 | 0.95  | 0.873 | 3.20E-49 | Plasma cel RHOA       |
| 4321 | IGHV3-21   | 1.93E-53 | 4.887786 | 0.129 | 0.025 | 3.63E-49 | Plasma cel IGHV3-21   |
| 4322 | IGLV1-51   | 3.63E-53 | 5.560685 | 0.112 | 0.02  | 6.81E-49 | Plasma cel IGLV1-51   |
| 4323 | UCP2.2     | 4.87E-53 | -0.99022 | 0.901 | 0.778 | 9.15E-49 | Plasma cel UCP2       |
| 4324 | MRPS34     | 4.96E-53 | 0.333734 | 0.915 | 0.413 | 9.32E-49 | Plasma cel MRPS34     |
| 4325 | FTL.1      | 8.42E-53 | -1.23014 | 0.991 | 0.993 | 1.58E-48 | Plasma cel FTL        |
| 4326 | SF3B5.1    | 9.70E-53 | 0.387659 | 0.934 | 0.454 | 1.82E-48 | Plasma cel SF3B5      |
| 4327 | NME2.1     | 1.50E-52 | 0.486187 | 0.975 | 0.607 | 2.82E-48 | Plasma cel NME2       |
| 4328 | EIF5       | 1.95E-52 | 0.333072 | 0.888 | 0.404 | 3.66E-48 | Plasma cel EIF5       |
| 4329 | RALGPS2.1  | 2.66E-52 | -0.50387 | 0.587 | 0.207 | 5.00E-48 | Plasma cel RALGPS2    |
| 4330 | UBXN4      | 4.85E-52 | 0.299838 | 0.933 | 0.413 | 9.11E-48 | Plasma cel UBXN4      |



|      |           |          |          |       |       |          |                     |
|------|-----------|----------|----------|-------|-------|----------|---------------------|
| 4331 | EIF5A.1   | 6.83E-52 | 0.519481 | 0.927 | 0.525 | 1.28E-47 | Plasma cel EIF5A    |
| 4332 | POLR2L.1  | 8.23E-52 | 0.420054 | 0.972 | 0.532 | 1.55E-47 | Plasma cel POLR2L   |
| 4333 | UBA52     | 1.02E-51 | -0.51331 | 0.988 | 0.954 | 1.92E-47 | Plasma cel UBA52    |
| 4334 | NDUFAF3   | 1.64E-51 | 0.263278 | 0.92  | 0.401 | 3.07E-47 | Plasma cel NDUFAF3  |
| 4335 | TUFM.1    | 2.95E-51 | 0.406325 | 0.927 | 0.483 | 5.54E-47 | Plasma cel TUFM     |
| 4336 | FCMR.2    | 4.22E-51 | -1.59574 | 0.496 | 0.578 | 7.93E-47 | Plasma cel FCMR     |
| 4337 | IGLV1-47  | 5.47E-51 | 4.808214 | 0.129 | 0.026 | 1.03E-46 | Plasma cel IGLV1-47 |
| 4338 | PCBP1.2   | 5.88E-51 | -0.647   | 0.956 | 0.873 | 1.10E-46 | Plasma cel PCBP1    |
| 4339 | CIRBP.1   | 5.98E-51 | -0.89793 | 0.913 | 0.764 | 1.12E-46 | Plasma cel CIRBP    |
| 4340 | TRBC2.1   | 8.92E-51 | -1.31277 | 0.667 | 0.677 | 1.68E-46 | Plasma cel TRBC2    |
| 4341 | SEC11A.1  | 3.09E-50 | 0.311535 | 0.926 | 0.425 | 5.81E-46 | Plasma cel SEC11A   |
| 4342 | CD2.2     | 3.18E-50 | -1.19475 | 0.032 | 0.324 | 5.97E-46 | Plasma cel CD2      |
| 4343 | GSTP1.2   | 4.60E-50 | 0.401963 | 0.933 | 0.525 | 8.65E-46 | Plasma cel GSTP1    |
| 4344 | SOD2.1    | 5.47E-50 | -0.36909 | 0.535 | 0.188 | 1.03E-45 | Plasma cel SOD2     |
| 4345 | EIF3H.1   | 6.79E-50 | -0.79197 | 0.922 | 0.751 | 1.28E-45 | Plasma cel EIF3H    |
| 4346 | ATP5MC2.  | 6.82E-50 | -0.50548 | 0.98  | 0.944 | 1.28E-45 | Plasma cel ATP5MC2  |
| 4347 | PSMB1     | 8.28E-50 | 0.440678 | 0.95  | 0.553 | 1.56E-45 | Plasma cel PSMB1    |
| 4348 | NDUFA1.1  | 1.39E-49 | 0.423827 | 0.982 | 0.617 | 2.61E-45 | Plasma cel NDUFA1   |
| 4349 | APMAP     | 2.94E-49 | -0.4298  | 0.598 | 0.214 | 5.51E-45 | Plasma cel APMAP    |
| 4350 | ANAPC11.  | 3.22E-49 | 0.33811  | 0.883 | 0.424 | 6.05E-45 | Plasma cel ANAPC11  |
| 4351 | CHCHD10   | 3.47E-49 | 0.298925 | 0.917 | 0.432 | 6.52E-45 | Plasma cel CHCHD10  |
| 4352 | CD27.2    | 5.12E-49 | 0.372435 | 0.871 | 0.414 | 9.62E-45 | Plasma cel CD27     |
| 4353 | DUT.2     | 1.13E-48 | 0.50042  | 0.732 | 0.359 | 2.11E-44 | Plasma cel DUT      |
| 4354 | CALM1.2   | 1.25E-48 | -0.7299  | 0.941 | 0.878 | 2.34E-44 | Plasma cel CALM1    |
| 4355 | EIF3G.1   | 1.78E-48 | -0.74443 | 0.943 | 0.762 | 3.35E-44 | Plasma cel EIF3G    |
| 4356 | FOXP1.1   | 4.04E-48 | -1.31421 | 0.2   | 0.437 | 7.59E-44 | Plasma cel FOXP1    |
| 4357 | PNRC1.1   | 9.78E-48 | -1.39955 | 0.589 | 0.599 | 1.84E-43 | Plasma cel PNRC1    |
| 4358 | ARL6IP5   | 3.64E-47 | -1.14691 | 0.741 | 0.643 | 6.84E-43 | Plasma cel ARL6IP5  |
| 4359 | RPL4.1    | 9.21E-47 | -0.62776 | 0.979 | 0.906 | 1.73E-42 | Plasma cel RPL4     |
| 4360 | SPOCK2.2  | 9.98E-47 | -1.10837 | 0.055 | 0.331 | 1.87E-42 | Plasma cel SPOCK2   |
| 4361 | NOSIP.2   | 1.17E-46 | -1.85549 | 0.752 | 0.632 | 2.19E-42 | Plasma cel NOSIP    |
| 4362 | NOP53.1   | 6.29E-46 | -1.27804 | 0.773 | 0.644 | 1.18E-41 | Plasma cel NOP53    |
| 4363 | NOL7      | 6.67E-46 | 0.268284 | 0.915 | 0.41  | 1.25E-41 | Plasma cel NOL7     |
| 4364 | ATP5F1B   | 9.05E-46 | 0.503204 | 0.952 | 0.69  | 1.70E-41 | Plasma cel ATP5F1B  |
| 4365 | PGAM1.1   | 1.19E-45 | 0.457923 | 0.908 | 0.492 | 2.23E-41 | Plasma cel PGAM1    |
| 4366 | HSPB1.2   | 1.20E-45 | -1.36766 | 0.273 | 0.469 | 2.26E-41 | Plasma cel HSPB1    |
| 4367 | ERH       | 1.21E-45 | 0.398138 | 0.938 | 0.534 | 2.28E-41 | Plasma cel ERH      |
| 4368 | CD79B.2   | 1.37E-45 | -0.81041 | 0.816 | 0.303 | 2.58E-41 | Plasma cel CD79B    |
| 4369 | ILF2.2    | 1.70E-45 | 0.338926 | 0.888 | 0.438 | 3.19E-41 | Plasma cel ILF2     |
| 4370 | PRELID1.1 | 2.60E-45 | 0.34176  | 0.934 | 0.506 | 4.88E-41 | Plasma cel PRELID1  |
| 4371 | EIF3F.1   | 1.44E-44 | -0.6731  | 0.929 | 0.783 | 2.71E-40 | Plasma cel EIF3F    |
| 4372 | LHPP.1    | 1.84E-44 | -0.2789  | 0.44  | 0.155 | 3.46E-40 | Plasma cel LHPP     |
| 4373 | TECR.1    | 1.76E-43 | 0.257941 | 0.926 | 0.437 | 3.31E-39 | Plasma cel TECR     |
| 4374 | ALOX5AP.2 | 3.45E-43 | -1.3062  | 0.112 | 0.364 | 6.48E-39 | Plasma cel ALOX5AP  |
| 4375 | HSPE1.1   | 3.57E-43 | 0.584682 | 0.901 | 0.49  | 6.71E-39 | Plasma cel HSPE1    |
| 4376 | JAK1.2    | 5.43E-43 | -1.18371 | 0.785 | 0.639 | 1.02E-38 | Plasma cel JAK1     |
| 4377 | OPTN.1    | 6.56E-43 | -0.27771 | 0.489 | 0.179 | 1.23E-38 | Plasma cel OPTN     |

|                |          |          |       |       |          |                     |
|----------------|----------|----------|-------|-------|----------|---------------------|
| 4378 MDH2.1    | 1.09E-42 | 0.322801 | 0.911 | 0.451 | 2.04E-38 | Plasma cel MDH2     |
| 4379 NDUFB4    | 1.15E-42 | 0.380766 | 0.961 | 0.561 | 2.16E-38 | Plasma cel NDUFB4   |
| 4380 RPL36AL.1 | 5.21E-42 | 0.32531  | 0.988 | 0.899 | 9.79E-38 | Plasma cel RPL36AL  |
| 4381 GNG5.1    | 8.10E-42 | 0.350052 | 0.975 | 0.63  | 1.52E-37 | Plasma cel GNG5     |
| 4382 GABARAP.  | 8.75E-42 | -0.78674 | 0.968 | 0.82  | 1.64E-37 | Plasma cel GABARAP  |
| 4383 ADK       | 1.26E-41 | -0.28939 | 0.55  | 0.207 | 2.37E-37 | Plasma cel ADK      |
| 4384 SKP1.1    | 2.00E-41 | -0.63211 | 0.94  | 0.799 | 3.76E-37 | Plasma cel SKP1     |
| 4385 SEPT7.1   | 2.72E-41 | -1.02744 | 0.8   | 0.651 | 5.11E-37 | Plasma cel Sep-07   |
| 4386 PRPF4B    | 5.23E-41 | -0.25689 | 0.544 | 0.205 | 9.82E-37 | Plasma cel PRPF4B   |
| 4387 YWHAZ.2   | 5.90E-41 | -0.69916 | 0.929 | 0.803 | 1.11E-36 | Plasma cel YWHAZ    |
| 4388 SKAP2.1   | 2.05E-40 | -0.25746 | 0.388 | 0.138 | 3.86E-36 | Plasma cel SKAP2    |
| 4389 CDCA7L.1  | 2.90E-40 | -0.29164 | 0.436 | 0.16  | 5.45E-36 | Plasma cel CDCA7L   |
| 4390 ATP5F1E.1 | 3.15E-40 | -0.48104 | 0.993 | 0.972 | 5.92E-36 | Plasma cel ATP5F1E  |
| 4391 ZFAND5.1  | 3.17E-40 | -0.26046 | 0.477 | 0.177 | 5.96E-36 | Plasma cel ZFAND5   |
| 4392 POLR2B    | 4.38E-40 | -0.27634 | 0.525 | 0.197 | 8.22E-36 | Plasma cel POLR2B   |
| 4393 PRR13.1   | 5.80E-40 | -0.96123 | 0.83  | 0.655 | 1.09E-35 | Plasma cel PRR13    |
| 4394 GSTK1     | 6.19E-40 | -0.96873 | 0.885 | 0.674 | 1.16E-35 | Plasma cel GSTK1    |
| 4395 DEK.1     | 7.70E-40 | -1.00293 | 0.089 | 0.33  | 1.45E-35 | Plasma cel DEK      |
| 4396 RASA2.1   | 1.09E-39 | -0.25388 | 0.52  | 0.196 | 2.05E-35 | Plasma cel RASA2    |
| 4397 PIK3IP1.2 | 1.73E-39 | -1.05308 | 0.064 | 0.306 | 3.24E-35 | Plasma cel PIK3IP1  |
| 4398 SHARPIN   | 1.77E-39 | -0.25397 | 0.56  | 0.213 | 3.33E-35 | Plasma cel SHARPIN  |
| 4399 TPM3.1    | 1.82E-39 | -0.80473 | 0.906 | 0.726 | 3.42E-35 | Plasma cel TPM3     |
| 4400 SERPINB1. | 1.93E-39 | -1.36224 | 0.277 | 0.449 | 3.63E-35 | Plasma cel SERPINB1 |
| 4401 TUBA1A.2  | 2.23E-39 | -1.30293 | 0.222 | 0.423 | 4.19E-35 | Plasma cel TUBA1A   |
| 4402 HNRNPDL   | 2.23E-39 | -0.66679 | 0.938 | 0.823 | 4.20E-35 | Plasma cel HNRNPDL  |
| 4403 RAB10.1   | 2.48E-39 | -0.26797 | 0.603 | 0.231 | 4.66E-35 | Plasma cel RAB10    |
| 4404 ACTR10    | 4.23E-39 | -0.25214 | 0.514 | 0.194 | 7.94E-35 | Plasma cel ACTR10   |
| 4405 MAL.2     | 4.93E-39 | -1.06292 | 0.03  | 0.271 | 9.25E-35 | Plasma cel MAL      |
| 4406 GMFG.2    | 7.25E-39 | -0.70982 | 0.95  | 0.763 | 1.36E-34 | Plasma cel GMFG     |
| 4407 ATP5F1C.1 | 7.75E-39 | 0.350639 | 0.949 | 0.53  | 1.46E-34 | Plasma cel ATP5F1C  |
| 4408 C18orf32  | 1.20E-38 | -0.26572 | 0.465 | 0.174 | 2.26E-34 | Plasma cel C18orf32 |
| 4409 RNF13.1   | 1.82E-38 | -0.25818 | 0.555 | 0.213 | 3.43E-34 | Plasma cel RNF13    |
| 4410 IDI1      | 2.42E-38 | -0.26639 | 0.472 | 0.177 | 4.55E-34 | Plasma cel IDI1     |
| 4411 NDUFS5.1  | 2.52E-38 | 0.345755 | 0.95  | 0.544 | 4.73E-34 | Plasma cel NDUFS5   |
| 4412 ACTN1.1   | 3.34E-38 | -0.91817 | 0.023 | 0.261 | 6.27E-34 | Plasma cel ACTN1    |
| 4413 BRK1      | 5.14E-38 | -0.71796 | 0.915 | 0.705 | 9.65E-34 | Plasma cel BRK1     |
| 4414 AIF1.2    | 5.49E-38 | -2.01413 | 0.051 | 0.29  | 1.03E-33 | Plasma cel AIF1     |
| 4415 NEAT1.1   | 7.18E-38 | -0.47632 | 0.777 | 0.319 | 1.35E-33 | Plasma cel NEAT1    |
| 4416 RBM22     | 9.69E-38 | -0.25541 | 0.484 | 0.184 | 1.82E-33 | Plasma cel RBM22    |
| 4417 TRBC1.2   | 1.27E-37 | -1.56498 | 0.073 | 0.307 | 2.39E-33 | Plasma cel TRBC1    |
| 4418 PPIA.1    | 2.01E-37 | 0.482267 | 0.989 | 0.949 | 3.78E-33 | Plasma cel PPIA     |
| 4419 PAXX.1    | 2.83E-37 | -1.3207  | 0.528 | 0.547 | 5.32E-33 | Plasma cel PAXX     |
| 4420 RPL27.1   | 3.65E-37 | -0.4444  | 0.984 | 0.952 | 6.86E-33 | Plasma cel RPL27    |
| 4421 RPS10.1   | 6.56E-37 | -1.09357 | 0.844 | 0.666 | 1.23E-32 | Plasma cel RPS10    |
| 4422 CISD3     | 7.26E-37 | -0.2716  | 0.475 | 0.182 | 1.36E-32 | Plasma cel CISD3    |
| 4423 HLA-B.1   | 7.61E-37 | -0.47874 | 0.996 | 0.992 | 1.43E-32 | Plasma cel HLA-B    |
| 4424 IAH1.1    | 1.19E-36 | -0.25694 | 0.599 | 0.234 | 2.23E-32 | Plasma cel IAH1     |

|      |           |          |          |       |       |          |                        |
|------|-----------|----------|----------|-------|-------|----------|------------------------|
| 4425 | MED4      | 1.27E-36 | -0.25435 | 0.624 | 0.244 | 2.38E-32 | Plasma cel MED4        |
| 4426 | SAT2.1    | 5.80E-36 | -0.29551 | 0.668 | 0.264 | 1.09E-31 | Plasma cel SAT2        |
| 4427 | MSRB1.1   | 6.22E-36 | -0.26629 | 0.314 | 0.111 | 1.17E-31 | Plasma cel MSRB1       |
| 4428 | RPS29.2   | 7.03E-36 | -0.86477 | 0.972 | 0.829 | 1.32E-31 | Plasma cel RPS29       |
| 4429 | LAT.2     | 1.18E-35 | -1.41382 | 0.262 | 0.427 | 2.22E-31 | Plasma cel LAT         |
| 4430 | ATP6V0E1. | 1.23E-35 | -0.77506 | 0.911 | 0.688 | 2.32E-31 | Plasma cel ATP6V0E1    |
| 4431 | ISCA2     | 1.49E-35 | -0.26346 | 0.601 | 0.236 | 2.80E-31 | Plasma cel ISCA2       |
| 4432 | PLAC8.1   | 2.31E-35 | -1.36982 | 0.436 | 0.513 | 4.33E-31 | Plasma cel PLAC8       |
| 4433 | PSMG4.1   | 3.11E-35 | -0.26702 | 0.504 | 0.197 | 5.84E-31 | Plasma cel PSMG4       |
| 4434 | HPS1      | 3.51E-35 | -0.26087 | 0.645 | 0.256 | 6.59E-31 | Plasma cel HPS1        |
| 4435 | SKAP1.2   | 5.14E-35 | -1.11702 | 0.165 | 0.366 | 9.65E-31 | Plasma cel SKAP1       |
| 4436 | DR1       | 6.55E-35 | -0.26047 | 0.468 | 0.182 | 1.23E-30 | Plasma cel DR1         |
| 4437 | MTERF4.1  | 8.69E-35 | -0.2655  | 0.491 | 0.192 | 1.63E-30 | Plasma cel MTERF4      |
| 4438 | TMEM134   | 9.11E-35 | -0.28895 | 0.592 | 0.235 | 1.71E-30 | Plasma cel TMEM134     |
| 4439 | PRKCH.2   | 1.22E-34 | -0.88814 | 0.032 | 0.252 | 2.30E-30 | Plasma cel PRKCH       |
| 4440 | ABLIM1.2  | 1.37E-34 | -0.9273  | 0.057 | 0.277 | 2.57E-30 | Plasma cel ABLIM1      |
| 4441 | COX8A.1   | 1.56E-34 | 0.356385 | 0.957 | 0.609 | 2.93E-30 | Plasma cel COX8A       |
| 4442 | APRT.1    | 1.69E-34 | -0.67323 | 0.931 | 0.745 | 3.17E-30 | Plasma cel APRT        |
| 4443 | GNPTG     | 1.95E-34 | -0.28498 | 0.601 | 0.238 | 3.66E-30 | Plasma cel GNPTG       |
| 4444 | HSPA8.2   | 2.01E-34 | -0.58295 | 0.94  | 0.865 | 3.77E-30 | Plasma cel HSPA8       |
| 4445 | TMA7      | 2.15E-34 | -0.47749 | 0.982 | 0.926 | 4.04E-30 | Plasma cel TMA7        |
| 4446 | C4orf48.1 | 3.56E-34 | -0.29468 | 0.727 | 0.295 | 6.70E-30 | Plasma cel C4orf48     |
| 4447 | COX6B1.1  | 4.16E-34 | 0.357542 | 0.984 | 0.812 | 7.81E-30 | Plasma cel COX6B1      |
| 4448 | EIF3L.2   | 4.45E-34 | -0.761   | 0.887 | 0.69  | 8.36E-30 | Plasma cel EIF3L       |
| 4449 | RAB24.1   | 6.07E-34 | -0.2748  | 0.652 | 0.265 | 1.14E-29 | Plasma cel RAB24       |
| 4450 | CNIH4.1   | 7.56E-34 | -0.25946 | 0.465 | 0.182 | 1.42E-29 | Plasma cel CNIH4       |
| 4451 | OSER1     | 9.34E-34 | -0.27361 | 0.457 | 0.178 | 1.76E-29 | Plasma cel OSER1       |
| 4452 | SHOC2.1   | 1.08E-33 | -0.25915 | 0.441 | 0.172 | 2.04E-29 | Plasma cel SHOC2       |
| 4453 | TROVE2    | 1.20E-33 | -0.25292 | 0.493 | 0.195 | 2.25E-29 | Plasma cel TROVE2      |
| 4454 | THUMPD3.  | 1.31E-33 | -0.30546 | 0.489 | 0.193 | 2.45E-29 | Plasma cel THUMPD3-AS1 |
| 4455 | RNMT      | 1.60E-33 | -0.28041 | 0.482 | 0.19  | 3.00E-29 | Plasma cel RNMT        |
| 4456 | IGLV2-14  | 1.65E-33 | 5.106617 | 0.144 | 0.041 | 3.10E-29 | Plasma cel IGLV2-14    |
| 4457 | ZNF106.1  | 1.88E-33 | -0.25848 | 0.434 | 0.169 | 3.53E-29 | Plasma cel ZNF106      |
| 4458 | IDH3B     | 1.89E-33 | -0.2723  | 0.534 | 0.212 | 3.55E-29 | Plasma cel IDH3B       |
| 4459 | CTNNB1    | 2.31E-33 | -0.25484 | 0.394 | 0.151 | 4.34E-29 | Plasma cel CTNNB1      |
| 4460 | WDR74.1   | 2.45E-33 | -0.26894 | 0.537 | 0.215 | 4.60E-29 | Plasma cel WDR74       |
| 4461 | UQCRFS1   | 2.58E-33 | 0.266323 | 0.92  | 0.473 | 4.84E-29 | Plasma cel UQCRFS1     |
| 4462 | CPNE3     | 3.20E-33 | -0.27721 | 0.56  | 0.224 | 6.02E-29 | Plasma cel CPNE3       |
| 4463 | ASAH1.1   | 4.18E-33 | -0.31872 | 0.716 | 0.289 | 7.86E-29 | Plasma cel ASAH1       |
| 4464 | EEF1G.1   | 4.62E-33 | -0.26068 | 0.514 | 0.207 | 8.67E-29 | Plasma cel EEF1G       |
| 4465 | METTL23.1 | 4.74E-33 | -0.27437 | 0.647 | 0.26  | 8.90E-29 | Plasma cel METTL23     |
| 4466 | PCIF1     | 5.32E-33 | -0.30048 | 0.539 | 0.215 | 9.99E-29 | Plasma cel PCIF1       |
| 4467 | ZAP70.2   | 5.36E-33 | -1.23677 | 0.195 | 0.377 | 1.01E-28 | Plasma cel ZAP70       |
| 4468 | SATB1.1   | 5.53E-33 | -0.87221 | 0.035 | 0.248 | 1.04E-28 | Plasma cel SATB1       |
| 4469 | ANAPC16.  | 6.97E-33 | -0.81658 | 0.908 | 0.676 | 1.31E-28 | Plasma cel ANAPC16     |
| 4470 | GHITM     | 8.04E-33 | 0.290776 | 0.913 | 0.5   | 1.51E-28 | Plasma cel GHITM       |
| 4471 | FBXL15    | 1.39E-32 | -0.27969 | 0.45  | 0.178 | 2.60E-28 | Plasma cel FBXL15      |

|      |            |          |          |       |       |          |            |          |
|------|------------|----------|----------|-------|-------|----------|------------|----------|
| 4472 | LYSMD2     | 2.21E-32 | -0.79555 | 0.048 | 0.258 | 4.14E-28 | Plasma cel | LYSMD2   |
| 4473 | RAB9A      | 2.63E-32 | -0.25551 | 0.383 | 0.148 | 4.94E-28 | Plasma cel | RAB9A    |
| 4474 | GIMAP1     | 2.99E-32 | -0.79604 | 0.023 | 0.23  | 5.62E-28 | Plasma cel | GIMAP1   |
| 4475 | LCP2       | 3.59E-32 | -1.07972 | 0.172 | 0.358 | 6.75E-28 | Plasma cel | LCP2     |
| 4476 | NUDT16L1   | 3.88E-32 | -0.2862  | 0.484 | 0.193 | 7.30E-28 | Plasma cel | NUDT16L1 |
| 4477 | ATP5MF.1   | 5.77E-32 | 0.350737 | 0.961 | 0.632 | 1.08E-27 | Plasma cel | ATP5MF   |
| 4478 | TRAT1.2    | 6.10E-32 | -0.91654 | 0.03  | 0.237 | 1.15E-27 | Plasma cel | TRAT1    |
| 4479 | CD5.2      | 6.23E-32 | -0.82465 | 0.03  | 0.236 | 1.17E-27 | Plasma cel | CD5      |
| 4480 | FMNL1.1    | 6.63E-32 | -0.27892 | 0.461 | 0.184 | 1.25E-27 | Plasma cel | FMNL1    |
| 4481 | ARHGEF1.2  | 8.30E-32 | -1.21223 | 0.606 | 0.555 | 1.56E-27 | Plasma cel | ARHGEF1  |
| 4482 | C1orf123   | 8.92E-32 | -0.27191 | 0.454 | 0.181 | 1.68E-27 | Plasma cel | C1orf123 |
| 4483 | XPA        | 1.02E-31 | -0.25223 | 0.424 | 0.168 | 1.91E-27 | Plasma cel | XPA      |
| 4484 | CNN2.2     | 1.18E-31 | -0.87124 | 0.816 | 0.68  | 2.21E-27 | Plasma cel | CNN2     |
| 4485 | TAOK3      | 1.41E-31 | -0.28875 | 0.573 | 0.233 | 2.65E-27 | Plasma cel | TAOK3    |
| 4486 | PLSCR1.1   | 1.61E-31 | -0.28055 | 0.413 | 0.164 | 3.03E-27 | Plasma cel | PLSCR1   |
| 4487 | CD6.2      | 1.69E-31 | -0.77375 | 0.016 | 0.218 | 3.17E-27 | Plasma cel | CD6      |
| 4488 | CHTF8.1    | 1.80E-31 | -0.28412 | 0.534 | 0.216 | 3.39E-27 | Plasma cel | CHTF8    |
| 4489 | ANKRD10.1  | 1.88E-31 | -0.30378 | 0.615 | 0.251 | 3.53E-27 | Plasma cel | ANKRD10  |
| 4490 | HCST.1     | 3.95E-31 | -1.53663 | 0.791 | 0.626 | 7.43E-27 | Plasma cel | HCST     |
| 4491 | MTMR14.1   | 5.32E-31 | -0.27134 | 0.566 | 0.231 | 9.99E-27 | Plasma cel | MTMR14   |
| 4492 | TRAF3IP3.2 | 6.87E-31 | -0.95359 | 0.835 | 0.658 | 1.29E-26 | Plasma cel | TRAF3IP3 |
| 4493 | INPP5K     | 7.23E-31 | -0.26005 | 0.397 | 0.156 | 1.36E-26 | Plasma cel | INPP5K   |
| 4494 | IP6K2.2    | 7.74E-31 | -0.29415 | 0.466 | 0.188 | 1.45E-26 | Plasma cel | IP6K2    |
| 4495 | ATP6V1B2.1 | 1.00E-30 | -0.27792 | 0.402 | 0.159 | 1.88E-26 | Plasma cel | ATP6V1B2 |
| 4496 | ELOVL1     | 1.40E-30 | -0.28032 | 0.47  | 0.19  | 2.63E-26 | Plasma cel | ELOVL1   |
| 4497 | NFE2L2     | 1.66E-30 | -0.2643  | 0.473 | 0.193 | 3.11E-26 | Plasma cel | NFE2L2   |
| 4498 | UBC.1      | 2.11E-30 | -0.58438 | 0.973 | 0.85  | 3.97E-26 | Plasma cel | UBC      |
| 4499 | ARF1       | 2.23E-30 | 0.303796 | 0.954 | 0.622 | 4.18E-26 | Plasma cel | ARF1     |
| 4500 | CSNK1D     | 3.10E-30 | -0.26732 | 0.411 | 0.164 | 5.82E-26 | Plasma cel | CSNK1D   |
| 4501 | ARL16      | 4.05E-30 | -0.29655 | 0.484 | 0.197 | 7.60E-26 | Plasma cel | ARL16    |
| 4502 | YTHDC1     | 4.55E-30 | -0.2906  | 0.551 | 0.227 | 8.54E-26 | Plasma cel | YTHDC1   |
| 4503 | RIPOR2.1   | 5.64E-30 | -1.07368 | 0.69  | 0.595 | 1.06E-25 | Plasma cel | RIPOR2   |
| 4504 | ITK.2      | 5.78E-30 | -0.79412 | 0.025 | 0.22  | 1.08E-25 | Plasma cel | ITK      |
| 4505 | CHD2.1     | 6.39E-30 | -0.31318 | 0.537 | 0.221 | 1.20E-25 | Plasma cel | CHD2     |
| 4506 | SYNE2.2    | 1.10E-29 | -0.33067 | 0.427 | 0.173 | 2.06E-25 | Plasma cel | SYNE2    |
| 4507 | MYCBP2     | 1.45E-29 | -0.27205 | 0.608 | 0.253 | 2.73E-25 | Plasma cel | MYCBP2   |
| 4508 | CALM2.2    | 1.47E-29 | -0.57061 | 0.924 | 0.806 | 2.76E-25 | Plasma cel | CALM2    |
| 4509 | TPI1.2     | 1.54E-29 | 0.497022 | 0.949 | 0.616 | 2.90E-25 | Plasma cel | TPI1     |
| 4510 | RNASET2.1  | 1.72E-29 | -1.10206 | 0.699 | 0.6   | 3.23E-25 | Plasma cel | RNASET2  |
| 4511 | TC2N.1     | 2.19E-29 | -0.79687 | 0.027 | 0.219 | 4.11E-25 | Plasma cel | TC2N     |
| 4512 | TSPAN3.2   | 2.34E-29 | -0.3889  | 0.496 | 0.204 | 4.39E-25 | Plasma cel | TSPAN3   |
| 4513 | ORMDL3.1   | 2.54E-29 | -0.26418 | 0.378 | 0.15  | 4.78E-25 | Plasma cel | ORMDL3   |
| 4514 | GRHPR      | 2.86E-29 | -0.27151 | 0.434 | 0.176 | 5.38E-25 | Plasma cel | GRHPR    |
| 4515 | PLEK.1     | 3.74E-29 | -0.6432  | 0.56  | 0.231 | 7.03E-25 | Plasma cel | PLEK     |
| 4516 | DENR       | 4.08E-29 | -0.25504 | 0.589 | 0.245 | 7.67E-25 | Plasma cel | DENR     |
| 4517 | USP4       | 4.18E-29 | -0.27134 | 0.422 | 0.171 | 7.85E-25 | Plasma cel | USP4     |
| 4518 | GYPC.2     | 4.47E-29 | -0.89013 | 0.902 | 0.67  | 8.40E-25 | Plasma cel | GYPC     |

|      |            |          |          |       |       |          |                     |
|------|------------|----------|----------|-------|-------|----------|---------------------|
| 4519 | NORAD.1    | 6.34E-29 | -0.27298 | 0.378 | 0.151 | 1.19E-24 | Plasma cel NORAD    |
| 4520 | IGHG2      | 6.95E-29 | 2.591094 | 0.165 | 0.057 | 1.31E-24 | Plasma cel IGHG2    |
| 4521 | PHYKPL     | 8.70E-29 | -0.28599 | 0.514 | 0.214 | 1.64E-24 | Plasma cel PHYKPL   |
| 4522 | SLC38A1.1  | 1.01E-28 | -0.29268 | 0.695 | 0.29  | 1.89E-24 | Plasma cel SLC38A1  |
| 4523 | ST13.2     | 1.13E-28 | -0.92464 | 0.824 | 0.626 | 2.12E-24 | Plasma cel ST13     |
| 4524 | NBDY.2     | 1.23E-28 | -0.33353 | 0.569 | 0.236 | 2.32E-24 | Plasma cel NBDY     |
| 4525 | EIF3E.2    | 1.36E-28 | -0.79858 | 0.894 | 0.677 | 2.55E-24 | Plasma cel EIF3E    |
| 4526 | TMEM59     | 1.91E-28 | 0.254597 | 0.949 | 0.552 | 3.59E-24 | Plasma cel TMEM59   |
| 4527 | CUTA.1     | 1.96E-28 | 0.266453 | 0.966 | 0.586 | 3.68E-24 | Plasma cel CUTA     |
| 4528 | ZFAS1.1    | 2.13E-28 | -1.07656 | 0.695 | 0.582 | 3.99E-24 | Plasma cel ZFAS1    |
| 4529 | SEPT9.2    | 2.45E-28 | -1.03953 | 0.704 | 0.582 | 4.60E-24 | Plasma cel Sep-09   |
| 4530 | COX7C.1    | 2.59E-28 | -0.4472  | 0.975 | 0.892 | 4.87E-24 | Plasma cel COX7C    |
| 4531 | SNU13.1    | 2.61E-28 | 0.264402 | 0.952 | 0.548 | 4.91E-24 | Plasma cel SNU13    |
| 4532 | CTSW.2     | 2.70E-28 | -1.88007 | 0.066 | 0.256 | 5.08E-24 | Plasma cel CTSW     |
| 4533 | WAPL       | 3.03E-28 | -0.25625 | 0.433 | 0.178 | 5.69E-24 | Plasma cel WAPL     |
| 4534 | SMU1       | 3.46E-28 | -0.28009 | 0.5   | 0.208 | 6.50E-24 | Plasma cel SMU1     |
| 4535 | CHMP5.1    | 4.06E-28 | -0.29882 | 0.537 | 0.224 | 7.64E-24 | Plasma cel CHMP5    |
| 4536 | RBM23      | 4.23E-28 | -0.26191 | 0.392 | 0.159 | 7.95E-24 | Plasma cel RBM23    |
| 4537 | ARFGAP2    | 4.28E-28 | -0.29411 | 0.45  | 0.185 | 8.05E-24 | Plasma cel ARFGAP2  |
| 4538 | PRPF8      | 5.07E-28 | -0.29498 | 0.557 | 0.234 | 9.53E-24 | Plasma cel PRPF8    |
| 4539 | HVCN1.2    | 5.49E-28 | -1.32611 | 0.099 | 0.286 | 1.03E-23 | Plasma cel HVCN1    |
| 4540 | UGP2       | 8.44E-28 | -0.31167 | 0.564 | 0.236 | 1.58E-23 | Plasma cel UGP2     |
| 4541 | ANXA2R.2   | 9.77E-28 | -0.8757  | 0.083 | 0.269 | 1.84E-23 | Plasma cel ANXA2R   |
| 4542 | RGS10.1    | 1.03E-27 | -1.35864 | 0.573 | 0.531 | 1.94E-23 | Plasma cel RGS10    |
| 4543 | THYN1.1    | 1.10E-27 | -0.2657  | 0.631 | 0.265 | 2.06E-23 | Plasma cel THYN1    |
| 4544 | HSF1       | 1.11E-27 | -0.27813 | 0.599 | 0.252 | 2.08E-23 | Plasma cel HSF1     |
| 4545 | ADAM10.1   | 1.16E-27 | -0.26491 | 0.433 | 0.179 | 2.17E-23 | Plasma cel ADAM10   |
| 4546 | TBCC.1     | 1.44E-27 | -0.26344 | 0.392 | 0.16  | 2.70E-23 | Plasma cel TBCC     |
| 4547 | MT-ATP6.1  | 1.44E-27 | -0.35142 | 0.998 | 0.993 | 2.70E-23 | Plasma cel MT-ATP6  |
| 4548 | PPP4R3B    | 2.02E-27 | -0.29586 | 0.443 | 0.184 | 3.80E-23 | Plasma cel PPP4R3B  |
| 4549 | TINF2.1    | 2.03E-27 | -0.32988 | 0.622 | 0.261 | 3.81E-23 | Plasma cel TINF2    |
| 4550 | DEGS1.1    | 2.10E-27 | -0.30784 | 0.512 | 0.216 | 3.94E-23 | Plasma cel DEGS1    |
| 4551 | CD8B.2     | 2.97E-27 | -1.71159 | 0.025 | 0.206 | 5.58E-23 | Plasma cel CD8B     |
| 4552 | TEX264     | 3.55E-27 | -0.26353 | 0.67  | 0.283 | 6.66E-23 | Plasma cel TEX264   |
| 4553 | CD300A.1   | 3.78E-27 | -0.37318 | 0.355 | 0.143 | 7.10E-23 | Plasma cel CD300A   |
| 4554 | S100A6.2   | 5.11E-27 | -1.57572 | 0.782 | 0.751 | 9.60E-23 | Plasma cel S100A6   |
| 4555 | C20orf27.1 | 6.08E-27 | -0.25943 | 0.495 | 0.21  | 1.14E-22 | Plasma cel C20orf27 |
| 4556 | PRMT2.2    | 7.20E-27 | -1.27196 | 0.592 | 0.534 | 1.35E-22 | Plasma cel PRMT2    |
| 4557 | MPPE1      | 7.42E-27 | -0.25295 | 0.349 | 0.141 | 1.39E-22 | Plasma cel MPPE1    |
| 4558 | ZNF638     | 8.60E-27 | -0.30374 | 0.433 | 0.18  | 1.62E-22 | Plasma cel ZNF638   |
| 4559 | PRKAR1A.1  | 1.02E-26 | -0.30678 | 0.739 | 0.312 | 1.92E-22 | Plasma cel PRKAR1A  |
| 4560 | VPS35.1    | 1.09E-26 | -0.27972 | 0.665 | 0.282 | 2.04E-22 | Plasma cel VPS35    |
| 4561 | TMX4       | 1.22E-26 | -0.25573 | 0.383 | 0.158 | 2.29E-22 | Plasma cel TMX4     |
| 4562 | CD96.2     | 1.28E-26 | -0.67595 | 0.02  | 0.196 | 2.41E-22 | Plasma cel CD96     |
| 4563 | SYPL1.2    | 1.31E-26 | -1.13377 | 0.222 | 0.367 | 2.46E-22 | Plasma cel SYPL1    |
| 4564 | C16orf54   | 1.40E-26 | -0.25128 | 0.404 | 0.168 | 2.62E-22 | Plasma cel C16orf54 |
| 4565 | MS4A1.2    | 1.69E-26 | -2.36835 | 0.094 | 0.274 | 3.17E-22 | Plasma cel MS4A1    |

|      |           |          |          |       |       |          |                      |
|------|-----------|----------|----------|-------|-------|----------|----------------------|
| 4566 | ACAA1.1   | 1.77E-26 | -0.29625 | 0.661 | 0.28  | 3.32E-22 | Plasma cel ACAA1     |
| 4567 | EFHD2.1   | 2.19E-26 | -0.38601 | 0.362 | 0.148 | 4.11E-22 | Plasma cel EFHD2     |
| 4568 | RPL36A.2  | 2.39E-26 | -0.71501 | 0.956 | 0.802 | 4.49E-22 | Plasma cel RPL36A    |
| 4569 | LCP1.1    | 2.75E-26 | -1.13202 | 0.688 | 0.583 | 5.17E-22 | Plasma cel LCP1      |
| 4570 | JUNB.2    | 2.76E-26 | -1.52802 | 0.661 | 0.571 | 5.19E-22 | Plasma cel JUNB      |
| 4571 | NDUFA4.1  | 3.32E-26 | 0.297796 | 0.979 | 0.713 | 6.24E-22 | Plasma cel NDUFA4    |
| 4572 | SOD1.1    | 3.43E-26 | -0.66928 | 0.902 | 0.694 | 6.45E-22 | Plasma cel SOD1      |
| 4573 | TMEM175   | 3.74E-26 | -0.28882 | 0.402 | 0.168 | 7.02E-22 | Plasma cel TMEM175   |
| 4574 | LPXN.1    | 4.07E-26 | -0.27128 | 0.493 | 0.209 | 7.65E-22 | Plasma cel LPXN      |
| 4575 | ELP2.1    | 5.05E-26 | -0.2508  | 0.351 | 0.143 | 9.48E-22 | Plasma cel ELP2      |
| 4576 | AKIRIN1   | 6.12E-26 | -0.32566 | 0.486 | 0.206 | 1.15E-21 | Plasma cel AKIRIN1   |
| 4577 | SORL1.1   | 8.62E-26 | -0.69079 | 0.021 | 0.194 | 1.62E-21 | Plasma cel SORL1     |
| 4578 | CFDP1.1   | 9.18E-26 | -0.30962 | 0.493 | 0.21  | 1.72E-21 | Plasma cel CFDP1     |
| 4579 | DGKA.2    | 9.98E-26 | -0.98607 | 0.161 | 0.323 | 1.88E-21 | Plasma cel DGKA      |
| 4580 | SIGIRR.1  | 1.09E-25 | -1.06898 | 0.284 | 0.399 | 2.04E-21 | Plasma cel SIGIRR    |
| 4581 | TMEM109   | 1.18E-25 | -0.27113 | 0.58  | 0.249 | 2.21E-21 | Plasma cel TMEM109   |
| 4582 | IRAK4     | 1.20E-25 | -0.26568 | 0.395 | 0.165 | 2.25E-21 | Plasma cel IRAK4     |
| 4583 | DNAJC19.1 | 1.36E-25 | -0.25631 | 0.67  | 0.287 | 2.55E-21 | Plasma cel DNAJC19   |
| 4584 | SIRPG.2   | 1.44E-25 | -0.64511 | 0.009 | 0.176 | 2.71E-21 | Plasma cel SIRPG     |
| 4585 | HMGNA4.1  | 1.72E-25 | -0.32654 | 0.654 | 0.279 | 3.23E-21 | Plasma cel HMGNA4    |
| 4586 | CNOT2     | 1.87E-25 | -0.32853 | 0.589 | 0.251 | 3.50E-21 | Plasma cel CNOT2     |
| 4587 | ZNF292    | 2.33E-25 | -0.27713 | 0.417 | 0.176 | 4.38E-21 | Plasma cel ZNF292    |
| 4588 | PEX16     | 2.61E-25 | -0.30092 | 0.454 | 0.193 | 4.90E-21 | Plasma cel PEX16     |
| 4589 | ITGB2-AS1 | 2.68E-25 | -0.82527 | 0.08  | 0.254 | 5.03E-21 | Plasma cel ITGB2-AS1 |
| 4590 | CAMK4.2   | 2.73E-25 | -1.04514 | 0.149 | 0.312 | 5.14E-21 | Plasma cel CAMK4     |
| 4591 | RPL7.2    | 2.88E-25 | -0.45697 | 0.965 | 0.866 | 5.41E-21 | Plasma cel RPL7      |
| 4592 | HLA-DQA2  | 4.06E-25 | -1.13225 | 0.491 | 0.211 | 7.63E-21 | Plasma cel HLA-DQA2  |
| 4593 | RSF1      | 4.34E-25 | -0.31454 | 0.507 | 0.218 | 8.16E-21 | Plasma cel RSF1      |
| 4594 | CEBPZOS   | 4.46E-25 | -0.25793 | 0.395 | 0.167 | 8.38E-21 | Plasma cel CEBPZOS   |
| 4595 | IGHM.1    | 4.56E-25 | 3.415189 | 0.445 | 0.257 | 8.57E-21 | Plasma cel IGHM      |
| 4596 | RSBN1L    | 4.66E-25 | -0.35948 | 0.574 | 0.247 | 8.75E-21 | Plasma cel RSBN1L    |
| 4597 | TRA2A     | 4.69E-25 | -0.27838 | 0.441 | 0.189 | 8.81E-21 | Plasma cel TRA2A     |
| 4598 | SCML4.1   | 5.30E-25 | -0.63467 | 0.016 | 0.182 | 9.96E-21 | Plasma cel SCML4     |
| 4599 | TSR2.1    | 5.70E-25 | -0.27591 | 0.436 | 0.186 | 1.07E-20 | Plasma cel TSR2      |
| 4600 | C14orf119 | 6.15E-25 | -0.30603 | 0.626 | 0.269 | 1.15E-20 | Plasma cel C14orf119 |
| 4601 | THEM4.1   | 6.30E-25 | -0.27897 | 0.388 | 0.164 | 1.18E-20 | Plasma cel THEM4     |
| 4602 | TMIGD2.1  | 6.80E-25 | -0.67632 | 0.023 | 0.191 | 1.28E-20 | Plasma cel TMIGD2    |
| 4603 | STX7      | 6.87E-25 | -0.48206 | 0.507 | 0.217 | 1.29E-20 | Plasma cel STX7      |
| 4604 | CISH.1    | 6.95E-25 | -1.06839 | 0.034 | 0.204 | 1.31E-20 | Plasma cel CISH      |
| 4605 | FAM162A   | 7.72E-25 | -0.26073 | 0.615 | 0.266 | 1.45E-20 | Plasma cel FAM162A   |
| 4606 | CCNG1.2   | 7.77E-25 | -0.30905 | 0.489 | 0.21  | 1.46E-20 | Plasma cel CCNG1     |
| 4607 | VIM.1     | 8.15E-25 | 0.373159 | 0.968 | 0.811 | 1.53E-20 | Plasma cel VIM       |
| 4608 | U2AF1L4.1 | 8.67E-25 | -0.28604 | 0.418 | 0.178 | 1.63E-20 | Plasma cel U2AF1L4   |
| 4609 | ARF6      | 1.00E-24 | -0.32218 | 0.461 | 0.198 | 1.88E-20 | Plasma cel ARF6      |
| 4610 | TNIP1     | 1.12E-24 | -0.33164 | 0.601 | 0.259 | 2.11E-20 | Plasma cel TNIP1     |
| 4611 | MX2.1     | 1.15E-24 | -0.61042 | 0.018 | 0.183 | 2.15E-20 | Plasma cel MX2       |
| 4612 | PPWD1.1   | 1.21E-24 | -0.25317 | 0.362 | 0.152 | 2.27E-20 | Plasma cel PPWD1     |

|      |           |          |          |       |       |          |                     |
|------|-----------|----------|----------|-------|-------|----------|---------------------|
| 4613 | IL4R.1    | 1.22E-24 | -0.82509 | 0.032 | 0.2   | 2.28E-20 | Plasma cel IL4R     |
| 4614 | PCID2.1   | 1.56E-24 | -0.28454 | 0.399 | 0.169 | 2.92E-20 | Plasma cel PCID2    |
| 4615 | NIFK.1    | 1.96E-24 | -0.27639 | 0.615 | 0.268 | 3.69E-20 | Plasma cel NIFK     |
| 4616 | CTSB.1    | 2.18E-24 | -0.49072 | 0.527 | 0.227 | 4.09E-20 | Plasma cel CTSB     |
| 4617 | ARMH1.2   | 2.21E-24 | -0.70361 | 0.028 | 0.194 | 4.16E-20 | Plasma cel ARMH1    |
| 4618 | RPL13A    | 2.42E-24 | -0.67543 | 0.934 | 0.715 | 4.55E-20 | Plasma cel RPL13A   |
| 4619 | ITFG2.1   | 2.66E-24 | -0.26629 | 0.363 | 0.153 | 4.99E-20 | Plasma cel ITFG2    |
| 4620 | ARFRP1    | 2.70E-24 | -0.29982 | 0.436 | 0.187 | 5.08E-20 | Plasma cel ARFRP1   |
| 4621 | S1PR4     | 2.72E-24 | -0.2544  | 0.574 | 0.255 | 5.11E-20 | Plasma cel S1PR4    |
| 4622 | PSAP.1    | 3.10E-24 | -0.51909 | 0.888 | 0.403 | 5.83E-20 | Plasma cel PSAP     |
| 4623 | DPF2.1    | 3.58E-24 | -0.28156 | 0.395 | 0.168 | 6.72E-20 | Plasma cel DPF2     |
| 4624 | C7orf50   | 3.94E-24 | -0.36365 | 0.491 | 0.212 | 7.41E-20 | Plasma cel C7orf50  |
| 4625 | IRF2      | 4.16E-24 | -0.28862 | 0.674 | 0.293 | 7.82E-20 | Plasma cel IRF2     |
| 4626 | SNX1      | 4.17E-24 | -0.29483 | 0.617 | 0.267 | 7.84E-20 | Plasma cel SNX1     |
| 4627 | PIAS1     | 6.07E-24 | -0.35331 | 0.514 | 0.223 | 1.14E-19 | Plasma cel PIAS1    |
| 4628 | CAPG.2    | 8.08E-24 | -0.43295 | 0.475 | 0.208 | 1.52E-19 | Plasma cel CAPG     |
| 4629 | CD8A.2    | 8.61E-24 | -1.05812 | 0.014 | 0.173 | 1.62E-19 | Plasma cel CD8A     |
| 4630 | MED30     | 8.69E-24 | -0.26333 | 0.395 | 0.169 | 1.63E-19 | Plasma cel MED30    |
| 4631 | ARPC2.2   | 9.92E-24 | -0.51986 | 0.956 | 0.859 | 1.86E-19 | Plasma cel ARPC2    |
| 4632 | RPL38.2   | 1.06E-23 | -0.57382 | 0.956 | 0.813 | 1.98E-19 | Plasma cel RPL38    |
| 4633 | REST.1    | 1.12E-23 | -0.29482 | 0.429 | 0.186 | 2.10E-19 | Plasma cel REST     |
| 4634 | SCP2      | 1.66E-23 | -0.29321 | 0.771 | 0.331 | 3.11E-19 | Plasma cel SCP2     |
| 4635 | UBLCP1.1  | 2.04E-23 | -0.32848 | 0.504 | 0.22  | 3.83E-19 | Plasma cel UBLCP1   |
| 4636 | ARHGAP9   | 2.19E-23 | -1.01004 | 0.239 | 0.363 | 4.12E-19 | Plasma cel ARHGAP9  |
| 4637 | PDE4B.1   | 2.28E-23 | -0.33245 | 0.387 | 0.166 | 4.29E-19 | Plasma cel PDE4B    |
| 4638 | SF1.1     | 2.93E-23 | -0.94482 | 0.762 | 0.589 | 5.51E-19 | Plasma cel SF1      |
| 4639 | FAM129C.1 | 3.17E-23 | -0.97668 | 0.02  | 0.177 | 5.95E-19 | Plasma cel FAM129C  |
| 4640 | REL.1     | 3.46E-23 | -0.7915  | 0.071 | 0.234 | 6.51E-19 | Plasma cel REL      |
| 4641 | IFNGR2.1  | 3.94E-23 | -0.41781 | 0.75  | 0.322 | 7.41E-19 | Plasma cel IFNGR2   |
| 4642 | PPP2R5C.1 | 4.26E-23 | -0.42809 | 0.468 | 0.204 | 8.01E-19 | Plasma cel PPP2R5C  |
| 4643 | CCDC82    | 4.86E-23 | -0.25937 | 0.332 | 0.139 | 9.13E-19 | Plasma cel CCDC82   |
| 4644 | POLE4.1   | 5.56E-23 | -0.30432 | 0.605 | 0.266 | 1.05E-18 | Plasma cel POLE4    |
| 4645 | FLT3LG.2  | 6.96E-23 | -1.2419  | 0.293 | 0.391 | 1.31E-18 | Plasma cel FLT3LG   |
| 4646 | CCNL2     | 8.05E-23 | -0.31469 | 0.397 | 0.172 | 1.51E-18 | Plasma cel CCNL2    |
| 4647 | SMARCC2   | 8.90E-23 | -0.25333 | 0.376 | 0.162 | 1.67E-18 | Plasma cel SMARCC2  |
| 4648 | KMT2C.1   | 9.67E-23 | -0.25003 | 0.346 | 0.148 | 1.82E-18 | Plasma cel KMT2C    |
| 4649 | GIMAP6.1  | 1.22E-22 | -0.59907 | 0.02  | 0.174 | 2.30E-18 | Plasma cel GIMAP6   |
| 4650 | PPM1K.1   | 1.26E-22 | -0.37675 | 0.441 | 0.193 | 2.37E-18 | Plasma cel PPM1K    |
| 4651 | NMI.2     | 1.31E-22 | -0.3002  | 0.504 | 0.222 | 2.46E-18 | Plasma cel NMI      |
| 4652 | TOR1AIP1  | 1.71E-22 | -0.27277 | 0.353 | 0.151 | 3.21E-18 | Plasma cel TOR1AIP1 |
| 4653 | ROCK1.1   | 1.73E-22 | -0.32164 | 0.544 | 0.241 | 3.25E-18 | Plasma cel ROCK1    |
| 4654 | IL16.2    | 1.88E-22 | -1.03862 | 0.596 | 0.531 | 3.52E-18 | Plasma cel IL16     |
| 4655 | TRAPPC6A  | 2.04E-22 | -0.354   | 0.638 | 0.28  | 3.83E-18 | Plasma cel TRAPPC6A |
| 4656 | CARD8     | 2.23E-22 | -0.2903  | 0.395 | 0.172 | 4.18E-18 | Plasma cel CARD8    |
| 4657 | ATF1      | 2.87E-22 | -0.2724  | 0.337 | 0.144 | 5.39E-18 | Plasma cel ATF1     |
| 4658 | SENP6     | 4.14E-22 | -0.31947 | 0.443 | 0.195 | 7.77E-18 | Plasma cel SENP6    |
| 4659 | PPT1.1    | 4.53E-22 | -0.31622 | 0.525 | 0.232 | 8.52E-18 | Plasma cel PPT1     |

|      |           |          |          |       |       |          |                      |
|------|-----------|----------|----------|-------|-------|----------|----------------------|
| 4660 | NKTR      | 4.60E-22 | -0.33039 | 0.475 | 0.21  | 8.64E-18 | Plasma cel NKTR      |
| 4661 | NUP214.1  | 4.80E-22 | -0.3298  | 0.335 | 0.144 | 9.01E-18 | Plasma cel NUP214    |
| 4662 | TMEM204   | 5.25E-22 | -0.62016 | 0.027 | 0.179 | 9.86E-18 | Plasma cel TMEM204   |
| 4663 | TNFRSF1A  | 5.40E-22 | -0.62735 | 0.034 | 0.187 | 1.01E-17 | Plasma cel TNFRSF1A  |
| 4664 | MITD1     | 5.64E-22 | -0.31737 | 0.401 | 0.175 | 1.06E-17 | Plasma cel MITD1     |
| 4665 | USP34     | 5.89E-22 | -0.26135 | 0.346 | 0.149 | 1.11E-17 | Plasma cel USP34     |
| 4666 | IQGAP1.1  | 6.03E-22 | -0.31731 | 0.654 | 0.293 | 1.13E-17 | Plasma cel IQGAP1    |
| 4667 | PDCD6IP   | 6.20E-22 | -0.31804 | 0.505 | 0.225 | 1.16E-17 | Plasma cel PDCD6IP   |
| 4668 | RNF149.1  | 7.36E-22 | -0.3769  | 0.686 | 0.304 | 1.38E-17 | Plasma cel RNF149    |
| 4669 | EIF3K     | 7.59E-22 | -0.36692 | 0.977 | 0.875 | 1.43E-17 | Plasma cel EIF3K     |
| 4670 | DHPS.1    | 9.98E-22 | -0.3191  | 0.699 | 0.307 | 1.88E-17 | Plasma cel DHPS      |
| 4671 | SUMO3     | 1.01E-21 | -0.30063 | 0.613 | 0.272 | 1.89E-17 | Plasma cel SUMO3     |
| 4672 | RASSF1    | 1.01E-21 | -0.38862 | 0.418 | 0.184 | 1.90E-17 | Plasma cel RASSF1    |
| 4673 | DEF6.1    | 1.24E-21 | -0.29364 | 0.768 | 0.336 | 2.33E-17 | Plasma cel DEF6      |
| 4674 | IK        | 1.26E-21 | -0.2529  | 0.723 | 0.322 | 2.37E-17 | Plasma cel IK        |
| 4675 | RP9.1     | 1.28E-21 | -0.30577 | 0.333 | 0.143 | 2.40E-17 | Plasma cel RP9       |
| 4676 | LINC00667 | 1.37E-21 | -0.26855 | 0.337 | 0.145 | 2.56E-17 | Plasma cel LINC00667 |
| 4677 | INO80E.1  | 1.48E-21 | -0.33551 | 0.615 | 0.272 | 2.77E-17 | Plasma cel INO80E    |
| 4678 | SRP14.1   | 1.73E-21 | -0.3753  | 0.966 | 0.88  | 3.25E-17 | Plasma cel SRP14     |
| 4679 | XAB2.1    | 2.04E-21 | -0.33603 | 0.441 | 0.195 | 3.83E-17 | Plasma cel XAB2      |
| 4680 | TYROBP.1  | 2.26E-21 | -2.64579 | 0.051 | 0.205 | 4.25E-17 | Plasma cel TYROBP    |
| 4681 | ARL2BP.1  | 2.71E-21 | -0.33067 | 0.525 | 0.234 | 5.09E-17 | Plasma cel ARL2BP    |
| 4682 | UQCRB     | 2.90E-21 | -0.51066 | 0.954 | 0.764 | 5.45E-17 | Plasma cel UQCRB     |
| 4683 | CYB5R3    | 3.19E-21 | -0.35996 | 0.534 | 0.238 | 5.99E-17 | Plasma cel CYB5R3    |
| 4684 | MIER1     | 3.85E-21 | -0.32563 | 0.42  | 0.186 | 7.23E-17 | Plasma cel MIER1     |
| 4685 | RIN3.1    | 4.08E-21 | -0.67438 | 0.069 | 0.222 | 7.67E-17 | Plasma cel RIN3      |
| 4686 | GON4L     | 4.09E-21 | -0.29046 | 0.374 | 0.165 | 7.69E-17 | Plasma cel GON4L     |
| 4687 | TUBA1B.2  | 4.21E-21 | 1.358041 | 0.723 | 0.515 | 7.91E-17 | Plasma cel TUBA1B    |
| 4688 | DCP2.1    | 4.51E-21 | -0.28572 | 0.399 | 0.177 | 8.47E-17 | Plasma cel DCP2      |
| 4689 | RNASEH2B  | 4.70E-21 | -0.27572 | 0.699 | 0.313 | 8.82E-17 | Plasma cel RNASEH2B  |
| 4690 | NEMF      | 5.18E-21 | -0.32947 | 0.461 | 0.206 | 9.73E-17 | Plasma cel NEMF      |
| 4691 | CSNK1A1   | 5.27E-21 | -0.29476 | 0.713 | 0.315 | 9.90E-17 | Plasma cel CSNK1A1   |
| 4692 | LAMTOR4   | 5.58E-21 | -0.90384 | 0.844 | 0.601 | 1.05E-16 | Plasma cel LAMTOR4   |
| 4693 | PRPF38B   | 6.27E-21 | -0.35456 | 0.613 | 0.275 | 1.18E-16 | Plasma cel PRPF38B   |
| 4694 | PRKCB.1   | 6.74E-21 | -0.30254 | 0.42  | 0.19  | 1.27E-16 | Plasma cel PRKCB     |
| 4695 | CCDC12    | 7.03E-21 | -0.36074 | 0.647 | 0.287 | 1.32E-16 | Plasma cel CCDC12    |
| 4696 | CNOT4     | 7.32E-21 | -0.25882 | 0.326 | 0.141 | 1.37E-16 | Plasma cel CNOT4     |
| 4697 | SLC25A5   | 8.37E-21 | 0.418526 | 0.957 | 0.699 | 1.57E-16 | Plasma cel SLC25A5   |
| 4698 | TIAL1.1   | 8.80E-21 | -0.28321 | 0.649 | 0.291 | 1.65E-16 | Plasma cel TIAL1     |
| 4699 | CAP1.2    | 9.68E-21 | -0.90933 | 0.759 | 0.579 | 1.82E-16 | Plasma cel CAP1      |
| 4700 | WIPF1     | 1.13E-20 | -0.31875 | 0.656 | 0.293 | 2.13E-16 | Plasma cel WIPF1     |
| 4701 | GIMAP5.2  | 1.18E-20 | -0.56441 | 0.016 | 0.157 | 2.21E-16 | Plasma cel GIMAP5    |
| 4702 | VAMP5.1   | 1.23E-20 | -0.40398 | 0.651 | 0.293 | 2.31E-16 | Plasma cel VAMP5     |
| 4703 | C1QBP.1   | 1.36E-20 | 0.279579 | 0.913 | 0.559 | 2.55E-16 | Plasma cel C1QBP     |
| 4704 | LST1.2    | 1.41E-20 | -1.61979 | 0.027 | 0.172 | 2.65E-16 | Plasma cel LST1      |
| 4705 | FYN       | 1.89E-20 | -0.60239 | 0.021 | 0.163 | 3.55E-16 | Plasma cel FYN       |
| 4706 | UBAC2.1   | 1.89E-20 | -0.83305 | 0.163 | 0.299 | 3.56E-16 | Plasma cel UBAC2     |



|      |           |          |          |       |       |          |                      |
|------|-----------|----------|----------|-------|-------|----------|----------------------|
| 4707 | SLFN5.2   | 1.97E-20 | -0.84454 | 0.113 | 0.259 | 3.70E-16 | Plasma cel SLFN5     |
| 4708 | CCDC91    | 1.98E-20 | -0.25887 | 0.321 | 0.139 | 3.72E-16 | Plasma cel CCDC91    |
| 4709 | DGKD      | 2.03E-20 | -0.29172 | 0.328 | 0.143 | 3.81E-16 | Plasma cel DGKD      |
| 4710 | CMPK1.1   | 2.19E-20 | -0.31393 | 0.707 | 0.314 | 4.11E-16 | Plasma cel CMPK1     |
| 4711 | HLA-DMB   | 2.19E-20 | -0.8691  | 0.053 | 0.2   | 4.11E-16 | Plasma cel HLA-DMB   |
| 4712 | HNRNPA2B1 | 2.45E-20 | -0.37236 | 0.961 | 0.882 | 4.60E-16 | Plasma cel HNRNPA2B1 |
| 4713 | MAML2.2   | 2.58E-20 | -0.57793 | 0.021 | 0.162 | 4.85E-16 | Plasma cel MAML2     |
| 4714 | DGCR6L    | 3.25E-20 | -0.35948 | 0.566 | 0.254 | 6.10E-16 | Plasma cel DGCR6L    |
| 4715 | ZMAT2     | 3.49E-20 | -0.32806 | 0.622 | 0.279 | 6.55E-16 | Plasma cel ZMAT2     |
| 4716 | MT1X      | 3.76E-20 | -0.35422 | 0.461 | 0.208 | 7.07E-16 | Plasma cel MT1X      |
| 4717 | HMGB1.2   | 3.76E-20 | 0.637389 | 0.975 | 0.812 | 7.07E-16 | Plasma cel HMGB1     |
| 4718 | ESYT1.1   | 4.60E-20 | -0.34739 | 0.463 | 0.209 | 8.63E-16 | Plasma cel ESYT1     |
| 4719 | JAML.1    | 5.40E-20 | -0.65938 | 0.034 | 0.176 | 1.01E-15 | Plasma cel JAML      |
| 4720 | GIMAP2.1  | 5.72E-20 | -0.77934 | 0.103 | 0.247 | 1.07E-15 | Plasma cel GIMAP2    |
| 4721 | EFR3A     | 5.83E-20 | -0.25934 | 0.324 | 0.143 | 1.10E-15 | Plasma cel EFR3A     |
| 4722 | TCL1A.2   | 6.03E-20 | -2.06953 | 0.062 | 0.208 | 1.13E-15 | Plasma cel TCL1A     |
| 4723 | PDLIM2    | 6.33E-20 | -0.75125 | 0.117 | 0.259 | 1.19E-15 | Plasma cel PDLIM2    |
| 4724 | STAG2     | 7.08E-20 | -0.33026 | 0.457 | 0.207 | 1.33E-15 | Plasma cel STAG2     |
| 4725 | PYCARD.1  | 7.18E-20 | -0.54433 | 0.817 | 0.361 | 1.35E-15 | Plasma cel PYCARD    |
| 4726 | CD4.1     | 7.41E-20 | -0.55286 | 0.018 | 0.155 | 1.39E-15 | Plasma cel CD4       |
| 4727 | HBP1      | 8.81E-20 | -0.28587 | 0.48  | 0.22  | 1.66E-15 | Plasma cel HBP1      |
| 4728 | DOCK8.1   | 9.15E-20 | -0.31468 | 0.706 | 0.318 | 1.72E-15 | Plasma cel DOCK8     |
| 4729 | GSTO1.2   | 9.77E-20 | -0.40113 | 0.635 | 0.286 | 1.84E-15 | Plasma cel GSTO1     |
| 4730 | ADAM8     | 9.80E-20 | -0.2823  | 0.305 | 0.134 | 1.84E-15 | Plasma cel ADAM8     |
| 4731 | SNHG15    | 1.04E-19 | -0.2789  | 0.427 | 0.195 | 1.96E-15 | Plasma cel SNHG15    |
| 4732 | NCOA4.2   | 1.08E-19 | -0.39842 | 0.571 | 0.258 | 2.02E-15 | Plasma cel NCOA4     |
| 4733 | TXK.2     | 1.22E-19 | -0.59048 | 0.027 | 0.165 | 2.29E-15 | Plasma cel TXK       |
| 4734 | NCK1      | 1.24E-19 | -0.29164 | 0.358 | 0.16  | 2.33E-15 | Plasma cel NCK1      |
| 4735 | MAP4K2    | 1.71E-19 | -0.28329 | 0.353 | 0.158 | 3.21E-15 | Plasma cel MAP4K2    |
| 4736 | OSGEP     | 1.74E-19 | -0.32644 | 0.44  | 0.2   | 3.27E-15 | Plasma cel OSGEP     |
| 4737 | ABI1      | 1.91E-19 | -0.35247 | 0.521 | 0.238 | 3.58E-15 | Plasma cel ABI1      |
| 4738 | DNAJA2    | 1.97E-19 | -0.32513 | 0.67  | 0.301 | 3.70E-15 | Plasma cel DNAJA2    |
| 4739 | GRSF1     | 2.16E-19 | -0.31782 | 0.688 | 0.309 | 4.05E-15 | Plasma cel GRSF1     |
| 4740 | CCNL1     | 2.28E-19 | -0.34649 | 0.645 | 0.293 | 4.28E-15 | Plasma cel CCNL1     |
| 4741 | SHKBP1.1  | 2.55E-19 | -0.31619 | 0.789 | 0.347 | 4.79E-15 | Plasma cel SHKBP1    |
| 4742 | NKG7.1    | 3.20E-19 | -3.32457 | 0.062 | 0.205 | 6.01E-15 | Plasma cel NKG7      |
| 4743 | ICAM3     | 3.26E-19 | -0.81612 | 0.851 | 0.607 | 6.13E-15 | Plasma cel ICAM3     |
| 4744 | RAN.1     | 3.40E-19 | 0.548986 | 0.929 | 0.733 | 6.38E-15 | Plasma cel RAN       |
| 4745 | CCDC28A   | 4.43E-19 | -0.28184 | 0.34  | 0.152 | 8.33E-15 | Plasma cel CCDC28A   |
| 4746 | SUPT4H1.2 | 4.48E-19 | -0.3592  | 0.738 | 0.328 | 8.41E-15 | Plasma cel SUPT4H1   |
| 4747 | SUPT20H   | 4.50E-19 | -0.28493 | 0.356 | 0.161 | 8.45E-15 | Plasma cel SUPT20H   |
| 4748 | CGGBP1    | 4.60E-19 | -0.3627  | 0.447 | 0.204 | 8.64E-15 | Plasma cel CGGBP1    |
| 4749 | CST7      | 4.80E-19 | -1.98702 | 0.034 | 0.171 | 9.02E-15 | Plasma cel CST7      |
| 4750 | TLN1.1    | 5.30E-19 | -0.43574 | 0.518 | 0.237 | 9.96E-15 | Plasma cel TLN1      |
| 4751 | GTF2H5    | 6.32E-19 | -0.32078 | 0.424 | 0.194 | 1.19E-14 | Plasma cel GTF2H5    |
| 4752 | LDHB.1    | 6.40E-19 | -0.853   | 0.95  | 0.74  | 1.20E-14 | Plasma cel LDHB      |
| 4753 | LYAR.1    | 6.68E-19 | -0.39572 | 0.355 | 0.161 | 1.25E-14 | Plasma cel LYAR      |

|      |           |          |          |       |       |          |                    |
|------|-----------|----------|----------|-------|-------|----------|--------------------|
| 4754 | PLEKHA1.1 | 7.44E-19 | -0.48454 | 0.009 | 0.136 | 1.40E-14 | Plasma cel PLEKHA1 |
| 4755 | LYN.1     | 7.86E-19 | -0.54104 | 0.507 | 0.233 | 1.48E-14 | Plasma cel LYN     |
| 4756 | DHRS7     | 7.91E-19 | -0.41211 | 0.73  | 0.327 | 1.48E-14 | Plasma cel DHRS7   |
| 4757 | TES.1     | 9.22E-19 | -0.35312 | 0.606 | 0.277 | 1.73E-14 | Plasma cel TES     |
| 4758 | ATF6B     | 9.83E-19 | -0.35708 | 0.64  | 0.291 | 1.85E-14 | Plasma cel ATF6B   |
| 4759 | EFCAB14   | 1.00E-18 | -0.2963  | 0.337 | 0.151 | 1.88E-14 | Plasma cel EFCAB14 |
| 4760 | CYB5A.1   | 1.53E-18 | -0.34417 | 0.402 | 0.184 | 2.87E-14 | Plasma cel CYB5A   |
| 4761 | SLC25A3.1 | 1.55E-18 | 0.251657 | 0.963 | 0.718 | 2.91E-14 | Plasma cel SLC25A3 |
| 4762 | YWHAB.2   | 1.63E-18 | -0.41971 | 0.961 | 0.807 | 3.06E-14 | Plasma cel YWHAB   |
| 4763 | SON       | 1.77E-18 | -0.70941 | 0.918 | 0.641 | 3.33E-14 | Plasma cel SON     |
| 4764 | DIDO1     | 1.82E-18 | -0.27413 | 0.326 | 0.147 | 3.41E-14 | Plasma cel DIDO1   |
| 4765 | ARRB2.2   | 1.84E-18 | -1.10749 | 0.369 | 0.411 | 3.45E-14 | Plasma cel ARRB2   |
| 4766 | HLA-F.1   | 1.87E-18 | -1.06408 | 0.576 | 0.502 | 3.51E-14 | Plasma cel HLA-F   |
| 4767 | POLD4     | 2.01E-18 | -1.15273 | 0.704 | 0.547 | 3.77E-14 | Plasma cel POLD4   |
| 4768 | SMIM37    | 2.03E-18 | -0.34837 | 0.578 | 0.268 | 3.81E-14 | Plasma cel SMIM37  |
| 4769 | TRMT1     | 2.49E-18 | -0.39125 | 0.528 | 0.243 | 4.68E-14 | Plasma cel TRMT1   |
| 4770 | PSTPIP1.1 | 3.58E-18 | -0.652   | 0.067 | 0.203 | 6.73E-14 | Plasma cel PSTPIP1 |
| 4771 | MT-ND1.2  | 3.67E-18 | -0.47901 | 0.989 | 0.859 | 6.89E-14 | Plasma cel MT-ND1  |
| 4772 | NIPBL     | 3.93E-18 | -0.36435 | 0.472 | 0.218 | 7.39E-14 | Plasma cel NIPBL   |
| 4773 | CNTRL     | 4.42E-18 | -0.28313 | 0.33  | 0.15  | 8.30E-14 | Plasma cel CNTRL   |
| 4774 | YPEL3     | 5.01E-18 | -0.33259 | 0.449 | 0.212 | 9.41E-14 | Plasma cel YPEL3   |
| 4775 | RHOG.1    | 5.24E-18 | -1.10345 | 0.621 | 0.513 | 9.85E-14 | Plasma cel RHOG    |
| 4776 | TRABD2A.2 | 5.64E-18 | -0.64944 | 0.05  | 0.182 | 1.06E-13 | Plasma cel TRABD2A |
| 4777 | SH2D2A.1  | 5.69E-18 | -0.66438 | 0.016 | 0.141 | 1.07E-13 | Plasma cel SH2D2A  |
| 4778 | ELF2      | 5.80E-18 | -0.33716 | 0.374 | 0.171 | 1.09E-13 | Plasma cel ELF2    |
| 4779 | DDX6.1    | 5.80E-18 | -0.39794 | 0.596 | 0.275 | 1.09E-13 | Plasma cel DDX6    |
| 4780 | RAB5B     | 6.33E-18 | -0.26963 | 0.31  | 0.14  | 1.19E-13 | Plasma cel RAB5B   |
| 4781 | NGDN.1    | 6.39E-18 | -0.37041 | 0.528 | 0.244 | 1.20E-13 | Plasma cel NGDN    |
| 4782 | RELA.1    | 6.89E-18 | -0.34942 | 0.454 | 0.21  | 1.29E-13 | Plasma cel RELA    |
| 4783 | SRSF1.1   | 7.83E-18 | -0.33559 | 0.626 | 0.289 | 1.47E-13 | Plasma cel SRSF1   |
| 4784 | SMIM27.2  | 8.87E-18 | -0.37637 | 0.433 | 0.201 | 1.67E-13 | Plasma cel SMIM27  |
| 4785 | RGCC.2    | 1.09E-17 | -0.42853 | 0.443 | 0.206 | 2.05E-13 | Plasma cel RGCC    |
| 4786 | SNX29     | 1.12E-17 | -0.25249 | 0.264 | 0.117 | 2.11E-13 | Plasma cel SNX29   |
| 4787 | LRRN3.2   | 1.13E-17 | -0.56229 | 0.007 | 0.127 | 2.13E-13 | Plasma cel LRRN3   |
| 4788 | HNRNPK.1  | 1.16E-17 | -0.48796 | 0.929 | 0.742 | 2.18E-13 | Plasma cel HNRNPK  |
| 4789 | ALOX5.2   | 1.17E-17 | -0.73342 | 0.048 | 0.179 | 2.20E-13 | Plasma cel ALOX5   |
| 4790 | PXK       | 1.21E-17 | -0.2668  | 0.287 | 0.129 | 2.26E-13 | Plasma cel PXK     |
| 4791 | RCAN3.2   | 1.51E-17 | -0.69484 | 0.085 | 0.218 | 2.84E-13 | Plasma cel RCAN3   |
| 4792 | CD69.1    | 1.56E-17 | -0.88476 | 0.113 | 0.244 | 2.94E-13 | Plasma cel CD69    |
| 4793 | TESPA1.1  | 1.66E-17 | -0.53655 | 0.03  | 0.157 | 3.12E-13 | Plasma cel TESPA1  |
| 4794 | PIK3CD    | 1.98E-17 | -0.66176 | 0.085 | 0.216 | 3.72E-13 | Plasma cel PIK3CD  |
| 4795 | HCLS1.2   | 2.20E-17 | -0.59919 | 0.911 | 0.662 | 4.14E-13 | Plasma cel HCLS1   |
| 4796 | GRAP2.2   | 2.56E-17 | -0.51967 | 0.021 | 0.144 | 4.81E-13 | Plasma cel GRAP2   |
| 4797 | NT5C.1    | 3.06E-17 | -0.26501 | 0.8   | 0.371 | 5.75E-13 | Plasma cel NT5C    |
| 4798 | MT-ND4L.1 | 3.20E-17 | -0.39416 | 0.995 | 0.952 | 6.01E-13 | Plasma cel MT-ND4L |
| 4799 | NR1H2     | 3.54E-17 | -0.37236 | 0.532 | 0.248 | 6.65E-13 | Plasma cel NR1H2   |
| 4800 | XAF1      | 3.83E-17 | -0.59307 | 0.05  | 0.178 | 7.19E-13 | Plasma cel XAF1    |

|      |           |          |          |       |       |          |                       |
|------|-----------|----------|----------|-------|-------|----------|-----------------------|
| 4801 | POLR2G    | 4.14E-17 | -0.33545 | 0.645 | 0.299 | 7.77E-13 | Plasma cel POLR2G     |
| 4802 | DRAM2     | 4.51E-17 | -0.40981 | 0.468 | 0.219 | 8.48E-13 | Plasma cel DRAM2      |
| 4803 | PYCR2.1   | 5.03E-17 | -0.29294 | 0.314 | 0.144 | 9.46E-13 | Plasma cel PYCR2      |
| 4804 | LINC01550 | 5.08E-17 | -0.51058 | 0.021 | 0.142 | 9.54E-13 | Plasma cel LINC01550  |
| 4805 | NPTN.1    | 5.18E-17 | -0.33521 | 0.42  | 0.197 | 9.73E-13 | Plasma cel NPTN       |
| 4806 | ITSN2     | 5.31E-17 | -0.43366 | 0.569 | 0.264 | 9.97E-13 | Plasma cel ITSN2      |
| 4807 | ICAM2.1   | 5.86E-17 | -0.27323 | 0.84  | 0.383 | 1.10E-12 | Plasma cel ICAM2      |
| 4808 | IRF1.1    | 6.35E-17 | -0.28307 | 0.828 | 0.398 | 1.19E-12 | Plasma cel IRF1       |
| 4809 | GBP2.1    | 6.59E-17 | -0.6157  | 0.062 | 0.19  | 1.24E-12 | Plasma cel GBP2       |
| 4810 | BIN2.1    | 6.68E-17 | -1.07199 | 0.583 | 0.496 | 1.25E-12 | Plasma cel BIN2       |
| 4811 | SH2D1A.1  | 7.11E-17 | -0.49369 | 0.014 | 0.132 | 1.34E-12 | Plasma cel SH2D1A     |
| 4812 | ARHGAP17  | 7.40E-17 | -0.57949 | 0.044 | 0.17  | 1.39E-12 | Plasma cel ARHGAP17   |
| 4813 | BNIP2.1   | 7.66E-17 | -0.36849 | 0.624 | 0.289 | 1.44E-12 | Plasma cel BNIP2      |
| 4814 | ADAM28    | 7.82E-17 | -0.28495 | 0.199 | 0.084 | 1.47E-12 | Plasma cel ADAM28     |
| 4815 | CTSC.1    | 9.35E-17 | -0.46797 | 0.695 | 0.329 | 1.76E-12 | Plasma cel CTSC       |
| 4816 | ZEB2.1    | 9.38E-17 | -0.60542 | 0.028 | 0.151 | 1.76E-12 | Plasma cel ZEB2       |
| 4817 | RPL35.2   | 9.73E-17 | -0.25056 | 0.991 | 0.982 | 1.83E-12 | Plasma cel RPL35      |
| 4818 | LINC02273 | 9.85E-17 | -0.52648 | 0.028 | 0.15  | 1.85E-12 | Plasma cel LINC02273  |
| 4819 | RNF130.2  | 1.30E-16 | -0.70196 | 0.034 | 0.156 | 2.44E-12 | Plasma cel RNF130     |
| 4820 | INPP4B.1  | 1.37E-16 | -0.48289 | 0.016 | 0.133 | 2.58E-12 | Plasma cel INPP4B     |
| 4821 | SAMD9     | 1.39E-16 | -0.3094  | 0.335 | 0.156 | 2.60E-12 | Plasma cel SAMD9      |
| 4822 | CD72.2    | 1.41E-16 | -0.87825 | 0.035 | 0.158 | 2.66E-12 | Plasma cel CD72       |
| 4823 | ZNF581    | 1.45E-16 | -0.32629 | 0.385 | 0.181 | 2.72E-12 | Plasma cel ZNF581     |
| 4824 | ZNF146.1  | 1.57E-16 | -0.28664 | 0.319 | 0.148 | 2.96E-12 | Plasma cel ZNF146     |
| 4825 | PTPN6.1   | 1.75E-16 | -0.98741 | 0.807 | 0.602 | 3.28E-12 | Plasma cel PTPN6      |
| 4826 | AL138963. | 1.83E-16 | -0.40938 | 0.427 | 0.213 | 3.44E-12 | Plasma cel AL138963.3 |
| 4827 | RRAGA     | 2.01E-16 | -0.39307 | 0.465 | 0.219 | 3.78E-12 | Plasma cel RRAGA      |
| 4828 | APBB1.1   | 2.20E-16 | -0.45671 | 0.014 | 0.129 | 4.13E-12 | Plasma cel APBB1      |
| 4829 | ETHE1     | 2.28E-16 | -0.35594 | 0.431 | 0.203 | 4.29E-12 | Plasma cel ETHE1      |
| 4830 | NCF1.2    | 2.31E-16 | -0.49824 | 0.961 | 0.479 | 4.33E-12 | Plasma cel NCF1       |
| 4831 | GZMA.1    | 2.34E-16 | -1.42179 | 0.021 | 0.139 | 4.40E-12 | Plasma cel GZMA       |
| 4832 | TAF15     | 2.40E-16 | -0.32038 | 0.431 | 0.205 | 4.50E-12 | Plasma cel TAF15      |
| 4833 | EIF4A2.1  | 2.41E-16 | -1.01693 | 0.69  | 0.531 | 4.52E-12 | Plasma cel EIF4A2     |
| 4834 | CCL5.2    | 2.44E-16 | -2.47858 | 0.03  | 0.15  | 4.59E-12 | Plasma cel CCL5       |
| 4835 | FOXN3     | 2.78E-16 | -0.30453 | 0.365 | 0.172 | 5.23E-12 | Plasma cel FOXN3      |
| 4836 | IST1      | 2.81E-16 | -0.36216 | 0.436 | 0.206 | 5.28E-12 | Plasma cel IST1       |
| 4837 | UBASH3A.  | 3.01E-16 | -0.4291  | 0.012 | 0.125 | 5.65E-12 | Plasma cel UBASH3A    |
| 4838 | THEMIS.2  | 3.26E-16 | -0.44418 | 0.014 | 0.128 | 6.12E-12 | Plasma cel THEMIS     |
| 4839 | GPX4.2    | 3.90E-16 | -0.76577 | 0.826 | 0.601 | 7.33E-12 | Plasma cel GPX4       |
| 4840 | NCR3.1    | 4.04E-16 | -0.53347 | 0.009 | 0.119 | 7.59E-12 | Plasma cel NCR3       |
| 4841 | DPYD.1    | 4.62E-16 | -0.65223 | 0.089 | 0.212 | 8.68E-12 | Plasma cel DPYD       |
| 4842 | QRSL1.1   | 5.02E-16 | -0.32662 | 0.278 | 0.128 | 9.42E-12 | Plasma cel QRSL1      |
| 4843 | ASH1L     | 5.85E-16 | -0.27705 | 0.328 | 0.155 | 1.10E-11 | Plasma cel ASH1L      |
| 4844 | ACTR3.1   | 5.88E-16 | -0.61235 | 0.89  | 0.661 | 1.10E-11 | Plasma cel ACTR3      |
| 4845 | PIP4P1    | 5.96E-16 | -0.29701 | 0.305 | 0.142 | 1.12E-11 | Plasma cel PIP4P1     |
| 4846 | DIAPH1.1  | 6.06E-16 | -0.25186 | 0.312 | 0.147 | 1.14E-11 | Plasma cel DIAPH1     |
| 4847 | ZNF430.1  | 6.93E-16 | -0.26116 | 0.277 | 0.127 | 1.30E-11 | Plasma cel ZNF430     |

|      |           |          |          |       |       |          |                      |
|------|-----------|----------|----------|-------|-------|----------|----------------------|
| 4848 | ANKRD49   | 8.03E-16 | -0.27604 | 0.294 | 0.138 | 1.51E-11 | Plasma cel ANKRD49   |
| 4849 | TNFRSF25  | 8.07E-16 | -0.43934 | 0.014 | 0.125 | 1.52E-11 | Plasma cel TNFRSF25  |
| 4850 | SDHD      | 8.07E-16 | -0.25261 | 0.73  | 0.342 | 1.52E-11 | Plasma cel SDHD      |
| 4851 | HIST1H2AC | 8.34E-16 | -0.48902 | 0.408 | 0.197 | 1.57E-11 | Plasma cel HIST1H2AC |
| 4852 | GLIPR2.1  | 8.55E-16 | -0.45558 | 0.41  | 0.195 | 1.61E-11 | Plasma cel GLIPR2    |
| 4853 | GID8      | 9.38E-16 | -0.31649 | 0.649 | 0.306 | 1.76E-11 | Plasma cel GID8      |
| 4854 | LINC02446 | 9.41E-16 | -1.08251 | 0.021 | 0.134 | 1.77E-11 | Plasma cel LINC02446 |
| 4855 | SUMO2.1   | 1.08E-15 | -0.33622 | 0.952 | 0.844 | 2.02E-11 | Plasma cel SUMO2     |
| 4856 | LINC00623 | 1.16E-15 | -0.53386 | 0.041 | 0.158 | 2.18E-11 | Plasma cel LINC00623 |
| 4857 | PCM1      | 1.30E-15 | -0.35308 | 0.426 | 0.203 | 2.45E-11 | Plasma cel PCM1      |
| 4858 | TSEN34.2  | 1.32E-15 | -0.29367 | 0.34  | 0.161 | 2.47E-11 | Plasma cel TSEN34    |
| 4859 | TTC14.1   | 1.32E-15 | -0.34946 | 0.383 | 0.183 | 2.48E-11 | Plasma cel TTC14     |
| 4860 | SYNE1     | 1.72E-15 | -0.35451 | 0.349 | 0.166 | 3.22E-11 | Plasma cel SYNE1     |
| 4861 | SMARCE1   | 1.74E-15 | -0.37248 | 0.507 | 0.242 | 3.26E-11 | Plasma cel SMARCE1   |
| 4862 | GGNBP2    | 2.23E-15 | -0.3919  | 0.596 | 0.281 | 4.19E-11 | Plasma cel GGNBP2    |
| 4863 | CDKN1B.1  | 2.45E-15 | -0.41754 | 0.599 | 0.283 | 4.60E-11 | Plasma cel CDKN1B    |
| 4864 | TADA3     | 2.68E-15 | -0.40903 | 0.56  | 0.266 | 5.04E-11 | Plasma cel TADA3     |
| 4865 | ZFAND2B   | 3.07E-15 | -0.36127 | 0.402 | 0.193 | 5.77E-11 | Plasma cel ZFAND2B   |
| 4866 | ILF3-DT.1 | 3.62E-15 | -0.32586 | 0.351 | 0.168 | 6.80E-11 | Plasma cel ILF3-DT   |
| 4867 | FLI1      | 3.78E-15 | -0.39257 | 0.574 | 0.274 | 7.11E-11 | Plasma cel FLI1      |
| 4868 | ARL4C.2   | 3.80E-15 | -0.44579 | 0.548 | 0.263 | 7.14E-11 | Plasma cel ARL4C     |
| 4869 | PRDM2     | 3.88E-15 | -0.25048 | 0.252 | 0.116 | 7.28E-11 | Plasma cel PRDM2     |
| 4870 | DNAJB14   | 3.96E-15 | -0.29844 | 0.326 | 0.155 | 7.43E-11 | Plasma cel DNAJB14   |
| 4871 | CHI3L2.1  | 4.16E-15 | -0.61792 | 0.043 | 0.157 | 7.81E-11 | Plasma cel CHI3L2    |
| 4872 | GBP4      | 4.63E-15 | -0.43324 | 0.018 | 0.125 | 8.70E-11 | Plasma cel GBP4      |
| 4873 | TRAF5.1   | 4.94E-15 | -0.49156 | 0.03  | 0.141 | 9.27E-11 | Plasma cel TRAF5     |
| 4874 | DOCK2.1   | 4.99E-15 | -0.28499 | 0.333 | 0.16  | 9.37E-11 | Plasma cel DOCK2     |
| 4875 | LINC00926 | 5.23E-15 | -1.06401 | 0.076 | 0.193 | 9.83E-11 | Plasma cel LINC00926 |
| 4876 | HLA-DQA1  | 6.42E-15 | -1.09512 | 0.574 | 0.274 | 1.21E-10 | Plasma cel HLA-DQA1  |
| 4877 | ZRSR2     | 8.02E-15 | -0.25214 | 0.275 | 0.129 | 1.51E-10 | Plasma cel ZRSR2     |
| 4878 | NELL2.2   | 8.50E-15 | -0.48571 | 0.014 | 0.119 | 1.60E-10 | Plasma cel NELL2     |
| 4879 | PNN.2     | 9.05E-15 | -0.32519 | 0.688 | 0.328 | 1.70E-10 | Plasma cel PNN       |
| 4880 | CASP4     | 9.47E-15 | -0.4419  | 0.606 | 0.288 | 1.78E-10 | Plasma cel CASP4     |
| 4881 | SERPINB6  | 9.48E-15 | -0.43467 | 0.021 | 0.128 | 1.78E-10 | Plasma cel SERPINB6  |
| 4882 | CHIC2     | 9.48E-15 | -0.31651 | 0.36  | 0.175 | 1.78E-10 | Plasma cel CHIC2     |
| 4883 | GDI1      | 1.02E-14 | -0.35133 | 0.422 | 0.205 | 1.91E-10 | Plasma cel GDI1      |
| 4884 | GNPTAB    | 1.05E-14 | -0.25816 | 0.234 | 0.107 | 1.98E-10 | Plasma cel GNPTAB    |
| 4885 | OGA       | 1.12E-14 | -0.34641 | 0.401 | 0.195 | 2.10E-10 | Plasma cel OGA       |
| 4886 | N4BP2L1   | 1.15E-14 | -0.29786 | 0.335 | 0.161 | 2.16E-10 | Plasma cel N4BP2L1   |
| 4887 | FCGR3A.2  | 1.18E-14 | -1.35465 | 0.018 | 0.123 | 2.21E-10 | Plasma cel FCGR3A    |
| 4888 | PTTG1IP.2 | 1.51E-14 | -0.29263 | 0.301 | 0.144 | 2.84E-10 | Plasma cel PTTG1IP   |
| 4889 | FOXN2     | 1.60E-14 | -0.28729 | 0.309 | 0.148 | 3.00E-10 | Plasma cel FOXN2     |
| 4890 | CD24.1    | 1.69E-14 | -0.63811 | 0.016 | 0.119 | 3.17E-10 | Plasma cel CD24      |
| 4891 | KRI1      | 1.69E-14 | -0.2957  | 0.294 | 0.14  | 3.18E-10 | Plasma cel KRI1      |
| 4892 | CD40LG.1  | 2.02E-14 | -0.48615 | 0.012 | 0.114 | 3.79E-10 | Plasma cel CD40LG    |
| 4893 | FAM32A    | 2.03E-14 | -0.36453 | 0.622 | 0.296 | 3.81E-10 | Plasma cel FAM32A    |
| 4894 | IL2RG.1   | 2.21E-14 | -0.28398 | 0.291 | 0.14  | 4.15E-10 | Plasma cel IL2RG     |

|      |            |          |          |       |       |          |            |           |
|------|------------|----------|----------|-------|-------|----------|------------|-----------|
| 4895 | TTC39C     | 2.23E-14 | -0.42468 | 0.021 | 0.126 | 4.19E-10 | Plasma cel | TTC39C    |
| 4896 | ZNF22.2    | 2.44E-14 | -0.40542 | 0.585 | 0.28  | 4.59E-10 | Plasma cel | ZNF22     |
| 4897 | KLRB1.1    | 2.45E-14 | -1.18914 | 0.018 | 0.121 | 4.60E-10 | Plasma cel | KLRB1     |
| 4898 | MARCH1.1   | 2.49E-14 | -0.49121 | 0.02  | 0.123 | 4.68E-10 | Plasma cel | Mar-01    |
| 4899 | ATF7IP     | 2.75E-14 | -0.32687 | 0.333 | 0.162 | 5.17E-10 | Plasma cel | ATF7IP    |
| 4900 | AOAH.1     | 2.78E-14 | -0.49672 | 0.025 | 0.13  | 5.22E-10 | Plasma cel | AOAH      |
| 4901 | SOX4.1     | 2.90E-14 | -0.25025 | 0.218 | 0.1   | 5.45E-10 | Plasma cel | SOX4      |
| 4902 | HIGD2A.1   | 3.13E-14 | -0.52094 | 0.931 | 0.666 | 5.88E-10 | Plasma cel | HIGD2A    |
| 4903 | PITHD1.1   | 3.18E-14 | -0.36871 | 0.44  | 0.214 | 5.98E-10 | Plasma cel | PITHD1    |
| 4904 | ARID5B.1   | 3.21E-14 | -0.45851 | 0.459 | 0.225 | 6.03E-10 | Plasma cel | ARID5B    |
| 4905 | SASH3      | 3.57E-14 | -0.41283 | 0.693 | 0.328 | 6.70E-10 | Plasma cel | SASH3     |
| 4906 | SHISAL2A.1 | 3.99E-14 | -0.36364 | 0.34  | 0.165 | 7.50E-10 | Plasma cel | SHISAL2A  |
| 4907 | NCBP2-AS2  | 4.01E-14 | -0.37393 | 0.578 | 0.28  | 7.53E-10 | Plasma cel | NCBP2-AS2 |
| 4908 | IPCEF1.1   | 4.05E-14 | -0.38981 | 0.012 | 0.112 | 7.60E-10 | Plasma cel | IPCEF1    |
| 4909 | Mar-07     | 4.14E-14 | -0.33451 | 0.362 | 0.176 | 7.78E-10 | Plasma cel | Mar-07    |
| 4910 | GIMAP8.1   | 4.44E-14 | -0.36196 | 0.009 | 0.106 | 8.34E-10 | Plasma cel | GIMAP8    |
| 4911 | LY86.1     | 4.97E-14 | -0.63515 | 0.053 | 0.163 | 9.34E-10 | Plasma cel | LY86      |
| 4912 | SETX       | 5.36E-14 | -0.33374 | 0.371 | 0.182 | 1.01E-09 | Plasma cel | SETX      |
| 4913 | CALCOCO2   | 5.51E-14 | -0.38183 | 0.512 | 0.249 | 1.04E-09 | Plasma cel | CALCOCO2  |
| 4914 | ANXA11     | 5.61E-14 | -0.7471  | 0.789 | 0.567 | 1.05E-09 | Plasma cel | ANXA11    |
| 4915 | MYC.1      | 5.75E-14 | -1.14357 | 0.367 | 0.405 | 1.08E-09 | Plasma cel | MYC       |
| 4916 | FNBP4.1    | 6.22E-14 | -0.41701 | 0.605 | 0.291 | 1.17E-09 | Plasma cel | FNBP4     |
| 4917 | PTGER2     | 6.34E-14 | -0.45837 | 0.009 | 0.105 | 1.19E-09 | Plasma cel | PTGER2    |
| 4918 | AFF3.1     | 6.58E-14 | -0.51865 | 0.018 | 0.118 | 1.24E-09 | Plasma cel | AFF3      |
| 4919 | RGL4.1     | 6.80E-14 | -0.45045 | 0.016 | 0.115 | 1.28E-09 | Plasma cel | RGL4      |
| 4920 | RHOT2      | 7.17E-14 | -0.37114 | 0.399 | 0.195 | 1.35E-09 | Plasma cel | RHOT2     |
| 4921 | HDAC10     | 7.49E-14 | -0.30135 | 0.332 | 0.161 | 1.41E-09 | Plasma cel | HDAC10    |
| 4922 | MTRNR2L1   | 7.59E-14 | -0.29163 | 0.993 | 0.943 | 1.43E-09 | Plasma cel | MTRNR2L12 |
| 4923 | PDE3B.2    | 8.21E-14 | -0.49905 | 0.041 | 0.147 | 1.54E-09 | Plasma cel | PDE3B     |
| 4924 | ILK.1      | 8.73E-14 | -0.41742 | 0.525 | 0.255 | 1.64E-09 | Plasma cel | ILK       |
| 4925 | CRTC2      | 8.78E-14 | -0.27079 | 0.278 | 0.134 | 1.65E-09 | Plasma cel | CRTC2     |
| 4926 | RBMS1.1    | 9.88E-14 | -0.54803 | 0.073 | 0.183 | 1.86E-09 | Plasma cel | RBMS1     |
| 4927 | RPAIN.2    | 1.06E-13 | -0.37123 | 0.52  | 0.254 | 1.98E-09 | Plasma cel | RPAIN     |
| 4928 | SPI1.1     | 1.15E-13 | -0.68055 | 0.344 | 0.168 | 2.15E-09 | Plasma cel | SPI1      |
| 4929 | SPTAN1.1   | 1.27E-13 | -0.35865 | 0.392 | 0.194 | 2.38E-09 | Plasma cel | SPTAN1    |
| 4930 | MED28      | 1.28E-13 | -0.3747  | 0.48  | 0.236 | 2.40E-09 | Plasma cel | MED28     |
| 4931 | CCL4.1     | 1.29E-13 | -1.21485 | 0.011 | 0.106 | 2.42E-09 | Plasma cel | CCL4      |
| 4932 | BAZ1A.1    | 1.30E-13 | -0.3792  | 0.502 | 0.247 | 2.44E-09 | Plasma cel | BAZ1A     |
| 4933 | MAT2A.2    | 1.35E-13 | -0.3342  | 0.502 | 0.249 | 2.54E-09 | Plasma cel | MAT2A     |
| 4934 | PDCD10     | 1.36E-13 | -0.4128  | 0.605 | 0.292 | 2.55E-09 | Plasma cel | PDCD10    |
| 4935 | BACH2.1    | 1.57E-13 | -0.77985 | 0.096 | 0.203 | 2.96E-09 | Plasma cel | BACH2     |
| 4936 | NCKAP1L.1  | 1.75E-13 | -0.40991 | 0.482 | 0.237 | 3.29E-09 | Plasma cel | NCKAP1L   |
| 4937 | ACAP1.1    | 2.02E-13 | -1.00705 | 0.61  | 0.49  | 3.79E-09 | Plasma cel | ACAP1     |
| 4938 | PRKCQ.1    | 2.13E-13 | -0.35487 | 0.009 | 0.102 | 3.99E-09 | Plasma cel | PRKCQ     |
| 4939 | ZYX.1      | 2.24E-13 | -1.11507 | 0.387 | 0.395 | 4.20E-09 | Plasma cel | ZYX       |
| 4940 | FCN1.2     | 2.29E-13 | -1.42044 | 0.012 | 0.107 | 4.30E-09 | Plasma cel | FCN1      |
| 4941 | ZNF800.1   | 2.41E-13 | -0.38827 | 0.452 | 0.224 | 4.52E-09 | Plasma cel | ZNF800    |

|      |            |          |          |       |       |          |                       |
|------|------------|----------|----------|-------|-------|----------|-----------------------|
| 4942 | CDC42SE2.  | 2.41E-13 | -0.40934 | 0.613 | 0.298 | 4.53E-09 | Plasma cel CDC42SE2   |
| 4943 | HNRNPF.2   | 2.44E-13 | -0.47856 | 0.901 | 0.691 | 4.59E-09 | Plasma cel HNRNPF     |
| 4944 | PRF1.2     | 2.51E-13 | -1.8105  | 0.069 | 0.176 | 4.72E-09 | Plasma cel PRF1       |
| 4945 | ZC3HAV1.1  | 2.65E-13 | -0.42957 | 0.534 | 0.262 | 4.98E-09 | Plasma cel ZC3HAV1    |
| 4946 | SNHG12.2   | 2.75E-13 | -0.29208 | 0.28  | 0.136 | 5.16E-09 | Plasma cel SNHG12     |
| 4947 | MAT2B.1    | 2.75E-13 | -0.8717  | 0.771 | 0.546 | 5.17E-09 | Plasma cel MAT2B      |
| 4948 | AC116366.  | 2.82E-13 | -0.3343  | 0.314 | 0.154 | 5.30E-09 | Plasma cel AC116366.3 |
| 4949 | CHD3       | 3.04E-13 | -0.49003 | 0.046 | 0.15  | 5.71E-09 | Plasma cel CHD3       |
| 4950 | ADSS       | 3.21E-13 | -0.37895 | 0.459 | 0.227 | 6.04E-09 | Plasma cel ADSS       |
| 4951 | PPP1R11    | 3.31E-13 | -0.40496 | 0.557 | 0.272 | 6.22E-09 | Plasma cel PPP1R11    |
| 4952 | DDX18.1    | 3.63E-13 | -0.27865 | 0.793 | 0.38  | 6.82E-09 | Plasma cel DDX18      |
| 4953 | CAPZA2.2   | 3.74E-13 | -0.35055 | 0.72  | 0.343 | 7.03E-09 | Plasma cel CAPZA2     |
| 4954 | C12orf65.1 | 3.79E-13 | -0.34034 | 0.365 | 0.181 | 7.12E-09 | Plasma cel C12orf65   |
| 4955 | RPP21      | 3.83E-13 | -0.35239 | 0.365 | 0.182 | 7.19E-09 | Plasma cel RPP21      |
| 4956 | ZNRD1      | 4.21E-13 | -0.36439 | 0.619 | 0.301 | 7.91E-09 | Plasma cel ZNRD1      |
| 4957 | PHF3       | 4.46E-13 | -0.41312 | 0.488 | 0.241 | 8.38E-09 | Plasma cel PHF3       |
| 4958 | ZCCHC7.1   | 4.91E-13 | -0.43525 | 0.434 | 0.216 | 9.22E-09 | Plasma cel ZCCHC7     |
| 4959 | SLC25A38.  | 4.95E-13 | -0.33788 | 0.335 | 0.166 | 9.30E-09 | Plasma cel SLC25A38   |
| 4960 | RAP1B      | 5.28E-13 | -0.67978 | 0.851 | 0.622 | 9.92E-09 | Plasma cel RAP1B      |
| 4961 | FNTA.1     | 6.12E-13 | -0.40533 | 0.488 | 0.242 | 1.15E-08 | Plasma cel FNTA       |
| 4962 | TAX1BP1    | 6.14E-13 | -0.27866 | 0.807 | 0.38  | 1.15E-08 | Plasma cel TAX1BP1    |
| 4963 | RAB14      | 6.34E-13 | -0.37495 | 0.557 | 0.275 | 1.19E-08 | Plasma cel RAB14      |
| 4964 | FUS.1      | 6.70E-13 | -0.88957 | 0.66  | 0.518 | 1.26E-08 | Plasma cel FUS        |
| 4965 | ERICH1.1   | 6.92E-13 | -0.39415 | 0.447 | 0.223 | 1.30E-08 | Plasma cel ERICH1     |
| 4966 | MARCKSL1   | 7.62E-13 | -0.88476 | 0.186 | 0.273 | 1.43E-08 | Plasma cel MARCKSL1   |
| 4967 | BTN3A2.1   | 8.47E-13 | -0.42352 | 0.504 | 0.251 | 1.59E-08 | Plasma cel BTN3A2     |
| 4968 | STMN3.1    | 8.61E-13 | -0.61906 | 0.09  | 0.193 | 1.62E-08 | Plasma cel STMN3      |
| 4969 | PLD4       | 8.63E-13 | -0.57677 | 0.014 | 0.106 | 1.62E-08 | Plasma cel PLD4       |
| 4970 | VAMP8.2    | 8.81E-13 | -0.77373 | 0.855 | 0.579 | 1.66E-08 | Plasma cel VAMP8      |
| 4971 | MTSS1.1    | 9.16E-13 | -0.59241 | 0.05  | 0.151 | 1.72E-08 | Plasma cel MTSS1      |
| 4972 | KAT8       | 9.48E-13 | -0.36653 | 0.356 | 0.177 | 1.78E-08 | Plasma cel KAT8       |
| 4973 | HINT1.2    | 9.57E-13 | -0.30341 | 0.968 | 0.914 | 1.80E-08 | Plasma cel HINT1      |
| 4974 | MATK.1     | 1.05E-12 | -0.54632 | 0.023 | 0.118 | 1.97E-08 | Plasma cel MATK       |
| 4975 | CFP.1      | 1.07E-12 | -0.55482 | 0.021 | 0.115 | 2.01E-08 | Plasma cel CFP        |
| 4976 | ELF1       | 1.29E-12 | -0.42237 | 0.707 | 0.338 | 2.42E-08 | Plasma cel ELF1       |
| 4977 | AC025164.  | 1.31E-12 | -0.56386 | 0.053 | 0.154 | 2.46E-08 | Plasma cel AC025164.1 |
| 4978 | GIT2       | 1.33E-12 | -0.34138 | 0.39  | 0.196 | 2.50E-08 | Plasma cel GIT2       |
| 4979 | SH3BGRL.2  | 1.37E-12 | -0.82687 | 0.805 | 0.551 | 2.58E-08 | Plasma cel SH3BGRL    |
| 4980 | TGIF1      | 1.48E-12 | -0.37477 | 0.014 | 0.104 | 2.79E-08 | Plasma cel TGIF1      |
| 4981 | LGALS3BP   | 1.56E-12 | -0.35829 | 0.018 | 0.109 | 2.94E-08 | Plasma cel LGALS3BP   |
| 4982 | RPS20      | 1.57E-12 | -0.3146  | 0.676 | 0.332 | 2.95E-08 | Plasma cel RPS20      |
| 4983 | CDC42EP3.  | 1.63E-12 | -0.4035  | 0.353 | 0.177 | 3.06E-08 | Plasma cel CDC42EP3   |
| 4984 | FGFBP2.2   | 1.65E-12 | -1.37366 | 0.012 | 0.101 | 3.10E-08 | Plasma cel FGFBP2     |
| 4985 | SEPT1.2    | 1.77E-12 | -0.82982 | 0.842 | 0.575 | 3.33E-08 | Plasma cel Sep-01     |
| 4986 | CLEC2D.2   | 1.86E-12 | -0.43191 | 0.651 | 0.317 | 3.50E-08 | Plasma cel CLEC2D     |
| 4987 | LENG1      | 1.99E-12 | -0.26619 | 0.261 | 0.128 | 3.74E-08 | Plasma cel LENG1      |
| 4988 | MPEG1.1    | 2.57E-12 | -0.41872 | 0.012 | 0.1   | 4.83E-08 | Plasma cel MPEG1      |

|                |          |          |       |       |          |                         |
|----------------|----------|----------|-------|-------|----------|-------------------------|
| 4989 TAZ       | 2.68E-12 | -0.35239 | 0.374 | 0.189 | 5.04E-08 | Plasma cel TAZ          |
| 4990 RTN4.2    | 2.73E-12 | -0.37811 | 0.582 | 0.289 | 5.14E-08 | Plasma cel RTN4         |
| 4991 TAF1D.2   | 2.83E-12 | -0.40135 | 0.645 | 0.315 | 5.31E-08 | Plasma cel TAF1D        |
| 4992 EAPP      | 2.95E-12 | -0.45129 | 0.608 | 0.296 | 5.54E-08 | Plasma cel EAPP         |
| 4993 MKRN1     | 3.00E-12 | -0.4138  | 0.434 | 0.218 | 5.63E-08 | Plasma cel MKRN1        |
| 4994 CNPPD1    | 3.01E-12 | -0.44774 | 0.541 | 0.267 | 5.66E-08 | Plasma cel CNPPD1       |
| 4995 SLC25A6   | 3.03E-12 | -0.35433 | 0.959 | 0.795 | 5.70E-08 | Plasma cel SLC25A6      |
| 4996 ARPC5.1   | 3.59E-12 | -0.63286 | 0.879 | 0.62  | 6.75E-08 | Plasma cel ARPC5        |
| 4997 LINC02397 | 3.70E-12 | -0.29214 | 0.186 | 0.087 | 6.95E-08 | Plasma cel LINC02397    |
| 4998 RPS2.1    | 3.70E-12 | -0.46344 | 0.968 | 0.854 | 6.95E-08 | Plasma cel RPS2         |
| 4999 SDCBP.1   | 3.75E-12 | -0.9388  | 0.31  | 0.348 | 7.04E-08 | Plasma cel SDCBP        |
| 5000 RNF125.1  | 4.23E-12 | -0.47729 | 0.048 | 0.144 | 7.94E-08 | Plasma cel RNF125       |
| 5001 METTL9.1  | 4.23E-12 | -0.45653 | 0.658 | 0.317 | 7.95E-08 | Plasma cel METTL9       |
| 5002 ZNF24.1   | 4.84E-12 | -0.44058 | 0.523 | 0.26  | 9.09E-08 | Plasma cel ZNF24        |
| 5003 BCL11B.2  | 5.03E-12 | -0.39647 | 0.02  | 0.108 | 9.46E-08 | Plasma cel BCL11B       |
| 5004 ITGAL.1   | 5.34E-12 | -0.31597 | 0.294 | 0.148 | 1.00E-07 | Plasma cel ITGAL        |
| 5005 TNFAIP8L2 | 5.36E-12 | -0.54078 | 0.08  | 0.178 | 1.01E-07 | Plasma cel TNFAIP8L2    |
| 5006 MOB2      | 5.40E-12 | -0.32666 | 0.323 | 0.163 | 1.01E-07 | Plasma cel MOB2         |
| 5007 MAPKAPK5  | 5.57E-12 | -0.42321 | 0.468 | 0.236 | 1.05E-07 | Plasma cel MAPKAPK5-AS1 |
| 5008 HHEX      | 5.63E-12 | -0.47178 | 0.027 | 0.117 | 1.06E-07 | Plasma cel HHEX         |
| 5009 SF3A1.1   | 5.68E-12 | -0.38776 | 0.59  | 0.292 | 1.07E-07 | Plasma cel SF3A1        |
| 5010 MNDA.1    | 5.92E-12 | -0.9908  | 0.025 | 0.115 | 1.11E-07 | Plasma cel MNDA         |
| 5011 ARPC4.1   | 6.82E-12 | -0.26844 | 0.262 | 0.131 | 1.28E-07 | Plasma cel ARPC4        |
| 5012 CDC42.1   | 7.48E-12 | -0.53168 | 0.915 | 0.654 | 1.41E-07 | Plasma cel CDC42        |
| 5013 TP53TG1   | 7.78E-12 | -0.28412 | 0.264 | 0.131 | 1.46E-07 | Plasma cel TP53TG1      |
| 5014 HLA-A.1   | 8.10E-12 | -0.32813 | 0.988 | 0.902 | 1.52E-07 | Plasma cel HLA-A        |
| 5015 SERPINA1. | 8.53E-12 | -1.52433 | 0.025 | 0.114 | 1.60E-07 | Plasma cel SERPINA1     |
| 5016 C9orf16.1 | 9.62E-12 | -0.65775 | 0.878 | 0.592 | 1.81E-07 | Plasma cel C9orf16      |
| 5017 CDK10     | 9.82E-12 | -0.33402 | 0.323 | 0.163 | 1.84E-07 | Plasma cel CDK10        |
| 5018 SYTL1.1   | 1.02E-11 | -0.90416 | 0.475 | 0.437 | 1.92E-07 | Plasma cel SYTL1        |
| 5019 PAIP2     | 1.09E-11 | -0.77282 | 0.812 | 0.555 | 2.06E-07 | Plasma cel PAIP2        |
| 5020 RPA2.1    | 1.15E-11 | -0.36776 | 0.585 | 0.291 | 2.16E-07 | Plasma cel RPA2         |
| 5021 CD22.1    | 1.51E-11 | -0.53904 | 0.025 | 0.112 | 2.84E-07 | Plasma cel CD22         |
| 5022 SVBP      | 1.54E-11 | -0.36595 | 0.346 | 0.176 | 2.88E-07 | Plasma cel SVBP         |
| 5023 CAT.1     | 1.59E-11 | -0.42324 | 0.518 | 0.26  | 2.98E-07 | Plasma cel CAT          |
| 5024 GNLY.1    | 1.61E-11 | -2.98747 | 0.018 | 0.102 | 3.02E-07 | Plasma cel GNLY         |
| 5025 PPCS      | 1.74E-11 | -0.41113 | 0.647 | 0.317 | 3.27E-07 | Plasma cel PPCS         |
| 5026 EXOC7     | 2.18E-11 | -0.25809 | 0.259 | 0.13  | 4.10E-07 | Plasma cel EXOC7        |
| 5027 RAB11B    | 2.25E-11 | -0.34617 | 0.768 | 0.368 | 4.23E-07 | Plasma cel RAB11B       |
| 5028 STK17A.2  | 2.25E-11 | -1.02539 | 0.445 | 0.414 | 4.23E-07 | Plasma cel STK17A       |
| 5029 STAT1     | 2.29E-11 | -0.52555 | 0.557 | 0.282 | 4.30E-07 | Plasma cel STAT1        |
| 5030 SLC25A37. | 2.35E-11 | -0.4678  | 0.22  | 0.109 | 4.41E-07 | Plasma cel SLC25A37     |
| 5031 RAB11A.1  | 2.43E-11 | -0.41565 | 0.629 | 0.311 | 4.57E-07 | Plasma cel RAB11A       |
| 5032 LAPTM4A.  | 2.75E-11 | -0.36194 | 0.775 | 0.37  | 5.17E-07 | Plasma cel LAPTM4A      |
| 5033 GATA3.1   | 2.84E-11 | -0.41035 | 0.028 | 0.115 | 5.33E-07 | Plasma cel GATA3        |
| 5034 SELENOW   | 3.12E-11 | -0.90782 | 0.631 | 0.49  | 5.86E-07 | Plasma cel SELENOW      |
| 5035 PGS1.1    | 3.58E-11 | -0.35249 | 0.282 | 0.143 | 6.73E-07 | Plasma cel PGS1         |

|      |           |          |          |       |       |          |            |          |
|------|-----------|----------|----------|-------|-------|----------|------------|----------|
| 5036 | GLOD4.1   | 3.64E-11 | -0.40923 | 0.47  | 0.239 | 6.84E-07 | Plasma cel | GLOD4    |
| 5037 | LENG8     | 3.83E-11 | -0.3727  | 0.39  | 0.202 | 7.19E-07 | Plasma cel | LENG8    |
| 5038 | DYNLT1.2  | 3.86E-11 | -0.49043 | 0.573 | 0.285 | 7.24E-07 | Plasma cel | DYNLT1   |
| 5039 | HTATIP2   | 3.87E-11 | -0.36112 | 0.376 | 0.193 | 7.27E-07 | Plasma cel | HTATIP2  |
| 5040 | HLA-DRB5. | 3.94E-11 | -1.65349 | 0.784 | 0.388 | 7.41E-07 | Plasma cel | HLA-DRB5 |
| 5041 | KDM4C     | 3.95E-11 | -0.27389 | 0.264 | 0.134 | 7.42E-07 | Plasma cel | KDM4C    |
| 5042 | THUMPD1   | 4.14E-11 | -0.3195  | 0.307 | 0.157 | 7.78E-07 | Plasma cel | THUMPD1  |
| 5043 | APBB1IP   | 4.29E-11 | -0.92002 | 0.543 | 0.454 | 8.06E-07 | Plasma cel | APBB1IP  |
| 5044 | SCIMP.2   | 4.49E-11 | -0.4341  | 0.02  | 0.102 | 8.43E-07 | Plasma cel | SCIMP    |
| 5045 | RPL17.2   | 4.56E-11 | -0.47159 | 0.941 | 0.71  | 8.56E-07 | Plasma cel | RPL17    |
| 5046 | HACD4.1   | 5.59E-11 | -0.42561 | 0.449 | 0.23  | 1.05E-06 | Plasma cel | HACD4    |
| 5047 | UHMK1     | 5.99E-11 | -0.34731 | 0.353 | 0.182 | 1.12E-06 | Plasma cel | UHMK1    |
| 5048 | SAMHD1.2  | 6.53E-11 | -1.13371 | 0.461 | 0.416 | 1.23E-06 | Plasma cel | SAMHD1   |
| 5049 | CPPED1.1  | 6.85E-11 | -0.2588  | 0.186 | 0.09  | 1.29E-06 | Plasma cel | CPPED1   |
| 5050 | CYBC1     | 7.01E-11 | -0.31614 | 0.83  | 0.401 | 1.32E-06 | Plasma cel | CYBC1    |
| 5051 | ITM2A.1   | 7.48E-11 | -1.05908 | 0.326 | 0.354 | 1.41E-06 | Plasma cel | ITM2A    |
| 5052 | STARD3    | 7.80E-11 | -0.39645 | 0.417 | 0.215 | 1.46E-06 | Plasma cel | STARD3   |
| 5053 | CD74.2    | 9.74E-11 | -2.03085 | 0.998 | 0.808 | 1.83E-06 | Plasma cel | CD74     |
| 5054 | SCAF4     | 1.01E-10 | -0.31662 | 0.287 | 0.147 | 1.89E-06 | Plasma cel | SCAF4    |
| 5055 | ATP1A1    | 1.10E-10 | -0.41758 | 0.555 | 0.281 | 2.06E-06 | Plasma cel | ATP1A1   |
| 5056 | LYZ.1     | 1.18E-10 | -2.34475 | 0.046 | 0.133 | 2.22E-06 | Plasma cel | LYZ      |
| 5057 | SERINC5   | 1.20E-10 | -0.37235 | 0.03  | 0.113 | 2.26E-06 | Plasma cel | SERINC5  |
| 5058 | SNRPD2.2  | 1.21E-10 | -0.3068  | 0.97  | 0.842 | 2.28E-06 | Plasma cel | SNRPD2   |
| 5059 | TGOLN2.1  | 1.30E-10 | -0.42163 | 0.475 | 0.245 | 2.44E-06 | Plasma cel | TGOLN2   |
| 5060 | ETS1.2    | 1.57E-10 | -0.95443 | 0.323 | 0.348 | 2.96E-06 | Plasma cel | ETS1     |
| 5061 | PRRC2B    | 1.67E-10 | -0.31063 | 0.282 | 0.145 | 3.13E-06 | Plasma cel | PRRC2B   |
| 5062 | HCK.1     | 1.75E-10 | -0.68053 | 0.05  | 0.136 | 3.29E-06 | Plasma cel | HCK      |
| 5063 | NIPSNAP1. | 1.77E-10 | -0.28748 | 0.273 | 0.141 | 3.33E-06 | Plasma cel | NIPSNAP1 |
| 5064 | PCMTD1    | 2.16E-10 | -0.39344 | 0.381 | 0.199 | 4.06E-06 | Plasma cel | PCMTD1   |
| 5065 | MAP3K1.1  | 2.35E-10 | -0.25133 | 0.22  | 0.111 | 4.42E-06 | Plasma cel | MAP3K1   |
| 5066 | SELENOH.1 | 2.39E-10 | -0.41792 | 0.945 | 0.714 | 4.49E-06 | Plasma cel | SELENOH  |
| 5067 | RAD21.1   | 2.62E-10 | -0.28143 | 0.674 | 0.347 | 4.92E-06 | Plasma cel | RAD21    |
| 5068 | GNB2.1    | 2.82E-10 | -0.30258 | 0.814 | 0.402 | 5.29E-06 | Plasma cel | GNB2     |
| 5069 | UBE2D2.1  | 2.94E-10 | -0.36369 | 0.945 | 0.719 | 5.52E-06 | Plasma cel | UBE2D2   |
| 5070 | GMPS      | 3.02E-10 | -0.27517 | 0.309 | 0.162 | 5.67E-06 | Plasma cel | GMPS     |
| 5071 | GAPT      | 3.12E-10 | -0.45288 | 0.025 | 0.103 | 5.86E-06 | Plasma cel | GAPT     |
| 5072 | RARRES3.1 | 3.13E-10 | -0.77753 | 0.668 | 0.554 | 5.87E-06 | Plasma cel | RARRES3  |
| 5073 | CCDC66.1  | 3.15E-10 | -0.25827 | 0.227 | 0.115 | 5.91E-06 | Plasma cel | CCDC66   |
| 5074 | BEX3.2    | 3.51E-10 | -0.64829 | 0.098 | 0.183 | 6.60E-06 | Plasma cel | BEX3     |
| 5075 | OTULINL.1 | 3.71E-10 | -0.34876 | 0.034 | 0.114 | 6.97E-06 | Plasma cel | OTULINL  |
| 5076 | M6PR      | 3.71E-10 | -0.34065 | 0.745 | 0.366 | 6.97E-06 | Plasma cel | M6PR     |
| 5077 | HOPX.2    | 3.74E-10 | -0.90474 | 0.032 | 0.112 | 7.03E-06 | Plasma cel | HOPX     |
| 5078 | BLK.2     | 4.02E-10 | -0.40877 | 0.261 | 0.136 | 7.55E-06 | Plasma cel | BLK      |
| 5079 | GPBP1.1   | 4.17E-10 | -0.44349 | 0.697 | 0.343 | 7.83E-06 | Plasma cel | GPBP1    |
| 5080 | PHF14     | 4.19E-10 | -0.3155  | 0.289 | 0.151 | 7.86E-06 | Plasma cel | PHF14    |
| 5081 | MACF1     | 4.60E-10 | -0.34359 | 0.34  | 0.18  | 8.65E-06 | Plasma cel | MACF1    |
| 5082 | ID2       | 4.92E-10 | -0.47267 | 0.046 | 0.128 | 9.25E-06 | Plasma cel | ID2      |



|      |           |          |          |       |       |          |                     |
|------|-----------|----------|----------|-------|-------|----------|---------------------|
| 5083 | CA5B      | 5.70E-10 | -0.27812 | 0.246 | 0.128 | 1.07E-05 | Plasma cel CA5B     |
| 5084 | OAZ1.2    | 5.72E-10 | -0.45245 | 0.98  | 0.938 | 1.07E-05 | Plasma cel OAZ1     |
| 5085 | NSD3.1    | 5.95E-10 | -0.45846 | 0.661 | 0.329 | 1.12E-05 | Plasma cel NSD3     |
| 5086 | ARHGEF2   | 6.41E-10 | -0.30604 | 0.273 | 0.143 | 1.20E-05 | Plasma cel ARHGEF2  |
| 5087 | CXCR4.2   | 6.95E-10 | -1.08502 | 0.294 | 0.327 | 1.31E-05 | Plasma cel CXCR4    |
| 5088 | ADD3.2    | 7.01E-10 | -0.90503 | 0.651 | 0.49  | 1.32E-05 | Plasma cel ADD3     |
| 5089 | OXNAD1.2  | 7.11E-10 | -0.81351 | 0.176 | 0.247 | 1.34E-05 | Plasma cel OXNAD1   |
| 5090 | CYLD.1    | 7.32E-10 | -0.45486 | 0.475 | 0.248 | 1.38E-05 | Plasma cel CYLD     |
| 5091 | NFATC3    | 7.54E-10 | -0.33565 | 0.294 | 0.155 | 1.42E-05 | Plasma cel NFATC3   |
| 5092 | LAIR1     | 8.18E-10 | -0.67161 | 0.135 | 0.214 | 1.54E-05 | Plasma cel LAIR1    |
| 5093 | CBLB.1    | 9.69E-10 | -0.48979 | 0.066 | 0.148 | 1.82E-05 | Plasma cel CBLB     |
| 5094 | IVNS1ABP  | 9.93E-10 | -0.3768  | 0.319 | 0.169 | 1.87E-05 | Plasma cel IVNS1ABP |
| 5095 | TRIM38    | 1.08E-09 | -0.28728 | 0.255 | 0.134 | 2.02E-05 | Plasma cel TRIM38   |
| 5096 | STAT3     | 1.14E-09 | -0.4601  | 0.555 | 0.285 | 2.14E-05 | Plasma cel STAT3    |
| 5097 | GPBP1L1   | 1.19E-09 | -0.2763  | 0.25  | 0.131 | 2.24E-05 | Plasma cel GPBP1L1  |
| 5098 | EMB       | 1.33E-09 | -0.43175 | 0.402 | 0.212 | 2.50E-05 | Plasma cel EMB      |
| 5099 | SMPD1.1   | 1.37E-09 | -0.31926 | 0.257 | 0.135 | 2.56E-05 | Plasma cel SMPD1    |
| 5100 | PPP1R18   | 1.39E-09 | -0.99177 | 0.619 | 0.473 | 2.61E-05 | Plasma cel PPP1R18  |
| 5101 | VPS4B     | 1.47E-09 | -0.40056 | 0.408 | 0.216 | 2.76E-05 | Plasma cel VPS4B    |
| 5102 | LGALS9.2  | 1.59E-09 | -0.4856  | 0.064 | 0.145 | 2.99E-05 | Plasma cel LGALS9   |
| 5103 | CHD1      | 1.61E-09 | -0.37727 | 0.339 | 0.18  | 3.03E-05 | Plasma cel CHD1     |
| 5104 | PNISR.1   | 1.64E-09 | -0.77741 | 0.824 | 0.552 | 3.08E-05 | Plasma cel PNISR    |
| 5105 | MBNL1.1   | 1.76E-09 | -0.90786 | 0.612 | 0.475 | 3.31E-05 | Plasma cel MBNL1    |
| 5106 | ZNF148    | 1.85E-09 | -0.33233 | 0.301 | 0.16  | 3.47E-05 | Plasma cel ZNF148   |
| 5107 | HLA-DMA   | 2.15E-09 | -0.95918 | 0.676 | 0.341 | 4.04E-05 | Plasma cel HLA-DMA  |
| 5108 | BORCS7    | 2.23E-09 | -0.25129 | 0.238 | 0.125 | 4.19E-05 | Plasma cel BORCS7   |
| 5109 | S100A4.2  | 2.27E-09 | -2.02279 | 0.621 | 0.538 | 4.26E-05 | Plasma cel S100A4   |
| 5110 | ZNF524    | 2.37E-09 | -0.3591  | 0.344 | 0.185 | 4.45E-05 | Plasma cel ZNF524   |
| 5111 | RASGRP2.2 | 2.42E-09 | -0.67967 | 0.635 | 0.524 | 4.55E-05 | Plasma cel RASGRP2  |
| 5112 | OXLD1.1   | 2.63E-09 | -0.437   | 0.491 | 0.258 | 4.94E-05 | Plasma cel OXLD1    |
| 5113 | UBE2D1.1  | 2.64E-09 | -0.39034 | 0.358 | 0.191 | 4.95E-05 | Plasma cel UBE2D1   |
| 5114 | LYST.1    | 2.79E-09 | -0.60016 | 0.087 | 0.167 | 5.24E-05 | Plasma cel LYST     |
| 5115 | NDE1      | 2.83E-09 | -0.28455 | 0.254 | 0.134 | 5.32E-05 | Plasma cel NDE1     |
| 5116 | ULK3.1    | 2.89E-09 | -0.30563 | 0.259 | 0.137 | 5.44E-05 | Plasma cel ULK3     |
| 5117 | CLK1.1    | 3.14E-09 | -0.42566 | 0.372 | 0.2   | 5.90E-05 | Plasma cel CLK1     |
| 5118 | CMTM3     | 3.26E-09 | -0.41809 | 0.055 | 0.133 | 6.12E-05 | Plasma cel CMTM3    |
| 5119 | ZMYM2     | 3.30E-09 | -0.26776 | 0.232 | 0.122 | 6.19E-05 | Plasma cel ZMYM2    |
| 5120 | CAMLG.1   | 3.47E-09 | -0.42583 | 0.461 | 0.244 | 6.52E-05 | Plasma cel CAMLG    |
| 5121 | WBP2      | 3.78E-09 | -0.47258 | 0.539 | 0.279 | 7.10E-05 | Plasma cel WBP2     |
| 5122 | ARHGEF6   | 4.16E-09 | -0.28309 | 0.254 | 0.135 | 7.82E-05 | Plasma cel ARHGEF6  |
| 5123 | TAGAP.2   | 4.56E-09 | -1.03692 | 0.457 | 0.407 | 8.56E-05 | Plasma cel TAGAP    |
| 5124 | SPG11     | 4.62E-09 | -0.25552 | 0.218 | 0.114 | 8.68E-05 | Plasma cel SPG11    |
| 5125 | YPEL5     | 4.76E-09 | -0.45072 | 0.486 | 0.255 | 8.94E-05 | Plasma cel YPEL5    |
| 5126 | CNOT7.1   | 4.78E-09 | -0.3647  | 0.718 | 0.359 | 8.97E-05 | Plasma cel CNOT7    |
| 5127 | NSA2.1    | 5.03E-09 | -0.85769 | 0.736 | 0.52  | 9.46E-05 | Plasma cel NSA2     |
| 5128 | S100A8.1  | 5.05E-09 | -4.68949 | 0.167 | 0.24  | 9.49E-05 | Plasma cel S100A8   |
| 5129 | SLC44A2.1 | 5.35E-09 | -0.85332 | 0.319 | 0.335 | 0.000101 | Plasma cel SLC44A2  |

|      |           |          |          |       |       |          |                     |
|------|-----------|----------|----------|-------|-------|----------|---------------------|
| 5130 | PGLS.1    | 5.71E-09 | -0.97035 | 0.585 | 0.458 | 0.000107 | Plasma cel PGLS     |
| 5131 | CCS       | 6.23E-09 | -0.507   | 0.548 | 0.284 | 0.000117 | Plasma cel CCS      |
| 5132 | CLIC3.1   | 6.47E-09 | -0.97322 | 0.035 | 0.108 | 0.000122 | Plasma cel CLIC3    |
| 5133 | MANBA.1   | 6.91E-09 | -0.28438 | 0.23  | 0.122 | 0.00013  | Plasma cel MANBA    |
| 5134 | DCXR.1    | 7.14E-09 | -0.27441 | 0.817 | 0.412 | 0.000134 | Plasma cel DCXR     |
| 5135 | STAT6.1   | 7.81E-09 | -0.58558 | 0.126 | 0.2   | 0.000147 | Plasma cel STAT6    |
| 5136 | BLOC1S4.1 | 7.83E-09 | -0.32154 | 0.271 | 0.146 | 0.000147 | Plasma cel BLOC1S4  |
| 5137 | BBX.1     | 8.34E-09 | -0.40023 | 0.324 | 0.175 | 0.000157 | Plasma cel BBX      |
| 5138 | FGD3      | 8.96E-09 | -0.73751 | 0.23  | 0.28  | 0.000168 | Plasma cel FGD3     |
| 5139 | TFDP2.2   | 9.63E-09 | -0.26697 | 0.2   | 0.105 | 0.000181 | Plasma cel TFDP2    |
| 5140 | POLM      | 1.35E-08 | -0.27794 | 0.229 | 0.122 | 0.000253 | Plasma cel POLM     |
| 5141 | CTSD.1    | 1.35E-08 | -0.40484 | 0.22  | 0.117 | 0.000255 | Plasma cel CTSD     |
| 5142 | TNFAIP8.2 | 1.58E-08 | -0.88112 | 0.661 | 0.491 | 0.000297 | Plasma cel TNFAIP8  |
| 5143 | BRI3.1    | 1.66E-08 | -0.33568 | 0.23  | 0.123 | 0.000313 | Plasma cel BRI3     |
| 5144 | TBRG1     | 1.70E-08 | -0.47548 | 0.539 | 0.282 | 0.00032  | Plasma cel TBRG1    |
| 5145 | GRK2.1    | 1.82E-08 | -0.38099 | 0.33  | 0.181 | 0.000342 | Plasma cel GRK2     |
| 5146 | FCER1G.1  | 2.00E-08 | -2.04177 | 0.154 | 0.222 | 0.000375 | Plasma cel FCER1G   |
| 5147 | UXT.1     | 2.17E-08 | -0.44152 | 0.918 | 0.654 | 0.000407 | Plasma cel UXT      |
| 5148 | KLF6.2    | 2.27E-08 | -0.91483 | 0.291 | 0.32  | 0.000426 | Plasma cel KLF6     |
| 5149 | TNRC6B    | 2.28E-08 | -0.43226 | 0.401 | 0.218 | 0.000427 | Plasma cel TNRC6B   |
| 5150 | FDFT1.2   | 2.31E-08 | -0.36467 | 0.736 | 0.374 | 0.000434 | Plasma cel FDFT1    |
| 5151 | CD40.2    | 2.51E-08 | -0.47748 | 0.278 | 0.152 | 0.000471 | Plasma cel CD40     |
| 5152 | NGRN.1    | 2.55E-08 | -0.41153 | 0.374 | 0.203 | 0.000479 | Plasma cel NGRN     |
| 5153 | SH3BP1    | 2.58E-08 | -0.3702  | 0.348 | 0.19  | 0.000484 | Plasma cel SH3BP1   |
| 5154 | UXS1      | 3.36E-08 | -0.30455 | 0.245 | 0.133 | 0.000631 | Plasma cel UXS1     |
| 5155 | S100A9.1  | 3.59E-08 | -4.22369 | 0.158 | 0.225 | 0.000675 | Plasma cel S100A9   |
| 5156 | FCRLA.2   | 3.69E-08 | -0.64648 | 0.316 | 0.174 | 0.000694 | Plasma cel FCRLA    |
| 5157 | RHOC.1    | 4.29E-08 | -0.45999 | 0.041 | 0.109 | 0.000806 | Plasma cel RHOC     |
| 5158 | HLA-DRB1. | 4.47E-08 | -1.64022 | 0.869 | 0.427 | 0.00084  | Plasma cel HLA-DRB1 |
| 5159 | WASHC4    | 4.67E-08 | -0.44019 | 0.358 | 0.197 | 0.000877 | Plasma cel WASHC4   |
| 5160 | TMOD3.1   | 4.68E-08 | -0.4295  | 0.45  | 0.244 | 0.000879 | Plasma cel TMOD3    |
| 5161 | LSM14A.1  | 4.94E-08 | -0.43552 | 0.7   | 0.354 | 0.000927 | Plasma cel LSM14A   |
| 5162 | TGFBR2.1  | 5.05E-08 | -0.70642 | 0.197 | 0.25  | 0.000948 | Plasma cel TGFBR2   |
| 5163 | VPS13C    | 5.12E-08 | -0.43852 | 0.374 | 0.205 | 0.000962 | Plasma cel VPS13C   |
| 5164 | FERMT3.1  | 5.16E-08 | -0.45392 | 0.729 | 0.367 | 0.00097  | Plasma cel FERMT3   |
| 5165 | EPSTI1.1  | 5.18E-08 | -0.28439 | 0.246 | 0.135 | 0.000974 | Plasma cel EPSTI1   |
| 5166 | RPS4Y1    | 5.34E-08 | -1.56695 | 0.559 | 0.447 | 0.001004 | Plasma cel RPS4Y1   |
| 5167 | PPP1R12A  | 5.68E-08 | -0.47726 | 0.543 | 0.287 | 0.001066 | Plasma cel PPP1R12A |
| 5168 | STMP1.2   | 5.89E-08 | -0.41786 | 0.723 | 0.364 | 0.001107 | Plasma cel STMP1    |
| 5169 | LEPROTL1. | 5.96E-08 | -1.06246 | 0.716 | 0.499 | 0.00112  | Plasma cel LEPROTL1 |
| 5170 | CTDSP1.1  | 6.04E-08 | -0.37184 | 0.321 | 0.177 | 0.001135 | Plasma cel CTDSP1   |
| 5171 | RSL1D1.2  | 6.89E-08 | -0.68284 | 0.81  | 0.552 | 0.001295 | Plasma cel RSL1D1   |
| 5172 | C19orf70  | 6.94E-08 | -0.28623 | 0.837 | 0.418 | 0.001303 | Plasma cel C19orf70 |
| 5173 | MYO1G.1   | 6.95E-08 | -0.49204 | 0.493 | 0.267 | 0.001305 | Plasma cel MYO1G    |
| 5174 | RBL2.2    | 7.24E-08 | -0.94805 | 0.431 | 0.385 | 0.00136  | Plasma cel RBL2     |
| 5175 | STX4      | 7.44E-08 | -0.28377 | 0.236 | 0.129 | 0.001398 | Plasma cel STX4     |
| 5176 | HIST1H4C. | 7.64E-08 | 1.485281 | 0.86  | 0.635 | 0.001436 | Plasma cel HIST1H4C |

|      |           |          |          |       |       |          |                         |
|------|-----------|----------|----------|-------|-------|----------|-------------------------|
| 5177 | NAAA.1    | 7.67E-08 | -0.41408 | 0.34  | 0.188 | 0.001442 | Plasma cel NAAA         |
| 5178 | MCUB.2    | 7.75E-08 | -0.77283 | 0.711 | 0.513 | 0.001457 | Plasma cel MCUB         |
| 5179 | MED10.1   | 9.52E-08 | -0.3875  | 0.706 | 0.359 | 0.001788 | Plasma cel MED10        |
| 5180 | ARID4A    | 9.55E-08 | -0.33024 | 0.266 | 0.147 | 0.001794 | Plasma cel ARID4A       |
| 5181 | P2RY8.1   | 9.77E-08 | -0.46207 | 0.365 | 0.201 | 0.001836 | Plasma cel P2RY8        |
| 5182 | KRCC1     | 1.07E-07 | -0.35219 | 0.307 | 0.171 | 0.002008 | Plasma cel KRCC1        |
| 5183 | BLOC1S2   | 1.14E-07 | -0.53471 | 0.535 | 0.284 | 0.002138 | Plasma cel BLOC1S2      |
| 5184 | LASP1.1   | 1.15E-07 | -0.33776 | 0.277 | 0.153 | 0.002158 | Plasma cel LASP1        |
| 5185 | PARP14.1  | 1.23E-07 | -0.26391 | 0.202 | 0.11  | 0.002309 | Plasma cel PARP14       |
| 5186 | TRAC.2    | 1.30E-07 | -0.89945 | 0.246 | 0.281 | 0.002444 | Plasma cel TRAC         |
| 5187 | DNAJB6.1  | 1.35E-07 | -0.48564 | 0.527 | 0.282 | 0.002535 | Plasma cel DNAJB6       |
| 5188 | GOLGA7    | 1.40E-07 | -0.48329 | 0.516 | 0.276 | 0.002628 | Plasma cel GOLGA7       |
| 5189 | IRF8      | 1.67E-07 | -0.73884 | 0.103 | 0.169 | 0.003136 | Plasma cel IRF8         |
| 5190 | SSU72     | 1.81E-07 | -0.27054 | 0.851 | 0.434 | 0.003395 | Plasma cel SSU72        |
| 5191 | RASA3.2   | 1.84E-07 | -0.41836 | 0.36  | 0.201 | 0.003462 | Plasma cel RASA3        |
| 5192 | KLHL24    | 1.85E-07 | -0.2762  | 0.222 | 0.122 | 0.003475 | Plasma cel KLHL24       |
| 5193 | CIB1.1    | 1.92E-07 | -0.83075 | 0.739 | 0.514 | 0.00361  | Plasma cel CIB1         |
| 5194 | CCDC107.1 | 2.22E-07 | -0.5043  | 0.512 | 0.277 | 0.004169 | Plasma cel CCDC107      |
| 5195 | CBLL1.1   | 2.24E-07 | -0.32789 | 0.25  | 0.139 | 0.004203 | Plasma cel CBLL1        |
| 5196 | FAM208A   | 2.24E-07 | -0.34356 | 0.264 | 0.148 | 0.00421  | Plasma cel FAM208A      |
| 5197 | MFNG.1    | 2.26E-07 | -0.46203 | 0.624 | 0.327 | 0.004244 | Plasma cel MFNG         |
| 5198 | DGUOK     | 2.28E-07 | -0.30954 | 0.793 | 0.406 | 0.004277 | Plasma cel DGUOK        |
| 5199 | ARL2.1    | 2.32E-07 | -0.30677 | 0.246 | 0.137 | 0.004353 | Plasma cel ARL2         |
| 5200 | BNIP3.1   | 2.48E-07 | -0.36381 | 0.305 | 0.171 | 0.004655 | Plasma cel BNIP3        |
| 5201 | SPINT2.1  | 2.59E-07 | -0.37204 | 0.472 | 0.263 | 0.004858 | Plasma cel SPINT2       |
| 5202 | RBMX.2    | 2.78E-07 | -0.38246 | 0.683 | 0.358 | 0.005222 | Plasma cel RBMX         |
| 5203 | CDC40     | 2.84E-07 | -0.42594 | 0.385 | 0.214 | 0.005343 | Plasma cel CDC40        |
| 5204 | METTL26.1 | 2.85E-07 | -0.27103 | 0.819 | 0.418 | 0.005351 | Plasma cel METTL26      |
| 5205 | RNF44     | 2.93E-07 | -0.57483 | 0.138 | 0.199 | 0.005495 | Plasma cel RNF44        |
| 5206 | AP002387. | 2.95E-07 | -0.2672  | 0.202 | 0.111 | 0.005538 | Plasma cel AP002387.2   |
| 5207 | CD28.1    | 2.97E-07 | -0.35359 | 0.044 | 0.107 | 0.005574 | Plasma cel CD28         |
| 5208 | VASP.1    | 3.16E-07 | -0.46986 | 0.399 | 0.221 | 0.005939 | Plasma cel VASP         |
| 5209 | EMP3.2    | 3.78E-07 | -0.46453 | 0.979 | 0.787 | 0.007095 | Plasma cel EMP3         |
| 5210 | PTBP3     | 3.85E-07 | -0.39965 | 0.326 | 0.184 | 0.007228 | Plasma cel PTBP3        |
| 5211 | HLA-DOB.1 | 3.87E-07 | -0.55914 | 0.06  | 0.124 | 0.007266 | Plasma cel HLA-DOB      |
| 5212 | PLCG1.1   | 4.01E-07 | -0.34498 | 0.043 | 0.104 | 0.007529 | Plasma cel PLCG1        |
| 5213 | PPIG      | 4.18E-07 | -0.37076 | 0.729 | 0.376 | 0.007858 | Plasma cel PPIG         |
| 5214 | TIMP1.1   | 4.31E-07 | -1.13499 | 0.184 | 0.237 | 0.008089 | Plasma cel TIMP1        |
| 5215 | DPEP2     | 4.32E-07 | -0.45313 | 0.085 | 0.15  | 0.008122 | Plasma cel DPEP2        |
| 5216 | UBE2D3.1  | 4.58E-07 | -0.34497 | 0.926 | 0.684 | 0.008607 | Plasma cel UBE2D3       |
| 5217 | TUBA4A.2  | 4.63E-07 | -0.25063 | 0.727 | 0.406 | 0.008692 | Plasma cel TUBA4A       |
| 5218 | SWAP70.1  | 4.80E-07 | -0.51385 | 0.298 | 0.168 | 0.009017 | Plasma cel SWAP70       |
| 5219 | SP140L.1  | 5.31E-07 | -0.42029 | 0.344 | 0.194 | 0.009979 | Plasma cel SP140L       |
| 5220 | SQSTM1    | 5.35E-07 | -0.28237 | 0.849 | 0.436 | 0.010058 | Plasma cel SQSTM1       |
| 5221 | N4BP2L2.1 | 5.40E-07 | -0.86131 | 0.67  | 0.484 | 0.010152 | Plasma cel N4BP2L2      |
| 5222 | STAT4.1   | 5.59E-07 | -0.42591 | 0.059 | 0.121 | 0.010499 | Plasma cel STAT4        |
| 5223 | EPB41L4A- | 5.98E-07 | -0.37764 | 0.31  | 0.176 | 0.011233 | Plasma cel EPB41L4A-AS1 |

|      |            |          |          |       |       |          |            |            |
|------|------------|----------|----------|-------|-------|----------|------------|------------|
| 5224 | HERC1      | 6.08E-07 | -0.30679 | 0.236 | 0.133 | 0.011427 | Plasma cel | HERC1      |
| 5225 | CREB1      | 6.54E-07 | -0.35293 | 0.293 | 0.166 | 0.012284 | Plasma cel | CREB1      |
| 5226 | IGBP1.1    | 6.67E-07 | -0.45036 | 0.741 | 0.376 | 0.012535 | Plasma cel | IGBP1      |
| 5227 | GBP1.1     | 6.73E-07 | -0.42672 | 0.067 | 0.129 | 0.012644 | Plasma cel | GBP1       |
| 5228 | ZNF428.2   | 6.90E-07 | -0.51778 | 0.613 | 0.323 | 0.01296  | Plasma cel | ZNF428     |
| 5229 | EIF3D.2    | 7.04E-07 | -0.59438 | 0.844 | 0.556 | 0.013232 | Plasma cel | EIF3D      |
| 5230 | PDCD4.1    | 7.54E-07 | -0.88216 | 0.461 | 0.395 | 0.014169 | Plasma cel | PDCD4      |
| 5231 | RHOH.2     | 7.69E-07 | -0.9948  | 0.622 | 0.457 | 0.014446 | Plasma cel | RHOH       |
| 5232 | SMIM29     | 7.77E-07 | -0.39333 | 0.314 | 0.179 | 0.0146   | Plasma cel | SMIM29     |
| 5233 | SIT1.2     | 7.82E-07 | -0.50583 | 0.452 | 0.251 | 0.014694 | Plasma cel | SIT1       |
| 5234 | SLC2A3.2   | 7.85E-07 | -0.72045 | 0.172 | 0.223 | 0.01474  | Plasma cel | SLC2A3     |
| 5235 | SMDT1.1    | 8.97E-07 | -0.37655 | 0.961 | 0.678 | 0.016854 | Plasma cel | SMDT1      |
| 5236 | GPR65.1    | 9.09E-07 | -0.59553 | 0.129 | 0.187 | 0.017079 | Plasma cel | GPR65      |
| 5237 | SCAF11     | 9.13E-07 | -0.52228 | 0.583 | 0.311 | 0.017158 | Plasma cel | SCAF11     |
| 5238 | MBP        | 9.54E-07 | -0.84561 | 0.3   | 0.307 | 0.017927 | Plasma cel | MBP        |
| 5239 | CSK.1      | 9.71E-07 | -0.76206 | 0.69  | 0.499 | 0.018241 | Plasma cel | CSK        |
| 5240 | ESD.1      | 9.86E-07 | -0.43472 | 0.491 | 0.271 | 0.018527 | Plasma cel | ESD        |
| 5241 | AKTIP.1    | 1.00E-06 | -0.28168 | 0.2   | 0.112 | 0.018776 | Plasma cel | AKTIP      |
| 5242 | HBB.1      | 1.03E-06 | -1.2498  | 0.154 | 0.086 | 0.019431 | Plasma cel | HBB        |
| 5243 | DUSP1.1    | 1.04E-06 | -1.35953 | 0.186 | 0.232 | 0.019591 | Plasma cel | DUSP1      |
| 5244 | MGST3.2    | 1.05E-06 | -0.43489 | 0.44  | 0.246 | 0.019762 | Plasma cel | MGST3      |
| 5245 | EBLN3P.1   | 1.06E-06 | -0.48001 | 0.394 | 0.222 | 0.019868 | Plasma cel | EBLN3P     |
| 5246 | PARP8.1    | 1.06E-06 | -0.50575 | 0.096 | 0.156 | 0.019902 | Plasma cel | PARP8      |
| 5247 | LAT2.1     | 1.17E-06 | -0.58861 | 0.376 | 0.214 | 0.021986 | Plasma cel | LAT2       |
| 5248 | EIF1B.1    | 1.19E-06 | -0.46285 | 0.718 | 0.368 | 0.022315 | Plasma cel | EIF1B      |
| 5249 | TSTD1.1    | 1.30E-06 | -0.82511 | 0.78  | 0.52  | 0.024394 | Plasma cel | TSTD1      |
| 5250 | SUSD3.2    | 1.34E-06 | -0.49422 | 0.408 | 0.229 | 0.025083 | Plasma cel | SUSD3      |
| 5251 | CDC37      | 1.48E-06 | -0.48237 | 0.89  | 0.593 | 0.027742 | Plasma cel | CDC37      |
| 5252 | GCA.1      | 1.48E-06 | -0.78033 | 0.355 | 0.201 | 0.027788 | Plasma cel | GCA        |
| 5253 | ANKZF1     | 1.54E-06 | -0.28529 | 0.213 | 0.121 | 0.02892  | Plasma cel | ANKZF1     |
| 5254 | SRSF11.1   | 1.57E-06 | -0.33616 | 0.8   | 0.416 | 0.029514 | Plasma cel | SRSF11     |
| 5255 | STX10.1    | 1.61E-06 | -0.50724 | 0.468 | 0.259 | 0.030304 | Plasma cel | STX10      |
| 5256 | MSL3       | 1.65E-06 | -0.40098 | 0.349 | 0.2   | 0.031044 | Plasma cel | MSL3       |
| 5257 | NUMA1      | 1.83E-06 | -0.32185 | 0.246 | 0.141 | 0.034435 | Plasma cel | NUMA1      |
| 5258 | RSRP1      | 1.86E-06 | -0.83273 | 0.66  | 0.476 | 0.034857 | Plasma cel | RSRP1      |
| 5259 | BLVRB.1    | 1.95E-06 | -0.45845 | 0.236 | 0.135 | 0.036584 | Plasma cel | BLVRB      |
| 5260 | HPCAL1     | 2.07E-06 | -0.45205 | 0.479 | 0.266 | 0.038802 | Plasma cel | HPCAL1     |
| 5261 | AP1G2.1    | 2.18E-06 | -0.4818  | 0.445 | 0.249 | 0.040959 | Plasma cel | AP1G2      |
| 5262 | TRIR       | 2.23E-06 | -0.57964 | 0.842 | 0.565 | 0.04193  | Plasma cel | TRIR       |
| 5263 | MFSD10     | 2.29E-06 | -0.53685 | 0.514 | 0.281 | 0.042985 | Plasma cel | MFSD10     |
| 5264 | VAMP2.1    | 2.31E-06 | -0.91611 | 0.493 | 0.403 | 0.043314 | Plasma cel | VAMP2      |
| 5265 | SDR39U1.1  | 2.31E-06 | -0.53651 | 0.603 | 0.321 | 0.043366 | Plasma cel | SDR39U1    |
| 5266 | SMG1       | 2.43E-06 | -0.42295 | 0.348 | 0.2   | 0.045573 | Plasma cel | SMG1       |
| 5267 | KAT6A      | 2.43E-06 | -0.25481 | 0.193 | 0.11  | 0.045682 | Plasma cel | KAT6A      |
| 5268 | GABPB1-AS1 | 2.44E-06 | -0.38832 | 0.305 | 0.177 | 0.045804 | Plasma cel | GABPB1-AS1 |
| 5269 | UVRAG      | 2.44E-06 | -0.42698 | 0.316 | 0.182 | 0.045885 | Plasma cel | UVRAG      |
| 5270 | S1PR1.2    | 2.52E-06 | -0.91929 | 0.434 | 0.375 | 0.047252 | Plasma cel | S1PR1      |

|      |            |          |          |       |       |          |            |           |
|------|------------|----------|----------|-------|-------|----------|------------|-----------|
| 5271 | STXBP2.1   | 2.54E-06 | -1.1132  | 0.319 | 0.185 | 0.047767 | Plasma cel | STXBP2    |
| 5272 | VSIR.1     | 2.57E-06 | -0.56738 | 0.78  | 0.399 | 0.048295 | Plasma cel | VSIR      |
| 5527 | MS4A1.3    | 0        | 4.108237 | 0.973 | 0.027 |          | 0 B cells  | MS4A1     |
| 5528 | CD74.3     | 0        | 4.10443  | 1     | 0.745 |          | 0 B cells  | CD74      |
| 5529 | HLA-DRA.2  | 0        | 3.884496 | 0.999 | 0.196 |          | 0 B cells  | HLA-DRA   |
| 5530 | CD79A.2    | 0        | 3.775909 | 0.979 | 0.074 |          | 0 B cells  | CD79A     |
| 5531 | TCL1A.3    | 0        | 3.5872   | 0.735 | 0.021 |          | 0 B cells  | TCL1A     |
| 5532 | HLA-DRB5.  | 0        | 3.148013 | 0.935 | 0.204 |          | 0 B cells  | HLA-DRB5  |
| 5533 | HLA-DPB1   | 0        | 3.10805  | 0.985 | 0.269 |          | 0 B cells  | HLA-DPB1  |
| 5534 | HLA-DPA1.  | 0        | 3.106179 | 0.992 | 0.275 |          | 0 B cells  | HLA-DPA1  |
| 5535 | HLA-DRB1.  | 0        | 3.052601 | 0.994 | 0.237 |          | 0 B cells  | HLA-DRB1  |
| 5536 | HLA-DQA1   | 0        | 2.89908  | 0.879 | 0.068 |          | 0 B cells  | HLA-DQA1  |
| 5537 | HLA-DQA2   | 0        | 2.867324 | 0.651 | 0.062 |          | 0 B cells  | HLA-DQA2  |
| 5538 | HLA-DQB1   | 0        | 2.843734 | 0.896 | 0.091 |          | 0 B cells  | HLA-DQB1  |
| 5539 | CD79B.3    | 0        | 2.812785 | 0.873 | 0.113 |          | 0 B cells  | CD79B     |
| 5540 | VPREB3.3   | 0        | 2.566763 | 0.686 | 0.015 |          | 0 B cells  | VPREB3    |
| 5541 | BANK1.1    | 0        | 2.493762 | 0.752 | 0.02  |          | 0 B cells  | BANK1     |
| 5542 | IGHM.2     | 0        | 2.48239  | 0.845 | 0.055 |          | 0 B cells  | IGHM      |
| 5543 | CD37.2     | 0        | 2.467243 | 0.998 | 0.855 |          | 0 B cells  | CD37      |
| 5544 | HLA-DMA.   | 0        | 2.46696  | 0.881 | 0.158 |          | 0 B cells  | HLA-DMA   |
| 5545 | IGHV4-34.  | 0        | 2.466237 | 0.103 | 0.009 |          | 0 B cells  | IGHV4-34  |
| 5546 | LINC00926  | 0        | 2.366143 | 0.697 | 0.015 |          | 0 B cells  | LINC00926 |
| 5547 | HVCN1.3    | 0        | 2.305229 | 0.754 | 0.12  |          | 0 B cells  | HVCN1     |
| 5548 | FCER2.3    | 0        | 2.29686  | 0.602 | 0.013 |          | 0 B cells  | FCER2     |
| 5549 | CD19.3     | 0        | 2.283233 | 0.689 | 0.024 |          | 0 B cells  | CD19      |
| 5550 | FCRLA.3    | 0        | 2.189305 | 0.637 | 0.015 |          | 0 B cells  | FCRLA     |
| 5551 | FAM129C.   | 0        | 2.140342 | 0.632 | 0.015 |          | 0 B cells  | FAM129C   |
| 5552 | RALGPS2.2  | 0        | 2.075138 | 0.647 | 0.059 |          | 0 B cells  | RALGPS2   |
| 5553 | IGLC3.2    | 0        | 1.985561 | 0.327 | 0.016 |          | 0 B cells  | IGLC3     |
| 5554 | CD72.3     | 0        | 1.970323 | 0.54  | 0.022 |          | 0 B cells  | CD72      |
| 5555 | PLPP5.2    | 0        | 1.932578 | 0.574 | 0.086 |          | 0 B cells  | PLPP5     |
| 5556 | MEF2C.2    | 0        | 1.836652 | 0.577 | 0.084 |          | 0 B cells  | MEF2C     |
| 5557 | SNX2       | 0        | 1.772772 | 0.793 | 0.293 |          | 0 B cells  | SNX2      |
| 5558 | IGKV3-20.1 | 0        | 1.725238 | 0.11  | 0.023 |          | 0 B cells  | IGKV3-20  |
| 5559 | HLA-DMB.   | 0        | 1.70963  | 0.581 | 0.065 |          | 0 B cells  | HLA-DMB   |
| 5560 | IGHD.2     | 0        | 1.691388 | 0.458 | 0.014 |          | 0 B cells  | IGHD      |
| 5561 | NCF1.3     | 0        | 1.655144 | 0.889 | 0.344 |          | 0 B cells  | NCF1      |
| 5562 | CD40.3     | 0        | 1.640537 | 0.498 | 0.034 |          | 0 B cells  | CD40      |
| 5563 | CD24.2     | 0        | 1.62312  | 0.434 | 0.008 |          | 0 B cells  | CD24      |
| 5564 | CYB561A3.  | 0        | 1.605405 | 0.571 | 0.133 |          | 0 B cells  | CYB561A3  |
| 5565 | PDLIM1.2   | 0        | 1.598495 | 0.557 | 0.053 |          | 0 B cells  | PDLIM1    |
| 5566 | IGHV5-78.  | 0        | 1.598089 | 0.432 | 0.01  |          | 0 B cells  | IGHV5-78  |
| 5567 | BLK.3      | 0        | 1.592727 | 0.483 | 0.016 |          | 0 B cells  | BLK       |
| 5568 | HLA-DOB.2  | 0        | 1.53141  | 0.448 | 0.01  |          | 0 B cells  | HLA-DOB   |
| 5569 | SWAP70.2   | 0        | 1.527802 | 0.5   | 0.055 |          | 0 B cells  | SWAP70    |
| 5570 | IGLC2.2    | 0        | 1.471823 | 0.326 | 0.025 |          | 0 B cells  | IGLC2     |
| 5571 | FCRL1.1    | 0        | 1.470389 | 0.42  | 0.01  |          | 0 B cells  | FCRL1     |

|                 |   |          |       |       |           |           |
|-----------------|---|----------|-------|-------|-----------|-----------|
| 5572 IRF8.1     | 0 | 1.468139 | 0.479 | 0.06  | 0 B cells | IRF8      |
| 5573 RUBCNL.1   | 0 | 1.460829 | 0.44  | 0.02  | 0 B cells | RUBCNL    |
| 5574 CD22.2     | 0 | 1.433775 | 0.407 | 0.008 | 0 B cells | CD22      |
| 5575 SMIM14.2   | 0 | 1.425707 | 0.465 | 0.085 | 0 B cells | SMIM14    |
| 5576 IGLL5.1    | 0 | 1.415996 | 0.288 | 0.019 | 0 B cells | IGLL5     |
| 5577 TSPAN13.1  | 0 | 1.358891 | 0.384 | 0.02  | 0 B cells | TSPAN13   |
| 5578 BLNK.1     | 0 | 1.332536 | 0.397 | 0.021 | 0 B cells | BLNK      |
| 5579 NAPSA.3    | 0 | 1.328872 | 0.448 | 0.071 | 0 B cells | NAPSA     |
| 5580 IGHV3-23.1 | 0 | 1.319797 | 0.121 | 0.013 | 0 B cells | IGHV3-23  |
| 5581 EAF2.1     | 0 | 1.308052 | 0.425 | 0.071 | 0 B cells | EAF2      |
| 5582 SYNGR2.1   | 0 | 1.307905 | 0.775 | 0.423 | 0 B cells | SYNGR2    |
| 5583 FAM30A.3   | 0 | 1.307798 | 0.313 | 0.018 | 0 B cells | FAM30A    |
| 5584 LAT2.2     | 0 | 1.299389 | 0.503 | 0.115 | 0 B cells | LAT2      |
| 5585 IGKC.2     | 0 | 1.299305 | 0.476 | 0.05  | 0 B cells | IGKC      |
| 5586 CALHM6.2   | 0 | 1.287584 | 0.516 | 0.122 | 0 B cells | CALHM6    |
| 5587 CXCR4.3    | 0 | 1.28608  | 0.547 | 0.249 | 0 B cells | CXCR4     |
| 5588 STX7.1     | 0 | 1.281343 | 0.487 | 0.128 | 0 B cells | STX7      |
| 5589 PPP1R14A.1 | 0 | 1.281155 | 0.302 | 0.02  | 0 B cells | PPP1R14A  |
| 5590 SYPL1.3    | 0 | 1.257495 | 0.637 | 0.27  | 0 B cells | SYPL1     |
| 5591 TCF4.2     | 0 | 1.238322 | 0.38  | 0.036 | 0 B cells | TCF4      |
| 5592 PLD4.1     | 0 | 1.218582 | 0.337 | 0.023 | 0 B cells | PLD4      |
| 5593 HERPUD1.1  | 0 | 1.202362 | 0.574 | 0.278 | 0 B cells | HERPUD1   |
| 5594 LINC02397  | 0 | 1.198233 | 0.316 | 0.008 | 0 B cells | LINC02397 |
| 5595 BTK.1      | 0 | 1.195149 | 0.415 | 0.068 | 0 B cells | BTK       |
| 5596 AFF3.2     | 0 | 1.178195 | 0.358 | 0.032 | 0 B cells | AFF3      |
| 5597 EZR.1      | 0 | 1.148425 | 0.608 | 0.358 | 0 B cells | EZR       |
| 5598 PTPN6.2    | 0 | 1.137504 | 0.784 | 0.541 | 0 B cells | PTPN6     |
| 5599 POLD4.1    | 0 | 1.130086 | 0.751 | 0.478 | 0 B cells | POLD4     |
| 5600 ADAM28.1   | 0 | 1.122967 | 0.289 | 0.014 | 0 B cells | ADAM28    |
| 5601 TSPAN3.3   | 0 | 1.121128 | 0.447 | 0.124 | 0 B cells | TSPAN3    |
| 5602 LY86.2     | 0 | 1.109441 | 0.406 | 0.076 | 0 B cells | LY86      |
| 5603 FCMR.3     | 0 | 1.105683 | 0.788 | 0.503 | 0 B cells | FCMR      |
| 5604 CD180      | 0 | 1.103269 | 0.313 | 0.027 | 0 B cells | CD180     |
| 5605 CXXC5.3    | 0 | 1.099756 | 0.365 | 0.062 | 0 B cells | CXXC5     |
| 5606 GAPT.1     | 0 | 1.087198 | 0.309 | 0.03  | 0 B cells | GAPT      |
| 5607 ALOX5.3    | 0 | 1.081894 | 0.419 | 0.093 | 0 B cells | ALOX5     |
| 5608 SPIB       | 0 | 1.077812 | 0.293 | 0.008 | 0 B cells | SPIB      |
| 5609 SYK.1      | 0 | 1.07722  | 0.403 | 0.103 | 0 B cells | SYK       |
| 5610 CD52.3     | 0 | 1.06181  | 0.955 | 0.78  | 0 B cells | CD52      |
| 5611 BIRC3.1    | 0 | 1.057529 | 0.375 | 0.095 | 0 B cells | BIRC3     |
| 5612 BACH2.2    | 0 | 1.050038 | 0.386 | 0.137 | 0 B cells | BACH2     |
| 5613 CDCA7L.2   | 0 | 1.030192 | 0.373 | 0.09  | 0 B cells | CDCA7L    |
| 5614 LAPTM5.2   | 0 | 1.016265 | 0.94  | 0.846 | 0 B cells | LAPTM5    |
| 5615 RCSD1      | 0 | 1.009595 | 0.618 | 0.365 | 0 B cells | RCSD1     |
| 5616 POU2F2.2   | 0 | 1.003777 | 0.449 | 0.161 | 0 B cells | POU2F2    |
| 5617 FCGR2B.1   | 0 | 1.002639 | 0.297 | 0.033 | 0 B cells | FCGR2B    |
| 5618 HHEX.1     | 0 | 0.993237 | 0.315 | 0.047 | 0 B cells | HHEX      |

|                 |   |          |       |       |           |           |
|-----------------|---|----------|-------|-------|-----------|-----------|
| 5619 PKIG       | 0 | 0.987257 | 0.284 | 0.017 | 0 B cells | PKIG      |
| 5620 LYN.2      | 0 | 0.98305  | 0.487 | 0.149 | 0 B cells | LYN       |
| 5621 GNG7.2     | 0 | 0.97813  | 0.294 | 0.032 | 0 B cells | GNG7      |
| 5622 QRSL1.2    | 0 | 0.967    | 0.321 | 0.063 | 0 B cells | QRSL1     |
| 5623 CD82.1     | 0 | 0.965559 | 0.375 | 0.122 | 0 B cells | CD82      |
| 5624 ID3.2      | 0 | 0.96477  | 0.374 | 0.146 | 0 B cells | ID3       |
| 5625 POU2AF1.2  | 0 | 0.960822 | 0.296 | 0.025 | 0 B cells | POU2AF1   |
| 5626 PLEKHF2.2  | 0 | 0.958496 | 0.361 | 0.105 | 0 B cells | PLEKHF2   |
| 5627 BCL11A.1   | 0 | 0.955826 | 0.288 | 0.025 | 0 B cells | BCL11A    |
| 5628 PNOC       | 0 | 0.955697 | 0.261 | 0.016 | 0 B cells | PNOC      |
| 5629 RNASE6.1   | 0 | 0.936053 | 0.275 | 0.054 | 0 B cells | RNASE6    |
| 5630 PAX5       | 0 | 0.930621 | 0.252 | 0.006 | 0 B cells | PAX5      |
| 5631 IL4R.2     | 0 | 0.927555 | 0.32  | 0.155 | 0 B cells | IL4R      |
| 5632 IFNGR2.2   | 0 | 0.921463 | 0.561 | 0.245 | 0 B cells | IFNGR2    |
| 5633 SHMT2.2    | 0 | 0.921294 | 0.49  | 0.229 | 0 B cells | SHMT2     |
| 5634 TNFRSF13C  | 0 | 0.920323 | 0.256 | 0.009 | 0 B cells | TNFRSF13C |
| 5635 IGHG2.1    | 0 | 0.91997  | 0.2   | 0.009 | 0 B cells | IGHG2     |
| 5636 MARCH1.2   | 0 | 0.915634 | 0.303 | 0.058 | 0 B cells | Mar-01    |
| 5637 CCR6       | 0 | 0.904772 | 0.249 | 0.017 | 0 B cells | CCR6      |
| 5638 SNX3.1     | 0 | 0.899113 | 0.695 | 0.478 | 0 B cells | SNX3      |
| 5639 CD83       | 0 | 0.888592 | 0.218 | 0.023 | 0 B cells | CD83      |
| 5640 ORAI2      | 0 | 0.877944 | 0.31  | 0.075 | 0 B cells | ORAI2     |
| 5641 ADK.1      | 0 | 0.872771 | 0.357 | 0.16  | 0 B cells | ADK       |
| 5642 CXCR5      | 0 | 0.872158 | 0.237 | 0.01  | 0 B cells | CXCR5     |
| 5643 TPD52.2    | 0 | 0.866153 | 0.281 | 0.059 | 0 B cells | TPD52     |
| 5644 HLA-DOA    | 0 | 0.847649 | 0.237 | 0.017 | 0 B cells | HLA-DOA   |
| 5645 CIITA      | 0 | 0.835335 | 0.245 | 0.023 | 0 B cells | CIITA     |
| 5646 CD1C       | 0 | 0.835063 | 0.186 | 0.008 | 0 B cells | CD1C      |
| 5647 MTSS1.2    | 0 | 0.833825 | 0.32  | 0.09  | 0 B cells | MTSS1     |
| 5648 TLR10      | 0 | 0.822101 | 0.226 | 0.007 | 0 B cells | TLR10     |
| 5649 SNHG7.3    | 0 | 0.818762 | 0.41  | 0.223 | 0 B cells | SNHG7     |
| 5650 GGA2       | 0 | 0.808184 | 0.298 | 0.08  | 0 B cells | GGA2      |
| 5651 C16orf74.1 | 0 | 0.806556 | 0.251 | 0.058 | 0 B cells | C16orf74  |
| 5652 BTLA.1     | 0 | 0.80328  | 0.238 | 0.045 | 0 B cells | BTLA      |
| 5653 ZCCHC7.2   | 0 | 0.80228  | 0.377 | 0.164 | 0 B cells | ZCCHC7    |
| 5654 SP140.2    | 0 | 0.800907 | 0.31  | 0.095 | 0 B cells | SP140     |
| 5655 PARP1.2    | 0 | 0.7919   | 0.506 | 0.29  | 0 B cells | PARP1     |
| 5656 ZFP36L1.2  | 0 | 0.790126 | 0.68  | 0.49  | 0 B cells | ZFP36L1   |
| 5657 LTB.3      | 0 | 0.789801 | 0.964 | 0.754 | 0 B cells | LTB       |
| 5658 FCRL2      | 0 | 0.788312 | 0.201 | 0.01  | 0 B cells | FCRL2     |
| 5659 SP100.2    | 0 | 0.784107 | 0.619 | 0.422 | 0 B cells | SP100     |
| 5660 ARHGAP17   | 0 | 0.778947 | 0.325 | 0.113 | 0 B cells | ARHGAP17  |
| 5661 PLCG2      | 0 | 0.77846  | 0.273 | 0.061 | 0 B cells | PLCG2     |
| 5662 CCDC50     | 0 | 0.775613 | 0.265 | 0.06  | 0 B cells | CCDC50    |
| 5663 SNX22      | 0 | 0.764002 | 0.199 | 0.008 | 0 B cells | SNX22     |
| 5664 NT5C.2     | 0 | 0.743369 | 0.528 | 0.324 | 0 B cells | NT5C      |
| 5665 ANXA4      | 0 | 0.740599 | 0.286 | 0.106 | 0 B cells | ANXA4     |

|                |   |          |       |       |           |            |
|----------------|---|----------|-------|-------|-----------|------------|
| 5666 FAM3C.1   | 0 | 0.739524 | 0.226 | 0.058 | 0 B cells | FAM3C      |
| 5667 STAP1     | 0 | 0.736731 | 0.204 | 0.016 | 0 B cells | STAP1      |
| 5668 UVRAG.1   | 0 | 0.735306 | 0.328 | 0.133 | 0 B cells | UVRAG      |
| 5669 SCIMP.3   | 0 | 0.735021 | 0.224 | 0.058 | 0 B cells | SCIMP      |
| 5670 PLEKHA2   | 0 | 0.732781 | 0.243 | 0.068 | 0 B cells | PLEKHA2    |
| 5671 JUP.1     | 0 | 0.72704  | 0.188 | 0.015 | 0 B cells | JUP        |
| 5672 IFT57.1   | 0 | 0.726751 | 0.279 | 0.102 | 0 B cells | IFT57      |
| 5673 BCL7A     | 0 | 0.723579 | 0.203 | 0.029 | 0 B cells | BCL7A      |
| 5674 REL.2     | 0 | 0.722999 | 0.378 | 0.181 | 0 B cells | REL        |
| 5675 TSTD1.2   | 0 | 0.713672 | 0.64  | 0.482 | 0 B cells | TSTD1      |
| 5676 CTSB.3    | 0 | 0.71039  | 0.29  | 0.109 | 0 B cells | CTSH       |
| 5677 ISG20.3   | 0 | 0.709126 | 0.693 | 0.516 | 0 B cells | ISG20      |
| 5678 SMARCB1.  | 0 | 0.708496 | 0.454 | 0.271 | 0 B cells | SMARCB1    |
| 5679 SH3BP5.1  | 0 | 0.705329 | 0.382 | 0.186 | 0 B cells | SH3BP5     |
| 5680 CD9       | 0 | 0.704219 | 0.178 | 0.041 | 0 B cells | CD9        |
| 5681 BTG2.1    | 0 | 0.70399  | 0.428 | 0.233 | 0 B cells | BTG2       |
| 5682 MZB1.3    | 0 | 0.702003 | 0.357 | 0.037 | 0 B cells | MZB1       |
| 5683 FCHSD2    | 0 | 0.695076 | 0.233 | 0.057 | 0 B cells | FCHSD2     |
| 5684 IGHG3.1   | 0 | 0.692216 | 0.15  | 0.008 | 0 B cells | IGHG3      |
| 5685 KIAA0040  | 0 | 0.690509 | 0.295 | 0.124 | 0 B cells | KIAA0040   |
| 5686 BLOC1S2.1 | 0 | 0.69032  | 0.414 | 0.243 | 0 B cells | BLOC1S2    |
| 5687 PLEKHG1   | 0 | 0.690293 | 0.191 | 0.007 | 0 B cells | PLEKHG1    |
| 5688 COL19A1   | 0 | 0.681422 | 0.166 | 0.004 | 0 B cells | COL19A1    |
| 5689 FGD2.1    | 0 | 0.680917 | 0.218 | 0.045 | 0 B cells | FGD2       |
| 5690 DRAM2.1   | 0 | 0.675237 | 0.349 | 0.178 | 0 B cells | DRAM2      |
| 5691 LHPP.2    | 0 | 0.674801 | 0.261 | 0.123 | 0 B cells | LHPP       |
| 5692 WASHC4.1  | 0 | 0.670499 | 0.324 | 0.155 | 0 B cells | WASHC4     |
| 5693 ARHGAP24  | 0 | 0.670336 | 0.186 | 0.02  | 0 B cells | ARHGAP24   |
| 5694 PPM1K.2   | 0 | 0.669987 | 0.328 | 0.15  | 0 B cells | PPM1K      |
| 5695 FAM96A.1  | 0 | 0.666604 | 0.48  | 0.308 | 0 B cells | FAM96A     |
| 5696 RNF141.2  | 0 | 0.666286 | 0.277 | 0.112 | 0 B cells | RNF141     |
| 5697 TMEM154.  | 0 | 0.665919 | 0.283 | 0.111 | 0 B cells | TMEM154    |
| 5698 RPL22L1.3 | 0 | 0.663142 | 0.582 | 0.422 | 0 B cells | RPL22L1    |
| 5699 CLEC17A   | 0 | 0.658899 | 0.171 | 0.004 | 0 B cells | CLEC17A    |
| 5700 EBLN3P.2  | 0 | 0.654713 | 0.346 | 0.181 | 0 B cells | EBLN3P     |
| 5701 APPL1     | 0 | 0.652451 | 0.339 | 0.173 | 0 B cells | APPL1      |
| 5702 SYVN1.2   | 0 | 0.651313 | 0.255 | 0.093 | 0 B cells | SYVN1      |
| 5703 CHCHD10.  | 0 | 0.64583  | 0.56  | 0.395 | 0 B cells | CHCHD10    |
| 5704 SPINT2.2  | 0 | 0.638561 | 0.399 | 0.22  | 0 B cells | SPINT2     |
| 5705 AC007384. | 0 | 0.63598  | 0.185 | 0.032 | 0 B cells | AC007384.1 |
| 5706 CD200.1   | 0 | 0.635162 | 0.152 | 0.013 | 0 B cells | CD200      |
| 5707 LMBRD1.1  | 0 | 0.631796 | 0.41  | 0.247 | 0 B cells | LMBRD1     |
| 5708 ELOVL5.1  | 0 | 0.629229 | 0.414 | 0.249 | 0 B cells | ELOVL5     |
| 5709 SEC62.1   | 0 | 0.622915 | 0.61  | 0.495 | 0 B cells | SEC62      |
| 5710 MBD4      | 0 | 0.622048 | 0.341 | 0.179 | 0 B cells | MBD4       |
| 5711 CAMK2D.1  | 0 | 0.620188 | 0.227 | 0.074 | 0 B cells | CAMK2D     |
| 5712 PXK.1     | 0 | 0.617824 | 0.252 | 0.089 | 0 B cells | PXK        |



|                 |   |          |       |       |           |            |
|-----------------|---|----------|-------|-------|-----------|------------|
| 5713 BTG1.3     | 0 | 0.617238 | 0.937 | 0.862 | 0 B cells | BTG1       |
| 5714 SMC6       | 0 | 0.610959 | 0.228 | 0.073 | 0 B cells | SMC6       |
| 5715 CPNE5.1    | 0 | 0.608852 | 0.171 | 0.017 | 0 B cells | CPNE5      |
| 5716 C11orf24.1 | 0 | 0.608154 | 0.217 | 0.069 | 0 B cells | C11orf24   |
| 5717 RB1        | 0 | 0.601412 | 0.266 | 0.12  | 0 B cells | RB1        |
| 5718 CCDC32.2   | 0 | 0.601368 | 0.263 | 0.124 | 0 B cells | CCDC32     |
| 5719 RAB30      | 0 | 0.600564 | 0.189 | 0.04  | 0 B cells | RAB30      |
| 5720 GUCD1      | 0 | 0.600482 | 0.206 | 0.056 | 0 B cells | GUCD1      |
| 5721 CAPG.3     | 0 | 0.599257 | 0.365 | 0.158 | 0 B cells | CAPG       |
| 5722 P2RY10.1   | 0 | 0.591761 | 0.225 | 0.077 | 0 B cells | P2RY10     |
| 5723 KMO        | 0 | 0.583863 | 0.157 | 0.015 | 0 B cells | KMO        |
| 5724 PARP15.1   | 0 | 0.580544 | 0.228 | 0.072 | 0 B cells | PARP15     |
| 5725 NCF4.2     | 0 | 0.578892 | 0.304 | 0.113 | 0 B cells | NCF4       |
| 5726 ZNF296     | 0 | 0.574466 | 0.178 | 0.033 | 0 B cells | ZNF296     |
| 5727 TMEM156.   | 0 | 0.573553 | 0.222 | 0.081 | 0 B cells | TMEM156    |
| 5728 GDI2       | 0 | 0.573055 | 0.647 | 0.532 | 0 B cells | GDI2       |
| 5729 KHDRBS2    | 0 | 0.569359 | 0.137 | 0.004 | 0 B cells | KHDRBS2    |
| 5730 HS3ST1     | 0 | 0.567619 | 0.129 | 0.003 | 0 B cells | HS3ST1     |
| 5731 FADS3      | 0 | 0.566869 | 0.145 | 0.009 | 0 B cells | FADS3      |
| 5732 AL161781.  | 0 | 0.565198 | 0.127 | 0.002 | 0 B cells | AL161781.2 |
| 5733 PCDH9      | 0 | 0.563458 | 0.121 | 0.004 | 0 B cells | PCDH9      |
| 5734 PHACTR1    | 0 | 0.558146 | 0.147 | 0.015 | 0 B cells | PHACTR1    |
| 5735 DERL3.1    | 0 | 0.557417 | 0.187 | 0.026 | 0 B cells | DERL3      |
| 5736 AGPAT5.1   | 0 | 0.551416 | 0.188 | 0.063 | 0 B cells | AGPAT5     |
| 5737 LSM7.2     | 0 | 0.550395 | 0.722 | 0.614 | 0 B cells | LSM7       |
| 5738 FCRL5.1    | 0 | 0.547115 | 0.132 | 0.013 | 0 B cells | FCRL5      |
| 5739 SNX29.1    | 0 | 0.545908 | 0.216 | 0.085 | 0 B cells | SNX29      |
| 5740 HDAC9      | 0 | 0.542888 | 0.152 | 0.021 | 0 B cells | HDAC9      |
| 5741 HSH2D.1    | 0 | 0.541932 | 0.281 | 0.134 | 0 B cells | HSH2D      |
| 5742 LINC01480  | 0 | 0.539402 | 0.118 | 0.01  | 0 B cells | LINC01480  |
| 5743 CAMK1D     | 0 | 0.53663  | 0.239 | 0.098 | 0 B cells | CAMK1D     |
| 5744 TRAF4      | 0 | 0.535843 | 0.163 | 0.034 | 0 B cells | TRAF4      |
| 5745 HIP1R      | 0 | 0.532487 | 0.191 | 0.054 | 0 B cells | HIP1R      |
| 5746 SEMA4B     | 0 | 0.530816 | 0.156 | 0.023 | 0 B cells | SEMA4B     |
| 5747 LIMD2.3    | 0 | 0.529177 | 0.964 | 0.915 | 0 B cells | LIMD2      |
| 5748 KDM4B      | 0 | 0.52773  | 0.179 | 0.045 | 0 B cells | KDM4B      |
| 5749 IKZF3.2    | 0 | 0.526614 | 0.264 | 0.121 | 0 B cells | IKZF3      |
| 5750 ADAM19     | 0 | 0.524957 | 0.153 | 0.026 | 0 B cells | ADAM19     |
| 5751 CD81       | 0 | 0.522197 | 0.187 | 0.057 | 0 B cells | CD81       |
| 5752 TUBB6.1    | 0 | 0.519855 | 0.143 | 0.019 | 0 B cells | TUBB6      |
| 5753 BCAS4.2    | 0 | 0.519716 | 0.236 | 0.1   | 0 B cells | BCAS4      |
| 5754 CNR2       | 0 | 0.51496  | 0.139 | 0.007 | 0 B cells | CNR2       |
| 5755 UBE2E2     | 0 | 0.512085 | 0.187 | 0.064 | 0 B cells | UBE2E2     |
| 5756 DAPP1      | 0 | 0.510092 | 0.189 | 0.066 | 0 B cells | DAPP1      |
| 5757 RFX5       | 0 | 0.509807 | 0.204 | 0.079 | 0 B cells | RFX5       |
| 5758 COBLL1.1   | 0 | 0.505598 | 0.135 | 0.013 | 0 B cells | COBLL1     |
| 5759 CR2        | 0 | 0.498922 | 0.143 | 0.027 | 0 B cells | CR2        |

|                 |   |          |       |       |           |            |
|-----------------|---|----------|-------|-------|-----------|------------|
| 5760 SEL1L3.1   | 0 | 0.498782 | 0.161 | 0.039 | 0 B cells | SEL1L3     |
| 5761 ARPC3.2    | 0 | 0.49633  | 0.953 | 0.89  | 0 B cells | ARPC3      |
| 5762 WDFY4      | 0 | 0.489225 | 0.142 | 0.017 | 0 B cells | WDFY4      |
| 5763 BEND5      | 0 | 0.488242 | 0.149 | 0.029 | 0 B cells | BEND5      |
| 5764 UCP2.3     | 0 | 0.484989 | 0.84  | 0.759 | 0 B cells | UCP2       |
| 5765 Mar-03     | 0 | 0.479858 | 0.153 | 0.039 | 0 B cells | Mar-03     |
| 5766 DBNDD1     | 0 | 0.479486 | 0.104 | 0.008 | 0 B cells | DBNDD1     |
| 5767 LINC01857  | 0 | 0.476238 | 0.112 | 0.002 | 0 B cells | LINC01857  |
| 5768 TFEB       | 0 | 0.473151 | 0.159 | 0.037 | 0 B cells | TFEB       |
| 5769 KLHL14.1   | 0 | 0.470698 | 0.116 | 0.008 | 0 B cells | KLHL14     |
| 5770 RPS11.2    | 0 | 0.469578 | 0.859 | 0.798 | 0 B cells | RPS11      |
| 5771 WDR34      | 0 | 0.464789 | 0.144 | 0.031 | 0 B cells | WDR34      |
| 5772 TAGLN2.2   | 0 | 0.460059 | 0.834 | 0.751 | 0 B cells | TAGLN2     |
| 5773 STRBP      | 0 | 0.45996  | 0.14  | 0.032 | 0 B cells | STRBP      |
| 5774 TNFRSF13E  | 0 | 0.456262 | 0.126 | 0.014 | 0 B cells | TNFRSF13B  |
| 5775 PIP5K1B    | 0 | 0.45611  | 0.127 | 0.02  | 0 B cells | PIP5K1B    |
| 5776 METTL7A.1  | 0 | 0.453298 | 0.153 | 0.047 | 0 B cells | METTL7A    |
| 5777 TCTN1      | 0 | 0.447827 | 0.118 | 0.024 | 0 B cells | TCTN1      |
| 5778 RPL8.2     | 0 | 0.445598 | 1     | 0.989 | 0 B cells | RPL8       |
| 5779 EBF1       | 0 | 0.440796 | 0.115 | 0.002 | 0 B cells | EBF1       |
| 5780 LARGE2     | 0 | 0.436702 | 0.104 | 0.003 | 0 B cells | LARGE2     |
| 5781 AC007569.  | 0 | 0.435265 | 0.111 | 0.007 | 0 B cells | AC007569.1 |
| 5782 RPL18A.2   | 0 | 0.430176 | 1     | 0.989 | 0 B cells | RPL18A     |
| 5783 P2RX5      | 0 | 0.41659  | 0.112 | 0.012 | 0 B cells | P2RX5      |
| 5784 MT-CO2     | 0 | 0.413895 | 1     | 0.997 | 0 B cells | MT-CO2     |
| 5785 AC012236.  | 0 | 0.40971  | 0.106 | 0.015 | 0 B cells | AC012236.1 |
| 5786 CLIC4.1    | 0 | 0.406851 | 0.121 | 0.029 | 0 B cells | CLIC4      |
| 5787 AC104971.  | 0 | 0.398442 | 0.106 | 0.011 | 0 B cells | AC104971.3 |
| 5788 CLECL1.1   | 0 | 0.377456 | 0.11  | 0.023 | 0 B cells | CLECL1     |
| 5789 SIGLEC10.1 | 0 | 0.377078 | 0.139 | 0.039 | 0 B cells | SIGLEC10   |
| 5790 FAU.2      | 0 | 0.374152 | 1     | 0.997 | 0 B cells | FAU        |
| 5791 EEF2.3     | 0 | 0.366399 | 0.964 | 0.925 | 0 B cells | EEF2       |
| 5792 CYBB.3     | 0 | 0.316338 | 0.288 | 0.127 | 0 B cells | CYBB       |
| 5793 MT-ATP6.2  | 0 | 0.314078 | 0.997 | 0.992 | 0 B cells | MT-ATP6    |
| 5794 RPS5.3     | 0 | 0.290198 | 1     | 0.979 | 0 B cells | RPS5       |
| 5795 RPS23.3    | 0 | 0.280524 | 1     | 0.99  | 0 B cells | RPS23      |
| 5796 FTH1.2     | 0 | -0.27009 | 0.991 | 0.978 | 0 B cells | FTH1       |
| 5797 TMSB10.2   | 0 | -0.30951 | 1     | 0.996 | 0 B cells | TMSB10     |
| 5798 JCHAIN.2   | 0 | -0.324   | 0.311 | 0.041 | 0 B cells | JCHAIN     |
| 5799 RPS14.2    | 0 | -0.33038 | 0.996 | 0.99  | 0 B cells | RPS14      |
| 5800 OST4.1     | 0 | -0.39537 | 0.729 | 0.875 | 0 B cells | OST4       |
| 5801 PRKCQ.2    | 0 | -0.42482 | 0.011 | 0.132 | 0 B cells | PRKCQ      |
| 5802 GIMAP8.2   | 0 | -0.43192 | 0.01  | 0.138 | 0 B cells | GIMAP8     |
| 5803 ADA.1      | 0 | -0.43557 | 0.025 | 0.167 | 0 B cells | ADA        |
| 5804 OTULINL.2  | 0 | -0.43966 | 0.01  | 0.149 | 0 B cells | OTULINL    |
| 5805 CD28.2     | 0 | -0.44676 | 0.013 | 0.138 | 0 B cells | CD28       |
| 5806 RORA.1     | 0 | -0.45897 | 0.012 | 0.134 | 0 B cells | RORA       |

|      |           |   |          |       |       |   |         |           |
|------|-----------|---|----------|-------|-------|---|---------|-----------|
| 5807 | ATP5MG.1  | 0 | -0.45901 | 0.849 | 0.944 | 0 | B cells | ATP5MG    |
| 5808 | TNIK.2    | 0 | -0.46089 | 0.017 | 0.15  | 0 | B cells | TNIK      |
| 5809 | EPHX2.2   | 0 | -0.46444 | 0.015 | 0.14  | 0 | B cells | EPHX2     |
| 5810 | HRH2.1    | 0 | -0.46548 | 0.004 | 0.121 | 0 | B cells | HRH2      |
| 5811 | RNF166.1  | 0 | -0.46605 | 0.063 | 0.22  | 0 | B cells | RNF166    |
| 5812 | IPCEF1.2  | 0 | -0.46841 | 0.011 | 0.145 | 0 | B cells | IPCEF1    |
| 5813 | MYL12B.1  | 0 | -0.47335 | 0.678 | 0.837 | 0 | B cells | MYL12B    |
| 5814 | BCL11B.3  | 0 | -0.47478 | 0.013 | 0.14  | 0 | B cells | BCL11B    |
| 5815 | ATP5MD.2  | 0 | -0.48196 | 0.452 | 0.669 | 0 | B cells | ATP5MD    |
| 5816 | AES.3     | 0 | -0.48466 | 0.618 | 0.771 | 0 | B cells | AES       |
| 5817 | ATP5F1E.2 | 0 | -0.49583 | 0.938 | 0.985 | 0 | B cells | ATP5F1E   |
| 5818 | PTPRC.2   | 0 | -0.49611 | 0.768 | 0.885 | 0 | B cells | PTPRC     |
| 5819 | TNFRSF25. | 0 | -0.49882 | 0.019 | 0.16  | 0 | B cells | TNFRSF25  |
| 5820 | B2M.3     | 0 | -0.4989  | 1     | 0.999 | 0 | B cells | B2M       |
| 5821 | ITGA6.2   | 0 | -0.49913 | 0.018 | 0.155 | 0 | B cells | ITGA6     |
| 5822 | CRIP1.1   | 0 | -0.50105 | 0.207 | 0.445 | 0 | B cells | CRIP1     |
| 5823 | TMA7.1    | 0 | -0.5026  | 0.843 | 0.956 | 0 | B cells | TMA7      |
| 5824 | UQCR11.2  | 0 | -0.50443 | 0.596 | 0.8   | 0 | B cells | UQCR11    |
| 5825 | SEMA4D    | 0 | -0.50738 | 0.06  | 0.221 | 0 | B cells | SEMA4D    |
| 5826 | DYNLT1.3  | 0 | -0.50753 | 0.15  | 0.337 | 0 | B cells | DYNLT1    |
| 5827 | DGKZ.2    | 0 | -0.50917 | 0.033 | 0.197 | 0 | B cells | DGKZ      |
| 5828 | THEM4.2   | 0 | -0.5127  | 0.053 | 0.206 | 0 | B cells | THEM4     |
| 5829 | GATA3.2   | 0 | -0.51305 | 0.011 | 0.15  | 0 | B cells | GATA3     |
| 5830 | UBASH3A.3 | 0 | -0.51564 | 0.013 | 0.163 | 0 | B cells | UBASH3A   |
| 5831 | RGL4.2    | 0 | -0.53147 | 0.014 | 0.149 | 0 | B cells | RGL4      |
| 5832 | THEMIS.3  | 0 | -0.5329  | 0.014 | 0.166 | 0 | B cells | THEMIS    |
| 5833 | ARPC5.2   | 0 | -0.53937 | 0.477 | 0.675 | 0 | B cells | ARPC5     |
| 5834 | STAT4.2   | 0 | -0.54199 | 0.013 | 0.157 | 0 | B cells | STAT4     |
| 5835 | POLR2L.2  | 0 | -0.54459 | 0.364 | 0.598 | 0 | B cells | POLR2L    |
| 5836 | PITPNC1.2 | 0 | -0.54724 | 0.041 | 0.21  | 0 | B cells | PITPNC1   |
| 5837 | COX8A.2   | 0 | -0.54797 | 0.477 | 0.661 | 0 | B cells | COX8A     |
| 5838 | STOM.1    | 0 | -0.55196 | 0.015 | 0.146 | 0 | B cells | STOM      |
| 5839 | UQCRB.1   | 0 | -0.55702 | 0.614 | 0.82  | 0 | B cells | UQCRB     |
| 5840 | COX6C     | 0 | -0.56768 | 0.617 | 0.821 | 0 | B cells | COX6C     |
| 5841 | DGKA.3    | 0 | -0.57025 | 0.171 | 0.373 | 0 | B cells | DGKA      |
| 5842 | PTGER2.1  | 0 | -0.57172 | 0.004 | 0.139 | 0 | B cells | PTGER2    |
| 5843 | INPP4B.2  | 0 | -0.57381 | 0.016 | 0.171 | 0 | B cells | INPP4B    |
| 5844 | CD40LG.2  | 0 | -0.57442 | 0.013 | 0.147 | 0 | B cells | CD40LG    |
| 5845 | RBL2.3    | 0 | -0.57999 | 0.227 | 0.441 | 0 | B cells | RBL2      |
| 5846 | NELL2.3   | 0 | -0.58338 | 0.011 | 0.154 | 0 | B cells | NELL2     |
| 5847 | IL6ST.2   | 0 | -0.58364 | 0.048 | 0.223 | 0 | B cells | IL6ST     |
| 5848 | LINC02273 | 0 | -0.58468 | 0.027 | 0.191 | 0 | B cells | LINC02273 |
| 5849 | ID2.1     | 0 | -0.58561 | 0.011 | 0.168 | 0 | B cells | ID2       |
| 5850 | SORL1.2   | 0 | -0.58718 | 0.061 | 0.237 | 0 | B cells | SORL1     |
| 5851 | SH2D1A.2  | 0 | -0.58926 | 0.012 | 0.172 | 0 | B cells | SH2D1A    |
| 5852 | CFL1.3    | 0 | -0.58983 | 0.914 | 0.966 | 0 | B cells | CFL1      |
| 5853 | VAMP5.2   | 0 | -0.59131 | 0.155 | 0.347 | 0 | B cells | VAMP5     |

|      |            |   |          |       |       |           |           |
|------|------------|---|----------|-------|-------|-----------|-----------|
| 5854 | CYTIP.2    | 0 | -0.592   | 0.321 | 0.567 | 0 B cells | CYTIP     |
| 5855 | EMP3.3     | 0 | -0.59716 | 0.661 | 0.834 | 0 B cells | EMP3      |
| 5856 | RCAN3.3    | 0 | -0.60465 | 0.081 | 0.264 | 0 B cells | RCAN3     |
| 5857 | LINC01550  | 0 | -0.60726 | 0.016 | 0.185 | 0 B cells | LINC01550 |
| 5858 | MYL6.2     | 0 | -0.60836 | 0.917 | 0.958 | 0 B cells | MYL6      |
| 5859 | AOAH.2     | 0 | -0.60929 | 0.009 | 0.17  | 0 B cells | AOAH      |
| 5860 | FYN.1      | 0 | -0.61099 | 0.034 | 0.206 | 0 B cells | FYN       |
| 5861 | MVP.1      | 0 | -0.61125 | 0.142 | 0.376 | 0 B cells | MVP       |
| 5862 | HMOX2.2    | 0 | -0.61318 | 0.221 | 0.456 | 0 B cells | HMOX2     |
| 5863 | TPT1.2     | 0 | -0.61377 | 0.99  | 0.996 | 0 B cells | TPT1      |
| 5864 | GBP5       | 0 | -0.61769 | 0.043 | 0.197 | 0 B cells | GBP5      |
| 5865 | RNF213.3   | 0 | -0.62631 | 0.226 | 0.457 | 0 B cells | RNF213    |
| 5866 | CTSD.2     | 0 | -0.63272 | 0.016 | 0.154 | 0 B cells | CTSD      |
| 5867 | SKAP1.3    | 0 | -0.633   | 0.19  | 0.424 | 0 B cells | SKAP1     |
| 5868 | GYPC.3     | 0 | -0.63361 | 0.531 | 0.723 | 0 B cells | GYPC      |
| 5869 | GBP2.2     | 0 | -0.6359  | 0.043 | 0.239 | 0 B cells | GBP2      |
| 5870 | PRDX2.3    | 0 | -0.63821 | 0.251 | 0.497 | 0 B cells | PRDX2     |
| 5871 | RAP1B.1    | 0 | -0.63883 | 0.462 | 0.681 | 0 B cells | RAP1B     |
| 5872 | LDHA.2     | 0 | -0.64044 | 0.425 | 0.65  | 0 B cells | LDHA      |
| 5873 | TPST2      | 0 | -0.64376 | 0.103 | 0.286 | 0 B cells | TPST2     |
| 5874 | GLIPR2.2   | 0 | -0.6525  | 0.061 | 0.245 | 0 B cells | GLIPR2    |
| 5875 | TSPAN14    | 0 | -0.65669 | 0.082 | 0.31  | 0 B cells | TSPAN14   |
| 5876 | CD4.2      | 0 | -0.65724 | 0.015 | 0.202 | 0 B cells | CD4       |
| 5877 | MATK.2     | 0 | -0.65845 | 0.013 | 0.153 | 0 B cells | MATK      |
| 5878 | SATB1.2    | 0 | -0.65867 | 0.091 | 0.299 | 0 B cells | SATB1     |
| 5879 | DSTN.1     | 0 | -0.66027 | 0.103 | 0.332 | 0 B cells | DSTN      |
| 5880 | GMFG.3     | 0 | -0.66079 | 0.589 | 0.827 | 0 B cells | GMFG      |
| 5881 | GLRX.1     | 0 | -0.66087 | 0.191 | 0.419 | 0 B cells | GLRX      |
| 5882 | GIMAP5.3   | 0 | -0.66326 | 0.017 | 0.204 | 0 B cells | GIMAP5    |
| 5883 | LRRN3.3    | 0 | -0.6682  | 0.012 | 0.164 | 0 B cells | LRRN3     |
| 5884 | CD96.3     | 0 | -0.66825 | 0.042 | 0.247 | 0 B cells | CD96      |
| 5885 | SPOCK2.3   | 0 | -0.66927 | 0.169 | 0.382 | 0 B cells | SPOCK2    |
| 5886 | C12orf57.2 | 0 | -0.67027 | 0.637 | 0.799 | 0 B cells | C12orf57  |
| 5887 | NDUFS5.2   | 0 | -0.6726  | 0.34  | 0.623 | 0 B cells | NDUFS5    |
| 5888 | TMEM204.   | 0 | -0.67702 | 0.029 | 0.228 | 0 B cells | TMEM204   |
| 5889 | ATP1A1.1   | 0 | -0.67762 | 0.107 | 0.347 | 0 B cells | ATP1A1    |
| 5890 | CCND3.2    | 0 | -0.67922 | 0.381 | 0.659 | 0 B cells | CCND3     |
| 5891 | ARL4C.3    | 0 | -0.68188 | 0.113 | 0.32  | 0 B cells | ARL4C     |
| 5892 | MYO1F.2    | 0 | -0.68672 | 0.053 | 0.211 | 0 B cells | MYO1F     |
| 5893 | PXN.2      | 0 | -0.68838 | 0.018 | 0.221 | 0 B cells | PXN       |
| 5894 | LITAF.1    | 0 | -0.69027 | 0.391 | 0.599 | 0 B cells | LITAF     |
| 5895 | CFP.2      | 0 | -0.69263 | 0.01  | 0.15  | 0 B cells | CFP       |
| 5896 | TRABD2A.3  | 0 | -0.69424 | 0.034 | 0.232 | 0 B cells | TRABD2A   |
| 5897 | TXK.3      | 0 | -0.6971  | 0.019 | 0.214 | 0 B cells | TXK       |
| 5898 | SOCS3.2    | 0 | -0.69866 | 0.031 | 0.205 | 0 B cells | SOCS3     |
| 5899 | TRAC.3     | 0 | -0.7093  | 0.131 | 0.333 | 0 B cells | TRAC      |
| 5900 | CD5.3      | 0 | -0.71052 | 0.071 | 0.291 | 0 B cells | CD5       |

|      |           |   |          |       |       |           |          |
|------|-----------|---|----------|-------|-------|-----------|----------|
| 5901 | GIMAP6.2  | 0 | -0.71066 | 0.016 | 0.226 | 0 B cells | GIMAP6   |
| 5902 | BIN2.2    | 0 | -0.71215 | 0.293 | 0.569 | 0 B cells | BIN2     |
| 5903 | GIMAP2.2  | 0 | -0.71618 | 0.073 | 0.305 | 0 B cells | GIMAP2   |
| 5904 | PIK3IP1.3 | 0 | -0.71997 | 0.133 | 0.363 | 0 B cells | PIK3IP1  |
| 5905 | HSPB1.3   | 0 | -0.72905 | 0.264 | 0.537 | 0 B cells | HSPB1    |
| 5906 | CSTB.1    | 0 | -0.73232 | 0.286 | 0.528 | 0 B cells | CSTB     |
| 5907 | ABRACL    | 0 | -0.73251 | 0.325 | 0.635 | 0 B cells | ABRACL   |
| 5908 | SIRPG.3   | 0 | -0.73362 | 0.021 | 0.228 | 0 B cells | SIRPG    |
| 5909 | MT1X.1    | 0 | -0.73494 | 0.042 | 0.27  | 0 B cells | MT1X     |
| 5910 | APMAP.1   | 0 | -0.74084 | 0.083 | 0.266 | 0 B cells | APMAP    |
| 5911 | ACTB.3    | 0 | -0.74239 | 0.999 | 0.999 | 0 B cells | ACTB     |
| 5912 | HSPA8.3   | 0 | -0.74656 | 0.783 | 0.895 | 0 B cells | HSPA8    |
| 5913 | CALM3     | 0 | -0.74766 | 0.289 | 0.586 | 0 B cells | CALM3    |
| 5914 | RNF149.2  | 0 | -0.75006 | 0.131 | 0.371 | 0 B cells | RNF149   |
| 5915 | CD300A.2  | 0 | -0.75027 | 0.016 | 0.191 | 0 B cells | CD300A   |
| 5916 | CSTA.1    | 0 | -0.75106 | 0.002 | 0.116 | 0 B cells | CSTA     |
| 5917 | EVL.3     | 0 | -0.75177 | 0.623 | 0.78  | 0 B cells | EVL      |
| 5918 | CX3CR1.1  | 0 | -0.75908 | 0.001 | 0.132 | 0 B cells | CX3CR1   |
| 5919 | TXN.3     | 0 | -0.76072 | 0.199 | 0.416 | 0 B cells | TXN      |
| 5920 | FPR1.1    | 0 | -0.76284 | 0.003 | 0.117 | 0 B cells | FPR1     |
| 5921 | TMEM173.  | 0 | -0.76428 | 0.019 | 0.253 | 0 B cells | TMEM173  |
| 5922 | AGTRAP.2  | 0 | -0.76588 | 0.082 | 0.279 | 0 B cells | AGTRAP   |
| 5923 | TNFRSF1A. | 0 | -0.76622 | 0.012 | 0.246 | 0 B cells | TNFRSF1A |
| 5924 | SARAF.3   | 0 | -0.76712 | 0.83  | 0.907 | 0 B cells | SARAF    |
| 5925 | ACTG1.1   | 0 | -0.76904 | 0.884 | 0.976 | 0 B cells | ACTG1    |
| 5926 | NINJ1.1   | 0 | -0.77289 | 0.024 | 0.24  | 0 B cells | NINJ1    |
| 5927 | SAMD3.2   | 0 | -0.77556 | 0.016 | 0.222 | 0 B cells | SAMD3    |
| 5928 | BEX3.3    | 0 | -0.77867 | 0.028 | 0.236 | 0 B cells | BEX3     |
| 5929 | GSTK1.1   | 0 | -0.78077 | 0.466 | 0.751 | 0 B cells | GSTK1    |
| 5930 | UPP1.2    | 0 | -0.7824  | 0.025 | 0.263 | 0 B cells | UPP1     |
| 5931 | TMSB4X.3  | 0 | -0.78564 | 0.999 | 0.998 | 0 B cells | TMSB4X   |
| 5932 | TMIGD2.2  | 0 | -0.78693 | 0.022 | 0.247 | 0 B cells | TMIGD2   |
| 5933 | SIGIRR.2  | 0 | -0.78955 | 0.184 | 0.472 | 0 B cells | SIGIRR   |
| 5934 | PCED1B.2  | 0 | -0.79436 | 0.13  | 0.353 | 0 B cells | PCED1B   |
| 5935 | SELENOW.  | 0 | -0.79557 | 0.256 | 0.574 | 0 B cells | SELENOW  |
| 5936 | JAML.2    | 0 | -0.79765 | 0.014 | 0.23  | 0 B cells | JAML     |
| 5937 | SH2D2A.2  | 0 | -0.79852 | 0.012 | 0.184 | 0 B cells | SH2D2A   |
| 5938 | CD6.3     | 0 | -0.80672 | 0.039 | 0.277 | 0 B cells | CD6      |
| 5939 | ARRB2.3   | 0 | -0.81939 | 0.202 | 0.483 | 0 B cells | ARRB2    |
| 5940 | PFN1.3    | 0 | -0.83132 | 0.961 | 0.992 | 0 B cells | PFN1     |
| 5941 | MYL12A.3  | 0 | -0.85349 | 0.87  | 0.972 | 0 B cells | MYL12A   |
| 5942 | SPN.1     | 0 | -0.85585 | 0.019 | 0.262 | 0 B cells | SPN      |
| 5943 | ADGRE5.2  | 0 | -0.86564 | 0.087 | 0.337 | 0 B cells | ADGRE5   |
| 5944 | RGCC.3    | 0 | -0.86655 | 0.032 | 0.271 | 0 B cells | RGCC     |
| 5945 | DOK2.3    | 0 | -0.86975 | 0.041 | 0.285 | 0 B cells | DOK2     |
| 5946 | AAK1      | 0 | -0.87553 | 0.032 | 0.303 | 0 B cells | AAK1     |
| 5947 | LGALS3.2  | 0 | -0.87565 | 0.016 | 0.156 | 0 B cells | LGALS3   |

|                |   |          |       |       |           |           |
|----------------|---|----------|-------|-------|-----------|-----------|
| 5948 CALM1.3   | 0 | -0.87736 | 0.756 | 0.922 | 0 B cells | CALM1     |
| 5949 ITM2B.3   | 0 | -0.87833 | 0.738 | 0.936 | 0 B cells | ITM2B     |
| 5950 TC2N.2    | 0 | -0.88634 | 0.03  | 0.282 | 0 B cells | TC2N      |
| 5951 MGAT4A.1  | 0 | -0.89793 | 0.047 | 0.327 | 0 B cells | MGAT4A    |
| 5952 ITK.3     | 0 | -0.90107 | 0.028 | 0.284 | 0 B cells | ITK       |
| 5953 GIMAP1.1  | 0 | -0.90617 | 0.027 | 0.298 | 0 B cells | GIMAP1    |
| 5954 PRMT2.3   | 0 | -0.9284  | 0.288 | 0.621 | 0 B cells | PRMT2     |
| 5955 NDFIP1.1  | 0 | -0.93643 | 0.183 | 0.538 | 0 B cells | NDFIP1    |
| 5956 CD99.1    | 0 | -0.96056 | 0.378 | 0.598 | 0 B cells | CD99      |
| 5957 OXNAD1.3  | 0 | -0.96211 | 0.039 | 0.318 | 0 B cells | OXNAD1    |
| 5958 SLFN5.3   | 0 | -0.96887 | 0.04  | 0.333 | 0 B cells | SLFN5     |
| 5959 SLC9A3R1. | 0 | -0.98173 | 0.183 | 0.495 | 0 B cells | SLC9A3R1  |
| 5960 KLRD1.1   | 0 | -1.00913 | 0.002 | 0.131 | 0 B cells | KLRD1     |
| 5961 DENND2D.  | 0 | -1.01653 | 0.17  | 0.492 | 0 B cells | DENND2D   |
| 5962 PRKCH.3   | 0 | -1.03055 | 0.025 | 0.328 | 0 B cells | PRKCH     |
| 5963 NEAT1.2   | 0 | -1.03455 | 0.185 | 0.374 | 0 B cells | NEAT1     |
| 5964 ACTN1.2   | 0 | -1.0388  | 0.03  | 0.337 | 0 B cells | ACTN1     |
| 5965 TRAT1.3   | 0 | -1.04088 | 0.028 | 0.306 | 0 B cells | TRAT1     |
| 5966 CTSC.2    | 0 | -1.05912 | 0.134 | 0.403 | 0 B cells | CTSC      |
| 5967 GAPDH.3   | 0 | -1.07267 | 0.812 | 0.933 | 0 B cells | GAPDH     |
| 5968 LDLRAP1.2 | 0 | -1.07631 | 0.068 | 0.382 | 0 B cells | LDLRAP1   |
| 5969 LIME1.3   | 0 | -1.08851 | 0.068 | 0.396 | 0 B cells | LIME1     |
| 5970 AQP3.3    | 0 | -1.11432 | 0.03  | 0.306 | 0 B cells | AQP3      |
| 5971 VSIR.2    | 0 | -1.11653 | 0.152 | 0.492 | 0 B cells | VSIR      |
| 5972 FLT3LG.3  | 0 | -1.1364  | 0.128 | 0.481 | 0 B cells | FLT3LG    |
| 5973 MAL.3     | 0 | -1.147   | 0.04  | 0.348 | 0 B cells | MAL       |
| 5974 XBP1.2    | 0 | -1.17886 | 0.132 | 0.448 | 0 B cells | XBP1      |
| 5975 CISH.2    | 0 | -1.19051 | 0.027 | 0.262 | 0 B cells | CISH      |
| 5976 CLIC3.2   | 0 | -1.19422 | 0.008 | 0.142 | 0 B cells | CLIC3     |
| 5977 LINC02446 | 0 | -1.20006 | 0.017 | 0.173 | 0 B cells | LINC02446 |
| 5978 NUCB2.3   | 0 | -1.21071 | 0.072 | 0.462 | 0 B cells | NUCB2     |
| 5979 CD8A.3    | 0 | -1.22277 | 0.016 | 0.225 | 0 B cells | CD8A      |
| 5980 PIM1.2    | 0 | -1.22278 | 0.153 | 0.515 | 0 B cells | PIM1      |
| 5981 ZYX.2     | 0 | -1.22335 | 0.121 | 0.49  | 0 B cells | ZYX       |
| 5982 LCP2.1    | 0 | -1.23544 | 0.052 | 0.461 | 0 B cells | LCP2      |
| 5983 CAMK4.3   | 0 | -1.24026 | 0.049 | 0.402 | 0 B cells | CAMK4     |
| 5984 CD27.3    | 0 | -1.25169 | 0.144 | 0.516 | 0 B cells | CD27      |
| 5985 ITGB2.3   | 0 | -1.25762 | 0.408 | 0.73  | 0 B cells | ITGB2     |
| 5986 TSPO.2    | 0 | -1.25874 | 0.302 | 0.54  | 0 B cells | TSPO      |
| 5987 VIM.2     | 0 | -1.28108 | 0.628 | 0.878 | 0 B cells | VIM       |
| 5988 ITM2A.2   | 0 | -1.30276 | 0.074 | 0.451 | 0 B cells | ITM2A     |
| 5989 RARRES3.2 | 0 | -1.33117 | 0.249 | 0.663 | 0 B cells | RARRES3   |
| 5990 CD2.3     | 0 | -1.34312 | 0.034 | 0.42  | 0 B cells | CD2       |
| 5991 SAMHD1.3  | 0 | -1.34397 | 0.099 | 0.527 | 0 B cells | SAMHD1    |
| 5992 LEPROTL1. | 0 | -1.39937 | 0.148 | 0.625 | 0 B cells | LEPROTL1  |
| 5993 ZAP70.3   | 0 | -1.4205  | 0.055 | 0.486 | 0 B cells | ZAP70     |
| 5994 KLRB1.2   | 0 | -1.42852 | 0.007 | 0.159 | 0 B cells | KLRB1     |

|                 |   |          |       |       |           |           |
|-----------------|---|----------|-------|-------|-----------|-----------|
| 5995 MT2A.1     | 0 | -1.43446 | 0.109 | 0.445 | 0 B cells | MT2A      |
| 5996 TIMP1.2    | 0 | -1.45562 | 0.041 | 0.305 | 0 B cells | TIMP1     |
| 5997 IFITM2.3   | 0 | -1.52788 | 0.703 | 0.869 | 0 B cells | IFITM2    |
| 5998 RGS10.2    | 0 | -1.5321  | 0.172 | 0.657 | 0 B cells | RGS10     |
| 5999 SELPLG.2   | 0 | -1.55151 | 0.077 | 0.598 | 0 B cells | SELPLG    |
| 6000 FCGR3A.3   | 0 | -1.63629 | 0.003 | 0.163 | 0 B cells | FCGR3A    |
| 6001 FGFBP2.3   | 0 | -1.64115 | 0.004 | 0.134 | 0 B cells | FGFBP2    |
| 6002 GZMH.2     | 0 | -1.68552 | 0.003 | 0.134 | 0 B cells | GZMH      |
| 6003 CD3G.3     | 0 | -1.69366 | 0.046 | 0.538 | 0 B cells | CD3G      |
| 6004 LAT.3      | 0 | -1.69411 | 0.047 | 0.556 | 0 B cells | LAT       |
| 6005 NOSIP.3    | 0 | -1.69454 | 0.308 | 0.747 | 0 B cells | NOSIP     |
| 6006 TRBC1.3    | 0 | -1.69526 | 0.046 | 0.394 | 0 B cells | TRBC1     |
| 6007 LDHB.2     | 0 | -1.7053  | 0.495 | 0.829 | 0 B cells | LDHB      |
| 6008 S100A10.2  | 0 | -1.70729 | 0.3   | 0.733 | 0 B cells | S100A10   |
| 6009 GZMA.2     | 0 | -1.71509 | 0.005 | 0.183 | 0 B cells | GZMA      |
| 6010 FCN1.3     | 0 | -1.72671 | 0.006 | 0.141 | 0 B cells | FCN1      |
| 6011 IFITM3.3   | 0 | -1.73495 | 0.378 | 0.61  | 0 B cells | IFITM3    |
| 6012 CD247.3    | 0 | -1.73927 | 0.044 | 0.503 | 0 B cells | CD247     |
| 6013 GZMM.3     | 0 | -1.81569 | 0.042 | 0.537 | 0 B cells | GZMM      |
| 6014 CD8B.3     | 0 | -1.83334 | 0.024 | 0.267 | 0 B cells | CD8B      |
| 6015 LCK.3      | 0 | -1.84385 | 0.155 | 0.699 | 0 B cells | LCK       |
| 6016 SERPINA1.1 | 0 | -1.851   | 0.008 | 0.15  | 0 B cells | SERPINA1  |
| 6017 LEF1.3     | 0 | -1.86432 | 0.069 | 0.557 | 0 B cells | LEF1      |
| 6018 SRGN.2     | 0 | -1.87757 | 0.111 | 0.508 | 0 B cells | SRGN      |
| 6019 LINC00861  | 0 | -1.90676 | 0.052 | 0.588 | 0 B cells | LINC00861 |
| 6020 TCF7.3     | 0 | -1.91372 | 0.061 | 0.538 | 0 B cells | TCF7      |
| 6021 ANXA1.3    | 0 | -2.07504 | 0.028 | 0.463 | 0 B cells | ANXA1     |
| 6022 CTSW.3     | 0 | -2.17058 | 0.023 | 0.334 | 0 B cells | CTSW      |
| 6023 PRF1.3     | 0 | -2.1782  | 0.008 | 0.233 | 0 B cells | PRF1      |
| 6024 FYB1.3     | 0 | -2.19106 | 0.066 | 0.747 | 0 B cells | FYB1      |
| 6025 GIMAP4.3   | 0 | -2.20271 | 0.062 | 0.746 | 0 B cells | GIMAP4    |
| 6026 LGALS1.2   | 0 | -2.22573 | 0.064 | 0.288 | 0 B cells | LGALS1    |
| 6027 AIF1.3     | 0 | -2.26528 | 0.041 | 0.373 | 0 B cells | AIF1      |
| 6028 CST7.1     | 0 | -2.36719 | 0.009 | 0.226 | 0 B cells | CST7      |
| 6029 HCST.2     | 0 | -2.37589 | 0.133 | 0.801 | 0 B cells | HCST      |
| 6030 GZMB.2     | 0 | -2.38146 | 0.004 | 0.143 | 0 B cells | GZMB      |
| 6031 IL7R.3     | 0 | -2.38486 | 0.089 | 0.6   | 0 B cells | IL7R      |
| 6032 CD3D.3     | 0 | -2.39566 | 0.066 | 0.7   | 0 B cells | CD3D      |
| 6033 IFITM1.3   | 0 | -2.3993  | 0.505 | 0.906 | 0 B cells | IFITM1    |
| 6034 S100A11.1  | 0 | -2.46628 | 0.217 | 0.556 | 0 B cells | S100A11   |
| 6035 GIMAP7.3   | 0 | -2.50868 | 0.073 | 0.819 | 0 B cells | GIMAP7    |
| 6036 S100A6.3   | 0 | -2.54103 | 0.422 | 0.866 | 0 B cells | S100A6    |
| 6037 FCER1G.2   | 0 | -2.60139 | 0.016 | 0.294 | 0 B cells | FCER1G    |
| 6038 LYZ.2      | 0 | -2.66226 | 0.029 | 0.168 | 0 B cells | LYZ       |
| 6039 CST3.3     | 0 | -2.67917 | 0.02  | 0.187 | 0 B cells | CST3      |
| 6040 CD7.3      | 0 | -2.78568 | 0.066 | 0.753 | 0 B cells | CD7       |
| 6041 CCL5.3     | 0 | -2.7951  | 0.019 | 0.194 | 0 B cells | CCL5      |

|      |           |           |          |       |       |           |         |          |
|------|-----------|-----------|----------|-------|-------|-----------|---------|----------|
| 6042 | S100A4.3  | 0         | -2.80544 | 0.258 | 0.637 | 0         | B cells | S100A4   |
| 6043 | CD3E.3    | 0         | -2.90778 | 0.078 | 0.78  | 0         | B cells | CD3E     |
| 6044 | TYROBP.2  | 0         | -3.05671 | 0.02  | 0.267 | 0         | B cells | TYROBP   |
| 6045 | IL32.3    | 0         | -3.06103 | 0.077 | 0.739 | 0         | B cells | IL32     |
| 6046 | GNLY.2    | 0         | -3.34586 | 0.008 | 0.134 | 0         | B cells | GNLY     |
| 6047 | NKG7.2    | 0         | -3.75005 | 0.021 | 0.267 | 0         | B cells | NKG7     |
| 6048 | UBL5.1    | 2.69E-307 | -0.45919 | 0.606 | 0.783 | 5.04E-303 | B cells | UBL5     |
| 6049 | DNAJB1.2  | 8.47E-307 | -0.50472 | 0.145 | 0.331 | 1.59E-302 | B cells | DNAJB1   |
| 6050 | ODC1.2    | 1.58E-306 | 0.53796  | 0.265 | 0.127 | 2.97E-302 | B cells | ODC1     |
| 6051 | PTMA.1    | 4.56E-306 | 0.268314 | 0.998 | 0.985 | 8.56E-302 | B cells | PTMA     |
| 6052 | FOXP1.2   | 5.76E-306 | 0.592956 | 0.54  | 0.398 | 1.08E-301 | B cells | FOXP1    |
| 6053 | FCRL3     | 8.94E-304 | 0.441202 | 0.138 | 0.039 | 1.68E-299 | B cells | FCRL3    |
| 6054 | IL2RB     | 3.81E-302 | -0.60812 | 0.004 | 0.117 | 7.15E-298 | B cells | IL2RB    |
| 6055 | PDE4B.2   | 1.98E-301 | 0.566956 | 0.27  | 0.133 | 3.71E-297 | B cells | PDE4B    |
| 6056 | CFD.1     | 3.29E-301 | -1.01418 | 0.009 | 0.125 | 6.18E-297 | B cells | CFD      |
| 6057 | NUAK2.2   | 6.30E-301 | 0.524749 | 0.232 | 0.103 | 1.18E-296 | B cells | NUAK2    |
| 6058 | RPS12.3   | 1.75E-300 | -0.25969 | 1     | 0.993 | 3.29E-296 | B cells | RPS12    |
| 6059 | ALDOA.2   | 1.13E-299 | -0.63099 | 0.516 | 0.686 | 2.12E-295 | B cells | ALDOA    |
| 6060 | SIPA1L3   | 5.33E-297 | 0.342792 | 0.104 | 0.024 | 1.00E-292 | B cells | SIPA1L3  |
| 6061 | TMEM176B  | 7.20E-297 | -0.92241 | 0.002 | 0.112 | 1.35E-292 | B cells | TMEM176B |
| 6062 | CMTM3.1   | 8.76E-296 | -0.43803 | 0.033 | 0.167 | 1.65E-291 | B cells | CMTM3    |
| 6063 | ITGAL.2   | 8.43E-294 | -0.47535 | 0.046 | 0.186 | 1.58E-289 | B cells | ITGAL    |
| 6064 | YBX3.1    | 7.59E-291 | 0.580556 | 0.183 | 0.072 | 1.43E-286 | B cells | YBX3     |
| 6065 | PPA1.2    | 1.18E-290 | -0.48226 | 0.232 | 0.428 | 2.22E-286 | B cells | PPA1     |
| 6066 | DOPEY2    | 6.34E-290 | 0.411344 | 0.149 | 0.049 | 1.19E-285 | B cells | DOPEY2   |
| 6067 | SPON2.1   | 2.12E-288 | -1.21167 | 0.012 | 0.127 | 3.99E-284 | B cells | SPON2    |
| 6068 | PTPRE.2   | 1.65E-287 | -0.49709 | 0.035 | 0.168 | 3.10E-283 | B cells | PTPRE    |
| 6069 | TESPA1.2  | 3.52E-287 | -0.46838 | 0.051 | 0.192 | 6.61E-283 | B cells | TESPA1   |
| 6070 | HSPA1A.2  | 6.56E-287 | -0.49601 | 0.053 | 0.195 | 1.23E-282 | B cells | HSPA1A   |
| 6071 | PPP2R5C.2 | 7.06E-287 | -0.53974 | 0.09  | 0.248 | 1.33E-282 | B cells | PPP2R5C  |
| 6072 | GPRIN3    | 5.22E-286 | -0.39135 | 0.012 | 0.127 | 9.80E-282 | B cells | GPRIN3   |
| 6073 | ELOB.1    | 6.22E-286 | -0.45357 | 0.633 | 0.791 | 1.17E-281 | B cells | ELOB     |
| 6074 | LILRA5.1  | 6.78E-286 | -0.76897 | 0.003 | 0.109 | 1.27E-281 | B cells | LILRA5   |
| 6075 | MNDA.2    | 8.41E-286 | -1.11877 | 0.024 | 0.145 | 1.58E-281 | B cells | MNDA     |
| 6076 | EFHD2.2   | 9.88E-286 | -0.59093 | 0.048 | 0.186 | 1.86E-281 | B cells | EFHD2    |
| 6077 | PAXX.2    | 1.38E-285 | -0.52305 | 0.394 | 0.6   | 2.59E-281 | B cells | PAXX     |
| 6078 | CFLAR.2   | 2.94E-285 | -0.52534 | 0.138 | 0.309 | 5.52E-281 | B cells | CFLAR    |
| 6079 | CLEC12A.1 | 3.00E-284 | -0.53668 | 0.001 | 0.106 | 5.63E-280 | B cells | CLEC12A  |
| 6080 | GBP1.2    | 3.03E-282 | -0.43414 | 0.033 | 0.162 | 5.70E-278 | B cells | GBP1     |
| 6081 | ATP6V0E2  | 3.40E-282 | -0.45875 | 0.09  | 0.249 | 6.39E-278 | B cells | ATP6V0E2 |
| 6082 | LYAR.2    | 7.20E-282 | -0.63626 | 0.058 | 0.2   | 1.35E-277 | B cells | LYAR     |
| 6083 | FKBP5.2   | 5.01E-281 | -0.41374 | 0.044 | 0.18  | 9.41E-277 | B cells | FKBP5    |
| 6084 | SERF2.2   | 2.25E-280 | -0.32206 | 0.978 | 0.99  | 4.22E-276 | B cells | SERF2    |
| 6085 | CKLF.1    | 2.57E-280 | -0.53976 | 0.125 | 0.294 | 4.83E-276 | B cells | CKLF     |
| 6086 | FLNA.3    | 7.53E-279 | -0.65531 | 0.221 | 0.397 | 1.42E-274 | B cells | FLNA     |
| 6087 | GUK1      | 5.25E-278 | -0.48672 | 0.467 | 0.655 | 9.86E-274 | B cells | GUK1     |
| 6088 | CD14.1    | 5.51E-278 | -1.16187 | 0.003 | 0.107 | 1.03E-273 | B cells | CD14     |



|      |           |           |          |       |       |           |         |            |
|------|-----------|-----------|----------|-------|-------|-----------|---------|------------|
| 6089 | CD63.2    | 5.55E-277 | -0.66891 | 0.113 | 0.271 | 1.04E-272 | B cells | CD63       |
| 6090 | HLA-A.2   | 9.05E-277 | -0.42829 | 0.84  | 0.925 | 1.70E-272 | B cells | HLA-A      |
| 6091 | CHD9.1    | 1.48E-276 | 0.523172 | 0.257 | 0.128 | 2.78E-272 | B cells | CHD9       |
| 6092 | CYBA.3    | 8.37E-275 | 0.3856   | 0.817 | 0.701 | 1.57E-270 | B cells | CYBA       |
| 6093 | BLVRA.2   | 1.04E-274 | -0.40698 | 0.019 | 0.135 | 1.96E-270 | B cells | BLVRA      |
| 6094 | CAPN2.2   | 2.82E-274 | -0.4752  | 0.087 | 0.24  | 5.30E-270 | B cells | CAPN2      |
| 6095 | MS4A6A.1  | 6.00E-274 | -0.75331 | 0.008 | 0.116 | 1.13E-269 | B cells | MS4A6A     |
| 6096 | ETHE1.1   | 9.06E-272 | -0.42073 | 0.091 | 0.246 | 1.70E-267 | B cells | ETHE1      |
| 6097 | ERP29     | 1.17E-271 | 0.43374  | 0.768 | 0.704 | 2.20E-267 | B cells | ERP29      |
| 6098 | RHBDF2    | 6.06E-271 | 0.447813 | 0.184 | 0.074 | 1.14E-266 | B cells | RHBDF2     |
| 6099 | UBE2J1.2  | 9.57E-270 | 0.539167 | 0.362 | 0.219 | 1.80E-265 | B cells | UBE2J1     |
| 6100 | MAPKAPK3  | 1.49E-269 | -0.42928 | 0.067 | 0.21  | 2.79E-265 | B cells | MAPKAPK3   |
| 6101 | CLEC2B    | 5.32E-269 | -0.52688 | 0.238 | 0.43  | 9.99E-265 | B cells | CLEC2B     |
| 6102 | CHRM3-AS  | 5.63E-269 | -0.41722 | 0.013 | 0.122 | 1.06E-264 | B cells | CHRM3-AS2  |
| 6103 | PARVB.2   | 1.06E-267 | 0.40065  | 0.177 | 0.071 | 2.00E-263 | B cells | PARVB      |
| 6104 | RNF125.2  | 2.25E-267 | -0.42781 | 0.045 | 0.177 | 4.23E-263 | B cells | RNF125     |
| 6105 | SMIM25.1  | 3.43E-267 | -0.80557 | 0.002 | 0.101 | 6.45E-263 | B cells | SMIM25     |
| 6106 | MLLT3.3   | 1.42E-266 | -0.40218 | 0.024 | 0.142 | 2.67E-262 | B cells | MLLT3      |
| 6107 | DUS2      | 5.66E-266 | 0.326093 | 0.118 | 0.033 | 1.06E-261 | B cells | DUS2       |
| 6108 | IL6R.1    | 9.29E-266 | -0.34491 | 0.009 | 0.114 | 1.75E-261 | B cells | IL6R       |
| 6109 | TNFSF13B  | 3.59E-265 | -0.5326  | 0.013 | 0.121 | 6.75E-261 | B cells | TNFSF13B   |
| 6110 | GNG2.1    | 5.60E-265 | -0.52603 | 0.141 | 0.308 | 1.05E-260 | B cells | GNG2       |
| 6111 | RABEP2    | 2.37E-263 | 0.400974 | 0.151 | 0.053 | 4.46E-259 | B cells | RABEP2     |
| 6112 | EIF1.3    | 1.06E-262 | -0.27713 | 0.959 | 0.983 | 1.99E-258 | B cells | EIF1       |
| 6113 | AC025164  | 3.36E-262 | 0.530277 | 0.245 | 0.12  | 6.32E-258 | B cells | AC025164.1 |
| 6114 | S100A9.2  | 1.73E-261 | -4.53482 | 0.116 | 0.261 | 3.25E-257 | B cells | S100A9     |
| 6115 | ATP10D    | 2.44E-261 | 0.376325 | 0.109 | 0.03  | 4.58E-257 | B cells | ATP10D     |
| 6116 | TRAF5.2   | 2.75E-261 | 0.463195 | 0.231 | 0.108 | 5.16E-257 | B cells | TRAF5      |
| 6117 | CD44.2    | 3.22E-261 | -0.47703 | 0.294 | 0.488 | 6.04E-257 | B cells | CD44       |
| 6118 | ATP5PD.1  | 1.20E-260 | -0.42616 | 0.403 | 0.602 | 2.26E-256 | B cells | ATP5PD     |
| 6119 | BTN2A2    | 7.08E-260 | 0.326516 | 0.101 | 0.025 | 1.33E-255 | B cells | BTN2A2     |
| 6120 | TECR.2    | 7.78E-259 | -0.45018 | 0.297 | 0.494 | 1.46E-254 | B cells | TECR       |
| 6121 | CORO1B.1  | 1.04E-258 | -0.52028 | 0.187 | 0.359 | 1.96E-254 | B cells | CORO1B     |
| 6122 | PCBP1.3   | 1.52E-258 | -0.35487 | 0.809 | 0.897 | 2.86E-254 | B cells | PCBP1      |
| 6123 | DNAJC10   | 5.13E-258 | 0.488576 | 0.216 | 0.101 | 9.63E-254 | B cells | DNAJC10    |
| 6124 | RIPOR1    | 5.50E-258 | 0.37232  | 0.134 | 0.044 | 1.03E-253 | B cells | RIPOR1     |
| 6125 | TRDC      | 2.13E-257 | -0.83811 | 0.004 | 0.102 | 4.01E-253 | B cells | TRDC       |
| 6126 | PECAM1.1  | 1.45E-256 | -0.48223 | 0.069 | 0.209 | 2.72E-252 | B cells | PECAM1     |
| 6127 | SNX8      | 5.79E-256 | 0.343662 | 0.112 | 0.032 | 1.09E-251 | B cells | SNX8       |
| 6128 | SERINC5.1 | 1.42E-255 | -0.37991 | 0.026 | 0.142 | 2.67E-251 | B cells | SERINC5    |
| 6129 | BNIP3.2   | 1.45E-254 | -0.40253 | 0.069 | 0.209 | 2.72E-250 | B cells | BNIP3      |
| 6130 | DUSP2.1   | 1.67E-254 | -0.88538 | 0.045 | 0.169 | 3.14E-250 | B cells | DUSP2      |
| 6131 | UQCRCQ.2  | 2.01E-253 | -0.44376 | 0.338 | 0.53  | 3.77E-249 | B cells | UQCRCQ     |
| 6132 | TACC3.1   | 2.07E-253 | -0.4058  | 0.088 | 0.235 | 3.89E-249 | B cells | TACC3      |
| 6133 | PFKL      | 1.55E-252 | 0.538194 | 0.375 | 0.243 | 2.91E-248 | B cells | PFKL       |
| 6134 | S100A12.2 | 2.93E-252 | -3.12271 | 0.028 | 0.141 | 5.50E-248 | B cells | S100A12    |
| 6135 | CAPZB.2   | 1.38E-251 | -0.40026 | 0.617 | 0.778 | 2.59E-247 | B cells | CAPZB      |

|      |           |           |          |       |       |           |         |          |
|------|-----------|-----------|----------|-------|-------|-----------|---------|----------|
| 6136 | PDE3B.3   | 3.06E-251 | -0.40764 | 0.049 | 0.179 | 5.74E-247 | B cells | PDE3B    |
| 6137 | STAT1.1   | 3.90E-250 | -0.52251 | 0.161 | 0.328 | 7.32E-246 | B cells | STAT1    |
| 6138 | IL17RA.1  | 6.68E-250 | -0.42883 | 0.052 | 0.181 | 1.26E-245 | B cells | IL17RA   |
| 6139 | SKAP2.2   | 7.35E-250 | 0.464305 | 0.23  | 0.111 | 1.38E-245 | B cells | SKAP2    |
| 6140 | CCND2.2   | 6.82E-249 | -0.44833 | 0.049 | 0.174 | 1.28E-244 | B cells | CCND2    |
| 6141 | TSEN54.2  | 1.10E-248 | -0.45913 | 0.067 | 0.202 | 2.07E-244 | B cells | TSEN54   |
| 6142 | LCP1.2    | 9.31E-248 | -0.56696 | 0.46  | 0.627 | 1.75E-243 | B cells | LCP1     |
| 6143 | DNMT1.1   | 2.30E-247 | -0.40636 | 0.101 | 0.253 | 4.32E-243 | B cells | DNMT1    |
| 6144 | CYTOR.3   | 3.54E-247 | -0.3995  | 0.021 | 0.13  | 6.66E-243 | B cells | CYTOR    |
| 6145 | JUN.1     | 3.88E-247 | 0.668699 | 0.261 | 0.137 | 7.29E-243 | B cells | JUN      |
| 6146 | TSPAN32.1 | 4.42E-247 | -0.41099 | 0.048 | 0.174 | 8.30E-243 | B cells | TSPAN32  |
| 6147 | MT-ND4L.1 | 1.07E-246 | 0.327657 | 0.973 | 0.945 | 2.01E-242 | B cells | MT-ND4L  |
| 6148 | RELB      | 1.14E-246 | 0.480836 | 0.205 | 0.094 | 2.14E-242 | B cells | RELB     |
| 6149 | C4orf48.2 | 1.46E-246 | -0.53479 | 0.179 | 0.343 | 2.75E-242 | B cells | C4orf48  |
| 6150 | GRB2.1    | 4.27E-246 | 0.483093 | 0.508 | 0.376 | 8.01E-242 | B cells | GRB2     |
| 6151 | RHOG.2    | 4.43E-246 | -0.53614 | 0.386 | 0.559 | 8.33E-242 | B cells | RHOG     |
| 6152 | MYC.2     | 1.21E-245 | -0.67976 | 0.284 | 0.446 | 2.27E-241 | B cells | MYC      |
| 6153 | SH3BP1.1  | 2.97E-245 | -0.40985 | 0.086 | 0.229 | 5.58E-241 | B cells | SH3BP1   |
| 6154 | SEC61G.3  | 5.56E-245 | -0.47079 | 0.373 | 0.563 | 1.04E-240 | B cells | SEC61G   |
| 6155 | FLOT1.1   | 6.27E-245 | -0.44452 | 0.163 | 0.331 | 1.18E-240 | B cells | FLOT1    |
| 6156 | PLBD1.1   | 8.36E-245 | -0.68516 | 0.006 | 0.101 | 1.57E-240 | B cells | PLBD1    |
| 6157 | STXBP2.2  | 8.73E-245 | -1.26148 | 0.087 | 0.221 | 1.64E-240 | B cells | STXBP2   |
| 6158 | CCL4.2    | 1.81E-244 | -1.32389 | 0.024 | 0.133 | 3.40E-240 | B cells | CCL4     |
| 6159 | NDUFA12   | 4.52E-244 | -0.43069 | 0.416 | 0.605 | 8.50E-240 | B cells | NDUFA12  |
| 6160 | RBMS1.2   | 1.93E-243 | -0.39828 | 0.077 | 0.218 | 3.63E-239 | B cells | RBMS1    |
| 6161 | ITPR1     | 2.44E-243 | 0.372084 | 0.122 | 0.039 | 4.57E-239 | B cells | ITPR1    |
| 6162 | FGL2.1    | 2.01E-242 | -0.58134 | 0.019 | 0.125 | 3.77E-238 | B cells | FGL2     |
| 6163 | S100A8.2  | 2.04E-242 | -5.21137 | 0.135 | 0.276 | 3.83E-238 | B cells | S100A8   |
| 6164 | TGFB1.2   | 5.51E-242 | -0.46443 | 0.164 | 0.329 | 1.04E-237 | B cells | TGFB1    |
| 6165 | PRKCB.2   | 7.52E-242 | 0.530061 | 0.286 | 0.16  | 1.41E-237 | B cells | PRKCB    |
| 6166 | NDUFA4.2  | 1.05E-241 | -0.37869 | 0.597 | 0.758 | 1.96E-237 | B cells | NDUFA4   |
| 6167 | SLC11A1.1 | 2.25E-241 | -0.57275 | 0.016 | 0.119 | 4.23E-237 | B cells | SLC11A1  |
| 6168 | SH3BGRL3  | 4.20E-241 | -0.70176 | 0.918 | 0.948 | 7.89E-237 | B cells | SH3BGRL3 |
| 6169 | STK38.1   | 1.51E-240 | -0.43561 | 0.188 | 0.36  | 2.84E-236 | B cells | STK38    |
| 6170 | SUN2.2    | 2.79E-240 | -0.44505 | 0.162 | 0.329 | 5.24E-236 | B cells | SUN2     |
| 6171 | RASSF5.2  | 1.09E-239 | -0.42943 | 0.18  | 0.35  | 2.06E-235 | B cells | RASSF5   |
| 6172 | LYL1.1    | 1.79E-239 | 0.360049 | 0.102 | 0.028 | 3.36E-235 | B cells | LYL1     |
| 6173 | CD53.1    | 5.04E-238 | 0.445598 | 0.659 | 0.571 | 9.47E-234 | B cells | CD53     |
| 6174 | LILRB2.1  | 6.34E-237 | -0.69254 | 0.012 | 0.11  | 1.19E-232 | B cells | LILRB2   |
| 6175 | PLCG1.2   | 6.51E-237 | -0.37003 | 0.024 | 0.13  | 1.22E-232 | B cells | PLCG1    |
| 6176 | TMEM243   | 1.40E-236 | 0.509378 | 0.49  | 0.368 | 2.64E-232 | B cells | TMEM243  |
| 6177 | MCL1.2    | 7.10E-236 | -0.47359 | 0.222 | 0.399 | 1.33E-231 | B cells | MCL1     |
| 6178 | GNPDA1    | 7.30E-236 | -0.35327 | 0.033 | 0.147 | 1.37E-231 | B cells | GNPDA1   |
| 6179 | FKBP11.2  | 8.67E-236 | -0.53208 | 0.077 | 0.209 | 1.63E-231 | B cells | FKBP11   |
| 6180 | RTN3.2    | 7.81E-234 | -0.40002 | 0.079 | 0.216 | 1.47E-229 | B cells | RTN3     |
| 6181 | DGCR6L.1  | 1.11E-233 | -0.37951 | 0.138 | 0.3   | 2.08E-229 | B cells | DGCR6L   |
| 6182 | ARL11.1   | 1.41E-233 | 0.356933 | 0.11  | 0.033 | 2.66E-229 | B cells | ARL11    |

|      |            |           |          |       |       |           |         |           |
|------|------------|-----------|----------|-------|-------|-----------|---------|-----------|
| 6183 | H2AFJ.1    | 1.85E-233 | -0.42596 | 0.108 | 0.256 | 3.48E-229 | B cells | H2AFJ     |
| 6184 | CCR7.3     | 3.64E-233 | -0.71871 | 0.463 | 0.565 | 6.84E-229 | B cells | CCR7      |
| 6185 | WDR1       | 4.13E-233 | -0.46939 | 0.374 | 0.554 | 7.75E-229 | B cells | WDR1      |
| 6186 | DDAH2.2    | 2.43E-232 | 0.471898 | 0.244 | 0.126 | 4.56E-228 | B cells | DDAH2     |
| 6187 | MTPN.2     | 3.23E-232 | 0.49582  | 0.449 | 0.319 | 6.06E-228 | B cells | MTPN      |
| 6188 | TCEA3      | 5.73E-232 | -0.34679 | 0.01  | 0.105 | 1.08E-227 | B cells | TCEA3     |
| 6189 | IQGAP2.3   | 2.61E-231 | -0.36887 | 0.04  | 0.156 | 4.90E-227 | B cells | IQGAP2    |
| 6190 | SNRNP25.1  | 3.90E-231 | 0.475967 | 0.213 | 0.104 | 7.33E-227 | B cells | SNRNP25   |
| 6191 | ZNF92      | 4.07E-231 | 0.421511 | 0.158 | 0.063 | 7.64E-227 | B cells | ZNF92     |
| 6192 | COX6B1.2   | 7.82E-231 | -0.34445 | 0.715 | 0.848 | 1.47E-226 | B cells | COX6B1    |
| 6193 | GPR171     | 5.08E-230 | -0.37223 | 0.01  | 0.104 | 9.55E-226 | B cells | GPR171    |
| 6194 | SH3KBP1.1  | 5.41E-230 | -0.40905 | 0.161 | 0.322 | 1.02E-225 | B cells | SH3KBP1   |
| 6195 | TTC38      | 2.61E-228 | -0.51687 | 0.009 | 0.102 | 4.90E-224 | B cells | TTC38     |
| 6196 | SERPINB1.1 | 2.91E-227 | -0.60373 | 0.321 | 0.49  | 5.47E-223 | B cells | SERPINB1  |
| 6197 | JOSD2.1    | 4.25E-227 | -0.3489  | 0.06  | 0.186 | 7.98E-223 | B cells | JOSD2     |
| 6198 | SIDT2.1    | 6.38E-227 | 0.368792 | 0.146 | 0.056 | 1.20E-222 | B cells | SIDT2     |
| 6199 | LSM10      | 5.45E-225 | 0.539042 | 0.381 | 0.26  | 1.02E-220 | B cells | LSM10     |
| 6200 | GOLGA7.1   | 1.07E-224 | -0.37657 | 0.158 | 0.321 | 2.02E-220 | B cells | GOLGA7    |
| 6201 | SNX10.2    | 1.65E-223 | 0.460216 | 0.242 | 0.126 | 3.10E-219 | B cells | SNX10     |
| 6202 | PTPN4.1    | 2.28E-223 | -0.40794 | 0.053 | 0.173 | 4.28E-219 | B cells | PTPN4     |
| 6203 | LINC00623  | 6.31E-223 | -0.40733 | 0.064 | 0.189 | 1.18E-218 | B cells | LINC00623 |
| 6204 | ETS1.3     | 7.58E-223 | -0.47847 | 0.225 | 0.39  | 1.42E-218 | B cells | ETS1      |
| 6205 | COPS9.1    | 1.62E-222 | -0.37035 | 0.252 | 0.435 | 3.04E-218 | B cells | COPS9     |
| 6206 | SULT1A1.1  | 2.76E-222 | -0.32754 | 0.01  | 0.101 | 5.18E-218 | B cells | SULT1A1   |
| 6207 | PSME2.2    | 6.56E-222 | -0.4937  | 0.54  | 0.689 | 1.23E-217 | B cells | PSME2     |
| 6208 | LPAR6      | 1.02E-221 | -0.32888 | 0.009 | 0.1   | 1.91E-217 | B cells | LPAR6     |
| 6209 | GRAP2.3    | 5.68E-221 | -0.41151 | 0.054 | 0.174 | 1.07E-216 | B cells | GRAP2     |
| 6210 | KLRG1      | 1.77E-220 | -0.52383 | 0.016 | 0.11  | 3.32E-216 | B cells | KLRG1     |
| 6211 | ATP2A3.1   | 2.91E-220 | 0.46744  | 0.278 | 0.157 | 5.46E-216 | B cells | ATP2A3    |
| 6212 | MCM5.1     | 7.78E-220 | 0.435141 | 0.227 | 0.115 | 1.46E-215 | B cells | MCM5      |
| 6213 | RASA3.3    | 8.69E-220 | -0.40457 | 0.1   | 0.239 | 1.63E-215 | B cells | RASA3     |
| 6214 | FTL.2      | 1.33E-219 | -0.68632 | 0.999 | 0.991 | 2.50E-215 | B cells | FTL       |
| 6215 | CISD3.1    | 1.65E-219 | -0.42349 | 0.087 | 0.22  | 3.11E-215 | B cells | CISD3     |
| 6216 | DMXL1      | 2.27E-219 | 0.4389   | 0.183 | 0.083 | 4.26E-215 | B cells | DMXL1     |
| 6217 | ZNF821     | 1.70E-218 | 0.301359 | 0.103 | 0.03  | 3.20E-214 | B cells | ZNF821    |
| 6218 | TMEM123    | 3.40E-218 | -0.39306 | 0.321 | 0.51  | 6.39E-214 | B cells | TMEM123   |
| 6219 | PLEKHF1.1  | 6.48E-218 | -0.41814 | 0.019 | 0.116 | 1.22E-213 | B cells | PLEKHF1   |
| 6220 | PASK.1     | 1.20E-217 | -0.49156 | 0.038 | 0.147 | 2.25E-213 | B cells | PASK      |
| 6221 | DPYD.2     | 1.23E-216 | -0.37771 | 0.104 | 0.247 | 2.31E-212 | B cells | DPYD      |
| 6222 | TRG-AS1    | 7.45E-215 | -0.34628 | 0.011 | 0.101 | 1.40E-210 | B cells | TRG-AS1   |
| 6223 | PIK3AP1.1  | 2.52E-214 | 0.39187  | 0.165 | 0.07  | 4.73E-210 | B cells | PIK3AP1   |
| 6224 | FAM107B.1  | 3.80E-214 | -0.38973 | 0.16  | 0.314 | 7.13E-210 | B cells | FAM107B   |
| 6225 | MINOS1.1   | 2.62E-213 | -0.39317 | 0.259 | 0.435 | 4.93E-209 | B cells | MINOS1    |
| 6226 | APOL6.1    | 8.05E-212 | -0.32327 | 0.024 | 0.123 | 1.51E-207 | B cells | APOL6     |
| 6227 | ATP6V1G1   | 2.29E-211 | 0.355268 | 0.815 | 0.782 | 4.30E-207 | B cells | ATP6V1G1  |
| 6228 | NDUFB1.1   | 6.76E-211 | -0.39636 | 0.282 | 0.463 | 1.27E-206 | B cells | NDUFB1    |
| 6229 | ACP5       | 1.91E-210 | 0.527028 | 0.26  | 0.148 | 3.59E-206 | B cells | ACP5      |

|      |            |           |          |       |       |           |         |           |
|------|------------|-----------|----------|-------|-------|-----------|---------|-----------|
| 6230 | ANXA2R.3   | 3.27E-210 | -0.41546 | 0.154 | 0.306 | 6.14E-206 | B cells | ANXA2R    |
| 6231 | CITED2     | 1.42E-209 | -0.36301 | 0.087 | 0.219 | 2.67E-205 | B cells | CITED2    |
| 6232 | IFI6.1     | 9.80E-209 | -0.39067 | 0.065 | 0.186 | 1.84E-204 | B cells | IFI6      |
| 6233 | RTN4.3     | 8.88E-208 | -0.39323 | 0.177 | 0.333 | 1.67E-203 | B cells | RTN4      |
| 6234 | ATP2B1     | 1.00E-207 | 0.493281 | 0.288 | 0.171 | 1.89E-203 | B cells | ATP2B1    |
| 6235 | NUCB1.1    | 2.37E-207 | -0.38896 | 0.216 | 0.381 | 4.46E-203 | B cells | NUCB1     |
| 6236 | INPP4A     | 1.33E-205 | -0.29499 | 0.014 | 0.103 | 2.50E-201 | B cells | INPP4A    |
| 6237 | CSK.2      | 2.19E-205 | 0.481503 | 0.568 | 0.478 | 4.11E-201 | B cells | CSK       |
| 6238 | SELENOF.1  | 9.89E-202 | 0.485586 | 0.526 | 0.434 | 1.86E-197 | B cells | SELENOF   |
| 6239 | ABI3.2     | 4.57E-201 | -0.50998 | 0.084 | 0.206 | 8.58E-197 | B cells | ABI3      |
| 6240 | TNFRSF1B.  | 9.51E-201 | -0.50089 | 0.07  | 0.185 | 1.79E-196 | B cells | TNFRSF1B  |
| 6241 | TRAF3IP3.3 | 6.28E-200 | -0.38727 | 0.54  | 0.703 | 1.18E-195 | B cells | TRAF3IP3  |
| 6242 | NDUFA1.2   | 6.32E-200 | -0.36192 | 0.493 | 0.667 | 1.19E-195 | B cells | NDUFA1    |
| 6243 | RASAL3.2   | 7.91E-200 | -0.4023  | 0.152 | 0.298 | 1.49E-195 | B cells | RASAL3    |
| 6244 | PAG1.2     | 1.23E-199 | -0.33022 | 0.045 | 0.152 | 2.31E-195 | B cells | PAG1      |
| 6245 | HSP90AA1   | 8.24E-199 | -0.40231 | 0.605 | 0.752 | 1.55E-194 | B cells | HSP90AA1  |
| 6246 | AP2S1.1    | 1.73E-198 | -0.44637 | 0.317 | 0.481 | 3.25E-194 | B cells | AP2S1     |
| 6247 | RNF130.3   | 2.58E-198 | -0.56899 | 0.07  | 0.184 | 4.84E-194 | B cells | RNF130    |
| 6248 | PPT1.2     | 2.61E-198 | -0.34575 | 0.13  | 0.273 | 4.91E-194 | B cells | PPT1      |
| 6249 | CDC25B.2   | 2.78E-198 | -0.40594 | 0.155 | 0.301 | 5.23E-194 | B cells | CDC25B    |
| 6250 | NDUFB2.1   | 1.36E-197 | -0.38651 | 0.515 | 0.683 | 2.55E-193 | B cells | NDUFB2    |
| 6251 | GM2A.1     | 3.29E-197 | 0.404742 | 0.147 | 0.062 | 6.19E-193 | B cells | GM2A      |
| 6252 | KYNU.1     | 4.89E-197 | 0.328184 | 0.122 | 0.045 | 9.20E-193 | B cells | KYNU      |
| 6253 | LRMP       | 1.67E-196 | 0.461565 | 0.201 | 0.102 | 3.14E-192 | B cells | LRMP      |
| 6254 | C12orf75.2 | 5.61E-196 | -0.59967 | 0.109 | 0.234 | 1.05E-191 | B cells | C12orf75  |
| 6255 | ATP2B4     | 1.34E-195 | -0.32815 | 0.018 | 0.106 | 2.52E-191 | B cells | ATP2B4    |
| 6256 | GSAP       | 1.33E-194 | 0.355638 | 0.147 | 0.061 | 2.50E-190 | B cells | GSAP      |
| 6257 | AKTIP.2    | 1.45E-194 | -0.32677 | 0.038 | 0.14  | 2.72E-190 | B cells | AKTIP     |
| 6258 | JAZF1      | 1.33E-193 | 0.366826 | 0.158 | 0.069 | 2.49E-189 | B cells | JAZF1     |
| 6259 | BATF       | 6.26E-193 | -0.37999 | 0.054 | 0.163 | 1.18E-188 | B cells | BATF      |
| 6260 | SERPINB6.1 | 1.05E-192 | -0.33198 | 0.048 | 0.154 | 1.97E-188 | B cells | SERPINB6  |
| 6261 | BOLA3.1    | 2.53E-192 | -0.3349  | 0.09  | 0.215 | 4.76E-188 | B cells | BOLA3     |
| 6262 | NCOA3.2    | 4.66E-192 | 0.448066 | 0.238 | 0.132 | 8.76E-188 | B cells | NCOA3     |
| 6263 | RAB27A.1   | 9.81E-192 | -0.32824 | 0.048 | 0.156 | 1.84E-187 | B cells | RAB27A    |
| 6264 | GNB5       | 1.57E-191 | 0.353746 | 0.152 | 0.065 | 2.95E-187 | B cells | GNB5      |
| 6265 | APBB1.2    | 9.74E-191 | -0.34652 | 0.049 | 0.155 | 1.83E-186 | B cells | APBB1     |
| 6266 | MTRNR2L1   | 1.84E-190 | 0.363375 | 0.956 | 0.94  | 3.46E-186 | B cells | MTRNR2L12 |
| 6267 | VPS26B     | 2.06E-190 | -0.30896 | 0.039 | 0.139 | 3.86E-186 | B cells | VPS26B    |
| 6268 | DEF6.2     | 5.93E-190 | -0.37325 | 0.224 | 0.383 | 1.11E-185 | B cells | DEF6      |
| 6269 | LAMTOR5.   | 7.13E-190 | 0.466613 | 0.47  | 0.369 | 1.34E-185 | B cells | LAMTOR5   |
| 6270 | LGALS3BP.  | 7.95E-190 | -0.31567 | 0.035 | 0.133 | 1.49E-185 | B cells | LGALS3BP  |
| 6271 | NRM        | 6.68E-189 | 0.334964 | 0.122 | 0.046 | 1.25E-184 | B cells | NRM       |
| 6272 | STAG3      | 1.41E-188 | 0.434176 | 0.111 | 0.039 | 2.65E-184 | B cells | STAG3     |
| 6273 | TNFSF10.1  | 2.43E-188 | -0.46388 | 0.135 | 0.271 | 4.57E-184 | B cells | TNFSF10   |
| 6274 | DGKD.1     | 2.96E-188 | 0.434269 | 0.222 | 0.119 | 5.55E-184 | B cells | DGKD      |
| 6275 | CERS4      | 9.69E-188 | 0.364235 | 0.149 | 0.064 | 1.82E-183 | B cells | CERS4     |
| 6276 | RAB5IF.1   | 1.91E-187 | -0.38863 | 0.182 | 0.329 | 3.58E-183 | B cells | RAB5IF    |

|      |            |           |          |       |       |           |         |           |
|------|------------|-----------|----------|-------|-------|-----------|---------|-----------|
| 6277 | NMRK1      | 2.04E-187 | -0.31009 | 0.047 | 0.151 | 3.84E-183 | B cells | NMRK1     |
| 6278 | RNASSET2.2 | 2.21E-187 | 0.322339 | 0.677 | 0.574 | 4.16E-183 | B cells | RNASSET2  |
| 6279 | LINC00665  | 4.30E-187 | 0.27689  | 0.103 | 0.034 | 8.08E-183 | B cells | LINC00665 |
| 6280 | CTSB.2     | 1.54E-186 | -0.51182 | 0.134 | 0.264 | 2.90E-182 | B cells | CTSB      |
| 6281 | ENO1.2     | 1.77E-186 | -0.38476 | 0.535 | 0.683 | 3.32E-182 | B cells | ENO1      |
| 6282 | MT1F       | 7.27E-186 | -0.32992 | 0.031 | 0.124 | 1.37E-181 | B cells | MT1F      |
| 6283 | CYB5R3.1   | 6.01E-185 | 0.465218 | 0.322 | 0.214 | 1.13E-180 | B cells | CYB5R3    |
| 6284 | CTSA.1     | 1.63E-184 | -0.39802 | 0.109 | 0.236 | 3.05E-180 | B cells | CTSA      |
| 6285 | PYHIN1     | 2.00E-184 | -0.41238 | 0.022 | 0.109 | 3.76E-180 | B cells | PYHIN1    |
| 6286 | MGST3.3    | 3.28E-184 | -0.33038 | 0.143 | 0.286 | 6.17E-180 | B cells | MGST3     |
| 6287 | PPM1M      | 3.70E-184 | -0.35616 | 0.119 | 0.249 | 6.95E-180 | B cells | PPM1M     |
| 6288 | KCNAB2.1   | 4.08E-183 | -0.32575 | 0.094 | 0.217 | 7.66E-179 | B cells | KCNAB2    |
| 6289 | CNIH4.2    | 6.18E-182 | -0.32566 | 0.094 | 0.218 | 1.16E-177 | B cells | CNIH4     |
| 6290 | BLCAP.2    | 6.45E-182 | 0.470997 | 0.31  | 0.201 | 1.21E-177 | B cells | BLCAP     |
| 6291 | TBC1D22A   | 7.23E-182 | 0.412535 | 0.205 | 0.108 | 1.36E-177 | B cells | TBC1D22A  |
| 6292 | TPI1.3     | 4.22E-181 | -0.4245  | 0.515 | 0.657 | 7.93E-177 | B cells | TPI1      |
| 6293 | CCNG2      | 4.34E-181 | 0.326535 | 0.114 | 0.042 | 8.15E-177 | B cells | CCNG2     |
| 6294 | MT-ND1.3   | 1.50E-180 | 0.286081 | 0.884 | 0.852 | 2.82E-176 | B cells | MT-ND1    |
| 6295 | RPL38.3    | 2.01E-180 | -0.32791 | 0.724 | 0.846 | 3.77E-176 | B cells | RPL38     |
| 6296 | CD1D.1     | 2.34E-180 | 0.316245 | 0.122 | 0.047 | 4.39E-176 | B cells | CD1D      |
| 6297 | ADD3.3     | 6.06E-180 | -0.38254 | 0.367 | 0.535 | 1.14E-175 | B cells | ADD3      |
| 6298 | MYADM.2    | 1.88E-179 | -0.36388 | 0.082 | 0.199 | 3.53E-175 | B cells | MYADM     |
| 6299 | PGK1.1     | 3.49E-179 | -0.35288 | 0.586 | 0.726 | 6.56E-175 | B cells | PGK1      |
| 6300 | SFXN1.1    | 4.65E-179 | -0.32915 | 0.079 | 0.194 | 8.74E-175 | B cells | SFXN1     |
| 6301 | IRF5.1     | 1.33E-178 | 0.348767 | 0.144 | 0.063 | 2.50E-174 | B cells | IRF5      |
| 6302 | COX7B.2    | 4.39E-178 | -0.36944 | 0.368 | 0.533 | 8.24E-174 | B cells | COX7B     |
| 6303 | MIS18BP1   | 1.18E-177 | 0.457349 | 0.265 | 0.161 | 2.22E-173 | B cells | MIS18BP1  |
| 6304 | CD68.2     | 5.20E-177 | -0.79195 | 0.036 | 0.126 | 9.77E-173 | B cells | CD68      |
| 6305 | ADD1       | 6.56E-177 | 0.442829 | 0.261 | 0.156 | 1.23E-172 | B cells | ADD1      |
| 6306 | PKM.1      | 8.52E-177 | -0.41836 | 0.501 | 0.652 | 1.60E-172 | B cells | PKM       |
| 6307 | MT-ND2.3   | 3.01E-176 | 0.330957 | 0.87  | 0.843 | 5.65E-172 | B cells | MT-ND2    |
| 6308 | TOB1       | 8.69E-176 | -0.28491 | 0.031 | 0.121 | 1.63E-171 | B cells | TOB1      |
| 6309 | BLVRB.2    | 1.37E-175 | -0.48308 | 0.06  | 0.163 | 2.57E-171 | B cells | BLVRB     |
| 6310 | SEPT1.3    | 2.91E-175 | -0.40098 | 0.475 | 0.614 | 5.47E-171 | B cells | Sep-01    |
| 6311 | HLA-C.2    | 3.54E-175 | -0.34429 | 0.972 | 0.987 | 6.65E-171 | B cells | HLA-C     |
| 6312 | SDF2L1.1   | 4.90E-175 | -0.39661 | 0.116 | 0.243 | 9.21E-171 | B cells | SDF2L1    |
| 6313 | TKT.2      | 5.16E-175 | -0.56056 | 0.397 | 0.548 | 9.69E-171 | B cells | TKT       |
| 6314 | SLC50A1.1  | 2.20E-173 | 0.456018 | 0.245 | 0.145 | 4.13E-169 | B cells | SLC50A1   |
| 6315 | CD151.1    | 2.78E-173 | -0.30474 | 0.037 | 0.129 | 5.22E-169 | B cells | CD151     |
| 6316 | PGD.3      | 3.34E-173 | -0.55445 | 0.129 | 0.251 | 6.28E-169 | B cells | PGD       |
| 6317 | C19orf38.1 | 4.10E-172 | -0.37793 | 0.028 | 0.115 | 7.70E-168 | B cells | C19orf38  |
| 6318 | ALKBH7.1   | 4.36E-171 | -0.34395 | 0.336 | 0.503 | 8.19E-167 | B cells | ALKBH7    |
| 6319 | CHD3.1     | 5.92E-171 | -0.32682 | 0.069 | 0.176 | 1.11E-166 | B cells | CHD3      |
| 6320 | SYNE2.3    | 6.72E-171 | -0.43335 | 0.092 | 0.206 | 1.26E-166 | B cells | SYNE2     |
| 6321 | LPAR5      | 7.06E-171 | 0.259703 | 0.101 | 0.035 | 1.33E-166 | B cells | LPAR5     |
| 6322 | PAK1.1     | 1.82E-170 | -0.29042 | 0.044 | 0.14  | 3.42E-166 | B cells | PAK1      |
| 6323 | TIFA       | 1.08E-169 | 0.388237 | 0.145 | 0.065 | 2.02E-165 | B cells | TIFA      |

|      |           |           |          |       |       |           |         |         |
|------|-----------|-----------|----------|-------|-------|-----------|---------|---------|
| 6324 | FERMT3.2  | 5.20E-169 | -0.38473 | 0.259 | 0.411 | 9.77E-165 | B cells | FERMT3  |
| 6325 | LINS1.2   | 5.54E-169 | -0.30557 | 0.058 | 0.16  | 1.04E-164 | B cells | LINS1   |
| 6326 | TRABD.1   | 4.62E-168 | -0.31626 | 0.25  | 0.409 | 8.68E-164 | B cells | TRABD   |
| 6327 | RP9.2     | 9.03E-168 | 0.432628 | 0.216 | 0.121 | 1.70E-163 | B cells | RP9     |
| 6328 | CYSLTR1   | 1.13E-167 | 0.361295 | 0.158 | 0.074 | 2.12E-163 | B cells | CYSLTR1 |
| 6329 | MBP.1     | 1.37E-167 | -0.41653 | 0.203 | 0.344 | 2.57E-163 | B cells | MBP     |
| 6330 | LIMS1.2   | 3.50E-167 | -0.35411 | 0.064 | 0.169 | 6.58E-163 | B cells | LIMS1   |
| 6331 | SMIM37.1  | 6.22E-167 | -0.32745 | 0.169 | 0.308 | 1.17E-162 | B cells | SMIM37  |
| 6332 | FOS.2     | 1.31E-166 | -1.57584 | 0.043 | 0.134 | 2.47E-162 | B cells | FOS     |
| 6333 | NDUFA3    | 2.02E-166 | -0.3306  | 0.433 | 0.607 | 3.79E-162 | B cells | NDUFA3  |
| 6334 | ISG15.1   | 4.39E-166 | -0.40134 | 0.192 | 0.33  | 8.24E-162 | B cells | ISG15   |
| 6335 | KIF2A.2   | 6.55E-166 | -0.34984 | 0.202 | 0.348 | 1.23E-161 | B cells | KIF2A   |
| 6336 | SP110     | 9.57E-166 | 0.452781 | 0.425 | 0.325 | 1.80E-161 | B cells | SP110   |
| 6337 | JAK3      | 3.78E-165 | -0.33396 | 0.12  | 0.243 | 7.09E-161 | B cells | JAK3    |
| 6338 | BID.1     | 4.28E-165 | -0.37003 | 0.084 | 0.193 | 8.04E-161 | B cells | BID     |
| 6339 | ZNF107    | 5.62E-165 | 0.336183 | 0.135 | 0.059 | 1.06E-160 | B cells | ZNF107  |
| 6340 | LIMS2.1   | 7.09E-165 | 0.419806 | 0.164 | 0.08  | 1.33E-160 | B cells | LIMS2   |
| 6341 | NDUFS8    | 7.87E-165 | -0.32417 | 0.281 | 0.441 | 1.48E-160 | B cells | NDUFS8  |
| 6342 | TMEM19    | 4.94E-164 | 0.351099 | 0.152 | 0.071 | 9.28E-160 | B cells | TMEM19  |
| 6343 | MYH9      | 6.81E-164 | -0.36577 | 0.342 | 0.506 | 1.28E-159 | B cells | MYH9    |
| 6344 | NFKB2     | 9.38E-164 | 0.370462 | 0.161 | 0.078 | 1.76E-159 | B cells | NFKB2   |
| 6345 | RRAS2     | 1.34E-163 | 0.27286  | 0.102 | 0.037 | 2.51E-159 | B cells | RRAS2   |
| 6346 | THYN1.2   | 2.66E-163 | -0.29645 | 0.167 | 0.306 | 4.99E-159 | B cells | THYN1   |
| 6347 | MPP1.2    | 3.64E-163 | -0.32158 | 0.032 | 0.119 | 6.83E-159 | B cells | MPP1    |
| 6348 | FCGRT.2   | 7.18E-163 | -0.47344 | 0.122 | 0.24  | 1.35E-158 | B cells | FCGRT   |
| 6349 | UBE2F     | 1.10E-162 | -0.30897 | 0.069 | 0.174 | 2.07E-158 | B cells | UBE2F   |
| 6350 | TESC.1    | 1.37E-162 | -0.30646 | 0.03  | 0.114 | 2.58E-158 | B cells | TESC    |
| 6351 | TMEM258   | 6.92E-162 | -0.33832 | 0.521 | 0.676 | 1.30E-157 | B cells | TMEM258 |
| 6352 | BRI3.2    | 1.78E-161 | -0.3467  | 0.053 | 0.15  | 3.35E-157 | B cells | BRI3    |
| 6353 | PSMA5.1   | 3.58E-161 | -0.33893 | 0.294 | 0.449 | 6.72E-157 | B cells | PSMA5   |
| 6354 | PSTPIP1.2 | 1.02E-160 | -0.34222 | 0.113 | 0.232 | 1.91E-156 | B cells | PSTPIP1 |
| 6355 | YWHAB.3   | 1.62E-160 | -0.29486 | 0.733 | 0.835 | 3.05E-156 | B cells | YWHAB   |
| 6356 | PSMA1     | 2.19E-160 | -0.30692 | 0.198 | 0.344 | 4.12E-156 | B cells | PSMA1   |
| 6357 | SEC61B.2  | 2.84E-160 | -0.40197 | 0.469 | 0.618 | 5.34E-156 | B cells | SEC61B  |
| 6358 | MFNG.2    | 6.21E-160 | -0.32097 | 0.221 | 0.369 | 1.17E-155 | B cells | MFNG    |
| 6359 | EIF3G.2   | 6.97E-160 | -0.31546 | 0.669 | 0.798 | 1.31E-155 | B cells | EIF3G   |
| 6360 | VCPKMT.1  | 1.08E-159 | 0.373871 | 0.174 | 0.088 | 2.03E-155 | B cells | VCPKMT  |
| 6361 | NDUFB9    | 1.61E-159 | -0.33731 | 0.473 | 0.633 | 3.02E-155 | B cells | NDUFB9  |
| 6362 | CYLD.2    | 3.64E-159 | -0.34616 | 0.155 | 0.284 | 6.84E-155 | B cells | CYLD    |
| 6363 | C9orf16.2 | 7.39E-159 | -0.33957 | 0.475 | 0.638 | 1.39E-154 | B cells | C9orf16 |
| 6364 | CLEC11A.1 | 9.26E-159 | -0.27446 | 0.026 | 0.107 | 1.74E-154 | B cells | CLEC11A |
| 6365 | PHB2.2    | 1.18E-158 | 0.37751  | 0.618 | 0.554 | 2.22E-154 | B cells | PHB2    |
| 6366 | FAM45A.2  | 4.82E-158 | -0.28339 | 0.051 | 0.147 | 9.05E-154 | B cells | FAM45A  |
| 6367 | ATM.3     | 1.55E-157 | -0.36257 | 0.242 | 0.386 | 2.91E-153 | B cells | ATM     |
| 6368 | MAZ       | 1.90E-157 | -0.306   | 0.083 | 0.191 | 3.57E-153 | B cells | MAZ     |
| 6369 | CMC1      | 1.96E-157 | -0.42274 | 0.075 | 0.179 | 3.69E-153 | B cells | CMC1    |
| 6370 | NQO2.1    | 1.20E-156 | -0.25463 | 0.025 | 0.105 | 2.26E-152 | B cells | NQO2    |

|      |            |           |          |       |       |           |         |            |
|------|------------|-----------|----------|-------|-------|-----------|---------|------------|
| 6371 | NFKBID     | 2.07E-156 | 0.307366 | 0.102 | 0.038 | 3.89E-152 | B cells | NFKBID     |
| 6372 | BASP1.1    | 2.17E-156 | 0.251143 | 0.102 | 0.038 | 4.08E-152 | B cells | BASP1      |
| 6373 | SLC20A1    | 2.76E-155 | -0.29942 | 0.043 | 0.132 | 5.19E-151 | B cells | SLC20A1    |
| 6374 | TMEM50A    | 8.13E-155 | -0.33403 | 0.365 | 0.523 | 1.53E-150 | B cells | TMEM50A    |
| 6375 | ANAPC16.1  | 8.91E-155 | 0.337577 | 0.713 | 0.667 | 1.67E-150 | B cells | ANAPC16    |
| 6376 | HIGD2A.2   | 5.40E-154 | -0.32438 | 0.56  | 0.707 | 1.02E-149 | B cells | HIGD2A     |
| 6377 | EIF4A1.3   | 1.53E-153 | -0.3091  | 0.123 | 0.242 | 2.88E-149 | B cells | EIF4A1     |
| 6378 | HOPX.3     | 5.37E-153 | -0.86306 | 0.047 | 0.133 | 1.01E-148 | B cells | HOPX       |
| 6379 | REXO2.1    | 2.54E-152 | -0.33087 | 0.147 | 0.272 | 4.77E-148 | B cells | REXO2      |
| 6380 | CPPED1.2   | 2.99E-152 | -0.33214 | 0.031 | 0.112 | 5.61E-148 | B cells | CPPED1     |
| 6381 | MSRB1.2    | 8.87E-152 | -0.38739 | 0.047 | 0.137 | 1.67E-147 | B cells | MSRB1      |
| 6382 | DEF8.1     | 2.25E-151 | 0.401501 | 0.167 | 0.086 | 4.23E-147 | B cells | DEF8       |
| 6383 | EVI2A      | 3.17E-151 | -0.28637 | 0.055 | 0.149 | 5.95E-147 | B cells | EVI2A      |
| 6384 | PRCP       | 5.15E-151 | 0.421945 | 0.23  | 0.139 | 9.67E-147 | B cells | PRCP       |
| 6385 | SEM1.2     | 6.50E-151 | -0.31872 | 0.302 | 0.454 | 1.22E-146 | B cells | SEM1       |
| 6386 | SELENOH.2  | 7.03E-151 | 0.328356 | 0.747 | 0.707 | 1.32E-146 | B cells | SELENOH    |
| 6387 | UQCR10.1   | 7.62E-151 | -0.29348 | 0.618 | 0.76  | 1.43E-146 | B cells | UQCR10     |
| 6388 | PLIN2      | 8.75E-151 | -0.25731 | 0.054 | 0.148 | 1.64E-146 | B cells | PLIN2      |
| 6389 | GLG1       | 1.31E-150 | -0.29241 | 0.141 | 0.266 | 2.46E-146 | B cells | GLG1       |
| 6390 | H2AFV.2    | 1.60E-150 | -0.33061 | 0.253 | 0.398 | 3.00E-146 | B cells | H2AFV      |
| 6391 | CEBPB.1    | 1.74E-150 | -0.3273  | 0.048 | 0.138 | 3.27E-146 | B cells | CEBPB      |
| 6392 | ARHGEF1.3  | 2.15E-150 | -0.3442  | 0.439 | 0.596 | 4.04E-146 | B cells | ARHGEF1    |
| 6393 | RASGRP2.3  | 3.60E-150 | 0.391754 | 0.579 | 0.506 | 6.76E-146 | B cells | RASGRP2    |
| 6394 | ATP5MPL.1  | 3.63E-150 | -0.34035 | 0.42  | 0.575 | 6.83E-146 | B cells | ATP5MPL    |
| 6395 | ACAP1.2    | 5.65E-150 | -0.34896 | 0.382 | 0.53  | 1.06E-145 | B cells | ACAP1      |
| 6396 | C9orf78.1  | 3.61E-149 | -0.31732 | 0.274 | 0.423 | 6.78E-145 | B cells | C9orf78    |
| 6397 | LST1.3     | 8.80E-149 | -1.51016 | 0.099 | 0.195 | 1.65E-144 | B cells | LST1       |
| 6398 | MAP7D1     | 1.81E-148 | -0.25702 | 0.035 | 0.117 | 3.39E-144 | B cells | MAP7D1     |
| 6399 | MAP3K8.1   | 3.22E-148 | 0.325157 | 0.194 | 0.104 | 6.05E-144 | B cells | MAP3K8     |
| 6400 | AC027097.1 | 4.80E-148 | 0.284287 | 0.113 | 0.047 | 9.02E-144 | B cells | AC027097.1 |
| 6401 | LAGE3.1    | 5.37E-148 | -0.28402 | 0.143 | 0.268 | 1.01E-143 | B cells | LAGE3      |
| 6402 | NCF2.1     | 1.34E-147 | -0.43314 | 0.035 | 0.115 | 2.51E-143 | B cells | NCF2       |
| 6403 | SMCHD1     | 2.21E-147 | 0.426055 | 0.461 | 0.369 | 4.15E-143 | B cells | SMCHD1     |
| 6404 | CENPK.1    | 1.34E-146 | -0.26013 | 0.036 | 0.119 | 2.52E-142 | B cells | CENPK      |
| 6405 | ANP32B.2   | 2.09E-146 | -0.3275  | 0.543 | 0.69  | 3.93E-142 | B cells | ANP32B     |
| 6406 | OPTN.2     | 3.26E-146 | -0.35903 | 0.104 | 0.21  | 6.13E-142 | B cells | OPTN       |
| 6407 | RPL36A.3   | 3.69E-145 | -0.32634 | 0.727 | 0.831 | 6.94E-141 | B cells | RPL36A     |
| 6408 | RIC3       | 1.27E-144 | 0.319795 | 0.145 | 0.069 | 2.38E-140 | B cells | RIC3       |
| 6409 | SH3BGRL.3  | 1.55E-144 | 0.338179 | 0.608 | 0.536 | 2.91E-140 | B cells | SH3BGRL    |
| 6410 | DIP2A.2    | 1.87E-144 | -0.31008 | 0.066 | 0.161 | 3.50E-140 | B cells | DIP2A      |
| 6411 | RAP1A      | 2.64E-144 | -0.29072 | 0.249 | 0.396 | 4.96E-140 | B cells | RAP1A      |
| 6412 | NPM1.2     | 8.04E-144 | -0.28868 | 0.918 | 0.907 | 1.51E-139 | B cells | NPM1       |
| 6413 | NDUFS6.2   | 9.56E-144 | -0.31044 | 0.257 | 0.401 | 1.80E-139 | B cells | NDUFS6     |
| 6414 | COX7A2.1   | 1.45E-143 | -0.28681 | 0.597 | 0.732 | 2.72E-139 | B cells | COX7A2     |
| 6415 | DHRS7.1    | 1.66E-143 | -0.39272 | 0.233 | 0.367 | 3.11E-139 | B cells | DHRS7      |
| 6416 | PIKFYVE    | 1.95E-143 | 0.299569 | 0.142 | 0.067 | 3.66E-139 | B cells | PIKFYVE    |
| 6417 | PHTF2      | 2.15E-143 | 0.343547 | 0.153 | 0.077 | 4.03E-139 | B cells | PHTF2      |

|      |            |           |          |       |       |           |         |            |
|------|------------|-----------|----------|-------|-------|-----------|---------|------------|
| 6418 | HOXB2.2    | 2.85E-143 | -0.27417 | 0.056 | 0.148 | 5.35E-139 | B cells | HOXB2      |
| 6419 | KRAS       | 7.03E-143 | -0.28346 | 0.175 | 0.304 | 1.32E-138 | B cells | KRAS       |
| 6420 | ANAPC15.1  | 7.05E-143 | -0.26734 | 0.108 | 0.219 | 1.32E-138 | B cells | ANAPC15    |
| 6421 | DUSP23.2   | 9.91E-143 | -0.27617 | 0.077 | 0.177 | 1.86E-138 | B cells | DUSP23     |
| 6422 | RNASEH2B   | 1.01E-142 | 0.438094 | 0.387 | 0.293 | 1.90E-138 | B cells | RNASEH2B   |
| 6423 | TNFAIP8L2  | 2.95E-142 | -0.28355 | 0.097 | 0.204 | 5.54E-138 | B cells | TNFAIP8L2  |
| 6424 | PTPRCAP.2  | 9.73E-142 | 0.394982 | 0.551 | 0.454 | 1.83E-137 | B cells | PTPRCAP    |
| 6425 | RWDD1      | 3.34E-141 | -0.29119 | 0.284 | 0.435 | 6.26E-137 | B cells | RWDD1      |
| 6426 | SMDT1.2    | 3.34E-141 | 0.315059 | 0.713 | 0.67  | 6.28E-137 | B cells | SMDT1      |
| 6427 | SCML4.2    | 5.51E-141 | -0.33022 | 0.102 | 0.208 | 1.04E-136 | B cells | SCML4      |
| 6428 | ATP2B1-AS1 | 2.58E-140 | 0.324247 | 0.147 | 0.072 | 4.85E-136 | B cells | ATP2B1-AS1 |
| 6429 | UNC93B1.1  | 4.80E-140 | 0.310141 | 0.115 | 0.05  | 9.02E-136 | B cells | UNC93B1    |
| 6430 | TRIM38.1   | 4.85E-140 | 0.373716 | 0.198 | 0.113 | 9.12E-136 | B cells | TRIM38     |
| 6431 | THEMIS2.1  | 1.30E-139 | -0.33287 | 0.09  | 0.191 | 2.45E-135 | B cells | THEMIS2    |
| 6432 | GRAMD1A    | 1.68E-139 | -0.2617  | 0.068 | 0.163 | 3.16E-135 | B cells | GRAMD1A    |
| 6433 | CIRBP.2    | 6.70E-139 | 0.321512 | 0.784 | 0.759 | 1.26E-134 | B cells | CIRBP      |
| 6434 | SSBP2.2    | 1.22E-138 | 0.383185 | 0.192 | 0.109 | 2.29E-134 | B cells | SSBP2      |
| 6435 | DIAPH1.2   | 2.25E-138 | -0.2784  | 0.077 | 0.174 | 4.23E-134 | B cells | DIAPH1     |
| 6436 | GYG1.2     | 2.86E-138 | -0.3182  | 0.091 | 0.192 | 5.37E-134 | B cells | GYG1       |
| 6437 | SF1.2      | 5.43E-138 | 0.361026 | 0.634 | 0.576 | 1.02E-133 | B cells | SF1        |
| 6438 | ERGIC1.2   | 1.06E-137 | 0.362325 | 0.171 | 0.093 | 1.99E-133 | B cells | ERGIC1     |
| 6439 | AGTPBP1.2  | 3.27E-137 | -0.29005 | 0.051 | 0.136 | 6.13E-133 | B cells | AGTPBP1    |
| 6440 | ATP5MF.2   | 3.86E-137 | -0.29923 | 0.528 | 0.673 | 7.25E-133 | B cells | ATP5MF     |
| 6441 | IL10RA.3   | 8.03E-137 | -0.34757 | 0.169 | 0.289 | 1.51E-132 | B cells | IL10RA     |
| 6442 | C7orf50.1  | 2.31E-136 | 0.489683 | 0.281 | 0.193 | 4.33E-132 | B cells | C7orf50    |
| 6443 | REX1BD     | 2.55E-136 | -0.28934 | 0.351 | 0.508 | 4.79E-132 | B cells | REX1BD     |
| 6444 | JPT1.2     | 2.85E-136 | -0.33162 | 0.212 | 0.342 | 5.36E-132 | B cells | JPT1       |
| 6445 | SH3YL1.2   | 7.88E-136 | -0.33721 | 0.118 | 0.224 | 1.48E-131 | B cells | SH3YL1     |
| 6446 | SDCBP.2    | 9.30E-136 | -0.35444 | 0.247 | 0.382 | 1.75E-131 | B cells | SDCBP      |
| 6447 | DCK.2      | 1.42E-134 | 0.41528  | 0.384 | 0.293 | 2.67E-130 | B cells | DCK        |
| 6448 | DNAJC1.2   | 4.06E-134 | -0.25807 | 0.071 | 0.167 | 7.63E-130 | B cells | DNAJC1     |
| 6449 | ITSN2.1    | 5.69E-134 | 0.416761 | 0.336 | 0.244 | 1.07E-129 | B cells | ITSN2      |
| 6450 | VDAC3.1    | 1.07E-133 | -0.28082 | 0.21  | 0.343 | 2.01E-129 | B cells | VDAC3      |
| 6451 | SLC3A2     | 8.59E-133 | -0.26301 | 0.176 | 0.304 | 1.61E-128 | B cells | SLC3A2     |
| 6452 | GSTO1.3    | 1.08E-132 | -0.33402 | 0.197 | 0.323 | 2.03E-128 | B cells | GSTO1      |
| 6453 | LPIN2.1    | 1.14E-132 | -0.25762 | 0.062 | 0.152 | 2.14E-128 | B cells | LPIN2      |
| 6454 | CASP1.1    | 4.25E-132 | -0.38169 | 0.155 | 0.267 | 7.99E-128 | B cells | CASP1      |
| 6455 | CDC42EP3   | 8.22E-132 | -0.37188 | 0.105 | 0.206 | 1.54E-127 | B cells | CDC42EP3   |
| 6456 | ARHGEF3.1  | 1.37E-131 | -0.2828  | 0.084 | 0.18  | 2.57E-127 | B cells | ARHGEF3    |
| 6457 | FAM102A.1  | 5.82E-131 | -0.30007 | 0.069 | 0.159 | 1.09E-126 | B cells | FAM102A    |
| 6458 | SLC16A3.1  | 9.59E-131 | -0.27736 | 0.052 | 0.135 | 1.80E-126 | B cells | SLC16A3    |
| 6459 | ST6GAL1.2  | 2.12E-130 | 0.400367 | 0.23  | 0.143 | 3.98E-126 | B cells | ST6GAL1    |
| 6460 | SPCS3.2    | 7.72E-130 | -0.31574 | 0.137 | 0.248 | 1.45E-125 | B cells | SPCS3      |
| 6461 | CYB5A.2    | 8.76E-129 | 0.4066   | 0.25  | 0.164 | 1.65E-124 | B cells | CYB5A      |
| 6462 | WIPF1.1    | 3.74E-128 | -0.29632 | 0.204 | 0.331 | 7.02E-124 | B cells | WIPF1      |
| 6463 | H2AFZ.2    | 5.63E-128 | -0.35643 | 0.419 | 0.561 | 1.06E-123 | B cells | H2AFZ      |
| 6464 | NAP1L4.1   | 5.92E-128 | -0.28196 | 0.18  | 0.303 | 1.11E-123 | B cells | NAP1L4     |



|      |            |           |          |       |       |           |         |            |
|------|------------|-----------|----------|-------|-------|-----------|---------|------------|
| 6465 | OSTC.2     | 6.11E-128 | -0.29953 | 0.329 | 0.471 | 1.15E-123 | B cells | OSTC       |
| 6466 | ITM2C.2    | 6.95E-128 | 0.292058 | 0.217 | 0.128 | 1.31E-123 | B cells | ITM2C      |
| 6467 | PLSCR3.1   | 8.07E-128 | -0.27571 | 0.097 | 0.195 | 1.52E-123 | B cells | PLSCR3     |
| 6468 | VMP1.1     | 2.03E-127 | -0.30074 | 0.117 | 0.223 | 3.82E-123 | B cells | VMP1       |
| 6469 | SMPD1.2    | 2.27E-127 | -0.25907 | 0.069 | 0.159 | 4.26E-123 | B cells | SMPD1      |
| 6470 | TAGAP.3    | 5.15E-127 | 0.409786 | 0.476 | 0.384 | 9.68E-123 | B cells | TAGAP      |
| 6471 | CARS       | 1.78E-126 | -0.25764 | 0.087 | 0.183 | 3.34E-122 | B cells | CARS       |
| 6472 | TWF2.1     | 1.79E-126 | -0.28868 | 0.328 | 0.472 | 3.35E-122 | B cells | TWF2       |
| 6473 | CCSER2.3   | 2.34E-126 | -0.26097 | 0.061 | 0.147 | 4.40E-122 | B cells | CCSER2     |
| 6474 | SCPEP1.1   | 2.37E-126 | 0.404181 | 0.203 | 0.122 | 4.44E-122 | B cells | SCPEP1     |
| 6475 | HM13.2     | 2.29E-125 | -0.30319 | 0.222 | 0.348 | 4.30E-121 | B cells | HM13       |
| 6476 | METTL21A   | 4.66E-125 | 0.347036 | 0.192 | 0.113 | 8.76E-121 | B cells | METTL21A   |
| 6477 | METTL9.2   | 1.65E-124 | -0.29683 | 0.225 | 0.355 | 3.10E-120 | B cells | METTL9     |
| 6478 | ITGAM.1    | 1.87E-124 | -0.32583 | 0.031 | 0.101 | 3.52E-120 | B cells | ITGAM      |
| 6479 | ATOX1.3    | 1.98E-124 | -0.30392 | 0.154 | 0.266 | 3.72E-120 | B cells | ATOX1      |
| 6480 | SH3TC1.1   | 2.05E-124 | 0.280233 | 0.106 | 0.046 | 3.84E-120 | B cells | SH3TC1     |
| 6481 | CEPT1      | 2.39E-124 | 0.34676  | 0.174 | 0.098 | 4.50E-120 | B cells | CEPT1      |
| 6482 | ARID5B.2   | 2.96E-124 | 0.385738 | 0.298 | 0.203 | 5.55E-120 | B cells | ARID5B     |
| 6483 | HMGN2.1    | 3.14E-124 | 0.267539 | 0.787 | 0.74  | 5.89E-120 | B cells | HMGN2      |
| 6484 | ZNF581.1   | 3.39E-124 | 0.386099 | 0.246 | 0.161 | 6.36E-120 | B cells | ZNF581     |
| 6485 | RNF41      | 3.52E-124 | 0.314375 | 0.154 | 0.082 | 6.61E-120 | B cells | RNF41      |
| 6486 | CD48.2     | 4.54E-123 | -0.2998  | 0.312 | 0.451 | 8.54E-119 | B cells | CD48       |
| 6487 | LINC01215  | 1.70E-120 | 0.274154 | 0.115 | 0.053 | 3.18E-116 | B cells | LINC01215  |
| 6488 | UFD1.1     | 1.86E-120 | -0.25249 | 0.179 | 0.299 | 3.49E-116 | B cells | UFD1       |
| 6489 | TSC22D4    | 2.14E-120 | -0.28392 | 0.239 | 0.368 | 4.03E-116 | B cells | TSC22D4    |
| 6490 | PNPLA8     | 3.11E-120 | 0.358069 | 0.2   | 0.121 | 5.84E-116 | B cells | PNPLA8     |
| 6491 | HIST1H2BK  | 4.06E-120 | 0.342316 | 0.159 | 0.087 | 7.63E-116 | B cells | HIST1H2BK  |
| 6492 | SOD1.2     | 7.13E-120 | -0.27775 | 0.599 | 0.731 | 1.34E-115 | B cells | SOD1       |
| 6493 | TPM3.2     | 1.79E-119 | -0.32378 | 0.651 | 0.755 | 3.36E-115 | B cells | TPM3       |
| 6494 | MRPL41.1   | 9.40E-119 | -0.26413 | 0.264 | 0.397 | 1.77E-114 | B cells | MRPL41     |
| 6495 | FAM200B    | 1.86E-118 | -0.25938 | 0.124 | 0.229 | 3.49E-114 | B cells | FAM200B    |
| 6496 | AC119396   | 1.87E-118 | 0.39727  | 0.324 | 0.236 | 3.51E-114 | B cells | AC119396.1 |
| 6497 | RGS14      | 5.66E-118 | -0.27671 | 0.194 | 0.313 | 1.06E-113 | B cells | RGS14      |
| 6498 | PIIB.1     | 1.33E-117 | -0.42398 | 0.72  | 0.815 | 2.49E-113 | B cells | PIIB       |
| 6499 | LTA4H.2    | 1.88E-117 | 0.325464 | 0.415 | 0.325 | 3.52E-113 | B cells | LTA4H      |
| 6500 | APOBEC3C   | 2.71E-117 | 0.345079 | 0.183 | 0.108 | 5.08E-113 | B cells | APOBEC3C   |
| 6501 | COX7A2L    | 5.40E-117 | -0.25714 | 0.42  | 0.57  | 1.01E-112 | B cells | COX7A2L    |
| 6502 | SSR4.1     | 6.05E-117 | -0.33591 | 0.595 | 0.715 | 1.14E-112 | B cells | SSR4       |
| 6503 | DCTN3      | 7.90E-117 | -0.25946 | 0.266 | 0.401 | 1.48E-112 | B cells | DCTN3      |
| 6504 | SLC2A3.3   | 1.39E-116 | -0.38539 | 0.146 | 0.25  | 2.60E-112 | B cells | SLC2A3     |
| 6505 | NDUFA6.2   | 1.78E-116 | -0.28431 | 0.296 | 0.43  | 3.34E-112 | B cells | NDUFA6     |
| 6506 | SMPD2      | 6.27E-116 | 0.289395 | 0.119 | 0.057 | 1.18E-111 | B cells | SMPD2      |
| 6507 | P4HB.1     | 1.61E-115 | -0.33311 | 0.292 | 0.418 | 3.02E-111 | B cells | P4HB       |
| 6508 | TTC39C.1   | 2.87E-115 | -0.25504 | 0.064 | 0.146 | 5.40E-111 | B cells | TTC39C     |
| 6509 | ARID5A.1   | 3.52E-115 | -0.26855 | 0.115 | 0.213 | 6.62E-111 | B cells | ARID5A     |
| 6510 | GABPB1-AS1 | 9.14E-115 | 0.387972 | 0.238 | 0.157 | 1.72E-110 | B cells | GABPB1-AS1 |
| 6511 | B4GALT1    | 1.53E-114 | 0.326516 | 0.172 | 0.098 | 2.87E-110 | B cells | B4GALT1    |

|      |           |           |          |       |       |           |         |          |
|------|-----------|-----------|----------|-------|-------|-----------|---------|----------|
| 6512 | PGAM1.2   | 1.63E-114 | -0.33503 | 0.403 | 0.53  | 3.06E-110 | B cells | PGAM1    |
| 6513 | HACD4.2   | 2.25E-114 | -0.26207 | 0.152 | 0.261 | 4.23E-110 | B cells | HACD4    |
| 6514 | CDC42.2   | 1.14E-113 | -0.27805 | 0.556 | 0.692 | 2.13E-109 | B cells | CDC42    |
| 6515 | MCUB.3    | 1.60E-113 | -0.31131 | 0.417 | 0.55  | 3.00E-109 | B cells | MCUB     |
| 6516 | ITGB1.1   | 5.48E-113 | -0.35526 | 0.128 | 0.227 | 1.03E-108 | B cells | ITGB1    |
| 6517 | APH1A.1   | 6.35E-113 | 0.361515 | 0.474 | 0.41  | 1.19E-108 | B cells | APH1A    |
| 6518 | ARL4A     | 1.25E-112 | 0.31553  | 0.139 | 0.074 | 2.35E-108 | B cells | ARL4A    |
| 6519 | PTP4A2.1  | 4.36E-112 | -0.27629 | 0.222 | 0.343 | 8.19E-108 | B cells | PTP4A2   |
| 6520 | PPP3CC.1  | 7.10E-112 | 0.371318 | 0.3   | 0.215 | 1.33E-107 | B cells | PPP3CC   |
| 6521 | NUP88     | 1.20E-111 | 0.290809 | 0.129 | 0.066 | 2.25E-107 | B cells | NUP88    |
| 6522 | STMN3.2   | 1.68E-111 | -0.27306 | 0.119 | 0.217 | 3.15E-107 | B cells | STMN3    |
| 6523 | RAC1.1    | 1.77E-111 | -0.41098 | 0.41  | 0.527 | 3.33E-107 | B cells | RAC1     |
| 6524 | DEGS1.2   | 4.44E-111 | 0.411838 | 0.279 | 0.199 | 8.33E-107 | B cells | DEGS1    |
| 6525 | NDUFB4.1  | 9.90E-111 | -0.26025 | 0.457 | 0.604 | 1.86E-106 | B cells | NDUFB4   |
| 6526 | SYNE1.1   | 1.13E-110 | -0.30018 | 0.101 | 0.192 | 2.12E-106 | B cells | SYNE1    |
| 6527 | SUSD3.3   | 1.32E-109 | -0.28062 | 0.154 | 0.258 | 2.48E-105 | B cells | SUSD3    |
| 6528 | ATP6AP2   | 1.35E-109 | -0.25107 | 0.289 | 0.425 | 2.54E-105 | B cells | ATP6AP2  |
| 6529 | EIF1AY    | 2.37E-109 | 0.389798 | 0.177 | 0.106 | 4.45E-105 | B cells | EIF1AY   |
| 6530 | TSC22D3.1 | 2.95E-109 | 0.573614 | 0.636 | 0.61  | 5.54E-105 | B cells | TSC22D3  |
| 6531 | APRT.2    | 9.70E-109 | -0.25956 | 0.653 | 0.781 | 1.82E-104 | B cells | APRT     |
| 6532 | ARMH1.3   | 1.06E-108 | -0.28728 | 0.121 | 0.217 | 1.99E-104 | B cells | ARMH1    |
| 6533 | CAP1.3    | 1.21E-107 | -0.30026 | 0.486 | 0.615 | 2.27E-103 | B cells | CAP1     |
| 6534 | RABEP1    | 4.78E-107 | 0.359406 | 0.195 | 0.122 | 8.97E-103 | B cells | RABEP1   |
| 6535 | PNISR.2   | 6.08E-107 | 0.338227 | 0.591 | 0.543 | 1.14E-102 | B cells | PNISR    |
| 6536 | NDUFA11.1 | 1.76E-106 | -0.25827 | 0.357 | 0.496 | 3.31E-102 | B cells | NDUFA11  |
| 6537 | SNX5      | 2.36E-106 | 0.362341 | 0.273 | 0.192 | 4.43E-102 | B cells | SNX5     |
| 6538 | SOD2.2    | 2.40E-106 | -0.3993  | 0.121 | 0.217 | 4.50E-102 | B cells | SOD2     |
| 6539 | TYMP.2    | 1.26E-105 | -0.99187 | 0.151 | 0.233 | 2.36E-101 | B cells | TYMP     |
| 6540 | PCK2.1    | 1.60E-105 | 0.28701  | 0.129 | 0.067 | 3.01E-101 | B cells | PCK2     |
| 6541 | CAT.2     | 8.53E-105 | 0.374389 | 0.321 | 0.243 | 1.60E-100 | B cells | CAT      |
| 6542 | PPP1CC.1  | 9.66E-105 | 0.350062 | 0.49  | 0.429 | 1.82E-100 | B cells | PPP1CC   |
| 6543 | MT-ND3.2  | 1.08E-104 | 0.276478 | 0.973 | 0.971 | 2.02E-100 | B cells | MT-ND3   |
| 6544 | ROMO1.3   | 2.17E-104 | -0.26289 | 0.337 | 0.469 | 4.08E-100 | B cells | ROMO1    |
| 6545 | OCIAD2.1  | 4.58E-104 | -0.31729 | 0.341 | 0.459 | 8.61E-100 | B cells | OCIAD2   |
| 6546 | RGS2.1    | 6.17E-104 | -0.43195 | 0.036 | 0.1   | 1.16E-99  | B cells | RGS2     |
| 6547 | VAMP8.3   | 1.01E-103 | -0.30733 | 0.488 | 0.615 | 1.89E-99  | B cells | VAMP8    |
| 6548 | ARL6IP5.1 | 1.16E-103 | -0.27525 | 0.543 | 0.68  | 2.17E-99  | B cells | ARL6IP5  |
| 6549 | SNAP23.1  | 2.44E-103 | 0.357433 | 0.33  | 0.25  | 4.59E-99  | B cells | SNAP23   |
| 6550 | PA2G4.1   | 9.58E-103 | -0.25278 | 0.354 | 0.49  | 1.80E-98  | B cells | PA2G4    |
| 6551 | TCIRG1.1  | 1.75E-102 | -0.33402 | 0.178 | 0.28  | 3.28E-98  | B cells | TCIRG1   |
| 6552 | HMGB2.3   | 2.74E-102 | -0.33376 | 0.191 | 0.298 | 5.15E-98  | B cells | HMGB2    |
| 6553 | ATG4C.1   | 3.68E-102 | 0.285957 | 0.122 | 0.063 | 6.92E-98  | B cells | ATG4C    |
| 6554 | AIDA.1    | 5.08E-102 | 0.306857 | 0.148 | 0.083 | 9.55E-98  | B cells | AIDA     |
| 6555 | TCEA1.1   | 2.47E-101 | 0.333464 | 0.524 | 0.481 | 4.63E-97  | B cells | TCEA1    |
| 6556 | PYCARD.2  | 2.55E-101 | -0.56729 | 0.293 | 0.392 | 4.80E-97  | B cells | PYCARD   |
| 6557 | GNAI2.1   | 3.85E-101 | -0.32418 | 0.196 | 0.301 | 7.23E-97  | B cells | GNAI2    |
| 6558 | ARHGAP3C  | 4.38E-101 | -0.25866 | 0.227 | 0.343 | 8.23E-97  | B cells | ARHGAP30 |

|      |           |           |          |       |       |          |         |         |
|------|-----------|-----------|----------|-------|-------|----------|---------|---------|
| 6559 | DAD1.1    | 4.77E-101 | -0.2662  | 0.484 | 0.619 | 8.96E-97 | B cells | DAD1    |
| 6560 | MAP4K1.1  | 1.14E-100 | 0.325296 | 0.245 | 0.166 | 2.15E-96 | B cells | MAP4K1  |
| 6561 | ARPC2.3   | 1.80E-100 | -0.30269 | 0.811 | 0.877 | 3.39E-96 | B cells | ARPC2   |
| 6562 | PPP3CA    | 2.13E-100 | 0.272866 | 0.132 | 0.07  | 4.00E-96 | B cells | PPP3CA  |
| 6563 | BSG.1     | 6.93E-100 | -0.27691 | 0.339 | 0.471 | 1.30E-95 | B cells | BSG     |
| 6564 | PIK3R1.1  | 7.61E-100 | -0.25212 | 0.127 | 0.221 | 1.43E-95 | B cells | PIK3R1  |
| 6565 | PLP2.1    | 9.90E-100 | 0.308507 | 0.436 | 0.35  | 1.86E-95 | B cells | PLP2    |
| 6566 | EPB41.2   | 3.45E-99  | -0.26713 | 0.208 | 0.318 | 6.48E-95 | B cells | EPB41   |
| 6567 | FLOT2     | 5.59E-99  | 0.348335 | 0.368 | 0.292 | 1.05E-94 | B cells | FLOT2   |
| 6568 | PRMT1.1   | 3.12E-98  | 0.338895 | 0.456 | 0.388 | 5.86E-94 | B cells | PRMT1   |
| 6569 | NUP214.2  | 7.60E-98  | -0.28895 | 0.086 | 0.167 | 1.43E-93 | B cells | NUP214  |
| 6570 | ANXA6.2   | 1.85E-97  | 0.296895 | 0.622 | 0.567 | 3.48E-93 | B cells | ANXA6   |
| 6571 | APBB1IP.1 | 2.00E-97  | -0.25163 | 0.356 | 0.49  | 3.75E-93 | B cells | APBB1IP |
| 6572 | ABLIM1.3  | 3.04E-97  | -0.30298 | 0.199 | 0.301 | 5.70E-93 | B cells | ABLIM1  |
| 6573 | MEF2A     | 5.49E-97  | 0.32472  | 0.188 | 0.118 | 1.03E-92 | B cells | MEF2A   |
| 6574 | RUNX3     | 1.27E-96  | -0.2533  | 0.063 | 0.135 | 2.39E-92 | B cells | RUNX3   |
| 6575 | ATP5MC3.  | 4.25E-96  | -0.25026 | 0.59  | 0.709 | 7.98E-92 | B cells | ATP5MC3 |
| 6576 | VPS37B    | 4.27E-96  | 0.311272 | 0.194 | 0.123 | 8.02E-92 | B cells | VPS37B  |
| 6577 | BTN3A2.2  | 5.08E-95  | -0.25483 | 0.178 | 0.281 | 9.55E-91 | B cells | BTN3A2  |
| 6578 | OFD1.1    | 8.87E-95  | 0.325147 | 0.252 | 0.175 | 1.67E-90 | B cells | OFD1    |
| 6579 | RHOH.3    | 9.50E-95  | 0.319787 | 0.512 | 0.441 | 1.79E-90 | B cells | RHOH    |
| 6580 | NT5C3A    | 1.55E-94  | 0.322756 | 0.267 | 0.192 | 2.91E-90 | B cells | NT5C3A  |
| 6581 | RHOF.1    | 3.59E-94  | -0.25418 | 0.232 | 0.342 | 6.75E-90 | B cells | RHOF    |
| 6582 | DRAP1.1   | 6.99E-94  | -0.27079 | 0.445 | 0.573 | 1.31E-89 | B cells | DRAP1   |
| 6583 | LAPTM4A.  | 1.68E-93  | 0.325425 | 0.426 | 0.358 | 3.16E-89 | B cells | LAPTM4A |
| 6584 | COX5A.3   | 2.21E-93  | -0.25428 | 0.469 | 0.593 | 4.14E-89 | B cells | COX5A   |
| 6585 | KLF6.3    | 2.50E-93  | -0.38253 | 0.244 | 0.345 | 4.70E-89 | B cells | KLF6    |
| 6586 | CSNK1G3   | 1.36E-92  | 0.271564 | 0.116 | 0.061 | 2.56E-88 | B cells | CSNK1G3 |
| 6587 | DBNL.2    | 7.89E-92  | 0.355826 | 0.428 | 0.366 | 1.48E-87 | B cells | DBNL    |
| 6588 | EIF1B.2   | 1.34E-91  | 0.346993 | 0.418 | 0.356 | 2.51E-87 | B cells | EIF1B   |
| 6589 | CARD16.2  | 1.83E-91  | -0.38991 | 0.315 | 0.418 | 3.43E-87 | B cells | CARD16  |
| 6590 | LAMTOR4.  | 8.96E-91  | -0.28038 | 0.514 | 0.636 | 1.68E-86 | B cells | LAMTOR4 |
| 6591 | RNH1.1    | 9.48E-91  | -0.27512 | 0.292 | 0.407 | 1.78E-86 | B cells | RNH1    |
| 6592 | MYDGF.1   | 1.25E-90  | -0.30588 | 0.219 | 0.325 | 2.36E-86 | B cells | MYDGF   |
| 6593 | PIM2.2    | 2.16E-90  | -0.30777 | 0.232 | 0.333 | 4.05E-86 | B cells | PIM2    |
| 6594 | CHST12.3  | 4.44E-90  | -0.32054 | 0.097 | 0.174 | 8.33E-86 | B cells | CHST12  |
| 6595 | MX1       | 5.71E-90  | 0.351222 | 0.246 | 0.172 | 1.07E-85 | B cells | MX1     |
| 6596 | ISCU.1    | 2.33E-89  | 0.321777 | 0.548 | 0.511 | 4.37E-85 | B cells | ISCU    |
| 6597 | CHI3L2.2  | 1.39E-88  | 0.361553 | 0.208 | 0.137 | 2.61E-84 | B cells | CHI3L2  |
| 6598 | AP1B1     | 3.34E-88  | 0.288791 | 0.138 | 0.08  | 6.27E-84 | B cells | AP1B1   |
| 6599 | LBH.3     | 4.80E-88  | 0.309432 | 0.542 | 0.47  | 9.01E-84 | B cells | LBH     |
| 6600 | RGS19.2   | 5.38E-88  | 0.31062  | 0.461 | 0.389 | 1.01E-83 | B cells | RGS19   |
| 6601 | ARPC1B.1  | 7.00E-88  | -0.28486 | 0.391 | 0.507 | 1.32E-83 | B cells | ARPC1B  |
| 6602 | NDUFB7.2  | 2.78E-87  | -0.25862 | 0.367 | 0.489 | 5.23E-83 | B cells | NDUFB7  |
| 6603 | PRDM2.1   | 1.24E-86  | 0.287762 | 0.165 | 0.101 | 2.33E-82 | B cells | PRDM2   |
| 6604 | TRIM13    | 1.37E-86  | 0.267014 | 0.137 | 0.078 | 2.58E-82 | B cells | TRIM13  |
| 6605 | UTP6      | 2.10E-86  | 0.325416 | 0.197 | 0.131 | 3.94E-82 | B cells | UTP6    |

|      |           |          |          |       |       |          |         |            |
|------|-----------|----------|----------|-------|-------|----------|---------|------------|
| 6606 | ITGB7.3   | 1.42E-85 | -0.2828  | 0.181 | 0.274 | 2.67E-81 | B cells | ITGB7      |
| 6607 | PRELID1.2 | 3.07E-85 | -0.37504 | 0.438 | 0.537 | 5.76E-81 | B cells | PRELID1    |
| 6608 | PHF21A.1  | 6.67E-85 | 0.282178 | 0.121 | 0.067 | 1.25E-80 | B cells | PHF21A     |
| 6609 | AL138963. | 2.28E-83 | -0.39613 | 0.15  | 0.239 | 4.28E-79 | B cells | AL138963.3 |
| 6610 | WDR11     | 4.39E-83 | 0.267023 | 0.121 | 0.067 | 8.25E-79 | B cells | WDR11      |
| 6611 | REEP5.3   | 2.88E-82 | 0.297723 | 0.38  | 0.309 | 5.41E-78 | B cells | REEP5      |
| 6612 | TBC1D5    | 2.23E-81 | 0.276332 | 0.159 | 0.098 | 4.18E-77 | B cells | TBC1D5     |
| 6613 | IFI16.1   | 4.43E-81 | 0.354871 | 0.358 | 0.29  | 8.31E-77 | B cells | IFI16      |
| 6614 | SSBP4.2   | 4.53E-81 | 0.289585 | 0.213 | 0.145 | 8.52E-77 | B cells | SSBP4      |
| 6615 | FKBP1A.2  | 6.12E-81 | -0.2772  | 0.502 | 0.612 | 1.15E-76 | B cells | FKBP1A     |
| 6616 | DUSP22    | 1.20E-80 | 0.305715 | 0.157 | 0.098 | 2.25E-76 | B cells | DUSP22     |
| 6617 | IQCB1     | 2.10E-80 | 0.263446 | 0.122 | 0.069 | 3.94E-76 | B cells | IQCB1      |
| 6618 | HSPA5.2   | 6.46E-80 | -0.36924 | 0.314 | 0.418 | 1.21E-75 | B cells | HSPA5      |
| 6619 | ALDH16A1  | 2.11E-79 | 0.309306 | 0.189 | 0.127 | 3.96E-75 | B cells | ALDH16A1   |
| 6620 | TRPT1.1   | 4.14E-79 | 0.336047 | 0.259 | 0.192 | 7.78E-75 | B cells | TRPT1      |
| 6621 | TRIM22.1  | 8.37E-79 | 0.32409  | 0.44  | 0.377 | 1.57E-74 | B cells | TRIM22     |
| 6622 | FDFT1.3   | 3.65E-77 | 0.328185 | 0.419 | 0.364 | 6.86E-73 | B cells | FDFT1      |
| 6623 | NAMPT.2   | 3.94E-77 | -0.55091 | 0.084 | 0.153 | 7.41E-73 | B cells | NAMPT      |
| 6624 | LYSMD2.1  | 1.19E-76 | 0.330891 | 0.303 | 0.238 | 2.24E-72 | B cells | LYSMD2     |
| 6625 | DNAJC4.1  | 1.83E-76 | 0.333485 | 0.357 | 0.294 | 3.43E-72 | B cells | DNAJC4     |
| 6626 | SECISBP2L | 3.36E-76 | 0.312141 | 0.192 | 0.13  | 6.30E-72 | B cells | SECISBP2L  |
| 6627 | IQSEC1    | 2.21E-75 | 0.25585  | 0.14  | 0.085 | 4.15E-71 | B cells | IQSEC1     |
| 6628 | SIT1.3    | 3.58E-75 | 0.318263 | 0.307 | 0.235 | 6.72E-71 | B cells | SIT1       |
| 6629 | SNX9.1    | 4.71E-75 | 0.298559 | 0.151 | 0.095 | 8.84E-71 | B cells | SNX9       |
| 6630 | KMT2E.1   | 7.88E-74 | 0.309824 | 0.483 | 0.436 | 1.48E-69 | B cells | KMT2E      |
| 6631 | HIST1H1C. | 3.49E-73 | 0.335615 | 0.213 | 0.151 | 6.55E-69 | B cells | HIST1H1C   |
| 6632 | WDSUB1    | 3.32E-72 | 0.260482 | 0.118 | 0.068 | 6.24E-68 | B cells | WDSUB1     |
| 6633 | APEX1.2   | 6.54E-72 | 0.280271 | 0.516 | 0.47  | 1.23E-67 | B cells | APEX1      |
| 6634 | SLC44A2.2 | 2.21E-70 | 0.308871 | 0.38  | 0.319 | 4.15E-66 | B cells | SLC44A2    |
| 6635 | THRAP3.2  | 2.72E-70 | 0.302716 | 0.459 | 0.413 | 5.11E-66 | B cells | THRAP3     |
| 6636 | TNFAIP8.3 | 3.47E-70 | 0.291323 | 0.525 | 0.482 | 6.52E-66 | B cells | TNFAIP8    |
| 6637 | WARS.2    | 3.55E-70 | -0.35291 | 0.085 | 0.15  | 6.68E-66 | B cells | WARS       |
| 6638 | SSR3.2    | 4.70E-69 | -0.25236 | 0.215 | 0.307 | 8.83E-65 | B cells | SSR3       |
| 6639 | OSER1.1   | 3.51E-68 | 0.306067 | 0.226 | 0.167 | 6.60E-64 | B cells | OSER1      |
| 6640 | TALDO1.2  | 1.36E-67 | -0.41277 | 0.415 | 0.507 | 2.55E-63 | B cells | TALDO1     |
| 6641 | CCNB1IP1. | 3.03E-67 | 0.251587 | 0.158 | 0.103 | 5.70E-63 | B cells | CCNB1IP1   |
| 6642 | CLASRP    | 4.61E-67 | 0.288929 | 0.186 | 0.129 | 8.66E-63 | B cells | CLASRP     |
| 6643 | TLN1.2    | 3.82E-66 | -0.25911 | 0.18  | 0.262 | 7.17E-62 | B cells | TLN1       |
| 6644 | OSGEP.1   | 7.76E-66 | 0.315052 | 0.247 | 0.188 | 1.46E-61 | B cells | OSGEP      |
| 6645 | TMEM134.  | 9.73E-66 | 0.299321 | 0.285 | 0.224 | 1.83E-61 | B cells | TMEM134    |
| 6646 | TOR3A.1   | 1.02E-65 | 0.278516 | 0.181 | 0.125 | 1.91E-61 | B cells | TOR3A      |
| 6647 | PWP1.1    | 1.82E-65 | 0.319812 | 0.29  | 0.232 | 3.42E-61 | B cells | PWP1       |
| 6648 | CNPPD1.1  | 1.35E-64 | 0.301772 | 0.314 | 0.255 | 2.53E-60 | B cells | CNPPD1     |
| 6649 | CCS.1     | 1.01E-63 | 0.328059 | 0.329 | 0.273 | 1.89E-59 | B cells | CCS        |
| 6650 | JMJD1C    | 6.85E-63 | 0.314334 | 0.285 | 0.227 | 1.29E-58 | B cells | JMJD1C     |
| 6651 | AC016831. | 3.62E-62 | 0.265642 | 0.175 | 0.119 | 6.79E-58 | B cells | AC016831.7 |
| 6652 | PSAP.2    | 8.20E-62 | -0.77033 | 0.353 | 0.429 | 1.54E-57 | B cells | PSAP       |

|      |            |          |          |       |       |          |         |            |
|------|------------|----------|----------|-------|-------|----------|---------|------------|
| 6653 | SP140L.2   | 9.08E-62 | 0.304444 | 0.238 | 0.181 | 1.71E-57 | B cells | SP140L     |
| 6654 | OAS1.2     | 3.11E-61 | 0.258298 | 0.202 | 0.143 | 5.83E-57 | B cells | OAS1       |
| 6655 | NGLY1      | 3.06E-59 | 0.283908 | 0.231 | 0.174 | 5.74E-55 | B cells | NGLY1      |
| 6656 | PIP4P1.1   | 3.79E-59 | 0.272491 | 0.184 | 0.13  | 7.12E-55 | B cells | PIP4P1     |
| 6657 | MANBA.2    | 1.97E-57 | 0.270056 | 0.16  | 0.11  | 3.71E-53 | B cells | MANBA      |
| 6658 | ANKRD10.1  | 1.02E-56 | 0.298922 | 0.296 | 0.242 | 1.91E-52 | B cells | ANKRD10    |
| 6659 | AP3B1      | 2.89E-55 | 0.311028 | 0.196 | 0.145 | 5.42E-51 | B cells | AP3B1      |
| 6660 | TNIP1.1    | 7.79E-55 | 0.275686 | 0.303 | 0.25  | 1.46E-50 | B cells | TNIP1      |
| 6661 | ARHGAP25   | 3.52E-53 | 0.251135 | 0.24  | 0.184 | 6.62E-49 | B cells | ARHGAP25   |
| 6662 | AFTPH      | 3.41E-52 | 0.253593 | 0.155 | 0.107 | 6.41E-48 | B cells | AFTPH      |
| 6663 | NSD3.2     | 4.39E-52 | 0.293758 | 0.368 | 0.322 | 8.25E-48 | B cells | NSD3       |
| 6664 | IMPDH2.3   | 9.91E-52 | 0.252255 | 0.419 | 0.373 | 1.86E-47 | B cells | IMPDH2     |
| 6665 | ANXA2.2    | 3.49E-51 | -0.58538 | 0.268 | 0.317 | 6.56E-47 | B cells | ANXA2      |
| 6666 | IER2.2     | 4.63E-51 | -0.40386 | 0.431 | 0.52  | 8.70E-47 | B cells | IER2       |
| 6667 | PARVG.2    | 4.66E-51 | 0.263897 | 0.369 | 0.317 | 8.75E-47 | B cells | PARVG      |
| 6668 | KDM4C.1    | 7.51E-51 | 0.251132 | 0.172 | 0.123 | 1.41E-46 | B cells | KDM4C      |
| 6669 | CYBC1.1    | 7.49E-49 | 0.265656 | 0.433 | 0.397 | 1.41E-44 | B cells | CYBC1      |
| 6670 | SMIM29.1   | 1.54E-48 | 0.256357 | 0.218 | 0.167 | 2.90E-44 | B cells | SMIM29     |
| 6671 | HSPA4      | 2.00E-48 | 0.293896 | 0.235 | 0.188 | 3.75E-44 | B cells | HSPA4      |
| 6672 | WDR74.2    | 2.17E-48 | 0.29281  | 0.256 | 0.206 | 4.09E-44 | B cells | WDR74      |
| 6673 | HSD17B4.1  | 1.13E-47 | 0.257622 | 0.154 | 0.109 | 2.13E-43 | B cells | HSD17B4    |
| 6674 | PTPN1      | 9.11E-47 | 0.279135 | 0.235 | 0.188 | 1.71E-42 | B cells | PTPN1      |
| 6675 | SET.2      | 1.80E-46 | 0.256443 | 0.418 | 0.378 | 3.39E-42 | B cells | SET        |
| 6676 | TANK       | 1.96E-46 | 0.265449 | 0.2   | 0.153 | 3.69E-42 | B cells | TANK       |
| 6677 | AHNAK.1    | 2.14E-46 | -0.3636  | 0.211 | 0.274 | 4.02E-42 | B cells | AHNAK      |
| 6678 | NIPA2      | 4.82E-46 | 0.257743 | 0.198 | 0.151 | 9.06E-42 | B cells | NIPA2      |
| 6679 | IFNAR1     | 5.05E-44 | 0.284014 | 0.242 | 0.197 | 9.48E-40 | B cells | IFNAR1     |
| 6680 | PNRC2.1    | 1.15E-43 | 0.253132 | 0.408 | 0.374 | 2.16E-39 | B cells | PNRC2      |
| 6681 | ZNF580     | 5.29E-43 | 0.272859 | 0.196 | 0.152 | 9.93E-39 | B cells | ZNF580     |
| 6682 | PTK2B      | 7.68E-43 | 0.280869 | 0.249 | 0.204 | 1.44E-38 | B cells | PTK2B      |
| 6683 | AC004687.1 | 1.86E-42 | 0.252337 | 0.259 | 0.209 | 3.50E-38 | B cells | AC004687.1 |
| 6684 | STX5       | 8.18E-42 | 0.263177 | 0.199 | 0.156 | 1.54E-37 | B cells | STX5       |
| 6685 | MAF1.2     | 2.12E-38 | 0.25081  | 0.418 | 0.393 | 3.98E-34 | B cells | MAF1       |
| 6686 | GLO1       | 5.72E-38 | 0.267433 | 0.205 | 0.164 | 1.07E-33 | B cells | GLO1       |
| 6687 | CDK5RAP3   | 2.06E-37 | 0.260698 | 0.329 | 0.293 | 3.87E-33 | B cells | CDK5RAP3   |
| 6688 | RPA3.1     | 3.90E-37 | 0.252571 | 0.263 | 0.222 | 7.33E-33 | B cells | RPA3       |
| 6689 | TAF1D.3    | 1.82E-36 | 0.250962 | 0.347 | 0.31  | 3.41E-32 | B cells | TAF1D      |
| 6690 | DARS.1     | 5.11E-36 | 0.251496 | 0.301 | 0.262 | 9.60E-32 | B cells | DARS       |
| 6691 | SMAP2.3    | 6.57E-36 | 0.296519 | 0.273 | 0.235 | 1.23E-31 | B cells | SMAP2      |
| 6692 | HSP90B1.2  | 1.52E-35 | -0.37686 | 0.446 | 0.525 | 2.86E-31 | B cells | HSP90B1    |
| 6693 | ECHDC1     | 1.10E-32 | 0.251854 | 0.261 | 0.225 | 2.06E-28 | B cells | ECHDC1     |
| 6694 | MT-ATP8.1  | 3.19E-24 | 0.257833 | 0.419 | 0.399 | 5.99E-20 | B cells | MT-ATP8    |
| 6695 | ANXA5.2    | 5.73E-23 | -0.33962 | 0.247 | 0.28  | 1.08E-18 | B cells | ANXA5      |
| 6696 | BCL2A1.1   | 5.95E-15 | -0.36719 | 0.145 | 0.173 | 1.12E-10 | B cells | BCL2A1     |
| 6697 | RPS26.2    | 4.64E-14 | 0.284442 | 0.924 | 0.955 | 8.71E-10 | B cells | RPS26      |
| 6698 | GSTP1.3    | 4.66E-09 | -0.31727 | 0.514 | 0.536 | 8.76E-05 | B cells | GSTP1      |
| 6699 | SLC25A37.1 | 2.09E-08 | -0.32311 | 0.096 | 0.115 | 0.000392 | B cells | SLC25A37   |

|      |            |           |          |       |       |           |       |          |
|------|------------|-----------|----------|-------|-------|-----------|-------|----------|
| 6702 | GZMH.3     | 1.69E-187 | 1.629885 | 0.839 | 0.098 | 3.18E-183 | Mixed | GZMH     |
| 6703 | GZMB.3     | 1.41E-181 | 2.01808  | 0.845 | 0.104 | 2.65E-177 | Mixed | GZMB     |
| 6704 | CCL4.3     | 6.48E-165 | 1.216099 | 0.813 | 0.102 | 1.22E-160 | Mixed | CCL4     |
| 6705 | FGFBP2.4   | 4.53E-158 | 1.652996 | 0.768 | 0.098 | 8.50E-154 | Mixed | FGFBP2   |
| 6706 | PRSS23     | 2.96E-156 | 0.962409 | 0.581 | 0.057 | 5.56E-152 | Mixed | PRSS23   |
| 6707 | S1PR5      | 4.90E-155 | 0.988577 | 0.639 | 0.068 | 9.21E-151 | Mixed | S1PR5    |
| 6708 | GZMA.3     | 3.08E-150 | 1.557962 | 0.897 | 0.134 | 5.79E-146 | Mixed | GZMA     |
| 6709 | CST7.2     | 3.45E-149 | 1.752453 | 0.987 | 0.167 | 6.48E-145 | Mixed | CST7     |
| 6710 | GNLY.3     | 6.52E-143 | 2.006217 | 0.735 | 0.099 | 1.22E-138 | Mixed | GNLY     |
| 6711 | PRF1.4     | 5.55E-141 | 1.811252 | 0.942 | 0.172 | 1.04E-136 | Mixed | PRF1     |
| 6712 | CCL5.4     | 5.04E-138 | 1.886187 | 0.884 | 0.146 | 9.47E-134 | Mixed | CCL5     |
| 6713 | ADGRG1     | 5.12E-136 | 0.97197  | 0.555 | 0.059 | 9.61E-132 | Mixed | ADGRG1   |
| 6714 | NKG7.3     | 3.14E-133 | 2.105064 | 0.987 | 0.201 | 5.90E-129 | Mixed | NKG7     |
| 6715 | SPON2.2    | 1.06E-128 | 1.526531 | 0.684 | 0.096 | 1.99E-124 | Mixed | SPON2    |
| 6716 | KLRD1.2    | 1.39E-124 | 1.14191  | 0.697 | 0.096 | 2.60E-120 | Mixed | KLRD1    |
| 6717 | HOPX.4     | 8.59E-117 | 1.250242 | 0.716 | 0.109 | 1.61E-112 | Mixed | HOPX     |
| 6718 | FCRL6      | 4.86E-109 | 0.779493 | 0.477 | 0.054 | 9.12E-105 | Mixed | FCRL6    |
| 6719 | CLIC3.3    | 7.41E-102 | 1.429609 | 0.652 | 0.105 | 1.39E-97  | Mixed | CLIC3    |
| 6720 | CTSW.4     | 4.87E-100 | 1.482495 | 0.981 | 0.251 | 9.16E-96  | Mixed | CTSW     |
| 6721 | FCGR3A.4   | 1.33E-98  | 0.910125 | 0.716 | 0.119 | 2.50E-94  | Mixed | FCGR3A   |
| 6722 | TTC38.1    | 6.60E-95  | 0.98495  | 0.535 | 0.077 | 1.24E-90  | Mixed | TTC38    |
| 6723 | TRDC.1     | 1.13E-93  | 0.706363 | 0.542 | 0.075 | 2.12E-89  | Mixed | TRDC     |
| 6724 | CX3CR1.2   | 4.84E-91  | 0.969448 | 0.6   | 0.096 | 9.09E-87  | Mixed | CX3CR1   |
| 6725 | KLRB1.3    | 1.39E-83  | 1.193333 | 0.645 | 0.118 | 2.61E-79  | Mixed | KLRB1    |
| 6726 | TBX21      | 6.29E-81  | 0.71041  | 0.381 | 0.046 | 1.18E-76  | Mixed | TBX21    |
| 6727 | XCL2       | 4.59E-80  | 0.877434 | 0.381 | 0.047 | 8.63E-76  | Mixed | XCL2     |
| 6728 | FASLG      | 8.15E-78  | 0.438332 | 0.277 | 0.027 | 1.53E-73  | Mixed | FASLG    |
| 6729 | SH2D1B     | 2.77E-76  | 0.651341 | 0.355 | 0.043 | 5.21E-72  | Mixed | SH2D1B   |
| 6730 | IL2RB.1    | 2.07E-74  | 0.770407 | 0.523 | 0.086 | 3.88E-70  | Mixed | IL2RB    |
| 6731 | KLRF1      | 1.08E-72  | 0.677458 | 0.368 | 0.047 | 2.03E-68  | Mixed | KLRF1    |
| 6732 | C1orf21    | 9.39E-71  | 0.48621  | 0.381 | 0.05  | 1.76E-66  | Mixed | C1orf21  |
| 6733 | LAIR2      | 1.57E-70  | 0.903775 | 0.458 | 0.072 | 2.95E-66  | Mixed | LAIR2    |
| 6734 | CCL4L2     | 4.27E-69  | 0.519794 | 0.303 | 0.035 | 8.03E-65  | Mixed | CCL4L2   |
| 6735 | MATK.3     | 4.33E-67  | 0.893677 | 0.581 | 0.115 | 8.13E-63  | Mixed | MATK     |
| 6736 | PTGDR      | 1.54E-65  | 0.52295  | 0.329 | 0.042 | 2.90E-61  | Mixed | PTGDR    |
| 6737 | KLRC1      | 2.02E-63  | 0.789797 | 0.29  | 0.035 | 3.80E-59  | Mixed | KLRC1    |
| 6738 | C12orf75.3 | 3.15E-62  | 0.868165 | 0.781 | 0.2   | 5.92E-58  | Mixed | C12orf75 |
| 6739 | TGFBR3     | 1.01E-58  | 0.438239 | 0.29  | 0.036 | 1.89E-54  | Mixed | TGFBR3   |
| 6740 | LGALS9B    | 9.13E-57  | 0.411187 | 0.181 | 0.016 | 1.71E-52  | Mixed | LGALS9B  |
| 6741 | TRGC1      | 4.90E-56  | 0.437958 | 0.284 | 0.036 | 9.20E-52  | Mixed | TRGC1    |
| 6742 | APMAP.2    | 1.38E-55  | 0.899355 | 0.761 | 0.217 | 2.59E-51  | Mixed | APMAP    |
| 6743 | MS4A1.4    | 2.54E-55  | 0.690555 | 0.987 | 0.27  | 4.78E-51  | Mixed | MS4A1    |
| 6744 | SH2D2A.3   | 7.19E-55  | 0.840198 | 0.6   | 0.138 | 1.35E-50  | Mixed | SH2D2A   |
| 6745 | TRGV9      | 6.63E-54  | 0.995462 | 0.303 | 0.043 | 1.25E-49  | Mixed | TRGV9    |
| 6746 | APOBEC3G   | 1.11E-52  | 1.035499 | 0.742 | 0.218 | 2.09E-48  | Mixed | APOBEC3G |
| 6747 | CD160      | 3.02E-52  | 0.417177 | 0.252 | 0.031 | 5.68E-48  | Mixed | CD160    |
| 6748 | TCL1A.4    | 3.22E-52  | 0.777383 | 0.774 | 0.204 | 6.05E-48  | Mixed | TCL1A    |

|                |          |          |       |       |          |       |           |
|----------------|----------|----------|-------|-------|----------|-------|-----------|
| 6749 RHOC.2    | 1.08E-51 | 0.719823 | 0.503 | 0.107 | 2.04E-47 | Mixed | RHOC      |
| 6750 IGHM.3    | 3.13E-51 | 0.675649 | 0.865 | 0.257 | 5.88E-47 | Mixed | IGHM      |
| 6751 PLEK.2    | 5.69E-51 | 0.856874 | 0.781 | 0.234 | 1.07E-46 | Mixed | PLEK      |
| 6752 ZNF683    | 8.05E-50 | 0.801872 | 0.258 | 0.035 | 1.51E-45 | Mixed | ZNF683    |
| 6753 CD300A.3  | 1.46E-48 | 0.812353 | 0.574 | 0.144 | 2.74E-44 | Mixed | CD300A    |
| 6754 CD79A.3   | 3.12E-48 | 0.733075 | 0.987 | 0.306 | 5.86E-44 | Mixed | CD79A     |
| 6755 ASCL2     | 9.07E-48 | 0.433541 | 0.29  | 0.044 | 1.70E-43 | Mixed | ASCL2     |
| 6756 TSPAN13.2 | 1.80E-47 | 0.455745 | 0.523 | 0.113 | 3.39E-43 | Mixed | TSPAN13   |
| 6757 DUSP2.2   | 7.42E-47 | 1.046107 | 0.542 | 0.136 | 1.39E-42 | Mixed | DUSP2     |
| 6758 NMUR1     | 1.46E-46 | 0.332921 | 0.187 | 0.02  | 2.74E-42 | Mixed | NMUR1     |
| 6759 IGHD.3    | 1.99E-46 | 0.53411  | 0.555 | 0.127 | 3.73E-42 | Mixed | IGHD      |
| 6760 PYHIN1.1  | 4.27E-46 | 0.599896 | 0.426 | 0.086 | 8.02E-42 | Mixed | PYHIN1    |
| 6761 LINC00926 | 6.84E-46 | 0.61561  | 0.71  | 0.19  | 1.29E-41 | Mixed | LINC00926 |
| 6762 HLA-DRB5. | 1.90E-45 | 0.932411 | 0.961 | 0.391 | 3.57E-41 | Mixed | HLA-DRB5  |
| 6763 BANK1.2   | 4.72E-45 | 0.619702 | 0.755 | 0.207 | 8.87E-41 | Mixed | BANK1     |
| 6764 PDLIM1.3  | 5.18E-45 | 0.553132 | 0.69  | 0.182 | 9.74E-41 | Mixed | PDLIM1    |
| 6765 IGHV5-78. | 8.14E-45 | 0.5667   | 0.516 | 0.118 | 1.53E-40 | Mixed | IGHV5-78  |
| 6766 ABI3.3    | 1.20E-44 | 0.734593 | 0.632 | 0.172 | 2.26E-40 | Mixed | ABI3      |
| 6767 MLC1      | 5.33E-44 | 0.307303 | 0.161 | 0.016 | 1.00E-39 | Mixed | MLC1      |
| 6768 HLA-DQA1  | 8.09E-44 | 0.618106 | 0.884 | 0.276 | 1.52E-39 | Mixed | HLA-DQA1  |
| 6769 HLA-DQB1  | 8.68E-44 | 0.591544 | 0.923 | 0.297 | 1.63E-39 | Mixed | HLA-DQB1  |
| 6770 PLA2G16.1 | 8.22E-43 | 0.498431 | 0.348 | 0.065 | 1.54E-38 | Mixed | PLA2G16   |
| 6771 HLA-DQA2  | 2.13E-42 | 0.881123 | 0.71  | 0.213 | 4.00E-38 | Mixed | HLA-DQA2  |
| 6772 EFHD2.3   | 6.18E-42 | 0.757599 | 0.561 | 0.149 | 1.16E-37 | Mixed | EFHD2     |
| 6773 FAM129C.  | 7.22E-42 | 0.665603 | 0.639 | 0.173 | 1.36E-37 | Mixed | FAM129C   |
| 6774 CD19.4    | 3.75E-41 | 0.502931 | 0.703 | 0.194 | 7.04E-37 | Mixed | CD19      |
| 6775 CD79B.4   | 6.56E-41 | 0.637551 | 0.89  | 0.308 | 1.23E-36 | Mixed | CD79B     |
| 6776 PLEKHF1.2 | 1.82E-40 | 0.481356 | 0.419 | 0.09  | 3.43E-36 | Mixed | PLEKHF1   |
| 6777 KIR3DL2   | 3.56E-40 | 0.386544 | 0.174 | 0.02  | 6.68E-36 | Mixed | KIR3DL2   |
| 6778 MYOM2     | 1.64E-39 | 1.02712  | 0.335 | 0.067 | 3.08E-35 | Mixed | MYOM2     |
| 6779 TRDV2     | 6.30E-39 | 1.254642 | 0.181 | 0.022 | 1.18E-34 | Mixed | TRDV2     |
| 6780 B2M.4     | 6.55E-38 | 0.417039 | 1     | 0.999 | 1.23E-33 | Mixed | B2M       |
| 6781 HLA-DPB1. | 9.08E-38 | 0.848732 | 1     | 0.452 | 1.71E-33 | Mixed | HLA-DPB1  |
| 6782 PAX5.1    | 1.29E-37 | 0.38103  | 0.348 | 0.069 | 2.43E-33 | Mixed | PAX5      |
| 6783 PPP2R2B   | 1.96E-37 | 0.302546 | 0.181 | 0.023 | 3.67E-33 | Mixed | PPP2R2B   |
| 6784 KIR2DL3   | 3.05E-37 | 0.461687 | 0.142 | 0.015 | 5.73E-33 | Mixed | KIR2DL3   |
| 6785 NCR1      | 3.87E-37 | 0.283699 | 0.161 | 0.019 | 7.27E-33 | Mixed | NCR1      |
| 6786 VPREB3.4  | 1.14E-36 | 0.424558 | 0.658 | 0.187 | 2.14E-32 | Mixed | VPREB3    |
| 6787 HVCN1.4   | 1.15E-36 | 0.658436 | 0.794 | 0.282 | 2.16E-32 | Mixed | HVCN1     |
| 6788 XCL1      | 1.49E-36 | 0.33723  | 0.226 | 0.034 | 2.80E-32 | Mixed | XCL1      |
| 6789 NCR3.2    | 1.68E-36 | 0.520543 | 0.471 | 0.117 | 3.15E-32 | Mixed | NCR3      |
| 6790 CD99.2    | 3.01E-36 | 0.840285 | 0.981 | 0.54  | 5.66E-32 | Mixed | CD99      |
| 6791 CHST12.4  | 2.06E-35 | 0.560141 | 0.542 | 0.153 | 3.88E-31 | Mixed | CHST12    |
| 6792 HLA-B.2   | 5.21E-35 | 0.611822 | 1     | 0.992 | 9.78E-31 | Mixed | HLA-B     |
| 6793 AKR1C3.1  | 1.81E-34 | 0.460793 | 0.213 | 0.033 | 3.40E-30 | Mixed | AKR1C3    |
| 6794 CD40.4    | 2.05E-34 | 0.429959 | 0.555 | 0.153 | 3.84E-30 | Mixed | CD40      |
| 6795 TPST2.1   | 2.69E-34 | 0.637447 | 0.69  | 0.237 | 5.06E-30 | Mixed | TPST2     |

|      |           |          |          |       |       |          |       |           |
|------|-----------|----------|----------|-------|-------|----------|-------|-----------|
| 6796 | BLK.4     | 5.52E-34 | 0.446809 | 0.516 | 0.136 | 1.04E-29 | Mixed | BLK       |
| 6797 | LINC00299 | 7.47E-34 | 0.290366 | 0.116 | 0.011 | 1.40E-29 | Mixed | LINC00299 |
| 6798 | CD247.4   | 8.05E-34 | 0.832591 | 0.871 | 0.382 | 1.51E-29 | Mixed | CD247     |
| 6799 | PLEKHG3   | 9.67E-34 | 0.269942 | 0.161 | 0.02  | 1.82E-29 | Mixed | PLEKHG3   |
| 6800 | STOM.2    | 1.73E-33 | 0.453788 | 0.439 | 0.111 | 3.26E-29 | Mixed | STOM      |
| 6801 | HLA-DRA.3 | 8.33E-33 | 0.729841 | 1     | 0.401 | 1.57E-28 | Mixed | HLA-DRA   |
| 6802 | CD37.3    | 1.08E-32 | 0.700366 | 1     | 0.891 | 2.03E-28 | Mixed | CD37      |
| 6803 | ADRB2     | 2.44E-32 | 0.373463 | 0.277 | 0.053 | 4.58E-28 | Mixed | ADRB2     |
| 6804 | FCER2.4   | 6.13E-32 | 0.4455   | 0.568 | 0.164 | 1.15E-27 | Mixed | FCER2     |
| 6805 | RAMP1.1   | 7.14E-32 | 0.25856  | 0.123 | 0.013 | 1.34E-27 | Mixed | RAMP1     |
| 6806 | IGFBP7.2  | 1.04E-31 | 0.545549 | 0.277 | 0.056 | 1.95E-27 | Mixed | IGFBP7    |
| 6807 | RALGPS2.3 | 1.11E-31 | 0.573069 | 0.645 | 0.21  | 2.09E-27 | Mixed | RALGPS2   |
| 6808 | SYNE2.4   | 1.48E-31 | 0.573548 | 0.568 | 0.175 | 2.78E-27 | Mixed | SYNE2     |
| 6809 | PAM       | 3.75E-31 | 0.303047 | 0.181 | 0.027 | 7.04E-27 | Mixed | PAM       |
| 6810 | IL18RAP   | 6.32E-31 | 0.273634 | 0.181 | 0.026 | 1.19E-26 | Mixed | IL18RAP   |
| 6811 | HLA-DPA1. | 1.36E-30 | 0.686227 | 0.994 | 0.459 | 2.56E-26 | Mixed | HLA-DPA1  |
| 6812 | TCF4.3    | 2.11E-30 | 0.415719 | 0.458 | 0.124 | 3.96E-26 | Mixed | TCF4      |
| 6813 | AHNAK.2   | 6.51E-30 | 0.569301 | 0.71  | 0.256 | 1.22E-25 | Mixed | AHNAK     |
| 6814 | GZMM.4    | 7.05E-30 | 0.713747 | 0.897 | 0.407 | 1.32E-25 | Mixed | GZMM      |
| 6815 | HLA-DMA.  | 7.05E-30 | 0.522199 | 0.877 | 0.343 | 1.33E-25 | Mixed | HLA-DMA   |
| 6816 | HLA-DOB.3 | 8.79E-30 | 0.3753   | 0.458 | 0.122 | 1.65E-25 | Mixed | HLA-DOB   |
| 6817 | CTSC.3    | 1.84E-29 | 0.64023  | 0.8   | 0.332 | 3.46E-25 | Mixed | CTSC      |
| 6818 | PLPP5.3   | 2.47E-29 | 0.576166 | 0.626 | 0.211 | 4.64E-25 | Mixed | PLPP5     |
| 6819 | HLA-DRB1. | 6.21E-29 | 0.483734 | 1     | 0.431 | 1.17E-24 | Mixed | HLA-DRB1  |
| 6820 | KIR2DL1   | 3.25E-28 | 0.264677 | 0.116 | 0.013 | 6.11E-24 | Mixed | KIR2DL1   |
| 6821 | CXXC5.4   | 4.03E-28 | 0.459237 | 0.477 | 0.14  | 7.58E-24 | Mixed | CXXC5     |
| 6822 | MAP3K8.2  | 4.23E-28 | 0.528883 | 0.439 | 0.126 | 7.94E-24 | Mixed | MAP3K8    |
| 6823 | CD24.3    | 5.34E-28 | 0.295002 | 0.439 | 0.117 | 1.00E-23 | Mixed | CD24      |
| 6824 | LYAR.3    | 8.46E-28 | 0.613218 | 0.51  | 0.162 | 1.59E-23 | Mixed | LYAR      |
| 6825 | CLIC1.3   | 9.19E-28 | 0.752416 | 1     | 0.697 | 1.73E-23 | Mixed | CLIC1     |
| 6826 | SNX22.1   | 1.84E-27 | 0.268404 | 0.271 | 0.057 | 3.45E-23 | Mixed | SNX22     |
| 6827 | USP28     | 1.85E-27 | 0.386022 | 0.297 | 0.068 | 3.47E-23 | Mixed | USP28     |
| 6828 | FCRL1.2   | 3.36E-27 | 0.372917 | 0.426 | 0.115 | 6.32E-23 | Mixed | FCRL1     |
| 6829 | FBXO6.1   | 3.54E-27 | 0.452174 | 0.335 | 0.084 | 6.65E-23 | Mixed | FBXO6     |
| 6830 | ADAM8.1   | 4.71E-27 | 0.509417 | 0.452 | 0.135 | 8.85E-23 | Mixed | ADAM8     |
| 6831 | LITAF.2   | 5.89E-27 | 0.721421 | 0.916 | 0.544 | 1.11E-22 | Mixed | LITAF     |
| 6832 | IRF8.2    | 6.51E-27 | 0.439092 | 0.529 | 0.167 | 1.22E-22 | Mixed | IRF8      |
| 6833 | CD74.4    | 7.05E-27 | 0.774346 | 1     | 0.81  | 1.32E-22 | Mixed | CD74      |
| 6834 | SPIB.1    | 7.65E-27 | 0.334395 | 0.335 | 0.081 | 1.44E-22 | Mixed | SPIB      |
| 6835 | PTGER2.2  | 1.00E-26 | 0.343544 | 0.387 | 0.103 | 1.89E-22 | Mixed | PTGER2    |
| 6836 | LINC02384 | 1.56E-26 | 0.334576 | 0.206 | 0.039 | 2.93E-22 | Mixed | LINC02384 |
| 6837 | ANXA4.1   | 1.74E-26 | 0.468333 | 0.49  | 0.152 | 3.28E-22 | Mixed | ANXA4     |
| 6838 | TPD52.3   | 3.08E-26 | 0.370212 | 0.413 | 0.115 | 5.78E-22 | Mixed | TPD52     |
| 6839 | CD72.4    | 3.73E-26 | 0.450587 | 0.503 | 0.155 | 7.01E-22 | Mixed | CD72      |
| 6840 | GNG2.2    | 3.80E-26 | 0.615813 | 0.677 | 0.264 | 7.14E-22 | Mixed | GNG2      |
| 6841 | ANXA1.4   | 5.04E-26 | 0.633091 | 0.794 | 0.349 | 9.47E-22 | Mixed | ANXA1     |
| 6842 | RUBCNL.2  | 6.62E-26 | 0.35725  | 0.445 | 0.128 | 1.24E-21 | Mixed | RUBCNL    |



|      |            |          |          |       |       |          |       |            |
|------|------------|----------|----------|-------|-------|----------|-------|------------|
| 6843 | STAP1.1    | 6.71E-26 | 0.306544 | 0.284 | 0.064 | 1.26E-21 | Mixed | STAP1      |
| 6844 | LAIR1.1    | 8.46E-26 | 0.601962 | 0.594 | 0.212 | 1.59E-21 | Mixed | LAIR1      |
| 6845 | CALHM2.1   | 1.07E-25 | 0.335206 | 0.329 | 0.083 | 2.01E-21 | Mixed | CALHM2     |
| 6846 | TIGIT      | 1.23E-25 | 0.300112 | 0.245 | 0.051 | 2.32E-21 | Mixed | TIGIT      |
| 6847 | PPP1R14A   | 3.16E-25 | 0.44781  | 0.348 | 0.092 | 5.93E-21 | Mixed | PPP1R14A   |
| 6848 | LAG3.1     | 3.30E-25 | 0.271871 | 0.161 | 0.026 | 6.20E-21 | Mixed | LAG3       |
| 6849 | RPS13.2    | 5.57E-25 | -0.50466 | 1     | 0.993 | 1.05E-20 | Mixed | RPS13      |
| 6850 | LAT2.3     | 7.18E-25 | 0.432972 | 0.613 | 0.214 | 1.35E-20 | Mixed | LAT2       |
| 6851 | STAT4.3    | 2.03E-24 | 0.37129  | 0.413 | 0.119 | 3.81E-20 | Mixed | STAT4      |
| 6852 | HLA-DMB.1  | 2.12E-24 | 0.403766 | 0.581 | 0.197 | 3.98E-20 | Mixed | HLA-DMB    |
| 6853 | CD244      | 3.13E-24 | 0.332695 | 0.271 | 0.063 | 5.87E-20 | Mixed | CD244      |
| 6854 | JAZF1.1    | 3.31E-24 | 0.306175 | 0.348 | 0.091 | 6.21E-20 | Mixed | JAZF1      |
| 6855 | SYNGR1.1   | 5.10E-24 | 0.300889 | 0.239 | 0.051 | 9.59E-20 | Mixed | SYNGR1     |
| 6856 | SLC9A3R1   | 9.76E-24 | 0.601106 | 0.858 | 0.412 | 1.83E-19 | Mixed | SLC9A3R1   |
| 6857 | FCRL3.1    | 1.78E-23 | 0.388479 | 0.271 | 0.064 | 3.34E-19 | Mixed | FCRL3      |
| 6858 | MYO1F.3    | 1.79E-23 | 0.384188 | 0.51  | 0.169 | 3.36E-19 | Mixed | MYO1F      |
| 6859 | IRF1.2     | 1.98E-23 | 0.606935 | 0.839 | 0.402 | 3.72E-19 | Mixed | IRF1       |
| 6860 | RASSF1.1   | 2.02E-23 | 0.507391 | 0.529 | 0.186 | 3.79E-19 | Mixed | RASSF1     |
| 6861 | HLA-C.3    | 2.66E-23 | 0.629101 | 1     | 0.983 | 4.99E-19 | Mixed | HLA-C      |
| 6862 | ARL4C.4    | 3.77E-23 | 0.579915 | 0.665 | 0.265 | 7.08E-19 | Mixed | ARL4C      |
| 6863 | DOK2.4     | 4.93E-23 | 0.506787 | 0.594 | 0.22  | 9.26E-19 | Mixed | DOK2       |
| 6864 | CD22.3     | 5.51E-23 | 0.323897 | 0.387 | 0.11  | 1.04E-18 | Mixed | CD22       |
| 6865 | SLA2       | 5.85E-23 | 0.329881 | 0.258 | 0.06  | 1.10E-18 | Mixed | SLA2       |
| 6866 | FCGR2B.2   | 6.20E-23 | 0.26896  | 0.361 | 0.1   | 1.16E-18 | Mixed | FCGR2B     |
| 6867 | KLRG1.1    | 6.45E-23 | 0.472026 | 0.316 | 0.085 | 1.21E-18 | Mixed | KLRG1      |
| 6868 | EOMES      | 7.20E-23 | 0.255754 | 0.155 | 0.026 | 1.35E-18 | Mixed | EOMES      |
| 6869 | ACTN4.1    | 7.52E-23 | 0.367115 | 0.432 | 0.135 | 1.41E-18 | Mixed | ACTN4      |
| 6870 | KIR3DL1    | 8.48E-23 | 0.287011 | 0.103 | 0.013 | 1.59E-18 | Mixed | KIR3DL1    |
| 6871 | NAPSA.4    | 8.63E-23 | 0.353509 | 0.51  | 0.167 | 1.62E-18 | Mixed | NAPSA      |
| 6872 | POU2AF1.1  | 8.92E-23 | 0.298709 | 0.348 | 0.094 | 1.68E-18 | Mixed | POU2AF1    |
| 6873 | EBF2.2     | 1.91E-22 | 0.39207  | 0.484 | 0.161 | 3.59E-18 | Mixed | EBF2       |
| 6874 | BCL7A.1    | 1.94E-22 | 0.358661 | 0.29  | 0.074 | 3.65E-18 | Mixed | BCL7A      |
| 6875 | HCST.3     | 1.99E-22 | 0.597904 | 0.981 | 0.627 | 3.74E-18 | Mixed | HCST       |
| 6876 | SYTL3      | 2.00E-22 | 0.376303 | 0.265 | 0.064 | 3.75E-18 | Mixed | SYTL3      |
| 6877 | AC007384.1 | 2.57E-22 | 0.293627 | 0.284 | 0.071 | 4.83E-18 | Mixed | AC007384.1 |
| 6878 | ADAM28.2   | 5.00E-22 | 0.305479 | 0.316 | 0.084 | 9.39E-18 | Mixed | ADAM28     |
| 6879 | FCRLA.4    | 5.03E-22 | 0.329162 | 0.523 | 0.175 | 9.44E-18 | Mixed | FCRLA      |
| 6880 | RPL32.2    | 5.53E-22 | -0.479   | 1     | 0.995 | 1.04E-17 | Mixed | RPL32      |
| 6881 | NFATC2.2   | 7.02E-22 | 0.357425 | 0.361 | 0.104 | 1.32E-17 | Mixed | NFATC2     |
| 6882 | SRGN.3     | 7.49E-22 | 0.375794 | 0.865 | 0.403 | 1.41E-17 | Mixed | SRGN       |
| 6883 | STARD3NL   | 7.84E-22 | 0.456453 | 0.452 | 0.151 | 1.47E-17 | Mixed | STARD3NL   |
| 6884 | CEP78      | 1.05E-21 | 0.365153 | 0.265 | 0.066 | 1.97E-17 | Mixed | CEP78      |
| 6885 | SLAMF7.1   | 2.71E-21 | 0.305415 | 0.226 | 0.052 | 5.09E-17 | Mixed | SLAMF7     |
| 6886 | PRR5L      | 3.06E-21 | 0.25078  | 0.155 | 0.027 | 5.75E-17 | Mixed | PRR5L      |
| 6887 | CMC1.1     | 3.14E-21 | 0.475742 | 0.439 | 0.151 | 5.90E-17 | Mixed | CMC1       |
| 6888 | DHRS7.2    | 4.32E-21 | 0.55652  | 0.729 | 0.331 | 8.11E-17 | Mixed | DHRS7      |
| 6889 | SMIM14.3   | 5.47E-21 | 0.430718 | 0.516 | 0.182 | 1.03E-16 | Mixed | SMIM14     |

|      |           |          |          |       |       |          |       |            |
|------|-----------|----------|----------|-------|-------|----------|-------|------------|
| 6890 | TSEN54.3  | 6.24E-21 | 0.474456 | 0.477 | 0.166 | 1.17E-16 | Mixed | TSEN54     |
| 6891 | HLA-A.3   | 6.40E-21 | 0.560113 | 0.987 | 0.903 | 1.20E-16 | Mixed | HLA-A      |
| 6892 | IL12RB1   | 6.46E-21 | 0.330116 | 0.277 | 0.073 | 1.21E-16 | Mixed | IL12RB1    |
| 6893 | OPTN.3    | 9.40E-21 | 0.435742 | 0.51  | 0.182 | 1.77E-16 | Mixed | OPTN       |
| 6894 | SH3BGRL3  | 9.92E-21 | 0.447443 | 0.994 | 0.94  | 1.86E-16 | Mixed | SH3BGRL3   |
| 6895 | TRGC2     | 1.12E-20 | 0.317861 | 0.155 | 0.028 | 2.10E-16 | Mixed | TRGC2      |
| 6896 | SPN.2     | 1.13E-20 | 0.562911 | 0.523 | 0.198 | 2.12E-16 | Mixed | SPN        |
| 6897 | LPCAT1    | 1.15E-20 | 0.306912 | 0.297 | 0.08  | 2.16E-16 | Mixed | LPCAT1     |
| 6898 | RGS3      | 1.15E-20 | 0.278916 | 0.258 | 0.064 | 2.17E-16 | Mixed | RGS3       |
| 6899 | AC004865  | 2.56E-20 | 0.298022 | 0.232 | 0.055 | 4.82E-16 | Mixed | AC004865.2 |
| 6900 | ITGB2.4   | 2.57E-20 | 0.611405 | 0.974 | 0.646 | 4.84E-16 | Mixed | ITGB2      |
| 6901 | APOBEC3C  | 3.46E-20 | 0.43459  | 0.387 | 0.127 | 6.51E-16 | Mixed | APOBEC3C   |
| 6902 | CDK2AP2.1 | 4.11E-20 | 0.518968 | 0.735 | 0.32  | 7.72E-16 | Mixed | CDK2AP2    |
| 6903 | FGR.2     | 4.11E-20 | 0.26969  | 0.613 | 0.224 | 7.73E-16 | Mixed | FGR        |
| 6904 | CPNE5.2   | 5.00E-20 | 0.281464 | 0.232 | 0.056 | 9.39E-16 | Mixed | CPNE5      |
| 6905 | BCL11A.2  | 5.14E-20 | 0.322893 | 0.323 | 0.092 | 9.66E-16 | Mixed | BCL11A     |
| 6906 | TGFB1.3   | 6.51E-20 | 0.496533 | 0.677 | 0.285 | 1.22E-15 | Mixed | TGFB1      |
| 6907 | IFITM2.4  | 7.19E-20 | 0.316441 | 0.981 | 0.825 | 1.35E-15 | Mixed | IFITM2     |
| 6908 | GPR65.2   | 7.41E-20 | 0.367694 | 0.516 | 0.185 | 1.39E-15 | Mixed | GPR65      |
| 6909 | PRKCB.3   | 8.89E-20 | 0.391167 | 0.523 | 0.191 | 1.67E-15 | Mixed | PRKCB      |
| 6910 | MEF2C.3   | 1.19E-19 | 0.294967 | 0.561 | 0.211 | 2.24E-15 | Mixed | MEF2C      |
| 6911 | FLNA.4    | 1.41E-19 | 0.605338 | 0.723 | 0.351 | 2.65E-15 | Mixed | FLNA       |
| 6912 | CALHM6.3  | 2.15E-19 | 0.347617 | 0.587 | 0.223 | 4.04E-15 | Mixed | CALHM6     |
| 6913 | FYN.2     | 2.25E-19 | 0.458501 | 0.452 | 0.16  | 4.22E-15 | Mixed | FYN        |
| 6914 | PLEKHA2.1 | 2.28E-19 | 0.32738  | 0.361 | 0.112 | 4.28E-15 | Mixed | PLEKHA2    |
| 6915 | ORAI2.1   | 3.99E-19 | 0.348307 | 0.406 | 0.135 | 7.49E-15 | Mixed | ORAI2      |
| 6916 | PPP2R5C.3 | 4.55E-19 | 0.371053 | 0.548 | 0.206 | 8.55E-15 | Mixed | PPP2R5C    |
| 6917 | HSH2D.2   | 4.76E-19 | 0.419656 | 0.471 | 0.171 | 8.95E-15 | Mixed | HSH2D      |
| 6918 | ANXA2.3   | 5.22E-19 | 0.295281 | 0.729 | 0.303 | 9.80E-15 | Mixed | ANXA2      |
| 6919 | AOAH.3    | 5.44E-19 | 0.431186 | 0.381 | 0.128 | 1.02E-14 | Mixed | AOAH       |
| 6920 | ATP2B4.1  | 5.78E-19 | 0.339069 | 0.29  | 0.083 | 1.09E-14 | Mixed | ATP2B4     |
| 6921 | IKZF3.3   | 5.86E-19 | 0.377402 | 0.452 | 0.157 | 1.10E-14 | Mixed | IKZF3      |
| 6922 | HHEX.2    | 6.46E-19 | 0.271869 | 0.368 | 0.115 | 1.21E-14 | Mixed | HHEX       |
| 6923 | E2F5      | 7.01E-19 | 0.253518 | 0.155 | 0.03  | 1.32E-14 | Mixed | E2F5       |
| 6924 | BLNK.2    | 7.18E-19 | 0.261221 | 0.374 | 0.118 | 1.35E-14 | Mixed | BLNK       |
| 6925 | RUNX3.1   | 7.57E-19 | 0.384959 | 0.361 | 0.116 | 1.42E-14 | Mixed | RUNX3      |
| 6926 | DDIT4.2   | 8.06E-19 | 0.525572 | 0.465 | 0.174 | 1.51E-14 | Mixed | DDIT4      |
| 6927 | ZBP1.1    | 8.55E-19 | 0.361174 | 0.258 | 0.07  | 1.61E-14 | Mixed | ZBP1       |
| 6928 | ZEB2.2    | 1.16E-18 | 0.399909 | 0.426 | 0.148 | 2.18E-14 | Mixed | ZEB2       |
| 6929 | AFF3.3    | 1.37E-18 | 0.297219 | 0.368 | 0.116 | 2.58E-14 | Mixed | AFF3       |
| 6930 | ITGB7.4   | 1.54E-18 | 0.467664 | 0.606 | 0.248 | 2.89E-14 | Mixed | ITGB7      |
| 6931 | CD180.1   | 1.60E-18 | 0.311463 | 0.329 | 0.1   | 3.01E-14 | Mixed | CD180      |
| 6932 | OASL      | 2.69E-18 | 0.264212 | 0.187 | 0.042 | 5.05E-14 | Mixed | OASL       |
| 6933 | REL.3     | 3.99E-18 | 0.384705 | 0.581 | 0.231 | 7.50E-14 | Mixed | REL        |
| 6934 | SLAMF6.1  | 4.06E-18 | 0.30186  | 0.323 | 0.097 | 7.63E-14 | Mixed | SLAMF6     |
| 6935 | TSPAN3.4  | 4.17E-18 | 0.299079 | 0.548 | 0.206 | 7.83E-14 | Mixed | TSPAN3     |
| 6936 | TMX4.1    | 4.38E-18 | 0.381891 | 0.445 | 0.16  | 8.22E-14 | Mixed | TMX4       |

|      |            |          |          |       |       |          |       |            |
|------|------------|----------|----------|-------|-------|----------|-------|------------|
| 6937 | PLCG2.1    | 5.31E-18 | 0.347471 | 0.355 | 0.115 | 9.97E-14 | Mixed | PLCG2      |
| 6938 | GNPTAB.1   | 5.61E-18 | 0.430045 | 0.335 | 0.108 | 1.05E-13 | Mixed | GNPTAB     |
| 6939 | RPL11.2    | 7.78E-18 | -0.35707 | 1     | 0.995 | 1.46E-13 | Mixed | RPL11      |
| 6940 | TBC1D5.1   | 8.45E-18 | 0.367811 | 0.348 | 0.113 | 1.59E-13 | Mixed | TBC1D5     |
| 6941 | SAMD3.3    | 8.53E-18 | 0.373729 | 0.458 | 0.168 | 1.60E-13 | Mixed | SAMD3      |
| 6942 | RAB29.2    | 8.76E-18 | 0.464017 | 0.465 | 0.176 | 1.64E-13 | Mixed | RAB29      |
| 6943 | CAST.1     | 9.28E-18 | 0.445853 | 0.768 | 0.355 | 1.74E-13 | Mixed | CAST       |
| 6944 | TRGV2      | 9.43E-18 | 0.391754 | 0.103 | 0.016 | 1.77E-13 | Mixed | TRGV2      |
| 6945 | P2RY8.2    | 1.61E-17 | 0.395708 | 0.523 | 0.202 | 3.02E-13 | Mixed | P2RY8      |
| 6946 | RARRES3.3  | 1.65E-17 | 0.530547 | 0.923 | 0.554 | 3.10E-13 | Mixed | RARRES3    |
| 6947 | AC116366.1 | 1.76E-17 | 0.335983 | 0.439 | 0.155 | 3.30E-13 | Mixed | AC116366.3 |
| 6948 | RPL39.3    | 1.77E-17 | -0.5994  | 1     | 0.997 | 3.33E-13 | Mixed | RPL39      |
| 6949 | TFDP2.3    | 2.10E-17 | 0.280878 | 0.335 | 0.105 | 3.94E-13 | Mixed | TFDP2      |
| 6950 | ARPC2.4    | 2.15E-17 | 0.491543 | 0.987 | 0.859 | 4.03E-13 | Mixed | ARPC2      |
| 6951 | MIB2.1     | 3.20E-17 | 0.338861 | 0.335 | 0.108 | 6.02E-13 | Mixed | MIB2       |
| 6952 | PHACTR1.1  | 3.44E-17 | 0.256017 | 0.2   | 0.049 | 6.47E-13 | Mixed | PHACTR1    |
| 6953 | CD58.1     | 4.47E-17 | 0.341947 | 0.297 | 0.092 | 8.39E-13 | Mixed | CD58       |
| 6954 | GABARAPL1  | 5.44E-17 | 0.258487 | 0.168 | 0.037 | 1.02E-12 | Mixed | GABARAPL1  |
| 6955 | UBB.3      | 8.57E-17 | 0.48239  | 0.994 | 0.805 | 1.61E-12 | Mixed | UBB        |
| 6956 | NRROS.2    | 8.82E-17 | 0.325754 | 0.335 | 0.111 | 1.66E-12 | Mixed | NRROS      |
| 6957 | RPS28.3    | 8.93E-17 | -0.47282 | 1     | 0.995 | 1.68E-12 | Mixed | RPS28      |
| 6958 | XBP1.3     | 9.54E-17 | 0.462246 | 0.748 | 0.365 | 1.79E-12 | Mixed | XBP1       |
| 6959 | MSN.1      | 1.43E-16 | 0.564846 | 0.852 | 0.48  | 2.69E-12 | Mixed | MSN        |
| 6960 | RPS12.4    | 1.51E-16 | -0.47428 | 1     | 0.995 | 2.84E-12 | Mixed | RPS12      |
| 6961 | RPL30.2    | 1.89E-16 | -0.33983 | 1     | 0.997 | 3.55E-12 | Mixed | RPL30      |
| 6962 | SNX2.1     | 1.92E-16 | 0.413116 | 0.806 | 0.421 | 3.60E-12 | Mixed | SNX2       |
| 6963 | ZCCHC7.3   | 2.51E-16 | 0.374214 | 0.542 | 0.218 | 4.72E-12 | Mixed | ZCCHC7     |
| 6964 | PSMB9.1    | 2.92E-16 | 0.517481 | 0.942 | 0.68  | 5.49E-12 | Mixed | PSMB9      |
| 6965 | CD63.3     | 3.42E-16 | 0.430768 | 0.535 | 0.229 | 6.43E-12 | Mixed | CD63       |
| 6966 | MBP.2      | 3.63E-16 | 0.48512  | 0.658 | 0.306 | 6.82E-12 | Mixed | MBP        |
| 6967 | LEF1.4     | 4.17E-16 | -1.44101 | 0.123 | 0.432 | 7.83E-12 | Mixed | LEF1       |
| 6968 | PPP1CA.1   | 4.93E-16 | 0.496416 | 0.955 | 0.66  | 9.26E-12 | Mixed | PPP1CA     |
| 6969 | ADD1.1     | 6.46E-16 | 0.376555 | 0.465 | 0.182 | 1.21E-11 | Mixed | ADD1       |
| 6970 | ALOX5AP.3  | 6.93E-16 | 0.492293 | 0.697 | 0.36  | 1.30E-11 | Mixed | ALOX5AP    |
| 6971 | SH3BP5.2   | 7.05E-16 | 0.381897 | 0.561 | 0.235 | 1.33E-11 | Mixed | SH3BP5     |
| 6972 | PARP15.2   | 7.68E-16 | 0.328082 | 0.335 | 0.111 | 1.44E-11 | Mixed | PARP15     |
| 6973 | ARPC5L.1   | 9.40E-16 | 0.506317 | 0.652 | 0.317 | 1.77E-11 | Mixed | ARPC5L     |
| 6974 | VPS37B.1   | 9.64E-16 | 0.342808 | 0.387 | 0.14  | 1.81E-11 | Mixed | VPS37B     |
| 6975 | VAV3       | 9.77E-16 | 0.254525 | 0.161 | 0.037 | 1.84E-11 | Mixed | VAV3       |
| 6976 | SLC25A4.1  | 1.01E-15 | 0.256656 | 0.187 | 0.047 | 1.90E-11 | Mixed | SLC25A4    |
| 6977 | PRKCH.4    | 1.08E-15 | 0.33221  | 0.6   | 0.248 | 2.03E-11 | Mixed | PRKCH      |
| 6978 | PFN1.4     | 1.09E-15 | 0.370092 | 1     | 0.984 | 2.05E-11 | Mixed | PFN1       |
| 6979 | IFNGR1.1   | 1.29E-15 | 0.389465 | 0.529 | 0.22  | 2.42E-11 | Mixed | IFNGR1     |
| 6980 | SSBP4.3    | 1.33E-15 | 0.358847 | 0.426 | 0.161 | 2.49E-11 | Mixed | SSBP4      |
| 6981 | CD53.2     | 1.42E-15 | 0.534024 | 0.877 | 0.593 | 2.67E-11 | Mixed | CD53       |
| 6982 | IGHV4-59.1 | 1.42E-15 | 0.415677 | 0.123 | 0.024 | 2.67E-11 | Mixed | IGHV4-59   |
| 6983 | RNF41.1    | 1.61E-15 | 0.25089  | 0.31  | 0.1   | 3.03E-11 | Mixed | RNF41      |

|      |           |          |          |       |       |          |       |          |
|------|-----------|----------|----------|-------|-------|----------|-------|----------|
| 6984 | SP140.3   | 1.75E-15 | 0.304315 | 0.406 | 0.15  | 3.30E-11 | Mixed | SP140    |
| 6985 | CYB561A3. | 1.92E-15 | 0.369858 | 0.561 | 0.246 | 3.61E-11 | Mixed | CYB561A3 |
| 6986 | PLD4.2    | 2.03E-15 | 0.270597 | 0.316 | 0.104 | 3.81E-11 | Mixed | PLD4     |
| 6987 | CCDC32.3  | 2.25E-15 | 0.334987 | 0.419 | 0.159 | 4.23E-11 | Mixed | CCDC32   |
| 6988 | TRGV7     | 2.51E-15 | 0.30151  | 0.142 | 0.03  | 4.72E-11 | Mixed | TRGV7    |
| 6989 | NFATC3.1  | 2.65E-15 | 0.406977 | 0.406 | 0.156 | 4.98E-11 | Mixed | NFATC3   |
| 6990 | ABHD17A   | 2.89E-15 | 0.326995 | 0.297 | 0.097 | 5.42E-11 | Mixed | ABHD17A  |
| 6991 | CD82.2    | 3.67E-15 | 0.349119 | 0.471 | 0.186 | 6.89E-11 | Mixed | CD82     |
| 6992 | RPS15A.2  | 4.40E-15 | -0.39517 | 1     | 0.997 | 8.26E-11 | Mixed | RPS15A   |
| 6993 | CTDSP1.2  | 4.60E-15 | 0.331821 | 0.452 | 0.178 | 8.65E-11 | Mixed | CTDSP1   |
| 6994 | STK10.1   | 4.61E-15 | 0.427309 | 0.503 | 0.214 | 8.67E-11 | Mixed | STK10    |
| 6995 | KDM5A     | 4.76E-15 | 0.331827 | 0.432 | 0.167 | 8.94E-11 | Mixed | KDM5A    |
| 6996 | ARL6IP1   | 5.41E-15 | 0.359896 | 0.361 | 0.131 | 1.02E-10 | Mixed | ARL6IP1  |
| 6997 | DDAH2.3   | 5.56E-15 | 0.298552 | 0.413 | 0.156 | 1.05E-10 | Mixed | DDAH2    |
| 6998 | IDS       | 5.58E-15 | 0.408174 | 0.497 | 0.212 | 1.05E-10 | Mixed | IDS      |
| 6999 | IQGAP2.4  | 6.76E-15 | 0.309086 | 0.348 | 0.125 | 1.27E-10 | Mixed | IQGAP2   |
| 7000 | MVD       | 8.83E-15 | 0.281346 | 0.284 | 0.092 | 1.66E-10 | Mixed | MVD      |
| 7001 | RPS24.3   | 8.92E-15 | -0.38465 | 1     | 0.994 | 1.68E-10 | Mixed | RPS24    |
| 7002 | CCDC107.2 | 9.71E-15 | 0.383086 | 0.626 | 0.279 | 1.82E-10 | Mixed | CCDC107  |
| 7003 | GGA2.1    | 1.12E-14 | 0.278743 | 0.374 | 0.136 | 2.11E-10 | Mixed | GGA2     |
| 7004 | PPP3CC.2  | 1.14E-14 | 0.336713 | 0.555 | 0.236 | 2.14E-10 | Mixed | PPP3CC   |
| 7005 | LYN.3     | 1.28E-14 | 0.268592 | 0.561 | 0.235 | 2.41E-10 | Mixed | LYN      |
| 7006 | AKNA.1    | 1.37E-14 | 0.392505 | 0.529 | 0.226 | 2.57E-10 | Mixed | AKNA     |
| 7007 | ADCY7     | 1.42E-14 | 0.261759 | 0.284 | 0.092 | 2.67E-10 | Mixed | ADCY7    |
| 7008 | RAB37.2   | 1.72E-14 | 0.319384 | 0.4   | 0.153 | 3.23E-10 | Mixed | RAB37    |
| 7009 | TCF7.4    | 2.02E-14 | -1.5038  | 0.142 | 0.416 | 3.79E-10 | Mixed | TCF7     |
| 7010 | CYBA.4    | 2.17E-14 | 0.53805  | 0.961 | 0.73  | 4.08E-10 | Mixed | CYBA     |
| 7011 | GBP5.1    | 2.32E-14 | 0.393859 | 0.4   | 0.157 | 4.35E-10 | Mixed | GBP5     |
| 7012 | SMIM29.2  | 2.38E-14 | 0.33673  | 0.445 | 0.179 | 4.48E-10 | Mixed | SMIM29   |
| 7013 | LY6E.1    | 2.52E-14 | 0.530354 | 0.91  | 0.633 | 4.73E-10 | Mixed | LY6E     |
| 7014 | TRBC2.2   | 2.68E-14 | 0.570608 | 0.961 | 0.676 | 5.03E-10 | Mixed | TRBC2    |
| 7015 | PSMB10.1  | 3.41E-14 | 0.527974 | 0.89  | 0.587 | 6.40E-10 | Mixed | PSMB10   |
| 7016 | UBE2F.1   | 3.57E-14 | 0.365391 | 0.381 | 0.146 | 6.70E-10 | Mixed | UBE2F    |
| 7017 | MYO1G.2   | 3.60E-14 | 0.439445 | 0.574 | 0.268 | 6.76E-10 | Mixed | MYO1G    |
| 7018 | SIPA1.1   | 3.68E-14 | 0.303949 | 0.348 | 0.126 | 6.91E-10 | Mixed | SIPA1    |
| 7019 | AFF4      | 3.90E-14 | 0.354332 | 0.374 | 0.142 | 7.33E-10 | Mixed | AFF4     |
| 7020 | STX8      | 4.08E-14 | 0.300847 | 0.426 | 0.167 | 7.66E-10 | Mixed | STX8     |
| 7021 | TPT1.3    | 4.55E-14 | -0.5345  | 1     | 0.994 | 8.54E-10 | Mixed | TPT1     |
| 7022 | ITGB1.2   | 4.57E-14 | 0.386836 | 0.471 | 0.2   | 8.58E-10 | Mixed | ITGB1    |
| 7023 | RPL10.2   | 4.75E-14 | -0.29862 | 1     | 0.995 | 8.92E-10 | Mixed | RPL10    |
| 7024 | GSAP.1    | 4.84E-14 | 0.307474 | 0.258 | 0.082 | 9.09E-10 | Mixed | GSAP     |
| 7025 | CALM1.4   | 4.84E-14 | 0.42611  | 1     | 0.879 | 9.10E-10 | Mixed | CALM1    |
| 7026 | TRGV10    | 5.60E-14 | 0.386102 | 0.129 | 0.028 | 1.05E-09 | Mixed | TRGV10   |
| 7027 | TRBC1.4   | 5.61E-14 | 0.46202  | 0.613 | 0.303 | 1.05E-09 | Mixed | TRBC1    |
| 7028 | CD1C.1    | 5.77E-14 | 0.37377  | 0.194 | 0.053 | 1.08E-09 | Mixed | CD1C     |
| 7029 | RPL36.3   | 6.38E-14 | -0.46818 | 1     | 0.989 | 1.20E-09 | Mixed | RPL36    |
| 7030 | KIAA0040. | 6.70E-14 | 0.285119 | 0.426 | 0.167 | 1.26E-09 | Mixed | KIAA0040 |

|      |           |          |          |       |       |          |       |          |
|------|-----------|----------|----------|-------|-------|----------|-------|----------|
| 7031 | RPL22.2   | 8.05E-14 | -0.48093 | 0.994 | 0.977 | 1.51E-09 | Mixed | RPL22    |
| 7032 | MRPL10    | 8.30E-14 | 0.322011 | 0.4   | 0.157 | 1.56E-09 | Mixed | MRPL10   |
| 7033 | MBD4.1    | 8.52E-14 | 0.327849 | 0.516 | 0.22  | 1.60E-09 | Mixed | MBD4     |
| 7034 | INPP5D    | 1.15E-13 | 0.319372 | 0.374 | 0.143 | 2.16E-09 | Mixed | INPP5D   |
| 7035 | UBC.2     | 1.36E-13 | 0.424912 | 0.987 | 0.851 | 2.55E-09 | Mixed | UBC      |
| 7036 | RAB8A     | 1.56E-13 | 0.356257 | 0.594 | 0.266 | 2.92E-09 | Mixed | RAB8A    |
| 7037 | RPS9.2    | 1.58E-13 | -0.35237 | 1     | 0.992 | 2.98E-09 | Mixed | RPS9     |
| 7038 | RPS23.4   | 1.79E-13 | -0.25864 | 1     | 0.993 | 3.36E-09 | Mixed | RPS23    |
| 7039 | RPS4X.3   | 1.93E-13 | -0.38586 | 1     | 0.99  | 3.63E-09 | Mixed | RPS4X    |
| 7040 | ELOVL1.1  | 2.04E-13 | 0.295211 | 0.465 | 0.192 | 3.84E-09 | Mixed | ELOVL1   |
| 7041 | BPTF      | 2.18E-13 | 0.339366 | 0.432 | 0.177 | 4.10E-09 | Mixed | BPTF     |
| 7042 | SNX5.1    | 3.24E-13 | 0.281533 | 0.503 | 0.212 | 6.09E-09 | Mixed | SNX5     |
| 7043 | RHBDF2.1  | 5.18E-13 | 0.26981  | 0.29  | 0.102 | 9.73E-09 | Mixed | RHBDF2   |
| 7044 | CD38.2    | 5.24E-13 | 0.267879 | 0.303 | 0.107 | 9.85E-09 | Mixed | CD38     |
| 7045 | PPP1R12A  | 6.06E-13 | 0.372296 | 0.606 | 0.29  | 1.14E-08 | Mixed | PPP1R12A |
| 7046 | LHPP.3    | 6.66E-13 | 0.272702 | 0.4   | 0.158 | 1.25E-08 | Mixed | LHPP     |
| 7047 | ITGAL.3   | 6.74E-13 | 0.267943 | 0.381 | 0.149 | 1.27E-08 | Mixed | ITGAL    |
| 7048 | SELENOK.1 | 8.46E-13 | 0.362621 | 0.639 | 0.304 | 1.59E-08 | Mixed | SELENOK  |
| 7049 | NT5C.3    | 8.47E-13 | 0.387526 | 0.723 | 0.375 | 1.59E-08 | Mixed | NT5C     |
| 7050 | TAGLN2.3  | 8.60E-13 | 0.394204 | 0.981 | 0.771 | 1.62E-08 | Mixed | TAGLN2   |
| 7051 | REEP5.4   | 8.76E-13 | 0.32013  | 0.703 | 0.326 | 1.65E-08 | Mixed | REEP5    |
| 7052 | CDKN2D.2  | 1.37E-12 | 0.301894 | 0.458 | 0.196 | 2.58E-08 | Mixed | CDKN2D   |
| 7053 | RNF166.2  | 1.41E-12 | 0.331869 | 0.426 | 0.178 | 2.64E-08 | Mixed | RNF166   |
| 7054 | POU2F2.3  | 1.74E-12 | 0.294865 | 0.523 | 0.234 | 3.28E-08 | Mixed | POU2F2   |
| 7055 | DNAJC1.3  | 1.75E-12 | 0.325292 | 0.355 | 0.141 | 3.30E-08 | Mixed | DNAJC1   |
| 7056 | PDIA3.2   | 1.80E-12 | 0.418692 | 0.832 | 0.508 | 3.38E-08 | Mixed | PDIA3    |
| 7057 | RPL13.2   | 1.82E-12 | -0.27231 | 1     | 0.992 | 3.41E-08 | Mixed | RPL13    |
| 7058 | RPL18.2   | 2.12E-12 | -0.29187 | 1     | 0.991 | 3.98E-08 | Mixed | RPL18    |
| 7059 | MTSS1.3   | 2.15E-12 | 0.314348 | 0.374 | 0.149 | 4.04E-08 | Mixed | MTSS1    |
| 7060 | OFD1.2    | 2.28E-12 | 0.256698 | 0.465 | 0.194 | 4.28E-08 | Mixed | OFD1     |
| 7061 | KLF6.4    | 2.43E-12 | 0.338907 | 0.652 | 0.318 | 4.57E-08 | Mixed | KLF6     |
| 7062 | RPL29.3   | 2.81E-12 | -0.2875  | 1     | 0.993 | 5.28E-08 | Mixed | RPL29    |
| 7063 | ILK.2     | 2.88E-12 | 0.270145 | 0.574 | 0.258 | 5.40E-08 | Mixed | ILK      |
| 7064 | RORA.2    | 2.91E-12 | 0.290851 | 0.284 | 0.102 | 5.47E-08 | Mixed | RORA     |
| 7065 | PARP1.3   | 3.02E-12 | 0.364225 | 0.684 | 0.345 | 5.68E-08 | Mixed | PARP1    |
| 7066 | BACH2.3   | 3.59E-12 | 0.312971 | 0.465 | 0.201 | 6.74E-08 | Mixed | BACH2    |
| 7067 | FAM49B    | 3.85E-12 | 0.431317 | 0.768 | 0.428 | 7.23E-08 | Mixed | FAM49B   |
| 7068 | NOSIP.4   | 3.86E-12 | -1.21586 | 0.542 | 0.634 | 7.25E-08 | Mixed | NOSIP    |
| 7069 | ADPGK     | 3.91E-12 | 0.307778 | 0.432 | 0.184 | 7.34E-08 | Mixed | ADPGK    |
| 7070 | DSTN.2    | 4.09E-12 | 0.285877 | 0.594 | 0.272 | 7.69E-08 | Mixed | DSTN     |
| 7071 | RAP1B.2   | 4.23E-12 | 0.375662 | 0.929 | 0.624 | 7.95E-08 | Mixed | RAP1B    |
| 7072 | HSPA5.3   | 4.44E-12 | 0.358235 | 0.742 | 0.39  | 8.34E-08 | Mixed | HSPA5    |
| 7073 | CD83.1    | 5.25E-12 | 0.327427 | 0.226 | 0.073 | 9.86E-08 | Mixed | CD83     |
| 7074 | MOB2.1    | 5.42E-12 | 0.271986 | 0.4   | 0.164 | 1.02E-07 | Mixed | MOB2     |
| 7075 | G6PD.1    | 5.62E-12 | 0.34137  | 0.439 | 0.193 | 1.06E-07 | Mixed | G6PD     |
| 7076 | FAM3C.2   | 5.90E-12 | 0.356008 | 0.277 | 0.101 | 1.11E-07 | Mixed | FAM3C    |
| 7077 | BOD1L1.1  | 6.62E-12 | 0.268339 | 0.29  | 0.107 | 1.24E-07 | Mixed | BOD1L1   |

|      |            |          |          |       |       |          |       |          |
|------|------------|----------|----------|-------|-------|----------|-------|----------|
| 7078 | NBPF14.1   | 9.05E-12 | 0.261104 | 0.265 | 0.094 | 1.70E-07 | Mixed | NBPF14   |
| 7079 | EEF1A1.2   | 9.36E-12 | -0.3296  | 1     | 0.997 | 1.76E-07 | Mixed | EEF1A1   |
| 7080 | CD2BP2     | 9.82E-12 | 0.27081  | 0.458 | 0.2   | 1.84E-07 | Mixed | CD2BP2   |
| 7081 | LDHB.3     | 1.23E-11 | -1.10005 | 0.8   | 0.742 | 2.32E-07 | Mixed | LDHB     |
| 7082 | RGS10.3    | 1.29E-11 | -1.03297 | 0.361 | 0.532 | 2.43E-07 | Mixed | RGS10    |
| 7083 | UPF3A.1    | 1.36E-11 | 0.294572 | 0.458 | 0.202 | 2.56E-07 | Mixed | UPF3A    |
| 7084 | SYNE1.2    | 1.40E-11 | 0.345698 | 0.394 | 0.168 | 2.64E-07 | Mixed | SYNE1    |
| 7085 | FMNL1.2    | 1.42E-11 | 0.266965 | 0.432 | 0.187 | 2.67E-07 | Mixed | FMNL1    |
| 7086 | SYK.2      | 1.47E-11 | 0.250452 | 0.419 | 0.179 | 2.76E-07 | Mixed | SYK      |
| 7087 | UTRN.1     | 1.59E-11 | 0.36637  | 0.439 | 0.196 | 2.98E-07 | Mixed | UTRN     |
| 7088 | ATG12      | 1.62E-11 | 0.267121 | 0.458 | 0.198 | 3.05E-07 | Mixed | ATG12    |
| 7089 | HERPUD1.1  | 1.71E-11 | 0.317946 | 0.69  | 0.353 | 3.22E-07 | Mixed | HERPUD1  |
| 7090 | RPS5.4     | 1.78E-11 | -0.32464 | 1     | 0.984 | 3.34E-07 | Mixed | RPS5     |
| 7091 | CCDC12.1   | 1.90E-11 | 0.285616 | 0.606 | 0.29  | 3.57E-07 | Mixed | CCDC12   |
| 7092 | SYTL1.2    | 2.02E-11 | 0.375104 | 0.787 | 0.436 | 3.79E-07 | Mixed | SYTL1    |
| 7093 | RPS3A.3    | 2.10E-11 | -0.38657 | 1     | 0.991 | 3.94E-07 | Mixed | RPS3A    |
| 7094 | ERP44.1    | 2.32E-11 | 0.337192 | 0.516 | 0.247 | 4.37E-07 | Mixed | ERP44    |
| 7095 | HLA-E.3    | 2.44E-11 | 0.307735 | 0.994 | 0.956 | 4.59E-07 | Mixed | HLA-E    |
| 7096 | CD69.2     | 2.45E-11 | 0.278689 | 0.523 | 0.241 | 4.60E-07 | Mixed | CD69     |
| 7097 | TPM4.3     | 2.87E-11 | 0.252623 | 0.516 | 0.243 | 5.39E-07 | Mixed | TPM4     |
| 7098 | GLIPR1.2   | 3.17E-11 | 0.284799 | 0.503 | 0.229 | 5.95E-07 | Mixed | GLIPR1   |
| 7099 | CFL1.4     | 3.17E-11 | 0.306447 | 1     | 0.953 | 5.96E-07 | Mixed | CFL1     |
| 7100 | RPL9.2     | 3.69E-11 | -0.38342 | 1     | 0.984 | 6.94E-07 | Mixed | RPL9     |
| 7101 | IVNS1ABP.1 | 4.05E-11 | 0.301951 | 0.394 | 0.17  | 7.61E-07 | Mixed | IVNS1ABP |
| 7102 | PPP1R18.1  | 4.54E-11 | 0.422923 | 0.806 | 0.474 | 8.52E-07 | Mixed | PPP1R18  |
| 7103 | RAB9A.1    | 4.56E-11 | 0.293618 | 0.361 | 0.15  | 8.56E-07 | Mixed | RAB9A    |
| 7104 | MACF1.1    | 4.75E-11 | 0.287807 | 0.419 | 0.181 | 8.92E-07 | Mixed | MACF1    |
| 7105 | AIF1.4     | 4.92E-11 | -1.96003 | 0.058 | 0.288 | 9.25E-07 | Mixed | AIF1     |
| 7106 | YWHAZ.3    | 5.35E-11 | 0.363086 | 0.974 | 0.804 | 1.01E-06 | Mixed | YWHAZ    |
| 7107 | SHISA5     | 5.38E-11 | 0.381289 | 0.794 | 0.446 | 1.01E-06 | Mixed | SHISA5   |
| 7108 | DBI.1      | 5.60E-11 | 0.420628 | 0.91  | 0.598 | 1.05E-06 | Mixed | DBI      |
| 7109 | MAPRE2.2   | 5.77E-11 | 0.357719 | 0.432 | 0.2   | 1.08E-06 | Mixed | MAPRE2   |
| 7110 | FBXO7.1    | 5.79E-11 | 0.275287 | 0.548 | 0.257 | 1.09E-06 | Mixed | FBXO7    |
| 7111 | SLC52A2.1  | 6.30E-11 | 0.280652 | 0.31  | 0.124 | 1.18E-06 | Mixed | SLC52A2  |
| 7112 | JAK1.3     | 6.38E-11 | 0.387192 | 0.916 | 0.64  | 1.20E-06 | Mixed | JAK1     |
| 7113 | MPG.1      | 6.52E-11 | 0.320995 | 0.587 | 0.29  | 1.22E-06 | Mixed | MPG      |
| 7114 | EZR.2      | 6.73E-11 | 0.43303  | 0.742 | 0.421 | 1.26E-06 | Mixed | EZR      |
| 7115 | RPL34.3    | 6.86E-11 | -0.42945 | 1     | 0.995 | 1.29E-06 | Mixed | RPL34    |
| 7116 | CBLB.2     | 7.27E-11 | 0.258347 | 0.355 | 0.146 | 1.37E-06 | Mixed | CBLB     |
| 7117 | ATP2A3.2   | 7.36E-11 | 0.289543 | 0.426 | 0.187 | 1.38E-06 | Mixed | ATP2A3   |
| 7118 | STX7.2     | 7.52E-11 | 0.253167 | 0.477 | 0.22  | 1.41E-06 | Mixed | STX7     |
| 7119 | TMEM109.1  | 8.82E-11 | 0.329172 | 0.523 | 0.252 | 1.66E-06 | Mixed | TMEM109  |
| 7120 | TMED9.2    | 9.33E-11 | 0.366224 | 0.645 | 0.328 | 1.75E-06 | Mixed | TMED9    |
| 7121 | RPS8.3     | 9.40E-11 | -0.37896 | 1     | 0.992 | 1.77E-06 | Mixed | RPS8     |
| 7122 | LSP1.2     | 1.01E-10 | 0.346396 | 0.981 | 0.817 | 1.90E-06 | Mixed | LSP1     |
| 7123 | RPL12.3    | 1.14E-10 | -0.27989 | 1     | 0.992 | 2.14E-06 | Mixed | RPL12    |
| 7124 | ORMDL2     | 1.20E-10 | 0.310982 | 0.368 | 0.162 | 2.26E-06 | Mixed | ORMDL2   |

|      |            |          |          |       |       |          |       |          |
|------|------------|----------|----------|-------|-------|----------|-------|----------|
| 7125 | POLD4.2    | 1.65E-10 | 0.333217 | 0.884 | 0.548 | 3.10E-06 | Mixed | POLD4    |
| 7126 | UCP2.4     | 1.68E-10 | 0.376382 | 0.974 | 0.779 | 3.16E-06 | Mixed | UCP2     |
| 7127 | TBCB       | 1.83E-10 | 0.320926 | 0.755 | 0.425 | 3.43E-06 | Mixed | TBCB     |
| 7128 | WASHC4.2   | 1.93E-10 | 0.264839 | 0.439 | 0.198 | 3.62E-06 | Mixed | WASHC4   |
| 7129 | SMARCB1.   | 2.02E-10 | 0.273179 | 0.632 | 0.317 | 3.79E-06 | Mixed | SMARCB1  |
| 7130 | MTPN.3     | 2.02E-10 | 0.289025 | 0.684 | 0.352 | 3.79E-06 | Mixed | MTPN     |
| 7131 | ARIH2      | 2.10E-10 | 0.282991 | 0.51  | 0.239 | 3.94E-06 | Mixed | ARIH2    |
| 7132 | IFI16.2    | 2.19E-10 | 0.338666 | 0.606 | 0.306 | 4.12E-06 | Mixed | IFI16    |
| 7133 | BTN3A2.3   | 2.22E-10 | 0.280923 | 0.535 | 0.253 | 4.16E-06 | Mixed | BTN3A2   |
| 7134 | DCAF7      | 2.24E-10 | 0.262758 | 0.465 | 0.214 | 4.21E-06 | Mixed | DCAF7    |
| 7135 | LRP10      | 2.28E-10 | 0.277904 | 0.516 | 0.243 | 4.29E-06 | Mixed | LRP10    |
| 7136 | CCND3.3    | 2.42E-10 | 0.403433 | 0.89  | 0.586 | 4.54E-06 | Mixed | CCND3    |
| 7137 | ZNF24.2    | 2.45E-10 | 0.307572 | 0.535 | 0.263 | 4.59E-06 | Mixed | ZNF24    |
| 7138 | EMP3.4     | 2.53E-10 | 0.332318 | 0.981 | 0.788 | 4.75E-06 | Mixed | EMP3     |
| 7139 | RPS25.2    | 2.63E-10 | -0.3215  | 1     | 0.991 | 4.94E-06 | Mixed | RPS25    |
| 7140 | CYB5B      | 2.65E-10 | 0.252311 | 0.374 | 0.162 | 4.98E-06 | Mixed | CYB5B    |
| 7141 | RSBN1L.1   | 2.67E-10 | 0.291507 | 0.523 | 0.25  | 5.02E-06 | Mixed | RSBN1L   |
| 7142 | MIEN1.2    | 2.79E-10 | 0.284207 | 0.69  | 0.36  | 5.25E-06 | Mixed | MIEN1    |
| 7143 | FBXW5      | 3.30E-10 | 0.28136  | 0.503 | 0.244 | 6.20E-06 | Mixed | FBXW5    |
| 7144 | RPL18A.3   | 3.32E-10 | -0.25139 | 1     | 0.992 | 6.23E-06 | Mixed | RPL18A   |
| 7145 | RPS27A.2   | 3.37E-10 | -0.26349 | 1     | 0.995 | 6.33E-06 | Mixed | RPS27A   |
| 7146 | BST2.2     | 3.44E-10 | 0.328692 | 0.774 | 0.437 | 6.47E-06 | Mixed | BST2     |
| 7147 | PPIB.2     | 3.46E-10 | 0.268415 | 0.961 | 0.79  | 6.51E-06 | Mixed | PPIB     |
| 7148 | RNF213.4   | 3.61E-10 | 0.405309 | 0.69  | 0.396 | 6.79E-06 | Mixed | RNF213   |
| 7149 | YIPF3      | 4.10E-10 | 0.257567 | 0.49  | 0.231 | 7.70E-06 | Mixed | YIPF3    |
| 7150 | IER2.3     | 4.10E-10 | 0.288006 | 0.826 | 0.496 | 7.70E-06 | Mixed | IER2     |
| 7151 | CISD3.2    | 4.22E-10 | 0.275557 | 0.406 | 0.185 | 7.93E-06 | Mixed | CISD3    |
| 7152 | COMMD8     | 4.49E-10 | 0.251124 | 0.452 | 0.208 | 8.44E-06 | Mixed | COMMD8   |
| 7153 | PTPN6.3    | 4.50E-10 | 0.379263 | 0.852 | 0.603 | 8.46E-06 | Mixed | PTPN6    |
| 7154 | WIPF1.2    | 4.52E-10 | 0.271784 | 0.594 | 0.297 | 8.48E-06 | Mixed | WIPF1    |
| 7155 | CAPN2.3    | 4.52E-10 | 0.252793 | 0.432 | 0.2   | 8.50E-06 | Mixed | CAPN2    |
| 7156 | MAL.4      | 4.69E-10 | -0.9384  | 0.052 | 0.269 | 8.80E-06 | Mixed | MAL      |
| 7157 | IFI27L2.2  | 5.03E-10 | 0.258134 | 0.458 | 0.218 | 9.45E-06 | Mixed | IFI27L2  |
| 7158 | BCL2L1     | 5.16E-10 | 0.264616 | 0.226 | 0.082 | 9.70E-06 | Mixed | BCL2L1   |
| 7159 | UVRAG.2    | 5.22E-10 | 0.25482  | 0.406 | 0.183 | 9.81E-06 | Mixed | UVRAG    |
| 7160 | ANXA6.3    | 6.50E-10 | 0.396823 | 0.858 | 0.581 | 1.22E-05 | Mixed | ANXA6    |
| 7161 | ATP6V0D1   | 6.54E-10 | 0.2777   | 0.626 | 0.319 | 1.23E-05 | Mixed | ATP6V0D1 |
| 7162 | DUSP23.3   | 6.82E-10 | 0.256565 | 0.348 | 0.15  | 1.28E-05 | Mixed | DUSP23   |
| 7163 | RPLP1.3    | 7.02E-10 | -0.27208 | 1     | 0.997 | 1.32E-05 | Mixed | RPLP1    |
| 7164 | RPS6KA1.1  | 7.85E-10 | 0.300869 | 0.484 | 0.236 | 1.47E-05 | Mixed | RPS6KA1  |
| 7165 | IGHV4-34.1 | 8.07E-10 | 1.014955 | 0.123 | 0.033 | 1.52E-05 | Mixed | IGHV4-34 |
| 7166 | IGKV3-11.1 | 8.75E-10 | 0.902601 | 0.103 | 0.025 | 1.64E-05 | Mixed | IGKV3-11 |
| 7167 | APPL1.1    | 9.23E-10 | 0.250522 | 0.452 | 0.215 | 1.73E-05 | Mixed | APPL1    |
| 7168 | YPEL3.1    | 9.43E-10 | 0.264385 | 0.452 | 0.214 | 1.77E-05 | Mixed | YPEL3    |
| 7169 | RASAL3.3   | 1.06E-09 | 0.304465 | 0.523 | 0.26  | 1.99E-05 | Mixed | RASAL3   |
| 7170 | ARFGAP3.1  | 1.09E-09 | 0.305853 | 0.342 | 0.151 | 2.05E-05 | Mixed | ARFGAP3  |
| 7171 | SYNGR2.2   | 1.18E-09 | 0.282303 | 0.845 | 0.513 | 2.23E-05 | Mixed | SYNGR2   |

|      |           |          |          |       |       |          |       |         |
|------|-----------|----------|----------|-------|-------|----------|-------|---------|
| 7172 | RPS21.3   | 1.20E-09 | -0.42357 | 1     | 0.987 | 2.25E-05 | Mixed | RPS21   |
| 7173 | TERF2IP   | 1.22E-09 | 0.313366 | 0.619 | 0.328 | 2.28E-05 | Mixed | TERF2IP |
| 7174 | ACTN1.3   | 1.29E-09 | -0.82055 | 0.052 | 0.259 | 2.43E-05 | Mixed | ACTN1   |
| 7175 | TRIR.1    | 1.32E-09 | 0.391318 | 0.884 | 0.567 | 2.47E-05 | Mixed | TRIR    |
| 7176 | SKAP1.4   | 1.36E-09 | 0.32865  | 0.665 | 0.362 | 2.55E-05 | Mixed | SKAP1   |
| 7177 | TMBIM6.2  | 1.82E-09 | 0.333806 | 0.948 | 0.694 | 3.41E-05 | Mixed | TMBIM6  |
| 7178 | RHOA.2    | 2.10E-09 | 0.304554 | 0.994 | 0.873 | 3.94E-05 | Mixed | RHOA    |
| 7179 | TAP1.2    | 2.32E-09 | 0.338413 | 0.645 | 0.367 | 4.35E-05 | Mixed | TAP1    |
| 7180 | ZNF207    | 2.39E-09 | 0.299485 | 0.619 | 0.326 | 4.49E-05 | Mixed | ZNF207  |
| 7181 | RPL5.3    | 2.45E-09 | -0.30524 | 1     | 0.984 | 4.61E-05 | Mixed | RPL5    |
| 7182 | PDIA6.2   | 2.78E-09 | 0.317635 | 0.652 | 0.365 | 5.22E-05 | Mixed | PDIA6   |
| 7183 | GPAA1.1   | 3.05E-09 | 0.310733 | 0.458 | 0.229 | 5.73E-05 | Mixed | GPAA1   |
| 7184 | NDUFB7.3  | 3.35E-09 | 0.3342   | 0.761 | 0.456 | 6.29E-05 | Mixed | NDUFB7  |
| 7185 | SYNRG.1   | 3.43E-09 | 0.251088 | 0.439 | 0.209 | 6.43E-05 | Mixed | SYNRG   |
| 7186 | SASH3.1   | 3.47E-09 | 0.346886 | 0.6   | 0.331 | 6.53E-05 | Mixed | SASH3   |
| 7187 | TBRG1.1   | 3.92E-09 | 0.266277 | 0.561 | 0.285 | 7.36E-05 | Mixed | TBRG1   |
| 7188 | OSTF1.2   | 3.94E-09 | 0.325079 | 0.774 | 0.457 | 7.40E-05 | Mixed | OSTF1   |
| 7189 | CSK.3     | 4.49E-09 | 0.365246 | 0.781 | 0.5   | 8.44E-05 | Mixed | CSK     |
| 7190 | KMT2E.2   | 4.56E-09 | 0.32041  | 0.768 | 0.447 | 8.56E-05 | Mixed | KMT2E   |
| 7191 | IL7R.4    | 4.64E-09 | -1.37236 | 0.284 | 0.468 | 8.71E-05 | Mixed | IL7R    |
| 7192 | FCMR.4    | 5.04E-09 | 0.297228 | 0.897 | 0.575 | 9.47E-05 | Mixed | FCMR    |
| 7193 | CALR.2    | 6.04E-09 | 0.369538 | 0.884 | 0.603 | 0.000113 | Mixed | CALR    |
| 7194 | CCR7.4    | 6.19E-09 | -1.16747 | 0.452 | 0.539 | 0.000116 | Mixed | CCR7    |
| 7195 | MT-CO1.1  | 6.21E-09 | 0.282771 | 1     | 0.996 | 0.000117 | Mixed | MT-CO1  |
| 7196 | FDFT1.4   | 6.27E-09 | 0.299411 | 0.677 | 0.377 | 0.000118 | Mixed | FDFT1   |
| 7197 | TMED10.1  | 6.91E-09 | 0.321375 | 0.606 | 0.328 | 0.00013  | Mixed | TMED10  |
| 7198 | PFKL.1    | 7.49E-09 | 0.282568 | 0.529 | 0.276 | 0.000141 | Mixed | PFKL    |
| 7199 | CD7.4     | 7.58E-09 | 0.360227 | 0.884 | 0.574 | 0.000142 | Mixed | CD7     |
| 7200 | EEF1B2.3  | 9.72E-09 | -0.39774 | 1     | 0.968 | 0.000183 | Mixed | EEF1B2  |
| 7201 | PSMB8     | 9.96E-09 | 0.357045 | 0.91  | 0.671 | 0.000187 | Mixed | PSMB8   |
| 7202 | NACA.3    | 1.09E-08 | -0.26446 | 1     | 0.991 | 0.000205 | Mixed | NACA    |
| 7203 | S100A11.2 | 1.11E-08 | -0.72647 | 0.845 | 0.467 | 0.000209 | Mixed | S100A11 |
| 7204 | HLA-F.2   | 1.19E-08 | 0.298906 | 0.832 | 0.502 | 0.000223 | Mixed | HLA-F   |
| 7205 | FAM96A.2  | 1.24E-08 | 0.268706 | 0.645 | 0.352 | 0.000233 | Mixed | FAM96A  |
| 7206 | RPL8.3    | 1.24E-08 | -0.26014 | 1     | 0.992 | 0.000233 | Mixed | RPL8    |
| 7207 | SNX3.2    | 1.31E-08 | 0.288164 | 0.839 | 0.533 | 0.000247 | Mixed | SNX3    |
| 7208 | GZMK      | 1.36E-08 | 0.258109 | 0.142 | 0.045 | 0.000256 | Mixed | GZMK    |
| 7209 | RPL35A.3  | 1.49E-08 | -0.34256 | 0.994 | 0.989 | 0.000279 | Mixed | RPL35A  |
| 7210 | SP100.3   | 1.68E-08 | 0.369818 | 0.768 | 0.472 | 0.000316 | Mixed | SP100   |
| 7211 | YWHAQ.2   | 1.81E-08 | 0.315737 | 0.69  | 0.41  | 0.000339 | Mixed | YWHAQ   |
| 7212 | JCHAIN.3  | 1.87E-08 | -0.94571 | 0.271 | 0.11  | 0.000351 | Mixed | JCHAIN  |
| 7213 | RNF167.2  | 1.88E-08 | 0.323348 | 0.632 | 0.356 | 0.000353 | Mixed | RNF167  |
| 7214 | RACK1.3   | 2.01E-08 | -0.2809  | 1     | 0.986 | 0.000378 | Mixed | RACK1   |
| 7215 | SELENOT   | 2.06E-08 | 0.300343 | 0.652 | 0.372 | 0.000386 | Mixed | SELENOT |
| 7216 | ZAP70.4   | 2.20E-08 | 0.27782  | 0.658 | 0.373 | 0.000413 | Mixed | ZAP70   |
| 7217 | PUF60.1   | 2.39E-08 | 0.26049  | 0.697 | 0.388 | 0.000448 | Mixed | PUF60   |
| 7218 | RPL14.3   | 2.56E-08 | -0.26469 | 1     | 0.989 | 0.000481 | Mixed | RPL14   |



|      |            |          |          |       |       |          |       |          |
|------|------------|----------|----------|-------|-------|----------|-------|----------|
| 7219 | CD47.1     | 2.70E-08 | 0.320896 | 0.781 | 0.469 | 0.000507 | Mixed | CD47     |
| 7220 | IL32.4     | 2.90E-08 | 0.281471 | 0.819 | 0.567 | 0.000545 | Mixed | IL32     |
| 7221 | RPS6.3     | 3.03E-08 | -0.30371 | 1     | 0.989 | 0.00057  | Mixed | RPS6     |
| 7222 | PAXX.3     | 3.18E-08 | 0.292109 | 0.871 | 0.545 | 0.000598 | Mixed | PAXX     |
| 7223 | RGS19.3    | 3.26E-08 | 0.297545 | 0.71  | 0.407 | 0.000612 | Mixed | RGS19    |
| 7224 | ORMDL1     | 3.29E-08 | 0.254069 | 0.516 | 0.268 | 0.000617 | Mixed | ORMDL1   |
| 7225 | PABPC1.2   | 3.78E-08 | -0.41578 | 1     | 0.942 | 0.000709 | Mixed | PABPC1   |
| 7226 | RBX1.1     | 3.87E-08 | 0.316788 | 0.832 | 0.515 | 0.000726 | Mixed | RBX1     |
| 7227 | DBNL.3     | 4.27E-08 | 0.274565 | 0.665 | 0.381 | 0.000801 | Mixed | DBNL     |
| 7228 | SQSTM1.1   | 4.58E-08 | 0.31418  | 0.723 | 0.44  | 0.000861 | Mixed | SQSTM1   |
| 7229 | LRRFIP1.2  | 5.03E-08 | 0.27262  | 0.761 | 0.454 | 0.000944 | Mixed | LRRFIP1  |
| 7230 | POLR3GL.2  | 5.17E-08 | 0.266755 | 0.523 | 0.275 | 0.000971 | Mixed | POLR3GL  |
| 7231 | KIAA1551.. | 5.69E-08 | 0.251651 | 0.535 | 0.277 | 0.001068 | Mixed | KIAA1551 |
| 7232 | SRPK2.1    | 5.69E-08 | 0.256034 | 0.503 | 0.266 | 0.001069 | Mixed | SRPK2    |
| 7233 | RALY       | 5.78E-08 | 0.308582 | 0.71  | 0.427 | 0.001085 | Mixed | RALY     |
| 7234 | RPS18.3    | 6.15E-08 | -0.2656  | 1     | 0.991 | 0.001156 | Mixed | RPS18    |
| 7235 | IDH2.1     | 7.18E-08 | 0.256307 | 0.516 | 0.269 | 0.001348 | Mixed | IDH2     |
| 7236 | MYL12B.2   | 7.49E-08 | 0.285609 | 0.974 | 0.795 | 0.001406 | Mixed | MYL12B   |
| 7237 | CAP1.4     | 7.62E-08 | 0.260308 | 0.916 | 0.58  | 0.001432 | Mixed | CAP1     |
| 7238 | PSMD4      | 9.61E-08 | 0.259055 | 0.71  | 0.395 | 0.001806 | Mixed | PSMD4    |
| 7239 | DCTN3.1    | 9.75E-08 | 0.254959 | 0.652 | 0.365 | 0.001831 | Mixed | DCTN3    |
| 7240 | LMAN2.1    | 1.01E-07 | 0.266706 | 0.703 | 0.403 | 0.001888 | Mixed | LMAN2    |
| 7241 | UBE2L3.1   | 1.09E-07 | 0.2936   | 0.574 | 0.324 | 0.002052 | Mixed | UBE2L3   |
| 7242 | RPS14.3    | 1.15E-07 | -0.30881 | 1     | 0.991 | 0.002163 | Mixed | RPS14    |
| 7243 | ATRX.1     | 1.62E-07 | 0.326972 | 0.555 | 0.316 | 0.003037 | Mixed | ATRX     |
| 7244 | TRIM22.2   | 2.00E-07 | 0.325243 | 0.652 | 0.392 | 0.003758 | Mixed | TRIM22   |
| 7245 | RAC2.3     | 2.11E-07 | 0.296906 | 0.994 | 0.907 | 0.003964 | Mixed | RAC2     |
| 7246 | PSMA6.2    | 2.83E-07 | 0.253854 | 0.69  | 0.4   | 0.005324 | Mixed | PSMA6    |
| 7247 | SRSF7.1    | 2.89E-07 | 0.270894 | 0.852 | 0.55  | 0.005426 | Mixed | SRSF7    |
| 7248 | HIST1H1E.. | 2.99E-07 | 0.27078  | 0.4   | 0.208 | 0.005611 | Mixed | HIST1H1E |
| 7249 | ENSA.1     | 3.01E-07 | 0.250062 | 0.606 | 0.346 | 0.005645 | Mixed | ENSA     |
| 7250 | CD4.3      | 3.64E-07 | -0.54984 | 0.006 | 0.154 | 0.006833 | Mixed | CD4      |
| 7251 | IFITM3.4   | 4.06E-07 | -0.39023 | 0.845 | 0.549 | 0.007633 | Mixed | IFITM3   |
| 7252 | SET.3      | 4.07E-07 | 0.278792 | 0.645 | 0.388 | 0.007648 | Mixed | SET      |
| 7253 | RNPS1.2    | 4.93E-07 | 0.269508 | 0.748 | 0.448 | 0.009269 | Mixed | RNPS1    |
| 7254 | ARF1.1     | 5.37E-07 | 0.293559 | 0.897 | 0.625 | 0.010088 | Mixed | ARF1     |
| 7255 | GNB2.2     | 5.44E-07 | 0.271518 | 0.677 | 0.407 | 0.010216 | Mixed | GNB2     |
| 7256 | S100A8.3   | 5.68E-07 | -4.9808  | 0.077 | 0.24  | 0.010669 | Mixed | S100A8   |
| 7257 | CD52.4     | 5.79E-07 | 0.293354 | 0.948 | 0.825 | 0.01087  | Mixed | CD52     |
| 7258 | RCSD1.1    | 6.11E-07 | 0.255396 | 0.716 | 0.43  | 0.011485 | Mixed | RCSD1    |
| 7259 | TCF25      | 7.00E-07 | 0.250246 | 0.658 | 0.407 | 0.01315  | Mixed | TCF25    |
| 7260 | GUK1.1     | 7.35E-07 | 0.276613 | 0.884 | 0.605 | 0.013799 | Mixed | GUK1     |
| 7261 | SEPT7.2    | 7.35E-07 | 0.262461 | 0.89  | 0.652 | 0.013808 | Mixed | Sep-07   |
| 7262 | PGAM1.3    | 7.68E-07 | 0.26175  | 0.781 | 0.496 | 0.014421 | Mixed | PGAM1    |
| 7263 | YWHAB.4    | 9.10E-07 | 0.269598 | 0.987 | 0.808 | 0.01709  | Mixed | YWHAB    |
| 7264 | BEX3.4     | 9.55E-07 | -0.62028 | 0.032 | 0.183 | 0.017947 | Mixed | BEX3     |
| 7265 | DDOST.3    | 1.04E-06 | 0.305447 | 0.69  | 0.439 | 0.019549 | Mixed | DDOST    |

|      |           |           |          |       |       |           |            |            |
|------|-----------|-----------|----------|-------|-------|-----------|------------|------------|
| 7266 | VCP.1     | 1.09E-06  | 0.251085 | 0.69  | 0.403 | 0.02039   | Mixed      | VCP        |
| 7267 | NPM1.3    | 1.14E-06  | -0.40805 | 0.974 | 0.91  | 0.021381  | Mixed      | NPM1       |
| 7268 | ZFP36L2.3 | 1.23E-06  | 0.327631 | 0.877 | 0.628 | 0.023074  | Mixed      | ZFP36L2    |
| 7269 | RPL37.3   | 1.27E-06  | -0.33929 | 0.987 | 0.98  | 0.023928  | Mixed      | RPL37      |
| 7270 | MT-ND5    | 1.85E-06  | 0.373476 | 0.865 | 0.715 | 0.034814  | Mixed      | MT-ND5     |
| 7271 | DRAP1.2   | 2.11E-06  | 0.278007 | 0.813 | 0.539 | 0.039552  | Mixed      | DRAP1      |
| 7272 | SELENOF.2 | 2.17E-06  | 0.254826 | 0.755 | 0.457 | 0.040806  | Mixed      | SELENOF    |
| 7273 | SCP2.1    | 2.23E-06  | 0.25148  | 0.574 | 0.336 | 0.04183   | Mixed      | SCP2       |
| 7274 | PSME1     | 2.24E-06  | 0.266484 | 0.974 | 0.859 | 0.042089  | Mixed      | PSME1      |
| 7275 | TRABD2A.4 | 2.32E-06  | -0.58041 | 0.039 | 0.181 | 0.043504  | Mixed      | TRABD2A    |
| 7344 | HBB.2     | 0         | 10.7474  | 0.995 | 0.082 | 0         | Erythrocyt | HBB        |
| 7345 | HBA2      | 0         | 7.957772 | 0.995 | 0.008 | 0         | Erythrocyt | HBA2       |
| 7346 | HBA1      | 0         | 7.782014 | 0.976 | 0.006 | 0         | Erythrocyt | HBA1       |
| 7347 | ALAS2     | 0         | 5.420347 | 0.636 | 0.001 | 0         | Erythrocyt | ALAS2      |
| 7348 | SLC25A37. | 0         | 3.800555 | 0.898 | 0.107 | 0         | Erythrocyt | SLC25A37   |
| 7349 | HBG2      | 0         | 3.784732 | 0.121 | 0.001 | 0         | Erythrocyt | HBG2       |
| 7350 | HBM       | 0         | 3.330771 | 0.553 | 0.001 | 0         | Erythrocyt | HBM        |
| 7351 | HBD       | 0         | 3.245364 | 0.476 | 0.002 | 0         | Erythrocyt | HBD        |
| 7352 | SNCA.1    | 0         | 3.21195  | 0.587 | 0.016 | 0         | Erythrocyt | SNCA       |
| 7353 | CA1       | 0         | 3.035661 | 0.33  | 0     | 0         | Erythrocyt | CA1        |
| 7354 | AHSP      | 0         | 2.506809 | 0.354 | 0     | 0         | Erythrocyt | AHSP       |
| 7355 | SELENBP1  | 0         | 2.060262 | 0.417 | 0     | 0         | Erythrocyt | SELENBP1   |
| 7356 | TRIM58.1  | 0         | 2.038787 | 0.5   | 0.012 | 0         | Erythrocyt | TRIM58     |
| 7357 | GMPR      | 0         | 1.473507 | 0.369 | 0.01  | 0         | Erythrocyt | GMPR       |
| 7358 | DMTN      | 0         | 1.382984 | 0.374 | 0.007 | 0         | Erythrocyt | DMTN       |
| 7359 | HBQ1      | 0         | 1.376358 | 0.403 | 0.003 | 0         | Erythrocyt | HBQ1       |
| 7360 | PDZK1IP1  | 0         | 1.213997 | 0.296 | 0.001 | 0         | Erythrocyt | PDZK1IP1   |
| 7361 | MYL4      | 0         | 1.15185  | 0.306 | 0.001 | 0         | Erythrocyt | MYL4       |
| 7362 | SLC4A1    | 0         | 1.103972 | 0.282 | 0     | 0         | Erythrocyt | SLC4A1     |
| 7363 | TMOD1     | 0         | 0.840665 | 0.194 | 0.001 | 0         | Erythrocyt | TMOD1      |
| 7364 | EPB42     | 0         | 0.804164 | 0.184 | 0     | 0         | Erythrocyt | EPB42      |
| 7365 | PHOSPHO1  | 0         | 0.736036 | 0.218 | 0.001 | 0         | Erythrocyt | PHOSPHO1   |
| 7366 | GYPB      | 0         | 0.715676 | 0.175 | 0     | 0         | Erythrocyt | GYPB       |
| 7367 | HBG1      | 0         | 0.652833 | 0.112 | 0     | 0         | Erythrocyt | HBG1       |
| 7368 | LINC00570 | 0         | 0.547248 | 0.141 | 0     | 0         | Erythrocyt | LINC00570  |
| 7369 | AC130456. | 0         | 0.490726 | 0.141 | 0     | 0         | Erythrocyt | AC130456.3 |
| 7370 | FAM210B   | 5.20E-295 | 1.690362 | 0.505 | 0.034 | 9.76E-291 | Erythrocyt | FAM210B    |
| 7371 | SMOX      | 3.07E-246 | 1.612146 | 0.214 | 0.007 | 5.77E-242 | Erythrocyt | SMOX       |
| 7372 | DCAF12    | 1.67E-192 | 2.673564 | 0.573 | 0.07  | 3.13E-188 | Erythrocyt | DCAF12     |
| 7373 | YOD1      | 2.10E-131 | 0.655787 | 0.199 | 0.011 | 3.95E-127 | Erythrocyt | YOD1       |
| 7374 | STRADB    | 5.19E-116 | 2.195204 | 0.524 | 0.093 | 9.76E-112 | Erythrocyt | STRADB     |
| 7375 | NFIX      | 5.41E-116 | 0.492056 | 0.15  | 0.007 | 1.02E-111 | Erythrocyt | NFIX       |
| 7376 | IFI27     | 6.60E-97  | 0.90921  | 0.141 | 0.008 | 1.24E-92  | Erythrocyt | IFI27      |
| 7377 | BCL2L1.1  | 5.01E-94  | 1.828281 | 0.451 | 0.081 | 9.41E-90  | Erythrocyt | BCL2L1     |
| 7378 | SLC25A39. | 2.22E-92  | 2.841436 | 0.757 | 0.283 | 4.17E-88  | Erythrocyt | SLC25A39   |
| 7379 | TENT5C.1  | 9.98E-81  | 1.110534 | 0.354 | 0.054 | 1.87E-76  | Erythrocyt | TENT5C     |
| 7380 | MPP1.3    | 8.80E-77  | 1.691994 | 0.451 | 0.095 | 1.65E-72  | Erythrocyt | MPP1       |

|      |           |          |          |       |       |          |            |          |
|------|-----------|----------|----------|-------|-------|----------|------------|----------|
| 7381 | SMIM1.1   | 7.36E-74 | 0.644082 | 0.184 | 0.017 | 1.38E-69 | Erythrocyt | SMIM1    |
| 7382 | ADIPOR1   | 2.56E-71 | 2.515526 | 0.66  | 0.251 | 4.82E-67 | Erythrocyt | ADIPOR1  |
| 7383 | BPGM      | 6.79E-69 | 1.265304 | 0.316 | 0.051 | 1.28E-64 | Erythrocyt | BPGM     |
| 7384 | SLC14A1   | 9.38E-69 | 0.389338 | 0.112 | 0.007 | 1.76E-64 | Erythrocyt | SLC14A1  |
| 7385 | BLVRB.3   | 3.55E-65 | 1.863608 | 0.51  | 0.135 | 6.67E-61 | Erythrocyt | BLVRB    |
| 7386 | GYPC.4    | 3.99E-62 | 1.652579 | 0.932 | 0.672 | 7.50E-58 | Erythrocyt | GYPC     |
| 7387 | TMEM86B   | 1.42E-56 | 0.346017 | 0.102 | 0.007 | 2.66E-52 | Erythrocyt | TMEM86B  |
| 7388 | HLA-C.4   | 2.78E-52 | -1.31575 | 0.65  | 0.985 | 5.23E-48 | Erythrocyt | HLA-C    |
| 7389 | BNIP3L.1  | 3.36E-50 | 2.152844 | 0.66  | 0.31  | 6.31E-46 | Erythrocyt | BNIP3L   |
| 7390 | YBX3.2    | 5.70E-50 | 1.237789 | 0.398 | 0.1   | 1.07E-45 | Erythrocyt | YBX3     |
| 7391 | HLA-B.3   | 1.81E-48 | -1.16734 | 0.689 | 0.994 | 3.40E-44 | Erythrocyt | HLA-B    |
| 7392 | PFN1.5    | 7.61E-48 | -1.17237 | 0.66  | 0.985 | 1.43E-43 | Erythrocyt | PFN1     |
| 7393 | ACTB.4    | 7.36E-46 | -1.16546 | 0.971 | 0.999 | 1.38E-41 | Erythrocyt | ACTB     |
| 7394 | TSPAN5    | 8.87E-46 | 0.586055 | 0.214 | 0.034 | 1.67E-41 | Erythrocyt | TSPAN5   |
| 7395 | FKBP8.1   | 1.77E-45 | 1.418235 | 0.757 | 0.455 | 3.33E-41 | Erythrocyt | FKBP8    |
| 7396 | GUK1.2    | 4.55E-45 | 1.505501 | 0.84  | 0.605 | 8.54E-41 | Erythrocyt | GUK1     |
| 7397 | ACTG1.2   | 7.23E-45 | -1.29396 | 0.631 | 0.954 | 1.36E-40 | Erythrocyt | ACTG1    |
| 7398 | ARPC3.3   | 1.89E-44 | -1.16479 | 0.519 | 0.908 | 3.54E-40 | Erythrocyt | ARPC3    |
| 7399 | CORO1A.2  | 2.56E-44 | -1.12821 | 0.515 | 0.924 | 4.82E-40 | Erythrocyt | CORO1A   |
| 7400 | H3F3A.2   | 3.37E-43 | -1.13666 | 0.641 | 0.951 | 6.33E-39 | Erythrocyt | H3F3A    |
| 7401 | FBXO7.2   | 4.68E-43 | 1.660921 | 0.587 | 0.257 | 8.79E-39 | Erythrocyt | FBXO7    |
| 7402 | CFL1.5    | 1.01E-42 | -1.11862 | 0.626 | 0.954 | 1.90E-38 | Erythrocyt | CFL1     |
| 7403 | B2M.5     | 4.50E-42 | -0.96958 | 0.888 | 1     | 8.46E-38 | Erythrocyt | B2M      |
| 7404 | MXI1      | 5.05E-41 | 0.621781 | 0.199 | 0.032 | 9.49E-37 | Erythrocyt | MXI1     |
| 7405 | ARHGDI.2  | 5.07E-41 | -0.99577 | 0.602 | 0.963 | 9.52E-37 | Erythrocyt | ARHGDI   |
| 7406 | ARPC2.5   | 2.69E-39 | -1.14239 | 0.485 | 0.861 | 5.05E-35 | Erythrocyt | ARPC2    |
| 7407 | MT-CO1.2  | 3.43E-39 | -0.95135 | 0.845 | 0.997 | 6.45E-35 | Erythrocyt | MT-CO1   |
| 7408 | PABPC1.3  | 6.51E-39 | -1.03509 | 0.68  | 0.943 | 1.22E-34 | Erythrocyt | PABPC1   |
| 7409 | RHOA.3    | 2.28E-37 | -1.07491 | 0.5   | 0.875 | 4.27E-33 | Erythrocyt | RHOA     |
| 7410 | RPL7A.3   | 1.10E-36 | -0.82742 | 0.801 | 0.992 | 2.07E-32 | Erythrocyt | RPL7A    |
| 7411 | HNRNPA1.1 | 1.86E-36 | -1.00632 | 0.549 | 0.927 | 3.50E-32 | Erythrocyt | HNRNPA1  |
| 7412 | RAC2.4    | 2.41E-36 | -1.03065 | 0.558 | 0.909 | 4.53E-32 | Erythrocyt | RAC2     |
| 7413 | HLA-E.4   | 7.26E-36 | -0.96871 | 0.568 | 0.958 | 1.36E-31 | Erythrocyt | HLA-E    |
| 7414 | RACK1.4   | 9.16E-36 | -0.85252 | 0.718 | 0.987 | 1.72E-31 | Erythrocyt | RACK1    |
| 7415 | LSP1.3    | 9.27E-36 | -1.14958 | 0.422 | 0.819 | 1.74E-31 | Erythrocyt | LSP1     |
| 7416 | FECH      | 1.03E-35 | 0.676201 | 0.18  | 0.03  | 1.94E-31 | Erythrocyt | FECH     |
| 7417 | PTPRC.3   | 6.44E-35 | -1.09461 | 0.456 | 0.856 | 1.21E-30 | Erythrocyt | PTPRC    |
| 7418 | RPS7.3    | 1.64E-34 | -0.79019 | 0.806 | 0.994 | 3.07E-30 | Erythrocyt | RPS7     |
| 7419 | EEF1A1.3  | 1.98E-34 | -0.8561  | 0.922 | 0.997 | 3.71E-30 | Erythrocyt | EEF1A1   |
| 7420 | MTRNR2L1  | 2.43E-34 | -1.12023 | 0.782 | 0.945 | 4.56E-30 | Erythrocyt | MTRNR2L1 |
| 7421 | NACA.4    | 3.39E-34 | -0.78258 | 0.893 | 0.991 | 6.37E-30 | Erythrocyt | NACA     |
| 7422 | MKRN1.1   | 4.00E-34 | 1.317821 | 0.515 | 0.22  | 7.51E-30 | Erythrocyt | MKRN1    |
| 7423 | RPL3.3    | 4.60E-34 | -0.84636 | 0.718 | 0.987 | 8.65E-30 | Erythrocyt | RPL3     |
| 7424 | MT-CO2.1  | 4.83E-34 | -0.81071 | 0.752 | 0.999 | 9.07E-30 | Erythrocyt | MT-CO2   |
| 7425 | LAPTM5.3  | 8.75E-34 | -0.94915 | 0.456 | 0.872 | 1.64E-29 | Erythrocyt | LAPTM5   |
| 7426 | HSPA8.4   | 9.25E-34 | -1.0649  | 0.471 | 0.867 | 1.74E-29 | Erythrocyt | HSPA8    |
| 7427 | H3F3B.2   | 9.93E-34 | -0.96879 | 0.597 | 0.952 | 1.87E-29 | Erythrocyt | H3F3B    |

|      |           |          |          |       |       |          |            |           |
|------|-----------|----------|----------|-------|-------|----------|------------|-----------|
| 7428 | YWHAZ.4   | 1.00E-33 | -1.0695  | 0.437 | 0.806 | 1.89E-29 | Erythrocyt | YWHAZ     |
| 7429 | LGALS3.3  | 1.35E-33 | 1.159709 | 0.383 | 0.118 | 2.54E-29 | Erythrocyt | LGALS3    |
| 7430 | VIM.4     | 2.16E-33 | -1.47609 | 0.49  | 0.815 | 4.06E-29 | Erythrocyt | VIM       |
| 7431 | GAPDH.4   | 2.29E-33 | -1.30425 | 0.612 | 0.903 | 4.31E-29 | Erythrocyt | GAPDH     |
| 7432 | COX4I1.1  | 3.09E-33 | -0.83269 | 0.597 | 0.961 | 5.80E-29 | Erythrocyt | COX4I1    |
| 7433 | RPL29.4   | 3.87E-33 | -0.79118 | 0.801 | 0.994 | 7.28E-29 | Erythrocyt | RPL29     |
| 7434 | CALM1.5   | 8.39E-33 | -1.03182 | 0.481 | 0.881 | 1.58E-28 | Erythrocyt | CALM1     |
| 7435 | PPIA.2    | 1.43E-32 | -0.84958 | 0.602 | 0.951 | 2.69E-28 | Erythrocyt | PPIA      |
| 7436 | EEF2.4    | 1.88E-32 | -0.86823 | 0.67  | 0.936 | 3.54E-28 | Erythrocyt | EEF2      |
| 7437 | HNRNPA2B1 | 2.56E-32 | -0.95906 | 0.524 | 0.884 | 4.82E-28 | Erythrocyt | HNRNPA2B1 |
| 7438 | ANK1      | 4.23E-32 | 0.319398 | 0.121 | 0.016 | 7.95E-28 | Erythrocyt | ANK1      |
| 7439 | ITGB2.5   | 2.06E-31 | -1.51036 | 0.252 | 0.649 | 3.88E-27 | Erythrocyt | ITGB2     |
| 7440 | UBC.3     | 2.65E-31 | -0.99456 | 0.466 | 0.853 | 4.97E-27 | Erythrocyt | UBC       |
| 7441 | TMSB4X.4  | 4.23E-31 | -0.8113  | 0.767 | 1     | 7.95E-27 | Erythrocyt | TMSB4X    |
| 7442 | MALAT1.3  | 5.82E-31 | -0.90933 | 0.689 | 0.998 | 1.09E-26 | Erythrocyt | MALAT1    |
| 7443 | FXYS.1    | 1.35E-30 | -0.94573 | 0.481 | 0.876 | 2.54E-26 | Erythrocyt | FXYS      |
| 7444 | RPL8.4    | 4.79E-30 | -0.75921 | 0.854 | 0.993 | 8.99E-26 | Erythrocyt | RPL8      |
| 7445 | RPS3.3    | 7.04E-30 | -0.76227 | 0.786 | 0.994 | 1.32E-25 | Erythrocyt | RPS3      |
| 7446 | RPS26.3   | 1.02E-29 | -1.33665 | 0.646 | 0.949 | 1.91E-25 | Erythrocyt | RPS26     |
| 7447 | MT-CYB.1  | 1.48E-29 | -0.85664 | 0.67  | 0.952 | 2.77E-25 | Erythrocyt | MT-CYB    |
| 7448 | CLIC1.4   | 2.18E-29 | -1.39833 | 0.359 | 0.699 | 4.09E-25 | Erythrocyt | CLIC1     |
| 7449 | RNF10     | 5.49E-29 | 1.307416 | 0.495 | 0.226 | 1.03E-24 | Erythrocyt | RNF10     |
| 7450 | NFE2.2    | 6.63E-29 | 0.538783 | 0.248 | 0.06  | 1.25E-24 | Erythrocyt | NFE2      |
| 7451 | MT-ATP6.3 | 8.72E-29 | -0.79262 | 0.748 | 0.994 | 1.64E-24 | Erythrocyt | MT-ATP6   |
| 7452 | PTMA.2    | 9.46E-29 | -0.74766 | 0.699 | 0.99  | 1.78E-24 | Erythrocyt | PTMA      |
| 7453 | CHCHD2.1  | 1.04E-28 | -0.9039  | 0.461 | 0.807 | 1.96E-24 | Erythrocyt | CHCHD2    |
| 7454 | YWHAZ.5   | 1.32E-28 | -0.92302 | 0.442 | 0.81  | 2.49E-24 | Erythrocyt | YWHAZ     |
| 7455 | RPS9.3    | 1.37E-28 | -0.73015 | 0.738 | 0.993 | 2.57E-24 | Erythrocyt | RPS9      |
| 7456 | RPL27.2   | 1.44E-28 | -0.73519 | 0.602 | 0.954 | 2.71E-24 | Erythrocyt | RPL27     |
| 7457 | RPL6.2    | 1.59E-28 | -0.73821 | 0.748 | 0.992 | 2.99E-24 | Erythrocyt | RPL6      |
| 7458 | SH3BGR1.3 | 4.81E-28 | -1.12819 | 0.767 | 0.941 | 9.04E-24 | Erythrocyt | SH3BGR1   |
| 7459 | CNBP.2    | 9.14E-28 | -0.87862 | 0.476 | 0.809 | 1.72E-23 | Erythrocyt | CNBP      |
| 7460 | MYL12B.3  | 9.57E-28 | -0.91006 | 0.447 | 0.797 | 1.80E-23 | Erythrocyt | MYL12B    |
| 7461 | SRSF5.2   | 2.86E-27 | -0.93815 | 0.379 | 0.757 | 5.38E-23 | Erythrocyt | SRSF5     |
| 7462 | BTG1.4    | 3.12E-27 | -0.90015 | 0.5   | 0.883 | 5.85E-23 | Erythrocyt | BTG1      |
| 7463 | EVL.4     | 3.65E-27 | -1.0599  | 0.383 | 0.741 | 6.85E-23 | Erythrocyt | EVL       |
| 7464 | PSME1.1   | 4.86E-27 | -0.84675 | 0.539 | 0.861 | 9.13E-23 | Erythrocyt | PSME1     |
| 7465 | RNF11     | 7.48E-27 | 0.603613 | 0.282 | 0.08  | 1.40E-22 | Erythrocyt | RNF11     |
| 7466 | RPL19.2   | 9.96E-27 | -0.71701 | 0.83  | 0.996 | 1.87E-22 | Erythrocyt | RPL19     |
| 7467 | RPLP0.2   | 1.52E-26 | -0.74969 | 0.738 | 0.987 | 2.86E-22 | Erythrocyt | RPLP0     |
| 7468 | ITM2B.4   | 1.58E-26 | -0.86401 | 0.612 | 0.886 | 2.96E-22 | Erythrocyt | ITM2B     |
| 7469 | EIF3K.1   | 2.49E-26 | -0.76943 | 0.578 | 0.878 | 4.68E-22 | Erythrocyt | EIF3K     |
| 7470 | MT-ND1.4  | 3.20E-26 | -0.87111 | 0.524 | 0.862 | 6.01E-22 | Erythrocyt | MT-ND1    |
| 7471 | GPSM3.2   | 3.34E-26 | -0.82812 | 0.437 | 0.804 | 6.27E-22 | Erythrocyt | GPSM3     |
| 7472 | EEF1B2.4  | 5.90E-26 | -0.76522 | 0.675 | 0.969 | 1.11E-21 | Erythrocyt | EEF1B2    |
| 7473 | PPIB.3    | 6.32E-26 | -0.97808 | 0.432 | 0.792 | 1.19E-21 | Erythrocyt | PPIB      |
| 7474 | RPS3A.4   | 6.74E-26 | -0.72486 | 0.801 | 0.992 | 1.27E-21 | Erythrocyt | RPS3A     |

|      |            |          |          |       |       |          |            |          |
|------|------------|----------|----------|-------|-------|----------|------------|----------|
| 7475 | IFITM2.5   | 8.48E-26 | -1.3763  | 0.519 | 0.827 | 1.59E-21 | Erythrocyt | IFITM2   |
| 7476 | LIMD2.4    | 9.98E-26 | -0.8002  | 0.573 | 0.93  | 1.87E-21 | Erythrocyt | LIMD2    |
| 7477 | TPM3.3     | 1.17E-25 | -0.95724 | 0.379 | 0.73  | 2.20E-21 | Erythrocyt | TPM3     |
| 7478 | MT-CO3.1   | 1.23E-25 | -0.74716 | 0.65  | 0.953 | 2.31E-21 | Erythrocyt | MT-CO3   |
| 7479 | TMSB10.3   | 1.46E-25 | -0.72569 | 0.709 | 0.998 | 2.74E-21 | Erythrocyt | TMSB10   |
| 7480 | SLC38A5.1  | 1.64E-25 | 0.566741 | 0.209 | 0.051 | 3.07E-21 | Erythrocyt | SLC38A5  |
| 7481 | ZFP36.2    | 2.41E-25 | -1.38411 | 0.214 | 0.576 | 4.53E-21 | Erythrocyt | ZFP36    |
| 7482 | SLC25A3.2  | 3.70E-25 | -0.87541 | 0.383 | 0.723 | 6.95E-21 | Erythrocyt | SLC25A3  |
| 7483 | SUB1.1     | 3.80E-25 | -0.85958 | 0.398 | 0.772 | 7.14E-21 | Erythrocyt | SUB1     |
| 7484 | RPL5.4     | 4.54E-25 | -0.70993 | 0.68  | 0.986 | 8.52E-21 | Erythrocyt | RPL5     |
| 7485 | Mar-08     | 4.59E-25 | 0.429933 | 0.15  | 0.029 | 8.62E-21 | Erythrocyt | Mar-08   |
| 7486 | NPRL3      | 6.05E-25 | 0.709945 | 0.335 | 0.112 | 1.14E-20 | Erythrocyt | NPRL3    |
| 7487 | RIOK3.1    | 9.41E-25 | 1.236367 | 0.422 | 0.185 | 1.77E-20 | Erythrocyt | RIOK3    |
| 7488 | CAPZB.3    | 9.56E-25 | -0.87298 | 0.398 | 0.738 | 1.80E-20 | Erythrocyt | CAPZB    |
| 7489 | CD37.4     | 1.80E-24 | -1.01373 | 0.529 | 0.893 | 3.38E-20 | Erythrocyt | CD37     |
| 7490 | WAS.2      | 2.02E-24 | -1.05963 | 0.121 | 0.495 | 3.79E-20 | Erythrocyt | WAS      |
| 7491 | MT-ND4L.3  | 2.15E-24 | -0.75991 | 0.636 | 0.954 | 4.03E-20 | Erythrocyt | MT-ND4L  |
| 7492 | TAGLN2.4   | 2.93E-24 | -1.02051 | 0.413 | 0.774 | 5.50E-20 | Erythrocyt | TAGLN2   |
| 7493 | CALM2.3    | 3.19E-24 | -0.81489 | 0.476 | 0.809 | 5.99E-20 | Erythrocyt | CALM2    |
| 7494 | RPS18.4    | 4.54E-24 | -0.69717 | 0.796 | 0.992 | 8.54E-20 | Erythrocyt | RPS18    |
| 7495 | RPL26.3    | 6.31E-24 | -0.65288 | 0.718 | 0.99  | 1.19E-19 | Erythrocyt | RPL26    |
| 7496 | RAN.2      | 7.66E-24 | -0.85208 | 0.34  | 0.737 | 1.44E-19 | Erythrocyt | RAN      |
| 7497 | TMBIM6.3   | 9.10E-24 | -0.89701 | 0.359 | 0.696 | 1.71E-19 | Erythrocyt | TMBIM6   |
| 7498 | LCP1.3     | 9.17E-24 | -1.13163 | 0.243 | 0.586 | 1.72E-19 | Erythrocyt | LCP1     |
| 7499 | HLA-A.4    | 1.49E-23 | -0.78629 | 0.602 | 0.904 | 2.80E-19 | Erythrocyt | HLA-A    |
| 7500 | UBB.4      | 1.65E-23 | 1.988534 | 0.845 | 0.805 | 3.09E-19 | Erythrocyt | UBB      |
| 7501 | TUBB.3     | 1.82E-23 | -1.06578 | 0.238 | 0.583 | 3.42E-19 | Erythrocyt | TUBB     |
| 7502 | RPL12.4    | 2.70E-23 | -0.66209 | 0.825 | 0.993 | 5.07E-19 | Erythrocyt | RPL12    |
| 7503 | RPS23.5    | 2.85E-23 | -0.65078 | 0.757 | 0.994 | 5.36E-19 | Erythrocyt | RPS23    |
| 7504 | GPR146.1   | 5.67E-23 | 0.376026 | 0.146 | 0.029 | 1.06E-18 | Erythrocyt | GPR146   |
| 7505 | COTL1.3    | 6.88E-23 | -1.46546 | 0.257 | 0.592 | 1.29E-18 | Erythrocyt | COTL1    |
| 7506 | ATP5MC2.3  | 7.68E-23 | -0.65633 | 0.597 | 0.946 | 1.44E-18 | Erythrocyt | ATP5MC2  |
| 7507 | HNRNPDL.3  | 1.00E-22 | -0.76923 | 0.456 | 0.826 | 1.88E-18 | Erythrocyt | HNRNPDL  |
| 7508 | TBC1D10C.3 | 1.07E-22 | -0.9088  | 0.296 | 0.664 | 2.02E-18 | Erythrocyt | TBC1D10C |
| 7509 | MYL12A.4   | 1.36E-22 | -0.71429 | 0.655 | 0.947 | 2.55E-18 | Erythrocyt | MYL12A   |
| 7510 | HNRNPK.2   | 1.40E-22 | -0.84284 | 0.408 | 0.746 | 2.63E-18 | Erythrocyt | HNRNPK   |
| 7511 | RPL28.2    | 2.05E-22 | -0.63074 | 0.879 | 0.998 | 3.86E-18 | Erythrocyt | RPL28    |
| 7512 | RPS13.3    | 2.20E-22 | -0.64866 | 0.806 | 0.994 | 4.13E-18 | Erythrocyt | RPS13    |
| 7513 | RPS5.5     | 2.64E-22 | -0.65284 | 0.762 | 0.985 | 4.96E-18 | Erythrocyt | RPS5     |
| 7514 | ACTR3.2    | 2.96E-22 | -0.92475 | 0.335 | 0.665 | 5.56E-18 | Erythrocyt | ACTR3    |
| 7515 | SLC25A5.1  | 3.01E-22 | -0.88377 | 0.374 | 0.703 | 5.65E-18 | Erythrocyt | SLC25A5  |
| 7516 | NPM1.4     | 3.08E-22 | -0.75815 | 0.578 | 0.912 | 5.79E-18 | Erythrocyt | NPM1     |
| 7517 | UBXN1.1    | 3.26E-22 | -0.82503 | 0.393 | 0.72  | 6.13E-18 | Erythrocyt | UBXN1    |
| 7518 | DBI.2      | 4.66E-22 | -0.91065 | 0.252 | 0.601 | 8.75E-18 | Erythrocyt | DBI      |
| 7519 | SARAF.5    | 5.52E-22 | -0.79734 | 0.602 | 0.888 | 1.04E-17 | Erythrocyt | SARAF    |
| 7520 | NCOA4.3    | 6.29E-22 | 1.668255 | 0.49  | 0.261 | 1.18E-17 | Erythrocyt | NCOA4    |
| 7521 | DDX5.3     | 6.67E-22 | -0.77511 | 0.529 | 0.848 | 1.25E-17 | Erythrocyt | DDX5     |

|      |           |          |          |       |       |          |            |         |
|------|-----------|----------|----------|-------|-------|----------|------------|---------|
| 7522 | RPL18.3   | 1.18E-21 | -0.65214 | 0.738 | 0.992 | 2.23E-17 | Erythrocyt | RPL18   |
| 7523 | GLRX5.1   | 1.24E-21 | 0.747796 | 0.262 | 0.082 | 2.33E-17 | Erythrocyt | GLRX5   |
| 7524 | HNRNPF.3  | 1.24E-21 | -0.80101 | 0.359 | 0.695 | 2.34E-17 | Erythrocyt | HNRNPF  |
| 7525 | RPS6.4    | 1.34E-21 | -0.62823 | 0.733 | 0.99  | 2.52E-17 | Erythrocyt | RPS6    |
| 7526 | ARL6IP5.2 | 1.64E-21 | -0.8532  | 0.286 | 0.646 | 3.07E-17 | Erythrocyt | ARL6IP5 |
| 7527 | S100A6.4  | 1.95E-21 | -1.64808 | 0.456 | 0.753 | 3.66E-17 | Erythrocyt | S100A6  |
| 7528 | HCLS1.3   | 2.16E-21 | -0.85472 | 0.325 | 0.667 | 4.06E-17 | Erythrocyt | HCLS1   |
| 7529 | DAZAP2.2  | 2.23E-21 | -0.77762 | 0.422 | 0.748 | 4.18E-17 | Erythrocyt | DAZAP2  |
| 7530 | PSMA7.1   | 2.41E-21 | -0.82111 | 0.359 | 0.686 | 4.54E-17 | Erythrocyt | PSMA7   |
| 7531 | SERP1.3   | 2.98E-21 | -0.73169 | 0.427 | 0.777 | 5.61E-17 | Erythrocyt | SERP1   |
| 7532 | SF3B2     | 3.62E-21 | -0.88819 | 0.209 | 0.538 | 6.79E-17 | Erythrocyt | SF3B2   |
| 7533 | CD74.5    | 3.62E-21 | -1.19887 | 0.495 | 0.812 | 6.80E-17 | Erythrocyt | CD74    |
| 7534 | RPL15.3   | 4.58E-21 | -0.61245 | 0.694 | 0.983 | 8.61E-17 | Erythrocyt | RPL15   |
| 7535 | SSR2.2    | 4.67E-21 | -0.75979 | 0.393 | 0.743 | 8.76E-17 | Erythrocyt | SSR2    |
| 7536 | CYBA.5    | 5.20E-21 | -0.92666 | 0.403 | 0.733 | 9.77E-17 | Erythrocyt | CYBA    |
| 7537 | PCBP1.4   | 5.27E-21 | -0.69286 | 0.728 | 0.875 | 9.89E-17 | Erythrocyt | PCBP1   |
| 7538 | S100A10.3 | 6.25E-21 | -1.4139  | 0.311 | 0.622 | 1.17E-16 | Erythrocyt | S100A10 |
| 7539 | RPL4.2    | 7.58E-21 | -0.69229 | 0.549 | 0.908 | 1.42E-16 | Erythrocyt | RPL4    |
| 7540 | PGK1.2    | 8.09E-21 | -0.76133 | 0.345 | 0.692 | 1.52E-16 | Erythrocyt | PGK1    |
| 7541 | SLC40A1.1 | 8.14E-21 | 0.570555 | 0.233 | 0.068 | 1.53E-16 | Erythrocyt | SLC40A1 |
| 7542 | RPL10.3   | 8.51E-21 | -0.64559 | 0.791 | 0.996 | 1.60E-16 | Erythrocyt | RPL10   |
| 7543 | RPL30.3   | 8.64E-21 | -0.61258 | 0.917 | 0.998 | 1.62E-16 | Erythrocyt | RPL30   |
| 7544 | PSMB8.1   | 1.12E-20 | -0.78581 | 0.325 | 0.673 | 2.11E-16 | Erythrocyt | PSMB8   |
| 7545 | TXNIP.3   | 1.16E-20 | -0.84729 | 0.432 | 0.772 | 2.18E-16 | Erythrocyt | TXNIP   |
| 7546 | JAK1.4    | 1.37E-20 | -0.81448 | 0.311 | 0.642 | 2.57E-16 | Erythrocyt | JAK1    |
| 7547 | RPS19.2   | 1.41E-20 | -0.62058 | 0.767 | 0.994 | 2.64E-16 | Erythrocyt | RPS19   |
| 7548 | RPL13.3   | 1.50E-20 | -0.61148 | 0.859 | 0.993 | 2.81E-16 | Erythrocyt | RPL13   |
| 7549 | RBM3      | 1.55E-20 | -0.8864  | 0.238 | 0.584 | 2.92E-16 | Erythrocyt | RBM3    |
| 7550 | SRSF3.1   | 1.61E-20 | -0.94954 | 0.17  | 0.506 | 3.03E-16 | Erythrocyt | SRSF3   |
| 7551 | HMGN2.2   | 1.75E-20 | -0.80268 | 0.403 | 0.753 | 3.28E-16 | Erythrocyt | HMGN2   |
| 7552 | CAP1.5    | 3.26E-20 | -0.88593 | 0.252 | 0.583 | 6.13E-16 | Erythrocyt | CAP1    |
| 7553 | PRR13.2   | 4.91E-20 | -0.79638 | 0.33  | 0.658 | 9.22E-16 | Erythrocyt | PRR13   |
| 7554 | PSME2.3   | 4.99E-20 | -0.87878 | 0.311 | 0.652 | 9.38E-16 | Erythrocyt | PSME2   |
| 7555 | EMP3.5    | 6.31E-20 | -0.89531 | 0.485 | 0.79  | 1.19E-15 | Erythrocyt | EMP3    |
| 7556 | SUMO2.2   | 7.33E-20 | -0.67778 | 0.505 | 0.847 | 1.38E-15 | Erythrocyt | SUMO2   |
| 7557 | FAU.3     | 8.74E-20 | -0.5948  | 0.84  | 0.998 | 1.64E-15 | Erythrocyt | FAU     |
| 7558 | SRP14.2   | 1.38E-19 | -0.59821 | 0.597 | 0.882 | 2.59E-15 | Erythrocyt | SRP14   |
| 7559 | UBE2I     | 1.42E-19 | -0.80049 | 0.248 | 0.571 | 2.67E-15 | Erythrocyt | UBE2I   |
| 7560 | EIF3F.2   | 1.56E-19 | -0.6962  | 0.432 | 0.786 | 2.93E-15 | Erythrocyt | EIF3F   |
| 7561 | MT-ND2.4  | 1.56E-19 | -0.72773 | 0.558 | 0.851 | 2.94E-15 | Erythrocyt | MT-ND2  |
| 7562 | SLC25A6.1 | 1.74E-19 | -0.73324 | 0.461 | 0.799 | 3.28E-15 | Erythrocyt | SLC25A6 |
| 7563 | RPL14.4   | 2.49E-19 | -0.62888 | 0.738 | 0.99  | 4.67E-15 | Erythrocyt | RPL14   |
| 7564 | FCMR.5    | 2.73E-19 | -1.01427 | 0.267 | 0.578 | 5.13E-15 | Erythrocyt | FCMR    |
| 7565 | PSMB10.2  | 2.86E-19 | -0.8117  | 0.248 | 0.59  | 5.37E-15 | Erythrocyt | PSMB10  |
| 7566 | PRELID1.3 | 3.08E-19 | -0.95823 | 0.209 | 0.513 | 5.79E-15 | Erythrocyt | PRELID1 |
| 7567 | EIF3H.2   | 4.56E-19 | -0.71191 | 0.437 | 0.755 | 8.57E-15 | Erythrocyt | EIF3H   |
| 7568 | EEF1D.3   | 5.00E-19 | -0.59007 | 0.694 | 0.986 | 9.39E-15 | Erythrocyt | EEF1D   |

|      |           |          |          |       |       |          |            |          |
|------|-----------|----------|----------|-------|-------|----------|------------|----------|
| 7569 | ARPC5.3   | 5.60E-19 | -0.82629 | 0.286 | 0.625 | 1.05E-14 | Erythrocyt | ARPC5    |
| 7570 | RPS4Y1.1  | 5.63E-19 | -1.56248 | 0.141 | 0.45  | 1.06E-14 | Erythrocyt | RPS4Y1   |
| 7571 | SHISA5.1  | 5.84E-19 | -0.89694 | 0.146 | 0.449 | 1.10E-14 | Erythrocyt | SHISA5   |
| 7572 | ZFP36L1.3 | 6.55E-19 | -0.97161 | 0.223 | 0.54  | 1.23E-14 | Erythrocyt | ZFP36L1  |
| 7573 | COX5B.1   | 7.16E-19 | -0.68276 | 0.461 | 0.758 | 1.35E-14 | Erythrocyt | COX5B    |
| 7574 | PKM.2     | 7.28E-19 | -0.86092 | 0.291 | 0.614 | 1.37E-14 | Erythrocyt | PKM      |
| 7575 | HCST.4    | 7.50E-19 | -1.00785 | 0.306 | 0.629 | 1.41E-14 | Erythrocyt | HCST     |
| 7576 | SSR4.2    | 8.81E-19 | -0.75316 | 0.359 | 0.686 | 1.66E-14 | Erythrocyt | SSR4     |
| 7577 | RPS14.4   | 1.25E-18 | -0.59097 | 0.85  | 0.992 | 2.35E-14 | Erythrocyt | RPS14    |
| 7578 | TPI1.4    | 1.31E-18 | -0.88523 | 0.311 | 0.622 | 2.46E-14 | Erythrocyt | TPI1     |
| 7579 | RPL35.3   | 1.44E-18 | -0.5975  | 0.66  | 0.984 | 2.70E-14 | Erythrocyt | RPL35    |
| 7580 | RPS10.2   | 1.47E-18 | -0.76641 | 0.345 | 0.67  | 2.76E-14 | Erythrocyt | RPS10    |
| 7581 | RPL11.3   | 1.68E-18 | -0.58462 | 0.854 | 0.995 | 3.16E-14 | Erythrocyt | RPL11    |
| 7582 | LY6E.2    | 1.71E-18 | -0.82252 | 0.301 | 0.636 | 3.20E-14 | Erythrocyt | LY6E     |
| 7583 | HAGH      | 1.96E-18 | 0.749622 | 0.359 | 0.156 | 3.69E-14 | Erythrocyt | HAGH     |
| 7584 | EIF3G.3   | 2.06E-18 | -0.70827 | 0.427 | 0.766 | 3.88E-14 | Erythrocyt | EIF3G    |
| 7585 | SEPT9.3   | 2.08E-18 | -0.83085 | 0.272 | 0.585 | 3.91E-14 | Erythrocyt | Sep-09   |
| 7586 | RAB2B     | 2.19E-18 | 0.385724 | 0.136 | 0.03  | 4.12E-14 | Erythrocyt | RAB2B    |
| 7587 | TKT.3     | 2.24E-18 | -1.07134 | 0.218 | 0.51  | 4.21E-14 | Erythrocyt | TKT      |
| 7588 | CD53.3    | 2.73E-18 | -0.77613 | 0.267 | 0.595 | 5.13E-14 | Erythrocyt | CD53     |
| 7589 | EIF3D.3   | 2.91E-18 | -0.77936 | 0.238 | 0.561 | 5.47E-14 | Erythrocyt | EIF3D    |
| 7590 | RPL24.3   | 3.03E-18 | -0.57091 | 0.752 | 0.986 | 5.69E-14 | Erythrocyt | RPL24    |
| 7591 | RPL18A.4  | 3.40E-18 | -0.58497 | 0.835 | 0.992 | 6.38E-14 | Erythrocyt | RPL18A   |
| 7592 | ERP29.1   | 3.42E-18 | -0.65262 | 0.369 | 0.722 | 6.43E-14 | Erythrocyt | ERP29    |
| 7593 | SRP9.2    | 3.49E-18 | -0.76123 | 0.262 | 0.591 | 6.56E-14 | Erythrocyt | SRP9     |
| 7594 | SPCS1.2   | 3.59E-18 | -0.72065 | 0.311 | 0.647 | 6.74E-14 | Erythrocyt | SPCS1    |
| 7595 | ATP5PB    | 3.62E-18 | -0.75534 | 0.267 | 0.594 | 6.81E-14 | Erythrocyt | ATP5PB   |
| 7596 | SEPT7.3   | 4.00E-18 | -0.78727 | 0.325 | 0.654 | 7.51E-14 | Erythrocyt | Sep-07   |
| 7597 | NCL.1     | 4.00E-18 | -0.69395 | 0.427 | 0.73  | 7.52E-14 | Erythrocyt | NCL      |
| 7598 | RPL23A.2  | 4.46E-18 | -0.58773 | 0.689 | 0.964 | 8.38E-14 | Erythrocyt | RPL23A   |
| 7599 | XRCC6.1   | 4.92E-18 | -0.72102 | 0.291 | 0.6   | 9.24E-14 | Erythrocyt | XRCC6    |
| 7600 | ENO1.3    | 5.02E-18 | -0.77863 | 0.354 | 0.646 | 9.42E-14 | Erythrocyt | ENO1     |
| 7601 | EIF4B.2   | 5.07E-18 | -0.8232  | 0.267 | 0.578 | 9.52E-14 | Erythrocyt | EIF4B    |
| 7602 | ZFP36L2.4 | 5.86E-18 | -0.83257 | 0.316 | 0.631 | 1.10E-13 | Erythrocyt | ZFP36L2  |
| 7603 | PPP1CA.2  | 6.37E-18 | -0.71795 | 0.325 | 0.662 | 1.20E-13 | Erythrocyt | PPP1CA   |
| 7604 | CIRBP.3   | 7.08E-18 | -0.69587 | 0.451 | 0.767 | 1.33E-13 | Erythrocyt | CIRBP    |
| 7605 | RPS4X.4   | 8.55E-18 | -0.58885 | 0.806 | 0.991 | 1.61E-13 | Erythrocyt | RPS4X    |
| 7606 | PFDN5.1   | 8.98E-18 | -0.51011 | 0.786 | 0.98  | 1.69E-13 | Erythrocyt | PFDN5    |
| 7607 | SON.1     | 1.05E-17 | -0.75249 | 0.33  | 0.646 | 1.98E-13 | Erythrocyt | SON      |
| 7608 | ATP5MG.3  | 1.20E-17 | -0.55081 | 0.694 | 0.921 | 2.26E-13 | Erythrocyt | ATP5MG   |
| 7609 | PSMB9.2   | 1.25E-17 | -0.75066 | 0.345 | 0.682 | 2.35E-13 | Erythrocyt | PSMB9    |
| 7610 | MT-ND4.3  | 1.33E-17 | -0.54958 | 0.694 | 0.958 | 2.50E-13 | Erythrocyt | MT-ND4   |
| 7611 | ATP5F1D.1 | 1.41E-17 | -0.59219 | 0.398 | 0.726 | 2.66E-13 | Erythrocyt | ATP5F1D  |
| 7612 | RPL9.3    | 1.51E-17 | -0.57542 | 0.694 | 0.986 | 2.84E-13 | Erythrocyt | RPL9     |
| 7613 | ALDOA.3   | 1.61E-17 | -0.86916 | 0.34  | 0.643 | 3.02E-13 | Erythrocyt | ALDOA    |
| 7614 | ARHGDI.1  | 1.83E-17 | -0.81851 | 0.18  | 0.481 | 3.44E-13 | Erythrocyt | ARHGDI.1 |
| 7615 | MSN.2     | 2.16E-17 | -0.86688 | 0.175 | 0.482 | 4.06E-13 | Erythrocyt | MSN      |

|      |           |          |          |       |       |          |            |         |
|------|-----------|----------|----------|-------|-------|----------|------------|---------|
| 7616 | UBE2D2.2  | 2.34E-17 | -0.66882 | 0.432 | 0.724 | 4.40E-13 | Erythrocyt | UBE2D2  |
| 7617 | RPSA.2    | 2.41E-17 | -0.57944 | 0.631 | 0.941 | 4.53E-13 | Erythrocyt | RPSA    |
| 7618 | RAP1B.3   | 2.49E-17 | -0.83644 | 0.32  | 0.626 | 4.68E-13 | Erythrocyt | RAP1B   |
| 7619 | OSTF1.3   | 2.57E-17 | -0.86105 | 0.16  | 0.459 | 4.82E-13 | Erythrocyt | OSTF1   |
| 7620 | SELL.4    | 3.59E-17 | -0.74857 | 0.451 | 0.76  | 6.74E-13 | Erythrocyt | SELL    |
| 7621 | EIF3L.3   | 3.63E-17 | -0.67212 | 0.383 | 0.694 | 6.82E-13 | Erythrocyt | EIF3L   |
| 7622 | GNG5.2    | 4.18E-17 | -0.74573 | 0.354 | 0.635 | 7.84E-13 | Erythrocyt | GNG5    |
| 7623 | APBB1IP.2 | 4.45E-17 | -0.8347  | 0.165 | 0.456 | 8.37E-13 | Erythrocyt | APBB1IP |
| 7624 | TMA7.2    | 4.84E-17 | -0.4703  | 0.655 | 0.928 | 9.10E-13 | Erythrocyt | TMA7    |
| 7625 | NDUFB2.2  | 5.52E-17 | -0.74121 | 0.34  | 0.641 | 1.04E-12 | Erythrocyt | NDUFB2  |
| 7626 | CD99.3    | 5.93E-17 | -1.11385 | 0.267 | 0.542 | 1.11E-12 | Erythrocyt | CD99    |
| 7627 | COX5A.4   | 5.94E-17 | -0.78283 | 0.267 | 0.562 | 1.12E-12 | Erythrocyt | COX5A   |
| 7628 | WDR1.1    | 6.03E-17 | -0.82922 | 0.214 | 0.509 | 1.13E-12 | Erythrocyt | WDR1    |
| 7629 | RPS25.3   | 6.86E-17 | -0.55615 | 0.811 | 0.992 | 1.29E-12 | Erythrocyt | RPS25   |
| 7630 | IFITM3.5  | 8.77E-17 | -1.59817 | 0.277 | 0.551 | 1.65E-12 | Erythrocyt | IFITM3  |
| 7631 | COX8A.3   | 8.99E-17 | -0.81287 | 0.316 | 0.615 | 1.69E-12 | Erythrocyt | COX8A   |
| 7632 | COX6A1.2  | 1.12E-16 | -0.58914 | 0.524 | 0.771 | 2.11E-12 | Erythrocyt | COX6A1  |
| 7633 | CNN2.3    | 1.20E-16 | -0.69298 | 0.369 | 0.683 | 2.25E-12 | Erythrocyt | CNN2    |
| 7634 | PSMB3.2   | 1.24E-16 | -0.76898 | 0.204 | 0.51  | 2.34E-12 | Erythrocyt | PSMB3   |
| 7635 | EDF1      | 1.28E-16 | -0.56478 | 0.437 | 0.772 | 2.41E-12 | Erythrocyt | EDF1    |
| 7636 | TUBA1B.3  | 1.35E-16 | -0.96827 | 0.233 | 0.519 | 2.53E-12 | Erythrocyt | TUBA1B  |
| 7637 | CD52.5    | 1.42E-16 | -0.62392 | 0.519 | 0.827 | 2.67E-12 | Erythrocyt | CD52    |
| 7638 | RAC1.2    | 1.60E-16 | -0.92008 | 0.214 | 0.498 | 3.01E-12 | Erythrocyt | RAC1    |
| 7639 | SELENOH.3 | 1.79E-16 | -0.70296 | 0.413 | 0.718 | 3.37E-12 | Erythrocyt | SELENOH |
| 7640 | MAP2K3.1  | 1.84E-16 | 1.055067 | 0.417 | 0.219 | 3.46E-12 | Erythrocyt | MAP2K3  |
| 7641 | GDI2.2    | 1.97E-16 | -0.74556 | 0.262 | 0.563 | 3.70E-12 | Erythrocyt | GDI2    |
| 7642 | RPL35A.4  | 2.25E-16 | -0.54991 | 0.845 | 0.989 | 4.22E-12 | Erythrocyt | RPL35A  |
| 7643 | BANF1     | 2.27E-16 | -0.76135 | 0.189 | 0.485 | 4.26E-12 | Erythrocyt | BANF1   |
| 7644 | RNASET2.3 | 2.39E-16 | -0.79914 | 0.316 | 0.602 | 4.50E-12 | Erythrocyt | RNASET2 |
| 7645 | RIPOR2.2  | 2.44E-16 | -0.81029 | 0.316 | 0.598 | 4.59E-12 | Erythrocyt | RIPOR2  |
| 7646 | RPL37.4   | 2.69E-16 | -0.52679 | 0.728 | 0.981 | 5.06E-12 | Erythrocyt | RPL37   |
| 7647 | LDHA.3    | 2.73E-16 | -0.73055 | 0.286 | 0.593 | 5.13E-12 | Erythrocyt | LDHA    |
| 7648 | COX6B1.3  | 2.91E-16 | -0.57375 | 0.549 | 0.815 | 5.47E-12 | Erythrocyt | COX6B1  |
| 7649 | NDUFB10   | 3.67E-16 | -0.7627  | 0.218 | 0.509 | 6.90E-12 | Erythrocyt | NDUFB10 |
| 7650 | ATP5MC3.. | 3.83E-16 | -0.64116 | 0.393 | 0.68  | 7.20E-12 | Erythrocyt | ATP5MC3 |
| 7651 | ARPC1B.2  | 4.03E-16 | -0.81495 | 0.189 | 0.478 | 7.58E-12 | Erythrocyt | ARPC1B  |
| 7652 | C4orf3.1  | 4.20E-16 | -0.68843 | 0.262 | 0.576 | 7.89E-12 | Erythrocyt | C4orf3  |
| 7653 | TRMT112.. | 4.70E-16 | -0.56619 | 0.34  | 0.676 | 8.83E-12 | Erythrocyt | TRMT112 |
| 7654 | SEC61B.3  | 5.08E-16 | -0.79246 | 0.301 | 0.581 | 9.54E-12 | Erythrocyt | SEC61B  |
| 7655 | EIF4G2    | 5.68E-16 | -0.78271 | 0.199 | 0.482 | 1.07E-11 | Erythrocyt | EIF4G2  |
| 7656 | BTF3.4    | 5.91E-16 | -0.45081 | 0.888 | 0.955 | 1.11E-11 | Erythrocyt | BTF3    |
| 7657 | HMGB1.3   | 6.04E-16 | -0.63835 | 0.549 | 0.815 | 1.13E-11 | Erythrocyt | HMGB1   |
| 7658 | PTPN6.4   | 6.06E-16 | -0.74945 | 0.296 | 0.606 | 1.14E-11 | Erythrocyt | PTPN6   |
| 7659 | RPS15.3   | 6.49E-16 | -0.52437 | 0.869 | 0.995 | 1.22E-11 | Erythrocyt | RPS15   |
| 7660 | PPP1R18.2 | 6.84E-16 | -0.74678 | 0.175 | 0.476 | 1.28E-11 | Erythrocyt | PPP1R18 |
| 7661 | RPL22.3   | 7.72E-16 | -0.54421 | 0.66  | 0.979 | 1.45E-11 | Erythrocyt | RPL22   |
| 7662 | SNRPD2.3  | 7.87E-16 | -0.5191  | 0.529 | 0.845 | 1.48E-11 | Erythrocyt | SNRPD2  |



|      |           |          |          |       |       |          |            |          |
|------|-----------|----------|----------|-------|-------|----------|------------|----------|
| 7663 | ARF5.3    | 1.06E-15 | -0.64407 | 0.243 | 0.543 | 1.99E-11 | Erythrocyt | ARF5     |
| 7664 | ANXA6.4   | 1.13E-15 | -0.71443 | 0.282 | 0.583 | 2.12E-11 | Erythrocyt | ANXA6    |
| 7665 | AES.4     | 1.23E-15 | -0.68136 | 0.451 | 0.733 | 2.31E-11 | Erythrocyt | AES      |
| 7666 | LITAF.3   | 1.26E-15 | -0.85881 | 0.252 | 0.546 | 2.37E-11 | Erythrocyt | LITAF    |
| 7667 | RPLP1.4   | 1.37E-15 | -0.5488  | 0.951 | 0.997 | 2.58E-11 | Erythrocyt | RPLP1    |
| 7668 | BCAP31    | 1.39E-15 | -0.66686 | 0.228 | 0.537 | 2.61E-11 | Erythrocyt | BCAP31   |
| 7669 | ATP6V1G1  | 1.40E-15 | -0.58911 | 0.481 | 0.792 | 2.63E-11 | Erythrocyt | ATP6V1G1 |
| 7670 | HLA-F.3   | 1.42E-15 | -0.77169 | 0.223 | 0.505 | 2.67E-11 | Erythrocyt | HLA-F    |
| 7671 | PPP2R1A.1 | 1.57E-15 | -0.73426 | 0.189 | 0.47  | 2.95E-11 | Erythrocyt | PPP2R1A  |
| 7672 | UQCRH.2   | 1.71E-15 | -0.5158  | 0.476 | 0.774 | 3.21E-11 | Erythrocyt | UQCRH    |
| 7673 | COMMD6.   | 1.76E-15 | -0.51438 | 0.578 | 0.917 | 3.30E-11 | Erythrocyt | COMMD6   |
| 7674 | ZYX.3     | 1.99E-15 | -0.93297 | 0.121 | 0.396 | 3.74E-11 | Erythrocyt | ZYX      |
| 7675 | CREG1.2   | 2.03E-15 | 0.647931 | 0.218 | 0.076 | 3.81E-11 | Erythrocyt | CREG1    |
| 7676 | BIN2.3    | 2.27E-15 | -0.76944 | 0.223 | 0.499 | 4.26E-11 | Erythrocyt | BIN2     |
| 7677 | EIF1B.3   | 2.32E-15 | 0.84404  | 0.563 | 0.371 | 4.36E-11 | Erythrocyt | EIF1B    |
| 7678 | CDC42.3   | 2.55E-15 | -0.66755 | 0.403 | 0.658 | 4.79E-11 | Erythrocyt | CDC42    |
| 7679 | RPS15A.3  | 2.66E-15 | -0.51571 | 0.903 | 0.997 | 5.00E-11 | Erythrocyt | RPS15A   |
| 7680 | VSIR.3    | 2.75E-15 | -0.93584 | 0.141 | 0.405 | 5.17E-11 | Erythrocyt | VSIR     |
| 7681 | ATP6V0E1. | 4.34E-15 | -0.65192 | 0.388 | 0.692 | 8.15E-11 | Erythrocyt | ATP6V0E1 |
| 7682 | VAMP8.4   | 4.38E-15 | -0.71299 | 0.306 | 0.584 | 8.22E-11 | Erythrocyt | VAMP8    |
| 7683 | RPS27A.3  | 4.65E-15 | -0.54873 | 0.796 | 0.995 | 8.74E-11 | Erythrocyt | RPS27A   |
| 7684 | BAG1      | 5.68E-15 | 0.702602 | 0.408 | 0.205 | 1.07E-10 | Erythrocyt | BAG1     |
| 7685 | HSP90AB1  | 6.03E-15 | -0.63931 | 0.66  | 0.843 | 1.13E-10 | Erythrocyt | HSP90AB1 |
| 7686 | RPL32.3   | 6.46E-15 | -0.53781 | 0.874 | 0.995 | 1.21E-10 | Erythrocyt | RPL32    |
| 7687 | PDIA3.3   | 6.85E-15 | -0.7739  | 0.238 | 0.51  | 1.29E-10 | Erythrocyt | PDIA3    |
| 7688 | RPL13A.1  | 8.23E-15 | -0.61483 | 0.408 | 0.719 | 1.55E-10 | Erythrocyt | RPL13A   |
| 7689 | GMFG.5    | 8.57E-15 | -0.55921 | 0.476 | 0.767 | 1.61E-10 | Erythrocyt | GMFG     |
| 7690 | RPS12.5   | 8.76E-15 | -0.49509 | 0.995 | 0.995 | 1.65E-10 | Erythrocyt | RPS12    |
| 7691 | ICAM3.1   | 8.88E-15 | -0.67712 | 0.325 | 0.611 | 1.67E-10 | Erythrocyt | ICAM3    |
| 7692 | BRD2      | 9.80E-15 | -0.76268 | 0.058 | 0.316 | 1.84E-10 | Erythrocyt | BRD2     |
| 7693 | HINT1.3   | 1.00E-14 | -0.48329 | 0.646 | 0.916 | 1.89E-10 | Erythrocyt | HINT1    |
| 7694 | PRMT2.4   | 1.14E-14 | -0.75734 | 0.252 | 0.536 | 2.14E-10 | Erythrocyt | PRMT2    |
| 7695 | RBM39     | 1.16E-14 | -0.68983 | 0.243 | 0.542 | 2.17E-10 | Erythrocyt | RBM39    |
| 7696 | RPL36AL.2 | 1.16E-14 | -0.47057 | 0.612 | 0.901 | 2.18E-10 | Erythrocyt | RPL36AL  |
| 7697 | ATP5F1A.2 | 1.20E-14 | -0.71588 | 0.257 | 0.536 | 2.25E-10 | Erythrocyt | ATP5F1A  |
| 7698 | SF1.3     | 1.24E-14 | -0.68395 | 0.316 | 0.592 | 2.32E-10 | Erythrocyt | SF1      |
| 7699 | HIGD2A.3  | 1.47E-14 | -0.6528  | 0.379 | 0.67  | 2.76E-10 | Erythrocyt | HIGD2A   |
| 7700 | SELPLG.3  | 1.48E-14 | -0.82124 | 0.199 | 0.464 | 2.79E-10 | Erythrocyt | SELPLG   |
| 7701 | RPS8.4    | 1.56E-14 | -0.53054 | 0.796 | 0.992 | 2.92E-10 | Erythrocyt | RPS8     |
| 7702 | ATP5F1C.2 | 1.66E-14 | -0.68569 | 0.262 | 0.537 | 3.12E-10 | Erythrocyt | ATP5F1C  |
| 7703 | LAMTOR4.  | 1.70E-14 | -0.6257  | 0.311 | 0.606 | 3.20E-10 | Erythrocyt | LAMTOR4  |
| 7704 | LRRFIP1.3 | 1.72E-14 | -0.76286 | 0.189 | 0.456 | 3.24E-10 | Erythrocyt | LRRFIP1  |
| 7705 | DDOST.4   | 1.75E-14 | -0.77884 | 0.18  | 0.441 | 3.28E-10 | Erythrocyt | DDOST    |
| 7706 | CCND3.4   | 1.76E-14 | -0.73528 | 0.316 | 0.589 | 3.30E-10 | Erythrocyt | CCND3    |
| 7707 | RPN2.2    | 1.81E-14 | -0.75291 | 0.155 | 0.422 | 3.40E-10 | Erythrocyt | RPN2     |
| 7708 | ARHGEF1.4 | 1.83E-14 | -0.73253 | 0.282 | 0.557 | 3.43E-10 | Erythrocyt | ARHGEF1  |
| 7709 | UCP2.5    | 1.99E-14 | -0.68712 | 0.602 | 0.781 | 3.74E-10 | Erythrocyt | UCP2     |

|      |           |          |          |       |       |          |            |          |
|------|-----------|----------|----------|-------|-------|----------|------------|----------|
| 7710 | RARRES3.4 | 2.10E-14 | -0.81056 | 0.282 | 0.557 | 3.95E-10 | Erythrocyt | RARRES3  |
| 7711 | TSC22D3.2 | 2.35E-14 | -0.72659 | 0.33  | 0.618 | 4.42E-10 | Erythrocyt | TSC22D3  |
| 7712 | HSP90AA1  | 2.57E-14 | -0.66843 | 0.49  | 0.715 | 4.82E-10 | Erythrocyt | HSP90AA1 |
| 7713 | BRK1.1    | 2.65E-14 | -0.59523 | 0.471 | 0.709 | 4.97E-10 | Erythrocyt | BRK1     |
| 7714 | OPTN.4    | 2.76E-14 | 0.663978 | 0.374 | 0.182 | 5.18E-10 | Erythrocyt | OPTN     |
| 7715 | HNRNPA0.  | 2.96E-14 | -0.70647 | 0.243 | 0.513 | 5.56E-10 | Erythrocyt | HNRNPA0  |
| 7716 | MT-ND5.1  | 3.56E-14 | -0.69148 | 0.456 | 0.717 | 6.69E-10 | Erythrocyt | MT-ND5   |
| 7717 | RPS16.2   | 3.58E-14 | -0.43907 | 0.612 | 0.927 | 6.73E-10 | Erythrocyt | RPS16    |
| 7718 | SRI.2     | 5.49E-14 | -0.65661 | 0.121 | 0.386 | 1.03E-09 | Erythrocyt | SRI      |
| 7719 | GRB2.2    | 5.62E-14 | -0.77683 | 0.155 | 0.411 | 1.06E-09 | Erythrocyt | GRB2     |
| 7720 | FERMT3.3  | 5.75E-14 | -0.77925 | 0.121 | 0.373 | 1.08E-09 | Erythrocyt | FERMT3   |
| 7721 | ATP5F1B.1 | 5.81E-14 | -0.61356 | 0.456 | 0.694 | 1.09E-09 | Erythrocyt | ATP5F1B  |
| 7722 | RPL7.3    | 7.06E-14 | -0.49775 | 0.592 | 0.869 | 1.33E-09 | Erythrocyt | RPL7     |
| 7723 | SRGN.4    | 7.20E-14 | -1.31816 | 0.165 | 0.406 | 1.35E-09 | Erythrocyt | SRGN     |
| 7724 | PHB2.3    | 7.83E-14 | -0.62069 | 0.267 | 0.572 | 1.47E-09 | Erythrocyt | PHB2     |
| 7725 | ATP6VOC.1 | 7.91E-14 | 0.831903 | 0.689 | 0.573 | 1.49E-09 | Erythrocyt | ATP6VOC  |
| 7726 | ATP6VOB.2 | 1.09E-13 | -0.71398 | 0.18  | 0.45  | 2.04E-09 | Erythrocyt | ATP6VOB  |
| 7727 | ACAP1.3   | 1.14E-13 | -0.70093 | 0.223 | 0.493 | 2.14E-09 | Erythrocyt | ACAP1    |
| 7728 | EWSR1.1   | 1.25E-13 | -0.70291 | 0.146 | 0.398 | 2.34E-09 | Erythrocyt | EWSR1    |
| 7729 | PARVG.3   | 1.25E-13 | -0.74963 | 0.087 | 0.332 | 2.34E-09 | Erythrocyt | PARVG    |
| 7730 | CALR.3    | 1.31E-13 | -0.78554 | 0.359 | 0.605 | 2.47E-09 | Erythrocyt | CALR     |
| 7731 | RNF213.5  | 1.32E-13 | -0.78977 | 0.146 | 0.398 | 2.48E-09 | Erythrocyt | RNF213   |
| 7732 | SERBP1.1  | 1.40E-13 | -0.6348  | 0.311 | 0.581 | 2.63E-09 | Erythrocyt | SERBP1   |
| 7733 | LMAN2.2   | 1.44E-13 | -0.69616 | 0.15  | 0.405 | 2.70E-09 | Erythrocyt | LMAN2    |
| 7734 | ANXA11.1  | 1.49E-13 | -0.60821 | 0.296 | 0.571 | 2.80E-09 | Erythrocyt | ANXA11   |
| 7735 | RGS19.4   | 1.51E-13 | -0.77673 | 0.155 | 0.409 | 2.84E-09 | Erythrocyt | RGS19    |
| 7736 | IER2.4    | 1.59E-13 | -0.8715  | 0.233 | 0.498 | 2.98E-09 | Erythrocyt | IER2     |
| 7737 | CCT7.1    | 1.59E-13 | -0.6606  | 0.199 | 0.465 | 2.98E-09 | Erythrocyt | CCT7     |
| 7738 | RPL41.2   | 1.69E-13 | -0.50855 | 0.99  | 0.999 | 3.18E-09 | Erythrocyt | RPL41    |
| 7739 | DPP7.1    | 1.87E-13 | -0.69132 | 0.204 | 0.464 | 3.50E-09 | Erythrocyt | DPP7     |
| 7740 | TWF2.2    | 1.89E-13 | -0.67548 | 0.175 | 0.436 | 3.55E-09 | Erythrocyt | TWF2     |
| 7741 | ARL6IP4.1 | 2.31E-13 | -0.588   | 0.345 | 0.624 | 4.34E-09 | Erythrocyt | ARL6IP4  |
| 7742 | ANXA2.4   | 2.34E-13 | -1.12927 | 0.073 | 0.305 | 4.39E-09 | Erythrocyt | ANXA2    |
| 7743 | COX7A2.2  | 2.35E-13 | -0.53744 | 0.437 | 0.698 | 4.42E-09 | Erythrocyt | COX7A2   |
| 7744 | PYCARD.3  | 2.38E-13 | -1.04908 | 0.131 | 0.368 | 4.47E-09 | Erythrocyt | PYCARD   |
| 7745 | AURKAIP1. | 2.45E-13 | -0.62862 | 0.165 | 0.424 | 4.60E-09 | Erythrocyt | AURKAIP1 |
| 7746 | APRT.3    | 2.79E-13 | -0.42678 | 0.451 | 0.749 | 5.24E-09 | Erythrocyt | APRT     |
| 7747 | PARK7     | 3.03E-13 | -0.58714 | 0.369 | 0.626 | 5.68E-09 | Erythrocyt | PARK7    |
| 7748 | HSP90B1.3 | 3.13E-13 | -0.92568 | 0.262 | 0.506 | 5.88E-09 | Erythrocyt | HSP90B1  |
| 7749 | H2AFZ.3   | 3.31E-13 | -0.72827 | 0.252 | 0.526 | 6.21E-09 | Erythrocyt | H2AFZ    |
| 7750 | SRRM1     | 3.32E-13 | -0.62738 | 0.194 | 0.466 | 6.24E-09 | Erythrocyt | SRRM1    |
| 7751 | ASCC2     | 3.68E-13 | 0.6037   | 0.34  | 0.164 | 6.91E-09 | Erythrocyt | ASCC2    |
| 7752 | ANXA1.5   | 3.71E-13 | -1.26518 | 0.112 | 0.351 | 6.97E-09 | Erythrocyt | ANXA1    |
| 7753 | TMEM59.2  | 3.77E-13 | -0.6054  | 0.291 | 0.558 | 7.08E-09 | Erythrocyt | TMEM59   |
| 7754 | SNRPB     | 5.03E-13 | -0.69776 | 0.194 | 0.448 | 9.45E-09 | Erythrocyt | SNRPB    |
| 7755 | RPL10A.3  | 5.08E-13 | -0.48469 | 0.65  | 0.955 | 9.55E-09 | Erythrocyt | RPL10A   |
| 7756 | TUBA1A.3  | 5.21E-13 | -0.76456 | 0.165 | 0.422 | 9.79E-09 | Erythrocyt | TUBA1A   |

|      |           |          |          |       |       |          |            |          |
|------|-----------|----------|----------|-------|-------|----------|------------|----------|
| 7757 | VDAC2.1   | 5.31E-13 | -0.69707 | 0.238 | 0.482 | 9.97E-09 | Erythrocyt | VDAC2    |
| 7758 | FYB1.5    | 5.46E-13 | -0.78666 | 0.311 | 0.572 | 1.02E-08 | Erythrocyt | FYB1     |
| 7759 | FKBP1A.3  | 5.58E-13 | -0.6792  | 0.35  | 0.585 | 1.05E-08 | Erythrocyt | FKBP1A   |
| 7760 | GLUL.3    | 5.80E-13 | 0.759196 | 0.34  | 0.17  | 1.09E-08 | Erythrocyt | GLUL     |
| 7761 | LAMP1.1   | 5.88E-13 | -0.69743 | 0.097 | 0.337 | 1.11E-08 | Erythrocyt | LAMP1    |
| 7762 | RSRP1.1   | 6.07E-13 | -0.6794  | 0.223 | 0.48  | 1.14E-08 | Erythrocyt | RSRP1    |
| 7763 | PNISR.3   | 7.19E-13 | -0.65126 | 0.296 | 0.557 | 1.35E-08 | Erythrocyt | PNISR    |
| 7764 | ATP5PD.2  | 7.50E-13 | -0.5693  | 0.277 | 0.552 | 1.41E-08 | Erythrocyt | ATP5PD   |
| 7765 | UBE2L6.1  | 7.61E-13 | -0.678   | 0.204 | 0.461 | 1.43E-08 | Erythrocyt | UBE2L6   |
| 7766 | DRAP1.3   | 7.61E-13 | -0.6001  | 0.291 | 0.541 | 1.43E-08 | Erythrocyt | DRAP1    |
| 7767 | TOMM7.3   | 7.61E-13 | -0.49354 | 0.505 | 0.822 | 1.43E-08 | Erythrocyt | TOMM7    |
| 7768 | TMEM50A   | 7.69E-13 | -0.66707 | 0.233 | 0.484 | 1.44E-08 | Erythrocyt | TMEM50A  |
| 7769 | TNFAIP8.4 | 7.72E-13 | -0.65193 | 0.228 | 0.494 | 1.45E-08 | Erythrocyt | TNFAIP8  |
| 7770 | ISCA1     | 8.97E-13 | 0.637803 | 0.301 | 0.142 | 1.68E-08 | Erythrocyt | ISCA1    |
| 7771 | SLC9A3R1. | 8.98E-13 | -0.821   | 0.17  | 0.415 | 1.69E-08 | Erythrocyt | SLC9A3R1 |
| 7772 | APEX1.3   | 9.69E-13 | -0.69267 | 0.223 | 0.483 | 1.82E-08 | Erythrocyt | APEX1    |
| 7773 | NDUFAB1.  | 9.74E-13 | -0.65589 | 0.204 | 0.447 | 1.83E-08 | Erythrocyt | NDUFAB1  |
| 7774 | STK38.2   | 1.03E-12 | -0.73596 | 0.087 | 0.316 | 1.93E-08 | Erythrocyt | STK38    |
| 7775 | NAP1L1.2  | 1.05E-12 | -0.70478 | 0.209 | 0.46  | 1.97E-08 | Erythrocyt | NAP1L1   |
| 7776 | TRAPPC1.1 | 1.06E-12 | -0.58515 | 0.345 | 0.611 | 1.99E-08 | Erythrocyt | TRAPPC1  |
| 7777 | SRSF11.2  | 1.09E-12 | -0.66889 | 0.17  | 0.422 | 2.05E-08 | Erythrocyt | SRSF11   |
| 7778 | GTF3A.1   | 1.17E-12 | -0.55044 | 0.311 | 0.584 | 2.21E-08 | Erythrocyt | GTF3A    |
| 7779 | UXT.2     | 1.18E-12 | -0.54496 | 0.388 | 0.658 | 2.21E-08 | Erythrocyt | UXT      |
| 7780 | PRRC2C    | 1.19E-12 | -0.63464 | 0.199 | 0.457 | 2.24E-08 | Erythrocyt | PRRC2C   |
| 7781 | RNH1.2    | 1.20E-12 | -0.74703 | 0.141 | 0.378 | 2.25E-08 | Erythrocyt | RNH1     |
| 7782 | ARHGAP4.  | 1.24E-12 | -0.67101 | 0.16  | 0.411 | 2.34E-08 | Erythrocyt | ARHGAP4  |
| 7783 | PPM1G     | 1.30E-12 | -0.66022 | 0.126 | 0.365 | 2.45E-08 | Erythrocyt | PPM1G    |
| 7784 | TAPBP     | 1.36E-12 | -0.62868 | 0.131 | 0.382 | 2.55E-08 | Erythrocyt | TAPBP    |
| 7785 | SAMHD1.4  | 1.36E-12 | -0.85366 | 0.184 | 0.417 | 2.56E-08 | Erythrocyt | SAMHD1   |
| 7786 | NDUFA4.3  | 1.50E-12 | -0.52499 | 0.471 | 0.718 | 2.81E-08 | Erythrocyt | NDUFA4   |
| 7787 | TNFRSF14. | 1.54E-12 | -0.58669 | 0.175 | 0.44  | 2.90E-08 | Erythrocyt | TNFRSF14 |
| 7788 | MFNG.3    | 1.66E-12 | -0.6874  | 0.097 | 0.331 | 3.13E-08 | Erythrocyt | MFNG     |
| 7789 | S100A4.4  | 1.74E-12 | -1.89433 | 0.33  | 0.54  | 3.26E-08 | Erythrocyt | S100A4   |
| 7790 | CSTB.2    | 1.78E-12 | -0.70675 | 0.218 | 0.467 | 3.35E-08 | Erythrocyt | CSTB     |
| 7791 | CNPY3.1   | 1.80E-12 | -0.61438 | 0.189 | 0.451 | 3.38E-08 | Erythrocyt | CNPY3    |
| 7792 | ACTR2.2   | 1.90E-12 | -0.72363 | 0.131 | 0.367 | 3.57E-08 | Erythrocyt | ACTR2    |
| 7793 | HNRNPC.1  | 2.08E-12 | -0.55755 | 0.325 | 0.615 | 3.91E-08 | Erythrocyt | HNRNPC   |
| 7794 | SEPT6.2   | 2.17E-12 | -0.62015 | 0.282 | 0.551 | 4.08E-08 | Erythrocyt | Sep-06   |
| 7795 | XRCC5     | 2.27E-12 | -0.66675 | 0.277 | 0.506 | 4.26E-08 | Erythrocyt | XRCC5    |
| 7796 | HDAC1.1   | 2.29E-12 | -0.66163 | 0.189 | 0.43  | 4.30E-08 | Erythrocyt | HDAC1    |
| 7797 | AHNAK.3   | 2.43E-12 | -0.92517 | 0.044 | 0.259 | 4.57E-08 | Erythrocyt | AHNAK    |
| 7798 | NCOR1.1   | 2.54E-12 | -0.66068 | 0.15  | 0.39  | 4.77E-08 | Erythrocyt | NCOR1    |
| 7799 | COPE.2    | 2.76E-12 | -0.58158 | 0.209 | 0.487 | 5.18E-08 | Erythrocyt | COPE     |
| 7800 | MYH9.2    | 2.80E-12 | -0.67125 | 0.214 | 0.464 | 5.25E-08 | Erythrocyt | MYH9     |
| 7801 | CD44.3    | 2.82E-12 | -0.65545 | 0.184 | 0.439 | 5.29E-08 | Erythrocyt | CD44     |
| 7802 | PGLS.2    | 2.84E-12 | -0.59908 | 0.199 | 0.461 | 5.34E-08 | Erythrocyt | PGLS     |
| 7803 | PLEK.3    | 2.99E-12 | -0.98912 | 0.029 | 0.236 | 5.61E-08 | Erythrocyt | PLEK     |

|      |            |          |          |       |       |          |            |          |
|------|------------|----------|----------|-------|-------|----------|------------|----------|
| 7804 | HNRNPA3.   | 3.12E-12 | -0.59627 | 0.286 | 0.538 | 5.87E-08 | Erythrocyt | HNRNPA3  |
| 7805 | DAD1.2     | 3.14E-12 | -0.59337 | 0.33  | 0.585 | 5.89E-08 | Erythrocyt | DAD1     |
| 7806 | AUP1       | 3.36E-12 | -0.61758 | 0.238 | 0.482 | 6.31E-08 | Erythrocyt | AUP1     |
| 7807 | RPS11.3    | 3.41E-12 | -0.40675 | 0.573 | 0.815 | 6.41E-08 | Erythrocyt | RPS11    |
| 7808 | TRAF3IP3.4 | 3.53E-12 | -0.54385 | 0.403 | 0.662 | 6.63E-08 | Erythrocyt | TRAF3IP3 |
| 7809 | MIF.3      | 3.64E-12 | -0.46837 | 0.539 | 0.835 | 6.84E-08 | Erythrocyt | MIF      |
| 7810 | SAP18.1    | 3.71E-12 | -0.53625 | 0.388 | 0.637 | 6.96E-08 | Erythrocyt | SAP18    |
| 7811 | CDC37.1    | 3.82E-12 | -0.56702 | 0.335 | 0.598 | 7.17E-08 | Erythrocyt | CDC37    |
| 7812 | SYNGR2.3   | 4.77E-12 | -0.62748 | 0.262 | 0.516 | 8.96E-08 | Erythrocyt | SYNGR2   |
| 7813 | UFC1.1     | 4.94E-12 | -0.5709  | 0.248 | 0.511 | 9.29E-08 | Erythrocyt | UFC1     |
| 7814 | COX6C.1    | 4.94E-12 | -0.47769 | 0.485 | 0.77  | 9.29E-08 | Erythrocyt | COX6C    |
| 7815 | SNX17.1    | 5.43E-12 | -0.58853 | 0.18  | 0.42  | 1.02E-07 | Erythrocyt | SNX17    |
| 7816 | OTUB1      | 5.68E-12 | -0.56725 | 0.238 | 0.509 | 1.07E-07 | Erythrocyt | OTUB1    |
| 7817 | SRSF2.1    | 5.76E-12 | -0.6382  | 0.17  | 0.412 | 1.08E-07 | Erythrocyt | SRSF2    |
| 7818 | SF3B4      | 6.12E-12 | -0.61176 | 0.107 | 0.336 | 1.15E-07 | Erythrocyt | SF3B4    |
| 7819 | CD47.2     | 6.93E-12 | -0.60648 | 0.214 | 0.471 | 1.30E-07 | Erythrocyt | CD47     |
| 7820 | RPS24.4    | 7.39E-12 | -0.44372 | 0.82  | 0.995 | 1.39E-07 | Erythrocyt | RPS24    |
| 7821 | MYL6.3     | 7.92E-12 | -0.53812 | 0.893 | 0.948 | 1.49E-07 | Erythrocyt | MYL6     |
| 7822 | CTSS.2     | 8.73E-12 | -1.14928 | 0.131 | 0.361 | 1.64E-07 | Erythrocyt | CTSS     |
| 7823 | RHOH.4     | 8.99E-12 | -0.6252  | 0.209 | 0.46  | 1.69E-07 | Erythrocyt | RHOH     |
| 7824 | COX7A2L.1  | 1.02E-11 | -0.51482 | 0.291 | 0.532 | 1.91E-07 | Erythrocyt | COX7A2L  |
| 7825 | RNPS1.3    | 1.12E-11 | -0.5936  | 0.209 | 0.45  | 2.10E-07 | Erythrocyt | RNPS1    |
| 7826 | GSTK1.2    | 1.12E-11 | -0.53537 | 0.393 | 0.678 | 2.11E-07 | Erythrocyt | GSTK1    |
| 7827 | FAM49B.1   | 1.20E-11 | -0.65571 | 0.189 | 0.431 | 2.25E-07 | Erythrocyt | FAM49B   |
| 7828 | RPL22L1.4  | 1.20E-11 | -0.62292 | 0.214 | 0.465 | 2.25E-07 | Erythrocyt | RPL22L1  |
| 7829 | HLA-DRB5.  | 1.21E-11 | -1.63891 | 0.165 | 0.394 | 2.27E-07 | Erythrocyt | HLA-DRB5 |
| 7830 | EPC1.1     | 1.25E-11 | -0.65338 | 0.194 | 0.437 | 2.34E-07 | Erythrocyt | EPC1     |
| 7831 | JAZF1.2    | 1.29E-11 | 0.418415 | 0.228 | 0.092 | 2.42E-07 | Erythrocyt | JAZF1    |
| 7832 | XBP1.4     | 1.36E-11 | -0.90686 | 0.146 | 0.367 | 2.55E-07 | Erythrocyt | XBP1     |
| 7833 | ENSA.2     | 1.53E-11 | -0.60945 | 0.121 | 0.348 | 2.87E-07 | Erythrocyt | ENSA     |
| 7834 | NDUFB11    | 1.56E-11 | -0.44746 | 0.451 | 0.696 | 2.94E-07 | Erythrocyt | NDUFB11  |
| 7835 | SEPT1.4    | 1.58E-11 | -0.63301 | 0.335 | 0.579 | 2.97E-07 | Erythrocyt | Sep-01   |
| 7836 | P4HB.2     | 1.59E-11 | -0.65667 | 0.155 | 0.386 | 2.99E-07 | Erythrocyt | P4HB     |
| 7837 | CALM3.1    | 1.84E-11 | -0.63652 | 0.267 | 0.511 | 3.45E-07 | Erythrocyt | CALM3    |
| 7838 | VAPA.2     | 1.86E-11 | -0.57382 | 0.214 | 0.464 | 3.49E-07 | Erythrocyt | VAPA     |
| 7839 | IQGAP1.2   | 1.90E-11 | -0.67564 | 0.083 | 0.298 | 3.57E-07 | Erythrocyt | IQGAP1   |
| 7840 | EID1.1     | 1.98E-11 | -0.60041 | 0.267 | 0.493 | 3.72E-07 | Erythrocyt | EID1     |
| 7841 | TAP1.3     | 2.00E-11 | -0.69617 | 0.146 | 0.369 | 3.76E-07 | Erythrocyt | TAP1     |
| 7842 | SASH3.2    | 2.03E-11 | -0.57563 | 0.107 | 0.333 | 3.81E-07 | Erythrocyt | SASH3    |
| 7843 | KMT2E.3    | 2.06E-11 | -0.57368 | 0.209 | 0.449 | 3.87E-07 | Erythrocyt | KMT2E    |
| 7844 | TMED10.2   | 2.06E-11 | -0.62282 | 0.117 | 0.33  | 3.87E-07 | Erythrocyt | TMED10   |
| 7845 | CLTA.2     | 2.07E-11 | -0.64066 | 0.199 | 0.427 | 3.90E-07 | Erythrocyt | CLTA     |
| 7846 | EZR.3      | 2.20E-11 | -0.70167 | 0.18  | 0.424 | 4.13E-07 | Erythrocyt | EZR      |
| 7847 | PSMA5.2    | 2.24E-11 | -0.61846 | 0.175 | 0.41  | 4.20E-07 | Erythrocyt | PSMA5    |
| 7848 | SESN3      | 2.25E-11 | 0.485943 | 0.233 | 0.097 | 4.23E-07 | Erythrocyt | SESN3    |
| 7849 | OCIAD1.2   | 2.44E-11 | -0.53429 | 0.194 | 0.429 | 4.58E-07 | Erythrocyt | OCIAD1   |
| 7850 | PSMD8.1    | 2.63E-11 | -0.60713 | 0.204 | 0.431 | 4.95E-07 | Erythrocyt | PSMD8    |

|      |            |          |          |       |       |          |            |          |
|------|------------|----------|----------|-------|-------|----------|------------|----------|
| 7851 | C11orf58.1 | 2.66E-11 | -0.56031 | 0.34  | 0.57  | 4.99E-07 | Erythrocyt | C11orf58 |
| 7852 | REX1BD.1   | 2.75E-11 | -0.45158 | 0.223 | 0.469 | 5.16E-07 | Erythrocyt | REX1BD   |
| 7853 | ARHGAP9.   | 2.89E-11 | -0.61114 | 0.126 | 0.363 | 5.43E-07 | Erythrocyt | ARHGAP9  |
| 7854 | OSTC.3     | 2.92E-11 | -0.59705 | 0.199 | 0.435 | 5.49E-07 | Erythrocyt | OSTC     |
| 7855 | UQCRCQ.3   | 2.98E-11 | -0.55417 | 0.233 | 0.481 | 5.60E-07 | Erythrocyt | UQCRCQ   |
| 7856 | HSPA5.4    | 2.99E-11 | -0.7907  | 0.17  | 0.392 | 5.62E-07 | Erythrocyt | HSPA5    |
| 7857 | RALY.1     | 3.02E-11 | -0.56506 | 0.184 | 0.429 | 5.67E-07 | Erythrocyt | RALY     |
| 7858 | TAGAP.4    | 3.26E-11 | -0.73122 | 0.189 | 0.409 | 6.13E-07 | Erythrocyt | TAGAP    |
| 7859 | SNX6       | 3.27E-11 | -0.56216 | 0.17  | 0.414 | 6.13E-07 | Erythrocyt | SNX6     |
| 7860 | SERPINB1.  | 3.28E-11 | -0.68495 | 0.214 | 0.448 | 6.17E-07 | Erythrocyt | SERPINB1 |
| 7861 | CLNS1A.2   | 3.37E-11 | -0.55461 | 0.165 | 0.406 | 6.32E-07 | Erythrocyt | CLNS1A   |
| 7862 | PAXX.4     | 3.42E-11 | -0.61978 | 0.306 | 0.548 | 6.42E-07 | Erythrocyt | PAXX     |
| 7863 | DDX17      | 3.55E-11 | -0.575   | 0.238 | 0.477 | 6.66E-07 | Erythrocyt | DDX17    |
| 7864 | ATP6AP2.1  | 3.64E-11 | -0.62883 | 0.17  | 0.391 | 6.85E-07 | Erythrocyt | ATP6AP2  |
| 7865 | ATP5IF1    | 3.77E-11 | -0.51596 | 0.32  | 0.58  | 7.08E-07 | Erythrocyt | ATP5IF1  |
| 7866 | VAMP2.2    | 3.77E-11 | -0.6716  | 0.184 | 0.405 | 7.08E-07 | Erythrocyt | VAMP2    |
| 7867 | CIB1.2     | 4.05E-11 | -0.55404 | 0.262 | 0.518 | 7.61E-07 | Erythrocyt | CIB1     |
| 7868 | RPL27A.1   | 4.10E-11 | -0.44717 | 0.398 | 0.661 | 7.70E-07 | Erythrocyt | RPL27A   |
| 7869 | MYO1G.3    | 4.16E-11 | -0.60835 | 0.063 | 0.27  | 7.82E-07 | Erythrocyt | MYO1G    |
| 7870 | HMGNI.3    | 4.17E-11 | -0.54511 | 0.461 | 0.718 | 7.83E-07 | Erythrocyt | HMGNI    |
| 7871 | SNRPA.2    | 4.47E-11 | -0.51948 | 0.15  | 0.384 | 8.40E-07 | Erythrocyt | SNRPA    |
| 7872 | RPL23.2    | 4.68E-11 | -0.48867 | 0.388 | 0.656 | 8.79E-07 | Erythrocyt | RPL23    |
| 7873 | CBX3.1     | 4.72E-11 | -0.61554 | 0.17  | 0.395 | 8.86E-07 | Erythrocyt | CBX3     |
| 7874 | COP5.1     | 4.98E-11 | -0.61341 | 0.083 | 0.29  | 9.36E-07 | Erythrocyt | COP5     |
| 7875 | NOP53.2    | 5.00E-11 | -0.49644 | 0.364 | 0.647 | 9.39E-07 | Erythrocyt | NOP53    |
| 7876 | RAD21.2    | 5.14E-11 | -0.59381 | 0.131 | 0.352 | 9.65E-07 | Erythrocyt | RAD21    |
| 7877 | CYFIP2.1   | 5.38E-11 | -0.60113 | 0.112 | 0.329 | 1.01E-06 | Erythrocyt | CYFIP2   |
| 7878 | RPLP2.3    | 5.38E-11 | -0.35036 | 0.806 | 0.97  | 1.01E-06 | Erythrocyt | RPLP2    |
| 7879 | PGAM1.4    | 5.61E-11 | -0.58847 | 0.267 | 0.498 | 1.05E-06 | Erythrocyt | PGAM1    |
| 7880 | TPM4.4     | 5.69E-11 | -0.73031 | 0.049 | 0.245 | 1.07E-06 | Erythrocyt | TPM4     |
| 7881 | PPDPF.1    | 6.19E-11 | -0.50118 | 0.558 | 0.806 | 1.16E-06 | Erythrocyt | PPDPF    |
| 7882 | EML4.1     | 6.22E-11 | -0.65179 | 0.097 | 0.304 | 1.17E-06 | Erythrocyt | EML4     |
| 7883 | ILF2.3     | 6.29E-11 | -0.60058 | 0.214 | 0.445 | 1.18E-06 | Erythrocyt | ILF2     |
| 7884 | N4BP2L2.2  | 6.29E-11 | -0.52894 | 0.248 | 0.488 | 1.18E-06 | Erythrocyt | N4BP2L2  |
| 7885 | FLNA.5     | 6.79E-11 | -0.79696 | 0.141 | 0.353 | 1.28E-06 | Erythrocyt | FLNA     |
| 7886 | RHOG.3     | 7.51E-11 | -0.66081 | 0.286 | 0.515 | 1.41E-06 | Erythrocyt | RHOG     |
| 7887 | HNRNPU     | 8.37E-11 | -0.5494  | 0.218 | 0.452 | 1.57E-06 | Erythrocyt | HNRNPU   |
| 7888 | HSBP1.2    | 8.57E-11 | -0.66671 | 0.078 | 0.281 | 1.61E-06 | Erythrocyt | HSBP1    |
| 7889 | CCT5       | 8.85E-11 | -0.58133 | 0.18  | 0.401 | 1.66E-06 | Erythrocyt | CCT5     |
| 7890 | SEM1.3     | 8.86E-11 | -0.55555 | 0.18  | 0.416 | 1.66E-06 | Erythrocyt | SEM1     |
| 7891 | PPP1R12A.  | 8.93E-11 | -0.64615 | 0.087 | 0.292 | 1.68E-06 | Erythrocyt | PPP1R12A |
| 7892 | S100A11.3  | 9.20E-11 | -1.65495 | 0.262 | 0.469 | 1.73E-06 | Erythrocyt | S100A11  |
| 7893 | TRAM1.2    | 9.61E-11 | -0.59231 | 0.18  | 0.398 | 1.80E-06 | Erythrocyt | TRAM1    |
| 7894 | UBL5.2     | 9.72E-11 | -0.43191 | 0.544 | 0.738 | 1.83E-06 | Erythrocyt | UBL5     |
| 7895 | LBR        | 9.78E-11 | -0.60422 | 0.112 | 0.327 | 1.84E-06 | Erythrocyt | LBR      |
| 7896 | GLRX.2     | 9.83E-11 | -0.59934 | 0.141 | 0.361 | 1.85E-06 | Erythrocyt | GLRX     |
| 7897 | C8orf59    | 1.06E-10 | -0.51427 | 0.252 | 0.489 | 2.00E-06 | Erythrocyt | C8orf59  |

|                |          |          |       |       |          |            |           |
|----------------|----------|----------|-------|-------|----------|------------|-----------|
| 7898 DDT       | 1.09E-10 | -0.5248  | 0.282 | 0.531 | 2.05E-06 | Erythrocyt | DDT       |
| 7899 STK4.2    | 1.15E-10 | -0.50286 | 0.252 | 0.512 | 2.15E-06 | Erythrocyt | STK4      |
| 7900 EIF2S3.1  | 1.21E-10 | -0.58388 | 0.228 | 0.456 | 2.27E-06 | Erythrocyt | EIF2S3    |
| 7901 LSM7.3    | 1.27E-10 | -0.47388 | 0.388 | 0.643 | 2.39E-06 | Erythrocyt | LSM7      |
| 7902 AKR1A1.3  | 1.29E-10 | -0.61431 | 0.092 | 0.293 | 2.43E-06 | Erythrocyt | AKR1A1    |
| 7903 NDUFB9.1  | 1.30E-10 | -0.50531 | 0.35  | 0.593 | 2.44E-06 | Erythrocyt | NDUFB9    |
| 7904 RTRAF.1   | 1.32E-10 | -0.51847 | 0.301 | 0.548 | 2.49E-06 | Erythrocyt | RTRAF     |
| 7905 CTSC.4    | 1.33E-10 | -0.78956 | 0.126 | 0.334 | 2.50E-06 | Erythrocyt | CTSC      |
| 7906 HMGN3.1   | 1.37E-10 | -0.5197  | 0.209 | 0.449 | 2.56E-06 | Erythrocyt | HMGN3     |
| 7907 FOXP1.3   | 1.43E-10 | -0.6107  | 0.214 | 0.435 | 2.68E-06 | Erythrocyt | FOXP1     |
| 7908 RPS28.4   | 1.44E-10 | -0.42826 | 0.796 | 0.995 | 2.70E-06 | Erythrocyt | RPS28     |
| 7909 DEK.2     | 1.46E-10 | -0.6164  | 0.117 | 0.328 | 2.74E-06 | Erythrocyt | DEK       |
| 7910 PSAP.3    | 1.47E-10 | -1.06081 | 0.209 | 0.41  | 2.76E-06 | Erythrocyt | PSAP      |
| 7911 FCER1G.3  | 1.47E-10 | -1.95873 | 0.039 | 0.222 | 2.76E-06 | Erythrocyt | FCER1G    |
| 7912 RTF2      | 1.47E-10 | -0.59551 | 0.107 | 0.317 | 2.77E-06 | Erythrocyt | RTF2      |
| 7913 DDX46     | 1.52E-10 | -0.56542 | 0.117 | 0.332 | 2.85E-06 | Erythrocyt | DDX46     |
| 7914 TCF25.1   | 1.53E-10 | -0.62778 | 0.18  | 0.409 | 2.88E-06 | Erythrocyt | TCF25     |
| 7915 CYTH1.2   | 1.57E-10 | -0.62419 | 0.131 | 0.345 | 2.95E-06 | Erythrocyt | CYTH1     |
| 7916 LGALS1.3  | 1.60E-10 | -2.03989 | 0.049 | 0.231 | 3.00E-06 | Erythrocyt | LGALS1    |
| 7917 ATP6V1F.1 | 1.61E-10 | -0.52892 | 0.267 | 0.492 | 3.03E-06 | Erythrocyt | ATP6V1F   |
| 7918 CCT8.3    | 1.67E-10 | -0.52808 | 0.248 | 0.473 | 3.15E-06 | Erythrocyt | CCT8      |
| 7919 LDHB.4    | 1.71E-10 | -0.58509 | 0.495 | 0.743 | 3.22E-06 | Erythrocyt | LDHB      |
| 7920 FGR.3     | 1.75E-10 | -0.89192 | 0.039 | 0.226 | 3.28E-06 | Erythrocyt | FGR       |
| 7921 EIF3I.1   | 1.76E-10 | -0.55333 | 0.194 | 0.425 | 3.31E-06 | Erythrocyt | EIF3I     |
| 7922 PAK2.2    | 1.80E-10 | -0.57785 | 0.146 | 0.369 | 3.39E-06 | Erythrocyt | PAK2      |
| 7923 AP1M1.1   | 1.81E-10 | -0.59035 | 0.087 | 0.287 | 3.39E-06 | Erythrocyt | AP1M1     |
| 7924 SNRPG.1   | 1.95E-10 | -0.48134 | 0.262 | 0.521 | 3.66E-06 | Erythrocyt | SNRPG     |
| 7925 ANAPC16.3 | 1.97E-10 | -0.46131 | 0.461 | 0.68  | 3.69E-06 | Erythrocyt | ANAPC16   |
| 7926 SNRPD3    | 1.98E-10 | -0.56965 | 0.243 | 0.474 | 3.72E-06 | Erythrocyt | SNRPD3    |
| 7927 ADD3.4    | 2.14E-10 | -0.54226 | 0.243 | 0.493 | 4.03E-06 | Erythrocyt | ADD3      |
| 7928 LCP2.2    | 2.35E-10 | -0.64168 | 0.146 | 0.356 | 4.41E-06 | Erythrocyt | LCP2      |
| 7929 CCT4.2    | 2.36E-10 | -0.54049 | 0.272 | 0.516 | 4.44E-06 | Erythrocyt | CCT4      |
| 7930 NDUFB4.2  | 2.39E-10 | -0.44206 | 0.311 | 0.567 | 4.48E-06 | Erythrocyt | NDUFB4    |
| 7931 ATP5MD.3  | 2.45E-10 | -0.47876 | 0.34  | 0.614 | 4.61E-06 | Erythrocyt | ATP5MD    |
| 7932 TRBC2.3   | 2.45E-10 | -0.59074 | 0.437 | 0.678 | 4.61E-06 | Erythrocyt | TRBC2     |
| 7933 HNRNPM    | 2.53E-10 | -0.57359 | 0.17  | 0.395 | 4.76E-06 | Erythrocyt | HNRNPM    |
| 7934 ANXA5.3   | 2.57E-10 | -0.78099 | 0.078 | 0.272 | 4.82E-06 | Erythrocyt | ANXA5     |
| 7935 CYBC1.2   | 2.59E-10 | -0.52623 | 0.18  | 0.408 | 4.87E-06 | Erythrocyt | CYBC1     |
| 7936 NDUFA12.3 | 2.61E-10 | -0.5289  | 0.32  | 0.557 | 4.89E-06 | Erythrocyt | NDUFA12   |
| 7937 MAPK1IP1  | 2.62E-10 | -0.61041 | 0.068 | 0.257 | 4.93E-06 | Erythrocyt | MAPK1IP1L |
| 7938 COX7C.3   | 2.63E-10 | -0.36693 | 0.68  | 0.894 | 4.94E-06 | Erythrocyt | COX7C     |
| 7939 STX10.2   | 2.64E-10 | -0.54571 | 0.063 | 0.263 | 4.96E-06 | Erythrocyt | STX10     |
| 7940 CYC1.1    | 2.65E-10 | -0.54284 | 0.121 | 0.332 | 4.97E-06 | Erythrocyt | CYC1      |
| 7941 SNRPD1.2  | 2.65E-10 | -0.55546 | 0.136 | 0.349 | 4.98E-06 | Erythrocyt | SNRPD1    |
| 7942 PDIA6.3   | 2.81E-10 | -0.61254 | 0.155 | 0.367 | 5.27E-06 | Erythrocyt | PDIA6     |
| 7943 MORF4L1.3 | 2.85E-10 | -0.45969 | 0.413 | 0.607 | 5.36E-06 | Erythrocyt | MORF4L1   |
| 7944 TECR.3    | 3.11E-10 | -0.56843 | 0.214 | 0.444 | 5.84E-06 | Erythrocyt | TECR      |

|      |           |          |          |       |       |          |            |          |
|------|-----------|----------|----------|-------|-------|----------|------------|----------|
| 7945 | ZAP70.5   | 3.16E-10 | -0.66998 | 0.16  | 0.375 | 5.93E-06 | Erythrocyt | ZAP70    |
| 7946 | SF3B1.1   | 3.16E-10 | -0.5975  | 0.223 | 0.445 | 5.93E-06 | Erythrocyt | SF3B1    |
| 7947 | TMEM258   | 3.19E-10 | -0.43841 | 0.393 | 0.637 | 5.99E-06 | Erythrocyt | TMEM258  |
| 7948 | CDC42SE1  | 3.19E-10 | -0.6291  | 0.214 | 0.422 | 6.00E-06 | Erythrocyt | CDC42SE1 |
| 7949 | HLA-DPA1  | 3.33E-10 | -1.12784 | 0.243 | 0.462 | 6.26E-06 | Erythrocyt | HLA-DPA1 |
| 7950 | NDUFV1.1  | 3.54E-10 | -0.53371 | 0.141 | 0.359 | 6.65E-06 | Erythrocyt | NDUFV1   |
| 7951 | RBL2.4    | 3.69E-10 | -0.55037 | 0.165 | 0.386 | 6.94E-06 | Erythrocyt | RBL2     |
| 7952 | LBH.4     | 4.13E-10 | -0.66023 | 0.277 | 0.489 | 7.75E-06 | Erythrocyt | LBH      |
| 7953 | ARRB2.4   | 4.25E-10 | -0.68512 | 0.209 | 0.411 | 7.98E-06 | Erythrocyt | ARRB2    |
| 7954 | SYF2      | 4.30E-10 | -0.53384 | 0.218 | 0.439 | 8.08E-06 | Erythrocyt | SYF2     |
| 7955 | C19orf53  | 4.36E-10 | -0.39486 | 0.379 | 0.63  | 8.18E-06 | Erythrocyt | C19orf53 |
| 7956 | TBCA      | 4.36E-10 | -0.49428 | 0.34  | 0.578 | 8.18E-06 | Erythrocyt | TBCA     |
| 7957 | TMOD3.2   | 4.43E-10 | -0.56071 | 0.058 | 0.247 | 8.33E-06 | Erythrocyt | TMOD3    |
| 7958 | UQCR10.2  | 4.46E-10 | -0.36759 | 0.476 | 0.725 | 8.37E-06 | Erythrocyt | UQCR10   |
| 7959 | TMC6.1    | 4.50E-10 | -0.55831 | 0.112 | 0.315 | 8.45E-06 | Erythrocyt | TMC6     |
| 7960 | JUNB.3    | 4.50E-10 | -0.76762 | 0.33  | 0.573 | 8.46E-06 | Erythrocyt | JUNB     |
| 7961 | M6PR.1    | 4.55E-10 | -0.51744 | 0.16  | 0.371 | 8.55E-06 | Erythrocyt | M6PR     |
| 7962 | CAST.2    | 4.58E-10 | -0.67983 | 0.146 | 0.357 | 8.60E-06 | Erythrocyt | CAST     |
| 7963 | SAT1.2    | 4.58E-10 | -1.35878 | 0.233 | 0.438 | 8.61E-06 | Erythrocyt | SAT1     |
| 7964 | PPP1R2.2  | 4.95E-10 | -0.54538 | 0.194 | 0.422 | 9.31E-06 | Erythrocyt | PPP1R2   |
| 7965 | HIST1H4C. | 5.00E-10 | -0.63748 | 0.417 | 0.639 | 9.39E-06 | Erythrocyt | HIST1H4C |
| 7966 | TRABD.2   | 5.13E-10 | -0.53045 | 0.16  | 0.369 | 9.64E-06 | Erythrocyt | TRABD    |
| 7967 | BTG2.2    | 5.14E-10 | -0.61875 | 0.087 | 0.285 | 9.66E-06 | Erythrocyt | BTG2     |
| 7968 | OSBPL8.2  | 5.22E-10 | -0.56901 | 0.053 | 0.241 | 9.81E-06 | Erythrocyt | OSBPL8   |
| 7969 | DNAJC15.2 | 5.25E-10 | -0.58207 | 0.131 | 0.338 | 9.87E-06 | Erythrocyt | DNAJC15  |
| 7970 | CD55.3    | 5.44E-10 | -0.71387 | 0.218 | 0.418 | 1.02E-05 | Erythrocyt | CD55     |
| 7971 | IL32.5    | 5.59E-10 | -0.95158 | 0.379 | 0.569 | 1.05E-05 | Erythrocyt | IL32     |
| 7972 | RCSD1.2   | 5.62E-10 | -0.57114 | 0.194 | 0.432 | 1.05E-05 | Erythrocyt | RCSD1    |
| 7973 | ANAPC11.  | 5.72E-10 | -0.53098 | 0.204 | 0.431 | 1.07E-05 | Erythrocyt | ANAPC11  |
| 7974 | ITGA4.1   | 5.77E-10 | -0.6412  | 0.15  | 0.356 | 1.08E-05 | Erythrocyt | ITGA4    |
| 7975 | LTB.4     | 5.88E-10 | -0.52748 | 0.607 | 0.81  | 1.10E-05 | Erythrocyt | LTB      |
| 7976 | R3HDM4    | 6.24E-10 | 0.53888  | 0.534 | 0.354 | 1.17E-05 | Erythrocyt | R3HDM4   |
| 7977 | SRSF7.2   | 6.28E-10 | -0.54556 | 0.316 | 0.552 | 1.18E-05 | Erythrocyt | SRSF7    |
| 7978 | NFKBIA.3  | 6.37E-10 | -0.72953 | 0.126 | 0.329 | 1.20E-05 | Erythrocyt | NFKBIA   |
| 7979 | GSTP1.4   | 6.72E-10 | -0.79433 | 0.32  | 0.531 | 1.26E-05 | Erythrocyt | GSTP1    |
| 7980 | EIF5A.2   | 6.94E-10 | -0.56668 | 0.316 | 0.531 | 1.30E-05 | Erythrocyt | EIF5A    |
| 7981 | C9orf16.3 | 6.94E-10 | -0.43791 | 0.35  | 0.597 | 1.30E-05 | Erythrocyt | C9orf16  |
| 7982 | GLIPR2.3  | 7.10E-10 | -0.61264 | 0.024 | 0.198 | 1.33E-05 | Erythrocyt | GLIPR2   |
| 7983 | HVCN1.5   | 7.62E-10 | -0.85164 | 0.083 | 0.285 | 1.43E-05 | Erythrocyt | HVCN1    |
| 7984 | RPN1.1    | 7.65E-10 | -0.50216 | 0.15  | 0.363 | 1.44E-05 | Erythrocyt | RPN1     |
| 7985 | MRPS21.1  | 8.27E-10 | -0.4404  | 0.291 | 0.544 | 1.55E-05 | Erythrocyt | MRPS21   |
| 7986 | RBMX.3    | 9.19E-10 | -0.60115 | 0.16  | 0.363 | 1.73E-05 | Erythrocyt | RBMX     |
| 7987 | YWHAQ.3   | 9.40E-10 | -0.57825 | 0.199 | 0.412 | 1.77E-05 | Erythrocyt | YWHAQ    |
| 7988 | WASHC1.1  | 9.53E-10 | -0.59598 | 0.155 | 0.352 | 1.79E-05 | Erythrocyt | WASHC1   |
| 7989 | PSMB6.2   | 9.54E-10 | -0.49146 | 0.238 | 0.467 | 1.79E-05 | Erythrocyt | PSMB6    |
| 7990 | SELENOF.3 | 9.70E-10 | -0.51329 | 0.238 | 0.459 | 1.82E-05 | Erythrocyt | SELENOF  |
| 7991 | CD164     | 9.73E-10 | -0.55416 | 0.194 | 0.408 | 1.83E-05 | Erythrocyt | CD164    |

|      |            |          |          |       |       |          |            |          |
|------|------------|----------|----------|-------|-------|----------|------------|----------|
| 7992 | SMIM26.1   | 1.00E-09 | -0.46029 | 0.214 | 0.456 | 1.88E-05 | Erythrocyt | SMIM26   |
| 7993 | EPB41.3    | 1.01E-09 | 0.534492 | 0.456 | 0.289 | 1.90E-05 | Erythrocyt | EPB41    |
| 7994 | LYN.4      | 1.05E-09 | -0.77193 | 0.058 | 0.237 | 1.98E-05 | Erythrocyt | LYN      |
| 7995 | ACAP2.1    | 1.07E-09 | -0.56028 | 0.17  | 0.387 | 2.00E-05 | Erythrocyt | ACAP2    |
| 7996 | CFLAR.3    | 1.09E-09 | -0.607   | 0.078 | 0.266 | 2.05E-05 | Erythrocyt | CFLAR    |
| 7997 | SHKBP1.2   | 1.15E-09 | -0.5457  | 0.146 | 0.354 | 2.17E-05 | Erythrocyt | SHKBP1   |
| 7998 | GABARAP..  | 1.19E-09 | -0.60507 | 0.723 | 0.823 | 2.23E-05 | Erythrocyt | GABARAP  |
| 7999 | CD7.5      | 1.20E-09 | -0.82419 | 0.398 | 0.576 | 2.26E-05 | Erythrocyt | CD7      |
| 8000 | RAB8A.1    | 1.23E-09 | -0.52401 | 0.078 | 0.268 | 2.31E-05 | Erythrocyt | RAB8A    |
| 8001 | ABRACL.1   | 1.24E-09 | -0.48397 | 0.32  | 0.556 | 2.32E-05 | Erythrocyt | ABRACL   |
| 8002 | SYTL1.3    | 1.26E-09 | -0.51576 | 0.214 | 0.438 | 2.37E-05 | Erythrocyt | SYTL1    |
| 8003 | CCT3.1     | 1.29E-09 | -0.53691 | 0.277 | 0.491 | 2.42E-05 | Erythrocyt | CCT3     |
| 8004 | TCIRG1.2   | 1.30E-09 | -0.64378 | 0.073 | 0.255 | 2.44E-05 | Erythrocyt | TCIRG1   |
| 8005 | ALOX5AP.4  | 1.31E-09 | -0.73545 | 0.155 | 0.362 | 2.46E-05 | Erythrocyt | ALOX5AP  |
| 8006 | POLD4.3    | 1.33E-09 | -0.52134 | 0.325 | 0.55  | 2.49E-05 | Erythrocyt | POLD4    |
| 8007 | PSMA6.3    | 1.35E-09 | -0.53737 | 0.194 | 0.402 | 2.54E-05 | Erythrocyt | PSMA6    |
| 8008 | LTA4H.3    | 1.37E-09 | -0.64051 | 0.15  | 0.35  | 2.57E-05 | Erythrocyt | LTA4H    |
| 8009 | PPP1CC.2   | 1.40E-09 | -0.45148 | 0.218 | 0.446 | 2.64E-05 | Erythrocyt | PPP1CC   |
| 8010 | ADRM1.1    | 1.42E-09 | -0.54385 | 0.16  | 0.359 | 2.66E-05 | Erythrocyt | ADRM1    |
| 8011 | CD3E.4     | 1.43E-09 | -0.68515 | 0.413 | 0.599 | 2.68E-05 | Erythrocyt | CD3E     |
| 8012 | MBNL1.2    | 1.49E-09 | -0.54406 | 0.262 | 0.477 | 2.79E-05 | Erythrocyt | MBNL1    |
| 8013 | NOL7.1     | 1.51E-09 | -0.50042 | 0.194 | 0.417 | 2.84E-05 | Erythrocyt | NOL7     |
| 8014 | NT5C.4     | 1.51E-09 | -0.58857 | 0.17  | 0.378 | 2.84E-05 | Erythrocyt | NT5C     |
| 8015 | RABAC1.2   | 1.53E-09 | -0.51245 | 0.248 | 0.471 | 2.87E-05 | Erythrocyt | RABAC1   |
| 8016 | UQCRFS1.1  | 1.55E-09 | -0.49914 | 0.262 | 0.479 | 2.91E-05 | Erythrocyt | UQCRFS1  |
| 8017 | XRN2       | 1.59E-09 | -0.49994 | 0.15  | 0.363 | 2.98E-05 | Erythrocyt | XRN2     |
| 8018 | UQCRC2.1   | 1.60E-09 | -0.52495 | 0.146 | 0.353 | 3.00E-05 | Erythrocyt | UQCRC2   |
| 8019 | BUB3.1     | 1.63E-09 | -0.48451 | 0.223 | 0.448 | 3.05E-05 | Erythrocyt | BUB3     |
| 8020 | MRPL52.2   | 1.67E-09 | -0.51881 | 0.204 | 0.411 | 3.14E-05 | Erythrocyt | MRPL52   |
| 8021 | DGUOK.1    | 1.69E-09 | -0.5084  | 0.199 | 0.412 | 3.17E-05 | Erythrocyt | DGUOK    |
| 8022 | KIAA1551.. | 1.77E-09 | -0.5897  | 0.087 | 0.278 | 3.33E-05 | Erythrocyt | KIAA1551 |
| 8023 | IMP3.1     | 1.90E-09 | -0.41687 | 0.252 | 0.478 | 3.56E-05 | Erythrocyt | IMP3     |
| 8024 | RBM8A      | 1.97E-09 | -0.40013 | 0.223 | 0.451 | 3.71E-05 | Erythrocyt | RBM8A    |
| 8025 | PDCD5.2    | 1.98E-09 | -0.54349 | 0.146 | 0.348 | 3.71E-05 | Erythrocyt | PDCD5    |
| 8026 | STK17B.2   | 1.99E-09 | -0.50473 | 0.16  | 0.38  | 3.73E-05 | Erythrocyt | STK17B   |
| 8027 | RPL31.3    | 2.03E-09 | -0.35781 | 0.646 | 0.878 | 3.81E-05 | Erythrocyt | RPL31    |
| 8028 | RAB2A.1    | 2.04E-09 | -0.54074 | 0.126 | 0.325 | 3.83E-05 | Erythrocyt | RAB2A    |
| 8029 | CD48.3     | 2.05E-09 | -0.54057 | 0.199 | 0.416 | 3.85E-05 | Erythrocyt | CD48     |
| 8030 | C1orf162.3 | 2.22E-09 | -0.70161 | 0.18  | 0.368 | 4.17E-05 | Erythrocyt | C1orf162 |
| 8031 | ERH.1      | 2.27E-09 | -0.43363 | 0.306 | 0.54  | 4.27E-05 | Erythrocyt | ERH      |
| 8032 | TESC.2     | 2.30E-09 | 0.465995 | 0.209 | 0.091 | 4.32E-05 | Erythrocyt | TESC     |
| 8033 | NDUFA1.3   | 2.34E-09 | -0.42792 | 0.403 | 0.623 | 4.40E-05 | Erythrocyt | NDUFA1   |
| 8034 | TIMM17B.   | 2.39E-09 | -0.50357 | 0.092 | 0.284 | 4.48E-05 | Erythrocyt | TIMM17B  |
| 8035 | PPP4C.1    | 2.43E-09 | -0.46754 | 0.194 | 0.424 | 4.56E-05 | Erythrocyt | PPP4C    |
| 8036 | CNOT7.2    | 2.44E-09 | -0.53025 | 0.165 | 0.364 | 4.59E-05 | Erythrocyt | CNOT7    |
| 8037 | NOP10.1    | 2.54E-09 | -0.44255 | 0.316 | 0.539 | 4.77E-05 | Erythrocyt | NOP10    |
| 8038 | LCK.4      | 2.64E-09 | -0.60982 | 0.34  | 0.559 | 4.95E-05 | Erythrocyt | LCK      |



|      |           |          |          |       |       |          |            |          |
|------|-----------|----------|----------|-------|-------|----------|------------|----------|
| 8039 | CDK2AP2.2 | 2.71E-09 | -0.60143 | 0.126 | 0.323 | 5.10E-05 | Erythrocyt | CDK2AP2  |
| 8040 | MYO1F.4   | 2.74E-09 | -0.67294 | 0.015 | 0.171 | 5.14E-05 | Erythrocyt | MYO1F    |
| 8041 | SELENOT.1 | 2.74E-09 | -0.54427 | 0.17  | 0.373 | 5.14E-05 | Erythrocyt | SELENOT  |
| 8042 | ATP6V0D1  | 2.75E-09 | -0.55759 | 0.126 | 0.321 | 5.17E-05 | Erythrocyt | ATP6V0D1 |
| 8043 | EIF3M.1   | 2.79E-09 | -0.47105 | 0.301 | 0.529 | 5.23E-05 | Erythrocyt | EIF3M    |
| 8044 | CD46.1    | 2.79E-09 | -0.562   | 0.083 | 0.265 | 5.24E-05 | Erythrocyt | CD46     |
| 8045 | MTMR14.2  | 2.83E-09 | -0.50609 | 0.058 | 0.236 | 5.31E-05 | Erythrocyt | MTMR14   |
| 8046 | NEAT1.3   | 2.90E-09 | -1.02398 | 0.131 | 0.326 | 5.45E-05 | Erythrocyt | NEAT1    |
| 8047 | SNX2.2    | 2.99E-09 | -0.57907 | 0.214 | 0.424 | 5.62E-05 | Erythrocyt | SNX2     |
| 8048 | SPCS2.2   | 3.00E-09 | -0.55277 | 0.214 | 0.42  | 5.64E-05 | Erythrocyt | SPCS2    |
| 8049 | BSG.2     | 3.07E-09 | 1.014578 | 0.539 | 0.436 | 5.77E-05 | Erythrocyt | BSG      |
| 8050 | MTDH.2    | 3.11E-09 | -0.47552 | 0.218 | 0.437 | 5.85E-05 | Erythrocyt | MTDH     |
| 8051 | KRTCAP2.1 | 3.13E-09 | -0.46287 | 0.374 | 0.602 | 5.87E-05 | Erythrocyt | KRTCAP2  |
| 8052 | KRAS.1    | 3.13E-09 | -0.48246 | 0.083 | 0.272 | 5.89E-05 | Erythrocyt | KRAS     |
| 8053 | CANX.3    | 3.15E-09 | -0.5772  | 0.112 | 0.299 | 5.92E-05 | Erythrocyt | CANX     |
| 8054 | BST2.3    | 3.26E-09 | -0.48066 | 0.218 | 0.44  | 6.13E-05 | Erythrocyt | BST2     |
| 8055 | AKAP13.2  | 3.27E-09 | -0.57226 | 0.112 | 0.3   | 6.13E-05 | Erythrocyt | AKAP13   |
| 8056 | ZFAS1.2   | 3.27E-09 | -0.45356 | 0.33  | 0.585 | 6.14E-05 | Erythrocyt | ZFAS1    |
| 8057 | NOSIP.5   | 3.34E-09 | -0.46931 | 0.388 | 0.635 | 6.28E-05 | Erythrocyt | NOSIP    |
| 8058 | VCP.2     | 3.35E-09 | -0.50106 | 0.194 | 0.405 | 6.29E-05 | Erythrocyt | VCP      |
| 8059 | SSB.2     | 3.39E-09 | -0.50082 | 0.199 | 0.405 | 6.36E-05 | Erythrocyt | SSB      |
| 8060 | COPZ1.1   | 3.43E-09 | -0.571   | 0.131 | 0.319 | 6.44E-05 | Erythrocyt | COPZ1    |
| 8061 | SMDT1.3   | 3.43E-09 | -0.40371 | 0.432 | 0.682 | 6.44E-05 | Erythrocyt | SMDT1    |
| 8062 | TBCB.1    | 3.43E-09 | -0.56917 | 0.228 | 0.427 | 6.45E-05 | Erythrocyt | TBCB     |
| 8063 | COPS9.2   | 3.46E-09 | -0.47884 | 0.175 | 0.388 | 6.50E-05 | Erythrocyt | COPS9    |
| 8064 | LUC7L3.2  | 3.58E-09 | -0.47057 | 0.189 | 0.401 | 6.72E-05 | Erythrocyt | LUC7L3   |
| 8065 | YWHAE.3   | 3.61E-09 | -0.52454 | 0.083 | 0.264 | 6.77E-05 | Erythrocyt | YWHAE    |
| 8066 | GIMAP4.4  | 3.73E-09 | -0.53844 | 0.335 | 0.57  | 7.00E-05 | Erythrocyt | GIMAP4   |
| 8067 | DECR1     | 3.77E-09 | -0.52306 | 0.131 | 0.331 | 7.09E-05 | Erythrocyt | DECR1    |
| 8068 | TMEM230.  | 3.82E-09 | -0.48593 | 0.194 | 0.399 | 7.17E-05 | Erythrocyt | TMEM230  |
| 8069 | PLP2.2    | 3.96E-09 | -0.6453  | 0.18  | 0.373 | 7.44E-05 | Erythrocyt | PLP2     |
| 8070 | TSTD1.3   | 4.01E-09 | -0.56511 | 0.311 | 0.524 | 7.53E-05 | Erythrocyt | TSTD1    |
| 8071 | RBBP4.2   | 4.18E-09 | -0.47785 | 0.146 | 0.342 | 7.85E-05 | Erythrocyt | RBBP4    |
| 8072 | WIPF1.3   | 4.20E-09 | -0.50553 | 0.107 | 0.299 | 7.90E-05 | Erythrocyt | WIPF1    |
| 8073 | CSK.4     | 4.26E-09 | -0.51158 | 0.282 | 0.502 | 8.01E-05 | Erythrocyt | CSK      |
| 8074 | ATP5MF.3  | 4.30E-09 | -0.34901 | 0.422 | 0.637 | 8.09E-05 | Erythrocyt | ATP5MF   |
| 8075 | PARP1.4   | 4.31E-09 | -0.5899  | 0.155 | 0.347 | 8.11E-05 | Erythrocyt | PARP1    |
| 8076 | PRPF40A   | 4.32E-09 | -0.50933 | 0.112 | 0.298 | 8.11E-05 | Erythrocyt | PRPF40A  |
| 8077 | CD247.5   | 4.44E-09 | -0.7925  | 0.189 | 0.385 | 8.35E-05 | Erythrocyt | CD247    |
| 8078 | SCAMP2    | 4.46E-09 | -0.50561 | 0.141 | 0.342 | 8.38E-05 | Erythrocyt | SCAMP2   |
| 8079 | RPL34.4   | 4.49E-09 | -0.39101 | 0.757 | 0.996 | 8.44E-05 | Erythrocyt | RPL34    |
| 8080 | EIF2AK1   | 4.55E-09 | 0.484716 | 0.301 | 0.16  | 8.55E-05 | Erythrocyt | EIF2AK1  |
| 8081 | SNU13.2   | 4.57E-09 | -0.4612  | 0.311 | 0.554 | 8.58E-05 | Erythrocyt | SNU13    |
| 8082 | PDCD4.2   | 4.61E-09 | -0.55048 | 0.189 | 0.397 | 8.66E-05 | Erythrocyt | PDCD4    |
| 8083 | RNF181.1  | 4.67E-09 | -0.51975 | 0.155 | 0.354 | 8.77E-05 | Erythrocyt | RNF181   |
| 8084 | PSMB1.1   | 4.80E-09 | -0.43323 | 0.306 | 0.559 | 9.02E-05 | Erythrocyt | PSMB1    |
| 8085 | PSMC5     | 4.99E-09 | -0.53102 | 0.233 | 0.436 | 9.37E-05 | Erythrocyt | PSMC5    |

|      |           |          |          |       |       |          |            |          |
|------|-----------|----------|----------|-------|-------|----------|------------|----------|
| 8086 | FLI1.1    | 5.08E-09 | -0.52677 | 0.092 | 0.279 | 9.53E-05 | Erythrocyt | FLI1     |
| 8087 | TMEM219   | 5.09E-09 | -0.53072 | 0.194 | 0.398 | 9.56E-05 | Erythrocyt | TMEM219  |
| 8088 | PRDX1.3   | 5.13E-09 | -0.5401  | 0.335 | 0.539 | 9.63E-05 | Erythrocyt | PRDX1    |
| 8089 | PRKAR1A.2 | 5.13E-09 | -0.56041 | 0.126 | 0.318 | 9.64E-05 | Erythrocyt | PRKAR1A  |
| 8090 | ADH5.1    | 5.14E-09 | -0.53779 | 0.155 | 0.343 | 9.65E-05 | Erythrocyt | ADH5     |
| 8091 | LENG8.1   | 5.34E-09 | -0.5218  | 0.039 | 0.205 | 0.0001   | Erythrocyt | LENG8    |
| 8092 | SYK.3     | 5.39E-09 | -0.6213  | 0.024 | 0.181 | 0.000101 | Erythrocyt | SYK      |
| 8093 | IL16.3    | 5.39E-09 | -0.41385 | 0.311 | 0.533 | 0.000101 | Erythrocyt | IL16     |
| 8094 | RBM25     | 5.45E-09 | -0.53751 | 0.141 | 0.334 | 0.000102 | Erythrocyt | RBM25    |
| 8095 | LAT.4     | 5.56E-09 | -0.68178 | 0.233 | 0.425 | 0.000104 | Erythrocyt | LAT      |
| 8096 | RNF7.1    | 5.57E-09 | -0.47827 | 0.199 | 0.41  | 0.000105 | Erythrocyt | RNF7     |
| 8097 | MEA1      | 5.62E-09 | -0.50084 | 0.126 | 0.318 | 0.000106 | Erythrocyt | MEA1     |
| 8098 | ZNF706.1  | 5.63E-09 | -0.49628 | 0.301 | 0.511 | 0.000106 | Erythrocyt | ZNF706   |
| 8099 | TMEM123   | 5.82E-09 | -0.54149 | 0.257 | 0.462 | 0.000109 | Erythrocyt | TMEM123  |
| 8100 | LAMTOR1   | 5.87E-09 | -0.54483 | 0.248 | 0.447 | 0.00011  | Erythrocyt | LAMTOR1  |
| 8101 | RNF167.3  | 6.00E-09 | -0.51275 | 0.16  | 0.358 | 0.000113 | Erythrocyt | RNF167   |
| 8102 | TYROBP.3  | 6.00E-09 | -1.85048 | 0.044 | 0.204 | 0.000113 | Erythrocyt | TYROBP   |
| 8103 | SUN2.3    | 6.10E-09 | -0.58441 | 0.107 | 0.287 | 0.000115 | Erythrocyt | SUN2     |
| 8104 | HM13.3    | 6.22E-09 | -0.53985 | 0.126 | 0.316 | 0.000117 | Erythrocyt | HM13     |
| 8105 | UBXN4.1   | 6.34E-09 | -0.51422 | 0.218 | 0.42  | 0.000119 | Erythrocyt | UBXN4    |
| 8106 | HNRNPH3   | 6.43E-09 | -0.53042 | 0.189 | 0.392 | 0.000121 | Erythrocyt | HNRNPH3  |
| 8107 | TMEM160   | 6.47E-09 | -0.47579 | 0.146 | 0.343 | 0.000122 | Erythrocyt | TMEM160  |
| 8108 | NPTN.2    | 6.58E-09 | -0.52476 | 0.039 | 0.201 | 0.000124 | Erythrocyt | NPTN     |
| 8109 | NDUFB5.1  | 6.66E-09 | -0.46372 | 0.15  | 0.353 | 0.000125 | Erythrocyt | NDUFB5   |
| 8110 | CAPN2.4   | 6.67E-09 | -0.54812 | 0.039 | 0.201 | 0.000125 | Erythrocyt | CAPN2    |
| 8111 | MINOS1.2  | 6.81E-09 | -0.44355 | 0.184 | 0.39  | 0.000128 | Erythrocyt | MINOS1   |
| 8112 | VAMP5.3   | 6.91E-09 | -0.5845  | 0.107 | 0.298 | 0.00013  | Erythrocyt | VAMP5    |
| 8113 | MCL1.3    | 6.94E-09 | -0.56438 | 0.155 | 0.354 | 0.00013  | Erythrocyt | MCL1     |
| 8114 | MDH1.1    | 6.96E-09 | -0.49168 | 0.218 | 0.411 | 0.000131 | Erythrocyt | MDH1     |
| 8115 | RPL37A.2  | 7.12E-09 | -0.38483 | 0.587 | 0.838 | 0.000134 | Erythrocyt | RPL37A   |
| 8116 | MPG.2     | 7.16E-09 | -0.4781  | 0.102 | 0.292 | 0.000135 | Erythrocyt | MPG      |
| 8117 | CCT2.2    | 7.21E-09 | -0.49023 | 0.189 | 0.392 | 0.000135 | Erythrocyt | CCT2     |
| 8118 | GIMAP7.4  | 7.49E-09 | -0.58547 | 0.417 | 0.627 | 0.000141 | Erythrocyt | GIMAP7   |
| 8119 | TPT1.4    | 7.52E-09 | -0.2553  | 0.956 | 0.995 | 0.000141 | Erythrocyt | TPT1     |
| 8120 | ATP5MC1   | 7.77E-09 | -0.47579 | 0.214 | 0.42  | 0.000146 | Erythrocyt | ATP5MC1  |
| 8121 | REEP5.5   | 7.89E-09 | -0.55442 | 0.136 | 0.328 | 0.000148 | Erythrocyt | REEP5    |
| 8122 | POLR2E    | 8.16E-09 | -0.49218 | 0.16  | 0.359 | 0.000153 | Erythrocyt | POLR2E   |
| 8123 | ITGB7.5   | 8.22E-09 | -0.60389 | 0.078 | 0.25  | 0.000154 | Erythrocyt | ITGB7    |
| 8124 | RASSF5.3  | 9.11E-09 | -0.54383 | 0.121 | 0.307 | 0.000171 | Erythrocyt | RASSF5   |
| 8125 | AIP       | 9.57E-09 | -0.50255 | 0.209 | 0.413 | 0.00018  | Erythrocyt | AIP      |
| 8126 | MMADHC    | 9.67E-09 | -0.51681 | 0.146 | 0.334 | 0.000182 | Erythrocyt | MMADHC   |
| 8127 | CASP4.1   | 9.72E-09 | -0.4595  | 0.107 | 0.293 | 0.000183 | Erythrocyt | CASP4    |
| 8128 | TGFB1.4   | 9.76E-09 | -0.57928 | 0.107 | 0.287 | 0.000183 | Erythrocyt | TGFB1    |
| 8129 | NDUFV2.1  | 1.01E-08 | -0.43645 | 0.262 | 0.476 | 0.00019  | Erythrocyt | NDUFV2   |
| 8130 | RAB24.2   | 1.01E-08 | -0.52539 | 0.087 | 0.271 | 0.00019  | Erythrocyt | RAB24    |
| 8131 | FNBP1.1   | 1.02E-08 | -0.55578 | 0.087 | 0.26  | 0.000192 | Erythrocyt | FNBP1    |
| 8132 | HLA-DPB1  | 1.03E-08 | -0.99317 | 0.262 | 0.455 | 0.000194 | Erythrocyt | HLA-DPB1 |

|      |            |          |          |       |       |          |            |          |
|------|------------|----------|----------|-------|-------|----------|------------|----------|
| 8133 | UQCRC1.2   | 1.04E-08 | -0.45693 | 0.131 | 0.327 | 0.000195 | Erythrocyt | UQCRC1   |
| 8134 | ATP5MPL.   | 1.08E-08 | -0.42667 | 0.311 | 0.536 | 0.000203 | Erythrocyt | ATP5MPL  |
| 8135 | UBE2J1.3   | 1.09E-08 | -0.63244 | 0.083 | 0.257 | 0.000205 | Erythrocyt | UBE2J1   |
| 8136 | APOBEC3G   | 1.10E-08 | -0.60001 | 0.053 | 0.221 | 0.000206 | Erythrocyt | APOBEC3G |
| 8137 | BIN1.3     | 1.10E-08 | -0.51879 | 0.267 | 0.472 | 0.000207 | Erythrocyt | BIN1     |
| 8138 | ILK.3      | 1.12E-08 | -0.51116 | 0.083 | 0.26  | 0.000211 | Erythrocyt | ILK      |
| 8139 | WDR83OS.   | 1.14E-08 | -0.41038 | 0.379 | 0.6   | 0.000213 | Erythrocyt | WDR83OS  |
| 8140 | IFI27L2.3  | 1.15E-08 | -0.50637 | 0.053 | 0.219 | 0.000215 | Erythrocyt | IFI27L2  |
| 8141 | MRPL51.1   | 1.15E-08 | -0.38621 | 0.155 | 0.369 | 0.000216 | Erythrocyt | MRPL51   |
| 8142 | LYPLA1     | 1.19E-08 | -0.53264 | 0.117 | 0.297 | 0.000224 | Erythrocyt | LYPLA1   |
| 8143 | MED4.1     | 1.20E-08 | -0.50045 | 0.078 | 0.25  | 0.000226 | Erythrocyt | MED4     |
| 8144 | RASGRP2.4  | 1.23E-08 | -0.49841 | 0.32  | 0.526 | 0.000231 | Erythrocyt | RASGRP2  |
| 8145 | POMP.3     | 1.28E-08 | -0.48796 | 0.257 | 0.464 | 0.00024  | Erythrocyt | POMP     |
| 8146 | RSL1D1.3   | 1.30E-08 | -0.43666 | 0.33  | 0.556 | 0.000243 | Erythrocyt | RSL1D1   |
| 8147 | PRKCB.4    | 1.30E-08 | -0.49825 | 0.034 | 0.193 | 0.000245 | Erythrocyt | PRKCB    |
| 8148 | SF3A1.2    | 1.32E-08 | -0.49818 | 0.112 | 0.297 | 0.000247 | Erythrocyt | SF3A1    |
| 8149 | UBE3A      | 1.32E-08 | -0.49275 | 0.049 | 0.212 | 0.000248 | Erythrocyt | UBE3A    |
| 8150 | KIF2A.3    | 1.34E-08 | -0.5126  | 0.126 | 0.311 | 0.000251 | Erythrocyt | KIF2A    |
| 8151 | H2AFY.2    | 1.36E-08 | -0.56369 | 0.146 | 0.326 | 0.000255 | Erythrocyt | H2AFY    |
| 8152 | MFSD10.1   | 1.37E-08 | -0.52491 | 0.107 | 0.285 | 0.000257 | Erythrocyt | MFSD10   |
| 8153 | SSR3.3     | 1.39E-08 | -0.60189 | 0.112 | 0.284 | 0.000262 | Erythrocyt | SSR3     |
| 8154 | MESD.1     | 1.40E-08 | -0.48349 | 0.068 | 0.241 | 0.000262 | Erythrocyt | MESD     |
| 8155 | SERF2.3    | 1.42E-08 | -0.27852 | 0.981 | 0.987 | 0.000267 | Erythrocyt | SERF2    |
| 8156 | DOK2.5     | 1.49E-08 | -0.58828 | 0.058 | 0.222 | 0.00028  | Erythrocyt | DOK2     |
| 8157 | RPL17.3    | 1.50E-08 | -0.34204 | 0.456 | 0.714 | 0.000282 | Erythrocyt | RPL17    |
| 8158 | TYMP.4     | 1.51E-08 | -1.04035 | 0.053 | 0.213 | 0.000284 | Erythrocyt | TYMP     |
| 8159 | SLC38A1.2  | 1.55E-08 | -0.51015 | 0.112 | 0.296 | 0.00029  | Erythrocyt | SLC38A1  |
| 8160 | FAM32A.1   | 1.59E-08 | -0.3761  | 0.112 | 0.301 | 0.000299 | Erythrocyt | FAM32A   |
| 8161 | PPIG.1     | 1.60E-08 | -0.51244 | 0.189 | 0.381 | 0.000301 | Erythrocyt | PPIG     |
| 8162 | RRP7A      | 1.60E-08 | -0.4623  | 0.058 | 0.226 | 0.000301 | Erythrocyt | RRP7A    |
| 8163 | EIF4H      | 1.60E-08 | -0.50362 | 0.18  | 0.374 | 0.000301 | Erythrocyt | EIF4H    |
| 8164 | RPL21.2    | 1.61E-08 | -0.31467 | 0.888 | 0.969 | 0.000303 | Erythrocyt | RPL21    |
| 8165 | GTF2A2     | 1.63E-08 | -0.50139 | 0.18  | 0.368 | 0.000306 | Erythrocyt | GTF2A2   |
| 8166 | NDUF55.3   | 1.64E-08 | -0.37323 | 0.335 | 0.55  | 0.000308 | Erythrocyt | NDUF55   |
| 8167 | PSMF1      | 1.67E-08 | 0.520812 | 0.49  | 0.338 | 0.000313 | Erythrocyt | PSMF1    |
| 8168 | WASHC4.3   | 1.67E-08 | -0.51005 | 0.039 | 0.2   | 0.000314 | Erythrocyt | WASHC4   |
| 8169 | KIF5B      | 1.68E-08 | -0.50632 | 0.087 | 0.263 | 0.000316 | Erythrocyt | KIF5B    |
| 8170 | DCXR.2     | 1.72E-08 | -0.4827  | 0.214 | 0.418 | 0.000324 | Erythrocyt | DCXR     |
| 8171 | PLAC8.2    | 1.76E-08 | -0.52804 | 0.311 | 0.513 | 0.00033  | Erythrocyt | PLAC8    |
| 8172 | DCTN3.2    | 1.77E-08 | -0.4569  | 0.17  | 0.367 | 0.000332 | Erythrocyt | DCTN3    |
| 8173 | GNG2.3     | 1.79E-08 | -0.56008 | 0.092 | 0.266 | 0.000337 | Erythrocyt | GNG2     |
| 8174 | LPXN.2     | 1.81E-08 | -0.50112 | 0.053 | 0.213 | 0.00034  | Erythrocyt | LPXN     |
| 8175 | CNDP2      | 1.81E-08 | -0.48269 | 0.049 | 0.209 | 0.000341 | Erythrocyt | CNDP2    |
| 8176 | OS9.2      | 1.83E-08 | -0.49147 | 0.078 | 0.247 | 0.000344 | Erythrocyt | OS9      |
| 8177 | RAB14.1    | 1.84E-08 | -0.49394 | 0.102 | 0.279 | 0.000346 | Erythrocyt | RAB14    |
| 8178 | LST1.5     | 1.88E-08 | -1.26299 | 0.024 | 0.17  | 0.000354 | Erythrocyt | LST1     |
| 8179 | C19orf66.2 | 1.93E-08 | -0.49632 | 0.126 | 0.313 | 0.000363 | Erythrocyt | C19orf66 |

|      |           |          |          |       |       |          |            |           |
|------|-----------|----------|----------|-------|-------|----------|------------|-----------|
| 8180 | NDUFA11.1 | 1.95E-08 | -0.48764 | 0.252 | 0.461 | 0.000365 | Erythrocyt | NDUFA11   |
| 8181 | RAB7A.1   | 1.96E-08 | -0.46831 | 0.228 | 0.434 | 0.000369 | Erythrocyt | RAB7A     |
| 8182 | SRSF1.2   | 2.00E-08 | -0.46065 | 0.112 | 0.294 | 0.000376 | Erythrocyt | SRSF1     |
| 8183 | HMOX2.3   | 2.02E-08 | -0.49527 | 0.194 | 0.396 | 0.00038  | Erythrocyt | HMOX2     |
| 8184 | IFITM1.4  | 2.05E-08 | -0.47097 | 0.592 | 0.804 | 0.000384 | Erythrocyt | IFITM1    |
| 8185 | PAIP2.1   | 2.11E-08 | -0.35761 | 0.335 | 0.559 | 0.000397 | Erythrocyt | PAIP2     |
| 8186 | LAIR1.2   | 2.12E-08 | -0.55907 | 0.053 | 0.214 | 0.000398 | Erythrocyt | LAIR1     |
| 8187 | CAPG.4    | 2.15E-08 | -0.70435 | 0.053 | 0.212 | 0.000404 | Erythrocyt | CAPG      |
| 8188 | CCDC12.2  | 2.16E-08 | -0.47067 | 0.107 | 0.292 | 0.000407 | Erythrocyt | CCDC12    |
| 8189 | CUTA.2    | 2.22E-08 | -0.36402 | 0.354 | 0.592 | 0.000417 | Erythrocyt | CUTA      |
| 8190 | SCP2.2    | 2.24E-08 | -0.44919 | 0.141 | 0.337 | 0.00042  | Erythrocyt | SCP2      |
| 8191 | EIF4A2.2  | 2.25E-08 | -0.46355 | 0.311 | 0.534 | 0.000422 | Erythrocyt | EIF4A2    |
| 8192 | RWDD1.1   | 2.29E-08 | -0.48289 | 0.204 | 0.397 | 0.00043  | Erythrocyt | RWDD1     |
| 8193 | HADHA.2   | 2.30E-08 | -0.48162 | 0.228 | 0.428 | 0.000432 | Erythrocyt | HADHA     |
| 8194 | SH3KBP1.2 | 2.30E-08 | -0.52075 | 0.107 | 0.281 | 0.000432 | Erythrocyt | SH3KBP1   |
| 8195 | PTP4A2.2  | 2.40E-08 | -0.53363 | 0.126 | 0.312 | 0.000451 | Erythrocyt | PTP4A2    |
| 8196 | PDCD6     | 2.41E-08 | -0.41456 | 0.286 | 0.494 | 0.000453 | Erythrocyt | PDCD6     |
| 8197 | SEC31A    | 2.50E-08 | -0.47229 | 0.044 | 0.201 | 0.00047  | Erythrocyt | SEC31A    |
| 8198 | MOB1A.1   | 2.50E-08 | -0.43646 | 0.136 | 0.324 | 0.00047  | Erythrocyt | MOB1A     |
| 8199 | HP1BP3    | 2.56E-08 | -0.46376 | 0.223 | 0.428 | 0.000481 | Erythrocyt | HP1BP3    |
| 8200 | MYDGF.2   | 2.64E-08 | -0.61101 | 0.131 | 0.298 | 0.000496 | Erythrocyt | MYDGF     |
| 8201 | GLRX3     | 2.65E-08 | -0.46258 | 0.044 | 0.199 | 0.000497 | Erythrocyt | GLRX3     |
| 8202 | SP100.4   | 2.67E-08 | -0.52432 | 0.282 | 0.474 | 0.000501 | Erythrocyt | SP100     |
| 8203 | GABARAPL  | 2.72E-08 | 0.595669 | 0.636 | 0.535 | 0.00051  | Erythrocyt | GABARAPL2 |
| 8204 | ALOX5.4   | 2.75E-08 | -0.62334 | 0.029 | 0.178 | 0.000516 | Erythrocyt | ALOX5     |
| 8205 | ATP1A1.2  | 2.81E-08 | -0.48702 | 0.107 | 0.285 | 0.000527 | Erythrocyt | ATP1A1    |
| 8206 | IRF2.1    | 2.82E-08 | -0.51706 | 0.121 | 0.299 | 0.000529 | Erythrocyt | IRF2      |
| 8207 | ARHGAP17  | 2.85E-08 | -0.52315 | 0.024 | 0.169 | 0.000535 | Erythrocyt | ARHGAP17  |
| 8208 | TUFM.2    | 2.88E-08 | -0.44611 | 0.282 | 0.489 | 0.000541 | Erythrocyt | TUFM      |
| 8209 | ARHGAP3C  | 2.91E-08 | -0.49583 | 0.136 | 0.314 | 0.000546 | Erythrocyt | ARHGAP30  |
| 8210 | VPS29.1   | 2.97E-08 | -0.47652 | 0.15  | 0.345 | 0.000557 | Erythrocyt | VPS29     |
| 8211 | UBE2N.1   | 3.02E-08 | -0.44547 | 0.194 | 0.403 | 0.000567 | Erythrocyt | UBE2N     |
| 8212 | TSC22D4.1 | 3.12E-08 | -0.46142 | 0.146 | 0.336 | 0.000587 | Erythrocyt | TSC22D4   |
| 8213 | PSMB2.2   | 3.18E-08 | -0.50186 | 0.15  | 0.332 | 0.000597 | Erythrocyt | PSMB2     |
| 8214 | GRSF1.1   | 3.19E-08 | -0.45116 | 0.131 | 0.314 | 0.0006   | Erythrocyt | GRSF1     |
| 8215 | MRPS34.1  | 3.22E-08 | -0.38439 | 0.209 | 0.42  | 0.000604 | Erythrocyt | MRPS34    |
| 8216 | CAPZA2.3  | 3.26E-08 | -0.47882 | 0.155 | 0.349 | 0.000612 | Erythrocyt | CAPZA2    |
| 8217 | DCTN2.1   | 3.35E-08 | -0.41849 | 0.087 | 0.262 | 0.000629 | Erythrocyt | DCTN2     |
| 8218 | POLR3GL.3 | 3.39E-08 | -0.44956 | 0.097 | 0.276 | 0.000637 | Erythrocyt | POLR3GL   |
| 8219 | SSRP1.1   | 3.42E-08 | -0.46251 | 0.058 | 0.216 | 0.000642 | Erythrocyt | SSRP1     |
| 8220 | MDH2.2    | 3.46E-08 | -0.44571 | 0.252 | 0.458 | 0.00065  | Erythrocyt | MDH2      |
| 8221 | PHB.2     | 3.46E-08 | -0.43915 | 0.17  | 0.361 | 0.00065  | Erythrocyt | PHB       |
| 8222 | ANP32A.1  | 3.55E-08 | -0.48239 | 0.286 | 0.472 | 0.000667 | Erythrocyt | ANP32A    |
| 8223 | SUPT4H1.3 | 3.62E-08 | -0.52885 | 0.15  | 0.334 | 0.000681 | Erythrocyt | SUPT4H1   |
| 8224 | TMED9.3   | 3.62E-08 | -0.50068 | 0.146 | 0.33  | 0.000681 | Erythrocyt | TMED9     |
| 8225 | CARD16.3  | 3.64E-08 | -0.50552 | 0.199 | 0.392 | 0.000684 | Erythrocyt | CARD16    |
| 8226 | PYURF.3   | 3.65E-08 | -0.44119 | 0.228 | 0.432 | 0.000686 | Erythrocyt | PYURF     |

|      |           |          |          |       |       |          |            |          |
|------|-----------|----------|----------|-------|-------|----------|------------|----------|
| 8227 | WSB1.1    | 3.70E-08 | -0.39996 | 0.141 | 0.331 | 0.000695 | Erythrocyt | WSB1     |
| 8228 | HERPUD1.  | 3.70E-08 | -0.5917  | 0.165 | 0.355 | 0.000696 | Erythrocyt | HERPUD1  |
| 8229 | FBXL5.1   | 3.73E-08 | -0.52343 | 0.083 | 0.248 | 0.0007   | Erythrocyt | FBXL5    |
| 8230 | AATF      | 3.73E-08 | -0.44789 | 0.073 | 0.238 | 0.0007   | Erythrocyt | AATF     |
| 8231 | SNRPB2.1  | 3.76E-08 | -0.50402 | 0.17  | 0.35  | 0.000707 | Erythrocyt | SNRPB2   |
| 8232 | NUDCD2.1  | 3.78E-08 | -0.43815 | 0.092 | 0.265 | 0.000709 | Erythrocyt | NUDCD2   |
| 8233 | SEC11A.2  | 3.84E-08 | -0.44739 | 0.233 | 0.432 | 0.000722 | Erythrocyt | SEC11A   |
| 8234 | NPL.1     | 3.87E-08 | 0.25703  | 0.117 | 0.041 | 0.000727 | Erythrocyt | NPL      |
| 8235 | PTBP1     | 3.89E-08 | -0.45083 | 0.058 | 0.219 | 0.00073  | Erythrocyt | PTBP1    |
| 8236 | SPOCK2.4  | 3.90E-08 | -0.60849 | 0.155 | 0.328 | 0.000733 | Erythrocyt | SPOCK2   |
| 8237 | RNASEH2C  | 3.90E-08 | -0.5036  | 0.16  | 0.348 | 0.000734 | Erythrocyt | RNASEH2C |
| 8238 | THRAP3.3  | 3.91E-08 | -0.45438 | 0.223 | 0.426 | 0.000735 | Erythrocyt | THRAP3   |
| 8239 | PSMA1.1   | 3.95E-08 | -0.53797 | 0.136 | 0.307 | 0.000742 | Erythrocyt | PSMA1    |
| 8240 | FAM96B    | 3.96E-08 | -0.45318 | 0.233 | 0.444 | 0.000744 | Erythrocyt | FAM96B   |
| 8241 | SSNA1     | 3.96E-08 | -0.45754 | 0.165 | 0.356 | 0.000744 | Erythrocyt | SSNA1    |
| 8242 | SKAP1.5   | 4.01E-08 | -0.5714  | 0.18  | 0.364 | 0.000753 | Erythrocyt | SKAP1    |
| 8243 | MRPS6.1   | 4.13E-08 | -0.4167  | 0.165 | 0.37  | 0.000776 | Erythrocyt | MRPS6    |
| 8244 | SEC13.1   | 4.16E-08 | -0.46873 | 0.112 | 0.289 | 0.000782 | Erythrocyt | SEC13    |
| 8245 | GYG1.3    | 4.19E-08 | -0.49951 | 0.024 | 0.167 | 0.000788 | Erythrocyt | GYG1     |
| 8246 | ACAA1.2   | 4.30E-08 | -0.48043 | 0.112 | 0.286 | 0.000808 | Erythrocyt | ACAA1    |
| 8247 | REL.4     | 4.32E-08 | -0.56648 | 0.073 | 0.233 | 0.000812 | Erythrocyt | REL      |
| 8248 | SRSF10.1  | 4.33E-08 | -0.47038 | 0.18  | 0.364 | 0.000813 | Erythrocyt | SRSF10   |
| 8249 | HLA-DRB1. | 4.37E-08 | -0.87823 | 0.238 | 0.434 | 0.00082  | Erythrocyt | HLA-DRB1 |
| 8250 | MPHOSPH   | 4.41E-08 | -0.47148 | 0.199 | 0.384 | 0.000829 | Erythrocyt | MPHOSPH8 |
| 8251 | IL10RA.4  | 4.47E-08 | -0.55636 | 0.092 | 0.259 | 0.000841 | Erythrocyt | IL10RA   |
| 8252 | C1QBP.2   | 4.58E-08 | -0.41684 | 0.354 | 0.564 | 0.00086  | Erythrocyt | C1QBP    |
| 8253 | SCAND1.1  | 4.62E-08 | -0.45457 | 0.248 | 0.455 | 0.000868 | Erythrocyt | SCAND1   |
| 8254 | CCR7.5    | 4.63E-08 | -0.59814 | 0.335 | 0.54  | 0.00087  | Erythrocyt | CCR7     |
| 8255 | TGOLN2.2  | 4.68E-08 | -0.47287 | 0.083 | 0.249 | 0.000878 | Erythrocyt | TGOLN2   |
| 8256 | LSM3.1    | 4.69E-08 | -0.38475 | 0.141 | 0.326 | 0.000881 | Erythrocyt | LSM3     |
| 8257 | CD63.4    | 4.70E-08 | -0.75408 | 0.078 | 0.231 | 0.000882 | Erythrocyt | CD63     |
| 8258 | BUD23.2   | 4.78E-08 | -0.48428 | 0.078 | 0.242 | 0.000899 | Erythrocyt | BUD23    |
| 8259 | PIH1D1    | 4.79E-08 | -0.4654  | 0.097 | 0.268 | 0.000899 | Erythrocyt | PIH1D1   |
| 8260 | CCNL1.1   | 4.90E-08 | -0.50942 | 0.121 | 0.299 | 0.000921 | Erythrocyt | CCNL1    |
| 8261 | CPNE3.1   | 4.92E-08 | -0.45881 | 0.068 | 0.229 | 0.000925 | Erythrocyt | CPNE3    |
| 8262 | TINF2.2   | 4.93E-08 | -0.47032 | 0.097 | 0.267 | 0.000926 | Erythrocyt | TINF2    |
| 8263 | PPCS.1    | 5.29E-08 | -0.36978 | 0.131 | 0.322 | 0.000994 | Erythrocyt | PPCS     |
| 8264 | SCNM1.1   | 5.44E-08 | -0.41232 | 0.063 | 0.225 | 0.001022 | Erythrocyt | SCNM1    |
| 8265 | ANAPC5.1  | 5.53E-08 | -0.46703 | 0.146 | 0.333 | 0.001038 | Erythrocyt | ANAPC5   |
| 8266 | AP3S1     | 5.57E-08 | -0.44391 | 0.083 | 0.249 | 0.001047 | Erythrocyt | AP3S1    |
| 8267 | PSMD6     | 5.63E-08 | -0.48907 | 0.136 | 0.307 | 0.001057 | Erythrocyt | PSMD6    |
| 8268 | NUDC      | 5.72E-08 | -0.41816 | 0.146 | 0.329 | 0.001074 | Erythrocyt | NUDC     |
| 8269 | IKZF1.1   | 5.73E-08 | -0.50819 | 0.18  | 0.364 | 0.001077 | Erythrocyt | IKZF1    |
| 8270 | NUDT22    | 5.83E-08 | -0.4611  | 0.078 | 0.237 | 0.001096 | Erythrocyt | NUDT22   |
| 8271 | CTSW.5    | 5.86E-08 | -1.43267 | 0.097 | 0.254 | 0.001102 | Erythrocyt | CTSW     |
| 8272 | NEDD8.1   | 6.01E-08 | -0.37404 | 0.277 | 0.497 | 0.001128 | Erythrocyt | NEDD8    |
| 8273 | BLOC1S2.2 | 6.12E-08 | -0.48889 | 0.117 | 0.288 | 0.00115  | Erythrocyt | BLOC1S2  |

|      |            |          |          |       |       |          |            |          |
|------|------------|----------|----------|-------|-------|----------|------------|----------|
| 8274 | C12orf57.4 | 6.19E-08 | -0.35679 | 0.51  | 0.758 | 0.001162 | Erythrocyt | C12orf57 |
| 8275 | SF3B6.1    | 6.28E-08 | -0.42111 | 0.252 | 0.449 | 0.00118  | Erythrocyt | SF3B6    |
| 8276 | ECHDC1.1   | 6.32E-08 | -0.46561 | 0.073 | 0.235 | 0.001187 | Erythrocyt | ECHDC1   |
| 8277 | HIF1A.2    | 6.40E-08 | -0.5504  | 0.087 | 0.243 | 0.001203 | Erythrocyt | HIF1A    |
| 8278 | SMARCE1.   | 6.49E-08 | -0.46929 | 0.083 | 0.246 | 0.001219 | Erythrocyt | SMARCE1  |
| 8279 | PSMD9      | 6.55E-08 | -0.44565 | 0.087 | 0.252 | 0.00123  | Erythrocyt | PSMD9    |
| 8280 | UBE2A      | 6.59E-08 | -0.44785 | 0.068 | 0.223 | 0.001238 | Erythrocyt | UBE2A    |
| 8281 | POU2F2.4   | 6.62E-08 | -0.61737 | 0.078 | 0.236 | 0.001244 | Erythrocyt | POU2F2   |
| 8282 | CCT6A      | 6.73E-08 | -0.41496 | 0.165 | 0.353 | 0.001265 | Erythrocyt | CCT6A    |
| 8283 | MED10.2    | 6.78E-08 | -0.41203 | 0.175 | 0.365 | 0.001274 | Erythrocyt | MED10    |
| 8284 | TMEM134.   | 6.84E-08 | -0.44368 | 0.078 | 0.241 | 0.001286 | Erythrocyt | TMEM134  |
| 8285 | RPL36.4    | 6.94E-08 | -0.35651 | 0.728 | 0.991 | 0.001304 | Erythrocyt | RPL36    |
| 8286 | ZC3H15     | 7.03E-08 | -0.3757  | 0.194 | 0.386 | 0.001321 | Erythrocyt | ZC3H15   |
| 8287 | MPV17      | 7.05E-08 | -0.38901 | 0.034 | 0.183 | 0.001324 | Erythrocyt | MPV17    |
| 8288 | TLN1.3     | 7.08E-08 | -0.54672 | 0.078 | 0.241 | 0.00133  | Erythrocyt | TLN1     |
| 8289 | THOC3.1    | 7.10E-08 | -0.47823 | 0.097 | 0.264 | 0.001333 | Erythrocyt | THOC3    |
| 8290 | U2SURP     | 7.30E-08 | -0.44911 | 0.141 | 0.319 | 0.001371 | Erythrocyt | U2SURP   |
| 8291 | NONO.1     | 7.32E-08 | -0.52026 | 0.146 | 0.312 | 0.001376 | Erythrocyt | NONO     |
| 8292 | SLC44A2.3  | 7.34E-08 | -0.51594 | 0.16  | 0.336 | 0.001378 | Erythrocyt | SLC44A2  |
| 8293 | AGTRAP.3   | 7.39E-08 | -0.63341 | 0.073 | 0.229 | 0.001389 | Erythrocyt | AGTRAP   |
| 8294 | EMD.1      | 7.68E-08 | -0.41767 | 0.204 | 0.397 | 0.001443 | Erythrocyt | EMD      |
| 8295 | KDELRL1.2  | 7.88E-08 | -0.44293 | 0.146 | 0.324 | 0.00148  | Erythrocyt | KDELRL1  |
| 8296 | PSMD7      | 7.90E-08 | -0.47234 | 0.126 | 0.297 | 0.001484 | Erythrocyt | PSMD7    |
| 8297 | RGS14.1    | 7.92E-08 | -0.38587 | 0.102 | 0.283 | 0.001488 | Erythrocyt | RGS14    |
| 8298 | FBXW5.1    | 7.96E-08 | -0.38531 | 0.078 | 0.245 | 0.001496 | Erythrocyt | FBXW5    |
| 8299 | PSMA3.1    | 7.96E-08 | -0.49901 | 0.121 | 0.287 | 0.001496 | Erythrocyt | PSMA3    |
| 8300 | ELOC.1     | 8.01E-08 | -0.46423 | 0.16  | 0.341 | 0.001505 | Erythrocyt | ELOC     |
| 8301 | RAB5IF.2   | 8.24E-08 | -0.49039 | 0.121 | 0.292 | 0.001548 | Erythrocyt | RAB5IF   |
| 8302 | ARIH2.1    | 8.30E-08 | -0.49688 | 0.083 | 0.241 | 0.001559 | Erythrocyt | ARIH2    |
| 8303 | SMCHD1.1   | 8.35E-08 | -0.43843 | 0.194 | 0.394 | 0.001569 | Erythrocyt | SMCHD1   |
| 8304 | SNRPN.2    | 8.39E-08 | -0.4507  | 0.17  | 0.346 | 0.001577 | Erythrocyt | SNRPN    |
| 8305 | RPS27.4    | 8.44E-08 | -0.34161 | 0.791 | 0.995 | 0.001586 | Erythrocyt | RPS27    |
| 8306 | SMARCA5    | 8.58E-08 | -0.41073 | 0.044 | 0.196 | 0.001611 | Erythrocyt | SMARCA5  |
| 8307 | CMTM6.1    | 8.62E-08 | -0.48733 | 0.146 | 0.326 | 0.001619 | Erythrocyt | CMTM6    |
| 8308 | STAT3.1    | 8.62E-08 | -0.48322 | 0.121 | 0.289 | 0.00162  | Erythrocyt | STAT3    |
| 8309 | PSMG2      | 8.69E-08 | -0.46167 | 0.184 | 0.365 | 0.001633 | Erythrocyt | PSMG2    |
| 8310 | CYTIP.3    | 8.70E-08 | -0.38231 | 0.296 | 0.504 | 0.001635 | Erythrocyt | CYTIP    |
| 8311 | GPI        | 8.72E-08 | -0.41778 | 0.194 | 0.382 | 0.001638 | Erythrocyt | GPI      |
| 8312 | SF3A2.1    | 9.17E-08 | -0.48807 | 0.141 | 0.312 | 0.001722 | Erythrocyt | SF3A2    |
| 8313 | EAPP.1     | 9.19E-08 | -0.41302 | 0.121 | 0.301 | 0.001727 | Erythrocyt | EAPP     |
| 8314 | RASA3.4    | 9.22E-08 | -0.4765  | 0.053 | 0.204 | 0.001732 | Erythrocyt | RASA3    |
| 8315 | LAMTOR5.   | 9.25E-08 | -0.43692 | 0.214 | 0.396 | 0.001737 | Erythrocyt | LAMTOR5  |
| 8316 | UQCRB.2    | 9.28E-08 | -0.29683 | 0.563 | 0.768 | 0.001743 | Erythrocyt | UQCRB    |
| 8317 | GLIPR1.3   | 9.37E-08 | -0.58162 | 0.078 | 0.231 | 0.001761 | Erythrocyt | GLIPR1   |
| 8318 | RPS21.4    | 9.41E-08 | -0.33826 | 0.714 | 0.989 | 0.001768 | Erythrocyt | RPS21    |
| 8319 | DEF6.3     | 9.48E-08 | -0.45943 | 0.16  | 0.342 | 0.00178  | Erythrocyt | DEF6     |
| 8320 | CD27.5     | 9.54E-08 | -0.52695 | 0.223 | 0.421 | 0.001792 | Erythrocyt | CD27     |

|      |           |          |          |       |       |          |            |           |
|------|-----------|----------|----------|-------|-------|----------|------------|-----------|
| 8321 | IKZF3.4   | 9.58E-08 | -0.53341 | 0.024 | 0.159 | 0.001799 | Erythrocyt | IKZF3     |
| 8322 | PEBP1.3   | 9.76E-08 | -0.41205 | 0.32  | 0.523 | 0.001834 | Erythrocyt | PEBP1     |
| 8323 | COX17.2   | 1.01E-07 | -0.51907 | 0.126 | 0.3   | 0.001889 | Erythrocyt | COX17     |
| 8324 | SUCLG1.1  | 1.02E-07 | -0.42449 | 0.117 | 0.289 | 0.001914 | Erythrocyt | SUCLG1    |
| 8325 | CYCS.1    | 1.04E-07 | -0.48048 | 0.146 | 0.319 | 0.001949 | Erythrocyt | CYCS      |
| 8326 | TEX264.1  | 1.04E-07 | -0.37776 | 0.112 | 0.288 | 0.001955 | Erythrocyt | TEX264    |
| 8327 | TRIR.2    | 1.08E-07 | -0.37169 | 0.335 | 0.569 | 0.002021 | Erythrocyt | TRIR      |
| 8328 | HNRNPUL1  | 1.08E-07 | -0.47919 | 0.078 | 0.236 | 0.002028 | Erythrocyt | HNRNPUL1  |
| 8329 | IDH2.2    | 1.08E-07 | -0.47518 | 0.107 | 0.271 | 0.002032 | Erythrocyt | IDH2      |
| 8330 | TIMM8B.3  | 1.10E-07 | -0.41454 | 0.092 | 0.264 | 0.00206  | Erythrocyt | TIMM8B    |
| 8331 | MICU2     | 1.10E-07 | -0.46163 | 0.049 | 0.195 | 0.002061 | Erythrocyt | MICU2     |
| 8332 | CELF2.1   | 1.11E-07 | -0.47283 | 0.131 | 0.304 | 0.002079 | Erythrocyt | CELF2     |
| 8333 | FAAP20.1  | 1.13E-07 | -0.4181  | 0.17  | 0.361 | 0.002132 | Erythrocyt | FAAP20    |
| 8334 | LAMTOR2.  | 1.20E-07 | -0.40943 | 0.126 | 0.3   | 0.002256 | Erythrocyt | LAMTOR2   |
| 8335 | DBNL.4    | 1.23E-07 | -0.47281 | 0.199 | 0.383 | 0.002306 | Erythrocyt | DBNL      |
| 8336 | FNBP4.2   | 1.24E-07 | -0.52571 | 0.131 | 0.296 | 0.002335 | Erythrocyt | FNBP4     |
| 8337 | MRPS12    | 1.24E-07 | -0.42107 | 0.087 | 0.254 | 0.002338 | Erythrocyt | MRPS12    |
| 8338 | ITGB2-AS1 | 1.25E-07 | -0.48863 | 0.092 | 0.252 | 0.002351 | Erythrocyt | ITGB2-AS1 |
| 8339 | LAPTM4A.  | 1.30E-07 | -0.48111 | 0.199 | 0.376 | 0.002435 | Erythrocyt | LAPTM4A   |
| 8340 | BZW1.1    | 1.30E-07 | -0.43673 | 0.184 | 0.367 | 0.002444 | Erythrocyt | BZW1      |
| 8341 | SHMT2.3   | 1.32E-07 | -0.52728 | 0.126 | 0.297 | 0.002483 | Erythrocyt | SHMT2     |
| 8342 | DCAF7.1   | 1.36E-07 | -0.49044 | 0.068 | 0.215 | 0.002556 | Erythrocyt | DCAF7     |
| 8343 | PFDN2     | 1.40E-07 | -0.47204 | 0.117 | 0.282 | 0.002631 | Erythrocyt | PFDN2     |
| 8344 | ATRX.2    | 1.41E-07 | -0.47158 | 0.146 | 0.317 | 0.002653 | Erythrocyt | ATRX      |
| 8345 | KCNAB2.2  | 1.41E-07 | -0.45788 | 0.044 | 0.186 | 0.002654 | Erythrocyt | KCNAB2    |
| 8346 | GRN.2     | 1.42E-07 | -0.87146 | 0.083 | 0.234 | 0.002666 | Erythrocyt | GRN       |
| 8347 | SIGIRR.3  | 1.45E-07 | -0.44324 | 0.218 | 0.399 | 0.002716 | Erythrocyt | SIGIRR    |
| 8348 | LNPEP     | 1.46E-07 | -0.49407 | 0.073 | 0.226 | 0.002734 | Erythrocyt | LNPEP     |
| 8349 | CDC42SE2. | 1.48E-07 | -0.51707 | 0.141 | 0.302 | 0.002771 | Erythrocyt | CDC42SE2  |
| 8350 | PRF1.5    | 1.49E-07 | -1.67376 | 0.039 | 0.176 | 0.002799 | Erythrocyt | PRF1      |
| 8351 | PCBP2.3   | 1.52E-07 | -0.33492 | 0.864 | 0.936 | 0.002854 | Erythrocyt | PCBP2     |
| 8352 | HSPA9.1   | 1.59E-07 | -0.46282 | 0.126 | 0.293 | 0.002981 | Erythrocyt | HSPA9     |
| 8353 | DDX18.2   | 1.62E-07 | -0.42212 | 0.194 | 0.386 | 0.003038 | Erythrocyt | DDX18     |
| 8354 | H2AFV.3   | 1.64E-07 | -0.43118 | 0.175 | 0.361 | 0.003073 | Erythrocyt | H2AFV     |
| 8355 | RAB1B     | 1.64E-07 | -0.35113 | 0.102 | 0.275 | 0.003087 | Erythrocyt | RAB1B     |
| 8356 | GSPT1.1   | 1.66E-07 | 0.457495 | 0.228 | 0.117 | 0.003112 | Erythrocyt | GSPT1     |
| 8357 | CCM2      | 1.67E-07 | -0.48282 | 0.053 | 0.197 | 0.00313  | Erythrocyt | CCM2      |
| 8358 | NAA38.2   | 1.76E-07 | -0.4595  | 0.209 | 0.397 | 0.003297 | Erythrocyt | NAA38     |
| 8359 | NDFIP1.3  | 1.77E-07 | -0.4947  | 0.272 | 0.447 | 0.00333  | Erythrocyt | NDFIP1    |
| 8360 | NCKAP1L.2 | 1.79E-07 | -0.47597 | 0.087 | 0.241 | 0.00336  | Erythrocyt | NCKAP1L   |
| 8361 | CYB5B.1   | 1.80E-07 | -0.44161 | 0.029 | 0.163 | 0.003377 | Erythrocyt | CYB5B     |
| 8362 | TXN2      | 1.82E-07 | -0.42484 | 0.107 | 0.273 | 0.003426 | Erythrocyt | TXN2      |
| 8363 | PSMC6     | 1.86E-07 | -0.42857 | 0.097 | 0.259 | 0.003496 | Erythrocyt | PSMC6     |
| 8364 | NME2.2    | 1.87E-07 | -0.351   | 0.388 | 0.613 | 0.003504 | Erythrocyt | NME2      |
| 8365 | DUT.3     | 1.88E-07 | -0.46928 | 0.184 | 0.365 | 0.003523 | Erythrocyt | DUT       |
| 8366 | DDX39A.1  | 1.89E-07 | -0.49652 | 0.165 | 0.337 | 0.003555 | Erythrocyt | DDX39A    |
| 8367 | COMMD2    | 1.90E-07 | -0.41287 | 0.039 | 0.178 | 0.003562 | Erythrocyt | COMMD2    |

|      |           |          |          |       |       |          |            |          |
|------|-----------|----------|----------|-------|-------|----------|------------|----------|
| 8368 | PUF60.2   | 1.94E-07 | -0.4392  | 0.209 | 0.39  | 0.003651 | Erythrocyt | PUF60    |
| 8369 | PTK2B.1   | 1.96E-07 | -0.4729  | 0.068 | 0.216 | 0.003681 | Erythrocyt | PTK2B    |
| 8370 | IFNGR1.2  | 1.97E-07 | -0.51378 | 0.073 | 0.221 | 0.003705 | Erythrocyt | IFNGR1   |
| 8371 | TNFRSF1B. | 1.98E-07 | -0.55692 | 0.024 | 0.156 | 0.003727 | Erythrocyt | TNFRSF1B |
| 8372 | NKG7.4    | 2.03E-07 | -2.78466 | 0.063 | 0.204 | 0.003804 | Erythrocyt | NKG7     |
| 8373 | TMBIM1    | 2.04E-07 | -0.45509 | 0.049 | 0.192 | 0.003828 | Erythrocyt | TMBIM1   |
| 8374 | IFI30.2   | 2.06E-07 | -0.70352 | 0.005 | 0.124 | 0.003878 | Erythrocyt | IFI30    |
| 8375 | ADGRE5.3  | 2.08E-07 | -0.49217 | 0.107 | 0.273 | 0.0039   | Erythrocyt | ADGRE5   |
| 8376 | SPN.3     | 2.12E-07 | -0.51282 | 0.053 | 0.2   | 0.003974 | Erythrocyt | SPN      |
| 8377 | SRSF4     | 2.18E-07 | -0.45973 | 0.146 | 0.314 | 0.004089 | Erythrocyt | SRSF4    |
| 8378 | MGAT1.1   | 2.18E-07 | -0.46661 | 0.117 | 0.278 | 0.004094 | Erythrocyt | MGAT1    |
| 8379 | MRPL43    | 2.24E-07 | -0.41319 | 0.165 | 0.344 | 0.004207 | Erythrocyt | MRPL43   |
| 8380 | FAM104A   | 2.28E-07 | 0.383008 | 0.238 | 0.123 | 0.004285 | Erythrocyt | FAM104A  |
| 8381 | RBBP7.1   | 2.32E-07 | -0.43805 | 0.117 | 0.283 | 0.004361 | Erythrocyt | RBBP7    |
| 8382 | STAG2.1   | 2.33E-07 | -0.45113 | 0.063 | 0.211 | 0.004374 | Erythrocyt | STAG2    |
| 8383 | NDUFS6.3  | 2.34E-07 | -0.43495 | 0.184 | 0.364 | 0.004396 | Erythrocyt | NDUFS6   |
| 8384 | LSM14A.2  | 2.37E-07 | -0.44399 | 0.18  | 0.359 | 0.004446 | Erythrocyt | LSM14A   |
| 8385 | GNAI2.2   | 2.38E-07 | -0.50687 | 0.112 | 0.275 | 0.004461 | Erythrocyt | GNAI2    |
| 8386 | NUPL2     | 2.42E-07 | -0.41928 | 0.034 | 0.17  | 0.00454  | Erythrocyt | NUPL2    |
| 8387 | MYD88.2   | 2.45E-07 | -0.47324 | 0.053 | 0.194 | 0.004609 | Erythrocyt | MYD88    |
| 8388 | MRPL57.1  | 2.48E-07 | -0.37977 | 0.228 | 0.438 | 0.004662 | Erythrocyt | MRPL57   |
| 8389 | DOCK8.2   | 2.54E-07 | -0.51139 | 0.16  | 0.324 | 0.004767 | Erythrocyt | DOCK8    |
| 8390 | CHURC1.1  | 2.57E-07 | -0.31456 | 0.16  | 0.353 | 0.004832 | Erythrocyt | CHURC1   |
| 8391 | MVP.2     | 2.58E-07 | -0.46138 | 0.146 | 0.316 | 0.00484  | Erythrocyt | MVP      |
| 8392 | TRIM27    | 2.58E-07 | -0.46416 | 0.058 | 0.2   | 0.00485  | Erythrocyt | TRIM27   |
| 8393 | STK17A.3  | 2.60E-07 | -0.50431 | 0.243 | 0.415 | 0.004884 | Erythrocyt | STK17A   |
| 8394 | TSPAN14.1 | 2.65E-07 | -0.3792  | 0.092 | 0.251 | 0.004986 | Erythrocyt | TSPAN14  |
| 8395 | BBX.2     | 2.85E-07 | -0.42626 | 0.039 | 0.177 | 0.005356 | Erythrocyt | BBX      |
| 8396 | POLR2I.1  | 2.85E-07 | -0.45545 | 0.141 | 0.306 | 0.005358 | Erythrocyt | POLR2I   |
| 8397 | PRPF38B.1 | 2.92E-07 | -0.48376 | 0.121 | 0.28  | 0.005484 | Erythrocyt | PRPF38B  |
| 8398 | EFHD2.4   | 2.95E-07 | -0.57393 | 0.024 | 0.151 | 0.005536 | Erythrocyt | EFHD2    |
| 8399 | NCF1.4    | 2.98E-07 | -0.58177 | 0.296 | 0.486 | 0.005607 | Erythrocyt | NCF1     |
| 8400 | CSNK1A1.1 | 2.99E-07 | -0.43408 | 0.155 | 0.32  | 0.005616 | Erythrocyt | CSNK1A1  |
| 8401 | DHRS7.3   | 3.01E-07 | -0.53296 | 0.165 | 0.333 | 0.005661 | Erythrocyt | DHRS7    |
| 8402 | MBD4.2    | 3.09E-07 | -0.44952 | 0.073 | 0.222 | 0.005801 | Erythrocyt | MBD4     |
| 8403 | GRK2.2    | 3.11E-07 | -0.44763 | 0.044 | 0.183 | 0.005841 | Erythrocyt | GRK2     |
| 8404 | COX14     | 3.11E-07 | -0.41221 | 0.17  | 0.346 | 0.005842 | Erythrocyt | COX14    |
| 8405 | UNC119.2  | 3.16E-07 | -0.40094 | 0.058 | 0.207 | 0.005929 | Erythrocyt | UNC119   |
| 8406 | CYB561D2  | 3.19E-07 | -0.42159 | 0.053 | 0.195 | 0.005998 | Erythrocyt | CYB561D2 |
| 8407 | RTN3.3    | 3.25E-07 | -0.42418 | 0.044 | 0.181 | 0.006098 | Erythrocyt | RTN3     |
| 8408 | IGBP1.2   | 3.31E-07 | -0.46155 | 0.204 | 0.381 | 0.006216 | Erythrocyt | IGBP1    |
| 8409 | PHF20.1   | 3.34E-07 | -0.44535 | 0.097 | 0.252 | 0.006276 | Erythrocyt | PHF20    |
| 8410 | HSPD1.3   | 3.38E-07 | -0.42939 | 0.262 | 0.453 | 0.006355 | Erythrocyt | HSPD1    |
| 8411 | PGD.4     | 3.41E-07 | -0.66824 | 0.078 | 0.22  | 0.006412 | Erythrocyt | PGD      |
| 8412 | MLF2      | 3.47E-07 | -0.36083 | 0.18  | 0.363 | 0.006515 | Erythrocyt | MLF2     |
| 8413 | THEMIS2.2 | 3.54E-07 | -0.48726 | 0.034 | 0.165 | 0.006654 | Erythrocyt | THEMIS2  |
| 8414 | COA3.1    | 3.57E-07 | -0.40675 | 0.092 | 0.253 | 0.006702 | Erythrocyt | COA3     |



|      |           |          |          |       |       |          |            |         |
|------|-----------|----------|----------|-------|-------|----------|------------|---------|
| 8415 | CLEC2B.1  | 3.61E-07 | -0.52728 | 0.209 | 0.381 | 0.006781 | Erythrocyt | CLEC2B  |
| 8416 | SDF4.1    | 3.62E-07 | -0.45562 | 0.107 | 0.265 | 0.006805 | Erythrocyt | SDF4    |
| 8417 | METTL26.2 | 3.66E-07 | -0.41852 | 0.238 | 0.424 | 0.006871 | Erythrocyt | METTL26 |
| 8418 | NDUFB7.4  | 3.71E-07 | -0.42802 | 0.272 | 0.458 | 0.006973 | Erythrocyt | NDUFB7  |
| 8419 | NDUFA6.3  | 3.74E-07 | -0.44848 | 0.228 | 0.396 | 0.007027 | Erythrocyt | NDUFA6  |
| 8420 | SELENOW.  | 3.78E-07 | -0.36539 | 0.291 | 0.493 | 0.007095 | Erythrocyt | SELENOW |
| 8421 | EIF3A.2   | 3.85E-07 | -0.42897 | 0.107 | 0.266 | 0.007226 | Erythrocyt | EIF3A   |
| 8422 | PPP5C     | 3.93E-07 | -0.39206 | 0.015 | 0.136 | 0.007375 | Erythrocyt | PPP5C   |
| 8423 | CDKN1B.2  | 3.93E-07 | -0.42635 | 0.121 | 0.288 | 0.007378 | Erythrocyt | CDKN1B  |
| 8424 | GGNBP2.1  | 3.93E-07 | -0.41894 | 0.121 | 0.286 | 0.007385 | Erythrocyt | GGNBP2  |
| 8425 | FNTA.2    | 3.98E-07 | -0.4161  | 0.092 | 0.246 | 0.007468 | Erythrocyt | FNTA    |
| 8426 | COMT.2    | 4.14E-07 | -0.4352  | 0.083 | 0.233 | 0.00777  | Erythrocyt | COMT    |
| 8427 | IDS.1     | 4.17E-07 | -0.44995 | 0.068 | 0.214 | 0.007841 | Erythrocyt | IDS     |
| 8428 | MYADM.3   | 4.22E-07 | -0.4977  | 0.039 | 0.169 | 0.007919 | Erythrocyt | MYADM   |
| 8429 | PIN1      | 4.25E-07 | -0.43364 | 0.112 | 0.269 | 0.007989 | Erythrocyt | PIN1    |
| 8430 | RAB11B.1  | 4.30E-07 | -0.46207 | 0.204 | 0.374 | 0.008069 | Erythrocyt | RAB11B  |
| 8431 | UBE2L3.2  | 4.30E-07 | -0.4061  | 0.155 | 0.326 | 0.008076 | Erythrocyt | UBE2L3  |
| 8432 | MRPS7.1   | 4.33E-07 | -0.41945 | 0.121 | 0.286 | 0.008137 | Erythrocyt | MRPS7   |
| 8433 | PIK3R1.2  | 4.34E-07 | -0.48249 | 0.058 | 0.197 | 0.008145 | Erythrocyt | PIK3R1  |
| 8434 | VPS4B.1   | 4.44E-07 | -0.46489 | 0.078 | 0.219 | 0.008338 | Erythrocyt | VPS4B   |
| 8435 | LIME1.4   | 4.45E-07 | -0.47631 | 0.141 | 0.312 | 0.008364 | Erythrocyt | LIME1   |
| 8436 | NDUFS8.1  | 4.48E-07 | -0.38271 | 0.218 | 0.401 | 0.008421 | Erythrocyt | NDUFS8  |
| 8437 | MRPL24.1  | 4.51E-07 | -0.38978 | 0.068 | 0.212 | 0.008473 | Erythrocyt | MRPL24  |
| 8438 | FIBP      | 4.53E-07 | -0.36896 | 0.102 | 0.265 | 0.008501 | Erythrocyt | FIBP    |
| 8439 | DPYD.3    | 4.60E-07 | -0.46091 | 0.068 | 0.211 | 0.008641 | Erythrocyt | DPYD    |
| 8440 | PRDX2.4   | 4.62E-07 | 0.586006 | 0.553 | 0.433 | 0.008675 | Erythrocyt | PRDX2   |
| 8441 | GNB2.3    | 4.65E-07 | -0.4191  | 0.218 | 0.408 | 0.008729 | Erythrocyt | GNB2    |
| 8442 | EIF5.1    | 4.65E-07 | -0.46713 | 0.243 | 0.411 | 0.008743 | Erythrocyt | EIF5    |
| 8443 | BLOC1S1.1 | 4.71E-07 | -0.44635 | 0.243 | 0.425 | 0.008843 | Erythrocyt | BLOC1S1 |
| 8444 | KRT10.1   | 4.89E-07 | -0.40809 | 0.199 | 0.385 | 0.009193 | Erythrocyt | KRT10   |
| 8445 | PFKL.2    | 4.91E-07 | -0.40953 | 0.112 | 0.278 | 0.00923  | Erythrocyt | PFKL    |
| 8446 | SNX1.1    | 4.97E-07 | -0.38235 | 0.112 | 0.272 | 0.009333 | Erythrocyt | SNX1    |
| 8447 | LYAR.4    | 4.99E-07 | -0.58798 | 0.034 | 0.164 | 0.009366 | Erythrocyt | LYAR    |
| 8448 | RAB11A.2  | 4.99E-07 | -0.38063 | 0.141 | 0.316 | 0.009378 | Erythrocyt | RAB11A  |
| 8449 | NUTF2.1   | 5.04E-07 | -0.37646 | 0.189 | 0.366 | 0.009466 | Erythrocyt | NUTF2   |
| 8450 | MRPL18    | 5.05E-07 | -0.4397  | 0.102 | 0.256 | 0.009481 | Erythrocyt | MRPL18  |
| 8451 | SNRPF.1   | 5.08E-07 | -0.3858  | 0.238 | 0.42  | 0.009543 | Erythrocyt | SNRPF   |
| 8452 | VDAC1.1   | 5.10E-07 | -0.40719 | 0.165 | 0.335 | 0.00958  | Erythrocyt | VDAC1   |
| 8453 | SPSB3.1   | 5.14E-07 | -0.43313 | 0.243 | 0.414 | 0.009648 | Erythrocyt | SPSB3   |
| 8454 | DHPS.2    | 5.14E-07 | -0.33999 | 0.141 | 0.313 | 0.009662 | Erythrocyt | DHPS    |
| 8455 | CHMP2A.1  | 5.15E-07 | -0.43352 | 0.102 | 0.258 | 0.009683 | Erythrocyt | CHMP2A  |
| 8456 | PWP1.2    | 5.20E-07 | -0.48355 | 0.102 | 0.248 | 0.009763 | Erythrocyt | PWP1    |
| 8457 | SMIM29.3  | 5.24E-07 | -0.47193 | 0.049 | 0.181 | 0.009844 | Erythrocyt | SMIM29  |
| 8458 | TOR3A.2   | 5.33E-07 | -0.39709 | 0.019 | 0.14  | 0.010011 | Erythrocyt | TOR3A   |
| 8459 | NSUN5.1   | 5.34E-07 | -0.41008 | 0.073 | 0.221 | 0.010025 | Erythrocyt | NSUN5   |
| 8460 | DUSP11.1  | 5.39E-07 | -0.40551 | 0.044 | 0.177 | 0.010119 | Erythrocyt | DUSP11  |
| 8461 | TAF1D.4   | 5.40E-07 | -0.46259 | 0.155 | 0.32  | 0.010137 | Erythrocyt | TAF1D   |

|      |           |          |          |       |       |          |            |         |
|------|-----------|----------|----------|-------|-------|----------|------------|---------|
| 8462 | PSMC4     | 5.48E-07 | -0.43035 | 0.092 | 0.241 | 0.010301 | Erythrocyt | PSMC4   |
| 8463 | GPX4.3    | 5.54E-07 | -0.33381 | 0.393 | 0.605 | 0.010412 | Erythrocyt | GPX4    |
| 8464 | GTF3C6    | 5.55E-07 | -0.44488 | 0.117 | 0.27  | 0.010435 | Erythrocyt | GTF3C6  |
| 8465 | CD79B.5   | 5.66E-07 | -0.69248 | 0.146 | 0.31  | 0.010638 | Erythrocyt | CD79B   |
| 8466 | CD300A.4  | 5.88E-07 | -0.56687 | 0.024 | 0.146 | 0.011044 | Erythrocyt | CD300A  |
| 8467 | NDUFS2    | 5.90E-07 | -0.401   | 0.16  | 0.332 | 0.011085 | Erythrocyt | NDUFS2  |
| 8468 | FIP1L1.1  | 5.97E-07 | -0.39529 | 0.058 | 0.201 | 0.011207 | Erythrocyt | FIP1L1  |
| 8469 | USP10     | 5.97E-07 | -0.41932 | 0.058 | 0.199 | 0.011211 | Erythrocyt | USP10   |
| 8470 | PAPOLA    | 5.98E-07 | -0.44107 | 0.165 | 0.324 | 0.011233 | Erythrocyt | PAPOLA  |
| 8471 | CRLF3.1   | 6.09E-07 | -0.47895 | 0.126 | 0.28  | 0.011436 | Erythrocyt | CRLF3   |
| 8472 | ATXN10.2  | 6.11E-07 | -0.39039 | 0.17  | 0.336 | 0.011474 | Erythrocyt | ATXN10  |
| 8473 | APMAP.3   | 6.13E-07 | -0.61804 | 0.078 | 0.219 | 0.011524 | Erythrocyt | APMAP   |
| 8474 | SDHC      | 6.15E-07 | -0.46715 | 0.18  | 0.343 | 0.011553 | Erythrocyt | SDHC    |
| 8475 | ICAM2.2   | 6.15E-07 | -0.4221  | 0.204 | 0.389 | 0.011561 | Erythrocyt | ICAM2   |
| 8476 | ISG20.4   | 6.18E-07 | -0.3587  | 0.388 | 0.563 | 0.011614 | Erythrocyt | ISG20   |
| 8477 | GPR65.3   | 6.29E-07 | -0.40544 | 0.049 | 0.187 | 0.011812 | Erythrocyt | GPR65   |
| 8478 | HSPA4.1   | 6.32E-07 | -0.45007 | 0.063 | 0.2   | 0.011879 | Erythrocyt | HSPA4   |
| 8479 | SFT2D1.1  | 6.67E-07 | -0.41024 | 0.092 | 0.244 | 0.012523 | Erythrocyt | SFT2D1  |
| 8480 | POLE3     | 6.70E-07 | -0.44022 | 0.053 | 0.188 | 0.01259  | Erythrocyt | POLE3   |
| 8481 | PDIA4.2   | 6.76E-07 | -0.46305 | 0.078 | 0.223 | 0.012698 | Erythrocyt | PDIA4   |
| 8482 | SCAF11.1  | 6.83E-07 | -0.48338 | 0.16  | 0.315 | 0.012836 | Erythrocyt | SCAF11  |
| 8483 | ATG16L2.2 | 6.90E-07 | -0.40421 | 0.029 | 0.156 | 0.012961 | Erythrocyt | ATG16L2 |
| 8484 | NUDT4     | 6.92E-07 | 0.384733 | 0.165 | 0.076 | 0.013001 | Erythrocyt | NUDT4   |
| 8485 | LRPAP1.2  | 6.97E-07 | -0.43566 | 0.126 | 0.279 | 0.013096 | Erythrocyt | LRPAP1  |
| 8486 | G3BP1.1   | 6.98E-07 | -0.42855 | 0.146 | 0.303 | 0.013115 | Erythrocyt | G3BP1   |
| 8487 | DNAJB6.2  | 7.08E-07 | -0.4342  | 0.131 | 0.285 | 0.013309 | Erythrocyt | DNAJB6  |
| 8488 | PRKDC     | 7.10E-07 | -0.40682 | 0.073 | 0.214 | 0.013328 | Erythrocyt | PRKDC   |
| 8489 | ING4.2    | 7.10E-07 | -0.4066  | 0.068 | 0.212 | 0.013335 | Erythrocyt | ING4    |
| 8490 | CST7.3    | 7.21E-07 | -1.64627 | 0.044 | 0.17  | 0.013535 | Erythrocyt | CST7    |
| 8491 | ANXA4.2   | 7.29E-07 | -0.48593 | 0.029 | 0.153 | 0.013689 | Erythrocyt | ANXA4   |
| 8492 | SPCS3.3   | 7.33E-07 | -0.49551 | 0.078 | 0.22  | 0.013775 | Erythrocyt | SPCS3   |
| 8493 | SDCBP.3   | 7.34E-07 | -0.51479 | 0.184 | 0.348 | 0.013785 | Erythrocyt | SDCBP   |
| 8494 | METTL23.2 | 7.46E-07 | -0.41134 | 0.112 | 0.266 | 0.014018 | Erythrocyt | METTL23 |
| 8495 | UBE2D1.2  | 7.48E-07 | -0.43581 | 0.058 | 0.194 | 0.014047 | Erythrocyt | UBE2D1  |
| 8496 | DENND2D.  | 7.51E-07 | -0.47994 | 0.233 | 0.41  | 0.014115 | Erythrocyt | DENND2D |
| 8497 | KPNB1     | 7.53E-07 | -0.41754 | 0.126 | 0.289 | 0.01414  | Erythrocyt | KPNB1   |
| 8498 | C1orf43.2 | 7.59E-07 | -0.4215  | 0.184 | 0.347 | 0.014262 | Erythrocyt | C1orf43 |
| 8499 | C1D       | 7.65E-07 | -0.40839 | 0.136 | 0.293 | 0.014378 | Erythrocyt | C1D     |
| 8500 | FUS.2     | 7.78E-07 | -0.39215 | 0.335 | 0.52  | 0.014617 | Erythrocyt | FUS     |
| 8501 | NECAP2    | 7.79E-07 | -0.43501 | 0.131 | 0.288 | 0.01464  | Erythrocyt | NECAP2  |
| 8502 | CLINT1.1  | 7.80E-07 | -0.41754 | 0.058 | 0.192 | 0.014643 | Erythrocyt | CLINT1  |
| 8503 | PPP6C     | 7.85E-07 | -0.44644 | 0.146 | 0.301 | 0.014754 | Erythrocyt | PPP6C   |
| 8504 | PSMC3     | 7.93E-07 | -0.39065 | 0.102 | 0.257 | 0.014899 | Erythrocyt | PSMC3   |
| 8505 | TSPO.3    | 7.94E-07 | -0.95054 | 0.32  | 0.479 | 0.014919 | Erythrocyt | TSPO    |
| 8506 | ADA.2     | 7.95E-07 | -0.37078 | 0.015 | 0.131 | 0.014934 | Erythrocyt | ADA     |
| 8507 | PLD3.2    | 8.03E-07 | -0.36414 | 0.068 | 0.211 | 0.015083 | Erythrocyt | PLD3    |
| 8508 | EMC4.1    | 8.06E-07 | -0.39497 | 0.141 | 0.306 | 0.015143 | Erythrocyt | EMC4    |

|      |           |          |          |       |       |          |            |          |
|------|-----------|----------|----------|-------|-------|----------|------------|----------|
| 8509 | MGAT4A.2  | 8.24E-07 | -0.47007 | 0.107 | 0.255 | 0.015474 | Erythrocyt | MGAT4A   |
| 8510 | TMED2.1   | 8.28E-07 | -0.37851 | 0.16  | 0.327 | 0.015561 | Erythrocyt | TMED2    |
| 8511 | EMC10     | 8.38E-07 | -0.42383 | 0.058 | 0.194 | 0.015733 | Erythrocyt | EMC10    |
| 8512 | C4orf48.3 | 8.39E-07 | -0.43999 | 0.141 | 0.302 | 0.015756 | Erythrocyt | C4orf48  |
| 8513 | OGA.1     | 8.41E-07 | -0.47186 | 0.063 | 0.198 | 0.015804 | Erythrocyt | OGA      |
| 8514 | MARCH7.1  | 8.55E-07 | -0.43257 | 0.049 | 0.179 | 0.016062 | Erythrocyt | Mar-07   |
| 8515 | ACADVL.2  | 8.57E-07 | -0.42811 | 0.16  | 0.321 | 0.016092 | Erythrocyt | ACADVL   |
| 8516 | NUCB2.4   | 8.58E-07 | -0.50227 | 0.189 | 0.362 | 0.016113 | Erythrocyt | NUCB2    |
| 8517 | SDHD.1    | 8.58E-07 | -0.30587 | 0.17  | 0.348 | 0.016126 | Erythrocyt | SDHD     |
| 8518 | MIF4GD    | 8.67E-07 | -0.42779 | 0.058 | 0.193 | 0.016278 | Erythrocyt | MIF4GD   |
| 8519 | APH1A.2   | 8.67E-07 | -0.39495 | 0.248 | 0.428 | 0.016281 | Erythrocyt | APH1A    |
| 8520 | AP1S2.2   | 8.69E-07 | -0.43729 | 0.107 | 0.265 | 0.016322 | Erythrocyt | AP1S2    |
| 8521 | ELF2.1    | 8.73E-07 | -0.41134 | 0.044 | 0.175 | 0.0164   | Erythrocyt | ELF2     |
| 8522 | ZNF22.3   | 8.74E-07 | -0.4315  | 0.126 | 0.285 | 0.01642  | Erythrocyt | ZNF22    |
| 8523 | NINJ1.2   | 8.82E-07 | -0.50589 | 0.053 | 0.185 | 0.016566 | Erythrocyt | NINJ1    |
| 8524 | PSIP1.1   | 9.08E-07 | -0.42783 | 0.199 | 0.37  | 0.017049 | Erythrocyt | PSIP1    |
| 8525 | DNAJC7    | 9.16E-07 | -0.4367  | 0.107 | 0.256 | 0.017208 | Erythrocyt | DNAJC7   |
| 8526 | MCRIP1.1  | 9.20E-07 | -0.37435 | 0.083 | 0.233 | 0.017282 | Erythrocyt | MCRIP1   |
| 8527 | TMED5.1   | 9.21E-07 | -0.43498 | 0.049 | 0.177 | 0.017303 | Erythrocyt | TMED5    |
| 8528 | IFNGR2.3  | 9.31E-07 | -0.56261 | 0.175 | 0.328 | 0.017481 | Erythrocyt | IFNGR2   |
| 8529 | ASAH1.2   | 9.31E-07 | -0.53213 | 0.146 | 0.295 | 0.017487 | Erythrocyt | ASAH1    |
| 8530 | BID.2     | 9.31E-07 | -0.42219 | 0.039 | 0.166 | 0.01749  | Erythrocyt | BID      |
| 8531 | BTN3A2.4  | 9.37E-07 | -0.42501 | 0.102 | 0.255 | 0.017605 | Erythrocyt | BTN3A2   |
| 8532 | CDC42EP3. | 9.40E-07 | -0.49064 | 0.049 | 0.18  | 0.017662 | Erythrocyt | CDC42EP3 |
| 8533 | TIMP1.3   | 9.42E-07 | -0.84476 | 0.092 | 0.237 | 0.017687 | Erythrocyt | TIMP1    |
| 8534 | MRPL34    | 9.47E-07 | -0.39475 | 0.16  | 0.329 | 0.017783 | Erythrocyt | MRPL34   |
| 8535 | PDLIM2.1  | 9.52E-07 | -0.41486 | 0.107 | 0.258 | 0.017882 | Erythrocyt | PDLIM2   |
| 8536 | PPT1.3    | 9.69E-07 | -0.42706 | 0.092 | 0.237 | 0.018205 | Erythrocyt | PPT1     |
| 8537 | ERICH1.2  | 9.73E-07 | -0.38673 | 0.083 | 0.226 | 0.01827  | Erythrocyt | ERICH1   |
| 8538 | DNAJC8.1  | 9.74E-07 | -0.32027 | 0.218 | 0.403 | 0.018294 | Erythrocyt | DNAJC8   |
| 8539 | ANKRD12.1 | 9.81E-07 | -0.41493 | 0.218 | 0.396 | 0.018421 | Erythrocyt | ANKRD12  |
| 8540 | GORASP2.1 | 9.82E-07 | -0.43438 | 0.087 | 0.229 | 0.018444 | Erythrocyt | GORASP2  |
| 8541 | RER1.1    | 9.93E-07 | -0.37318 | 0.16  | 0.322 | 0.018652 | Erythrocyt | RER1     |
| 8542 | COX7B.3   | 9.98E-07 | -0.35834 | 0.306 | 0.491 | 0.018747 | Erythrocyt | COX7B    |
| 8543 | NDUFB6.2  | 1.02E-06 | -0.31335 | 0.16  | 0.346 | 0.019071 | Erythrocyt | NDUFB6   |
| 8544 | ARHGAP25  | 1.02E-06 | -0.44684 | 0.063 | 0.199 | 0.019146 | Erythrocyt | ARHGAP25 |
| 8545 | RAP1A.1   | 1.03E-06 | -0.43741 | 0.189 | 0.358 | 0.019276 | Erythrocyt | RAP1A    |
| 8546 | ERGIC3.2  | 1.03E-06 | -0.44995 | 0.209 | 0.361 | 0.019354 | Erythrocyt | ERGIC3   |
| 8547 | EIF3E.4   | 1.03E-06 | -0.32111 | 0.442 | 0.681 | 0.019355 | Erythrocyt | EIF3E    |
| 8548 | YTHDF2.1  | 1.03E-06 | -0.3901  | 0.16  | 0.313 | 0.019366 | Erythrocyt | YTHDF2   |
| 8549 | SRPRA.1   | 1.03E-06 | -0.42987 | 0.112 | 0.26  | 0.019367 | Erythrocyt | SRPRA    |
| 8550 | TMEM14B   | 1.04E-06 | -0.40858 | 0.252 | 0.426 | 0.019584 | Erythrocyt | TMEM14B  |
| 8551 | NPC2.1    | 1.08E-06 | -0.60342 | 0.155 | 0.31  | 0.020326 | Erythrocyt | NPC2     |
| 8552 | ZEB2.3    | 1.08E-06 | -0.50919 | 0.029 | 0.15  | 0.020342 | Erythrocyt | ZEB2     |
| 8553 | PPP3CC.3  | 1.09E-06 | -0.45454 | 0.092 | 0.238 | 0.02047  | Erythrocyt | PPP3CC   |
| 8554 | POLR2L.3  | 1.09E-06 | -0.35878 | 0.35  | 0.538 | 0.020472 | Erythrocyt | POLR2L   |
| 8555 | EVI2B.1   | 1.10E-06 | -0.39548 | 0.024 | 0.144 | 0.020609 | Erythrocyt | EVI2B    |

|      |           |          |          |       |       |          |            |          |
|------|-----------|----------|----------|-------|-------|----------|------------|----------|
| 8556 | IRF1.3    | 1.13E-06 | -0.58949 | 0.233 | 0.404 | 0.021192 | Erythrocyt | IRF1     |
| 8557 | NKTR.1    | 1.14E-06 | -0.40488 | 0.073 | 0.214 | 0.021391 | Erythrocyt | NKTR     |
| 8558 | COP56     | 1.16E-06 | -0.40515 | 0.184 | 0.346 | 0.021721 | Erythrocyt | COP56    |
| 8559 | MFF       | 1.18E-06 | -0.37267 | 0.16  | 0.323 | 0.02218  | Erythrocyt | MFF      |
| 8560 | PIAS1.1   | 1.18E-06 | -0.45347 | 0.087 | 0.227 | 0.022189 | Erythrocyt | PIAS1    |
| 8561 | CD68.4    | 1.20E-06 | -0.76159 | 0     | 0.103 | 0.022563 | Erythrocyt | CD68     |
| 8562 | NAA10     | 1.22E-06 | -0.36134 | 0.049 | 0.181 | 0.022824 | Erythrocyt | NAA10    |
| 8563 | SSBP1.1   | 1.22E-06 | -0.37028 | 0.311 | 0.493 | 0.022986 | Erythrocyt | SSBP1    |
| 8564 | SERINC3   | 1.23E-06 | -0.41449 | 0.083 | 0.223 | 0.023046 | Erythrocyt | SERINC3  |
| 8565 | SCAF4.1   | 1.23E-06 | -0.39714 | 0.029 | 0.15  | 0.023183 | Erythrocyt | SCAF4    |
| 8566 | DNAJC3.2  | 1.24E-06 | -0.39101 | 0.029 | 0.149 | 0.023362 | Erythrocyt | DNAJC3   |
| 8567 | MRPL3.2   | 1.25E-06 | -0.39646 | 0.097 | 0.245 | 0.023421 | Erythrocyt | MRPL3    |
| 8568 | FBL.1     | 1.25E-06 | -0.40658 | 0.175 | 0.344 | 0.02346  | Erythrocyt | FBL      |
| 8569 | PTBP3.1   | 1.26E-06 | -0.40483 | 0.053 | 0.186 | 0.023669 | Erythrocyt | PTBP3    |
| 8570 | WNK1      | 1.27E-06 | 0.331277 | 0.243 | 0.131 | 0.023845 | Erythrocyt | WNK1     |
| 8571 | EIF6      | 1.28E-06 | -0.42401 | 0.16  | 0.321 | 0.024086 | Erythrocyt | EIF6     |
| 8572 | ANKRD44   | 1.29E-06 | -0.41291 | 0.136 | 0.291 | 0.02418  | Erythrocyt | ANKRD44  |
| 8573 | CENPX     | 1.29E-06 | -0.40174 | 0.087 | 0.234 | 0.02428  | Erythrocyt | CENPX    |
| 8574 | MRPS15.1  | 1.30E-06 | -0.39293 | 0.112 | 0.263 | 0.024417 | Erythrocyt | MRPS15   |
| 8575 | ARHGAP45  | 1.30E-06 | -0.43162 | 0.228 | 0.397 | 0.02451  | Erythrocyt | ARHGAP45 |
| 8576 | AIF1.5    | 1.34E-06 | -1.27557 | 0.15  | 0.288 | 0.025168 | Erythrocyt | AIF1     |
| 8577 | SELENOS.2 | 1.36E-06 | -0.43523 | 0.049 | 0.177 | 0.025462 | Erythrocyt | SELENOS  |
| 8578 | MCUB.4    | 1.36E-06 | -0.36335 | 0.34  | 0.516 | 0.025496 | Erythrocyt | MCUB     |
| 8579 | PMPCB.1   | 1.36E-06 | -0.38683 | 0.126 | 0.284 | 0.025577 | Erythrocyt | PMPCB    |
| 8580 | DYNLT1.4  | 1.37E-06 | -0.43441 | 0.136 | 0.29  | 0.025776 | Erythrocyt | DYNLT1   |
| 8581 | MTPN.4    | 1.38E-06 | -0.4853  | 0.199 | 0.354 | 0.026008 | Erythrocyt | MTPN     |
| 8582 | RALA      | 1.41E-06 | -0.35834 | 0.073 | 0.213 | 0.026416 | Erythrocyt | RALA     |
| 8583 | SMARCB1.1 | 1.42E-06 | -0.36216 | 0.15  | 0.319 | 0.026633 | Erythrocyt | SMARCB1  |
| 8584 | SDR39U1.2 | 1.43E-06 | -0.36536 | 0.16  | 0.325 | 0.026887 | Erythrocyt | SDR39U1  |
| 8585 | MAGOH.1   | 1.45E-06 | -0.34948 | 0.243 | 0.423 | 0.027155 | Erythrocyt | MAGOH    |
| 8586 | TMEM109   | 1.45E-06 | -0.39847 | 0.102 | 0.254 | 0.027183 | Erythrocyt | TMEM109  |
| 8587 | AKIRIN2.2 | 1.45E-06 | -0.43589 | 0.073 | 0.208 | 0.027306 | Erythrocyt | AKIRIN2  |
| 8588 | NAGK.1    | 1.48E-06 | -0.36739 | 0.034 | 0.159 | 0.027765 | Erythrocyt | NAGK     |
| 8589 | PARP8.2   | 1.49E-06 | -0.42222 | 0.034 | 0.156 | 0.027926 | Erythrocyt | PARP8    |
| 8590 | URM1      | 1.50E-06 | -0.34302 | 0.083 | 0.228 | 0.02809  | Erythrocyt | URM1     |
| 8591 | ZFAND6    | 1.51E-06 | -0.38354 | 0.083 | 0.228 | 0.028299 | Erythrocyt | ZFAND6   |
| 8592 | SP110.1   | 1.54E-06 | -0.48591 | 0.199 | 0.352 | 0.028879 | Erythrocyt | SP110    |
| 8593 | HOOK3.1   | 1.54E-06 | -0.35595 | 0.015 | 0.127 | 0.028908 | Erythrocyt | HOOK3    |
| 8594 | OSGEP.2   | 1.54E-06 | -0.4514  | 0.073 | 0.204 | 0.028949 | Erythrocyt | OSGEP    |
| 8595 | SND1.1    | 1.54E-06 | -0.42485 | 0.068 | 0.2   | 0.028958 | Erythrocyt | SND1     |
| 8596 | PNRC2.2   | 1.57E-06 | -0.35715 | 0.209 | 0.383 | 0.029534 | Erythrocyt | PNRC2    |
| 8597 | SRPK2.2   | 1.58E-06 | -0.43888 | 0.121 | 0.267 | 0.029654 | Erythrocyt | SRPK2    |
| 8598 | TMEM243   | 1.58E-06 | -0.39535 | 0.238 | 0.401 | 0.029667 | Erythrocyt | TMEM243  |
| 8599 | RBM42     | 1.58E-06 | -0.35693 | 0.117 | 0.271 | 0.029723 | Erythrocyt | RBM42    |
| 8600 | LSM6.2    | 1.59E-06 | -0.32577 | 0.209 | 0.393 | 0.029782 | Erythrocyt | LSM6     |
| 8601 | NRDC.1    | 1.60E-06 | -0.42434 | 0.073 | 0.207 | 0.030024 | Erythrocyt | NRDC     |
| 8602 | ILF3      | 1.63E-06 | -0.37515 | 0.141 | 0.298 | 0.030683 | Erythrocyt | ILF3     |

|      |           |          |          |       |       |          |            |           |
|------|-----------|----------|----------|-------|-------|----------|------------|-----------|
| 8603 | LAT2.4    | 1.69E-06 | -0.54156 | 0.078 | 0.216 | 0.031754 | Erythrocyt | LAT2      |
| 8604 | ATG3.1    | 1.69E-06 | -0.47092 | 0.146 | 0.287 | 0.03176  | Erythrocyt | ATG3      |
| 8605 | SENP6.1   | 1.70E-06 | -0.44547 | 0.068 | 0.199 | 0.031892 | Erythrocyt | SENP6     |
| 8606 | BCCIP     | 1.72E-06 | -0.4087  | 0.117 | 0.265 | 0.032293 | Erythrocyt | BCCIP     |
| 8607 | KLF6.5    | 1.73E-06 | -0.5109  | 0.16  | 0.32  | 0.032425 | Erythrocyt | KLF6      |
| 8608 | NUP214.3  | 1.73E-06 | -0.45812 | 0.029 | 0.146 | 0.032471 | Erythrocyt | NUP214    |
| 8609 | PTDSS1.2  | 1.73E-06 | -0.42951 | 0.126 | 0.275 | 0.032537 | Erythrocyt | PTDSS1    |
| 8610 | ZFR       | 1.76E-06 | -0.39688 | 0.049 | 0.175 | 0.033035 | Erythrocyt | ZFR       |
| 8611 | MRPL20    | 1.76E-06 | -0.33853 | 0.228 | 0.409 | 0.033061 | Erythrocyt | MRPL20    |
| 8612 | GIT2.1    | 1.77E-06 | -0.39319 | 0.068 | 0.2   | 0.033249 | Erythrocyt | GIT2      |
| 8613 | CD3G.4    | 1.77E-06 | -0.55485 | 0.243 | 0.411 | 0.03334  | Erythrocyt | CD3G      |
| 8614 | PRDX5.3   | 1.78E-06 | -0.3394  | 0.354 | 0.539 | 0.033401 | Erythrocyt | PRDX5     |
| 8615 | EMB.1     | 1.79E-06 | -0.48322 | 0.083 | 0.215 | 0.033556 | Erythrocyt | EMB       |
| 8616 | WBP11.1   | 1.81E-06 | -0.36904 | 0.063 | 0.198 | 0.034074 | Erythrocyt | WBP11     |
| 8617 | CD2BP2.1  | 1.83E-06 | -0.33109 | 0.063 | 0.201 | 0.034427 | Erythrocyt | CD2BP2    |
| 8618 | GPAA1.2   | 1.84E-06 | -0.37696 | 0.087 | 0.23  | 0.034598 | Erythrocyt | GPAA1     |
| 8619 | UCKL1     | 1.86E-06 | -0.36205 | 0.029 | 0.147 | 0.034919 | Erythrocyt | UCKL1     |
| 8620 | PRMT1.2   | 1.86E-06 | -0.40226 | 0.233 | 0.407 | 0.034932 | Erythrocyt | PRMT1     |
| 8621 | SEC11C.1  | 1.87E-06 | -0.51086 | 0.121 | 0.266 | 0.035151 | Erythrocyt | SEC11C    |
| 8622 | TES.2     | 1.88E-06 | -0.4079  | 0.131 | 0.282 | 0.035236 | Erythrocyt | TES       |
| 8623 | ITSN2.2   | 1.88E-06 | -0.41206 | 0.117 | 0.268 | 0.035298 | Erythrocyt | ITSN2     |
| 8624 | DAP3.1    | 1.92E-06 | -0.36901 | 0.131 | 0.288 | 0.036046 | Erythrocyt | DAP3      |
| 8625 | ERCC1.1   | 1.93E-06 | -0.34585 | 0.053 | 0.185 | 0.036192 | Erythrocyt | ERCC1     |
| 8626 | FAM96A.3  | 1.93E-06 | -0.40002 | 0.189 | 0.353 | 0.036334 | Erythrocyt | FAM96A    |
| 8627 | TBRG1.2   | 1.97E-06 | -0.41752 | 0.136 | 0.286 | 0.036959 | Erythrocyt | TBRG1     |
| 8628 | PSMB8-AS1 | 1.98E-06 | -0.39419 | 0.238 | 0.419 | 0.037228 | Erythrocyt | PSMB8-AS1 |
| 8629 | PRKCH.5   | 1.99E-06 | -0.49699 | 0.107 | 0.25  | 0.037302 | Erythrocyt | PRKCH     |
| 8630 | GMIP.1    | 2.00E-06 | -0.3679  | 0.029 | 0.147 | 0.037567 | Erythrocyt | GMIP      |
| 8631 | PCMT1     | 2.01E-06 | -0.33752 | 0.117 | 0.265 | 0.037787 | Erythrocyt | PCMT1     |
| 8632 | PLEKHF2.3 | 2.03E-06 | -0.36729 | 0.044 | 0.172 | 0.038119 | Erythrocyt | PLEKHF2   |
| 8633 | GPR108    | 2.03E-06 | -0.38162 | 0.034 | 0.153 | 0.038138 | Erythrocyt | GPR108    |
| 8634 | IRF7.1    | 2.03E-06 | -0.39954 | 0.146 | 0.311 | 0.038183 | Erythrocyt | IRF7      |
| 8635 | DHX30     | 2.04E-06 | -0.38147 | 0.044 | 0.167 | 0.038286 | Erythrocyt | DHX30     |
| 8636 | PSMA4.2   | 2.04E-06 | -0.33963 | 0.165 | 0.331 | 0.038365 | Erythrocyt | PSMA4     |
| 8637 | BIRC6     | 2.06E-06 | -0.37207 | 0.029 | 0.148 | 0.038723 | Erythrocyt | BIRC6     |
| 8638 | TAF7.1    | 2.07E-06 | -0.41987 | 0.18  | 0.34  | 0.038836 | Erythrocyt | TAF7      |
| 8639 | ELOVL5.2  | 2.11E-06 | -0.43303 | 0.146 | 0.292 | 0.039699 | Erythrocyt | ELOVL5    |
| 8640 | GZMM.5    | 2.12E-06 | -0.5878  | 0.248 | 0.409 | 0.039809 | Erythrocyt | GZMM      |
| 8641 | PNN.3     | 2.14E-06 | -0.33913 | 0.18  | 0.333 | 0.040182 | Erythrocyt | PNN       |
| 8642 | NCBP2-AS2 | 2.16E-06 | -0.40944 | 0.136 | 0.284 | 0.040593 | Erythrocyt | NCBP2-AS2 |
| 8643 | POLR2K    | 2.20E-06 | -0.3386  | 0.126 | 0.283 | 0.041342 | Erythrocyt | POLR2K    |
| 8644 | TM9SF2.2  | 2.21E-06 | -0.38684 | 0.097 | 0.242 | 0.041513 | Erythrocyt | TM9SF2    |
| 8645 | MSL3.1    | 2.22E-06 | -0.40632 | 0.068 | 0.203 | 0.041763 | Erythrocyt | MSL3      |
| 8646 | TPRKB     | 2.26E-06 | -0.30308 | 0.058 | 0.191 | 0.042432 | Erythrocyt | TPRKB     |
| 8647 | FAM173A   | 2.26E-06 | -0.41083 | 0.078 | 0.215 | 0.042545 | Erythrocyt | FAM173A   |
| 8648 | SF3B5.2   | 2.27E-06 | -0.3508  | 0.291 | 0.461 | 0.042705 | Erythrocyt | SF3B5     |
| 8649 | HLA-DMA.  | 2.36E-06 | -0.69016 | 0.194 | 0.346 | 0.04432  | Erythrocyt | HLA-DMA   |

|       |           |          |          |       |       |          |            |            |
|-------|-----------|----------|----------|-------|-------|----------|------------|------------|
| 8650  | ABLIM1.4  | 2.36E-06 | -0.40545 | 0.126 | 0.275 | 0.044375 | Erythrocyt | ABLIM1     |
| 8651  | CRIP1.2   | 2.38E-06 | -0.55497 | 0.218 | 0.384 | 0.044738 | Erythrocyt | CRIP1      |
| 8652  | HNRNPR.1  | 2.39E-06 | -0.36487 | 0.243 | 0.419 | 0.044861 | Erythrocyt | HNRNPR     |
| 8653  | COMMD1.   | 2.39E-06 | -0.34128 | 0.044 | 0.168 | 0.044871 | Erythrocyt | COMMD1     |
| 8654  | TTC3.1    | 2.39E-06 | -0.37177 | 0.126 | 0.277 | 0.044873 | Erythrocyt | TTC3       |
| 8655  | ERP44.2   | 2.42E-06 | -0.4118  | 0.107 | 0.248 | 0.045397 | Erythrocyt | ERP44      |
| 8656  | PTGES3.2  | 2.43E-06 | -0.34623 | 0.524 | 0.669 | 0.045739 | Erythrocyt | PTGES3     |
| 8657  | AAK1.1    | 2.44E-06 | -0.43383 | 0.092 | 0.234 | 0.045764 | Erythrocyt | AAK1       |
| 8658  | SMAP1     | 2.45E-06 | -0.40826 | 0.087 | 0.221 | 0.046019 | Erythrocyt | SMAP1      |
| 8659  | CASP1.2   | 2.50E-06 | -0.50537 | 0.102 | 0.239 | 0.046918 | Erythrocyt | CASP1      |
| 8660  | NDUFB3.2  | 2.51E-06 | -0.29619 | 0.218 | 0.402 | 0.047183 | Erythrocyt | NDUFB3     |
| 8661  | DEGS1.3   | 2.51E-06 | -0.39475 | 0.083 | 0.22  | 0.047222 | Erythrocyt | DEGS1      |
| 8662  | TMEM179   | 2.52E-06 | -0.34536 | 0.194 | 0.365 | 0.047279 | Erythrocyt | TMEM179B   |
| 8663  | LEPROTL1. | 2.53E-06 | -0.41116 | 0.32  | 0.502 | 0.047602 | Erythrocyt | LEPROTL1   |
| 8664  | CDK4.2    | 2.53E-06 | -0.34443 | 0.083 | 0.223 | 0.047605 | Erythrocyt | CDK4       |
| 8665  | ATP5PF.2  | 2.55E-06 | -0.29185 | 0.374 | 0.563 | 0.047878 | Erythrocyt | ATP5PF     |
| 8666  | ATRAID    | 2.57E-06 | -0.33719 | 0.17  | 0.335 | 0.048266 | Erythrocyt | ATRAID     |
| 8667  | TRMT1.1   | 2.57E-06 | -0.43202 | 0.107 | 0.247 | 0.04836  | Erythrocyt | TRMT1      |
| 8668  | ABI1.1    | 2.60E-06 | -0.40614 | 0.102 | 0.242 | 0.04889  | Erythrocyt | ABI1       |
| 8669  | LETMD1.2  | 2.61E-06 | -0.35543 | 0.068 | 0.203 | 0.049111 | Erythrocyt | LETMD1     |
| 8670  | RNF149.3  | 2.62E-06 | -0.48942 | 0.155 | 0.31  | 0.04913  | Erythrocyt | RNF149     |
| 8671  | SLFN5.4   | 2.64E-06 | -0.45076 | 0.112 | 0.258 | 0.049625 | Erythrocyt | SLFN5      |
| 9991  | PPBP      | 0        | 5.835472 | 0.837 | 0.018 | 0        | Platelet   | PPBP       |
| 9992  | TUBB1     | 0        | 4.25947  | 0.644 | 0.007 | 0        | Platelet   | TUBB1      |
| 9993  | HIST1H3H  | 0        | 3.782709 | 0.529 | 0.023 | 0        | Platelet   | HIST1H3H   |
| 9994  | PF4       | 0        | 3.777095 | 0.6   | 0.008 | 0        | Platelet   | PF4        |
| 9995  | TSC22D1.1 | 0        | 3.739959 | 0.434 | 0.023 | 0        | Platelet   | TSC22D1    |
| 9996  | GP9       | 0        | 3.701275 | 0.481 | 0.006 | 0        | Platelet   | GP9        |
| 9997  | GNG11.1   | 0        | 3.55149  | 0.62  | 0.024 | 0        | Platelet   | GNG11      |
| 9998  | CAVIN2.1  | 0        | 3.474415 | 0.644 | 0.008 | 0        | Platelet   | CAVIN2     |
| 9999  | ACRBP     | 0        | 3.194167 | 0.431 | 0.018 | 0        | Platelet   | ACRBP      |
| 10000 | SPARC.1   | 0        | 3.172276 | 0.634 | 0.008 | 0        | Platelet   | SPARC      |
| 10001 | MPIG6B    | 0        | 3.065043 | 0.498 | 0.006 | 0        | Platelet   | MPIG6B     |
| 10002 | CLU.1     | 0        | 3.04816  | 0.637 | 0.043 | 0        | Platelet   | CLU        |
| 10003 | MYL9      | 0        | 2.923521 | 0.539 | 0.008 | 0        | Platelet   | MYL9       |
| 10004 | TREML1    | 0        | 2.768338 | 0.492 | 0.005 | 0        | Platelet   | TREML1     |
| 10005 | CMTM5     | 0        | 2.66812  | 0.42  | 0.004 | 0        | Platelet   | CMTM5      |
| 10006 | TMEM40    | 0        | 2.548215 | 0.366 | 0.002 | 0        | Platelet   | TMEM40     |
| 10007 | NRGN.1    | 0        | 2.510363 | 0.597 | 0.024 | 0        | Platelet   | NRGN       |
| 10008 | PTCRA     | 0        | 2.473934 | 0.312 | 0.004 | 0        | Platelet   | PTCRA      |
| 10009 | F13A1.1   | 0        | 2.298422 | 0.447 | 0.018 | 0        | Platelet   | F13A1      |
| 10010 | C2orf88   | 0        | 2.226937 | 0.339 | 0.009 | 0        | Platelet   | C2orf88    |
| 10011 | ESAM      | 0        | 2.192243 | 0.322 | 0.009 | 0        | Platelet   | ESAM       |
| 10012 | PTGS1     | 0        | 2.12244  | 0.386 | 0.018 | 0        | Platelet   | PTGS1      |
| 10013 | ITGA2B    | 0        | 2.060461 | 0.376 | 0.003 | 0        | Platelet   | ITGA2B     |
| 10014 | AP003068. | 0        | 2.046992 | 0.417 | 0.023 | 0        | Platelet   | AP003068.2 |
| 10015 | SNCA.2    | 0        | 2.016619 | 0.386 | 0.016 | 0        | Platelet   | SNCA       |

|                  |   |          |       |       |            |            |
|------------------|---|----------|-------|-------|------------|------------|
| 10016 CLEC1B     | 0 | 1.943717 | 0.251 | 0.002 | 0 Platelet | CLEC1B     |
| 10017 GMPR.1     | 0 | 1.856971 | 0.332 | 0.009 | 0 Platelet | GMPR       |
| 10018 PF4V1      | 0 | 1.830841 | 0.353 | 0.004 | 0 Platelet | PF4V1      |
| 10019 FRMD3      | 0 | 1.747624 | 0.193 | 0.005 | 0 Platelet | FRMD3      |
| 10020 TRIM58.2   | 0 | 1.742492 | 0.302 | 0.013 | 0 Platelet | TRIM58     |
| 10021 GUCY1B1.1  | 0 | 1.663495 | 0.254 | 0.008 | 0 Platelet | GUCY1B1    |
| 10022 AP000547.1 | 0 | 1.496728 | 0.336 | 0.019 | 0 Platelet | AP000547.3 |
| 10023 MYLK       | 0 | 1.471348 | 0.261 | 0.002 | 0 Platelet | MYLK       |
| 10024 GP1BA      | 0 | 1.469495 | 0.217 | 0.001 | 0 Platelet | GP1BA      |
| 10025 PDGFA      | 0 | 1.445633 | 0.227 | 0.002 | 0 Platelet | PDGFA      |
| 10026 FAXDC2     | 0 | 1.404814 | 0.285 | 0.002 | 0 Platelet | FAXDC2     |
| 10027 NEXN       | 0 | 1.392709 | 0.224 | 0.008 | 0 Platelet | NEXN       |
| 10028 DMTN.1     | 0 | 1.380093 | 0.264 | 0.007 | 0 Platelet | DMTN       |
| 10029 TUBA8      | 0 | 1.371294 | 0.261 | 0.002 | 0 Platelet | TUBA8      |
| 10030 ALOX12     | 0 | 1.367156 | 0.254 | 0.001 | 0 Platelet | ALOX12     |
| 10031 AC147651.1 | 0 | 1.276079 | 0.247 | 0.003 | 0 Platelet | AC147651.1 |
| 10032 THBS1      | 0 | 1.275375 | 0.288 | 0.01  | 0 Platelet | THBS1      |
| 10033 ARHGAP6    | 0 | 1.272686 | 0.231 | 0.002 | 0 Platelet | ARHGAP6    |
| 10034 SMIM5      | 0 | 1.242171 | 0.237 | 0.004 | 0 Platelet | SMIM5      |
| 10035 SMOX.1     | 0 | 1.222959 | 0.214 | 0.007 | 0 Platelet | SMOX       |
| 10036 AP001189.1 | 0 | 1.182235 | 0.275 | 0.003 | 0 Platelet | AP001189.1 |
| 10037 LINC00989  | 0 | 1.152136 | 0.231 | 0.001 | 0 Platelet | LINC00989  |
| 10038 GATA1.1    | 0 | 1.135409 | 0.149 | 0.001 | 0 Platelet | GATA1      |
| 10039 CTTN       | 0 | 1.133336 | 0.193 | 0.002 | 0 Platelet | CTTN       |
| 10040 GFI1B.1    | 0 | 0.997793 | 0.183 | 0.002 | 0 Platelet | GFI1B      |
| 10041 STON2      | 0 | 0.996201 | 0.156 | 0.001 | 0 Platelet | STON2      |
| 10042 SH3BGRL2   | 0 | 0.994872 | 0.227 | 0.003 | 0 Platelet | SH3BGRL2   |
| 10043 GP6        | 0 | 0.927517 | 0.153 | 0.001 | 0 Platelet | GP6        |
| 10044 PRKAR2B    | 0 | 0.882222 | 0.234 | 0.006 | 0 Platelet | PRKAR2B    |
| 10045 SELP       | 0 | 0.881826 | 0.156 | 0.002 | 0 Platelet | SELP       |
| 10046 ELOVL7     | 0 | 0.879737 | 0.169 | 0.001 | 0 Platelet | ELOVL7     |
| 10047 AC090409.1 | 0 | 0.876306 | 0.132 | 0.001 | 0 Platelet | AC090409.1 |
| 10048 EGLN3      | 0 | 0.863608 | 0.163 | 0.004 | 0 Platelet | EGLN3      |
| 10049 TNFSF4.1   | 0 | 0.838967 | 0.136 | 0.002 | 0 Platelet | TNFSF4     |
| 10050 DNM3       | 0 | 0.836647 | 0.136 | 0.002 | 0 Platelet | DNM3       |
| 10051 MMRN1.1    | 0 | 0.833762 | 0.153 | 0.002 | 0 Platelet | MMRN1      |
| 10052 CALD1      | 0 | 0.816193 | 0.166 | 0.001 | 0 Platelet | CALD1      |
| 10053 LGALS12    | 0 | 0.786914 | 0.156 | 0.002 | 0 Platelet | LGALS12    |
| 10054 PDE5A      | 0 | 0.776152 | 0.149 | 0.001 | 0 Platelet | PDE5A      |
| 10055 PBX1.1     | 0 | 0.727886 | 0.129 | 0.001 | 0 Platelet | PBX1       |
| 10056 TFPI.1     | 0 | 0.723896 | 0.153 | 0.001 | 0 Platelet | TFPI       |
| 10057 TGFB11.1   | 0 | 0.721593 | 0.149 | 0.003 | 0 Platelet | TGFB11     |
| 10058 TAL1       | 0 | 0.719606 | 0.136 | 0.001 | 0 Platelet | TAL1       |
| 10059 LTBP1      | 0 | 0.701853 | 0.159 | 0.001 | 0 Platelet | LTBP1      |
| 10060 PROS1      | 0 | 0.676026 | 0.129 | 0.001 | 0 Platelet | PROS1      |
| 10061 XK         | 0 | 0.648412 | 0.105 | 0.001 | 0 Platelet | XK         |
| 10062 TRAPPC3L   | 0 | 0.645258 | 0.132 | 0.001 | 0 Platelet | TRAPPC3L   |

|       |           |           |          |       |       |           |          |            |
|-------|-----------|-----------|----------|-------|-------|-----------|----------|------------|
| 10063 | SPX       | 0         | 0.61963  | 0.125 | 0.001 | 0         | Platelet | SPX        |
| 10064 | ENKUR     | 0         | 0.613436 | 0.132 | 0.001 | 0         | Platelet | ENKUR      |
| 10065 | ABLIM3    | 0         | 0.577759 | 0.139 | 0.001 | 0         | Platelet | ABLIM3     |
| 10066 | AL731557. | 0         | 0.559997 | 0.146 | 0.001 | 0         | Platelet | AL731557.1 |
| 10067 | MFAP3L    | 0         | 0.559836 | 0.132 | 0.001 | 0         | Platelet | MFAP3L     |
| 10068 | MEIS1     | 0         | 0.547005 | 0.105 | 0.001 | 0         | Platelet | MEIS1      |
| 10069 | OSBP2     | 0         | 0.538979 | 0.115 | 0.001 | 0         | Platelet | OSBP2      |
| 10070 | RAB6B     | 0         | 0.538569 | 0.108 | 0.001 | 0         | Platelet | RAB6B      |
| 10071 | CTDSPL    | 0         | 0.517695 | 0.112 | 0.001 | 0         | Platelet | CTDSPL     |
| 10072 | ITGB3     | 0         | 0.514203 | 0.102 | 0.001 | 0         | Platelet | ITGB3      |
| 10073 | LGALSL    | 0         | 0.504353 | 0.108 | 0.001 | 0         | Platelet | LGALSL     |
| 10074 | TSPAN9    | 0         | 0.481987 | 0.119 | 0.001 | 0         | Platelet | TSPAN9     |
| 10075 | HGD       | 0         | 0.45966  | 0.112 | 0.001 | 0         | Platelet | HGD        |
| 10076 | RGS18.1   | 9.70E-307 | 2.861806 | 0.437 | 0.034 | 1.82E-302 | Platelet | RGS18      |
| 10077 | LCN2      | 1.09E-305 | 0.9679   | 0.146 | 0.003 | 2.05E-301 | Platelet | LCN2       |
| 10078 | GNAZ      | 2.93E-286 | 0.542114 | 0.115 | 0.002 | 5.51E-282 | Platelet | GNAZ       |
| 10079 | ABCC3     | 1.71E-282 | 1.154383 | 0.207 | 0.008 | 3.21E-278 | Platelet | ABCC3      |
| 10080 | PDZK1IP1. | 7.48E-270 | 0.438153 | 0.108 | 0.002 | 1.40E-265 | Platelet | PDZK1IP1   |
| 10081 | SCN1B     | 2.41E-252 | 0.814555 | 0.132 | 0.003 | 4.52E-248 | Platelet | SCN1B      |
| 10082 | RAB27B    | 5.24E-249 | 1.808388 | 0.251 | 0.013 | 9.85E-245 | Platelet | RAB27B     |
| 10083 | MAP3K7CL  | 1.73E-231 | 1.675312 | 0.322 | 0.024 | 3.25E-227 | Platelet | MAP3K7CL   |
| 10084 | CA2       | 2.13E-229 | 1.878124 | 0.234 | 0.013 | 3.99E-225 | Platelet | CA2        |
| 10085 | HIST1H2BJ | 1.04E-226 | 2.526718 | 0.281 | 0.019 | 1.95E-222 | Platelet | HIST1H2BJ  |
| 10086 | LMNA.1    | 3.19E-217 | 1.461998 | 0.254 | 0.016 | 5.99E-213 | Platelet | LMNA       |
| 10087 | ZNF185    | 4.08E-211 | 0.713503 | 0.173 | 0.007 | 7.67E-207 | Platelet | ZNF185     |
| 10088 | PGRMC1    | 3.74E-189 | 2.187786 | 0.519 | 0.078 | 7.03E-185 | Platelet | PGRMC1     |
| 10089 | MGLL.1    | 3.39E-187 | 1.028537 | 0.217 | 0.013 | 6.36E-183 | Platelet | MGLL       |
| 10090 | DAB2      | 1.60E-182 | 1.862464 | 0.237 | 0.016 | 3.00E-178 | Platelet | DAB2       |
| 10091 | MTURN.1   | 7.65E-180 | 0.627167 | 0.139 | 0.006 | 1.44E-175 | Platelet | MTURN      |
| 10092 | MMD       | 1.44E-178 | 2.733528 | 0.397 | 0.047 | 2.70E-174 | Platelet | MMD        |
| 10093 | SMIM3.2   | 6.24E-173 | 1.664368 | 0.346 | 0.037 | 1.17E-168 | Platelet | SMIM3      |
| 10094 | EGFL7.1   | 1.27E-171 | 0.902718 | 0.142 | 0.006 | 2.39E-167 | Platelet | EGFL7      |
| 10095 | MITF      | 1.08E-163 | 0.843794 | 0.115 | 0.004 | 2.03E-159 | Platelet | MITF       |
| 10096 | CDKN1A.1  | 2.66E-150 | 1.992982 | 0.356 | 0.044 | 5.00E-146 | Platelet | CDKN1A     |
| 10097 | VCL.1     | 9.08E-148 | 2.145912 | 0.447 | 0.071 | 1.71E-143 | Platelet | VCL        |
| 10098 | MAP1A.1   | 4.17E-146 | 0.529918 | 0.108 | 0.004 | 7.84E-142 | Platelet | MAP1A      |
| 10099 | JAM3      | 2.69E-144 | 0.737984 | 0.169 | 0.01  | 5.04E-140 | Platelet | JAM3       |
| 10100 | INKA2     | 6.61E-141 | 0.686489 | 0.108 | 0.004 | 1.24E-136 | Platelet | INKA2      |
| 10101 | HIST1H2AC | 9.64E-136 | 3.968754 | 0.695 | 0.197 | 1.81E-131 | Platelet | HIST1H2AC  |
| 10102 | HBD.1     | 3.16E-135 | 0.528422 | 0.102 | 0.004 | 5.94E-131 | Platelet | HBD        |
| 10103 | CCL5.6    | 3.62E-132 | 1.304054 | 0.692 | 0.145 | 6.79E-128 | Platelet | CCL5       |
| 10104 | SENCR     | 1.25E-125 | 0.883991 | 0.156 | 0.01  | 2.35E-121 | Platelet | SENCR      |
| 10105 | FHL1.1    | 1.42E-123 | 1.059853 | 0.251 | 0.026 | 2.67E-119 | Platelet | FHL1       |
| 10106 | PARVB.3   | 5.76E-118 | 2.408807 | 0.471 | 0.096 | 1.08E-113 | Platelet | PARVB      |
| 10107 | BEX3.5    | 6.93E-118 | 2.358398 | 0.647 | 0.179 | 1.30E-113 | Platelet | BEX3       |
| 10108 | Mar-02    | 4.51E-117 | 1.369469 | 0.302 | 0.04  | 8.46E-113 | Platelet | Mar-02     |
| 10109 | TPM1.1    | 1.95E-116 | 1.524795 | 0.292 | 0.037 | 3.67E-112 | Platelet | TPM1       |



|       |            |           |          |       |       |           |          |            |
|-------|------------|-----------|----------|-------|-------|-----------|----------|------------|
| 10110 | CLDN5      | 2.02E-109 | 0.762407 | 0.132 | 0.008 | 3.80E-105 | Platelet | CLDN5      |
| 10111 | CTSA.3     | 4.20E-109 | 2.457244 | 0.658 | 0.2   | 7.89E-105 | Platelet | CTSA       |
| 10112 | ARHGAP18   | 1.02E-108 | 1.319615 | 0.264 | 0.033 | 1.92E-104 | Platelet | ARHGAP18   |
| 10113 | MPP1.4     | 1.52E-108 | 2.650355 | 0.447 | 0.094 | 2.85E-104 | Platelet | MPP1       |
| 10114 | SLC40A1.2  | 2.38E-105 | 1.792597 | 0.38  | 0.067 | 4.48E-101 | Platelet | SLC40A1    |
| 10115 | PLA2G12A   | 1.49E-95  | 1.697866 | 0.353 | 0.064 | 2.80E-91  | Platelet | PLA2G12A   |
| 10116 | ANXA3.1    | 1.07E-93  | 0.701626 | 0.169 | 0.016 | 2.00E-89  | Platelet | ANXA3      |
| 10117 | RUFY1      | 3.32E-89  | 1.911191 | 0.322 | 0.058 | 6.23E-85  | Platelet | RUFY1      |
| 10118 | GRAP2.5    | 3.49E-85  | 2.180028 | 0.508 | 0.14  | 6.56E-81  | Platelet | GRAP2      |
| 10119 | SMIM1.2    | 3.52E-80  | 0.634097 | 0.163 | 0.017 | 6.61E-76  | Platelet | SMIM1      |
| 10120 | TIMP1.4    | 1.64E-79  | 1.758147 | 0.664 | 0.234 | 3.07E-75  | Platelet | TIMP1      |
| 10121 | LIMS1.4    | 6.93E-75  | 2.23581  | 0.478 | 0.139 | 1.30E-70  | Platelet | LIMS1      |
| 10122 | IGF2BP3    | 9.52E-65  | 0.618096 | 0.146 | 0.017 | 1.79E-60  | Platelet | IGF2BP3    |
| 10123 | TMEM140    | 9.57E-64  | 1.525931 | 0.264 | 0.052 | 1.80E-59  | Platelet | TMEM140    |
| 10124 | AC008763.1 | 9.88E-64  | 0.63682  | 0.129 | 0.013 | 1.86E-59  | Platelet | AC008763.1 |
| 10125 | FTH1.4     | 2.98E-63  | 1.268898 | 1     | 0.982 | 5.59E-59  | Platelet | FTH1       |
| 10126 | TPM4.5     | 3.38E-63  | 2.504902 | 0.59  | 0.242 | 6.34E-59  | Platelet | TPM4       |
| 10127 | STOM.3     | 1.27E-62  | 2.073149 | 0.397 | 0.11  | 2.39E-58  | Platelet | STOM       |
| 10128 | SSX2IP     | 9.04E-62  | 0.711316 | 0.156 | 0.02  | 1.70E-57  | Platelet | SSX2IP     |
| 10129 | CTNNAL1    | 5.63E-61  | 0.522329 | 0.108 | 0.01  | 1.06E-56  | Platelet | CTNNAL1    |
| 10130 | MINDY1     | 5.11E-59  | 0.841855 | 0.163 | 0.022 | 9.59E-55  | Platelet | MINDY1     |
| 10131 | RAB32.1    | 7.25E-59  | 1.127453 | 0.224 | 0.04  | 1.36E-54  | Platelet | RAB32      |
| 10132 | NCOA4.4    | 7.61E-59  | 2.192631 | 0.597 | 0.26  | 1.43E-54  | Platelet | NCOA4      |
| 10133 | HIST1H2BC  | 1.77E-58  | 1.580599 | 0.224 | 0.04  | 3.32E-54  | Platelet | HIST1H2BC  |
| 10134 | PDLIM1.5   | 7.00E-58  | 1.953797 | 0.508 | 0.181 | 1.31E-53  | Platelet | PDLIM1     |
| 10135 | ENDOD1     | 2.16E-57  | 1.073331 | 0.237 | 0.045 | 4.07E-53  | Platelet | ENDOD1     |
| 10136 | RGS10.4    | 2.73E-57  | 1.967448 | 0.837 | 0.529 | 5.14E-53  | Platelet | RGS10      |
| 10137 | CD9.1      | 7.88E-57  | 1.34383  | 0.315 | 0.075 | 1.48E-52  | Platelet | CD9        |
| 10138 | TUBA4A.4   | 1.50E-55  | 2.157312 | 0.729 | 0.407 | 2.82E-51  | Platelet | TUBA4A     |
| 10139 | GADD45A.   | 8.58E-52  | 0.752361 | 0.166 | 0.026 | 1.61E-47  | Platelet | GADD45A    |
| 10140 | AP001636.3 | 2.48E-51  | 0.491508 | 0.115 | 0.013 | 4.65E-47  | Platelet | AP001636.3 |
| 10141 | FAH.1      | 3.95E-51  | 0.772135 | 0.166 | 0.026 | 7.42E-47  | Platelet | FAH        |
| 10142 | RSU1.1     | 1.04E-50  | 1.771263 | 0.556 | 0.245 | 1.96E-46  | Platelet | RSU1       |
| 10143 | F2R.1      | 1.38E-50  | 0.804698 | 0.153 | 0.022 | 2.59E-46  | Platelet | F2R        |
| 10144 | FRMD4B.1   | 1.38E-50  | 0.997797 | 0.122 | 0.015 | 2.60E-46  | Platelet | FRMD4B     |
| 10145 | INKA1.1    | 1.47E-50  | 0.958554 | 0.163 | 0.025 | 2.76E-46  | Platelet | INKA1      |
| 10146 | PADI4.1    | 2.73E-50  | 1.038245 | 0.254 | 0.056 | 5.13E-46  | Platelet | PADI4      |
| 10147 | CD226      | 4.36E-50  | 0.786895 | 0.21  | 0.04  | 8.20E-46  | Platelet | CD226      |
| 10148 | CALM3.2    | 2.21E-49  | 1.529723 | 0.783 | 0.508 | 4.15E-45  | Platelet | CALM3      |
| 10149 | CMIP.1     | 2.63E-48  | 1.057631 | 0.237 | 0.052 | 4.93E-44  | Platelet | CMIP       |
| 10150 | SPHK1      | 3.56E-48  | 0.494563 | 0.102 | 0.011 | 6.70E-44  | Platelet | SPHK1      |
| 10151 | HIST1H2AC  | 3.99E-48  | 0.880573 | 0.18  | 0.032 | 7.50E-44  | Platelet | HIST1H2AG  |
| 10152 | RDH11      | 1.03E-47  | 1.237511 | 0.366 | 0.113 | 1.93E-43  | Platelet | RDH11      |
| 10153 | EHD3       | 4.20E-47  | 0.550978 | 0.139 | 0.02  | 7.88E-43  | Platelet | EHD3       |
| 10154 | YWHAH.3    | 1.46E-46  | 1.668016 | 0.403 | 0.142 | 2.74E-42  | Platelet | YWHAH      |
| 10155 | RAB11A.3   | 5.57E-46  | 2.055465 | 0.627 | 0.313 | 1.05E-41  | Platelet | RAB11A     |
| 10156 | HIST1H2BH  | 8.50E-46  | 0.577607 | 0.102 | 0.012 | 1.60E-41  | Platelet | HIST1H2BH  |

|       |           |          |          |       |       |          |          |           |
|-------|-----------|----------|----------|-------|-------|----------|----------|-----------|
| 10157 | PTPN18.1  | 1.17E-45 | 1.607526 | 0.366 | 0.118 | 2.20E-41 | Platelet | PTPN18    |
| 10158 | MAX.3     | 1.28E-45 | 1.695867 | 0.675 | 0.384 | 2.41E-41 | Platelet | MAX       |
| 10159 | TAGLN2.5  | 1.71E-45 | 1.87314  | 0.922 | 0.771 | 3.21E-41 | Platelet | TAGLN2    |
| 10160 | ACTN1.5   | 1.77E-45 | 1.427789 | 0.573 | 0.256 | 3.33E-41 | Platelet | ACTN1     |
| 10161 | PTK2      | 2.51E-43 | 0.705627 | 0.169 | 0.031 | 4.71E-39 | Platelet | PTK2      |
| 10162 | PTGIR     | 1.79E-42 | 0.848389 | 0.132 | 0.02  | 3.37E-38 | Platelet | PTGIR     |
| 10163 | ACTR3B    | 5.54E-42 | 0.513491 | 0.139 | 0.022 | 1.04E-37 | Platelet | ACTR3B    |
| 10164 | TLN1.4    | 8.13E-42 | 1.9762   | 0.519 | 0.239 | 1.53E-37 | Platelet | TLN1      |
| 10165 | CDK2AP1.1 | 1.63E-41 | 0.495193 | 0.132 | 0.02  | 3.05E-37 | Platelet | CDK2AP1   |
| 10166 | OST4.3    | 2.16E-41 | 1.254908 | 0.963 | 0.837 | 4.06E-37 | Platelet | OST4      |
| 10167 | MFSD1.3   | 2.71E-40 | 1.533977 | 0.447 | 0.188 | 5.09E-36 | Platelet | MFSD1     |
| 10168 | PRUNE1    | 5.41E-40 | 0.926246 | 0.247 | 0.064 | 1.02E-35 | Platelet | PRUNE1    |
| 10169 | MOB1B     | 1.35E-39 | 0.803007 | 0.146 | 0.025 | 2.54E-35 | Platelet | MOB1B     |
| 10170 | HEMGN.1   | 1.63E-39 | 0.469464 | 0.119 | 0.017 | 3.06E-35 | Platelet | HEMGN     |
| 10171 | EIF2AK1.1 | 5.12E-39 | 1.627666 | 0.407 | 0.159 | 9.61E-35 | Platelet | EIF2AK1   |
| 10172 | GTPBP2    | 1.34E-38 | 0.587904 | 0.125 | 0.02  | 2.52E-34 | Platelet | GTPBP2    |
| 10173 | ABHD4     | 3.02E-38 | 0.523685 | 0.119 | 0.018 | 5.68E-34 | Platelet | ABHD4     |
| 10174 | AGPAT1    | 4.28E-38 | 0.79843  | 0.295 | 0.089 | 8.05E-34 | Platelet | AGPAT1    |
| 10175 | KIF2A.4   | 4.75E-38 | 1.668081 | 0.583 | 0.308 | 8.93E-34 | Platelet | KIF2A     |
| 10176 | CD151.2   | 6.06E-38 | 1.116909 | 0.322 | 0.104 | 1.14E-33 | Platelet | CD151     |
| 10177 | NAP1L1.3  | 9.59E-38 | 1.749805 | 0.715 | 0.457 | 1.80E-33 | Platelet | NAP1L1    |
| 10178 | SIAE      | 1.00E-37 | 0.484153 | 0.102 | 0.014 | 1.89E-33 | Platelet | SIAE      |
| 10179 | TUBA1C.2  | 2.08E-37 | 1.357299 | 0.312 | 0.101 | 3.91E-33 | Platelet | TUBA1C    |
| 10180 | PSTPIP2.1 | 3.90E-37 | 0.876695 | 0.176 | 0.037 | 7.32E-33 | Platelet | PSTPIP2   |
| 10181 | HIST1H4H  | 1.27E-36 | 1.654301 | 0.132 | 0.022 | 2.39E-32 | Platelet | HIST1H4H  |
| 10182 | ITM2B.5   | 1.69E-35 | 1.059718 | 0.976 | 0.884 | 3.18E-31 | Platelet | ITM2B     |
| 10183 | CORO1C.1  | 1.69E-35 | 0.845676 | 0.18  | 0.04  | 3.18E-31 | Platelet | CORO1C    |
| 10184 | BCL2L1.2  | 1.72E-35 | 1.049486 | 0.271 | 0.081 | 3.23E-31 | Platelet | BCL2L1    |
| 10185 | P2RX1.2   | 3.64E-35 | 0.78976  | 0.186 | 0.043 | 6.84E-31 | Platelet | P2RX1     |
| 10186 | GSN.2     | 3.87E-35 | 1.239633 | 0.247 | 0.07  | 7.27E-31 | Platelet | GSN       |
| 10187 | SLA2.1    | 1.03E-34 | 0.695338 | 0.227 | 0.06  | 1.94E-30 | Platelet | SLA2      |
| 10188 | WBP2.1    | 2.35E-34 | 1.228026 | 0.553 | 0.28  | 4.41E-30 | Platelet | WBP2      |
| 10189 | RNF11.1   | 2.77E-34 | 0.775853 | 0.268 | 0.08  | 5.21E-30 | Platelet | RNF11     |
| 10190 | NT5C3A.2  | 1.31E-33 | 2.111913 | 0.454 | 0.21  | 2.47E-29 | Platelet | NT5C3A    |
| 10191 | ETFA.1    | 1.51E-33 | 1.661221 | 0.481 | 0.237 | 2.83E-29 | Platelet | ETFA      |
| 10192 | HIST1H2BK | 4.23E-33 | 0.905102 | 0.312 | 0.104 | 7.94E-29 | Platelet | HIST1H2BK |
| 10193 | TMEM91.1  | 4.60E-33 | 0.781612 | 0.197 | 0.048 | 8.65E-29 | Platelet | TMEM91    |
| 10194 | PKM.3     | 5.75E-33 | 1.302229 | 0.824 | 0.612 | 1.08E-28 | Platelet | PKM       |
| 10195 | ILK.4     | 1.29E-32 | 1.832967 | 0.505 | 0.257 | 2.41E-28 | Platelet | ILK       |
| 10196 | ADIPOR1.1 | 1.79E-31 | 1.470584 | 0.495 | 0.251 | 3.37E-27 | Platelet | ADIPOR1   |
| 10197 | ANO6.1    | 2.41E-31 | 0.836663 | 0.241 | 0.072 | 4.52E-27 | Platelet | ANO6      |
| 10198 | PRDX6.1   | 3.56E-31 | 1.254441 | 0.702 | 0.448 | 6.69E-27 | Platelet | PRDX6     |
| 10199 | OAZ1.4    | 3.63E-31 | 1.598936 | 0.98  | 0.938 | 6.82E-27 | Platelet | OAZ1      |
| 10200 | CYB5R3.2  | 1.47E-30 | 1.389703 | 0.478 | 0.24  | 2.76E-26 | Platelet | CYB5R3    |
| 10201 | PRKAR1B   | 1.61E-30 | 0.803564 | 0.271 | 0.089 | 3.02E-26 | Platelet | PRKAR1B   |
| 10202 | CD99.4    | 8.50E-30 | 1.134417 | 0.797 | 0.539 | 1.60E-25 | Platelet | CD99      |
| 10203 | TM6SF1    | 2.55E-29 | 0.427724 | 0.112 | 0.02  | 4.78E-25 | Platelet | TM6SF1    |

|       |           |          |          |       |       |          |          |             |
|-------|-----------|----------|----------|-------|-------|----------|----------|-------------|
| 10204 | DAP       | 2.98E-29 | 0.868431 | 0.322 | 0.122 | 5.60E-25 | Platelet | DAP         |
| 10205 | PIP4P2.1  | 7.75E-29 | 0.898082 | 0.244 | 0.077 | 1.46E-24 | Platelet | PIP4P2      |
| 10206 | SNN.1     | 1.05E-28 | 0.888126 | 0.22  | 0.066 | 1.98E-24 | Platelet | SNN         |
| 10207 | DAPP1.1   | 1.24E-28 | 0.998353 | 0.278 | 0.097 | 2.33E-24 | Platelet | DAPP1       |
| 10208 | NFE2.3    | 1.71E-28 | 1.889455 | 0.207 | 0.06  | 3.22E-24 | Platelet | NFE2        |
| 10209 | CD68.5    | 2.84E-28 | 0.682597 | 0.302 | 0.101 | 5.34E-24 | Platelet | CD68        |
| 10210 | XPNPEP1   | 3.87E-28 | 1.065945 | 0.275 | 0.097 | 7.27E-24 | Platelet | XPNPEP1     |
| 10211 | CARD19.2  | 1.69E-27 | 1.223829 | 0.261 | 0.09  | 3.18E-23 | Platelet | CARD19      |
| 10212 | WDR1.2    | 2.38E-27 | 1.200859 | 0.715 | 0.506 | 4.47E-23 | Platelet | WDR1        |
| 10213 | MYL12A.5  | 3.82E-27 | 0.893366 | 0.986 | 0.946 | 7.17E-23 | Platelet | MYL12A      |
| 10214 | FERMT3.4  | 4.94E-27 | 1.77987  | 0.597 | 0.371 | 9.29E-23 | Platelet | FERMT3      |
| 10215 | PYGL.2    | 2.08E-26 | 0.848142 | 0.176 | 0.047 | 3.90E-22 | Platelet | PYGL        |
| 10216 | RIOK3.2   | 3.40E-26 | 1.317083 | 0.4   | 0.185 | 6.38E-22 | Platelet | RIOK3       |
| 10217 | ODC1.3    | 4.37E-26 | 1.12182  | 0.363 | 0.161 | 8.20E-22 | Platelet | ODC1        |
| 10218 | MLH3      | 9.67E-26 | 0.573945 | 0.159 | 0.04  | 1.82E-21 | Platelet | MLH3        |
| 10219 | RPL37A.3  | 1.24E-25 | -0.75148 | 0.634 | 0.839 | 2.32E-21 | Platelet | RPL37A      |
| 10220 | GPX4.4    | 1.26E-25 | 1.338128 | 0.814 | 0.602 | 2.36E-21 | Platelet | GPX4        |
| 10221 | PNMA1.1   | 3.18E-25 | 0.687518 | 0.186 | 0.053 | 5.98E-21 | Platelet | PNMA1       |
| 10222 | TUBB4B.2  | 3.60E-25 | 0.917958 | 0.42  | 0.201 | 6.75E-21 | Platelet | TUBB4B      |
| 10223 | TST.1     | 5.92E-25 | 0.557581 | 0.125 | 0.028 | 1.11E-20 | Platelet | TST         |
| 10224 | RPL37.5   | 5.94E-25 | -0.59357 | 0.831 | 0.981 | 1.12E-20 | Platelet | RPL37       |
| 10225 | TMBIM1.1  | 8.58E-25 | 1.278002 | 0.397 | 0.19  | 1.61E-20 | Platelet | TMBIM1      |
| 10226 | RNF24.2   | 8.62E-25 | 0.935321 | 0.183 | 0.053 | 1.62E-20 | Platelet | RNF24       |
| 10227 | YWHAZ.5   | 1.24E-24 | 0.959643 | 0.942 | 0.803 | 2.32E-20 | Platelet | YWHAZ       |
| 10228 | DERA      | 1.29E-24 | 1.146782 | 0.292 | 0.116 | 2.42E-20 | Platelet | DERA        |
| 10229 | LAMTOR1.  | 1.50E-24 | 1.243925 | 0.654 | 0.445 | 2.82E-20 | Platelet | LAMTOR1     |
| 10230 | H3F3A.3   | 1.81E-24 | 1.125292 | 0.993 | 0.95  | 3.40E-20 | Platelet | H3F3A       |
| 10231 | PPP1R14A. | 5.97E-24 | 0.726317 | 0.261 | 0.092 | 1.12E-19 | Platelet | PPP1R14A    |
| 10232 | TPST2.3   | 4.97E-23 | 1.487673 | 0.447 | 0.237 | 9.33E-19 | Platelet | TPST2       |
| 10233 | MIR4435-2 | 6.75E-23 | 0.717456 | 0.207 | 0.067 | 1.27E-18 | Platelet | MIR4435-2HG |
| 10234 | SPINT2.4  | 7.08E-23 | 0.98056  | 0.478 | 0.265 | 1.33E-18 | Platelet | SPINT2      |
| 10235 | ABO       | 7.60E-23 | 0.409841 | 0.119 | 0.026 | 1.43E-18 | Platelet | ABO         |
| 10236 | HK1.2     | 1.79E-22 | 0.890436 | 0.339 | 0.153 | 3.37E-18 | Platelet | HK1         |
| 10237 | ASAH1.3   | 3.38E-22 | 1.103856 | 0.508 | 0.293 | 6.35E-18 | Platelet | ASAH1       |
| 10238 | AIG1      | 3.92E-22 | 0.572736 | 0.18  | 0.054 | 7.37E-18 | Platelet | AIG1        |
| 10239 | HLA-E.5   | 4.07E-22 | 0.653985 | 0.99  | 0.956 | 7.64E-18 | Platelet | HLA-E       |
| 10240 | RAB31.3   | 5.74E-22 | 0.829747 | 0.278 | 0.108 | 1.08E-17 | Platelet | RAB31       |
| 10241 | NCK1-DT   | 7.13E-22 | 0.492824 | 0.105 | 0.022 | 1.34E-17 | Platelet | NCK1-DT     |
| 10242 | APP.2     | 8.53E-22 | 0.679463 | 0.264 | 0.101 | 1.60E-17 | Platelet | APP         |
| 10243 | LEPROT.2  | 1.23E-21 | 0.883217 | 0.268 | 0.107 | 2.30E-17 | Platelet | LEPROT      |
| 10244 | MCTP1.1   | 2.19E-21 | 0.351615 | 0.105 | 0.023 | 4.12E-17 | Platelet | MCTP1       |
| 10245 | MTHFD2L.  | 2.99E-21 | 0.657493 | 0.231 | 0.083 | 5.61E-17 | Platelet | MTHFD2L     |
| 10246 | MCUR1.1   | 4.30E-21 | 0.653414 | 0.261 | 0.103 | 8.08E-17 | Platelet | MCUR1       |
| 10247 | TUBA1B.4  | 6.83E-21 | 0.727944 | 0.753 | 0.516 | 1.28E-16 | Platelet | TUBA1B      |
| 10248 | SWI5      | 9.10E-21 | 0.663027 | 0.22  | 0.079 | 1.71E-16 | Platelet | SWI5        |
| 10249 | VDAC3.3   | 1.17E-20 | 1.033382 | 0.505 | 0.307 | 2.19E-16 | Platelet | VDAC3       |
| 10250 | RPL34.5   | 1.95E-20 | -0.51288 | 0.868 | 0.996 | 3.67E-16 | Platelet | RPL34       |

|       |           |          |          |       |       |          |          |           |
|-------|-----------|----------|----------|-------|-------|----------|----------|-----------|
| 10251 | LAT.5     | 2.12E-20 | 0.818159 | 0.654 | 0.423 | 3.99E-16 | Platelet | LAT       |
| 10252 | RPL36A.5  | 2.37E-20 | -0.72816 | 0.593 | 0.805 | 4.45E-16 | Platelet | RPL36A    |
| 10253 | RPS29.3   | 2.93E-20 | -0.78509 | 0.614 | 0.832 | 5.51E-16 | Platelet | RPS29     |
| 10254 | CRAT      | 3.05E-20 | 0.443259 | 0.142 | 0.039 | 5.72E-16 | Platelet | CRAT      |
| 10255 | MYL6.4    | 3.10E-20 | 1.226305 | 0.966 | 0.947 | 5.82E-16 | Platelet | MYL6      |
| 10256 | NPTN.3    | 3.46E-20 | 1.08219  | 0.383 | 0.199 | 6.50E-16 | Platelet | NPTN      |
| 10257 | HIST1H2AE | 3.73E-20 | 0.58054  | 0.105 | 0.024 | 7.00E-16 | Platelet | HIST1H2AE |
| 10258 | ACTB.5    | 4.40E-20 | 0.891935 | 1     | 0.999 | 8.27E-16 | Platelet | ACTB      |
| 10259 | RPS27.5   | 4.80E-20 | -0.52117 | 0.919 | 0.994 | 9.03E-16 | Platelet | RPS27     |
| 10260 | HIST1H1C. | 5.01E-20 | 1.275947 | 0.346 | 0.166 | 9.41E-16 | Platelet | HIST1H1C  |
| 10261 | RAP1B.4   | 1.20E-19 | 1.907505 | 0.756 | 0.624 | 2.26E-15 | Platelet | RAP1B     |
| 10262 | WRB       | 1.52E-19 | 0.607709 | 0.207 | 0.074 | 2.86E-15 | Platelet | WRB       |
| 10263 | TMSB10.4  | 1.61E-19 | -0.43659 | 0.912 | 0.998 | 3.02E-15 | Platelet | TMSB10    |
| 10264 | CLIC4.2   | 3.56E-19 | 0.564502 | 0.166 | 0.052 | 6.68E-15 | Platelet | CLIC4     |
| 10265 | CCND3.5   | 4.23E-19 | 1.207143 | 0.739 | 0.586 | 7.94E-15 | Platelet | CCND3     |
| 10266 | KIAA0513. | 4.52E-19 | 0.594196 | 0.119 | 0.031 | 8.49E-15 | Platelet | KIAA0513  |
| 10267 | SNAP23.3  | 4.84E-19 | 0.844972 | 0.468 | 0.27  | 9.09E-15 | Platelet | SNAP23    |
| 10268 | SH3BGRL3  | 6.85E-19 | 0.877666 | 0.983 | 0.94  | 1.29E-14 | Platelet | SH3BGRL3  |
| 10269 | SOD2.4    | 7.24E-19 | 0.821666 | 0.376 | 0.191 | 1.36E-14 | Platelet | SOD2      |
| 10270 | IFRD1     | 7.86E-19 | 1.29256  | 0.278 | 0.122 | 1.48E-14 | Platelet | IFRD1     |
| 10271 | ARF1.3    | 2.00E-18 | 1.001853 | 0.756 | 0.626 | 3.75E-14 | Platelet | ARF1      |
| 10272 | SERPINE2. | 3.63E-18 | 0.433705 | 0.149 | 0.045 | 6.83E-14 | Platelet | SERPINE2  |
| 10273 | TBXA2R    | 4.37E-18 | 0.379577 | 0.122 | 0.032 | 8.21E-14 | Platelet | TBXA2R    |
| 10274 | H2AFJ.2   | 4.42E-18 | 1.134162 | 0.397 | 0.216 | 8.30E-14 | Platelet | H2AFJ     |
| 10275 | ITGB1.4   | 5.20E-18 | 0.808123 | 0.386 | 0.2   | 9.77E-14 | Platelet | ITGB1     |
| 10276 | NORAD.3   | 5.26E-18 | 0.987582 | 0.315 | 0.153 | 9.89E-14 | Platelet | NORAD     |
| 10277 | ATP5F1E.4 | 7.69E-18 | -0.43957 | 0.932 | 0.973 | 1.45E-13 | Platelet | ATP5F1E   |
| 10278 | RPS21.5   | 8.39E-18 | -0.48563 | 0.851 | 0.988 | 1.58E-13 | Platelet | RPS21     |
| 10279 | CAPZA2.4  | 1.29E-17 | 1.052381 | 0.546 | 0.347 | 2.43E-13 | Platelet | CAPZA2    |
| 10280 | TMEM50A   | 1.93E-17 | 0.839145 | 0.664 | 0.481 | 3.62E-13 | Platelet | TMEM50A   |
| 10281 | TXNL4B    | 2.32E-17 | 0.537149 | 0.105 | 0.026 | 4.36E-13 | Platelet | TXNL4B    |
| 10282 | VIM-AS1   | 2.32E-17 | 0.498175 | 0.186 | 0.066 | 4.36E-13 | Platelet | VIM-AS1   |
| 10283 | RPLP1.5   | 3.35E-17 | -0.37001 | 0.953 | 0.998 | 6.29E-13 | Platelet | RPLP1     |
| 10284 | R3HDM4.1  | 4.17E-17 | 0.851795 | 0.553 | 0.353 | 7.84E-13 | Platelet | R3HDM4    |
| 10285 | SLC44A2.4 | 4.45E-17 | 0.70326  | 0.532 | 0.334 | 8.36E-13 | Platelet | SLC44A2   |
| 10286 | CLCN3     | 4.94E-17 | 0.599501 | 0.203 | 0.077 | 9.28E-13 | Platelet | CLCN3     |
| 10287 | MAPRE2.4  | 5.62E-17 | 0.899011 | 0.369 | 0.199 | 1.06E-12 | Platelet | MAPRE2    |
| 10288 | TAX1BP3   | 6.10E-17 | 0.367753 | 0.122 | 0.034 | 1.15E-12 | Platelet | TAX1BP3   |
| 10289 | RPL35.4   | 6.59E-17 | -0.41523 | 0.861 | 0.983 | 1.24E-12 | Platelet | RPL35     |
| 10290 | ANKRD28.  | 7.82E-17 | 0.382228 | 0.108 | 0.028 | 1.47E-12 | Platelet | ANKRD28   |
| 10291 | RPLP2.4   | 8.17E-17 | -0.45877 | 0.82  | 0.97  | 1.54E-12 | Platelet | RPLP2     |
| 10292 | RPL27.3   | 9.06E-17 | -0.44222 | 0.824 | 0.953 | 1.70E-12 | Platelet | RPL27     |
| 10293 | RPS28.5   | 9.07E-17 | -0.42191 | 0.902 | 0.995 | 1.70E-12 | Platelet | RPS28     |
| 10294 | ATP2C1.1  | 1.09E-16 | 0.511198 | 0.142 | 0.044 | 2.05E-12 | Platelet | ATP2C1    |
| 10295 | RAB4A.1   | 1.43E-16 | 0.764148 | 0.346 | 0.18  | 2.68E-12 | Platelet | RAB4A     |
| 10296 | CNST.3    | 1.44E-16 | 1.344636 | 0.322 | 0.163 | 2.70E-12 | Platelet | CNST      |
| 10297 | FAM110A.  | 1.47E-16 | 1.332459 | 0.295 | 0.141 | 2.76E-12 | Platelet | FAM110A   |

|       |            |          |          |       |       |          |          |          |
|-------|------------|----------|----------|-------|-------|----------|----------|----------|
| 10298 | RAB37.4    | 1.55E-16 | 0.685801 | 0.315 | 0.152 | 2.92E-12 | Platelet | RAB37    |
| 10299 | KIFAP3     | 1.56E-16 | 0.521217 | 0.207 | 0.079 | 2.94E-12 | Platelet | KIFAP3   |
| 10300 | RPS14.5    | 2.13E-16 | -0.41541 | 0.878 | 0.992 | 3.99E-12 | Platelet | RPS14    |
| 10301 | RPL39.4    | 2.21E-16 | -0.50951 | 0.888 | 0.998 | 4.16E-12 | Platelet | RPL39    |
| 10302 | CYB5R1     | 3.52E-16 | 0.767119 | 0.244 | 0.107 | 6.61E-12 | Platelet | CYB5R1   |
| 10303 | S100A11.4  | 4.26E-16 | -1.93174 | 0.271 | 0.47  | 8.01E-12 | Platelet | S100A11  |
| 10304 | UBL4A      | 4.74E-16 | 0.67526  | 0.268 | 0.124 | 8.90E-12 | Platelet | UBL4A    |
| 10305 | YPEL5.1    | 4.76E-16 | 0.980029 | 0.431 | 0.257 | 8.94E-12 | Platelet | YPEL5    |
| 10306 | C12orf75.5 | 4.98E-16 | 0.867437 | 0.38  | 0.2   | 9.35E-12 | Platelet | C12orf75 |
| 10307 | MTPN.5     | 5.19E-16 | 0.74642  | 0.539 | 0.352 | 9.76E-12 | Platelet | MTPN     |
| 10308 | PFDN5.2    | 6.31E-16 | -0.3967  | 0.861 | 0.979 | 1.19E-11 | Platelet | PFDN5    |
| 10309 | SLC39A3.1  | 6.59E-16 | 0.461996 | 0.197 | 0.075 | 1.24E-11 | Platelet | SLC39A3  |
| 10310 | SSBP2.4    | 7.52E-16 | 0.725953 | 0.278 | 0.129 | 1.41E-11 | Platelet | SSBP2    |
| 10311 | GLA.1      | 8.06E-16 | 0.669426 | 0.146 | 0.049 | 1.51E-11 | Platelet | GLA      |
| 10312 | AKIRIN2.3  | 8.55E-16 | 1.209906 | 0.366 | 0.206 | 1.61E-11 | Platelet | AKIRIN2  |
| 10313 | TLK1.1     | 1.06E-15 | 0.841425 | 0.329 | 0.171 | 1.99E-11 | Platelet | TLK1     |
| 10314 | RPL21.3    | 1.23E-15 | -0.42994 | 0.858 | 0.97  | 2.31E-11 | Platelet | RPL21    |
| 10315 | STRN4.1    | 1.38E-15 | 0.501709 | 0.132 | 0.041 | 2.59E-11 | Platelet | STRN4    |
| 10316 | MT-ND3.3   | 1.40E-15 | -0.54121 | 0.854 | 0.972 | 2.63E-11 | Platelet | MT-ND3   |
| 10317 | CYBA.6     | 1.45E-15 | -0.74812 | 0.566 | 0.732 | 2.72E-11 | Platelet | CYBA     |
| 10318 | LDLRAP1.5  | 1.62E-15 | 0.55256  | 0.505 | 0.299 | 3.04E-11 | Platelet | LDLRAP1  |
| 10319 | SERF2.4    | 3.34E-15 | 0.495488 | 1     | 0.987 | 6.27E-11 | Platelet | SERF2    |
| 10320 | RPSA.3     | 5.82E-15 | -0.43775 | 0.807 | 0.94  | 1.09E-10 | Platelet | RPSA     |
| 10321 | PTTG1IP.3  | 6.06E-15 | 0.720083 | 0.295 | 0.145 | 1.14E-10 | Platelet | PTTG1IP  |
| 10322 | HACD4.4    | 6.34E-15 | 0.847243 | 0.393 | 0.232 | 1.19E-10 | Platelet | HACD4    |
| 10323 | FKBP1A.4   | 1.20E-14 | 0.862454 | 0.736 | 0.582 | 2.25E-10 | Platelet | FKBP1A   |
| 10324 | GCLM       | 1.39E-14 | 0.571098 | 0.166 | 0.062 | 2.61E-10 | Platelet | GCLM     |
| 10325 | RHOA.4     | 1.39E-14 | 0.511217 | 0.963 | 0.873 | 2.62E-10 | Platelet | RHOA     |
| 10326 | TALDO1.3   | 1.42E-14 | 0.833884 | 0.661 | 0.482 | 2.67E-10 | Platelet | TALDO1   |
| 10327 | G3BP2.1    | 1.64E-14 | 0.690796 | 0.441 | 0.265 | 3.09E-10 | Platelet | G3BP2    |
| 10328 | RTN3.4     | 1.91E-14 | 0.910032 | 0.329 | 0.18  | 3.59E-10 | Platelet | RTN3     |
| 10329 | BIN2.4     | 4.65E-14 | 0.939318 | 0.641 | 0.496 | 8.73E-10 | Platelet | BIN2     |
| 10330 | AKIRIN1.2  | 5.40E-14 | 0.557902 | 0.376 | 0.208 | 1.01E-09 | Platelet | AKIRIN1  |
| 10331 | RIT1       | 5.56E-14 | 0.608146 | 0.163 | 0.062 | 1.05E-09 | Platelet | RIT1     |
| 10332 | BCAP31.1   | 5.59E-14 | 0.497049 | 0.702 | 0.535 | 1.05E-09 | Platelet | BCAP31   |
| 10333 | C12orf76.1 | 5.71E-14 | 0.748897 | 0.261 | 0.126 | 1.07E-09 | Platelet | C12orf76 |
| 10334 | ARRB1.1    | 5.86E-14 | 0.606364 | 0.142 | 0.05  | 1.10E-09 | Platelet | ARRB1    |
| 10335 | S100A10.4  | 6.36E-14 | -1.08278 | 0.475 | 0.622 | 1.20E-09 | Platelet | S100A10  |
| 10336 | ARPC1B.3   | 6.94E-14 | 0.778307 | 0.651 | 0.476 | 1.30E-09 | Platelet | ARPC1B   |
| 10337 | SCFD2      | 8.92E-14 | 0.317794 | 0.139 | 0.047 | 1.68E-09 | Platelet | SCFD2    |
| 10338 | MT-ND5.2   | 1.01E-13 | -0.62047 | 0.576 | 0.716 | 1.89E-09 | Platelet | MT-ND5   |
| 10339 | MYH9.3     | 1.29E-13 | 0.784658 | 0.617 | 0.462 | 2.42E-09 | Platelet | MYH9     |
| 10340 | DNAJB6.3   | 1.34E-13 | 1.01954  | 0.441 | 0.284 | 2.51E-09 | Platelet | DNAJB6   |
| 10341 | PDLIM7.1   | 1.66E-13 | 0.486655 | 0.139 | 0.048 | 3.12E-09 | Platelet | PDLIM7   |
| 10342 | RPS8.5     | 1.79E-13 | -0.37576 | 0.861 | 0.992 | 3.36E-09 | Platelet | RPS8     |
| 10343 | KCTD20     | 1.79E-13 | 0.512961 | 0.197 | 0.082 | 3.37E-09 | Platelet | KCTD20   |
| 10344 | COX7C.4    | 2.16E-13 | -0.41448 | 0.746 | 0.894 | 4.05E-09 | Platelet | COX7C    |

|       |            |          |          |       |       |          |          |            |
|-------|------------|----------|----------|-------|-------|----------|----------|------------|
| 10345 | SUPT4H1.4  | 2.17E-13 | 0.720046 | 0.505 | 0.332 | 4.08E-09 | Platelet | SUPT4H1    |
| 10346 | IKBKG.1    | 2.39E-13 | 0.730213 | 0.247 | 0.121 | 4.48E-09 | Platelet | IKBKG      |
| 10347 | ADI1.1     | 2.94E-13 | 0.611285 | 0.373 | 0.213 | 5.53E-09 | Platelet | ADI1       |
| 10348 | PGD.5      | 3.01E-13 | 0.478794 | 0.386 | 0.219 | 5.66E-09 | Platelet | PGD        |
| 10349 | UBAC2.3    | 4.13E-13 | 0.629931 | 0.471 | 0.296 | 7.75E-09 | Platelet | UBAC2      |
| 10350 | EPOR       | 4.25E-13 | 0.360359 | 0.119 | 0.039 | 7.99E-09 | Platelet | EPOR       |
| 10351 | PYCR2.3    | 4.69E-13 | 0.597721 | 0.281 | 0.145 | 8.81E-09 | Platelet | PYCR2      |
| 10352 | S100A4.5   | 5.31E-13 | -1.87878 | 0.41  | 0.54  | 9.98E-09 | Platelet | S100A4     |
| 10353 | RPL41.3    | 5.33E-13 | -0.31239 | 0.956 | 0.999 | 1.00E-08 | Platelet | RPL41      |
| 10354 | CAPN1.2    | 6.09E-13 | 0.930616 | 0.353 | 0.207 | 1.14E-08 | Platelet | CAPN1      |
| 10355 | GSTO1.5    | 7.04E-13 | 1.618098 | 0.434 | 0.289 | 1.32E-08 | Platelet | GSTO1      |
| 10356 | INSIG1.2   | 7.31E-13 | 1.224389 | 0.244 | 0.119 | 1.37E-08 | Platelet | INSIG1     |
| 10357 | LPAR5.1    | 7.38E-13 | 0.385533 | 0.142 | 0.051 | 1.39E-08 | Platelet | LPAR5      |
| 10358 | MTFR1L     | 8.00E-13 | 0.513363 | 0.193 | 0.083 | 1.50E-08 | Platelet | MTFR1L     |
| 10359 | DSE        | 8.56E-13 | 0.309147 | 0.102 | 0.03  | 1.61E-08 | Platelet | DSE        |
| 10360 | RPL36.5    | 9.12E-13 | -0.38787 | 0.871 | 0.99  | 1.71E-08 | Platelet | RPL36      |
| 10361 | S100A6.5   | 9.37E-13 | -1.42447 | 0.661 | 0.752 | 1.76E-08 | Platelet | S100A6     |
| 10362 | MIGA2      | 1.06E-12 | 0.342206 | 0.136 | 0.047 | 1.99E-08 | Platelet | MIGA2      |
| 10363 | LYPLAL1    | 1.19E-12 | 0.718275 | 0.227 | 0.108 | 2.23E-08 | Platelet | LYPLAL1    |
| 10364 | CD36.1     | 1.30E-12 | 0.579369 | 0.149 | 0.055 | 2.44E-08 | Platelet | CD36       |
| 10365 | ICAM2.3    | 1.34E-12 | 1.166728 | 0.536 | 0.387 | 2.53E-08 | Platelet | ICAM2      |
| 10366 | SSFA2.1    | 1.39E-12 | 0.536885 | 0.125 | 0.044 | 2.62E-08 | Platelet | SSFA2      |
| 10367 | CAPZB.4    | 1.68E-12 | 0.611722 | 0.847 | 0.736 | 3.16E-08 | Platelet | CAPZB      |
| 10368 | LXN        | 1.77E-12 | 0.452238 | 0.105 | 0.033 | 3.32E-08 | Platelet | LXN        |
| 10369 | TANGO2     | 2.10E-12 | 0.435191 | 0.169 | 0.069 | 3.95E-08 | Platelet | TANGO2     |
| 10370 | UBA52.1    | 2.23E-12 | -0.35198 | 0.888 | 0.955 | 4.18E-08 | Platelet | UBA52      |
| 10371 | UQCRH.3    | 2.34E-12 | 0.558445 | 0.895 | 0.771 | 4.39E-08 | Platelet | UQCRH      |
| 10372 | AHNAK.4    | 3.08E-12 | -0.80569 | 0.085 | 0.259 | 5.78E-08 | Platelet | AHNAK      |
| 10373 | NDUFAF3.1  | 3.37E-12 | 0.764232 | 0.553 | 0.406 | 6.33E-08 | Platelet | NDUFAF3    |
| 10374 | ARHGDIB.3  | 3.38E-12 | 0.393796 | 0.993 | 0.961 | 6.34E-08 | Platelet | ARHGDIB    |
| 10375 | SAT1.3     | 3.76E-12 | 0.590757 | 0.6   | 0.436 | 7.06E-08 | Platelet | SAT1       |
| 10376 | MT-CO3.2   | 4.47E-12 | -0.37598 | 0.936 | 0.952 | 8.39E-08 | Platelet | MT-CO3     |
| 10377 | SRGN.5     | 4.48E-12 | 1.110825 | 0.58  | 0.404 | 8.42E-08 | Platelet | SRGN       |
| 10378 | SPNS1      | 4.60E-12 | 0.743183 | 0.231 | 0.115 | 8.63E-08 | Platelet | SPNS1      |
| 10379 | SEC14L1.2  | 4.63E-12 | 1.289048 | 0.281 | 0.156 | 8.70E-08 | Platelet | SEC14L1    |
| 10380 | NUTM2A-AS1 | 5.16E-12 | 0.775168 | 0.288 | 0.157 | 9.69E-08 | Platelet | NUTM2A-AS1 |
| 10381 | PSME1.2    | 5.69E-12 | -0.41604 | 0.749 | 0.861 | 1.07E-07 | Platelet | PSME1      |
| 10382 | RASGRP2.5  | 5.79E-12 | 0.974628 | 0.671 | 0.524 | 1.09E-07 | Platelet | RASGRP2    |
| 10383 | C9orf16.4  | 5.84E-12 | 0.643118 | 0.725 | 0.595 | 1.10E-07 | Platelet | C9orf16    |
| 10384 | MKRN1.2    | 6.00E-12 | 0.790339 | 0.359 | 0.22  | 1.13E-07 | Platelet | MKRN1      |
| 10385 | GNAS.1     | 6.00E-12 | 0.64363  | 0.502 | 0.344 | 1.13E-07 | Platelet | GNAS       |
| 10386 | JUNB.4     | 6.25E-12 | -0.8338  | 0.417 | 0.573 | 1.17E-07 | Platelet | JUNB       |
| 10387 | ABHD16A    | 6.29E-12 | 0.56137  | 0.231 | 0.111 | 1.18E-07 | Platelet | ABHD16A    |
| 10388 | TMA7.3     | 6.33E-12 | -0.3954  | 0.844 | 0.927 | 1.19E-07 | Platelet | TMA7       |
| 10389 | PNP        | 1.18E-11 | 0.529769 | 0.302 | 0.165 | 2.21E-07 | Platelet | PNP        |
| 10390 | CAPN2.5    | 1.35E-11 | 0.711128 | 0.339 | 0.2   | 2.54E-07 | Platelet | CAPN2      |
| 10391 | RPL26.4    | 1.37E-11 | -0.36683 | 0.871 | 0.99  | 2.58E-07 | Platelet | RPL26      |

|       |           |          |          |       |       |          |          |         |
|-------|-----------|----------|----------|-------|-------|----------|----------|---------|
| 10392 | WIPI1.1   | 1.53E-11 | 0.486181 | 0.108 | 0.037 | 2.88E-07 | Platelet | WIPI1   |
| 10393 | CD52.6    | 1.54E-11 | -0.49535 | 0.675 | 0.827 | 2.90E-07 | Platelet | CD52    |
| 10394 | EMC3.1    | 1.64E-11 | 0.662987 | 0.322 | 0.19  | 3.08E-07 | Platelet | EMC3    |
| 10395 | PPDPF.2   | 1.67E-11 | 0.573346 | 0.878 | 0.805 | 3.13E-07 | Platelet | PPDPF   |
| 10396 | RPL38.4   | 1.92E-11 | -0.45557 | 0.637 | 0.816 | 3.61E-07 | Platelet | RPL38   |
| 10397 | MAP4K2.1  | 2.15E-11 | 0.565844 | 0.292 | 0.159 | 4.04E-07 | Platelet | MAP4K2  |
| 10398 | SQSTM1.3  | 2.44E-11 | 0.697666 | 0.576 | 0.44  | 4.59E-07 | Platelet | SQSTM1  |
| 10399 | ANXA1.6   | 2.45E-11 | -0.97221 | 0.18  | 0.351 | 4.61E-07 | Platelet | ANXA1   |
| 10400 | NDUFA6.4  | 2.57E-11 | 0.973862 | 0.529 | 0.394 | 4.83E-07 | Platelet | NDUFA6  |
| 10401 | IL6ST.4   | 3.03E-11 | 0.562611 | 0.315 | 0.177 | 5.70E-07 | Platelet | IL6ST   |
| 10402 | CRYL1.1   | 3.72E-11 | 0.461518 | 0.186 | 0.084 | 6.99E-07 | Platelet | CRYL1   |
| 10403 | MSN.3     | 3.96E-11 | 0.479039 | 0.644 | 0.48  | 7.43E-07 | Platelet | MSN     |
| 10404 | RPS11.4   | 4.44E-11 | -0.40111 | 0.705 | 0.815 | 8.35E-07 | Platelet | RPS11   |
| 10405 | ABI1.2    | 4.66E-11 | 0.661194 | 0.386 | 0.24  | 8.75E-07 | Platelet | ABI1    |
| 10406 | RAB8A.2   | 4.77E-11 | 0.646683 | 0.403 | 0.266 | 8.96E-07 | Platelet | RAB8A   |
| 10407 | ARL8B     | 4.85E-11 | 0.757288 | 0.254 | 0.136 | 9.12E-07 | Platelet | ARL8B   |
| 10408 | RIPOR2.3  | 4.86E-11 | 1.112047 | 0.715 | 0.595 | 9.12E-07 | Platelet | RIPOR2  |
| 10409 | LGALS1.4  | 4.89E-11 | -1.5768  | 0.078 | 0.231 | 9.19E-07 | Platelet | LGALS1  |
| 10410 | RPL23A.3  | 6.45E-11 | -0.34171 | 0.824 | 0.964 | 1.21E-06 | Platelet | RPL23A  |
| 10411 | RPL28.3   | 7.08E-11 | -0.29681 | 0.881 | 0.998 | 1.33E-06 | Platelet | RPL28   |
| 10412 | COX6C.2   | 9.39E-11 | -0.41652 | 0.631 | 0.77  | 1.76E-06 | Platelet | COX6C   |
| 10413 | SEPT11.1  | 9.49E-11 | 0.466874 | 0.156 | 0.066 | 1.78E-06 | Platelet | Sep-11  |
| 10414 | CENPT.1   | 1.11E-10 | 0.511232 | 0.285 | 0.158 | 2.08E-06 | Platelet | CENPT   |
| 10415 | RPS16.3   | 1.15E-10 | -0.3716  | 0.803 | 0.926 | 2.15E-06 | Platelet | RPS16   |
| 10416 | MT2A.3    | 1.30E-10 | -0.91058 | 0.193 | 0.359 | 2.45E-06 | Platelet | MT2A    |
| 10417 | RPL13A.2  | 1.42E-10 | -0.49342 | 0.597 | 0.719 | 2.66E-06 | Platelet | RPL13A  |
| 10418 | MAST4     | 1.82E-10 | 0.3081   | 0.105 | 0.036 | 3.42E-06 | Platelet | MAST4   |
| 10419 | NPEPPS.1  | 1.85E-10 | 0.493602 | 0.312 | 0.18  | 3.47E-06 | Platelet | NPEPPS  |
| 10420 | LITAF.4   | 1.87E-10 | -0.61852 | 0.39  | 0.546 | 3.52E-06 | Platelet | LITAF   |
| 10421 | RAB1B.1   | 2.18E-10 | 0.713717 | 0.407 | 0.273 | 4.09E-06 | Platelet | RAB1B   |
| 10422 | GTF3C6.1  | 2.31E-10 | 0.489952 | 0.417 | 0.268 | 4.35E-06 | Platelet | GTF3C6  |
| 10423 | MAGED2.3  | 2.45E-10 | 0.588481 | 0.353 | 0.22  | 4.60E-06 | Platelet | MAGED2  |
| 10424 | STIM1     | 2.60E-10 | 0.515376 | 0.244 | 0.129 | 4.89E-06 | Platelet | STIM1   |
| 10425 | ARPC5.4   | 3.03E-10 | 0.51616  | 0.756 | 0.623 | 5.69E-06 | Platelet | ARPC5   |
| 10426 | PPM1A     | 3.13E-10 | 0.544833 | 0.176 | 0.08  | 5.88E-06 | Platelet | PPM1A   |
| 10427 | GNAQ.1    | 3.21E-10 | 0.314019 | 0.115 | 0.042 | 6.02E-06 | Platelet | GNAQ    |
| 10428 | TGFB1.5   | 3.67E-10 | 0.729144 | 0.417 | 0.286 | 6.90E-06 | Platelet | TGFB1   |
| 10429 | BNIP3L.2  | 3.74E-10 | 0.703567 | 0.451 | 0.31  | 7.03E-06 | Platelet | BNIP3L  |
| 10430 | TTC33     | 4.90E-10 | 0.339584 | 0.115 | 0.043 | 9.20E-06 | Platelet | TTC33   |
| 10431 | NCK2      | 5.16E-10 | 0.393747 | 0.136 | 0.055 | 9.70E-06 | Platelet | NCK2    |
| 10432 | TACC3.3   | 5.51E-10 | 0.497597 | 0.329 | 0.196 | 1.03E-05 | Platelet | TACC3   |
| 10433 | CDIP1     | 5.89E-10 | 0.367275 | 0.203 | 0.099 | 1.11E-05 | Platelet | CDIP1   |
| 10434 | IPO11.1   | 6.46E-10 | 0.304925 | 0.102 | 0.035 | 1.21E-05 | Platelet | IPO11   |
| 10435 | ANXA2.5   | 7.42E-10 | -0.8666  | 0.149 | 0.305 | 1.39E-05 | Platelet | ANXA2   |
| 10436 | ATP5MC2.1 | 1.01E-09 | -0.33253 | 0.854 | 0.945 | 1.90E-05 | Platelet | ATP5MC2 |
| 10437 | CMTM6.2   | 1.08E-09 | 1.07711  | 0.444 | 0.325 | 2.03E-05 | Platelet | CMTM6   |
| 10438 | CALM1.6   | 1.18E-09 | 0.310725 | 0.956 | 0.879 | 2.22E-05 | Platelet | CALM1   |

|       |           |          |          |       |       |          |          |             |
|-------|-----------|----------|----------|-------|-------|----------|----------|-------------|
| 10439 | HIGD2A.4  | 1.20E-09 | -0.42246 | 0.529 | 0.67  | 2.26E-05 | Platelet | HIGD2A      |
| 10440 | CCNG1.3   | 1.31E-09 | 0.639987 | 0.342 | 0.213 | 2.46E-05 | Platelet | CCNG1       |
| 10441 | RYBP      | 1.35E-09 | 0.527095 | 0.119 | 0.046 | 2.54E-05 | Platelet | RYBP        |
| 10442 | RPL36AL.3 | 1.45E-09 | -0.32629 | 0.803 | 0.901 | 2.72E-05 | Platelet | RPL36AL     |
| 10443 | DOK2.6    | 1.52E-09 | 0.528141 | 0.356 | 0.221 | 2.86E-05 | Platelet | DOK2        |
| 10444 | TBPL1     | 1.56E-09 | 1.208467 | 0.275 | 0.162 | 2.93E-05 | Platelet | TBPL1       |
| 10445 | UXS1.1    | 1.89E-09 | 0.400794 | 0.247 | 0.133 | 3.56E-05 | Platelet | UXS1        |
| 10446 | CORO1A.3  | 1.91E-09 | -0.33189 | 0.786 | 0.923 | 3.59E-05 | Platelet | CORO1A      |
| 10447 | TSPOAP1-4 | 2.02E-09 | 0.342743 | 0.122 | 0.049 | 3.80E-05 | Platelet | TSPOAP1-AS1 |
| 10448 | EIF4G2.1  | 2.03E-09 | 0.476462 | 0.62  | 0.48  | 3.82E-05 | Platelet | EIF4G2      |
| 10449 | ZYX.4     | 2.19E-09 | 1.096398 | 0.522 | 0.394 | 4.12E-05 | Platelet | ZYX         |
| 10450 | ZFP36L2.5 | 2.29E-09 | -0.54941 | 0.481 | 0.63  | 4.31E-05 | Platelet | ZFP36L2     |
| 10451 | NDUFB2.3  | 2.36E-09 | -0.46666 | 0.508 | 0.641 | 4.43E-05 | Platelet | NDUFB2      |
| 10452 | ITFG1     | 2.37E-09 | 0.506261 | 0.264 | 0.15  | 4.45E-05 | Platelet | ITFG1       |
| 10453 | TPM3.4    | 2.58E-09 | 0.61182  | 0.824 | 0.728 | 4.84E-05 | Platelet | TPM3        |
| 10454 | CTSS.3    | 2.66E-09 | -0.94434 | 0.207 | 0.361 | 5.00E-05 | Platelet | CTSS        |
| 10455 | PTPN12.1  | 2.68E-09 | 0.342435 | 0.119 | 0.047 | 5.03E-05 | Platelet | PTPN12      |
| 10456 | YIF1B.4   | 2.95E-09 | 0.692568 | 0.308 | 0.192 | 5.54E-05 | Platelet | YIF1B       |
| 10457 | LSP1.4    | 2.95E-09 | -0.39538 | 0.715 | 0.818 | 5.54E-05 | Platelet | LSP1        |
| 10458 | SVIP.1    | 3.03E-09 | 0.413931 | 0.21  | 0.106 | 5.69E-05 | Platelet | SVIP        |
| 10459 | RPL23.3   | 3.29E-09 | -0.44134 | 0.522 | 0.655 | 6.17E-05 | Platelet | RPL23       |
| 10460 | FGR.4     | 3.39E-09 | -0.72268 | 0.085 | 0.226 | 6.36E-05 | Platelet | FGR         |
| 10461 | THEMIS2.3 | 3.44E-09 | -0.45664 | 0.037 | 0.166 | 6.47E-05 | Platelet | THEMIS2     |
| 10462 | GSTP1.5   | 3.48E-09 | -0.70843 | 0.393 | 0.531 | 6.54E-05 | Platelet | GSTP1       |
| 10463 | EPS15L1   | 3.72E-09 | 0.443559 | 0.203 | 0.103 | 6.99E-05 | Platelet | EPS15L1     |
| 10464 | RPL35A.5  | 5.41E-09 | -0.2797  | 0.942 | 0.989 | 0.000102 | Platelet | RPL35A      |
| 10465 | INF2      | 5.51E-09 | 0.345018 | 0.136 | 0.058 | 0.000104 | Platelet | INF2        |
| 10466 | CEP44     | 5.55E-09 | 0.308329 | 0.102 | 0.037 | 0.000104 | Platelet | CEP44       |
| 10467 | RPS15A.4  | 5.58E-09 | -0.29396 | 0.929 | 0.997 | 0.000105 | Platelet | RPS15A      |
| 10468 | TRAPPC1.2 | 5.69E-09 | 0.471865 | 0.719 | 0.609 | 0.000107 | Platelet | TRAPPC1     |
| 10469 | RPS25.4   | 5.76E-09 | -0.29228 | 0.875 | 0.992 | 0.000108 | Platelet | RPS25       |
| 10470 | SNRPN.3   | 5.78E-09 | 0.419107 | 0.492 | 0.344 | 0.000109 | Platelet | SNRPN       |
| 10471 | FLNA.6    | 6.35E-09 | 0.857651 | 0.485 | 0.351 | 0.000119 | Platelet | FLNA        |
| 10472 | SUSD3.6   | 6.49E-09 | 0.387153 | 0.366 | 0.23  | 0.000122 | Platelet | SUSD3       |
| 10473 | ARF4.1    | 6.56E-09 | 1.015689 | 0.4   | 0.277 | 0.000123 | Platelet | ARF4        |
| 10474 | NUTF2.2   | 6.73E-09 | 0.580234 | 0.488 | 0.364 | 0.000126 | Platelet | NUTF2       |
| 10475 | UQCRCQ.4  | 6.76E-09 | -0.44996 | 0.322 | 0.481 | 0.000127 | Platelet | UQCRCQ      |
| 10476 | YWHAE.4   | 6.76E-09 | 0.587139 | 0.386 | 0.262 | 0.000127 | Platelet | YWHAE       |
| 10477 | UBA7      | 6.84E-09 | 0.365396 | 0.251 | 0.139 | 0.000128 | Platelet | UBA7        |
| 10478 | TOMM7.4   | 7.74E-09 | -0.38423 | 0.692 | 0.822 | 0.000145 | Platelet | TOMM7       |
| 10479 | RAC1.3    | 8.14E-09 | 0.59746  | 0.637 | 0.496 | 0.000153 | Platelet | RAC1        |
| 10480 | ANXA7     | 8.55E-09 | 0.446861 | 0.437 | 0.299 | 0.000161 | Platelet | ANXA7       |
| 10481 | GLUL.4    | 1.01E-08 | 0.826879 | 0.285 | 0.17  | 0.00019  | Platelet | GLUL        |
| 10482 | RBM3.1    | 1.05E-08 | -0.45968 | 0.468 | 0.583 | 0.000198 | Platelet | RBM3        |
| 10483 | GNB5.1    | 1.08E-08 | 0.345455 | 0.18  | 0.087 | 0.000203 | Platelet | GNB5        |
| 10484 | TMEM219   | 1.12E-08 | 0.565214 | 0.525 | 0.396 | 0.000211 | Platelet | TMEM219     |
| 10485 | SMAP2.4   | 1.13E-08 | -0.44936 | 0.105 | 0.245 | 0.000213 | Platelet | SMAP2       |



|       |           |          |          |       |       |          |          |           |
|-------|-----------|----------|----------|-------|-------|----------|----------|-----------|
| 10486 | HTATIP2.2 | 1.13E-08 | 0.598707 | 0.312 | 0.195 | 0.000213 | Platelet | HTATIP2   |
| 10487 | PCNP.1    | 1.24E-08 | 0.398246 | 0.437 | 0.302 | 0.000232 | Platelet | PCNP      |
| 10488 | PDCD10.1  | 1.30E-08 | 0.951932 | 0.414 | 0.295 | 0.000244 | Platelet | PDCD10    |
| 10489 | RAB10.3   | 1.33E-08 | 0.811712 | 0.359 | 0.235 | 0.00025  | Platelet | RAB10     |
| 10490 | MTRF1L    | 1.34E-08 | 0.344202 | 0.132 | 0.057 | 0.000253 | Platelet | MTRF1L    |
| 10491 | PYCARD.4  | 1.35E-08 | -0.77645 | 0.231 | 0.367 | 0.000254 | Platelet | PYCARD    |
| 10492 | NKG7.5    | 1.35E-08 | -2.09126 | 0.075 | 0.204 | 0.000254 | Platelet | NKG7      |
| 10493 | GABARAPL  | 1.37E-08 | 0.502374 | 0.644 | 0.534 | 0.000256 | Platelet | GABARAPL2 |
| 10494 | ATF4.1    | 1.54E-08 | 0.484407 | 0.251 | 0.144 | 0.00029  | Platelet | ATF4      |
| 10495 | UBC.4     | 1.57E-08 | -0.38576 | 0.78  | 0.852 | 0.000295 | Platelet | UBC       |
| 10496 | EIF4E.1   | 1.62E-08 | 0.62602  | 0.346 | 0.231 | 0.000304 | Platelet | EIF4E     |
| 10497 | N4BP2L1.1 | 1.64E-08 | 0.515475 | 0.275 | 0.163 | 0.000308 | Platelet | N4BP2L1   |
| 10498 | CDK5RAP2  | 1.70E-08 | 0.336648 | 0.136 | 0.059 | 0.00032  | Platelet | CDK5RAP2  |
| 10499 | PSME2.4   | 2.35E-08 | -0.46742 | 0.512 | 0.651 | 0.000442 | Platelet | PSME2     |
| 10500 | PRKAR1A.5 | 2.40E-08 | 0.374315 | 0.454 | 0.316 | 0.00045  | Platelet | PRKAR1A   |
| 10501 | CRIP1.3   | 2.45E-08 | -0.67809 | 0.244 | 0.384 | 0.000461 | Platelet | CRIP1     |
| 10502 | RPS24.5   | 2.51E-08 | -0.30514 | 0.864 | 0.995 | 0.000471 | Platelet | RPS24     |
| 10503 | NDUFB1.2  | 2.82E-08 | -0.55083 | 0.271 | 0.417 | 0.00053  | Platelet | NDUFB1    |
| 10504 | ATP5MD.4  | 3.03E-08 | -0.46567 | 0.498 | 0.613 | 0.000569 | Platelet | ATP5MD    |
| 10505 | ENO2      | 3.08E-08 | 0.339684 | 0.108 | 0.043 | 0.000578 | Platelet | ENO2      |
| 10506 | DUSP1.3   | 3.43E-08 | -0.96773 | 0.102 | 0.233 | 0.000644 | Platelet | DUSP1     |
| 10507 | RPL22.4   | 3.67E-08 | -0.2987  | 0.847 | 0.978 | 0.000689 | Platelet | RPL22     |
| 10508 | CDKN2D.3  | 4.33E-08 | 0.5764   | 0.308 | 0.196 | 0.000813 | Platelet | CDKN2D    |
| 10509 | SEC61G.5  | 4.36E-08 | -0.492   | 0.373 | 0.515 | 0.000819 | Platelet | SEC61G    |
| 10510 | DBI.3     | 4.39E-08 | -0.40576 | 0.471 | 0.6   | 0.000825 | Platelet | DBI       |
| 10511 | RPL31.4   | 4.50E-08 | -0.30911 | 0.742 | 0.878 | 0.000846 | Platelet | RPL31     |
| 10512 | UQCRB.3   | 5.06E-08 | -0.35052 | 0.644 | 0.767 | 0.000951 | Platelet | UQCRB     |
| 10513 | PLEKHO1.2 | 5.30E-08 | 0.484942 | 0.193 | 0.102 | 0.000995 | Platelet | PLEKHO1   |
| 10514 | KLF2.2    | 5.47E-08 | -0.66226 | 0.369 | 0.5   | 0.001027 | Platelet | KLF2      |
| 10515 | SPI1.3    | 6.07E-08 | -0.69431 | 0.054 | 0.171 | 0.00114  | Platelet | SPI1      |
| 10516 | CSTB.3    | 7.10E-08 | -0.566   | 0.342 | 0.466 | 0.001334 | Platelet | CSTB      |
| 10517 | UBE2E3.1  | 7.27E-08 | 0.41396  | 0.302 | 0.189 | 0.001365 | Platelet | UBE2E3    |
| 10518 | CMAS      | 7.47E-08 | 0.530162 | 0.203 | 0.114 | 0.001404 | Platelet | CMAS      |
| 10519 | TMSB4X.5  | 7.51E-08 | 0.472874 | 1     | 0.998 | 0.00141  | Platelet | TMSB4X    |
| 10520 | CAP1.6    | 8.07E-08 | 0.519798 | 0.678 | 0.581 | 0.001516 | Platelet | CAP1      |
| 10521 | FCGR3A.6  | 8.17E-08 | -1.19633 | 0.02  | 0.122 | 0.001535 | Platelet | FCGR3A    |
| 10522 | ATP5ME.1  | 8.97E-08 | -0.48449 | 0.4   | 0.547 | 0.001684 | Platelet | ATP5ME    |
| 10523 | PPIB.4    | 9.37E-08 | -0.44218 | 0.668 | 0.791 | 0.00176  | Platelet | PPIB      |
| 10524 | COX7A2.3  | 9.54E-08 | -0.3483  | 0.6   | 0.698 | 0.001792 | Platelet | COX7A2    |
| 10525 | TYMP.5    | 1.01E-07 | -1.00216 | 0.092 | 0.213 | 0.001899 | Platelet | TYMP      |
| 10526 | PTPRJ.1   | 1.02E-07 | 0.353098 | 0.115 | 0.05  | 0.001914 | Platelet | PTPRJ     |
| 10527 | CD48.4    | 1.03E-07 | -0.49322 | 0.288 | 0.416 | 0.001938 | Platelet | CD48      |
| 10528 | RARRES3.5 | 1.12E-07 | -0.56583 | 0.431 | 0.556 | 0.002096 | Platelet | RARRES3   |
| 10529 | ELOB.2    | 1.15E-07 | -0.39303 | 0.681 | 0.751 | 0.002167 | Platelet | ELOB      |
| 10530 | CAMTA1.2  | 1.28E-07 | 0.583391 | 0.285 | 0.186 | 0.002405 | Platelet | CAMTA1    |
| 10531 | CREG1.3   | 1.33E-07 | 0.591709 | 0.153 | 0.076 | 0.002492 | Platelet | CREG1     |
| 10532 | IFI16.4   | 1.33E-07 | -0.46961 | 0.166 | 0.308 | 0.002502 | Platelet | IFI16     |

|       |           |          |          |       |       |          |          |           |
|-------|-----------|----------|----------|-------|-------|----------|----------|-----------|
| 10533 | ATP5MC3.  | 1.34E-07 | -0.34044 | 0.593 | 0.679 | 0.002508 | Platelet | ATP5MC3   |
| 10534 | ATP5MF.4  | 1.35E-07 | -0.38077 | 0.519 | 0.636 | 0.002532 | Platelet | ATP5MF    |
| 10535 | IER2.5    | 1.39E-07 | -0.54044 | 0.346 | 0.498 | 0.002604 | Platelet | IER2      |
| 10536 | STX11.1   | 1.39E-07 | 0.560465 | 0.149 | 0.073 | 0.002611 | Platelet | STX11     |
| 10537 | ASB8.1    | 1.46E-07 | 0.483501 | 0.258 | 0.159 | 0.002741 | Platelet | ASB8      |
| 10538 | MBNL1.3   | 1.49E-07 | 0.568486 | 0.583 | 0.476 | 0.002799 | Platelet | MBNL1     |
| 10539 | AP2S1.3   | 1.49E-07 | 0.49649  | 0.563 | 0.438 | 0.002802 | Platelet | AP2S1     |
| 10540 | CPNE5.3   | 1.52E-07 | 0.32342  | 0.125 | 0.056 | 0.002854 | Platelet | CPNE5     |
| 10541 | HSPB1.6   | 1.53E-07 | 0.377318 | 0.593 | 0.466 | 0.002879 | Platelet | HSPB1     |
| 10542 | RHEB.1    | 1.54E-07 | 0.453113 | 0.332 | 0.224 | 0.002888 | Platelet | RHEB      |
| 10543 | RABGAP1L  | 1.61E-07 | 0.423062 | 0.275 | 0.167 | 0.003029 | Platelet | RABGAP1L  |
| 10544 | ACAA1.3   | 1.81E-07 | -0.36554 | 0.146 | 0.286 | 0.003408 | Platelet | ACAA1     |
| 10545 | FASTKD5   | 1.84E-07 | 0.285144 | 0.125 | 0.056 | 0.003461 | Platelet | FASTKD5   |
| 10546 | ATP6V0E1. | 1.91E-07 | 0.338791 | 0.797 | 0.69  | 0.003595 | Platelet | ATP6V0E1  |
| 10547 | HCLS1.4   | 1.96E-07 | -0.37702 | 0.556 | 0.666 | 0.003689 | Platelet | HCLS1     |
| 10548 | ITGB2.6   | 2.04E-07 | -0.58911 | 0.542 | 0.647 | 0.003831 | Platelet | ITGB2     |
| 10549 | AP2M1     | 2.16E-07 | 0.392254 | 0.553 | 0.437 | 0.004062 | Platelet | AP2M1     |
| 10550 | TM2D2     | 2.42E-07 | 0.351769 | 0.19  | 0.102 | 0.004544 | Platelet | TM2D2     |
| 10551 | LY6E.3    | 2.49E-07 | -0.49278 | 0.532 | 0.635 | 0.004682 | Platelet | LY6E      |
| 10552 | ALDOA.4   | 2.50E-07 | 0.381189 | 0.756 | 0.641 | 0.004693 | Platelet | ALDOA     |
| 10553 | UBE2F.2   | 2.51E-07 | 0.458509 | 0.244 | 0.146 | 0.00471  | Platelet | UBE2F     |
| 10554 | SNX9.2    | 2.57E-07 | 0.341621 | 0.2   | 0.109 | 0.004823 | Platelet | SNX9      |
| 10555 | RBX1.2    | 2.57E-07 | 0.658854 | 0.614 | 0.516 | 0.004826 | Platelet | RBX1      |
| 10556 | LRBA.2    | 2.61E-07 | 0.332199 | 0.214 | 0.119 | 0.00491  | Platelet | LRBA      |
| 10557 | EFHD2.5   | 2.73E-07 | -0.4357  | 0.044 | 0.151 | 0.005127 | Platelet | EFHD2     |
| 10558 | RGS3.1    | 2.78E-07 | 0.413833 | 0.136 | 0.064 | 0.005217 | Platelet | RGS3      |
| 10559 | TMEM258.  | 3.05E-07 | -0.39546 | 0.529 | 0.636 | 0.005727 | Platelet | TMEM258   |
| 10560 | ATP5MG.4  | 3.15E-07 | -0.28286 | 0.844 | 0.92  | 0.005922 | Platelet | ATP5MG    |
| 10561 | SMPD1.4   | 3.16E-07 | 0.407071 | 0.234 | 0.135 | 0.005937 | Platelet | SMPD1     |
| 10562 | TENT5C.2  | 3.34E-07 | 0.438257 | 0.122 | 0.055 | 0.00627  | Platelet | TENT5C    |
| 10563 | MYO1F.5   | 3.62E-07 | -0.46389 | 0.061 | 0.171 | 0.006798 | Platelet | MYO1F     |
| 10564 | ADD3.5    | 3.67E-07 | 0.423682 | 0.631 | 0.491 | 0.006901 | Platelet | ADD3      |
| 10565 | IRF1.4    | 3.70E-07 | -0.55188 | 0.271 | 0.404 | 0.006949 | Platelet | IRF1      |
| 10566 | PKIG.1    | 3.77E-07 | 0.292063 | 0.169 | 0.086 | 0.007083 | Platelet | PKIG      |
| 10567 | EPB41.4   | 3.85E-07 | 0.32121  | 0.424 | 0.289 | 0.007237 | Platelet | EPB41     |
| 10568 | ZCCHC17.1 | 4.05E-07 | 0.320622 | 0.203 | 0.113 | 0.007605 | Platelet | ZCCHC17   |
| 10569 | PAIP2.2   | 4.34E-07 | 0.407692 | 0.668 | 0.558 | 0.008147 | Platelet | PAIP2     |
| 10570 | ISCA1.1   | 4.40E-07 | 0.528728 | 0.234 | 0.142 | 0.00827  | Platelet | ISCA1     |
| 10571 | HMGB1.4   | 4.62E-07 | 0.364703 | 0.875 | 0.813 | 0.008677 | Platelet | HMGB1     |
| 10572 | NOP10.2   | 4.68E-07 | -0.44956 | 0.417 | 0.539 | 0.008784 | Platelet | NOP10     |
| 10573 | CCDC28B.1 | 4.86E-07 | 0.267147 | 0.136 | 0.064 | 0.009135 | Platelet | CCDC28B   |
| 10574 | PHKB      | 4.90E-07 | 0.364893 | 0.18  | 0.096 | 0.009204 | Platelet | PHKB      |
| 10575 | HMG20B.2  | 5.37E-07 | 0.359654 | 0.288 | 0.184 | 0.010093 | Platelet | HMG20B    |
| 10576 | CMPK1.3   | 5.56E-07 | 0.506007 | 0.42  | 0.318 | 0.010453 | Platelet | CMPK1     |
| 10577 | TNFRSF1B. | 5.80E-07 | -0.44117 | 0.051 | 0.156 | 0.010891 | Platelet | TNFRSF1B  |
| 10578 | MAPK1IP1  | 5.88E-07 | 0.283261 | 0.38  | 0.255 | 0.011046 | Platelet | MAPK1IP1L |
| 10579 | CCPG1.2   | 5.98E-07 | 0.522814 | 0.214 | 0.127 | 0.01123  | Platelet | CCPG1     |

|       |            |          |          |       |       |          |          |          |
|-------|------------|----------|----------|-------|-------|----------|----------|----------|
| 10580 | FGFBP2.6   | 5.98E-07 | -1.25916 | 0.014 | 0.101 | 0.011239 | Platelet | FGFBP2   |
| 10581 | TCIRG1.3   | 6.80E-07 | -0.43096 | 0.129 | 0.255 | 0.012779 | Platelet | TCIRG1   |
| 10582 | ARMC8      | 7.05E-07 | 0.361237 | 0.251 | 0.153 | 0.013252 | Platelet | ARMC8    |
| 10583 | TBC1D20    | 7.33E-07 | 0.309113 | 0.139 | 0.068 | 0.013777 | Platelet | TBC1D20  |
| 10584 | SERPINA1.1 | 7.76E-07 | -1.41392 | 0.024 | 0.114 | 0.014584 | Platelet | SERPINA1 |
| 10585 | COX5A.5    | 7.82E-07 | -0.38822 | 0.478 | 0.561 | 0.014698 | Platelet | COX5A    |
| 10586 | RASA3.5    | 8.44E-07 | 0.400157 | 0.312 | 0.202 | 0.015859 | Platelet | RASA3    |
| 10587 | SLC25A6.2  | 9.05E-07 | -0.28784 | 0.668 | 0.798 | 0.017001 | Platelet | SLC25A6  |
| 10588 | AMD1.2     | 9.24E-07 | 0.573334 | 0.251 | 0.157 | 0.017361 | Platelet | AMD1     |
| 10589 | ITM2A.4    | 9.72E-07 | 0.291742 | 0.495 | 0.352 | 0.01826  | Platelet | ITM2A    |
| 10590 | RAP2B      | 1.07E-06 | 0.52361  | 0.169 | 0.093 | 0.020168 | Platelet | RAP2B    |
| 10591 | ARL6IP5.3  | 1.12E-06 | 0.338542 | 0.746 | 0.644 | 0.02101  | Platelet | ARL6IP5  |
| 10592 | HNRNPK.3   | 1.14E-06 | 0.281402 | 0.824 | 0.744 | 0.02133  | Platelet | HNRNPK   |
| 10593 | CHCHD2.2   | 1.15E-06 | -0.28592 | 0.732 | 0.806 | 0.021668 | Platelet | CHCHD2   |
| 10594 | TYROBP.4   | 1.15E-06 | -2.09635 | 0.105 | 0.204 | 0.021691 | Platelet | TYROBP   |
| 10595 | CD300A.5   | 1.16E-06 | -0.4728  | 0.047 | 0.147 | 0.021721 | Platelet | CD300A   |
| 10596 | IL10RA.5   | 1.16E-06 | -0.36823 | 0.132 | 0.259 | 0.021801 | Platelet | IL10RA   |
| 10597 | SNRPG.2    | 1.17E-06 | -0.38884 | 0.397 | 0.521 | 0.02197  | Platelet | SNRPG    |
| 10598 | TRIM13.1   | 1.19E-06 | 0.451266 | 0.169 | 0.093 | 0.022404 | Platelet | TRIM13   |
| 10599 | COPS9.3    | 1.20E-06 | -0.38728 | 0.258 | 0.388 | 0.022471 | Platelet | COPS9    |
| 10600 | SON.2      | 1.20E-06 | -0.375   | 0.532 | 0.645 | 0.022602 | Platelet | SON      |
| 10601 | EIF3K.2    | 1.26E-06 | -0.25588 | 0.766 | 0.877 | 0.023696 | Platelet | EIF3K    |
| 10602 | RPL27A.2   | 1.31E-06 | -0.37321 | 0.553 | 0.66  | 0.024554 | Platelet | RPL27A   |
| 10603 | TVP23B.1   | 1.41E-06 | 0.370421 | 0.231 | 0.137 | 0.026443 | Platelet | TVP23B   |
| 10604 | ZFYVE21    | 1.51E-06 | 0.254527 | 0.112 | 0.051 | 0.028409 | Platelet | ZFYVE21  |
| 10605 | GZMH.5     | 1.60E-06 | -1.20642 | 0.017 | 0.101 | 0.030003 | Platelet | GZMH     |
| 10606 | TSC22D3.3  | 1.62E-06 | 0.365441 | 0.736 | 0.616 | 0.030451 | Platelet | TSC22D3  |
| 10607 | VAPA.3     | 1.75E-06 | 0.703985 | 0.542 | 0.462 | 0.032939 | Platelet | VAPA     |
| 10608 | CASP1.3    | 1.88E-06 | -0.48448 | 0.129 | 0.239 | 0.035238 | Platelet | CASP1    |
| 10609 | LAMTOR5.5  | 1.88E-06 | -0.36376 | 0.258 | 0.396 | 0.035241 | Platelet | LAMTOR5  |
| 10610 | SH3BGRL.5  | 1.88E-06 | 0.446296 | 0.658 | 0.553 | 0.03525  | Platelet | SH3BGRL  |
| 10611 | HLA-DRB1.1 | 1.88E-06 | -0.43505 | 0.271 | 0.434 | 0.035287 | Platelet | HLA-DRB1 |
| 10612 | ACTR10.2   | 1.93E-06 | 0.428557 | 0.302 | 0.198 | 0.036314 | Platelet | ACTR10   |
| 10613 | LGALS8     | 1.98E-06 | 0.363176 | 0.166 | 0.09  | 0.037162 | Platelet | LGALS8   |
| 10614 | MNDA.5     | 2.03E-06 | -0.84062 | 0.027 | 0.114 | 0.03812  | Platelet | MNDA     |
| 10615 | ATP2A3.4   | 2.20E-06 | 0.361656 | 0.288 | 0.187 | 0.041365 | Platelet | ATP2A3   |
| 10616 | CCL4.5     | 2.38E-06 | -0.8209  | 0.02  | 0.105 | 0.044786 | Platelet | CCL4     |
| 10617 | ROMO1.4    | 2.53E-06 | -0.44792 | 0.322 | 0.436 | 0.047521 | Platelet | ROMO1    |
| 10986 | GNLY.6     | 0        | 5.215902 | 0.857 | 0.046 | 0        | NK cells | GNLY     |
| 10987 | GZMB.6     | 0        | 4.25516  | 0.919 | 0.048 | 0        | NK cells | GZMB     |
| 10988 | NKG7.6     | 0        | 4.166074 | 0.979 | 0.147 | 0        | NK cells | NKG7     |
| 10989 | PRF1.7     | 0        | 3.862302 | 0.969 | 0.118 | 0        | NK cells | PRF1     |
| 10990 | SPON2.3    | 0        | 3.415517 | 0.788 | 0.047 | 0        | NK cells | SPON2    |
| 10991 | CST7.4     | 0        | 3.315749 | 0.964 | 0.112 | 0        | NK cells | CST7     |
| 10992 | CTSW.7     | 0        | 3.29956  | 0.949 | 0.203 | 0        | NK cells | CTSW     |
| 10993 | GZMA.6     | 0        | 3.275299 | 0.92  | 0.08  | 0        | NK cells | GZMA     |
| 10994 | CLIC3.6    | 0        | 3.243839 | 0.812 | 0.056 | 0        | NK cells | CLIC3    |

|       |            |   |          |       |       |   |          |          |
|-------|------------|---|----------|-------|-------|---|----------|----------|
| 10995 | FGFBP2.7   | 0 | 3.200308 | 0.769 | 0.051 | 0 | NK cells | FGFBP2   |
| 10996 | CCL4.6     | 0 | 3.19646  | 0.772 | 0.056 | 0 | NK cells | CCL4     |
| 10997 | HOPX.7     | 0 | 2.990841 | 0.826 | 0.059 | 0 | NK cells | HOPX     |
| 10998 | CCL5.7     | 0 | 2.893505 | 0.749 | 0.105 | 0 | NK cells | CCL5     |
| 10999 | GZMH.6     | 0 | 2.875748 | 0.794 | 0.05  | 0 | NK cells | GZMH     |
| 11000 | KLRD1.3    | 0 | 2.790038 | 0.845 | 0.044 | 0 | NK cells | KLRD1    |
| 11001 | KLRB1.6    | 0 | 2.487662 | 0.745 | 0.074 | 0 | NK cells | KLRB1    |
| 11002 | XCL2.1     | 0 | 2.372855 | 0.538 | 0.013 | 0 | NK cells | XCL2     |
| 11003 | MYOM2.1    | 0 | 2.356832 | 0.496 | 0.037 | 0 | NK cells | MYOM2    |
| 11004 | FCGR3A.7   | 0 | 2.35161  | 0.802 | 0.072 | 0 | NK cells | FCGR3A   |
| 11005 | KLRF1.1    | 0 | 2.305125 | 0.641 | 0.005 | 0 | NK cells | KLRF1    |
| 11006 | CD247.7    | 0 | 2.240636 | 0.903 | 0.347 | 0 | NK cells | CD247    |
| 11007 | TRDC.2     | 0 | 2.171813 | 0.619 | 0.037 | 0 | NK cells | TRDC     |
| 11008 | IL2RB.2    | 0 | 2.097992 | 0.629 | 0.049 | 0 | NK cells | IL2RB    |
| 11009 | LAIR2.1    | 0 | 2.067615 | 0.501 | 0.043 | 0 | NK cells | LAIR2    |
| 11010 | S1PR5.1    | 0 | 2.004545 | 0.598 | 0.032 | 0 | NK cells | S1PR5    |
| 11011 | TTC38.2    | 0 | 2.002315 | 0.599 | 0.041 | 0 | NK cells | TTC38    |
| 11012 | CX3CR1.3   | 0 | 1.990994 | 0.604 | 0.061 | 0 | NK cells | CX3CR1   |
| 11013 | APMAP.4    | 0 | 1.972309 | 0.762 | 0.179 | 0 | NK cells | APMAP    |
| 11014 | SH2D1B.1   | 0 | 1.969486 | 0.532 | 0.008 | 0 | NK cells | SH2D1B   |
| 11015 | HCST.6     | 0 | 1.90556  | 0.978 | 0.603 | 0 | NK cells | HCST     |
| 11016 | ADGRG1.1   | 0 | 1.904246 | 0.548 | 0.026 | 0 | NK cells | ADGRG1   |
| 11017 | PRSS23.1   | 0 | 1.892169 | 0.514 | 0.026 | 0 | NK cells | PRSS23   |
| 11018 | SH2D2A.5   | 0 | 1.818436 | 0.617 | 0.105 | 0 | NK cells | SH2D2A   |
| 11019 | KLRC1.1    | 0 | 1.801005 | 0.354 | 0.013 | 0 | NK cells | KLRC1    |
| 11020 | TYROBP.5   | 0 | 1.788145 | 0.931 | 0.15  | 0 | NK cells | TYROBP   |
| 11021 | IGFBP7.3   | 0 | 1.771382 | 0.449 | 0.028 | 0 | NK cells | IGFBP7   |
| 11022 | MATK.5     | 0 | 1.767001 | 0.589 | 0.082 | 0 | NK cells | MATK     |
| 11023 | CD300A.6   | 0 | 1.741347 | 0.613 | 0.112 | 0 | NK cells | CD300A   |
| 11024 | IFITM2.6   | 0 | 1.73159  | 0.992 | 0.814 | 0 | NK cells | IFITM2   |
| 11025 | CD7.6      | 0 | 1.727703 | 0.962 | 0.547 | 0 | NK cells | CD7      |
| 11026 | FCER1G.4   | 0 | 1.707136 | 0.853 | 0.176 | 0 | NK cells | FCER1G   |
| 11027 | GZMM.6     | 0 | 1.706482 | 0.846 | 0.377 | 0 | NK cells | GZMM     |
| 11028 | TRBC1.5    | 0 | 1.698701 | 0.724 | 0.273 | 0 | NK cells | TRBC1    |
| 11029 | CMC1.3     | 0 | 1.597588 | 0.485 | 0.128 | 0 | NK cells | CMC1     |
| 11030 | CTSC.6     | 0 | 1.595721 | 0.785 | 0.301 | 0 | NK cells | CTSC     |
| 11031 | CD99.5     | 0 | 1.593496 | 0.902 | 0.515 | 0 | NK cells | CD99     |
| 11032 | PLEK.5     | 0 | 1.586032 | 0.712 | 0.201 | 0 | NK cells | PLEK     |
| 11033 | XCL1.1     | 0 | 1.58463  | 0.377 | 0.01  | 0 | NK cells | XCL1     |
| 11034 | C12orf75.6 | 0 | 1.564387 | 0.648 | 0.169 | 0 | NK cells | C12orf75 |
| 11035 | FCRL6.1    | 0 | 1.556919 | 0.445 | 0.027 | 0 | NK cells | FCRL6    |
| 11036 | SRGN.6     | 0 | 1.548197 | 0.905 | 0.369 | 0 | NK cells | SRGN     |
| 11037 | PTGDR.1    | 0 | 1.526435 | 0.431 | 0.015 | 0 | NK cells | PTGDR    |
| 11038 | TPST2.4    | 0 | 1.509639 | 0.674 | 0.207 | 0 | NK cells | TPST2    |
| 11039 | ITGB2.7    | 0 | 1.502643 | 0.926 | 0.626 | 0 | NK cells | ITGB2    |
| 11040 | APOBEC3G   | 0 | 1.4888   | 0.623 | 0.191 | 0 | NK cells | APOBEC3G |
| 11041 | RARRES3.6  | 0 | 1.479274 | 0.89  | 0.531 | 0 | NK cells | RARRES3  |

|                 |   |          |       |       |            |          |
|-----------------|---|----------|-------|-------|------------|----------|
| 11042 EFHD2.6   | 0 | 1.457461 | 0.548 | 0.122 | 0 NK cells | EFHD2    |
| 11043 CHST12.6  | 0 | 1.432831 | 0.573 | 0.124 | 0 NK cells | CHST12   |
| 11044 ABI3.6    | 0 | 1.428999 | 0.577 | 0.145 | 0 NK cells | ABI3     |
| 11045 SLC9A3R1. | 0 | 1.423782 | 0.785 | 0.387 | 0 NK cells | SLC9A3R1 |
| 11046 CD160.1   | 0 | 1.417677 | 0.328 | 0.01  | 0 NK cells | CD160    |
| 11047 DDIT4.4   | 0 | 1.412235 | 0.49  | 0.152 | 0 NK cells | DDIT4    |
| 11048 LITAF.5   | 0 | 1.408683 | 0.842 | 0.523 | 0 NK cells | LITAF    |
| 11049 IFITM1.6  | 0 | 1.396649 | 0.995 | 0.789 | 0 NK cells | IFITM1   |
| 11050 XBP1.5    | 0 | 1.392892 | 0.74  | 0.339 | 0 NK cells | XBP1     |
| 11051 DHRS7.4   | 0 | 1.391478 | 0.715 | 0.305 | 0 NK cells | DHRS7    |
| 11052 PYHIN1.2  | 0 | 1.365355 | 0.458 | 0.06  | 0 NK cells | PYHIN1   |
| 11053 C1orf21.1 | 0 | 1.354608 | 0.415 | 0.025 | 0 NK cells | C1orf21  |
| 11054 CD63.5    | 0 | 1.336165 | 0.635 | 0.201 | 0 NK cells | CD63     |
| 11055 KLRC3     | 0 | 1.334557 | 0.308 | 0.017 | 0 NK cells | KLRC3    |
| 11056 SPN.5     | 0 | 1.3335   | 0.574 | 0.172 | 0 NK cells | SPN      |
| 11057 AOA.6     | 0 | 1.32415  | 0.463 | 0.104 | 0 NK cells | AOA      |
| 11058 RHOC.5    | 0 | 1.317273 | 0.462 | 0.082 | 0 NK cells | RHOC     |
| 11059 ZAP70.6   | 0 | 1.313392 | 0.755 | 0.347 | 0 NK cells | ZAP70    |
| 11060 CLIC1.5   | 0 | 1.311265 | 0.96  | 0.679 | 0 NK cells | CLIC1    |
| 11061 STOM.4    | 0 | 1.301047 | 0.495 | 0.084 | 0 NK cells | STOM     |
| 11062 GNG2.4    | 0 | 1.295997 | 0.606 | 0.24  | 0 NK cells | GNG2     |
| 11063 PLEKHF1.3 | 0 | 1.294625 | 0.439 | 0.066 | 0 NK cells | PLEKHF1  |
| 11064 TBX21.1   | 0 | 1.273215 | 0.373 | 0.024 | 0 NK cells | TBX21    |
| 11065 NCR3.4    | 0 | 1.268624 | 0.457 | 0.093 | 0 NK cells | NCR3     |
| 11066 ADAM8.4   | 0 | 1.268076 | 0.478 | 0.111 | 0 NK cells | ADAM8    |
| 11067 DUSP2.5   | 0 | 1.245313 | 0.386 | 0.119 | 0 NK cells | DUSP2    |
| 11068 STARD3NL  | 0 | 1.2234   | 0.446 | 0.131 | 0 NK cells | STARD3NL |
| 11069 CCL4L2.1  | 0 | 1.221832 | 0.226 | 0.022 | 0 NK cells | CCL4L2   |
| 11070 PFN1.6    | 0 | 1.202149 | 0.999 | 0.983 | 0 NK cells | PFN1     |
| 11071 MBP.4     | 0 | 1.183549 | 0.624 | 0.284 | 0 NK cells | MBP      |
| 11072 ANXA1.7   | 0 | 1.180636 | 0.746 | 0.321 | 0 NK cells | ANXA1    |
| 11073 PTGER2.3  | 0 | 1.173566 | 0.415 | 0.081 | 0 NK cells | PTGER2   |
| 11074 ARPC5L.3  | 0 | 1.171634 | 0.629 | 0.295 | 0 NK cells | ARPC5L   |
| 11075 SAMD3.5   | 0 | 1.164494 | 0.51  | 0.144 | 0 NK cells | SAMD3    |
| 11076 AKR1C3.2  | 0 | 1.148528 | 0.278 | 0.016 | 0 NK cells | AKR1C3   |
| 11077 LGALS1.5  | 0 | 1.145657 | 0.652 | 0.199 | 0 NK cells | LGALS1   |
| 11078 PDIA3.4   | 0 | 1.143061 | 0.758 | 0.491 | 0 NK cells | PDIA3    |
| 11079 CALM1.7   | 0 | 1.141439 | 0.968 | 0.873 | 0 NK cells | CALM1    |
| 11080 CDK2AP2.5 | 0 | 1.12874  | 0.605 | 0.301 | 0 NK cells | CDK2AP2  |
| 11081 FLNA.7    | 0 | 1.116431 | 0.659 | 0.33  | 0 NK cells | FLNA     |
| 11082 ARL4C.7   | 0 | 1.108151 | 0.583 | 0.244 | 0 NK cells | ARL4C    |
| 11083 RAP1B.5   | 0 | 1.101027 | 0.863 | 0.607 | 0 NK cells | RAP1B    |
| 11084 CCND3.6   | 0 | 1.09867  | 0.807 | 0.571 | 0 NK cells | CCND3    |
| 11085 FGR.5     | 0 | 1.09151  | 0.59  | 0.199 | 0 NK cells | FGR      |
| 11086 GNPTAB.3  | 0 | 1.087986 | 0.385 | 0.089 | 0 NK cells | GNPTAB   |
| 11087 IRF1.5    | 0 | 1.085613 | 0.694 | 0.382 | 0 NK cells | IRF1     |
| 11088 CISD3.4   | 0 | 1.081113 | 0.462 | 0.166 | 0 NK cells | CISD3    |

|       |           |   |          |       |       |   |          |         |
|-------|-----------|---|----------|-------|-------|---|----------|---------|
| 11089 | GSTP1.6   | 0 | 1.075449 | 0.837 | 0.508 | 0 | NK cells | GSTP1   |
| 11090 | GPR65.5   | 0 | 1.071326 | 0.464 | 0.166 | 0 | NK cells | GPR65   |
| 11091 | DOK2.7    | 0 | 1.065229 | 0.528 | 0.199 | 0 | NK cells | DOK2    |
| 11092 | TRGC1.1   | 0 | 1.062854 | 0.293 | 0.019 | 0 | NK cells | TRGC1   |
| 11093 | OSTF1.4   | 0 | 1.055705 | 0.74  | 0.437 | 0 | NK cells | OSTF1   |
| 11094 | STAT4.5   | 0 | 1.044088 | 0.396 | 0.1   | 0 | NK cells | STAT4   |
| 11095 | FAM49B.3  | 0 | 1.040098 | 0.698 | 0.41  | 0 | NK cells | FAM49B  |
| 11096 | JAK1.5    | 0 | 1.04007  | 0.816 | 0.628 | 0 | NK cells | JAK1    |
| 11097 | HLA-C.5   | 0 | 1.036368 | 1     | 0.982 | 0 | NK cells | HLA-C   |
| 11098 | LY6E.4    | 0 | 1.035262 | 0.833 | 0.62  | 0 | NK cells | LY6E    |
| 11099 | RASSF1.3  | 0 | 1.03183  | 0.475 | 0.166 | 0 | NK cells | RASSF1  |
| 11100 | CD244.1   | 0 | 1.025555 | 0.323 | 0.045 | 0 | NK cells | CD244   |
| 11101 | LCP1.5    | 0 | 1.024433 | 0.815 | 0.567 | 0 | NK cells | LCP1    |
| 11102 | SYTL3.1   | 0 | 1.016806 | 0.299 | 0.048 | 0 | NK cells | SYTL3   |
| 11103 | TSEN54.5  | 0 | 1.013507 | 0.456 | 0.146 | 0 | NK cells | TSEN54  |
| 11104 | CFL1.6    | 0 | 1.011358 | 0.993 | 0.95  | 0 | NK cells | CFL1    |
| 11105 | ARPC2.6   | 0 | 1.00834  | 0.949 | 0.853 | 0 | NK cells | ARPC2   |
| 11106 | MAP3K8.4  | 0 | 1.004265 | 0.338 | 0.112 | 0 | NK cells | MAP3K8  |
| 11107 | KIR3DL1.1 | 0 | 1.002213 | 0.162 | 0.002 | 0 | NK cells | KIR3DL1 |
| 11108 | B2M.6     | 0 | 0.99731  | 1     | 0.999 | 0 | NK cells | B2M     |
| 11109 | TIGIT.1   | 0 | 0.99371  | 0.297 | 0.034 | 0 | NK cells | TIGIT   |
| 11110 | PLA2G16.2 | 0 | 0.990489 | 0.327 | 0.047 | 0 | NK cells | PLA2G16 |
| 11111 | ADGRE5.5  | 0 | 0.983761 | 0.551 | 0.252 | 0 | NK cells | ADGRE5  |
| 11112 | BST2.5    | 0 | 0.980942 | 0.698 | 0.42  | 0 | NK cells | BST2    |
| 11113 | ITGB7.6   | 0 | 0.979801 | 0.512 | 0.231 | 0 | NK cells | ITGB7   |
| 11114 | DBI.4     | 0 | 0.979051 | 0.809 | 0.584 | 0 | NK cells | DBI     |
| 11115 | KIR3DL2.1 | 0 | 0.977864 | 0.196 | 0.008 | 0 | NK cells | KIR3DL2 |
| 11116 | KIR2DL3.1 | 0 | 0.974231 | 0.183 | 0.003 | 0 | NK cells | KIR2DL3 |
| 11117 | KIR2DL1.1 | 0 | 0.973082 | 0.176 | 0.002 | 0 | NK cells | KIR2DL1 |
| 11118 | SYNE2.6   | 0 | 0.966999 | 0.43  | 0.158 | 0 | NK cells | SYNE2   |
| 11119 | PRKCH.6   | 0 | 0.964063 | 0.527 | 0.229 | 0 | NK cells | PRKCH   |
| 11120 | IL18RAP.1 | 0 | 0.961505 | 0.245 | 0.011 | 0 | NK cells | IL18RAP |
| 11121 | SYNGR1.2  | 0 | 0.960301 | 0.253 | 0.037 | 0 | NK cells | SYNGR1  |
| 11122 | GLIPR2.5  | 0 | 0.959389 | 0.486 | 0.177 | 0 | NK cells | GLIPR2  |
| 11123 | HSH2D.5   | 0 | 0.952986 | 0.403 | 0.155 | 0 | NK cells | HSH2D   |
| 11124 | CD38.4    | 0 | 0.950959 | 0.359 | 0.09  | 0 | NK cells | CD38    |
| 11125 | PPIB.5    | 0 | 0.94603  | 0.928 | 0.78  | 0 | NK cells | PPIB    |
| 11126 | PAXX.5    | 0 | 0.945411 | 0.781 | 0.529 | 0 | NK cells | PAXX    |
| 11127 | NCR1.1    | 0 | 0.944131 | 0.243 | 0.003 | 0 | NK cells | NCR1    |
| 11128 | HLA-A.5   | 0 | 0.942081 | 0.976 | 0.898 | 0 | NK cells | HLA-A   |
| 11129 | FASLG.1   | 0 | 0.928679 | 0.255 | 0.011 | 0 | NK cells | FASLG   |
| 11130 | PSME2.5   | 0 | 0.923569 | 0.825 | 0.637 | 0 | NK cells | PSME2   |
| 11131 | GBP5.3    | 0 | 0.921316 | 0.424 | 0.138 | 0 | NK cells | GBP5    |
| 11132 | BIN2.5    | 0 | 0.919235 | 0.733 | 0.48  | 0 | NK cells | BIN2    |
| 11133 | ACTN4.3   | 0 | 0.912003 | 0.379 | 0.118 | 0 | NK cells | ACTN4   |
| 11134 | PPP1CA.4  | 0 | 0.903176 | 0.842 | 0.648 | 0 | NK cells | PPP1CA  |
| 11135 | BHLHE40   | 0 | 0.900392 | 0.281 | 0.042 | 0 | NK cells | BHLHE40 |

|                 |   |          |       |       |   |          |          |
|-----------------|---|----------|-------|-------|---|----------|----------|
| 11136 SYNE1.5   | 0 | 0.900092 | 0.399 | 0.152 | 0 | NK cells | SYNE1    |
| 11137 ACTB.6    | 0 | 0.894366 | 1     | 0.999 | 0 | NK cells | ACTB     |
| 11138 SH3BGRL3  | 0 | 0.893448 | 0.987 | 0.937 | 0 | NK cells | SH3BGRL3 |
| 11139 ADRB2.1   | 0 | 0.892566 | 0.267 | 0.039 | 0 | NK cells | ADRB2    |
| 11140 TPI1.5    | 0 | 0.891551 | 0.809 | 0.607 | 0 | NK cells | TPI1     |
| 11141 BSG.3     | 0 | 0.889688 | 0.675 | 0.419 | 0 | NK cells | BSG      |
| 11142 PTPN4.3   | 0 | 0.888952 | 0.379 | 0.125 | 0 | NK cells | PTPN4    |
| 11143 LYAR.6    | 0 | 0.886133 | 0.414 | 0.145 | 0 | NK cells | LYAR     |
| 11144 TGFB3.1   | 0 | 0.883327 | 0.264 | 0.021 | 0 | NK cells | TGFB3    |
| 11145 PSMB10.4  | 0 | 0.879777 | 0.774 | 0.575 | 0 | NK cells | PSMB10   |
| 11146 PSMB9.4   | 0 | 0.879058 | 0.858 | 0.668 | 0 | NK cells | PSMB9    |
| 11147 CYBA.7    | 0 | 0.878013 | 0.921 | 0.717 | 0 | NK cells | CYBA     |
| 11148 NDUFB2.4  | 0 | 0.873231 | 0.821 | 0.627 | 0 | NK cells | NDUFB2   |
| 11149 MYO1F.6   | 0 | 0.872013 | 0.46  | 0.149 | 0 | NK cells | MYO1F    |
| 11150 ITGB1.5   | 0 | 0.871528 | 0.457 | 0.183 | 0 | NK cells | ITGB1    |
| 11151 ID2.2     | 0 | 0.869161 | 0.349 | 0.111 | 0 | NK cells | ID2      |
| 11152 RUNX3.2   | 0 | 0.864938 | 0.342 | 0.1   | 0 | NK cells | RUNX3    |
| 11153 LGALS9B.1 | 0 | 0.863443 | 0.217 | 0.002 | 0 | NK cells | LGALS9B  |
| 11154 MYL12A.6  | 0 | 0.858431 | 0.99  | 0.943 | 0 | NK cells | MYL12A   |
| 11155 UBB.5     | 0 | 0.855466 | 0.926 | 0.797 | 0 | NK cells | UBB      |
| 11156 NMUR1.1   | 0 | 0.845109 | 0.232 | 0.005 | 0 | NK cells | NMUR1    |
| 11157 HLA-B.4   | 0 | 0.837702 | 1     | 0.992 | 0 | NK cells | HLA-B    |
| 11158 CEP78.1   | 0 | 0.837108 | 0.288 | 0.05  | 0 | NK cells | CEP78    |
| 11159 EMP3.6    | 0 | 0.835514 | 0.932 | 0.779 | 0 | NK cells | EMP3     |
| 11160 ACTG1.3   | 0 | 0.835409 | 0.982 | 0.95  | 0 | NK cells | ACTG1    |
| 11161 GUK1.3    | 0 | 0.825709 | 0.794 | 0.593 | 0 | NK cells | GUK1     |
| 11162 TRGV7.1   | 0 | 0.818084 | 0.222 | 0.017 | 0 | NK cells | TRGV7    |
| 11163 NFATC2.4  | 0 | 0.773001 | 0.302 | 0.091 | 0 | NK cells | NFATC2   |
| 11164 ABHD17A.1 | 0 | 0.766824 | 0.286 | 0.084 | 0 | NK cells | ABHD17A  |
| 11165 FBXO6.2   | 0 | 0.765036 | 0.283 | 0.071 | 0 | NK cells | FBXO6    |
| 11166 LPCAT1.1  | 0 | 0.763835 | 0.272 | 0.067 | 0 | NK cells | LPCAT1   |
| 11167 TFDP2.4   | 0 | 0.760149 | 0.307 | 0.091 | 0 | NK cells | TFDP2    |
| 11168 HAVCR2    | 0 | 0.757825 | 0.211 | 0.023 | 0 | NK cells | HAVCR2   |
| 11169 S100A4.6  | 0 | 0.755784 | 0.919 | 0.511 | 0 | NK cells | S100A4   |
| 11170 SLAMF7.2  | 0 | 0.75229  | 0.236 | 0.039 | 0 | NK cells | SLAMF7   |
| 11171 ASCL2.1   | 0 | 0.749864 | 0.199 | 0.033 | 0 | NK cells | ASCL2    |
| 11172 PSME1.3   | 0 | 0.74878  | 0.94  | 0.854 | 0 | NK cells | PSME1    |
| 11173 CHST2     | 0 | 0.743656 | 0.215 | 0.034 | 0 | NK cells | CHST2    |
| 11174 IFITM3.6  | 0 | 0.74286  | 0.871 | 0.527 | 0 | NK cells | IFITM3   |
| 11175 ITGAM.2   | 0 | 0.727805 | 0.272 | 0.069 | 0 | NK cells | ITGAM    |
| 11176 MYL12B.4  | 0 | 0.720928 | 0.907 | 0.787 | 0 | NK cells | MYL12B   |
| 11177 OSBPL5    | 0 | 0.718886 | 0.214 | 0.022 | 0 | NK cells | OSBPL5   |
| 11178 KLRC2     | 0 | 0.700858 | 0.138 | 0.005 | 0 | NK cells | KLRC2    |
| 11179 CTBP2.1   | 0 | 0.69587  | 0.199 | 0.021 | 0 | NK cells | CTBP2    |
| 11180 MCTP2.1   | 0 | 0.679094 | 0.254 | 0.065 | 0 | NK cells | MCTP2    |
| 11181 RAC2.5    | 0 | 0.678386 | 0.949 | 0.904 | 0 | NK cells | RAC2     |
| 11182 CCL3      | 0 | 0.677949 | 0.109 | 0.009 | 0 | NK cells | CCL3     |

|                 |   |          |       |       |            |           |
|-----------------|---|----------|-------|-------|------------|-----------|
| 11183 MYBL1     | 0 | 0.677576 | 0.176 | 0.015 | 0 NK cells | MYBL1     |
| 11184 RGS3.2    | 0 | 0.667573 | 0.234 | 0.053 | 0 NK cells | RGS3      |
| 11185 PPP2R2B.1 | 0 | 0.665716 | 0.19  | 0.011 | 0 NK cells | PPP2R2B   |
| 11186 SLA2.2    | 0 | 0.658266 | 0.222 | 0.049 | 0 NK cells | SLA2      |
| 11187 MLC1.1    | 0 | 0.64502  | 0.177 | 0.005 | 0 NK cells | MLC1      |
| 11188 TSPAN2.1  | 0 | 0.638382 | 0.201 | 0.028 | 0 NK cells | TSPAN2    |
| 11189 PRR5L.1   | 0 | 0.630503 | 0.178 | 0.017 | 0 NK cells | PRR5L     |
| 11190 LINC00299 | 0 | 0.629469 | 0.146 | 0.002 | 0 NK cells | LINC00299 |
| 11191 EOMES.1   | 0 | 0.620657 | 0.179 | 0.015 | 0 NK cells | EOMES     |
| 11192 F2R.2     | 0 | 0.619481 | 0.159 | 0.013 | 0 NK cells | F2R       |
| 11193 MYL6.5    | 0 | 0.612191 | 0.983 | 0.945 | 0 NK cells | MYL6      |
| 11194 NCAM1     | 0 | 0.61027  | 0.153 | 0.001 | 0 NK cells | NCAM1     |
| 11195 RAMP1.2   | 0 | 0.608639 | 0.145 | 0.004 | 0 NK cells | RAMP1     |
| 11196 LINC02084 | 0 | 0.596008 | 0.168 | 0.015 | 0 NK cells | LINC02084 |
| 11197 CXCR2     | 0 | 0.595599 | 0.155 | 0.012 | 0 NK cells | CXCR2     |
| 11198 GK5       | 0 | 0.57244  | 0.174 | 0.03  | 0 NK cells | GK5       |
| 11199 FUT11     | 0 | 0.569826 | 0.182 | 0.035 | 0 NK cells | FUT11     |
| 11200 H3F3B.3   | 0 | 0.568199 | 0.983 | 0.948 | 0 NK cells | H3F3B     |
| 11201 PLEKHG3.1 | 0 | 0.549032 | 0.149 | 0.011 | 0 NK cells | PLEKHG3   |
| 11202 NCALD     | 0 | 0.506391 | 0.145 | 0.022 | 0 NK cells | NCALD     |
| 11203 MMP23B    | 0 | 0.47983  | 0.121 | 0.007 | 0 NK cells | MMP23B    |
| 11204 PDGFD     | 0 | 0.457982 | 0.115 | 0.005 | 0 NK cells | PDGFD     |
| 11205 ERBB2     | 0 | 0.416648 | 0.103 | 0.005 | 0 NK cells | ERBB2     |
| 11206 RAB27B.1  | 0 | 0.410742 | 0.112 | 0.008 | 0 NK cells | RAB27B    |
| 11207 TRGV9.1   | 0 | 0.40831  | 0.22  | 0.032 | 0 NK cells | TRGV9     |
| 11208 APOBEC3H  | 0 | 0.345088 | 0.103 | 0.008 | 0 NK cells | APOBEC3H  |
| 11209 RPS3.4    | 0 | -0.53086 | 0.996 | 0.993 | 0 NK cells | RPS3      |
| 11210 RPL3.4    | 0 | -0.55018 | 0.987 | 0.986 | 0 NK cells | RPL3      |
| 11211 RPL6.3    | 0 | -0.58088 | 0.99  | 0.991 | 0 NK cells | RPL6      |
| 11212 RPLP1.6   | 0 | -0.58653 | 1     | 0.997 | 0 NK cells | RPLP1     |
| 11213 RPS27A.4  | 0 | -0.60312 | 0.998 | 0.994 | 0 NK cells | RPS27A    |
| 11214 FAU.4     | 0 | -0.6054  | 0.997 | 0.998 | 0 NK cells | FAU       |
| 11215 RPLP2.5   | 0 | -0.61509 | 0.926 | 0.972 | 0 NK cells | RPLP2     |
| 11216 RPS7.4    | 0 | -0.62305 | 0.995 | 0.993 | 0 NK cells | RPS7      |
| 11217 RPL41.4   | 0 | -0.63715 | 1     | 0.999 | 0 NK cells | RPL41     |
| 11218 RPS27.6   | 0 | -0.6402  | 0.999 | 0.994 | 0 NK cells | RPS27     |
| 11219 RPL7A.4   | 0 | -0.64501 | 0.99  | 0.992 | 0 NK cells | RPL7A     |
| 11220 RPS14.6   | 0 | -0.65689 | 0.982 | 0.992 | 0 NK cells | RPS14     |
| 11221 RPL24.4   | 0 | -0.67534 | 0.959 | 0.987 | 0 NK cells | RPL24     |
| 11222 NACA.5    | 0 | -0.6895  | 0.972 | 0.992 | 0 NK cells | NACA      |
| 11223 RPS15.4   | 0 | -0.69738 | 0.998 | 0.994 | 0 NK cells | RPS15     |
| 11224 RPL37.6   | 0 | -0.70226 | 0.962 | 0.981 | 0 NK cells | RPL37     |
| 11225 RPL14.5   | 0 | -0.71034 | 0.985 | 0.989 | 0 NK cells | RPL14     |
| 11226 RPS24.6   | 0 | -0.71083 | 0.997 | 0.994 | 0 NK cells | RPS24     |
| 11227 RPS19.3   | 0 | -0.717   | 0.998 | 0.993 | 0 NK cells | RPS19     |
| 11228 TPT1.5    | 0 | -0.74988 | 0.981 | 0.995 | 0 NK cells | TPT1      |
| 11229 RPL28.4   | 0 | -0.75578 | 0.998 | 0.998 | 0 NK cells | RPL28     |



|                |   |          |       |       |            |        |
|----------------|---|----------|-------|-------|------------|--------|
| 11230 RPL4.3   | 0 | -0.75584 | 0.757 | 0.917 | 0 NK cells | RPL4   |
| 11231 RPS15A.5 | 0 | -0.77179 | 0.998 | 0.996 | 0 NK cells | RPS15A |
| 11232 RPL10.4  | 0 | -0.79592 | 1     | 0.995 | 0 NK cells | RPL10  |
| 11233 RPS6.5   | 0 | -0.79861 | 0.983 | 0.989 | 0 NK cells | RPS6   |
| 11234 EEF2.5   | 0 | -0.81177 | 0.842 | 0.942 | 0 NK cells | EEF2   |
| 11235 RPS28.6  | 0 | -0.82784 | 1     | 0.994 | 0 NK cells | RPS28  |
| 11236 RPS21.6  | 0 | -0.86157 | 0.985 | 0.988 | 0 NK cells | RPS21  |
| 11237 RPS3A.5  | 0 | -0.86262 | 0.993 | 0.991 | 0 NK cells | RPS3A  |
| 11238 RPL10A.5 | 0 | -0.86304 | 0.873 | 0.96  | 0 NK cells | RPL10A |
| 11239 RPL35A.6 | 0 | -0.86908 | 0.976 | 0.99  | 0 NK cells | RPL35A |
| 11240 RPS25.5  | 0 | -0.87887 | 0.979 | 0.992 | 0 NK cells | RPS25  |
| 11241 RPS4X.5  | 0 | -0.88262 | 0.995 | 0.99  | 0 NK cells | RPS4X  |
| 11242 RPS9.4   | 0 | -0.89262 | 0.958 | 0.994 | 0 NK cells | RPS9   |
| 11243 EEF1A1.4 | 0 | -0.89304 | 0.999 | 0.997 | 0 NK cells | EEF1A1 |
| 11244 SELL.5   | 0 | -0.89834 | 0.406 | 0.784 | 0 NK cells | SELL   |
| 11245 RPL36.6  | 0 | -0.90287 | 0.992 | 0.989 | 0 NK cells | RPL36  |
| 11246 RPL34.6  | 0 | -0.92155 | 0.997 | 0.995 | 0 NK cells | RPL34  |
| 11247 RACK1.5  | 0 | -0.92643 | 0.963 | 0.988 | 0 NK cells | RACK1  |
| 11248 RPL22.5  | 0 | -0.9281  | 0.929 | 0.981 | 0 NK cells | RPL22  |
| 11249 RPL19.3  | 0 | -0.93171 | 0.999 | 0.995 | 0 NK cells | RPL19  |
| 11250 RPL12.5  | 0 | -0.94145 | 0.992 | 0.992 | 0 NK cells | RPL12  |
| 11251 RPL18.4  | 0 | -0.95639 | 0.988 | 0.991 | 0 NK cells | RPL18  |
| 11252 RPLP0.3  | 0 | -0.95905 | 0.973 | 0.987 | 0 NK cells | RPLP0  |
| 11253 PABPC1.4 | 0 | -0.96928 | 0.842 | 0.949 | 0 NK cells | PABPC1 |
| 11254 RPL5.5   | 0 | -0.96986 | 0.973 | 0.985 | 0 NK cells | RPL5   |
| 11255 RPL9.4   | 0 | -0.97764 | 0.949 | 0.987 | 0 NK cells | RPL9   |
| 11256 RPS18.5  | 0 | -0.97852 | 0.997 | 0.991 | 0 NK cells | RPS18  |
| 11257 RPL30.4  | 0 | -0.98883 | 0.997 | 0.997 | 0 NK cells | RPL30  |
| 11258 RPL29.5  | 0 | -0.99595 | 0.995 | 0.993 | 0 NK cells | RPL29  |
| 11259 RPS2.3   | 0 | -0.99801 | 0.635 | 0.871 | 0 NK cells | RPS2   |
| 11260 RPL13.4  | 0 | -1.04611 | 0.998 | 0.992 | 0 NK cells | RPL13  |
| 11261 RPL39.5  | 0 | -1.06339 | 0.999 | 0.997 | 0 NK cells | RPL39  |
| 11262 RPS23.6  | 0 | -1.07186 | 0.996 | 0.992 | 0 NK cells | RPS23  |
| 11263 RPL8.5   | 0 | -1.08053 | 0.986 | 0.993 | 0 NK cells | RPL8   |
| 11264 RPL11.4  | 0 | -1.08764 | 0.995 | 0.995 | 0 NK cells | RPL11  |
| 11265 RPS12.7  | 0 | -1.08801 | 0.998 | 0.995 | 0 NK cells | RPS12  |
| 11266 EEF1B2.5 | 0 | -1.10994 | 0.909 | 0.972 | 0 NK cells | EEF1B2 |
| 11267 RPL32.4  | 0 | -1.17139 | 0.998 | 0.994 | 0 NK cells | RPL32  |
| 11268 RPS13.4  | 0 | -1.20162 | 0.995 | 0.993 | 0 NK cells | RPS13  |
| 11269 RPS5.6   | 0 | -1.20533 | 0.977 | 0.985 | 0 NK cells | RPS5   |
| 11270 RPS8.6   | 0 | -1.21513 | 0.991 | 0.992 | 0 NK cells | RPS8   |
| 11271 RGS10.5  | 0 | -1.24587 | 0.18  | 0.557 | 0 NK cells | RGS10  |
| 11272 CD27.6   | 0 | -1.25501 | 0.091 | 0.444 | 0 NK cells | CD27   |
| 11273 RPL18A.5 | 0 | -1.26844 | 0.994 | 0.991 | 0 NK cells | RPL18A |
| 11274 LEF1.6   | 0 | -1.55753 | 0.096 | 0.455 | 0 NK cells | LEF1   |
| 11275 IL7R.6   | 0 | -1.93496 | 0.109 | 0.494 | 0 NK cells | IL7R   |
| 11276 NCF1.5   | 0 | -2.08344 | 0.072 | 0.515 | 0 NK cells | NCF1   |

|       |            |           |          |       |       |           |          |            |
|-------|------------|-----------|----------|-------|-------|-----------|----------|------------|
| 11277 | CCR7.7     | 0         | -2.09098 | 0.078 | 0.572 | 0         | NK cells | CCR7       |
| 11278 | LTB.5      | 0         | -2.52191 | 0.265 | 0.848 | 0         | NK cells | LTB        |
| 11279 | IFNGR2.5   | 8.48E-306 | -1.2085  | 0.015 | 0.35  | 1.59E-301 | NK cells | IFNGR2     |
| 11280 | DNAJC1.5   | 9.78E-305 | 0.768723 | 0.358 | 0.126 | 1.84E-300 | NK cells | DNAJC1     |
| 11281 | MYC.5      | 3.96E-304 | -1.39433 | 0.086 | 0.427 | 7.44E-300 | NK cells | MYC        |
| 11282 | ANXA2.6    | 7.50E-304 | 0.727778 | 0.606 | 0.283 | 1.41E-299 | NK cells | ANXA2      |
| 11283 | RPL26.5    | 8.24E-303 | -0.53115 | 0.987 | 0.989 | 1.55E-298 | NK cells | RPL26      |
| 11284 | SERF2.5    | 2.66E-302 | 0.461926 | 0.991 | 0.986 | 5.00E-298 | NK cells | SERF2      |
| 11285 | AC116366.8 | 1.19E-301 | 0.873455 | 0.377 | 0.14  | 1.54E-296 | NK cells | AC116366.3 |
| 11286 | CAPN2.6    | 1.01E-300 | 0.809483 | 0.439 | 0.183 | 1.89E-296 | NK cells | CAPN2      |
| 11287 | UBE2F.3    | 4.13E-300 | 0.801319 | 0.361 | 0.131 | 7.75E-296 | NK cells | UBE2F      |
| 11288 | PXN.4      | 2.80E-298 | 0.825016 | 0.393 | 0.152 | 5.26E-294 | NK cells | PXN        |
| 11289 | CLSTN3     | 1.41E-297 | 0.483323 | 0.146 | 0.024 | 2.65E-293 | NK cells | CLSTN3     |
| 11290 | TMSB4X.6   | 1.78E-297 | 0.407362 | 1     | 0.998 | 3.35E-293 | NK cells | TMSB4X     |
| 11291 | EEF1D.4    | 1.80E-297 | -0.51858 | 0.961 | 0.986 | 3.38E-293 | NK cells | EEF1D      |
| 11292 | SEPT7.5    | 4.49E-297 | 0.796175 | 0.809 | 0.641 | 8.43E-293 | NK cells | Sep-07     |
| 11293 | PPP1R18.3  | 6.96E-296 | 0.920009 | 0.692 | 0.459 | 1.31E-291 | NK cells | PPP1R18    |
| 11294 | GAPDH.5    | 8.07E-295 | 0.679806 | 0.957 | 0.898 | 1.52E-290 | NK cells | GAPDH      |
| 11295 | DAB2.1     | 2.41E-293 | 0.397204 | 0.102 | 0.012 | 4.53E-289 | NK cells | DAB2       |
| 11296 | MSN.4      | 4.11E-292 | 0.940397 | 0.692 | 0.466 | 7.73E-288 | NK cells | MSN        |
| 11297 | LINC02384  | 1.17E-291 | 0.592249 | 0.16  | 0.03  | 2.20E-287 | NK cells | LINC02384  |
| 11298 | PFDN5.3    | 1.73E-290 | -0.51433 | 0.936 | 0.982 | 3.25E-286 | NK cells | PFDN5      |
| 11299 | PTPN12.2   | 2.21E-288 | 0.59828  | 0.179 | 0.037 | 4.15E-284 | NK cells | PTPN12     |
| 11300 | NDUFB7.6   | 2.63E-288 | 0.881263 | 0.679 | 0.441 | 4.95E-284 | NK cells | NDUFB7     |
| 11301 | TSPAN32.3  | 3.67E-288 | 0.827894 | 0.348 | 0.127 | 6.89E-284 | NK cells | TSPAN32    |
| 11302 | MVD.1      | 1.59E-287 | 0.697692 | 0.271 | 0.08  | 2.98E-283 | NK cells | MVD        |
| 11303 | CALR.4     | 2.99E-286 | 1.013317 | 0.774 | 0.591 | 5.62E-282 | NK cells | CALR       |
| 11304 | G6PD.3     | 3.13E-284 | 0.846027 | 0.419 | 0.178 | 5.88E-280 | NK cells | G6PD       |
| 11305 | TCF7.6     | 3.22E-283 | -1.48797 | 0.11  | 0.437 | 6.05E-279 | NK cells | TCF7       |
| 11306 | COTL1.4    | 1.12E-282 | -1.04397 | 0.242 | 0.616 | 2.09E-278 | NK cells | COTL1      |
| 11307 | TRBC2.5    | 8.33E-282 | 0.785033 | 0.86  | 0.664 | 1.56E-277 | NK cells | TRBC2      |
| 11308 | PRDM1.1    | 7.63E-281 | 0.548825 | 0.161 | 0.031 | 1.43E-276 | NK cells | PRDM1      |
| 11309 | HLA-E.6    | 2.71E-280 | 0.567535 | 0.975 | 0.955 | 5.10E-276 | NK cells | HLA-E      |
| 11310 | AHNAK.5    | 3.84E-280 | 0.844427 | 0.514 | 0.239 | 7.21E-276 | NK cells | AHNAK      |
| 11311 | SARAF.6    | 3.30E-279 | -0.85922 | 0.791 | 0.894 | 6.20E-275 | NK cells | SARAF      |
| 11312 | ALOX5AP.6  | 5.28E-279 | 1.131628 | 0.583 | 0.345 | 9.91E-275 | NK cells | ALOX5AP    |
| 11313 | ST3GAL4    | 6.83E-279 | 0.396787 | 0.121 | 0.018 | 1.28E-274 | NK cells | ST3GAL4    |
| 11314 | FYN.4      | 2.63E-278 | 0.800428 | 0.377 | 0.146 | 4.94E-274 | NK cells | FYN        |
| 11315 | PAM.1      | 6.49E-278 | 0.430678 | 0.128 | 0.02  | 1.22E-273 | NK cells | PAM        |
| 11316 | AGTRAP.5   | 8.83E-278 | 0.841105 | 0.471 | 0.21  | 1.66E-273 | NK cells | AGTRAP     |
| 11317 | SIGLEC7.1  | 3.53E-276 | 0.535015 | 0.131 | 0.021 | 6.62E-272 | NK cells | SIGLEC7    |
| 11318 | AGK        | 1.60E-275 | 0.627786 | 0.242 | 0.067 | 3.01E-271 | NK cells | AGK        |
| 11319 | CD3D.5     | 7.11E-272 | -1.0829  | 0.198 | 0.56  | 1.33E-267 | NK cells | CD3D       |
| 11320 | CCDC28B.2  | 1.53E-269 | 0.582536 | 0.214 | 0.054 | 2.87E-265 | NK cells | CCDC28B    |
| 11321 | TNFRSF18.2 | 2.03E-268 | 0.553579 | 0.121 | 0.018 | 3.82E-264 | NK cells | TNFRSF18   |
| 11322 | IQGAP1.4   | 7.63E-268 | 0.857678 | 0.535 | 0.28  | 1.43E-263 | NK cells | IQGAP1     |
| 11323 | TXK.4      | 3.53E-267 | 0.819268 | 0.373 | 0.148 | 6.64E-263 | NK cells | TXK        |

|       |           |           |          |       |       |           |          |          |
|-------|-----------|-----------|----------|-------|-------|-----------|----------|----------|
| 11324 | SLC27A3.1 | 1.94E-266 | 0.533616 | 0.171 | 0.037 | 3.65E-262 | NK cells | SLC27A3  |
| 11325 | ZBTB16    | 2.84E-265 | 0.381593 | 0.106 | 0.014 | 5.34E-261 | NK cells | ZBTB16   |
| 11326 | CD52.7    | 2.92E-264 | -0.81006 | 0.537 | 0.846 | 5.48E-260 | NK cells | CD52     |
| 11327 | CLEC2B.3  | 9.03E-264 | 0.862859 | 0.617 | 0.363 | 1.70E-259 | NK cells | CLEC2B   |
| 11328 | ADGRG5    | 2.03E-263 | 0.454871 | 0.142 | 0.026 | 3.81E-259 | NK cells | ADGRG5   |
| 11329 | HSPA5.5   | 3.37E-260 | 0.975668 | 0.612 | 0.375 | 6.33E-256 | NK cells | HSPA5    |
| 11330 | RHOA.5    | 7.34E-258 | 0.561305 | 0.918 | 0.87  | 1.38E-253 | NK cells | RHOA     |
| 11331 | CALHM2.2  | 1.32E-257 | 0.613844 | 0.244 | 0.072 | 2.48E-253 | NK cells | CALHM2   |
| 11332 | ATP2B4.2  | 1.70E-257 | 0.634567 | 0.245 | 0.072 | 3.19E-253 | NK cells | ATP2B4   |
| 11333 | FHL3.1    | 2.93E-256 | 0.642064 | 0.214 | 0.057 | 5.50E-252 | NK cells | FHL3     |
| 11334 | RPL7.4    | 3.73E-256 | -0.67061 | 0.699 | 0.88  | 7.01E-252 | NK cells | RPL7     |
| 11335 | CD79A.5   | 3.09E-255 | -2.40415 | 0.034 | 0.328 | 5.80E-251 | NK cells | CD79A    |
| 11336 | SDF4.3    | 3.21E-255 | 0.811574 | 0.492 | 0.247 | 6.02E-251 | NK cells | SDF4     |
| 11337 | RPS16.4   | 3.83E-254 | -0.63966 | 0.831 | 0.932 | 7.20E-250 | NK cells | RPS16    |
| 11338 | YWHAZ.6   | 1.09E-253 | 0.644242 | 0.887 | 0.798 | 2.04E-249 | NK cells | YWHAZ    |
| 11339 | ENPP4     | 2.52E-253 | 0.459067 | 0.135 | 0.024 | 4.74E-249 | NK cells | ENPP4    |
| 11340 | SASH3.3   | 2.62E-253 | 0.881469 | 0.559 | 0.316 | 4.91E-249 | NK cells | SASH3    |
| 11341 | FKBP11.4  | 2.12E-252 | 0.757695 | 0.388 | 0.16  | 3.98E-248 | NK cells | FKBP11   |
| 11342 | SELPLG.4  | 9.42E-252 | 0.830644 | 0.684 | 0.447 | 1.77E-247 | NK cells | SELPLG   |
| 11343 | TNFSF14   | 1.77E-251 | 0.42369  | 0.128 | 0.022 | 3.33E-247 | NK cells | TNFSF14  |
| 11344 | GSN.3     | 2.12E-250 | 0.648435 | 0.219 | 0.061 | 3.99E-246 | NK cells | GSN      |
| 11345 | PTPRC.4   | 9.08E-249 | 0.627313 | 0.918 | 0.85  | 1.71E-244 | NK cells | PTPRC    |
| 11346 | RPL21.4   | 1.64E-248 | -0.58414 | 0.939 | 0.971 | 3.08E-244 | NK cells | RPL21    |
| 11347 | ITGAL.6   | 1.33E-247 | 0.764359 | 0.345 | 0.135 | 2.51E-243 | NK cells | ITGAL    |
| 11348 | PDIA6.5   | 5.59E-245 | 0.827883 | 0.582 | 0.351 | 1.05E-240 | NK cells | PDIA6    |
| 11349 | LDHB.5    | 1.58E-243 | -1.0794  | 0.603 | 0.752 | 2.96E-239 | NK cells | LDHB     |
| 11350 | DSTN.4    | 3.83E-242 | 0.856022 | 0.491 | 0.257 | 7.20E-238 | NK cells | DSTN     |
| 11351 | PLOD1     | 1.24E-241 | 0.514177 | 0.155 | 0.033 | 2.34E-237 | NK cells | PLOD1    |
| 11352 | IL18R1    | 1.71E-240 | 0.359797 | 0.103 | 0.015 | 3.21E-236 | NK cells | IL18R1   |
| 11353 | DDOST.5   | 2.80E-228 | 0.767034 | 0.642 | 0.425 | 5.26E-224 | NK cells | DDOST    |
| 11354 | LSP1.5    | 2.93E-228 | 0.596026 | 0.891 | 0.812 | 5.49E-224 | NK cells | LSP1     |
| 11355 | BCL2L1.3  | 4.10E-228 | 0.583506 | 0.233 | 0.071 | 7.70E-224 | NK cells | BCL2L1   |
| 11356 | RPL15.4   | 1.08E-227 | -0.42297 | 0.96  | 0.983 | 2.03E-223 | NK cells | RPL15    |
| 11357 | CD226.1   | 2.70E-226 | 0.481076 | 0.152 | 0.033 | 5.07E-222 | NK cells | CD226    |
| 11358 | NOSIP.6   | 3.04E-225 | -1.13539 | 0.42  | 0.649 | 5.70E-221 | NK cells | NOSIP    |
| 11359 | MS4A1.6   | 5.85E-225 | -2.53894 | 0.024 | 0.29  | 1.10E-220 | NK cells | MS4A1    |
| 11360 | CAST.4    | 9.19E-224 | 0.823122 | 0.579 | 0.34  | 1.73E-219 | NK cells | CAST     |
| 11361 | TPM4.6    | 2.56E-223 | 0.904898 | 0.448 | 0.23  | 4.80E-219 | NK cells | TPM4     |
| 11362 | CAMK4.6   | 1.50E-221 | -1.05631 | 0.057 | 0.329 | 2.81E-217 | NK cells | CAMK4    |
| 11363 | RORA.3    | 9.16E-219 | 0.624564 | 0.265 | 0.091 | 1.72E-214 | NK cells | RORA     |
| 11364 | HENMT1.1  | 1.36E-218 | 0.584202 | 0.24  | 0.077 | 2.55E-214 | NK cells | HENMT1   |
| 11365 | OPTN.5    | 2.47E-218 | 0.671395 | 0.384 | 0.168 | 4.64E-214 | NK cells | OPTN     |
| 11366 | NPM1.5    | 8.81E-216 | -0.6089  | 0.836 | 0.915 | 1.65E-211 | NK cells | NPM1     |
| 11367 | SLC15A4   | 1.25E-215 | 0.449269 | 0.125 | 0.024 | 2.36E-211 | NK cells | SLC15A4  |
| 11368 | HLA-DQA1  | 7.36E-215 | -1.68968 | 0.035 | 0.296 | 1.38E-210 | NK cells | HLA-DQA1 |
| 11369 | WDR1.3    | 7.02E-214 | 0.765947 | 0.675 | 0.496 | 1.32E-209 | NK cells | WDR1     |
| 11370 | IDH2.3    | 1.25E-213 | 0.808623 | 0.467 | 0.256 | 2.35E-209 | NK cells | IDH2     |

|       |           |           |          |       |       |           |          |            |
|-------|-----------|-----------|----------|-------|-------|-----------|----------|------------|
| 11371 | P4HB.3    | 2.72E-213 | 0.818607 | 0.579 | 0.371 | 5.11E-209 | NK cells | P4HB       |
| 11372 | MIB2.2    | 5.94E-212 | 0.673303 | 0.271 | 0.097 | 1.12E-207 | NK cells | MIB2       |
| 11373 | TLN1.5    | 6.27E-212 | 0.718586 | 0.452 | 0.225 | 1.18E-207 | NK cells | TLN1       |
| 11374 | POLR2L.4  | 1.72E-211 | 0.766968 | 0.716 | 0.524 | 3.24E-207 | NK cells | POLR2L     |
| 11375 | HLA-DQB1  | 7.08E-211 | -1.73788 | 0.058 | 0.317 | 1.33E-206 | NK cells | HLA-DQB1   |
| 11376 | UBC.5     | 2.71E-210 | 0.584194 | 0.914 | 0.847 | 5.08E-206 | NK cells | UBC        |
| 11377 | SLC25A20  | 3.94E-210 | 0.598625 | 0.264 | 0.093 | 7.39E-206 | NK cells | SLC25A20   |
| 11378 | COX8A.5   | 1.10E-209 | 0.66324  | 0.766 | 0.602 | 2.07E-205 | NK cells | COX8A      |
| 11379 | MYO1G.5   | 5.44E-208 | 0.753118 | 0.48  | 0.254 | 1.02E-203 | NK cells | MYO1G      |
| 11380 | HSP90B1.5 | 2.25E-207 | 0.631434 | 0.689 | 0.491 | 4.23E-203 | NK cells | HSP90B1    |
| 11381 | USP28.1   | 5.08E-207 | 0.542207 | 0.202 | 0.059 | 9.55E-203 | NK cells | USP28      |
| 11382 | AC090152. | 2.05E-206 | 0.475962 | 0.171 | 0.044 | 3.85E-202 | NK cells | AC090152.1 |
| 11383 | RAB29.3   | 2.21E-206 | 0.707618 | 0.368 | 0.163 | 4.15E-202 | NK cells | RAB29      |
| 11384 | ZNF683.1  | 3.81E-206 | 0.483387 | 0.135 | 0.028 | 7.16E-202 | NK cells | ZNF683     |
| 11385 | RPL23A.4  | 7.68E-206 | -0.46908 | 0.923 | 0.966 | 1.44E-201 | NK cells | RPL23A     |
| 11386 | SPINT2.5  | 9.89E-206 | -0.83421 | 0.028 | 0.283 | 1.86E-201 | NK cells | SPINT2     |
| 11387 | RALY.2    | 2.10E-205 | 0.761198 | 0.613 | 0.414 | 3.94E-201 | NK cells | RALY       |
| 11388 | CYTOR.6   | 2.60E-204 | 0.591966 | 0.258 | 0.091 | 4.88E-200 | NK cells | CYTOR      |
| 11389 | ZNF600    | 2.83E-204 | 0.506633 | 0.16  | 0.04  | 5.33E-200 | NK cells | ZNF600     |
| 11390 | ZEB2.4    | 3.18E-204 | 0.67718  | 0.332 | 0.136 | 5.97E-200 | NK cells | ZEB2       |
| 11391 | CD53.5    | 5.03E-204 | 0.701106 | 0.754 | 0.582 | 9.46E-200 | NK cells | CD53       |
| 11392 | RNF125.4  | 8.58E-204 | 0.68536  | 0.319 | 0.13  | 1.61E-199 | NK cells | RNF125     |
| 11393 | RPSA.4    | 5.59E-203 | -0.5565  | 0.877 | 0.944 | 1.05E-198 | NK cells | RPSA       |
| 11394 | RNF213.7  | 9.05E-203 | 0.806834 | 0.599 | 0.382 | 1.70E-198 | NK cells | RNF213     |
| 11395 | PLAC8.4   | 1.45E-201 | 0.726576 | 0.705 | 0.499 | 2.73E-197 | NK cells | PLAC8      |
| 11396 | AIF1.7    | 2.68E-201 | -1.95679 | 0.05  | 0.304 | 5.04E-197 | NK cells | AIF1       |
| 11397 | MAL.6     | 3.40E-201 | -1.0029  | 0.034 | 0.285 | 6.39E-197 | NK cells | MAL        |
| 11398 | GNGT2     | 2.97E-200 | 0.435036 | 0.133 | 0.029 | 5.58E-196 | NK cells | GNGT2      |
| 11399 | RNASET2.4 | 6.90E-199 | -0.84564 | 0.362 | 0.618 | 1.30E-194 | NK cells | RNASET2    |
| 11400 | SKAP1.6   | 9.83E-199 | 0.701868 | 0.58  | 0.347 | 1.85E-194 | NK cells | SKAP1      |
| 11401 | HLA-DRA.6 | 1.77E-197 | -3.16497 | 0.193 | 0.419 | 3.33E-193 | NK cells | HLA-DRA    |
| 11402 | FOSL2.1   | 6.81E-196 | 0.465297 | 0.141 | 0.033 | 1.28E-191 | NK cells | FOSL2      |
| 11403 | TBCB.2    | 1.08E-195 | 0.710185 | 0.618 | 0.413 | 2.02E-191 | NK cells | TBCB       |
| 11404 | RAB37.5   | 2.18E-194 | 0.679547 | 0.331 | 0.141 | 4.09E-190 | NK cells | RAB37      |
| 11405 | UBA52.2   | 2.69E-194 | -0.45359 | 0.883 | 0.96  | 5.06E-190 | NK cells | UBA52      |
| 11406 | IQGAP2.6  | 4.33E-194 | 0.626508 | 0.289 | 0.114 | 8.13E-190 | NK cells | IQGAP2     |
| 11407 | CAP1.7    | 9.34E-194 | 0.683665 | 0.727 | 0.571 | 1.75E-189 | NK cells | CAP1       |
| 11408 | FES.2     | 1.96E-193 | 0.609293 | 0.218 | 0.071 | 3.67E-189 | NK cells | FES        |
| 11409 | TGFB1.6   | 3.11E-193 | 0.758033 | 0.488 | 0.272 | 5.84E-189 | NK cells | TGFB1      |
| 11410 | ACOT7     | 3.52E-193 | 0.276719 | 0.11  | 0.021 | 6.62E-189 | NK cells | ACOT7      |
| 11411 | TNFRSF1A. | 5.94E-192 | 0.701424 | 0.368 | 0.172 | 1.12E-187 | NK cells | TNFRSF1A   |
| 11412 | CHCHD10.  | 7.58E-192 | -0.82069 | 0.183 | 0.456 | 1.42E-187 | NK cells | CHCHD10    |
| 11413 | YWHAQ.5   | 8.21E-192 | 0.73628  | 0.591 | 0.398 | 1.54E-187 | NK cells | YWHAQ      |
| 11414 | TPM3.5    | 1.86E-191 | 0.600142 | 0.819 | 0.722 | 3.49E-187 | NK cells | TPM3       |
| 11415 | HMG3.3    | 8.42E-190 | 0.722352 | 0.631 | 0.435 | 1.58E-185 | NK cells | HMG3       |
| 11416 | MIEN1.4   | 1.98E-188 | 0.742161 | 0.555 | 0.347 | 3.72E-184 | NK cells | MIEN1      |
| 11417 | OASL.1    | 7.78E-187 | 0.424774 | 0.145 | 0.035 | 1.46E-182 | NK cells | OASL       |

|       |           |           |          |       |       |           |          |            |
|-------|-----------|-----------|----------|-------|-------|-----------|----------|------------|
| 11418 | EIF3E.6   | 2.95E-186 | -0.69612 | 0.453 | 0.696 | 5.55E-182 | NK cells | EIF3E      |
| 11419 | ZFAS1.3   | 3.17E-186 | -0.72356 | 0.335 | 0.601 | 5.95E-182 | NK cells | ZFAS1      |
| 11420 | AXIN1     | 2.28E-185 | 0.431425 | 0.143 | 0.035 | 4.28E-181 | NK cells | AXIN1      |
| 11421 | AC004865. | 8.08E-184 | 0.496441 | 0.17  | 0.048 | 1.52E-179 | NK cells | AC004865.2 |
| 11422 | SH2D1A.3  | 1.89E-182 | 0.570893 | 0.296 | 0.118 | 3.55E-178 | NK cells | SH2D1A     |
| 11423 | IL12RB1.1 | 2.70E-182 | 0.515249 | 0.201 | 0.064 | 5.08E-178 | NK cells | IL12RB1    |
| 11424 | EIF3H.3   | 4.58E-182 | -0.62741 | 0.556 | 0.768 | 8.60E-178 | NK cells | EIF3H      |
| 11425 | UTS2      | 1.11E-181 | 0.521404 | 0.2   | 0.063 | 2.09E-177 | NK cells | UTS2       |
| 11426 | RAP1GAP2  | 1.30E-180 | 0.424206 | 0.141 | 0.035 | 2.43E-176 | NK cells | RAP1GAP2   |
| 11427 | IGHM.4    | 5.31E-180 | -1.82834 | 0.043 | 0.275 | 9.97E-176 | NK cells | IGHM       |
| 11428 | CHCHD2.3  | 9.32E-179 | 0.538746 | 0.862 | 0.802 | 1.75E-174 | NK cells | CHCHD2     |
| 11429 | TMED9.4   | 2.66E-178 | 0.69632  | 0.521 | 0.315 | 5.00E-174 | NK cells | TMED9      |
| 11430 | FTL.4     | 3.35E-178 | -1.18515 | 0.984 | 0.994 | 6.29E-174 | NK cells | FTL        |
| 11431 | RPL35.5   | 7.33E-178 | -0.36483 | 0.979 | 0.983 | 1.38E-173 | NK cells | RPL35      |
| 11432 | UBL5.3    | 4.33E-176 | 0.583801 | 0.838 | 0.73  | 8.13E-172 | NK cells | UBL5       |
| 11433 | HLA-DMA.  | 4.85E-176 | -1.37064 | 0.126 | 0.361 | 9.11E-172 | NK cells | HLA-DMA    |
| 11434 | PTPN22.1  | 1.13E-175 | 0.634093 | 0.283 | 0.114 | 2.12E-171 | NK cells | PTPN22     |
| 11435 | BANK1.4   | 9.02E-175 | -1.23503 | 0.008 | 0.224 | 1.69E-170 | NK cells | BANK1      |
| 11436 | ACTR3.3   | 2.36E-174 | 0.668958 | 0.763 | 0.657 | 4.44E-170 | NK cells | ACTR3      |
| 11437 | PSMB8.2   | 2.89E-174 | 0.609087 | 0.777 | 0.664 | 5.43E-170 | NK cells | PSMB8      |
| 11438 | SERP1.4   | 1.87E-173 | -0.6111  | 0.602 | 0.788 | 3.52E-169 | NK cells | SERP1      |
| 11439 | CRIP1.4   | 2.51E-173 | 0.725927 | 0.576 | 0.37  | 4.72E-169 | NK cells | CRIP1      |
| 11440 | TOX       | 3.75E-173 | 0.468456 | 0.171 | 0.05  | 7.05E-169 | NK cells | TOX        |
| 11441 | PRDX5.4   | 6.91E-173 | 0.67815  | 0.693 | 0.527 | 1.30E-168 | NK cells | PRDX5      |
| 11442 | RPL13A.3  | 8.79E-173 | -0.64752 | 0.503 | 0.734 | 1.65E-168 | NK cells | RPL13A     |
| 11443 | ARF1.4    | 1.25E-171 | 0.626889 | 0.74  | 0.618 | 2.34E-167 | NK cells | ARF1       |
| 11444 | SDF2L1.3  | 2.88E-171 | 0.765074 | 0.387 | 0.198 | 5.41E-167 | NK cells | SDF2L1     |
| 11445 | KLRK1     | 7.48E-171 | 0.379932 | 0.107 | 0.022 | 1.41E-166 | NK cells | KLRK1      |
| 11446 | SCP2.3    | 1.16E-170 | 0.717032 | 0.518 | 0.323 | 2.19E-166 | NK cells | SCP2       |
| 11447 | GYG1.5    | 4.93E-170 | 0.571445 | 0.337 | 0.154 | 9.26E-166 | NK cells | GYG1       |
| 11448 | CKLF.4    | 1.17E-169 | 0.693677 | 0.439 | 0.237 | 2.20E-165 | NK cells | CKLF       |
| 11449 | ACTN1.6   | 1.94E-169 | -0.82632 | 0.047 | 0.273 | 3.65E-165 | NK cells | ACTN1      |
| 11450 | GAB3      | 9.74E-169 | 0.385677 | 0.125 | 0.029 | 1.83E-164 | NK cells | GAB3       |
| 11451 | NPRL2.2   | 3.31E-168 | 0.608264 | 0.311 | 0.137 | 6.22E-164 | NK cells | NPRL2      |
| 11452 | RPL39L    | 4.29E-168 | 0.312307 | 0.114 | 0.025 | 8.05E-164 | NK cells | RPL39L     |
| 11453 | DRAP1.4   | 8.85E-168 | 0.622925 | 0.698 | 0.528 | 1.66E-163 | NK cells | DRAP1      |
| 11454 | TAP1.4    | 1.22E-167 | 0.68517  | 0.549 | 0.354 | 2.29E-163 | NK cells | TAP1       |
| 11455 | CD58.2    | 2.77E-167 | 0.560423 | 0.227 | 0.083 | 5.21E-163 | NK cells | CD58       |
| 11456 | SLC20A1.2 | 4.79E-167 | 0.572516 | 0.253 | 0.098 | 9.00E-163 | NK cells | SLC20A1    |
| 11457 | CD47.4    | 5.37E-167 | 0.687853 | 0.638 | 0.458 | 1.01E-162 | NK cells | CD47       |
| 11458 | RAB27A.3  | 7.86E-166 | 0.587648 | 0.281 | 0.117 | 1.48E-161 | NK cells | RAB27A     |
| 11459 | LMAN2.4   | 1.28E-165 | 0.660361 | 0.586 | 0.391 | 2.41E-161 | NK cells | LMAN2      |
| 11460 | RAB9A.3   | 1.47E-165 | 0.598813 | 0.312 | 0.139 | 2.77E-161 | NK cells | RAB9A      |
| 11461 | MPST.3    | 2.63E-165 | 0.509151 | 0.21  | 0.073 | 4.95E-161 | NK cells | MPST       |
| 11462 | HSP90AA1  | 2.74E-165 | 0.592701 | 0.808 | 0.707 | 5.15E-161 | NK cells | HSP90AA1   |
| 11463 | CTNNBIP1  | 3.02E-165 | 0.449361 | 0.191 | 0.062 | 5.67E-161 | NK cells | CTNNBIP1   |
| 11464 | CD37.5    | 7.55E-165 | -1.23349 | 0.807 | 0.898 | 1.42E-160 | NK cells | CD37       |

|       |           |           |          |       |       |           |          |           |
|-------|-----------|-----------|----------|-------|-------|-----------|----------|-----------|
| 11465 | CD19.6    | 3.76E-164 | -1.09933 | 0.005 | 0.21  | 7.07E-160 | NK cells | CD19      |
| 11466 | LINC01871 | 4.17E-164 | 0.479554 | 0.158 | 0.045 | 7.83E-160 | NK cells | LINC01871 |
| 11467 | CD3G.5    | 6.76E-164 | -0.75759 | 0.166 | 0.428 | 1.27E-159 | NK cells | CD3G      |
| 11468 | VAMP8.5   | 1.02E-163 | 0.604573 | 0.736 | 0.571 | 1.91E-159 | NK cells | VAMP8     |
| 11469 | DUSP23.5  | 4.32E-163 | 0.586888 | 0.312 | 0.14  | 8.12E-159 | NK cells | DUSP23    |
| 11470 | RMDN3     | 6.21E-162 | 0.437783 | 0.176 | 0.055 | 1.17E-157 | NK cells | RMDN3     |
| 11471 | TCL1A.6   | 2.12E-159 | -2.11251 | 0.016 | 0.219 | 3.98E-155 | NK cells | TCL1A     |
| 11472 | MCUB.5    | 7.04E-158 | -0.66975 | 0.275 | 0.533 | 1.32E-153 | NK cells | MCUB      |
| 11473 | BTF3.5    | 8.28E-158 | -0.40229 | 0.905 | 0.959 | 1.55E-153 | NK cells | BTF3      |
| 11474 | IDS.2     | 1.16E-157 | 0.653458 | 0.386 | 0.2   | 2.18E-153 | NK cells | IDS       |
| 11475 | TMEM50A   | 1.32E-157 | 0.619515 | 0.639 | 0.471 | 2.48E-153 | NK cells | TMEM50A   |
| 11476 | DENND2D   | 1.63E-157 | 0.665852 | 0.602 | 0.395 | 3.06E-153 | NK cells | DENND2D   |
| 11477 | TCF25.2   | 4.87E-157 | 0.851214 | 0.573 | 0.396 | 9.15E-153 | NK cells | TCF25     |
| 11478 | ELOB.3    | 1.79E-156 | 0.481579 | 0.842 | 0.744 | 3.37E-152 | NK cells | ELOB      |
| 11479 | IFI27L2.4 | 2.22E-156 | 0.652195 | 0.39  | 0.206 | 4.18E-152 | NK cells | IFI27L2   |
| 11480 | CCDC85B.3 | 5.39E-156 | 0.635859 | 0.635 | 0.453 | 1.01E-151 | NK cells | CCDC85B   |
| 11481 | IER2.6    | 9.21E-156 | 0.533548 | 0.677 | 0.484 | 1.73E-151 | NK cells | IER2      |
| 11482 | SELENOW   | 1.03E-155 | 0.645594 | 0.649 | 0.481 | 1.93E-151 | NK cells | SELENOW   |
| 11483 | ANXA6.5   | 1.24E-155 | 0.594561 | 0.724 | 0.571 | 2.33E-151 | NK cells | ANXA6     |
| 11484 | LINC00926 | 1.36E-154 | -1.13151 | 0.009 | 0.205 | 2.55E-150 | NK cells | LINC00926 |
| 11485 | GTF3C1    | 7.21E-153 | 0.499194 | 0.187 | 0.063 | 1.36E-148 | NK cells | GTF3C1    |
| 11486 | ADA.3     | 1.75E-152 | 0.544312 | 0.277 | 0.119 | 3.29E-148 | NK cells | ADA       |
| 11487 | EVL.5     | 5.35E-152 | 0.527338 | 0.865 | 0.73  | 1.00E-147 | NK cells | EVL       |
| 11488 | NOP53.4   | 7.48E-152 | -0.64573 | 0.434 | 0.661 | 1.40E-147 | NK cells | NOP53     |
| 11489 | MAPK1.2   | 1.11E-151 | 0.600197 | 0.249 | 0.101 | 2.08E-147 | NK cells | MAPK1     |
| 11490 | SYTL1.4   | 1.66E-151 | 0.67754  | 0.609 | 0.425 | 3.12E-147 | NK cells | SYTL1     |
| 11491 | SSR4.4    | 2.53E-151 | 0.554205 | 0.79  | 0.677 | 4.75E-147 | NK cells | SSR4      |
| 11492 | MYDGF.3   | 1.01E-150 | 0.653313 | 0.473 | 0.285 | 1.91E-146 | NK cells | MYDGF     |
| 11493 | SNHG8.2   | 1.20E-150 | -0.69637 | 0.218 | 0.462 | 2.25E-146 | NK cells | SNHG8     |
| 11494 | YWHAB.6   | 1.41E-150 | 0.474513 | 0.857 | 0.805 | 2.65E-146 | NK cells | YWHAB     |
| 11495 | LDLRAP1.6 | 3.94E-150 | -0.81473 | 0.095 | 0.316 | 7.41E-146 | NK cells | LDLRAP1   |
| 11496 | PSMA7.2   | 4.35E-150 | 0.550327 | 0.772 | 0.678 | 8.17E-146 | NK cells | PSMA7     |
| 11497 | EBP       | 2.47E-149 | 0.505905 | 0.227 | 0.088 | 4.65E-145 | NK cells | EBP       |
| 11498 | ARAP2     | 2.78E-149 | 0.522807 | 0.219 | 0.082 | 5.22E-145 | NK cells | ARAP2     |
| 11499 | VPREB3.6  | 4.71E-149 | -1.25902 | 0.01  | 0.202 | 8.85E-145 | NK cells | VPREB3    |
| 11500 | MANF.3    | 5.70E-149 | 0.591873 | 0.307 | 0.141 | 1.07E-144 | NK cells | MANF      |
| 11501 | ITGAX.1   | 7.81E-149 | 0.458849 | 0.157 | 0.048 | 1.47E-144 | NK cells | ITGAX     |
| 11502 | SIT1.5    | 2.01E-148 | -0.74633 | 0.059 | 0.268 | 3.78E-144 | NK cells | SIT1      |
| 11503 | WIPF1.4   | 8.91E-148 | 0.666641 | 0.469 | 0.286 | 1.67E-143 | NK cells | WIPF1     |
| 11504 | NAALADL1  | 1.50E-147 | 0.42443  | 0.147 | 0.043 | 2.81E-143 | NK cells | NAALADL1  |
| 11505 | SUSD3.7   | 3.03E-147 | -0.7158  | 0.044 | 0.245 | 5.68E-143 | NK cells | SUSD3     |
| 11506 | IL32.7    | 1.37E-146 | 0.906592 | 0.679 | 0.56  | 2.57E-142 | NK cells | IL32      |
| 11507 | RALGDS    | 1.94E-146 | 0.368632 | 0.128 | 0.034 | 3.65E-142 | NK cells | RALGDS    |
| 11508 | COX6A1.3  | 1.21E-145 | 0.484804 | 0.827 | 0.765 | 2.27E-141 | NK cells | COX6A1    |
| 11509 | DIP2A.4   | 6.57E-144 | 0.641381 | 0.28  | 0.126 | 1.23E-139 | NK cells | DIP2A     |
| 11510 | CARD16.5  | 1.95E-143 | 0.596708 | 0.578 | 0.378 | 3.67E-139 | NK cells | CARD16    |
| 11511 | SYPL1.5   | 4.89E-143 | -0.76266 | 0.157 | 0.38  | 9.19E-139 | NK cells | SYPL1     |

|       |           |           |          |       |       |           |          |             |
|-------|-----------|-----------|----------|-------|-------|-----------|----------|-------------|
| 11512 | SELENOT.3 | 5.36E-143 | 0.645759 | 0.536 | 0.361 | 1.01E-138 | NK cells | SELENOT     |
| 11513 | MAPRE2.5  | 5.47E-143 | 0.619775 | 0.362 | 0.189 | 1.03E-138 | NK cells | MAPRE2      |
| 11514 | FCRLA.6   | 5.61E-143 | -1.01946 | 0.006 | 0.188 | 1.05E-138 | NK cells | FCRLA       |
| 11515 | RPL36A.6  | 7.78E-143 | -0.62431 | 0.666 | 0.814 | 1.46E-138 | NK cells | RPL36A      |
| 11516 | ILK.5     | 8.05E-143 | 0.602867 | 0.429 | 0.246 | 1.51E-138 | NK cells | ILK         |
| 11517 | ALOX5.5   | 1.31E-142 | -0.77055 | 0.007 | 0.189 | 2.46E-138 | NK cells | ALOX5       |
| 11518 | MRPL10.1  | 1.49E-142 | 0.57914  | 0.309 | 0.147 | 2.79E-138 | NK cells | MRPL10      |
| 11519 | RAB1B.2   | 2.54E-142 | 0.617178 | 0.444 | 0.262 | 4.78E-138 | NK cells | RAB1B       |
| 11520 | PSMA6.4   | 9.70E-142 | 0.623164 | 0.552 | 0.39  | 1.82E-137 | NK cells | PSMA6       |
| 11521 | FOXP1.4   | 1.23E-141 | -0.72432 | 0.22  | 0.45  | 2.30E-137 | NK cells | FOXP1       |
| 11522 | SLC25A6.3 | 1.80E-141 | -0.5134  | 0.644 | 0.808 | 3.39E-137 | NK cells | SLC25A6     |
| 11523 | STX8.1    | 3.33E-141 | 0.575846 | 0.322 | 0.157 | 6.25E-137 | NK cells | STX8        |
| 11524 | SEC61B.5  | 1.86E-140 | 0.556272 | 0.715 | 0.57  | 3.50E-136 | NK cells | SEC61B      |
| 11525 | RALGPS2.5 | 2.59E-139 | -0.98954 | 0.033 | 0.224 | 4.87E-135 | NK cells | RALGPS2     |
| 11526 | FAM129C.1 | 4.68E-139 | -1.00796 | 0.008 | 0.187 | 8.79E-135 | NK cells | FAM129C     |
| 11527 | TRAT1.5   | 7.95E-139 | -0.83314 | 0.053 | 0.247 | 1.49E-134 | NK cells | TRAT1       |
| 11528 | PVRIG     | 2.14E-138 | 0.420061 | 0.167 | 0.055 | 4.02E-134 | NK cells | PVRIG       |
| 11529 | PRELID1.5 | 9.47E-138 | 0.542413 | 0.664 | 0.5   | 1.78E-133 | NK cells | PRELID1     |
| 11530 | HLA-F.4   | 1.23E-137 | 0.64294  | 0.653 | 0.492 | 2.32E-133 | NK cells | HLA-F       |
| 11531 | IGF2R.1   | 7.03E-137 | 0.497817 | 0.18  | 0.064 | 1.32E-132 | NK cells | IGF2R       |
| 11532 | CORO1A.4  | 7.40E-137 | 0.451299 | 0.931 | 0.921 | 1.39E-132 | NK cells | CORO1A      |
| 11533 | TRAPPC1.3 | 8.36E-137 | 0.559207 | 0.721 | 0.601 | 1.57E-132 | NK cells | TRAPPC1     |
| 11534 | GCHFR.1   | 2.02E-136 | 0.580622 | 0.244 | 0.104 | 3.80E-132 | NK cells | GCHFR       |
| 11535 | MIR4435-2 | 2.39E-136 | 0.434893 | 0.176 | 0.061 | 4.49E-132 | NK cells | MIR4435-2HG |
| 11536 | WIP1.1.2  | 2.76E-136 | 0.354042 | 0.118 | 0.031 | 5.19E-132 | NK cells | WIP1        |
| 11537 | RPS6KA1.3 | 7.06E-136 | 0.60567  | 0.401 | 0.225 | 1.33E-131 | NK cells | RPS6KA1     |
| 11538 | RASSF4.1  | 7.81E-136 | 0.454495 | 0.138 | 0.041 | 1.47E-131 | NK cells | RASSF4      |
| 11539 | PREX1.1   | 2.65E-135 | 0.516465 | 0.22  | 0.088 | 4.98E-131 | NK cells | PREX1       |
| 11540 | USB1.1    | 3.67E-134 | 0.53684  | 0.262 | 0.117 | 6.89E-130 | NK cells | USB1        |
| 11541 | ID3.4     | 4.17E-134 | -0.8721  | 0.032 | 0.217 | 7.83E-130 | NK cells | ID3         |
| 11542 | NPC1      | 4.18E-134 | 0.327403 | 0.11  | 0.028 | 7.85E-130 | NK cells | NPC1        |
| 11543 | RCAN3.5   | 4.63E-134 | -0.68381 | 0.042 | 0.229 | 8.70E-130 | NK cells | RCAN3       |
| 11544 | TRPV2.1   | 1.38E-133 | 0.552853 | 0.307 | 0.15  | 2.59E-129 | NK cells | TRPV2       |
| 11545 | FCER2.6   | 1.52E-133 | -1.09237 | 0.005 | 0.177 | 2.86E-129 | NK cells | FCER2       |
| 11546 | CD164.1   | 4.34E-133 | 0.648682 | 0.566 | 0.395 | 8.16E-129 | NK cells | CD164       |
| 11547 | CFLAR.4   | 5.30E-133 | 0.643778 | 0.431 | 0.253 | 9.95E-129 | NK cells | CFLAR       |
| 11548 | DYNLL1.4  | 9.24E-133 | 0.650078 | 0.577 | 0.405 | 1.74E-128 | NK cells | DYNLL1      |
| 11549 | SUN2.4    | 1.30E-132 | 0.668206 | 0.45  | 0.274 | 2.45E-128 | NK cells | SUN2        |
| 11550 | DIAPH1.5  | 1.38E-132 | 0.538687 | 0.293 | 0.138 | 2.58E-128 | NK cells | DIAPH1      |
| 11551 | ACAA2     | 3.17E-132 | 0.51356  | 0.269 | 0.121 | 5.95E-128 | NK cells | ACAA2       |
| 11552 | CYBB.6    | 3.49E-132 | -0.83655 | 0.008 | 0.18  | 6.56E-128 | NK cells | CYBB        |
| 11553 | H2AFX.1   | 6.80E-132 | 0.376148 | 0.145 | 0.045 | 1.28E-127 | NK cells | H2AFX       |
| 11554 | ATP5MC3.1 | 1.52E-131 | 0.495892 | 0.766 | 0.672 | 2.86E-127 | NK cells | ATP5MC3     |
| 11555 | DHRS3     | 2.82E-131 | 0.401261 | 0.131 | 0.038 | 5.29E-127 | NK cells | DHRS3       |
| 11556 | SPI1.4    | 4.36E-131 | -0.94228 | 0.01  | 0.182 | 8.18E-127 | NK cells | SPI1        |
| 11557 | PIK3IP1.5 | 1.12E-130 | -0.72134 | 0.109 | 0.317 | 2.11E-126 | NK cells | PIK3IP1     |
| 11558 | PSMA5.3   | 1.59E-130 | 0.61312  | 0.555 | 0.399 | 2.99E-126 | NK cells | PSMA5       |

|       |           |           |          |       |       |           |          |           |
|-------|-----------|-----------|----------|-------|-------|-----------|----------|-----------|
| 11559 | ARHGDI2   | 7.62E-130 | 0.605509 | 0.613 | 0.47  | 1.43E-125 | NK cells | ARHGDI2   |
| 11560 | NAPSA     | 9.32E-130 | -0.78619 | 0.01  | 0.18  | 1.75E-125 | NK cells | NAPSA     |
| 11561 | PSTPIP1   | 1.13E-129 | 0.571186 | 0.358 | 0.189 | 2.12E-125 | NK cells | PSTPIP1   |
| 11562 | STK10     | 1.27E-129 | 0.618061 | 0.372 | 0.204 | 2.38E-125 | NK cells | STK10     |
| 11563 | PTPN7     | 3.58E-129 | 0.44544  | 0.223 | 0.09  | 6.73E-125 | NK cells | PTPN7     |
| 11564 | ARMH1     | 8.29E-129 | -0.67888 | 0.027 | 0.204 | 1.56E-124 | NK cells | ARMH1     |
| 11565 | CYB561D2  | 9.43E-129 | 0.556839 | 0.349 | 0.183 | 1.77E-124 | NK cells | CYB561D2  |
| 11566 | PTGER4    | 2.03E-128 | 0.491916 | 0.194 | 0.074 | 3.81E-124 | NK cells | PTGER4    |
| 11567 | RPS11     | 2.76E-127 | -0.48855 | 0.661 | 0.825 | 5.19E-123 | NK cells | RPS11     |
| 11568 | FERMT3    | 5.57E-127 | 0.578145 | 0.533 | 0.36  | 1.05E-122 | NK cells | FERMT3    |
| 11569 | TMEM123   | 5.78E-127 | -0.63519 | 0.256 | 0.476 | 1.09E-122 | NK cells | TMEM123   |
| 11570 | UTRN      | 8.16E-127 | 0.62248  | 0.349 | 0.185 | 1.53E-122 | NK cells | UTRN      |
| 11571 | SUMO2     | 9.16E-127 | 0.39786  | 0.882 | 0.843 | 1.72E-122 | NK cells | SUMO2     |
| 11572 | GCA       | 1.01E-126 | -0.92175 | 0.035 | 0.215 | 1.90E-122 | NK cells | GCA       |
| 11573 | DGKA      | 1.77E-126 | -0.68802 | 0.13  | 0.334 | 3.33E-122 | NK cells | DGKA      |
| 11574 | CAPN12    | 2.86E-126 | 0.369298 | 0.116 | 0.032 | 5.37E-122 | NK cells | CAPN12    |
| 11575 | HNRNPA2B1 | 3.75E-125 | 0.438104 | 0.901 | 0.881 | 7.04E-121 | NK cells | HNRNPA2B1 |
| 11576 | CD5       | 5.76E-125 | -0.69085 | 0.063 | 0.246 | 1.08E-120 | NK cells | CD5       |
| 11577 | SRP14     | 1.50E-124 | 0.381887 | 0.903 | 0.879 | 2.82E-120 | NK cells | SRP14     |
| 11578 | RHOF      | 1.52E-124 | 0.586922 | 0.475 | 0.302 | 2.86E-120 | NK cells | RHOF      |
| 11579 | LMO4      | 1.69E-124 | 0.517998 | 0.228 | 0.098 | 3.17E-120 | NK cells | LMO4      |
| 11580 | HMOX2     | 3.01E-124 | 0.579104 | 0.553 | 0.383 | 5.66E-120 | NK cells | HMOX2     |
| 11581 | PPIA      | 3.41E-124 | 0.390246 | 0.967 | 0.948 | 6.41E-120 | NK cells | PPIA      |
| 11582 | LAT2      | 7.66E-124 | 0.548136 | 0.381 | 0.204 | 1.44E-119 | NK cells | LAT2      |
| 11583 | BTK       | 2.31E-123 | -0.61783 | 0.007 | 0.168 | 4.35E-119 | NK cells | BTK       |
| 11584 | AQP3      | 3.12E-123 | -0.69053 | 0.059 | 0.247 | 5.87E-119 | NK cells | AQP3      |
| 11585 | BACH2     | 1.59E-122 | -0.75364 | 0.039 | 0.213 | 2.98E-118 | NK cells | BACH2     |
| 11586 | TBC1D31   | 1.71E-122 | 0.317552 | 0.106 | 0.028 | 3.22E-118 | NK cells | TBC1D31   |
| 11587 | APOBEC3C  | 2.29E-122 | 0.503807 | 0.26  | 0.118 | 4.30E-118 | NK cells | APOBEC3C  |
| 11588 | ASL       | 3.74E-122 | 0.406053 | 0.166 | 0.059 | 7.02E-118 | NK cells | ASL       |
| 11589 | RHOH      | 8.08E-122 | -0.6473  | 0.263 | 0.473 | 1.52E-117 | NK cells | RHOH      |
| 11590 | FCGRT     | 1.28E-121 | -0.74436 | 0.045 | 0.221 | 2.41E-117 | NK cells | FCGRT     |
| 11591 | MEF2C     | 2.90E-121 | -0.88562 | 0.046 | 0.224 | 5.45E-117 | NK cells | MEF2C     |
| 11592 | GABARAPL1 | 3.32E-121 | 0.344981 | 0.115 | 0.032 | 6.24E-117 | NK cells | GABARAPL1 |
| 11593 | KEAP1     | 6.05E-121 | 0.435163 | 0.216 | 0.09  | 1.14E-116 | NK cells | KEAP1     |
| 11594 | SNX2      | 4.01E-120 | -0.84197 | 0.24  | 0.436 | 7.52E-116 | NK cells | SNX2      |
| 11595 | LY86      | 9.97E-120 | -0.65797 | 0.011 | 0.172 | 1.87E-115 | NK cells | LY86      |
| 11596 | BZW1      | 1.02E-119 | 0.600025 | 0.518 | 0.355 | 1.91E-115 | NK cells | BZW1      |
| 11597 | SERPINB6  | 1.51E-119 | 0.54819  | 0.253 | 0.118 | 2.84E-115 | NK cells | SERPINB6  |
| 11598 | SH3BP1    | 3.81E-119 | 0.547185 | 0.338 | 0.181 | 7.16E-115 | NK cells | SH3BP1    |
| 11599 | TMBIM6    | 2.66E-118 | 0.504279 | 0.766 | 0.689 | 5.00E-114 | NK cells | TMBIM6    |
| 11600 | PIP4K2A   | 1.19E-117 | 0.446039 | 0.157 | 0.055 | 2.23E-113 | NK cells | PIP4K2A   |
| 11601 | TCIRG1    | 1.89E-117 | 0.529055 | 0.417 | 0.242 | 3.55E-113 | NK cells | TCIRG1    |
| 11602 | NDUFS8    | 4.97E-117 | 0.571196 | 0.543 | 0.389 | 9.33E-113 | NK cells | NDUFS8    |
| 11603 | HLA-DQA2  | 5.54E-117 | -1.64591 | 0.056 | 0.226 | 1.04E-112 | NK cells | HLA-DQA2  |
| 11604 | TRABD2A   | 6.09E-117 | -0.6418  | 0.028 | 0.192 | 1.14E-112 | NK cells | TRABD2A   |
| 11605 | HLA-DMB   | 1.50E-116 | -0.78927 | 0.04  | 0.21  | 2.82E-112 | NK cells | HLA-DMB   |



|       |            |           |          |       |       |           |          |           |
|-------|------------|-----------|----------|-------|-------|-----------|----------|-----------|
| 11606 | TMX4.2     | 2.82E-116 | 0.527188 | 0.3   | 0.151 | 5.29E-112 | NK cells | TMX4      |
| 11607 | BATF.1     | 3.25E-115 | 0.474576 | 0.266 | 0.125 | 6.10E-111 | NK cells | BATF      |
| 11608 | MAD2L2.1   | 2.22E-114 | 0.526674 | 0.301 | 0.154 | 4.17E-110 | NK cells | MAD2L2    |
| 11609 | POLR2G.2   | 3.08E-114 | 0.571521 | 0.455 | 0.292 | 5.79E-110 | NK cells | POLR2G    |
| 11610 | IL10RA.6   | 5.90E-114 | 0.562025 | 0.414 | 0.247 | 1.11E-109 | NK cells | IL10RA    |
| 11611 | LAMP1.2    | 2.12E-113 | 0.58459  | 0.486 | 0.325 | 3.99E-109 | NK cells | LAMP1     |
| 11612 | IVNS1ABP.  | 2.30E-113 | 0.604429 | 0.307 | 0.161 | 4.31E-109 | NK cells | IVNS1ABP  |
| 11613 | CCDC107.4  | 2.59E-113 | 0.594571 | 0.433 | 0.269 | 4.87E-109 | NK cells | CCDC107   |
| 11614 | SYTL2      | 8.26E-113 | 0.316777 | 0.102 | 0.028 | 1.55E-108 | NK cells | SYTL2     |
| 11615 | NDUFA6.5   | 1.12E-112 | 0.569818 | 0.533 | 0.385 | 2.09E-108 | NK cells | NDUFA6    |
| 11616 | ERP29.2    | 1.98E-112 | -0.48269 | 0.545 | 0.733 | 3.73E-108 | NK cells | ERP29     |
| 11617 | PPP1R12A.  | 2.48E-112 | 0.568366 | 0.444 | 0.28  | 4.66E-108 | NK cells | PPP1R12A  |
| 11618 | ZBP1.2     | 2.54E-112 | 0.423612 | 0.169 | 0.064 | 4.77E-108 | NK cells | ZBP1      |
| 11619 | PGAM1.5    | 3.25E-112 | 0.531975 | 0.619 | 0.489 | 6.10E-108 | NK cells | PGAM1     |
| 11620 | PSMB6.3    | 4.80E-112 | 0.509955 | 0.597 | 0.456 | 9.02E-108 | NK cells | PSMB6     |
| 11621 | TBK1       | 5.61E-112 | 0.3721   | 0.172 | 0.065 | 1.05E-107 | NK cells | TBK1      |
| 11622 | HVCN1.6    | 8.06E-112 | -1.03731 | 0.117 | 0.296 | 1.51E-107 | NK cells | HVCN1     |
| 11623 | ARHGAP9.   | 1.65E-110 | 0.60744  | 0.51  | 0.351 | 3.09E-106 | NK cells | ARHGAP9   |
| 11624 | ARFGAP3.3  | 2.10E-110 | 0.502328 | 0.282 | 0.142 | 3.94E-106 | NK cells | ARFGAP3   |
| 11625 | DCTN3.4    | 2.52E-110 | 0.550993 | 0.506 | 0.356 | 4.74E-106 | NK cells | DCTN3     |
| 11626 | CYB5B.2    | 2.81E-110 | 0.508842 | 0.298 | 0.153 | 5.27E-106 | NK cells | CYB5B     |
| 11627 | TADA3.2    | 7.58E-110 | 0.544389 | 0.418 | 0.258 | 1.42E-105 | NK cells | TADA3     |
| 11628 | HNRNPF.4   | 2.69E-109 | 0.487629 | 0.755 | 0.689 | 5.05E-105 | NK cells | HNRNPF    |
| 11629 | SCLT1.1    | 3.15E-109 | 0.409302 | 0.166 | 0.063 | 5.92E-105 | NK cells | SCLT1     |
| 11630 | ANXA4.3    | 9.94E-109 | 0.450134 | 0.289 | 0.143 | 1.87E-104 | NK cells | ANXA4     |
| 11631 | CDC42.4    | 1.15E-108 | 0.511949 | 0.752 | 0.65  | 2.16E-104 | NK cells | CDC42     |
| 11632 | CDC42SE1.  | 1.25E-108 | 0.575393 | 0.567 | 0.41  | 2.35E-104 | NK cells | CDC42SE1  |
| 11633 | BTN3A2.5   | 1.83E-108 | 0.583558 | 0.402 | 0.243 | 3.44E-104 | NK cells | BTN3A2    |
| 11634 | DERL1.2    | 3.08E-108 | 0.526301 | 0.318 | 0.171 | 5.79E-104 | NK cells | DERL1     |
| 11635 | UBE2L6.2   | 6.69E-108 | 0.526755 | 0.595 | 0.45  | 1.26E-103 | NK cells | UBE2L6    |
| 11636 | RFTN1      | 9.06E-108 | 0.483692 | 0.247 | 0.116 | 1.70E-103 | NK cells | RFTN1     |
| 11637 | MACF1.3    | 1.22E-107 | 0.550048 | 0.319 | 0.172 | 2.28E-103 | NK cells | MACF1     |
| 11638 | KLHDC4     | 1.34E-107 | 0.441392 | 0.207 | 0.089 | 2.51E-103 | NK cells | KLHDC4    |
| 11639 | PSMD8.2    | 1.43E-107 | 0.546136 | 0.554 | 0.421 | 2.69E-103 | NK cells | PSMD8     |
| 11640 | CD69.3     | 2.28E-107 | 0.562878 | 0.397 | 0.231 | 4.28E-103 | NK cells | CD69      |
| 11641 | POMP.4     | 2.94E-107 | 0.532346 | 0.592 | 0.454 | 5.51E-103 | NK cells | POMP      |
| 11642 | MMP25-AS.  | 3.64E-107 | 0.403375 | 0.147 | 0.052 | 6.83E-103 | NK cells | MMP25-AS1 |
| 11643 | KCTD10     | 6.70E-107 | 0.315532 | 0.119 | 0.037 | 1.26E-102 | NK cells | KCTD10    |
| 11644 | CTSH.6     | 1.77E-106 | -0.57864 | 0.017 | 0.166 | 3.33E-102 | NK cells | CTSH      |
| 11645 | NCF4.5     | 3.44E-106 | -0.64522 | 0.023 | 0.172 | 6.46E-102 | NK cells | NCF4      |
| 11646 | LASP1.2    | 1.22E-105 | 0.506669 | 0.284 | 0.145 | 2.30E-101 | NK cells | LASP1     |
| 11647 | CD79B.6    | 1.43E-105 | -1.2011  | 0.15  | 0.321 | 2.69E-101 | NK cells | CD79B     |
| 11648 | TMEM59.3   | 2.33E-105 | 0.531065 | 0.674 | 0.549 | 4.39E-101 | NK cells | TMEM59    |
| 11649 | BLK.6      | 2.51E-105 | -0.67175 | 0.006 | 0.147 | 4.72E-101 | NK cells | BLK       |
| 11650 | C11orf21.1 | 2.99E-105 | 0.51288  | 0.242 | 0.116 | 5.62E-101 | NK cells | C11orf21  |
| 11651 | PSMB2.3    | 3.54E-105 | 0.558179 | 0.468 | 0.321 | 6.64E-101 | NK cells | PSMB2     |
| 11652 | TMEM243.   | 4.93E-105 | -0.573   | 0.217 | 0.413 | 9.25E-101 | NK cells | TMEM243   |

|       |            |           |          |       |       |           |          |          |
|-------|------------|-----------|----------|-------|-------|-----------|----------|----------|
| 11653 | AKNA.3     | 5.25E-105 | 0.588082 | 0.369 | 0.217 | 9.87E-101 | NK cells | AKNA     |
| 11654 | CD320.2    | 1.90E-104 | 0.52268  | 0.254 | 0.124 | 3.56E-100 | NK cells | CD320    |
| 11655 | RAB8B.2    | 2.54E-104 | 0.515151 | 0.259 | 0.127 | 4.77E-100 | NK cells | RAB8B    |
| 11656 | JAML.5     | 6.64E-104 | -0.61988 | 0.032 | 0.184 | 1.25E-99  | NK cells | JAML     |
| 11657 | COX5A.6    | 3.83E-103 | 0.480291 | 0.66  | 0.553 | 7.20E-99  | NK cells | COX5A    |
| 11658 | NRROS.4    | 4.62E-103 | 0.486293 | 0.224 | 0.104 | 8.67E-99  | NK cells | NRROS    |
| 11659 | RSL1D1.4   | 5.31E-103 | -0.51851 | 0.371 | 0.568 | 9.98E-99  | NK cells | RSL1D1   |
| 11660 | SELENOK.2  | 5.57E-103 | 0.532297 | 0.453 | 0.295 | 1.05E-98  | NK cells | SELENOK  |
| 11661 | HCK.4      | 5.71E-103 | -0.73091 | 0.006 | 0.144 | 1.07E-98  | NK cells | HCK      |
| 11662 | TES.3      | 2.53E-102 | 0.581172 | 0.424 | 0.271 | 4.74E-98  | NK cells | TES      |
| 11663 | BTG1.5     | 2.84E-102 | -0.49545 | 0.79  | 0.888 | 5.33E-98  | NK cells | BTG1     |
| 11664 | BANF1.1    | 3.47E-102 | 0.544193 | 0.6   | 0.475 | 6.51E-98  | NK cells | BANF1    |
| 11665 | BPGM.1     | 6.39E-102 | 0.357572 | 0.134 | 0.046 | 1.20E-97  | NK cells | BPGM     |
| 11666 | TMA7.4     | 1.59E-101 | 0.363551 | 0.952 | 0.925 | 2.98E-97  | NK cells | TMA7     |
| 11667 | PILRB      | 2.34E-101 | 0.391122 | 0.16  | 0.062 | 4.40E-97  | NK cells | PILRB    |
| 11668 | TMED10.3   | 3.47E-101 | 0.580108 | 0.471 | 0.319 | 6.53E-97  | NK cells | TMED10   |
| 11669 | SLFN12L    | 8.43E-101 | 0.314814 | 0.117 | 0.037 | 1.58E-96  | NK cells | SLFN12L  |
| 11670 | CXCR4.6    | 2.10E-100 | -0.69048 | 0.153 | 0.339 | 3.95E-96  | NK cells | CXCR4    |
| 11671 | RPL31.5    | 8.46E-100 | -0.38114 | 0.794 | 0.883 | 1.59E-95  | NK cells | RPL31    |
| 11672 | CD8B.5     | 1.72E-99  | -1.29291 | 0.058 | 0.214 | 3.23E-95  | NK cells | CD8B     |
| 11673 | SNHG7.5    | 2.98E-99  | -0.64206 | 0.111 | 0.283 | 5.59E-95  | NK cells | SNHG7    |
| 11674 | LST1.7     | 5.79E-99  | -1.56966 | 0.033 | 0.18  | 1.09E-94  | NK cells | LST1     |
| 11675 | SNRPB.1    | 1.28E-98  | 0.565375 | 0.557 | 0.439 | 2.41E-94  | NK cells | SNRPB    |
| 11676 | ELOVL1.3   | 2.64E-98  | 0.491569 | 0.327 | 0.184 | 4.96E-94  | NK cells | ELOVL1   |
| 11677 | SEPT11.2   | 2.70E-98  | 0.337464 | 0.156 | 0.06  | 5.07E-94  | NK cells | Sep-11   |
| 11678 | CXCR3      | 2.70E-98  | 0.398817 | 0.172 | 0.069 | 5.07E-94  | NK cells | CXCR3    |
| 11679 | WDR83OS.   | 2.74E-98  | 0.473576 | 0.705 | 0.591 | 5.14E-94  | NK cells | WDR83OS  |
| 11680 | SPPL2A.1   | 3.47E-98  | 0.486138 | 0.264 | 0.135 | 6.51E-94  | NK cells | SPPL2A   |
| 11681 | NLRC3.1    | 2.21E-97  | 0.405773 | 0.192 | 0.083 | 4.15E-93  | NK cells | NLRC3    |
| 11682 | MT2A.4     | 6.61E-97  | 0.636807 | 0.501 | 0.347 | 1.24E-92  | NK cells | MT2A     |
| 11683 | RNF166.4   | 1.01E-96  | 0.53038  | 0.306 | 0.17  | 1.90E-92  | NK cells | RNF166   |
| 11684 | RNF167.4   | 1.03E-96  | 0.561011 | 0.495 | 0.347 | 1.94E-92  | NK cells | RNF167   |
| 11685 | FNDC3B.2   | 1.37E-96  | 0.387804 | 0.129 | 0.045 | 2.57E-92  | NK cells | FNDC3B   |
| 11686 | RUBCNL.3   | 1.76E-96  | -0.60868 | 0.007 | 0.138 | 3.31E-92  | NK cells | RUBCNL   |
| 11687 | RPS10.4    | 1.89E-96  | -0.54878 | 0.516 | 0.68  | 3.56E-92  | NK cells | RPS10    |
| 11688 | CD40.6     | 4.01E-96  | -0.6662  | 0.023 | 0.164 | 7.54E-92  | NK cells | CD40     |
| 11689 | C12orf57.5 | 4.23E-96  | -0.513   | 0.638 | 0.766 | 7.94E-92  | NK cells | C12orf57 |
| 11690 | TMCO1.1    | 7.24E-96  | 0.530507 | 0.398 | 0.25  | 1.36E-91  | NK cells | TMCO1    |
| 11691 | BCAP31.2   | 1.15E-95  | 0.492148 | 0.648 | 0.528 | 2.16E-91  | NK cells | BCAP31   |
| 11692 | CD82.5     | 1.51E-95  | -0.64169 | 0.05  | 0.197 | 2.84E-91  | NK cells | CD82     |
| 11693 | CNN2.4     | 1.63E-95  | -0.42002 | 0.483 | 0.696 | 3.07E-91  | NK cells | CNN2     |
| 11694 | IMPDH2.5   | 3.20E-95  | -0.52271 | 0.209 | 0.398 | 6.00E-91  | NK cells | IMPDH2   |
| 11695 | SETD3.1    | 9.07E-95  | 0.465407 | 0.229 | 0.11  | 1.70E-90  | NK cells | SETD3    |
| 11696 | IGHD.4     | 9.87E-95  | -0.76513 | 0.008 | 0.138 | 1.85E-90  | NK cells | IGHD     |
| 11697 | STMN3.4    | 1.47E-94  | -0.54492 | 0.052 | 0.202 | 2.75E-90  | NK cells | STMN3    |
| 11698 | DNPH1.2    | 5.12E-94  | -0.51528 | 0.105 | 0.269 | 9.63E-90  | NK cells | DNPH1    |
| 11699 | CARHSP1    | 5.64E-94  | 0.517362 | 0.316 | 0.18  | 1.06E-89  | NK cells | CARHSP1  |

|       |           |          |          |       |       |                   |         |
|-------|-----------|----------|----------|-------|-------|-------------------|---------|
| 11700 | ISG15.3   | 6.48E-94 | 0.51547  | 0.435 | 0.284 | 1.22E-89 NK cells | ISG15   |
| 11701 | ARNTL     | 6.91E-94 | 0.35316  | 0.137 | 0.05  | 1.30E-89 NK cells | ARNTL   |
| 11702 | PIGT.1    | 1.61E-93 | 0.469665 | 0.272 | 0.144 | 3.02E-89 NK cells | PIGT    |
| 11703 | NABP2     | 1.75E-93 | 0.361916 | 0.198 | 0.088 | 3.28E-89 NK cells | NABP2   |
| 11704 | IL2RG.2   | 2.21E-93 | 0.565354 | 0.26  | 0.133 | 4.15E-89 NK cells | IL2RG   |
| 11705 | CANX.4    | 3.85E-93 | 0.545273 | 0.435 | 0.288 | 7.23E-89 NK cells | CANX    |
| 11706 | BLNK.4    | 4.18E-93 | -0.54923 | 0.003 | 0.127 | 7.85E-89 NK cells | BLNK    |
| 11707 | HDDC2.2   | 4.62E-93 | 0.52099  | 0.379 | 0.235 | 8.68E-89 NK cells | HDDC2   |
| 11708 | SACM1L    | 5.00E-93 | 0.465539 | 0.214 | 0.101 | 9.40E-89 NK cells | SACM1L  |
| 11709 | HINT1.4   | 5.16E-93 | -0.35563 | 0.833 | 0.92  | 9.70E-89 NK cells | HINT1   |
| 11710 | HLA-DOB.4 | 6.55E-93 | -0.61951 | 0.006 | 0.132 | 1.23E-88 NK cells | HLA-DOB |
| 11711 | BEX3.6    | 8.66E-93 | -0.57616 | 0.046 | 0.192 | 1.63E-88 NK cells | BEX3    |
| 11712 | TESC.3    | 1.36E-92 | 0.426563 | 0.192 | 0.085 | 2.56E-88 NK cells | TESC    |
| 11713 | RASAL3.5  | 1.53E-92 | 0.546567 | 0.396 | 0.251 | 2.86E-88 NK cells | RASAL3  |
| 11714 | OXNAD1.5  | 2.60E-92 | -0.60647 | 0.096 | 0.257 | 4.88E-88 NK cells | OXNAD1  |
| 11715 | SEC61G.6  | 3.22E-92 | 0.531629 | 0.627 | 0.506 | 6.05E-88 NK cells | SEC61G  |
| 11716 | DNAJB11.1 | 3.58E-92 | 0.433517 | 0.26  | 0.133 | 6.72E-88 NK cells | DNAJB11 |
| 11717 | ATP1B3.3  | 4.04E-92 | 0.486676 | 0.276 | 0.148 | 7.59E-88 NK cells | ATP1B3  |
| 11718 | ZBTB38.2  | 4.17E-92 | 0.426844 | 0.214 | 0.101 | 7.84E-88 NK cells | ZBTB38  |
| 11719 | SIRT2.1   | 1.02E-91 | 0.450236 | 0.244 | 0.123 | 1.91E-87 NK cells | SIRT2   |
| 11720 | CBLB.4    | 1.11E-91 | 0.464962 | 0.267 | 0.138 | 2.08E-87 NK cells | CBLB    |
| 11721 | UQCR11.3  | 1.31E-91 | 0.434321 | 0.821 | 0.742 | 2.46E-87 NK cells | UQCR11  |
| 11722 | EIF3L.4   | 2.33E-91 | -0.44552 | 0.534 | 0.704 | 4.39E-87 NK cells | EIF3L   |
| 11723 | CD24.5    | 2.57E-91 | -0.6737  | 0.004 | 0.126 | 4.83E-87 NK cells | CD24    |
| 11724 | ARF5.4    | 4.09E-91 | 0.445227 | 0.654 | 0.534 | 7.68E-87 NK cells | ARF5    |
| 11725 | CD4.4     | 4.95E-91 | -0.51483 | 0.027 | 0.162 | 9.30E-87 NK cells | CD4     |
| 11726 | RPL38.5   | 5.87E-91 | -0.43052 | 0.703 | 0.823 | 1.10E-86 NK cells | RPL38   |
| 11727 | VDAC3.4   | 5.98E-91 | 0.499007 | 0.439 | 0.299 | 1.12E-86 NK cells | VDAC3   |
| 11728 | EAf2.4    | 8.37E-91 | -0.61371 | 0.034 | 0.172 | 1.57E-86 NK cells | EAf2    |
| 11729 | SMDT1.4   | 8.85E-91 | -0.43966 | 0.518 | 0.693 | 1.66E-86 NK cells | SMDT1   |
| 11730 | FCRL1.4   | 1.06E-90 | -0.59918 | 0.003 | 0.125 | 1.99E-86 NK cells | FCRL1   |
| 11731 | EIF3G.4   | 1.11E-90 | 0.489272 | 0.815 | 0.761 | 2.09E-86 NK cells | EIF3G   |
| 11732 | GNG5.3    | 1.15E-90 | 0.387851 | 0.736 | 0.627 | 2.15E-86 NK cells | GNG5    |
| 11733 | SOCS3.4   | 1.22E-90 | -0.58056 | 0.031 | 0.169 | 2.29E-86 NK cells | SOCS3   |
| 11734 | RBM8A.1   | 1.42E-90 | 0.51403  | 0.563 | 0.442 | 2.67E-86 NK cells | RBM8A   |
| 11735 | SAR1A.2   | 1.74E-90 | 0.449828 | 0.217 | 0.104 | 3.26E-86 NK cells | SAR1A   |
| 11736 | HIVEP3    | 1.97E-90 | 0.25166  | 0.102 | 0.032 | 3.70E-86 NK cells | HIVEP3  |
| 11737 | ANAPC11.3 | 2.11E-90 | 0.51165  | 0.548 | 0.422 | 3.97E-86 NK cells | ANAPC11 |
| 11738 | FLT3LG.5  | 2.86E-90 | -0.63748 | 0.23  | 0.401 | 5.37E-86 NK cells | FLT3LG  |
| 11739 | CREM      | 3.25E-90 | 0.43983  | 0.152 | 0.061 | 6.10E-86 NK cells | CREM    |
| 11740 | PTMS.1    | 5.22E-90 | 0.312823 | 0.102 | 0.032 | 9.81E-86 NK cells | PTMS    |
| 11741 | TGFBR1    | 6.03E-90 | 0.324192 | 0.106 | 0.034 | 1.13E-85 NK cells | TGFBR1  |
| 11742 | RGCC.5    | 2.26E-89 | -0.58495 | 0.069 | 0.219 | 4.24E-85 NK cells | RGCC    |
| 11743 | MARCH1.4  | 3.02E-89 | -0.49175 | 0.007 | 0.13  | 5.67E-85 NK cells | Mar-01  |
| 11744 | PDE4B.4   | 3.34E-89 | -0.53669 | 0.039 | 0.178 | 6.27E-85 NK cells | PDE4B   |
| 11745 | GCLM.1    | 1.11E-88 | 0.351783 | 0.146 | 0.057 | 2.08E-84 NK cells | GCLM    |
| 11746 | EIF2S3.2  | 1.15E-88 | -0.47596 | 0.28  | 0.468 | 2.16E-84 NK cells | EIF2S3  |

|       |            |          |          |       |       |          |          |            |
|-------|------------|----------|----------|-------|-------|----------|----------|------------|
| 11747 | RPN2.3     | 1.27E-88 | 0.495499 | 0.544 | 0.412 | 2.38E-84 | NK cells | RPN2       |
| 11748 | PHPT1.5    | 1.30E-88 | 0.532966 | 0.397 | 0.255 | 2.45E-84 | NK cells | PHPT1      |
| 11749 | SERPINB1.1 | 1.40E-88 | 0.432065 | 0.582 | 0.437 | 2.63E-84 | NK cells | SERPINB1   |
| 11750 | IGKC.3     | 1.53E-88 | -2.00454 | 0.035 | 0.17  | 2.88E-84 | NK cells | IGKC       |
| 11751 | CD55.4     | 1.73E-88 | -0.61314 | 0.251 | 0.429 | 3.25E-84 | NK cells | CD55       |
| 11752 | KCNAB2.3   | 2.71E-88 | 0.476396 | 0.309 | 0.176 | 5.09E-84 | NK cells | KCNAB2     |
| 11753 | CCND2.3    | 3.31E-88 | 0.525358 | 0.256 | 0.134 | 6.22E-84 | NK cells | CCND2      |
| 11754 | CALHM6.6   | 4.62E-88 | -0.70343 | 0.083 | 0.234 | 8.68E-84 | NK cells | CALHM6     |
| 11755 | FKBP2.2    | 6.15E-88 | 0.576483 | 0.424 | 0.281 | 1.16E-83 | NK cells | FKBP2      |
| 11756 | SELENOS.4  | 6.63E-88 | 0.494194 | 0.3   | 0.168 | 1.25E-83 | NK cells | SELENOS    |
| 11757 | SEC11A.4   | 6.87E-88 | 0.476055 | 0.563 | 0.422 | 1.29E-83 | NK cells | SEC11A     |
| 11758 | JAZF1.3    | 1.26E-87 | 0.382664 | 0.191 | 0.085 | 2.37E-83 | NK cells | JAZF1      |
| 11759 | POLR3GL.4  | 2.35E-87 | 0.523725 | 0.408 | 0.266 | 4.42E-83 | NK cells | POLR3GL    |
| 11760 | VIM.6      | 2.41E-87 | -0.4855  | 0.686 | 0.822 | 4.53E-83 | NK cells | VIM        |
| 11761 | TMEM154.4  | 6.59E-87 | -0.50667 | 0.032 | 0.165 | 1.24E-82 | NK cells | TMEM154    |
| 11762 | TLE1       | 7.91E-87 | 0.331042 | 0.106 | 0.035 | 1.49E-82 | NK cells | TLE1       |
| 11763 | IGHV5-78.3 | 8.14E-87 | -0.64456 | 0.007 | 0.127 | 1.53E-82 | NK cells | IGHV5-78   |
| 11764 | RAP2B.1    | 1.03E-86 | 0.390297 | 0.19  | 0.086 | 1.93E-82 | NK cells | RAP2B      |
| 11765 | YARS       | 1.28E-86 | 0.436846 | 0.247 | 0.127 | 2.40E-82 | NK cells | YARS       |
| 11766 | TUBB4B.3   | 1.60E-86 | 0.619287 | 0.322 | 0.194 | 3.00E-82 | NK cells | TUBB4B     |
| 11767 | S100A9.4   | 1.80E-86 | -3.96239 | 0.086 | 0.234 | 3.38E-82 | NK cells | S100A9     |
| 11768 | TRABD.4    | 2.66E-86 | 0.494939 | 0.5   | 0.358 | 5.00E-82 | NK cells | TRABD      |
| 11769 | ALKBH7.4   | 5.54E-86 | -0.47579 | 0.29  | 0.472 | 1.04E-81 | NK cells | ALKBH7     |
| 11770 | SWAP70.4   | 6.61E-86 | -0.61315 | 0.043 | 0.179 | 1.24E-81 | NK cells | SWAP70     |
| 11771 | SH3GLB1.2  | 1.27E-85 | 0.495199 | 0.367 | 0.229 | 2.38E-81 | NK cells | SH3GLB1    |
| 11772 | AC245297.3 | 1.74E-85 | 0.367604 | 0.136 | 0.052 | 3.27E-81 | NK cells | AC245297.3 |
| 11773 | SUB1.2     | 1.88E-85 | 0.348934 | 0.82  | 0.767 | 3.54E-81 | NK cells | SUB1       |
| 11774 | ITM2C.4    | 2.01E-85 | -0.60217 | 0.03  | 0.16  | 3.77E-81 | NK cells | ITM2C      |
| 11775 | DNAJB6.4   | 2.27E-85 | 0.527017 | 0.412 | 0.275 | 4.26E-81 | NK cells | DNAJB6     |
| 11776 | CDC42EP3.3 | 2.35E-85 | 0.435871 | 0.303 | 0.171 | 4.41E-81 | NK cells | CDC42EP3   |
| 11777 | PTPRE.5    | 2.71E-85 | 0.402124 | 0.245 | 0.125 | 5.08E-81 | NK cells | PTPRE      |
| 11778 | PGM1       | 3.07E-85 | 0.388049 | 0.229 | 0.114 | 5.77E-81 | NK cells | PGM1       |
| 11779 | ARL6IP5.4  | 3.25E-85 | 0.438695 | 0.737 | 0.638 | 6.10E-81 | NK cells | ARL6IP5    |
| 11780 | TMED2.2    | 3.26E-85 | 0.509743 | 0.457 | 0.317 | 6.12E-81 | NK cells | TMED2      |
| 11781 | RASSF5.4   | 4.42E-85 | 0.499563 | 0.437 | 0.297 | 8.30E-81 | NK cells | RASSF5     |
| 11782 | KDELR2.2   | 6.66E-85 | 0.484479 | 0.391 | 0.248 | 1.25E-80 | NK cells | KDELR2     |
| 11783 | ABHD2.1    | 1.36E-84 | 0.329763 | 0.134 | 0.051 | 2.56E-80 | NK cells | ABHD2      |
| 11784 | LRRN3.5    | 1.38E-84 | -0.56288 | 0.013 | 0.133 | 2.60E-80 | NK cells | LRRN3      |
| 11785 | SRSF3.2    | 1.84E-84 | 0.504305 | 0.599 | 0.498 | 3.45E-80 | NK cells | SRSF3      |
| 11786 | CEBPD.1    | 1.92E-84 | 0.446222 | 0.151 | 0.061 | 3.61E-80 | NK cells | CEBPD      |
| 11787 | AP2A1.1    | 2.30E-84 | 0.429452 | 0.253 | 0.133 | 4.31E-80 | NK cells | AP2A1      |
| 11788 | KRTCAP2.3  | 3.57E-84 | 0.439992 | 0.695 | 0.594 | 6.71E-80 | NK cells | KRTCAP2    |
| 11789 | PSMB1.3    | 4.18E-84 | 0.457392 | 0.64  | 0.552 | 7.86E-80 | NK cells | PSMB1      |
| 11790 | S100A8.5   | 4.23E-84 | -4.33621 | 0.099 | 0.25  | 7.95E-80 | NK cells | S100A8     |
| 11791 | UCHL5.1    | 5.15E-84 | 0.449222 | 0.258 | 0.137 | 9.68E-80 | NK cells | UCHL5      |
| 11792 | C1orf174   | 6.58E-84 | 0.399564 | 0.233 | 0.117 | 1.24E-79 | NK cells | C1orf174   |
| 11793 | PPP5C.1    | 6.71E-84 | 0.424363 | 0.247 | 0.128 | 1.26E-79 | NK cells | PPP5C      |

|       |            |          |          |       |       |          |          |          |
|-------|------------|----------|----------|-------|-------|----------|----------|----------|
| 11794 | MRPS6.2    | 7.73E-84 | 0.537025 | 0.489 | 0.36  | 1.45E-79 | NK cells | MRPS6    |
| 11795 | UAP1.1     | 7.75E-84 | 0.347259 | 0.145 | 0.058 | 1.45E-79 | NK cells | UAP1     |
| 11796 | APOL6.2    | 1.90E-83 | 0.441962 | 0.193 | 0.09  | 3.56E-79 | NK cells | APOL6    |
| 11797 | ARPC5.5    | 1.92E-83 | 0.442626 | 0.703 | 0.618 | 3.61E-79 | NK cells | ARPC5    |
| 11798 | PCBP1.5    | 1.97E-83 | 0.342355 | 0.905 | 0.872 | 3.71E-79 | NK cells | PCBP1    |
| 11799 | HSPB11     | 5.81E-83 | 0.499974 | 0.338 | 0.207 | 1.09E-78 | NK cells | HSPB11   |
| 11800 | LAIR1.3    | 5.85E-83 | 0.540734 | 0.337 | 0.204 | 1.10E-78 | NK cells | LAIR1    |
| 11801 | TKT.5      | 7.40E-83 | -0.67758 | 0.359 | 0.52  | 1.39E-78 | NK cells | TKT      |
| 11802 | PARK7.2    | 9.10E-83 | 0.43058  | 0.69  | 0.62  | 1.71E-78 | NK cells | PARK7    |
| 11803 | CYCS.2     | 1.11E-82 | 0.489708 | 0.443 | 0.309 | 2.09E-78 | NK cells | CYCS     |
| 11804 | SIRPG.6    | 1.38E-82 | -0.54287 | 0.051 | 0.183 | 2.59E-78 | NK cells | SIRPG    |
| 11805 | GPAA1.3    | 1.43E-82 | 0.480101 | 0.356 | 0.221 | 2.69E-78 | NK cells | GPAA1    |
| 11806 | SPCS3.4    | 1.63E-82 | 0.515132 | 0.344 | 0.21  | 3.06E-78 | NK cells | SPCS3    |
| 11807 | CFP.6      | 3.92E-82 | -0.58678 | 0.008 | 0.122 | 7.37E-78 | NK cells | CFP      |
| 11808 | CD22.5     | 4.38E-82 | -0.56329 | 0.006 | 0.119 | 8.23E-78 | NK cells | CD22     |
| 11809 | IL6ST.5    | 5.69E-82 | -0.50745 | 0.051 | 0.187 | 1.07E-77 | NK cells | IL6ST    |
| 11810 | GIMAP6.4   | 1.23E-81 | 0.445851 | 0.29  | 0.163 | 2.31E-77 | NK cells | GIMAP6   |
| 11811 | BIRC3.2    | 1.65E-81 | -0.56661 | 0.044 | 0.177 | 3.09E-77 | NK cells | BIRC3    |
| 11812 | RHOG.4     | 1.76E-81 | 0.411591 | 0.643 | 0.505 | 3.30E-77 | NK cells | RHOG     |
| 11813 | C19orf66.3 | 2.20E-81 | 0.497008 | 0.443 | 0.303 | 4.14E-77 | NK cells | C19orf66 |
| 11814 | PQLC3.2    | 3.50E-81 | 0.438599 | 0.276 | 0.154 | 6.57E-77 | NK cells | PQLC3    |
| 11815 | GSAP.3     | 3.98E-81 | 0.443022 | 0.172 | 0.077 | 7.47E-77 | NK cells | GSAP     |
| 11816 | ARHGEF3.2  | 4.69E-81 | 0.461063 | 0.267 | 0.147 | 8.80E-77 | NK cells | ARHGEF3  |
| 11817 | HMGB1.5    | 6.43E-81 | 0.458919 | 0.828 | 0.813 | 1.21E-76 | NK cells | HMGB1    |
| 11818 | PIK3R1.3   | 6.91E-81 | 0.528147 | 0.316 | 0.188 | 1.30E-76 | NK cells | PIK3R1   |
| 11819 | TMEM109    | 1.26E-80 | 0.461446 | 0.382 | 0.244 | 2.37E-76 | NK cells | TMEM109  |
| 11820 | ASNA1.1    | 2.11E-80 | 0.450649 | 0.323 | 0.195 | 3.96E-76 | NK cells | ASNA1    |
| 11821 | CRELD2.2   | 5.31E-80 | 0.45656  | 0.25  | 0.133 | 9.98E-76 | NK cells | CRELD2   |
| 11822 | SYNGR2.4   | 1.35E-79 | -0.61246 | 0.375 | 0.525 | 2.54E-75 | NK cells | SYNGR2   |
| 11823 | FAM96B.2   | 1.47E-79 | 0.466579 | 0.552 | 0.435 | 2.76E-75 | NK cells | FAM96B   |
| 11824 | ADCY7.1    | 5.18E-79 | 0.404791 | 0.184 | 0.086 | 9.72E-75 | NK cells | ADCY7    |
| 11825 | SQSTM1.4   | 7.31E-79 | 0.481972 | 0.56  | 0.432 | 1.37E-74 | NK cells | SQSTM1   |
| 11826 | CASP8.1    | 1.24E-78 | 0.481984 | 0.302 | 0.178 | 2.32E-74 | NK cells | CASP8    |
| 11827 | ATP5F1B.2  | 1.31E-78 | 0.391695 | 0.745 | 0.689 | 2.45E-74 | NK cells | ATP5F1B  |
| 11828 | R3HDM4.2   | 1.45E-78 | -0.46198 | 0.198 | 0.366 | 2.73E-74 | NK cells | R3HDM4   |
| 11829 | PLD4.4     | 1.52E-78 | -0.5963  | 0.004 | 0.112 | 2.86E-74 | NK cells | PLD4     |
| 11830 | HSPB1.7    | 1.59E-78 | -0.50602 | 0.304 | 0.478 | 3.00E-74 | NK cells | HSPB1    |
| 11831 | VCL.2      | 2.95E-78 | 0.358623 | 0.157 | 0.068 | 5.55E-74 | NK cells | VCL      |
| 11832 | NEDD8.2    | 3.00E-78 | 0.474613 | 0.597 | 0.489 | 5.63E-74 | NK cells | NEDD8    |
| 11833 | RPL37A.4   | 3.50E-78 | -0.38515 | 0.756 | 0.843 | 6.58E-74 | NK cells | RPL37A   |
| 11834 | DEK.3      | 7.82E-78 | 0.530565 | 0.44  | 0.319 | 1.47E-73 | NK cells | DEK      |
| 11835 | H2AFZ.4    | 1.02E-77 | 0.675587 | 0.605 | 0.518 | 1.91E-73 | NK cells | H2AFZ    |
| 11836 | IFI30.4    | 1.39E-77 | -0.68519 | 0.017 | 0.131 | 2.60E-73 | NK cells | IFI30    |
| 11837 | SERPINA1.1 | 1.60E-77 | -1.60004 | 0.01  | 0.12  | 3.01E-73 | NK cells | SERPINA1 |
| 11838 | DGKZ.3     | 2.49E-77 | 0.440179 | 0.265 | 0.146 | 4.68E-73 | NK cells | DGKZ     |
| 11839 | C9orf16.5  | 5.05E-77 | 0.418749 | 0.682 | 0.589 | 9.49E-73 | NK cells | C9orf16  |
| 11840 | TMEM14C    | 6.36E-77 | -0.428   | 0.093 | 0.236 | 1.19E-72 | NK cells | TMEM14C  |

|       |           |          |          |       |       |          |          |           |
|-------|-----------|----------|----------|-------|-------|----------|----------|-----------|
| 11841 | VPS16     | 7.13E-77 | 0.381352 | 0.192 | 0.092 | 1.34E-72 | NK cells | VPS16     |
| 11842 | COX17.3   | 7.94E-77 | 0.504015 | 0.422 | 0.291 | 1.49E-72 | NK cells | COX17     |
| 11843 | CDCA7L.4  | 8.99E-77 | -0.54623 | 0.047 | 0.172 | 1.69E-72 | NK cells | CDCA7L    |
| 11844 | PARP8.3   | 1.65E-76 | 0.439229 | 0.266 | 0.147 | 3.11E-72 | NK cells | PARP8     |
| 11845 | LINC01550 | 1.88E-76 | -0.48387 | 0.031 | 0.149 | 3.53E-72 | NK cells | LINC01550 |
| 11846 | SH3BP5.4  | 2.02E-76 | 0.434244 | 0.366 | 0.227 | 3.80E-72 | NK cells | SH3BP5    |
| 11847 | MNDA.6    | 2.15E-76 | -1.00286 | 0.011 | 0.121 | 4.04E-72 | NK cells | MNDA      |
| 11848 | CD180.2   | 3.03E-76 | -0.45064 | 0.004 | 0.108 | 5.70E-72 | NK cells | CD180     |
| 11849 | ATP5MF.5  | 3.83E-76 | 0.402295 | 0.707 | 0.63  | 7.20E-72 | NK cells | ATP5MF    |
| 11850 | NCOA1     | 7.90E-76 | 0.31059  | 0.121 | 0.046 | 1.48E-71 | NK cells | NCOA1     |
| 11851 | SIGIRR.4  | 8.52E-76 | 0.473168 | 0.519 | 0.389 | 1.60E-71 | NK cells | SIGIRR    |
| 11852 | CTDSP1.3  | 1.30E-75 | 0.447713 | 0.293 | 0.171 | 2.44E-71 | NK cells | CTDSP1    |
| 11853 | NELL2.5   | 1.48E-75 | -0.46809 | 0.014 | 0.125 | 2.78E-71 | NK cells | NELL2     |
| 11854 | EDF1.1    | 1.55E-75 | 0.348123 | 0.824 | 0.767 | 2.90E-71 | NK cells | EDF1      |
| 11855 | RAB8A.3   | 2.21E-75 | 0.464473 | 0.39  | 0.258 | 4.14E-71 | NK cells | RAB8A     |
| 11856 | BRK1.2    | 2.36E-75 | 0.381197 | 0.761 | 0.704 | 4.43E-71 | NK cells | BRK1      |
| 11857 | POU2F2.5  | 3.28E-75 | -0.54571 | 0.101 | 0.245 | 6.16E-71 | NK cells | POU2F2    |
| 11858 | COMMD4.   | 3.57E-75 | 0.384805 | 0.2   | 0.098 | 6.72E-71 | NK cells | COMMD4    |
| 11859 | SPCS2.3   | 3.79E-75 | 0.462489 | 0.538 | 0.41  | 7.13E-71 | NK cells | SPCS2     |
| 11860 | RAB31.4   | 6.28E-75 | -0.48205 | 0.009 | 0.116 | 1.18E-70 | NK cells | RAB31     |
| 11861 | PRMT2.5   | 8.81E-75 | 0.472097 | 0.649 | 0.526 | 1.66E-70 | NK cells | PRMT2     |
| 11862 | MNAT1     | 1.16E-74 | 0.309456 | 0.148 | 0.063 | 2.19E-70 | NK cells | MNAT1     |
| 11863 | COX4I1.2  | 1.18E-74 | -0.26144 | 0.923 | 0.962 | 2.22E-70 | NK cells | COX4I1    |
| 11864 | TSPAN13.4 | 1.37E-74 | -0.54624 | 0.013 | 0.122 | 2.58E-70 | NK cells | TSPAN13   |
| 11865 | ARIH2.2   | 1.95E-74 | 0.452147 | 0.362 | 0.232 | 3.67E-70 | NK cells | ARIH2     |
| 11866 | TXNIP.4   | 2.45E-74 | 0.43858  | 0.834 | 0.766 | 4.60E-70 | NK cells | TXNIP     |
| 11867 | MT-ND3.4  | 2.85E-74 | -0.29832 | 0.953 | 0.972 | 5.36E-70 | NK cells | MT-ND3    |
| 11868 | HLA-DRB1. | 3.51E-74 | -1.8011  | 0.365 | 0.438 | 6.59E-70 | NK cells | HLA-DRB1  |
| 11869 | AFF3.5    | 3.94E-74 | -0.50003 | 0.015 | 0.124 | 7.41E-70 | NK cells | AFF3      |
| 11870 | SLFN5.5   | 5.17E-74 | 0.466403 | 0.384 | 0.248 | 9.72E-70 | NK cells | SLFN5     |
| 11871 | GLTP.2    | 8.62E-74 | 0.418149 | 0.256 | 0.143 | 1.62E-69 | NK cells | GLTP      |
| 11872 | TSEN15.2  | 1.02E-73 | 0.418158 | 0.279 | 0.16  | 1.91E-69 | NK cells | TSEN15    |
| 11873 | FCN1.7    | 1.63E-73 | -1.48289 | 0.009 | 0.113 | 3.07E-69 | NK cells | FCN1      |
| 11874 | SDF2      | 2.18E-73 | 0.441686 | 0.289 | 0.171 | 4.10E-69 | NK cells | SDF2      |
| 11875 | GAPT.3    | 2.36E-73 | -0.46874 | 0.006 | 0.109 | 4.44E-69 | NK cells | GAPT      |
| 11876 | MIDN.1    | 2.38E-73 | 0.378577 | 0.161 | 0.073 | 4.47E-69 | NK cells | MIDN      |
| 11877 | IDI1.2    | 9.62E-73 | 0.465608 | 0.293 | 0.173 | 1.81E-68 | NK cells | IDI1      |
| 11878 | CXXC5.6   | 1.28E-72 | 0.395688 | 0.249 | 0.133 | 2.40E-68 | NK cells | CXXC5     |
| 11879 | SRI.4     | 1.30E-72 | 0.46149  | 0.498 | 0.377 | 2.44E-68 | NK cells | SRI       |
| 11880 | RPL27.4   | 1.47E-72 | -0.26731 | 0.907 | 0.955 | 2.76E-68 | NK cells | RPL27     |
| 11881 | JPT1.5    | 5.12E-72 | 0.502212 | 0.423 | 0.3   | 9.61E-68 | NK cells | JPT1      |
| 11882 | TBC1D10C  | 5.20E-72 | 0.398385 | 0.749 | 0.656 | 9.77E-68 | NK cells | TBC1D10C  |
| 11883 | RNPEPL1.2 | 5.24E-72 | 0.402609 | 0.218 | 0.114 | 9.84E-68 | NK cells | RNPEPL1   |
| 11884 | NFATC3.3  | 5.75E-72 | 0.412898 | 0.264 | 0.149 | 1.08E-67 | NK cells | NFATC3    |
| 11885 | GNG7.3    | 8.84E-72 | -0.41446 | 0.006 | 0.107 | 1.66E-67 | NK cells | GNG7      |
| 11886 | MPEG1.2   | 1.31E-71 | -0.42115 | 0.005 | 0.106 | 2.46E-67 | NK cells | MPEG1     |
| 11887 | KIFAP3.1  | 1.50E-71 | 0.346648 | 0.162 | 0.074 | 2.81E-67 | NK cells | KIFAP3    |

|       |           |          |          |       |       |          |          |            |
|-------|-----------|----------|----------|-------|-------|----------|----------|------------|
| 11888 | ARHGDIB.4 | 2.90E-71 | 0.262837 | 0.961 | 0.961 | 5.45E-67 | NK cells | ARHGDIB    |
| 11889 | FEN1.1    | 6.55E-71 | 0.296087 | 0.127 | 0.051 | 1.23E-66 | NK cells | FEN1       |
| 11890 | BCL11A.3  | 7.56E-71 | -0.42179 | 0.003 | 0.1   | 1.42E-66 | NK cells | BCL11A     |
| 11891 | FAM102A.. | 8.25E-71 | -0.42441 | 0.031 | 0.143 | 1.55E-66 | NK cells | FAM102A    |
| 11892 | RAB11FIP1 | 1.15E-70 | 0.378269 | 0.188 | 0.092 | 2.16E-66 | NK cells | RAB11FIP1  |
| 11893 | RPL17.4   | 1.61E-70 | -0.38172 | 0.566 | 0.723 | 3.03E-66 | NK cells | RPL17      |
| 11894 | AC119396. | 2.00E-70 | -0.47501 | 0.125 | 0.269 | 3.75E-66 | NK cells | AC119396.1 |
| 11895 | SHISA5.2  | 3.18E-70 | 0.446425 | 0.559 | 0.439 | 5.98E-66 | NK cells | SHISA5     |
| 11896 | PIN1.1    | 3.30E-70 | 0.45482  | 0.384 | 0.26  | 6.20E-66 | NK cells | PIN1       |
| 11897 | CMTM7.2   | 3.69E-70 | -0.44289 | 0.107 | 0.245 | 6.93E-66 | NK cells | CMTM7      |
| 11898 | LYZ.6     | 5.10E-70 | -2.26197 | 0.029 | 0.14  | 9.59E-66 | NK cells | LYZ        |
| 11899 | DAD1.3    | 1.25E-69 | 0.426306 | 0.666 | 0.578 | 2.35E-65 | NK cells | DAD1       |
| 11900 | KLRG1.2   | 1.81E-69 | 0.339752 | 0.172 | 0.08  | 3.41E-65 | NK cells | KLRG1      |
| 11901 | CCNI.2    | 3.45E-69 | -0.31203 | 0.792 | 0.877 | 6.48E-65 | NK cells | CCNI       |
| 11902 | CIB1.4    | 3.52E-69 | 0.426808 | 0.612 | 0.51  | 6.61E-65 | NK cells | CIB1       |
| 11903 | LY96.1    | 3.69E-69 | -0.38178 | 0.015 | 0.118 | 6.92E-65 | NK cells | LY96       |
| 11904 | TXN.5     | 3.75E-69 | 0.360761 | 0.483 | 0.351 | 7.05E-65 | NK cells | TXN        |
| 11905 | VCP.3     | 6.74E-69 | 0.450318 | 0.513 | 0.396 | 1.27E-64 | NK cells | VCP        |
| 11906 | CAPG.5    | 7.24E-69 | -0.54563 | 0.088 | 0.22  | 1.36E-64 | NK cells | CAPG       |
| 11907 | FBXW5.2   | 7.32E-69 | 0.479128 | 0.359 | 0.236 | 1.38E-64 | NK cells | FBXW5      |
| 11908 | ATOX1.5   | 8.33E-69 | 0.484133 | 0.352 | 0.229 | 1.57E-64 | NK cells | ATOX1      |
| 11909 | POLR2K.1  | 1.17E-68 | 0.469936 | 0.397 | 0.274 | 2.20E-64 | NK cells | POLR2K     |
| 11910 | NDUFS6.4  | 1.28E-68 | 0.465043 | 0.472 | 0.356 | 2.41E-64 | NK cells | NDUFS6     |
| 11911 | PLP2.3    | 4.15E-68 | -0.49961 | 0.228 | 0.383 | 7.80E-64 | NK cells | PLP2       |
| 11912 | PIM2.4    | 5.18E-68 | -0.50159 | 0.17  | 0.317 | 9.73E-64 | NK cells | PIM2       |
| 11913 | GBP4.2    | 5.75E-68 | 0.389537 | 0.221 | 0.117 | 1.08E-63 | NK cells | GBP4       |
| 11914 | PSMA4.4   | 5.80E-68 | 0.481057 | 0.44  | 0.323 | 1.09E-63 | NK cells | PSMA4      |
| 11915 | UBE2E3.2  | 6.88E-68 | 0.404628 | 0.298 | 0.182 | 1.29E-63 | NK cells | UBE2E3     |
| 11916 | COMTD1    | 8.70E-68 | 0.373081 | 0.217 | 0.115 | 1.63E-63 | NK cells | COMTD1     |
| 11917 | PPP2R5C.5 | 1.71E-67 | 0.437347 | 0.32  | 0.199 | 3.20E-63 | NK cells | PPP2R5C    |
| 11918 | SCIMP.5   | 2.67E-67 | -0.43071 | 0.01  | 0.107 | 5.01E-63 | NK cells | SCIMP      |
| 11919 | IKBKG.2   | 3.04E-67 | 0.391752 | 0.217 | 0.115 | 5.71E-63 | NK cells | IKBKG      |
| 11920 | RAC1.4    | 3.04E-67 | 0.313373 | 0.621 | 0.488 | 5.72E-63 | NK cells | RAC1       |
| 11921 | LINC00861 | 3.41E-67 | 0.38181  | 0.605 | 0.438 | 6.40E-63 | NK cells | LINC00861  |
| 11922 | VPS26A    | 4.70E-67 | 0.408107 | 0.24  | 0.134 | 8.84E-63 | NK cells | VPS26A     |
| 11923 | BAX.3     | 4.98E-67 | 0.504612 | 0.495 | 0.374 | 9.35E-63 | NK cells | BAX        |
| 11924 | DNAJC3.3  | 5.02E-67 | 0.390948 | 0.249 | 0.141 | 9.44E-63 | NK cells | DNAJC3     |
| 11925 | RNASE6.3  | 6.76E-67 | -0.44613 | 0.016 | 0.118 | 1.27E-62 | NK cells | RNASE6     |
| 11926 | ARF6.2    | 7.14E-67 | 0.448598 | 0.312 | 0.193 | 1.34E-62 | NK cells | ARF6       |
| 11927 | FCMR.6    | 7.98E-67 | -0.56205 | 0.459 | 0.585 | 1.50E-62 | NK cells | FCMR       |
| 11928 | IGLC3.3   | 1.51E-66 | -1.03147 | 0.008 | 0.103 | 2.84E-62 | NK cells | IGLC3      |
| 11929 | UFC1.2    | 1.79E-66 | 0.429796 | 0.597 | 0.503 | 3.36E-62 | NK cells | UFC1       |
| 11930 | LAPTM5.4  | 1.83E-66 | -0.43134 | 0.793 | 0.876 | 3.44E-62 | NK cells | LAPTM5     |
| 11931 | MT-CO1.3  | 2.20E-66 | 0.273292 | 0.998 | 0.996 | 4.13E-62 | NK cells | MT-CO1     |
| 11932 | LRP10.2   | 4.07E-66 | 0.447694 | 0.357 | 0.236 | 7.64E-62 | NK cells | LRP10      |
| 11933 | MARCKSL1  | 4.51E-66 | -0.48473 | 0.14  | 0.282 | 8.47E-62 | NK cells | MARCKSL1   |
| 11934 | EIF2B2    | 4.64E-66 | 0.348603 | 0.181 | 0.09  | 8.71E-62 | NK cells | EIF2B2     |

|       |            |          |          |       |       |          |          |            |
|-------|------------|----------|----------|-------|-------|----------|----------|------------|
| 11935 | COPE.3     | 4.72E-66 | 0.449407 | 0.577 | 0.479 | 8.87E-62 | NK cells | COPE       |
| 11936 | PCED1B.4   | 7.92E-66 | -0.53793 | 0.165 | 0.305 | 1.49E-61 | NK cells | PCED1B     |
| 11937 | TMEM160.   | 8.45E-66 | 0.439765 | 0.452 | 0.334 | 1.59E-61 | NK cells | TMEM160    |
| 11938 | TNFRSF1B.  | 1.20E-65 | 0.306241 | 0.264 | 0.148 | 2.25E-61 | NK cells | TNFRSF1B   |
| 11939 | ATP5IF1.1  | 1.32E-65 | 0.41849  | 0.647 | 0.574 | 2.48E-61 | NK cells | ATP5IF1    |
| 11940 | IL4R.4     | 1.76E-65 | -0.58331 | 0.082 | 0.207 | 3.30E-61 | NK cells | IL4R       |
| 11941 | NFKBIZ.2   | 1.79E-65 | -0.39975 | 0.038 | 0.148 | 3.36E-61 | NK cells | NFKBIZ     |
| 11942 | PSMB3.4    | 1.91E-65 | 0.407944 | 0.6   | 0.502 | 3.59E-61 | NK cells | PSMB3      |
| 11943 | M6PR.2     | 2.51E-65 | 0.436685 | 0.482 | 0.362 | 4.72E-61 | NK cells | M6PR       |
| 11944 | FCRL3.2    | 2.81E-65 | 0.332461 | 0.138 | 0.06  | 5.27E-61 | NK cells | FCRL3      |
| 11945 | CFD.2      | 3.51E-65 | -0.86216 | 0.008 | 0.101 | 6.60E-61 | NK cells | CFD        |
| 11946 | TOMM7.5    | 4.42E-65 | -0.32806 | 0.72  | 0.828 | 8.31E-61 | NK cells | TOMM7      |
| 11947 | ARL6IP1.1  | 4.63E-65 | 0.419211 | 0.227 | 0.125 | 8.69E-61 | NK cells | ARL6IP1    |
| 11948 | CD44.5     | 5.30E-65 | -0.40473 | 0.285 | 0.449 | 9.95E-61 | NK cells | CD44       |
| 11949 | ENO1.4     | 7.09E-65 | 0.39898  | 0.7   | 0.641 | 1.33E-60 | NK cells | ENO1       |
| 11950 | NCF2.2     | 7.41E-65 | -0.46748 | 0.008 | 0.101 | 1.39E-60 | NK cells | NCF2       |
| 11951 | CIDEB      | 7.80E-65 | 0.257971 | 0.105 | 0.04  | 1.47E-60 | NK cells | CIDEB      |
| 11952 | ITGB1BP1.  | 8.58E-65 | 0.444831 | 0.318 | 0.203 | 1.61E-60 | NK cells | ITGB1BP1   |
| 11953 | CD68.6     | 1.90E-64 | -0.7429  | 0.013 | 0.109 | 3.58E-60 | NK cells | CD68       |
| 11954 | ATP6V0E1.  | 1.93E-64 | 0.366149 | 0.757 | 0.686 | 3.63E-60 | NK cells | ATP6V0E1   |
| 11955 | NDUFA12..  | 6.37E-64 | 0.404634 | 0.628 | 0.551 | 1.20E-59 | NK cells | NDUFA12    |
| 11956 | LCP2.3     | 7.15E-64 | 0.428029 | 0.474 | 0.347 | 1.34E-59 | NK cells | LCP2       |
| 11957 | SSBP3      | 9.38E-64 | 0.290221 | 0.118 | 0.049 | 1.76E-59 | NK cells | SSBP3      |
| 11958 | AC025164.  | 1.13E-63 | -0.4368  | 0.047 | 0.16  | 2.13E-59 | NK cells | AC025164.1 |
| 11959 | GNB2.5     | 1.28E-63 | 0.418849 | 0.519 | 0.399 | 2.40E-59 | NK cells | GNB2       |
| 11960 | S100A6.6   | 1.85E-63 | -0.2654  | 0.819 | 0.747 | 3.47E-59 | NK cells | S100A6     |
| 11961 | TNFAIP3    | 1.94E-63 | 0.358949 | 0.173 | 0.085 | 3.64E-59 | NK cells | TNFAIP3    |
| 11962 | UXT.3      | 2.41E-63 | -0.36044 | 0.515 | 0.667 | 4.52E-59 | NK cells | UXT        |
| 11963 | COPZ1.2    | 2.76E-63 | 0.45735  | 0.427 | 0.31  | 5.19E-59 | NK cells | COPZ1      |
| 11964 | POU2AF1.4  | 3.14E-63 | -0.41824 | 0.01  | 0.101 | 5.89E-59 | NK cells | POU2AF1    |
| 11965 | RNF7.3     | 3.36E-63 | 0.426468 | 0.513 | 0.402 | 6.31E-59 | NK cells | RNF7       |
| 11966 | LEPROTL1.  | 3.44E-63 | -0.48856 | 0.375 | 0.511 | 6.47E-59 | NK cells | LEPROTL1   |
| 11967 | CD2BP2.2   | 3.89E-63 | 0.422939 | 0.306 | 0.193 | 7.30E-59 | NK cells | CD2BP2     |
| 11968 | C16orf74.2 | 5.48E-63 | -0.38956 | 0.017 | 0.115 | 1.03E-58 | NK cells | C16orf74   |
| 11969 | PLEKHA1.3  | 1.68E-62 | 0.400214 | 0.229 | 0.128 | 3.16E-58 | NK cells | PLEKHA1    |
| 11970 | FAM30A.4   | 1.97E-62 | -0.53516 | 0.009 | 0.1   | 3.70E-58 | NK cells | FAM30A     |
| 11971 | KLF6.6     | 2.64E-62 | 0.416428 | 0.442 | 0.31  | 4.96E-58 | NK cells | KLF6       |
| 11972 | SSNA1.1    | 2.98E-62 | 0.440399 | 0.46  | 0.348 | 5.60E-58 | NK cells | SSNA1      |
| 11973 | VPS37B.3   | 4.54E-62 | 0.395779 | 0.236 | 0.134 | 8.53E-58 | NK cells | VPS37B     |
| 11974 | GIMAP4.5   | 5.92E-62 | 0.31634  | 0.716 | 0.558 | 1.11E-57 | NK cells | GIMAP4     |
| 11975 | NAPA       | 6.01E-62 | 0.439745 | 0.428 | 0.312 | 1.13E-57 | NK cells | NAPA       |
| 11976 | HHEX.4     | 6.10E-62 | -0.4018  | 0.023 | 0.123 | 1.15E-57 | NK cells | HHEX       |
| 11977 | HLA-DRB5.  | 6.37E-62 | -1.93822 | 0.317 | 0.399 | 1.20E-57 | NK cells | HLA-DRB5   |
| 11978 | EPHX2.4    | 6.57E-62 | -0.36901 | 0.018 | 0.114 | 1.23E-57 | NK cells | EPHX2      |
| 11979 | PDIA4.3    | 9.31E-62 | 0.425213 | 0.331 | 0.214 | 1.75E-57 | NK cells | PDIA4      |
| 11980 | RNF115.1   | 1.14E-61 | 0.355739 | 0.24  | 0.136 | 2.14E-57 | NK cells | RNF115     |
| 11981 | ZNF276     | 1.47E-61 | 0.38522  | 0.197 | 0.105 | 2.77E-57 | NK cells | ZNF276     |



|       |            |          |          |       |       |          |          |            |
|-------|------------|----------|----------|-------|-------|----------|----------|------------|
| 11982 | TCF4.5     | 1.51E-61 | -0.46248 | 0.03  | 0.132 | 2.83E-57 | NK cells | TCF4       |
| 11983 | TWF2.3     | 1.81E-61 | 0.418967 | 0.534 | 0.427 | 3.41E-57 | NK cells | TWF2       |
| 11984 | CDKN2D.4   | 2.28E-61 | 0.458261 | 0.301 | 0.19  | 4.27E-57 | NK cells | CDKN2D     |
| 11985 | NSA2.3     | 3.27E-61 | -0.38739 | 0.375 | 0.534 | 6.15E-57 | NK cells | NSA2       |
| 11986 | SKA2.1     | 3.33E-61 | 0.326269 | 0.177 | 0.089 | 6.25E-57 | NK cells | SKA2       |
| 11987 | SRPK2.3    | 3.50E-61 | 0.438313 | 0.376 | 0.259 | 6.58E-57 | NK cells | SRPK2      |
| 11988 | APP.3      | 3.51E-61 | -0.3326  | 0.015 | 0.108 | 6.59E-57 | NK cells | APP        |
| 11989 | LSM1.1     | 3.55E-61 | 0.382255 | 0.304 | 0.191 | 6.66E-57 | NK cells | LSM1       |
| 11990 | CD72.6     | 4.44E-61 | -0.71509 | 0.055 | 0.164 | 8.34E-57 | NK cells | CD72       |
| 11991 | MAP1LC3B   | 4.55E-61 | 0.448539 | 0.481 | 0.368 | 8.55E-57 | NK cells | MAP1LC3B   |
| 11992 | ATP5MD.5   | 5.36E-61 | 0.396865 | 0.684 | 0.608 | 1.01E-56 | NK cells | ATP5MD     |
| 11993 | UBE2E2.1   | 6.42E-61 | -0.32484 | 0.011 | 0.102 | 1.21E-56 | NK cells | UBE2E2     |
| 11994 | RNASEH2A   | 7.68E-61 | 0.284194 | 0.165 | 0.08  | 1.44E-56 | NK cells | RNASEH2A   |
| 11995 | VPS26B.1   | 8.36E-61 | 0.372025 | 0.199 | 0.107 | 1.57E-56 | NK cells | VPS26B     |
| 11996 | CD40LG.4   | 8.43E-61 | -0.44846 | 0.023 | 0.119 | 1.58E-56 | NK cells | CD40LG     |
| 11997 | RPL23.4    | 8.74E-61 | -0.36019 | 0.512 | 0.665 | 1.64E-56 | NK cells | RPL23      |
| 11998 | PRKAR1A.4  | 9.53E-61 | 0.455125 | 0.426 | 0.309 | 1.79E-56 | NK cells | PRKAR1A    |
| 11999 | SUMO1.1    | 1.09E-60 | 0.390616 | 0.588 | 0.498 | 2.04E-56 | NK cells | SUMO1      |
| 12000 | PSMC3.1    | 1.48E-60 | 0.415719 | 0.361 | 0.248 | 2.78E-56 | NK cells | PSMC3      |
| 12001 | SMIM29.4   | 1.95E-60 | 0.409723 | 0.282 | 0.173 | 3.67E-56 | NK cells | SMIM29     |
| 12002 | LINC02273  | 2.01E-60 | -0.40273 | 0.048 | 0.155 | 3.78E-56 | NK cells | LINC02273  |
| 12003 | AC022706.1 | 2.70E-60 | 0.284965 | 0.102 | 0.04  | 5.08E-56 | NK cells | AC022706.1 |
| 12004 | IFI35.2    | 2.86E-60 | 0.407725 | 0.315 | 0.202 | 5.37E-56 | NK cells | IFI35      |
| 12005 | XPNPEP1.1  | 3.30E-60 | 0.319882 | 0.181 | 0.093 | 6.21E-56 | NK cells | XPNPEP1    |
| 12006 | RER1.2     | 4.10E-60 | 0.430403 | 0.427 | 0.314 | 7.71E-56 | NK cells | RER1       |
| 12007 | ETFA.2     | 4.37E-60 | 0.400138 | 0.343 | 0.231 | 8.21E-56 | NK cells | ETFA       |
| 12008 | SFT2D1.2   | 5.60E-60 | 0.456024 | 0.351 | 0.236 | 1.05E-55 | NK cells | SFT2D1     |
| 12009 | CPQ.1      | 7.72E-60 | 0.289679 | 0.11  | 0.045 | 1.45E-55 | NK cells | CPQ        |
| 12010 | DYNLT1.6   | 1.15E-59 | 0.410289 | 0.401 | 0.281 | 2.17E-55 | NK cells | DYNLT1     |
| 12011 | BCL2A1.4   | 1.73E-59 | -0.61373 | 0.061 | 0.173 | 3.25E-55 | NK cells | BCL2A1     |
| 12012 | DENND1B    | 1.95E-59 | 0.264919 | 0.117 | 0.05  | 3.67E-55 | NK cells | DENND1B    |
| 12013 | ATP6V1G1   | 2.74E-59 | -0.3095  | 0.676 | 0.798 | 5.15E-55 | NK cells | ATP6V1G1   |
| 12014 | CD96.5     | 5.10E-59 | 0.371536 | 0.3   | 0.186 | 9.58E-55 | NK cells | CD96       |
| 12015 | RAB5IF.3   | 6.53E-59 | 0.424811 | 0.399 | 0.283 | 1.23E-54 | NK cells | RAB5IF     |
| 12016 | JCHAIN.4   | 6.61E-59 | -1.63306 | 0.022 | 0.117 | 1.24E-54 | NK cells | JCHAIN     |
| 12017 | SORL1.4    | 7.21E-59 | 0.409977 | 0.291 | 0.184 | 1.36E-54 | NK cells | SORL1      |
| 12018 | TACC3.4    | 9.74E-59 | -0.38468 | 0.087 | 0.205 | 1.83E-54 | NK cells | TACC3      |
| 12019 | IFI16.5    | 1.22E-58 | 0.425608 | 0.416 | 0.3   | 2.29E-54 | NK cells | IFI16      |
| 12020 | MEAF6.2    | 1.86E-58 | 0.393633 | 0.511 | 0.398 | 3.49E-54 | NK cells | MEAF6      |
| 12021 | RABIF.1    | 1.97E-58 | 0.370563 | 0.226 | 0.128 | 3.69E-54 | NK cells | RABIF      |
| 12022 | PRR13.4    | 2.02E-58 | 0.351394 | 0.718 | 0.652 | 3.79E-54 | NK cells | PRR13      |
| 12023 | TMEM9B     | 2.45E-58 | 0.415418 | 0.368 | 0.255 | 4.60E-54 | NK cells | TMEM9B     |
| 12024 | BTLA.2     | 2.61E-58 | -0.4044  | 0.013 | 0.101 | 4.91E-54 | NK cells | BTLA       |
| 12025 | ACTR1A.1   | 2.70E-58 | 0.390971 | 0.273 | 0.168 | 5.07E-54 | NK cells | ACTR1A     |
| 12026 | TRG-AS1.1  | 2.73E-58 | 0.357698 | 0.151 | 0.072 | 5.13E-54 | NK cells | TRG-AS1    |
| 12027 | RASA3.6    | 3.32E-58 | 0.439714 | 0.302 | 0.196 | 6.25E-54 | NK cells | RASA3      |
| 12028 | VASP.3     | 4.57E-58 | 0.391534 | 0.33  | 0.216 | 8.58E-54 | NK cells | VASP       |

|       |           |          |          |       |       |          |          |          |
|-------|-----------|----------|----------|-------|-------|----------|----------|----------|
| 12029 | AKAP13.3  | 6.72E-58 | 0.4264   | 0.409 | 0.291 | 1.26E-53 | NK cells | AKAP13   |
| 12030 | UHMK1.2   | 1.17E-57 | 0.391586 | 0.284 | 0.177 | 2.19E-53 | NK cells | UHMK1    |
| 12031 | CASP4.2   | 1.28E-57 | 0.426988 | 0.4   | 0.284 | 2.41E-53 | NK cells | CASP4    |
| 12032 | RPA2.3    | 1.34E-57 | 0.408462 | 0.405 | 0.287 | 2.51E-53 | NK cells | RPA2     |
| 12033 | TRAC.4    | 1.53E-57 | -0.49177 | 0.159 | 0.29  | 2.87E-53 | NK cells | TRAC     |
| 12034 | PTTG1.1   | 1.84E-57 | 0.36718  | 0.104 | 0.042 | 3.46E-53 | NK cells | PTTG1    |
| 12035 | S100A12.5 | 2.70E-57 | -2.69712 | 0.025 | 0.118 | 5.06E-53 | NK cells | S100A12  |
| 12036 | CLEC2D.4  | 2.71E-57 | -0.41121 | 0.191 | 0.33  | 5.10E-53 | NK cells | CLEC2D   |
| 12037 | MPG.3     | 6.26E-57 | 0.42896  | 0.395 | 0.283 | 1.18E-52 | NK cells | MPG      |
| 12038 | NT5C.5    | 7.99E-57 | 0.391395 | 0.489 | 0.369 | 1.50E-52 | NK cells | NT5C     |
| 12039 | ADRM1.2   | 8.54E-57 | 0.404106 | 0.459 | 0.351 | 1.60E-52 | NK cells | ADRM1    |
| 12040 | MAML2.3   | 9.00E-57 | -0.3872  | 0.059 | 0.168 | 1.69E-52 | NK cells | MAML2    |
| 12041 | IGLC2.3   | 9.34E-57 | -1.14422 | 0.019 | 0.109 | 1.76E-52 | NK cells | IGLC2    |
| 12042 | TSC22D4.2 | 9.97E-57 | 0.416638 | 0.44  | 0.327 | 1.87E-52 | NK cells | TSC22D4  |
| 12043 | RIN3.4    | 1.16E-56 | 0.425563 | 0.319 | 0.213 | 2.17E-52 | NK cells | RIN3     |
| 12044 | UQCRCQ.5  | 1.17E-56 | 0.39302  | 0.565 | 0.474 | 2.20E-52 | NK cells | UQCRCQ   |
| 12045 | ADK.3     | 1.77E-56 | -0.46399 | 0.102 | 0.219 | 3.33E-52 | NK cells | ADK      |
| 12046 | LIMS2.2   | 2.07E-56 | -0.37456 | 0.019 | 0.107 | 3.89E-52 | NK cells | LIMS2    |
| 12047 | CMTM3.2   | 2.38E-56 | 0.356929 | 0.222 | 0.126 | 4.47E-52 | NK cells | CMTM3    |
| 12048 | CYC1.2    | 2.52E-56 | 0.427855 | 0.432 | 0.324 | 4.74E-52 | NK cells | CYC1     |
| 12049 | ST13.3    | 2.64E-56 | -0.35207 | 0.5   | 0.638 | 4.96E-52 | NK cells | ST13     |
| 12050 | TUBB.4    | 3.79E-56 | 0.733369 | 0.628 | 0.578 | 7.12E-52 | NK cells | TUBB     |
| 12051 | TRAPPC10  | 4.01E-56 | 0.270134 | 0.109 | 0.046 | 7.53E-52 | NK cells | TRAPPC10 |
| 12052 | CHMP7.3   | 5.77E-56 | -0.41918 | 0.125 | 0.248 | 1.08E-51 | NK cells | CHMP7    |
| 12053 | SLC16A3.3 | 6.11E-56 | 0.360333 | 0.197 | 0.107 | 1.15E-51 | NK cells | SLC16A3  |
| 12054 | ABHD12    | 6.37E-56 | 0.294202 | 0.167 | 0.085 | 1.20E-51 | NK cells | ABHD12   |
| 12055 | NUCB1.4   | 6.69E-56 | 0.458954 | 0.436 | 0.332 | 1.26E-51 | NK cells | NUCB1    |
| 12056 | SEC11C.3  | 8.20E-56 | 0.330995 | 0.371 | 0.258 | 1.54E-51 | NK cells | SEC11C   |
| 12057 | UBE2L3.3  | 8.86E-56 | 0.42095  | 0.424 | 0.318 | 1.67E-51 | NK cells | UBE2L3   |
| 12058 | CYB561A3. | 9.55E-56 | -0.61805 | 0.137 | 0.255 | 1.79E-51 | NK cells | CYB561A3 |
| 12059 | NEDD9     | 1.20E-55 | 0.330729 | 0.144 | 0.069 | 2.25E-51 | NK cells | NEDD9    |
| 12060 | INPP4B.3  | 1.32E-55 | -0.38949 | 0.04  | 0.138 | 2.49E-51 | NK cells | INPP4B   |
| 12061 | ARHGAP3C  | 1.36E-55 | 0.453973 | 0.415 | 0.305 | 2.55E-51 | NK cells | ARHGAP30 |
| 12062 | COX7A2.4  | 1.90E-55 | 0.34873  | 0.73  | 0.695 | 3.58E-51 | NK cells | COX7A2   |
| 12063 | THEMIS.5  | 3.31E-55 | -0.37634 | 0.037 | 0.133 | 6.22E-51 | NK cells | THEMIS   |
| 12064 | A1BG.2    | 3.38E-55 | -0.35452 | 0.058 | 0.164 | 6.35E-51 | NK cells | A1BG     |
| 12065 | TMEM173.  | 4.11E-55 | 0.393914 | 0.292 | 0.186 | 7.72E-51 | NK cells | TMEM173  |
| 12066 | CLDND1.1  | 4.87E-55 | 0.419593 | 0.259 | 0.159 | 9.14E-51 | NK cells | CLDND1   |
| 12067 | RPS19BP1. | 6.05E-55 | 0.449639 | 0.441 | 0.334 | 1.14E-50 | NK cells | RPS19BP1 |
| 12068 | PLPP5.5   | 6.97E-55 | -0.72598 | 0.108 | 0.22  | 1.31E-50 | NK cells | PLPP5    |
| 12069 | RAB3GAP1  | 7.63E-55 | -0.31293 | 0.035 | 0.132 | 1.43E-50 | NK cells | RAB3GAP1 |
| 12070 | MT-CYB.2  | 8.13E-55 | -0.27344 | 0.922 | 0.953 | 1.53E-50 | NK cells | MT-CYB   |
| 12071 | EIF5A.3   | 9.46E-55 | 0.42177  | 0.597 | 0.525 | 1.78E-50 | NK cells | EIF5A    |
| 12072 | PTPN18.2  | 1.03E-54 | 0.320779 | 0.205 | 0.114 | 1.93E-50 | NK cells | PTPN18   |
| 12073 | RCN2.2    | 1.19E-54 | 0.412655 | 0.381 | 0.269 | 2.23E-50 | NK cells | RCN2     |
| 12074 | PSMC4.1   | 1.40E-54 | 0.384988 | 0.342 | 0.233 | 2.64E-50 | NK cells | PSMC4    |
| 12075 | HNRNPA3.  | 1.46E-54 | 0.421243 | 0.596 | 0.532 | 2.74E-50 | NK cells | HNRNPA3  |

|       |           |          |          |       |       |          |          |           |
|-------|-----------|----------|----------|-------|-------|----------|----------|-----------|
| 12076 | SUPT4H1.5 | 1.74E-54 | 0.438465 | 0.436 | 0.326 | 3.27E-50 | NK cells | SUPT4H1   |
| 12077 | YBX3.3    | 2.74E-54 | -0.36839 | 0.02  | 0.107 | 5.14E-50 | NK cells | YBX3      |
| 12078 | ATG4D     | 3.36E-54 | 0.257887 | 0.125 | 0.056 | 6.31E-50 | NK cells | ATG4D     |
| 12079 | CD151.3   | 3.39E-54 | 0.3332   | 0.185 | 0.1   | 6.37E-50 | NK cells | CD151     |
| 12080 | UBASH3A.1 | 3.46E-54 | -0.37229 | 0.037 | 0.13  | 6.50E-50 | NK cells | UBASH3A   |
| 12081 | TMED1     | 3.51E-54 | 0.319302 | 0.145 | 0.071 | 6.60E-50 | NK cells | TMED1     |
| 12082 | HIPK2     | 3.87E-54 | 0.354338 | 0.119 | 0.054 | 7.27E-50 | NK cells | HIPK2     |
| 12083 | DNMT1.3   | 3.88E-54 | 0.410623 | 0.311 | 0.207 | 7.29E-50 | NK cells | DNMT1     |
| 12084 | PSMA3.2   | 4.21E-54 | 0.433023 | 0.383 | 0.279 | 7.91E-50 | NK cells | PSMA3     |
| 12085 | GZMK.1    | 4.37E-54 | 0.353383 | 0.102 | 0.041 | 8.21E-50 | NK cells | GZMK      |
| 12086 | MDH2.4    | 8.64E-54 | 0.390218 | 0.541 | 0.451 | 1.62E-49 | NK cells | MDH2      |
| 12087 | ERN1.1    | 1.01E-53 | 0.286051 | 0.117 | 0.052 | 1.90E-49 | NK cells | ERN1      |
| 12088 | BTG2.3    | 1.35E-53 | -0.43637 | 0.16  | 0.293 | 2.54E-49 | NK cells | BTG2      |
| 12089 | SRSF9.1   | 1.53E-53 | 0.415384 | 0.377 | 0.269 | 2.87E-49 | NK cells | SRSF9     |
| 12090 | UQCR10.4  | 1.97E-53 | 0.338681 | 0.763 | 0.721 | 3.71E-49 | NK cells | UQCR10    |
| 12091 | NDUFV1.2  | 2.24E-53 | 0.42075  | 0.453 | 0.351 | 4.20E-49 | NK cells | NDUFV1    |
| 12092 | LDHA.4    | 2.32E-53 | 0.38633  | 0.653 | 0.588 | 4.37E-49 | NK cells | LDHA      |
| 12093 | HSP90AB1  | 2.33E-53 | -0.25827 | 0.75  | 0.848 | 4.38E-49 | NK cells | HSP90AB1  |
| 12094 | TMEM204   | 2.68E-53 | -0.395   | 0.076 | 0.184 | 5.03E-49 | NK cells | TMEM204   |
| 12095 | RECQL.1   | 4.69E-53 | 0.365061 | 0.27  | 0.169 | 8.82E-49 | NK cells | RECQL     |
| 12096 | COX7B.5   | 6.28E-53 | 0.408024 | 0.569 | 0.485 | 1.18E-48 | NK cells | COX7B     |
| 12097 | SEM1.4    | 7.60E-53 | 0.412678 | 0.498 | 0.409 | 1.43E-48 | NK cells | SEM1      |
| 12098 | SLC35B1.1 | 8.69E-53 | 0.288702 | 0.181 | 0.097 | 1.63E-48 | NK cells | SLC35B1   |
| 12099 | CERS4.1   | 8.88E-53 | 0.321112 | 0.159 | 0.08  | 1.67E-48 | NK cells | CERS4     |
| 12100 | BLOC1S1.2 | 8.90E-53 | 0.377178 | 0.527 | 0.416 | 1.67E-48 | NK cells | BLOC1S1   |
| 12101 | MED15.1   | 1.21E-52 | 0.341049 | 0.249 | 0.151 | 2.27E-48 | NK cells | MED15     |
| 12102 | SERINC5.3 | 1.26E-52 | -0.32962 | 0.029 | 0.118 | 2.37E-48 | NK cells | SERINC5   |
| 12103 | ZFP36L2.6 | 2.82E-52 | 0.343617 | 0.709 | 0.624 | 5.31E-48 | NK cells | ZFP36L2   |
| 12104 | PPA1.4    | 3.45E-52 | -0.34841 | 0.245 | 0.386 | 6.47E-48 | NK cells | PPA1      |
| 12105 | LINC00623 | 3.68E-52 | 0.384657 | 0.247 | 0.15  | 6.91E-48 | NK cells | LINC00623 |
| 12106 | EIF3F.3   | 3.80E-52 | -0.28908 | 0.667 | 0.793 | 7.13E-48 | NK cells | EIF3F     |
| 12107 | ZDHHC24.1 | 4.22E-52 | 0.316992 | 0.185 | 0.101 | 7.92E-48 | NK cells | ZDHHC24   |
| 12108 | HINT2     | 4.32E-52 | 0.392143 | 0.303 | 0.199 | 8.11E-48 | NK cells | HINT2     |
| 12109 | SMAP2.5   | 4.32E-52 | -0.3913  | 0.132 | 0.253 | 8.12E-48 | NK cells | SMAP2     |
| 12110 | ATP6V1F.2 | 5.35E-52 | 0.365125 | 0.583 | 0.485 | 1.00E-47 | NK cells | ATP6V1F   |
| 12111 | TMIGD2.3  | 1.06E-51 | 0.504252 | 0.279 | 0.182 | 1.98E-47 | NK cells | TMIGD2    |
| 12112 | TNFAIP8.5 | 1.24E-51 | -0.37276 | 0.362 | 0.503 | 2.33E-47 | NK cells | TNFAIP8   |
| 12113 | ATP5PF.3  | 2.10E-51 | 0.356765 | 0.624 | 0.558 | 3.95E-47 | NK cells | ATP5PF    |
| 12114 | INPP4A.1  | 2.24E-51 | 0.321354 | 0.148 | 0.074 | 4.21E-47 | NK cells | INPP4A    |
| 12115 | ARHGAP25  | 2.40E-51 | 0.362086 | 0.297 | 0.191 | 4.52E-47 | NK cells | ARHGAP25  |
| 12116 | ILKAP.1   | 2.69E-51 | 0.386207 | 0.304 | 0.201 | 5.06E-47 | NK cells | ILKAP     |
| 12117 | PEX2      | 3.49E-51 | 0.328922 | 0.233 | 0.139 | 6.55E-47 | NK cells | PEX2      |
| 12118 | ATP5PB.1  | 4.55E-51 | 0.359322 | 0.642 | 0.589 | 8.54E-47 | NK cells | ATP5PB    |
| 12119 | PPP4C.2   | 6.96E-51 | 0.386629 | 0.51  | 0.417 | 1.31E-46 | NK cells | PPP4C     |
| 12120 | SURF4.1   | 1.07E-50 | 0.363268 | 0.271 | 0.172 | 2.00E-46 | NK cells | SURF4     |
| 12121 | RABGAP1L  | 1.17E-50 | 0.360157 | 0.259 | 0.161 | 2.20E-46 | NK cells | RABGAP1L  |
| 12122 | ACP1.2    | 1.31E-50 | 0.397049 | 0.495 | 0.404 | 2.45E-46 | NK cells | ACP1      |

|       |           |          |          |       |       |          |          |          |
|-------|-----------|----------|----------|-------|-------|----------|----------|----------|
| 12123 | GATA3.4   | 1.86E-50 | 0.285171 | 0.196 | 0.108 | 3.50E-46 | NK cells | GATA3    |
| 12124 | ANP32B.5  | 1.88E-50 | -0.27111 | 0.494 | 0.663 | 3.52E-46 | NK cells | ANP32B   |
| 12125 | PRDX1.5   | 2.40E-50 | -0.27651 | 0.383 | 0.549 | 4.51E-46 | NK cells | PRDX1    |
| 12126 | DTX3      | 3.05E-50 | 0.275713 | 0.116 | 0.053 | 5.72E-46 | NK cells | DTX3     |
| 12127 | DPM2.2    | 3.14E-50 | 0.339462 | 0.261 | 0.163 | 5.89E-46 | NK cells | DPM2     |
| 12128 | TMEM179B  | 3.38E-50 | 0.417835 | 0.458 | 0.357 | 6.35E-46 | NK cells | TMEM179B |
| 12129 | COMMD5    | 3.46E-50 | 0.340411 | 0.227 | 0.136 | 6.49E-46 | NK cells | COMMD5   |
| 12130 | PPM1G.1   | 5.99E-50 | 0.389734 | 0.453 | 0.357 | 1.13E-45 | NK cells | PPM1G    |
| 12131 | PASK.2    | 6.02E-50 | -0.43952 | 0.036 | 0.125 | 1.13E-45 | NK cells | PASK     |
| 12132 | FDPS.2    | 7.45E-50 | 0.396358 | 0.319 | 0.218 | 1.40E-45 | NK cells | FDPS     |
| 12133 | FAM173A   | 9.88E-50 | 0.405385 | 0.308 | 0.208 | 1.86E-45 | NK cells | FAM173A  |
| 12134 | SLC25A11  | 1.13E-49 | 0.38304  | 0.289 | 0.19  | 2.11E-45 | NK cells | SLC25A11 |
| 12135 | MT-ND1.5  | 1.29E-49 | -0.32566 | 0.782 | 0.866 | 2.42E-45 | NK cells | MT-ND1   |
| 12136 | MT-ND2.5  | 1.75E-49 | -0.31377 | 0.761 | 0.856 | 3.29E-45 | NK cells | MT-ND2   |
| 12137 | MX2.3     | 1.84E-49 | -0.33738 | 0.081 | 0.188 | 3.46E-45 | NK cells | MX2      |
| 12138 | NDUFA1.5  | 1.89E-49 | 0.345438 | 0.676 | 0.618 | 3.56E-45 | NK cells | NDUFA1   |
| 12139 | BRD2.1    | 2.26E-49 | 0.389632 | 0.414 | 0.307 | 4.25E-45 | NK cells | BRD2     |
| 12140 | PDZD11    | 3.09E-49 | 0.285928 | 0.165 | 0.087 | 5.80E-45 | NK cells | PDZD11   |
| 12141 | OVCA2.1   | 3.97E-49 | 0.366939 | 0.258 | 0.164 | 7.45E-45 | NK cells | OVCA2    |
| 12142 | DERL2.1   | 4.13E-49 | 0.376181 | 0.282 | 0.184 | 7.76E-45 | NK cells | DERL2    |
| 12143 | PA2G4.2   | 5.95E-49 | 0.387247 | 0.531 | 0.449 | 1.12E-44 | NK cells | PA2G4    |
| 12144 | SH3YL1.4  | 6.53E-49 | -0.35768 | 0.094 | 0.204 | 1.23E-44 | NK cells | SH3YL1   |
| 12145 | NDUFA4.4  | 8.61E-49 | 0.309399 | 0.746 | 0.714 | 1.62E-44 | NK cells | NDUFA4   |
| 12146 | ZCCHC17.2 | 1.07E-48 | 0.318376 | 0.191 | 0.108 | 2.00E-44 | NK cells | ZCCHC17  |
| 12147 | GRN.4     | 1.23E-48 | -0.76662 | 0.134 | 0.241 | 2.31E-44 | NK cells | GRN      |
| 12148 | VDAC1.2   | 1.60E-48 | 0.410403 | 0.421 | 0.327 | 3.01E-44 | NK cells | VDAC1    |
| 12149 | DEF6.4    | 1.72E-48 | 0.410633 | 0.435 | 0.335 | 3.22E-44 | NK cells | DEF6     |
| 12150 | SAMD9L    | 2.10E-48 | 0.310441 | 0.192 | 0.109 | 3.94E-44 | NK cells | SAMD9L   |
| 12151 | RABAC1.3  | 2.19E-48 | 0.385172 | 0.56  | 0.463 | 4.11E-44 | NK cells | RABAC1   |
| 12152 | INPP5D.2  | 2.76E-48 | 0.332587 | 0.229 | 0.138 | 5.18E-44 | NK cells | INPP5D   |
| 12153 | CAPN1.3   | 2.83E-48 | 0.347878 | 0.301 | 0.201 | 5.31E-44 | NK cells | CAPN1    |
| 12154 | PITPNC1.3 | 3.58E-48 | 0.370584 | 0.253 | 0.16  | 6.73E-44 | NK cells | PITPNC1  |
| 12155 | UPP1.4    | 4.22E-48 | 0.420616 | 0.292 | 0.195 | 7.92E-44 | NK cells | UPP1     |
| 12156 | BUD31.2   | 4.34E-48 | 0.410624 | 0.385 | 0.284 | 8.15E-44 | NK cells | BUD31    |
| 12157 | CAPZB.5   | 4.83E-48 | 0.311161 | 0.769 | 0.734 | 9.08E-44 | NK cells | CAPZB    |
| 12158 | PPIE.2    | 6.40E-48 | 0.356876 | 0.3   | 0.2   | 1.20E-43 | NK cells | PPIE     |
| 12159 | MZB1.4    | 9.74E-48 | -0.78194 | 0.039 | 0.125 | 1.83E-43 | NK cells | MZB1     |
| 12160 | TRMT1.2   | 1.28E-47 | -0.32802 | 0.136 | 0.255 | 2.40E-43 | NK cells | TRMT1    |
| 12161 | SELENOH.4 | 1.49E-47 | -0.29881 | 0.59  | 0.726 | 2.80E-43 | NK cells | SELENOH  |
| 12162 | GPR174.1  | 1.55E-47 | 0.338769 | 0.167 | 0.09  | 2.92E-43 | NK cells | GPR174   |
| 12163 | ZNF428.4  | 1.58E-47 | 0.409316 | 0.42  | 0.32  | 2.97E-43 | NK cells | ZNF428   |
| 12164 | CELF2.2   | 1.58E-47 | 0.408968 | 0.4   | 0.297 | 2.97E-43 | NK cells | CELF2    |
| 12165 | RPUSD3.1  | 1.90E-47 | 0.350098 | 0.272 | 0.175 | 3.56E-43 | NK cells | RPUSD3   |
| 12166 | GRINA.3   | 2.58E-47 | -0.39855 | 0.143 | 0.262 | 4.85E-43 | NK cells | GRINA    |
| 12167 | LPGAT1.1  | 3.13E-47 | 0.288908 | 0.143 | 0.072 | 5.87E-43 | NK cells | LPGAT1   |
| 12168 | TMEM107   | 3.34E-47 | 0.314675 | 0.158 | 0.084 | 6.28E-43 | NK cells | TMEM107  |
| 12169 | GADD45B   | 4.38E-47 | 0.379204 | 0.259 | 0.164 | 8.22E-43 | NK cells | GADD45B  |

|       |           |          |          |       |       |          |          |          |
|-------|-----------|----------|----------|-------|-------|----------|----------|----------|
| 12170 | WDR45.1   | 5.96E-47 | 0.366728 | 0.252 | 0.16  | 1.12E-42 | NK cells | WDR45    |
| 12171 | PCBD1.2   | 6.84E-47 | 0.286423 | 0.16  | 0.086 | 1.29E-42 | NK cells | PCBD1    |
| 12172 | COMMD8.   | 6.86E-47 | 0.362728 | 0.301 | 0.202 | 1.29E-42 | NK cells | COMMD8   |
| 12173 | C4orf48.5 | 7.39E-47 | -0.40507 | 0.187 | 0.309 | 1.39E-42 | NK cells | C4orf48  |
| 12174 | HYOU1.1   | 7.62E-47 | 0.262824 | 0.111 | 0.051 | 1.43E-42 | NK cells | HYOU1    |
| 12175 | APEX1.4   | 7.98E-47 | -0.32257 | 0.354 | 0.491 | 1.50E-42 | NK cells | APEX1    |
| 12176 | SET.5     | 8.96E-47 | 0.411909 | 0.474 | 0.382 | 1.68E-42 | NK cells | SET      |
| 12177 | RPS29.4   | 1.15E-46 | -0.32698 | 0.768 | 0.835 | 2.16E-42 | NK cells | RPS29    |
| 12178 | RPN1.2    | 1.16E-46 | 0.381624 | 0.452 | 0.355 | 2.17E-42 | NK cells | RPN1     |
| 12179 | ATP5ME.2  | 1.53E-46 | 0.431764 | 0.62  | 0.541 | 2.86E-42 | NK cells | ATP5ME   |
| 12180 | MLLT6     | 1.56E-46 | 0.31074  | 0.172 | 0.095 | 2.93E-42 | NK cells | MLLT6    |
| 12181 | HELZ      | 2.04E-46 | 0.335486 | 0.205 | 0.12  | 3.82E-42 | NK cells | HELZ     |
| 12182 | PLEKHF2.5 | 2.08E-46 | -0.37157 | 0.078 | 0.178 | 3.92E-42 | NK cells | PLEKHF2  |
| 12183 | LTA4H.5   | 2.29E-46 | -0.40031 | 0.233 | 0.357 | 4.31E-42 | NK cells | LTA4H    |
| 12184 | SNRPG.3   | 2.82E-46 | 0.402383 | 0.576 | 0.516 | 5.29E-42 | NK cells | SNRPG    |
| 12185 | CCDC88C.1 | 3.44E-46 | 0.351949 | 0.213 | 0.128 | 6.46E-42 | NK cells | CCDC88C  |
| 12186 | STK17A.4  | 4.52E-46 | 0.371835 | 0.514 | 0.407 | 8.50E-42 | NK cells | STK17A   |
| 12187 | TOMM5.2   | 5.19E-46 | 0.382952 | 0.462 | 0.367 | 9.75E-42 | NK cells | TOMM5    |
| 12188 | BNIP3L.3  | 6.49E-46 | -0.33212 | 0.193 | 0.32  | 1.22E-41 | NK cells | BNIP3L   |
| 12189 | RSU1.2    | 7.27E-46 | 0.352565 | 0.34  | 0.24  | 1.36E-41 | NK cells | RSU1     |
| 12190 | C19orf12  | 7.81E-46 | 0.284239 | 0.143 | 0.073 | 1.47E-41 | NK cells | C19orf12 |
| 12191 | B3GALT4   | 1.34E-45 | 0.306946 | 0.17  | 0.094 | 2.51E-41 | NK cells | B3GALT4  |
| 12192 | PPP2R1A.2 | 1.51E-45 | 0.358589 | 0.545 | 0.463 | 2.84E-41 | NK cells | PPP2R1A  |
| 12193 | PRNP      | 1.73E-45 | 0.350881 | 0.212 | 0.128 | 3.25E-41 | NK cells | PRNP     |
| 12194 | TUBA1B.5  | 2.23E-45 | 0.941428 | 0.562 | 0.514 | 4.18E-41 | NK cells | TUBA1B   |
| 12195 | TAPBPL.1  | 2.49E-45 | 0.37152  | 0.221 | 0.136 | 4.68E-41 | NK cells | TAPBPL   |
| 12196 | PIK3R5    | 2.97E-45 | 0.339691 | 0.181 | 0.104 | 5.58E-41 | NK cells | PIK3R5   |
| 12197 | LCK.5     | 2.97E-45 | 0.273488 | 0.696 | 0.548 | 5.59E-41 | NK cells | LCK      |
| 12198 | FCGR2B.4  | 3.30E-45 | -0.31032 | 0.027 | 0.107 | 6.20E-41 | NK cells | FCGR2B   |
| 12199 | MRPS12.1  | 3.39E-45 | 0.372796 | 0.344 | 0.246 | 6.37E-41 | NK cells | MRPS12   |
| 12200 | OTUB1.1   | 3.54E-45 | 0.367897 | 0.579 | 0.503 | 6.64E-41 | NK cells | OTUB1    |
| 12201 | SH3BP2.3  | 4.51E-45 | 0.306082 | 0.193 | 0.111 | 8.48E-41 | NK cells | SH3BP2   |
| 12202 | FAM50A.2  | 4.83E-45 | 0.368599 | 0.312 | 0.215 | 9.08E-41 | NK cells | FAM50A   |
| 12203 | IER3IP1.1 | 4.94E-45 | 0.348573 | 0.205 | 0.123 | 9.29E-41 | NK cells | IER3IP1  |
| 12204 | NDUFA3.3  | 6.37E-45 | 0.381756 | 0.63  | 0.557 | 1.20E-40 | NK cells | NDUFA3   |
| 12205 | PRKACB.1  | 8.76E-45 | 0.373618 | 0.346 | 0.244 | 1.64E-40 | NK cells | PRKACB   |
| 12206 | HCLS1.5   | 1.04E-44 | 0.322382 | 0.711 | 0.662 | 1.96E-40 | NK cells | HCLS1    |
| 12207 | H2AFV.5   | 1.39E-44 | 0.509232 | 0.43  | 0.355 | 2.62E-40 | NK cells | H2AFV    |
| 12208 | NFKBIB    | 2.20E-44 | 0.265939 | 0.147 | 0.077 | 4.14E-40 | NK cells | NFKBIB   |
| 12209 | CKS2.2    | 2.29E-44 | 0.28941  | 0.155 | 0.083 | 4.30E-40 | NK cells | CKS2     |
| 12210 | SH3KBP1.3 | 2.92E-44 | 0.380799 | 0.372 | 0.274 | 5.48E-40 | NK cells | SH3KBP1  |
| 12211 | NRBP1.2   | 4.08E-44 | 0.383251 | 0.358 | 0.262 | 7.67E-40 | NK cells | NRBP1    |
| 12212 | ABLIM1.5  | 4.49E-44 | -0.36773 | 0.167 | 0.282 | 8.43E-40 | NK cells | ABLIM1   |
| 12213 | ARID5A.3  | 4.53E-44 | 0.353648 | 0.275 | 0.182 | 8.51E-40 | NK cells | ARID5A   |
| 12214 | TMEM106C  | 4.65E-44 | 0.300865 | 0.173 | 0.097 | 8.74E-40 | NK cells | TMEM106C |
| 12215 | LGALS3BP. | 7.26E-44 | -0.29054 | 0.033 | 0.113 | 1.36E-39 | NK cells | LGALS3BP |
| 12216 | SLC35B2   | 7.40E-44 | 0.289574 | 0.176 | 0.099 | 1.39E-39 | NK cells | SLC35B2  |

|       |            |          |          |       |       |          |          |           |
|-------|------------|----------|----------|-------|-------|----------|----------|-----------|
| 12217 | DAPP1.2    | 9.42E-44 | -0.30404 | 0.027 | 0.103 | 1.77E-39 | NK cells | DAPP1     |
| 12218 | MCRIP1.2   | 1.04E-43 | 0.353808 | 0.325 | 0.226 | 1.95E-39 | NK cells | MCRIP1    |
| 12219 | C17orf49.1 | 1.29E-43 | 0.366914 | 0.289 | 0.196 | 2.42E-39 | NK cells | C17orf49  |
| 12220 | OCIAD2.2   | 1.37E-43 | -0.34539 | 0.313 | 0.437 | 2.57E-39 | NK cells | OCIAD2    |
| 12221 | DCXR.3     | 1.51E-43 | 0.389819 | 0.498 | 0.411 | 2.83E-39 | NK cells | DCXR      |
| 12222 | C18orf32.1 | 2.15E-43 | 0.374458 | 0.26  | 0.172 | 4.05E-39 | NK cells | C18orf32  |
| 12223 | ELP6.1     | 4.33E-43 | 0.282171 | 0.182 | 0.104 | 8.13E-39 | NK cells | ELP6      |
| 12224 | SNX9.3     | 4.34E-43 | -0.29459 | 0.035 | 0.115 | 8.16E-39 | NK cells | SNX9      |
| 12225 | VAMP2.3    | 4.55E-43 | 0.368465 | 0.492 | 0.398 | 8.55E-39 | NK cells | VAMP2     |
| 12226 | RCBTB2.1   | 5.17E-43 | 0.30576  | 0.113 | 0.055 | 9.72E-39 | NK cells | RCBTB2    |
| 12227 | SPSB3.2    | 5.35E-43 | 0.369197 | 0.5   | 0.407 | 1.01E-38 | NK cells | SPSB3     |
| 12228 | GRAP.3     | 6.09E-43 | -0.30109 | 0.033 | 0.112 | 1.14E-38 | NK cells | GRAP      |
| 12229 | LYPLA2.1   | 6.66E-43 | 0.361047 | 0.32  | 0.226 | 1.25E-38 | NK cells | LYPLA2    |
| 12230 | CIAO1.1    | 7.54E-43 | 0.346637 | 0.269 | 0.179 | 1.42E-38 | NK cells | CIAO1     |
| 12231 | RNF141.4   | 9.84E-43 | -0.34755 | 0.07  | 0.161 | 1.85E-38 | NK cells | RNF141    |
| 12232 | SAMD9.2    | 1.19E-42 | 0.371791 | 0.239 | 0.152 | 2.23E-38 | NK cells | SAMD9     |
| 12233 | CHI3L2.3   | 1.53E-42 | -0.39132 | 0.071 | 0.162 | 2.87E-38 | NK cells | CHI3L2    |
| 12234 | PIM3.2     | 1.92E-42 | -0.32673 | 0.088 | 0.185 | 3.60E-38 | NK cells | PIM3      |
| 12235 | PIGS       | 2.45E-42 | 0.279499 | 0.189 | 0.111 | 4.60E-38 | NK cells | PIGS      |
| 12236 | ATP5F1C.3  | 2.67E-42 | 0.332814 | 0.589 | 0.532 | 5.01E-38 | NK cells | ATP5F1C   |
| 12237 | MCRS1.1    | 2.71E-42 | 0.339474 | 0.272 | 0.181 | 5.08E-38 | NK cells | MCRS1     |
| 12238 | STK26.2    | 5.29E-42 | 0.32603  | 0.2   | 0.12  | 9.94E-38 | NK cells | STK26     |
| 12239 | GATAD2A    | 5.45E-42 | 0.27825  | 0.131 | 0.067 | 1.02E-37 | NK cells | GATAD2A   |
| 12240 | EMB.2      | 5.52E-42 | 0.340186 | 0.305 | 0.208 | 1.04E-37 | NK cells | EMB       |
| 12241 | TOR2A      | 5.84E-42 | 0.283902 | 0.156 | 0.086 | 1.10E-37 | NK cells | TOR2A     |
| 12242 | DYNLRB1.2  | 7.97E-42 | 0.372422 | 0.485 | 0.397 | 1.50E-37 | NK cells | DYNLRB1   |
| 12243 | SESN3.1    | 9.02E-42 | -0.28477 | 0.028 | 0.103 | 1.69E-37 | NK cells | SESN3     |
| 12244 | ARL5A.1    | 9.20E-42 | 0.333222 | 0.366 | 0.269 | 1.73E-37 | NK cells | ARL5A     |
| 12245 | LINC02446  | 9.70E-42 | -0.73763 | 0.054 | 0.139 | 1.82E-37 | NK cells | LINC02446 |
| 12246 | TMX1.1     | 1.04E-41 | 0.344606 | 0.308 | 0.215 | 1.96E-37 | NK cells | TMX1      |
| 12247 | B3GAT3     | 1.23E-41 | 0.352946 | 0.27  | 0.18  | 2.32E-37 | NK cells | B3GAT3    |
| 12248 | DNAJC8.2   | 1.29E-41 | 0.372035 | 0.483 | 0.396 | 2.41E-37 | NK cells | DNAJC8    |
| 12249 | UBE2Q2     | 1.39E-41 | 0.293726 | 0.167 | 0.094 | 2.61E-37 | NK cells | UBE2Q2    |
| 12250 | GOLGA7.3   | 1.49E-41 | 0.359066 | 0.367 | 0.272 | 2.80E-37 | NK cells | GOLGA7    |
| 12251 | PSMD14.2   | 1.90E-41 | 0.306339 | 0.216 | 0.133 | 3.57E-37 | NK cells | PSMD14    |
| 12252 | RTN4.5     | 1.94E-41 | 0.389342 | 0.38  | 0.286 | 3.65E-37 | NK cells | RTN4      |
| 12253 | HSPA8.5    | 2.14E-41 | 0.258174 | 0.903 | 0.863 | 4.03E-37 | NK cells | HSPA8     |
| 12254 | MAP2K3.2   | 4.50E-41 | 0.331468 | 0.307 | 0.214 | 8.45E-37 | NK cells | MAP2K3    |
| 12255 | BTN3A1.2   | 5.41E-41 | 0.312655 | 0.181 | 0.107 | 1.02E-36 | NK cells | BTN3A1    |
| 12256 | MTHFD2.3   | 7.32E-41 | 0.33785  | 0.211 | 0.131 | 1.37E-36 | NK cells | MTHFD2    |
| 12257 | BUB3.2     | 8.95E-41 | 0.347572 | 0.52  | 0.441 | 1.68E-36 | NK cells | BUB3      |
| 12258 | TERF2IP.1  | 1.00E-40 | 0.365298 | 0.416 | 0.323 | 1.89E-36 | NK cells | TERF2IP   |
| 12259 | COX6C.3    | 1.05E-40 | 0.267789 | 0.798 | 0.766 | 1.96E-36 | NK cells | COX6C     |
| 12260 | ZNHIT1.3   | 1.25E-40 | 0.37898  | 0.436 | 0.343 | 2.36E-36 | NK cells | ZNHIT1    |
| 12261 | POLR2E.1   | 1.53E-40 | 0.350743 | 0.442 | 0.352 | 2.88E-36 | NK cells | POLR2E    |
| 12262 | COPS6.1    | 1.63E-40 | 0.369945 | 0.428 | 0.339 | 3.06E-36 | NK cells | COPS6     |
| 12263 | TINF2.3    | 1.71E-40 | 0.375832 | 0.351 | 0.26  | 3.21E-36 | NK cells | TINF2     |

|       |           |          |          |       |       |          |          |         |
|-------|-----------|----------|----------|-------|-------|----------|----------|---------|
| 12264 | TOMM20.1  | 1.74E-40 | -0.28345 | 0.343 | 0.472 | 3.26E-36 | NK cells | TOMM20  |
| 12265 | MAPRE1.1  | 2.43E-40 | 0.36285  | 0.281 | 0.193 | 4.57E-36 | NK cells | MAPRE1  |
| 12266 | MPPE1.1   | 3.30E-40 | 0.31262  | 0.22  | 0.138 | 6.20E-36 | NK cells | MPPE1   |
| 12267 | RNF126.2  | 5.03E-40 | 0.356876 | 0.306 | 0.216 | 9.45E-36 | NK cells | RNF126  |
| 12268 | MLEC.2    | 5.11E-40 | 0.281227 | 0.204 | 0.124 | 9.60E-36 | NK cells | MLEC    |
| 12269 | PCNA.1    | 5.84E-40 | 0.315575 | 0.169 | 0.097 | 1.10E-35 | NK cells | PCNA    |
| 12270 | LPP       | 6.15E-40 | 0.300292 | 0.16  | 0.091 | 1.15E-35 | NK cells | LPP     |
| 12271 | FBXO7.3   | 6.53E-40 | 0.332998 | 0.345 | 0.252 | 1.23E-35 | NK cells | FBXO7   |
| 12272 | UNC50.1   | 6.74E-40 | 0.371682 | 0.245 | 0.162 | 1.27E-35 | NK cells | UNC50   |
| 12273 | UTP11     | 7.25E-40 | 0.250063 | 0.151 | 0.083 | 1.36E-35 | NK cells | UTP11   |
| 12274 | CMTM6.3   | 1.02E-39 | 0.347341 | 0.417 | 0.319 | 1.91E-35 | NK cells | CMTM6   |
| 12275 | SELENOM.  | 1.85E-39 | -0.2594  | 0.033 | 0.108 | 3.47E-35 | NK cells | SELENOM |
| 12276 | NUAK2.4   | 2.22E-39 | -0.29209 | 0.057 | 0.142 | 4.17E-35 | NK cells | NUAK2   |
| 12277 | EHD1.2    | 2.28E-39 | 0.32798  | 0.258 | 0.171 | 4.28E-35 | NK cells | EHD1    |
| 12278 | PBDC1.1   | 2.85E-39 | 0.321972 | 0.255 | 0.169 | 5.35E-35 | NK cells | PBDC1   |
| 12279 | SLAMF6.2  | 3.10E-39 | 0.275035 | 0.165 | 0.093 | 5.83E-35 | NK cells | SLAMF6  |
| 12280 | RNF181.2  | 3.95E-39 | 0.362713 | 0.439 | 0.347 | 7.41E-35 | NK cells | RNF181  |
| 12281 | PKM.4     | 4.02E-39 | -0.30625 | 0.489 | 0.622 | 7.55E-35 | NK cells | PKM     |
| 12282 | UBE2A.1   | 4.70E-39 | 0.309964 | 0.308 | 0.216 | 8.82E-35 | NK cells | UBE2A   |
| 12283 | PSMD13.1  | 5.05E-39 | 0.341886 | 0.43  | 0.344 | 9.49E-35 | NK cells | PSMD13  |
| 12284 | AKR7A2.1  | 5.32E-39 | 0.337045 | 0.331 | 0.239 | 1.00E-34 | NK cells | AKR7A2  |
| 12285 | ATP6AP2.2 | 5.39E-39 | 0.352807 | 0.469 | 0.384 | 1.01E-34 | NK cells | ATP6AP2 |
| 12286 | RPL27A.3  | 6.23E-39 | -0.2789  | 0.548 | 0.668 | 1.17E-34 | NK cells | RPL27A  |
| 12287 | MESD.2    | 6.74E-39 | 0.345701 | 0.324 | 0.234 | 1.27E-34 | NK cells | MESD    |
| 12288 | TECR.4    | 7.01E-39 | 0.390813 | 0.51  | 0.438 | 1.32E-34 | NK cells | TECR    |
| 12289 | SLC52A2.2 | 1.03E-38 | 0.316913 | 0.194 | 0.119 | 1.93E-34 | NK cells | SLC52A2 |
| 12290 | TIMM17A.  | 1.28E-38 | 0.287981 | 0.225 | 0.143 | 2.41E-34 | NK cells | TIMM17A |
| 12291 | CPT1A.1   | 1.47E-38 | 0.275715 | 0.132 | 0.07  | 2.77E-34 | NK cells | CPT1A   |
| 12292 | STN1      | 1.51E-38 | 0.299923 | 0.193 | 0.117 | 2.84E-34 | NK cells | STN1    |
| 12293 | CDC37.2   | 1.58E-38 | 0.308893 | 0.649 | 0.592 | 2.97E-34 | NK cells | CDC37   |
| 12294 | PTPRCAP.3 | 1.93E-38 | 0.405951 | 0.568 | 0.473 | 3.63E-34 | NK cells | PTPRCAP |
| 12295 | SNX29.2   | 2.30E-38 | -0.30309 | 0.046 | 0.124 | 4.32E-34 | NK cells | SNX29   |
| 12296 | LY9.3     | 2.43E-38 | -0.29365 | 0.104 | 0.201 | 4.57E-34 | NK cells | LY9     |
| 12297 | CDK17     | 2.45E-38 | 0.269614 | 0.155 | 0.087 | 4.60E-34 | NK cells | CDK17   |
| 12298 | EIF4B.3   | 2.61E-38 | -0.28399 | 0.464 | 0.585 | 4.90E-34 | NK cells | EIF4B   |
| 12299 | SSR2.4    | 3.88E-38 | 0.265184 | 0.777 | 0.738 | 7.28E-34 | NK cells | SSR2    |
| 12300 | DECR1.1   | 6.20E-38 | 0.363226 | 0.41  | 0.325 | 1.16E-33 | NK cells | DECR1   |
| 12301 | MECP2.1   | 6.37E-38 | 0.287704 | 0.202 | 0.124 | 1.20E-33 | NK cells | MECP2   |
| 12302 | FIBP.1    | 6.66E-38 | 0.35836  | 0.347 | 0.258 | 1.25E-33 | NK cells | FIBP    |
| 12303 | NARF      | 7.67E-38 | 0.301371 | 0.266 | 0.18  | 1.44E-33 | NK cells | NARF    |
| 12304 | DCAF5.2   | 8.00E-38 | 0.298621 | 0.181 | 0.109 | 1.50E-33 | NK cells | DCAF5   |
| 12305 | ADD1.3    | 8.83E-38 | 0.32092  | 0.264 | 0.177 | 1.66E-33 | NK cells | ADD1    |
| 12306 | CCDC124   | 1.09E-37 | 0.345815 | 0.325 | 0.238 | 2.05E-33 | NK cells | CCDC124 |
| 12307 | SKP1.2    | 1.15E-37 | 0.255658 | 0.817 | 0.799 | 2.16E-33 | NK cells | SKP1    |
| 12308 | TMEM35B   | 1.16E-37 | 0.321974 | 0.256 | 0.171 | 2.18E-33 | NK cells | TMEM35B |
| 12309 | CRYZ      | 1.20E-37 | 0.27683  | 0.162 | 0.093 | 2.25E-33 | NK cells | CRYZ    |
| 12310 | OSTC.4    | 1.22E-37 | 0.327067 | 0.512 | 0.428 | 2.29E-33 | NK cells | OSTC    |

|       |           |          |          |       |       |          |          |         |
|-------|-----------|----------|----------|-------|-------|----------|----------|---------|
| 12311 | MRPL51.2  | 1.44E-37 | 0.368546 | 0.436 | 0.364 | 2.70E-33 | NK cells | MRPL51  |
| 12312 | RRBP1.2   | 1.46E-37 | 0.26866  | 0.148 | 0.082 | 2.73E-33 | NK cells | RRBP1   |
| 12313 | NAXE.2    | 1.69E-37 | 0.363491 | 0.36  | 0.272 | 3.17E-33 | NK cells | NAXE    |
| 12314 | PRKCQ.3   | 2.03E-37 | 0.255809 | 0.166 | 0.096 | 3.81E-33 | NK cells | PRKCQ   |
| 12315 | UCP2.6    | 2.10E-37 | 0.258343 | 0.815 | 0.777 | 3.95E-33 | NK cells | UCP2    |
| 12316 | CSK.6     | 2.12E-37 | 0.298792 | 0.577 | 0.496 | 3.99E-33 | NK cells | CSK     |
| 12317 | MFSD10.2  | 3.27E-37 | 0.360944 | 0.367 | 0.278 | 6.14E-33 | NK cells | MFSD10  |
| 12318 | IAH1.3    | 3.72E-37 | 0.325062 | 0.322 | 0.233 | 6.99E-33 | NK cells | IAH1    |
| 12319 | NCL.2     | 3.76E-37 | 0.276612 | 0.752 | 0.727 | 7.06E-33 | NK cells | NCL     |
| 12320 | GUSB.2    | 4.40E-37 | 0.29063  | 0.228 | 0.148 | 8.26E-33 | NK cells | GUSB    |
| 12321 | CHMP1A    | 4.44E-37 | 0.272941 | 0.209 | 0.131 | 8.34E-33 | NK cells | CHMP1A  |
| 12322 | TROVE2.1  | 4.70E-37 | 0.334166 | 0.278 | 0.193 | 8.83E-33 | NK cells | TROVE2  |
| 12323 | ERG28.3   | 5.98E-37 | 0.28725  | 0.218 | 0.138 | 1.12E-32 | NK cells | ERG28   |
| 12324 | FLOT1.3   | 8.16E-37 | 0.352683 | 0.369 | 0.282 | 1.53E-32 | NK cells | FLOT1   |
| 12325 | SEC62.2   | 8.28E-37 | -0.30066 | 0.408 | 0.533 | 1.56E-32 | NK cells | SEC62   |
| 12326 | LMF2      | 9.16E-37 | 0.297007 | 0.229 | 0.149 | 1.72E-32 | NK cells | LMF2    |
| 12327 | ITCH      | 9.65E-37 | 0.303447 | 0.162 | 0.094 | 1.81E-32 | NK cells | ITCH    |
| 12328 | RNPS1.4   | 1.12E-36 | 0.350402 | 0.512 | 0.445 | 2.11E-32 | NK cells | RNPS1   |
| 12329 | GLRX.4    | 1.13E-36 | 0.32129  | 0.447 | 0.354 | 2.11E-32 | NK cells | GLRX    |
| 12330 | FPGS.2    | 1.17E-36 | 0.297735 | 0.24  | 0.159 | 2.19E-32 | NK cells | FPGS    |
| 12331 | POP4.1    | 1.22E-36 | 0.299792 | 0.24  | 0.158 | 2.28E-32 | NK cells | POP4    |
| 12332 | KPNA2.1   | 1.27E-36 | 0.261105 | 0.139 | 0.077 | 2.38E-32 | NK cells | KPNA2   |
| 12333 | MGMT      | 1.85E-36 | 0.341511 | 0.315 | 0.229 | 3.47E-32 | NK cells | MGMT    |
| 12334 | REEP5.6   | 2.44E-36 | 0.327474 | 0.416 | 0.321 | 4.59E-32 | NK cells | REEP5   |
| 12335 | SERBP1.2  | 2.44E-36 | 0.322291 | 0.622 | 0.577 | 4.59E-32 | NK cells | SERBP1  |
| 12336 | ICAM3.2   | 2.77E-36 | 0.313047 | 0.661 | 0.606 | 5.20E-32 | NK cells | ICAM3   |
| 12337 | SNAP29.3  | 3.74E-36 | 0.283767 | 0.198 | 0.123 | 7.03E-32 | NK cells | SNAP29  |
| 12338 | SNX6.1    | 4.13E-36 | 0.339564 | 0.486 | 0.407 | 7.76E-32 | NK cells | SNX6    |
| 12339 | ABCF1     | 4.31E-36 | 0.296832 | 0.223 | 0.144 | 8.10E-32 | NK cells | ABCF1   |
| 12340 | SRA1.2    | 4.96E-36 | 0.310752 | 0.303 | 0.216 | 9.31E-32 | NK cells | SRA1    |
| 12341 | ITGA6.4   | 5.21E-36 | -0.27819 | 0.049 | 0.124 | 9.79E-32 | NK cells | ITGA6   |
| 12342 | ICAM2.4   | 5.22E-36 | 0.375353 | 0.461 | 0.383 | 9.80E-32 | NK cells | ICAM2   |
| 12343 | DNAJB14.2 | 5.93E-36 | 0.317919 | 0.231 | 0.152 | 1.11E-31 | NK cells | DNAJB14 |
| 12344 | RASSF2.2  | 6.25E-36 | -0.26124 | 0.036 | 0.105 | 1.17E-31 | NK cells | RASSF2  |
| 12345 | CTSZ.2    | 6.52E-36 | -0.26547 | 0.039 | 0.111 | 1.22E-31 | NK cells | CTSZ    |
| 12346 | SYAP1     | 7.15E-36 | 0.295004 | 0.215 | 0.137 | 1.34E-31 | NK cells | SYAP1   |
| 12347 | EMC7.2    | 7.97E-36 | 0.324374 | 0.321 | 0.235 | 1.50E-31 | NK cells | EMC7    |
| 12348 | SLA.2     | 8.74E-36 | 0.317521 | 0.213 | 0.137 | 1.64E-31 | NK cells | SLA     |
| 12349 | ZNF581.3  | 9.20E-36 | -0.27622 | 0.098 | 0.189 | 1.73E-31 | NK cells | ZNF581  |
| 12350 | CHMP2A.2  | 1.08E-35 | 0.345334 | 0.338 | 0.252 | 2.03E-31 | NK cells | CHMP2A  |
| 12351 | RAB6A.1   | 1.10E-35 | 0.324779 | 0.268 | 0.186 | 2.06E-31 | NK cells | RAB6A   |
| 12352 | LMAN1.3   | 1.10E-35 | 0.27691  | 0.275 | 0.187 | 2.07E-31 | NK cells | LMAN1   |
| 12353 | TSPAN14.2 | 1.11E-35 | 0.332567 | 0.332 | 0.245 | 2.09E-31 | NK cells | TSPAN14 |
| 12354 | UBE2I.1   | 1.28E-35 | 0.293374 | 0.617 | 0.566 | 2.41E-31 | NK cells | UBE2I   |
| 12355 | RBM3.2    | 1.28E-35 | 0.383443 | 0.617 | 0.58  | 2.41E-31 | NK cells | RBM3    |
| 12356 | AGTPBP1.4 | 1.29E-35 | 0.303431 | 0.179 | 0.109 | 2.43E-31 | NK cells | AGTPBP1 |
| 12357 | ACADVL.3  | 1.34E-35 | 0.351404 | 0.399 | 0.315 | 2.51E-31 | NK cells | ACADVL  |



|       |            |          |          |       |       |          |          |            |
|-------|------------|----------|----------|-------|-------|----------|----------|------------|
| 12358 | LRPAP1.4   | 1.46E-35 | 0.331397 | 0.36  | 0.272 | 2.75E-31 | NK cells | LRPAP1     |
| 12359 | ARRB2.5    | 1.59E-35 | 0.279343 | 0.504 | 0.403 | 2.98E-31 | NK cells | ARRB2      |
| 12360 | ATP6AP1.1  | 1.59E-35 | 0.347637 | 0.303 | 0.22  | 2.99E-31 | NK cells | ATP6AP1    |
| 12361 | ATP6V0D1   | 1.63E-35 | 0.290654 | 0.412 | 0.313 | 3.06E-31 | NK cells | ATP6V0D1   |
| 12362 | ATP6V1D    | 1.72E-35 | 0.266318 | 0.173 | 0.103 | 3.23E-31 | NK cells | ATP6V1D    |
| 12363 | CD6.5      | 2.15E-35 | -0.3128  | 0.127 | 0.222 | 4.04E-31 | NK cells | CD6        |
| 12364 | PPT1.4     | 2.46E-35 | -0.29523 | 0.146 | 0.243 | 4.62E-31 | NK cells | PPT1       |
| 12365 | NME4.3     | 3.06E-35 | -0.25758 | 0.106 | 0.199 | 5.75E-31 | NK cells | NME4       |
| 12366 | FTH1.5     | 3.66E-35 | -0.7375  | 0.957 | 0.983 | 6.87E-31 | NK cells | FTH1       |
| 12367 | NCK1.1     | 3.85E-35 | 0.310886 | 0.237 | 0.157 | 7.24E-31 | NK cells | NCK1       |
| 12368 | BORCS6     | 3.91E-35 | 0.291295 | 0.174 | 0.105 | 7.34E-31 | NK cells | BORCS6     |
| 12369 | RAB7A.2    | 4.02E-35 | 0.327674 | 0.506 | 0.428 | 7.55E-31 | NK cells | RAB7A      |
| 12370 | SAP18.2    | 5.08E-35 | 0.286513 | 0.668 | 0.634 | 9.54E-31 | NK cells | SAP18      |
| 12371 | TAPBP.1    | 5.30E-35 | 0.357435 | 0.459 | 0.375 | 9.96E-31 | NK cells | TAPBP      |
| 12372 | CRELD1.2   | 5.96E-35 | 0.316554 | 0.177 | 0.108 | 1.12E-30 | NK cells | CRELD1     |
| 12373 | ARHGEF1.5  | 6.08E-35 | 0.324974 | 0.614 | 0.551 | 1.14E-30 | NK cells | ARHGEF1    |
| 12374 | NDUFC2.2   | 6.23E-35 | 0.326049 | 0.288 | 0.204 | 1.17E-30 | NK cells | NDUFC2     |
| 12375 | HNRNPUL1   | 6.33E-35 | 0.315318 | 0.316 | 0.229 | 1.19E-30 | NK cells | HNRNPUL1   |
| 12376 | CEMIP2     | 8.86E-35 | 0.276887 | 0.157 | 0.091 | 1.66E-30 | NK cells | CEMIP2     |
| 12377 | STK17B.3   | 9.56E-35 | -0.25971 | 0.267 | 0.387 | 1.80E-30 | NK cells | STK17B     |
| 12378 | ZYX.5      | 1.06E-34 | 0.266239 | 0.486 | 0.388 | 1.99E-30 | NK cells | ZYX        |
| 12379 | FMNL1.5    | 1.07E-34 | 0.352279 | 0.263 | 0.182 | 2.00E-30 | NK cells | FMNL1      |
| 12380 | TMBIM1.2   | 1.22E-34 | 0.329349 | 0.267 | 0.186 | 2.29E-30 | NK cells | TMBIM1     |
| 12381 | TSTA3      | 1.33E-34 | 0.319653 | 0.272 | 0.189 | 2.49E-30 | NK cells | TSTA3      |
| 12382 | ITPA       | 1.36E-34 | 0.320891 | 0.275 | 0.193 | 2.56E-30 | NK cells | ITPA       |
| 12383 | LNPEP.1    | 1.38E-34 | 0.376359 | 0.302 | 0.22  | 2.60E-30 | NK cells | LNPEP      |
| 12384 | P2RY10.2   | 1.69E-34 | -0.28454 | 0.048 | 0.12  | 3.17E-30 | NK cells | P2RY10     |
| 12385 | PEBP1.4    | 2.15E-34 | -0.28349 | 0.415 | 0.53  | 4.04E-30 | NK cells | PEBP1      |
| 12386 | RBBP7.2    | 2.31E-34 | 0.340056 | 0.359 | 0.276 | 4.34E-30 | NK cells | RBBP7      |
| 12387 | DDA1       | 2.32E-34 | 0.268715 | 0.202 | 0.128 | 4.37E-30 | NK cells | DDA1       |
| 12388 | WAS.3      | 3.05E-34 | 0.316125 | 0.561 | 0.488 | 5.73E-30 | NK cells | WAS        |
| 12389 | UROS       | 3.22E-34 | 0.282301 | 0.221 | 0.145 | 6.05E-30 | NK cells | UROS       |
| 12390 | RIPOR2.4   | 3.26E-34 | -0.26031 | 0.478 | 0.605 | 6.12E-30 | NK cells | RIPOR2     |
| 12391 | WASHC4.4   | 3.80E-34 | -0.30033 | 0.114 | 0.205 | 7.15E-30 | NK cells | WASHC4     |
| 12392 | EMC6.1     | 7.28E-34 | 0.319786 | 0.349 | 0.265 | 1.37E-29 | NK cells | EMC6       |
| 12393 | IDH3G.1    | 7.34E-34 | 0.309948 | 0.328 | 0.244 | 1.38E-29 | NK cells | IDH3G      |
| 12394 | RPS27L.3   | 7.50E-34 | 0.366692 | 0.484 | 0.411 | 1.41E-29 | NK cells | RPS27L     |
| 12395 | RAB2A.2    | 7.55E-34 | 0.327449 | 0.401 | 0.318 | 1.42E-29 | NK cells | RAB2A      |
| 12396 | FO393401.1 | 9.29E-34 | 0.298993 | 0.128 | 0.071 | 1.75E-29 | NK cells | FO393401.1 |
| 12397 | HIST1H1E.1 | 1.06E-33 | 0.478664 | 0.282 | 0.203 | 2.00E-29 | NK cells | HIST1H1E   |
| 12398 | PSENEN     | 1.20E-33 | 0.335556 | 0.224 | 0.15  | 2.26E-29 | NK cells | PSENEN     |
| 12399 | CORO1B.3   | 1.26E-33 | -0.2971  | 0.212 | 0.322 | 2.37E-29 | NK cells | CORO1B     |
| 12400 | MT-ND5.3   | 1.37E-33 | 0.310273 | 0.747 | 0.713 | 2.58E-29 | NK cells | MT-ND5     |
| 12401 | DCPS.2     | 1.68E-33 | 0.279168 | 0.218 | 0.143 | 3.16E-29 | NK cells | DCPS       |
| 12402 | DYNC1H1.1  | 1.78E-33 | 0.331729 | 0.258 | 0.178 | 3.34E-29 | NK cells | DYNC1H1    |
| 12403 | CMC2.2     | 1.86E-33 | 0.30132  | 0.246 | 0.169 | 3.49E-29 | NK cells | CMC2       |
| 12404 | NAA38.3    | 2.04E-33 | 0.353317 | 0.466 | 0.391 | 3.84E-29 | NK cells | NAA38      |

|       |            |          |          |       |       |          |          |            |
|-------|------------|----------|----------|-------|-------|----------|----------|------------|
| 12405 | EIF4EBP2.1 | 2.09E-33 | 0.297716 | 0.23  | 0.154 | 3.93E-29 | NK cells | EIF4EBP2   |
| 12406 | PSMD2.1    | 2.82E-33 | 0.325159 | 0.357 | 0.276 | 5.29E-29 | NK cells | PSMD2      |
| 12407 | PPIH.2     | 2.89E-33 | 0.321368 | 0.316 | 0.232 | 5.43E-29 | NK cells | PPIH       |
| 12408 | SRSF2.2    | 3.08E-33 | 0.376895 | 0.47  | 0.406 | 5.78E-29 | NK cells | SRSF2      |
| 12409 | CD28.3     | 5.01E-33 | -0.27798 | 0.043 | 0.11  | 9.41E-29 | NK cells | CD28       |
| 12410 | SEC61A1.2  | 5.84E-33 | 0.285957 | 0.236 | 0.159 | 1.10E-28 | NK cells | SEC61A1    |
| 12411 | VTI1B.2    | 6.03E-33 | 0.324798 | 0.312 | 0.23  | 1.13E-28 | NK cells | VTI1B      |
| 12412 | EIF6.1     | 6.47E-33 | 0.346977 | 0.396 | 0.315 | 1.21E-28 | NK cells | EIF6       |
| 12413 | ENSA.3     | 6.52E-33 | 0.340157 | 0.419 | 0.341 | 1.23E-28 | NK cells | ENSA       |
| 12414 | ATF6B.2    | 6.57E-33 | 0.325313 | 0.375 | 0.289 | 1.23E-28 | NK cells | ATF6B      |
| 12415 | PYURF.4    | 7.65E-33 | 0.331435 | 0.497 | 0.426 | 1.44E-28 | NK cells | PYURF      |
| 12416 | MOB2.3     | 7.85E-33 | 0.281108 | 0.237 | 0.16  | 1.47E-28 | NK cells | MOB2       |
| 12417 | SLC25A37.  | 1.05E-32 | -0.46723 | 0.046 | 0.115 | 1.98E-28 | NK cells | SLC25A37   |
| 12418 | KIAA0040.  | 1.17E-32 | -0.3118  | 0.092 | 0.174 | 2.20E-28 | NK cells | KIAA0040   |
| 12419 | ACSL5      | 1.33E-32 | 0.250519 | 0.154 | 0.091 | 2.49E-28 | NK cells | ACSL5      |
| 12420 | GABPB1-A.  | 1.37E-32 | -0.29092 | 0.1   | 0.184 | 2.58E-28 | NK cells | GABPB1-AS1 |
| 12421 | TMED5.2    | 1.41E-32 | 0.323389 | 0.247 | 0.171 | 2.65E-28 | NK cells | TMED5      |
| 12422 | CYFIP2.2   | 1.74E-32 | 0.341687 | 0.406 | 0.322 | 3.27E-28 | NK cells | CYFIP2     |
| 12423 | ZBTB8OS.3  | 1.84E-32 | 0.3298   | 0.285 | 0.205 | 3.45E-28 | NK cells | ZBTB8OS    |
| 12424 | AP2M1.1    | 2.08E-32 | 0.320223 | 0.503 | 0.433 | 3.90E-28 | NK cells | AP2M1      |
| 12425 | TMEM258.   | 2.09E-32 | 0.299512 | 0.669 | 0.633 | 3.93E-28 | NK cells | TMEM258    |
| 12426 | MED30.1    | 2.86E-32 | 0.272007 | 0.246 | 0.167 | 5.38E-28 | NK cells | MED30      |
| 12427 | PPP1R7.1   | 2.92E-32 | 0.330217 | 0.333 | 0.252 | 5.48E-28 | NK cells | PPP1R7     |
| 12428 | SUCLG1.2   | 3.30E-32 | 0.333404 | 0.362 | 0.283 | 6.21E-28 | NK cells | SUCLG1     |
| 12429 | PDLIM2.2   | 3.39E-32 | 0.341395 | 0.334 | 0.252 | 6.36E-28 | NK cells | PDLIM2     |
| 12430 | MCM3.1     | 3.47E-32 | 0.326435 | 0.226 | 0.154 | 6.51E-28 | NK cells | MCM3       |
| 12431 | VPS25.1    | 3.69E-32 | 0.286809 | 0.253 | 0.175 | 6.94E-28 | NK cells | VPS25      |
| 12432 | MPC1.2     | 3.85E-32 | 0.280524 | 0.264 | 0.183 | 7.24E-28 | NK cells | MPC1       |
| 12433 | TGFBR2.3   | 4.04E-32 | -0.27363 | 0.158 | 0.256 | 7.58E-28 | NK cells | TGFBR2     |
| 12434 | PLEC.3     | 4.65E-32 | -0.26747 | 0.068 | 0.143 | 8.73E-28 | NK cells | PLEC       |
| 12435 | LSM3.2     | 4.79E-32 | 0.334896 | 0.394 | 0.32  | 9.01E-28 | NK cells | LSM3       |
| 12436 | HLA-DPB1.  | 4.84E-32 | -1.43496 | 0.455 | 0.454 | 9.10E-28 | NK cells | HLA-DPB1   |
| 12437 | SLC25A3.3  | 4.93E-32 | 0.251529 | 0.741 | 0.72  | 9.27E-28 | NK cells | SLC25A3    |
| 12438 | CCNDBP1.   | 5.22E-32 | 0.305781 | 0.45  | 0.369 | 9.80E-28 | NK cells | CCNDBP1    |
| 12439 | ANXA11.2   | 5.37E-32 | 0.302614 | 0.613 | 0.566 | 1.01E-27 | NK cells | ANXA11     |
| 12440 | MIF4GD.1   | 5.38E-32 | 0.305339 | 0.267 | 0.187 | 1.01E-27 | NK cells | MIF4GD     |
| 12441 | HEXB.2     | 6.82E-32 | 0.276413 | 0.211 | 0.14  | 1.28E-27 | NK cells | HEXB       |
| 12442 | EMD.3      | 7.38E-32 | 0.324536 | 0.464 | 0.391 | 1.39E-27 | NK cells | EMD        |
| 12443 | NDUFB6.3   | 8.41E-32 | 0.321814 | 0.415 | 0.34  | 1.58E-27 | NK cells | NDUFB6     |
| 12444 | ARID5B.3   | 8.90E-32 | -0.33682 | 0.144 | 0.234 | 1.67E-27 | NK cells | ARID5B     |
| 12445 | PCSK7.1    | 9.83E-32 | 0.307894 | 0.233 | 0.159 | 1.85E-27 | NK cells | PCSK7      |
| 12446 | PSMC1.1    | 1.02E-31 | 0.291223 | 0.295 | 0.215 | 1.91E-27 | NK cells | PSMC1      |
| 12447 | MRPL20.1   | 1.02E-31 | 0.338514 | 0.473 | 0.404 | 1.92E-27 | NK cells | MRPL20     |
| 12448 | MAGED2.4   | 1.16E-31 | 0.318597 | 0.294 | 0.215 | 2.17E-27 | NK cells | MAGED2     |
| 12449 | HSPD1.4    | 1.75E-31 | -0.2541  | 0.344 | 0.46  | 3.28E-27 | NK cells | HSPD1      |
| 12450 | PEF1       | 1.80E-31 | 0.283972 | 0.24  | 0.164 | 3.38E-27 | NK cells | PEF1       |
| 12451 | PREB.1     | 2.23E-31 | 0.288925 | 0.24  | 0.163 | 4.19E-27 | NK cells | PREB       |

|       |            |          |          |       |       |          |          |            |
|-------|------------|----------|----------|-------|-------|----------|----------|------------|
| 12452 | PUF60.3    | 2.47E-31 | 0.333638 | 0.454 | 0.385 | 4.63E-27 | NK cells | PUF60      |
| 12453 | HMGNA4.3   | 2.72E-31 | 0.325526 | 0.36  | 0.278 | 5.10E-27 | NK cells | HMGNA4     |
| 12454 | CTSS.4     | 2.90E-31 | -0.78578 | 0.287 | 0.365 | 5.46E-27 | NK cells | CTSS       |
| 12455 | SF3B4.1    | 3.09E-31 | 0.299921 | 0.406 | 0.329 | 5.81E-27 | NK cells | SF3B4      |
| 12456 | ZNF706.2   | 3.60E-31 | -0.2551  | 0.402 | 0.518 | 6.75E-27 | NK cells | ZNF706     |
| 12457 | NDUFA11.1  | 3.75E-31 | 0.326411 | 0.521 | 0.456 | 7.05E-27 | NK cells | NDUFA11    |
| 12458 | SSBP2.5    | 4.24E-31 | -0.28345 | 0.063 | 0.135 | 7.97E-27 | NK cells | SSBP2      |
| 12459 | PSD4.1     | 4.30E-31 | 0.264488 | 0.176 | 0.109 | 8.08E-27 | NK cells | PSD4       |
| 12460 | SNRPD3.1   | 5.72E-31 | 0.307389 | 0.529 | 0.469 | 1.07E-26 | NK cells | SNRPD3     |
| 12461 | TMEM141.1  | 6.33E-31 | 0.299328 | 0.287 | 0.208 | 1.19E-26 | NK cells | TMEM141    |
| 12462 | PPP1R2.3   | 7.27E-31 | -0.25191 | 0.316 | 0.429 | 1.36E-26 | NK cells | PPP1R2     |
| 12463 | EMC3.2     | 7.46E-31 | 0.283884 | 0.263 | 0.185 | 1.40E-26 | NK cells | EMC3       |
| 12464 | CCDC69.2   | 7.76E-31 | 0.316033 | 0.266 | 0.19  | 1.46E-26 | NK cells | CCDC69     |
| 12465 | CCDC12.4   | 8.55E-31 | 0.323324 | 0.367 | 0.286 | 1.61E-26 | NK cells | CCDC12     |
| 12466 | SRP9.3     | 8.90E-31 | 0.280307 | 0.619 | 0.587 | 1.67E-26 | NK cells | SRP9       |
| 12467 | ACTR2.3    | 9.43E-31 | 0.365453 | 0.438 | 0.361 | 1.77E-26 | NK cells | ACTR2      |
| 12468 | MAN1B1     | 9.45E-31 | 0.258316 | 0.154 | 0.093 | 1.78E-26 | NK cells | MAN1B1     |
| 12469 | DDX39A.2   | 1.30E-30 | 0.32578  | 0.403 | 0.331 | 2.44E-26 | NK cells | DDX39A     |
| 12470 | PPP2R5E.1  | 1.36E-30 | 0.283753 | 0.205 | 0.135 | 2.55E-26 | NK cells | PPP2R5E    |
| 12471 | MPC2.1     | 1.61E-30 | 0.279262 | 0.331 | 0.252 | 3.02E-26 | NK cells | MPC2       |
| 12472 | PPP3CC.4   | 1.71E-30 | 0.312242 | 0.314 | 0.232 | 3.20E-26 | NK cells | PPP3CC     |
| 12473 | CLTA.3     | 1.82E-30 | 0.296753 | 0.485 | 0.421 | 3.42E-26 | NK cells | CLTA       |
| 12474 | RBBP4.3    | 1.84E-30 | 0.335398 | 0.41  | 0.336 | 3.46E-26 | NK cells | RBBP4      |
| 12475 | IFT57.3    | 2.10E-30 | -0.29546 | 0.079 | 0.153 | 3.94E-26 | NK cells | IFT57      |
| 12476 | CCPG1.3    | 2.16E-30 | 0.278833 | 0.189 | 0.123 | 4.06E-26 | NK cells | CCPG1      |
| 12477 | ANP32E.2   | 2.61E-30 | 0.336031 | 0.255 | 0.184 | 4.90E-26 | NK cells | ANP32E     |
| 12478 | CTBP1      | 2.71E-30 | 0.292575 | 0.173 | 0.109 | 5.09E-26 | NK cells | CTBP1      |
| 12479 | PSMC5.1    | 4.68E-30 | 0.308743 | 0.492 | 0.43  | 8.79E-26 | NK cells | PSMC5      |
| 12480 | MAP4       | 4.83E-30 | 0.250806 | 0.166 | 0.103 | 9.08E-26 | NK cells | MAP4       |
| 12481 | ABT1.2     | 5.10E-30 | 0.283093 | 0.316 | 0.235 | 9.58E-26 | NK cells | ABT1       |
| 12482 | TRIR.3     | 6.14E-30 | 0.301811 | 0.612 | 0.565 | 1.15E-25 | NK cells | TRIR       |
| 12483 | MTCH2.1    | 6.18E-30 | 0.288128 | 0.275 | 0.2   | 1.16E-25 | NK cells | MTCH2      |
| 12484 | NDUFA2.2   | 7.94E-30 | 0.325937 | 0.49  | 0.429 | 1.49E-25 | NK cells | NDUFA2     |
| 12485 | AC004687.1 | 7.99E-30 | 0.341626 | 0.295 | 0.217 | 1.50E-25 | NK cells | AC004687.1 |
| 12486 | PPP2CA.1   | 9.23E-30 | 0.286902 | 0.368 | 0.289 | 1.73E-25 | NK cells | PPP2CA     |
| 12487 | INPP5K.1   | 1.19E-29 | 0.279662 | 0.226 | 0.155 | 2.23E-25 | NK cells | INPP5K     |
| 12488 | SLBP.2     | 1.25E-29 | 0.348087 | 0.298 | 0.227 | 2.36E-25 | NK cells | SLBP       |
| 12489 | RAB11B.2   | 1.38E-29 | 0.3192   | 0.44  | 0.368 | 2.58E-25 | NK cells | RAB11B     |
| 12490 | SNRPB2.2   | 1.55E-29 | 0.342276 | 0.415 | 0.344 | 2.92E-25 | NK cells | SNRPB2     |
| 12491 | SZRD1      | 1.89E-29 | 0.288421 | 0.271 | 0.196 | 3.54E-25 | NK cells | SZRD1      |
| 12492 | NPTN.4     | 1.99E-29 | 0.28156  | 0.27  | 0.195 | 3.74E-25 | NK cells | NPTN       |
| 12493 | JTB.1      | 2.11E-29 | 0.305594 | 0.525 | 0.461 | 3.96E-25 | NK cells | JTB        |
| 12494 | STX4.1     | 2.12E-29 | 0.291761 | 0.191 | 0.126 | 3.97E-25 | NK cells | STX4       |
| 12495 | ARPP19     | 2.20E-29 | 0.262533 | 0.189 | 0.121 | 4.14E-25 | NK cells | ARPP19     |
| 12496 | NDUFS3.1   | 2.41E-29 | 0.298759 | 0.341 | 0.263 | 4.52E-25 | NK cells | NDUFS3     |
| 12497 | C1D.1      | 2.56E-29 | 0.303189 | 0.365 | 0.287 | 4.81E-25 | NK cells | C1D        |
| 12498 | GHITM.2    | 2.86E-29 | 0.298865 | 0.552 | 0.502 | 5.37E-25 | NK cells | GHITM      |

|       |           |          |          |       |       |          |          |         |
|-------|-----------|----------|----------|-------|-------|----------|----------|---------|
| 12499 | UFD1.2    | 3.00E-29 | 0.308632 | 0.338 | 0.263 | 5.63E-25 | NK cells | UFD1    |
| 12500 | HDAC1.2   | 3.20E-29 | 0.295284 | 0.49  | 0.425 | 6.01E-25 | NK cells | HDAC1   |
| 12501 | AP1M1.2   | 3.21E-29 | 0.299615 | 0.359 | 0.281 | 6.03E-25 | NK cells | AP1M1   |
| 12502 | TMEM208   | 3.38E-29 | 0.294084 | 0.279 | 0.203 | 6.35E-25 | NK cells | TMEM208 |
| 12503 | ERLEC1.2  | 3.41E-29 | 0.285792 | 0.246 | 0.172 | 6.41E-25 | NK cells | ERLEC1  |
| 12504 | GTF3C6.2  | 3.48E-29 | 0.327157 | 0.335 | 0.264 | 6.53E-25 | NK cells | GTF3C6  |
| 12505 | PKN1.3    | 4.86E-29 | 0.306524 | 0.25  | 0.177 | 9.12E-25 | NK cells | PKN1    |
| 12506 | COPS9.4   | 5.65E-29 | 0.359053 | 0.451 | 0.383 | 1.06E-24 | NK cells | COPS9   |
| 12507 | EIF3A.3   | 5.79E-29 | 0.34571  | 0.334 | 0.261 | 1.09E-24 | NK cells | EIF3A   |
| 12508 | PSMD9.1   | 6.47E-29 | 0.296854 | 0.323 | 0.246 | 1.21E-24 | NK cells | PSMD9   |
| 12509 | ERH.2     | 6.48E-29 | 0.285645 | 0.574 | 0.537 | 1.22E-24 | NK cells | ERH     |
| 12510 | SIPA1.2   | 6.93E-29 | 0.288782 | 0.188 | 0.123 | 1.30E-24 | NK cells | SIPA1   |
| 12511 | NCOR1.2   | 7.72E-29 | 0.313672 | 0.454 | 0.384 | 1.45E-24 | NK cells | NCOR1   |
| 12512 | PDAP1.2   | 8.76E-29 | 0.306444 | 0.358 | 0.28  | 1.65E-24 | NK cells | PDAP1   |
| 12513 | NDUFB10.1 | 1.08E-28 | 0.286285 | 0.556 | 0.504 | 2.02E-24 | NK cells | NDUFB10 |
| 12514 | PDLIM1.6  | 1.13E-28 | -0.43509 | 0.114 | 0.188 | 2.11E-24 | NK cells | PDLIM1  |
| 12515 | UBLCP1.3  | 1.71E-28 | 0.324107 | 0.292 | 0.219 | 3.21E-24 | NK cells | UBLCP1  |
| 12516 | GTF2A2.1  | 1.74E-28 | 0.290436 | 0.433 | 0.362 | 3.26E-24 | NK cells | GTF2A2  |
| 12517 | SEC13.2   | 2.12E-28 | 0.291867 | 0.359 | 0.283 | 3.98E-24 | NK cells | SEC13   |
| 12518 | QRSL1.3   | 3.00E-28 | -0.3007  | 0.067 | 0.134 | 5.64E-24 | NK cells | QRSL1   |
| 12519 | UBE2V2.1  | 3.13E-28 | 0.269807 | 0.314 | 0.236 | 5.87E-24 | NK cells | UBE2V2  |
| 12520 | RBM39.1   | 3.60E-28 | 0.294684 | 0.593 | 0.537 | 6.77E-24 | NK cells | RBM39   |
| 12521 | ATG5.1    | 4.26E-28 | 0.270978 | 0.23  | 0.16  | 8.00E-24 | NK cells | ATG5    |
| 12522 | RBCK1.2   | 4.79E-28 | 0.310346 | 0.395 | 0.322 | 8.99E-24 | NK cells | RBCK1   |
| 12523 | RAMMET.1  | 4.91E-28 | 0.285209 | 0.236 | 0.165 | 9.22E-24 | NK cells | RAMMET  |
| 12524 | CCSER2.4  | 4.93E-28 | 0.263136 | 0.185 | 0.12  | 9.26E-24 | NK cells | CCSER2  |
| 12525 | DNM2.3    | 5.52E-28 | 0.260531 | 0.166 | 0.106 | 1.04E-23 | NK cells | DNM2    |
| 12526 | SMAP1.1   | 5.71E-28 | 0.284997 | 0.29  | 0.216 | 1.07E-23 | NK cells | SMAP1   |
| 12527 | BAG1.1    | 6.35E-28 | 0.30091  | 0.275 | 0.201 | 1.19E-23 | NK cells | BAG1    |
| 12528 | FAM107B.1 | 6.83E-28 | 0.337378 | 0.346 | 0.269 | 1.28E-23 | NK cells | FAM107B |
| 12529 | GEMIN7.1  | 7.54E-28 | 0.276038 | 0.202 | 0.135 | 1.42E-23 | NK cells | GEMIN7  |
| 12530 | POLD4.4   | 9.12E-28 | -0.35637 | 0.47  | 0.554 | 1.71E-23 | NK cells | POLD4   |
| 12531 | MSL3.2    | 1.03E-27 | -0.25735 | 0.126 | 0.208 | 1.94E-23 | NK cells | MSL3    |
| 12532 | RBX1.3    | 1.10E-27 | 0.287611 | 0.561 | 0.513 | 2.08E-23 | NK cells | RBX1    |
| 12533 | STRAP.3   | 1.21E-27 | 0.294259 | 0.432 | 0.364 | 2.27E-23 | NK cells | STRAP   |
| 12534 | PHB.3     | 1.29E-27 | 0.304788 | 0.424 | 0.356 | 2.43E-23 | NK cells | PHB     |
| 12535 | SNRPD1.3  | 1.32E-27 | 0.323587 | 0.404 | 0.344 | 2.49E-23 | NK cells | SNRPD1  |
| 12536 | ARF4.2    | 1.52E-27 | 0.288064 | 0.352 | 0.272 | 2.85E-23 | NK cells | ARF4    |
| 12537 | POLR2F.1  | 1.54E-27 | 0.287958 | 0.322 | 0.245 | 2.89E-23 | NK cells | POLR2F  |
| 12538 | TXNDC9    | 1.97E-27 | 0.275591 | 0.257 | 0.184 | 3.70E-23 | NK cells | TXNDC9  |
| 12539 | ZNF207.2  | 2.18E-27 | 0.327462 | 0.393 | 0.322 | 4.10E-23 | NK cells | ZNF207  |
| 12540 | GMCL1     | 2.32E-27 | 0.254219 | 0.191 | 0.126 | 4.36E-23 | NK cells | GMCL1   |
| 12541 | CTSB.4    | 2.95E-27 | -0.3845  | 0.156 | 0.236 | 5.53E-23 | NK cells | CTSB    |
| 12542 | USP34.2   | 3.15E-27 | 0.280911 | 0.214 | 0.147 | 5.92E-23 | NK cells | USP34   |
| 12543 | MGST3.5   | 3.29E-27 | 0.280555 | 0.318 | 0.244 | 6.18E-23 | NK cells | MGST3   |
| 12544 | TBPL1.1   | 3.59E-27 | 0.25096  | 0.228 | 0.158 | 6.75E-23 | NK cells | TBPL1   |
| 12545 | SRSF7.3   | 3.94E-27 | 0.277577 | 0.584 | 0.548 | 7.40E-23 | NK cells | SRSF7   |

|       |           |          |          |       |       |          |          |          |
|-------|-----------|----------|----------|-------|-------|----------|----------|----------|
| 12546 | MYH9.4    | 4.07E-27 | 0.3064   | 0.519 | 0.459 | 7.64E-23 | NK cells | MYH9     |
| 12547 | PDCD6.1   | 4.31E-27 | 0.280013 | 0.548 | 0.489 | 8.10E-23 | NK cells | PDCD6    |
| 12548 | COA3.2    | 5.80E-27 | 0.289294 | 0.323 | 0.247 | 1.09E-22 | NK cells | COA3     |
| 12549 | MRPL28.1  | 6.73E-27 | 0.297707 | 0.285 | 0.212 | 1.26E-22 | NK cells | MRPL28   |
| 12550 | EMC4.2    | 7.08E-27 | 0.303936 | 0.371 | 0.301 | 1.33E-22 | NK cells | EMC4     |
| 12551 | SUPT16H.1 | 8.28E-27 | 0.273369 | 0.259 | 0.187 | 1.56E-22 | NK cells | SUPT16H  |
| 12552 | LBR.1     | 8.45E-27 | 0.31233  | 0.393 | 0.321 | 1.59E-22 | NK cells | LBR      |
| 12553 | SCAND1.2  | 8.55E-27 | 0.299347 | 0.513 | 0.45  | 1.61E-22 | NK cells | SCAND1   |
| 12554 | STK38.3   | 9.04E-27 | 0.330735 | 0.385 | 0.31  | 1.70E-22 | NK cells | STK38    |
| 12555 | RBM42.1   | 9.28E-27 | 0.301789 | 0.338 | 0.266 | 1.74E-22 | NK cells | RBM42    |
| 12556 | MRFAP1L1  | 9.53E-27 | 0.309453 | 0.351 | 0.276 | 1.79E-22 | NK cells | MRFAP1L1 |
| 12557 | MAT2B.3   | 1.09E-26 | 0.272376 | 0.599 | 0.546 | 2.05E-22 | NK cells | MAT2B    |
| 12558 | GPS1      | 1.16E-26 | 0.277553 | 0.281 | 0.209 | 2.17E-22 | NK cells | GPS1     |
| 12559 | XAF1.2    | 1.70E-26 | 0.289859 | 0.241 | 0.171 | 3.19E-22 | NK cells | XAF1     |
| 12560 | XRN1      | 1.85E-26 | 0.307331 | 0.223 | 0.156 | 3.47E-22 | NK cells | XRN1     |
| 12561 | BABAM1    | 1.95E-26 | 0.265184 | 0.22  | 0.153 | 3.65E-22 | NK cells | BABAM1   |
| 12562 | SF3B2.1   | 2.04E-26 | 0.273842 | 0.576 | 0.534 | 3.84E-22 | NK cells | SF3B2    |
| 12563 | STK25     | 2.19E-26 | 0.257582 | 0.213 | 0.146 | 4.11E-22 | NK cells | STK25    |
| 12564 | MEA1.1    | 2.42E-26 | 0.282532 | 0.384 | 0.313 | 4.55E-22 | NK cells | MEA1     |
| 12565 | GPX4.5    | 2.46E-26 | -0.25977 | 0.51  | 0.61  | 4.61E-22 | NK cells | GPX4     |
| 12566 | SOD2.5    | 2.58E-26 | -0.40069 | 0.122 | 0.198 | 4.85E-22 | NK cells | SOD2     |
| 12567 | VPS28.2   | 2.61E-26 | 0.29636  | 0.59  | 0.54  | 4.90E-22 | NK cells | VPS28    |
| 12568 | UQCRFS1.2 | 2.86E-26 | 0.288591 | 0.521 | 0.475 | 5.36E-22 | NK cells | UQCRFS1  |
| 12569 | CSNK1D.2  | 3.51E-26 | 0.287366 | 0.23  | 0.163 | 6.60E-22 | NK cells | CSNK1D   |
| 12570 | NDFIP1.4  | 3.52E-26 | -0.25857 | 0.35  | 0.453 | 6.61E-22 | NK cells | NDFIP1   |
| 12571 | NCOA7.1   | 3.59E-26 | 0.272149 | 0.155 | 0.099 | 6.74E-22 | NK cells | NCOA7    |
| 12572 | RIC8A.1   | 3.92E-26 | 0.263095 | 0.251 | 0.18  | 7.36E-22 | NK cells | RIC8A    |
| 12573 | ARPC1B.4  | 4.01E-26 | 0.28267  | 0.537 | 0.473 | 7.53E-22 | NK cells | ARPC1B   |
| 12574 | PSMD7.1   | 5.05E-26 | 0.275522 | 0.362 | 0.292 | 9.48E-22 | NK cells | PSMD7    |
| 12575 | CD48.5    | 5.44E-26 | 0.314514 | 0.48  | 0.411 | 1.02E-21 | NK cells | CD48     |
| 12576 | NUDT5.2   | 5.68E-26 | 0.273039 | 0.254 | 0.183 | 1.07E-21 | NK cells | NUDT5    |
| 12577 | MOB1A.3   | 7.93E-26 | 0.299283 | 0.393 | 0.318 | 1.49E-21 | NK cells | MOB1A    |
| 12578 | DAXX      | 1.06E-25 | 0.253219 | 0.203 | 0.138 | 1.99E-21 | NK cells | DAXX     |
| 12579 | PPID.1    | 1.25E-25 | 0.25942  | 0.237 | 0.168 | 2.35E-21 | NK cells | PPID     |
| 12580 | ROMO1.5   | 1.62E-25 | 0.340512 | 0.488 | 0.431 | 3.04E-21 | NK cells | ROMO1    |
| 12581 | GBP2.3    | 1.82E-25 | 0.262873 | 0.254 | 0.184 | 3.41E-21 | NK cells | GBP2     |
| 12582 | FYB1.6    | 2.56E-25 | -0.38135 | 0.528 | 0.573 | 4.82E-21 | NK cells | FYB1     |
| 12583 | PTPRA.1   | 2.71E-25 | 0.262536 | 0.163 | 0.105 | 5.10E-21 | NK cells | PTPRA    |
| 12584 | ORMDL2.1  | 3.97E-25 | 0.282396 | 0.222 | 0.158 | 7.46E-21 | NK cells | ORMDL2   |
| 12585 | C1GALT1   | 4.00E-25 | 0.26442  | 0.219 | 0.153 | 7.51E-21 | NK cells | C1GALT1  |
| 12586 | COQ10B    | 4.58E-25 | 0.259942 | 0.204 | 0.141 | 8.60E-21 | NK cells | COQ10B   |
| 12587 | LSM4.1    | 5.36E-25 | 0.323343 | 0.378 | 0.318 | 1.01E-20 | NK cells | LSM4     |
| 12588 | TLE4.1    | 5.93E-25 | 0.309552 | 0.147 | 0.094 | 1.11E-20 | NK cells | TLE4     |
| 12589 | XRCC5.1   | 6.19E-25 | 0.270915 | 0.542 | 0.502 | 1.16E-20 | NK cells | XRCC5    |
| 12590 | RASA2.3   | 7.10E-25 | 0.268777 | 0.266 | 0.195 | 1.33E-20 | NK cells | RASA2    |
| 12591 | AKR1B1.2  | 7.79E-25 | 0.277342 | 0.303 | 0.232 | 1.46E-20 | NK cells | AKR1B1   |
| 12592 | COX20.1   | 1.02E-24 | 0.287268 | 0.245 | 0.178 | 1.92E-20 | NK cells | COX20    |

|       |           |          |          |       |       |          |          |            |
|-------|-----------|----------|----------|-------|-------|----------|----------|------------|
| 12593 | B4GALT3.1 | 1.04E-24 | 0.252934 | 0.228 | 0.162 | 1.95E-20 | NK cells | B4GALT3    |
| 12594 | AL138963. | 1.11E-24 | -0.4301  | 0.143 | 0.221 | 2.08E-20 | NK cells | AL138963.3 |
| 12595 | ADH5.2    | 1.19E-24 | 0.295858 | 0.403 | 0.338 | 2.24E-20 | NK cells | ADH5       |
| 12596 | SAP30BP.1 | 1.34E-24 | 0.278116 | 0.293 | 0.224 | 2.51E-20 | NK cells | SAP30BP    |
| 12597 | NBN.1     | 1.35E-24 | 0.252432 | 0.201 | 0.139 | 2.53E-20 | NK cells | NBN        |
| 12598 | MDH1.2    | 1.44E-24 | 0.277617 | 0.463 | 0.406 | 2.71E-20 | NK cells | MDH1       |
| 12599 | LRRFIP1.4 | 1.73E-24 | 0.290927 | 0.506 | 0.452 | 3.25E-20 | NK cells | LRRFIP1    |
| 12600 | ECH1.1    | 2.37E-24 | 0.290877 | 0.297 | 0.227 | 4.46E-20 | NK cells | ECH1       |
| 12601 | DGUOK.2   | 3.23E-24 | 0.317792 | 0.463 | 0.407 | 6.06E-20 | NK cells | DGUOK      |
| 12602 | CLTB.2    | 4.16E-24 | 0.287856 | 0.262 | 0.195 | 7.82E-20 | NK cells | CLTB       |
| 12603 | C9orf78.3 | 4.40E-24 | 0.291007 | 0.445 | 0.38  | 8.27E-20 | NK cells | C9orf78    |
| 12604 | SRRM1.1   | 4.88E-24 | 0.288607 | 0.517 | 0.461 | 9.17E-20 | NK cells | SRRM1      |
| 12605 | KDM5A.2   | 5.50E-24 | 0.275326 | 0.228 | 0.164 | 1.03E-19 | NK cells | KDM5A      |
| 12606 | RPS4Y1.2  | 5.75E-24 | -0.58522 | 0.419 | 0.45  | 1.08E-19 | NK cells | RPS4Y1     |
| 12607 | CD2.4     | 6.00E-24 | 0.403356 | 0.383 | 0.315 | 1.13E-19 | NK cells | CD2        |
| 12608 | SNX17.2   | 6.01E-24 | 0.290989 | 0.472 | 0.416 | 1.13E-19 | NK cells | SNX17      |
| 12609 | GSDMD.1   | 7.02E-24 | 0.278963 | 0.319 | 0.25  | 1.32E-19 | NK cells | GSDMD      |
| 12610 | POLR2J.1  | 7.52E-24 | 0.321603 | 0.381 | 0.317 | 1.41E-19 | NK cells | POLR2J     |
| 12611 | SMIM12    | 7.96E-24 | 0.250865 | 0.251 | 0.184 | 1.49E-19 | NK cells | SMIM12     |
| 12612 | GLRX3.1   | 1.02E-23 | 0.256853 | 0.261 | 0.194 | 1.91E-19 | NK cells | GLRX3      |
| 12613 | HNRNPR.2  | 1.23E-23 | 0.281736 | 0.467 | 0.414 | 2.31E-19 | NK cells | HNRNPR     |
| 12614 | PHF20.2   | 1.23E-23 | 0.299592 | 0.314 | 0.246 | 2.31E-19 | NK cells | PHF20      |
| 12615 | MED10.3   | 1.76E-23 | 0.279547 | 0.421 | 0.36  | 3.31E-19 | NK cells | MED10      |
| 12616 | DGCR6L.3  | 1.95E-23 | 0.270867 | 0.322 | 0.253 | 3.66E-19 | NK cells | DGCR6L     |
| 12617 | TAOK3.1   | 2.23E-23 | 0.300182 | 0.3   | 0.233 | 4.19E-19 | NK cells | TAOK3      |
| 12618 | NAMPT.4   | 2.33E-23 | -0.51816 | 0.077 | 0.14  | 4.37E-19 | NK cells | NAMPT      |
| 12619 | IRF8.4    | 2.35E-23 | -0.41917 | 0.108 | 0.173 | 4.41E-19 | NK cells | IRF8       |
| 12620 | PET100.1  | 2.61E-23 | 0.337802 | 0.512 | 0.458 | 4.90E-19 | NK cells | PET100     |
| 12621 | COPB2.2   | 3.74E-23 | 0.258854 | 0.255 | 0.188 | 7.03E-19 | NK cells | COPB2      |
| 12622 | SLC44A2.5 | 3.76E-23 | 0.289088 | 0.397 | 0.331 | 7.07E-19 | NK cells | SLC44A2    |
| 12623 | APBB1IP.3 | 3.94E-23 | 0.27701  | 0.508 | 0.451 | 7.40E-19 | NK cells | APBB1IP    |
| 12624 | IKZF3.5   | 4.30E-23 | 0.256309 | 0.219 | 0.154 | 8.07E-19 | NK cells | IKZF3      |
| 12625 | COPB1     | 4.65E-23 | 0.250036 | 0.214 | 0.152 | 8.73E-19 | NK cells | COPB1      |
| 12626 | PLD3.3    | 4.98E-23 | 0.275535 | 0.27  | 0.206 | 9.36E-19 | NK cells | PLD3       |
| 12627 | RTF2.1    | 5.49E-23 | 0.281839 | 0.378 | 0.312 | 1.03E-18 | NK cells | RTF2       |
| 12628 | PHKG2.1   | 5.64E-23 | 0.260762 | 0.213 | 0.152 | 1.06E-18 | NK cells | PHKG2      |
| 12629 | NUDT22.1  | 5.83E-23 | 0.298117 | 0.298 | 0.231 | 1.10E-18 | NK cells | NUDT22     |
| 12630 | STIP1.1   | 5.84E-23 | 0.257187 | 0.243 | 0.178 | 1.10E-18 | NK cells | STIP1      |
| 12631 | HLA-DPA1. | 6.08E-23 | -1.64626 | 0.501 | 0.458 | 1.14E-18 | NK cells | HLA-DPA1   |
| 12632 | LHPP.4    | 6.20E-23 | -0.25625 | 0.097 | 0.163 | 1.16E-18 | NK cells | LHPP       |
| 12633 | MCM7.2    | 7.16E-23 | 0.37218  | 0.178 | 0.124 | 1.35E-18 | NK cells | MCM7       |
| 12634 | ZCCHC7.5  | 7.73E-23 | -0.26486 | 0.15  | 0.224 | 1.45E-18 | NK cells | ZCCHC7     |
| 12635 | MRPL41.3  | 1.03E-22 | 0.271911 | 0.421 | 0.359 | 1.93E-18 | NK cells | MRPL41     |
| 12636 | DDX46.1   | 1.04E-22 | 0.287299 | 0.393 | 0.327 | 1.94E-18 | NK cells | DDX46      |
| 12637 | GOLGA4.1  | 1.04E-22 | 0.25982  | 0.229 | 0.166 | 1.95E-18 | NK cells | GOLGA4     |
| 12638 | TSPAN3.6  | 1.56E-22 | -0.26722 | 0.139 | 0.212 | 2.94E-18 | NK cells | TSPAN3     |
| 12639 | SDHA.2    | 1.57E-22 | 0.276573 | 0.344 | 0.278 | 2.95E-18 | NK cells | SDHA       |

|       |            |          |          |       |       |          |          |           |
|-------|------------|----------|----------|-------|-------|----------|----------|-----------|
| 12640 | FYTDD1.1   | 1.69E-22 | 0.289144 | 0.219 | 0.16  | 3.18E-18 | NK cells | FYTDD1    |
| 12641 | SCAMP2.1   | 1.79E-22 | 0.296315 | 0.401 | 0.337 | 3.36E-18 | NK cells | SCAMP2    |
| 12642 | ADAM10.3   | 2.42E-22 | 0.307467 | 0.239 | 0.178 | 4.55E-18 | NK cells | ADAM10    |
| 12643 | VPS4B.2    | 3.89E-22 | 0.258712 | 0.28  | 0.214 | 7.31E-18 | NK cells | VPS4B     |
| 12644 | SHMT2.4    | 4.39E-22 | -0.28154 | 0.224 | 0.301 | 8.25E-18 | NK cells | SHMT2     |
| 12645 | FUNDC2     | 9.33E-22 | 0.281137 | 0.359 | 0.294 | 1.75E-17 | NK cells | FUNDC2    |
| 12646 | SERINC3.1  | 1.11E-21 | 0.277794 | 0.281 | 0.218 | 2.09E-17 | NK cells | SERINC3   |
| 12647 | ATRAID.1   | 1.59E-21 | 0.285913 | 0.393 | 0.33  | 2.99E-17 | NK cells | ATRAID    |
| 12648 | RAB5C.2    | 1.62E-21 | 0.264876 | 0.225 | 0.165 | 3.04E-17 | NK cells | RAB5C     |
| 12649 | PTP4A2.3   | 1.68E-21 | 0.282992 | 0.371 | 0.307 | 3.15E-17 | NK cells | PTP4A2    |
| 12650 | AAK1.2     | 1.87E-21 | 0.274402 | 0.296 | 0.229 | 3.52E-17 | NK cells | AAK1      |
| 12651 | TCEAL8.1   | 2.11E-21 | 0.258839 | 0.172 | 0.117 | 3.95E-17 | NK cells | TCEAL8    |
| 12652 | STOML2.2   | 2.49E-21 | 0.255086 | 0.316 | 0.252 | 4.68E-17 | NK cells | STOML2    |
| 12653 | ADSS.2     | 3.62E-21 | 0.301154 | 0.287 | 0.226 | 6.79E-17 | NK cells | ADSS      |
| 12654 | SRSF4.1    | 3.71E-21 | 0.285764 | 0.371 | 0.309 | 6.96E-17 | NK cells | SRSF4     |
| 12655 | SRP19.2    | 4.43E-21 | 0.285558 | 0.296 | 0.233 | 8.32E-17 | NK cells | SRP19     |
| 12656 | TEX264.2   | 5.50E-21 | 0.276259 | 0.344 | 0.283 | 1.03E-16 | NK cells | TEX264    |
| 12657 | DCTN2.3    | 5.57E-21 | 0.273632 | 0.32  | 0.257 | 1.05E-16 | NK cells | DCTN2     |
| 12658 | SMIM14.5   | 6.29E-21 | -0.34905 | 0.123 | 0.188 | 1.18E-16 | NK cells | SMIM14    |
| 12659 | AURKAIP1.  | 6.45E-21 | 0.257476 | 0.47  | 0.42  | 1.21E-16 | NK cells | AURKAIP1  |
| 12660 | C1orf162.5 | 9.31E-21 | 0.308294 | 0.424 | 0.363 | 1.75E-16 | NK cells | C1orf162  |
| 12661 | LPXN.3     | 9.39E-21 | 0.277423 | 0.27  | 0.209 | 1.76E-16 | NK cells | LPXN      |
| 12662 | ARL2BP.3   | 1.08E-20 | 0.252099 | 0.297 | 0.233 | 2.02E-16 | NK cells | ARL2BP    |
| 12663 | POLR2B.1   | 1.09E-20 | 0.274326 | 0.259 | 0.197 | 2.05E-16 | NK cells | POLR2B    |
| 12664 | IMP3.2     | 1.24E-20 | 0.25971  | 0.522 | 0.473 | 2.33E-16 | NK cells | IMP3      |
| 12665 | PGD.6      | 1.33E-20 | -0.39574 | 0.157 | 0.224 | 2.50E-16 | NK cells | PGD       |
| 12666 | RNF187     | 1.47E-20 | 0.25103  | 0.22  | 0.161 | 2.76E-16 | NK cells | RNF187    |
| 12667 | STUB1      | 1.49E-20 | 0.271866 | 0.279 | 0.216 | 2.80E-16 | NK cells | STUB1     |
| 12668 | SPAG7      | 1.58E-20 | 0.257432 | 0.284 | 0.221 | 2.97E-16 | NK cells | SPAG7     |
| 12669 | LAMTOR2.   | 1.69E-20 | 0.255407 | 0.361 | 0.295 | 3.17E-16 | NK cells | LAMTOR2   |
| 12670 | BPTF.2     | 2.39E-20 | 0.269156 | 0.234 | 0.174 | 4.49E-16 | NK cells | BPTF      |
| 12671 | NR3C1.1    | 2.75E-20 | 0.299776 | 0.335 | 0.273 | 5.16E-16 | NK cells | NR3C1     |
| 12672 | CALCOCO2   | 3.19E-20 | 0.254129 | 0.311 | 0.248 | 5.99E-16 | NK cells | CALCOCO2  |
| 12673 | TCP1.2     | 3.72E-20 | 0.284147 | 0.331 | 0.271 | 7.00E-16 | NK cells | TCP1      |
| 12674 | PRPF38B.2  | 6.26E-20 | 0.256223 | 0.338 | 0.275 | 1.18E-15 | NK cells | PRPF38B   |
| 12675 | ROCK1.3    | 8.16E-20 | 0.260731 | 0.303 | 0.24  | 1.53E-15 | NK cells | ROCK1     |
| 12676 | MAGOH.2    | 1.52E-19 | 0.270834 | 0.464 | 0.419 | 2.85E-15 | NK cells | MAGOH     |
| 12677 | NDUFA13.   | 1.72E-19 | 0.315274 | 0.372 | 0.314 | 3.23E-15 | NK cells | NDUFA13   |
| 12678 | ZFP36L1.4  | 2.11E-19 | -0.27833 | 0.463 | 0.544 | 3.97E-15 | NK cells | ZFP36L1   |
| 12679 | SDHC.1     | 3.86E-19 | 0.258364 | 0.395 | 0.338 | 7.25E-15 | NK cells | SDHC      |
| 12680 | PHF5A.1    | 4.36E-19 | 0.2513   | 0.294 | 0.234 | 8.19E-15 | NK cells | PHF5A     |
| 12681 | MMADHC.    | 5.15E-19 | 0.254974 | 0.386 | 0.33  | 9.67E-15 | NK cells | MMADHC    |
| 12682 | STX7.4     | 5.33E-19 | -0.28355 | 0.159 | 0.225 | 1.00E-14 | NK cells | STX7      |
| 12683 | EIF4H.1    | 6.29E-19 | 0.283207 | 0.417 | 0.37  | 1.18E-14 | NK cells | EIF4H     |
| 12684 | STK4.3     | 8.02E-19 | 0.272008 | 0.548 | 0.508 | 1.51E-14 | NK cells | STK4      |
| 12685 | C14orf119  | 1.07E-18 | 0.254124 | 0.33  | 0.27  | 2.00E-14 | NK cells | C14orf119 |
| 12686 | CYTH1.3    | 1.07E-18 | 0.28721  | 0.396 | 0.34  | 2.00E-14 | NK cells | CYTH1     |

|       |           |          |          |       |       |          |          |           |
|-------|-----------|----------|----------|-------|-------|----------|----------|-----------|
| 12687 | NUDC.1    | 1.12E-18 | 0.259212 | 0.381 | 0.324 | 2.11E-14 | NK cells | NUDC      |
| 12688 | HIST1H1D. | 2.07E-18 | 0.355821 | 0.227 | 0.172 | 3.89E-14 | NK cells | HIST1H1D  |
| 12689 | SARS.1    | 2.78E-18 | 0.279038 | 0.346 | 0.293 | 5.23E-14 | NK cells | SARS      |
| 12690 | FOS.5     | 3.17E-18 | -1.20066 | 0.065 | 0.114 | 5.95E-14 | NK cells | FOS       |
| 12691 | SNRPC.2   | 1.24E-17 | 0.265214 | 0.383 | 0.331 | 2.33E-13 | NK cells | SNRPC     |
| 12692 | RAB14.2   | 2.53E-17 | 0.251534 | 0.33  | 0.274 | 4.76E-13 | NK cells | RAB14     |
| 12693 | SUMO3.3   | 2.97E-17 | 0.256354 | 0.326 | 0.273 | 5.58E-13 | NK cells | SUMO3     |
| 12694 | HIST1H2AC | 3.07E-17 | -0.35928 | 0.141 | 0.204 | 5.77E-13 | NK cells | HIST1H2AC |
| 12695 | SLC38A2.1 | 4.02E-17 | 0.254755 | 0.206 | 0.154 | 7.55E-13 | NK cells | SLC38A2   |
| 12696 | Sep-02    | 9.27E-17 | 0.250611 | 0.306 | 0.251 | 1.74E-12 | NK cells | Sep-02    |
| 12697 | SLTM.1    | 1.28E-16 | 0.263773 | 0.31  | 0.256 | 2.41E-12 | NK cells | SLTM      |
| 12698 | NUCKS1.2  | 1.29E-16 | 0.28032  | 0.356 | 0.307 | 2.42E-12 | NK cells | NUCKS1    |
| 12699 | SF3B1.2   | 1.94E-16 | 0.255374 | 0.483 | 0.442 | 3.64E-12 | NK cells | SF3B1     |
| 12700 | ATRX.3    | 2.32E-16 | 0.2532   | 0.369 | 0.313 | 4.36E-12 | NK cells | ATRX      |
| 12701 | CCT6A.1   | 3.00E-16 | 0.250413 | 0.394 | 0.349 | 5.64E-12 | NK cells | CCT6A     |
| 12702 | SETX.2    | 3.87E-16 | 0.25201  | 0.234 | 0.181 | 7.27E-12 | NK cells | SETX      |
| 12703 | MCM5.3    | 4.93E-16 | 0.266364 | 0.188 | 0.141 | 9.27E-12 | NK cells | MCM5      |
| 12704 | RANBP1.3  | 6.66E-16 | 0.289889 | 0.352 | 0.311 | 1.25E-11 | NK cells | RANBP1    |
| 12705 | JUN.4     | 7.01E-16 | -0.2581  | 0.116 | 0.173 | 1.32E-11 | NK cells | JUN       |
| 12706 | ZNRD1.2   | 7.75E-16 | 0.268383 | 0.352 | 0.301 | 1.46E-11 | NK cells | ZNRD1     |
| 12707 | HMGB2.5   | 9.81E-16 | 0.650211 | 0.305 | 0.268 | 1.84E-11 | NK cells | HMGB2     |
| 12708 | EIF4A1.6  | 1.16E-15 | 0.268919 | 0.259 | 0.208 | 2.18E-11 | NK cells | EIF4A1    |
| 12709 | SRSF11.3  | 4.67E-15 | 0.250002 | 0.461 | 0.418 | 8.77E-11 | NK cells | SRSF11    |
| 12710 | PRRC2C.1  | 6.61E-15 | 0.259422 | 0.49  | 0.454 | 1.24E-10 | NK cells | PRRC2C    |
| 12711 | LSM8.1    | 1.18E-14 | 0.259778 | 0.383 | 0.339 | 2.21E-10 | NK cells | LSM8      |
| 12712 | SERINC1.2 | 1.69E-14 | 0.253079 | 0.297 | 0.25  | 3.17E-10 | NK cells | SERINC1   |
| 12713 | RNASEH2C  | 6.06E-14 | 0.261888 | 0.388 | 0.344 | 1.14E-09 | NK cells | RNASEH2C  |
| 12714 | STXBP2.5  | 6.50E-14 | -0.85869 | 0.143 | 0.189 | 1.22E-09 | NK cells | STXBP2    |
| 12715 | IFNGR1.3  | 9.02E-14 | 0.302229 | 0.264 | 0.217 | 1.69E-09 | NK cells | IFNGR1    |
| 12716 | SAT1.4    | 2.86E-13 | -1.01834 | 0.396 | 0.44  | 5.38E-09 | NK cells | SAT1      |
| 12717 | UBE2J1.5  | 3.07E-13 | -0.26703 | 0.206 | 0.26  | 5.77E-09 | NK cells | UBE2J1    |
| 12718 | MRPL33.2  | 3.13E-13 | 0.262727 | 0.381 | 0.338 | 5.88E-09 | NK cells | MRPL33    |
| 12719 | GSTM2.1   | 5.68E-12 | 0.262886 | 0.118 | 0.085 | 1.07E-07 | NK cells | GSTM2     |
| 12720 | HIST1H4C. | 5.67E-11 | 0.573917 | 0.649 | 0.637 | 1.06E-06 | NK cells | HIST1H4C  |
| 12721 | NDUFB1.3  | 2.42E-10 | 0.290847 | 0.442 | 0.414 | 4.55E-06 | NK cells | NDUFB1    |
| 12722 | CST3.5    | 6.02E-09 | -1.6427  | 0.198 | 0.14  | 0.000113 | NK cells | CST3      |
| 12723 | NPC2.2    | 4.80E-08 | -0.2892  | 0.275 | 0.311 | 0.000902 | NK cells | NPC2      |
| 12724 | DUT.4     | 1.14E-06 | 0.329016 | 0.371 | 0.364 | 0.021449 | NK cells | DUT       |
| 12728 | IL7R.7    | 0        | 2.68923  | 0.792 | 0.096 | 0        | T cells  | IL7R      |
| 12729 | CD3D.6    | 0        | 2.462826 | 0.916 | 0.101 | 0        | T cells  | CD3D      |
| 12730 | CD3E.5    | 0        | 2.4353   | 0.973 | 0.17  | 0        | T cells  | CD3E      |
| 12731 | TCF7.7    | 0        | 2.194912 | 0.711 | 0.076 | 0        | T cells  | TCF7      |
| 12732 | LEF1.7    | 0        | 2.167925 | 0.735 | 0.082 | 0        | T cells  | LEF1      |
| 12733 | CD8B.6    | 0        | 2.083641 | 0.352 | 0.034 | 0        | T cells  | CD8B      |
| 12734 | LDHB.6    | 0        | 2.016485 | 0.951 | 0.504 | 0        | T cells  | LDHB      |
| 12735 | NOSIP.7   | 0        | 1.919227 | 0.861 | 0.373 | 0        | T cells  | NOSIP     |
| 12736 | IL32.8    | 0        | 1.90207  | 0.904 | 0.182 | 0        | T cells  | IL32      |



|       |            |   |          |       |       |   |         |           |
|-------|------------|---|----------|-------|-------|---|---------|-----------|
| 12737 | CD3G.6     | 0 | 1.829942 | 0.704 | 0.074 | 0 | T cells | CD3G      |
| 12738 | GIMAP7.5   | 0 | 1.78843  | 0.905 | 0.306 | 0 | T cells | GIMAP7    |
| 12739 | LCK.6      | 0 | 1.679361 | 0.851 | 0.223 | 0 | T cells | LCK       |
| 12740 | LINC00861  | 0 | 1.599354 | 0.715 | 0.145 | 0 | T cells | LINC00861 |
| 12741 | CD27.7     | 0 | 1.566952 | 0.664 | 0.14  | 0 | T cells | CD27      |
| 12742 | LAT.6      | 0 | 1.517461 | 0.672 | 0.14  | 0 | T cells | LAT       |
| 12743 | CCR7.8     | 0 | 1.512443 | 0.743 | 0.305 | 0 | T cells | CCR7      |
| 12744 | CAMK4.7    | 0 | 1.508245 | 0.532 | 0.057 | 0 | T cells | CAMK4     |
| 12745 | LINC02446  | 0 | 1.412276 | 0.227 | 0.026 | 0 | T cells | LINC02446 |
| 12746 | GIMAP4.6   | 0 | 1.397876 | 0.803 | 0.301 | 0 | T cells | GIMAP4    |
| 12747 | MAL.7      | 0 | 1.395084 | 0.464 | 0.045 | 0 | T cells | MAL       |
| 12748 | LEPROTL1.  | 0 | 1.380475 | 0.71  | 0.263 | 0 | T cells | LEPROTL1  |
| 12749 | ITM2A.5    | 0 | 1.36846  | 0.554 | 0.123 | 0 | T cells | ITM2A     |
| 12750 | FLT3LG.6   | 0 | 1.338271 | 0.587 | 0.164 | 0 | T cells | FLT3LG    |
| 12751 | LDLRAP1.7  | 0 | 1.295895 | 0.486 | 0.088 | 0 | T cells | LDLRAP1   |
| 12752 | RGS10.6    | 0 | 1.293956 | 0.74  | 0.293 | 0 | T cells | RGS10     |
| 12753 | CD8A.5     | 0 | 1.277112 | 0.283 | 0.043 | 0 | T cells | CD8A      |
| 12754 | TRAT1.6    | 0 | 1.274854 | 0.407 | 0.037 | 0 | T cells | TRAT1     |
| 12755 | SARAF.7    | 0 | 1.23682  | 0.963 | 0.8   | 0 | T cells | SARAF     |
| 12756 | FYB1.7     | 0 | 1.233687 | 0.782 | 0.328 | 0 | T cells | FYB1      |
| 12757 | MYC.6      | 0 | 1.229881 | 0.562 | 0.224 | 0 | T cells | MYC       |
| 12758 | CISH.3     | 0 | 1.196046 | 0.314 | 0.073 | 0 | T cells | CISH      |
| 12759 | CD7.7      | 0 | 1.167459 | 0.887 | 0.219 | 0 | T cells | CD7       |
| 12760 | CD2.5      | 0 | 1.163833 | 0.515 | 0.097 | 0 | T cells | CD2       |
| 12761 | OXNAD1.6   | 0 | 1.150602 | 0.409 | 0.058 | 0 | T cells | OXNAD1    |
| 12762 | AQP3.7     | 0 | 1.129824 | 0.385 | 0.062 | 0 | T cells | AQP3      |
| 12763 | C12orf57.6 | 0 | 1.128    | 0.903 | 0.591 | 0 | T cells | C12orf57  |
| 12764 | IFITM1.7   | 0 | 1.081915 | 0.991 | 0.587 | 0 | T cells | IFITM1    |
| 12765 | PCED1B.5   | 0 | 1.069856 | 0.443 | 0.126 | 0 | T cells | PCED1B    |
| 12766 | NUCB2.5    | 0 | 1.058537 | 0.525 | 0.174 | 0 | T cells | NUCB2     |
| 12767 | LIME1.5    | 0 | 1.051638 | 0.472 | 0.126 | 0 | T cells | LIME1     |
| 12768 | PIK3IP1.6  | 0 | 1.051321 | 0.467 | 0.116 | 0 | T cells | PIK3IP1   |
| 12769 | TRAC.5     | 0 | 1.01168  | 0.422 | 0.119 | 0 | T cells | TRAC      |
| 12770 | RGCC.6     | 0 | 1.008248 | 0.341 | 0.058 | 0 | T cells | RGCC      |
| 12771 | PIM1.3     | 0 | 1.003351 | 0.557 | 0.267 | 0 | T cells | PIM1      |
| 12772 | CD5.7      | 0 | 0.997651 | 0.385 | 0.061 | 0 | T cells | CD5       |
| 12773 | CD6.6      | 0 | 0.955613 | 0.358 | 0.053 | 0 | T cells | CD6       |
| 12774 | ITK.5      | 0 | 0.954347 | 0.356 | 0.06  | 0 | T cells | ITK       |
| 12775 | TC2N.3     | 0 | 0.952412 | 0.355 | 0.059 | 0 | T cells | TC2N      |
| 12776 | SPOCK2.5   | 0 | 0.943294 | 0.482 | 0.15  | 0 | T cells | SPOCK2    |
| 12777 | ACTN1.7    | 0 | 0.933924 | 0.401 | 0.094 | 0 | T cells | ACTN1     |
| 12778 | EVL.6      | 0 | 0.931936 | 0.884 | 0.573 | 0 | T cells | EVL       |
| 12779 | SIRPG.7    | 0 | 0.916289 | 0.302 | 0.028 | 0 | T cells | SIRPG     |
| 12780 | TRABD2A.6  | 0 | 0.909747 | 0.307 | 0.036 | 0 | T cells | TRABD2A   |
| 12781 | DGKA.7     | 0 | 0.899416 | 0.463 | 0.157 | 0 | T cells | DGKA      |
| 12782 | DENND2D.6  | 0 | 0.892947 | 0.565 | 0.23  | 0 | T cells | DENND2D   |
| 12783 | HSPA8.6    | 0 | 0.886281 | 0.948 | 0.771 | 0 | T cells | HSPA8     |

|       |            |   |          |       |       |           |           |
|-------|------------|---|----------|-------|-------|-----------|-----------|
| 12784 | GYPC.5     | 0 | 0.885987 | 0.808 | 0.519 | 0 T cells | GYPC      |
| 12785 | RPS12.8    | 0 | 0.870874 | 1     | 0.989 | 0 T cells | RPS12     |
| 12786 | MGAT4A.3   | 0 | 0.870716 | 0.386 | 0.105 | 0 T cells | MGAT4A    |
| 12787 | TPT1.6     | 0 | 0.860876 | 0.999 | 0.989 | 0 T cells | TPT1      |
| 12788 | AES.5      | 0 | 0.859628 | 0.868 | 0.576 | 0 T cells | AES       |
| 12789 | NDFIP1.5   | 0 | 0.850305 | 0.576 | 0.297 | 0 T cells | NDFIP1    |
| 12790 | RCAN3.6    | 0 | 0.844565 | 0.338 | 0.078 | 0 T cells | RCAN3     |
| 12791 | LRRN3.6    | 0 | 0.843574 | 0.221 | 0.016 | 0 T cells | LRRN3     |
| 12792 | TMEM204.   | 0 | 0.830651 | 0.297 | 0.039 | 0 T cells | TMEM204   |
| 12793 | NPM1.6     | 0 | 0.821557 | 0.97  | 0.841 | 0 T cells | NPM1      |
| 12794 | PRMT2.6    | 0 | 0.817499 | 0.668 | 0.382 | 0 T cells | PRMT2     |
| 12795 | SATB1.3    | 0 | 0.810621 | 0.366 | 0.107 | 0 T cells | SATB1     |
| 12796 | ZAP70.7    | 0 | 0.800044 | 0.556 | 0.167 | 0 T cells | ZAP70     |
| 12797 | RPS4X.6    | 0 | 0.78509  | 1     | 0.979 | 0 T cells | RPS4X     |
| 12798 | RPS15A.6   | 0 | 0.78307  | 1     | 0.993 | 0 T cells | RPS15A    |
| 12799 | SLFN5.6    | 0 | 0.770336 | 0.376 | 0.121 | 0 T cells | SLFN5     |
| 12800 | LINC01550  | 0 | 0.77029  | 0.245 | 0.021 | 0 T cells | LINC01550 |
| 12801 | HSPB1.8    | 0 | 0.768143 | 0.598 | 0.316 | 0 T cells | HSPB1     |
| 12802 | GZMM.7     | 0 | 0.767429 | 0.614 | 0.174 | 0 T cells | GZMM      |
| 12803 | RPS3A.6    | 0 | 0.764746 | 1     | 0.982 | 0 T cells | RPS3A     |
| 12804 | RPL34.7    | 0 | 0.763168 | 1     | 0.989 | 0 T cells | RPL34     |
| 12805 | NELL2.6    | 0 | 0.74015  | 0.207 | 0.014 | 0 T cells | NELL2     |
| 12806 | LINC02273  | 0 | 0.739342 | 0.251 | 0.031 | 0 T cells | LINC02273 |
| 12807 | OCIAD2.3   | 0 | 0.738683 | 0.556 | 0.284 | 0 T cells | OCIAD2    |
| 12808 | EEF1A1.5   | 0 | 0.729286 | 1     | 0.993 | 0 T cells | EEF1A1    |
| 12809 | CD40LG.5   | 0 | 0.726684 | 0.196 | 0.017 | 0 T cells | CD40LG    |
| 12810 | GIMAP5.4   | 0 | 0.726675 | 0.254 | 0.042 | 0 T cells | GIMAP5    |
| 12811 | RPL32.5    | 0 | 0.72348  | 1     | 0.989 | 0 T cells | RPL32     |
| 12812 | RPS3.5     | 0 | 0.715416 | 1     | 0.986 | 0 T cells | RPS3      |
| 12813 | INPP4B.4   | 0 | 0.710957 | 0.225 | 0.024 | 0 T cells | INPP4B    |
| 12814 | TRBC1.6    | 0 | 0.710849 | 0.435 | 0.154 | 0 T cells | TRBC1     |
| 12815 | RPS14.7    | 0 | 0.705989 | 0.999 | 0.982 | 0 T cells | RPS14     |
| 12816 | SEPT1.5    | 0 | 0.703835 | 0.703 | 0.436 | 0 T cells | Sep-01    |
| 12817 | BEX3.7     | 0 | 0.703216 | 0.291 | 0.057 | 0 T cells | BEX3      |
| 12818 | ETS1.5     | 0 | 0.693748 | 0.463 | 0.215 | 0 T cells | ETS1      |
| 12819 | GIMAP1.3   | 0 | 0.691555 | 0.323 | 0.118 | 0 T cells | GIMAP1    |
| 12820 | RPL14.6    | 0 | 0.689804 | 1     | 0.977 | 0 T cells | RPL14     |
| 12821 | PRDX2.5    | 0 | 0.686071 | 0.552 | 0.297 | 0 T cells | PRDX2     |
| 12822 | RPL35A.7   | 0 | 0.685698 | 0.999 | 0.977 | 0 T cells | RPL35A    |
| 12823 | RBL2.5     | 0 | 0.680545 | 0.494 | 0.261 | 0 T cells | RBL2      |
| 12824 | LCP2.4     | 0 | 0.677837 | 0.473 | 0.221 | 0 T cells | LCP2      |
| 12825 | THEMIS.6   | 0 | 0.673584 | 0.219 | 0.02  | 0 T cells | THEMIS    |
| 12826 | TRAF3IP3.5 | 0 | 0.673057 | 0.763 | 0.543 | 0 T cells | TRAF3IP3  |
| 12827 | TMEM123.   | 0 | 0.670933 | 0.566 | 0.34  | 0 T cells | TMEM123   |
| 12828 | PASK.3     | 0 | 0.668343 | 0.188 | 0.039 | 0 T cells | PASK      |
| 12829 | PRKCH.7    | 0 | 0.667122 | 0.372 | 0.109 | 0 T cells | PRKCH     |
| 12830 | IL6ST.6    | 0 | 0.665978 | 0.266 | 0.077 | 0 T cells | IL6ST     |

|       |            |   |          |       |       |           |          |
|-------|------------|---|----------|-------|-------|-----------|----------|
| 12831 | ABLIM1.6   | 0 | 0.659144 | 0.38  | 0.154 | 0 T cells | ABLIM1   |
| 12832 | RPL36A.7   | 0 | 0.656959 | 0.876 | 0.721 | 0 T cells | RPL36A   |
| 12833 | CYTIP.4    | 0 | 0.655137 | 0.611 | 0.381 | 0 T cells | CYTIP    |
| 12834 | RPL30.5    | 0 | 0.654908 | 1     | 0.994 | 0 T cells | RPL30    |
| 12835 | RPS6.6     | 0 | 0.651866 | 1     | 0.976 | 0 T cells | RPS6     |
| 12836 | SELL.6     | 0 | 0.651633 | 0.833 | 0.673 | 0 T cells | SELL     |
| 12837 | MCUB.6     | 0 | 0.651064 | 0.612 | 0.404 | 0 T cells | MCUB     |
| 12838 | TRAV8-3    | 0 | 0.645012 | 0.109 | 0.01  | 0 T cells | TRAV8-3  |
| 12839 | TMIGD2.4   | 0 | 0.64457  | 0.294 | 0.068 | 0 T cells | TMIGD2   |
| 12840 | UBASH3A.6  | 0 | 0.644494 | 0.215 | 0.02  | 0 T cells | UBASH3A  |
| 12841 | RPS21.7    | 0 | 0.642117 | 0.998 | 0.975 | 0 T cells | RPS21    |
| 12842 | AAK1.3     | 0 | 0.640766 | 0.327 | 0.125 | 0 T cells | AAK1     |
| 12843 | RPS28.7    | 0 | 0.64033  | 1     | 0.988 | 0 T cells | RPS28    |
| 12844 | RPS27A.5   | 0 | 0.636233 | 1     | 0.988 | 0 T cells | RPS27A   |
| 12845 | RPL3.5     | 0 | 0.63538  | 1     | 0.97  | 0 T cells | RPL3     |
| 12846 | RPS27.7    | 0 | 0.633941 | 1     | 0.987 | 0 T cells | RPS27    |
| 12847 | RPS25.6    | 0 | 0.632703 | 1     | 0.981 | 0 T cells | RPS25    |
| 12848 | RPL22.6    | 0 | 0.631972 | 0.995 | 0.956 | 0 T cells | RPL22    |
| 12849 | RPL37.7    | 0 | 0.631717 | 0.994 | 0.964 | 0 T cells | RPL37    |
| 12850 | SKAP1.7    | 0 | 0.628807 | 0.491 | 0.216 | 0 T cells | SKAP1    |
| 12851 | CD96.6     | 0 | 0.628753 | 0.293 | 0.08  | 0 T cells | CD96     |
| 12852 | GSTK1.4    | 0 | 0.628272 | 0.766 | 0.576 | 0 T cells | GSTK1    |
| 12853 | SELPLG.5   | 0 | 0.626434 | 0.593 | 0.315 | 0 T cells | SELPLG   |
| 12854 | RPL39.6    | 0 | 0.623871 | 1     | 0.994 | 0 T cells | RPL39    |
| 12855 | THEM4.3    | 0 | 0.622921 | 0.25  | 0.072 | 0 T cells | THEM4    |
| 12856 | ATP6V0E2.5 | 0 | 0.621375 | 0.303 | 0.1   | 0 T cells | ATP6V0E2 |
| 12857 | RPS29.5    | 0 | 0.621303 | 0.896 | 0.755 | 0 T cells | RPS29    |
| 12858 | GIMAP2.4   | 0 | 0.6192   | 0.334 | 0.143 | 0 T cells | GIMAP2   |
| 12859 | RPL36.7    | 0 | 0.610646 | 1     | 0.978 | 0 T cells | RPL36    |
| 12860 | RPL10.5    | 0 | 0.61039  | 1     | 0.989 | 0 T cells | RPL10    |
| 12861 | DNAJB1.4   | 0 | 0.608671 | 0.374 | 0.179 | 0 T cells | DNAJB1   |
| 12862 | TESPA1.3   | 0 | 0.607233 | 0.241 | 0.056 | 0 T cells | TESPA1   |
| 12863 | ANXA2R.5   | 0 | 0.606219 | 0.367 | 0.151 | 0 T cells | ANXA2R   |
| 12864 | SUSD3.8    | 0 | 0.604726 | 0.319 | 0.13  | 0 T cells | SUSD3    |
| 12865 | RPL21.5    | 0 | 0.603413 | 0.989 | 0.946 | 0 T cells | RPL21    |
| 12866 | ITGA6.5    | 0 | 0.601938 | 0.199 | 0.028 | 0 T cells | ITGA6    |
| 12867 | EPHX2.5    | 0 | 0.600638 | 0.185 | 0.019 | 0 T cells | EPHX2    |
| 12868 | EEF1B2.6   | 0 | 0.599986 | 0.992 | 0.941 | 0 T cells | EEF1B2   |
| 12869 | TNFRSF25.5 | 0 | 0.597146 | 0.205 | 0.03  | 0 T cells | TNFRSF25 |
| 12870 | RPS18.6    | 0 | 0.596443 | 1     | 0.981 | 0 T cells | RPS18    |
| 12871 | CDC25B.4   | 0 | 0.594322 | 0.354 | 0.16  | 0 T cells | CDC25B   |
| 12872 | PABPC1.5   | 0 | 0.592492 | 0.96  | 0.922 | 0 T cells | PABPC1   |
| 12873 | PIM2.5     | 0 | 0.592424 | 0.397 | 0.203 | 0 T cells | PIM2     |
| 12874 | STMN3.5    | 0 | 0.582203 | 0.281 | 0.091 | 0 T cells | STMN3    |
| 12875 | SH3YL1.5   | 0 | 0.581627 | 0.28  | 0.101 | 0 T cells | SH3YL1   |
| 12876 | RPL5.6     | 0 | 0.581149 | 0.999 | 0.967 | 0 T cells | RPL5     |
| 12877 | EIF3E.7    | 0 | 0.579366 | 0.761 | 0.586 | 0 T cells | EIF3E    |

|                 |   |          |       |       |           |           |
|-----------------|---|----------|-------|-------|-----------|-----------|
| 12878 MT1X.2    | 0 | 0.579069 | 0.29  | 0.121 | 0 T cells | MT1X      |
| 12879 RPS13.5   | 0 | 0.573951 | 1     | 0.986 | 0 T cells | RPS13     |
| 12880 SIGIRR.5  | 0 | 0.566637 | 0.489 | 0.293 | 0 T cells | SIGIRR    |
| 12881 ATP1A1.3  | 0 | 0.562517 | 0.361 | 0.197 | 0 T cells | ATP1A1    |
| 12882 RPL4.4    | 0 | 0.561425 | 0.951 | 0.855 | 0 T cells | RPL4      |
| 12883 HMOX2.5   | 0 | 0.559818 | 0.492 | 0.283 | 0 T cells | HMOX2     |
| 12884 CD28.4    | 0 | 0.55578  | 0.18  | 0.021 | 0 T cells | CD28      |
| 12885 RARRES3.7 | 0 | 0.546887 | 0.691 | 0.401 | 0 T cells | RARRES3   |
| 12886 RPS8.7    | 0 | 0.545568 | 1     | 0.982 | 0 T cells | RPS8      |
| 12887 ACAP1.4   | 0 | 0.543182 | 0.585 | 0.385 | 0 T cells | ACAP1     |
| 12888 RPL13.5   | 0 | 0.542246 | 1     | 0.983 | 0 T cells | RPL13     |
| 12889 CHRM3-AS  | 0 | 0.534171 | 0.162 | 0.015 | 0 T cells | CHRM3-AS2 |
| 12890 RPL6.4    | 0 | 0.533875 | 1     | 0.98  | 0 T cells | RPL6      |
| 12891 BCL11B.4  | 0 | 0.532184 | 0.176 | 0.028 | 0 T cells | BCL11B    |
| 12892 ADD3.6    | 0 | 0.529441 | 0.58  | 0.391 | 0 T cells | ADD3      |
| 12893 RPL38.6   | 0 | 0.52607  | 0.876 | 0.743 | 0 T cells | RPL38     |
| 12894 PPA1.5    | 0 | 0.520262 | 0.462 | 0.279 | 0 T cells | PPA1      |
| 12895 GIMAP6.5  | 0 | 0.520123 | 0.246 | 0.086 | 0 T cells | GIMAP6    |
| 12896 PDE3B.4   | 0 | 0.520053 | 0.22  | 0.061 | 0 T cells | PDE3B     |
| 12897 RPL10A.6  | 0 | 0.517994 | 0.985 | 0.919 | 0 T cells | RPL10A    |
| 12898 FAM102A.4 | 0 | 0.514207 | 0.206 | 0.055 | 0 T cells | FAM102A   |
| 12899 UQCRB.4   | 0 | 0.51283  | 0.838 | 0.685 | 0 T cells | UQCRB     |
| 12900 RPL9.5    | 0 | 0.511083 | 0.997 | 0.97  | 0 T cells | RPL9      |
| 12901 BNIP3.3   | 0 | 0.510611 | 0.248 | 0.086 | 0 T cells | BNIP3     |
| 12902 RPL24.5   | 0 | 0.494472 | 0.998 | 0.97  | 0 T cells | RPL24     |
| 12903 ARMH1.5   | 0 | 0.494137 | 0.259 | 0.115 | 0 T cells | ARMH1     |
| 12904 RPL19.4   | 0 | 0.490891 | 1     | 0.989 | 0 T cells | RPL19     |
| 12905 RPL11.5   | 0 | 0.489533 | 1     | 0.989 | 0 T cells | RPL11     |
| 12906 NACA.6    | 0 | 0.488785 | 0.998 | 0.982 | 0 T cells | NACA      |
| 12907 SCML4.3   | 0 | 0.485597 | 0.256 | 0.094 | 0 T cells | SCML4     |
| 12908 MYL12A.7  | 0 | 0.481007 | 0.98  | 0.907 | 0 T cells | MYL12A    |
| 12909 BTF3.6    | 0 | 0.479556 | 0.979 | 0.927 | 0 T cells | BTF3      |
| 12910 RPLP2.6   | 0 | 0.47887  | 0.989 | 0.947 | 0 T cells | RPLP2     |
| 12911 MLLT3.4   | 0 | 0.478294 | 0.176 | 0.037 | 0 T cells | MLLT3     |
| 12912 RPS16.5   | 0 | 0.478165 | 0.958 | 0.888 | 0 T cells | RPS16     |
| 12913 APBB1.3   | 0 | 0.477205 | 0.195 | 0.05  | 0 T cells | APBB1     |
| 12914 RPS5.7    | 0 | 0.470288 | 0.999 | 0.967 | 0 T cells | RPS5      |
| 12915 TMEM173.4 | 0 | 0.468563 | 0.256 | 0.12  | 0 T cells | TMEM173   |
| 12916 GATA3.5   | 0 | 0.468326 | 0.177 | 0.042 | 0 T cells | GATA3     |
| 12917 RPL28.5   | 0 | 0.467973 | 1     | 0.995 | 0 T cells | RPL28     |
| 12918 RPL29.6   | 0 | 0.467413 | 1     | 0.985 | 0 T cells | RPL29     |
| 12919 TOMM7.6   | 0 | 0.466138 | 0.875 | 0.759 | 0 T cells | TOMM7     |
| 12920 ANP32B.6  | 0 | 0.465404 | 0.724 | 0.569 | 0 T cells | ANP32B    |
| 12921 SNRPD2.4  | 0 | 0.464234 | 0.903 | 0.775 | 0 T cells | SNRPD2    |
| 12922 SERINC5.4 | 0 | 0.46408  | 0.176 | 0.038 | 0 T cells | SERINC5   |
| 12923 RPS2.4    | 0 | 0.462225 | 0.901 | 0.803 | 0 T cells | RPS2      |
| 12924 PLCG1.3   | 0 | 0.462183 | 0.166 | 0.031 | 0 T cells | PLCG1     |

|                 |   |          |       |       |           |            |
|-----------------|---|----------|-------|-------|-----------|------------|
| 12925 SOD1.3    | 0 | 0.45981  | 0.775 | 0.607 | 0 T cells | SOD1       |
| 12926 RPS24.7   | 0 | 0.457858 | 1     | 0.988 | 0 T cells | RPS24      |
| 12927 RPL31.6   | 0 | 0.456888 | 0.923 | 0.824 | 0 T cells | RPL31      |
| 12928 RPLP0.4   | 0 | 0.454456 | 0.999 | 0.97  | 0 T cells | RPLP0      |
| 12929 TXK.5     | 0 | 0.4494   | 0.24  | 0.075 | 0 T cells | TXK        |
| 12930 TECR.5    | 0 | 0.445032 | 0.523 | 0.352 | 0 T cells | TECR       |
| 12931 SH2D1A.4  | 0 | 0.444178 | 0.193 | 0.058 | 0 T cells | SH2D1A     |
| 12932 TCEA3.1   | 0 | 0.440147 | 0.138 | 0.016 | 0 T cells | TCEA3      |
| 12933 S1PR1.4   | 0 | 0.438993 | 0.46  | 0.278 | 0 T cells | S1PR1      |
| 12934 RPL26.6   | 0 | 0.435041 | 0.999 | 0.977 | 0 T cells | RPL26      |
| 12935 RPSA.5    | 0 | 0.433396 | 0.972 | 0.902 | 0 T cells | RPSA       |
| 12936 PITPNC1.4 | 0 | 0.431969 | 0.226 | 0.098 | 0 T cells | PITPNC1    |
| 12937 GPR171.1  | 0 | 0.429772 | 0.131 | 0.02  | 0 T cells | GPR171     |
| 12938 ADTRP     | 0 | 0.427474 | 0.114 | 0.013 | 0 T cells | ADTRP      |
| 12939 EIF3H.4   | 0 | 0.42735  | 0.808 | 0.692 | 0 T cells | EIF3H      |
| 12940 RPL18.5   | 0 | 0.426989 | 1     | 0.98  | 0 T cells | RPL18      |
| 12941 ST13.4    | 0 | 0.426795 | 0.695 | 0.553 | 0 T cells | ST13       |
| 12942 TNIK.3    | 0 | 0.426269 | 0.175 | 0.048 | 0 T cells | TNIK       |
| 12943 EEF1D.5   | 0 | 0.42582  | 0.995 | 0.972 | 0 T cells | EEF1D      |
| 12944 COX6C.4   | 0 | 0.425115 | 0.838 | 0.69  | 0 T cells | COX6C      |
| 12945 CNN2.5    | 0 | 0.422555 | 0.745 | 0.609 | 0 T cells | CNN2       |
| 12946 HCST.7    | 0 | 0.420463 | 0.79  | 0.443 | 0 T cells | HCST       |
| 12947 MALAT1.4  | 0 | 0.415307 | 0.999 | 0.993 | 0 T cells | MALAT1     |
| 12948 ABRACL.2  | 0 | 0.414443 | 0.634 | 0.464 | 0 T cells | ABRACL     |
| 12949 HNRNPA1.  | 0 | 0.410565 | 0.957 | 0.888 | 0 T cells | HNRNPA1    |
| 12950 IPCEF1.4  | 0 | 0.408641 | 0.166 | 0.047 | 0 T cells | IPCEF1     |
| 12951 OLFM2     | 0 | 0.400576 | 0.127 | 0.014 | 0 T cells | OLFM2      |
| 12952 FBLN5     | 0 | 0.397005 | 0.117 | 0.014 | 0 T cells | FBLN5      |
| 12953 LGALS3BP. | 0 | 0.394533 | 0.162 | 0.045 | 0 T cells | LGALS3BP   |
| 12954 RPS15.5   | 0 | 0.391792 | 1     | 0.987 | 0 T cells | RPS15      |
| 12955 RPL23A.5  | 0 | 0.391517 | 0.986 | 0.936 | 0 T cells | RPL23A     |
| 12956 APRT.4    | 0 | 0.389982 | 0.808 | 0.678 | 0 T cells | APRT       |
| 12957 COMMD6.   | 0 | 0.386577 | 0.946 | 0.88  | 0 T cells | COMMD6     |
| 12958 PRKCQ.4   | 0 | 0.386192 | 0.156 | 0.037 | 0 T cells | PRKCQ      |
| 12959 RPL41.5   | 0 | 0.385223 | 1     | 0.998 | 0 T cells | RPL41      |
| 12960 RPS23.7   | 0 | 0.377632 | 1     | 0.984 | 0 T cells | RPS23      |
| 12961 RPL12.6   | 0 | 0.374288 | 1     | 0.983 | 0 T cells | RPL12      |
| 12962 RPL37A.5  | 0 | 0.368844 | 0.884 | 0.784 | 0 T cells | RPL37A     |
| 12963 AC005842. | 0 | 0.363973 | 0.108 | 0.008 | 0 T cells | AC005842.1 |
| 12964 ANKRD55   | 0 | 0.357757 | 0.103 | 0.012 | 0 T cells | ANKRD55    |
| 12965 COX7C.5   | 0 | 0.357182 | 0.929 | 0.852 | 0 T cells | COX7C      |
| 12966 PCBP1.6   | 0 | 0.356514 | 0.907 | 0.837 | 0 T cells | PCBP1      |
| 12967 RACK1.6   | 0 | 0.351534 | 0.997 | 0.973 | 0 T cells | RACK1      |
| 12968 RPLP1.7   | 0 | 0.350225 | 1     | 0.994 | 0 T cells | RPLP1      |
| 12969 PLEKHB1   | 0 | 0.348075 | 0.12  | 0.02  | 0 T cells | PLEKHB1    |
| 12970 AC013264. | 0 | 0.346263 | 0.104 | 0.011 | 0 T cells | AC013264.1 |
| 12971 ICOS      | 0 | 0.343283 | 0.104 | 0.011 | 0 T cells | ICOS       |

|       |           |   |          |       |       |           |         |
|-------|-----------|---|----------|-------|-------|-----------|---------|
| 12972 | GRAP2.6   | 0 | 0.33964  | 0.203 | 0.074 | 0 T cells | GRAP2   |
| 12973 | CD247.8   | 0 | 0.337993 | 0.563 | 0.179 | 0 T cells | CD247   |
| 12974 | TMA7.5    | 0 | 0.337056 | 0.96  | 0.888 | 0 T cells | TMA7    |
| 12975 | DPP4      | 0 | 0.331739 | 0.104 | 0.011 | 0 T cells | DPP4    |
| 12976 | RPS19.4   | 0 | 0.328689 | 1     | 0.985 | 0 T cells | RPS19   |
| 12977 | CALM1.8   | 0 | 0.323142 | 0.924 | 0.827 | 0 T cells | CALM1   |
| 12978 | APBA2     | 0 | 0.319667 | 0.113 | 0.019 | 0 T cells | APBA2   |
| 12979 | PTPRC.5   | 0 | 0.317209 | 0.89  | 0.814 | 0 T cells | PTPRC   |
| 12980 | RPS7.5    | 0 | 0.316005 | 1     | 0.986 | 0 T cells | RPS7    |
| 12981 | RPL27.5   | 0 | 0.315671 | 0.973 | 0.928 | 0 T cells | RPL27   |
| 12982 | ITM2B.6   | 0 | 0.294079 | 0.939 | 0.823 | 0 T cells | ITM2B   |
| 12983 | RPL7A.5   | 0 | 0.287096 | 1     | 0.982 | 0 T cells | RPL7A   |
| 12984 | TMSB4X.7  | 0 | 0.283948 | 1     | 0.997 | 0 T cells | TMSB4X  |
| 12985 | RPL18A.6  | 0 | 0.260317 | 1     | 0.982 | 0 T cells | RPL18A  |
| 12986 | RPL35.6   | 0 | 0.254464 | 0.995 | 0.968 | 0 T cells | RPL35   |
| 12987 | MT-CO2.2  | 0 | -0.2523  | 1     | 0.996 | 0 T cells | MT-CO2  |
| 12988 | SH3TC1.2  | 0 | -0.29509 | 0.02  | 0.11  | 0 T cells | SH3TC1  |
| 12989 | NRM.1     | 0 | -0.29779 | 0.024 | 0.115 | 0 T cells | NRM     |
| 12990 | SLC43A2.1 | 0 | -0.29818 | 0.006 | 0.101 | 0 T cells | SLC43A2 |
| 12991 | RELT.1    | 0 | -0.30137 | 0.015 | 0.112 | 0 T cells | RELT    |
| 12992 | ENTPD1.2  | 0 | -0.30465 | 0.002 | 0.101 | 0 T cells | ENTPD1  |
| 12993 | CTNNA1.2  | 0 | -0.30595 | 0.009 | 0.117 | 0 T cells | CTNNA1  |
| 12994 | RRBP1.3   | 0 | -0.30916 | 0.038 | 0.143 | 0 T cells | RRBP1   |
| 12995 | MPST.4    | 0 | -0.31602 | 0.03  | 0.143 | 0 T cells | MPST    |
| 12996 | RNF135.1  | 0 | -0.31888 | 0.025 | 0.129 | 0 T cells | RNF135  |
| 12997 | WDR34.1   | 0 | -0.321   | 0.016 | 0.11  | 0 T cells | WDR34   |
| 12998 | LILRB4.2  | 0 | -0.32648 | 0.001 | 0.108 | 0 T cells | LILRB4  |
| 12999 | NRROS.5   | 0 | -0.32672 | 0.055 | 0.176 | 0 T cells | NRROS   |
| 13000 | CAPNS1.1  | 0 | -0.32934 | 0.057 | 0.169 | 0 T cells | CAPNS1  |
| 13001 | LPGAT1.2  | 0 | -0.33055 | 0.031 | 0.13  | 0 T cells | LPGAT1  |
| 13002 | RIPOR1.1  | 0 | -0.3335  | 0.022 | 0.119 | 0 T cells | RIPOR1  |
| 13003 | NOTCH2.1  | 0 | -0.33549 | 0.037 | 0.145 | 0 T cells | NOTCH2  |
| 13004 | DENND3.1  | 0 | -0.33734 | 0.004 | 0.105 | 0 T cells | DENND3  |
| 13005 | PLIN3.3   | 0 | -0.3387  | 0.074 | 0.201 | 0 T cells | PLIN3   |
| 13006 | GNB4.2    | 0 | -0.34556 | 0.002 | 0.109 | 0 T cells | GNB4    |
| 13007 | RASSF2.3  | 0 | -0.34844 | 0.049 | 0.16  | 0 T cells | RASSF2  |
| 13008 | KDM4B.1   | 0 | -0.34942 | 0.035 | 0.131 | 0 T cells | KDM4B   |
| 13009 | NUDT16.1  | 0 | -0.34952 | 0.04  | 0.159 | 0 T cells | NUDT16  |
| 13010 | NBPF14.2  | 0 | -0.35161 | 0.045 | 0.152 | 0 T cells | NBPF14  |
| 13011 | CLIC4.3   | 0 | -0.35758 | 0.002 | 0.112 | 0 T cells | CLIC4   |
| 13012 | TRAF4.1   | 0 | -0.36119 | 0.025 | 0.117 | 0 T cells | TRAF4   |
| 13013 | SEL1L3.2  | 0 | -0.36403 | 0.021 | 0.128 | 0 T cells | SEL1L3  |
| 13014 | SLC31A2.1 | 0 | -0.36482 | 0.013 | 0.109 | 0 T cells | SLC31A2 |
| 13015 | ACTN4.4   | 0 | -0.36669 | 0.073 | 0.207 | 0 T cells | ACTN4   |
| 13016 | STX11.2   | 0 | -0.36854 | 0.021 | 0.134 | 0 T cells | STX11   |
| 13017 | SEMA4B.1  | 0 | -0.36942 | 0.01  | 0.111 | 0 T cells | SEMA4B  |
| 13018 | CD86.1    | 0 | -0.37192 | 0.001 | 0.121 | 0 T cells | CD86    |

|                  |   |          |       |       |           |            |
|------------------|---|----------|-------|-------|-----------|------------|
| 13019 ARL11.2    | 0 | -0.37283 | 0.002 | 0.111 | 0 T cells | ARL11      |
| 13020 AGPAT2.1   | 0 | -0.37441 | 0.032 | 0.157 | 0 T cells | AGPAT2     |
| 13021 ODF3B.1    | 0 | -0.3775  | 0.012 | 0.133 | 0 T cells | ODF3B      |
| 13022 CR1.1      | 0 | -0.37887 | 0.022 | 0.116 | 0 T cells | CR1        |
| 13023 LILRA1.1   | 0 | -0.37975 | 0.001 | 0.1   | 0 T cells | LILRA1     |
| 13024 ADAM19.1   | 0 | -0.38101 | 0.01  | 0.116 | 0 T cells | ADAM19     |
| 13025 WDFY4.1    | 0 | -0.38215 | 0.001 | 0.105 | 0 T cells | WDFY4      |
| 13026 UNC93B1.1  | 0 | -0.38399 | 0.011 | 0.131 | 0 T cells | UNC93B1    |
| 13027 RALB.1     | 0 | -0.38449 | 0.039 | 0.16  | 0 T cells | RALB       |
| 13028 SNRNP25.1  | 0 | -0.38595 | 0.074 | 0.2   | 0 T cells | SNRNP25    |
| 13029 ATP2B1-AS1 | 0 | -0.38703 | 0.04  | 0.15  | 0 T cells | ATP2B1-AS1 |
| 13030 FAM49A.1   | 0 | -0.3884  | 0.008 | 0.135 | 0 T cells | FAM49A     |
| 13031 UBE2E2.2   | 0 | -0.38906 | 0.04  | 0.16  | 0 T cells | UBE2E2     |
| 13032 SMCO4.1    | 0 | -0.38998 | 0.02  | 0.14  | 0 T cells | SMCO4      |
| 13033 TUBB6.2    | 0 | -0.39162 | 0.001 | 0.109 | 0 T cells | TUBB6      |
| 13034 NAGK.2     | 0 | -0.39581 | 0.095 | 0.232 | 0 T cells | NAGK       |
| 13035 DEF8.3     | 0 | -0.39634 | 0.05  | 0.173 | 0 T cells | DEF8       |
| 13036 APOBEC3C   | 0 | -0.39829 | 0.066 | 0.198 | 0 T cells | APOBEC3C   |
| 13037 JAZF1.4    | 0 | -0.39953 | 0.039 | 0.154 | 0 T cells | JAZF1      |
| 13038 SEC14L1.3  | 0 | -0.40071 | 0.094 | 0.228 | 0 T cells | SEC14L1    |
| 13039 KMO.1      | 0 | -0.40586 | 0.003 | 0.108 | 0 T cells | KMO        |
| 13040 GSAP.4     | 0 | -0.40656 | 0.032 | 0.141 | 0 T cells | GSAP       |
| 13041 CLEC4A.1   | 0 | -0.4081  | 0.001 | 0.117 | 0 T cells | CLEC4A     |
| 13042 ERGIC1.3   | 0 | -0.40825 | 0.049 | 0.186 | 0 T cells | ERGIC1     |
| 13043 ITGAX.2    | 0 | -0.4099  | 0.003 | 0.116 | 0 T cells | ITGAX      |
| 13044 EVI2B.2    | 0 | -0.41023 | 0.078 | 0.219 | 0 T cells | EVI2B      |
| 13045 HDAC9.1    | 0 | -0.41068 | 0.003 | 0.115 | 0 T cells | HDAC9      |
| 13046 PHACTR1.2  | 0 | -0.41282 | 0.001 | 0.104 | 0 T cells | PHACTR1    |
| 13047 GUCD1.1    | 0 | -0.41372 | 0.041 | 0.158 | 0 T cells | GUCD1      |
| 13048 TNFAIP2.1  | 0 | -0.41445 | 0.001 | 0.101 | 0 T cells | TNFAIP2    |
| 13049 CLEC17A.1  | 0 | -0.4166  | 0     | 0.1   | 0 T cells | CLEC17A    |
| 13050 ALDH2.2    | 0 | -0.41763 | 0.003 | 0.115 | 0 T cells | ALDH2      |
| 13051 SMC6.1     | 0 | -0.4189  | 0.057 | 0.177 | 0 T cells | SMC6       |
| 13052 RELB.1     | 0 | -0.42013 | 0.062 | 0.193 | 0 T cells | RELB       |
| 13053 PYGL.3     | 0 | -0.42114 | 0.002 | 0.1   | 0 T cells | PYGL       |
| 13054 TNFSF13.1  | 0 | -0.42329 | 0.002 | 0.125 | 0 T cells | TNFSF13    |
| 13055 PRCP.2     | 0 | -0.42333 | 0.098 | 0.237 | 0 T cells | PRCP       |
| 13056 CPNE5.4    | 0 | -0.42454 | 0.001 | 0.121 | 0 T cells | CPNE5      |
| 13057 LRP1.1     | 0 | -0.42681 | 0.003 | 0.11  | 0 T cells | LRP1       |
| 13058 AC007384.1 | 0 | -0.42724 | 0.021 | 0.13  | 0 T cells | AC007384.1 |
| 13059 CLEC7A.1   | 0 | -0.42926 | 0.001 | 0.113 | 0 T cells | CLEC7A     |
| 13060 MAFB.1     | 0 | -0.4313  | 0.001 | 0.101 | 0 T cells | MAFB       |
| 13061 KYNU.2     | 0 | -0.432   | 0.001 | 0.139 | 0 T cells | KYNU       |
| 13062 ZNF385A.1  | 0 | -0.43225 | 0.002 | 0.127 | 0 T cells | ZNF385A    |
| 13063 PPP1R15A.1 | 0 | -0.43226 | 0.073 | 0.202 | 0 T cells | PPP1R15A   |
| 13064 CD81.1     | 0 | -0.4345  | 0.032 | 0.157 | 0 T cells | CD81       |
| 13065 SYVN1.4    | 0 | -0.43515 | 0.075 | 0.203 | 0 T cells | SYVN1      |

|                  |   |          |       |       |           |           |
|------------------|---|----------|-------|-------|-----------|-----------|
| 13066 PLEKHG1.1  | 0 | -0.43664 | 0.004 | 0.113 | 0 T cells | PLEKHG1   |
| 13067 CYSTM1.1   | 0 | -0.43699 | 0.027 | 0.12  | 0 T cells | CYSTM1    |
| 13068 ZNF296.1   | 0 | -0.4371  | 0.012 | 0.138 | 0 T cells | ZNF296    |
| 13069 EIF4EBP1.2 | 0 | -0.4382  | 0.051 | 0.203 | 0 T cells | EIF4EBP1  |
| 13070 TESC.4     | 0 | -0.4383  | 0.029 | 0.163 | 0 T cells | TESC      |
| 13071 BCL7A.2    | 0 | -0.43869 | 0.025 | 0.131 | 0 T cells | BCL7A     |
| 13072 MBD4.3     | 0 | -0.43915 | 0.153 | 0.299 | 0 T cells | MBD4      |
| 13073 IFT57.4    | 0 | -0.44278 | 0.09  | 0.214 | 0 T cells | IFT57     |
| 13074 PRR13.5    | 0 | -0.44311 | 0.604 | 0.717 | 0 T cells | PRR13     |
| 13075 MAP2K3.3   | 0 | -0.44505 | 0.148 | 0.304 | 0 T cells | MAP2K3    |
| 13076 ATP2B1.2   | 0 | -0.44686 | 0.131 | 0.282 | 0 T cells | ATP2B1    |
| 13077 TFEB.1     | 0 | -0.44945 | 0.006 | 0.14  | 0 T cells | TFEB      |
| 13078 BTLA.3     | 0 | -0.44973 | 0.047 | 0.15  | 0 T cells | BTLA      |
| 13079 MCTP2.2    | 0 | -0.45051 | 0.023 | 0.142 | 0 T cells | MCTP2     |
| 13080 SIDT2.2    | 0 | -0.45504 | 0.018 | 0.149 | 0 T cells | SIDT2     |
| 13081 VASP.4     | 0 | -0.45606 | 0.155 | 0.302 | 0 T cells | VASP      |
| 13082 PSMB9.5    | 0 | -0.45639 | 0.63  | 0.739 | 0 T cells | PSMB9     |
| 13083 BID.3      | 0 | -0.45747 | 0.103 | 0.237 | 0 T cells | BID       |
| 13084 GM2A.2     | 0 | -0.45954 | 0.022 | 0.154 | 0 T cells | GM2A      |
| 13085 SLC16A3.4  | 0 | -0.46106 | 0.046 | 0.191 | 0 T cells | SLC16A3   |
| 13086 PRAM1.2    | 0 | -0.46165 | 0.003 | 0.125 | 0 T cells | PRAM1     |
| 13087 C11orf24.3 | 0 | -0.46563 | 0.04  | 0.184 | 0 T cells | C11orf24  |
| 13088 BASP1.2    | 0 | -0.46648 | 0.001 | 0.115 | 0 T cells | BASP1     |
| 13089 SH3BGRL.6  | 0 | -0.46707 | 0.487 | 0.631 | 0 T cells | SH3BGRL   |
| 13090 ATG16L2.3  | 0 | -0.473   | 0.087 | 0.234 | 0 T cells | ATG16L2   |
| 13091 CHD9.3     | 0 | -0.4784  | 0.088 | 0.246 | 0 T cells | CHD9      |
| 13092 PLAUR.1    | 0 | -0.47933 | 0.005 | 0.12  | 0 T cells | PLAUR     |
| 13093 APPL1.3    | 0 | -0.48046 | 0.142 | 0.3   | 0 T cells | APPL1     |
| 13094 SIGLEC10.2 | 0 | -0.48135 | 0.001 | 0.139 | 0 T cells | SIGLEC10  |
| 13095 NADK.3     | 0 | -0.48235 | 0.052 | 0.213 | 0 T cells | NADK      |
| 13096 METTL7A.2  | 0 | -0.48258 | 0.004 | 0.156 | 0 T cells | METTL7A   |
| 13097 DAPP1.3    | 0 | -0.48326 | 0.031 | 0.175 | 0 T cells | DAPP1     |
| 13098 CD1D.2     | 0 | -0.48348 | 0     | 0.142 | 0 T cells | CD1D      |
| 13099 STAP1.2    | 0 | -0.48453 | 0.008 | 0.13  | 0 T cells | STAP1     |
| 13100 RHBDF2.3   | 0 | -0.48596 | 0.032 | 0.184 | 0 T cells | RHBDF2    |
| 13101 TBXAS1.3   | 0 | -0.48689 | 0.011 | 0.145 | 0 T cells | TBXAS1    |
| 13102 RNASET2.5  | 0 | -0.48903 | 0.542 | 0.668 | 0 T cells | RNASET2   |
| 13103 POMP.5     | 0 | -0.4894  | 0.391 | 0.547 | 0 T cells | POMP      |
| 13104 PTPRE.6    | 0 | -0.48956 | 0.074 | 0.201 | 0 T cells | PTPRE     |
| 13105 RHOA.6     | 0 | -0.49142 | 0.854 | 0.896 | 0 T cells | RHOA      |
| 13106 SH3BP2.4   | 0 | -0.4916  | 0.046 | 0.197 | 0 T cells | SH3BP2    |
| 13107 SNX22.2    | 0 | -0.49221 | 0.003 | 0.12  | 0 T cells | SNX22     |
| 13108 YBX3.4     | 0 | -0.4932  | 0.042 | 0.169 | 0 T cells | YBX3      |
| 13109 FCHSD2.2   | 0 | -0.49547 | 0.038 | 0.177 | 0 T cells | FCHSD2    |
| 13110 RAB11FIP1  | 0 | -0.4956  | 0.031 | 0.175 | 0 T cells | RAB11FIP1 |
| 13111 CYB5R3.3   | 0 | -0.49695 | 0.164 | 0.331 | 0 T cells | CYB5R3    |
| 13112 GLIPR2.6   | 0 | -0.49725 | 0.133 | 0.272 | 0 T cells | GLIPR2    |



|                  |   |          |       |       |           |          |
|------------------|---|----------|-------|-------|-----------|----------|
| 13113 LRRK2.1    | 0 | -0.49733 | 0.002 | 0.136 | 0 T cells | LRRK2    |
| 13114 DRAM2.2    | 0 | -0.49816 | 0.145 | 0.311 | 0 T cells | DRAM2    |
| 13115 IFI16.6    | 0 | -0.49929 | 0.227 | 0.399 | 0 T cells | IFI16    |
| 13116 PPK.3      | 0 | -0.5003  | 0.059 | 0.213 | 0 T cells | PPK      |
| 13117 RB1.1      | 0 | -0.50163 | 0.083 | 0.244 | 0 T cells | RB1      |
| 13118 NAIP.1     | 0 | -0.50265 | 0.022 | 0.13  | 0 T cells | NAIP     |
| 13119 ITGAM.3    | 0 | -0.50295 | 0.023 | 0.152 | 0 T cells | ITGAM    |
| 13120 JUP.2      | 0 | -0.50336 | 0.003 | 0.124 | 0 T cells | JUP      |
| 13121 LSP1.6     | 0 | -0.50432 | 0.782 | 0.858 | 0 T cells | LSP1     |
| 13122 FAM3C.4    | 0 | -0.50948 | 0.041 | 0.172 | 0 T cells | FAM3C    |
| 13123 LILRA2.1   | 0 | -0.51241 | 0.001 | 0.132 | 0 T cells | LILRA2   |
| 13124 CD53.6     | 0 | -0.51405 | 0.526 | 0.671 | 0 T cells | CD53     |
| 13125 MYL6.6     | 0 | -0.51456 | 0.946 | 0.949 | 0 T cells | MYL6     |
| 13126 C16orf74.3 | 0 | -0.51544 | 0.047 | 0.178 | 0 T cells | C16orf74 |
| 13127 IRF5.2     | 0 | -0.5158  | 0.006 | 0.172 | 0 T cells | IRF5     |
| 13128 BLOC1S2.3  | 0 | -0.51619 | 0.207 | 0.379 | 0 T cells | BLOC1S2  |
| 13129 LAMTOR5.   | 0 | -0.51779 | 0.309 | 0.494 | 0 T cells | LAMTOR5  |
| 13130 PRKCD.3    | 0 | -0.51857 | 0.043 | 0.219 | 0 T cells | PRKCD    |
| 13131 GSN.4      | 0 | -0.51892 | 0.007 | 0.146 | 0 T cells | GSN      |
| 13132 FCRL2.1    | 0 | -0.51989 | 0.001 | 0.126 | 0 T cells | FCRL2    |
| 13133 IFNGR1.4   | 0 | -0.52151 | 0.139 | 0.314 | 0 T cells | IFNGR1   |
| 13134 SP100.5    | 0 | -0.52279 | 0.396 | 0.561 | 0 T cells | SP100    |
| 13135 ARHGAP24   | 0 | -0.52305 | 0.001 | 0.134 | 0 T cells | ARHGAP24 |
| 13136 SLC2A6.1   | 0 | -0.52522 | 0.016 | 0.161 | 0 T cells | SLC2A6   |
| 13137 LSM10.2    | 0 | -0.52543 | 0.205 | 0.391 | 0 T cells | LSM10    |
| 13138 ASGR1.1    | 0 | -0.52648 | 0.001 | 0.116 | 0 T cells | ASGR1    |
| 13139 ARHGAP17   | 0 | -0.52906 | 0.099 | 0.248 | 0 T cells | ARHGAP17 |
| 13140 MOB1A.4    | 0 | -0.53008 | 0.235 | 0.424 | 0 T cells | MOB1A    |
| 13141 WSB1.3     | 0 | -0.53134 | 0.252 | 0.419 | 0 T cells | WSB1     |
| 13142 NUP214.4   | 0 | -0.53418 | 0.08  | 0.221 | 0 T cells | NUP214   |
| 13143 PLSCR1.4   | 0 | -0.539   | 0.093 | 0.251 | 0 T cells | PLSCR1   |
| 13144 TLR10.1    | 0 | -0.53949 | 0.001 | 0.136 | 0 T cells | TLR10    |
| 13145 SP140.5    | 0 | -0.53958 | 0.076 | 0.236 | 0 T cells | SP140    |
| 13146 CD300A.7   | 0 | -0.54043 | 0.084 | 0.217 | 0 T cells | CD300A   |
| 13147 DOK3.1     | 0 | -0.54127 | 0.002 | 0.174 | 0 T cells | DOK3     |
| 13148 THEMIS2.4  | 0 | -0.54339 | 0.086 | 0.255 | 0 T cells | THEMIS2  |
| 13149 CX3CR1.4   | 0 | -0.54744 | 0.047 | 0.157 | 0 T cells | CX3CR1   |
| 13150 PARVB.4    | 0 | -0.54853 | 0.023 | 0.185 | 0 T cells | PARVB    |
| 13151 FCGR2A.2   | 0 | -0.55047 | 0.002 | 0.124 | 0 T cells | FCGR2A   |
| 13152 CXCR5.1    | 0 | -0.55153 | 0.009 | 0.138 | 0 T cells | CXCR5    |
| 13153 IQGAP1.5   | 0 | -0.55156 | 0.211 | 0.396 | 0 T cells | IQGAP1   |
| 13154 HLA-DOA.1  | 0 | -0.55223 | 0.011 | 0.147 | 0 T cells | HLA-DOA  |
| 13155 FES.3      | 0 | -0.55362 | 0.004 | 0.17  | 0 T cells | FES      |
| 13156 SHMT2.5    | 0 | -0.55505 | 0.217 | 0.387 | 0 T cells | SHMT2    |
| 13157 ADK.4      | 0 | -0.55627 | 0.143 | 0.289 | 0 T cells | ADK      |
| 13158 GGA2.3     | 0 | -0.55673 | 0.061 | 0.223 | 0 T cells | GGA2     |
| 13159 GNAI2.4    | 0 | -0.55833 | 0.196 | 0.362 | 0 T cells | GNAI2    |

|                 |   |          |       |       |           |           |
|-----------------|---|----------|-------|-------|-----------|-----------|
| 13160 DDAH2.5   | 0 | -0.55919 | 0.072 | 0.254 | 0 T cells | DDAH2     |
| 13161 BST2.6    | 0 | -0.5598  | 0.359 | 0.53  | 0 T cells | BST2      |
| 13162 CD36.2    | 0 | -0.5602  | 0.002 | 0.117 | 0 T cells | CD36      |
| 13163 TMEM154.  | 0 | -0.56179 | 0.076 | 0.246 | 0 T cells | TMEM154   |
| 13164 SH3BP5.5  | 0 | -0.56285 | 0.155 | 0.33  | 0 T cells | SH3BP5    |
| 13165 CPPED1.3  | 0 | -0.56379 | 0.021 | 0.171 | 0 T cells | CPPED1    |
| 13166 PARVG.5   | 0 | -0.56423 | 0.243 | 0.43  | 0 T cells | PARVG     |
| 13167 WASHC4.5  | 0 | -0.56563 | 0.116 | 0.293 | 0 T cells | WASHC4    |
| 13168 CCR6.1    | 0 | -0.56583 | 0.016 | 0.147 | 0 T cells | CCR6      |
| 13169 CD52.8    | 0 | -0.56653 | 0.82  | 0.832 | 0 T cells | CD52      |
| 13170 RHOB.2    | 0 | -0.56868 | 0.014 | 0.139 | 0 T cells | RHOB      |
| 13171 HSBP1.3   | 0 | -0.573   | 0.195 | 0.377 | 0 T cells | HSBP1     |
| 13172 LILRB3.1  | 0 | -0.578   | 0.002 | 0.137 | 0 T cells | LILRB3    |
| 13173 IGFBP7.4  | 0 | -0.58027 | 0.001 | 0.12  | 0 T cells | IGFBP7    |
| 13174 MIS18BP1. | 0 | -0.58254 | 0.096 | 0.293 | 0 T cells | MIS18BP1  |
| 13175 UVRAG.4   | 0 | -0.58396 | 0.1   | 0.28  | 0 T cells | UVRAG     |
| 13176 PLEKHA2.3 | 0 | -0.58505 | 0.041 | 0.195 | 0 T cells | PLEKHA2   |
| 13177 CDCA7L.5  | 0 | -0.58876 | 0.094 | 0.243 | 0 T cells | CDCA7L    |
| 13178 DBI.5     | 0 | -0.59098 | 0.53  | 0.679 | 0 T cells | DBI       |
| 13179 LAMTOR1.  | 0 | -0.59235 | 0.362 | 0.543 | 0 T cells | LAMTOR1   |
| 13180 CD1C.2    | 0 | -0.59262 | 0     | 0.115 | 0 T cells | CD1C      |
| 13181 NT5C.6    | 0 | -0.59462 | 0.283 | 0.484 | 0 T cells | NT5C      |
| 13182 IGSF6.1   | 0 | -0.59862 | 0.003 | 0.146 | 0 T cells | IGSF6     |
| 13183 TPD52.4   | 0 | -0.59893 | 0.042 | 0.202 | 0 T cells | TPD52     |
| 13184 TNFRSF13C | 0 | -0.60008 | 0.004 | 0.151 | 0 T cells | TNFRSF13C |
| 13185 RNF141.5  | 0 | -0.60683 | 0.069 | 0.252 | 0 T cells | RNF141    |
| 13186 PIK3AP1.2 | 0 | -0.60837 | 0.009 | 0.193 | 0 T cells | PIK3AP1   |
| 13187 PLAC8.5   | 0 | -0.60943 | 0.44  | 0.595 | 0 T cells | PLAC8     |
| 13188 TLN1.6    | 0 | -0.60968 | 0.154 | 0.34  | 0 T cells | TLN1      |
| 13189 PAX5.2    | 0 | -0.61166 | 0.001 | 0.149 | 0 T cells | PAX5      |
| 13190 ZFP36L1.5 | 0 | -0.6125  | 0.477 | 0.61  | 0 T cells | ZFP36L1   |
| 13191 NFE2.4    | 0 | -0.61467 | 0.002 | 0.129 | 0 T cells | NFE2      |
| 13192 ATP6VOC.2 | 0 | -0.61495 | 0.515 | 0.641 | 0 T cells | ATP6VOC   |
| 13193 PRKCB.5   | 0 | -0.61513 | 0.1   | 0.298 | 0 T cells | PRKCB     |
| 13194 CNPY3.2   | 0 | -0.61555 | 0.357 | 0.555 | 0 T cells | CNPY3     |
| 13195 BLOC1S1.3 | 0 | -0.61698 | 0.336 | 0.525 | 0 T cells | BLOC1S1   |
| 13196 EFHD2.7   | 0 | -0.6181  | 0.068 | 0.246 | 0 T cells | EFHD2     |
| 13197 CEBPD.2   | 0 | -0.6181  | 0.011 | 0.132 | 0 T cells | CEBPD     |
| 13198 PLP2.4    | 0 | -0.62208 | 0.282 | 0.476 | 0 T cells | PLP2      |
| 13199 QRSL1.4   | 0 | -0.62378 | 0.054 | 0.216 | 0 T cells | QRSL1     |
| 13200 CMTM6.4   | 0 | -0.62613 | 0.228 | 0.437 | 0 T cells | CMTM6     |
| 13201 AP1S2.4   | 0 | -0.62699 | 0.186 | 0.353 | 0 T cells | AP1S2     |
| 13202 MSRB1.5   | 0 | -0.62933 | 0.044 | 0.194 | 0 T cells | MSRB1     |
| 13203 CD83.2    | 0 | -0.63217 | 0.01  | 0.147 | 0 T cells | CD83      |
| 13204 BIRC3.3   | 0 | -0.6322  | 0.096 | 0.25  | 0 T cells | BIRC3     |
| 13205 PLEKHF2.6 | 0 | -0.63299 | 0.092 | 0.262 | 0 T cells | PLEKHF2   |
| 13206 FGD2.2    | 0 | -0.63336 | 0.001 | 0.191 | 0 T cells | FGD2      |

|                  |   |          |       |       |           |            |
|------------------|---|----------|-------|-------|-----------|------------|
| 13207 CIITA.1    | 0 | -0.63681 | 0.002 | 0.171 | 0 T cells | CIITA      |
| 13208 SCPEP1.3   | 0 | -0.63761 | 0.049 | 0.25  | 0 T cells | SCPEP1     |
| 13209 TNFRSF1B.  | 0 | -0.63845 | 0.078 | 0.244 | 0 T cells | TNFRSF1B   |
| 13210 C5AR1.1    | 0 | -0.64101 | 0.002 | 0.125 | 0 T cells | C5AR1      |
| 13211 PKIG.2     | 0 | -0.64429 | 0.013 | 0.171 | 0 T cells | PKIG       |
| 13212 REEP5.7    | 0 | -0.64809 | 0.215 | 0.455 | 0 T cells | REEP5      |
| 13213 RGS19.5    | 0 | -0.65011 | 0.308 | 0.523 | 0 T cells | RGS19      |
| 13214 LGALS9.5   | 0 | -0.65433 | 0.054 | 0.247 | 0 T cells | LGALS9     |
| 13215 CTSD.5     | 0 | -0.65483 | 0.058 | 0.188 | 0 T cells | CTSD       |
| 13216 OAS1.5     | 0 | -0.65625 | 0.065 | 0.265 | 0 T cells | OAS1       |
| 13217 PNOC.1     | 0 | -0.65921 | 0     | 0.169 | 0 T cells | PNOC       |
| 13218 SLC7A7.1   | 0 | -0.66306 | 0.003 | 0.157 | 0 T cells | SLC7A7     |
| 13219 RHOC.6     | 0 | -0.66414 | 0.035 | 0.192 | 0 T cells | RHOC       |
| 13220 AL034397.  | 0 | -0.66698 | 0.002 | 0.168 | 0 T cells | AL034397.3 |
| 13221 HMOX1.2    | 0 | -0.66937 | 0.004 | 0.161 | 0 T cells | HMOX1      |
| 13222 AHNAK.6    | 0 | -0.67181 | 0.156 | 0.375 | 0 T cells | AHNAK      |
| 13223 CD82.6     | 0 | -0.67341 | 0.106 | 0.28  | 0 T cells | CD82       |
| 13224 FAM96A.4   | 0 | -0.67362 | 0.245 | 0.476 | 0 T cells | FAM96A     |
| 13225 TPM4.7     | 0 | -0.67522 | 0.152 | 0.35  | 0 T cells | TPM4       |
| 13226 SH3BGR1.3  | 0 | -0.67579 | 0.933 | 0.949 | 0 T cells | SH3BGR1.3  |
| 13227 BTG2.4     | 0 | -0.67654 | 0.194 | 0.387 | 0 T cells | BTG2       |
| 13228 DUSP6.1    | 0 | -0.68021 | 0.004 | 0.151 | 0 T cells | DUSP6      |
| 13229 CTSZ.3     | 0 | -0.68227 | 0.011 | 0.215 | 0 T cells | CTSZ       |
| 13230 ORAI2.3    | 0 | -0.68423 | 0.045 | 0.241 | 0 T cells | ORAI2      |
| 13231 PRELID1.6  | 0 | -0.68518 | 0.45  | 0.582 | 0 T cells | PRELID1    |
| 13232 C19orf38.2 | 0 | -0.68543 | 0.01  | 0.187 | 0 T cells | C19orf38   |
| 13233 NFKBIA.4   | 0 | -0.68708 | 0.25  | 0.417 | 0 T cells | NFKBIA     |
| 13234 TAGLN2.6   | 0 | -0.6872  | 0.715 | 0.838 | 0 T cells | TAGLN2     |
| 13235 AGTRAP.6   | 0 | -0.6879  | 0.154 | 0.312 | 0 T cells | AGTRAP     |
| 13236 CPVL.1     | 0 | -0.68794 | 0.001 | 0.142 | 0 T cells | CPVL       |
| 13237 CCDC50.2   | 0 | -0.68901 | 0.022 | 0.217 | 0 T cells | CCDC50     |
| 13238 GRINA.4    | 0 | -0.69015 | 0.168 | 0.353 | 0 T cells | GRINA      |
| 13239 SYPL1.6    | 0 | -0.69062 | 0.29  | 0.452 | 0 T cells | SYPL1      |
| 13240 GNG7.4     | 0 | -0.691   | 0.014 | 0.199 | 0 T cells | GNG7       |
| 13241 LILRB1.1   | 0 | -0.69104 | 0.01  | 0.18  | 0 T cells | LILRB1     |
| 13242 BCL11A.4   | 0 | -0.693   | 0.01  | 0.188 | 0 T cells | BCL11A     |
| 13243 LYST.3     | 0 | -0.69637 | 0.072 | 0.273 | 0 T cells | LYST       |
| 13244 RAC1.5     | 0 | -0.70408 | 0.426 | 0.578 | 0 T cells | RAC1       |
| 13245 TCIRG1.5   | 0 | -0.70736 | 0.157 | 0.365 | 0 T cells | TCIRG1     |
| 13246 GNG5.4     | 0 | -0.70738 | 0.57  | 0.708 | 0 T cells | GNG5       |
| 13247 CFP.7      | 0 | -0.71104 | 0.056 | 0.18  | 0 T cells | CFP        |
| 13248 WARS.4     | 0 | -0.71233 | 0.066 | 0.21  | 0 T cells | WARS       |
| 13249 CAST.5     | 0 | -0.71237 | 0.248 | 0.48  | 0 T cells | CAST       |
| 13250 BLVRB.5    | 0 | -0.71704 | 0.062 | 0.221 | 0 T cells | BLVRB      |
| 13251 DERL3.2    | 0 | -0.71824 | 0.002 | 0.142 | 0 T cells | DERL3      |
| 13252 GLIPR1.5   | 0 | -0.72004 | 0.121 | 0.355 | 0 T cells | GLIPR1     |
| 13253 ATP6V0D1   | 0 | -0.72095 | 0.209 | 0.446 | 0 T cells | ATP6V0D1   |

|                  |   |          |       |       |           |           |
|------------------|---|----------|-------|-------|-----------|-----------|
| 13254 RCSD1.3    | 0 | -0.72121 | 0.332 | 0.544 | 0 T cells | RCSD1     |
| 13255 LTA4H.6    | 0 | -0.72573 | 0.256 | 0.455 | 0 T cells | LTA4H     |
| 13256 HK3.1      | 0 | -0.72796 | 0.001 | 0.153 | 0 T cells | HK3       |
| 13257 MAP3K8.5   | 0 | -0.73153 | 0.027 | 0.242 | 0 T cells | MAP3K8    |
| 13258 HSH2D.6    | 0 | -0.73699 | 0.069 | 0.289 | 0 T cells | HSH2D     |
| 13259 CARD16.6   | 0 | -0.7375  | 0.305 | 0.491 | 0 T cells | CARD16    |
| 13260 SPIB.2     | 0 | -0.74406 | 0.001 | 0.175 | 0 T cells | SPIB      |
| 13261 TSPAN3.7   | 0 | -0.74638 | 0.108 | 0.321 | 0 T cells | TSPAN3    |
| 13262 MYO1F.7    | 0 | -0.74679 | 0.073 | 0.281 | 0 T cells | MYO1F     |
| 13263 ASAH1.4    | 0 | -0.74719 | 0.197 | 0.407 | 0 T cells | ASAH1     |
| 13264 RAB24.3    | 0 | -0.74741 | 0.16  | 0.395 | 0 T cells | RAB24     |
| 13265 PLCG2.3    | 0 | -0.74744 | 0.009 | 0.238 | 0 T cells | PLCG2     |
| 13266 GLUL.5     | 0 | -0.74753 | 0.082 | 0.272 | 0 T cells | GLUL      |
| 13267 C1orf162.6 | 0 | -0.74906 | 0.273 | 0.475 | 0 T cells | C1orf162  |
| 13268 POU2AF1.5  | 0 | -0.75144 | 0.005 | 0.198 | 0 T cells | POU2AF1   |
| 13269 REL.6      | 0 | -0.75836 | 0.12  | 0.36  | 0 T cells | REL       |
| 13270 LAPTM5.5   | 0 | -0.75875 | 0.84  | 0.906 | 0 T cells | LAPTM5    |
| 13271 PILRA.1    | 0 | -0.75924 | 0.003 | 0.151 | 0 T cells | PILRA     |
| 13272 AFF3.6     | 0 | -0.76336 | 0.031 | 0.215 | 0 T cells | AFF3      |
| 13273 EZR.5      | 0 | -0.76642 | 0.337 | 0.52  | 0 T cells | EZR       |
| 13274 CLEC12A.2  | 0 | -0.76938 | 0.003 | 0.165 | 0 T cells | CLEC12A   |
| 13275 TNFSF13B.  | 0 | -0.77091 | 0.015 | 0.183 | 0 T cells | TNFSF13B  |
| 13276 SNX10.4    | 0 | -0.77535 | 0.043 | 0.285 | 0 T cells | SNX10     |
| 13277 GRB2.3     | 0 | -0.77741 | 0.288 | 0.55  | 0 T cells | GRB2      |
| 13278 SKAP2.3    | 0 | -0.77784 | 0.026 | 0.274 | 0 T cells | SKAP2     |
| 13279 PGD.7      | 0 | -0.78256 | 0.144 | 0.306 | 0 T cells | PGD       |
| 13280 FCGR2B.5   | 0 | -0.78308 | 0.002 | 0.215 | 0 T cells | FCGR2B    |
| 13281 ALOX5AP.7  | 0 | -0.78486 | 0.286 | 0.447 | 0 T cells | ALOX5AP   |
| 13282 H3F3A.4    | 0 | -0.78546 | 0.938 | 0.964 | 0 T cells | H3F3A     |
| 13283 ADAM28.3   | 0 | -0.7869  | 0.001 | 0.182 | 0 T cells | ADAM28    |
| 13284 MPEG1.3    | 0 | -0.78725 | 0.001 | 0.211 | 0 T cells | MPEG1     |
| 13285 CD180.3    | 0 | -0.80588 | 0.001 | 0.216 | 0 T cells | CD180     |
| 13286 TALDO1.4   | 0 | -0.80866 | 0.417 | 0.56  | 0 T cells | TALDO1    |
| 13287 LRRC25.1   | 0 | -0.80956 | 0.002 | 0.176 | 0 T cells | LRRC25    |
| 13288 SCIMP.6    | 0 | -0.81166 | 0.001 | 0.214 | 0 T cells | SCIMP     |
| 13289 LINC02397  | 0 | -0.8132  | 0.001 | 0.188 | 0 T cells | LINC02397 |
| 13290 MTPN.6     | 0 | -0.81329 | 0.224 | 0.5   | 0 T cells | MTPN      |
| 13291 NCF2.3     | 0 | -0.82056 | 0.005 | 0.197 | 0 T cells | NCF2      |
| 13292 TMEM176A   | 0 | -0.82489 | 0.002 | 0.145 | 0 T cells | TMEM176A  |
| 13293 ANXA4.4    | 0 | -0.8264  | 0.037 | 0.286 | 0 T cells | ANXA4     |
| 13294 GAPT.4     | 0 | -0.82756 | 0.005 | 0.214 | 0 T cells | GAPT      |
| 13295 SNX3.4     | 0 | -0.83232 | 0.418 | 0.668 | 0 T cells | SNX3      |
| 13296 SLC25A37.  | 0 | -0.8379  | 0.053 | 0.175 | 0 T cells | SLC25A37  |
| 13297 ZEB2.5     | 0 | -0.83882 | 0.031 | 0.284 | 0 T cells | ZEB2      |
| 13298 ATP6V0B.4  | 0 | -0.84353 | 0.343 | 0.57  | 0 T cells | ATP6V0B   |
| 13299 LGALS2.1   | 0 | -0.85299 | 0.001 | 0.1   | 0 T cells | LGALS2    |
| 13300 MTSS1.5    | 0 | -0.854   | 0.041 | 0.273 | 0 T cells | MTSS1     |

|       |            |   |          |       |       |           |          |
|-------|------------|---|----------|-------|-------|-----------|----------|
| 13301 | UBE2J1.6   | 0 | -0.85529 | 0.145 | 0.383 | 0 T cells | UBE2J1   |
| 13302 | FGL2.2     | 0 | -0.85529 | 0.017 | 0.19  | 0 T cells | FGL2     |
| 13303 | ARPC3.5    | 0 | -0.85702 | 0.866 | 0.952 | 0 T cells | ARPC3    |
| 13304 | RGS2.2     | 0 | -0.85906 | 0.011 | 0.166 | 0 T cells | RGS2     |
| 13305 | SLC11A1.2  | 0 | -0.8654  | 0.013 | 0.182 | 0 T cells | SLC11A1  |
| 13306 | IGHG2.2    | 0 | -0.86837 | 0.003 | 0.121 | 0 T cells | IGHG2    |
| 13307 | CDA.1      | 0 | -0.86944 | 0.002 | 0.155 | 0 T cells | CDA      |
| 13308 | GABARAP.1  | 0 | -0.87053 | 0.779 | 0.871 | 0 T cells | GABARAP  |
| 13309 | HHEX.5     | 0 | -0.87468 | 0.002 | 0.246 | 0 T cells | HHEX     |
| 13310 | RNASE6.4   | 0 | -0.87626 | 0.004 | 0.233 | 0 T cells | RNASE6   |
| 13311 | BCL2A1.5   | 0 | -0.87998 | 0.093 | 0.249 | 0 T cells | BCL2A1   |
| 13312 | RAB31.5    | 0 | -0.88588 | 0.003 | 0.23  | 0 T cells | RAB31    |
| 13313 | MARCH1.5   | 0 | -0.90349 | 0.002 | 0.259 | 0 T cells | Mar-01   |
| 13314 | CD63.6     | 0 | -0.9257  | 0.123 | 0.352 | 0 T cells | CD63     |
| 13315 | ANXA5.5    | 0 | -0.92873 | 0.161 | 0.399 | 0 T cells | ANXA5    |
| 13316 | ZFP36.3    | 0 | -0.93462 | 0.509 | 0.65  | 0 T cells | ZFP36    |
| 13317 | RNF130.6   | 0 | -0.93638 | 0.056 | 0.266 | 0 T cells | RNF130   |
| 13318 | BLNK.5     | 0 | -0.94959 | 0.001 | 0.253 | 0 T cells | BLNK     |
| 13319 | PPP1R14A.1 | 0 | -0.95645 | 0.001 | 0.198 | 0 T cells | PPP1R14A |
| 13320 | POLD4.5    | 0 | -0.96044 | 0.426 | 0.69  | 0 T cells | POLD4    |
| 13321 | FAM30A.5   | 0 | -0.96091 | 0.005 | 0.197 | 0 T cells | FAM30A   |
| 13322 | CTSH.7     | 0 | -0.97049 | 0.02  | 0.311 | 0 T cells | CTSH     |
| 13323 | MS4A7.1    | 0 | -0.97354 | 0.001 | 0.148 | 0 T cells | MS4A7    |
| 13324 | CXXC5.7    | 0 | -0.97454 | 0.015 | 0.285 | 0 T cells | CXXC5    |
| 13325 | TCF4.6     | 0 | -0.97683 | 0.005 | 0.263 | 0 T cells | TCF4     |
| 13326 | PLBD1.2    | 0 | -0.98159 | 0.005 | 0.158 | 0 T cells | PLBD1    |
| 13327 | CD22.6     | 0 | -0.99881 | 0.001 | 0.237 | 0 T cells | CD22     |
| 13328 | TSPAN13.5  | 0 | -1.00177 | 0.001 | 0.244 | 0 T cells | TSPAN13  |
| 13329 | APLP2.3    | 0 | -1.02234 | 0.046 | 0.316 | 0 T cells | APLP2    |
| 13330 | FCRL1.5    | 0 | -1.03024 | 0.002 | 0.248 | 0 T cells | FCRL1    |
| 13331 | EAf2.5     | 0 | -1.04546 | 0.028 | 0.317 | 0 T cells | EAf2     |
| 13332 | OAZ1.5     | 0 | -1.04732 | 0.912 | 0.968 | 0 T cells | OAZ1     |
| 13333 | PLD4.5     | 0 | -1.04854 | 0.001 | 0.223 | 0 T cells | PLD4     |
| 13334 | CSTA.2     | 0 | -1.05322 | 0.003 | 0.182 | 0 T cells | CSTA     |
| 13335 | NCF4.6     | 0 | -1.0607  | 0.017 | 0.329 | 0 T cells | NCF4     |
| 13336 | MS4A6A.2   | 0 | -1.06092 | 0.009 | 0.179 | 0 T cells | MS4A6A   |
| 13337 | LILRB2.2   | 0 | -1.06503 | 0.002 | 0.18  | 0 T cells | LILRB2   |
| 13338 | RUBCNL.4   | 0 | -1.07054 | 0.001 | 0.275 | 0 T cells | RUBCNL   |
| 13339 | BTK.5      | 0 | -1.07123 | 0.002 | 0.335 | 0 T cells | BTK      |
| 13340 | POU2F2.6   | 0 | -1.07529 | 0.082 | 0.411 | 0 T cells | POU2F2   |
| 13341 | HLA-DOB.5  | 0 | -1.07982 | 0.001 | 0.263 | 0 T cells | HLA-DOB  |
| 13342 | FPR1.2     | 0 | -1.08011 | 0.002 | 0.184 | 0 T cells | FPR1     |
| 13343 | LILRA5.2   | 0 | -1.0855  | 0.003 | 0.171 | 0 T cells | LILRA5   |
| 13344 | PLEK.6     | 0 | -1.09828 | 0.075 | 0.42  | 0 T cells | PLEK     |
| 13345 | PTPN6.5    | 0 | -1.10844 | 0.479 | 0.747 | 0 T cells | PTPN6    |
| 13346 | LY86.6     | 0 | -1.11041 | 0.011 | 0.333 | 0 T cells | LY86     |
| 13347 | HERPUD1.1  | 0 | -1.1126  | 0.214 | 0.515 | 0 T cells | HERPUD1  |

|                  |   |          |       |       |           |          |
|------------------|---|----------|-------|-------|-----------|----------|
| 13348 IFNGR2.6   | 0 | -1.11521 | 0.163 | 0.515 | 0 T cells | IFNGR2   |
| 13349 SMIM14.6   | 0 | -1.11547 | 0.047 | 0.34  | 0 T cells | SMIM14   |
| 13350 COTL1.5    | 0 | -1.11704 | 0.557 | 0.629 | 0 T cells | COTL1    |
| 13351 BLK.7      | 0 | -1.11901 | 0.007 | 0.286 | 0 T cells | BLK      |
| 13352 NPC2.3     | 0 | -1.13008 | 0.174 | 0.463 | 0 T cells | NPC2     |
| 13353 PYCARD.5   | 0 | -1.13042 | 0.261 | 0.487 | 0 T cells | PYCARD   |
| 13354 SMIM25.2   | 0 | -1.13086 | 0.002 | 0.159 | 0 T cells | SMIM25   |
| 13355 IGHV5-78.4 | 0 | -1.13528 | 0.001 | 0.255 | 0 T cells | IGHV5-78 |
| 13356 LGALS3.5   | 0 | -1.13698 | 0.018 | 0.236 | 0 T cells | LGALS3   |
| 13357 CD24.6     | 0 | -1.14663 | 0.001 | 0.252 | 0 T cells | CD24     |
| 13358 SWAP70.5   | 0 | -1.14937 | 0.023 | 0.339 | 0 T cells | SWAP70   |
| 13359 CYB561A3.  | 0 | -1.15136 | 0.115 | 0.397 | 0 T cells | CYB561A3 |
| 13360 STX7.5     | 0 | -1.15509 | 0.057 | 0.408 | 0 T cells | STX7     |
| 13361 CSF3R.1    | 0 | -1.16229 | 0.003 | 0.151 | 0 T cells | CSF3R    |
| 13362 SRGN.7     | 0 | -1.18432 | 0.354 | 0.463 | 0 T cells | SRGN     |
| 13363 GCA.5      | 0 | -1.19196 | 0.089 | 0.334 | 0 T cells | GCA      |
| 13364 CYBA.8     | 0 | -1.19792 | 0.614 | 0.865 | 0 T cells | CYBA     |
| 13365 CAPG.6     | 0 | -1.21498 | 0.058 | 0.387 | 0 T cells | CAPG     |
| 13366 IFI30.5    | 0 | -1.2184  | 0.003 | 0.261 | 0 T cells | IFI30    |
| 13367 SYNGR2.5   | 0 | -1.21946 | 0.359 | 0.692 | 0 T cells | SYNGR2   |
| 13368 SYK.4      | 0 | -1.2217  | 0.003 | 0.383 | 0 T cells | SYK      |
| 13369 CLIC1.6    | 0 | -1.22973 | 0.54  | 0.878 | 0 T cells | CLIC1    |
| 13370 HCK.5      | 0 | -1.23191 | 0.003 | 0.285 | 0 T cells | HCK      |
| 13371 GSTP1.7    | 0 | -1.23226 | 0.422 | 0.653 | 0 T cells | GSTP1    |
| 13372 RETN.1     | 0 | -1.23362 | 0.007 | 0.128 | 0 T cells | RETN     |
| 13373 CD40.7     | 0 | -1.24612 | 0.004 | 0.326 | 0 T cells | CD40     |
| 13374 IGLL5.2    | 0 | -1.26475 | 0.002 | 0.188 | 0 T cells | IGLL5    |
| 13375 CD68.7     | 0 | -1.26828 | 0.008 | 0.211 | 0 T cells | CD68     |
| 13376 ALOX5.6    | 0 | -1.26851 | 0.007 | 0.371 | 0 T cells | ALOX5    |
| 13377 TMEM176B   | 0 | -1.27252 | 0.003 | 0.176 | 0 T cells | TMEM176B |
| 13378 IGHD.5     | 0 | -1.2873  | 0.004 | 0.272 | 0 T cells | IGHD     |
| 13379 ANXA2.7    | 0 | -1.31452 | 0.159 | 0.47  | 0 T cells | ANXA2    |
| 13380 IRF8.5     | 0 | -1.31979 | 0.011 | 0.349 | 0 T cells | IRF8     |
| 13381 PDLIM1.7   | 0 | -1.33058 | 0.014 | 0.377 | 0 T cells | PDLIM1   |
| 13382 CFD.3      | 0 | -1.33671 | 0.019 | 0.182 | 0 T cells | CFD      |
| 13383 NAPSA.7    | 0 | -1.34224 | 0.004 | 0.357 | 0 T cells | NAPSA    |
| 13384 CYBB.7     | 0 | -1.36877 | 0.005 | 0.356 | 0 T cells | CYBB     |
| 13385 HLA-DMB.1  | 0 | -1.42869 | 0.016 | 0.407 | 0 T cells | HLA-DMB  |
| 13386 PSAP.4     | 0 | -1.4351  | 0.31  | 0.523 | 0 T cells | PSAP     |
| 13387 MZB1.5     | 0 | -1.43775 | 0.009 | 0.246 | 0 T cells | MZB1     |
| 13388 CALHM6.7   | 0 | -1.4397  | 0.038 | 0.437 | 0 T cells | CALHM6   |
| 13389 SNX2.4     | 0 | -1.44171 | 0.234 | 0.638 | 0 T cells | SNX2     |
| 13390 CD72.7     | 0 | -1.46139 | 0.01  | 0.324 | 0 T cells | CD72     |
| 13391 FGR.6      | 0 | -1.46731 | 0.047 | 0.43  | 0 T cells | FGR      |
| 13392 LAT2.6     | 0 | -1.48523 | 0.007 | 0.455 | 0 T cells | LAT2     |
| 13393 PLPP5.6    | 0 | -1.49423 | 0.056 | 0.391 | 0 T cells | PLPP5    |
| 13394 SPI1.5     | 0 | -1.53344 | 0.005 | 0.36  | 0 T cells | SPI1     |

|       |           |   |          |       |       |           |           |
|-------|-----------|---|----------|-------|-------|-----------|-----------|
| 13395 | RALGPS2.6 | 0 | -1.54143 | 0.042 | 0.405 | 0 T cells | RALGPS2   |
| 13396 | FTH1.6    | 0 | -1.54603 | 0.977 | 0.987 | 0 T cells | FTH1      |
| 13397 | CD14.2    | 0 | -1.56034 | 0.005 | 0.165 | 0 T cells | CD14      |
| 13398 | GRN.5     | 0 | -1.57535 | 0.077 | 0.413 | 0 T cells | GRN       |
| 13399 | VCAN.1    | 0 | -1.5768  | 0.006 | 0.152 | 0 T cells | VCAN      |
| 13400 | LYN.5     | 0 | -1.58184 | 0.011 | 0.494 | 0 T cells | LYN       |
| 13401 | MNDA.7    | 0 | -1.5921  | 0.013 | 0.229 | 0 T cells | MNDA      |
| 13402 | FCGR3A.8  | 0 | -1.60346 | 0.046 | 0.208 | 0 T cells | FCGR3A    |
| 13403 | FAM129C.  | 0 | -1.6227  | 0.003 | 0.372 | 0 T cells | FAM129C   |
| 13404 | FCRLA.7   | 0 | -1.6375  | 0.001 | 0.376 | 0 T cells | FCRLA     |
| 13405 | DUSP1.4   | 0 | -1.64132 | 0.11  | 0.371 | 0 T cells | DUSP1     |
| 13406 | FTL.5     | 0 | -1.6754  | 0.99  | 0.997 | 0 T cells | FTL       |
| 13407 | IGLC3.4   | 0 | -1.67763 | 0.004 | 0.202 | 0 T cells | IGLC3     |
| 13408 | MEF2C.6   | 0 | -1.6809  | 0.004 | 0.451 | 0 T cells | MEF2C     |
| 13409 | STXBP2.6  | 0 | -1.70765 | 0.092 | 0.294 | 0 T cells | STXBP2    |
| 13410 | FCER2.7   | 0 | -1.73166 | 0.002 | 0.353 | 0 T cells | FCER2     |
| 13411 | CD19.7    | 0 | -1.73869 | 0.002 | 0.418 | 0 T cells | CD19      |
| 13412 | TYMP.6    | 0 | -1.75689 | 0.078 | 0.366 | 0 T cells | TYMP      |
| 13413 | LINC00926 | 0 | -1.80233 | 0.003 | 0.408 | 0 T cells | LINC00926 |
| 13414 | HVCN1.7   | 0 | -1.83894 | 0.078 | 0.52  | 0 T cells | HVCN1     |
| 13415 | CTSS.5    | 0 | -1.86921 | 0.17  | 0.577 | 0 T cells | CTSS      |
| 13416 | IGHA1.2   | 0 | -1.89311 | 0.014 | 0.119 | 0 T cells | IGHA1     |
| 13417 | IGLC2.4   | 0 | -1.90158 | 0.009 | 0.209 | 0 T cells | IGLC2     |
| 13418 | BANK1.5   | 0 | -1.91696 | 0.003 | 0.445 | 0 T cells | BANK1     |
| 13419 | CD37.6    | 0 | -1.94003 | 0.851 | 0.938 | 0 T cells | CD37      |
| 13420 | VPREB3.7  | 0 | -1.98719 | 0.002 | 0.402 | 0 T cells | VPREB3    |
| 13421 | SAT1.5    | 0 | -1.99927 | 0.323 | 0.568 | 0 T cells | SAT1      |
| 13422 | FOS.6     | 0 | -2.15801 | 0.03  | 0.202 | 0 T cells | FOS       |
| 13423 | LST1.8    | 0 | -2.20164 | 0.066 | 0.288 | 0 T cells | LST1      |
| 13424 | NCF1.6    | 0 | -2.20859 | 0.255 | 0.748 | 0 T cells | NCF1      |
| 13425 | FCN1.8    | 0 | -2.23257 | 0.007 | 0.219 | 0 T cells | FCN1      |
| 13426 | LGALS1.6  | 0 | -2.303   | 0.099 | 0.381 | 0 T cells | LGALS1    |
| 13427 | CD79B.7   | 0 | -2.31618 | 0.066 | 0.588 | 0 T cells | CD79B     |
| 13428 | HLA-DMA.  | 0 | -2.33279 | 0.067 | 0.664 | 0 T cells | HLA-DMA   |
| 13429 | SERPINA1. | 0 | -2.36144 | 0.01  | 0.231 | 0 T cells | SERPINA1  |
| 13430 | JCHAIN.5  | 0 | -2.46603 | 0.017 | 0.219 | 0 T cells | JCHAIN    |
| 13431 | HLA-DQA1  | 0 | -2.56939 | 0.01  | 0.585 | 0 T cells | HLA-DQA1  |
| 13432 | HLA-DQA2  | 0 | -2.63349 | 0.012 | 0.446 | 0 T cells | HLA-DQA2  |
| 13433 | HLA-DQB1  | 0 | -2.66782 | 0.018 | 0.621 | 0 T cells | HLA-DQB1  |
| 13434 | IGHM.5    | 0 | -2.75965 | 0.03  | 0.522 | 0 T cells | IGHM      |
| 13435 | FCER1G.5  | 0 | -2.8247  | 0.083 | 0.381 | 0 T cells | FCER1G    |
| 13436 | IGKC.4    | 0 | -2.90406 | 0.026 | 0.315 | 0 T cells | IGKC      |
| 13437 | TCL1A.7   | 0 | -3.03719 | 0.006 | 0.434 | 0 T cells | TCL1A     |
| 13438 | CST3.6    | 0 | -3.20473 | 0.033 | 0.27  | 0 T cells | CST3      |
| 13439 | HLA-DPB1. | 0 | -3.23988 | 0.162 | 0.789 | 0 T cells | HLA-DPB1  |
| 13440 | CD79A.6   | 0 | -3.24059 | 0.051 | 0.602 | 0 T cells | CD79A     |
| 13441 | LYZ.7     | 0 | -3.25529 | 0.036 | 0.243 | 0 T cells | LYZ       |

|       |           |           |          |       |       |           |         |            |
|-------|-----------|-----------|----------|-------|-------|-----------|---------|------------|
| 13442 | TYROBP.6  | 0         | -3.45251 | 0.038 | 0.392 | 0         | T cells | TYROBP     |
| 13443 | MS4A1.7   | 0         | -3.54171 | 0.01  | 0.572 | 0         | T cells | MS4A1      |
| 13444 | S100A12.6 | 0         | -3.69519 | 0.044 | 0.19  | 0         | T cells | S100A12    |
| 13445 | HLA-DPA1. | 0         | -3.72425 | 0.145 | 0.823 | 0         | T cells | HLA-DPA1   |
| 13446 | HLA-DRB5. | 0         | -3.80067 | 0.066 | 0.767 | 0         | T cells | HLA-DRB5   |
| 13447 | HLA-DRB1. | 0         | -3.92317 | 0.082 | 0.834 | 0         | T cells | HLA-DRB1   |
| 13448 | CD74.7    | 0         | -4.92431 | 0.684 | 0.956 | 0         | T cells | CD74       |
| 13449 | HLA-DRA.7 | 0         | -4.99854 | 0.049 | 0.809 | 0         | T cells | HLA-DRA    |
| 13450 | S100A9.5  | 0         | -5.23097 | 0.142 | 0.317 | 0         | T cells | S100A9     |
| 13451 | S100A8.6  | 0         | -5.83624 | 0.168 | 0.321 | 0         | T cells | S100A8     |
| 13452 | NAMPT.5   | 4.99E-308 | -0.88047 | 0.08  | 0.199 | 9.37E-304 | T cells | NAMPT      |
| 13453 | KIAA0040. | 4.00E-306 | -0.4492  | 0.108 | 0.237 | 7.51E-302 | T cells | KIAA0040   |
| 13454 | RPL17.5   | 1.90E-304 | 0.38885  | 0.769 | 0.648 | 3.56E-300 | T cells | RPL17      |
| 13455 | SAMD3.6   | 6.44E-304 | 0.360649 | 0.232 | 0.097 | 1.21E-299 | T cells | SAMD3      |
| 13456 | TACC3.5   | 1.52E-303 | 0.439277 | 0.258 | 0.126 | 2.85E-299 | T cells | TACC3      |
| 13457 | MT-ND1.6  | 4.79E-303 | -0.43715 | 0.84  | 0.884 | 8.99E-299 | T cells | MT-ND1     |
| 13458 | TRIM38.2  | 1.21E-302 | -0.37091 | 0.079 | 0.199 | 2.26E-298 | T cells | TRIM38     |
| 13459 | IRF1.6    | 3.76E-302 | -0.52427 | 0.328 | 0.489 | 7.07E-298 | T cells | IRF1       |
| 13460 | SFXN1.3   | 7.79E-302 | 0.427711 | 0.222 | 0.098 | 1.46E-297 | T cells | SFXN1      |
| 13461 | GDI2.3    | 1.19E-300 | -0.46213 | 0.506 | 0.627 | 2.24E-296 | T cells | GDI2       |
| 13462 | ORAI3.2   | 1.26E-300 | -0.27823 | 0.026 | 0.115 | 2.36E-296 | T cells | ORAI3      |
| 13463 | CYB5R4.2  | 8.02E-300 | -0.33762 | 0.082 | 0.204 | 1.51E-295 | T cells | CYB5R4     |
| 13464 | DNAJC10.1 | 2.43E-298 | -0.36865 | 0.076 | 0.193 | 4.56E-294 | T cells | DNAJC10    |
| 13465 | ARAP1.2   | 2.58E-298 | -0.35248 | 0.063 | 0.175 | 4.85E-294 | T cells | ARAP1      |
| 13466 | ATM.5     | 3.21E-298 | 0.448098 | 0.422 | 0.265 | 6.03E-294 | T cells | ATM        |
| 13467 | IFITM3.7  | 5.45E-298 | -1.75117 | 0.519 | 0.586 | 1.02E-293 | T cells | IFITM3     |
| 13468 | SERF2.6   | 7.61E-298 | -0.32128 | 0.988 | 0.985 | 1.43E-293 | T cells | SERF2      |
| 13469 | BACH1.1   | 1.80E-295 | -0.31812 | 0.046 | 0.148 | 3.39E-291 | T cells | BACH1      |
| 13470 | SFT2D1.3  | 3.16E-295 | -0.3876  | 0.173 | 0.324 | 5.94E-291 | T cells | SFT2D1     |
| 13471 | DBNL.5    | 4.79E-295 | -0.44837 | 0.309 | 0.465 | 8.99E-291 | T cells | DBNL       |
| 13472 | CCDC32.5  | 1.20E-293 | -0.41644 | 0.102 | 0.226 | 2.26E-289 | T cells | CCDC32     |
| 13473 | TPP1.4    | 2.13E-293 | -0.37848 | 0.112 | 0.244 | 4.00E-289 | T cells | TPP1       |
| 13474 | PRDX5.5   | 1.40E-292 | -0.44551 | 0.478 | 0.606 | 2.62E-288 | T cells | PRDX5      |
| 13475 | LRMP.1    | 5.61E-292 | -0.37146 | 0.074 | 0.189 | 1.05E-287 | T cells | LRMP       |
| 13476 | MCM5.4    | 6.44E-292 | -0.3801  | 0.088 | 0.209 | 1.21E-287 | T cells | MCM5       |
| 13477 | PTPN18.3  | 1.63E-291 | -0.344   | 0.067 | 0.18  | 3.06E-287 | T cells | PTPN18     |
| 13478 | PPP1R9B.1 | 3.07E-291 | -0.26906 | 0.028 | 0.115 | 5.78E-287 | T cells | PPP1R9B    |
| 13479 | AC243960. | 7.84E-291 | 0.420121 | 0.443 | 0.276 | 1.47E-286 | T cells | AC243960.1 |
| 13480 | PLEKHO1.3 | 1.16E-290 | -0.3263  | 0.054 | 0.159 | 2.19E-286 | T cells | PLEKHO1    |
| 13481 | AKTIP.3   | 3.59E-290 | 0.371541 | 0.163 | 0.056 | 6.74E-286 | T cells | AKTIP      |
| 13482 | PHF21A.2  | 5.66E-290 | -0.32866 | 0.038 | 0.131 | 1.06E-285 | T cells | PHF21A     |
| 13483 | RPL7.5    | 2.35E-289 | 0.307949 | 0.9   | 0.83  | 4.41E-285 | T cells | RPL7       |
| 13484 | SNRPN.4   | 2.37E-289 | 0.417597 | 0.419 | 0.261 | 4.45E-285 | T cells | SNRPN      |
| 13485 | ARPC2.7   | 4.90E-289 | -0.37435 | 0.852 | 0.868 | 9.21E-285 | T cells | ARPC2      |
| 13486 | SMARCB1.  | 4.95E-288 | -0.46367 | 0.249 | 0.398 | 9.29E-284 | T cells | SMARCB1    |
| 13487 | SPTLC2.3  | 8.39E-287 | -0.33482 | 0.069 | 0.181 | 1.58E-282 | T cells | SPTLC2     |
| 13488 | BRI3.5    | 2.10E-286 | -0.43144 | 0.072 | 0.184 | 3.95E-282 | T cells | BRI3       |



|       |           |           |          |       |       |           |         |          |
|-------|-----------|-----------|----------|-------|-------|-----------|---------|----------|
| 13489 | GYG1.6    | 4.91E-286 | -0.3911  | 0.106 | 0.235 | 9.22E-282 | T cells | GYG1     |
| 13490 | LINS1.3   | 4.64E-285 | 0.389635 | 0.186 | 0.073 | 8.72E-281 | T cells | LINS1    |
| 13491 | RAB30.1   | 1.94E-284 | -0.34662 | 0.036 | 0.128 | 3.65E-280 | T cells | RAB30    |
| 13492 | PPP1CA.5  | 1.96E-284 | -0.38206 | 0.61  | 0.719 | 3.68E-280 | T cells | PPP1CA   |
| 13493 | WASF2.2   | 1.27E-283 | -0.44055 | 0.331 | 0.482 | 2.38E-279 | T cells | WASF2    |
| 13494 | ZNF106.3  | 1.99E-283 | -0.37862 | 0.113 | 0.242 | 3.74E-279 | T cells | ZNF106   |
| 13495 | SELENOW.  | 2.31E-283 | 0.380429 | 0.565 | 0.409 | 4.34E-279 | T cells | SELENOW  |
| 13496 | DOPEY2.1  | 1.49E-280 | -0.31487 | 0.033 | 0.122 | 2.80E-276 | T cells | DOPEY2   |
| 13497 | DUSP22.2  | 6.67E-280 | -0.31821 | 0.063 | 0.171 | 1.25E-275 | T cells | DUSP22   |
| 13498 | ALKBH7.5  | 3.35E-279 | 0.444418 | 0.524 | 0.387 | 6.30E-275 | T cells | ALKBH7   |
| 13499 | NEAT1.5   | 2.92E-278 | -1.12877 | 0.264 | 0.395 | 5.49E-274 | T cells | NEAT1    |
| 13500 | RSL1D1.5  | 8.34E-278 | 0.408783 | 0.617 | 0.483 | 1.57E-273 | T cells | RSL1D1   |
| 13501 | ADAM8.5   | 1.94E-277 | -0.4035  | 0.082 | 0.198 | 3.65E-273 | T cells | ADAM8    |
| 13502 | PPP3CA.1  | 5.95E-277 | -0.30253 | 0.042 | 0.137 | 1.12E-272 | T cells | PPP3CA   |
| 13503 | CD9.2     | 6.82E-276 | -0.4738  | 0.035 | 0.123 | 1.28E-271 | T cells | CD9      |
| 13504 | PARP14.2  | 6.32E-274 | -0.35597 | 0.062 | 0.167 | 1.19E-269 | T cells | PARP14   |
| 13505 | BLVRA.4   | 3.74E-272 | -0.33224 | 0.057 | 0.16  | 7.02E-268 | T cells | BLVRA    |
| 13506 | ADD1.4    | 3.75E-271 | -0.40207 | 0.124 | 0.25  | 7.04E-267 | T cells | ADD1     |
| 13507 | CPNE2     | 3.59E-270 | 0.331161 | 0.102 | 0.022 | 6.74E-266 | T cells | CPNE2    |
| 13508 | ACAP2.2   | 5.91E-270 | -0.43489 | 0.315 | 0.467 | 1.11E-265 | T cells | ACAP2    |
| 13509 | JAK2.1    | 7.56E-270 | -0.25924 | 0.026 | 0.108 | 1.42E-265 | T cells | JAK2     |
| 13510 | C7orf50.2 | 1.12E-269 | -0.42862 | 0.153 | 0.288 | 2.11E-265 | T cells | C7orf50  |
| 13511 | RPL22L1.5 | 3.07E-269 | -0.4819  | 0.4   | 0.537 | 5.76E-265 | T cells | RPL22L1  |
| 13512 | AP1B1.1   | 3.07E-269 | -0.29822 | 0.05  | 0.147 | 5.77E-265 | T cells | AP1B1    |
| 13513 | IQSEC1.1  | 7.38E-269 | -0.30678 | 0.053 | 0.152 | 1.39E-264 | T cells | IQSEC1   |
| 13514 | CYSLTR1.1 | 1.01E-267 | -0.30265 | 0.05  | 0.148 | 1.89E-263 | T cells | CYSLTR1  |
| 13515 | NUMB.1    | 1.36E-266 | -0.34204 | 0.084 | 0.198 | 2.56E-262 | T cells | NUMB     |
| 13516 | NSA2.4    | 1.63E-266 | 0.408941 | 0.588 | 0.449 | 3.05E-262 | T cells | NSA2     |
| 13517 | DDX5.5    | 2.12E-266 | 0.301598 | 0.882 | 0.807 | 3.98E-262 | T cells | DDX5     |
| 13518 | UBE2R2.1  | 1.00E-265 | -0.27075 | 0.044 | 0.137 | 1.89E-261 | T cells | UBE2R2   |
| 13519 | TMEM205   | 2.78E-264 | -0.32672 | 0.105 | 0.228 | 5.23E-260 | T cells | TMEM205  |
| 13520 | ARHGEF1.6 | 2.72E-263 | 0.404535 | 0.616 | 0.486 | 5.10E-259 | T cells | ARHGEF1  |
| 13521 | MIEN1.5   | 1.48E-262 | -0.40596 | 0.29  | 0.443 | 2.79E-258 | T cells | MIEN1    |
| 13522 | CSK.7     | 1.61E-261 | -0.43729 | 0.438 | 0.574 | 3.03E-257 | T cells | CSK      |
| 13523 | IFI27L2.5 | 3.38E-261 | -0.35461 | 0.154 | 0.293 | 6.34E-257 | T cells | IFI27L2  |
| 13524 | RPS10.5   | 8.42E-261 | 0.432588 | 0.719 | 0.611 | 1.58E-256 | T cells | RPS10    |
| 13525 | MXD1.1    | 1.14E-260 | -0.31821 | 0.025 | 0.103 | 2.14E-256 | T cells | MXD1     |
| 13526 | PBXIP1.4  | 7.45E-259 | 0.428598 | 0.263 | 0.138 | 1.40E-254 | T cells | PBXIP1   |
| 13527 | S100A11.5 | 5.93E-258 | -1.91456 | 0.432 | 0.51  | 1.11E-253 | T cells | S100A11  |
| 13528 | APOBEC3G  | 1.78E-257 | -0.41064 | 0.157 | 0.292 | 3.34E-253 | T cells | APOBEC3G |
| 13529 | SNHG8.3   | 2.77E-257 | 0.422622 | 0.512 | 0.369 | 5.20E-253 | T cells | SNHG8    |
| 13530 | CUX1.2    | 6.68E-256 | -0.43215 | 0.088 | 0.199 | 1.25E-251 | T cells | CUX1     |
| 13531 | ARL4C.8   | 1.42E-254 | 0.352605 | 0.333 | 0.191 | 2.66E-250 | T cells | ARL4C    |
| 13532 | HINT1.5   | 6.34E-253 | 0.253502 | 0.943 | 0.882 | 1.19E-248 | T cells | HINT1    |
| 13533 | GNS.1     | 1.34E-252 | -0.26832 | 0.037 | 0.123 | 2.51E-248 | T cells | GNS      |
| 13534 | ATOX1.6   | 1.42E-252 | -0.39819 | 0.173 | 0.31  | 2.66E-248 | T cells | ATOX1    |
| 13535 | CASP1.4   | 1.73E-252 | -0.49592 | 0.179 | 0.306 | 3.26E-248 | T cells | CASP1    |

|       |             |           |          |       |       |           |         |            |
|-------|-------------|-----------|----------|-------|-------|-----------|---------|------------|
| 13536 | BEX2.3      | 4.73E-252 | 0.333801 | 0.164 | 0.062 | 8.89E-248 | T cells | BEX2       |
| 13537 | EPB41.5     | 1.15E-251 | 0.421386 | 0.354 | 0.216 | 2.16E-247 | T cells | EPB41      |
| 13538 | ATP5MG.5    | 2.01E-251 | 0.252267 | 0.95  | 0.885 | 3.78E-247 | T cells | ATP5MG     |
| 13539 | SEMA4D.3    | 4.55E-251 | 0.406907 | 0.234 | 0.117 | 8.55E-247 | T cells | SEMA4D     |
| 13540 | MFSD1.4     | 2.16E-250 | -0.35473 | 0.131 | 0.257 | 4.06E-246 | T cells | MFSD1      |
| 13541 | OSTF1.5     | 2.97E-250 | -0.41863 | 0.393 | 0.533 | 5.58E-246 | T cells | OSTF1      |
| 13542 | NOP53.5     | 4.63E-249 | 0.334799 | 0.705 | 0.578 | 8.69E-245 | T cells | NOP53      |
| 13543 | BIN1.5      | 3.01E-247 | 0.334761 | 0.551 | 0.38  | 5.66E-243 | T cells | BIN1       |
| 13544 | PARP15.3    | 5.88E-247 | -0.37657 | 0.066 | 0.165 | 1.11E-242 | T cells | PARP15     |
| 13545 | PLSCR3.2    | 9.14E-246 | 0.397535 | 0.222 | 0.109 | 1.72E-241 | T cells | PLSCR3     |
| 13546 | MYO1G.6     | 4.15E-245 | -0.3909  | 0.204 | 0.344 | 7.80E-241 | T cells | MYO1G      |
| 13547 | CD4.5       | 4.94E-245 | 0.421356 | 0.203 | 0.096 | 9.29E-241 | T cells | CD4        |
| 13548 | SHKBP1.3    | 6.63E-245 | -0.38292 | 0.284 | 0.431 | 1.25E-240 | T cells | SHKBP1     |
| 13549 | AC008555.5  | 8.09E-242 | 0.321948 | 0.175 | 0.071 | 1.52E-237 | T cells | AC008555.5 |
| 13550 | UBE2A.2     | 9.42E-240 | -0.31805 | 0.16  | 0.293 | 1.77E-235 | T cells | UBE2A      |
| 13551 | DYNLL1.5    | 1.79E-239 | -0.42689 | 0.352 | 0.492 | 3.37E-235 | T cells | DYNLL1     |
| 13552 | SNX5.2      | 1.89E-239 | -0.34576 | 0.153 | 0.282 | 3.55E-235 | T cells | SNX5       |
| 13553 | FAM107B.4   | 4.42E-239 | 0.369609 | 0.337 | 0.203 | 8.31E-235 | T cells | FAM107B    |
| 13554 | HIST1H2BK.4 | 4.48E-239 | -0.31932 | 0.061 | 0.157 | 8.42E-235 | T cells | HIST1H2BK  |
| 13555 | CTSB.5      | 1.31E-238 | -0.5685  | 0.175 | 0.295 | 2.47E-234 | T cells | CTSB       |
| 13556 | LAPTM4A.1   | 2.37E-238 | -0.37814 | 0.309 | 0.452 | 4.46E-234 | T cells | LAPTM4A    |
| 13557 | PARP1.5     | 1.60E-236 | -0.4526  | 0.285 | 0.415 | 3.00E-232 | T cells | PARP1      |
| 13558 | TBC1D22A.4  | 4.08E-236 | -0.31904 | 0.084 | 0.189 | 7.66E-232 | T cells | TBC1D22A   |
| 13559 | MIF.5       | 2.25E-235 | 0.278446 | 0.88  | 0.78  | 4.23E-231 | T cells | MIF        |
| 13560 | AKIRIN2.4   | 2.50E-234 | -0.34268 | 0.148 | 0.275 | 4.69E-230 | T cells | AKIRIN2    |
| 13561 | RHOH.6      | 5.39E-234 | 0.319055 | 0.538 | 0.369 | 1.01E-229 | T cells | RHOH       |
| 13562 | USP28.2     | 1.23E-233 | -0.25974 | 0.032 | 0.11  | 2.32E-229 | T cells | USP28      |
| 13563 | DMXL1.1     | 1.71E-233 | -0.3203  | 0.064 | 0.16  | 3.20E-229 | T cells | DMXL1      |
| 13564 | STARD3NL.7  | 7.50E-233 | -0.36491 | 0.1   | 0.212 | 1.41E-228 | T cells | STARD3NL   |
| 13565 | GRK2.4      | 1.77E-232 | -0.36653 | 0.127 | 0.246 | 3.33E-228 | T cells | GRK2       |
| 13566 | UXT.4       | 1.91E-232 | 0.345342 | 0.707 | 0.6   | 3.58E-228 | T cells | UXT        |
| 13567 | RIOK3.3     | 1.72E-231 | -0.36285 | 0.13  | 0.25  | 3.22E-227 | T cells | RIOK3      |
| 13568 | HOTAIRM1.9  | 1.10E-231 | -0.25194 | 0.04  | 0.123 | 1.71E-226 | T cells | HOTAIRM1   |
| 13569 | CAT.3       | 9.71E-231 | -0.37867 | 0.202 | 0.333 | 1.82E-226 | T cells | CAT        |
| 13570 | SEPT6.4     | 2.34E-230 | 0.360205 | 0.615 | 0.476 | 4.39E-226 | T cells | Sep-06     |
| 13571 | UNC119.3    | 1.06E-229 | -0.36545 | 0.149 | 0.272 | 2.00E-225 | T cells | UNC119     |
| 13572 | RABEP2.1    | 2.20E-229 | -0.27542 | 0.04  | 0.123 | 4.13E-225 | T cells | RABEP2     |
| 13573 | EIF3L.5     | 3.08E-229 | 0.322855 | 0.742 | 0.636 | 5.78E-225 | T cells | EIF3L      |
| 13574 | KIF2A.5     | 1.67E-228 | 0.349892 | 0.372 | 0.239 | 3.14E-224 | T cells | KIF2A      |
| 13575 | PFKL.3      | 3.47E-228 | -0.3766  | 0.214 | 0.348 | 6.52E-224 | T cells | PFKL       |
| 13576 | RAB8A.4     | 3.68E-228 | -0.36356 | 0.205 | 0.338 | 6.92E-224 | T cells | RAB8A      |
| 13577 | CARS2.1     | 1.63E-227 | -0.25826 | 0.042 | 0.125 | 3.06E-223 | T cells | CARS2      |
| 13578 | UBE2D1.3    | 1.64E-227 | -0.35689 | 0.138 | 0.257 | 3.08E-223 | T cells | UBE2D1     |
| 13579 | LAMTOR2.2   | 2.38E-227 | -0.37582 | 0.236 | 0.372 | 4.47E-223 | T cells | LAMTOR2    |
| 13580 | RFX5.1      | 2.53E-227 | -0.32188 | 0.067 | 0.162 | 4.75E-223 | T cells | RFX5       |
| 13581 | MFNG.4      | 7.30E-226 | 0.4068   | 0.389 | 0.263 | 1.37E-221 | T cells | MFNG       |
| 13582 | TXNDC17.4   | 4.53E-225 | -0.33571 | 0.174 | 0.303 | 8.52E-221 | T cells | TXNDC17    |

|       |           |           |          |       |       |           |         |              |
|-------|-----------|-----------|----------|-------|-------|-----------|---------|--------------|
| 13583 | MAPKAPK5  | 3.77E-224 | 0.398916 | 0.295 | 0.174 | 7.07E-220 | T cells | MAPKAPK5-AS1 |
| 13584 | MANBA     | 5.61E-224 | -0.29889 | 0.077 | 0.177 | 1.05E-219 | T cells | MANBA        |
| 13585 | PPP1R2    | 3.14E-223 | 0.39641  | 0.48  | 0.353 | 5.90E-219 | T cells | PPP1R2       |
| 13586 | CYLD      | 4.10E-223 | 0.425788 | 0.306 | 0.187 | 7.70E-219 | T cells | CYLD         |
| 13587 | LINC00623 | 5.20E-223 | 0.344131 | 0.207 | 0.099 | 9.77E-219 | T cells | LINC00623    |
| 13588 | SUPT3H    | 1.05E-222 | 0.323208 | 0.146 | 0.056 | 1.97E-218 | T cells | SUPT3H       |
| 13589 | RNF13     | 2.25E-222 | -0.33893 | 0.16  | 0.284 | 4.23E-218 | T cells | RNF13        |
| 13590 | NCOA3     | 5.23E-222 | -0.328   | 0.108 | 0.219 | 9.82E-218 | T cells | NCOA3        |
| 13591 | CALM3     | 8.17E-222 | 0.328553 | 0.574 | 0.436 | 1.53E-217 | T cells | CALM3        |
| 13592 | VPS37B    | 1.48E-221 | -0.32264 | 0.093 | 0.197 | 2.78E-217 | T cells | VPS37B       |
| 13593 | PSIP1     | 1.89E-221 | 0.370824 | 0.433 | 0.296 | 3.55E-217 | T cells | PSIP1        |
| 13594 | CCPG1     | 2.33E-221 | -0.31172 | 0.08  | 0.181 | 4.37E-217 | T cells | CCPG1        |
| 13595 | CAMK2D    | 1.77E-220 | -0.37589 | 0.071 | 0.163 | 3.32E-216 | T cells | CAMK2D       |
| 13596 | TMEM167A  | 5.36E-219 | -0.33589 | 0.142 | 0.262 | 1.01E-214 | T cells | TMEM167A     |
| 13597 | INPP5D    | 1.60E-218 | -0.32443 | 0.095 | 0.2   | 3.01E-214 | T cells | INPP5D       |
| 13598 | ACTR2     | 1.68E-217 | -0.38842 | 0.303 | 0.439 | 3.15E-213 | T cells | ACTR2        |
| 13599 | CLUAP1    | 1.35E-216 | 0.263389 | 0.104 | 0.03  | 2.53E-212 | T cells | CLUAP1       |
| 13600 | ARPC1B    | 1.63E-216 | -0.42623 | 0.424 | 0.537 | 3.06E-212 | T cells | ARPC1B       |
| 13601 | CALM2     | 3.69E-216 | -0.3417  | 0.798 | 0.82  | 6.92E-212 | T cells | CALM2        |
| 13602 | FLNA      | 2.25E-215 | -0.43046 | 0.289 | 0.424 | 4.23E-211 | T cells | FLNA         |
| 13603 | LY9       | 3.24E-215 | 0.317944 | 0.25  | 0.131 | 6.10E-211 | T cells | LY9          |
| 13604 | LCP1      | 4.76E-215 | -0.49837 | 0.545 | 0.628 | 8.94E-211 | T cells | LCP1         |
| 13605 | LMBRD1    | 6.26E-215 | -0.39149 | 0.229 | 0.358 | 1.18E-210 | T cells | LMBRD1       |
| 13606 | SRSF5     | 7.96E-215 | 0.29984  | 0.796 | 0.709 | 1.50E-210 | T cells | SRSF5        |
| 13607 | EIF3G     | 2.43E-214 | 0.260296 | 0.809 | 0.714 | 4.57E-210 | T cells | EIF3G        |
| 13608 | REXO2     | 2.69E-214 | 0.42038  | 0.292 | 0.178 | 5.06E-210 | T cells | REXO2        |
| 13609 | RILPL2    | 4.67E-213 | -0.32967 | 0.126 | 0.239 | 8.78E-209 | T cells | RILPL2       |
| 13610 | FCGRT     | 2.03E-212 | -0.55077 | 0.159 | 0.267 | 3.81E-208 | T cells | FCGRT        |
| 13611 | PRKAR1A   | 6.76E-212 | -0.37094 | 0.255 | 0.388 | 1.27E-207 | T cells | PRKAR1A      |
| 13612 | CAMK1D    | 2.89E-211 | -0.32811 | 0.088 | 0.187 | 5.43E-207 | T cells | CAMK1D       |
| 13613 | EPN1      | 4.39E-211 | -0.3039  | 0.149 | 0.27  | 8.25E-207 | T cells | EPN1         |
| 13614 | SHOC2     | 7.93E-211 | -0.31666 | 0.123 | 0.235 | 1.49E-206 | T cells | SHOC2        |
| 13615 | HOPX      | 5.21E-210 | -0.85498 | 0.07  | 0.158 | 9.78E-206 | T cells | HOPX         |
| 13616 | YWHAH     | 5.98E-210 | -0.30364 | 0.095 | 0.2   | 1.12E-205 | T cells | YWHAH        |
| 13617 | SOD2      | 7.33E-210 | -0.58774 | 0.141 | 0.252 | 1.38E-205 | T cells | SOD2         |
| 13618 | RORA      | 4.35E-209 | 0.295996 | 0.143 | 0.055 | 8.17E-205 | T cells | RORA         |
| 13619 | GPRIN3    | 7.20E-209 | 0.322244 | 0.136 | 0.053 | 1.35E-204 | T cells | GPRIN3       |
| 13620 | KLRG1     | 1.03E-208 | 0.468425 | 0.123 | 0.043 | 1.93E-204 | T cells | KLRG1        |
| 13621 | SNX29     | 4.02E-208 | -0.32795 | 0.075 | 0.168 | 7.56E-204 | T cells | SNX29        |
| 13622 | GMFG      | 4.28E-208 | 0.262516 | 0.819 | 0.704 | 8.04E-204 | T cells | GMFG         |
| 13623 | TOR3A     | 1.00E-207 | -0.2728  | 0.092 | 0.194 | 1.89E-203 | T cells | TOR3A        |
| 13624 | SH3GLB1   | 3.21E-207 | -0.33477 | 0.179 | 0.305 | 6.04E-203 | T cells | SH3GLB1      |
| 13625 | CD38      | 6.10E-205 | -0.38923 | 0.068 | 0.155 | 1.15E-200 | T cells | CD38         |
| 13626 | CKLF      | 9.63E-205 | -0.43885 | 0.193 | 0.316 | 1.81E-200 | T cells | CKLF         |
| 13627 | ZCCHC7    | 1.20E-203 | -0.42229 | 0.168 | 0.278 | 2.25E-199 | T cells | ZCCHC7       |
| 13628 | SLC9A3R1  | 1.87E-203 | 0.28326  | 0.479 | 0.339 | 3.51E-199 | T cells | SLC9A3R1     |
| 13629 | LAIR1     | 2.33E-203 | -0.37565 | 0.159 | 0.274 | 4.38E-199 | T cells | LAIR1        |

|       |           |           |          |       |       |           |         |          |
|-------|-----------|-----------|----------|-------|-------|-----------|---------|----------|
| 13630 | ABI3.7    | 3.15E-203 | -0.45013 | 0.125 | 0.23  | 5.91E-199 | T cells | ABI3     |
| 13631 | FLOT2.2   | 4.17E-203 | -0.37319 | 0.252 | 0.38  | 7.83E-199 | T cells | FLOT2    |
| 13632 | MAML2.4   | 9.73E-203 | 0.33188  | 0.21  | 0.105 | 1.83E-198 | T cells | MAML2    |
| 13633 | SELENOM.  | 7.50E-202 | 0.319075 | 0.143 | 0.058 | 1.41E-197 | T cells | SELENOM  |
| 13634 | CXCR4.7   | 7.95E-202 | -0.69715 | 0.279 | 0.38  | 1.49E-197 | T cells | CXCR4    |
| 13635 | RARA.2    | 1.58E-201 | -0.26229 | 0.061 | 0.149 | 2.98E-197 | T cells | RARA     |
| 13636 | PEBP1.5   | 8.07E-201 | 0.297337 | 0.59  | 0.444 | 1.52E-196 | T cells | PEBP1    |
| 13637 | PDIA6.6   | 9.59E-201 | -0.44602 | 0.31  | 0.431 | 1.80E-196 | T cells | PDIA6    |
| 13638 | GZMB.7    | 4.16E-200 | -1.52231 | 0.068 | 0.152 | 7.81E-196 | T cells | GZMB     |
| 13639 | MSN.5     | 1.34E-199 | -0.40278 | 0.428 | 0.542 | 2.51E-195 | T cells | MSN      |
| 13640 | CHCHD10.  | 2.16E-199 | -0.42644 | 0.384 | 0.499 | 4.05E-195 | T cells | CHCHD10  |
| 13641 | IL16.4    | 5.68E-198 | 0.324525 | 0.593 | 0.462 | 1.07E-193 | T cells | IL16     |
| 13642 | DEF6.5    | 2.59E-197 | 0.356093 | 0.398 | 0.277 | 4.87E-193 | T cells | DEF6     |
| 13643 | SNAP23.4  | 3.25E-195 | -0.35905 | 0.215 | 0.336 | 6.11E-191 | T cells | SNAP23   |
| 13644 | CDC42EP3  | 9.01E-195 | -0.36463 | 0.129 | 0.238 | 1.69E-190 | T cells | CDC42EP3 |
| 13645 | SLC2A4RG  | 1.31E-194 | 0.274577 | 0.101 | 0.031 | 2.46E-190 | T cells | SLC2A4RG |
| 13646 | HRH2.2    | 2.77E-194 | -0.35099 | 0.054 | 0.134 | 5.21E-190 | T cells | HRH2     |
| 13647 | CLEC11A.2 | 3.74E-194 | 0.286586 | 0.122 | 0.044 | 7.03E-190 | T cells | CLEC11A  |
| 13648 | PDCD4.3   | 2.11E-193 | 0.356864 | 0.456 | 0.327 | 3.96E-189 | T cells | PDCD4    |
| 13649 | PNPLA8.2  | 4.46E-193 | -0.2908  | 0.096 | 0.194 | 8.37E-189 | T cells | PNPLA8   |
| 13650 | ATP6V1B2  | 6.28E-193 | -0.30926 | 0.114 | 0.218 | 1.18E-188 | T cells | ATP6V1B2 |
| 13651 | HELB      | 3.49E-192 | 0.270741 | 0.116 | 0.041 | 6.56E-188 | T cells | HELB     |
| 13652 | LY96.2    | 2.32E-191 | -0.27111 | 0.069 | 0.158 | 4.35E-187 | T cells | LY96     |
| 13653 | RASA3.7   | 6.09E-191 | 0.337415 | 0.253 | 0.145 | 1.14E-186 | T cells | RASA3    |
| 13654 | ELOVL1.4  | 8.01E-191 | -0.29105 | 0.141 | 0.253 | 1.50E-186 | T cells | ELOVL1   |
| 13655 | TIMP1.5   | 1.63E-190 | -1.09611 | 0.193 | 0.286 | 3.06E-186 | T cells | TIMP1    |
| 13656 | H3F3B.4   | 3.92E-189 | -0.30926 | 0.951 | 0.95  | 7.36E-185 | T cells | H3F3B    |
| 13657 | NDUFS5.5  | 6.99E-189 | 0.295926 | 0.613 | 0.477 | 1.31E-184 | T cells | NDUFS5   |
| 13658 | ARPC4.3   | 1.11E-188 | -0.28051 | 0.088 | 0.183 | 2.09E-184 | T cells | ARPC4    |
| 13659 | NCR3.5    | 1.44E-188 | -0.37288 | 0.077 | 0.165 | 2.70E-184 | T cells | NCR3     |
| 13660 | SPINT2.6  | 6.02E-188 | -0.37355 | 0.212 | 0.328 | 1.13E-183 | T cells | SPINT2   |
| 13661 | CLEC2D.5  | 7.12E-188 | 0.318866 | 0.383 | 0.25  | 1.34E-183 | T cells | CLEC2D   |
| 13662 | FCRL3.3   | 1.94E-187 | -0.31484 | 0.033 | 0.101 | 3.64E-183 | T cells | FCRL3    |
| 13663 | CRTAP.2   | 9.40E-187 | -0.30665 | 0.115 | 0.217 | 1.77E-182 | T cells | CRTAP    |
| 13664 | TMC8.2    | 1.40E-185 | 0.355479 | 0.333 | 0.216 | 2.62E-181 | T cells | TMC8     |
| 13665 | BUB3.3    | 3.48E-185 | 0.315411 | 0.505 | 0.38  | 6.53E-181 | T cells | BUB3     |
| 13666 | G6PD.4    | 5.54E-185 | -0.31595 | 0.144 | 0.252 | 1.04E-180 | T cells | G6PD     |
| 13667 | LHPP.5    | 8.82E-185 | -0.3958  | 0.114 | 0.211 | 1.66E-180 | T cells | LHPP     |
| 13668 | FBP1.1    | 1.13E-184 | -0.26515 | 0.035 | 0.103 | 2.13E-180 | T cells | FBP1     |
| 13669 | ODC1.4    | 2.53E-184 | -0.34971 | 0.117 | 0.216 | 4.75E-180 | T cells | ODC1     |
| 13670 | RAB10.4   | 7.49E-184 | -0.33771 | 0.182 | 0.297 | 1.41E-179 | T cells | RAB10    |
| 13671 | AP2S1.4   | 1.47E-183 | -0.45671 | 0.396 | 0.488 | 2.76E-179 | T cells | AP2S1    |
| 13672 | TPI1.6    | 4.24E-183 | -0.39646 | 0.593 | 0.652 | 7.97E-179 | T cells | TPI1     |
| 13673 | TBC1D10C  | 1.22E-182 | 0.265923 | 0.72  | 0.596 | 2.29E-178 | T cells | TBC1D10C |
| 13674 | B4GALT1.2 | 9.25E-182 | -0.293   | 0.077 | 0.164 | 1.74E-177 | T cells | B4GALT1  |
| 13675 | PPP2R5C.6 | 2.39E-180 | 0.426256 | 0.255 | 0.153 | 4.49E-176 | T cells | PPP2R5C  |
| 13676 | IFI35.3   | 3.44E-180 | -0.28675 | 0.157 | 0.27  | 6.47E-176 | T cells | IFI35    |

|       |           |           |          |       |       |                   |          |
|-------|-----------|-----------|----------|-------|-------|-------------------|----------|
| 13677 | JUND.1    | 4.13E-180 | -0.26082 | 0.055 | 0.133 | 7.77E-176 T cells | JUND     |
| 13678 | CHD3.2    | 3.11E-179 | 0.311189 | 0.192 | 0.098 | 5.85E-175 T cells | CHD3     |
| 13679 | MZT2A.2   | 3.91E-179 | 0.359795 | 0.33  | 0.218 | 7.35E-175 T cells | MZT2A    |
| 13680 | KLF6.7    | 9.99E-179 | -0.38989 | 0.262 | 0.385 | 1.88E-174 T cells | KLF6     |
| 13681 | CENPK.2   | 2.24E-178 | 0.296614 | 0.134 | 0.056 | 4.21E-174 T cells | CENPK    |
| 13682 | AFTPH.1   | 3.28E-178 | -0.25267 | 0.079 | 0.167 | 6.16E-174 T cells | AFTPH    |
| 13683 | C1QBP.3   | 3.73E-178 | 0.298058 | 0.618 | 0.501 | 7.01E-174 T cells | C1QBP    |
| 13684 | CLTC.2    | 4.15E-178 | -0.26093 | 0.106 | 0.206 | 7.80E-174 T cells | CLTC     |
| 13685 | VCL.3     | 5.70E-178 | -0.26541 | 0.041 | 0.112 | 1.07E-173 T cells | VCL      |
| 13686 | GPCPD1.2  | 8.58E-178 | -0.29632 | 0.108 | 0.206 | 1.61E-173 T cells | GPCPD1   |
| 13687 | CHMP7.4   | 1.81E-177 | 0.364438 | 0.29  | 0.181 | 3.40E-173 T cells | CHMP7    |
| 13688 | MYD88.3   | 2.07E-177 | -0.3201  | 0.145 | 0.249 | 3.88E-173 T cells | MYD88    |
| 13689 | ILK.6     | 2.44E-177 | -0.35218 | 0.204 | 0.322 | 4.59E-173 T cells | ILK      |
| 13690 | TTC38.3   | 4.33E-177 | -0.41247 | 0.045 | 0.116 | 8.14E-173 T cells | TTC38    |
| 13691 | RASAL3.6  | 2.53E-176 | 0.337543 | 0.313 | 0.201 | 4.75E-172 T cells | RASAL3   |
| 13692 | AGPAT5.2  | 3.80E-176 | -0.31088 | 0.059 | 0.136 | 7.14E-172 T cells | AGPAT5   |
| 13693 | CERS4.2   | 6.16E-176 | -0.2857  | 0.051 | 0.125 | 1.16E-171 T cells | CERS4    |
| 13694 | ARHGAP27  | 7.58E-176 | -0.25145 | 0.095 | 0.189 | 1.42E-171 T cells | ARHGAP27 |
| 13695 | CUTA.3    | 7.95E-176 | 0.303732 | 0.642 | 0.533 | 1.49E-171 T cells | CUTA     |
| 13696 | MIIP.3    | 1.60E-175 | -0.27333 | 0.13  | 0.234 | 3.00E-171 T cells | MIIP     |
| 13697 | NFKB2.1   | 1.74E-175 | -0.27619 | 0.063 | 0.142 | 3.28E-171 T cells | NFKB2    |
| 13698 | RNF181.3  | 3.24E-175 | -0.32472 | 0.295 | 0.42  | 6.09E-171 T cells | RNF181   |
| 13699 | ADSL.2    | 5.25E-175 | 0.369976 | 0.351 | 0.246 | 9.85E-171 T cells | ADSL     |
| 13700 | SEPT9.4   | 7.09E-175 | 0.313947 | 0.635 | 0.524 | 1.33E-170 T cells | Sep-09   |
| 13701 | ACP5.2    | 7.56E-175 | -0.3535  | 0.131 | 0.23  | 1.42E-170 T cells | ACP5     |
| 13702 | TUBA1A.4  | 9.99E-175 | -0.61258 | 0.378 | 0.469 | 1.88E-170 T cells | TUBA1A   |
| 13703 | BAX.4     | 1.92E-174 | -0.3409  | 0.325 | 0.448 | 3.61E-170 T cells | BAX      |
| 13704 | PSMB3.5   | 2.10E-174 | -0.34163 | 0.464 | 0.559 | 3.94E-170 T cells | PSMB3    |
| 13705 | EIF1B.5   | 3.83E-174 | -0.3336  | 0.314 | 0.439 | 7.20E-170 T cells | EIF1B    |
| 13706 | RAB5IF.4  | 8.84E-174 | -0.35278 | 0.237 | 0.353 | 1.66E-169 T cells | RAB5IF   |
| 13707 | IRF7.2    | 9.02E-174 | -0.43586 | 0.254 | 0.374 | 1.69E-169 T cells | IRF7     |
| 13708 | TSPO.6    | 1.99E-173 | -1.21852 | 0.459 | 0.501 | 3.73E-169 T cells | TSPO     |
| 13709 | NCKAP1L.3 | 7.87E-173 | -0.30076 | 0.187 | 0.301 | 1.48E-168 T cells | NCKAP1L  |
| 13710 | SMIM29.5  | 1.18E-172 | -0.29728 | 0.133 | 0.235 | 2.22E-168 T cells | SMIM29   |
| 13711 | VMP1.4    | 1.27E-172 | -0.33937 | 0.146 | 0.251 | 2.39E-168 T cells | VMP1     |
| 13712 | MAP3K1.3  | 1.08E-171 | -0.25182 | 0.073 | 0.157 | 2.03E-167 T cells | MAP3K1   |
| 13713 | RHOG.5    | 1.56E-171 | -0.4608  | 0.48  | 0.554 | 2.93E-167 T cells | RHOG     |
| 13714 | PRKAR1B.1 | 7.12E-171 | 0.266331 | 0.125 | 0.051 | 1.34E-166 T cells | PRKAR1B  |
| 13715 | CAPZA1.2  | 1.54E-170 | -0.30437 | 0.239 | 0.36  | 2.89E-166 T cells | CAPZA1   |
| 13716 | ITSN2.3   | 5.70E-170 | -0.31907 | 0.214 | 0.33  | 1.07E-165 T cells | ITSN2    |
| 13717 | IL4R.5    | 3.95E-168 | -0.57149 | 0.155 | 0.247 | 7.42E-164 T cells | IL4R     |
| 13718 | SOCS3.5   | 9.68E-168 | 0.385113 | 0.202 | 0.111 | 1.82E-163 T cells | SOCS3    |
| 13719 | GNLY.7    | 1.32E-167 | -2.17035 | 0.067 | 0.14  | 2.47E-163 T cells | GNLY     |
| 13720 | GCC2.3    | 2.45E-167 | 0.346884 | 0.339 | 0.228 | 4.61E-163 T cells | GCC2     |
| 13721 | ERP44.3   | 3.06E-167 | -0.29291 | 0.195 | 0.308 | 5.75E-163 T cells | ERP44    |
| 13722 | TIFA.1    | 5.35E-167 | -0.25373 | 0.052 | 0.125 | 1.01E-162 T cells | TIFA     |
| 13723 | PPM1K.3   | 5.45E-167 | -0.36025 | 0.15  | 0.248 | 1.02E-162 T cells | PPM1K    |

|       |            |           |          |       |       |           |         |          |
|-------|------------|-----------|----------|-------|-------|-----------|---------|----------|
| 13724 | ERICH1.3   | 2.05E-166 | -0.2912  | 0.174 | 0.284 | 3.85E-162 | T cells | ERICH1   |
| 13725 | TOB1.1     | 2.29E-166 | 0.281174 | 0.133 | 0.058 | 4.30E-162 | T cells | TOB1     |
| 13726 | MPP1.5     | 6.09E-166 | -0.32403 | 0.06  | 0.137 | 1.14E-161 | T cells | MPP1     |
| 13727 | TMEM156    | 7.61E-166 | -0.30236 | 0.079 | 0.161 | 1.43E-161 | T cells | TMEM156  |
| 13728 | DGKD.3     | 3.45E-165 | -0.3137  | 0.104 | 0.194 | 6.47E-161 | T cells | DGKD     |
| 13729 | COX8A.6    | 4.36E-165 | -0.40279 | 0.593 | 0.636 | 8.19E-161 | T cells | COX8A    |
| 13730 | SERPINB1.  | 8.39E-165 | -0.594   | 0.409 | 0.49  | 1.58E-160 | T cells | SERPINB1 |
| 13731 | TANK.1     | 2.92E-164 | -0.26313 | 0.119 | 0.217 | 5.48E-160 | T cells | TANK     |
| 13732 | EIF4B.4    | 5.11E-163 | 0.303782 | 0.622 | 0.524 | 9.60E-159 | T cells | EIF4B    |
| 13733 | COX17.4    | 8.96E-163 | -0.31259 | 0.244 | 0.362 | 1.68E-158 | T cells | COX17    |
| 13734 | HSPE1.2    | 4.89E-162 | 0.283115 | 0.553 | 0.43  | 9.19E-158 | T cells | HSPE1    |
| 13735 | MEF2A.2    | 2.02E-161 | -0.27042 | 0.095 | 0.183 | 3.80E-157 | T cells | MEF2A    |
| 13736 | RASSF5.5   | 6.26E-160 | 0.320241 | 0.357 | 0.248 | 1.18E-155 | T cells | RASSF5   |
| 13737 | CD55.5     | 1.01E-159 | -0.40197 | 0.364 | 0.478 | 1.91E-155 | T cells | CD55     |
| 13738 | ATF7IP2.1  | 1.58E-159 | 0.296912 | 0.169 | 0.086 | 2.97E-155 | T cells | ATF7IP2  |
| 13739 | GNPDA1.1   | 4.53E-159 | 0.31263  | 0.154 | 0.076 | 8.50E-155 | T cells | GNPDA1   |
| 13740 | PGGHG.2    | 9.26E-159 | 0.295578 | 0.175 | 0.09  | 1.74E-154 | T cells | PGGHG    |
| 13741 | PRKACB.2   | 1.02E-158 | 0.297932 | 0.301 | 0.193 | 1.91E-154 | T cells | PRKACB   |
| 13742 | ZFAND5.3   | 1.46E-158 | -0.30407 | 0.136 | 0.233 | 2.74E-154 | T cells | ZFAND5   |
| 13743 | HIST1H1C.  | 2.38E-158 | -0.33336 | 0.123 | 0.217 | 4.46E-154 | T cells | HIST1H1C |
| 13744 | MTMR14.3   | 2.45E-158 | -0.27128 | 0.184 | 0.294 | 4.60E-154 | T cells | MTMR14   |
| 13745 | BIN2.6     | 4.01E-158 | 0.252843 | 0.554 | 0.432 | 7.53E-154 | T cells | BIN2     |
| 13746 | ORMDL3.2   | 4.05E-158 | 0.294327 | 0.195 | 0.105 | 7.61E-154 | T cells | ORMDL3   |
| 13747 | LSM7.5     | 4.35E-158 | -0.32497 | 0.605 | 0.684 | 8.18E-154 | T cells | LSM7     |
| 13748 | IER2.7     | 7.00E-158 | -0.61489 | 0.45  | 0.551 | 1.32E-153 | T cells | IER2     |
| 13749 | CCDC12.5   | 7.36E-157 | -0.2866  | 0.237 | 0.353 | 1.38E-152 | T cells | CCDC12   |
| 13750 | BCL2.1     | 7.49E-157 | 0.274719 | 0.141 | 0.064 | 1.41E-152 | T cells | BCL2     |
| 13751 | MRFAP1L1   | 7.59E-157 | 0.305102 | 0.332 | 0.223 | 1.43E-152 | T cells | MRFAP1L1 |
| 13752 | CORO1B.4   | 1.36E-156 | 0.441193 | 0.36  | 0.263 | 2.55E-152 | T cells | CORO1B   |
| 13753 | PTPN1.2    | 1.62E-156 | -0.27914 | 0.153 | 0.255 | 3.04E-152 | T cells | PTPN1    |
| 13754 | CLTA.4     | 4.69E-156 | -0.31657 | 0.375 | 0.484 | 8.81E-152 | T cells | CLTA     |
| 13755 | YWHAE.5    | 2.93E-155 | -0.28038 | 0.21  | 0.323 | 5.51E-151 | T cells | YWHAE    |
| 13756 | CFAP36     | 3.44E-155 | 0.259727 | 0.13  | 0.058 | 6.47E-151 | T cells | CFAP36   |
| 13757 | RSL24D1.3  | 6.26E-155 | 0.300209 | 0.595 | 0.493 | 1.18E-150 | T cells | RSL24D1  |
| 13758 | MARCH3.1   | 1.53E-154 | -0.26185 | 0.04  | 0.102 | 2.87E-150 | T cells | Mar-03   |
| 13759 | PGLS.4     | 1.70E-154 | -0.36328 | 0.415 | 0.511 | 3.20E-150 | T cells | PGLS     |
| 13760 | CTSW.8     | 6.77E-154 | -0.44207 | 0.319 | 0.178 | 1.27E-149 | T cells | CTSW     |
| 13761 | AKR1A1.5   | 1.63E-153 | -0.29471 | 0.239 | 0.353 | 3.05E-149 | T cells | AKR1A1   |
| 13762 | C20orf27.3 | 6.75E-152 | -0.34321 | 0.168 | 0.266 | 1.27E-147 | T cells | C20orf27 |
| 13763 | ARHGAP45   | 1.01E-151 | 0.325007 | 0.445 | 0.34  | 1.89E-147 | T cells | ARHGAP45 |
| 13764 | NDUFA12.   | 2.06E-151 | 0.288643 | 0.605 | 0.5   | 3.87E-147 | T cells | NDUFA12  |
| 13765 | EIF1AY.1   | 5.85E-151 | -0.29387 | 0.087 | 0.168 | 1.10E-146 | T cells | EIF1AY   |
| 13766 | DNAJC15.4  | 1.24E-150 | -0.28631 | 0.282 | 0.399 | 2.33E-146 | T cells | DNAJC15  |
| 13767 | HIP1R.1    | 1.79E-150 | -0.27206 | 0.057 | 0.126 | 3.36E-146 | T cells | HIP1R    |
| 13768 | VNN2.1     | 2.90E-150 | -0.40597 | 0.06  | 0.131 | 5.44E-146 | T cells | VNN2     |
| 13769 | ATG3.2     | 2.96E-150 | -0.33059 | 0.237 | 0.344 | 5.55E-146 | T cells | ATG3     |
| 13770 | HSPD1.5    | 5.31E-150 | 0.303434 | 0.502 | 0.395 | 9.98E-146 | T cells | HSPD1    |

|       |           |           |          |       |       |           |         |          |
|-------|-----------|-----------|----------|-------|-------|-----------|---------|----------|
| 13771 | ITGAE     | 1.73E-149 | -0.26582 | 0.134 | 0.229 | 3.25E-145 | T cells | ITGAE    |
| 13772 | TAPBP.2   | 2.15E-149 | -0.30786 | 0.326 | 0.444 | 4.03E-145 | T cells | TAPBP    |
| 13773 | GSTO1.6   | 3.49E-149 | -0.37302 | 0.241 | 0.347 | 6.56E-145 | T cells | GSTO1    |
| 13774 | SPON2.4   | 5.24E-149 | -1.07068 | 0.066 | 0.134 | 9.85E-145 | T cells | SPON2    |
| 13775 | FMNL1.6   | 6.54E-149 | -0.26658 | 0.142 | 0.24  | 1.23E-144 | T cells | FMNL1    |
| 13776 | TMEM63A   | 1.58E-148 | 0.270071 | 0.157 | 0.078 | 2.98E-144 | T cells | TMEM63A  |
| 13777 | ELOVL5.3  | 2.83E-148 | -0.33524 | 0.243 | 0.348 | 5.31E-144 | T cells | ELOVL5   |
| 13778 | BOLA3.2   | 1.26E-147 | 0.310313 | 0.223 | 0.136 | 2.36E-143 | T cells | BOLA3    |
| 13779 | ZNF101.1  | 4.85E-147 | 0.268179 | 0.134 | 0.062 | 9.11E-143 | T cells | ZNF101   |
| 13780 | NAP1L4.3  | 5.10E-147 | 0.318886 | 0.317 | 0.218 | 9.57E-143 | T cells | NAP1L4   |
| 13781 | CCSER2.5  | 8.29E-147 | 0.254015 | 0.162 | 0.082 | 1.56E-142 | T cells | CCSER2   |
| 13782 | PTK2B.2   | 1.31E-146 | -0.29856 | 0.169 | 0.269 | 2.45E-142 | T cells | PTK2B    |
| 13783 | KCNA3.2   | 2.40E-146 | 0.267844 | 0.14  | 0.067 | 4.50E-142 | T cells | KCNA3    |
| 13784 | C9orf78.4 | 5.12E-146 | 0.30282  | 0.433 | 0.329 | 9.62E-142 | T cells | C9orf78  |
| 13785 | ASF1A.1   | 7.63E-146 | 0.294812 | 0.207 | 0.121 | 1.43E-141 | T cells | ASF1A    |
| 13786 | PAXX.6    | 8.60E-146 | 0.268613 | 0.597 | 0.488 | 1.62E-141 | T cells | PAXX     |
| 13787 | HOXB2.3   | 1.05E-145 | 0.268539 | 0.161 | 0.082 | 1.97E-141 | T cells | HOXB2    |
| 13788 | NMRK1.1   | 1.72E-145 | 0.289231 | 0.16  | 0.083 | 3.23E-141 | T cells | NMRK1    |
| 13789 | ARHGAP15  | 3.12E-145 | 0.301143 | 0.419 | 0.306 | 5.87E-141 | T cells | ARHGAP15 |
| 13790 | AP3B1.2   | 3.26E-145 | -0.26949 | 0.117 | 0.205 | 6.12E-141 | T cells | AP3B1    |
| 13791 | DOCK8.3   | 4.90E-145 | -0.30297 | 0.271 | 0.382 | 9.21E-141 | T cells | DOCK8    |
| 13792 | CCDC66.2  | 6.37E-145 | 0.266862 | 0.152 | 0.076 | 1.20E-140 | T cells | CCDC66   |
| 13793 | TSPAN14.3 | 1.25E-144 | 0.311019 | 0.296 | 0.199 | 2.35E-140 | T cells | TSPAN14  |
| 13794 | SLC50A1.3 | 1.44E-144 | -0.27859 | 0.128 | 0.219 | 2.71E-140 | T cells | SLC50A1  |
| 13795 | RASGRP1   | 2.72E-144 | 0.257281 | 0.119 | 0.052 | 5.10E-140 | T cells | RASGRP1  |
| 13796 | S100A4.7  | 3.12E-144 | -1.38555 | 0.532 | 0.547 | 5.86E-140 | T cells | S100A4   |
| 13797 | IGFLR1.2  | 4.51E-143 | -0.25382 | 0.128 | 0.22  | 8.47E-139 | T cells | IGFLR1   |
| 13798 | GNB2.6    | 5.19E-143 | -0.33315 | 0.358 | 0.464 | 9.75E-139 | T cells | GNB2     |
| 13799 | CRLF3.2   | 6.62E-142 | 0.312069 | 0.326 | 0.226 | 1.24E-137 | T cells | CRLF3    |
| 13800 | TPM3.6    | 8.67E-142 | -0.30454 | 0.71  | 0.749 | 1.63E-137 | T cells | TPM3     |
| 13801 | CCT4.3    | 2.21E-141 | 0.271939 | 0.565 | 0.457 | 4.15E-137 | T cells | CCT4     |
| 13802 | PDK1.2    | 2.28E-141 | 0.269204 | 0.128 | 0.059 | 4.28E-137 | T cells | PDK1     |
| 13803 | SMPD1.5   | 4.06E-141 | 0.26832  | 0.173 | 0.093 | 7.63E-137 | T cells | SMPD1    |
| 13804 | MT-ND2.6  | 3.67E-140 | -0.30019 | 0.837 | 0.864 | 6.90E-136 | T cells | MT-ND2   |
| 13805 | CRBN.3    | 9.53E-140 | 0.293936 | 0.298 | 0.201 | 1.79E-135 | T cells | CRBN     |
| 13806 | SRA1.3    | 9.88E-140 | -0.25098 | 0.174 | 0.276 | 1.86E-135 | T cells | SRA1     |
| 13807 | IFNAR1.1  | 2.97E-138 | -0.26255 | 0.163 | 0.261 | 5.59E-134 | T cells | IFNAR1   |
| 13808 | PSMB6.4   | 8.34E-138 | -0.28714 | 0.423 | 0.515 | 1.57E-133 | T cells | PSMB6    |
| 13809 | TNIP1.2   | 9.96E-138 | -0.27085 | 0.215 | 0.319 | 1.87E-133 | T cells | TNIP1    |
| 13810 | CDC42SE2  | 1.27E-137 | 0.306265 | 0.348 | 0.249 | 2.38E-133 | T cells | CDC42SE2 |
| 13811 | ZC3HAV1.3 | 1.39E-137 | 0.318402 | 0.309 | 0.214 | 2.62E-133 | T cells | ZC3HAV1  |
| 13812 | MPG.4     | 1.71E-137 | -0.27352 | 0.24  | 0.349 | 3.21E-133 | T cells | MPG      |
| 13813 | COMT.3    | 6.82E-137 | -0.27308 | 0.185 | 0.285 | 1.28E-132 | T cells | COMT     |
| 13814 | SMAP2.6   | 2.53E-136 | -0.31117 | 0.198 | 0.298 | 4.75E-132 | T cells | SMAP2    |
| 13815 | SMCHD1.2  | 2.76E-136 | -0.3322  | 0.342 | 0.451 | 5.18E-132 | T cells | SMCHD1   |
| 13816 | MRPL52.4  | 3.34E-136 | -0.29957 | 0.361 | 0.466 | 6.27E-132 | T cells | MRPL52   |
| 13817 | PGAM1.6   | 6.30E-136 | -0.3371  | 0.463 | 0.537 | 1.18E-131 | T cells | PGAM1    |

|       |           |           |          |       |       |           |         |           |
|-------|-----------|-----------|----------|-------|-------|-----------|---------|-----------|
| 13818 | ENOSF1    | 8.42E-136 | 0.252437 | 0.106 | 0.045 | 1.58E-131 | T cells | ENOSF1    |
| 13819 | THYN1.4   | 7.06E-135 | 0.303047 | 0.312 | 0.221 | 1.33E-130 | T cells | THYN1     |
| 13820 | DNMT1.4   | 1.59E-134 | 0.292164 | 0.256 | 0.166 | 2.98E-130 | T cells | DNMT1     |
| 13821 | SETX.3    | 3.48E-134 | -0.25266 | 0.142 | 0.234 | 6.54E-130 | T cells | SETX      |
| 13822 | C4orf48.6 | 5.30E-134 | -0.4272  | 0.256 | 0.352 | 9.95E-130 | T cells | C4orf48   |
| 13823 | SPG21.2   | 6.45E-134 | -0.27173 | 0.24  | 0.346 | 1.21E-129 | T cells | SPG21     |
| 13824 | TKT.6     | 6.87E-134 | -0.65104 | 0.491 | 0.53  | 1.29E-129 | T cells | TKT       |
| 13825 | HIST1H2AC | 6.88E-133 | -0.58467 | 0.158 | 0.248 | 1.29E-128 | T cells | HIST1H2AC |
| 13826 | BEX4.4    | 1.99E-132 | 0.259079 | 0.289 | 0.19  | 3.73E-128 | T cells | BEX4      |
| 13827 | CASP4.3   | 4.01E-132 | -0.27328 | 0.243 | 0.349 | 7.54E-128 | T cells | CASP4     |
| 13828 | SEC11A.5  | 5.30E-132 | -0.30609 | 0.387 | 0.483 | 9.96E-128 | T cells | SEC11A    |
| 13829 | LAP3.3    | 8.89E-132 | -0.25381 | 0.14  | 0.231 | 1.67E-127 | T cells | LAP3      |
| 13830 | NSMCE1.2  | 1.75E-130 | 0.30373  | 0.377 | 0.28  | 3.29E-126 | T cells | NSMCE1    |
| 13831 | PSMB10.5  | 3.72E-129 | -0.29572 | 0.55  | 0.632 | 7.00E-125 | T cells | PSMB10    |
| 13832 | CDKN2D.5  | 7.74E-129 | -0.27527 | 0.155 | 0.246 | 1.45E-124 | T cells | CDKN2D    |
| 13833 | NAA38.4   | 1.56E-128 | -0.30853 | 0.349 | 0.45  | 2.92E-124 | T cells | NAA38     |
| 13834 | SSH2.3    | 4.17E-128 | -0.29449 | 0.225 | 0.324 | 7.83E-124 | T cells | SSH2      |
| 13835 | CAPZA2.5  | 7.83E-128 | -0.2994  | 0.301 | 0.402 | 1.47E-123 | T cells | CAPZA2    |
| 13836 | MX1.3     | 8.50E-128 | -0.29363 | 0.15  | 0.238 | 1.60E-123 | T cells | MX1       |
| 13837 | UCP2.7    | 8.58E-128 | -0.28171 | 0.762 | 0.8   | 1.61E-123 | T cells | UCP2      |
| 13838 | STAT6.3   | 9.93E-128 | -0.26587 | 0.157 | 0.247 | 1.86E-123 | T cells | STAT6     |
| 13839 | NOP10.3   | 1.09E-127 | -0.33398 | 0.504 | 0.576 | 2.04E-123 | T cells | NOP10     |
| 13840 | MAD1L1.3  | 3.52E-127 | 0.289579 | 0.32  | 0.225 | 6.62E-123 | T cells | MAD1L1    |
| 13841 | LAMTOR4.  | 6.05E-127 | -0.33131 | 0.577 | 0.636 | 1.14E-122 | T cells | LAMTOR4   |
| 13842 | ENY2.2    | 5.51E-126 | -0.28129 | 0.265 | 0.367 | 1.04E-121 | T cells | ENY2      |
| 13843 | TMEM179   | 7.36E-126 | -0.26761 | 0.313 | 0.423 | 1.38E-121 | T cells | TMEM179B  |
| 13844 | JAK3.1    | 8.17E-125 | 0.283451 | 0.252 | 0.165 | 1.53E-120 | T cells | JAK3      |
| 13845 | RASSF1.4  | 1.72E-124 | -0.25635 | 0.146 | 0.234 | 3.22E-120 | T cells | RASSF1    |
| 13846 | CEBPB.2   | 3.97E-124 | -0.26357 | 0.082 | 0.153 | 7.47E-120 | T cells | CEBPB     |
| 13847 | COX5B.3   | 8.82E-124 | -0.25087 | 0.749 | 0.765 | 1.66E-119 | T cells | COX5B     |
| 13848 | FKBP1A.5  | 1.12E-123 | -0.36242 | 0.564 | 0.606 | 2.10E-119 | T cells | FKBP1A    |
| 13849 | PRDX1.6   | 1.25E-123 | -0.339   | 0.511 | 0.568 | 2.35E-119 | T cells | PRDX1     |
| 13850 | IKZF3.6   | 4.97E-123 | -0.28709 | 0.121 | 0.201 | 9.33E-119 | T cells | IKZF3     |
| 13851 | RABAC1.4  | 8.78E-123 | -0.2773  | 0.424 | 0.522 | 1.65E-118 | T cells | RABAC1    |
| 13852 | LYPLA1.1  | 1.23E-122 | -0.25456 | 0.248 | 0.351 | 2.30E-118 | T cells | LYPLA1    |
| 13853 | WDR83OS.  | 1.79E-122 | -0.25879 | 0.566 | 0.636 | 3.36E-118 | T cells | WDR83OS   |
| 13854 | SCAND1.3  | 4.35E-121 | -0.27639 | 0.408 | 0.508 | 8.17E-117 | T cells | SCAND1    |
| 13855 | ARF1.5    | 5.22E-121 | -0.25731 | 0.597 | 0.66  | 9.80E-117 | T cells | ARF1      |
| 13856 | TXN.6     | 1.94E-120 | -0.48075 | 0.321 | 0.405 | 3.65E-116 | T cells | TXN       |
| 13857 | ATP6V1F.3 | 2.38E-120 | -0.28582 | 0.451 | 0.538 | 4.47E-116 | T cells | ATP6V1F   |
| 13858 | MTRNR2L1  | 2.63E-120 | -0.27144 | 0.938 | 0.95  | 4.94E-116 | T cells | MTRNR2L12 |
| 13859 | SUPT4H1.6 | 4.83E-120 | -0.26441 | 0.285 | 0.389 | 9.08E-116 | T cells | SUPT4H1   |
| 13860 | EBLN3P.4  | 1.05E-119 | -0.32947 | 0.184 | 0.27  | 1.97E-115 | T cells | EBLN3P    |
| 13861 | INSIG1.3  | 1.46E-118 | -0.28869 | 0.087 | 0.158 | 2.75E-114 | T cells | INSIG1    |
| 13862 | ZNF428.5  | 2.77E-118 | 0.257872 | 0.372 | 0.275 | 5.20E-114 | T cells | ZNF428    |
| 13863 | CDK2AP2.4 | 3.29E-118 | -0.3     | 0.275 | 0.375 | 6.19E-114 | T cells | CDK2AP2   |
| 13864 | LRRFIP1.5 | 5.03E-118 | -0.30529 | 0.414 | 0.502 | 9.44E-114 | T cells | LRRFIP1   |



|       |            |           |          |       |       |           |         |            |
|-------|------------|-----------|----------|-------|-------|-----------|---------|------------|
| 13865 | KLRD1.4    | 5.27E-118 | -0.59494 | 0.069 | 0.131 | 9.89E-114 | T cells | KLRD1      |
| 13866 | GOLGA7.4   | 6.33E-118 | 0.279346 | 0.32  | 0.232 | 1.19E-113 | T cells | GOLGA7     |
| 13867 | RTN3.5     | 5.28E-117 | -0.25253 | 0.14  | 0.227 | 9.93E-113 | T cells | RTN3       |
| 13868 | TTC39C.3   | 6.81E-117 | 0.260747 | 0.157 | 0.088 | 1.28E-112 | T cells | TTC39C     |
| 13869 | IL27RA.2   | 8.58E-117 | 0.287411 | 0.302 | 0.214 | 1.61E-112 | T cells | IL27RA     |
| 13870 | DNAJC4.3   | 9.86E-117 | -0.25986 | 0.263 | 0.365 | 1.85E-112 | T cells | DNAJC4     |
| 13871 | DGCR6L.4   | 1.67E-116 | 0.287591 | 0.297 | 0.213 | 3.13E-112 | T cells | DGCR6L     |
| 13872 | ANP32A.2   | 2.60E-116 | -0.28772 | 0.427 | 0.522 | 4.88E-112 | T cells | ANP32A     |
| 13873 | FKBP5.4    | 8.81E-116 | 0.26304  | 0.178 | 0.107 | 1.65E-111 | T cells | FKBP5      |
| 13874 | SUN2.5     | 2.20E-115 | 0.261492 | 0.329 | 0.237 | 4.14E-111 | T cells | SUN2       |
| 13875 | TRBC2.6    | 2.95E-115 | 0.253037 | 0.739 | 0.606 | 5.55E-111 | T cells | TRBC2      |
| 13876 | TBC1D10A   | 3.48E-115 | 0.25672  | 0.233 | 0.151 | 6.53E-111 | T cells | TBC1D10A   |
| 13877 | COPE.4     | 1.22E-114 | -0.27456 | 0.448 | 0.528 | 2.28E-110 | T cells | COPE       |
| 13878 | BACH2.6    | 1.82E-114 | -0.49346 | 0.169 | 0.239 | 3.43E-110 | T cells | BACH2      |
| 13879 | CD69.4     | 3.56E-113 | 0.26353  | 0.286 | 0.192 | 6.69E-109 | T cells | CD69       |
| 13880 | AOAH.7     | 2.25E-111 | -0.28945 | 0.096 | 0.166 | 4.22E-107 | T cells | AOAH       |
| 13881 | DOCK10.2   | 2.77E-111 | 0.261659 | 0.196 | 0.122 | 5.20E-107 | T cells | DOCK10     |
| 13882 | CST7.5     | 3.49E-111 | -0.77143 | 0.135 | 0.21  | 6.55E-107 | T cells | CST7       |
| 13883 | PAFAH1B3   | 5.21E-110 | 0.292286 | 0.215 | 0.141 | 9.79E-106 | T cells | PAFAH1B3   |
| 13884 | ATP2A3.5   | 1.98E-109 | -0.25957 | 0.151 | 0.231 | 3.73E-105 | T cells | ATP2A3     |
| 13885 | NDUFB7.7   | 2.85E-109 | -0.28703 | 0.417 | 0.504 | 5.35E-105 | T cells | NDUFB7     |
| 13886 | ZFAND1.2   | 9.87E-109 | 0.27032  | 0.244 | 0.166 | 1.85E-104 | T cells | ZFAND1     |
| 13887 | CTSA.4     | 2.71E-108 | -0.30318 | 0.163 | 0.248 | 5.09E-104 | T cells | CTSA       |
| 13888 | JUNB.5     | 5.67E-108 | -0.58912 | 0.552 | 0.594 | 1.07E-103 | T cells | JUNB       |
| 13889 | FYN.5      | 1.80E-107 | 0.251217 | 0.196 | 0.121 | 3.38E-103 | T cells | FYN        |
| 13890 | ARID5A.4   | 2.67E-107 | 0.253633 | 0.225 | 0.145 | 5.01E-103 | T cells | ARID5A     |
| 13891 | STX10.3    | 4.14E-107 | -0.26216 | 0.22  | 0.31  | 7.78E-103 | T cells | STX10      |
| 13892 | ELOB.4     | 4.19E-106 | -0.28604 | 0.75  | 0.751 | 7.87E-102 | T cells | ELOB       |
| 13893 | VAMP8.6    | 9.07E-106 | -0.31704 | 0.559 | 0.609 | 1.70E-101 | T cells | VAMP8      |
| 13894 | LSM5.2     | 1.19E-105 | 0.265758 | 0.412 | 0.325 | 2.24E-101 | T cells | LSM5       |
| 13895 | AC004687.1 | 1.82E-105 | -0.28202 | 0.183 | 0.267 | 3.42E-101 | T cells | AC004687.1 |
| 13896 | SP110.2    | 1.95E-105 | -0.27675 | 0.309 | 0.4   | 3.67E-101 | T cells | SP110      |
| 13897 | SELENOF.4  | 4.10E-105 | -0.29329 | 0.417 | 0.505 | 7.71E-101 | T cells | SELENOF    |
| 13898 | GPR65.6    | 9.38E-105 | -0.26601 | 0.149 | 0.229 | 1.76E-100 | T cells | GPR65      |
| 13899 | RAB11A.4   | 1.88E-104 | -0.28013 | 0.27  | 0.367 | 3.53E-100 | T cells | RAB11A     |
| 13900 | JUN.5      | 2.19E-104 | -0.37624 | 0.135 | 0.209 | 4.12E-100 | T cells | JUN        |
| 13901 | PAK2.3     | 2.44E-103 | -0.25614 | 0.324 | 0.418 | 4.58E-99  | T cells | PAK2       |
| 13902 | SEC62.3    | 2.91E-103 | -0.33061 | 0.489 | 0.566 | 5.46E-99  | T cells | SEC62      |
| 13903 | TOMM20.5   | 5.70E-103 | 0.253495 | 0.501 | 0.42  | 1.07E-98  | T cells | TOMM20     |
| 13904 | IKZF1.2    | 7.90E-103 | 0.272752 | 0.403 | 0.318 | 1.48E-98  | T cells | IKZF1      |
| 13905 | AL138963.3 | 1.54E-102 | 0.523531 | 0.252 | 0.175 | 2.89E-98  | T cells | AL138963.3 |
| 13906 | CCL4.7     | 1.55E-102 | -0.75421 | 0.076 | 0.137 | 2.91E-98  | T cells | CCL4       |
| 13907 | ABHD14B.4  | 2.43E-102 | 0.256149 | 0.381 | 0.292 | 4.56E-98  | T cells | ABHD14B    |
| 13908 | ADIPOR1.2  | 3.11E-102 | -0.28336 | 0.211 | 0.301 | 5.84E-98  | T cells | ADIPOR1    |
| 13909 | SPCS2.4    | 9.10E-102 | -0.30222 | 0.381 | 0.463 | 1.71E-97  | T cells | SPCS2      |
| 13910 | ALDOA.5    | 3.91E-101 | -0.4735  | 0.637 | 0.648 | 7.34E-97  | T cells | ALDOA      |
| 13911 | SASH3.4    | 4.66E-101 | -0.25172 | 0.288 | 0.383 | 8.76E-97  | T cells | SASH3      |

|       |           |           |          |       |       |                  |           |
|-------|-----------|-----------|----------|-------|-------|------------------|-----------|
| 13912 | JPT1.6    | 1.09E-100 | -0.28623 | 0.267 | 0.356 | 2.06E-96 T cells | JPT1      |
| 13913 | H2AFY.3   | 1.38E-100 | -0.27147 | 0.284 | 0.372 | 2.60E-96 T cells | H2AFY     |
| 13914 | MTDH.3    | 1.88E-100 | -0.27977 | 0.398 | 0.48  | 3.54E-96 T cells | MTDH      |
| 13915 | SQSTM1.5  | 3.25E-100 | -0.26865 | 0.398 | 0.49  | 6.10E-96 T cells | SQSTM1    |
| 13916 | NT5C3A.3  | 5.49E-100 | -0.28986 | 0.174 | 0.255 | 1.03E-95 T cells | NT5C3A    |
| 13917 | NKG7.7    | 1.59E-99  | -0.99196 | 0.169 | 0.243 | 2.98E-95 T cells | NKG7      |
| 13918 | STAT1.4   | 6.02E-99  | 0.387151 | 0.321 | 0.244 | 1.13E-94 T cells | STAT1     |
| 13919 | LAGE3.2   | 6.80E-99  | 0.281219 | 0.27  | 0.196 | 1.28E-94 T cells | LAGE3     |
| 13920 | RNH1.3    | 1.39E-98  | -0.31269 | 0.341 | 0.418 | 2.62E-94 T cells | RNH1      |
| 13921 | P2RY10.3  | 1.72E-95  | -0.2635  | 0.087 | 0.147 | 3.22E-91 T cells | P2RY10    |
| 13922 | EEF1G.3   | 1.47E-94  | 0.261184 | 0.246 | 0.172 | 2.75E-90 T cells | EEF1G     |
| 13923 | CHURC1.2  | 2.68E-93  | 0.272739 | 0.388 | 0.311 | 5.04E-89 T cells | CHURC1    |
| 13924 | CLIC3.7   | 4.53E-92  | -0.97038 | 0.082 | 0.136 | 8.50E-88 T cells | CLIC3     |
| 13925 | HMGN2.3   | 1.89E-90  | -0.29506 | 0.739 | 0.767 | 3.55E-86 T cells | HMGN2     |
| 13926 | NUAK2.5   | 4.15E-89  | -0.2513  | 0.108 | 0.17  | 7.80E-85 T cells | NUAK2     |
| 13927 | ITGB2-AS1 | 4.47E-89  | 0.271924 | 0.286 | 0.212 | 8.40E-85 T cells | ITGB2-AS1 |
| 13928 | SEC61B.6  | 7.78E-89  | -0.31449 | 0.561 | 0.601 | 1.46E-84 T cells | SEC61B    |
| 13929 | STK38.4   | 1.06E-87  | 0.256087 | 0.351 | 0.275 | 1.99E-83 T cells | STK38     |
| 13930 | KDEL2.3   | 1.81E-87  | -0.26069 | 0.221 | 0.3   | 3.40E-83 T cells | KDEL2     |
| 13931 | FAM49B.4  | 2.37E-87  | -0.26147 | 0.39  | 0.475 | 4.45E-83 T cells | FAM49B    |
| 13932 | CARS.2    | 2.43E-86  | 0.262732 | 0.187 | 0.125 | 4.56E-82 T cells | CARS      |
| 13933 | LY6E.5    | 4.52E-85  | -0.32682 | 0.621 | 0.649 | 8.48E-81 T cells | LY6E      |
| 13934 | GAPDH.6   | 4.33E-84  | -0.59452 | 0.919 | 0.883 | 8.13E-80 T cells | GAPDH     |
| 13935 | FKBP2.3   | 3.92E-83  | -0.25007 | 0.253 | 0.333 | 7.36E-79 T cells | FKBP2     |
| 13936 | PSMA1.2   | 4.64E-82  | 0.252986 | 0.339 | 0.269 | 8.71E-78 T cells | PSMA1     |
| 13937 | NECAP2.1  | 5.28E-82  | 0.2641   | 0.321 | 0.25  | 9.92E-78 T cells | NECAP2    |
| 13938 | DHRS7.5   | 2.35E-79  | -0.26963 | 0.293 | 0.377 | 4.41E-75 T cells | DHRS7     |
| 13939 | TPR.3     | 7.40E-74  | 0.310267 | 0.416 | 0.355 | 1.39E-69 T cells | TPR       |
| 13940 | UBB.6     | 4.08E-73  | -0.25017 | 0.796 | 0.816 | 7.66E-69 T cells | UBB       |
| 13941 | STOM.5    | 4.31E-73  | -0.25429 | 0.087 | 0.141 | 8.10E-69 T cells | STOM      |
| 13942 | MYDGF.4   | 7.17E-71  | -0.32263 | 0.265 | 0.334 | 1.35E-66 T cells | MYDGF     |
| 13943 | PECAM1.4  | 1.76E-70  | -0.29918 | 0.145 | 0.205 | 3.31E-66 T cells | PECAM1    |
| 13944 | SNHG7.6   | 4.14E-70  | -0.3485  | 0.242 | 0.304 | 7.78E-66 T cells | SNHG7     |
| 13945 | GZMH.7    | 3.43E-66  | -0.25239 | 0.077 | 0.127 | 6.45E-62 T cells | GZMH      |
| 13946 | ID3.5     | 6.32E-66  | -0.35929 | 0.177 | 0.236 | 1.19E-61 T cells | ID3       |
| 13947 | SSR3.4    | 3.10E-65  | -0.2859  | 0.251 | 0.319 | 5.83E-61 T cells | SSR3      |
| 13948 | CMC1.4    | 1.43E-61  | -0.28163 | 0.125 | 0.182 | 2.68E-57 T cells | CMC1      |
| 13949 | FGFBP2.8  | 1.32E-52  | -0.57692 | 0.081 | 0.122 | 2.49E-48 T cells | FGFBP2    |
| 13950 | DUSP2.6   | 5.07E-52  | 0.360714 | 0.159 | 0.111 | 9.53E-48 T cells | DUSP2     |
| 13951 | SDCBP.4   | 1.38E-49  | -0.27915 | 0.324 | 0.375 | 2.60E-45 T cells | SDCBP     |
| 13952 | CALR.5    | 6.21E-44  | -0.32024 | 0.595 | 0.614 | 1.17E-39 T cells | CALR      |
| 13953 | TUBA1B.6  | 2.44E-43  | -0.42976 | 0.503 | 0.533 | 4.58E-39 T cells | TUBA1B    |
| 13954 | TSC22D3.4 | 4.15E-41  | -0.33943 | 0.607 | 0.629 | 7.80E-37 T cells | TSC22D3   |
| 13955 | LYAR.7    | 3.53E-40  | 0.322415 | 0.182 | 0.142 | 6.64E-36 T cells | LYAR      |
| 13956 | CSTB.4    | 1.56E-37  | -0.34864 | 0.458 | 0.473 | 2.93E-33 T cells | CSTB      |
| 13957 | ITM2C.5   | 8.60E-36  | -0.37371 | 0.134 | 0.17  | 1.62E-31 T cells | ITM2C     |
| 13958 | PPIB.6    | 3.38E-35  | -0.34375 | 0.8   | 0.78  | 6.35E-31 T cells | PPIB      |

|       |           |          |          |       |       |          |         |         |
|-------|-----------|----------|----------|-------|-------|----------|---------|---------|
| 13959 | S100A6.7  | 5.27E-34 | -1.42829 | 0.853 | 0.635 | 9.90E-30 | T cells | S100A6  |
| 13960 | ITGB2.8   | 1.44E-33 | -0.47634 | 0.673 | 0.617 | 2.71E-29 | T cells | ITGB2   |
| 13961 | ISG20.6   | 5.82E-32 | -0.29272 | 0.569 | 0.554 | 1.09E-27 | T cells | ISG20   |
| 13962 | APMAP.5   | 8.73E-30 | -0.29882 | 0.2   | 0.24  | 1.64E-25 | T cells | APMAP   |
| 13963 | IL2RB.3   | 2.20E-29 | -0.36102 | 0.075 | 0.102 | 4.14E-25 | T cells | IL2RB   |
| 13964 | HMGB2.6   | 7.32E-25 | -0.26566 | 0.254 | 0.289 | 1.38E-20 | T cells | HMGB2   |
| 13965 | CTSC.7    | 1.15E-21 | -0.348   | 0.321 | 0.348 | 2.15E-17 | T cells | CTSC    |
| 13966 | IFITM2.7  | 1.55E-21 | -1.04405 | 0.851 | 0.797 | 2.91E-17 | T cells | IFITM2  |
| 13967 | FCMR.7    | 3.74E-21 | -0.33795 | 0.597 | 0.553 | 7.02E-17 | T cells | FCMR    |
| 13968 | S100A10.5 | 2.12E-17 | -0.59614 | 0.696 | 0.535 | 3.98E-13 | T cells | S100A10 |
| 13969 | GZMA.7    | 2.82E-16 | -0.6131  | 0.128 | 0.147 | 5.31E-12 | T cells | GZMA    |
| 13970 | HSP90B1.6 | 8.87E-14 | -0.43893 | 0.5   | 0.51  | 1.67E-09 | T cells | HSP90B1 |
| 13971 | AIF1.8    | 1.78E-09 | -1.65941 | 0.303 | 0.269 | 3.35E-05 | T cells | AIF1    |
| 13972 | VSIR.4    | 9.54E-09 | -0.35267 | 0.411 | 0.395 | 0.000179 | T cells | VSIR    |
