# Supplementary material for: Integrative Analysis of Clinical and Bioinformatics Databases to Reveal the Role of Peripheral Innate Immunity in Kawasaki Disease
Source: Hindawi journal article supplement (doi:10.1155/2023/6699050), 2023-11-14

Dissolution Cure of RT-qPCR Experimental Genes.

IL-1R1


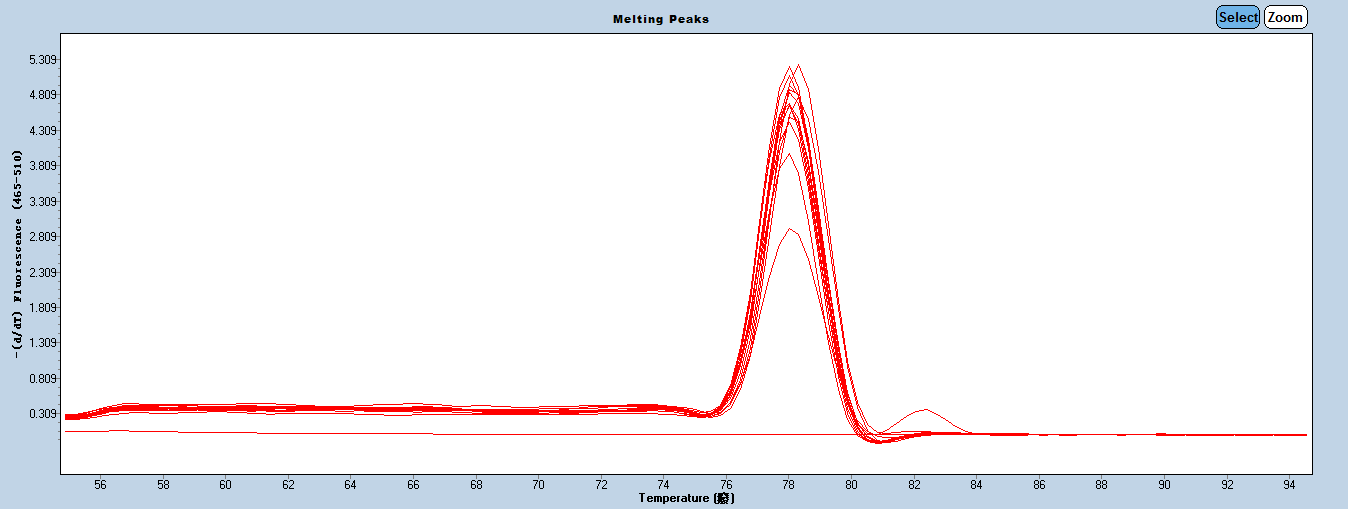


IL-1R2


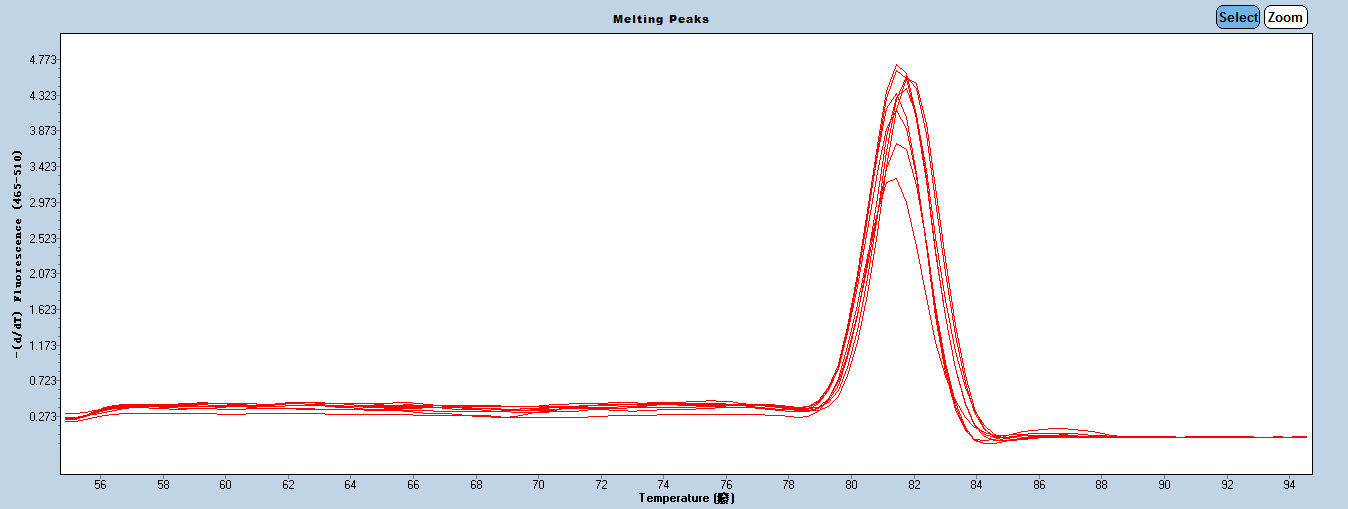


IL-1RN


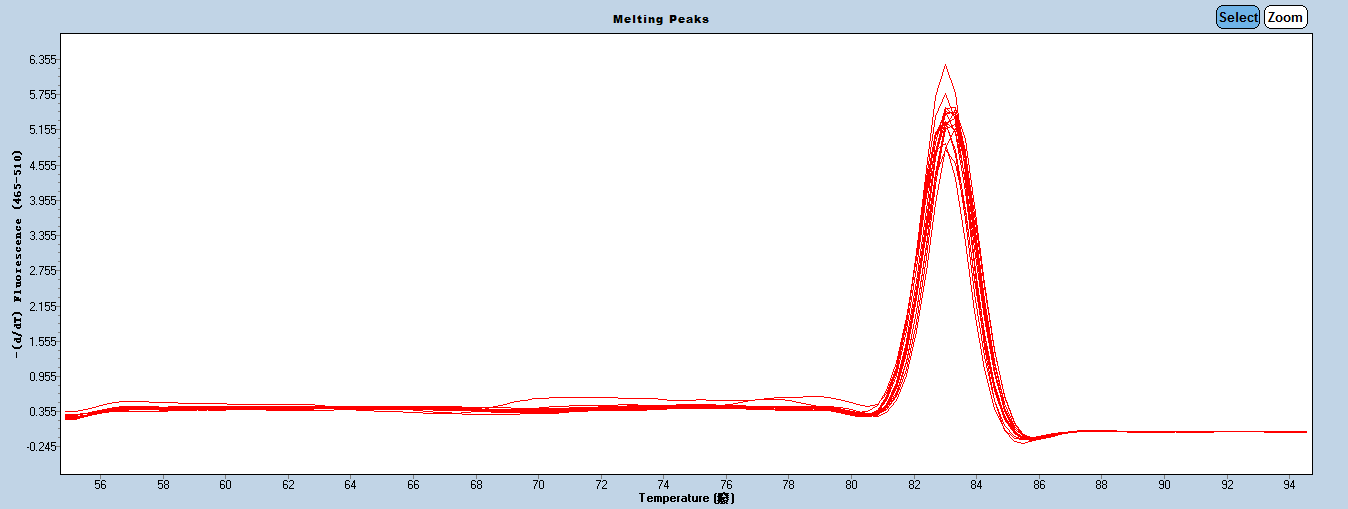


IL-1B


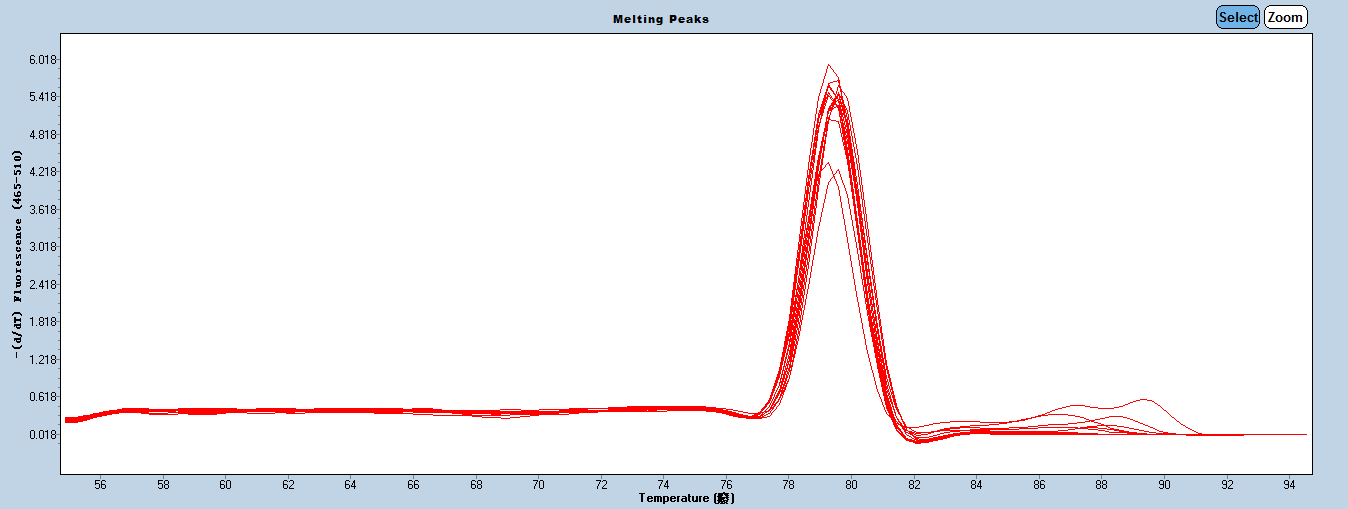


IL-4R


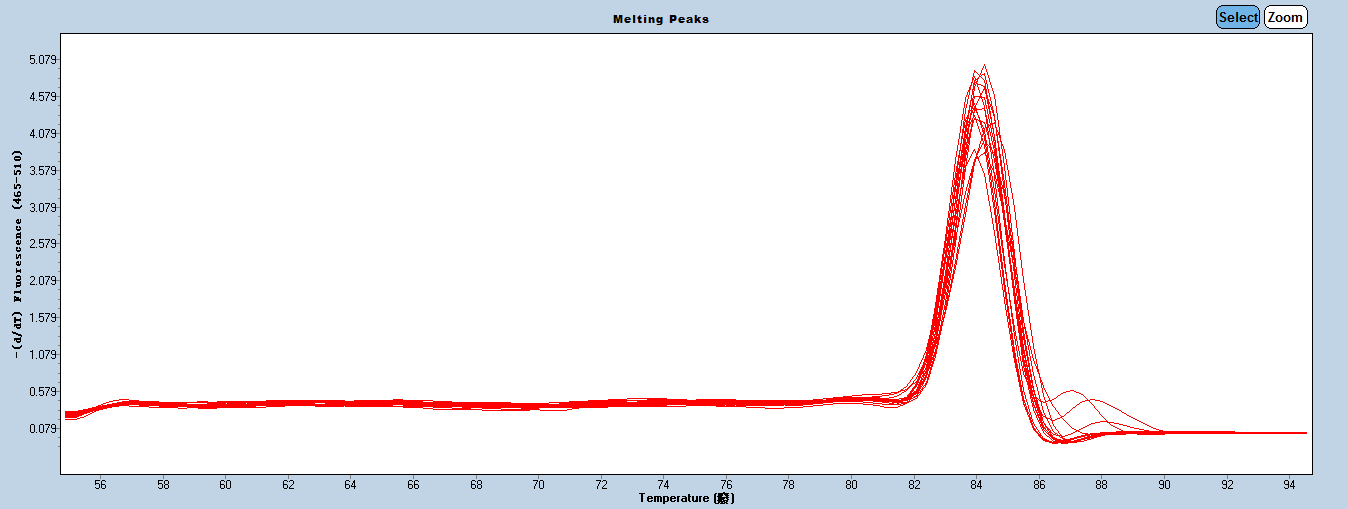


IL-10RB


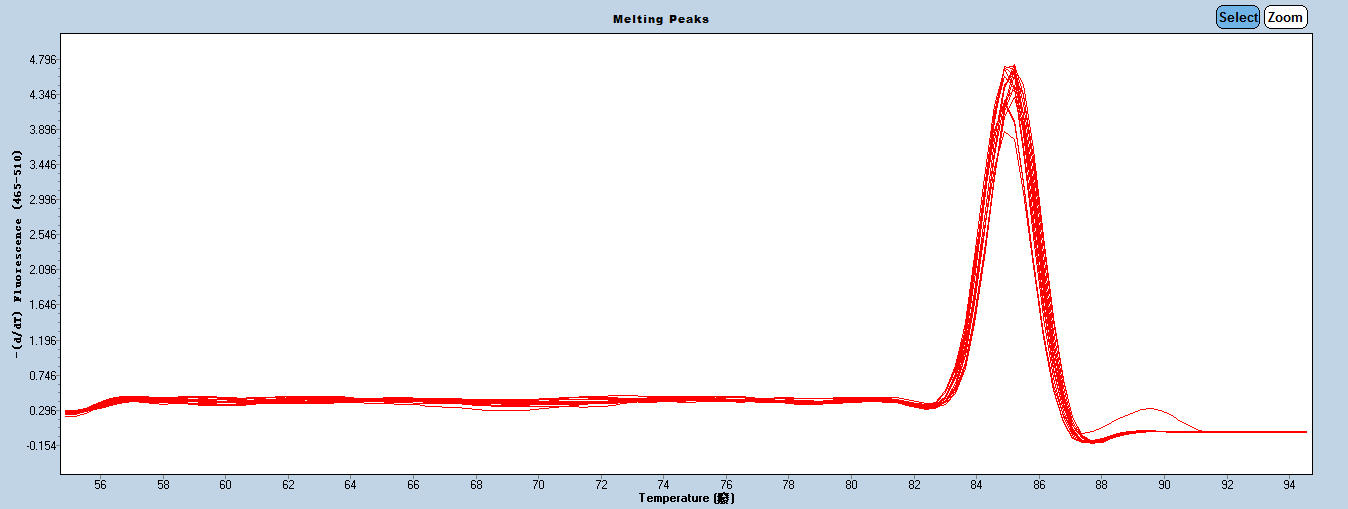


IFNGR1
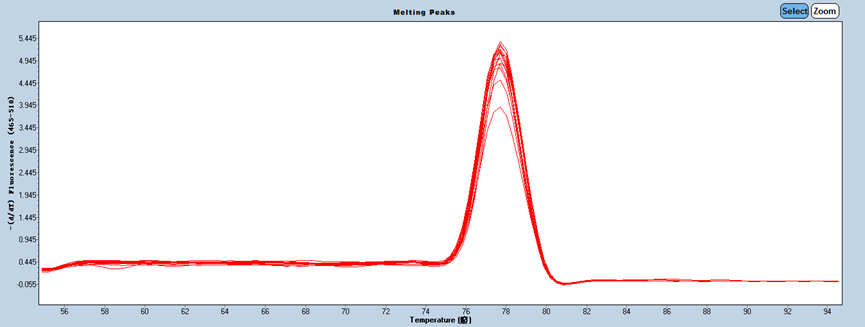


CCR1


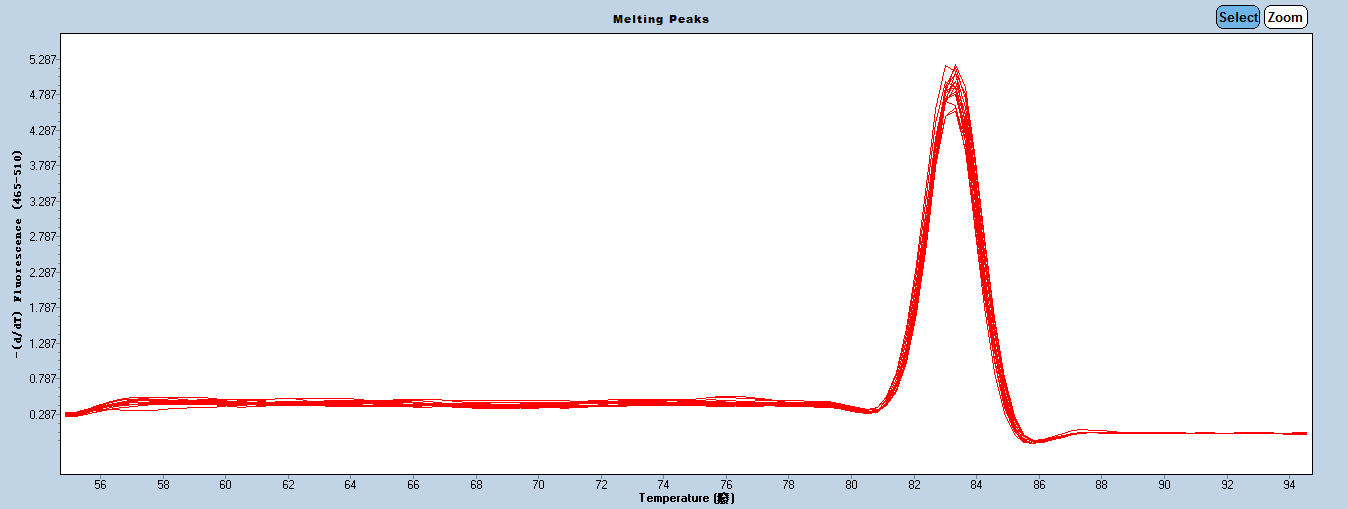


TLR8


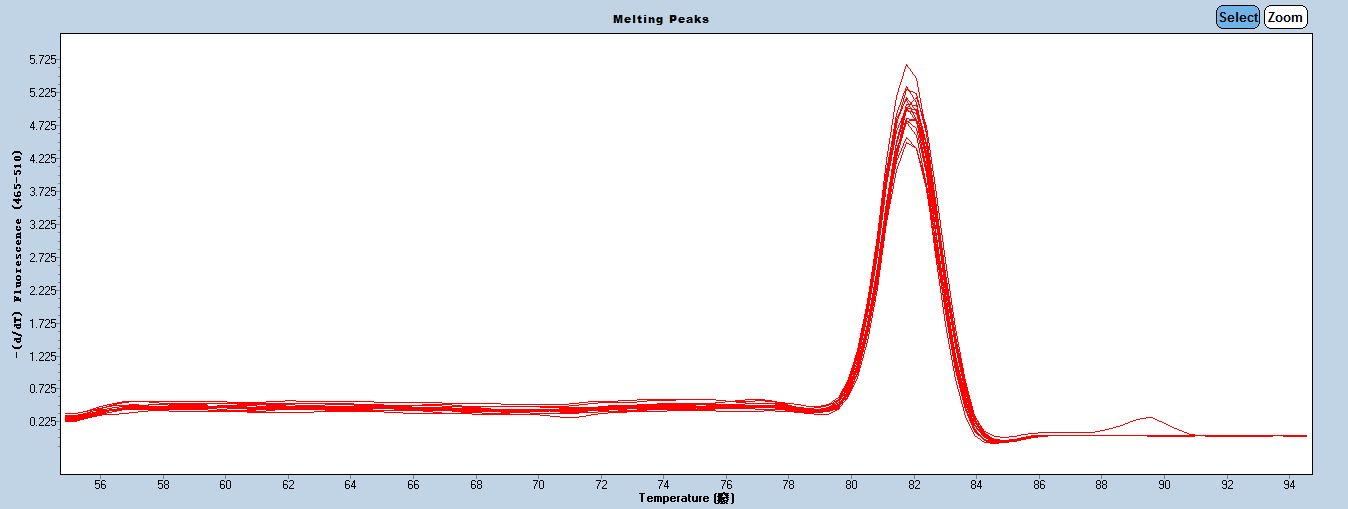


SOCS3


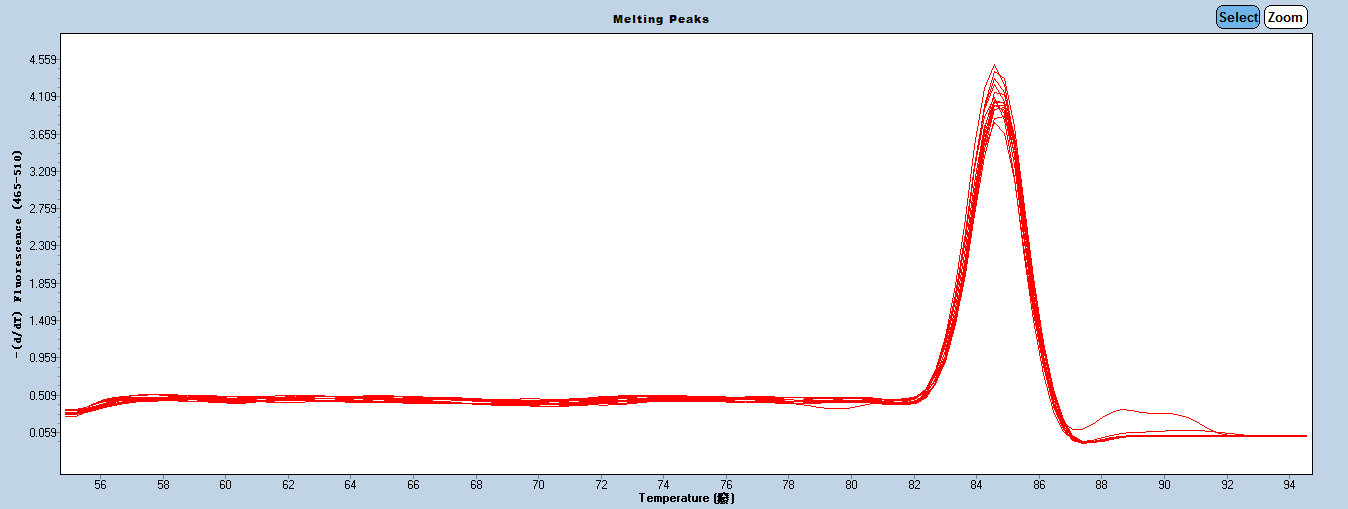


GAPDH


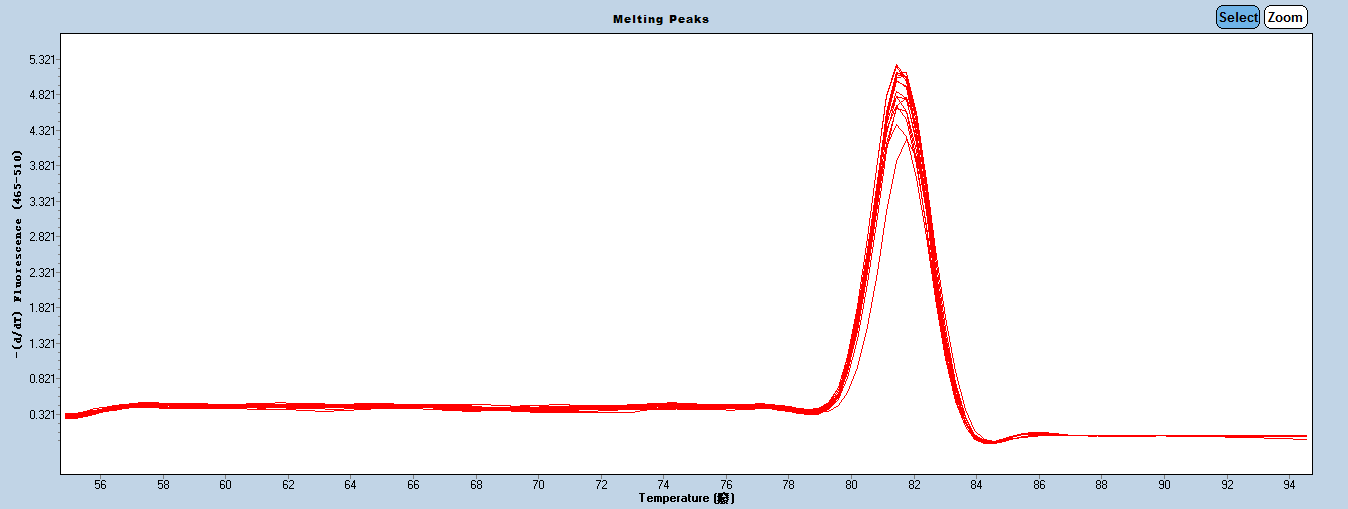

Supplement: f1 [file 6699050.f1.zip › Dissolution_Cure_of_RT-qPCR_Experimental_Genes.DOCX]
