# Supplementary material for: Integrative Analysis of Clinical and Bioinformatics Databases to Reveal the Role of Peripheral Innate Immunity in Kawasaki Disease
Source: Hindawi journal article supplement (doi:10.1155/2023/6699050), 2023-11-14
Supplement: f1 [file 6699050.f1.zip › Supplementary figure and table captions.docx]

Figure S1 Genes (features), counts, and mitochondrial gene percentage of each samples. The X-axis represents the source of the sample. The Y-axis represents the number of genes detected in each cell (left), the total number of molecules detected within a cell (middle) and mitochondrial gene percentage (right).

Figure S2 Marker genes in each cluster.

Figure S3 Marker genes in myeloid cells.

Dissolution Cure of RT-qPCR Experimental Genes.

Table S1 All marker-celltype-deg.csv

Table S2 381-IRG.csv

Table S3 GSE18606_DEG_IRG_289

Table S4 GSE18606-deg-Respond_nonrespond_Acute.csv
