# Supplementary material for: Integrative Analysis of Clinical and Bioinformatics Databases to Reveal the Role of Peripheral Innate Immunity in Kawasaki Disease
Source: Hindawi journal article supplement (doi:10.1155/2023/6699050), 2023-11-14
Supplement: f1 [file 6699050.f1.zip › Table_S3_gse18606_DEG_IRG_289.pdf]

x

- 1 DEFA3
- 2 CAMP
- 3 GIPR
- 4 MMP9
- 5 FGF12
- 6 RETN
- 7 PRTN3
- 8 AZU1
- 9 MPO
- 10 CMTM2
- 11 IL1RL2
- 12 GRP
- 13 SEMA3B
- 14 GPR17
- 15 CMTM5
- 16 CTSG
- 17 DEFA5
- 18 SEMA6B
- 19 FPR1
- 20 MCHR2
- 21 ESRRB
- 22 RXFP3
- 23 CSF3R
- 24 VAV2
- 25 NR2F1
- 26 CCL16
- 27 GALR3
- 28 CHIT1
- 29 INHBC
- 30 VTN
- 31 HTR3E
- 32 PPP3R2
- 33 IL1F10
- 34 SECTM1
- 35 PDGFA
- 36 CCL17
- 37 IL1RN
- 38 RNASE3
- 39 NPPA
- 40 AMBN
- 41 RNASE2
- 42 S1PR2
- 43 HSPA1A
- 44 AVPR1B
- 45 PSPN
- 46 CHGA

47 CCL19  
48 PRLH  
49 SLIT2  
50 INS  
51 IL27  
52 FAM3D  
53 PPBP  
54 INHBB  
55 PROK2  
56 NR0B2  
57 ACVR1B  
58 TNFSF9  
59 SOCS3  
60 SORT1  
61 MARCO  
62 LEFTY2  
63 PF4  
64 ADCYAP1R1  
65 TNFRSF1B  
66 CCR6  
67 CXCR1  
68 AVP  
69 SRC  
70 CD70  
71 SLC11A1  
72 GHRL  
73 TNFSF14  
74 C3AR1  
75 RETNLB  
76 OPRD1  
77 PPY  
78 IL17A  
79 OSMR  
80 APOBEC3C  
81 TNFRSF9  
82 GIP  
83 CRLF1  
84 PTPN6  
85 ISG15  
86 IL17C  
87 PLAUR  
88 NFKBIB  
89 RAC3  
90 NR5A2  
91 IL12RB1  
92 EGFR  
93 CHP2

94 TFR2  
95 CRHR1  
96 RNASE7  
97 LTBR  
98 APLN  
99 LECT2  
100 PLA2G2A  
101 SDC4  
102 CXCL16  
103 NR2F2  
104 INHA  
105 TYROBP  
106 GDF5  
107 UCN3  
108 ESM1  
109 CXCR2  
110 OSM  
111 CRLF2  
112 DEFB4A  
113 CGB2  
114 PLXNB3  
115 RLN3  
116 TSHB  
117 LTB4R  
118 CXCL2  
119 RAC1  
120 NR5A1  
121 FGF13  
122 SEMA4A  
123 CCL21  
124 IGLV6-57  
125 NFKBIZ  
126 CSF2RB  
127 CD14  
128 AREG  
129 IAPP  
130 ARTN  
131 ELN  
132 MAPK14  
133 PTAFR  
134 THPO  
135 PRLHR  
136 CXCL1  
137 ADM  
138 INHBE  
139 IL36G  
140 STAB2

141 GPHB5  
142 OSGIN1  
143 HRG  
144 SKIV2L  
145 MC3R  
146 NODAL  
147 FGF21  
148 LRSAM1  
149 GREM2  
150 STAT3  
151 FSHR  
152 XCR1  
153 NOS1  
154 IL17RA  
155 PDYN  
156 PROK1  
157 TNFRSF1A  
158 HCK  
159 GAL  
160 TNFRSF10C  
161 IL37  
162 NFATC4  
163 FGR  
164 VGF  
165 IFNA4  
166 NGF  
167 AMHR2  
168 MUC4  
169 ARRB1  
170 ADIPOQ  
171 ENG  
172 PML  
173 TRHR  
174 IL17RE  
175 TNC  
176 GPHA2  
177 NPR1  
178 NDP  
179 CSF3  
180 MC4R  
181 NDRG1  
182 HLA-B  
183 CRHR2  
184 VAV1  
185 NPPB  
186 MAP3K8  
187 IL21R

188 NEDD4  
189 LIMS1  
190 PLCG2  
191 TNFRSF13B  
192 MAP2K1  
193 TNFRSF11A  
194 CD1A  
195 CMTM7  
196 SOD1  
197 PENK  
198 OGN  
199 PDK1  
200 EDN1  
201 EED  
202 PTPN11  
203 TRAF3  
204 CD1D  
205 PTK2  
206 CCL4  
207 KLRC1  
208 XCL1  
209 TNFSF11  
210 TNFSF15  
211 PTGDR  
212 CXCL11  
213 JAK1  
214 MC1R  
215 PDIA3  
216 HLA-DMA  
217 IL2RB  
218 IL11RA  
219 PIK3R1  
220 RASGRP1  
221 KLRC3  
222 CX3CR1  
223 IL17D  
224 CACYBP  
225 TNFRSF25  
226 LCK  
227 XCL2  
228 SERPINA3  
229 DDX17  
230 CD28  
231 IL5  
232 GDF10  
233 ESR1  
234 HLA-DPA1

235 PRKCQ  
236 FGF7  
237 IL17RB  
238 LMBR1  
239 AR  
240 MALT1  
241 RORA  
242 SBDS  
243 ANGPTL1  
244 NRAS  
245 RABEP1  
246 SEMG2  
247 KLRD1  
248 CCL18  
249 CD79A  
250 ELAVL1  
251 GDF9  
252 PIK3CA  
253 GNRH1  
254 AIMP1  
255 HLA-DOB  
256 CD8A  
257 LANCL1  
258 S1PR1  
259 SEMA4F  
260 HSPA4  
261 CALCRL  
262 TNFRSF21  
263 IL7R  
264 DCK  
265 BACH2  
266 RLN1  
267 NUDT6  
268 CD40LG  
269 PPARA  
270 CCL28  
271 VAV3  
272 MAPK8  
273 TLR7  
274 F2R  
275 CXCR6  
276 TGFB3  
277 KRAS  
278 FAM3C  
279 IL6ST  
280 NR2C1  
281 MET

282 BMP3  
283 PIK3R3  
284 NR1D2  
285 PRL  
286 TXK  
287 BLNK  
288 ALB  
289 ROBO1
