# Supplementary figures and images for: Integrative Analysis of Clinical and Bioinformatics Databases to Reveal the Role of Peripheral Innate Immunity in Kawasaki Disease
Source: Hindawi journal article supplement (doi:10.1155/2023/6699050), 2023-11-14

**CD3D**

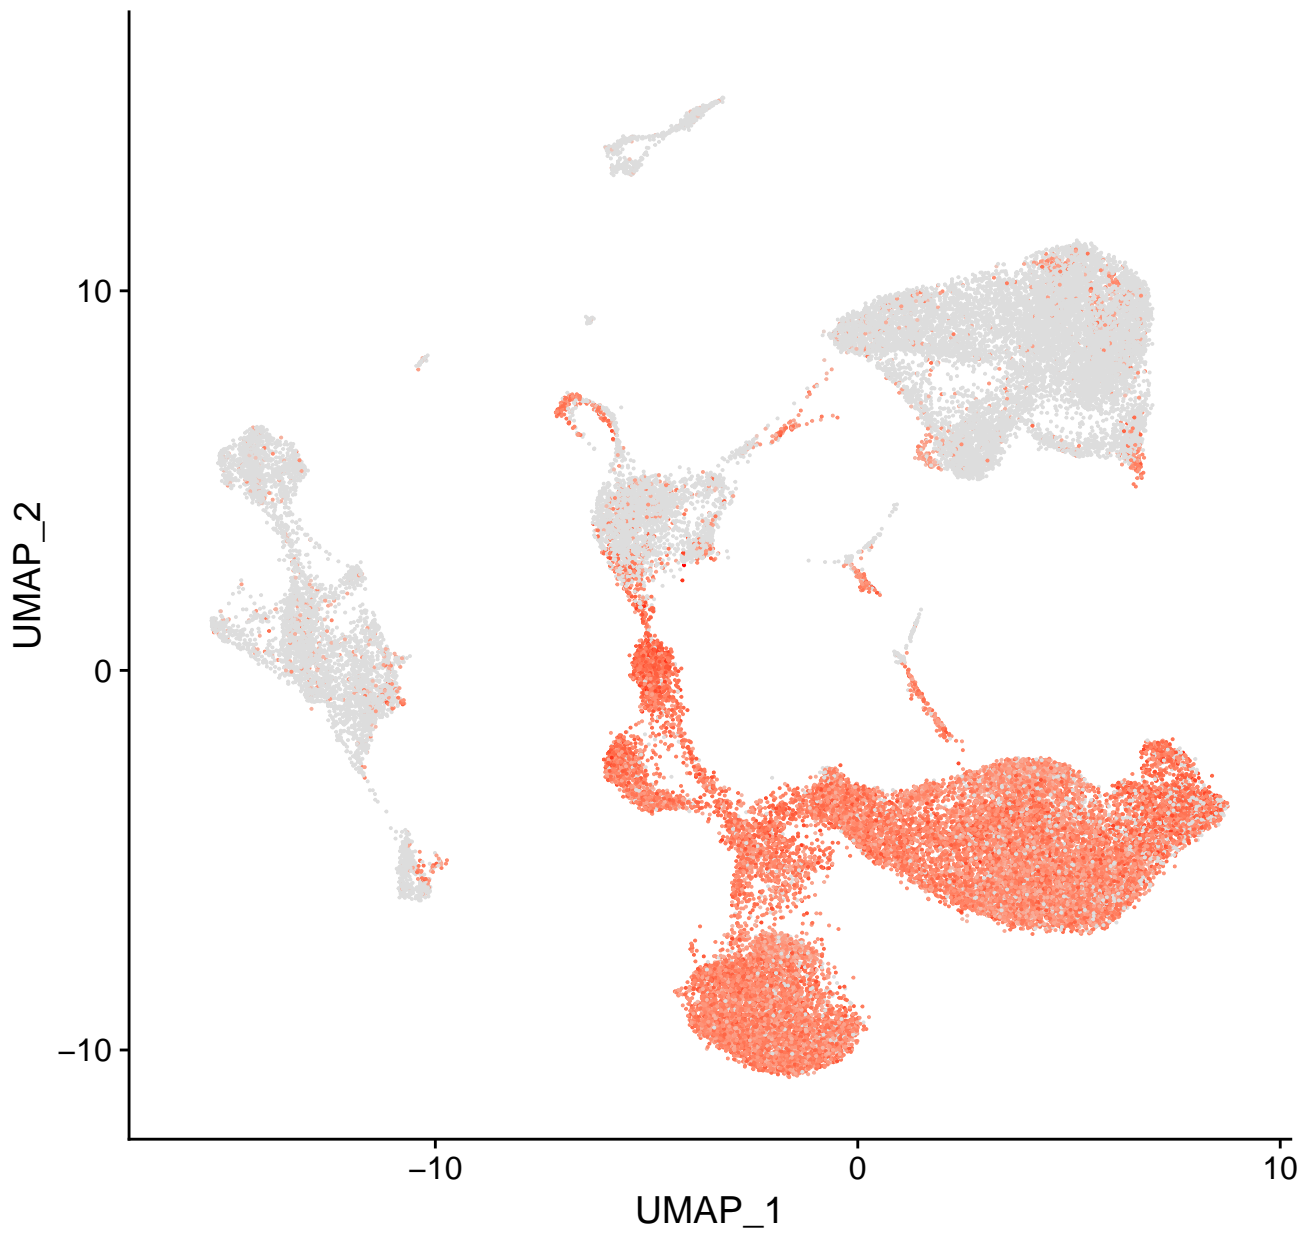

Supplement: f1 [file 6699050.f1.zip]

# CD14

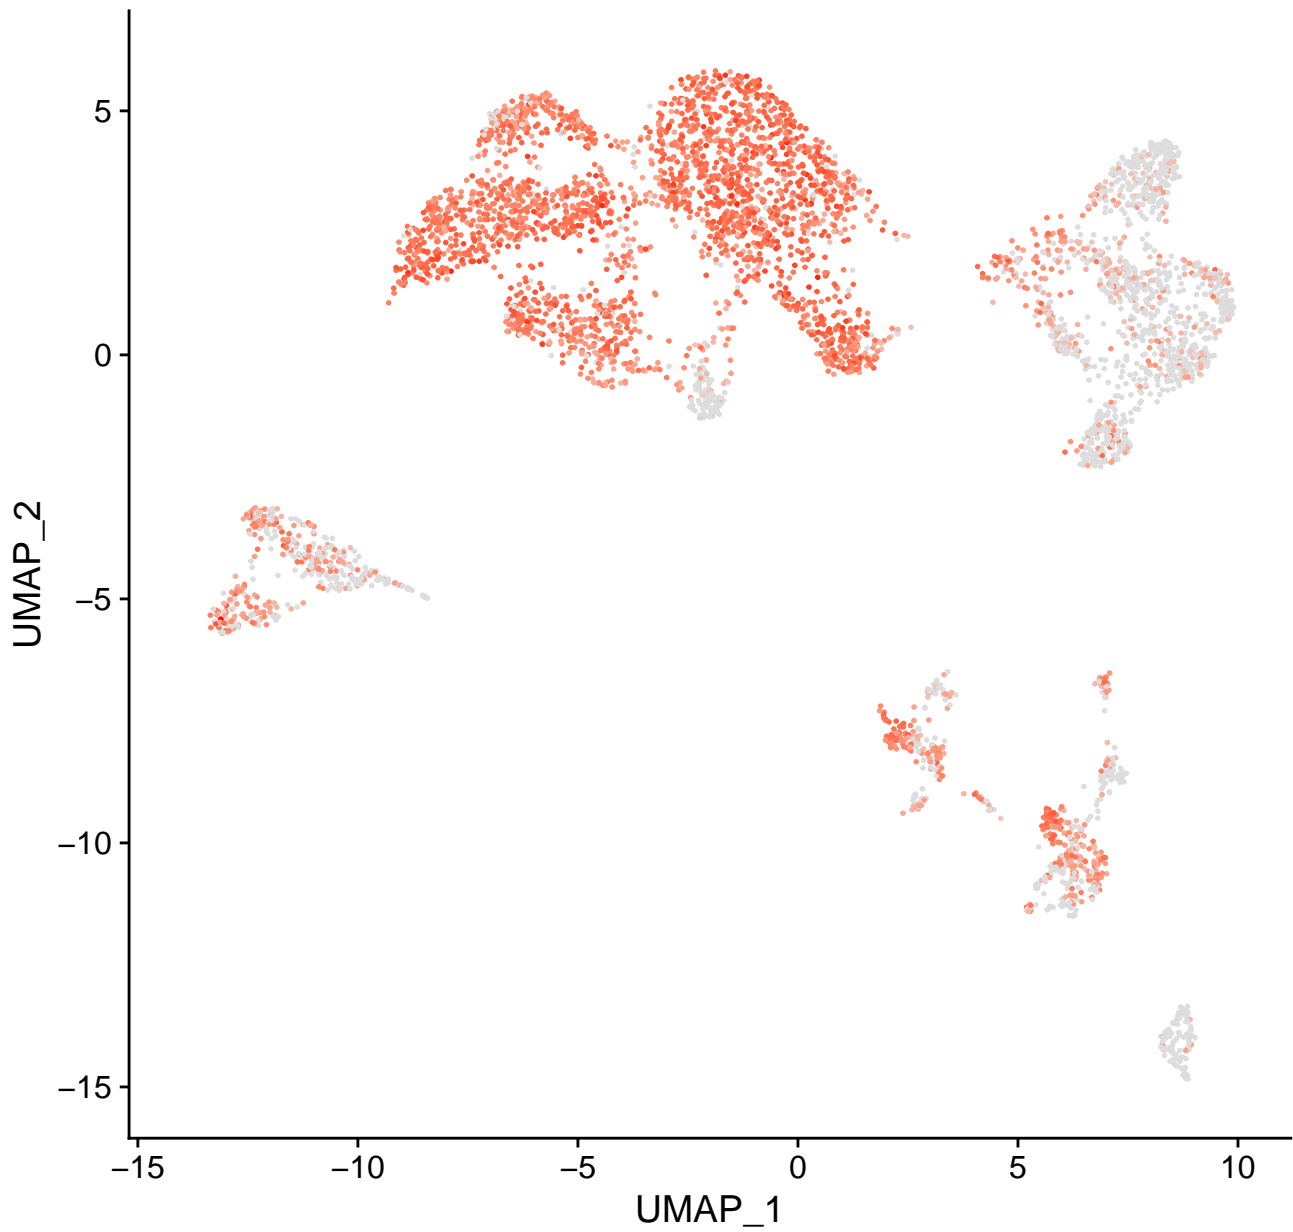

Supplement: f1 [file 6699050.f1.zip]

**CD38**

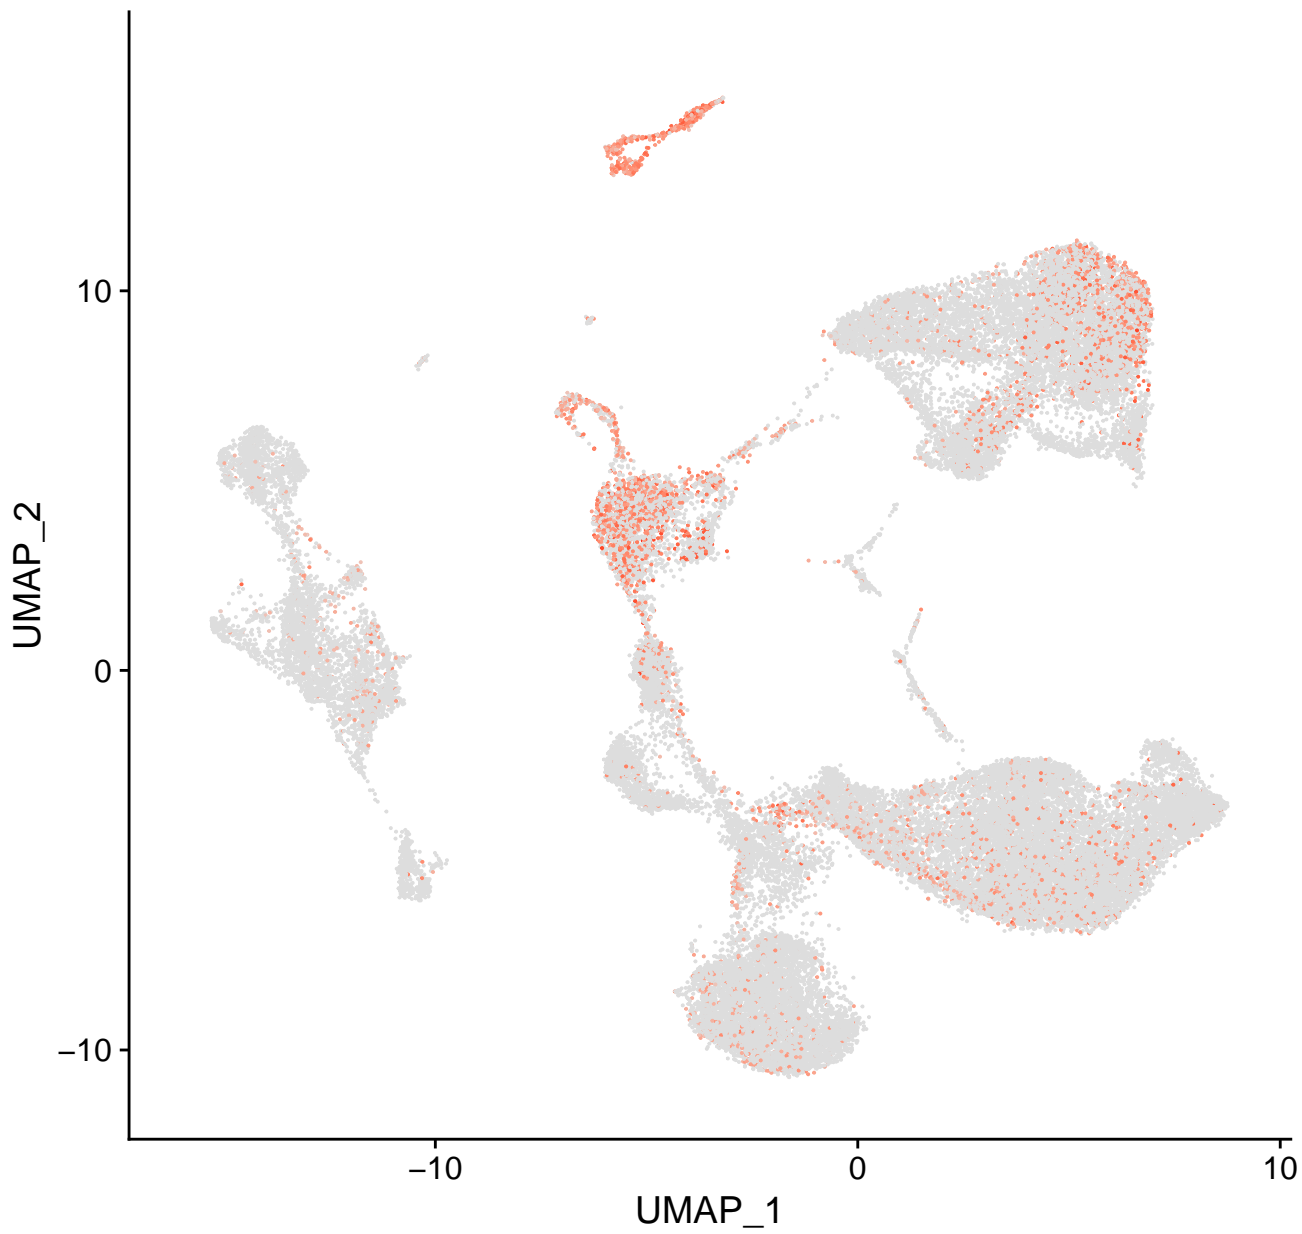

Supplement: f1 [file 6699050.f1.zip]

# LILRA4

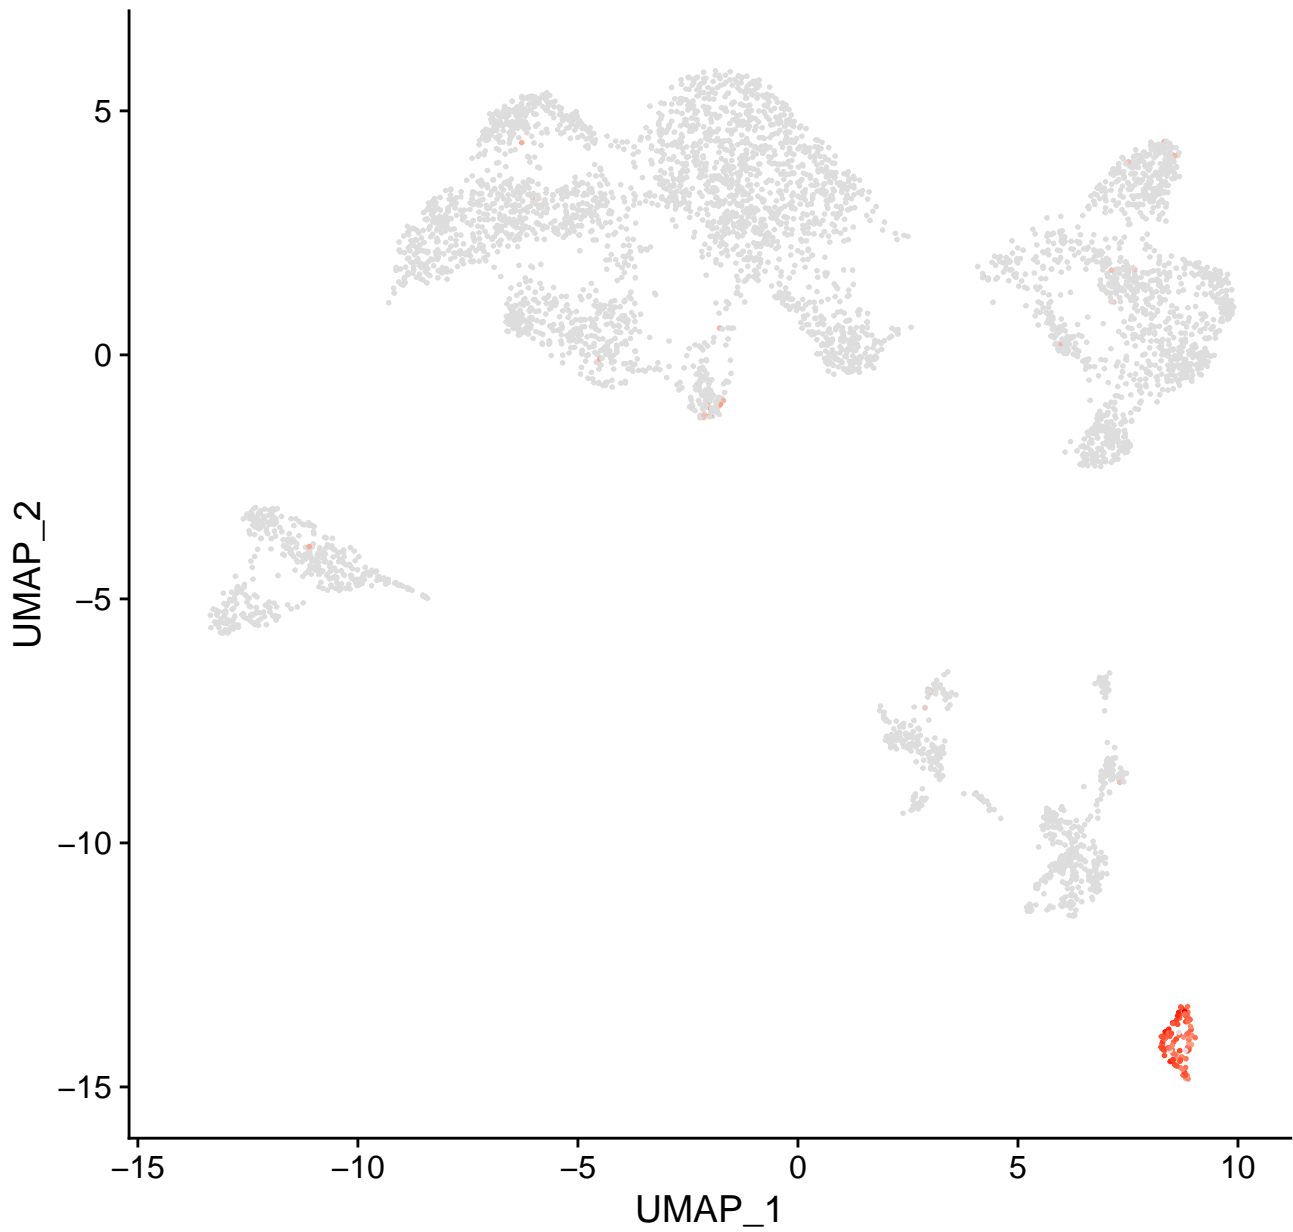

Supplement: f1 [file 6699050.f1.zip]

**HBB**

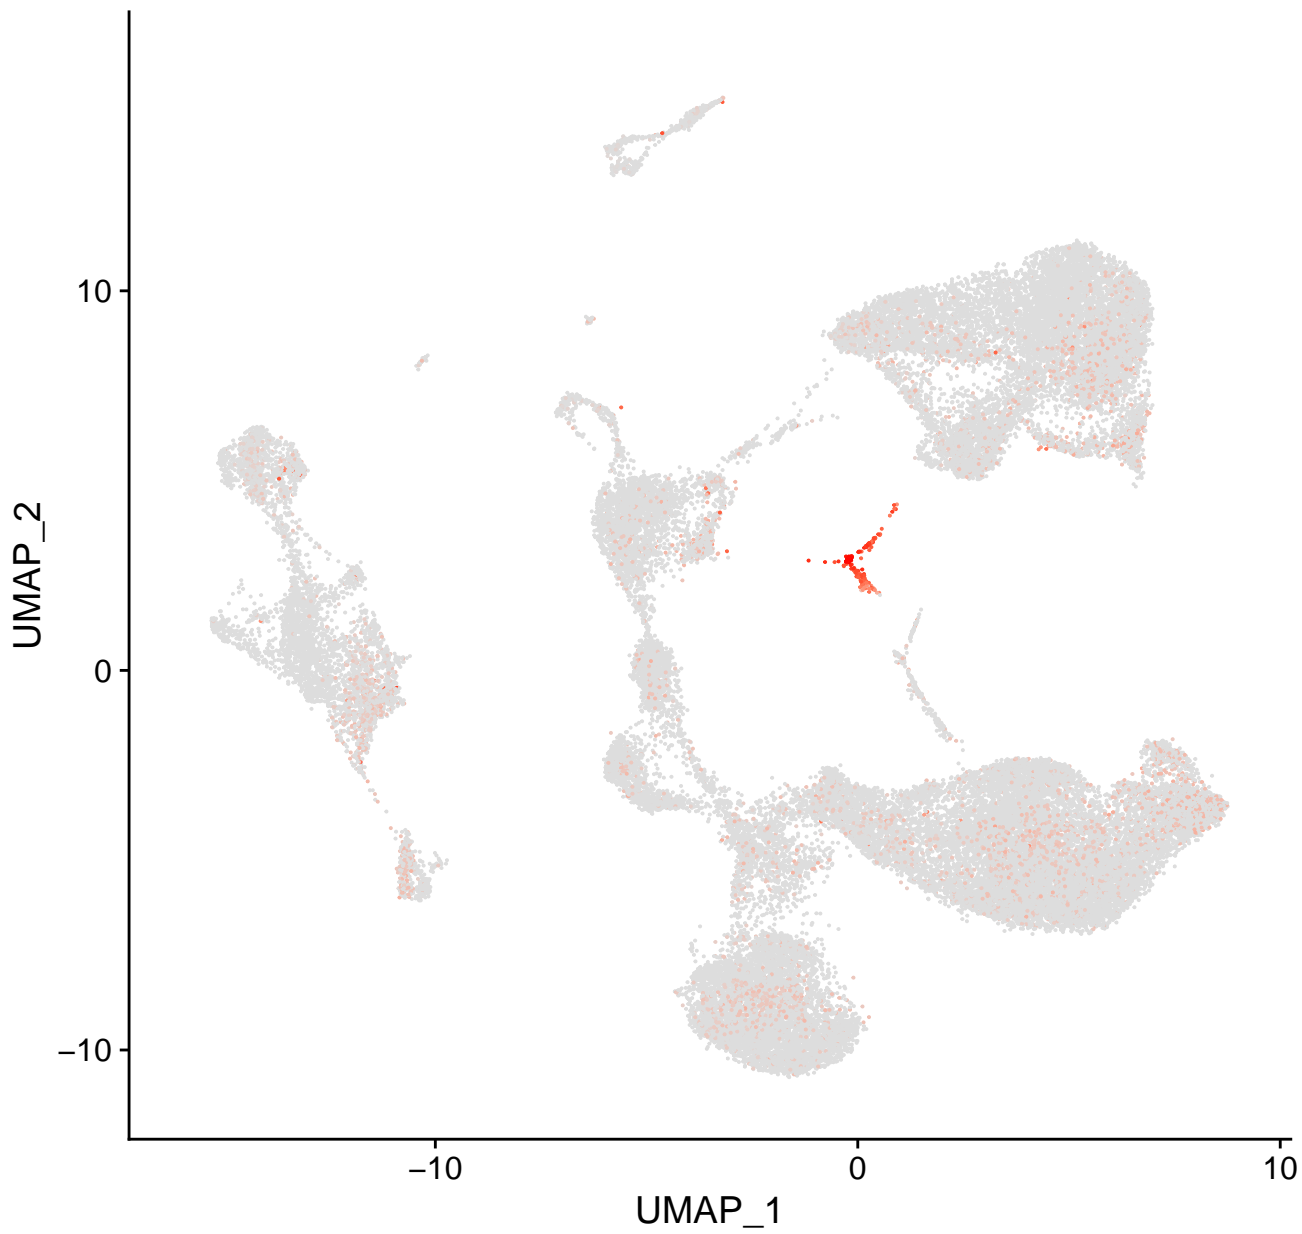

Supplement: f1 [file 6699050.f1.zip]

**CD34**

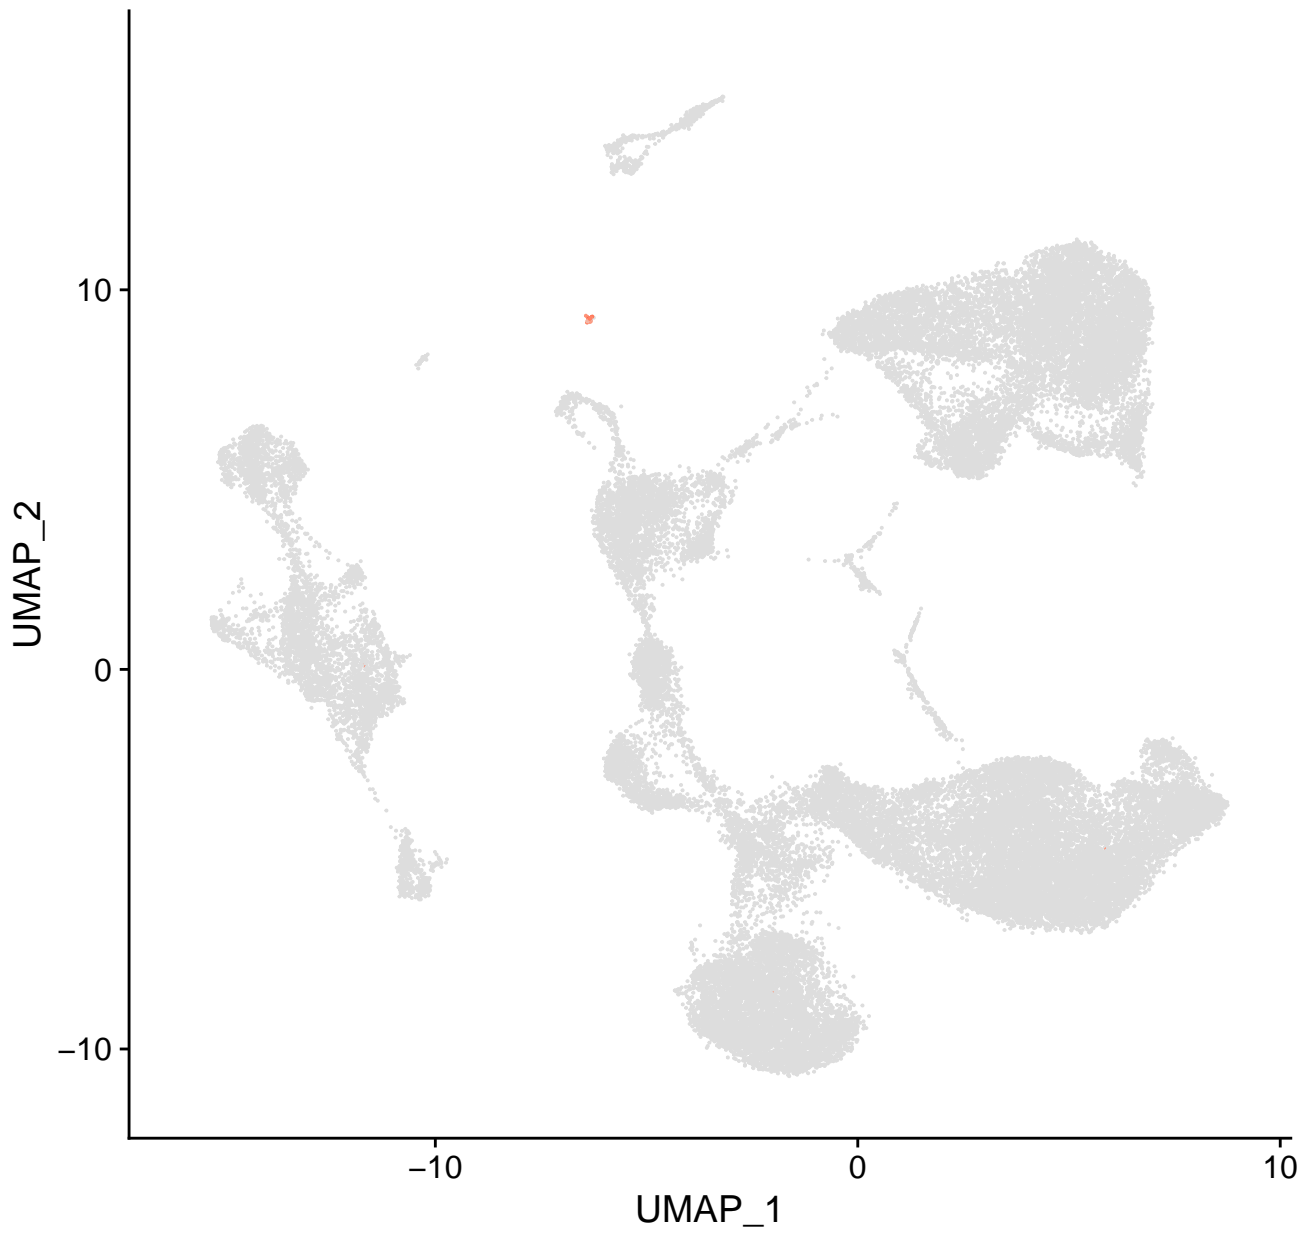

Supplement: f1 [file 6699050.f1.zip]

**nFeature\_RNA**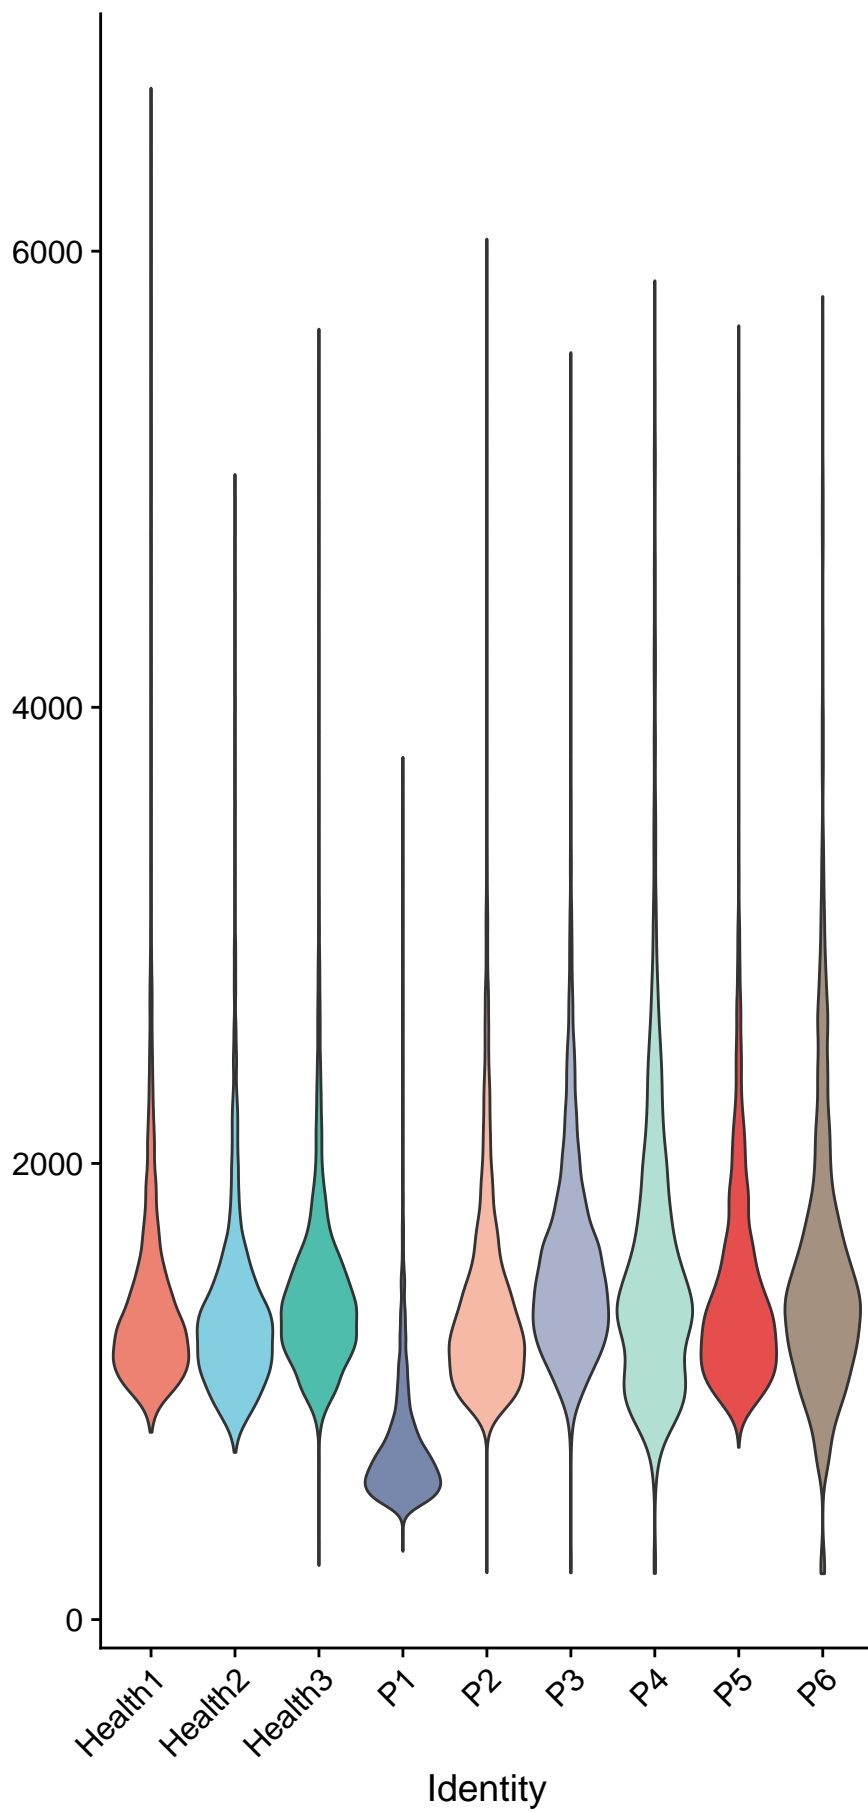**nCount\_RNA**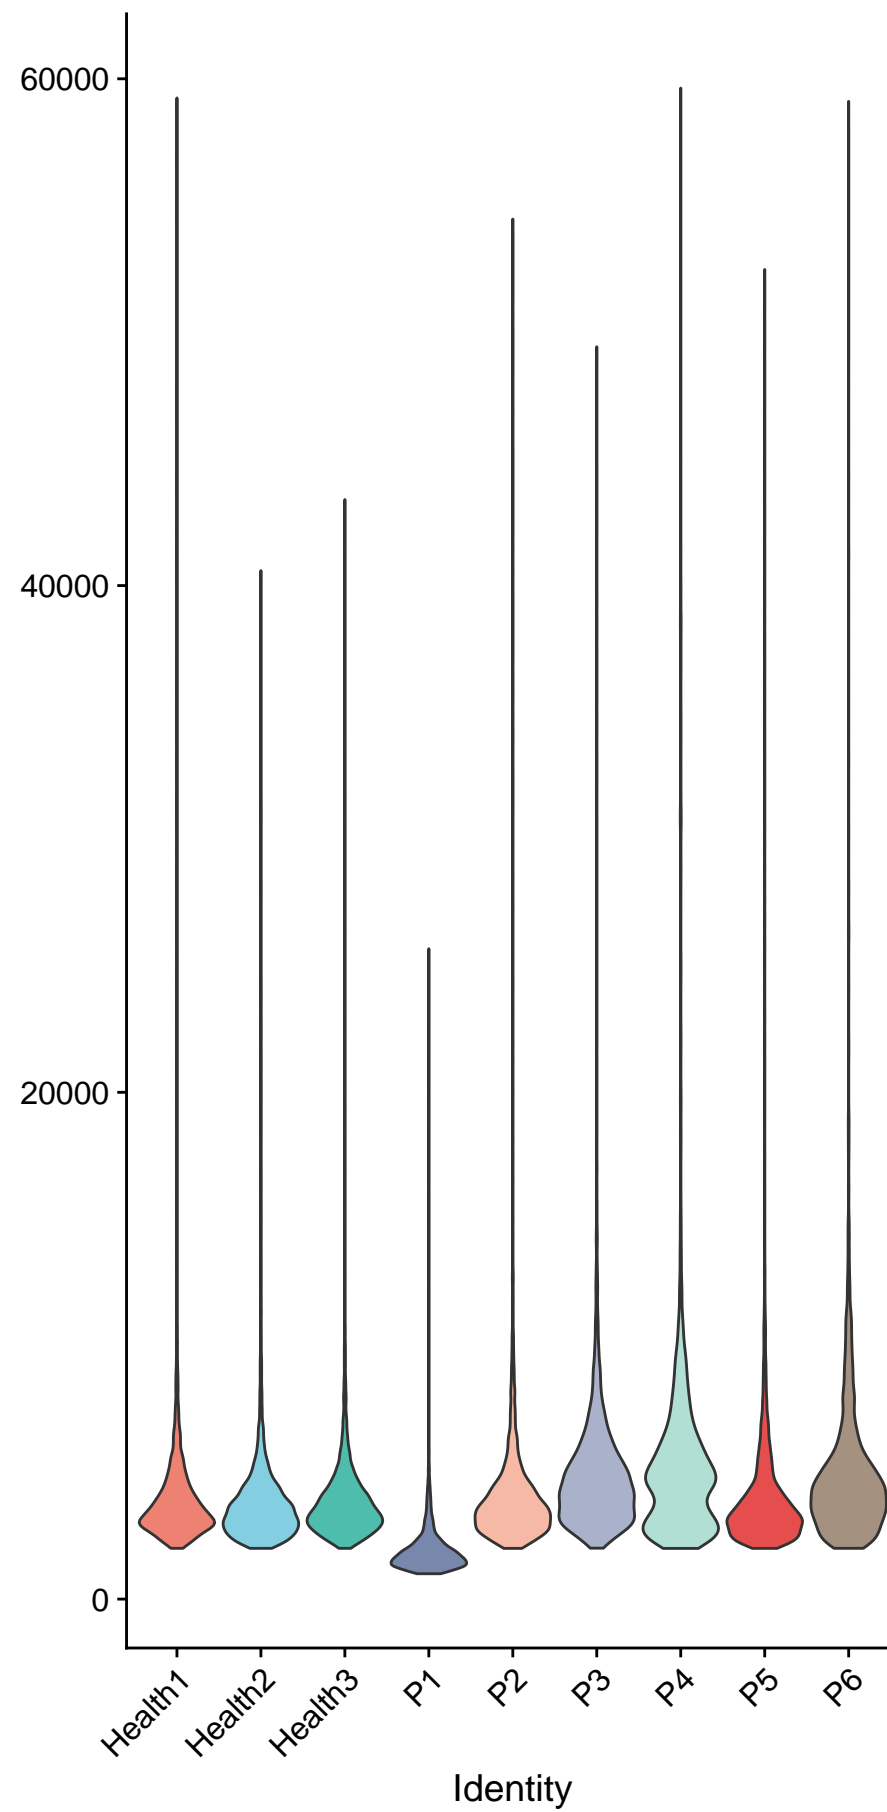**percent.mt**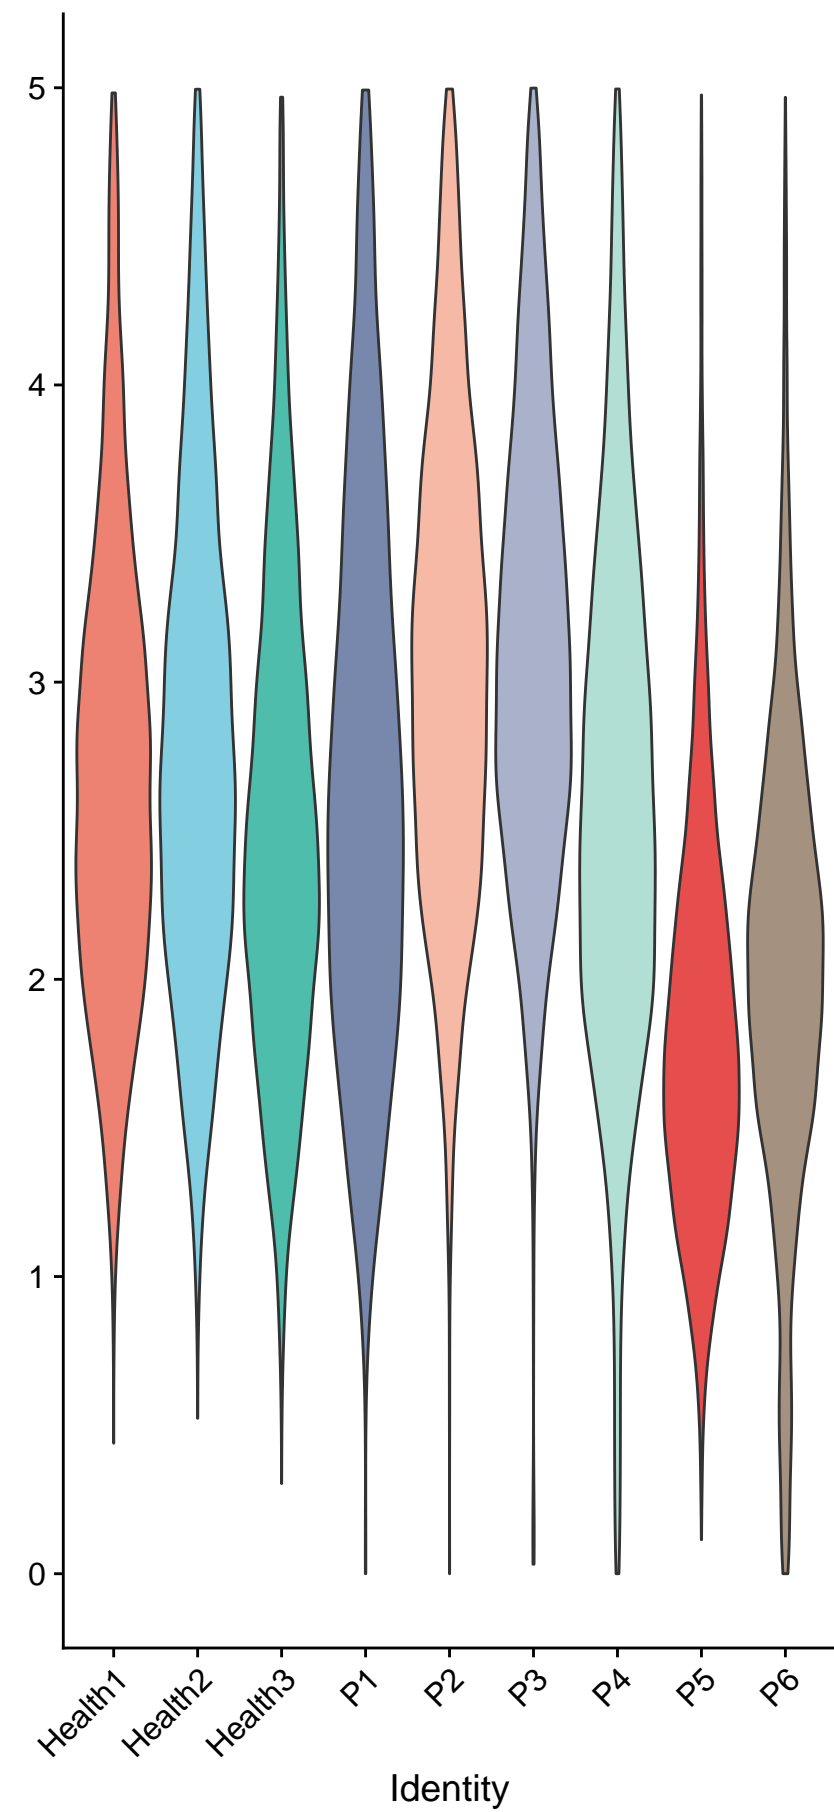

Supplement: f1 [file 6699050.f1.zip › Fig S1.pdf]

LYZ

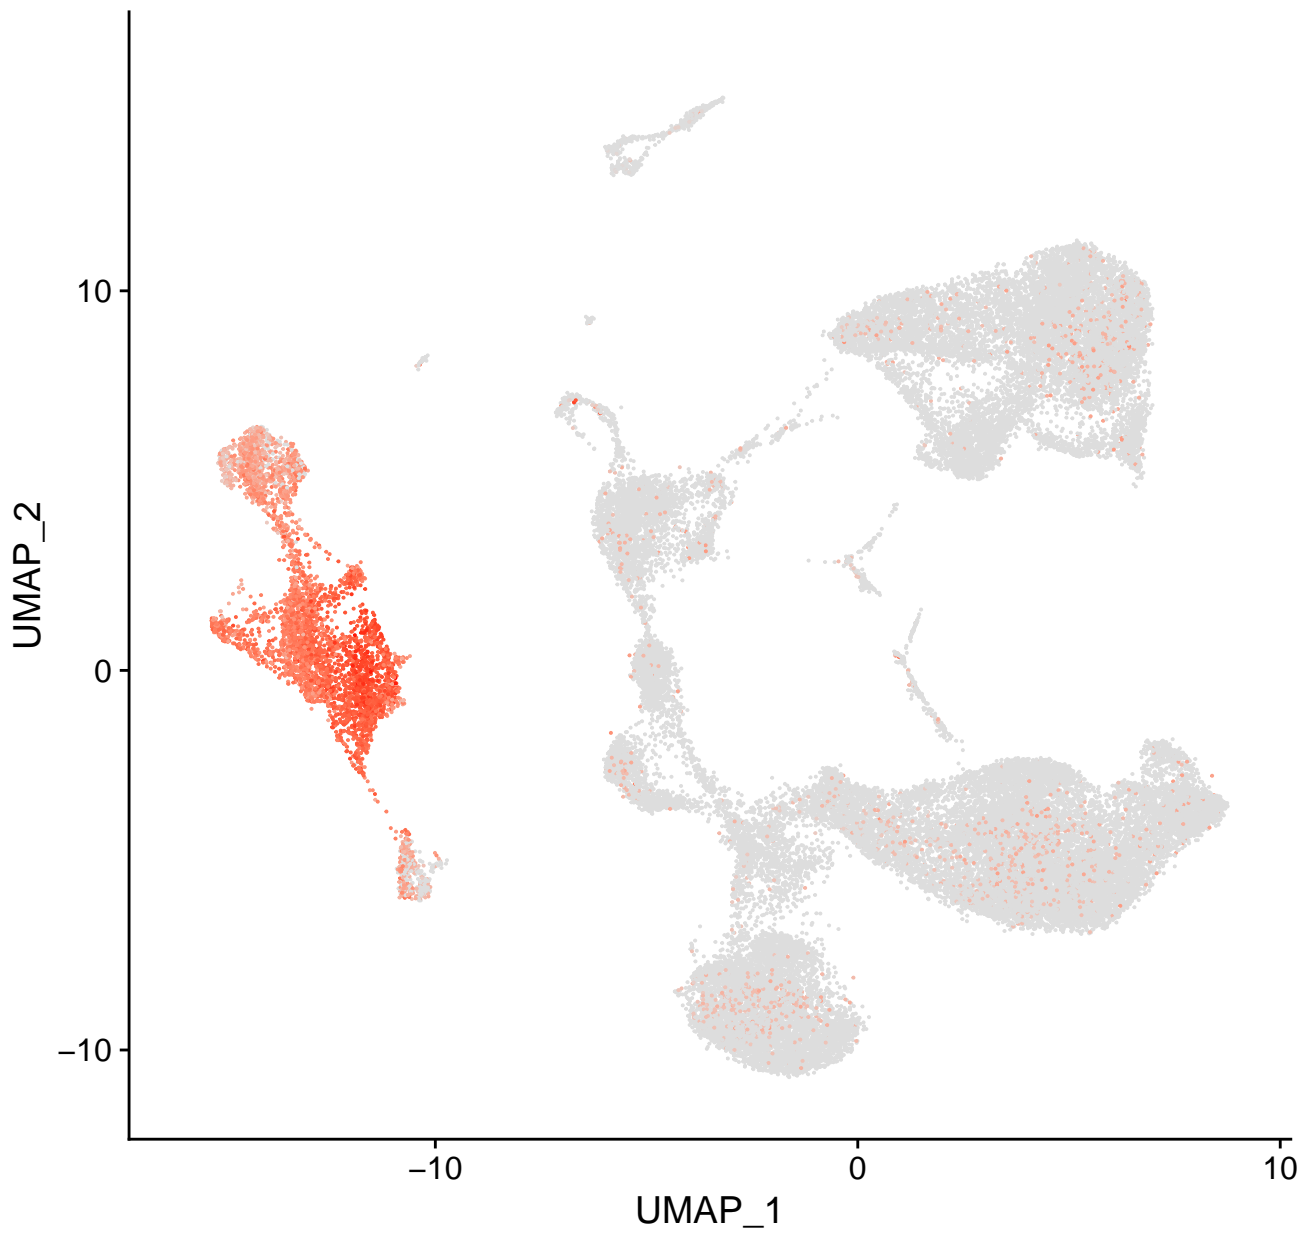

Supplement: f1 [file 6699050.f1.zip › Fig S2 LYZ-myeloidcell.pdf]

# MS4A1

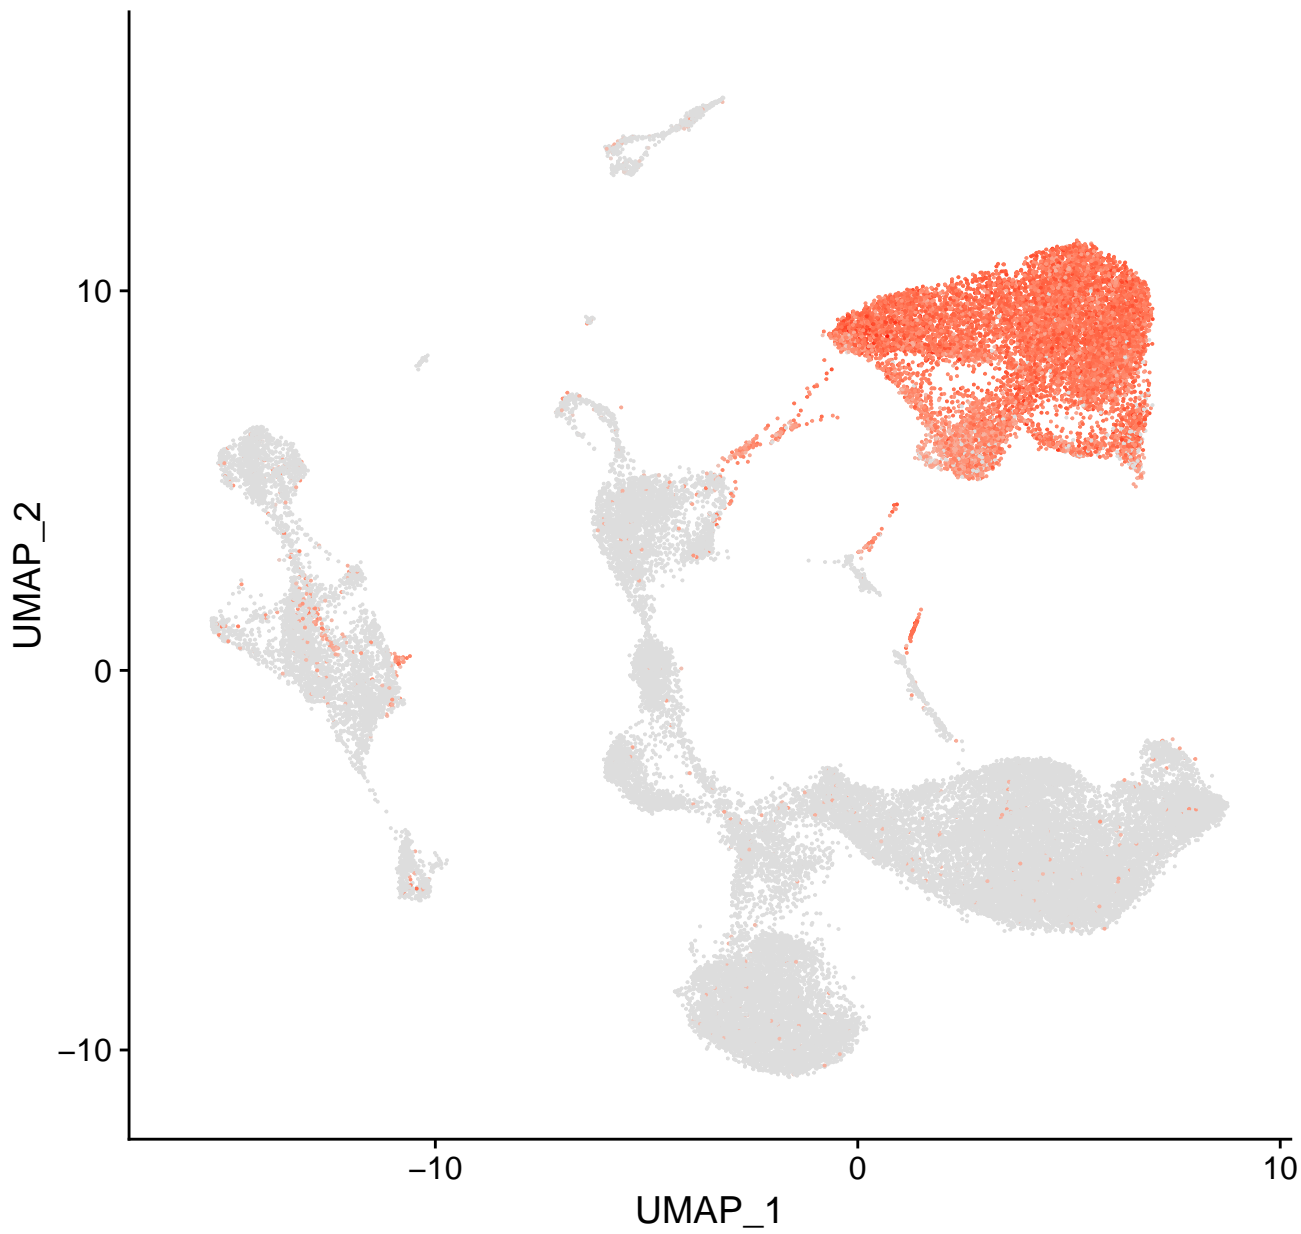

Supplement: f1 [file 6699050.f1.zip › Fig S2 MS4A1-Bcell.pdf]

# PPBP

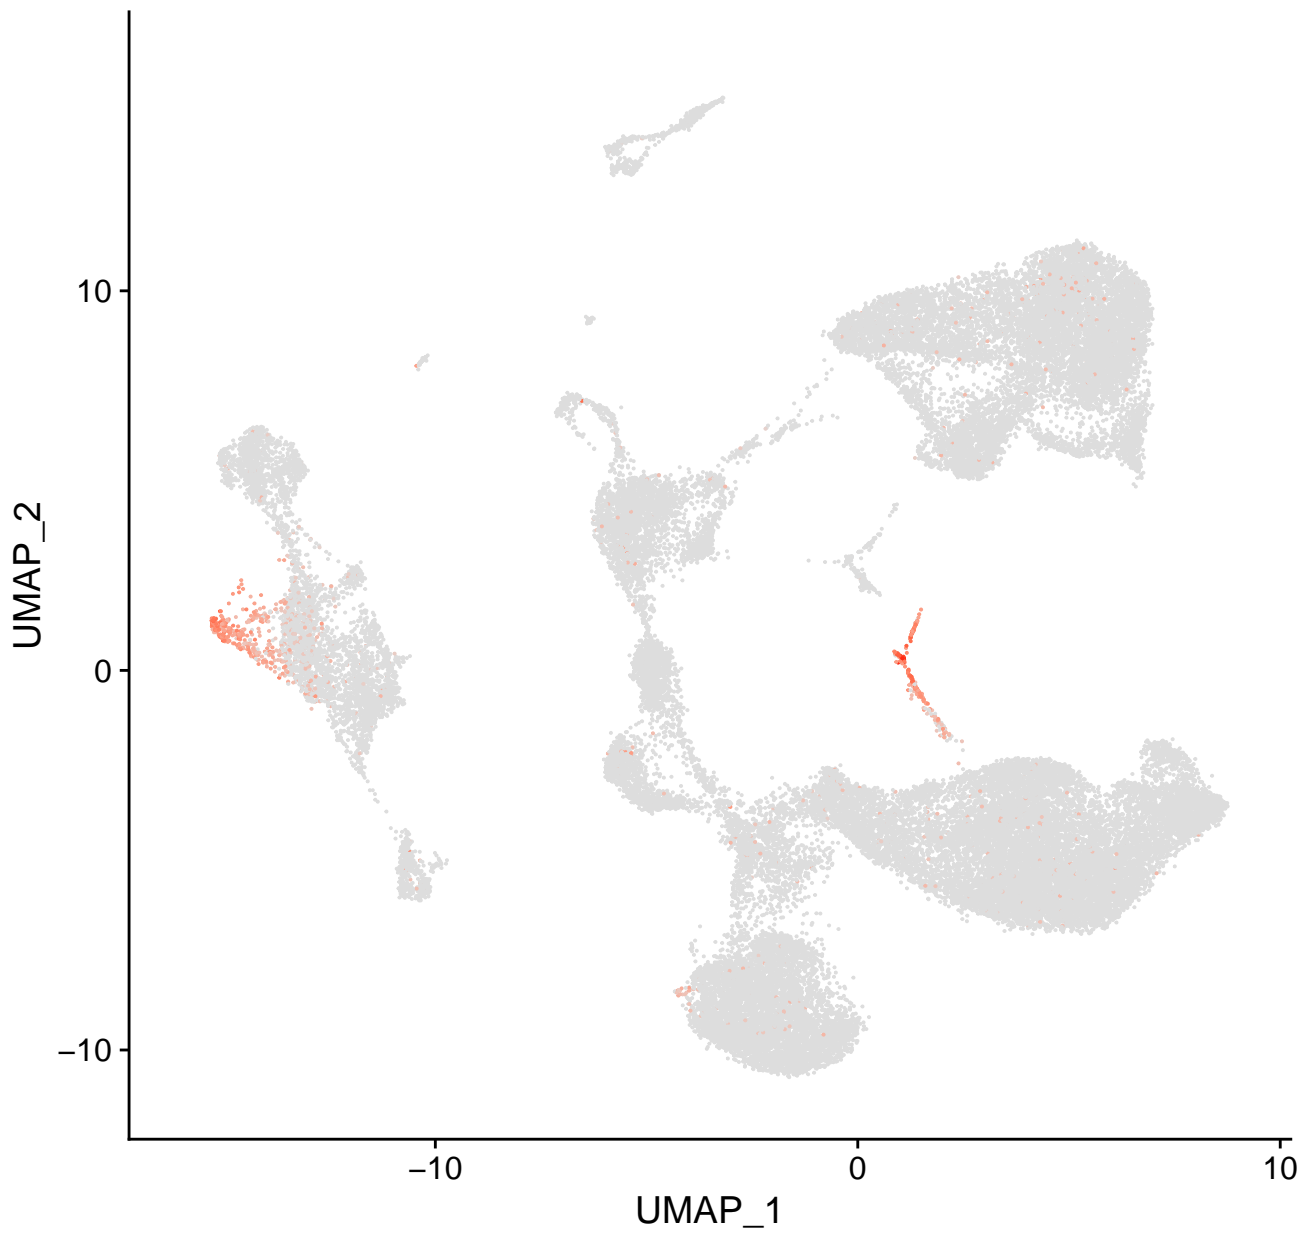

Supplement: f1 [file 6699050.f1.zip › Fig S2 PPBP-platelet.pdf]

# FCGR3A

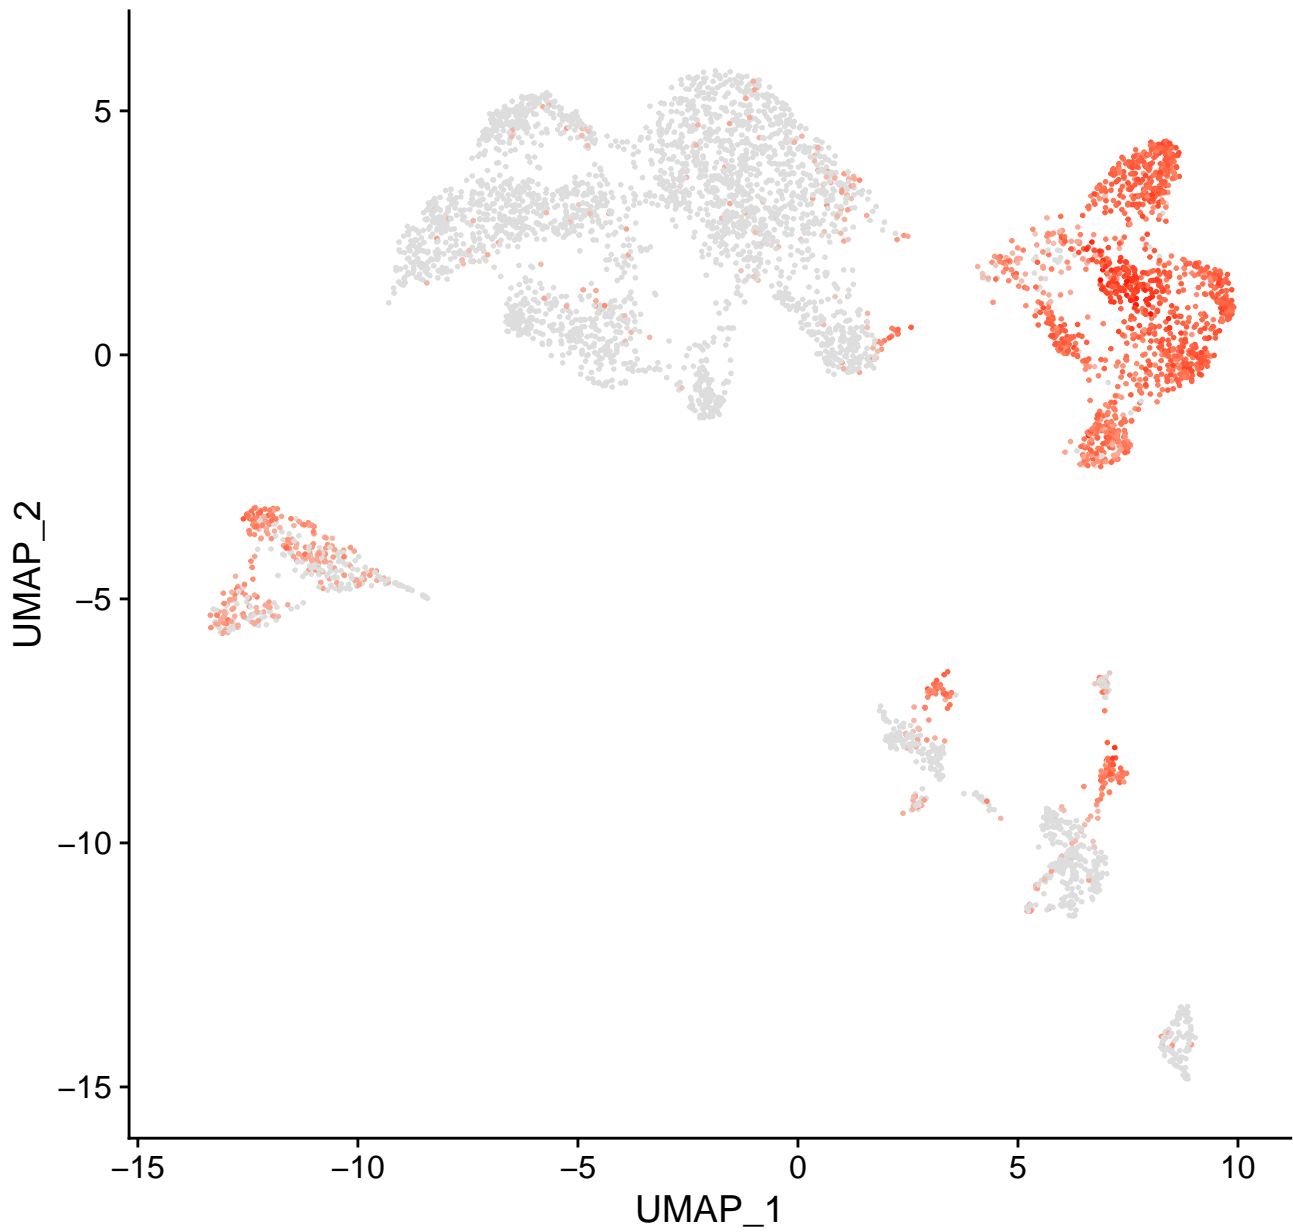

Supplement: f1 [file 6699050.f1.zip › Fig S3 FCGR3A-CD14-CD16+monocytecell.pdf]
